# Supplementary material for: Effect of density on the smoldering of calcium alginate fibers
Source: Royal Society of Chemistry journal article supplement (doi:10.1039/d4ra04871g), 2024-01-01
Supplement: d4ra04871g1.pdf [file d4ra04871g1.pdf]

|           |    |       |       |       |       |       |
|-----------|----|-------|-------|-------|-------|-------|
| 40kg480C° | 0  | 23.15 | 22.14 | 21.88 | 21.82 | 21.9  |
|           | 2  | 23.13 | 22.12 | 21.87 | 21.81 | 21.88 |
|           | 4  | 23.14 | 22.11 | 21.87 | 21.8  | 21.88 |
|           | 6  | 23.16 | 22.13 | 21.89 | 21.81 | 21.89 |
|           | 8  | 23.15 | 22.14 | 21.88 | 21.81 | 21.9  |
|           | 10 | 23.14 | 22.13 | 21.88 | 21.8  | 21.9  |
|           | 12 | 23.14 | 22.13 | 21.88 | 21.8  | 21.89 |
|           | 14 | 23.15 | 22.12 | 21.88 | 21.8  | 21.89 |
|           | 16 | 23.15 | 22.1  | 21.87 | 21.8  | 21.88 |
|           | 18 | 23.14 | 22.09 | 21.86 | 21.79 | 21.87 |
|           | 20 | 23.16 | 22.11 | 21.88 | 21.8  | 21.89 |
|           | 22 | 23.17 | 22.11 | 21.88 | 21.8  | 21.89 |
|           | 24 | 23.17 | 22.11 | 21.9  | 21.82 | 21.9  |
|           | 26 | 23.19 | 22.12 | 21.9  | 21.82 | 21.92 |
|           | 28 | 23.22 | 22.16 | 21.93 | 21.86 | 21.94 |
|           | 30 | 23.18 | 22.1  | 21.88 | 21.8  | 21.89 |
|           | 32 | 23.19 | 22.1  | 21.87 | 21.8  | 21.89 |
|           | 34 | 23.19 | 22.11 | 21.88 | 21.82 | 21.92 |
|           | 36 | 23.19 | 22.11 | 21.89 | 21.8  | 21.91 |
|           | 38 | 23.18 | 22.09 | 21.87 | 21.77 | 21.89 |
|           | 40 | 23.19 | 22.1  | 21.87 | 21.79 | 21.89 |
|           | 42 | 23.19 | 22.07 | 21.86 | 21.77 | 21.89 |
|           | 44 | 23.23 | 22.12 | 21.9  | 21.8  | 21.92 |
|           | 46 | 23.23 | 22.1  | 21.89 | 21.79 | 21.91 |
|           | 48 | 23.25 | 22.12 | 21.9  | 21.8  | 21.92 |
|           | 50 | 23.22 | 22.08 | 21.88 | 21.78 | 21.91 |
|           | 52 | 23.26 | 22.1  | 21.89 | 21.8  | 21.92 |
|           | 54 | 23.28 | 22.11 | 21.9  | 21.81 | 21.92 |
|           | 56 | 23.3  | 22.11 | 21.9  | 21.81 | 21.92 |
|           | 58 | 23.29 | 22.09 | 21.89 | 21.8  | 21.89 |
|           | 60 | 23.33 | 22.1  | 21.89 | 21.8  | 21.91 |
|           | 62 | 23.35 | 22.1  | 21.89 | 21.8  | 21.91 |
|           | 64 | 23.37 | 22.1  | 21.91 | 21.81 | 21.93 |
|           | 66 | 23.38 | 22.09 | 21.89 | 21.79 | 21.91 |
|           | 68 | 23.4  | 22.08 | 21.89 | 21.8  | 21.91 |
|           | 70 | 23.43 | 22.07 | 21.89 | 21.79 | 21.91 |
|           | 72 | 23.45 | 22.07 | 21.88 | 21.79 | 21.9  |
|           | 74 | 23.48 | 22.07 | 21.88 | 21.79 | 21.9  |
|           | 76 | 23.46 | 22.04 | 21.84 | 21.74 | 21.88 |
|           | 78 | 23.48 | 22.02 | 21.82 | 21.72 | 21.85 |
|           | 80 | 23.54 | 22.05 | 21.86 | 21.75 | 21.88 |
|           | 82 | 23.58 | 22.06 | 21.86 | 21.76 | 21.88 |
|           | 84 | 23.63 | 22.06 | 21.86 | 21.77 | 21.9  |
|           | 86 | 23.66 | 22.05 | 21.87 | 21.76 | 21.89 |

|     |       |       |       |       |       |
|-----|-------|-------|-------|-------|-------|
| 88  | 23.68 | 22.03 | 21.85 | 21.75 | 21.88 |
| 90  | 23.73 | 22.04 | 21.85 | 21.75 | 21.88 |
| 92  | 23.77 | 22.04 | 21.85 | 21.74 | 21.88 |
| 94  | 23.8  | 22.04 | 21.84 | 21.74 | 21.89 |
| 96  | 23.84 | 22.04 | 21.84 | 21.73 | 21.88 |
| 98  | 23.87 | 22.02 | 21.82 | 21.72 | 21.87 |
| 100 | 23.94 | 22.03 | 21.83 | 21.73 | 21.88 |
| 102 | 24    | 22.03 | 21.84 | 21.73 | 21.89 |
| 104 | 24.03 | 22.01 | 21.82 | 21.71 | 21.86 |
| 106 | 24.1  | 22.01 | 21.81 | 21.7  | 21.87 |
| 108 | 24.14 | 21.99 | 21.81 | 21.68 | 21.85 |
| 110 | 24.18 | 21.96 | 21.77 | 21.68 | 21.82 |
| 112 | 24.27 | 21.99 | 21.8  | 21.72 | 21.87 |
| 114 | 24.36 | 21.99 | 21.81 | 21.71 | 21.86 |
| 116 | 24.44 | 22.02 | 21.83 | 21.73 | 21.87 |
| 118 | 24.49 | 22.01 | 21.82 | 21.72 | 21.88 |
| 120 | 24.5  | 21.95 | 21.77 | 21.67 | 21.83 |
| 122 | 24.62 | 21.99 | 21.79 | 21.67 | 21.83 |
| 124 | 24.71 | 22    | 21.8  | 21.7  | 21.86 |
| 126 | 24.76 | 21.99 | 21.79 | 21.68 | 21.85 |
| 128 | 24.86 | 21.99 | 21.8  | 21.69 | 21.86 |
| 130 | 24.95 | 22    | 21.8  | 21.69 | 21.87 |
| 132 | 24.99 | 21.97 | 21.77 | 21.65 | 21.85 |
| 134 | 25.09 | 21.99 | 21.8  | 21.68 | 21.86 |
| 136 | 25.18 | 21.99 | 21.8  | 21.68 | 21.87 |
| 138 | 25.25 | 21.98 | 21.77 | 21.65 | 21.84 |
| 140 | 25.33 | 21.97 | 21.77 | 21.65 | 21.84 |
| 142 | 25.42 | 21.97 | 21.77 | 21.65 | 21.83 |
| 144 | 25.55 | 21.96 | 21.77 | 21.65 | 21.85 |
| 146 | 25.66 | 21.99 | 21.78 | 21.67 | 21.86 |
| 148 | 25.74 | 21.99 | 21.79 | 21.66 | 21.86 |
| 150 | 25.84 | 21.99 | 21.78 | 21.67 | 21.86 |
| 152 | 25.96 | 21.99 | 21.78 | 21.66 | 21.86 |
| 154 | 26.06 | 21.99 | 21.78 | 21.66 | 21.87 |
| 156 | 26.17 | 21.99 | 21.78 | 21.67 | 21.87 |
| 158 | 26.27 | 21.98 | 21.77 | 21.65 | 21.84 |
| 160 | 26.41 | 22    | 21.78 | 21.67 | 21.85 |
| 162 | 26.51 | 21.98 | 21.76 | 21.65 | 21.83 |
| 164 | 26.61 | 21.98 | 21.75 | 21.65 | 21.82 |
| 166 | 26.72 | 21.97 | 21.74 | 21.64 | 21.81 |
| 168 | 26.86 | 21.97 | 21.75 | 21.64 | 21.82 |
| 170 | 26.99 | 21.97 | 21.74 | 21.61 | 21.81 |
| 172 | 27.12 | 21.99 | 21.76 | 21.64 | 21.84 |
| 174 | 27.26 | 22.02 | 21.77 | 21.65 | 21.85 |

|     |       |       |       |       |       |
|-----|-------|-------|-------|-------|-------|
| 176 | 27.4  | 22.02 | 21.77 | 21.65 | 21.85 |
| 178 | 27.49 | 21.99 | 21.73 | 21.61 | 21.8  |
| 180 | 27.62 | 22    | 21.74 | 21.61 | 21.82 |
| 182 | 27.76 | 22    | 21.74 | 21.61 | 21.81 |
| 184 | 27.9  | 22    | 21.72 | 21.59 | 21.8  |
| 186 | 28.01 | 21.98 | 21.72 | 21.59 | 21.81 |
| 188 | 28.13 | 21.99 | 21.7  | 21.57 | 21.79 |
| 190 | 28.28 | 22    | 21.7  | 21.57 | 21.8  |
| 192 | 28.46 | 22.03 | 21.73 | 21.59 | 21.82 |
| 194 | 28.62 | 22.05 | 21.75 | 21.61 | 21.85 |
| 196 | 28.75 | 22.04 | 21.73 | 21.6  | 21.83 |
| 198 | 28.88 | 22.02 | 21.7  | 21.56 | 21.8  |
| 200 | 29.05 | 22.03 | 21.7  | 21.56 | 21.81 |
| 202 | 29.2  | 22.06 | 21.7  | 21.57 | 21.82 |
| 204 | 29.34 | 22.05 | 21.69 | 21.56 | 21.8  |
| 206 | 29.49 | 22.07 | 21.69 | 21.55 | 21.8  |
| 208 | 29.66 | 22.06 | 21.68 | 21.54 | 21.79 |
| 210 | 29.82 | 22.07 | 21.69 | 21.55 | 21.79 |
| 212 | 30.01 | 22.09 | 21.7  | 21.56 | 21.8  |
| 214 | 30.18 | 22.1  | 21.71 | 21.56 | 21.81 |
| 216 | 30.33 | 22.11 | 21.71 | 21.56 | 21.8  |
| 218 | 30.49 | 22.12 | 21.7  | 21.55 | 21.8  |
| 220 | 30.69 | 22.15 | 21.72 | 21.58 | 21.83 |
| 222 | 30.85 | 22.17 | 21.72 | 21.58 | 21.83 |
| 224 | 31.04 | 22.19 | 21.73 | 21.58 | 21.83 |
| 226 | 31.2  | 22.2  | 21.73 | 21.57 | 21.83 |
| 228 | 31.36 | 22.21 | 21.73 | 21.57 | 21.83 |
| 230 | 31.53 | 22.22 | 21.73 | 21.57 | 21.84 |
| 232 | 31.74 | 22.23 | 21.73 | 21.58 | 21.83 |
| 234 | 31.91 | 22.27 | 21.73 | 21.59 | 21.84 |
| 236 | 32.09 | 22.29 | 21.73 | 21.59 | 21.83 |
| 238 | 32.27 | 22.29 | 21.73 | 21.58 | 21.83 |
| 240 | 32.44 | 22.27 | 21.7  | 21.55 | 21.8  |
| 242 | 32.65 | 22.33 | 21.73 | 21.58 | 21.83 |
| 244 | 32.84 | 22.35 | 21.74 | 21.57 | 21.83 |
| 246 | 33.01 | 22.37 | 21.74 | 21.57 | 21.83 |
| 248 | 33.21 | 22.4  | 21.73 | 21.56 | 21.83 |
| 250 | 33.4  | 22.4  | 21.73 | 21.55 | 21.83 |
| 252 | 33.59 | 22.42 | 21.73 | 21.55 | 21.83 |
| 254 | 33.81 | 22.46 | 21.76 | 21.56 | 21.84 |
| 256 | 34.06 | 22.51 | 21.78 | 21.6  | 21.88 |
| 258 | 34.21 | 22.5  | 21.75 | 21.56 | 21.86 |
| 260 | 34.37 | 22.48 | 21.71 | 21.53 | 21.82 |
| 262 | 34.57 | 22.52 | 21.73 | 21.55 | 21.83 |

|     |       |       |       |       |       |
|-----|-------|-------|-------|-------|-------|
| 264 | 34.83 | 22.57 | 21.74 | 21.56 | 21.84 |
| 266 | 35.05 | 22.61 | 21.76 | 21.58 | 21.85 |
| 268 | 35.22 | 22.61 | 21.75 | 21.57 | 21.84 |
| 270 | 35.4  | 22.63 | 21.75 | 21.56 | 21.83 |
| 272 | 35.59 | 22.66 | 21.75 | 21.55 | 21.84 |
| 274 | 35.82 | 22.68 | 21.74 | 21.54 | 21.82 |
| 276 | 36.02 | 22.72 | 21.75 | 21.55 | 21.83 |
| 278 | 36.23 | 22.75 | 21.76 | 21.56 | 21.84 |
| 280 | 36.46 | 22.78 | 21.76 | 21.55 | 21.84 |
| 282 | 36.66 | 22.8  | 21.76 | 21.54 | 21.84 |
| 284 | 36.85 | 22.84 | 21.77 | 21.54 | 21.84 |
| 286 | 37.04 | 22.86 | 21.74 | 21.51 | 21.82 |
| 288 | 37.23 | 22.88 | 21.75 | 21.52 | 21.82 |
| 290 | 37.45 | 22.89 | 21.73 | 21.5  | 21.82 |
| 292 | 37.69 | 22.96 | 21.77 | 21.53 | 21.84 |
| 294 | 37.91 | 22.99 | 21.77 | 21.53 | 21.84 |
| 296 | 38.12 | 23.03 | 21.78 | 21.53 | 21.85 |
| 298 | 38.36 | 23.06 | 21.78 | 21.53 | 21.85 |
| 300 | 38.57 | 23.1  | 21.79 | 21.53 | 21.85 |
| 302 | 38.75 | 23.08 | 21.75 | 21.51 | 21.82 |
| 304 | 39.03 | 23.17 | 21.79 | 21.54 | 21.85 |
| 306 | 39.23 | 23.18 | 21.79 | 21.51 | 21.83 |
| 308 | 39.41 | 23.19 | 21.76 | 21.49 | 21.8  |
| 310 | 39.65 | 23.26 | 21.8  | 21.53 | 21.85 |
| 312 | 39.82 | 23.26 | 21.77 | 21.49 | 21.8  |
| 314 | 40.1  | 23.33 | 21.8  | 21.52 | 21.84 |
| 316 | 40.32 | 23.38 | 21.82 | 21.51 | 21.83 |
| 318 | 40.54 | 23.43 | 21.83 | 21.53 | 21.86 |
| 320 | 40.77 | 23.47 | 21.84 | 21.52 | 21.86 |
| 322 | 41.02 | 23.52 | 21.84 | 21.53 | 21.87 |
| 324 | 41.22 | 23.56 | 21.85 | 21.53 | 21.85 |
| 326 | 41.41 | 23.57 | 21.83 | 21.51 | 21.85 |
| 328 | 41.64 | 23.63 | 21.85 | 21.51 | 21.85 |
| 330 | 41.9  | 23.69 | 21.87 | 21.53 | 21.86 |
| 332 | 42.14 | 23.75 | 21.89 | 21.55 | 21.87 |
| 334 | 42.36 | 23.8  | 21.9  | 21.55 | 21.87 |
| 336 | 42.58 | 23.84 | 21.91 | 21.55 | 21.88 |
| 338 | 42.83 | 23.9  | 21.93 | 21.57 | 21.9  |
| 340 | 43.05 | 23.94 | 21.92 | 21.55 | 21.88 |
| 342 | 43.25 | 23.97 | 21.91 | 21.52 | 21.86 |
| 344 | 43.51 | 24.06 | 21.95 | 21.56 | 21.9  |
| 346 | 43.76 | 24.11 | 21.95 | 21.56 | 21.89 |
| 348 | 43.94 | 24.13 | 21.93 | 21.53 | 21.87 |
| 350 | 44.16 | 24.19 | 21.95 | 21.54 | 21.89 |

|     |       |       |       |       |       |
|-----|-------|-------|-------|-------|-------|
| 352 | 44.39 | 24.26 | 21.98 | 21.54 | 21.89 |
| 354 | 44.65 | 24.32 | 21.98 | 21.54 | 21.89 |
| 356 | 44.88 | 24.39 | 22.01 | 21.55 | 21.9  |
| 358 | 45.11 | 24.45 | 22.02 | 21.55 | 21.92 |
| 360 | 45.34 | 24.51 | 22.04 | 21.57 | 21.93 |
| 362 | 45.6  | 24.57 | 22.04 | 21.55 | 21.91 |
| 364 | 45.83 | 24.65 | 22.05 | 21.57 | 21.92 |
| 366 | 46.04 | 24.69 | 22.06 | 21.56 | 21.92 |
| 368 | 46.31 | 24.75 | 22.06 | 21.55 | 21.92 |
| 370 | 46.57 | 24.87 | 22.12 | 21.59 | 21.95 |
| 372 | 46.79 | 24.94 | 22.15 | 21.61 | 21.97 |
| 374 | 47.02 | 25    | 22.16 | 21.61 | 21.98 |
| 376 | 47.27 | 25.05 | 22.16 | 21.6  | 21.97 |
| 378 | 47.49 | 25.12 | 22.17 | 21.62 | 21.98 |
| 380 | 47.73 | 25.21 | 22.2  | 21.62 | 21.99 |
| 382 | 47.96 | 25.28 | 22.22 | 21.63 | 21.99 |
| 384 | 48.22 | 25.34 | 22.22 | 21.62 | 21.98 |
| 386 | 48.45 | 25.42 | 22.25 | 21.63 | 22    |
| 388 | 48.65 | 25.46 | 22.24 | 21.61 | 21.98 |
| 390 | 48.89 | 25.55 | 22.28 | 21.63 | 22.01 |
| 392 | 49.14 | 25.6  | 22.28 | 21.62 | 21.99 |
| 394 | 49.37 | 25.66 | 22.28 | 21.61 | 21.99 |
| 396 | 49.63 | 25.77 | 22.32 | 21.65 | 22.02 |
| 398 | 49.85 | 25.84 | 22.33 | 21.65 | 22.02 |
| 400 | 50.14 | 25.92 | 22.36 | 21.67 | 22.02 |
| 402 | 50.35 | 25.98 | 22.37 | 21.65 | 22    |
| 404 | 50.58 | 26.06 | 22.39 | 21.66 | 22    |
| 406 | 50.84 | 26.15 | 22.42 | 21.68 | 22.02 |
| 408 | 51.08 | 26.18 | 22.4  | 21.65 | 21.99 |
| 410 | 51.3  | 26.28 | 22.42 | 21.67 | 22.02 |
| 412 | 51.51 | 26.34 | 22.43 | 21.67 | 22.01 |
| 414 | 51.74 | 26.43 | 22.45 | 21.67 | 22    |
| 416 | 52.01 | 26.51 | 22.47 | 21.66 | 22.01 |
| 418 | 52.23 | 26.57 | 22.46 | 21.64 | 21.99 |
| 420 | 52.49 | 26.68 | 22.51 | 21.68 | 22.03 |
| 422 | 52.73 | 26.78 | 22.53 | 21.69 | 22.03 |
| 424 | 52.97 | 26.81 | 22.52 | 21.65 | 22    |
| 426 | 53.2  | 26.9  | 22.54 | 21.66 | 22.01 |
| 428 | 53.43 | 26.97 | 22.55 | 21.65 | 22.01 |
| 430 | 53.69 | 27.08 | 22.6  | 21.68 | 22.05 |
| 432 | 53.97 | 27.16 | 22.62 | 21.68 | 22.05 |
| 434 | 54.23 | 27.29 | 22.67 | 21.71 | 22.08 |
| 436 | 54.45 | 27.36 | 22.69 | 21.71 | 22.07 |
| 438 | 54.66 | 27.41 | 22.67 | 21.69 | 22.04 |

|     |       |       |       |       |       |
|-----|-------|-------|-------|-------|-------|
| 440 | 54.91 | 27.48 | 22.69 | 21.69 | 22.04 |
| 442 | 55.12 | 27.56 | 22.69 | 21.67 | 22.03 |
| 444 | 55.4  | 27.69 | 22.75 | 21.72 | 22.08 |
| 446 | 55.65 | 27.78 | 22.77 | 21.71 | 22.07 |
| 448 | 55.92 | 27.86 | 22.81 | 21.73 | 22.08 |
| 450 | 56.15 | 27.93 | 22.81 | 21.72 | 22.06 |
| 452 | 56.38 | 28.01 | 22.82 | 21.73 | 22.06 |
| 454 | 56.63 | 28.1  | 22.85 | 21.74 | 22.08 |
| 456 | 56.91 | 28.19 | 22.88 | 21.75 | 22.08 |
| 458 | 57.11 | 28.27 | 22.87 | 21.72 | 22.06 |
| 460 | 57.36 | 28.35 | 22.91 | 21.75 | 22.08 |
| 462 | 57.59 | 28.43 | 22.92 | 21.74 | 22.07 |
| 464 | 57.91 | 28.56 | 22.99 | 21.8  | 22.13 |
| 466 | 58.15 | 28.68 | 23.02 | 21.81 | 22.14 |
| 468 | 58.39 | 28.75 | 23.04 | 21.82 | 22.15 |
| 470 | 58.62 | 28.85 | 23.07 | 21.82 | 22.15 |
| 472 | 58.9  | 28.92 | 23.08 | 21.82 | 22.16 |
| 474 | 59.12 | 29.01 | 23.09 | 21.8  | 22.16 |
| 476 | 59.37 | 29.11 | 23.13 | 21.82 | 22.16 |
| 478 | 59.62 | 29.2  | 23.15 | 21.82 | 22.15 |
| 480 | 59.91 | 29.29 | 23.18 | 21.84 | 22.17 |
| 482 | 60.13 | 29.38 | 23.2  | 21.82 | 22.17 |
| 484 | 60.38 | 29.5  | 23.24 | 21.86 | 22.19 |
| 486 | 60.59 | 29.56 | 23.23 | 21.83 | 22.16 |
| 488 | 60.87 | 29.65 | 23.26 | 21.84 | 22.19 |
| 490 | 61.08 | 29.73 | 23.26 | 21.83 | 22.16 |
| 492 | 61.34 | 29.85 | 23.31 | 21.87 | 22.18 |
| 494 | 61.61 | 29.95 | 23.35 | 21.87 | 22.19 |
| 496 | 61.88 | 30.04 | 23.36 | 21.88 | 22.2  |
| 498 | 62.12 | 30.13 | 23.39 | 21.89 | 22.2  |
| 500 | 62.35 | 30.21 | 23.4  | 21.87 | 22.19 |
| 502 | 62.59 | 30.32 | 23.45 | 21.9  | 22.22 |
| 504 | 62.9  | 30.44 | 23.49 | 21.93 | 22.24 |
| 506 | 63.12 | 30.51 | 23.5  | 21.93 | 22.24 |
| 508 | 63.38 | 30.61 | 23.54 | 21.93 | 22.24 |
| 510 | 63.62 | 30.7  | 23.56 | 21.95 | 22.25 |
| 512 | 63.92 | 30.81 | 23.6  | 21.98 | 22.27 |
| 514 | 64.12 | 30.87 | 23.6  | 21.95 | 22.22 |
| 516 | 64.4  | 30.99 | 23.66 | 22    | 22.27 |
| 518 | 64.62 | 31.08 | 23.68 | 22    | 22.27 |
| 520 | 64.92 | 31.18 | 23.7  | 22.01 | 22.29 |
| 522 | 65.17 | 31.29 | 23.77 | 22.05 | 22.32 |
| 524 | 65.41 | 31.37 | 23.78 | 22.04 | 22.31 |
| 526 | 65.65 | 31.47 | 23.8  | 22.04 | 22.31 |

|     |       |       |       |       |       |
|-----|-------|-------|-------|-------|-------|
| 528 | 65.96 | 31.58 | 23.84 | 22.05 | 22.33 |
| 530 | 66.18 | 31.66 | 23.86 | 22.06 | 22.33 |
| 532 | 66.42 | 31.74 | 23.88 | 22.06 | 22.33 |
| 534 | 66.66 | 31.82 | 23.92 | 22.07 | 22.34 |
| 536 | 66.96 | 31.96 | 23.95 | 22.1  | 22.36 |
| 538 | 67.18 | 32.03 | 23.98 | 22.11 | 22.36 |
| 540 | 67.42 | 32.11 | 24    | 22.11 | 22.35 |
| 542 | 67.7  | 32.23 | 24.06 | 22.15 | 22.39 |
| 544 | 67.96 | 32.31 | 24.06 | 22.15 | 22.37 |
| 546 | 68.24 | 32.43 | 24.13 | 22.2  | 22.41 |
| 548 | 68.49 | 32.54 | 24.17 | 22.22 | 22.43 |
| 550 | 68.71 | 32.62 | 24.19 | 22.21 | 22.43 |
| 552 | 68.96 | 32.71 | 24.22 | 22.23 | 22.44 |
| 554 | 69.23 | 32.78 | 24.22 | 22.21 | 22.41 |
| 556 | 69.52 | 32.9  | 24.29 | 22.25 | 22.47 |
| 558 | 69.72 | 32.97 | 24.28 | 22.22 | 22.44 |
| 560 | 69.95 | 33.07 | 24.32 | 22.24 | 22.45 |
| 562 | 70.26 | 33.17 | 24.36 | 22.26 | 22.46 |
| 564 | 70.49 | 33.24 | 24.37 | 22.25 | 22.45 |
| 566 | 70.73 | 33.33 | 24.4  | 22.26 | 22.45 |
| 568 | 70.96 | 33.42 | 24.43 | 22.27 | 22.46 |
| 570 | 71.26 | 33.53 | 24.45 | 22.28 | 22.47 |
| 572 | 71.5  | 33.61 | 24.49 | 22.3  | 22.48 |
| 574 | 71.75 | 33.7  | 24.52 | 22.32 | 22.48 |
| 576 | 72.02 | 33.8  | 24.56 | 22.35 | 22.49 |
| 578 | 72.3  | 33.92 | 24.61 | 22.39 | 22.53 |
| 580 | 72.57 | 34.03 | 24.67 | 22.41 | 22.54 |
| 582 | 72.81 | 34.13 | 24.7  | 22.43 | 22.56 |
| 584 | 73.04 | 34.2  | 24.71 | 22.41 | 22.54 |
| 586 | 73.36 | 34.33 | 24.76 | 22.45 | 22.58 |
| 588 | 73.62 | 34.41 | 24.8  | 22.47 | 22.58 |
| 590 | 73.86 | 34.52 | 24.85 | 22.49 | 22.59 |
| 592 | 74.1  | 34.59 | 24.87 | 22.5  | 22.6  |
| 594 | 74.36 | 34.67 | 24.89 | 22.49 | 22.6  |
| 596 | 74.61 | 34.76 | 24.91 | 22.49 | 22.6  |
| 598 | 74.85 | 34.84 | 24.95 | 22.51 | 22.62 |
| 600 | 75.1  | 34.93 | 24.98 | 22.52 | 22.63 |
| 602 | 75.38 | 35.01 | 25.01 | 22.53 | 22.62 |
| 604 | 75.6  | 35.07 | 25.02 | 22.51 | 22.6  |
| 606 | 75.85 | 35.17 | 25.05 | 22.53 | 22.6  |
| 608 | 76.11 | 35.26 | 25.09 | 22.55 | 22.61 |
| 610 | 76.41 | 35.37 | 25.12 | 22.58 | 22.62 |
| 612 | 76.65 | 35.45 | 25.17 | 22.61 | 22.63 |
| 614 | 76.91 | 35.54 | 25.22 | 22.63 | 22.65 |

|     |       |       |       |       |       |
|-----|-------|-------|-------|-------|-------|
| 616 | 77.13 | 35.61 | 25.22 | 22.62 | 22.65 |
| 618 | 77.42 | 35.72 | 25.26 | 22.64 | 22.66 |
| 620 | 77.67 | 35.8  | 25.28 | 22.66 | 22.66 |
| 622 | 77.91 | 35.88 | 25.32 | 22.68 | 22.67 |
| 624 | 78.16 | 35.96 | 25.36 | 22.69 | 22.68 |
| 626 | 78.45 | 36.05 | 25.38 | 22.69 | 22.69 |
| 628 | 78.7  | 36.13 | 25.42 | 22.7  | 22.69 |
| 630 | 78.93 | 36.21 | 25.45 | 22.7  | 22.68 |
| 632 | 79.19 | 36.3  | 25.48 | 22.73 | 22.7  |
| 634 | 79.47 | 36.39 | 25.51 | 22.73 | 22.7  |
| 636 | 79.73 | 36.48 | 25.55 | 22.75 | 22.7  |
| 638 | 79.97 | 36.54 | 25.59 | 22.78 | 22.73 |
| 640 | 80.25 | 36.65 | 25.63 | 22.8  | 22.74 |
| 642 | 80.53 | 36.74 | 25.66 | 22.81 | 22.75 |
| 644 | 80.79 | 36.84 | 25.71 | 22.84 | 22.77 |
| 646 | 81.02 | 36.9  | 25.72 | 22.82 | 22.75 |
| 648 | 81.28 | 36.99 | 25.77 | 22.86 | 22.77 |
| 650 | 81.58 | 37.08 | 25.8  | 22.87 | 22.79 |
| 652 | 81.84 | 37.16 | 25.85 | 22.9  | 22.8  |
| 654 | 82.09 | 37.25 | 25.87 | 22.91 | 22.79 |
| 656 | 82.34 | 37.31 | 25.9  | 22.91 | 22.79 |
| 658 | 82.65 | 37.42 | 25.96 | 22.96 | 22.83 |
| 660 | 82.91 | 37.5  | 26    | 22.98 | 22.84 |
| 662 | 83.17 | 37.57 | 26.04 | 23    | 22.85 |
| 664 | 83.41 | 37.66 | 26.08 | 23.02 | 22.86 |
| 666 | 83.67 | 37.72 | 26.08 | 23    | 22.83 |
| 668 | 83.95 | 37.82 | 26.16 | 23.05 | 22.87 |
| 670 | 84.2  | 37.9  | 26.19 | 23.07 | 22.88 |
| 672 | 84.46 | 37.97 | 26.22 | 23.07 | 22.89 |
| 674 | 84.81 | 38.1  | 26.29 | 23.11 | 22.92 |
| 676 | 85.08 | 38.19 | 26.35 | 23.15 | 22.96 |
| 678 | 85.32 | 38.26 | 26.37 | 23.16 | 22.96 |
| 680 | 85.58 | 38.3  | 26.38 | 23.15 | 22.94 |
| 682 | 85.85 | 38.43 | 26.45 | 23.18 | 22.96 |
| 684 | 86.08 | 38.49 | 26.46 | 23.2  | 22.98 |
| 686 | 86.34 | 38.54 | 26.48 | 23.19 | 22.97 |
| 688 | 86.66 | 38.62 | 26.54 | 23.23 | 22.99 |
| 690 | 86.95 | 38.74 | 26.61 | 23.27 | 23.02 |
| 692 | 87.2  | 38.81 | 26.64 | 23.29 | 23.01 |
| 694 | 87.47 | 38.9  | 26.68 | 23.3  | 23.02 |
| 696 | 87.78 | 38.98 | 26.73 | 23.33 | 23.05 |
| 698 | 88.02 | 39.04 | 26.75 | 23.33 | 23.04 |
| 700 | 88.31 | 39.15 | 26.83 | 23.39 | 23.08 |
| 702 | 88.57 | 39.23 | 26.87 | 23.42 | 23.09 |



|     |        |       |       |       |       |
|-----|--------|-------|-------|-------|-------|
| 704 | 88.86  | 39.29 | 26.89 | 23.42 | 23.07 |
| 706 | 89.11  | 39.36 | 26.93 | 23.43 | 23.09 |
| 708 | 89.39  | 39.45 | 26.98 | 23.47 | 23.13 |
| 710 | 89.61  | 39.47 | 26.96 | 23.42 | 23.08 |
| 712 | 89.91  | 39.56 | 27.01 | 23.44 | 23.1  |
| 714 | 90.15  | 39.65 | 27.07 | 23.47 | 23.1  |
| 716 | 90.46  | 39.76 | 27.13 | 23.52 | 23.15 |
| 718 | 90.7   | 39.8  | 27.14 | 23.51 | 23.14 |
| 720 | 91.02  | 39.87 | 27.18 | 23.54 | 23.16 |
| 722 | 91.3   | 39.96 | 27.24 | 23.57 | 23.18 |
| 724 | 91.56  | 40.03 | 27.27 | 23.59 | 23.17 |
| 726 | 91.84  | 40.12 | 27.32 | 23.62 | 23.2  |
| 728 | 92.16  | 40.19 | 27.36 | 23.65 | 23.22 |
| 730 | 92.42  | 40.26 | 27.4  | 23.65 | 23.21 |
| 732 | 92.69  | 40.33 | 27.44 | 23.69 | 23.23 |
| 734 | 92.95  | 40.41 | 27.48 | 23.7  | 23.25 |
| 736 | 93.25  | 40.49 | 27.51 | 23.73 | 23.25 |
| 738 | 93.51  | 40.56 | 27.55 | 23.75 | 23.26 |
| 740 | 93.78  | 40.62 | 27.59 | 23.76 | 23.28 |
| 742 | 94.06  | 40.7  | 27.63 | 23.78 | 23.3  |
| 744 | 94.37  | 40.76 | 27.67 | 23.79 | 23.3  |
| 746 | 94.62  | 40.83 | 27.71 | 23.79 | 23.3  |
| 748 | 94.88  | 40.89 | 27.72 | 23.8  | 23.31 |
| 750 | 95.13  | 40.93 | 27.74 | 23.8  | 23.3  |
| 752 | 95.45  | 41.02 | 27.79 | 23.82 | 23.3  |
| 754 | 95.68  | 41.05 | 27.79 | 23.8  | 23.28 |
| 756 | 95.95  | 41.11 | 27.83 | 23.83 | 23.29 |
| 758 | 96.23  | 41.18 | 27.88 | 23.86 | 23.3  |
| 760 | 96.55  | 41.25 | 27.91 | 23.88 | 23.31 |
| 762 | 96.83  | 41.32 | 27.95 | 23.91 | 23.33 |
| 764 | 97.12  | 41.41 | 28.01 | 23.95 | 23.36 |
| 766 | 97.4   | 41.47 | 28.05 | 23.96 | 23.38 |
| 768 | 97.7   | 41.52 | 28.06 | 23.97 | 23.36 |
| 770 | 97.97  | 41.6  | 28.11 | 23.99 | 23.36 |
| 772 | 98.24  | 41.66 | 28.15 | 24    | 23.36 |
| 774 | 98.48  | 41.69 | 28.15 | 24    | 23.36 |
| 776 | 98.82  | 41.79 | 28.21 | 24.04 | 23.39 |
| 778 | 99.09  | 41.85 | 28.25 | 24.04 | 23.4  |
| 780 | 99.39  | 41.93 | 28.31 | 24.08 | 23.43 |
| 782 | 99.69  | 42.02 | 28.36 | 24.12 | 23.48 |
| 784 | 99.99  | 42.06 | 28.38 | 24.12 | 23.46 |
| 786 | 100.28 | 42.15 | 28.44 | 24.14 | 23.48 |
| 788 | 100.53 | 42.19 | 28.46 | 24.14 | 23.47 |
| 790 | 100.82 | 42.29 | 28.51 | 24.19 | 23.5  |

|     |        |       |       |       |       |
|-----|--------|-------|-------|-------|-------|
| 792 | 101.15 | 42.35 | 28.56 | 24.23 | 23.51 |
| 794 | 101.45 | 42.42 | 28.61 | 24.24 | 23.54 |
| 796 | 101.74 | 42.49 | 28.65 | 24.28 | 23.55 |
| 798 | 102.03 | 42.55 | 28.69 | 24.29 | 23.57 |
| 800 | 102.28 | 42.57 | 28.7  | 24.3  | 23.57 |
| 802 | 102.59 | 42.62 | 28.71 | 24.28 | 23.54 |
| 804 | 102.88 | 42.7  | 28.77 | 24.32 | 23.57 |
| 806 | 103.15 | 42.74 | 28.78 | 24.31 | 23.55 |
| 808 | 103.46 | 42.84 | 28.86 | 24.37 | 23.6  |
| 810 | 103.74 | 42.86 | 28.86 | 24.36 | 23.58 |
| 812 | 104.06 | 42.97 | 28.93 | 24.41 | 23.61 |
| 814 | 104.33 | 43.01 | 28.96 | 24.43 | 23.6  |
| 816 | 104.65 | 43.09 | 29.03 | 24.48 | 23.64 |
| 818 | 105    | 43.18 | 29.07 | 24.51 | 23.67 |
| 820 | 105.29 | 43.23 | 29.11 | 24.52 | 23.68 |
| 822 | 105.57 | 43.28 | 29.16 | 24.54 | 23.69 |
| 824 | 105.85 | 43.33 | 29.19 | 24.55 | 23.68 |
| 826 | 106.16 | 43.38 | 29.21 | 24.56 | 23.68 |
| 828 | 106.47 | 43.47 | 29.27 | 24.6  | 23.71 |
| 830 | 106.74 | 43.51 | 29.31 | 24.61 | 23.72 |
| 832 | 107.03 | 43.56 | 29.34 | 24.62 | 23.72 |
| 834 | 107.37 | 43.62 | 29.37 | 24.63 | 23.73 |
| 836 | 107.66 | 43.69 | 29.43 | 24.66 | 23.76 |
| 838 | 107.93 | 43.73 | 29.46 | 24.68 | 23.75 |
| 840 | 108.23 | 43.79 | 29.5  | 24.7  | 23.78 |
| 842 | 108.55 | 43.84 | 29.51 | 24.71 | 23.77 |
| 844 | 108.84 | 43.9  | 29.55 | 24.72 | 23.77 |
| 846 | 109.15 | 43.97 | 29.61 | 24.76 | 23.8  |
| 848 | 109.43 | 44.02 | 29.66 | 24.78 | 23.81 |
| 850 | 109.79 | 44.1  | 29.71 | 24.82 | 23.83 |
| 852 | 110.1  | 44.16 | 29.77 | 24.88 | 23.86 |
| 854 | 110.38 | 44.2  | 29.81 | 24.89 | 23.87 |
| 856 | 110.68 | 44.25 | 29.82 | 24.89 | 23.88 |
| 858 | 111.02 | 44.3  | 29.86 | 24.91 | 23.87 |
| 860 | 111.3  | 44.37 | 29.92 | 24.94 | 23.89 |
| 862 | 111.61 | 44.42 | 29.95 | 24.95 | 23.92 |
| 864 | 111.88 | 44.45 | 29.96 | 24.95 | 23.91 |
| 866 | 112.22 | 44.51 | 30.01 | 24.97 | 23.92 |
| 868 | 112.5  | 44.57 | 30.05 | 24.99 | 23.93 |
| 870 | 112.8  | 44.62 | 30.08 | 25    | 23.94 |
| 872 | 113.09 | 44.66 | 30.12 | 25.02 | 23.95 |
| 874 | 113.42 | 44.73 | 30.17 | 25.03 | 23.96 |
| 876 | 113.71 | 44.78 | 30.2  | 25.06 | 23.97 |
| 878 | 114    | 44.81 | 30.22 | 25.08 | 23.97 |

|     |        |       |       |       |       |
|-----|--------|-------|-------|-------|-------|
| 880 | 114.33 | 44.88 | 30.29 | 25.11 | 23.99 |
| 882 | 114.67 | 44.94 | 30.33 | 25.14 | 24.01 |
| 884 | 114.96 | 44.97 | 30.36 | 25.14 | 24    |
| 886 | 115.22 | 44.99 | 30.35 | 25.13 | 23.98 |
| 888 | 115.57 | 45.08 | 30.44 | 25.19 | 24.04 |
| 890 | 115.92 | 45.14 | 30.48 | 25.22 | 24.06 |
| 892 | 116.17 | 45.13 | 30.46 | 25.19 | 24.01 |
| 894 | 116.48 | 45.18 | 30.51 | 25.21 | 24.02 |
| 896 | 116.82 | 45.27 | 30.59 | 25.27 | 24.08 |
| 898 | 117.16 | 45.33 | 30.62 | 25.29 | 24.1  |
| 900 | 117.46 | 45.38 | 30.67 | 25.31 | 24.11 |
| 902 | 117.76 | 45.42 | 30.7  | 25.32 | 24.12 |
| 904 | 118.07 | 45.47 | 30.74 | 25.34 | 24.13 |
| 906 | 118.41 | 45.51 | 30.76 | 25.35 | 24.13 |
| 908 | 118.73 | 45.58 | 30.83 | 25.39 | 24.16 |
| 910 | 119.03 | 45.62 | 30.86 | 25.4  | 24.18 |
| 912 | 119.33 | 45.66 | 30.9  | 25.42 | 24.18 |
| 914 | 119.67 | 45.71 | 30.92 | 25.43 | 24.18 |
| 916 | 119.97 | 45.75 | 30.96 | 25.45 | 24.18 |
| 918 | 120.28 | 45.79 | 31    | 25.47 | 24.21 |
| 920 | 120.65 | 45.85 | 31.05 | 25.5  | 24.23 |
| 922 | 120.97 | 45.91 | 31.09 | 25.52 | 24.24 |
| 924 | 121.28 | 45.95 | 31.13 | 25.54 | 24.26 |
| 926 | 121.54 | 45.95 | 31.12 | 25.52 | 24.22 |
| 928 | 121.92 | 46.01 | 31.18 | 25.55 | 24.25 |
| 930 | 122.22 | 46.08 | 31.23 | 25.59 | 24.28 |
| 932 | 122.54 | 46.12 | 31.27 | 25.6  | 24.28 |
| 934 | 122.85 | 46.18 | 31.31 | 25.64 | 24.31 |
| 936 | 123.22 | 46.22 | 31.37 | 25.66 | 24.33 |
| 938 | 123.54 | 46.28 | 31.41 | 25.68 | 24.34 |
| 940 | 123.86 | 46.33 | 31.44 | 25.71 | 24.35 |
| 942 | 124.14 | 46.32 | 31.44 | 25.69 | 24.32 |
| 944 | 124.54 | 46.39 | 31.5  | 25.73 | 24.36 |
| 946 | 124.88 | 46.45 | 31.56 | 25.76 | 24.39 |
| 948 | 125.19 | 46.5  | 31.61 | 25.79 | 24.39 |
| 950 | 125.51 | 46.54 | 31.65 | 25.82 | 24.41 |
| 952 | 125.87 | 46.58 | 31.68 | 25.84 | 24.42 |
| 954 | 126.18 | 46.63 | 31.72 | 25.87 | 24.43 |
| 956 | 126.49 | 46.68 | 31.76 | 25.89 | 24.45 |
| 958 | 126.81 | 46.71 | 31.8  | 25.91 | 24.46 |
| 960 | 127.19 | 46.76 | 31.84 | 25.93 | 24.47 |
| 962 | 127.5  | 46.8  | 31.87 | 25.94 | 24.48 |
| 964 | 127.83 | 46.84 | 31.91 | 25.96 | 24.5  |
| 966 | 128.12 | 46.88 | 31.94 | 25.97 | 24.5  |

|      |        |       |       |       |       |
|------|--------|-------|-------|-------|-------|
| 968  | 128.49 | 46.91 | 31.98 | 25.98 | 24.51 |
| 970  | 128.81 | 46.96 | 32.02 | 26.01 | 24.52 |
| 972  | 129.14 | 47.02 | 32.07 | 26.04 | 24.54 |
| 974  | 129.46 | 47.04 | 32.09 | 26.04 | 24.55 |
| 976  | 129.84 | 47.13 | 32.18 | 26.11 | 24.61 |
| 978  | 130.23 | 47.19 | 32.24 | 26.15 | 24.64 |
| 980  | 130.54 | 47.22 | 32.27 | 26.17 | 24.64 |
| 982  | 130.84 | 47.22 | 32.28 | 26.17 | 24.63 |
| 984  | 131.23 | 47.27 | 32.34 | 26.22 | 24.67 |
| 986  | 131.57 | 47.34 | 32.39 | 26.25 | 24.69 |
| 988  | 131.86 | 47.36 | 32.41 | 26.25 | 24.68 |
| 990  | 132.17 | 47.41 | 32.45 | 26.29 | 24.69 |
| 992  | 132.55 | 47.43 | 32.46 | 26.29 | 24.7  |
| 994  | 132.88 | 47.46 | 32.49 | 26.3  | 24.69 |
| 996  | 133.2  | 47.48 | 32.52 | 26.3  | 24.69 |
| 998  | 133.51 | 47.51 | 32.54 | 26.3  | 24.69 |
| 1000 | 133.9  | 47.54 | 32.59 | 26.33 | 24.72 |
| 1002 | 134.2  | 47.58 | 32.62 | 26.34 | 24.7  |
| 1004 | 134.52 | 47.63 | 32.66 | 26.36 | 24.73 |
| 1006 | 134.83 | 47.66 | 32.7  | 26.38 | 24.74 |
| 1008 | 135.24 | 47.71 | 32.74 | 26.42 | 24.78 |
| 1010 | 135.6  | 47.77 | 32.79 | 26.45 | 24.8  |
| 1012 | 135.93 | 47.8  | 32.82 | 26.46 | 24.79 |
| 1014 | 136.25 | 47.81 | 32.83 | 26.46 | 24.79 |
| 1016 | 136.62 | 47.85 | 32.87 | 26.48 | 24.8  |
| 1018 | 136.93 | 47.87 | 32.9  | 26.48 | 24.78 |
| 1020 | 137.28 | 47.93 | 32.94 | 26.52 | 24.81 |
| 1022 | 137.64 | 47.98 | 32.99 | 26.55 | 24.84 |
| 1024 | 138    | 48    | 33.01 | 26.56 | 24.85 |
| 1026 | 138.32 | 48.03 | 33.06 | 26.58 | 24.86 |
| 1028 | 138.67 | 48.09 | 33.12 | 26.61 | 24.88 |
| 1030 | 139    | 48.11 | 33.14 | 26.64 | 24.89 |
| 1032 | 139.39 | 48.14 | 33.17 | 26.67 | 24.89 |
| 1034 | 139.76 | 48.23 | 33.24 | 26.7  | 24.94 |
| 1036 | 140.09 | 48.24 | 33.27 | 26.71 | 24.94 |
| 1038 | 140.41 | 48.27 | 33.29 | 26.73 | 24.95 |
| 1040 | 140.75 | 48.31 | 33.33 | 26.75 | 24.96 |
| 1042 | 141.18 | 48.39 | 33.41 | 26.81 | 25    |
| 1044 | 141.48 | 48.39 | 33.42 | 26.79 | 24.99 |
| 1046 | 141.84 | 48.46 | 33.48 | 26.84 | 25.03 |
| 1048 | 142.15 | 48.46 | 33.48 | 26.82 | 25.01 |
| 1050 | 142.57 | 48.52 | 33.53 | 26.86 | 25.04 |
| 1052 | 142.89 | 48.54 | 33.56 | 26.86 | 25.02 |
| 1054 | 143.22 | 48.56 | 33.59 | 26.87 | 25.03 |

|      |        |       |       |       |       |
|------|--------|-------|-------|-------|-------|
| 1056 | 143.58 | 48.61 | 33.64 | 26.9  | 25.06 |
| 1058 | 143.97 | 48.65 | 33.66 | 26.92 | 25.07 |
| 1060 | 144.28 | 48.67 | 33.69 | 26.93 | 25.07 |
| 1062 | 144.63 | 48.71 | 33.74 | 26.96 | 25.08 |
| 1064 | 144.96 | 48.76 | 33.78 | 27.01 | 25.11 |
| 1066 | 145.36 | 48.79 | 33.8  | 27.02 | 25.13 |
| 1068 | 145.73 | 48.86 | 33.87 | 27.06 | 25.14 |
| 1070 | 146.06 | 48.88 | 33.9  | 27.07 | 25.15 |
| 1072 | 146.42 | 48.91 | 33.93 | 27.09 | 25.17 |
| 1074 | 146.82 | 48.94 | 33.98 | 27.11 | 25.16 |
| 1076 | 147.16 | 48.97 | 34.01 | 27.11 | 25.17 |
| 1078 | 147.47 | 49.01 | 34.03 | 27.13 | 25.18 |
| 1080 | 147.84 | 49.03 | 34.04 | 27.13 | 25.18 |
| 1082 | 148.22 | 49.1  | 34.12 | 27.19 | 25.23 |
| 1084 | 148.54 | 49.11 | 34.12 | 27.18 | 25.21 |
| 1086 | 148.93 | 49.18 | 34.18 | 27.24 | 25.26 |
| 1088 | 149.3  | 49.17 | 34.2  | 27.23 | 25.23 |
| 1090 | 149.67 | 49.24 | 34.26 | 27.27 | 25.26 |
| 1092 | 149.99 | 49.27 | 34.28 | 27.26 | 25.26 |
| 1094 | 150.34 | 49.3  | 34.33 | 27.31 | 25.29 |
| 1096 | 150.76 | 49.37 | 34.38 | 27.35 | 25.32 |
| 1098 | 151.06 | 49.36 | 34.37 | 27.32 | 25.28 |
| 1100 | 151.43 | 49.42 | 34.42 | 27.36 | 25.31 |
| 1102 | 151.79 | 49.46 | 34.47 | 27.39 | 25.33 |
| 1104 | 152.12 | 49.48 | 34.47 | 27.37 | 25.32 |
| 1106 | 152.53 | 49.54 | 34.52 | 27.41 | 25.35 |
| 1108 | 152.87 | 49.56 | 34.56 | 27.42 | 25.35 |
| 1110 | 153.26 | 49.63 | 34.62 | 27.45 | 25.39 |
| 1112 | 153.61 | 49.66 | 34.65 | 27.48 | 25.42 |
| 1114 | 154.01 | 49.68 | 34.67 | 27.48 | 25.4  |
| 1116 | 154.37 | 49.73 | 34.71 | 27.51 | 25.42 |
| 1118 | 154.7  | 49.74 | 34.72 | 27.52 | 25.43 |
| 1120 | 155.04 | 49.77 | 34.74 | 27.52 | 25.42 |
| 1122 | 155.46 | 49.84 | 34.81 | 27.57 | 25.46 |
| 1124 | 155.77 | 49.83 | 34.81 | 27.56 | 25.44 |
| 1126 | 156.12 | 49.87 | 34.85 | 27.59 | 25.46 |
| 1128 | 156.5  | 49.92 | 34.91 | 27.64 | 25.48 |
| 1130 | 156.95 | 50    | 34.97 | 27.67 | 25.53 |
| 1132 | 157.3  | 50.04 | 35.01 | 27.71 | 25.55 |
| 1134 | 157.61 | 50.02 | 34.99 | 27.67 | 25.51 |
| 1136 | 157.99 | 50.09 | 35.06 | 27.71 | 25.55 |
| 1138 | 158.41 | 50.15 | 35.11 | 27.75 | 25.58 |
| 1140 | 158.75 | 50.17 | 35.14 | 27.74 | 25.58 |
| 1142 | 159.06 | 50.16 | 35.12 | 27.72 | 25.55 |

|      |        |       |       |       |       |
|------|--------|-------|-------|-------|-------|
| 1144 | 159.43 | 50.2  | 35.15 | 27.75 | 25.57 |
| 1146 | 159.84 | 50.23 | 35.18 | 27.76 | 25.57 |
| 1148 | 160.2  | 50.26 | 35.21 | 27.77 | 25.58 |
| 1150 | 160.53 | 50.27 | 35.23 | 27.76 | 25.56 |
| 1152 | 160.9  | 50.33 | 35.27 | 27.8  | 25.59 |
| 1154 | 161.31 | 50.36 | 35.32 | 27.84 | 25.62 |
| 1156 | 161.67 | 50.4  | 35.36 | 27.86 | 25.62 |
| 1158 | 162.04 | 50.46 | 35.39 | 27.89 | 25.65 |
| 1160 | 162.38 | 50.46 | 35.41 | 27.89 | 25.64 |
| 1162 | 162.83 | 50.54 | 35.47 | 27.93 | 25.67 |
| 1164 | 163.18 | 50.56 | 35.49 | 27.93 | 25.67 |
| 1166 | 163.54 | 50.6  | 35.54 | 27.97 | 25.69 |
| 1168 | 163.96 | 50.64 | 35.57 | 27.99 | 25.7  |
| 1170 | 164.34 | 50.7  | 35.63 | 28.04 | 25.74 |
| 1172 | 164.64 | 50.71 | 35.62 | 28.01 | 25.71 |
| 1174 | 164.99 | 50.74 | 35.65 | 28.02 | 25.71 |
| 1176 | 165.44 | 50.79 | 35.7  | 28.04 | 25.74 |
| 1178 | 165.81 | 50.84 | 35.73 | 28.06 | 25.76 |
| 1180 | 166.18 | 50.87 | 35.77 | 28.08 | 25.77 |
| 1182 | 166.54 | 50.91 | 35.8  | 28.11 | 25.78 |
| 1184 | 166.92 | 50.9  | 35.79 | 28.08 | 25.75 |
| 1186 | 167.29 | 50.96 | 35.84 | 28.11 | 25.76 |
| 1188 | 167.69 | 51.04 | 35.91 | 28.18 | 25.83 |
| 1190 | 168.03 | 51.06 | 35.94 | 28.19 | 25.83 |
| 1192 | 168.48 | 51.12 | 36    | 28.23 | 25.87 |
| 1194 | 168.83 | 51.14 | 36.01 | 28.24 | 25.86 |
| 1196 | 169.2  | 51.17 | 36.05 | 28.27 | 25.87 |
| 1198 | 169.57 | 51.21 | 36.08 | 28.28 | 25.88 |
| 1200 | 169.99 | 51.25 | 36.12 | 28.3  | 25.89 |
| 1202 | 170.35 | 51.29 | 36.16 | 28.33 | 25.9  |
| 1204 | 170.72 | 51.33 | 36.19 | 28.35 | 25.91 |
| 1206 | 171.08 | 51.36 | 36.23 | 28.37 | 25.92 |
| 1208 | 171.49 | 51.4  | 36.26 | 28.39 | 25.93 |
| 1210 | 171.86 | 51.44 | 36.29 | 28.4  | 25.95 |
| 1212 | 172.25 | 51.48 | 36.32 | 28.42 | 25.96 |
| 1214 | 172.63 | 51.51 | 36.36 | 28.45 | 25.98 |
| 1216 | 173.09 | 51.56 | 36.41 | 28.48 | 26    |
| 1218 | 173.43 | 51.58 | 36.42 | 28.46 | 25.97 |
| 1220 | 173.79 | 51.63 | 36.47 | 28.5  | 26.01 |
| 1222 | 174.15 | 51.66 | 36.49 | 28.51 | 26.01 |
| 1224 | 174.57 | 51.69 | 36.52 | 28.52 | 26.02 |
| 1226 | 174.96 | 51.75 | 36.57 | 28.56 | 26.07 |
| 1228 | 175.33 | 51.78 | 36.6  | 28.58 | 26.05 |
| 1230 | 175.75 | 51.87 | 36.68 | 28.65 | 26.12 |

|      |        |       |       |       |       |
|------|--------|-------|-------|-------|-------|
| 1232 | 176.15 | 51.88 | 36.68 | 28.63 | 26.08 |
| 1234 | 176.55 | 51.95 | 36.76 | 28.67 | 26.13 |
| 1236 | 176.91 | 51.99 | 36.79 | 28.69 | 26.16 |
| 1238 | 177.26 | 52.03 | 36.82 | 28.71 | 26.16 |
| 1240 | 177.67 | 52.05 | 36.84 | 28.72 | 26.17 |
| 1242 | 178.07 | 52.11 | 36.89 | 28.74 | 26.19 |
| 1244 | 178.45 | 52.15 | 36.93 | 28.77 | 26.21 |
| 1246 | 178.81 | 52.17 | 36.95 | 28.78 | 26.21 |
| 1248 | 179.27 | 52.22 | 36.99 | 28.81 | 26.23 |
| 1250 | 179.64 | 52.27 | 37.03 | 28.85 | 26.24 |
| 1252 | 180.02 | 52.31 | 37.07 | 28.88 | 26.26 |
| 1254 | 180.39 | 52.35 | 37.11 | 28.9  | 26.27 |
| 1256 | 180.81 | 52.36 | 37.11 | 28.89 | 26.25 |
| 1258 | 181.13 | 52.38 | 37.12 | 28.88 | 26.23 |
| 1260 | 181.53 | 52.44 | 37.17 | 28.91 | 26.27 |
| 1262 | 181.96 | 52.51 | 37.24 | 28.97 | 26.31 |
| 1264 | 182.41 | 52.56 | 37.27 | 28.99 | 26.32 |
| 1266 | 182.75 | 52.58 | 37.29 | 28.97 | 26.3  |
| 1268 | 183.14 | 52.63 | 37.33 | 28.99 | 26.33 |
| 1270 | 183.52 | 52.68 | 37.37 | 29.03 | 26.36 |
| 1272 | 183.9  | 52.68 | 37.36 | 29.02 | 26.34 |
| 1274 | 184.29 | 52.74 | 37.41 | 29.06 | 26.36 |
| 1276 | 184.64 | 52.74 | 37.41 | 29.03 | 26.33 |
| 1278 | 185.05 | 52.8  | 37.46 | 29.06 | 26.35 |
| 1280 | 185.56 | 52.87 | 37.54 | 29.12 | 26.41 |
| 1282 | 185.95 | 52.93 | 37.58 | 29.15 | 26.42 |
| 1284 | 186.33 | 52.97 | 37.62 | 29.17 | 26.43 |
| 1286 | 186.69 | 53.01 | 37.64 | 29.18 | 26.42 |
| 1288 | 187.14 | 53.07 | 37.68 | 29.22 | 26.45 |
| 1290 | 187.51 | 53.08 | 37.71 | 29.22 | 26.46 |
| 1292 | 187.88 | 53.12 | 37.74 | 29.25 | 26.45 |
| 1294 | 188.24 | 53.14 | 37.75 | 29.25 | 26.44 |
| 1296 | 188.7  | 53.2  | 37.79 | 29.27 | 26.47 |
| 1298 | 189.1  | 53.25 | 37.85 | 29.3  | 26.5  |
| 1300 | 189.46 | 53.27 | 37.86 | 29.31 | 26.48 |
| 1302 | 189.83 | 53.29 | 37.87 | 29.32 | 26.48 |
| 1304 | 190.25 | 53.32 | 37.89 | 29.32 | 26.48 |
| 1306 | 190.67 | 53.4  | 37.97 | 29.36 | 26.54 |
| 1308 | 191.02 | 53.42 | 37.97 | 29.36 | 26.53 |
| 1310 | 191.39 | 53.46 | 38.01 | 29.39 | 26.52 |
| 1312 | 191.87 | 53.53 | 38.06 | 29.44 | 26.58 |
| 1314 | 192.25 | 53.56 | 38.09 | 29.44 | 26.56 |
| 1316 | 192.64 | 53.6  | 38.13 | 29.47 | 26.59 |
| 1318 | 193.06 | 53.69 | 38.21 | 29.52 | 26.63 |

|      |        |       |       |       |       |
|------|--------|-------|-------|-------|-------|
| 1320 | 193.51 | 53.73 | 38.23 | 29.54 | 26.63 |
| 1322 | 193.91 | 53.78 | 38.28 | 29.58 | 26.66 |
| 1324 | 194.28 | 53.8  | 38.31 | 29.6  | 26.66 |
| 1326 | 194.67 | 53.86 | 38.35 | 29.63 | 26.68 |
| 1328 | 195.09 | 53.88 | 38.34 | 29.6  | 26.67 |
| 1330 | 195.49 | 53.92 | 38.4  | 29.64 | 26.69 |
| 1332 | 195.87 | 53.96 | 38.43 | 29.66 | 26.7  |
| 1334 | 196.27 | 54.02 | 38.48 | 29.69 | 26.71 |
| 1336 | 196.72 | 54.06 | 38.52 | 29.72 | 26.73 |
| 1338 | 197.11 | 54.1  | 38.55 | 29.75 | 26.74 |
| 1340 | 197.45 | 54.1  | 38.54 | 29.72 | 26.71 |
| 1342 | 197.86 | 54.18 | 38.61 | 29.77 | 26.77 |
| 1344 | 198.27 | 54.23 | 38.66 | 29.81 | 26.8  |
| 1346 | 198.73 | 54.28 | 38.7  | 29.82 | 26.8  |
| 1348 | 199.13 | 54.31 | 38.73 | 29.85 | 26.82 |
| 1350 | 199.52 | 54.35 | 38.76 | 29.86 | 26.83 |
| 1352 | 199.91 | 54.39 | 38.79 | 29.87 | 26.85 |
| 1354 | 200.36 | 54.44 | 38.82 | 29.89 | 26.86 |
| 1356 | 200.74 | 54.48 | 38.86 | 29.92 | 26.87 |
| 1358 | 201.15 | 54.54 | 38.93 | 29.95 | 26.91 |
| 1360 | 201.53 | 54.56 | 38.94 | 29.96 | 26.9  |
| 1362 | 202    | 54.6  | 38.97 | 29.97 | 26.91 |
| 1364 | 202.41 | 54.66 | 39.02 | 30.02 | 26.93 |
| 1366 | 202.78 | 54.68 | 39.03 | 30    | 26.91 |
| 1368 | 203.15 | 54.72 | 39.06 | 30.03 | 26.93 |
| 1370 | 203.6  | 54.75 | 39.08 | 30.04 | 26.92 |
| 1372 | 204.01 | 54.81 | 39.14 | 30.08 | 26.96 |
| 1374 | 204.37 | 54.82 | 39.15 | 30.07 | 26.94 |
| 1376 | 204.76 | 54.85 | 39.18 | 30.07 | 26.94 |
| 1378 | 205.19 | 54.92 | 39.25 | 30.13 | 26.99 |
| 1380 | 205.64 | 54.95 | 39.27 | 30.14 | 26.98 |
| 1382 | 206.05 | 55.01 | 39.31 | 30.16 | 27    |
| 1384 | 206.41 | 55.03 | 39.33 | 30.18 | 27    |
| 1386 | 206.85 | 55.05 | 39.35 | 30.18 | 27    |
| 1388 | 207.25 | 55.1  | 39.41 | 30.22 | 27.03 |
| 1390 | 207.68 | 55.16 | 39.44 | 30.25 | 27.06 |
| 1392 | 208.09 | 55.22 | 39.49 | 30.28 | 27.08 |
| 1394 | 208.55 | 55.26 | 39.53 | 30.31 | 27.09 |
| 1396 | 208.93 | 55.29 | 39.56 | 30.33 | 27.09 |
| 1398 | 209.33 | 55.33 | 39.59 | 30.34 | 27.09 |
| 1400 | 209.73 | 55.38 | 39.63 | 30.38 | 27.1  |
| 1402 | 210.17 | 55.41 | 39.64 | 30.38 | 27.11 |
| 1404 | 210.58 | 55.48 | 39.71 | 30.43 | 27.14 |
| 1406 | 210.97 | 55.51 | 39.74 | 30.44 | 27.13 |



|      |        |       |       |       |       |
|------|--------|-------|-------|-------|-------|
| 1408 | 211.45 | 55.56 | 39.78 | 30.46 | 27.15 |
| 1410 | 211.84 | 55.58 | 39.8  | 30.44 | 27.14 |
| 1412 | 212.24 | 55.61 | 39.82 | 30.47 | 27.14 |
| 1414 | 212.66 | 55.67 | 39.86 | 30.5  | 27.16 |
| 1416 | 213.11 | 55.73 | 39.92 | 30.53 | 27.18 |
| 1418 | 213.49 | 55.75 | 39.94 | 30.54 | 27.19 |
| 1420 | 213.9  | 55.79 | 39.97 | 30.55 | 27.19 |
| 1422 | 214.32 | 55.85 | 40.02 | 30.58 | 27.22 |
| 1424 | 214.78 | 55.87 | 40.04 | 30.59 | 27.21 |
| 1426 | 215.21 | 55.95 | 40.11 | 30.63 | 27.24 |
| 1428 | 215.62 | 56    | 40.14 | 30.67 | 27.26 |
| 1430 | 216.01 | 56.04 | 40.18 | 30.7  | 27.27 |
| 1432 | 216.49 | 56.08 | 40.22 | 30.72 | 27.29 |
| 1434 | 216.86 | 56.09 | 40.22 | 30.7  | 27.26 |
| 1436 | 217.25 | 56.12 | 40.24 | 30.72 | 27.27 |
| 1438 | 217.66 | 56.18 | 40.29 | 30.75 | 27.29 |
| 1440 | 218.17 | 56.25 | 40.35 | 30.8  | 27.32 |
| 1442 | 218.58 | 56.3  | 40.4  | 30.82 | 27.33 |
| 1444 | 218.97 | 56.33 | 40.43 | 30.85 | 27.34 |
| 1446 | 219.37 | 56.37 | 40.46 | 30.86 | 27.36 |
| 1448 | 219.81 | 56.38 | 40.46 | 30.85 | 27.34 |
| 1450 | 220.24 | 56.45 | 40.52 | 30.88 | 27.36 |
| 1452 | 220.67 | 56.5  | 40.57 | 30.91 | 27.39 |
| 1454 | 221.08 | 56.55 | 40.6  | 30.93 | 27.4  |
| 1456 | 221.56 | 56.58 | 40.64 | 30.95 | 27.41 |
| 1458 | 221.96 | 56.64 | 40.68 | 30.98 | 27.42 |
| 1460 | 222.34 | 56.67 | 40.7  | 30.99 | 27.42 |
| 1462 | 222.72 | 56.7  | 40.74 | 31.01 | 27.43 |
| 1464 | 223.2  | 56.73 | 40.75 | 31.01 | 27.42 |
| 1466 | 223.62 | 56.78 | 40.81 | 31.04 | 27.43 |
| 1468 | 224    | 56.79 | 40.82 | 31.05 | 27.43 |
| 1470 | 224.47 | 56.88 | 40.89 | 31.1  | 27.47 |
| 1472 | 224.91 | 56.87 | 40.89 | 31.09 | 27.44 |
| 1474 | 225.33 | 56.93 | 40.93 | 31.12 | 27.46 |
| 1476 | 225.76 | 56.99 | 41    | 31.18 | 27.5  |
| 1478 | 226.19 | 57.06 | 41.05 | 31.21 | 27.53 |
| 1480 | 226.67 | 57.1  | 41.09 | 31.23 | 27.54 |
| 1482 | 227.09 | 57.14 | 41.13 | 31.25 | 27.55 |
| 1484 | 227.5  | 57.16 | 41.15 | 31.25 | 27.54 |
| 1486 | 227.93 | 57.22 | 41.19 | 31.29 | 27.57 |
| 1488 | 228.43 | 57.28 | 41.24 | 31.31 | 27.59 |
| 1490 | 228.82 | 57.31 | 41.27 | 31.33 | 27.6  |
| 1492 | 229.23 | 57.36 | 41.31 | 31.37 | 27.63 |
| 1494 | 229.67 | 57.44 | 41.38 | 31.41 | 27.66 |

|      |        |       |       |       |       |
|------|--------|-------|-------|-------|-------|
| 1496 | 230.11 | 57.44 | 41.38 | 31.39 | 27.63 |
| 1498 | 230.52 | 57.46 | 41.39 | 31.38 | 27.61 |
| 1500 | 230.97 | 57.52 | 41.45 | 31.43 | 27.64 |
| 1502 | 231.39 | 57.55 | 41.48 | 31.45 | 27.65 |
| 1504 | 231.94 | 57.64 | 41.56 | 31.52 | 27.72 |
| 1506 | 232.3  | 57.64 | 41.57 | 31.53 | 27.69 |
| 1508 | 232.71 | 57.7  | 41.63 | 31.57 | 27.71 |
| 1510 | 233.11 | 57.73 | 41.63 | 31.56 | 27.69 |
| 1512 | 233.59 | 57.76 | 41.66 | 31.58 | 27.7  |
| 1514 | 234.03 | 57.81 | 41.72 | 31.59 | 27.72 |
| 1516 | 234.45 | 57.84 | 41.74 | 31.61 | 27.71 |
| 1518 | 234.87 | 57.88 | 41.78 | 31.63 | 27.72 |
| 1520 | 235.36 | 57.93 | 41.82 | 31.66 | 27.74 |
| 1522 | 235.76 | 57.98 | 41.85 | 31.67 | 27.75 |
| 1524 | 236.16 | 58.01 | 41.88 | 31.69 | 27.75 |
| 1526 | 236.6  | 58.06 | 41.92 | 31.71 | 27.76 |
| 1528 | 237.02 | 58.09 | 41.96 | 31.74 | 27.78 |
| 1530 | 237.52 | 58.15 | 41.99 | 31.75 | 27.8  |
| 1532 | 237.92 | 58.16 | 42    | 31.75 | 27.77 |
| 1534 | 238.34 | 58.21 | 42.05 | 31.78 | 27.78 |
| 1536 | 238.76 | 58.25 | 42.08 | 31.81 | 27.82 |
| 1538 | 239.26 | 58.31 | 42.13 | 31.84 | 27.82 |
| 1540 | 239.7  | 58.36 | 42.18 | 31.89 | 27.85 |
| 1542 | 240.12 | 58.4  | 42.22 | 31.91 | 27.87 |
| 1544 | 240.55 | 58.45 | 42.25 | 31.93 | 27.88 |
| 1546 | 241.05 | 58.5  | 42.28 | 31.95 | 27.89 |
| 1548 | 241.49 | 58.53 | 42.33 | 31.97 | 27.9  |
| 1550 | 241.91 | 58.57 | 42.37 | 31.99 | 27.9  |
| 1552 | 242.33 | 58.62 | 42.41 | 32.02 | 27.93 |
| 1554 | 242.81 | 58.66 | 42.44 | 32.04 | 27.92 |
| 1556 | 243.25 | 58.73 | 42.49 | 32.07 | 27.95 |
| 1558 | 243.7  | 58.78 | 42.54 | 32.1  | 27.99 |
| 1560 | 244.14 | 58.83 | 42.57 | 32.11 | 27.99 |
| 1562 | 244.6  | 58.84 | 42.58 | 32.11 | 27.97 |
| 1564 | 245.02 | 58.89 | 42.63 | 32.16 | 27.99 |
| 1566 | 245.43 | 58.94 | 42.66 | 32.17 | 28.01 |
| 1568 | 245.87 | 58.99 | 42.72 | 32.21 | 28.06 |
| 1570 | 246.34 | 59.02 | 42.74 | 32.24 | 28.06 |
| 1572 | 246.78 | 59.04 | 42.75 | 32.23 | 28.04 |
| 1574 | 247.25 | 59.12 | 42.83 | 32.3  | 28.08 |
| 1576 | 247.67 | 59.15 | 42.86 | 32.31 | 28.08 |
| 1578 | 248.08 | 59.18 | 42.87 | 32.32 | 28.07 |
| 1580 | 248.62 | 59.26 | 42.95 | 32.37 | 28.11 |
| 1582 | 249.01 | 59.27 | 42.96 | 32.37 | 28.13 |

|      |        |       |       |       |       |
|------|--------|-------|-------|-------|-------|
| 1584 | 249.42 | 59.3  | 42.97 | 32.37 | 28.12 |
| 1586 | 249.92 | 59.34 | 43.01 | 32.39 | 28.11 |
| 1588 | 250.36 | 59.38 | 43.05 | 32.43 | 28.13 |
| 1590 | 250.82 | 59.46 | 43.11 | 32.47 | 28.17 |
| 1592 | 251.23 | 59.48 | 43.13 | 32.48 | 28.18 |
| 1594 | 251.75 | 59.5  | 43.15 | 32.49 | 28.18 |
| 1596 | 252.15 | 59.54 | 43.18 | 32.51 | 28.18 |
| 1598 | 252.57 | 59.58 | 43.22 | 32.53 | 28.2  |
| 1600 | 252.97 | 59.63 | 43.25 | 32.55 | 28.2  |
| 1602 | 253.48 | 59.67 | 43.27 | 32.56 | 28.21 |
| 1604 | 253.94 | 59.73 | 43.33 | 32.6  | 28.23 |
| 1606 | 254.39 | 59.77 | 43.35 | 32.6  | 28.25 |
| 1608 | 254.85 | 59.83 | 43.4  | 32.63 | 28.27 |
| 1610 | 255.35 | 59.87 | 43.42 | 32.64 | 28.27 |
| 1612 | 255.78 | 59.93 | 43.48 | 32.69 | 28.31 |
| 1614 | 256.16 | 59.94 | 43.5  | 32.7  | 28.3  |
| 1616 | 256.63 | 60.02 | 43.56 | 32.74 | 28.33 |
| 1618 | 257.12 | 60.03 | 43.57 | 32.74 | 28.32 |
| 1620 | 257.57 | 60.1  | 43.63 | 32.78 | 28.34 |
| 1622 | 258.05 | 60.16 | 43.68 | 32.83 | 28.36 |
| 1624 | 258.44 | 60.15 | 43.65 | 32.79 | 28.32 |
| 1626 | 258.99 | 60.23 | 43.71 | 32.84 | 28.36 |
| 1628 | 259.42 | 60.28 | 43.77 | 32.88 | 28.38 |
| 1630 | 259.85 | 60.32 | 43.81 | 32.92 | 28.4  |
| 1632 | 260.26 | 60.34 | 43.82 | 32.9  | 28.39 |
| 1634 | 260.77 | 60.38 | 43.85 | 32.93 | 28.4  |
| 1636 | 261.23 | 60.45 | 43.92 | 32.97 | 28.44 |
| 1638 | 261.68 | 60.49 | 43.95 | 32.99 | 28.45 |
| 1640 | 262.09 | 60.52 | 43.95 | 32.97 | 28.43 |
| 1642 | 262.57 | 60.57 | 43.97 | 33    | 28.44 |
| 1644 | 263.01 | 60.64 | 44.05 | 33.05 | 28.48 |
| 1646 | 263.4  | 60.62 | 44.03 | 33.02 | 28.44 |
| 1648 | 263.87 | 60.69 | 44.1  | 33.08 | 28.48 |
| 1650 | 264.42 | 60.76 | 44.16 | 33.12 | 28.51 |
| 1652 | 264.86 | 60.78 | 44.17 | 33.13 | 28.49 |
| 1654 | 265.31 | 60.83 | 44.22 | 33.18 | 28.53 |
| 1656 | 265.84 | 60.88 | 44.26 | 33.2  | 28.55 |
| 1658 | 266.24 | 60.89 | 44.26 | 33.18 | 28.51 |
| 1660 | 266.68 | 60.95 | 44.31 | 33.23 | 28.53 |
| 1662 | 267.06 | 60.96 | 44.31 | 33.22 | 28.52 |
| 1664 | 267.58 | 61    | 44.33 | 33.22 | 28.53 |
| 1666 | 268.05 | 61.08 | 44.39 | 33.27 | 28.56 |
| 1668 | 268.47 | 61.1  | 44.41 | 33.27 | 28.57 |
| 1670 | 268.91 | 61.14 | 44.44 | 33.28 | 28.56 |

|      |        |       |       |       |       |
|------|--------|-------|-------|-------|-------|
| 1672 | 269.42 | 61.19 | 44.47 | 33.3  | 28.58 |
| 1674 | 269.84 | 61.23 | 44.51 | 33.32 | 28.59 |
| 1676 | 270.27 | 61.28 | 44.54 | 33.34 | 28.6  |
| 1678 | 270.74 | 61.33 | 44.59 | 33.38 | 28.63 |
| 1680 | 271.24 | 61.39 | 44.63 | 33.41 | 28.64 |
| 1682 | 271.68 | 61.43 | 44.66 | 33.43 | 28.64 |
| 1684 | 272.12 | 61.47 | 44.7  | 33.47 | 28.65 |
| 1686 | 272.55 | 61.51 | 44.72 | 33.48 | 28.67 |
| 1688 | 273.06 | 61.56 | 44.76 | 33.5  | 28.68 |
| 1690 | 273.52 | 61.63 | 44.82 | 33.53 | 28.7  |
| 1692 | 273.99 | 61.72 | 44.89 | 33.62 | 28.76 |
| 1694 | 274.42 | 61.77 | 44.92 | 33.65 | 28.78 |
| 1696 | 274.91 | 61.78 | 44.92 | 33.63 | 28.74 |
| 1698 | 275.36 | 61.83 | 44.98 | 33.66 | 28.76 |
| 1700 | 275.79 | 61.87 | 45.01 | 33.68 | 28.77 |
| 1702 | 276.22 | 61.9  | 45.02 | 33.7  | 28.78 |
| 1704 | 276.72 | 61.96 | 45.07 | 33.72 | 28.81 |
| 1706 | 277.14 | 62.04 | 45.12 | 33.77 | 28.83 |
| 1708 | 277.56 | 62.06 | 45.14 | 33.76 | 28.83 |
| 1710 | 278.02 | 62.13 | 45.18 | 33.79 | 28.86 |
| 1712 | 278.54 | 62.17 | 45.23 | 33.83 | 28.86 |
| 1714 | 278.95 | 62.19 | 45.22 | 33.81 | 28.83 |
| 1716 | 279.41 | 62.27 | 45.29 | 33.87 | 28.88 |
| 1718 | 279.84 | 62.31 | 45.31 | 33.88 | 28.88 |
| 1720 | 280.33 | 62.35 | 45.34 | 33.9  | 28.9  |
| 1722 | 280.76 | 62.39 | 45.36 | 33.91 | 28.9  |
| 1724 | 281.18 | 62.43 | 45.38 | 33.92 | 28.89 |
| 1726 | 281.64 | 62.49 | 45.43 | 33.96 | 28.91 |
| 1728 | 282.19 | 62.58 | 45.5  | 34.03 | 28.97 |
| 1730 | 282.6  | 62.6  | 45.51 | 34.02 | 28.96 |
| 1732 | 283.01 | 62.64 | 45.53 | 34.02 | 28.96 |
| 1734 | 283.47 | 62.72 | 45.6  | 34.08 | 29.01 |
| 1736 | 283.93 | 62.74 | 45.59 | 34.07 | 28.98 |
| 1738 | 284.4  | 62.83 | 45.65 | 34.09 | 29    |
| 1740 | 284.85 | 62.9  | 45.7  | 34.15 | 29.05 |
| 1742 | 285.31 | 62.96 | 45.74 | 34.18 | 29.07 |
| 1744 | 285.81 | 63.01 | 45.77 | 34.19 | 29.08 |
| 1746 | 286.23 | 63.08 | 45.8  | 34.2  | 29.09 |
| 1748 | 286.66 | 63.14 | 45.83 | 34.23 | 29.11 |
| 1750 | 287.08 | 63.2  | 45.87 | 34.26 | 29.12 |
| 1752 | 287.59 | 63.26 | 45.9  | 34.27 | 29.13 |
| 1754 | 288.04 | 63.32 | 45.94 | 34.3  | 29.14 |
| 1756 | 288.49 | 63.38 | 45.97 | 34.32 | 29.15 |
| 1758 | 288.94 | 63.44 | 46    | 34.34 | 29.17 |

|      |        |       |       |       |       |
|------|--------|-------|-------|-------|-------|
| 1760 | 289.44 | 63.5  | 46.03 | 34.36 | 29.18 |
| 1762 | 289.86 | 63.58 | 46.07 | 34.39 | 29.18 |
| 1764 | 290.29 | 63.64 | 46.11 | 34.42 | 29.2  |
| 1766 | 290.72 | 63.7  | 46.13 | 34.43 | 29.2  |
| 1768 | 291.23 | 63.76 | 46.16 | 34.46 | 29.22 |
| 1770 | 291.68 | 63.85 | 46.21 | 34.49 | 29.25 |
| 1772 | 292.12 | 63.92 | 46.24 | 34.52 | 29.26 |
| 1774 | 292.54 | 63.96 | 46.25 | 34.53 | 29.25 |
| 1776 | 292.97 | 64.02 | 46.28 | 34.54 | 29.25 |
| 1778 | 293.46 | 64.1  | 46.32 | 34.57 | 29.28 |
| 1780 | 293.91 | 64.19 | 46.37 | 34.61 | 29.31 |
| 1782 | 294.34 | 64.26 | 46.4  | 34.63 | 29.33 |
| 1784 | 294.77 | 64.32 | 46.43 | 34.64 | 29.32 |
| 1786 | 295.25 | 64.36 | 46.42 | 34.63 | 29.31 |
| 1788 | 295.67 | 64.44 | 46.46 | 34.66 | 29.31 |
| 1790 | 296.15 | 64.55 | 46.53 | 34.72 | 29.38 |
| 1792 | 296.66 | 64.63 | 46.56 | 34.74 | 29.39 |
| 1794 | 297.06 | 64.7  | 46.59 | 34.75 | 29.4  |
| 1796 | 297.49 | 64.79 | 46.63 | 34.78 | 29.41 |
| 1798 | 297.9  | 64.86 | 46.65 | 34.79 | 29.41 |
| 1800 | 298.42 | 64.96 | 46.68 | 34.81 | 29.43 |
| 1802 | 298.86 | 65.05 | 46.72 | 34.84 | 29.45 |
| 1804 | 299.28 | 65.14 | 46.75 | 34.86 | 29.47 |
| 1806 | 299.69 | 65.21 | 46.77 | 34.87 | 29.47 |
| 1808 | 300.1  | 65.31 | 46.8  | 34.9  | 29.49 |
| 1810 | 300.6  | 65.41 | 46.83 | 34.92 | 29.48 |
| 1812 | 301.04 | 65.51 | 46.88 | 34.95 | 29.51 |
| 1814 | 301.45 | 65.56 | 46.88 | 34.94 | 29.49 |
| 1816 | 301.97 | 65.7  | 46.91 | 34.99 | 29.51 |
| 1818 | 302.39 | 65.8  | 46.94 | 35.01 | 29.52 |
| 1820 | 302.82 | 65.92 | 46.99 | 35.04 | 29.54 |
| 1822 | 303.24 | 66.03 | 47.01 | 35.05 | 29.56 |
| 1824 | 303.76 | 66.17 | 47.06 | 35.1  | 29.6  |
| 1826 | 304.19 | 66.3  | 47.11 | 35.13 | 29.62 |
| 1828 | 304.62 | 66.41 | 47.14 | 35.16 | 29.63 |
| 1830 | 305.05 | 66.54 | 47.17 | 35.17 | 29.65 |
| 1832 | 305.47 | 66.65 | 47.18 | 35.17 | 29.64 |
| 1834 | 305.92 | 66.76 | 47.2  | 35.18 | 29.65 |
| 1836 | 306.36 | 66.91 | 47.24 | 35.22 | 29.68 |
| 1838 | 306.79 | 67.05 | 47.28 | 35.25 | 29.71 |
| 1840 | 307.22 | 67.18 | 47.31 | 35.28 | 29.73 |
| 1842 | 307.69 | 67.32 | 47.31 | 35.27 | 29.72 |
| 1844 | 308.15 | 67.48 | 47.37 | 35.32 | 29.76 |
| 1846 | 308.56 | 67.6  | 47.39 | 35.34 | 29.77 |

|      |        |       |       |       |       |
|------|--------|-------|-------|-------|-------|
| 1848 | 308.99 | 67.74 | 47.43 | 35.38 | 29.79 |
| 1850 | 309.48 | 67.91 | 47.46 | 35.42 | 29.8  |
| 1852 | 309.88 | 68.04 | 47.49 | 35.44 | 29.82 |
| 1854 | 310.28 | 68.18 | 47.51 | 35.46 | 29.82 |
| 1856 | 310.68 | 68.3  | 47.52 | 35.45 | 29.82 |
| 1858 | 311.21 | 68.49 | 47.56 | 35.5  | 29.85 |
| 1860 | 311.61 | 68.61 | 47.57 | 35.49 | 29.83 |
| 1862 | 312.03 | 68.77 | 47.6  | 35.52 | 29.84 |
| 1864 | 312.46 | 68.92 | 47.64 | 35.55 | 29.88 |
| 1866 | 312.93 | 69.09 | 47.65 | 35.55 | 29.87 |
| 1868 | 313.38 | 69.27 | 47.72 | 35.61 | 29.92 |
| 1870 | 313.79 | 69.44 | 47.75 | 35.64 | 29.93 |
| 1872 | 314.23 | 69.61 | 47.79 | 35.68 | 29.96 |
| 1874 | 314.75 | 69.8  | 47.81 | 35.69 | 29.97 |
| 1876 | 315.18 | 69.96 | 47.84 | 35.71 | 29.99 |
| 1878 | 315.6  | 70.12 | 47.87 | 35.74 | 30.01 |
| 1880 | 316.01 | 70.28 | 47.9  | 35.77 | 30.02 |
| 1882 | 316.5  | 70.49 | 47.94 | 35.81 | 30.04 |
| 1884 | 316.88 | 70.64 | 47.97 | 35.82 | 30.06 |
| 1886 | 317.3  | 70.81 | 48    | 35.85 | 30.08 |
| 1888 | 317.74 | 70.97 | 48.01 | 35.86 | 30.08 |
| 1890 | 318.25 | 71.16 | 48.03 | 35.87 | 30.09 |
| 1892 | 318.67 | 71.32 | 48.05 | 35.88 | 30.09 |
| 1894 | 319.07 | 71.51 | 48.09 | 35.92 | 30.12 |
| 1896 | 319.54 | 71.69 | 48.11 | 35.94 | 30.13 |
| 1898 | 319.95 | 71.92 | 48.16 | 35.98 | 30.16 |
| 1900 | 320.36 | 72.08 | 48.18 | 36    | 30.17 |
| 1902 | 320.79 | 72.26 | 48.22 | 36.04 | 30.2  |
| 1904 | 321.31 | 72.44 | 48.24 | 36.06 | 30.21 |
| 1906 | 321.74 | 72.66 | 48.28 | 36.09 | 30.22 |
| 1908 | 322.17 | 72.85 | 48.31 | 36.13 | 30.26 |
| 1910 | 322.55 | 73.01 | 48.32 | 36.12 | 30.24 |
| 1912 | 323.02 | 73.22 | 48.36 | 36.16 | 30.28 |
| 1914 | 323.43 | 73.45 | 48.4  | 36.19 | 30.29 |
| 1916 | 323.87 | 73.65 | 48.43 | 36.22 | 30.32 |
| 1918 | 324.32 | 73.86 | 48.48 | 36.27 | 30.36 |
| 1920 | 324.8  | 74.02 | 48.48 | 36.27 | 30.33 |
| 1922 | 325.22 | 74.24 | 48.51 | 36.27 | 30.35 |
| 1924 | 325.64 | 74.45 | 48.53 | 36.31 | 30.38 |
| 1926 | 326.01 | 74.62 | 48.53 | 36.32 | 30.38 |
| 1928 | 326.52 | 74.88 | 48.61 | 36.39 | 30.43 |
| 1930 | 326.91 | 75.1  | 48.64 | 36.4  | 30.44 |
| 1932 | 327.31 | 75.28 | 48.64 | 36.4  | 30.45 |
| 1934 | 327.77 | 75.52 | 48.69 | 36.46 | 30.48 |

|      |        |       |       |       |       |
|------|--------|-------|-------|-------|-------|
| 1936 | 328.24 | 75.7  | 48.69 | 36.46 | 30.47 |
| 1938 | 328.64 | 75.93 | 48.71 | 36.47 | 30.47 |
| 1940 | 329.08 | 76.18 | 48.77 | 36.52 | 30.53 |
| 1942 | 329.46 | 76.38 | 48.78 | 36.53 | 30.51 |
| 1944 | 329.93 | 76.59 | 48.81 | 36.57 | 30.53 |
| 1946 | 330.36 | 76.87 | 48.87 | 36.62 | 30.58 |
| 1948 | 330.78 | 77.06 | 48.87 | 36.62 | 30.57 |
| 1950 | 331.21 | 77.26 | 48.9  | 36.66 | 30.6  |
| 1952 | 331.71 | 77.51 | 48.95 | 36.7  | 30.64 |
| 1954 | 332.13 | 77.77 | 48.98 | 36.73 | 30.66 |
| 1956 | 332.52 | 77.99 | 49.01 | 36.75 | 30.68 |
| 1958 | 332.92 | 78.22 | 49.03 | 36.79 | 30.69 |
| 1960 | 333.38 | 78.45 | 49.06 | 36.81 | 30.71 |
| 1962 | 333.78 | 78.72 | 49.08 | 36.84 | 30.72 |
| 1964 | 334.2  | 78.95 | 49.11 | 36.86 | 30.75 |
| 1966 | 334.62 | 79.18 | 49.13 | 36.87 | 30.77 |
| 1968 | 335.1  | 79.41 | 49.16 | 36.89 | 30.78 |
| 1970 | 335.47 | 79.67 | 49.17 | 36.9  | 30.78 |
| 1972 | 335.88 | 79.92 | 49.21 | 36.94 | 30.81 |
| 1974 | 336.28 | 80.16 | 49.23 | 36.96 | 30.83 |
| 1976 | 336.76 | 80.4  | 49.26 | 36.98 | 30.84 |
| 1978 | 337.15 | 80.68 | 49.27 | 36.99 | 30.84 |
| 1980 | 337.54 | 80.91 | 49.26 | 36.99 | 30.85 |
| 1982 | 337.97 | 81.18 | 49.32 | 37.04 | 30.89 |
| 1984 | 338.42 | 81.4  | 49.33 | 37.05 | 30.88 |
| 1986 | 338.81 | 81.69 | 49.36 | 37.09 | 30.9  |
| 1988 | 339.21 | 81.91 | 49.37 | 37.1  | 30.91 |
| 1990 | 339.62 | 82.19 | 49.41 | 37.13 | 30.94 |
| 1992 | 340.07 | 82.42 | 49.4  | 37.13 | 30.92 |
| 1994 | 340.48 | 82.73 | 49.43 | 37.16 | 30.95 |
| 1996 | 340.93 | 83.04 | 49.5  | 37.23 | 31.01 |
| 1998 | 341.3  | 83.26 | 49.5  | 37.23 | 30.98 |
| 2000 | 341.75 | 83.52 | 49.53 | 37.27 | 31.02 |
| 2002 | 342.18 | 83.85 | 49.58 | 37.31 | 31.06 |
| 2004 | 342.56 | 84.11 | 49.59 | 37.34 | 31.07 |
| 2006 | 342.94 | 84.36 | 49.59 | 37.33 | 31.06 |
| 2008 | 343.43 | 84.65 | 49.64 | 37.37 | 31.1  |
| 2010 | 343.84 | 84.98 | 49.68 | 37.42 | 31.12 |
| 2012 | 344.22 | 85.22 | 49.69 | 37.43 | 31.13 |
| 2014 | 344.61 | 85.5  | 49.71 | 37.44 | 31.15 |
| 2016 | 345.08 | 85.79 | 49.74 | 37.48 | 31.16 |
| 2018 | 345.47 | 86.1  | 49.78 | 37.5  | 31.18 |
| 2020 | 345.87 | 86.38 | 49.8  | 37.52 | 31.19 |
| 2022 | 346.27 | 86.67 | 49.82 | 37.54 | 31.21 |

|      |        |        |       |       |       |
|------|--------|--------|-------|-------|-------|
| 2024 | 346.74 | 86.96  | 49.83 | 37.56 | 31.22 |
| 2026 | 347.12 | 87.28  | 49.86 | 37.58 | 31.23 |
| 2028 | 347.47 | 87.52  | 49.84 | 37.56 | 31.21 |
| 2030 | 347.86 | 87.81  | 49.87 | 37.6  | 31.23 |
| 2032 | 348.36 | 88.13  | 49.93 | 37.65 | 31.28 |
| 2034 | 348.74 | 88.44  | 49.94 | 37.67 | 31.29 |
| 2036 | 349.15 | 88.75  | 49.96 | 37.69 | 31.29 |
| 2038 | 349.53 | 89.03  | 49.99 | 37.73 | 31.31 |
| 2040 | 350.01 | 89.34  | 50.03 | 37.78 | 31.34 |
| 2042 | 350.39 | 89.69  | 50.05 | 37.8  | 31.35 |
| 2044 | 350.78 | 89.98  | 50.07 | 37.82 | 31.37 |
| 2046 | 351.16 | 90.27  | 50.09 | 37.84 | 31.39 |
| 2048 | 351.64 | 90.58  | 50.11 | 37.86 | 31.41 |
| 2050 | 352.04 | 90.93  | 50.14 | 37.88 | 31.42 |
| 2052 | 352.42 | 91.22  | 50.17 | 37.9  | 31.44 |
| 2054 | 352.79 | 91.52  | 50.18 | 37.92 | 31.45 |
| 2056 | 353.22 | 91.83  | 50.2  | 37.94 | 31.47 |
| 2058 | 353.61 | 92.19  | 50.22 | 37.96 | 31.49 |
| 2060 | 353.99 | 92.48  | 50.24 | 37.98 | 31.5  |
| 2062 | 354.4  | 92.81  | 50.28 | 38.02 | 31.53 |
| 2064 | 354.87 | 93.14  | 50.32 | 38.05 | 31.55 |
| 2066 | 355.23 | 93.46  | 50.31 | 38.06 | 31.55 |
| 2068 | 355.58 | 93.75  | 50.3  | 38.05 | 31.53 |
| 2070 | 355.95 | 94.07  | 50.34 | 38.1  | 31.57 |
| 2072 | 356.41 | 94.39  | 50.37 | 38.14 | 31.59 |
| 2074 | 356.81 | 94.77  | 50.4  | 38.17 | 31.61 |
| 2076 | 357.21 | 95.09  | 50.41 | 38.18 | 31.63 |
| 2078 | 357.59 | 95.39  | 50.42 | 38.2  | 31.63 |
| 2080 | 357.99 | 95.71  | 50.47 | 38.24 | 31.66 |
| 2082 | 358.4  | 96.07  | 50.47 | 38.24 | 31.66 |
| 2084 | 358.78 | 96.41  | 50.51 | 38.28 | 31.69 |
| 2086 | 359.16 | 96.74  | 50.53 | 38.31 | 31.7  |
| 2088 | 359.53 | 97.06  | 50.54 | 38.3  | 31.7  |
| 2090 | 359.97 | 97.44  | 50.56 | 38.32 | 31.73 |
| 2092 | 360.37 | 97.78  | 50.58 | 38.35 | 31.76 |
| 2094 | 360.76 | 98.13  | 50.62 | 38.39 | 31.78 |
| 2096 | 361.14 | 98.48  | 50.67 | 38.44 | 31.83 |
| 2098 | 361.6  | 98.88  | 50.7  | 38.48 | 31.87 |
| 2100 | 361.96 | 99.19  | 50.71 | 38.47 | 31.85 |
| 2102 | 362.35 | 99.51  | 50.72 | 38.49 | 31.86 |
| 2104 | 362.72 | 99.83  | 50.73 | 38.51 | 31.87 |
| 2106 | 363.16 | 100.23 | 50.75 | 38.52 | 31.89 |
| 2108 | 363.51 | 100.54 | 50.75 | 38.54 | 31.89 |
| 2110 | 363.88 | 100.87 | 50.77 | 38.57 | 31.9  |



|      |        |        |       |       |       |
|------|--------|--------|-------|-------|-------|
| 2112 | 364.28 | 101.24 | 50.83 | 38.64 | 31.96 |
| 2114 | 364.7  | 101.64 | 50.85 | 38.65 | 31.95 |
| 2116 | 365.11 | 102    | 50.89 | 38.69 | 31.98 |
| 2118 | 365.51 | 102.37 | 50.92 | 38.73 | 32.02 |
| 2120 | 365.87 | 102.7  | 50.94 | 38.74 | 32.02 |
| 2122 | 366.32 | 103.11 | 50.97 | 38.77 | 32.05 |
| 2124 | 366.67 | 103.45 | 50.98 | 38.78 | 32.05 |
| 2126 | 367.03 | 103.78 | 50.99 | 38.81 | 32.07 |
| 2128 | 367.42 | 104.14 | 51.03 | 38.84 | 32.09 |
| 2130 | 367.83 | 104.52 | 51.02 | 38.83 | 32.08 |
| 2132 | 368.23 | 104.9  | 51.06 | 38.87 | 32.11 |
| 2134 | 368.61 | 105.26 | 51.1  | 38.91 | 32.14 |
| 2136 | 369    | 105.65 | 51.08 | 38.89 | 32.12 |
| 2138 | 369.37 | 106    | 51.1  | 38.9  | 32.14 |
| 2140 | 369.76 | 106.39 | 51.15 | 38.96 | 32.18 |
| 2142 | 370.1  | 106.72 | 51.14 | 38.94 | 32.18 |
| 2144 | 370.44 | 107.05 | 51.13 | 38.94 | 32.15 |
| 2146 | 370.89 | 107.47 | 51.18 | 38.98 | 32.19 |
| 2148 | 371.28 | 107.82 | 51.19 | 38.99 | 32.2  |
| 2150 | 371.66 | 108.19 | 51.23 | 39.03 | 32.23 |
| 2152 | 372.03 | 108.57 | 51.26 | 39.07 | 32.27 |
| 2154 | 372.46 | 109    | 51.29 | 39.09 | 32.28 |
| 2156 | 372.79 | 109.35 | 51.29 | 39.1  | 32.27 |
| 2158 | 373.17 | 109.72 | 51.32 | 39.12 | 32.29 |
| 2160 | 373.55 | 110.09 | 51.35 | 39.17 | 32.32 |
| 2162 | 373.98 | 110.52 | 51.37 | 39.2  | 32.32 |
| 2164 | 374.35 | 110.88 | 51.38 | 39.21 | 32.32 |
| 2166 | 374.7  | 111.25 | 51.4  | 39.23 | 32.35 |
| 2168 | 375.07 | 111.62 | 51.43 | 39.27 | 32.37 |
| 2170 | 375.5  | 112.06 | 51.45 | 39.29 | 32.39 |
| 2172 | 375.82 | 112.37 | 51.43 | 39.28 | 32.36 |
| 2174 | 376.16 | 112.72 | 51.43 | 39.29 | 32.35 |
| 2176 | 376.56 | 113.12 | 51.49 | 39.35 | 32.39 |
| 2178 | 376.98 | 113.53 | 51.49 | 39.35 | 32.4  |
| 2180 | 377.32 | 113.89 | 51.48 | 39.34 | 32.39 |
| 2182 | 377.69 | 114.29 | 51.52 | 39.37 | 32.43 |
| 2184 | 378.08 | 114.69 | 51.57 | 39.43 | 32.47 |
| 2186 | 378.5  | 115.12 | 51.59 | 39.43 | 32.47 |
| 2188 | 378.88 | 115.5  | 51.62 | 39.46 | 32.5  |
| 2190 | 379.23 | 115.88 | 51.64 | 39.48 | 32.51 |
| 2192 | 379.58 | 116.27 | 51.66 | 39.5  | 32.53 |
| 2194 | 379.99 | 116.7  | 51.68 | 39.52 | 32.54 |
| 2196 | 380.33 | 117.07 | 51.7  | 39.54 | 32.54 |
| 2198 | 380.67 | 117.43 | 51.69 | 39.53 | 32.53 |

|      |        |        |       |       |       |
|------|--------|--------|-------|-------|-------|
| 2200 | 381.08 | 117.81 | 51.72 | 39.56 | 32.56 |
| 2202 | 381.43 | 118.22 | 51.7  | 39.55 | 32.53 |
| 2204 | 381.84 | 118.65 | 51.78 | 39.62 | 32.6  |
| 2206 | 382.2  | 119.05 | 51.8  | 39.65 | 32.63 |
| 2208 | 382.61 | 119.43 | 51.82 | 39.66 | 32.64 |
| 2210 | 382.94 | 119.85 | 51.83 | 39.69 | 32.64 |
| 2212 | 383.3  | 120.22 | 51.84 | 39.7  | 32.65 |
| 2214 | 383.67 | 120.63 | 51.89 | 39.75 | 32.68 |
| 2216 | 384.09 | 121.03 | 51.91 | 39.78 | 32.7  |
| 2218 | 384.46 | 121.47 | 51.93 | 39.79 | 32.72 |
| 2220 | 384.82 | 121.85 | 51.95 | 39.81 | 32.74 |
| 2222 | 385.18 | 122.24 | 51.97 | 39.82 | 32.76 |
| 2224 | 385.58 | 122.62 | 52    | 39.84 | 32.77 |
| 2226 | 385.91 | 123.06 | 52    | 39.82 | 32.74 |
| 2228 | 386.27 | 123.46 | 52.03 | 39.87 | 32.8  |
| 2230 | 386.62 | 123.86 | 52.05 | 39.88 | 32.81 |
| 2232 | 387.03 | 124.24 | 52.07 | 39.91 | 32.82 |
| 2234 | 387.37 | 124.71 | 52.09 | 39.93 | 32.84 |
| 2236 | 387.72 | 125.11 | 52.11 | 39.95 | 32.86 |
| 2238 | 388.06 | 125.5  | 52.14 | 39.97 | 32.88 |
| 2240 | 388.46 | 125.89 | 52.16 | 39.99 | 32.89 |
| 2242 | 388.83 | 126.35 | 52.18 | 40.01 | 32.91 |
| 2244 | 389.14 | 126.68 | 52.15 | 39.98 | 32.87 |
| 2246 | 389.51 | 127.1  | 52.19 | 40.02 | 32.9  |
| 2248 | 389.93 | 127.51 | 52.24 | 40.08 | 32.95 |
| 2250 | 390.28 | 127.98 | 52.27 | 40.11 | 32.97 |
| 2252 | 390.64 | 128.37 | 52.29 | 40.13 | 32.99 |
| 2254 | 391    | 128.76 | 52.31 | 40.16 | 33    |
| 2256 | 391.42 | 129.17 | 52.34 | 40.17 | 33.01 |
| 2258 | 391.77 | 129.64 | 52.36 | 40.18 | 33.04 |
| 2260 | 392.11 | 130.04 | 52.38 | 40.2  | 33.05 |
| 2262 | 392.42 | 130.42 | 52.39 | 40.21 | 33.05 |
| 2264 | 392.83 | 130.81 | 52.41 | 40.22 | 33.07 |
| 2266 | 393.22 | 131.33 | 52.49 | 40.29 | 33.12 |
| 2268 | 393.61 | 131.75 | 52.54 | 40.34 | 33.18 |
| 2270 | 393.92 | 132.13 | 52.54 | 40.33 | 33.16 |
| 2272 | 394.33 | 132.54 | 52.55 | 40.34 | 33.17 |
| 2274 | 394.66 | 132.99 | 52.56 | 40.35 | 33.16 |
| 2276 | 395.01 | 133.38 | 52.58 | 40.38 | 33.18 |
| 2278 | 395.36 | 133.77 | 52.6  | 40.4  | 33.2  |
| 2280 | 395.78 | 134.17 | 52.62 | 40.42 | 33.21 |
| 2282 | 396.14 | 134.64 | 52.65 | 40.44 | 33.22 |
| 2284 | 396.51 | 135.07 | 52.7  | 40.48 | 33.25 |
| 2286 | 396.84 | 135.45 | 52.7  | 40.49 | 33.26 |

|      |        |        |       |       |       |
|------|--------|--------|-------|-------|-------|
| 2288 | 397.23 | 135.87 | 52.72 | 40.5  | 33.28 |
| 2290 | 397.58 | 136.33 | 52.73 | 40.51 | 33.29 |
| 2292 | 397.94 | 136.73 | 52.76 | 40.52 | 33.31 |
| 2294 | 398.28 | 137.15 | 52.78 | 40.55 | 33.32 |
| 2296 | 398.65 | 137.55 | 52.79 | 40.55 | 33.33 |
| 2298 | 398.99 | 138.04 | 52.83 | 40.58 | 33.36 |
| 2300 | 399.35 | 138.44 | 52.86 | 40.6  | 33.38 |
| 2302 | 399.72 | 138.84 | 52.88 | 40.62 | 33.4  |
| 2304 | 400.13 | 139.22 | 52.88 | 40.63 | 33.38 |
| 2306 | 400.5  | 139.7  | 52.93 | 40.67 | 33.4  |
| 2308 | 400.86 | 140.12 | 52.96 | 40.71 | 33.45 |
| 2310 | 401.16 | 140.52 | 52.98 | 40.71 | 33.45 |
| 2312 | 401.56 | 140.95 | 53.01 | 40.75 | 33.48 |
| 2314 | 401.91 | 141.42 | 53.02 | 40.78 | 33.48 |
| 2316 | 402.31 | 141.86 | 53.07 | 40.81 | 33.53 |
| 2318 | 402.67 | 142.26 | 53.08 | 40.81 | 33.54 |
| 2320 | 403.01 | 142.66 | 53.1  | 40.82 | 33.55 |
| 2322 | 403.39 | 143.14 | 53.12 | 40.84 | 33.57 |
| 2324 | 403.69 | 143.55 | 53.12 | 40.83 | 33.58 |
| 2326 | 404.05 | 143.96 | 53.17 | 40.87 | 33.6  |
| 2328 | 404.52 | 144.45 | 53.2  | 40.9  | 33.62 |
| 2330 | 404.92 | 144.86 | 53.23 | 40.92 | 33.64 |
| 2332 | 405.32 | 145.3  | 53.27 | 40.96 | 33.69 |
| 2334 | 405.65 | 145.7  | 53.29 | 40.97 | 33.69 |
| 2336 | 406.02 | 146.19 | 53.3  | 40.98 | 33.69 |
| 2338 | 406.37 | 146.63 | 53.35 | 41.03 | 33.72 |
| 2340 | 406.75 | 147.07 | 53.4  | 41.06 | 33.78 |
| 2342 | 407.09 | 147.43 | 53.4  | 41.05 | 33.76 |
| 2344 | 407.46 | 147.85 | 53.43 | 41.08 | 33.78 |
| 2346 | 407.91 | 148.36 | 53.48 | 41.14 | 33.82 |
| 2348 | 408.23 | 148.75 | 53.48 | 41.13 | 33.82 |
| 2350 | 408.56 | 149.17 | 53.52 | 41.15 | 33.83 |
| 2352 | 408.98 | 149.7  | 53.56 | 41.2  | 33.87 |
| 2354 | 409.31 | 150.08 | 53.56 | 41.19 | 33.86 |
| 2356 | 409.67 | 150.48 | 53.58 | 41.2  | 33.86 |
| 2358 | 410.05 | 150.92 | 53.63 | 41.25 | 33.9  |
| 2360 | 410.45 | 151.33 | 53.65 | 41.26 | 33.9  |
| 2362 | 410.78 | 151.81 | 53.68 | 41.27 | 33.92 |
| 2364 | 411.12 | 152.27 | 53.73 | 41.31 | 33.96 |
| 2366 | 411.49 | 152.7  | 53.75 | 41.33 | 33.98 |
| 2368 | 411.85 | 153.09 | 53.75 | 41.32 | 33.97 |
| 2370 | 412.31 | 153.6  | 53.81 | 41.35 | 34    |
| 2372 | 412.64 | 154.01 | 53.81 | 41.35 | 34.01 |
| 2374 | 412.95 | 154.43 | 53.83 | 41.35 | 34.01 |

|      |        |        |       |       |       |
|------|--------|--------|-------|-------|-------|
| 2376 | 413.3  | 154.9  | 53.89 | 41.41 | 34.06 |
| 2378 | 413.71 | 155.37 | 53.94 | 41.45 | 34.1  |
| 2380 | 414.1  | 155.8  | 53.96 | 41.46 | 34.11 |
| 2382 | 414.49 | 156.22 | 54    | 41.5  | 34.13 |
| 2384 | 414.87 | 156.66 | 54.04 | 41.52 | 34.15 |
| 2386 | 415.26 | 157.15 | 54.06 | 41.54 | 34.16 |
| 2388 | 415.55 | 157.55 | 54.08 | 41.55 | 34.17 |
| 2390 | 415.86 | 157.95 | 54.09 | 41.56 | 34.16 |
| 2392 | 416.23 | 158.39 | 54.12 | 41.59 | 34.17 |
| 2394 | 416.69 | 158.91 | 54.17 | 41.63 | 34.2  |
| 2396 | 417.1  | 159.33 | 54.2  | 41.65 | 34.22 |
| 2398 | 417.47 | 159.77 | 54.24 | 41.67 | 34.24 |
| 2400 | 417.81 | 160.17 | 54.25 | 41.67 | 34.24 |
| 2402 | 418.19 | 160.68 | 54.29 | 41.7  | 34.27 |
| 2404 | 418.53 | 161.12 | 54.34 | 41.74 | 34.3  |
| 2406 | 418.86 | 161.51 | 54.32 | 41.72 | 34.28 |
| 2408 | 419.27 | 161.95 | 54.37 | 41.74 | 34.29 |
| 2410 | 419.76 | 162.47 | 54.43 | 41.79 | 34.34 |
| 2412 | 420.12 | 162.9  | 54.46 | 41.81 | 34.36 |
| 2414 | 420.46 | 163.32 | 54.49 | 41.83 | 34.37 |
| 2416 | 420.77 | 163.74 | 54.52 | 41.84 | 34.4  |
| 2418 | 421.18 | 164.22 | 54.53 | 41.85 | 34.39 |
| 2420 | 421.57 | 164.65 | 54.58 | 41.87 | 34.43 |
| 2422 | 421.93 | 165.06 | 54.6  | 41.87 | 34.44 |
| 2424 | 422.31 | 165.48 | 54.61 | 41.88 | 34.44 |
| 2426 | 422.68 | 165.95 | 54.6  | 41.87 | 34.42 |
| 2428 | 422.97 | 166.37 | 54.61 | 41.87 | 34.41 |
| 2430 | 423.32 | 166.81 | 54.67 | 41.91 | 34.44 |
| 2432 | 423.69 | 167.23 | 54.7  | 41.94 | 34.47 |
| 2434 | 424.13 | 167.72 | 54.72 | 41.94 | 34.46 |
| 2436 | 424.52 | 168.14 | 54.75 | 41.94 | 34.47 |
| 2438 | 424.94 | 168.62 | 54.83 | 42.02 | 34.54 |
| 2440 | 425.27 | 169.03 | 54.84 | 42.02 | 34.54 |
| 2442 | 425.62 | 169.5  | 54.83 | 42    | 34.52 |
| 2444 | 426    | 169.95 | 54.89 | 42.06 | 34.57 |
| 2446 | 426.37 | 170.38 | 54.94 | 42.08 | 34.6  |
| 2448 | 426.83 | 170.81 | 54.97 | 42.12 | 34.62 |
| 2450 | 427.27 | 171.37 | 55.06 | 42.18 | 34.67 |
| 2452 | 427.61 | 171.78 | 55.08 | 42.21 | 34.68 |
| 2454 | 427.95 | 172.22 | 55.11 | 42.21 | 34.7  |
| 2456 | 428.37 | 172.67 | 55.17 | 42.24 | 34.73 |
| 2458 | 428.72 | 173.2  | 55.19 | 42.26 | 34.75 |
| 2460 | 429.1  | 173.62 | 55.23 | 42.28 | 34.75 |
| 2462 | 429.51 | 174.07 | 55.28 | 42.3  | 34.78 |

|      |        |        |       |       |       |
|------|--------|--------|-------|-------|-------|
| 2464 | 429.96 | 174.49 | 55.29 | 42.3  | 34.78 |
| 2466 | 430.28 | 174.97 | 55.3  | 42.3  | 34.79 |
| 2468 | 430.6  | 175.4  | 55.34 | 42.31 | 34.8  |
| 2470 | 430.98 | 175.86 | 55.4  | 42.35 | 34.84 |
| 2472 | 431.39 | 176.27 | 55.43 | 42.36 | 34.85 |
| 2474 | 431.81 | 176.8  | 55.5  | 42.43 | 34.89 |
| 2476 | 432.21 | 177.24 | 55.55 | 42.46 | 34.9  |
| 2478 | 432.59 | 177.68 | 55.59 | 42.49 | 34.94 |
| 2480 | 432.96 | 178.11 | 55.62 | 42.51 | 34.96 |
| 2482 | 433.33 | 178.61 | 55.67 | 42.53 | 34.97 |
| 2484 | 433.65 | 179.04 | 55.71 | 42.57 | 34.98 |
| 2486 | 434    | 179.48 | 55.74 | 42.57 | 34.99 |
| 2488 | 434.44 | 179.91 | 55.78 | 42.6  | 35.02 |
| 2490 | 434.95 | 180.41 | 55.81 | 42.61 | 35.04 |
| 2492 | 435.36 | 180.85 | 55.86 | 42.62 | 35.05 |
| 2494 | 435.73 | 181.3  | 55.91 | 42.65 | 35.08 |
| 2496 | 436.06 | 181.74 | 55.95 | 42.66 | 35.08 |
| 2498 | 436.41 | 182.22 | 55.98 | 42.68 | 35.1  |
| 2500 | 436.77 | 182.66 | 56.03 | 42.7  | 35.1  |
| 2502 | 437.19 | 183.11 | 56.07 | 42.73 | 35.12 |
| 2504 | 437.73 | 183.56 | 56.13 | 42.76 | 35.15 |
| 2506 | 438.14 | 184.06 | 56.17 | 42.78 | 35.15 |
| 2508 | 438.53 | 184.48 | 56.21 | 42.8  | 35.16 |
| 2510 | 438.88 | 184.91 | 56.25 | 42.82 | 35.17 |
| 2512 | 439.28 | 185.36 | 56.29 | 42.84 | 35.18 |
| 2514 | 439.62 | 185.89 | 56.34 | 42.86 | 35.2  |
| 2516 | 440.01 | 186.33 | 56.38 | 42.88 | 35.21 |
| 2518 | 440.4  | 186.77 | 56.42 | 42.9  | 35.22 |
| 2520 | 440.85 | 187.2  | 56.47 | 42.93 | 35.23 |
| 2522 | 441.21 | 187.71 | 56.52 | 42.96 | 35.25 |
| 2524 | 441.56 | 188.14 | 56.57 | 42.98 | 35.26 |
| 2526 | 441.89 | 188.58 | 56.61 | 42.99 | 35.27 |
| 2528 | 442.32 | 189.03 | 56.65 | 43.01 | 35.29 |
| 2530 | 442.74 | 189.56 | 56.72 | 43.03 | 35.31 |
| 2532 | 443.13 | 189.98 | 56.75 | 43.04 | 35.32 |
| 2534 | 443.51 | 190.42 | 56.79 | 43.06 | 35.33 |
| 2536 | 443.9  | 190.85 | 56.84 | 43.08 | 35.34 |
| 2538 | 444.22 | 191.37 | 56.9  | 43.1  | 35.35 |
| 2540 | 444.56 | 191.82 | 56.94 | 43.12 | 35.36 |
| 2542 | 444.97 | 192.27 | 57    | 43.16 | 35.4  |
| 2544 | 445.38 | 192.69 | 57.03 | 43.16 | 35.39 |
| 2546 | 445.89 | 193.24 | 57.11 | 43.22 | 35.44 |
| 2548 | 446.27 | 193.66 | 57.13 | 43.22 | 35.43 |
| 2550 | 446.61 | 194.09 | 57.17 | 43.22 | 35.44 |

|      |        |        |       |       |       |
|------|--------|--------|-------|-------|-------|
| 2552 | 446.99 | 194.53 | 57.21 | 43.23 | 35.44 |
| 2554 | 447.34 | 195.05 | 57.26 | 43.24 | 35.46 |
| 2556 | 447.73 | 195.5  | 57.31 | 43.28 | 35.51 |
| 2558 | 448.11 | 195.93 | 57.35 | 43.28 | 35.5  |
| 2560 | 448.58 | 196.39 | 57.4  | 43.3  | 35.51 |
| 2562 | 448.9  | 196.89 | 57.43 | 43.31 | 35.52 |
| 2564 | 449.24 | 197.34 | 57.5  | 43.36 | 35.56 |
| 2566 | 449.58 | 197.79 | 57.55 | 43.39 | 35.57 |
| 2568 | 449.96 | 198.25 | 57.62 | 43.43 | 35.61 |
| 2570 | 450.32 | 198.64 | 57.61 | 43.39 | 35.58 |
| 2572 | 450.83 | 199.17 | 57.68 | 43.43 | 35.6  |
| 2574 | 451.22 | 199.63 | 57.73 | 43.46 | 35.63 |
| 2576 | 451.55 | 200.09 | 57.77 | 43.47 | 35.64 |
| 2578 | 451.92 | 200.55 | 57.82 | 43.48 | 35.66 |
| 2580 | 452.27 | 201.06 | 57.88 | 43.51 | 35.68 |
| 2582 | 452.67 | 201.49 | 57.94 | 43.54 | 35.7  |
| 2584 | 453.08 | 201.93 | 57.98 | 43.55 | 35.7  |
| 2586 | 453.57 | 202.44 | 58.04 | 43.58 | 35.72 |
| 2588 | 453.92 | 202.84 | 58.04 | 43.58 | 35.7  |
| 2590 | 454.3  | 203.3  | 58.11 | 43.62 | 35.72 |
| 2592 | 454.7  | 203.75 | 58.18 | 43.66 | 35.77 |
| 2594 | 455.05 | 204.28 | 58.23 | 43.69 | 35.8  |
| 2596 | 455.38 | 204.67 | 58.23 | 43.65 | 35.76 |
| 2598 | 455.79 | 205.13 | 58.29 | 43.68 | 35.79 |
| 2600 | 456.21 | 205.61 | 58.38 | 43.74 | 35.84 |
| 2602 | 456.67 | 206.08 | 58.46 | 43.78 | 35.89 |
| 2604 | 456.97 | 206.56 | 58.48 | 43.77 | 35.89 |
| 2606 | 457.27 | 207.01 | 58.53 | 43.79 | 35.9  |
| 2608 | 457.67 | 207.42 | 58.56 | 43.78 | 35.9  |
| 2610 | 458.1  | 207.85 | 58.61 | 43.78 | 35.91 |
| 2612 | 458.55 | 208.36 | 58.67 | 43.81 | 35.93 |
| 2614 | 458.99 | 208.82 | 58.75 | 43.86 | 35.97 |
| 2616 | 459.36 | 209.25 | 58.79 | 43.86 | 35.97 |
| 2618 | 459.73 | 209.79 | 58.84 | 43.9  | 36    |
| 2620 | 460.02 | 210.23 | 58.88 | 43.9  | 36    |
| 2622 | 460.37 | 210.68 | 58.95 | 43.93 | 36.04 |
| 2624 | 460.91 | 211.14 | 59.02 | 43.99 | 36.07 |
| 2626 | 461.39 | 211.66 | 59.09 | 44.03 | 36.11 |
| 2628 | 461.89 | 212.13 | 59.19 | 44.08 | 36.13 |
| 2630 | 462.33 | 212.57 | 59.24 | 44.1  | 36.15 |
| 2632 | 462.74 | 213.01 | 59.29 | 44.12 | 36.17 |
| 2634 | 463.14 | 213.52 | 59.33 | 44.14 | 36.18 |
| 2636 | 463.47 | 213.96 | 59.42 | 44.17 | 36.2  |
| 2638 | 463.82 | 214.41 | 59.46 | 44.19 | 36.21 |

|      |        |        |       |       |       |
|------|--------|--------|-------|-------|-------|
| 2640 | 464.19 | 214.82 | 59.48 | 44.17 | 36.2  |
| 2642 | 464.64 | 215.28 | 59.55 | 44.2  | 36.23 |
| 2644 | 465.17 | 215.81 | 59.62 | 44.23 | 36.24 |
| 2646 | 465.54 | 216.21 | 59.64 | 44.21 | 36.22 |
| 2648 | 465.89 | 216.65 | 59.68 | 44.2  | 36.21 |
| 2650 | 466.25 | 217.09 | 59.73 | 44.21 | 36.23 |
| 2652 | 466.63 | 217.61 | 59.8  | 44.24 | 36.27 |
| 2654 | 467.05 | 218.06 | 59.87 | 44.28 | 36.28 |
| 2656 | 467.48 | 218.52 | 59.94 | 44.32 | 36.31 |
| 2658 | 467.92 | 219.01 | 59.97 | 44.3  | 36.3  |
| 2660 | 468.26 | 219.46 | 60.01 | 44.31 | 36.31 |
| 2662 | 468.61 | 219.96 | 60.11 | 44.38 | 36.36 |
| 2664 | 468.95 | 220.4  | 60.17 | 44.41 | 36.38 |
| 2666 | 469.38 | 220.8  | 60.19 | 44.39 | 36.36 |
| 2668 | 469.84 | 221.35 | 60.27 | 44.43 | 36.39 |
| 2670 | 470.3  | 221.81 | 60.35 | 44.46 | 36.4  |
| 2672 | 470.7  | 222.24 | 60.39 | 44.5  | 36.41 |
| 2674 | 471.15 | 222.77 | 60.48 | 44.55 | 36.44 |
| 2676 | 471.48 | 223.2  | 60.55 | 44.56 | 36.43 |
| 2678 | 471.77 | 223.63 | 60.56 | 44.53 | 36.4  |
| 2680 | 472.18 | 224.1  | 60.63 | 44.55 | 36.44 |
| 2682 | 472.67 | 224.63 | 60.68 | 44.59 | 36.46 |
| 2684 | 473.06 | 225.04 | 60.72 | 44.58 | 36.43 |
| 2686 | 473.46 | 225.52 | 60.8  | 44.63 | 36.45 |
| 2688 | 473.8  | 225.94 | 60.84 | 44.64 | 36.45 |
| 2690 | 474.12 | 226.38 | 60.9  | 44.66 | 36.46 |
| 2692 | 474.53 | 226.91 | 60.96 | 44.68 | 36.47 |
| 2694 | 474.96 | 227.37 | 61.02 | 44.69 | 36.48 |
| 2696 | 475.4  | 227.81 | 61.08 | 44.7  | 36.49 |
| 2698 | 475.9  | 228.27 | 61.14 | 44.72 | 36.49 |
| 2700 | 476.31 | 228.8  | 61.22 | 44.74 | 36.5  |
| 2702 | 476.64 | 229.21 | 61.25 | 44.75 | 36.49 |
| 2704 | 477    | 229.68 | 61.34 | 44.79 | 36.52 |
| 2706 | 477.36 | 230.14 | 61.4  | 44.8  | 36.53 |
| 2708 | 477.85 | 230.68 | 61.47 | 44.82 | 36.54 |
| 2710 | 478.28 | 231.13 | 61.53 | 44.84 | 36.55 |
| 2712 | 478.71 | 231.61 | 61.61 | 44.88 | 36.58 |
| 2714 | 479.11 | 232.08 | 61.7  | 44.91 | 36.59 |
| 2716 | 479.52 | 232.61 | 61.77 | 44.94 | 36.62 |
| 2718 | 479.8  | 233.01 | 61.8  | 44.92 | 36.58 |
| 2720 | 480.18 | 233.5  | 61.87 | 44.94 | 36.61 |
| 2722 | 480.64 | 233.94 | 61.92 | 44.94 | 36.6  |
| 2724 | 481.04 | 234.46 | 62    | 44.98 | 36.62 |
| 2726 | 481.41 | 234.9  | 62.05 | 44.99 | 36.6  |

|      |        |        |       |       |       |
|------|--------|--------|-------|-------|-------|
| 2728 | 481.74 | 235.35 | 62.1  | 44.99 | 36.61 |
| 2730 | 482.01 | 235.8  | 62.16 | 44.99 | 36.61 |
| 2732 | 482.3  | 236.33 | 62.23 | 45.02 | 36.62 |
| 2734 | 482.5  | 236.81 | 62.32 | 45.05 | 36.65 |
| 2736 | 482.64 | 237.24 | 62.37 | 45.08 | 36.66 |
| 2738 | 482.76 | 237.7  | 62.44 | 45.09 | 36.66 |
| 2740 | 482.83 | 238.13 | 62.49 | 45.11 | 36.68 |
| 2742 | 482.88 | 238.66 | 62.56 | 45.15 | 36.69 |
| 2744 | 482.87 | 239.1  | 62.63 | 45.17 | 36.69 |
| 2746 | 482.78 | 239.5  | 62.65 | 45.14 | 36.65 |
| 2748 | 482.73 | 240.02 | 62.73 | 45.16 | 36.67 |
| 2750 | 482.65 | 240.47 | 62.81 | 45.2  | 36.69 |
| 2752 | 482.52 | 240.88 | 62.86 | 45.21 | 36.67 |
| 2754 | 482.35 | 241.33 | 62.94 | 45.26 | 36.68 |
| 2756 | 482.16 | 241.82 | 63    | 45.28 | 36.68 |
| 2758 | 481.95 | 242.24 | 63.07 | 45.29 | 36.68 |
| 2760 | 481.69 | 242.62 | 63.12 | 45.28 | 36.66 |
| 2762 | 481.38 | 243.09 | 63.19 | 45.29 | 36.66 |
| 2764 | 481.08 | 243.48 | 63.27 | 45.32 | 36.67 |
| 2766 | 480.78 | 243.88 | 63.34 | 45.33 | 36.67 |
| 2768 | 480.44 | 244.25 | 63.39 | 45.33 | 36.67 |
| 2770 | 480.09 | 244.62 | 63.47 | 45.38 | 36.68 |
| 2772 | 479.65 | 245.03 | 63.54 | 45.39 | 36.67 |
| 2774 | 479.23 | 245.36 | 63.59 | 45.38 | 36.66 |
| 2776 | 478.81 | 245.7  | 63.67 | 45.39 | 36.67 |
| 2778 | 478.32 | 246.05 | 63.74 | 45.41 | 36.67 |
| 2780 | 477.87 | 246.42 | 63.8  | 45.41 | 36.67 |
| 2782 | 477.36 | 246.69 | 63.83 | 45.4  | 36.65 |
| 2784 | 476.87 | 246.99 | 63.89 | 45.42 | 36.65 |
| 2786 | 476.29 | 247.35 | 63.97 | 45.44 | 36.65 |
| 2788 | 475.77 | 247.63 | 64.04 | 45.45 | 36.66 |
| 2790 | 475.24 | 247.9  | 64.1  | 45.47 | 36.66 |
| 2792 | 474.71 | 248.16 | 64.18 | 45.49 | 36.68 |
| 2794 | 474.14 | 248.43 | 64.24 | 45.51 | 36.66 |
| 2796 | 473.49 | 248.72 | 64.31 | 45.53 | 36.69 |
| 2798 | 472.93 | 248.95 | 64.4  | 45.55 | 36.7  |
| 2800 | 472.31 | 249.15 | 64.44 | 45.55 | 36.68 |
| 2802 | 471.62 | 249.36 | 64.48 | 45.54 | 36.68 |
| 2804 | 471.03 | 249.64 | 64.6  | 45.59 | 36.71 |
| 2806 | 470.39 | 249.82 | 64.65 | 45.61 | 36.71 |
| 2808 | 469.79 | 250.04 | 64.73 | 45.63 | 36.73 |
| 2810 | 469.14 | 250.21 | 64.79 | 45.63 | 36.73 |
| 2812 | 468.4  | 250.4  | 64.85 | 45.64 | 36.73 |
| 2814 | 467.72 | 250.53 | 64.89 | 45.63 | 36.72 |



|      |        |        |       |       |       |
|------|--------|--------|-------|-------|-------|
| 2816 | 467.05 | 250.67 | 64.94 | 45.64 | 36.71 |
| 2818 | 466.42 | 250.85 | 65.03 | 45.68 | 36.75 |
| 2820 | 465.62 | 250.99 | 65.09 | 45.67 | 36.73 |
| 2822 | 464.96 | 251.12 | 65.17 | 45.71 | 36.75 |
| 2824 | 464.27 | 251.22 | 65.21 | 45.7  | 36.74 |
| 2826 | 463.49 | 251.35 | 65.3  | 45.73 | 36.76 |
| 2828 | 462.76 | 251.42 | 65.32 | 45.67 | 36.71 |
| 2830 | 462.08 | 251.54 | 65.41 | 45.72 | 36.74 |
| 2832 | 461.4  | 251.64 | 65.48 | 45.74 | 36.74 |
| 2834 | 460.71 | 251.72 | 65.55 | 45.75 | 36.75 |
| 2836 | 459.89 | 251.82 | 65.62 | 45.76 | 36.77 |
| 2838 | 459.18 | 251.87 | 65.69 | 45.75 | 36.76 |
| 2840 | 458.47 | 251.94 | 65.75 | 45.76 | 36.77 |
| 2842 | 457.62 | 251.98 | 65.8  | 45.75 | 36.75 |
| 2844 | 456.87 | 251.99 | 65.82 | 45.71 | 36.71 |
| 2846 | 456.16 | 252.04 | 65.91 | 45.72 | 36.72 |
| 2848 | 455.43 | 252.06 | 65.95 | 45.72 | 36.71 |
| 2850 | 454.58 | 252.1  | 66.01 | 45.72 | 36.71 |
| 2852 | 453.87 | 252.13 | 66.1  | 45.76 | 36.75 |
| 2854 | 453.15 | 252.15 | 66.16 | 45.76 | 36.74 |
| 2856 | 452.42 | 252.17 | 66.22 | 45.76 | 36.75 |
| 2858 | 451.67 | 252.15 | 66.26 | 45.74 | 36.72 |
| 2860 | 450.83 | 252.16 | 66.33 | 45.75 | 36.74 |
| 2862 | 450.09 | 252.16 | 66.4  | 45.75 | 36.73 |
| 2864 | 449.38 | 252.18 | 66.49 | 45.78 | 36.76 |
| 2866 | 448.62 | 252.15 | 66.54 | 45.78 | 36.74 |
| 2868 | 447.79 | 252.15 | 66.61 | 45.81 | 36.78 |
| 2870 | 447.04 | 252.1  | 66.67 | 45.77 | 36.76 |
| 2872 | 446.33 | 252.1  | 66.76 | 45.8  | 36.79 |
| 2874 | 445.6  | 252.08 | 66.84 | 45.78 | 36.79 |
| 2876 | 444.73 | 252.03 | 66.9  | 45.79 | 36.79 |
| 2878 | 443.99 | 252    | 66.97 | 45.8  | 36.8  |
| 2880 | 443.28 | 251.97 | 67.03 | 45.81 | 36.81 |
| 2882 | 442.52 | 251.91 | 67.08 | 45.8  | 36.78 |
| 2884 | 441.64 | 251.85 | 67.14 | 45.78 | 36.77 |
| 2886 | 440.91 | 251.8  | 67.23 | 45.8  | 36.8  |
| 2888 | 440.18 | 251.75 | 67.29 | 45.82 | 36.81 |
| 2890 | 439.42 | 251.67 | 67.33 | 45.8  | 36.78 |
| 2892 | 438.52 | 251.57 | 67.38 | 45.78 | 36.76 |
| 2894 | 437.83 | 251.53 | 67.5  | 45.82 | 36.8  |
| 2896 | 437.04 | 251.41 | 67.51 | 45.75 | 36.76 |
| 2898 | 436.19 | 251.34 | 67.57 | 45.76 | 36.78 |
| 2900 | 435.44 | 251.26 | 67.63 | 45.74 | 36.76 |
| 2902 | 434.67 | 251.14 | 67.69 | 45.73 | 36.74 |

|      |        |        |       |       |       |
|------|--------|--------|-------|-------|-------|
| 2904 | 433.92 | 251.05 | 67.76 | 45.72 | 36.74 |
| 2906 | 433.19 | 250.96 | 67.82 | 45.73 | 36.75 |
| 2908 | 432.35 | 250.89 | 67.9  | 45.74 | 36.78 |
| 2910 | 431.59 | 250.76 | 67.96 | 45.73 | 36.76 |
| 2912 | 430.86 | 250.67 | 68.03 | 45.72 | 36.76 |
| 2914 | 430.13 | 250.59 | 68.11 | 45.74 | 36.77 |
| 2916 | 429.25 | 250.44 | 68.14 | 45.71 | 36.75 |
| 2918 | 428.52 | 250.34 | 68.22 | 45.71 | 36.76 |
| 2920 | 427.8  | 250.25 | 68.31 | 45.72 | 36.77 |
| 2922 | 427.08 | 250.17 | 68.39 | 45.74 | 36.8  |
| 2924 | 426.21 | 250.02 | 68.45 | 45.75 | 36.79 |
| 2926 | 425.45 | 249.88 | 68.49 | 45.7  | 36.75 |
| 2928 | 424.74 | 249.79 | 68.59 | 45.74 | 36.79 |
| 2930 | 424.01 | 249.66 | 68.64 | 45.73 | 36.76 |
| 2932 | 423.25 | 249.51 | 68.67 | 45.7  | 36.74 |
| 2934 | 422.42 | 249.39 | 68.78 | 45.74 | 36.79 |
| 2936 | 421.7  | 249.26 | 68.84 | 45.74 | 36.79 |
| 2938 | 420.95 | 249.11 | 68.89 | 45.72 | 36.77 |
| 2940 | 420.13 | 249.02 | 69    | 45.77 | 36.81 |
| 2942 | 419.38 | 248.84 | 69.04 | 45.74 | 36.8  |
| 2944 | 418.67 | 248.72 | 69.13 | 45.75 | 36.83 |
| 2946 | 417.94 | 248.57 | 69.18 | 45.73 | 36.81 |
| 2948 | 417.12 | 248.45 | 69.26 | 45.74 | 36.83 |
| 2950 | 416.35 | 248.25 | 69.29 | 45.69 | 36.79 |
| 2952 | 415.62 | 248.1  | 69.35 | 45.67 | 36.79 |
| 2954 | 414.94 | 248    | 69.46 | 45.71 | 36.84 |
| 2956 | 414.08 | 247.81 | 69.5  | 45.68 | 36.82 |
| 2958 | 413.34 | 247.63 | 69.56 | 45.67 | 36.8  |
| 2960 | 412.63 | 247.49 | 69.62 | 45.68 | 36.81 |
| 2962 | 411.94 | 247.37 | 69.72 | 45.7  | 36.84 |
| 2964 | 411.1  | 247.2  | 69.76 | 45.68 | 36.82 |
| 2966 | 410.39 | 247.04 | 69.85 | 45.69 | 36.84 |
| 2968 | 409.65 | 246.86 | 69.89 | 45.67 | 36.82 |
| 2970 | 408.94 | 246.7  | 69.96 | 45.68 | 36.84 |
| 2972 | 408.13 | 246.5  | 70.02 | 45.69 | 36.84 |
| 2974 | 407.42 | 246.34 | 70.09 | 45.69 | 36.83 |
| 2976 | 406.7  | 246.16 | 70.14 | 45.67 | 36.82 |
| 2978 | 405.86 | 245.98 | 70.2  | 45.66 | 36.82 |
| 2980 | 405.18 | 245.81 | 70.27 | 45.67 | 36.83 |
| 2982 | 404.5  | 245.66 | 70.37 | 45.68 | 36.84 |
| 2984 | 403.77 | 245.47 | 70.4  | 45.65 | 36.84 |
| 2986 | 403.05 | 245.29 | 70.44 | 45.64 | 36.83 |
| 2988 | 402.35 | 245.13 | 70.52 | 45.64 | 36.84 |
| 2990 | 401.53 | 244.92 | 70.58 | 45.63 | 36.83 |

|      |        |        |       |       |       |
|------|--------|--------|-------|-------|-------|
| 2992 | 400.83 | 244.73 | 70.63 | 45.62 | 36.82 |
| 2994 | 400.13 | 244.55 | 70.69 | 45.61 | 36.82 |
| 2996 | 399.44 | 244.39 | 70.75 | 45.61 | 36.83 |
| 2998 | 398.64 | 244.2  | 70.81 | 45.61 | 36.84 |
| 3000 | 397.92 | 243.99 | 70.87 | 45.59 | 36.82 |
| 3002 | 397.23 | 243.79 | 70.91 | 45.57 | 36.81 |
| 3004 | 396.42 | 243.6  | 70.96 | 45.57 | 36.81 |
| 3006 | 395.73 | 243.37 | 71.03 | 45.55 | 36.8  |
| 3008 | 395.04 | 243.19 | 71.09 | 45.56 | 36.81 |
| 3010 | 394.33 | 242.99 | 71.13 | 45.54 | 36.79 |
| 3012 | 393.48 | 242.71 | 71.14 | 45.48 | 36.74 |
| 3014 | 392.8  | 242.52 | 71.21 | 45.47 | 36.75 |
| 3016 | 392.12 | 242.32 | 71.25 | 45.44 | 36.74 |
| 3018 | 391.44 | 242.13 | 71.3  | 45.43 | 36.74 |
| 3020 | 390.74 | 241.92 | 71.33 | 45.41 | 36.72 |
| 3022 | 389.94 | 241.7  | 71.39 | 45.4  | 36.71 |
| 3024 | 389.28 | 241.51 | 71.48 | 45.4  | 36.72 |
| 3026 | 388.61 | 241.31 | 71.53 | 45.4  | 36.71 |
| 3028 | 387.82 | 241.12 | 71.6  | 45.4  | 36.74 |
| 3030 | 387.14 | 240.88 | 71.65 | 45.39 | 36.72 |
| 3032 | 386.48 | 240.69 | 71.7  | 45.4  | 36.72 |
| 3034 | 385.81 | 240.48 | 71.76 | 45.38 | 36.72 |
| 3036 | 385.03 | 240.26 | 71.81 | 45.38 | 36.72 |
| 3038 | 384.38 | 240.07 | 71.88 | 45.39 | 36.74 |
| 3040 | 383.72 | 239.87 | 71.95 | 45.39 | 36.75 |
| 3042 | 383.09 | 239.69 | 72.03 | 45.41 | 36.77 |
| 3044 | 382.29 | 239.46 | 72.05 | 45.38 | 36.73 |
| 3046 | 381.62 | 239.21 | 72.09 | 45.36 | 36.73 |
| 3048 | 381.01 | 239.03 | 72.19 | 45.38 | 36.78 |
| 3050 | 380.33 | 238.82 | 72.23 | 45.36 | 36.77 |
| 3052 | 379.56 | 238.59 | 72.28 | 45.35 | 36.76 |
| 3054 | 378.92 | 238.38 | 72.34 | 45.35 | 36.76 |
| 3056 | 378.27 | 238.17 | 72.38 | 45.35 | 36.76 |
| 3058 | 377.62 | 237.97 | 72.44 | 45.35 | 36.77 |
| 3060 | 376.88 | 237.77 | 72.51 | 45.36 | 36.79 |
| 3062 | 376.2  | 237.5  | 72.54 | 45.33 | 36.76 |
| 3064 | 375.55 | 237.28 | 72.58 | 45.33 | 36.75 |
| 3066 | 374.9  | 237.06 | 72.62 | 45.31 | 36.75 |
| 3068 | 374.15 | 236.8  | 72.66 | 45.29 | 36.74 |
| 3070 | 373.49 | 236.59 | 72.71 | 45.26 | 36.72 |
| 3072 | 372.85 | 236.37 | 72.75 | 45.25 | 36.73 |
| 3074 | 372.22 | 236.17 | 72.81 | 45.25 | 36.73 |
| 3076 | 371.47 | 235.95 | 72.86 | 45.26 | 36.73 |
| 3078 | 370.82 | 235.69 | 72.91 | 45.25 | 36.73 |

|      |        |        |       |       |       |
|------|--------|--------|-------|-------|-------|
| 3080 | 370.23 | 235.51 | 72.99 | 45.28 | 36.77 |
| 3082 | 369.58 | 235.28 | 73.02 | 45.26 | 36.77 |
| 3084 | 368.86 | 235.08 | 73.09 | 45.28 | 36.78 |
| 3086 | 368.21 | 234.8  | 73.12 | 45.24 | 36.75 |
| 3088 | 367.6  | 234.6  | 73.17 | 45.25 | 36.75 |
| 3090 | 366.96 | 234.38 | 73.22 | 45.24 | 36.74 |
| 3092 | 366.23 | 234.12 | 73.25 | 45.21 | 36.74 |
| 3094 | 365.6  | 233.91 | 73.32 | 45.21 | 36.75 |
| 3096 | 364.95 | 233.65 | 73.31 | 45.16 | 36.71 |
| 3098 | 364.32 | 233.43 | 73.37 | 45.14 | 36.7  |
| 3100 | 363.7  | 233.19 | 73.4  | 45.14 | 36.7  |
| 3102 | 362.99 | 232.94 | 73.47 | 45.15 | 36.73 |
| 3104 | 362.36 | 232.72 | 73.49 | 45.12 | 36.68 |
| 3106 | 361.75 | 232.5  | 73.54 | 45.13 | 36.69 |
| 3108 | 361    | 232.24 | 73.55 | 45.11 | 36.67 |
| 3110 | 360.42 | 232.04 | 73.65 | 45.14 | 36.7  |
| 3112 | 359.8  | 231.8  | 73.68 | 45.13 | 36.68 |
| 3114 | 359.2  | 231.58 | 73.72 | 45.11 | 36.67 |
| 3116 | 358.55 | 231.31 | 73.72 | 45.07 | 36.63 |
| 3118 | 357.83 | 231.03 | 73.75 | 45.04 | 36.62 |
| 3120 | 357.22 | 230.8  | 73.79 | 45.03 | 36.61 |
| 3122 | 356.62 | 230.56 | 73.83 | 45.01 | 36.6  |
| 3124 | 356.01 | 230.33 | 73.86 | 45    | 36.59 |
| 3126 | 355.28 | 230.03 | 73.86 | 44.96 | 36.55 |
| 3128 | 354.69 | 229.82 | 73.93 | 44.96 | 36.54 |
| 3130 | 354.09 | 229.61 | 73.98 | 44.95 | 36.54 |
| 3132 | 353.38 | 229.38 | 74.01 | 44.95 | 36.54 |
| 3134 | 352.8  | 229.11 | 74.06 | 44.96 | 36.53 |
| 3136 | 352.21 | 228.88 | 74.1  | 44.95 | 36.53 |
| 3138 | 351.61 | 228.65 | 74.12 | 44.94 | 36.52 |
| 3140 | 351.02 | 228.42 | 74.16 | 44.92 | 36.51 |
| 3142 | 350.33 | 228.14 | 74.19 | 44.92 | 36.5  |
| 3144 | 349.73 | 227.9  | 74.23 | 44.91 | 36.49 |
| 3146 | 349.14 | 227.67 | 74.25 | 44.89 | 36.48 |
| 3148 | 348.44 | 227.42 | 74.27 | 44.86 | 36.47 |
| 3150 | 347.87 | 227.15 | 74.31 | 44.85 | 36.47 |
| 3152 | 347.31 | 226.94 | 74.38 | 44.87 | 36.48 |
| 3154 | 346.75 | 226.75 | 74.44 | 44.89 | 36.5  |
| 3156 | 346.05 | 226.51 | 74.45 | 44.85 | 36.47 |
| 3158 | 345.42 | 226.19 | 74.45 | 44.81 | 36.42 |
| 3160 | 344.81 | 225.94 | 74.45 | 44.77 | 36.39 |
| 3162 | 344.15 | 225.71 | 74.5  | 44.78 | 36.39 |
| 3164 | 343.68 | 225.48 | 74.53 | 44.78 | 36.39 |
| 3166 | 343.01 | 225.2  | 74.56 | 44.77 | 36.38 |

|      |        |        |       |       |       |
|------|--------|--------|-------|-------|-------|
| 3168 | 342.44 | 224.98 | 74.6  | 44.75 | 36.37 |
| 3170 | 341.87 | 224.75 | 74.63 | 44.75 | 36.39 |
| 3172 | 341.2  | 224.51 | 74.65 | 44.74 | 36.36 |
| 3174 | 340.64 | 224.24 | 74.7  | 44.75 | 36.38 |
| 3176 | 340.07 | 223.99 | 74.73 | 44.72 | 36.35 |
| 3178 | 339.48 | 223.74 | 74.74 | 44.7  | 36.34 |
| 3180 | 338.84 | 223.54 | 74.8  | 44.72 | 36.37 |
| 3182 | 338.24 | 223.23 | 74.8  | 44.68 | 36.31 |
| 3184 | 337.67 | 222.97 | 74.82 | 44.65 | 36.3  |
| 3186 | 337.14 | 222.78 | 74.88 | 44.67 | 36.32 |
| 3188 | 336.51 | 222.56 | 74.91 | 44.66 | 36.31 |
| 3190 | 335.95 | 222.3  | 74.95 | 44.66 | 36.31 |
| 3192 | 335.38 | 222.05 | 74.96 | 44.65 | 36.28 |
| 3194 | 334.82 | 221.82 | 74.98 | 44.65 | 36.27 |
| 3196 | 334.13 | 221.52 | 74.99 | 44.62 | 36.23 |
| 3198 | 333.58 | 221.29 | 75.03 | 44.61 | 36.24 |
| 3200 | 333.03 | 221.04 | 75.04 | 44.59 | 36.21 |
| 3202 | 332.48 | 220.81 | 75.08 | 44.6  | 36.21 |
| 3204 | 331.84 | 220.56 | 75.09 | 44.58 | 36.21 |
| 3206 | 331.29 | 220.27 | 75.12 | 44.55 | 36.19 |
| 3208 | 330.74 | 220.04 | 75.14 | 44.53 | 36.18 |
| 3210 | 330.18 | 219.8  | 75.16 | 44.52 | 36.17 |
| 3212 | 329.54 | 219.52 | 75.18 | 44.5  | 36.16 |
| 3214 | 328.98 | 219.25 | 75.19 | 44.47 | 36.13 |
| 3216 | 328.44 | 219.01 | 75.21 | 44.46 | 36.11 |
| 3218 | 327.89 | 218.77 | 75.21 | 44.43 | 36.1  |
| 3220 | 327.32 | 218.48 | 75.22 | 44.4  | 36.07 |
| 3222 | 326.73 | 218.25 | 75.27 | 44.44 | 36.09 |
| 3224 | 326.2  | 218.02 | 75.31 | 44.44 | 36.08 |
| 3226 | 325.66 | 217.78 | 75.32 | 44.42 | 36.08 |
| 3228 | 325.05 | 217.57 | 75.36 | 44.43 | 36.08 |
| 3230 | 324.51 | 217.28 | 75.36 | 44.4  | 36.05 |
| 3232 | 323.97 | 217.04 | 75.38 | 44.39 | 36.04 |
| 3234 | 323.42 | 216.79 | 75.39 | 44.37 | 36.03 |
| 3236 | 322.79 | 216.5  | 75.4  | 44.34 | 36.01 |
| 3238 | 322.27 | 216.26 | 75.42 | 44.31 | 36    |
| 3240 | 321.75 | 216.03 | 75.44 | 44.31 | 35.99 |
| 3242 | 321.22 | 215.78 | 75.45 | 44.28 | 35.97 |
| 3244 | 320.6  | 215.53 | 75.46 | 44.27 | 35.96 |
| 3246 | 320.06 | 215.25 | 75.47 | 44.25 | 35.94 |
| 3248 | 319.54 | 215    | 75.49 | 44.24 | 35.93 |
| 3250 | 319.03 | 214.76 | 75.51 | 44.23 | 35.92 |
| 3252 | 318.42 | 214.49 | 75.53 | 44.22 | 35.9  |
| 3254 | 317.91 | 214.24 | 75.54 | 44.21 | 35.9  |

|      |        |        |       |       |       |
|------|--------|--------|-------|-------|-------|
| 3256 | 317.39 | 214    | 75.57 | 44.23 | 35.9  |
| 3258 | 316.86 | 213.75 | 75.57 | 44.19 | 35.88 |
| 3260 | 316.33 | 213.49 | 75.56 | 44.16 | 35.85 |
| 3262 | 315.75 | 213.23 | 75.58 | 44.15 | 35.84 |
| 3264 | 315.23 | 212.97 | 75.59 | 44.13 | 35.83 |
| 3266 | 314.7  | 212.71 | 75.59 | 44.11 | 35.8  |
| 3268 | 314.12 | 212.49 | 75.62 | 44.12 | 35.81 |
| 3270 | 313.6  | 212.19 | 75.61 | 44.08 | 35.77 |
| 3272 | 313.1  | 211.96 | 75.63 | 44.07 | 35.77 |
| 3274 | 312.59 | 211.71 | 75.64 | 44.05 | 35.76 |
| 3276 | 312.04 | 211.44 | 75.61 | 43.99 | 35.72 |
| 3278 | 311.43 | 211.13 | 75.61 | 43.96 | 35.69 |
| 3280 | 310.93 | 210.88 | 75.61 | 43.94 | 35.67 |
| 3282 | 310.43 | 210.64 | 75.62 | 43.93 | 35.68 |
| 3284 | 309.89 | 210.46 | 75.69 | 43.96 | 35.71 |
| 3286 | 309.37 | 210.14 | 75.65 | 43.91 | 35.65 |
| 3288 | 308.9  | 209.94 | 75.71 | 43.92 | 35.66 |
| 3290 | 308.36 | 209.64 | 75.66 | 43.86 | 35.61 |
| 3292 | 307.78 | 209.39 | 75.66 | 43.85 | 35.6  |
| 3294 | 307.29 | 209.12 | 75.7  | 43.85 | 35.61 |
| 3296 | 306.8  | 208.9  | 75.71 | 43.84 | 35.61 |
| 3298 | 306.31 | 208.67 | 75.71 | 43.82 | 35.59 |
| 3300 | 305.84 | 208.44 | 75.74 | 43.83 | 35.6  |
| 3302 | 305.28 | 208.18 | 75.75 | 43.83 | 35.58 |
| 3304 | 304.79 | 207.95 | 75.78 | 43.83 | 35.58 |
| 3306 | 304.26 | 207.66 | 75.73 | 43.76 | 35.53 |
| 3308 | 303.67 | 207.36 | 75.72 | 43.73 | 35.5  |
| 3310 | 303.21 | 207.16 | 75.76 | 43.75 | 35.52 |
| 3312 | 302.71 | 206.9  | 75.75 | 43.73 | 35.5  |
| 3314 | 302.24 | 206.66 | 75.76 | 43.72 | 35.49 |
| 3316 | 301.76 | 206.43 | 75.77 | 43.72 | 35.51 |
| 3318 | 301.19 | 206.14 | 75.77 | 43.7  | 35.49 |
| 3320 | 300.73 | 205.93 | 75.8  | 43.7  | 35.49 |
| 3322 | 300.26 | 205.69 | 75.81 | 43.68 | 35.48 |
| 3324 | 299.78 | 205.45 | 75.8  | 43.66 | 35.47 |
| 3326 | 299.23 | 205.17 | 75.81 | 43.64 | 35.46 |
| 3328 | 298.73 | 204.91 | 75.79 | 43.61 | 35.44 |
| 3330 | 298.27 | 204.68 | 75.8  | 43.6  | 35.42 |
| 3332 | 297.7  | 204.44 | 75.81 | 43.58 | 35.41 |
| 3334 | 297.2  | 204.12 | 75.77 | 43.52 | 35.35 |
| 3336 | 296.72 | 203.87 | 75.77 | 43.5  | 35.33 |
| 3338 | 296.24 | 203.62 | 75.76 | 43.48 | 35.31 |
| 3340 | 295.79 | 203.39 | 75.78 | 43.48 | 35.32 |
| 3342 | 295.29 | 203.16 | 75.82 | 43.51 | 35.35 |

|      |        |        |       |       |       |
|------|--------|--------|-------|-------|-------|
| 3344 | 294.8  | 202.9  | 75.8  | 43.46 | 35.33 |
| 3346 | 294.34 | 202.68 | 75.82 | 43.46 | 35.32 |
| 3348 | 293.81 | 202.45 | 75.83 | 43.46 | 35.31 |
| 3350 | 293.34 | 202.17 | 75.83 | 43.45 | 35.3  |
| 3352 | 292.88 | 201.94 | 75.82 | 43.44 | 35.28 |
| 3354 | 292.4  | 201.68 | 75.8  | 43.4  | 35.23 |
| 3356 | 291.87 | 201.4  | 75.81 | 43.4  | 35.24 |
| 3358 | 291.43 | 201.18 | 75.82 | 43.4  | 35.24 |
| 3360 | 290.96 | 200.94 | 75.82 | 43.39 | 35.23 |
| 3362 | 290.49 | 200.69 | 75.81 | 43.37 | 35.22 |
| 3364 | 289.98 | 200.48 | 75.83 | 43.36 | 35.21 |
| 3366 | 289.51 | 200.19 | 75.81 | 43.34 | 35.2  |
| 3368 | 289.07 | 199.97 | 75.82 | 43.34 | 35.19 |
| 3370 | 288.63 | 199.73 | 75.83 | 43.34 | 35.2  |
| 3372 | 288.11 | 199.45 | 75.83 | 43.32 | 35.19 |
| 3374 | 287.63 | 199.19 | 75.81 | 43.28 | 35.17 |
| 3376 | 287.15 | 198.92 | 75.79 | 43.24 | 35.13 |
| 3378 | 286.74 | 198.74 | 75.82 | 43.25 | 35.14 |
| 3380 | 286.2  | 198.49 | 75.82 | 43.24 | 35.13 |
| 3382 | 285.76 | 198.22 | 75.8  | 43.23 | 35.12 |
| 3384 | 285.29 | 197.96 | 75.78 | 43.19 | 35.07 |
| 3386 | 284.87 | 197.74 | 75.81 | 43.2  | 35.09 |
| 3388 | 284.33 | 197.43 | 75.77 | 43.16 | 35.05 |
| 3390 | 283.89 | 197.21 | 75.77 | 43.16 | 35.05 |
| 3392 | 283.44 | 196.97 | 75.76 | 43.13 | 35.02 |
| 3394 | 283.01 | 196.75 | 75.77 | 43.14 | 35.03 |
| 3396 | 282.57 | 196.52 | 75.76 | 43.13 | 35.03 |
| 3398 | 282.06 | 196.24 | 75.76 | 43.1  | 35    |
| 3400 | 281.62 | 196.02 | 75.75 | 43.08 | 34.98 |
| 3402 | 281.19 | 195.78 | 75.76 | 43.09 | 34.99 |
| 3404 | 280.67 | 195.54 | 75.74 | 43.06 | 34.96 |
| 3406 | 280.23 | 195.24 | 75.71 | 43.02 | 34.93 |
| 3408 | 279.79 | 195.01 | 75.7  | 43    | 34.91 |
| 3410 | 279.34 | 194.76 | 75.68 | 42.97 | 34.88 |
| 3412 | 278.84 | 194.5  | 75.68 | 42.96 | 34.88 |
| 3414 | 278.39 | 194.25 | 75.67 | 42.93 | 34.85 |
| 3416 | 278    | 194.05 | 75.68 | 42.94 | 34.85 |
| 3418 | 277.58 | 193.84 | 75.69 | 42.94 | 34.86 |
| 3420 | 277.07 | 193.6  | 75.68 | 42.91 | 34.85 |
| 3422 | 276.67 | 193.33 | 75.68 | 42.91 | 34.83 |
| 3424 | 276.21 | 193.08 | 75.63 | 42.86 | 34.79 |
| 3426 | 275.81 | 192.84 | 75.62 | 42.84 | 34.77 |
| 3428 | 275.29 | 192.6  | 75.6  | 42.82 | 34.75 |
| 3430 | 274.85 | 192.32 | 75.58 | 42.82 | 34.74 |

|      |        |        |       |       |       |
|------|--------|--------|-------|-------|-------|
| 3432 | 274.44 | 192.09 | 75.58 | 42.8  | 34.71 |
| 3434 | 274    | 191.84 | 75.54 | 42.77 | 34.67 |
| 3436 | 273.5  | 191.58 | 75.55 | 42.77 | 34.66 |
| 3438 | 273.08 | 191.33 | 75.51 | 42.71 | 34.63 |
| 3440 | 272.67 | 191.11 | 75.5  | 42.7  | 34.61 |
| 3442 | 272.22 | 190.86 | 75.47 | 42.67 | 34.58 |
| 3444 | 271.74 | 190.62 | 75.46 | 42.65 | 34.56 |
| 3446 | 271.36 | 190.4  | 75.5  | 42.68 | 34.58 |
| 3448 | 270.96 | 190.19 | 75.5  | 42.68 | 34.58 |
| 3450 | 270.53 | 189.95 | 75.46 | 42.63 | 34.55 |
| 3452 | 270.05 | 189.66 | 75.46 | 42.62 | 34.55 |
| 3454 | 269.65 | 189.45 | 75.45 | 42.61 | 34.53 |
| 3456 | 269.24 | 189.23 | 75.44 | 42.6  | 34.52 |
| 3458 | 268.81 | 188.98 | 75.42 | 42.56 | 34.48 |
| 3460 | 268.36 | 188.77 | 75.42 | 42.57 | 34.49 |
| 3462 | 267.95 | 188.51 | 75.41 | 42.56 | 34.47 |
| 3464 | 267.53 | 188.28 | 75.4  | 42.54 | 34.46 |
| 3466 | 267.13 | 188.05 | 75.38 | 42.53 | 34.45 |
| 3468 | 266.66 | 187.83 | 75.37 | 42.52 | 34.43 |
| 3470 | 266.25 | 187.56 | 75.36 | 42.51 | 34.41 |
| 3472 | 265.86 | 187.34 | 75.35 | 42.5  | 34.41 |
| 3474 | 265.43 | 187.09 | 75.3  | 42.45 | 34.37 |
| 3476 | 264.97 | 186.83 | 75.28 | 42.43 | 34.33 |
| 3478 | 264.58 | 186.62 | 75.29 | 42.44 | 34.35 |
| 3480 | 264.17 | 186.37 | 75.26 | 42.41 | 34.31 |
| 3482 | 263.76 | 186.15 | 75.25 | 42.39 | 34.31 |
| 3484 | 263.3  | 185.92 | 75.23 | 42.37 | 34.27 |
| 3486 | 262.92 | 185.67 | 75.22 | 42.36 | 34.28 |
| 3488 | 262.52 | 185.44 | 75.21 | 42.35 | 34.26 |
| 3490 | 262.15 | 185.23 | 75.22 | 42.37 | 34.28 |
| 3492 | 261.75 | 184.97 | 75.17 | 42.31 | 34.23 |
| 3494 | 261.27 | 184.72 | 75.16 | 42.3  | 34.22 |
| 3496 | 260.92 | 184.53 | 75.19 | 42.31 | 34.23 |
| 3498 | 260.51 | 184.28 | 75.14 | 42.27 | 34.2  |
| 3500 | 260.11 | 184.04 | 75.11 | 42.25 | 34.18 |
| 3502 | 259.68 | 183.82 | 75.13 | 42.27 | 34.19 |
| 3504 | 259.26 | 183.56 | 75.08 | 42.22 | 34.14 |
| 3506 | 258.89 | 183.35 | 75.07 | 42.23 | 34.13 |
| 3508 | 258.44 | 183.14 | 75.06 | 42.21 | 34.12 |
| 3510 | 258.05 | 182.9  | 75.06 | 42.21 | 34.11 |
| 3512 | 257.64 | 182.65 | 75    | 42.17 | 34.08 |
| 3514 | 257.26 | 182.42 | 75.01 | 42.16 | 34.07 |
| 3516 | 256.9  | 182.23 | 75.01 | 42.17 | 34.08 |
| 3518 | 256.44 | 181.96 | 74.99 | 42.15 | 34.07 |



|      |        |        |       |       |       |
|------|--------|--------|-------|-------|-------|
| 3520 | 256.07 | 181.75 | 74.97 | 42.14 | 34.05 |
| 3522 | 255.67 | 181.51 | 74.94 | 42.1  | 34.01 |
| 3524 | 255.21 | 181.28 | 74.91 | 42.08 | 34.01 |
| 3526 | 254.86 | 181.04 | 74.9  | 42.08 | 34    |
| 3528 | 254.49 | 180.83 | 74.89 | 42.07 | 34.01 |
| 3530 | 254.06 | 180.56 | 74.83 | 42    | 33.93 |
| 3532 | 253.66 | 180.38 | 74.85 | 42.03 | 33.95 |
| 3534 | 253.26 | 180.12 | 74.83 | 42.02 | 33.94 |
| 3536 | 252.89 | 179.9  | 74.8  | 41.99 | 33.92 |
| 3538 | 252.49 | 179.66 | 74.77 | 41.95 | 33.9  |
| 3540 | 252.07 | 179.47 | 74.75 | 41.94 | 33.88 |
| 3542 | 251.71 | 179.22 | 74.75 | 41.93 | 33.89 |
| 3544 | 251.34 | 179    | 74.74 | 41.93 | 33.89 |
| 3546 | 250.96 | 178.78 | 74.7  | 41.91 | 33.87 |
| 3548 | 250.57 | 178.54 | 74.67 | 41.88 | 33.84 |
| 3550 | 250.16 | 178.3  | 74.66 | 41.88 | 33.83 |
| 3552 | 249.77 | 178.08 | 74.63 | 41.84 | 33.81 |
| 3554 | 249.39 | 177.86 | 74.6  | 41.82 | 33.78 |
| 3556 | 248.95 | 177.63 | 74.58 | 41.8  | 33.76 |
| 3558 | 248.59 | 177.4  | 74.58 | 41.82 | 33.76 |
| 3560 | 248.23 | 177.18 | 74.55 | 41.81 | 33.76 |
| 3562 | 247.87 | 176.96 | 74.53 | 41.79 | 33.74 |
| 3564 | 247.44 | 176.71 | 74.51 | 41.78 | 33.72 |
| 3566 | 247.07 | 176.49 | 74.49 | 41.76 | 33.71 |
| 3568 | 246.71 | 176.28 | 74.47 | 41.76 | 33.71 |
| 3570 | 246.34 | 176.07 | 74.45 | 41.73 | 33.69 |
| 3572 | 245.9  | 175.81 | 74.42 | 41.7  | 33.66 |
| 3574 | 245.54 | 175.6  | 74.4  | 41.68 | 33.65 |
| 3576 | 245.22 | 175.44 | 74.42 | 41.72 | 33.68 |
| 3578 | 244.83 | 175.19 | 74.37 | 41.67 | 33.63 |
| 3580 | 244.45 | 174.95 | 74.33 | 41.63 | 33.6  |
| 3582 | 244.04 | 174.7  | 74.3  | 41.61 | 33.59 |
| 3584 | 243.67 | 174.48 | 74.28 | 41.6  | 33.57 |
| 3586 | 243.32 | 174.28 | 74.27 | 41.59 | 33.56 |
| 3588 | 242.89 | 174.06 | 74.24 | 41.57 | 33.53 |
| 3590 | 242.53 | 173.81 | 74.21 | 41.56 | 33.52 |
| 3592 | 242.18 | 173.59 | 74.18 | 41.54 | 33.5  |
| 3594 | 241.82 | 173.38 | 74.16 | 41.53 | 33.49 |
| 3596 | 241.46 | 173.17 | 74.14 | 41.51 | 33.48 |
| 3598 | 241.03 | 172.9  | 74.1  | 41.48 | 33.44 |
| 3600 | 240.68 | 172.69 | 74.09 | 41.48 | 33.44 |
| 3602 | 240.32 | 172.46 | 74.04 | 41.44 | 33.41 |
| 3604 | 239.92 | 172.26 | 74.03 | 41.43 | 33.41 |
| 3606 | 239.57 | 172    | 74.01 | 41.41 | 33.4  |

|      |        |        |       |       |       |
|------|--------|--------|-------|-------|-------|
| 3608 | 239.21 | 171.8  | 73.98 | 41.39 | 33.38 |
| 3610 | 238.86 | 171.58 | 73.96 | 41.39 | 33.37 |
| 3612 | 238.51 | 171.38 | 73.94 | 41.36 | 33.35 |
| 3614 | 238.11 | 171.12 | 73.91 | 41.34 | 33.34 |
| 3616 | 237.76 | 170.92 | 73.89 | 41.33 | 33.33 |
| 3618 | 237.41 | 170.71 | 73.87 | 41.32 | 33.32 |
| 3620 | 237    | 170.5  | 73.84 | 41.32 | 33.31 |
| 3622 | 236.62 | 170.21 | 73.77 | 41.27 | 33.26 |
| 3624 | 236.3  | 170.02 | 73.77 | 41.27 | 33.27 |
| 3626 | 235.96 | 169.81 | 73.73 | 41.25 | 33.25 |
| 3628 | 235.55 | 169.57 | 73.71 | 41.24 | 33.24 |
| 3630 | 235.22 | 169.38 | 73.7  | 41.24 | 33.24 |
| 3632 | 234.87 | 169.17 | 73.68 | 41.23 | 33.23 |
| 3634 | 234.54 | 168.96 | 73.65 | 41.22 | 33.21 |
| 3636 | 234.19 | 168.75 | 73.63 | 41.2  | 33.2  |
| 3638 | 233.8  | 168.5  | 73.59 | 41.18 | 33.19 |
| 3640 | 233.46 | 168.31 | 73.58 | 41.18 | 33.19 |
| 3642 | 233.11 | 168.08 | 73.53 | 41.14 | 33.16 |
| 3644 | 232.73 | 167.88 | 73.51 | 41.12 | 33.15 |
| 3646 | 232.42 | 167.65 | 73.5  | 41.13 | 33.16 |
| 3648 | 232.05 | 167.43 | 73.45 | 41.09 | 33.13 |
| 3650 | 231.72 | 167.24 | 73.44 | 41.09 | 33.13 |
| 3652 | 231.31 | 166.97 | 73.4  | 41.05 | 33.1  |
| 3654 | 230.97 | 166.76 | 73.36 | 41.02 | 33.07 |
| 3656 | 230.63 | 166.56 | 73.33 | 41.02 | 33.06 |
| 3658 | 230.28 | 166.35 | 73.29 | 40.99 | 33.02 |
| 3660 | 229.91 | 166.15 | 73.28 | 40.99 | 33.03 |
| 3662 | 229.56 | 165.88 | 73.24 | 40.96 | 33.01 |
| 3664 | 229.24 | 165.7  | 73.22 | 40.97 | 33.02 |
| 3666 | 228.93 | 165.5  | 73.19 | 40.95 | 33.01 |
| 3668 | 228.53 | 165.26 | 73.16 | 40.92 | 32.98 |
| 3670 | 228.19 | 165.04 | 73.13 | 40.9  | 32.97 |
| 3672 | 227.86 | 164.85 | 73.1  | 40.89 | 32.96 |
| 3674 | 227.52 | 164.63 | 73.05 | 40.86 | 32.94 |
| 3676 | 227.15 | 164.41 | 73.04 | 40.86 | 32.94 |
| 3678 | 226.82 | 164.21 | 73.01 | 40.84 | 32.91 |
| 3680 | 226.48 | 163.99 | 72.97 | 40.8  | 32.88 |
| 3682 | 226.17 | 163.8  | 72.95 | 40.8  | 32.89 |
| 3684 | 225.85 | 163.6  | 72.93 | 40.79 | 32.88 |
| 3686 | 225.47 | 163.38 | 72.9  | 40.79 | 32.87 |
| 3688 | 225.15 | 163.18 | 72.87 | 40.78 | 32.86 |
| 3690 | 224.82 | 162.98 | 72.84 | 40.77 | 32.84 |
| 3692 | 224.48 | 162.79 | 72.84 | 40.78 | 32.86 |
| 3694 | 224.15 | 162.58 | 72.82 | 40.78 | 32.85 |

|      |        |        |       |       |       |
|------|--------|--------|-------|-------|-------|
| 3696 | 223.83 | 162.38 | 72.79 | 40.76 | 32.85 |
| 3698 | 223.51 | 162.17 | 72.76 | 40.74 | 32.83 |
| 3700 | 223.14 | 161.94 | 72.7  | 40.7  | 32.8  |
| 3702 | 222.78 | 161.7  | 72.66 | 40.67 | 32.77 |
| 3704 | 222.45 | 161.49 | 72.62 | 40.63 | 32.75 |
| 3706 | 222.14 | 161.29 | 72.59 | 40.62 | 32.73 |
| 3708 | 221.86 | 161.14 | 72.61 | 40.66 | 32.76 |
| 3710 | 221.51 | 160.92 | 72.59 | 40.66 | 32.77 |
| 3712 | 221.15 | 160.67 | 72.52 | 40.6  | 32.72 |
| 3714 | 220.84 | 160.49 | 72.49 | 40.59 | 32.71 |
| 3716 | 220.51 | 160.32 | 72.5  | 40.6  | 32.73 |
| 3718 | 220.14 | 160.04 | 72.42 | 40.56 | 32.68 |
| 3720 | 219.83 | 159.84 | 72.39 | 40.54 | 32.66 |
| 3722 | 219.54 | 159.67 | 72.39 | 40.56 | 32.68 |
| 3724 | 219.19 | 159.44 | 72.33 | 40.51 | 32.63 |
| 3726 | 218.79 | 159.17 | 72.26 | 40.47 | 32.61 |
| 3728 | 218.5  | 158.99 | 72.24 | 40.46 | 32.59 |
| 3730 | 218.18 | 158.79 | 72.2  | 40.44 | 32.58 |
| 3732 | 217.83 | 158.6  | 72.19 | 40.45 | 32.58 |
| 3734 | 217.52 | 158.36 | 72.15 | 40.41 | 32.56 |
| 3736 | 217.23 | 158.17 | 72.12 | 40.41 | 32.57 |
| 3738 | 216.91 | 157.98 | 72.08 | 40.38 | 32.54 |
| 3740 | 216.54 | 157.78 | 72.04 | 40.37 | 32.52 |
| 3742 | 216.23 | 157.55 | 72.02 | 40.36 | 32.52 |
| 3744 | 215.93 | 157.34 | 71.98 | 40.33 | 32.49 |
| 3746 | 215.63 | 157.17 | 71.96 | 40.34 | 32.5  |
| 3748 | 215.35 | 157    | 71.97 | 40.36 | 32.52 |
| 3750 | 214.99 | 156.75 | 71.92 | 40.33 | 32.47 |
| 3752 | 214.68 | 156.56 | 71.88 | 40.3  | 32.47 |
| 3754 | 214.35 | 156.34 | 71.83 | 40.26 | 32.43 |
| 3756 | 214.01 | 156.16 | 71.8  | 40.25 | 32.44 |
| 3758 | 213.73 | 155.96 | 71.79 | 40.26 | 32.45 |
| 3760 | 213.41 | 155.75 | 71.73 | 40.23 | 32.42 |
| 3762 | 213.09 | 155.54 | 71.68 | 40.2  | 32.39 |
| 3764 | 212.77 | 155.33 | 71.62 | 40.16 | 32.35 |
| 3766 | 212.41 | 155.11 | 71.59 | 40.14 | 32.34 |
| 3768 | 212.12 | 154.92 | 71.56 | 40.13 | 32.33 |
| 3770 | 211.82 | 154.74 | 71.54 | 40.12 | 32.32 |
| 3772 | 211.45 | 154.52 | 71.48 | 40.08 | 32.29 |
| 3774 | 211.17 | 154.31 | 71.46 | 40.1  | 32.31 |
| 3776 | 210.86 | 154.11 | 71.42 | 40.07 | 32.27 |
| 3778 | 210.59 | 153.92 | 71.39 | 40.06 | 32.28 |
| 3780 | 210.22 | 153.72 | 71.34 | 40.03 | 32.25 |
| 3782 | 209.93 | 153.52 | 71.32 | 40.03 | 32.25 |

|      |        |        |       |       |       |
|------|--------|--------|-------|-------|-------|
| 3784 | 209.64 | 153.33 | 71.3  | 40.02 | 32.25 |
| 3786 | 209.35 | 153.13 | 71.26 | 40    | 32.22 |
| 3788 | 209.05 | 152.94 | 71.22 | 39.98 | 32.2  |
| 3790 | 208.7  | 152.69 | 71.16 | 39.95 | 32.18 |
| 3792 | 208.41 | 152.51 | 71.12 | 39.93 | 32.16 |
| 3794 | 208.12 | 152.32 | 71.1  | 39.91 | 32.15 |
| 3796 | 207.8  | 152.14 | 71.09 | 39.93 | 32.17 |
| 3798 | 207.48 | 151.89 | 71.01 | 39.89 | 32.12 |
| 3800 | 207.2  | 151.71 | 70.99 | 39.89 | 32.11 |
| 3802 | 206.92 | 151.54 | 70.98 | 39.9  | 32.13 |
| 3804 | 206.63 | 151.35 | 70.93 | 39.87 | 32.1  |
| 3806 | 206.31 | 151.16 | 70.92 | 39.89 | 32.12 |
| 3808 | 206.01 | 150.95 | 70.87 | 39.85 | 32.08 |
| 3810 | 205.73 | 150.76 | 70.83 | 39.83 | 32.08 |
| 3812 | 205.47 | 150.61 | 70.83 | 39.85 | 32.1  |
| 3814 | 205.14 | 150.4  | 70.8  | 39.82 | 32.09 |
| 3816 | 204.84 | 150.2  | 70.74 | 39.78 | 32.07 |
| 3818 | 204.51 | 149.98 | 70.67 | 39.73 | 32.01 |
| 3820 | 204.18 | 149.8  | 70.64 | 39.73 | 32.02 |
| 3822 | 203.9  | 149.59 | 70.61 | 39.73 | 32.02 |
| 3824 | 203.63 | 149.41 | 70.59 | 39.72 | 32    |
| 3826 | 203.38 | 149.25 | 70.58 | 39.73 | 32.01 |
| 3828 | 203.04 | 149.02 | 70.54 | 39.71 | 31.99 |
| 3830 | 202.74 | 148.82 | 70.48 | 39.69 | 31.97 |
| 3832 | 202.48 | 148.65 | 70.48 | 39.7  | 31.97 |
| 3834 | 202.19 | 148.45 | 70.43 | 39.67 | 31.97 |
| 3836 | 201.87 | 148.27 | 70.39 | 39.65 | 31.94 |
| 3838 | 201.61 | 148.08 | 70.37 | 39.66 | 31.95 |
| 3840 | 201.33 | 147.89 | 70.33 | 39.65 | 31.93 |
| 3842 | 201.05 | 147.71 | 70.29 | 39.63 | 31.91 |
| 3844 | 200.75 | 147.52 | 70.25 | 39.6  | 31.9  |
| 3846 | 200.4  | 147.29 | 70.19 | 39.55 | 31.85 |
| 3848 | 200.13 | 147.11 | 70.15 | 39.54 | 31.86 |
| 3850 | 199.89 | 146.96 | 70.15 | 39.56 | 31.87 |
| 3852 | 199.59 | 146.77 | 70.1  | 39.52 | 31.85 |
| 3854 | 199.27 | 146.56 | 70.07 | 39.52 | 31.85 |
| 3856 | 199.01 | 146.39 | 70.04 | 39.51 | 31.86 |
| 3858 | 198.73 | 146.21 | 70.01 | 39.5  | 31.84 |
| 3860 | 198.4  | 146.01 | 69.96 | 39.47 | 31.81 |
| 3862 | 198.13 | 145.8  | 69.93 | 39.47 | 31.8  |
| 3864 | 197.85 | 145.62 | 69.89 | 39.46 | 31.79 |
| 3866 | 197.58 | 145.43 | 69.85 | 39.45 | 31.78 |
| 3868 | 197.31 | 145.25 | 69.82 | 39.43 | 31.77 |
| 3870 | 196.99 | 145.07 | 69.78 | 39.41 | 31.77 |

|      |        |        |       |       |       |
|------|--------|--------|-------|-------|-------|
| 3872 | 196.72 | 144.86 | 69.74 | 39.4  | 31.75 |
| 3874 | 196.45 | 144.69 | 69.7  | 39.38 | 31.73 |
| 3876 | 196.12 | 144.52 | 69.64 | 39.36 | 31.71 |
| 3878 | 195.83 | 144.27 | 69.59 | 39.33 | 31.67 |
| 3880 | 195.53 | 144.07 | 69.52 | 39.28 | 31.64 |
| 3882 | 195.29 | 143.92 | 69.51 | 39.3  | 31.65 |
| 3884 | 194.96 | 143.72 | 69.46 | 39.26 | 31.62 |
| 3886 | 194.72 | 143.52 | 69.42 | 39.25 | 31.61 |
| 3888 | 194.45 | 143.33 | 69.38 | 39.23 | 31.61 |
| 3890 | 194.2  | 143.17 | 69.37 | 39.23 | 31.62 |
| 3892 | 193.9  | 142.97 | 69.35 | 39.23 | 31.62 |
| 3894 | 193.63 | 142.79 | 69.29 | 39.19 | 31.59 |
| 3896 | 193.35 | 142.61 | 69.23 | 39.17 | 31.57 |
| 3898 | 193.11 | 142.46 | 69.23 | 39.18 | 31.58 |
| 3900 | 192.81 | 142.28 | 69.17 | 39.15 | 31.55 |
| 3902 | 192.51 | 142.06 | 69.12 | 39.13 | 31.53 |
| 3904 | 192.23 | 141.85 | 69.06 | 39.07 | 31.5  |
| 3906 | 192.02 | 141.71 | 69.05 | 39.1  | 31.51 |
| 3908 | 191.69 | 141.53 | 69.01 | 39.08 | 31.49 |
| 3910 | 191.46 | 141.35 | 69    | 39.1  | 31.51 |
| 3912 | 191.16 | 141.13 | 68.92 | 39.04 | 31.45 |
| 3914 | 190.94 | 140.99 | 68.92 | 39.07 | 31.48 |
| 3916 | 190.64 | 140.84 | 68.89 | 39.07 | 31.48 |
| 3918 | 190.39 | 140.62 | 68.86 | 39.05 | 31.46 |
| 3920 | 190.13 | 140.45 | 68.82 | 39.04 | 31.45 |
| 3922 | 189.87 | 140.27 | 68.77 | 39.02 | 31.44 |
| 3924 | 189.56 | 140.06 | 68.73 | 38.99 | 31.42 |
| 3926 | 189.31 | 139.89 | 68.68 | 38.96 | 31.41 |
| 3928 | 189.02 | 139.68 | 68.61 | 38.91 | 31.35 |
| 3930 | 188.73 | 139.51 | 68.57 | 38.89 | 31.33 |
| 3932 | 188.53 | 139.39 | 68.58 | 38.92 | 31.36 |
| 3934 | 188.24 | 139.18 | 68.54 | 38.91 | 31.36 |
| 3936 | 187.96 | 138.98 | 68.47 | 38.85 | 31.32 |
| 3938 | 187.72 | 138.83 | 68.46 | 38.86 | 31.32 |
| 3940 | 187.44 | 138.65 | 68.42 | 38.86 | 31.32 |
| 3942 | 187.17 | 138.47 | 68.37 | 38.84 | 31.31 |
| 3944 | 186.93 | 138.3  | 68.34 | 38.82 | 31.29 |
| 3946 | 186.65 | 138.09 | 68.25 | 38.76 | 31.24 |
| 3948 | 186.41 | 137.96 | 68.26 | 38.79 | 31.27 |
| 3950 | 186.15 | 137.78 | 68.23 | 38.79 | 31.27 |
| 3952 | 185.9  | 137.61 | 68.19 | 38.78 | 31.26 |
| 3954 | 185.65 | 137.44 | 68.15 | 38.76 | 31.25 |
| 3956 | 185.39 | 137.27 | 68.12 | 38.74 | 31.24 |
| 3958 | 185.09 | 137.06 | 68.07 | 38.73 | 31.23 |

|      |        |        |       |       |       |
|------|--------|--------|-------|-------|-------|
| 3960 | 184.81 | 136.86 | 68    | 38.68 | 31.19 |
| 3962 | 184.57 | 136.7  | 67.98 | 38.68 | 31.17 |
| 3964 | 184.3  | 136.55 | 67.96 | 38.69 | 31.19 |
| 3966 | 184.05 | 136.37 | 67.92 | 38.68 | 31.16 |
| 3968 | 183.77 | 136.16 | 67.84 | 38.63 | 31.15 |
| 3970 | 183.54 | 136.02 | 67.82 | 38.64 | 31.14 |
| 3972 | 183.22 | 135.82 | 67.75 | 38.59 | 31.1  |
| 3974 | 182.99 | 135.62 | 67.71 | 38.57 | 31.08 |
| 3976 | 182.74 | 135.46 | 67.67 | 38.56 | 31.07 |
| 3978 | 182.5  | 135.29 | 67.63 | 38.55 | 31.06 |
| 3980 | 182.22 | 135.09 | 67.59 | 38.53 | 31.05 |
| 3982 | 181.96 | 134.91 | 67.54 | 38.51 | 31.05 |
| 3984 | 181.7  | 134.73 | 67.48 | 38.48 | 31.02 |
| 3986 | 181.48 | 134.6  | 67.47 | 38.48 | 31.02 |
| 3988 | 181.19 | 134.4  | 67.42 | 38.44 | 30.99 |
| 3990 | 180.98 | 134.26 | 67.41 | 38.45 | 31.02 |
| 3992 | 180.77 | 134.14 | 67.39 | 38.46 | 31.04 |
| 3994 | 180.52 | 133.96 | 67.34 | 38.43 | 31    |
| 3996 | 180.24 | 133.8  | 67.3  | 38.42 | 31    |
| 3998 | 180    | 133.6  | 67.25 | 38.4  | 30.99 |
| 4000 | 179.8  | 133.48 | 67.26 | 38.43 | 31.02 |
| 4002 | 179.56 | 133.33 | 67.23 | 38.41 | 31    |
| 4004 | 179.27 | 133.12 | 67.18 | 38.4  | 30.98 |
| 4006 | 179.05 | 132.97 | 67.14 | 38.4  | 30.97 |
| 4008 | 178.77 | 132.77 | 67.06 | 38.35 | 30.93 |
| 4010 | 178.53 | 132.6  | 67.02 | 38.33 | 30.92 |
| 4012 | 178.29 | 132.47 | 67.01 | 38.33 | 30.92 |
| 4014 | 178.06 | 132.28 | 66.96 | 38.33 | 30.93 |
| 4016 | 177.8  | 132.09 | 66.9  | 38.29 | 30.88 |
| 4018 | 177.54 | 131.91 | 66.85 | 38.26 | 30.87 |
| 4020 | 177.28 | 131.76 | 66.81 | 38.25 | 30.86 |
| 4022 | 177.02 | 131.55 | 66.76 | 38.21 | 30.83 |
| 4024 | 176.81 | 131.41 | 66.73 | 38.2  | 30.83 |
| 4026 | 176.57 | 131.24 | 66.69 | 38.18 | 30.81 |
| 4028 | 176.31 | 131.07 | 66.66 | 38.18 | 30.82 |
| 4030 | 176.06 | 130.9  | 66.6  | 38.15 | 30.8  |
| 4032 | 175.85 | 130.76 | 66.58 | 38.15 | 30.8  |
| 4034 | 175.65 | 130.62 | 66.56 | 38.15 | 30.8  |
| 4036 | 175.38 | 130.48 | 66.54 | 38.15 | 30.79 |
| 4038 | 175.13 | 130.27 | 66.47 | 38.12 | 30.77 |
| 4040 | 174.87 | 130.1  | 66.42 | 38.08 | 30.75 |
| 4042 | 174.66 | 129.96 | 66.39 | 38.08 | 30.75 |
| 4044 | 174.4  | 129.77 | 66.36 | 38.08 | 30.74 |
| 4046 | 174.18 | 129.61 | 66.32 | 38.07 | 30.73 |

|      |        |        |       |       |       |
|------|--------|--------|-------|-------|-------|
| 4048 | 173.95 | 129.46 | 66.28 | 38.06 | 30.73 |
| 4050 | 173.72 | 129.31 | 66.25 | 38.05 | 30.71 |
| 4052 | 173.51 | 129.16 | 66.22 | 38.05 | 30.71 |
| 4054 | 173.24 | 128.98 | 66.18 | 38.04 | 30.69 |
| 4056 | 173.03 | 128.83 | 66.16 | 38.03 | 30.69 |
| 4058 | 172.78 | 128.66 | 66.1  | 38    | 30.67 |
| 4060 | 172.53 | 128.52 | 66.08 | 38    | 30.68 |
| 4062 | 172.3  | 128.35 | 66.04 | 37.99 | 30.67 |
| 4064 | 172.07 | 128.19 | 66    | 37.97 | 30.65 |
| 4066 | 171.83 | 128.03 | 65.96 | 37.94 | 30.64 |
| 4068 | 171.56 | 127.85 | 65.91 | 37.92 | 30.62 |
| 4070 | 171.33 | 127.69 | 65.85 | 37.88 | 30.6  |
| 4072 | 171.11 | 127.54 | 65.83 | 37.89 | 30.6  |
| 4074 | 170.87 | 127.37 | 65.76 | 37.85 | 30.57 |
| 4076 | 170.61 | 127.2  | 65.71 | 37.83 | 30.54 |
| 4078 | 170.41 | 127.07 | 65.72 | 37.86 | 30.58 |
| 4080 | 170.17 | 126.91 | 65.67 | 37.84 | 30.56 |
| 4082 | 169.94 | 126.76 | 65.63 | 37.82 | 30.54 |
| 4084 | 169.71 | 126.62 | 65.6  | 37.82 | 30.56 |
| 4086 | 169.49 | 126.45 | 65.56 | 37.82 | 30.55 |
| 4088 | 169.27 | 126.3  | 65.53 | 37.8  | 30.53 |
| 4090 | 169.05 | 126.15 | 65.49 | 37.78 | 30.53 |
| 4092 | 168.88 | 126.05 | 65.5  | 37.82 | 30.56 |
| 4094 | 168.58 | 125.83 | 65.44 | 37.79 | 30.53 |
| 4096 | 168.39 | 125.73 | 65.4  | 37.78 | 30.52 |
| 4098 | 168.15 | 125.55 | 65.34 | 37.74 | 30.49 |
| 4100 | 167.9  | 125.38 | 65.3  | 37.73 | 30.47 |
| 4102 | 167.71 | 125.26 | 65.3  | 37.76 | 30.51 |
| 4104 | 167.47 | 125.09 | 65.26 | 37.73 | 30.48 |
| 4106 | 167.27 | 124.96 | 65.21 | 37.71 | 30.48 |
| 4108 | 166.98 | 124.75 | 65.14 | 37.67 | 30.44 |
| 4110 | 166.77 | 124.61 | 65.12 | 37.67 | 30.44 |
| 4112 | 166.55 | 124.45 | 65.06 | 37.66 | 30.42 |
| 4114 | 166.38 | 124.34 | 65.07 | 37.7  | 30.44 |
| 4116 | 166.1  | 124.16 | 65.01 | 37.66 | 30.41 |
| 4118 | 165.89 | 124    | 64.99 | 37.67 | 30.43 |
| 4120 | 165.64 | 123.82 | 64.9  | 37.61 | 30.38 |
| 4122 | 165.43 | 123.68 | 64.87 | 37.61 | 30.37 |
| 4124 | 165.17 | 123.52 | 64.82 | 37.59 | 30.34 |
| 4126 | 164.97 | 123.37 | 64.8  | 37.6  | 30.37 |
| 4128 | 164.79 | 123.26 | 64.79 | 37.6  | 30.39 |
| 4130 | 164.59 | 123.12 | 64.77 | 37.6  | 30.38 |
| 4132 | 164.38 | 122.97 | 64.73 | 37.57 | 30.36 |
| 4134 | 164.12 | 122.81 | 64.69 | 37.56 | 30.37 |

|      |        |        |       |       |       |
|------|--------|--------|-------|-------|-------|
| 4136 | 163.93 | 122.68 | 64.67 | 37.57 | 30.37 |
| 4138 | 163.68 | 122.49 | 64.58 | 37.51 | 30.3  |
| 4140 | 163.45 | 122.37 | 64.57 | 37.52 | 30.31 |
| 4142 | 163.24 | 122.19 | 64.52 | 37.53 | 30.32 |
| 4144 | 163.01 | 122.02 | 64.47 | 37.48 | 30.27 |
| 4146 | 162.85 | 121.92 | 64.46 | 37.5  | 30.3  |
| 4148 | 162.63 | 121.78 | 64.42 | 37.48 | 30.28 |
| 4150 | 162.35 | 121.59 | 64.35 | 37.44 | 30.24 |
| 4152 | 162.19 | 121.49 | 64.36 | 37.47 | 30.28 |
| 4154 | 161.94 | 121.3  | 64.28 | 37.42 | 30.23 |
| 4156 | 161.78 | 121.2  | 64.28 | 37.44 | 30.26 |
| 4158 | 161.49 | 120.99 | 64.2  | 37.41 | 30.22 |
| 4160 | 161.3  | 120.87 | 64.18 | 37.4  | 30.23 |
| 4162 | 161.11 | 120.74 | 64.16 | 37.41 | 30.21 |
| 4164 | 160.85 | 120.56 | 64.11 | 37.4  | 30.2  |
| 4166 | 160.65 | 120.44 | 64.08 | 37.4  | 30.19 |
| 4168 | 160.47 | 120.31 | 64.06 | 37.38 | 30.2  |
| 4170 | 160.27 | 120.19 | 64.03 | 37.39 | 30.22 |
| 4172 | 160.02 | 120    | 63.94 | 37.33 | 30.15 |
| 4174 | 159.77 | 119.82 | 63.9  | 37.31 | 30.13 |
| 4176 | 159.59 | 119.71 | 63.88 | 37.32 | 30.16 |
| 4178 | 159.36 | 119.55 | 63.82 | 37.28 | 30.11 |
| 4180 | 159.11 | 119.38 | 63.78 | 37.26 | 30.11 |
| 4182 | 158.91 | 119.24 | 63.74 | 37.24 | 30.1  |
| 4184 | 158.69 | 119.09 | 63.68 | 37.2  | 30.06 |
| 4186 | 158.5  | 118.96 | 63.66 | 37.21 | 30.07 |
| 4188 | 158.3  | 118.82 | 63.63 | 37.21 | 30.07 |
| 4190 | 158.06 | 118.66 | 63.58 | 37.2  | 30.06 |
| 4192 | 157.86 | 118.53 | 63.54 | 37.2  | 30.05 |
| 4194 | 157.68 | 118.41 | 63.51 | 37.19 | 30.04 |
| 4196 | 157.47 | 118.31 | 63.52 | 37.22 | 30.08 |
| 4198 | 157.23 | 118.11 | 63.43 | 37.17 | 30.02 |
| 4200 | 157.02 | 117.96 | 63.39 | 37.15 | 30.01 |
| 4202 | 156.86 | 117.85 | 63.38 | 37.16 | 30.03 |
| 4204 | 156.59 | 117.67 | 63.33 | 37.12 | 30    |
| 4206 | 156.42 | 117.56 | 63.3  | 37.15 | 30.01 |
| 4208 | 156.21 | 117.42 | 63.26 | 37.12 | 29.99 |
| 4210 | 156.03 | 117.3  | 63.25 | 37.13 | 30.02 |
| 4212 | 155.79 | 117.17 | 63.21 | 37.11 | 30    |
| 4214 | 155.57 | 116.97 | 63.13 | 37.07 | 29.95 |
| 4216 | 155.42 | 116.87 | 63.12 | 37.09 | 29.97 |
| 4218 | 155.23 | 116.75 | 63.11 | 37.09 | 29.98 |
| 4220 | 155    | 116.58 | 63.03 | 37.05 | 29.94 |
| 4222 | 154.78 | 116.43 | 63    | 37.04 | 29.93 |



|      |        |        |       |       |       |
|------|--------|--------|-------|-------|-------|
| 4224 | 154.58 | 116.29 | 62.96 | 37.02 | 29.92 |
| 4226 | 154.38 | 116.16 | 62.91 | 37.01 | 29.9  |
| 4228 | 154.17 | 116.02 | 62.87 | 37    | 29.89 |
| 4230 | 153.99 | 115.91 | 62.87 | 37.04 | 29.92 |
| 4232 | 153.78 | 115.76 | 62.84 | 37.03 | 29.93 |
| 4234 | 153.58 | 115.62 | 62.79 | 37.01 | 29.9  |
| 4236 | 153.35 | 115.49 | 62.74 | 36.98 | 29.88 |
| 4238 | 153.17 | 115.34 | 62.7  | 36.98 | 29.88 |
| 4240 | 152.97 | 115.2  | 62.67 | 36.97 | 29.86 |
| 4242 | 152.77 | 115.06 | 62.63 | 36.95 | 29.85 |
| 4244 | 152.56 | 114.94 | 62.6  | 36.95 | 29.85 |
| 4246 | 152.37 | 114.8  | 62.59 | 36.96 | 29.85 |
| 4248 | 152.18 | 114.68 | 62.54 | 36.95 | 29.85 |
| 4250 | 151.99 | 114.55 | 62.51 | 36.95 | 29.84 |
| 4252 | 151.76 | 114.42 | 62.46 | 36.93 | 29.84 |
| 4254 | 151.58 | 114.26 | 62.42 | 36.91 | 29.82 |
| 4256 | 151.35 | 114.11 | 62.37 | 36.89 | 29.79 |
| 4258 | 151.15 | 113.97 | 62.33 | 36.88 | 29.78 |
| 4260 | 150.97 | 113.85 | 62.29 | 36.87 | 29.76 |
| 4262 | 150.76 | 113.72 | 62.26 | 36.87 | 29.77 |
| 4264 | 150.55 | 113.57 | 62.22 | 36.83 | 29.74 |
| 4266 | 150.36 | 113.42 | 62.16 | 36.8  | 29.72 |
| 4268 | 150.18 | 113.29 | 62.13 | 36.79 | 29.72 |
| 4270 | 149.98 | 113.18 | 62.12 | 36.81 | 29.74 |
| 4272 | 149.78 | 113.04 | 62.06 | 36.79 | 29.72 |
| 4274 | 149.59 | 112.9  | 62.03 | 36.78 | 29.71 |
| 4276 | 149.41 | 112.8  | 62.03 | 36.81 | 29.74 |
| 4278 | 149.23 | 112.67 | 62    | 36.79 | 29.73 |
| 4280 | 149.02 | 112.53 | 61.93 | 36.76 | 29.69 |
| 4282 | 148.83 | 112.4  | 61.89 | 36.74 | 29.69 |
| 4284 | 148.64 | 112.28 | 61.85 | 36.74 | 29.68 |
| 4286 | 148.42 | 112.13 | 61.82 | 36.72 | 29.67 |
| 4288 | 148.21 | 111.98 | 61.76 | 36.7  | 29.64 |
| 4290 | 148.01 | 111.85 | 61.71 | 36.67 | 29.62 |
| 4292 | 147.8  | 111.73 | 61.67 | 36.66 | 29.61 |
| 4294 | 147.65 | 111.61 | 61.67 | 36.69 | 29.64 |
| 4296 | 147.48 | 111.49 | 61.62 | 36.66 | 29.61 |
| 4298 | 147.29 | 111.35 | 61.58 | 36.65 | 29.6  |
| 4300 | 147.09 | 111.21 | 61.56 | 36.65 | 29.61 |
| 4302 | 146.9  | 111.09 | 61.51 | 36.64 | 29.59 |
| 4304 | 146.71 | 110.96 | 61.48 | 36.63 | 29.6  |
| 4306 | 146.48 | 110.78 | 61.39 | 36.57 | 29.54 |
| 4308 | 146.27 | 110.68 | 61.37 | 36.58 | 29.55 |
| 4310 | 146.1  | 110.54 | 61.36 | 36.57 | 29.55 |

|      |        |        |       |       |       |
|------|--------|--------|-------|-------|-------|
| 4312 | 145.93 | 110.41 | 61.29 | 36.54 | 29.53 |
| 4314 | 145.74 | 110.29 | 61.25 | 36.53 | 29.52 |
| 4316 | 145.54 | 110.17 | 61.24 | 36.54 | 29.52 |
| 4318 | 145.38 | 110.07 | 61.22 | 36.56 | 29.55 |
| 4320 | 145.15 | 109.89 | 61.13 | 36.49 | 29.49 |
| 4322 | 144.96 | 109.76 | 61.09 | 36.47 | 29.47 |
| 4324 | 144.76 | 109.65 | 61.07 | 36.48 | 29.48 |
| 4326 | 144.58 | 109.5  | 61.02 | 36.46 | 29.46 |
| 4328 | 144.42 | 109.39 | 61    | 36.46 | 29.46 |
| 4330 | 144.27 | 109.3  | 60.98 | 36.47 | 29.46 |
| 4332 | 144.07 | 109.16 | 60.96 | 36.48 | 29.48 |
| 4334 | 143.85 | 109.01 | 60.89 | 36.43 | 29.44 |
| 4336 | 143.68 | 108.89 | 60.85 | 36.43 | 29.44 |
| 4338 | 143.5  | 108.77 | 60.82 | 36.41 | 29.43 |
| 4340 | 143.34 | 108.67 | 60.81 | 36.43 | 29.44 |
| 4342 | 143.12 | 108.51 | 60.76 | 36.4  | 29.42 |
| 4344 | 142.95 | 108.39 | 60.71 | 36.41 | 29.42 |
| 4346 | 142.77 | 108.27 | 60.69 | 36.39 | 29.41 |
| 4348 | 142.58 | 108.16 | 60.67 | 36.39 | 29.42 |
| 4350 | 142.4  | 108.01 | 60.61 | 36.37 | 29.4  |
| 4352 | 142.24 | 107.91 | 60.59 | 36.38 | 29.4  |
| 4354 | 142.08 | 107.79 | 60.56 | 36.38 | 29.39 |
| 4356 | 141.9  | 107.68 | 60.53 | 36.37 | 29.39 |
| 4358 | 141.64 | 107.5  | 60.43 | 36.32 | 29.33 |
| 4360 | 141.49 | 107.4  | 60.42 | 36.31 | 29.35 |
| 4362 | 141.35 | 107.31 | 60.42 | 36.34 | 29.37 |
| 4364 | 141.14 | 107.16 | 60.35 | 36.3  | 29.32 |
| 4366 | 140.94 | 107.04 | 60.32 | 36.29 | 29.32 |
| 4368 | 140.75 | 106.92 | 60.28 | 36.27 | 29.33 |
| 4370 | 140.58 | 106.8  | 60.25 | 36.26 | 29.32 |
| 4372 | 140.39 | 106.7  | 60.22 | 36.26 | 29.32 |
| 4374 | 140.22 | 106.56 | 60.18 | 36.26 | 29.31 |
| 4376 | 140.05 | 106.44 | 60.15 | 36.25 | 29.3  |
| 4378 | 139.84 | 106.28 | 60.08 | 36.19 | 29.25 |
| 4380 | 139.67 | 106.18 | 60.08 | 36.22 | 29.28 |
| 4382 | 139.5  | 106.07 | 60.04 | 36.22 | 29.28 |
| 4384 | 139.33 | 105.94 | 59.99 | 36.21 | 29.26 |
| 4386 | 139.14 | 105.81 | 59.94 | 36.19 | 29.25 |
| 4388 | 138.93 | 105.67 | 59.9  | 36.16 | 29.23 |
| 4390 | 138.76 | 105.54 | 59.85 | 36.14 | 29.19 |
| 4392 | 138.58 | 105.43 | 59.82 | 36.13 | 29.19 |
| 4394 | 138.43 | 105.31 | 59.78 | 36.12 | 29.19 |
| 4396 | 138.21 | 105.15 | 59.7  | 36.06 | 29.13 |
| 4398 | 138.04 | 105.03 | 59.68 | 36.08 | 29.15 |

|      |        |        |       |       |       |
|------|--------|--------|-------|-------|-------|
| 4400 | 137.87 | 104.93 | 59.64 | 36.07 | 29.14 |
| 4402 | 137.7  | 104.79 | 59.6  | 36.05 | 29.12 |
| 4404 | 137.49 | 104.64 | 59.54 | 36.02 | 29.1  |
| 4406 | 137.33 | 104.55 | 59.53 | 36.03 | 29.12 |
| 4408 | 137.16 | 104.43 | 59.49 | 36.02 | 29.11 |
| 4410 | 137.03 | 104.36 | 59.49 | 36.04 | 29.13 |
| 4412 | 136.83 | 104.23 | 59.44 | 36.02 | 29.11 |
| 4414 | 136.66 | 104.1  | 59.41 | 36.02 | 29.11 |
| 4416 | 136.52 | 104.01 | 59.38 | 36.02 | 29.11 |
| 4418 | 136.31 | 103.86 | 59.31 | 35.98 | 29.07 |
| 4420 | 136.14 | 103.74 | 59.29 | 35.98 | 29.07 |
| 4422 | 135.96 | 103.61 | 59.25 | 35.96 | 29.05 |
| 4424 | 135.84 | 103.54 | 59.24 | 36    | 29.09 |
| 4426 | 135.66 | 103.43 | 59.2  | 35.97 | 29.07 |
| 4428 | 135.5  | 103.31 | 59.16 | 35.95 | 29.07 |
| 4430 | 135.29 | 103.18 | 59.1  | 35.95 | 29.06 |
| 4432 | 135.12 | 103.05 | 59.06 | 35.92 | 29.03 |
| 4434 | 134.94 | 102.93 | 59.03 | 35.9  | 29    |
| 4436 | 134.76 | 102.83 | 59.01 | 35.9  | 29.02 |
| 4438 | 134.6  | 102.69 | 58.95 | 35.88 | 29.01 |
| 4440 | 134.43 | 102.58 | 58.91 | 35.87 | 29.01 |
| 4442 | 134.29 | 102.51 | 58.91 | 35.88 | 29.03 |
| 4444 | 134.13 | 102.38 | 58.88 | 35.88 | 29.03 |
| 4446 | 133.97 | 102.27 | 58.84 | 35.87 | 29.01 |
| 4448 | 133.79 | 102.13 | 58.78 | 35.83 | 28.98 |
| 4450 | 133.64 | 102.03 | 58.76 | 35.83 | 28.96 |
| 4452 | 133.46 | 101.92 | 58.72 | 35.84 | 28.98 |
| 4454 | 133.32 | 101.82 | 58.71 | 35.87 | 29    |
| 4456 | 133.15 | 101.71 | 58.67 | 35.84 | 28.97 |
| 4458 | 133    | 101.6  | 58.65 | 35.84 | 28.98 |
| 4460 | 132.84 | 101.49 | 58.61 | 35.83 | 28.97 |
| 4462 | 132.65 | 101.36 | 58.56 | 35.82 | 28.97 |
| 4464 | 132.49 | 101.25 | 58.53 | 35.81 | 28.95 |
| 4466 | 132.3  | 101.11 | 58.47 | 35.76 | 28.93 |
| 4468 | 132.15 | 101.01 | 58.45 | 35.76 | 28.92 |
| 4470 | 131.96 | 100.9  | 58.42 | 35.75 | 28.91 |
| 4472 | 131.82 | 100.79 | 58.38 | 35.75 | 28.92 |
| 4474 | 131.66 | 100.68 | 58.35 | 35.74 | 28.91 |
| 4476 | 131.45 | 100.55 | 58.28 | 35.7  | 28.87 |
| 4478 | 131.26 | 100.39 | 58.2  | 35.66 | 28.84 |
| 4480 | 131.12 | 100.29 | 58.18 | 35.65 | 28.83 |
| 4482 | 131    | 100.23 | 58.19 | 35.7  | 28.88 |
| 4484 | 130.82 | 100.12 | 58.16 | 35.7  | 28.86 |
| 4486 | 130.65 | 99.99  | 58.09 | 35.67 | 28.85 |

|      |        |       |       |       |       |
|------|--------|-------|-------|-------|-------|
| 4488 | 130.47 | 99.85 | 58.03 | 35.62 | 28.8  |
| 4490 | 130.34 | 99.77 | 58.01 | 35.62 | 28.8  |
| 4492 | 130.17 | 99.68 | 57.99 | 35.64 | 28.82 |
| 4494 | 130    | 99.54 | 57.93 | 35.6  | 28.79 |
| 4496 | 129.88 | 99.46 | 57.93 | 35.64 | 28.82 |
| 4498 | 129.7  | 99.32 | 57.88 | 35.59 | 28.79 |
| 4500 | 129.51 | 99.2  | 57.85 | 35.59 | 28.78 |
| 4502 | 129.37 | 99.11 | 57.84 | 35.6  | 28.78 |
| 4504 | 129.17 | 98.96 | 57.75 | 35.55 | 28.73 |
| 4506 | 129.04 | 98.88 | 57.74 | 35.56 | 28.76 |
| 4508 | 128.86 | 98.76 | 57.7  | 35.54 | 28.73 |
| 4510 | 128.69 | 98.64 | 57.65 | 35.51 | 28.72 |
| 4512 | 128.54 | 98.53 | 57.6  | 35.49 | 28.71 |
| 4514 | 128.42 | 98.45 | 57.61 | 35.51 | 28.72 |
| 4516 | 128.25 | 98.34 | 57.56 | 35.49 | 28.72 |
| 4518 | 128.12 | 98.25 | 57.55 | 35.51 | 28.73 |
| 4520 | 127.96 | 98.15 | 57.52 | 35.49 | 28.72 |
| 4522 | 127.79 | 98.02 | 57.46 | 35.47 | 28.7  |
| 4524 | 127.59 | 97.88 | 57.41 | 35.45 | 28.67 |
| 4526 | 127.44 | 97.77 | 57.37 | 35.43 | 28.66 |
| 4528 | 127.32 | 97.7  | 57.36 | 35.45 | 28.68 |
| 4530 | 127.18 | 97.6  | 57.33 | 35.46 | 28.7  |
| 4532 | 127.03 | 97.49 | 57.29 | 35.44 | 28.68 |
| 4534 | 126.87 | 97.39 | 57.28 | 35.45 | 28.69 |
| 4536 | 126.7  | 97.27 | 57.21 | 35.42 | 28.66 |
| 4538 | 126.55 | 97.17 | 57.19 | 35.41 | 28.66 |
| 4540 | 126.38 | 97.03 | 57.12 | 35.37 | 28.62 |
| 4542 | 126.25 | 96.95 | 57.12 | 35.39 | 28.66 |
| 4544 | 126.09 | 96.84 | 57.08 | 35.38 | 28.64 |
| 4546 | 125.94 | 96.73 | 57.05 | 35.37 | 28.64 |
| 4548 | 125.79 | 96.65 | 57.03 | 35.37 | 28.65 |
| 4550 | 125.65 | 96.53 | 56.99 | 35.36 | 28.64 |
| 4552 | 125.49 | 96.42 | 56.96 | 35.33 | 28.62 |
| 4554 | 125.38 | 96.34 | 56.94 | 35.35 | 28.63 |
| 4556 | 125.18 | 96.19 | 56.86 | 35.3  | 28.58 |
| 4558 | 124.98 | 96.05 | 56.79 | 35.25 | 28.55 |
| 4560 | 124.88 | 95.99 | 56.8  | 35.28 | 28.58 |
| 4562 | 124.74 | 95.9  | 56.78 | 35.29 | 28.6  |
| 4564 | 124.58 | 95.81 | 56.76 | 35.3  | 28.59 |
| 4566 | 124.43 | 95.69 | 56.72 | 35.3  | 28.6  |
| 4568 | 124.29 | 95.6  | 56.69 | 35.29 | 28.58 |
| 4570 | 124.1  | 95.47 | 56.61 | 35.25 | 28.55 |
| 4572 | 123.94 | 95.39 | 56.59 | 35.24 | 28.56 |
| 4574 | 123.8  | 95.27 | 56.55 | 35.23 | 28.54 |

|      |        |       |       |       |       |
|------|--------|-------|-------|-------|-------|
| 4576 | 123.67 | 95.18 | 56.54 | 35.23 | 28.53 |
| 4578 | 123.51 | 95.07 | 56.5  | 35.21 | 28.54 |
| 4580 | 123.34 | 94.94 | 56.42 | 35.17 | 28.5  |
| 4582 | 123.18 | 94.83 | 56.38 | 35.14 | 28.49 |
| 4584 | 123.06 | 94.76 | 56.38 | 35.18 | 28.52 |
| 4586 | 122.92 | 94.64 | 56.34 | 35.15 | 28.51 |
| 4588 | 122.72 | 94.52 | 56.27 | 35.11 | 28.46 |
| 4590 | 122.59 | 94.4  | 56.24 | 35.1  | 28.47 |
| 4592 | 122.43 | 94.3  | 56.2  | 35.08 | 28.45 |
| 4594 | 122.29 | 94.2  | 56.17 | 35.09 | 28.44 |
| 4596 | 122.14 | 94.1  | 56.14 | 35.09 | 28.45 |
| 4598 | 121.99 | 93.99 | 56.1  | 35.08 | 28.43 |
| 4600 | 121.85 | 93.89 | 56.07 | 35.07 | 28.42 |
| 4602 | 121.71 | 93.8  | 56.03 | 35.06 | 28.42 |
| 4604 | 121.58 | 93.71 | 56    | 35.06 | 28.41 |
| 4606 | 121.41 | 93.6  | 55.97 | 35.04 | 28.4  |
| 4608 | 121.28 | 93.5  | 55.94 | 35.04 | 28.4  |
| 4610 | 121.14 | 93.4  | 55.9  | 35.03 | 28.4  |
| 4612 | 120.99 | 93.31 | 55.87 | 35.02 | 28.39 |
| 4614 | 120.86 | 93.22 | 55.83 | 35.01 | 28.38 |
| 4616 | 120.76 | 93.16 | 55.85 | 35.07 | 28.42 |
| 4618 | 120.6  | 93.06 | 55.8  | 35.03 | 28.39 |
| 4620 | 120.42 | 92.94 | 55.74 | 35    | 28.37 |
| 4622 | 120.27 | 92.8  | 55.69 | 34.96 | 28.35 |
| 4624 | 120.14 | 92.72 | 55.68 | 34.98 | 28.36 |
| 4626 | 120    | 92.61 | 55.63 | 34.96 | 28.34 |
| 4628 | 119.86 | 92.52 | 55.6  | 34.96 | 28.33 |
| 4630 | 119.72 | 92.44 | 55.59 | 34.95 | 28.34 |
| 4632 | 119.59 | 92.34 | 55.56 | 34.96 | 28.35 |
| 4634 | 119.43 | 92.22 | 55.5  | 34.92 | 28.32 |
| 4636 | 119.27 | 92.12 | 55.46 | 34.91 | 28.31 |
| 4638 | 119.15 | 92.01 | 55.43 | 34.91 | 28.32 |
| 4640 | 119    | 91.91 | 55.39 | 34.89 | 28.3  |
| 4642 | 118.88 | 91.83 | 55.38 | 34.9  | 28.32 |
| 4644 | 118.74 | 91.76 | 55.36 | 34.92 | 28.34 |
| 4646 | 118.58 | 91.64 | 55.3  | 34.88 | 28.29 |
| 4648 | 118.45 | 91.56 | 55.28 | 34.89 | 28.3  |
| 4650 | 118.36 | 91.5  | 55.28 | 34.9  | 28.31 |
| 4652 | 118.19 | 91.38 | 55.22 | 34.87 | 28.29 |
| 4654 | 118.04 | 91.26 | 55.17 | 34.85 | 28.27 |
| 4656 | 117.91 | 91.19 | 55.15 | 34.85 | 28.27 |
| 4658 | 117.81 | 91.12 | 55.14 | 34.86 | 28.29 |
| 4660 | 117.62 | 91    | 55.08 | 34.82 | 28.25 |
| 4662 | 117.51 | 90.9  | 55.07 | 34.83 | 28.27 |

|      |        |       |       |       |       |
|------|--------|-------|-------|-------|-------|
| 4664 | 117.37 | 90.8  | 55.03 | 34.82 | 28.27 |
| 4666 | 117.23 | 90.7  | 54.98 | 34.8  | 28.24 |
| 4668 | 117.1  | 90.63 | 54.98 | 34.8  | 28.27 |
| 4670 | 116.96 | 90.53 | 54.94 | 34.79 | 28.26 |
| 4672 | 116.82 | 90.41 | 54.89 | 34.76 | 28.23 |
| 4674 | 116.68 | 90.32 | 54.85 | 34.76 | 28.23 |
| 4676 | 116.56 | 90.24 | 54.85 | 34.76 | 28.23 |
| 4678 | 116.43 | 90.15 | 54.83 | 34.77 | 28.24 |
| 4680 | 116.29 | 90.05 | 54.78 | 34.75 | 28.23 |
| 4682 | 116.11 | 89.92 | 54.71 | 34.7  | 28.18 |
| 4684 | 116.01 | 89.87 | 54.72 | 34.73 | 28.23 |
| 4686 | 115.88 | 89.77 | 54.69 | 34.72 | 28.21 |
| 4688 | 115.76 | 89.69 | 54.67 | 34.73 | 28.22 |
| 4690 | 115.58 | 89.56 | 54.59 | 34.67 | 28.15 |
| 4692 | 115.43 | 89.46 | 54.55 | 34.67 | 28.16 |
| 4694 | 115.33 | 89.4  | 54.55 | 34.69 | 28.19 |
| 4696 | 115.16 | 89.27 | 54.48 | 34.63 | 28.14 |
| 4698 | 115.05 | 89.2  | 54.47 | 34.64 | 28.15 |
| 4700 | 114.94 | 89.15 | 54.47 | 34.68 | 28.18 |
| 4702 | 114.8  | 89.03 | 54.45 | 34.68 | 28.18 |
| 4704 | 114.67 | 88.94 | 54.39 | 34.65 | 28.14 |
| 4706 | 114.57 | 88.87 | 54.39 | 34.67 | 28.17 |
| 4708 | 114.42 | 88.77 | 54.36 | 34.66 | 28.16 |
| 4710 | 114.24 | 88.64 | 54.3  | 34.63 | 28.13 |
| 4712 | 114.12 | 88.56 | 54.26 | 34.61 | 28.12 |
| 4714 | 114.02 | 88.5  | 54.26 | 34.63 | 28.14 |
| 4716 | 113.88 | 88.4  | 54.22 | 34.63 | 28.14 |
| 4718 | 113.72 | 88.29 | 54.17 | 34.59 | 28.12 |
| 4720 | 113.56 | 88.15 | 54.11 | 34.54 | 28.07 |
| 4722 | 113.46 | 88.09 | 54.1  | 34.57 | 28.1  |
| 4724 | 113.32 | 88    | 54.06 | 34.53 | 28.06 |
| 4726 | 113.15 | 87.87 | 54.01 | 34.51 | 28.05 |
| 4728 | 113.03 | 87.79 | 53.96 | 34.5  | 28.04 |
| 4730 | 112.93 | 87.73 | 53.95 | 34.5  | 28.06 |
| 4732 | 112.81 | 87.66 | 53.95 | 34.52 | 28.07 |
| 4734 | 112.68 | 87.55 | 53.89 | 34.48 | 28.04 |
| 4736 | 112.54 | 87.45 | 53.86 | 34.48 | 28.04 |
| 4738 | 112.42 | 87.36 | 53.82 | 34.47 | 28.03 |
| 4740 | 112.31 | 87.29 | 53.82 | 34.49 | 28.05 |
| 4742 | 112.18 | 87.21 | 53.79 | 34.5  | 28.06 |
| 4744 | 112.03 | 87.09 | 53.73 | 34.44 | 28.02 |
| 4746 | 111.94 | 87.03 | 53.72 | 34.46 | 28.03 |
| 4748 | 111.81 | 86.95 | 53.72 | 34.49 | 28.04 |
| 4750 | 111.65 | 86.83 | 53.63 | 34.43 | 27.98 |

|      |        |       |       |       |       |
|------|--------|-------|-------|-------|-------|
| 4752 | 111.56 | 86.78 | 53.63 | 34.45 | 28.03 |
| 4754 | 111.42 | 86.66 | 53.58 | 34.42 | 28    |
| 4756 | 111.27 | 86.58 | 53.55 | 34.44 | 28    |
| 4758 | 111.09 | 86.43 | 53.48 | 34.38 | 27.95 |
| 4760 | 110.98 | 86.35 | 53.46 | 34.37 | 27.94 |
| 4762 | 110.91 | 86.33 | 53.47 | 34.41 | 27.99 |
| 4764 | 110.73 | 86.18 | 53.41 | 34.37 | 27.94 |
| 4766 | 110.61 | 86.09 | 53.36 | 34.36 | 27.93 |
| 4768 | 110.51 | 86.03 | 53.37 | 34.39 | 27.96 |
| 4770 | 110.38 | 85.95 | 53.33 | 34.38 | 27.96 |
| 4772 | 110.25 | 85.89 | 53.31 | 34.37 | 27.96 |
| 4774 | 110.16 | 85.79 | 53.29 | 34.38 | 27.96 |
| 4776 | 110.01 | 85.7  | 53.23 | 34.34 | 27.92 |
| 4778 | 109.88 | 85.61 | 53.2  | 34.34 | 27.93 |
| 4780 | 109.76 | 85.52 | 53.18 | 34.34 | 27.93 |
| 4782 | 109.62 | 85.42 | 53.11 | 34.3  | 27.91 |
| 4784 | 109.51 | 85.36 | 53.12 | 34.32 | 27.91 |
| 4786 | 109.38 | 85.27 | 53.07 | 34.3  | 27.89 |
| 4788 | 109.22 | 85.14 | 53.01 | 34.27 | 27.87 |
| 4790 | 109.1  | 85.07 | 52.99 | 34.26 | 27.86 |
| 4792 | 108.97 | 84.97 | 52.94 | 34.23 | 27.85 |
| 4794 | 108.84 | 84.88 | 52.91 | 34.22 | 27.84 |
| 4796 | 108.72 | 84.8  | 52.88 | 34.2  | 27.84 |
| 4798 | 108.61 | 84.72 | 52.86 | 34.2  | 27.83 |
| 4800 | 108.49 | 84.63 | 52.82 | 34.2  | 27.83 |
| 4802 | 108.38 | 84.56 | 52.81 | 34.2  | 27.85 |
| 4804 | 108.25 | 84.51 | 52.8  | 34.21 | 27.86 |
| 4806 | 108.12 | 84.37 | 52.73 | 34.18 | 27.84 |
| 4808 | 107.99 | 84.29 | 52.69 | 34.16 | 27.81 |
| 4810 | 107.86 | 84.2  | 52.67 | 34.16 | 27.8  |
| 4812 | 107.74 | 84.13 | 52.64 | 34.15 | 27.79 |
| 4814 | 107.63 | 84.04 | 52.61 | 34.16 | 27.8  |
| 4816 | 107.5  | 83.94 | 52.57 | 34.14 | 27.78 |
| 4818 | 107.39 | 83.87 | 52.54 | 34.13 | 27.78 |
| 4820 | 107.26 | 83.77 | 52.5  | 34.11 | 27.76 |
| 4822 | 107.16 | 83.71 | 52.49 | 34.13 | 27.78 |
| 4824 | 107.02 | 83.61 | 52.44 | 34.11 | 27.77 |
| 4826 | 106.89 | 83.51 | 52.39 | 34.07 | 27.75 |
| 4828 | 106.77 | 83.44 | 52.37 | 34.06 | 27.75 |
| 4830 | 106.66 | 83.37 | 52.37 | 34.08 | 27.76 |
| 4832 | 106.54 | 83.28 | 52.32 | 34.07 | 27.75 |
| 4834 | 106.41 | 83.2  | 52.28 | 34.05 | 27.73 |
| 4836 | 106.28 | 83.1  | 52.25 | 34.04 | 27.73 |
| 4838 | 106.16 | 83.02 | 52.22 | 34.03 | 27.72 |

|      |        |       |       |       |       |
|------|--------|-------|-------|-------|-------|
| 4840 | 106.05 | 82.95 | 52.19 | 34.02 | 27.72 |
| 4842 | 105.94 | 82.87 | 52.16 | 34.02 | 27.71 |
| 4844 | 105.81 | 82.77 | 52.12 | 34.01 | 27.71 |
| 4846 | 105.69 | 82.69 | 52.1  | 34.01 | 27.71 |
| 4848 | 105.55 | 82.59 | 52.05 | 33.99 | 27.69 |
| 4850 | 105.46 | 82.53 | 52.03 | 34    | 27.69 |
| 4852 | 105.33 | 82.46 | 52.01 | 34    | 27.69 |
| 4854 | 105.2  | 82.35 | 51.96 | 33.97 | 27.65 |
| 4856 | 105.09 | 82.28 | 51.93 | 33.97 | 27.67 |
| 4858 | 104.98 | 82.2  | 51.91 | 33.95 | 27.67 |
| 4860 | 104.85 | 82.11 | 51.87 | 33.94 | 27.67 |
| 4862 | 104.69 | 81.99 | 51.82 | 33.91 | 27.64 |
| 4864 | 104.61 | 81.93 | 51.81 | 33.92 | 27.65 |
| 4866 | 104.52 | 81.88 | 51.79 | 33.92 | 27.65 |
| 4868 | 104.43 | 81.81 | 51.78 | 33.92 | 27.67 |
| 4870 | 104.28 | 81.72 | 51.74 | 33.92 | 27.67 |
| 4872 | 104.15 | 81.63 | 51.7  | 33.89 | 27.63 |
| 4874 | 104.02 | 81.53 | 51.66 | 33.86 | 27.61 |
| 4876 | 103.9  | 81.47 | 51.63 | 33.87 | 27.61 |
| 4878 | 103.8  | 81.38 | 51.61 | 33.86 | 27.61 |
| 4880 | 103.67 | 81.3  | 51.56 | 33.84 | 27.6  |
| 4882 | 103.57 | 81.21 | 51.54 | 33.83 | 27.6  |
| 4884 | 103.45 | 81.13 | 51.51 | 33.82 | 27.59 |
| 4886 | 103.34 | 81.05 | 51.47 | 33.82 | 27.59 |
| 4888 | 103.23 | 80.99 | 51.45 | 33.82 | 27.59 |
| 4890 | 103.11 | 80.89 | 51.41 | 33.79 | 27.57 |
| 4892 | 103    | 80.82 | 51.4  | 33.8  | 27.58 |
| 4894 | 102.85 | 80.7  | 51.32 | 33.74 | 27.54 |
| 4896 | 102.76 | 80.64 | 51.31 | 33.75 | 27.54 |
| 4898 | 102.67 | 80.58 | 51.3  | 33.77 | 27.56 |
| 4900 | 102.54 | 80.49 | 51.26 | 33.75 | 27.55 |
| 4902 | 102.43 | 80.42 | 51.25 | 33.77 | 27.54 |
| 4904 | 102.37 | 80.38 | 51.24 | 33.79 | 27.57 |
| 4906 | 102.23 | 80.28 | 51.19 | 33.76 | 27.54 |
| 4908 | 102.09 | 80.19 | 51.16 | 33.74 | 27.53 |
| 4910 | 101.96 | 80.07 | 51.12 | 33.71 | 27.52 |
| 4912 | 101.86 | 80    | 51.09 | 33.71 | 27.51 |
| 4914 | 101.77 | 79.96 | 51.08 | 33.71 | 27.51 |
| 4916 | 101.6  | 79.82 | 51.01 | 33.66 | 27.47 |
| 4918 | 101.48 | 79.74 | 50.96 | 33.62 | 27.45 |
| 4920 | 101.41 | 79.71 | 50.98 | 33.67 | 27.5  |
| 4922 | 101.32 | 79.64 | 50.95 | 33.67 | 27.5  |
| 4924 | 101.22 | 79.59 | 50.95 | 33.69 | 27.52 |
| 4926 | 101.12 | 79.51 | 50.93 | 33.69 | 27.52 |



|      |        |       |       |       |       |
|------|--------|-------|-------|-------|-------|
| 4928 | 100.95 | 79.38 | 50.84 | 33.61 | 27.47 |
| 4930 | 100.83 | 79.29 | 50.79 | 33.59 | 27.43 |
| 4932 | 100.73 | 79.24 | 50.79 | 33.61 | 27.46 |
| 4934 | 100.63 | 79.17 | 50.76 | 33.62 | 27.46 |
| 4936 | 100.52 | 79.08 | 50.73 | 33.6  | 27.44 |
| 4938 | 100.43 | 79.03 | 50.71 | 33.62 | 27.45 |
| 4940 | 100.32 | 78.96 | 50.68 | 33.61 | 27.44 |
| 4942 | 100.21 | 78.87 | 50.65 | 33.59 | 27.44 |
| 4944 | 100.12 | 78.81 | 50.63 | 33.59 | 27.44 |
| 4946 | 100.05 | 78.76 | 50.64 | 33.61 | 27.46 |
| 4948 | 99.89  | 78.64 | 50.58 | 33.58 | 27.44 |
| 4950 | 99.77  | 78.56 | 50.53 | 33.56 | 27.42 |
| 4952 | 99.68  | 78.5  | 50.52 | 33.57 | 27.43 |
| 4954 | 99.57  | 78.41 | 50.48 | 33.54 | 27.41 |
| 4956 | 99.45  | 78.31 | 50.41 | 33.49 | 27.36 |
| 4958 | 99.34  | 78.25 | 50.41 | 33.52 | 27.38 |
| 4960 | 99.23  | 78.18 | 50.38 | 33.51 | 27.39 |
| 4962 | 99.12  | 78.09 | 50.34 | 33.49 | 27.37 |
| 4964 | 99.02  | 78.02 | 50.32 | 33.48 | 27.37 |
| 4966 | 98.91  | 77.93 | 50.28 | 33.47 | 27.36 |
| 4968 | 98.81  | 77.88 | 50.26 | 33.48 | 27.37 |
| 4970 | 98.71  | 77.8  | 50.24 | 33.47 | 27.37 |
| 4972 | 98.61  | 77.73 | 50.21 | 33.46 | 27.36 |
| 4974 | 98.5   | 77.67 | 50.2  | 33.46 | 27.37 |
| 4976 | 98.39  | 77.59 | 50.16 | 33.45 | 27.36 |
| 4978 | 98.29  | 77.51 | 50.12 | 33.43 | 27.35 |
| 4980 | 98.17  | 77.44 | 50.09 | 33.43 | 27.34 |
| 4982 | 98.1   | 77.38 | 50.08 | 33.44 | 27.34 |
| 4984 | 97.94  | 77.25 | 50    | 33.37 | 27.29 |
| 4986 | 97.87  | 77.22 | 50    | 33.41 | 27.33 |
| 4988 | 97.7   | 77.1  | 49.95 | 33.37 | 27.28 |
| 4990 | 97.63  | 77.05 | 49.92 | 33.38 | 27.3  |
| 4992 | 97.54  | 77    | 49.91 | 33.37 | 27.3  |
| 4994 | 97.44  | 76.92 | 49.89 | 33.36 | 27.3  |
| 4996 | 97.32  | 76.84 | 49.85 | 33.35 | 27.3  |
| 4998 | 97.22  | 76.77 | 49.82 | 33.34 | 27.29 |
| 5000 | 97.12  | 76.7  | 49.79 | 33.33 | 27.28 |
| 5002 | 97.07  | 76.68 | 49.82 | 33.37 | 27.31 |
| 5004 | 96.94  | 76.6  | 49.78 | 33.34 | 27.3  |
| 5006 | 96.82  | 76.5  | 49.72 | 33.31 | 27.28 |
| 5008 | 96.72  | 76.43 | 49.69 | 33.31 | 27.27 |
| 5010 | 96.62  | 76.36 | 49.66 | 33.3  | 27.28 |
| 5012 | 96.53  | 76.3  | 49.65 | 33.3  | 27.28 |
| 5014 | 96.4   | 76.22 | 49.62 | 33.29 | 27.27 |

|      |       |       |       |       |       |
|------|-------|-------|-------|-------|-------|
| 5016 | 96.32 | 76.16 | 49.6  | 33.3  | 27.27 |
| 5018 | 96.2  | 76.07 | 49.55 | 33.28 | 27.25 |
| 5020 | 96.09 | 76.02 | 49.54 | 33.28 | 27.26 |
| 5022 | 96.03 | 75.97 | 49.55 | 33.31 | 27.3  |
| 5024 | 95.89 | 75.87 | 49.48 | 33.27 | 27.25 |
| 5026 | 95.8  | 75.81 | 49.46 | 33.26 | 27.24 |
| 5028 | 95.67 | 75.7  | 49.41 | 33.24 | 27.22 |
| 5030 | 95.58 | 75.63 | 49.38 | 33.23 | 27.23 |
| 5032 | 95.5  | 75.59 | 49.37 | 33.24 | 27.23 |
| 5034 | 95.43 | 75.55 | 49.38 | 33.26 | 27.26 |
| 5036 | 95.31 | 75.46 | 49.33 | 33.23 | 27.25 |
| 5038 | 95.18 | 75.35 | 49.26 | 33.18 | 27.21 |
| 5040 | 95.07 | 75.27 | 49.23 | 33.16 | 27.18 |
| 5042 | 94.98 | 75.2  | 49.2  | 33.15 | 27.18 |
| 5044 | 94.86 | 75.12 | 49.17 | 33.14 | 27.17 |
| 5046 | 94.75 | 75.04 | 49.13 | 33.12 | 27.17 |
| 5048 | 94.64 | 74.96 | 49.08 | 33.1  | 27.14 |
| 5050 | 94.55 | 74.9  | 49.07 | 33.09 | 27.12 |
| 5052 | 94.44 | 74.83 | 49.03 | 33.09 | 27.11 |
| 5054 | 94.37 | 74.78 | 49.03 | 33.12 | 27.15 |
| 5056 | 94.27 | 74.71 | 49.01 | 33.1  | 27.15 |
| 5058 | 94.16 | 74.63 | 48.96 | 33.09 | 27.12 |
| 5060 | 94.05 | 74.56 | 48.93 | 33.07 | 27.11 |
| 5062 | 93.96 | 74.5  | 48.92 | 33.09 | 27.13 |
| 5064 | 93.86 | 74.44 | 48.88 | 33.07 | 27.12 |
| 5066 | 93.78 | 74.38 | 48.86 | 33.06 | 27.12 |
| 5068 | 93.67 | 74.29 | 48.82 | 33.04 | 27.1  |
| 5070 | 93.53 | 74.19 | 48.76 | 33.01 | 27.08 |
| 5072 | 93.45 | 74.14 | 48.76 | 33.02 | 27.09 |
| 5074 | 93.37 | 74.09 | 48.75 | 33.03 | 27.09 |
| 5076 | 93.28 | 74.02 | 48.72 | 33.03 | 27.1  |
| 5078 | 93.19 | 73.95 | 48.7  | 33.02 | 27.09 |
| 5080 | 93.07 | 73.87 | 48.65 | 32.99 | 27.07 |
| 5082 | 92.99 | 73.81 | 48.64 | 32.99 | 27.07 |
| 5084 | 92.88 | 73.76 | 48.62 | 32.98 | 27.07 |
| 5086 | 92.78 | 73.67 | 48.58 | 32.96 | 27.06 |
| 5088 | 92.68 | 73.58 | 48.52 | 32.93 | 27.04 |
| 5090 | 92.59 | 73.54 | 48.52 | 32.95 | 27.05 |
| 5092 | 92.48 | 73.47 | 48.49 | 32.95 | 27.05 |
| 5094 | 92.39 | 73.4  | 48.47 | 32.93 | 27.05 |
| 5096 | 92.29 | 73.32 | 48.43 | 32.92 | 27.04 |
| 5098 | 92.16 | 73.23 | 48.39 | 32.9  | 27.01 |
| 5100 | 92.08 | 73.18 | 48.38 | 32.91 | 27.03 |
| 5102 | 92    | 73.12 | 48.35 | 32.91 | 27.02 |

|      |       |       |       |       |       |
|------|-------|-------|-------|-------|-------|
| 5104 | 91.9  | 73.06 | 48.32 | 32.91 | 27.02 |
| 5106 | 91.82 | 72.99 | 48.3  | 32.9  | 27    |
| 5108 | 91.72 | 72.94 | 48.28 | 32.9  | 27.01 |
| 5110 | 91.64 | 72.87 | 48.26 | 32.9  | 27.03 |
| 5112 | 91.53 | 72.78 | 48.22 | 32.87 | 27    |
| 5114 | 91.42 | 72.7  | 48.17 | 32.84 | 26.98 |
| 5116 | 91.3  | 72.64 | 48.15 | 32.83 | 26.97 |
| 5118 | 91.23 | 72.59 | 48.13 | 32.84 | 26.98 |
| 5120 | 91.15 | 72.52 | 48.11 | 32.83 | 26.98 |
| 5122 | 91.06 | 72.46 | 48.08 | 32.82 | 26.97 |
| 5124 | 90.91 | 72.35 | 48.03 | 32.79 | 26.95 |
| 5126 | 90.82 | 72.3  | 47.99 | 32.78 | 26.92 |
| 5128 | 90.77 | 72.26 | 48    | 32.81 | 26.96 |
| 5130 | 90.66 | 72.17 | 47.95 | 32.77 | 26.92 |
| 5132 | 90.57 | 72.14 | 47.95 | 32.8  | 26.94 |
| 5134 | 90.45 | 72.04 | 47.88 | 32.75 | 26.92 |
| 5136 | 90.35 | 71.98 | 47.86 | 32.75 | 26.91 |
| 5138 | 90.29 | 71.94 | 47.86 | 32.76 | 26.91 |
| 5140 | 90.15 | 71.85 | 47.82 | 32.74 | 26.9  |
| 5142 | 90.06 | 71.77 | 47.79 | 32.73 | 26.9  |
| 5144 | 89.98 | 71.72 | 47.77 | 32.7  | 26.88 |
| 5146 | 89.91 | 71.66 | 47.75 | 32.71 | 26.89 |
| 5148 | 89.8  | 71.61 | 47.73 | 32.72 | 26.89 |
| 5150 | 89.71 | 71.53 | 47.7  | 32.7  | 26.89 |
| 5152 | 89.61 | 71.45 | 47.65 | 32.66 | 26.86 |
| 5154 | 89.5  | 71.35 | 47.6  | 32.64 | 26.84 |
| 5156 | 89.41 | 71.31 | 47.6  | 32.65 | 26.84 |
| 5158 | 89.33 | 71.25 | 47.58 | 32.66 | 26.84 |
| 5160 | 89.21 | 71.16 | 47.52 | 32.63 | 26.81 |
| 5162 | 89.14 | 71.1  | 47.5  | 32.62 | 26.83 |
| 5164 | 89.08 | 71.07 | 47.51 | 32.65 | 26.85 |
| 5166 | 88.99 | 71.02 | 47.5  | 32.66 | 26.86 |
| 5168 | 88.91 | 70.96 | 47.47 | 32.66 | 26.86 |
| 5170 | 88.82 | 70.89 | 47.45 | 32.64 | 26.86 |
| 5172 | 88.68 | 70.79 | 47.38 | 32.59 | 26.8  |
| 5174 | 88.57 | 70.71 | 47.33 | 32.57 | 26.8  |
| 5176 | 88.51 | 70.68 | 47.33 | 32.58 | 26.81 |
| 5178 | 88.39 | 70.59 | 47.3  | 32.55 | 26.79 |
| 5180 | 88.3  | 70.53 | 47.27 | 32.56 | 26.79 |
| 5182 | 88.19 | 70.45 | 47.23 | 32.52 | 26.76 |
| 5184 | 88.1  | 70.39 | 47.19 | 32.51 | 26.75 |
| 5186 | 88.06 | 70.38 | 47.23 | 32.55 | 26.8  |
| 5188 | 87.97 | 70.33 | 47.21 | 32.56 | 26.81 |
| 5190 | 87.9  | 70.26 | 47.19 | 32.56 | 26.79 |

|      |       |       |       |       |       |
|------|-------|-------|-------|-------|-------|
| 5192 | 87.81 | 70.21 | 47.16 | 32.55 | 26.8  |
| 5194 | 87.72 | 70.14 | 47.14 | 32.55 | 26.79 |
| 5196 | 87.6  | 70.05 | 47.09 | 32.52 | 26.76 |
| 5198 | 87.49 | 69.97 | 47.04 | 32.49 | 26.73 |
| 5200 | 87.43 | 69.92 | 47.03 | 32.49 | 26.77 |
| 5202 | 87.35 | 69.87 | 47.02 | 32.51 | 26.76 |
| 5204 | 87.29 | 69.84 | 47.02 | 32.52 | 26.77 |
| 5206 | 87.15 | 69.73 | 46.94 | 32.47 | 26.73 |
| 5208 | 87.04 | 69.64 | 46.89 | 32.44 | 26.7  |
| 5210 | 86.98 | 69.61 | 46.9  | 32.46 | 26.72 |
| 5212 | 86.89 | 69.55 | 46.87 | 32.45 | 26.72 |
| 5214 | 86.8  | 69.49 | 46.86 | 32.46 | 26.73 |
| 5216 | 86.68 | 69.4  | 46.8  | 32.41 | 26.69 |
| 5218 | 86.59 | 69.33 | 46.78 | 32.41 | 26.69 |
| 5220 | 86.52 | 69.29 | 46.76 | 32.41 | 26.69 |
| 5222 | 86.47 | 69.26 | 46.77 | 32.44 | 26.73 |
| 5224 | 86.33 | 69.15 | 46.7  | 32.38 | 26.67 |
| 5226 | 86.22 | 69.06 | 46.64 | 32.34 | 26.64 |
| 5228 | 86.14 | 69.04 | 46.65 | 32.38 | 26.67 |
| 5230 | 86.05 | 68.96 | 46.61 | 32.36 | 26.65 |
| 5232 | 85.97 | 68.9  | 46.59 | 32.35 | 26.65 |
| 5234 | 85.89 | 68.84 | 46.56 | 32.34 | 26.64 |
| 5236 | 85.8  | 68.77 | 46.54 | 32.33 | 26.64 |
| 5238 | 85.71 | 68.72 | 46.51 | 32.32 | 26.63 |
| 5240 | 85.62 | 68.66 | 46.48 | 32.3  | 26.62 |
| 5242 | 85.54 | 68.6  | 46.45 | 32.28 | 26.62 |
| 5244 | 85.46 | 68.54 | 46.42 | 32.28 | 26.62 |
| 5246 | 85.37 | 68.47 | 46.4  | 32.27 | 26.61 |
| 5248 | 85.27 | 68.4  | 46.36 | 32.24 | 26.59 |
| 5250 | 85.19 | 68.35 | 46.34 | 32.25 | 26.59 |
| 5252 | 85.12 | 68.3  | 46.32 | 32.24 | 26.6  |
| 5254 | 85.02 | 68.24 | 46.3  | 32.24 | 26.6  |
| 5256 | 84.95 | 68.18 | 46.29 | 32.25 | 26.6  |
| 5258 | 84.86 | 68.13 | 46.26 | 32.25 | 26.59 |
| 5260 | 84.78 | 68.07 | 46.23 | 32.24 | 26.58 |
| 5262 | 84.73 | 68.03 | 46.22 | 32.26 | 26.59 |
| 5264 | 84.59 | 67.93 | 46.15 | 32.2  | 26.56 |
| 5266 | 84.52 | 67.89 | 46.14 | 32.21 | 26.55 |
| 5268 | 84.42 | 67.83 | 46.13 | 32.2  | 26.55 |
| 5270 | 84.35 | 67.76 | 46.1  | 32.2  | 26.55 |
| 5272 | 84.27 | 67.7  | 46.08 | 32.19 | 26.54 |
| 5274 | 84.18 | 67.65 | 46.05 | 32.18 | 26.54 |
| 5276 | 84.09 | 67.58 | 46.03 | 32.17 | 26.54 |
| 5278 | 84    | 67.52 | 45.99 | 32.16 | 26.53 |

|      |       |       |       |       |       |
|------|-------|-------|-------|-------|-------|
| 5280 | 83.93 | 67.46 | 45.97 | 32.14 | 26.52 |
| 5282 | 83.81 | 67.39 | 45.93 | 32.11 | 26.5  |
| 5284 | 83.75 | 67.33 | 45.91 | 32.11 | 26.5  |
| 5286 | 83.67 | 67.28 | 45.89 | 32.11 | 26.5  |
| 5288 | 83.56 | 67.19 | 45.83 | 32.07 | 26.48 |
| 5290 | 83.48 | 67.13 | 45.8  | 32.08 | 26.47 |
| 5292 | 83.37 | 67.04 | 45.76 | 32.04 | 26.44 |
| 5294 | 83.34 | 67.04 | 45.78 | 32.07 | 26.48 |
| 5296 | 83.24 | 66.96 | 45.73 | 32.05 | 26.46 |
| 5298 | 83.16 | 66.89 | 45.69 | 32.02 | 26.43 |
| 5300 | 83.06 | 66.82 | 45.66 | 32    | 26.41 |
| 5302 | 82.97 | 66.76 | 45.62 | 31.98 | 26.4  |
| 5304 | 82.87 | 66.69 | 45.59 | 31.97 | 26.39 |
| 5306 | 82.79 | 66.64 | 45.58 | 31.97 | 26.39 |
| 5308 | 82.71 | 66.6  | 45.55 | 31.97 | 26.39 |
| 5310 | 82.63 | 66.53 | 45.52 | 31.95 | 26.38 |
| 5312 | 82.55 | 66.47 | 45.5  | 31.95 | 26.38 |
| 5314 | 82.49 | 66.44 | 45.5  | 31.96 | 26.39 |
| 5316 | 82.39 | 66.37 | 45.46 | 31.93 | 26.37 |
| 5318 | 82.36 | 66.34 | 45.47 | 31.96 | 26.4  |
| 5320 | 82.25 | 66.25 | 45.41 | 31.92 | 26.38 |
| 5322 | 82.18 | 66.2  | 45.39 | 31.92 | 26.36 |
| 5324 | 82.07 | 66.12 | 45.36 | 31.9  | 26.34 |
| 5326 | 81.96 | 66.05 | 45.3  | 31.86 | 26.31 |
| 5328 | 81.91 | 66.01 | 45.3  | 31.88 | 26.33 |
| 5330 | 81.84 | 65.96 | 45.27 | 31.87 | 26.32 |
| 5332 | 81.74 | 65.9  | 45.25 | 31.86 | 26.32 |
| 5334 | 81.68 | 65.85 | 45.23 | 31.87 | 26.33 |
| 5336 | 81.6  | 65.79 | 45.19 | 31.84 | 26.3  |
| 5338 | 81.54 | 65.75 | 45.2  | 31.86 | 26.31 |
| 5340 | 81.45 | 65.68 | 45.14 | 31.82 | 26.29 |
| 5342 | 81.35 | 65.61 | 45.11 | 31.8  | 26.26 |
| 5344 | 81.29 | 65.57 | 45.11 | 31.82 | 26.29 |
| 5346 | 81.21 | 65.51 | 45.09 | 31.81 | 26.27 |
| 5348 | 81.14 | 65.47 | 45.07 | 31.82 | 26.29 |
| 5350 | 81.06 | 65.41 | 45.05 | 31.82 | 26.29 |
| 5352 | 81    | 65.36 | 45.02 | 31.81 | 26.29 |
| 5354 | 80.91 | 65.29 | 44.99 | 31.8  | 26.27 |
| 5356 | 80.84 | 65.25 | 44.98 | 31.81 | 26.28 |
| 5358 | 80.76 | 65.2  | 44.98 | 31.82 | 26.28 |
| 5360 | 80.66 | 65.12 | 44.92 | 31.78 | 26.26 |
| 5362 | 80.55 | 65.03 | 44.85 | 31.73 | 26.21 |
| 5364 | 80.47 | 64.99 | 44.84 | 31.73 | 26.23 |
| 5366 | 80.42 | 64.95 | 44.84 | 31.74 | 26.24 |

|      |       |       |       |       |       |
|------|-------|-------|-------|-------|-------|
| 5368 | 80.32 | 64.87 | 44.79 | 31.7  | 26.21 |
| 5370 | 80.23 | 64.81 | 44.76 | 31.69 | 26.19 |
| 5372 | 80.15 | 64.75 | 44.74 | 31.69 | 26.19 |
| 5374 | 80.06 | 64.69 | 44.7  | 31.64 | 26.17 |
| 5376 | 79.97 | 64.62 | 44.66 | 31.63 | 26.15 |
| 5378 | 79.9  | 64.57 | 44.63 | 31.63 | 26.14 |
| 5380 | 79.83 | 64.53 | 44.62 | 31.64 | 26.14 |
| 5382 | 79.76 | 64.49 | 44.61 | 31.65 | 26.15 |
| 5384 | 79.68 | 64.42 | 44.58 | 31.63 | 26.14 |
| 5386 | 79.64 | 64.41 | 44.59 | 31.66 | 26.18 |
| 5388 | 79.56 | 64.35 | 44.56 | 31.64 | 26.17 |
| 5390 | 79.46 | 64.28 | 44.53 | 31.64 | 26.15 |
| 5392 | 79.38 | 64.21 | 44.49 | 31.6  | 26.13 |
| 5394 | 79.32 | 64.17 | 44.48 | 31.61 | 26.15 |
| 5396 | 79.25 | 64.13 | 44.46 | 31.6  | 26.14 |
| 5398 | 79.17 | 64.08 | 44.44 | 31.58 | 26.14 |
| 5400 | 79.11 | 64.03 | 44.42 | 31.58 | 26.15 |
| 5402 | 79.04 | 63.98 | 44.39 | 31.58 | 26.13 |
| 5404 | 78.98 | 63.95 | 44.39 | 31.6  | 26.15 |
| 5406 | 78.89 | 63.87 | 44.36 | 31.59 | 26.15 |
| 5408 | 78.79 | 63.78 | 44.3  | 31.53 | 26.1  |
| 5410 | 78.73 | 63.76 | 44.3  | 31.56 | 26.12 |
| 5412 | 78.67 | 63.75 | 44.31 | 31.58 | 26.13 |
| 5414 | 78.55 | 63.63 | 44.22 | 31.52 | 26.06 |
| 5416 | 78.51 | 63.61 | 44.23 | 31.55 | 26.11 |
| 5418 | 78.46 | 63.58 | 44.24 | 31.56 | 26.12 |
| 5420 | 78.36 | 63.5  | 44.19 | 31.53 | 26.11 |
| 5422 | 78.31 | 63.47 | 44.19 | 31.55 | 26.11 |
| 5424 | 78.24 | 63.42 | 44.17 | 31.55 | 26.11 |
| 5426 | 78.14 | 63.35 | 44.13 | 31.52 | 26.09 |
| 5428 | 78.07 | 63.3  | 44.1  | 31.51 | 26.08 |
| 5430 | 77.95 | 63.2  | 44.04 | 31.45 | 26.04 |
| 5432 | 77.88 | 63.15 | 44.02 | 31.45 | 26.04 |
| 5434 | 77.83 | 63.1  | 43.99 | 31.44 | 26.03 |
| 5436 | 77.74 | 63.06 | 43.99 | 31.45 | 26.03 |
| 5438 | 77.69 | 63.02 | 43.99 | 31.44 | 26.04 |
| 5440 | 77.61 | 62.97 | 43.95 | 31.44 | 26.04 |
| 5442 | 77.55 | 62.93 | 43.94 | 31.44 | 26.05 |
| 5444 | 77.49 | 62.89 | 43.93 | 31.45 | 26.06 |
| 5446 | 77.43 | 62.85 | 43.92 | 31.46 | 26.05 |
| 5448 | 77.37 | 62.8  | 43.9  | 31.46 | 26.05 |
| 5450 | 77.29 | 62.74 | 43.87 | 31.44 | 26.04 |
| 5452 | 77.18 | 62.66 | 43.82 | 31.42 | 26.01 |
| 5454 | 77.13 | 62.64 | 43.82 | 31.42 | 26.03 |

|      |       |       |       |       |       |
|------|-------|-------|-------|-------|-------|
| 5456 | 77.05 | 62.59 | 43.79 | 31.42 | 26.03 |
| 5458 | 77    | 62.55 | 43.78 | 31.43 | 26.02 |
| 5460 | 76.92 | 62.5  | 43.75 | 31.41 | 26.02 |
| 5462 | 76.81 | 62.41 | 43.7  | 31.37 | 26    |
| 5464 | 76.74 | 62.36 | 43.67 | 31.37 | 26.01 |
| 5466 | 76.71 | 62.34 | 43.68 | 31.37 | 26.01 |
| 5468 | 76.59 | 62.27 | 43.63 | 31.33 | 25.98 |
| 5470 | 76.53 | 62.21 | 43.6  | 31.34 | 25.98 |
| 5472 | 76.49 | 62.19 | 43.61 | 31.35 | 26    |
| 5474 | 76.42 | 62.14 | 43.57 | 31.33 | 25.98 |
| 5476 | 76.33 | 62.07 | 43.54 | 31.31 | 25.96 |
| 5478 | 76.28 | 62.04 | 43.55 | 31.33 | 25.98 |
| 5480 | 76.22 | 62    | 43.53 | 31.34 | 25.98 |
| 5482 | 76.15 | 61.96 | 43.51 | 31.33 | 25.98 |
| 5484 | 76.04 | 61.88 | 43.46 | 31.29 | 25.95 |
| 5486 | 76    | 61.84 | 43.46 | 31.32 | 25.97 |
| 5488 | 75.89 | 61.76 | 43.39 | 31.27 | 25.93 |
| 5490 | 75.83 | 61.72 | 43.38 | 31.27 | 25.93 |
| 5492 | 75.76 | 61.67 | 43.38 | 31.28 | 25.94 |
| 5494 | 75.71 | 61.64 | 43.37 | 31.29 | 25.95 |
| 5496 | 75.62 | 61.58 | 43.32 | 31.25 | 25.91 |
| 5498 | 75.54 | 61.51 | 43.29 | 31.24 | 25.9  |
| 5500 | 75.43 | 61.44 | 43.26 | 31.21 | 25.88 |
| 5502 | 75.37 | 61.39 | 43.23 | 31.2  | 25.87 |
| 5504 | 75.3  | 61.34 | 43.2  | 31.2  | 25.87 |
| 5506 | 75.23 | 61.3  | 43.18 | 31.19 | 25.87 |
| 5508 | 75.14 | 61.24 | 43.16 | 31.18 | 25.86 |
| 5510 | 75.08 | 61.19 | 43.14 | 31.18 | 25.86 |
| 5512 | 75.01 | 61.14 | 43.11 | 31.16 | 25.86 |
| 5514 | 74.95 | 61.1  | 43.09 | 31.16 | 25.85 |
| 5516 | 74.89 | 61.05 | 43.09 | 31.17 | 25.86 |
| 5518 | 74.82 | 61.01 | 43.07 | 31.17 | 25.86 |
| 5520 | 74.74 | 60.94 | 43.02 | 31.14 | 25.82 |
| 5522 | 74.69 | 60.91 | 43.02 | 31.15 | 25.85 |
| 5524 | 74.65 | 60.89 | 43.03 | 31.17 | 25.86 |
| 5526 | 74.6  | 60.87 | 43.03 | 31.19 | 25.89 |
| 5528 | 74.48 | 60.76 | 42.95 | 31.12 | 25.82 |
| 5530 | 74.4  | 60.71 | 42.92 | 31.09 | 25.8  |
| 5532 | 74.34 | 60.67 | 42.9  | 31.1  | 25.81 |
| 5534 | 74.29 | 60.63 | 42.88 | 31.1  | 25.81 |
| 5536 | 74.22 | 60.58 | 42.86 | 31.09 | 25.82 |
| 5538 | 74.18 | 60.57 | 42.87 | 31.12 | 25.84 |
| 5540 | 74.13 | 60.54 | 42.87 | 31.13 | 25.85 |
| 5542 | 74    | 60.43 | 42.8  | 31.08 | 25.8  |

|      |       |       |       |       |       |
|------|-------|-------|-------|-------|-------|
| 5544 | 73.93 | 60.38 | 42.76 | 31.05 | 25.77 |
| 5546 | 73.88 | 60.34 | 42.75 | 31.05 | 25.79 |
| 5548 | 73.78 | 60.28 | 42.72 | 31.03 | 25.78 |
| 5550 | 73.75 | 60.26 | 42.73 | 31.05 | 25.78 |
| 5552 | 73.67 | 60.2  | 42.68 | 31.02 | 25.77 |
| 5554 | 73.59 | 60.14 | 42.65 | 31    | 25.75 |
| 5556 | 73.52 | 60.1  | 42.64 | 31.01 | 25.76 |
| 5558 | 73.47 | 60.08 | 42.63 | 31    | 25.76 |
| 5560 | 73.42 | 60.04 | 42.64 | 31.04 | 25.79 |
| 5562 | 73.32 | 59.97 | 42.59 | 31    | 25.75 |
| 5564 | 73.26 | 59.93 | 42.57 | 31.01 | 25.76 |
| 5566 | 73.24 | 59.93 | 42.58 | 31.04 | 25.79 |
| 5568 | 73.14 | 59.84 | 42.53 | 30.99 | 25.76 |
| 5570 | 73.09 | 59.81 | 42.52 | 30.99 | 25.76 |
| 5572 | 72.98 | 59.74 | 42.47 | 30.97 | 25.73 |
| 5574 | 72.91 | 59.68 | 42.44 | 30.96 | 25.71 |
| 5576 | 72.87 | 59.64 | 42.44 | 30.97 | 25.73 |
| 5578 | 72.79 | 59.58 | 42.41 | 30.94 | 25.7  |
| 5580 | 72.71 | 59.55 | 42.38 | 30.94 | 25.7  |
| 5582 | 72.67 | 59.5  | 42.38 | 30.94 | 25.7  |
| 5584 | 72.59 | 59.44 | 42.34 | 30.93 | 25.69 |
| 5586 | 72.51 | 59.38 | 42.3  | 30.91 | 25.68 |
| 5588 | 72.44 | 59.33 | 42.27 | 30.89 | 25.67 |
| 5590 | 72.38 | 59.28 | 42.26 | 30.9  | 25.67 |
| 5592 | 72.33 | 59.26 | 42.25 | 30.9  | 25.67 |
| 5594 | 72.26 | 59.2  | 42.21 | 30.88 | 25.65 |
| 5596 | 72.19 | 59.16 | 42.21 | 30.88 | 25.66 |
| 5598 | 72.13 | 59.11 | 42.18 | 30.87 | 25.65 |
| 5600 | 72.07 | 59.06 | 42.16 | 30.87 | 25.64 |
| 5602 | 71.97 | 58.97 | 42.1  | 30.81 | 25.61 |
| 5604 | 71.91 | 58.95 | 42.1  | 30.81 | 25.62 |
| 5606 | 71.86 | 58.93 | 42.09 | 30.84 | 25.64 |
| 5608 | 71.79 | 58.88 | 42.08 | 30.84 | 25.63 |
| 5610 | 71.73 | 58.83 | 42.05 | 30.83 | 25.64 |
| 5612 | 71.71 | 58.81 | 42.05 | 30.84 | 25.64 |
| 5614 | 71.6  | 58.74 | 42.01 | 30.81 | 25.62 |
| 5616 | 71.54 | 58.69 | 41.99 | 30.81 | 25.61 |
| 5618 | 71.51 | 58.68 | 42    | 30.83 | 25.64 |
| 5620 | 71.41 | 58.61 | 41.95 | 30.8  | 25.61 |
| 5622 | 71.34 | 58.55 | 41.93 | 30.8  | 25.6  |
| 5624 | 71.28 | 58.51 | 41.91 | 30.79 | 25.6  |
| 5626 | 71.22 | 58.47 | 41.89 | 30.78 | 25.59 |
| 5628 | 71.15 | 58.43 | 41.88 | 30.78 | 25.59 |
| 5630 | 71.08 | 58.37 | 41.85 | 30.75 | 25.57 |



|      |       |       |       |       |       |
|------|-------|-------|-------|-------|-------|
| 5632 | 71.02 | 58.33 | 41.83 | 30.76 | 25.58 |
| 5634 | 70.95 | 58.27 | 41.79 | 30.73 | 25.56 |
| 5636 | 70.9  | 58.25 | 41.78 | 30.74 | 25.57 |
| 5638 | 70.83 | 58.2  | 41.77 | 30.74 | 25.57 |
| 5640 | 70.76 | 58.16 | 41.75 | 30.73 | 25.57 |
| 5642 | 70.71 | 58.12 | 41.73 | 30.73 | 25.56 |
| 5644 | 70.64 | 58.07 | 41.7  | 30.72 | 25.56 |
| 5646 | 70.58 | 58.02 | 41.68 | 30.71 | 25.55 |
| 5648 | 70.53 | 57.99 | 41.67 | 30.71 | 25.57 |
| 5650 | 70.46 | 57.93 | 41.64 | 30.7  | 25.55 |
| 5652 | 70.38 | 57.87 | 41.6  | 30.66 | 25.53 |
| 5654 | 70.33 | 57.83 | 41.6  | 30.67 | 25.54 |
| 5656 | 70.28 | 57.82 | 41.59 | 30.7  | 25.56 |
| 5658 | 70.21 | 57.77 | 41.57 | 30.68 | 25.54 |
| 5660 | 70.15 | 57.72 | 41.54 | 30.67 | 25.53 |
| 5662 | 70.13 | 57.71 | 41.55 | 30.69 | 25.56 |
| 5664 | 70.06 | 57.67 | 41.54 | 30.68 | 25.56 |
| 5666 | 69.99 | 57.63 | 41.51 | 30.67 | 25.54 |
| 5668 | 69.9  | 57.56 | 41.46 | 30.63 | 25.52 |
| 5670 | 69.82 | 57.49 | 41.42 | 30.6  | 25.5  |
| 5672 | 69.76 | 57.45 | 41.41 | 30.6  | 25.49 |
| 5674 | 69.71 | 57.4  | 41.38 | 30.6  | 25.49 |
| 5676 | 69.62 | 57.35 | 41.36 | 30.58 | 25.47 |
| 5678 | 69.58 | 57.32 | 41.35 | 30.59 | 25.47 |
| 5680 | 69.51 | 57.27 | 41.33 | 30.58 | 25.48 |
| 5682 | 69.43 | 57.21 | 41.28 | 30.55 | 25.45 |
| 5684 | 69.39 | 57.19 | 41.28 | 30.56 | 25.46 |
| 5686 | 69.32 | 57.14 | 41.26 | 30.56 | 25.46 |
| 5688 | 69.27 | 57.1  | 41.24 | 30.55 | 25.46 |
| 5690 | 69.19 | 57.05 | 41.2  | 30.52 | 25.43 |
| 5692 | 69.18 | 57.04 | 41.23 | 30.56 | 25.47 |
| 5694 | 69.09 | 56.98 | 41.19 | 30.55 | 25.46 |
| 5696 | 69.04 | 56.96 | 41.19 | 30.56 | 25.47 |
| 5698 | 68.96 | 56.89 | 41.14 | 30.53 | 25.44 |
| 5700 | 68.9  | 56.85 | 41.12 | 30.5  | 25.42 |
| 5702 | 68.8  | 56.77 | 41.08 | 30.48 | 25.4  |
| 5704 | 68.76 | 56.74 | 41.06 | 30.48 | 25.39 |
| 5706 | 68.72 | 56.72 | 41.06 | 30.49 | 25.42 |
| 5708 | 68.64 | 56.66 | 41.02 | 30.47 | 25.41 |
| 5710 | 68.6  | 56.63 | 41.02 | 30.47 | 25.41 |
| 5712 | 68.54 | 56.59 | 41    | 30.47 | 25.4  |
| 5714 | 68.46 | 56.53 | 40.96 | 30.44 | 25.38 |
| 5716 | 68.42 | 56.51 | 40.96 | 30.45 | 25.39 |
| 5718 | 68.36 | 56.46 | 40.94 | 30.45 | 25.39 |

|      |       |       |       |       |       |
|------|-------|-------|-------|-------|-------|
| 5720 | 68.29 | 56.4  | 40.9  | 30.43 | 25.39 |
| 5722 | 68.2  | 56.33 | 40.86 | 30.39 | 25.34 |
| 5724 | 68.12 | 56.29 | 40.83 | 30.38 | 25.32 |
| 5726 | 68.12 | 56.29 | 40.86 | 30.43 | 25.38 |
| 5728 | 68.08 | 56.25 | 40.85 | 30.44 | 25.37 |
| 5730 | 68.01 | 56.2  | 40.83 | 30.42 | 25.36 |
| 5732 | 67.97 | 56.17 | 40.81 | 30.42 | 25.37 |
| 5734 | 67.9  | 56.13 | 40.79 | 30.42 | 25.37 |
| 5736 | 67.82 | 56.07 | 40.75 | 30.39 | 25.36 |
| 5738 | 67.78 | 56.05 | 40.75 | 30.41 | 25.36 |
| 5740 | 67.73 | 56.02 | 40.73 | 30.41 | 25.35 |
| 5742 | 67.64 | 55.95 | 40.69 | 30.39 | 25.34 |
| 5744 | 67.57 | 55.9  | 40.67 | 30.37 | 25.32 |
| 5746 | 67.55 | 55.88 | 40.68 | 30.39 | 25.35 |
| 5748 | 67.47 | 55.84 | 40.66 | 30.37 | 25.33 |
| 5750 | 67.41 | 55.78 | 40.62 | 30.36 | 25.32 |
| 5752 | 67.34 | 55.73 | 40.59 | 30.33 | 25.31 |
| 5754 | 67.26 | 55.67 | 40.55 | 30.29 | 25.27 |
| 5756 | 67.24 | 55.67 | 40.56 | 30.33 | 25.31 |
| 5758 | 67.19 | 55.63 | 40.56 | 30.33 | 25.32 |
| 5760 | 67.14 | 55.59 | 40.55 | 30.34 | 25.31 |
| 5762 | 67.08 | 55.55 | 40.53 | 30.33 | 25.31 |
| 5764 | 67.03 | 55.52 | 40.5  | 30.31 | 25.31 |
| 5766 | 66.96 | 55.48 | 40.48 | 30.31 | 25.31 |
| 5768 | 66.9  | 55.43 | 40.48 | 30.32 | 25.32 |
| 5770 | 66.87 | 55.42 | 40.48 | 30.34 | 25.35 |
| 5772 | 66.81 | 55.39 | 40.46 | 30.32 | 25.32 |
| 5774 | 66.76 | 55.34 | 40.44 | 30.32 | 25.35 |
| 5776 | 66.67 | 55.26 | 40.39 | 30.27 | 25.3  |
| 5778 | 66.61 | 55.21 | 40.36 | 30.26 | 25.27 |
| 5780 | 66.55 | 55.17 | 40.33 | 30.25 | 25.27 |
| 5782 | 66.51 | 55.15 | 40.34 | 30.27 | 25.29 |
| 5784 | 66.45 | 55.11 | 40.32 | 30.28 | 25.28 |
| 5786 | 66.42 | 55.08 | 40.31 | 30.28 | 25.3  |
| 5788 | 66.37 | 55.06 | 40.29 | 30.27 | 25.3  |
| 5790 | 66.26 | 54.97 | 40.23 | 30.23 | 25.26 |
| 5792 | 66.21 | 54.93 | 40.22 | 30.23 | 25.26 |
| 5794 | 66.13 | 54.87 | 40.17 | 30.19 | 25.21 |
| 5796 | 66.07 | 54.82 | 40.16 | 30.19 | 25.21 |
| 5798 | 66.03 | 54.8  | 40.15 | 30.2  | 25.23 |
| 5800 | 65.98 | 54.77 | 40.13 | 30.18 | 25.21 |
| 5802 | 65.95 | 54.75 | 40.13 | 30.18 | 25.22 |
| 5804 | 65.88 | 54.7  | 40.1  | 30.18 | 25.22 |
| 5806 | 65.79 | 54.63 | 40.06 | 30.14 | 25.19 |

|      |       |       |       |       |       |
|------|-------|-------|-------|-------|-------|
| 5808 | 65.75 | 54.59 | 40.04 | 30.13 | 25.21 |
| 5810 | 65.67 | 54.54 | 40.01 | 30.11 | 25.18 |
| 5812 | 65.61 | 54.49 | 39.99 | 30.1  | 25.17 |
| 5814 | 65.56 | 54.46 | 39.97 | 30.09 | 25.17 |
| 5816 | 65.49 | 54.42 | 39.95 | 30.09 | 25.16 |
| 5818 | 65.44 | 54.38 | 39.93 | 30.09 | 25.16 |
| 5820 | 65.4  | 54.35 | 39.94 | 30.09 | 25.17 |
| 5822 | 65.33 | 54.32 | 39.91 | 30.1  | 25.17 |
| 5824 | 65.28 | 54.27 | 39.88 | 30.07 | 25.16 |
| 5826 | 65.27 | 54.27 | 39.9  | 30.1  | 25.18 |
| 5828 | 65.18 | 54.22 | 39.87 | 30.08 | 25.15 |
| 5830 | 65.14 | 54.17 | 39.86 | 30.08 | 25.16 |
| 5832 | 65.11 | 54.17 | 39.86 | 30.11 | 25.19 |
| 5834 | 65.03 | 54.11 | 39.82 | 30.08 | 25.17 |
| 5836 | 64.97 | 54.06 | 39.8  | 30.06 | 25.15 |
| 5838 | 64.92 | 54.02 | 39.78 | 30.07 | 25.15 |
| 5840 | 64.85 | 53.98 | 39.75 | 30.05 | 25.14 |
| 5842 | 64.79 | 53.92 | 39.72 | 30.03 | 25.11 |
| 5844 | 64.73 | 53.88 | 39.69 | 30.02 | 25.11 |
| 5846 | 64.69 | 53.85 | 39.69 | 30    | 25.12 |
| 5848 | 64.63 | 53.8  | 39.66 | 29.99 | 25.12 |
| 5850 | 64.59 | 53.78 | 39.65 | 30    | 25.11 |
| 5852 | 64.53 | 53.73 | 39.62 | 29.98 | 25.1  |
| 5854 | 64.52 | 53.74 | 39.65 | 30.02 | 25.14 |
| 5856 | 64.48 | 53.71 | 39.65 | 30.03 | 25.15 |
| 5858 | 64.39 | 53.66 | 39.6  | 30.01 | 25.13 |
| 5860 | 64.36 | 53.64 | 39.61 | 30.02 | 25.15 |
| 5862 | 64.31 | 53.6  | 39.59 | 30.01 | 25.14 |
| 5864 | 64.24 | 53.55 | 39.57 | 29.99 | 25.13 |
| 5866 | 64.21 | 53.52 | 39.56 | 29.99 | 25.13 |
| 5868 | 64.15 | 53.49 | 39.54 | 29.99 | 25.13 |
| 5870 | 64.13 | 53.49 | 39.55 | 30.02 | 25.16 |
| 5872 | 64.06 | 53.42 | 39.51 | 29.98 | 25.14 |
| 5874 | 64    | 53.37 | 39.49 | 29.97 | 25.12 |
| 5876 | 63.93 | 53.32 | 39.46 | 29.95 | 25.11 |
| 5878 | 63.86 | 53.27 | 39.43 | 29.95 | 25.1  |
| 5880 | 63.8  | 53.23 | 39.42 | 29.93 | 25.11 |
| 5882 | 63.78 | 53.22 | 39.41 | 29.94 | 25.11 |
| 5884 | 63.69 | 53.16 | 39.38 | 29.92 | 25.09 |
| 5886 | 63.66 | 53.13 | 39.37 | 29.92 | 25.09 |
| 5888 | 63.59 | 53.09 | 39.34 | 29.91 | 25.08 |
| 5890 | 63.57 | 53.08 | 39.34 | 29.93 | 25.09 |
| 5892 | 63.49 | 53.01 | 39.31 | 29.9  | 25.09 |
| 5894 | 63.46 | 52.99 | 39.31 | 29.92 | 25.09 |

|      |       |       |       |       |       |
|------|-------|-------|-------|-------|-------|
| 5896 | 63.41 | 52.96 | 39.29 | 29.92 | 25.09 |
| 5898 | 63.35 | 52.91 | 39.27 | 29.91 | 25.06 |
| 5900 | 63.31 | 52.89 | 39.26 | 29.91 | 25.08 |
| 5902 | 63.22 | 52.83 | 39.24 | 29.9  | 25.06 |
| 5904 | 63.19 | 52.8  | 39.23 | 29.9  | 25.07 |
| 5906 | 63.15 | 52.79 | 39.21 | 29.9  | 25.07 |
| 5908 | 63.1  | 52.75 | 39.19 | 29.89 | 25.07 |
| 5910 | 63.04 | 52.7  | 39.18 | 29.89 | 25.07 |
| 5912 | 62.99 | 52.66 | 39.15 | 29.88 | 25.06 |
| 5914 | 62.94 | 52.62 | 39.14 | 29.86 | 25.06 |
| 5916 | 62.9  | 52.6  | 39.13 | 29.86 | 25.07 |
| 5918 | 62.84 | 52.55 | 39.1  | 29.84 | 25.05 |
| 5920 | 62.79 | 52.52 | 39.08 | 29.84 | 25.05 |
| 5922 | 62.74 | 52.48 | 39.07 | 29.83 | 25.05 |
| 5924 | 62.67 | 52.43 | 39.03 | 29.8  | 25.03 |
| 5926 | 62.62 | 52.39 | 39.03 | 29.8  | 25.03 |
| 5928 | 62.56 | 52.35 | 39    | 29.79 | 25.01 |
| 5930 | 62.52 | 52.32 | 38.97 | 29.78 | 25    |
| 5932 | 62.49 | 52.3  | 38.98 | 29.81 | 25.01 |
| 5934 | 62.45 | 52.27 | 38.97 | 29.82 | 25.03 |
| 5936 | 62.38 | 52.21 | 38.93 | 29.76 | 24.98 |
| 5938 | 62.31 | 52.16 | 38.89 | 29.75 | 24.97 |
| 5940 | 62.28 | 52.14 | 38.89 | 29.77 | 24.98 |
| 5942 | 62.2  | 52.08 | 38.85 | 29.75 | 24.96 |
| 5944 | 62.18 | 52.07 | 38.86 | 29.76 | 24.99 |
| 5946 | 62.13 | 52.03 | 38.84 | 29.76 | 25    |
| 5948 | 62.05 | 51.97 | 38.8  | 29.71 | 24.95 |
| 5950 | 62.02 | 51.96 | 38.81 | 29.73 | 24.98 |
| 5952 | 61.99 | 51.95 | 38.81 | 29.74 | 25    |
| 5954 | 61.95 | 51.92 | 38.79 | 29.73 | 25    |
| 5956 | 61.88 | 51.87 | 38.77 | 29.71 | 24.98 |
| 5958 | 61.84 | 51.84 | 38.76 | 29.72 | 24.99 |
| 5960 | 61.79 | 51.8  | 38.74 | 29.72 | 24.99 |
| 5962 | 61.75 | 51.78 | 38.73 | 29.71 | 24.99 |
| 5964 | 61.7  | 51.76 | 38.73 | 29.73 | 25    |
| 5966 | 61.64 | 51.71 | 38.7  | 29.72 | 24.99 |
| 5968 | 61.6  | 51.68 | 38.69 | 29.73 | 24.98 |
| 5970 | 61.57 | 51.66 | 38.69 | 29.73 | 25    |
| 5972 | 61.47 | 51.59 | 38.64 | 29.68 | 24.96 |
| 5974 | 61.45 | 51.58 | 38.64 | 29.7  | 24.98 |
| 5976 | 61.41 | 51.57 | 38.65 | 29.71 | 25    |
| 5978 | 61.37 | 51.54 | 38.63 | 29.7  | 24.98 |
| 5980 | 61.31 | 51.52 | 38.63 | 29.72 | 24.99 |
| 5982 | 61.25 | 51.45 | 38.58 | 29.68 | 24.97 |

|      |       |       |       |       |       |
|------|-------|-------|-------|-------|-------|
| 5984 | 61.2  | 51.41 | 38.56 | 29.65 | 24.96 |
| 5986 | 61.15 | 51.38 | 38.54 | 29.65 | 24.96 |
| 5988 | 61.09 | 51.35 | 38.52 | 29.64 | 24.95 |
| 5990 | 61.05 | 51.31 | 38.5  | 29.64 | 24.96 |
| 5992 | 61    | 51.28 | 38.49 | 29.63 | 24.96 |
| 5994 | 60.95 | 51.24 | 38.47 | 29.62 | 24.95 |
| 5996 | 60.9  | 51.21 | 38.46 | 29.62 | 24.95 |
| 5998 | 60.85 | 51.17 | 38.44 | 29.63 | 24.95 |
| 6000 | 60.8  | 51.14 | 38.43 | 29.63 | 24.94 |
| 6002 | 60.77 | 51.11 | 38.42 | 29.63 | 24.95 |
| 6004 | 60.72 | 51.08 | 38.4  | 29.63 | 24.93 |
| 6006 | 60.67 | 51.05 | 38.38 | 29.62 | 24.93 |
| 6008 | 60.58 | 50.98 | 38.33 | 29.57 | 24.88 |
| 6010 | 60.58 | 50.98 | 38.35 | 29.6  | 24.93 |
| 6012 | 60.53 | 50.95 | 38.34 | 29.6  | 24.92 |
| 6014 | 60.49 | 50.91 | 38.32 | 29.59 | 24.92 |
| 6016 | 60.43 | 50.88 | 38.3  | 29.58 | 24.92 |
| 6018 | 60.4  | 50.86 | 38.3  | 29.58 | 24.92 |
| 6020 | 60.36 | 50.82 | 38.28 | 29.58 | 24.91 |
| 6022 | 60.3  | 50.79 | 38.26 | 29.57 | 24.91 |
| 6024 | 60.26 | 50.76 | 38.25 | 29.58 | 24.92 |
| 6026 | 60.21 | 50.72 | 38.23 | 29.57 | 24.9  |
| 6028 | 60.15 | 50.68 | 38.21 | 29.55 | 24.9  |
| 6030 | 60.11 | 50.64 | 38.2  | 29.54 | 24.9  |
| 6032 | 60.06 | 50.61 | 38.17 | 29.53 | 24.9  |
| 6034 | 60    | 50.57 | 38.14 | 29.5  | 24.88 |
| 6036 | 59.94 | 50.52 | 38.13 | 29.49 | 24.88 |
| 6038 | 59.92 | 50.5  | 38.12 | 29.5  | 24.88 |
| 6040 | 59.86 | 50.46 | 38.08 | 29.48 | 24.88 |
| 6042 | 59.83 | 50.45 | 38.09 | 29.49 | 24.88 |
| 6044 | 59.76 | 50.39 | 38.06 | 29.46 | 24.87 |
| 6046 | 59.73 | 50.38 | 38.07 | 29.48 | 24.87 |
| 6048 | 59.7  | 50.36 | 38.06 | 29.5  | 24.87 |
| 6050 | 59.65 | 50.33 | 38.04 | 29.5  | 24.87 |
| 6052 | 59.61 | 50.3  | 38.03 | 29.49 | 24.86 |
| 6054 | 59.52 | 50.23 | 38    | 29.47 | 24.85 |
| 6056 | 59.49 | 50.21 | 37.99 | 29.47 | 24.86 |
| 6058 | 59.46 | 50.18 | 37.96 | 29.45 | 24.85 |
| 6060 | 59.41 | 50.16 | 37.97 | 29.46 | 24.86 |
| 6062 | 59.37 | 50.13 | 37.95 | 29.47 | 24.86 |
| 6064 | 59.32 | 50.09 | 37.94 | 29.45 | 24.85 |
| 6066 | 59.28 | 50.06 | 37.91 | 29.45 | 24.85 |
| 6068 | 59.22 | 50.02 | 37.9  | 29.43 | 24.85 |
| 6070 | 59.13 | 49.95 | 37.83 | 29.37 | 24.79 |

|      |       |       |       |       |       |
|------|-------|-------|-------|-------|-------|
| 6072 | 59.13 | 49.95 | 37.86 | 29.41 | 24.83 |
| 6074 | 59.08 | 49.92 | 37.84 | 29.4  | 24.83 |
| 6076 | 59.04 | 49.9  | 37.83 | 29.4  | 24.83 |
| 6078 | 58.99 | 49.86 | 37.81 | 29.39 | 24.83 |
| 6080 | 58.94 | 49.83 | 37.8  | 29.38 | 24.82 |
| 6082 | 58.89 | 49.79 | 37.78 | 29.38 | 24.8  |
| 6084 | 58.83 | 49.74 | 37.77 | 29.38 | 24.8  |
| 6086 | 58.8  | 49.73 | 37.75 | 29.39 | 24.8  |
| 6088 | 58.78 | 49.71 | 37.74 | 29.39 | 24.82 |
| 6090 | 58.72 | 49.68 | 37.73 | 29.38 | 24.82 |
| 6092 | 58.68 | 49.65 | 37.72 | 29.38 | 24.82 |
| 6094 | 58.63 | 49.62 | 37.7  | 29.38 | 24.82 |
| 6096 | 58.59 | 49.58 | 37.69 | 29.37 | 24.81 |
| 6098 | 58.53 | 49.54 | 37.66 | 29.35 | 24.79 |
| 6100 | 58.47 | 49.5  | 37.63 | 29.33 | 24.79 |
| 6102 | 58.45 | 49.48 | 37.64 | 29.33 | 24.81 |
| 6104 | 58.4  | 49.44 | 37.62 | 29.32 | 24.8  |
| 6106 | 58.36 | 49.42 | 37.61 | 29.32 | 24.79 |
| 6108 | 58.31 | 49.39 | 37.6  | 29.32 | 24.79 |
| 6110 | 58.27 | 49.36 | 37.58 | 29.31 | 24.79 |
| 6112 | 58.22 | 49.33 | 37.56 | 29.31 | 24.79 |
| 6114 | 58.18 | 49.3  | 37.55 | 29.3  | 24.78 |
| 6116 | 58.11 | 49.24 | 37.52 | 29.28 | 24.77 |
| 6118 | 58.06 | 49.21 | 37.5  | 29.27 | 24.76 |
| 6120 | 58.03 | 49.18 | 37.48 | 29.25 | 24.76 |
| 6122 | 58    | 49.17 | 37.48 | 29.27 | 24.77 |
| 6124 | 57.91 | 49.09 | 37.43 | 29.23 | 24.73 |
| 6126 | 57.91 | 49.1  | 37.45 | 29.26 | 24.76 |
| 6128 | 57.87 | 49.07 | 37.44 | 29.26 | 24.77 |
| 6130 | 57.81 | 49.02 | 37.41 | 29.23 | 24.73 |
| 6132 | 57.75 | 48.97 | 37.37 | 29.21 | 24.7  |
| 6134 | 57.7  | 48.94 | 37.36 | 29.21 | 24.72 |
| 6136 | 57.67 | 48.92 | 37.35 | 29.21 | 24.73 |
| 6138 | 57.63 | 48.89 | 37.33 | 29.21 | 24.71 |
| 6140 | 57.59 | 48.86 | 37.31 | 29.22 | 24.71 |
| 6142 | 57.54 | 48.83 | 37.32 | 29.22 | 24.71 |
| 6144 | 57.52 | 48.82 | 37.31 | 29.23 | 24.73 |
| 6146 | 57.47 | 48.79 | 37.3  | 29.22 | 24.73 |
| 6148 | 57.44 | 48.78 | 37.3  | 29.22 | 24.74 |
| 6150 | 57.39 | 48.73 | 37.29 | 29.22 | 24.73 |
| 6152 | 57.31 | 48.65 | 37.21 | 29.16 | 24.67 |
| 6154 | 57.26 | 48.62 | 37.2  | 29.15 | 24.66 |
| 6156 | 57.23 | 48.61 | 37.19 | 29.14 | 24.68 |
| 6158 | 57.22 | 48.61 | 37.23 | 29.17 | 24.72 |

|      |       |       |       |       |       |
|------|-------|-------|-------|-------|-------|
| 6160 | 57.18 | 48.58 | 37.21 | 29.17 | 24.72 |
| 6162 | 57.14 | 48.56 | 37.19 | 29.16 | 24.7  |
| 6164 | 57.09 | 48.53 | 37.18 | 29.16 | 24.7  |
| 6166 | 57.06 | 48.5  | 37.16 | 29.17 | 24.72 |
| 6168 | 57.02 | 48.47 | 37.15 | 29.16 | 24.71 |
| 6170 | 56.98 | 48.44 | 37.14 | 29.15 | 24.71 |
| 6172 | 56.93 | 48.41 | 37.13 | 29.15 | 24.7  |
| 6174 | 56.86 | 48.35 | 37.1  | 29.13 | 24.69 |
| 6176 | 56.82 | 48.32 | 37.07 | 29.11 | 24.67 |
| 6178 | 56.8  | 48.31 | 37.08 | 29.13 | 24.69 |
| 6180 | 56.74 | 48.27 | 37.06 | 29.12 | 24.68 |
| 6182 | 56.7  | 48.25 | 37.04 | 29.11 | 24.67 |
| 6184 | 56.68 | 48.23 | 37.04 | 29.12 | 24.69 |
| 6186 | 56.59 | 48.16 | 36.98 | 29.08 | 24.66 |
| 6188 | 56.56 | 48.16 | 36.99 | 29.09 | 24.66 |
| 6190 | 56.52 | 48.12 | 36.97 | 29.08 | 24.65 |
| 6192 | 56.45 | 48.06 | 36.93 | 29.04 | 24.63 |
| 6194 | 56.42 | 48.05 | 36.94 | 29.06 | 24.65 |
| 6196 | 56.41 | 48.04 | 36.94 | 29.07 | 24.66 |
| 6198 | 56.36 | 48.01 | 36.92 | 29.06 | 24.65 |
| 6200 | 56.31 | 47.98 | 36.91 | 29.06 | 24.65 |
| 6202 | 56.26 | 47.94 | 36.88 | 29.04 | 24.65 |
| 6204 | 56.24 | 47.93 | 36.9  | 29.06 | 24.66 |
| 6206 | 56.2  | 47.89 | 36.88 | 29.05 | 24.65 |
| 6208 | 56.15 | 47.87 | 36.85 | 29.04 | 24.64 |
| 6210 | 56.1  | 47.82 | 36.82 | 29.03 | 24.63 |
| 6212 | 56.07 | 47.82 | 36.83 | 29.03 | 24.63 |
| 6214 | 56.04 | 47.79 | 36.83 | 29.04 | 24.65 |
| 6216 | 55.98 | 47.75 | 36.79 | 29.02 | 24.64 |
| 6218 | 55.94 | 47.72 | 36.77 | 29.02 | 24.63 |
| 6220 | 55.88 | 47.68 | 36.75 | 28.99 | 24.61 |
| 6222 | 55.84 | 47.65 | 36.74 | 29    | 24.62 |
| 6224 | 55.83 | 47.66 | 36.76 | 29.02 | 24.63 |
| 6226 | 55.74 | 47.58 | 36.69 | 28.96 | 24.58 |
| 6228 | 55.69 | 47.54 | 36.67 | 28.95 | 24.57 |
| 6230 | 55.65 | 47.52 | 36.66 | 28.95 | 24.58 |
| 6232 | 55.6  | 47.48 | 36.64 | 28.93 | 24.57 |
| 6234 | 55.58 | 47.46 | 36.63 | 28.93 | 24.57 |
| 6236 | 55.52 | 47.43 | 36.61 | 28.92 | 24.56 |
| 6238 | 55.48 | 47.4  | 36.61 | 28.93 | 24.55 |
| 6240 | 55.46 | 47.39 | 36.61 | 28.96 | 24.57 |
| 6242 | 55.45 | 47.39 | 36.62 | 28.98 | 24.6  |
| 6244 | 55.41 | 47.36 | 36.61 | 28.96 | 24.58 |
| 6246 | 55.33 | 47.3  | 36.55 | 28.92 | 24.56 |

|      |       |       |       |       |       |
|------|-------|-------|-------|-------|-------|
| 6248 | 55.31 | 47.28 | 36.54 | 28.93 | 24.56 |
| 6250 | 55.25 | 47.24 | 36.52 | 28.91 | 24.54 |
| 6252 | 55.2  | 47.21 | 36.52 | 28.91 | 24.55 |
| 6254 | 55.2  | 47.22 | 36.53 | 28.93 | 24.59 |
| 6256 | 55.14 | 47.18 | 36.5  | 28.91 | 24.57 |
| 6258 | 55.12 | 47.17 | 36.49 | 28.9  | 24.56 |
| 6260 | 55.09 | 47.15 | 36.49 | 28.92 | 24.58 |
| 6262 | 55.04 | 47.11 | 36.48 | 28.9  | 24.57 |
| 6264 | 55    | 47.09 | 36.47 | 28.9  | 24.56 |
| 6266 | 54.96 | 47.06 | 36.45 | 28.91 | 24.58 |
| 6268 | 54.94 | 47.05 | 36.46 | 28.91 | 24.59 |
| 6270 | 54.89 | 47.01 | 36.44 | 28.89 | 24.56 |
| 6272 | 54.86 | 46.99 | 36.43 | 28.9  | 24.58 |
| 6274 | 54.77 | 46.91 | 36.36 | 28.84 | 24.52 |
| 6276 | 54.77 | 46.93 | 36.39 | 28.88 | 24.57 |
| 6278 | 54.73 | 46.89 | 36.38 | 28.85 | 24.55 |
| 6280 | 54.69 | 46.87 | 36.37 | 28.86 | 24.55 |
| 6282 | 54.65 | 46.86 | 36.35 | 28.87 | 24.56 |
| 6284 | 54.62 | 46.83 | 36.35 | 28.86 | 24.56 |
| 6286 | 54.54 | 46.75 | 36.29 | 28.83 | 24.54 |
| 6288 | 54.49 | 46.72 | 36.27 | 28.83 | 24.52 |
| 6290 | 54.49 | 46.74 | 36.3  | 28.86 | 24.54 |
| 6292 | 54.45 | 46.7  | 36.27 | 28.85 | 24.53 |
| 6294 | 54.42 | 46.68 | 36.26 | 28.85 | 24.53 |
| 6296 | 54.38 | 46.67 | 36.27 | 28.85 | 24.54 |
| 6298 | 54.31 | 46.6  | 36.21 | 28.81 | 24.51 |
| 6300 | 54.26 | 46.55 | 36.19 | 28.79 | 24.49 |
| 6302 | 54.24 | 46.55 | 36.2  | 28.81 | 24.51 |
| 6304 | 54.18 | 46.5  | 36.17 | 28.78 | 24.48 |
| 6306 | 54.13 | 46.48 | 36.16 | 28.78 | 24.48 |
| 6308 | 54.14 | 46.48 | 36.18 | 28.8  | 24.52 |
| 6310 | 54.06 | 46.43 | 36.12 | 28.76 | 24.48 |
| 6312 | 54.04 | 46.41 | 36.12 | 28.77 | 24.49 |
| 6314 | 54.03 | 46.4  | 36.13 | 28.78 | 24.51 |
| 6316 | 53.94 | 46.33 | 36.08 | 28.74 | 24.47 |
| 6318 | 53.9  | 46.31 | 36.07 | 28.72 | 24.46 |
| 6320 | 53.87 | 46.28 | 36.05 | 28.74 | 24.47 |
| 6322 | 53.83 | 46.25 | 36.04 | 28.73 | 24.46 |
| 6324 | 53.78 | 46.21 | 36.02 | 28.71 | 24.45 |
| 6326 | 53.73 | 46.17 | 35.98 | 28.68 | 24.42 |
| 6328 | 53.67 | 46.14 | 35.97 | 28.67 | 24.42 |
| 6330 | 53.66 | 46.13 | 35.97 | 28.68 | 24.43 |
| 6332 | 53.62 | 46.11 | 35.96 | 28.69 | 24.44 |
| 6334 | 53.58 | 46.08 | 35.95 | 28.68 | 24.44 |



|      |       |       |       |       |       |
|------|-------|-------|-------|-------|-------|
| 6336 | 53.54 | 46.06 | 35.94 | 28.68 | 24.44 |
| 6338 | 53.5  | 46.02 | 35.92 | 28.67 | 24.43 |
| 6340 | 53.46 | 46    | 35.91 | 28.68 | 24.43 |
| 6342 | 53.46 | 46.01 | 35.92 | 28.69 | 24.45 |
| 6344 | 53.42 | 45.98 | 35.92 | 28.7  | 24.45 |
| 6346 | 53.35 | 45.93 | 35.88 | 28.67 | 24.43 |
| 6348 | 53.34 | 45.93 | 35.89 | 28.69 | 24.44 |
| 6350 | 53.32 | 45.92 | 35.91 | 28.71 | 24.48 |
| 6352 | 53.29 | 45.9  | 35.88 | 28.7  | 24.47 |
| 6354 | 53.26 | 45.88 | 35.88 | 28.7  | 24.48 |
| 6356 | 53.21 | 45.83 | 35.87 | 28.69 | 24.47 |
| 6358 | 53.13 | 45.77 | 35.8  | 28.64 | 24.43 |
| 6360 | 53.14 | 45.79 | 35.84 | 28.68 | 24.47 |
| 6362 | 53.11 | 45.78 | 35.84 | 28.68 | 24.47 |
| 6364 | 53.07 | 45.73 | 35.8  | 28.66 | 24.44 |
| 6366 | 53.01 | 45.69 | 35.77 | 28.64 | 24.42 |
| 6368 | 52.94 | 45.64 | 35.74 | 28.61 | 24.4  |
| 6370 | 52.88 | 45.59 | 35.71 | 28.58 | 24.37 |
| 6372 | 52.88 | 45.61 | 35.74 | 28.64 | 24.43 |
| 6374 | 52.86 | 45.6  | 35.75 | 28.64 | 24.44 |
| 6376 | 52.84 | 45.6  | 35.75 | 28.66 | 24.44 |
| 6378 | 52.77 | 45.53 | 35.71 | 28.62 | 24.42 |
| 6380 | 52.77 | 45.54 | 35.73 | 28.65 | 24.45 |
| 6382 | 52.73 | 45.51 | 35.7  | 28.63 | 24.43 |
| 6384 | 52.69 | 45.5  | 35.71 | 28.65 | 24.45 |
| 6386 | 52.67 | 45.47 | 35.7  | 28.64 | 24.45 |
| 6388 | 52.63 | 45.44 | 35.68 | 28.63 | 24.44 |
| 6390 | 52.56 | 45.4  | 35.65 | 28.61 | 24.41 |
| 6392 | 52.51 | 45.35 | 35.61 | 28.59 | 24.38 |
| 6394 | 52.52 | 45.36 | 35.64 | 28.63 | 24.42 |
| 6396 | 52.49 | 45.35 | 35.64 | 28.63 | 24.44 |
| 6398 | 52.45 | 45.32 | 35.62 | 28.62 | 24.43 |
| 6400 | 52.41 | 45.3  | 35.61 | 28.62 | 24.44 |
| 6402 | 52.35 | 45.25 | 35.57 | 28.6  | 24.41 |
| 6404 | 52.34 | 45.25 | 35.59 | 28.61 | 24.42 |
| 6406 | 52.3  | 45.22 | 35.58 | 28.59 | 24.43 |
| 6408 | 52.26 | 45.2  | 35.55 | 28.58 | 24.42 |
| 6410 | 52.22 | 45.17 | 35.54 | 28.58 | 24.42 |
| 6412 | 52.17 | 45.12 | 35.51 | 28.57 | 24.41 |
| 6414 | 52.15 | 45.12 | 35.52 | 28.57 | 24.42 |
| 6416 | 52.12 | 45.09 | 35.52 | 28.59 | 24.44 |
| 6418 | 52.12 | 45.1  | 35.54 | 28.61 | 24.46 |
| 6420 | 52.08 | 45.09 | 35.51 | 28.59 | 24.45 |
| 6422 | 52.04 | 45.04 | 35.5  | 28.6  | 24.46 |

|      |       |       |       |       |       |
|------|-------|-------|-------|-------|-------|
| 6424 | 51.98 | 45    | 35.47 | 28.57 | 24.43 |
| 6426 | 51.95 | 44.98 | 35.46 | 28.57 | 24.42 |
| 6428 | 51.92 | 44.96 | 35.46 | 28.58 | 24.4  |
| 6430 | 51.87 | 44.92 | 35.43 | 28.56 | 24.41 |
| 6432 | 51.83 | 44.9  | 35.42 | 28.55 | 24.41 |
| 6434 | 51.81 | 44.89 | 35.42 | 28.57 | 24.43 |
| 6436 | 51.74 | 44.82 | 35.38 | 28.54 | 24.4  |
| 6438 | 51.72 | 44.81 | 35.38 | 28.53 | 24.39 |
| 6440 | 51.7  | 44.8  | 35.37 | 28.53 | 24.4  |
| 6442 | 51.64 | 44.75 | 35.34 | 28.5  | 24.35 |
| 6444 | 51.6  | 44.73 | 35.32 | 28.5  | 24.37 |
| 6446 | 51.59 | 44.73 | 35.34 | 28.53 | 24.39 |
| 6448 | 51.55 | 44.69 | 35.32 | 28.51 | 24.37 |
| 6450 | 51.5  | 44.66 | 35.3  | 28.51 | 24.38 |
| 6452 | 51.48 | 44.65 | 35.3  | 28.51 | 24.39 |
| 6454 | 51.45 | 44.62 | 35.29 | 28.49 | 24.38 |
| 6456 | 51.42 | 44.6  | 35.28 | 28.49 | 24.38 |
| 6458 | 51.34 | 44.55 | 35.24 | 28.46 | 24.35 |
| 6460 | 51.34 | 44.55 | 35.25 | 28.49 | 24.37 |
| 6462 | 51.32 | 44.53 | 35.25 | 28.49 | 24.37 |
| 6464 | 51.27 | 44.49 | 35.21 | 28.46 | 24.35 |
| 6466 | 51.2  | 44.43 | 35.16 | 28.43 | 24.32 |
| 6468 | 51.21 | 44.45 | 35.2  | 28.48 | 24.37 |
| 6470 | 51.16 | 44.41 | 35.17 | 28.45 | 24.33 |
| 6472 | 51.12 | 44.39 | 35.17 | 28.46 | 24.36 |
| 6474 | 51.07 | 44.36 | 35.15 | 28.44 | 24.34 |
| 6476 | 51.07 | 44.36 | 35.16 | 28.46 | 24.37 |
| 6478 | 51.04 | 44.33 | 35.15 | 28.46 | 24.36 |
| 6480 | 51    | 44.31 | 35.14 | 28.45 | 24.36 |
| 6482 | 50.97 | 44.29 | 35.12 | 28.44 | 24.36 |
| 6484 | 50.9  | 44.23 | 35.08 | 28.4  | 24.32 |
| 6486 | 50.89 | 44.23 | 35.09 | 28.42 | 24.35 |
| 6488 | 50.86 | 44.21 | 35.08 | 28.42 | 24.35 |
| 6490 | 50.81 | 44.18 | 35.06 | 28.4  | 24.33 |
| 6492 | 50.78 | 44.14 | 35.04 | 28.39 | 24.34 |
| 6494 | 50.75 | 44.12 | 35.03 | 28.39 | 24.33 |
| 6496 | 50.71 | 44.1  | 35.02 | 28.38 | 24.33 |
| 6498 | 50.69 | 44.09 | 35.02 | 28.39 | 24.33 |
| 6500 | 50.67 | 44.07 | 35.02 | 28.4  | 24.34 |
| 6502 | 50.62 | 44.04 | 35.01 | 28.39 | 24.32 |
| 6504 | 50.59 | 44.03 | 35    | 28.41 | 24.33 |
| 6506 | 50.52 | 43.96 | 34.94 | 28.36 | 24.29 |
| 6508 | 50.52 | 43.96 | 34.96 | 28.38 | 24.32 |
| 6510 | 50.46 | 43.93 | 34.93 | 28.35 | 24.31 |

|      |       |       |       |       |       |
|------|-------|-------|-------|-------|-------|
| 6512 | 50.39 | 43.87 | 34.89 | 28.31 | 24.27 |
| 6514 | 50.36 | 43.85 | 34.88 | 28.31 | 24.26 |
| 6516 | 50.35 | 43.85 | 34.89 | 28.33 | 24.28 |
| 6518 | 50.33 | 43.83 | 34.88 | 28.33 | 24.29 |
| 6520 | 50.29 | 43.81 | 34.87 | 28.34 | 24.28 |
| 6522 | 50.29 | 43.81 | 34.89 | 28.36 | 24.32 |
| 6524 | 50.24 | 43.76 | 34.86 | 28.33 | 24.29 |
| 6526 | 50.16 | 43.7  | 34.81 | 28.29 | 24.26 |
| 6528 | 50.12 | 43.68 | 34.79 | 28.28 | 24.25 |
| 6530 | 50.12 | 43.69 | 34.8  | 28.3  | 24.27 |
| 6532 | 50.09 | 43.65 | 34.79 | 28.3  | 24.27 |
| 6534 | 50.06 | 43.64 | 34.79 | 28.29 | 24.28 |
| 6536 | 50    | 43.58 | 34.75 | 28.26 | 24.24 |
| 6538 | 50    | 43.6  | 34.77 | 28.29 | 24.29 |
| 6540 | 49.98 | 43.59 | 34.77 | 28.3  | 24.29 |
| 6542 | 49.91 | 43.55 | 34.74 | 28.28 | 24.26 |
| 6544 | 49.92 | 43.56 | 34.77 | 28.31 | 24.29 |
| 6546 | 49.89 | 43.52 | 34.74 | 28.3  | 24.28 |
| 6548 | 49.85 | 43.5  | 34.73 | 28.29 | 24.28 |
| 6550 | 49.81 | 43.47 | 34.73 | 28.28 | 24.28 |
| 6552 | 49.78 | 43.44 | 34.7  | 28.26 | 24.26 |
| 6554 | 49.76 | 43.43 | 34.7  | 28.26 | 24.28 |
| 6556 | 49.68 | 43.39 | 34.67 | 28.23 | 24.24 |
| 6558 | 49.67 | 43.38 | 34.66 | 28.26 | 24.28 |
| 6560 | 49.61 | 43.31 | 34.61 | 28.2  | 24.23 |
| 6562 | 49.58 | 43.29 | 34.61 | 28.21 | 24.23 |
| 6564 | 49.57 | 43.3  | 34.62 | 28.23 | 24.25 |
| 6566 | 49.51 | 43.23 | 34.58 | 28.2  | 24.22 |
| 6568 | 49.49 | 43.23 | 34.59 | 28.21 | 24.25 |
| 6570 | 49.48 | 43.24 | 34.6  | 28.23 | 24.25 |
| 6572 | 49.44 | 43.22 | 34.6  | 28.24 | 24.27 |
| 6574 | 49.38 | 43.15 | 34.54 | 28.18 | 24.21 |
| 6576 | 49.39 | 43.18 | 34.57 | 28.23 | 24.26 |
| 6578 | 49.37 | 43.17 | 34.57 | 28.24 | 24.27 |
| 6580 | 49.34 | 43.15 | 34.56 | 28.23 | 24.27 |
| 6582 | 49.29 | 43.11 | 34.53 | 28.21 | 24.25 |
| 6584 | 49.27 | 43.1  | 34.54 | 28.22 | 24.27 |
| 6586 | 49.24 | 43.08 | 34.53 | 28.2  | 24.26 |
| 6588 | 49.2  | 43.06 | 34.52 | 28.2  | 24.26 |
| 6590 | 49.14 | 43    | 34.49 | 28.18 | 24.23 |
| 6592 | 49.12 | 43    | 34.47 | 28.18 | 24.23 |
| 6594 | 49.1  | 42.97 | 34.47 | 28.17 | 24.24 |
| 6596 | 49.05 | 42.95 | 34.45 | 28.15 | 24.22 |
| 6598 | 48.99 | 42.89 | 34.41 | 28.14 | 24.19 |

|      |       |       |       |       |       |
|------|-------|-------|-------|-------|-------|
| 6600 | 48.97 | 42.88 | 34.41 | 28.15 | 24.21 |
| 6602 | 48.93 | 42.85 | 34.39 | 28.13 | 24.19 |
| 6604 | 48.91 | 42.85 | 34.41 | 28.15 | 24.23 |
| 6606 | 48.87 | 42.81 | 34.38 | 28.14 | 24.21 |
| 6608 | 48.83 | 42.78 | 34.36 | 28.13 | 24.19 |
| 6610 | 48.83 | 42.78 | 34.36 | 28.14 | 24.19 |
| 6612 | 48.77 | 42.74 | 34.34 | 28.12 | 24.19 |
| 6614 | 48.73 | 42.71 | 34.32 | 28.1  | 24.18 |
| 6616 | 48.7  | 42.69 | 34.31 | 28.09 | 24.18 |
| 6618 | 48.67 | 42.67 | 34.3  | 28.09 | 24.18 |
| 6620 | 48.63 | 42.65 | 34.29 | 28.08 | 24.18 |
| 6622 | 48.6  | 42.63 | 34.27 | 28.08 | 24.18 |
| 6624 | 48.57 | 42.6  | 34.27 | 28.07 | 24.17 |
| 6626 | 48.54 | 42.58 | 34.26 | 28.07 | 24.17 |
| 6628 | 48.51 | 42.56 | 34.25 | 28.07 | 24.17 |
| 6630 | 48.48 | 42.54 | 34.24 | 28.08 | 24.17 |
| 6632 | 48.46 | 42.52 | 34.24 | 28.08 | 24.17 |
| 6634 | 48.43 | 42.5  | 34.22 | 28.07 | 24.17 |
| 6636 | 48.39 | 42.48 | 34.21 | 28.06 | 24.16 |
| 6638 | 48.37 | 42.46 | 34.21 | 28.06 | 24.16 |
| 6640 | 48.34 | 42.44 | 34.19 | 28.07 | 24.16 |
| 6642 | 48.31 | 42.42 | 34.18 | 28.06 | 24.16 |
| 6644 | 48.27 | 42.39 | 34.17 | 28.05 | 24.16 |
| 6646 | 48.23 | 42.37 | 34.16 | 28.04 | 24.15 |
| 6648 | 48.2  | 42.34 | 34.14 | 28.03 | 24.16 |
| 6650 | 48.19 | 42.35 | 34.16 | 28.06 | 24.18 |
| 6652 | 48.16 | 42.33 | 34.15 | 28.05 | 24.18 |
| 6654 | 48.11 | 42.29 | 34.12 | 28.02 | 24.16 |
| 6656 | 48.09 | 42.28 | 34.11 | 28.02 | 24.16 |
| 6658 | 48.1  | 42.3  | 34.15 | 28.06 | 24.21 |
| 6660 | 48.08 | 42.29 | 34.15 | 28.07 | 24.21 |
| 6662 | 48.01 | 42.22 | 34.1  | 28.02 | 24.15 |
| 6664 | 48    | 42.22 | 34.11 | 28.04 | 24.17 |
| 6666 | 47.95 | 42.19 | 34.07 | 28.03 | 24.15 |
| 6668 | 47.91 | 42.15 | 34.05 | 28.01 | 24.14 |
| 6670 | 47.92 | 42.17 | 34.08 | 28.04 | 24.17 |
| 6672 | 47.91 | 42.16 | 34.08 | 28.05 | 24.21 |
| 6674 | 47.87 | 42.14 | 34.08 | 28.06 | 24.18 |
| 6676 | 47.82 | 42.1  | 34.05 | 28.04 | 24.17 |
| 6678 | 47.81 | 42.1  | 34.05 | 28.06 | 24.2  |
| 6680 | 47.77 | 42.06 | 34.03 | 28.04 | 24.18 |
| 6682 | 47.74 | 42.04 | 34.03 | 28.04 | 24.19 |
| 6684 | 47.71 | 42.02 | 34.02 | 28.03 | 24.18 |
| 6686 | 47.69 | 42.01 | 34.02 | 28.04 | 24.19 |

|      |       |       |       |       |       |
|------|-------|-------|-------|-------|-------|
| 6688 | 47.67 | 42    | 34.01 | 28.04 | 24.19 |
| 6690 | 47.62 | 41.95 | 33.97 | 28    | 24.16 |
| 6692 | 47.56 | 41.9  | 33.93 | 27.96 | 24.13 |
| 6694 | 47.52 | 41.88 | 33.92 | 27.97 | 24.14 |
| 6696 | 47.46 | 41.82 | 33.87 | 27.93 | 24.09 |
| 6698 | 47.47 | 41.83 | 33.9  | 27.95 | 24.12 |
| 6700 | 47.45 | 41.81 | 33.89 | 27.95 | 24.12 |
| 6702 | 47.41 | 41.79 | 33.87 | 27.95 | 24.12 |
| 6704 | 47.37 | 41.75 | 33.84 | 27.93 | 24.09 |
| 6706 | 47.34 | 41.74 | 33.84 | 27.94 | 24.11 |
| 6708 | 47.29 | 41.7  | 33.81 | 27.92 | 24.09 |
| 6710 | 47.26 | 41.67 | 33.8  | 27.9  | 24.09 |
| 6712 | 47.24 | 41.65 | 33.78 | 27.87 | 24.07 |
| 6714 | 47.2  | 41.63 | 33.79 | 27.89 | 24.08 |
| 6716 | 47.19 | 41.62 | 33.78 | 27.9  | 24.09 |
| 6718 | 47.16 | 41.61 | 33.77 | 27.89 | 24.09 |
| 6720 | 47.14 | 41.59 | 33.76 | 27.89 | 24.09 |
| 6722 | 47.11 | 41.58 | 33.76 | 27.88 | 24.09 |
| 6724 | 47.08 | 41.56 | 33.75 | 27.88 | 24.09 |
| 6726 | 47.06 | 41.54 | 33.75 | 27.89 | 24.09 |
| 6728 | 47.06 | 41.55 | 33.76 | 27.92 | 24.1  |
| 6730 | 47.01 | 41.51 | 33.73 | 27.89 | 24.1  |
| 6732 | 46.99 | 41.49 | 33.73 | 27.89 | 24.09 |
| 6734 | 46.95 | 41.46 | 33.71 | 27.89 | 24.09 |
| 6736 | 46.96 | 41.48 | 33.73 | 27.91 | 24.12 |
| 6738 | 46.9  | 41.43 | 33.69 | 27.89 | 24.1  |
| 6740 | 46.87 | 41.4  | 33.68 | 27.87 | 24.08 |
| 6742 | 46.81 | 41.37 | 33.65 | 27.85 | 24.06 |
| 6744 | 46.77 | 41.33 | 33.62 | 27.84 | 24.06 |
| 6746 | 46.76 | 41.33 | 33.63 | 27.84 | 24.08 |
| 6748 | 46.72 | 41.31 | 33.61 | 27.82 | 24.07 |
| 6750 | 46.72 | 41.3  | 33.62 | 27.83 | 24.08 |
| 6752 | 46.67 | 41.26 | 33.59 | 27.82 | 24.07 |
| 6754 | 46.65 | 41.25 | 33.6  | 27.82 | 24.07 |
| 6756 | 46.63 | 41.25 | 33.6  | 27.83 | 24.07 |
| 6758 | 46.61 | 41.23 | 33.59 | 27.84 | 24.07 |
| 6760 | 46.58 | 41.21 | 33.59 | 27.84 | 24.07 |
| 6762 | 46.53 | 41.16 | 33.56 | 27.82 | 24.06 |
| 6764 | 46.49 | 41.13 | 33.52 | 27.79 | 24.04 |
| 6766 | 46.46 | 41.11 | 33.53 | 27.81 | 24.05 |
| 6768 | 46.45 | 41.1  | 33.51 | 27.79 | 24.03 |
| 6770 | 46.39 | 41.05 | 33.48 | 27.76 | 24.01 |
| 6772 | 46.39 | 41.07 | 33.5  | 27.8  | 24.05 |
| 6774 | 46.33 | 41.01 | 33.45 | 27.75 | 24    |

|      |       |       |       |       |       |
|------|-------|-------|-------|-------|-------|
| 6776 | 46.34 | 41.03 | 33.48 | 27.78 | 24.04 |
| 6778 | 46.33 | 41.03 | 33.48 | 27.78 | 24.05 |
| 6780 | 46.3  | 41.01 | 33.47 | 27.79 | 24.05 |
| 6782 | 46.27 | 40.99 | 33.47 | 27.78 | 24.05 |
| 6784 | 46.24 | 40.97 | 33.46 | 27.78 | 24.05 |
| 6786 | 46.22 | 40.95 | 33.45 | 27.77 | 24.05 |
| 6788 | 46.19 | 40.93 | 33.44 | 27.77 | 24.05 |
| 6790 | 46.15 | 40.9  | 33.42 | 27.75 | 24.04 |
| 6792 | 46.13 | 40.89 | 33.42 | 27.76 | 24.04 |
| 6794 | 46.1  | 40.88 | 33.41 | 27.75 | 24.04 |
| 6796 | 46.08 | 40.85 | 33.4  | 27.75 | 24.04 |
| 6798 | 46.04 | 40.83 | 33.39 | 27.75 | 24.04 |
| 6800 | 46.03 | 40.82 | 33.38 | 27.75 | 24.04 |
| 6802 | 46    | 40.81 | 33.37 | 27.75 | 24.04 |
| 6804 | 45.97 | 40.78 | 33.37 | 27.75 | 24.04 |
| 6806 | 45.95 | 40.76 | 33.37 | 27.75 | 24.04 |
| 6808 | 45.92 | 40.75 | 33.35 | 27.75 | 24.03 |
| 6810 | 45.91 | 40.74 | 33.35 | 27.75 | 24.04 |
| 6812 | 45.86 | 40.71 | 33.34 | 27.74 | 24.03 |
| 6814 | 45.84 | 40.69 | 33.33 | 27.74 | 24.02 |
| 6816 | 45.79 | 40.65 | 33.29 | 27.71 | 24    |
| 6818 | 45.78 | 40.65 | 33.3  | 27.73 | 24.03 |
| 6820 | 45.77 | 40.65 | 33.3  | 27.73 | 24.02 |
| 6822 | 45.71 | 40.6  | 33.26 | 27.71 | 24.01 |
| 6824 | 45.7  | 40.6  | 33.28 | 27.71 | 24.01 |
| 6826 | 45.65 | 40.55 | 33.24 | 27.69 | 23.98 |
| 6828 | 45.64 | 40.56 | 33.26 | 27.71 | 24.02 |
| 6830 | 45.63 | 40.55 | 33.25 | 27.71 | 24.01 |
| 6832 | 45.59 | 40.53 | 33.24 | 27.7  | 24.01 |
| 6834 | 45.57 | 40.51 | 33.23 | 27.7  | 24.01 |
| 6836 | 45.53 | 40.49 | 33.23 | 27.7  | 24.01 |
| 6838 | 45.51 | 40.46 | 33.22 | 27.7  | 24.01 |
| 6840 | 45.48 | 40.45 | 33.2  | 27.69 | 24.01 |
| 6842 | 45.46 | 40.43 | 33.19 | 27.69 | 24    |
| 6844 | 45.43 | 40.42 | 33.18 | 27.68 | 24.01 |
| 6846 | 45.4  | 40.39 | 33.18 | 27.68 | 24    |
| 6848 | 45.37 | 40.37 | 33.16 | 27.68 | 24    |
| 6850 | 45.35 | 40.35 | 33.15 | 27.67 | 23.99 |
| 6852 | 45.31 | 40.32 | 33.14 | 27.66 | 23.98 |
| 6854 | 45.28 | 40.29 | 33.11 | 27.64 | 23.96 |
| 6856 | 45.27 | 40.3  | 33.13 | 27.67 | 24    |
| 6858 | 45.25 | 40.28 | 33.12 | 27.67 | 24    |
| 6860 | 45.21 | 40.25 | 33.1  | 27.66 | 23.99 |
| 6862 | 45.19 | 40.24 | 33.09 | 27.65 | 23.99 |

|      |       |       |       |       |       |
|------|-------|-------|-------|-------|-------|
| 6864 | 45.16 | 40.22 | 33.08 | 27.63 | 23.98 |
| 6866 | 45.14 | 40.21 | 33.08 | 27.65 | 23.98 |
| 6868 | 45.07 | 40.16 | 33.03 | 27.62 | 23.94 |
| 6870 | 45.06 | 40.15 | 33.04 | 27.63 | 23.97 |
| 6872 | 45.01 | 40.1  | 33    | 27.59 | 23.94 |
| 6874 | 45.01 | 40.11 | 33.02 | 27.6  | 23.95 |
| 6876 | 44.98 | 40.08 | 33    | 27.59 | 23.95 |
| 6878 | 44.97 | 40.09 | 33.01 | 27.61 | 23.98 |
| 6880 | 44.91 | 40.04 | 32.98 | 27.59 | 23.95 |
| 6882 | 44.91 | 40.05 | 32.98 | 27.59 | 23.96 |
| 6884 | 44.87 | 40.01 | 32.96 | 27.57 | 23.96 |
| 6886 | 44.87 | 40.02 | 32.98 | 27.59 | 23.96 |
| 6888 | 44.82 | 39.99 | 32.96 | 27.59 | 23.96 |
| 6890 | 44.81 | 39.98 | 32.95 | 27.59 | 23.94 |
| 6892 | 44.78 | 39.96 | 32.95 | 27.59 | 23.94 |
| 6894 | 44.76 | 39.95 | 32.95 | 27.59 | 23.96 |
| 6896 | 44.72 | 39.91 | 32.92 | 27.57 | 23.94 |
| 6898 | 44.71 | 39.92 | 32.93 | 27.59 | 23.96 |
| 6900 | 44.68 | 39.89 | 32.91 | 27.58 | 23.95 |
| 6902 | 44.64 | 39.86 | 32.87 | 27.54 | 23.92 |
| 6904 | 44.61 | 39.83 | 32.86 | 27.55 | 23.92 |
| 6906 | 44.58 | 39.82 | 32.87 | 27.54 | 23.92 |
| 6908 | 44.52 | 39.77 | 32.82 | 27.51 | 23.9  |
| 6910 | 44.49 | 39.74 | 32.81 | 27.5  | 23.91 |
| 6912 | 44.48 | 39.73 | 32.81 | 27.5  | 23.9  |
| 6914 | 44.48 | 39.76 | 32.83 | 27.53 | 23.92 |
| 6916 | 44.41 | 39.69 | 32.79 | 27.49 | 23.89 |
| 6918 | 44.39 | 39.66 | 32.77 | 27.48 | 23.89 |
| 6920 | 44.4  | 39.68 | 32.79 | 27.5  | 23.92 |
| 6922 | 44.35 | 39.64 | 32.76 | 27.48 | 23.89 |
| 6924 | 44.36 | 39.68 | 32.81 | 27.53 | 23.93 |
| 6926 | 44.3  | 39.61 | 32.75 | 27.49 | 23.88 |
| 6928 | 44.27 | 39.59 | 32.74 | 27.48 | 23.87 |
| 6930 | 44.24 | 39.57 | 32.72 | 27.46 | 23.88 |
| 6932 | 44.19 | 39.54 | 32.7  | 27.45 | 23.87 |
| 6934 | 44.17 | 39.52 | 32.68 | 27.46 | 23.86 |
| 6936 | 44.16 | 39.51 | 32.69 | 27.46 | 23.87 |
| 6938 | 44.14 | 39.51 | 32.69 | 27.49 | 23.89 |
| 6940 | 44.13 | 39.51 | 32.71 | 27.49 | 23.9  |
| 6942 | 44.1  | 39.47 | 32.67 | 27.45 | 23.89 |
| 6944 | 44.06 | 39.44 | 32.66 | 27.44 | 23.86 |
| 6946 | 44.04 | 39.43 | 32.64 | 27.44 | 23.86 |
| 6948 | 44.05 | 39.45 | 32.68 | 27.47 | 23.9  |
| 6950 | 43.99 | 39.4  | 32.65 | 27.44 | 23.87 |

|      |       |       |       |       |       |
|------|-------|-------|-------|-------|-------|
| 6952 | 43.95 | 39.37 | 32.62 | 27.42 | 23.86 |
| 6954 | 43.96 | 39.39 | 32.65 | 27.46 | 23.9  |
| 6956 | 43.91 | 39.36 | 32.62 | 27.42 | 23.86 |
| 6958 | 43.9  | 39.35 | 32.62 | 27.45 | 23.88 |
| 6960 | 43.89 | 39.34 | 32.62 | 27.43 | 23.88 |
| 6962 | 43.83 | 39.3  | 32.6  | 27.42 | 23.87 |
| 6964 | 43.84 | 39.32 | 32.63 | 27.46 | 23.9  |
| 6966 | 43.78 | 39.26 | 32.57 | 27.4  | 23.86 |
| 6968 | 43.76 | 39.25 | 32.57 | 27.4  | 23.86 |
| 6970 | 43.74 | 39.24 | 32.56 | 27.42 | 23.87 |
| 6972 | 43.71 | 39.22 | 32.56 | 27.42 | 23.87 |
| 6974 | 43.71 | 39.22 | 32.56 | 27.42 | 23.87 |
| 6976 | 43.7  | 39.21 | 32.56 | 27.41 | 23.87 |
| 6978 | 43.66 | 39.21 | 32.56 | 27.42 | 23.88 |
| 6980 | 43.61 | 39.15 | 32.52 | 27.38 | 23.85 |
| 6982 | 43.59 | 39.14 | 32.51 | 27.39 | 23.85 |
| 6984 | 43.56 | 39.11 | 32.49 | 27.37 | 23.84 |
| 6986 | 43.53 | 39.09 | 32.49 | 27.37 | 23.84 |
| 6988 | 43.52 | 39.09 | 32.49 | 27.38 | 23.85 |
| 6990 | 43.51 | 39.08 | 32.48 | 27.37 | 23.85 |
| 6992 | 43.49 | 39.07 | 32.48 | 27.38 | 23.84 |
| 6994 | 43.45 | 39.04 | 32.46 | 27.37 | 23.84 |
| 6996 | 43.45 | 39.05 | 32.49 | 27.4  | 23.87 |
| 6998 | 43.39 | 39    | 32.44 | 27.36 | 23.84 |
| 7000 | 43.4  | 39.01 | 32.46 | 27.39 | 23.87 |
| 7002 | 43.35 | 38.96 | 32.42 | 27.35 | 23.83 |
| 7004 | 43.3  | 38.94 | 32.41 | 27.34 | 23.82 |
| 7006 | 43.31 | 38.94 | 32.42 | 27.36 | 23.83 |
| 7008 | 43.28 | 38.92 | 32.4  | 27.35 | 23.82 |
| 7010 | 43.25 | 38.9  | 32.39 | 27.35 | 23.82 |
| 7012 | 43.2  | 38.86 | 32.36 | 27.34 | 23.81 |
| 7014 | 43.19 | 38.85 | 32.36 | 27.34 | 23.81 |
| 7016 | 43.17 | 38.84 | 32.36 | 27.33 | 23.81 |
| 7018 | 43.12 | 38.81 | 32.33 | 27.32 | 23.8  |
| 7020 | 43.1  | 38.79 | 32.33 | 27.32 | 23.79 |
| 7022 | 43.07 | 38.76 | 32.31 | 27.32 | 23.79 |
| 7024 | 43.07 | 38.78 | 32.33 | 27.32 | 23.8  |
| 7026 | 43.04 | 38.75 | 32.31 | 27.3  | 23.79 |
| 7028 | 43.01 | 38.73 | 32.28 | 27.29 | 23.78 |
| 7030 | 42.99 | 38.71 | 32.28 | 27.3  | 23.79 |
| 7032 | 42.96 | 38.69 | 32.28 | 27.29 | 23.79 |
| 7034 | 42.94 | 38.69 | 32.28 | 27.3  | 23.8  |
| 7036 | 42.93 | 38.69 | 32.28 | 27.32 | 23.81 |
| 7038 | 42.9  | 38.65 | 32.26 | 27.3  | 23.79 |



|      |       |       |       |       |       |
|------|-------|-------|-------|-------|-------|
| 7040 | 42.88 | 38.64 | 32.25 | 27.3  | 23.79 |
| 7042 | 42.85 | 38.62 | 32.24 | 27.29 | 23.8  |
| 7044 | 42.83 | 38.61 | 32.24 | 27.29 | 23.79 |
| 7046 | 42.82 | 38.6  | 32.24 | 27.3  | 23.8  |
| 7048 | 42.78 | 38.57 | 32.22 | 27.28 | 23.79 |
| 7050 | 42.74 | 38.54 | 32.2  | 27.26 | 23.77 |
| 7052 | 42.72 | 38.53 | 32.2  | 27.27 | 23.78 |
| 7054 | 42.7  | 38.53 | 32.2  | 27.26 | 23.78 |
| 7056 | 42.69 | 38.51 | 32.2  | 27.26 | 23.79 |
| 7058 | 42.67 | 38.51 | 32.19 | 27.26 | 23.79 |
| 7060 | 42.63 | 38.48 | 32.17 | 27.24 | 23.78 |
| 7062 | 42.59 | 38.44 | 32.14 | 27.22 | 23.78 |
| 7064 | 42.57 | 38.42 | 32.14 | 27.23 | 23.77 |
| 7066 | 42.59 | 38.46 | 32.17 | 27.26 | 23.8  |
| 7068 | 42.53 | 38.4  | 32.13 | 27.23 | 23.77 |
| 7070 | 42.5  | 38.39 | 32.13 | 27.24 | 23.78 |
| 7072 | 42.48 | 38.37 | 32.11 | 27.22 | 23.77 |
| 7074 | 42.46 | 38.36 | 32.11 | 27.24 | 23.79 |
| 7076 | 42.43 | 38.34 | 32.1  | 27.23 | 23.76 |
| 7078 | 42.39 | 38.3  | 32.07 | 27.2  | 23.76 |
| 7080 | 42.4  | 38.32 | 32.09 | 27.23 | 23.77 |
| 7082 | 42.36 | 38.29 | 32.07 | 27.21 | 23.76 |
| 7084 | 42.33 | 38.27 | 32.06 | 27.2  | 23.76 |
| 7086 | 42.31 | 38.26 | 32.07 | 27.22 | 23.78 |
| 7088 | 42.3  | 38.25 | 32.06 | 27.21 | 23.77 |
| 7090 | 42.26 | 38.22 | 32.03 | 27.19 | 23.76 |
| 7092 | 42.26 | 38.23 | 32.06 | 27.22 | 23.79 |
| 7094 | 42.21 | 38.19 | 32.02 | 27.19 | 23.76 |
| 7096 | 42.22 | 38.2  | 32.04 | 27.21 | 23.79 |
| 7098 | 42.2  | 38.19 | 32.04 | 27.22 | 23.78 |
| 7100 | 42.19 | 38.19 | 32.05 | 27.22 | 23.8  |
| 7102 | 42.18 | 38.19 | 32.06 | 27.24 | 23.81 |
| 7104 | 42.15 | 38.16 | 32.04 | 27.23 | 23.79 |
| 7106 | 42.11 | 38.13 | 32.01 | 27.21 | 23.78 |
| 7108 | 42.1  | 38.12 | 32    | 27.21 | 23.78 |
| 7110 | 42.06 | 38.09 | 31.99 | 27.2  | 23.79 |
| 7112 | 42.05 | 38.09 | 32    | 27.21 | 23.79 |
| 7114 | 42.03 | 38.08 | 31.99 | 27.22 | 23.8  |
| 7116 | 41.98 | 38.06 | 31.97 | 27.2  | 23.78 |
| 7118 | 41.94 | 38.01 | 31.94 | 27.17 | 23.74 |
| 7120 | 41.96 | 38.02 | 31.95 | 27.21 | 23.78 |
| 7122 | 41.95 | 38.02 | 31.97 | 27.21 | 23.79 |
| 7124 | 41.92 | 38.01 | 31.96 | 27.22 | 23.8  |
| 7126 | 41.89 | 37.98 | 31.95 | 27.21 | 23.79 |

|      |       |       |       |       |       |
|------|-------|-------|-------|-------|-------|
| 7128 | 41.85 | 37.94 | 31.91 | 27.16 | 23.76 |
| 7130 | 41.82 | 37.92 | 31.89 | 27.15 | 23.74 |
| 7132 | 41.81 | 37.92 | 31.9  | 27.15 | 23.77 |
| 7134 | 41.81 | 37.93 | 31.92 | 27.18 | 23.79 |
| 7136 | 41.78 | 37.91 | 31.89 | 27.17 | 23.78 |
| 7138 | 41.76 | 37.89 | 31.9  | 27.15 | 23.77 |
| 7140 | 41.68 | 37.83 | 31.85 | 27.12 | 23.73 |
| 7142 | 41.66 | 37.81 | 31.83 | 27.12 | 23.73 |
| 7144 | 41.67 | 37.83 | 31.86 | 27.14 | 23.76 |
| 7146 | 41.66 | 37.83 | 31.86 | 27.16 | 23.77 |
| 7148 | 41.65 | 37.83 | 31.86 | 27.16 | 23.78 |
| 7150 | 41.6  | 37.77 | 31.82 | 27.12 | 23.76 |
| 7152 | 41.6  | 37.79 | 31.84 | 27.15 | 23.78 |
| 7154 | 41.59 | 37.78 | 31.85 | 27.16 | 23.79 |
| 7156 | 41.56 | 37.76 | 31.84 | 27.15 | 23.79 |
| 7158 | 41.52 | 37.72 | 31.8  | 27.13 | 23.78 |
| 7160 | 41.46 | 37.68 | 31.76 | 27.09 | 23.73 |
| 7162 | 41.48 | 37.68 | 31.78 | 27.11 | 23.74 |
| 7164 | 41.47 | 37.69 | 31.8  | 27.13 | 23.77 |
| 7166 | 41.44 | 37.67 | 31.78 | 27.13 | 23.77 |
| 7168 | 41.43 | 37.65 | 31.78 | 27.15 | 23.77 |
| 7170 | 41.38 | 37.61 | 31.74 | 27.11 | 23.74 |
| 7172 | 41.35 | 37.6  | 31.73 | 27.1  | 23.73 |
| 7174 | 41.32 | 37.58 | 31.72 | 27.09 | 23.73 |
| 7176 | 41.32 | 37.59 | 31.74 | 27.12 | 23.75 |
| 7178 | 41.33 | 37.61 | 31.76 | 27.13 | 23.77 |
| 7180 | 41.31 | 37.59 | 31.76 | 27.13 | 23.78 |
| 7182 | 41.25 | 37.53 | 31.72 | 27.1  | 23.75 |
| 7184 | 41.26 | 37.55 | 31.74 | 27.13 | 23.76 |
| 7186 | 41.21 | 37.51 | 31.71 | 27.1  | 23.75 |
| 7188 | 41.18 | 37.49 | 31.69 | 27.09 | 23.73 |
| 7190 | 41.15 | 37.48 | 31.68 | 27.08 | 23.73 |
| 7192 | 41.14 | 37.47 | 31.68 | 27.08 | 23.73 |
| 7194 | 41.13 | 37.46 | 31.68 | 27.08 | 23.75 |
| 7196 | 41.09 | 37.42 | 31.65 | 27.07 | 23.73 |
| 7198 | 41.09 | 37.41 | 31.65 | 27.06 | 23.73 |
| 7200 | 41.03 | 37.37 | 31.62 | 27.04 | 23.7  |
| 7202 | 41.02 | 37.38 | 31.63 | 27.06 | 23.72 |
| 7204 | 41.03 | 37.38 | 31.64 | 27.08 | 23.75 |
| 7206 | 41.01 | 37.37 | 31.63 | 27.05 | 23.73 |
| 7208 | 40.96 | 37.34 | 31.61 | 27.05 | 23.72 |
| 7210 | 40.96 | 37.34 | 31.62 | 27.07 | 23.74 |
| 7212 | 40.92 | 37.31 | 31.6  | 27.05 | 23.71 |
| 7214 | 40.92 | 37.31 | 31.6  | 27.06 | 23.72 |

|      |       |       |       |       |       |
|------|-------|-------|-------|-------|-------|
| 7216 | 40.89 | 37.29 | 31.59 | 27.05 | 23.72 |
| 7218 | 40.87 | 37.26 | 31.56 | 27.02 | 23.71 |
| 7220 | 40.81 | 37.22 | 31.53 | 27    | 23.69 |
| 7222 | 40.82 | 37.24 | 31.56 | 27.03 | 23.72 |
| 7224 | 40.82 | 37.24 | 31.57 | 27.04 | 23.72 |
| 7226 | 40.78 | 37.2  | 31.54 | 27.01 | 23.7  |
| 7228 | 40.72 | 37.15 | 31.5  | 26.98 | 23.68 |
| 7230 | 40.7  | 37.14 | 31.49 | 26.97 | 23.68 |
| 7232 | 40.68 | 37.13 | 31.49 | 26.96 | 23.68 |
| 7234 | 40.71 | 37.16 | 31.52 | 27.01 | 23.71 |
| 7236 | 40.68 | 37.13 | 31.5  | 27.01 | 23.71 |
| 7238 | 40.63 | 37.09 | 31.47 | 26.98 | 23.68 |
| 7240 | 40.6  | 37.08 | 31.46 | 26.98 | 23.67 |
| 7242 | 40.62 | 37.09 | 31.49 | 27    | 23.7  |
| 7244 | 40.6  | 37.08 | 31.48 | 27    | 23.7  |
| 7246 | 40.59 | 37.08 | 31.48 | 27.01 | 23.71 |
| 7248 | 40.58 | 37.07 | 31.49 | 27.02 | 23.73 |
| 7250 | 40.56 | 37.06 | 31.49 | 27.02 | 23.72 |
| 7252 | 40.53 | 37.04 | 31.46 | 27.01 | 23.71 |
| 7254 | 40.51 | 37.02 | 31.45 | 27    | 23.7  |
| 7256 | 40.45 | 36.98 | 31.42 | 26.97 | 23.68 |
| 7258 | 40.43 | 36.97 | 31.41 | 26.96 | 23.67 |
| 7260 | 40.42 | 36.97 | 31.42 | 26.98 | 23.7  |
| 7262 | 40.43 | 36.96 | 31.43 | 27    | 23.71 |
| 7264 | 40.41 | 36.96 | 31.43 | 27    | 23.71 |
| 7266 | 40.39 | 36.94 | 31.42 | 27    | 23.71 |
| 7268 | 40.36 | 36.92 | 31.41 | 27    | 23.7  |
| 7270 | 40.32 | 36.89 | 31.37 | 26.96 | 23.66 |
| 7272 | 40.3  | 36.88 | 31.37 | 26.96 | 23.67 |
| 7274 | 40.27 | 36.85 | 31.35 | 26.94 | 23.66 |
| 7276 | 40.23 | 36.82 | 31.33 | 26.91 | 23.65 |
| 7278 | 40.24 | 36.82 | 31.34 | 26.92 | 23.68 |
| 7280 | 40.24 | 36.85 | 31.38 | 26.97 | 23.7  |
| 7282 | 40.19 | 36.8  | 31.33 | 26.94 | 23.66 |
| 7284 | 40.17 | 36.78 | 31.31 | 26.93 | 23.67 |
| 7286 | 40.15 | 36.77 | 31.32 | 26.91 | 23.68 |
| 7288 | 40.1  | 36.74 | 31.29 | 26.89 | 23.65 |
| 7290 | 40.07 | 36.71 | 31.27 | 26.88 | 23.64 |
| 7292 | 40.05 | 36.7  | 31.26 | 26.87 | 23.63 |
| 7294 | 40.08 | 36.72 | 31.3  | 26.91 | 23.67 |
| 7296 | 40.03 | 36.68 | 31.26 | 26.88 | 23.65 |
| 7298 | 39.99 | 36.65 | 31.24 | 26.86 | 23.63 |
| 7300 | 39.98 | 36.66 | 31.25 | 26.87 | 23.64 |
| 7302 | 39.96 | 36.63 | 31.23 | 26.87 | 23.64 |

|      |       |       |       |       |       |
|------|-------|-------|-------|-------|-------|
| 7304 | 39.97 | 36.65 | 31.26 | 26.9  | 23.66 |
| 7306 | 39.96 | 36.66 | 31.27 | 26.92 | 23.68 |
| 7308 | 39.93 | 36.62 | 31.24 | 26.9  | 23.65 |
| 7310 | 39.9  | 36.59 | 31.23 | 26.89 | 23.66 |
| 7312 | 39.9  | 36.6  | 31.24 | 26.91 | 23.67 |
| 7314 | 39.87 | 36.57 | 31.21 | 26.88 | 23.66 |
| 7316 | 39.85 | 36.56 | 31.21 | 26.89 | 23.67 |
| 7318 | 39.81 | 36.53 | 31.19 | 26.87 | 23.65 |
| 7320 | 39.78 | 36.51 | 31.17 | 26.84 | 23.63 |
| 7322 | 39.78 | 36.51 | 31.17 | 26.84 | 23.62 |
| 7324 | 39.75 | 36.49 | 31.17 | 26.84 | 23.62 |
| 7326 | 39.74 | 36.5  | 31.17 | 26.87 | 23.66 |
| 7328 | 39.73 | 36.49 | 31.18 | 26.86 | 23.66 |
| 7330 | 39.72 | 36.48 | 31.17 | 26.87 | 23.67 |
| 7332 | 39.68 | 36.46 | 31.17 | 26.85 | 23.64 |
| 7334 | 39.64 | 36.41 | 31.12 | 26.82 | 23.61 |
| 7336 | 39.61 | 36.39 | 31.11 | 26.82 | 23.6  |
| 7338 | 39.59 | 36.38 | 31.09 | 26.81 | 23.61 |
| 7340 | 39.58 | 36.37 | 31.1  | 26.82 | 23.62 |
| 7342 | 39.55 | 36.35 | 31.08 | 26.8  | 23.61 |
| 7344 | 39.54 | 36.34 | 31.08 | 26.8  | 23.6  |
| 7346 | 39.52 | 36.33 | 31.08 | 26.8  | 23.6  |
| 7348 | 39.48 | 36.29 | 31.06 | 26.8  | 23.59 |
| 7350 | 39.48 | 36.3  | 31.06 | 26.81 | 23.6  |
| 7352 | 39.47 | 36.28 | 31.06 | 26.81 | 23.6  |
| 7354 | 39.44 | 36.26 | 31.04 | 26.79 | 23.59 |
| 7356 | 39.37 | 36.2  | 30.99 | 26.73 | 23.55 |
| 7358 | 39.39 | 36.22 | 31.01 | 26.76 | 23.56 |
| 7360 | 39.35 | 36.2  | 30.98 | 26.75 | 23.55 |
| 7362 | 39.35 | 36.19 | 30.99 | 26.76 | 23.56 |
| 7364 | 39.35 | 36.21 | 31.01 | 26.79 | 23.59 |
| 7366 | 39.33 | 36.19 | 31.01 | 26.79 | 23.59 |
| 7368 | 39.31 | 36.18 | 31    | 26.78 | 23.59 |
| 7370 | 39.3  | 36.16 | 30.99 | 26.77 | 23.59 |
| 7372 | 39.26 | 36.14 | 30.98 | 26.76 | 23.6  |
| 7374 | 39.22 | 36.1  | 30.94 | 26.71 | 23.55 |
| 7376 | 39.23 | 36.12 | 30.97 | 26.76 | 23.6  |
| 7378 | 39.22 | 36.11 | 30.97 | 26.76 | 23.59 |
| 7380 | 39.19 | 36.09 | 30.95 | 26.74 | 23.58 |
| 7382 | 39.18 | 36.08 | 30.94 | 26.74 | 23.58 |
| 7384 | 39.12 | 36.04 | 30.89 | 26.69 | 23.53 |
| 7386 | 39.08 | 35.99 | 30.87 | 26.67 | 23.51 |
| 7388 | 39.09 | 36.02 | 30.9  | 26.7  | 23.55 |
| 7390 | 39.1  | 36.04 | 30.93 | 26.74 | 23.57 |

|      |       |       |       |       |       |
|------|-------|-------|-------|-------|-------|
| 7392 | 39.09 | 36.02 | 30.92 | 26.74 | 23.57 |
| 7394 | 39.07 | 36.01 | 30.91 | 26.74 | 23.57 |
| 7396 | 39.03 | 35.98 | 30.89 | 26.73 | 23.56 |
| 7398 | 39.01 | 35.97 | 30.88 | 26.72 | 23.54 |
| 7400 | 38.99 | 35.95 | 30.88 | 26.71 | 23.54 |
| 7402 | 38.98 | 35.94 | 30.87 | 26.71 | 23.56 |
| 7404 | 38.97 | 35.94 | 30.88 | 26.72 | 23.57 |
| 7406 | 38.96 | 35.93 | 30.87 | 26.72 | 23.56 |
| 7408 | 38.94 | 35.91 | 30.87 | 26.72 | 23.57 |
| 7410 | 38.9  | 35.87 | 30.83 | 26.68 | 23.54 |
| 7412 | 38.87 | 35.86 | 30.83 | 26.68 | 23.55 |
| 7414 | 38.87 | 35.86 | 30.83 | 26.68 | 23.56 |
| 7416 | 38.85 | 35.86 | 30.83 | 26.69 | 23.56 |
| 7418 | 38.84 | 35.85 | 30.82 | 26.69 | 23.56 |
| 7420 | 38.82 | 35.83 | 30.81 | 26.68 | 23.56 |
| 7422 | 38.77 | 35.79 | 30.77 | 26.65 | 23.53 |
| 7424 | 38.78 | 35.8  | 30.79 | 26.67 | 23.55 |
| 7426 | 38.77 | 35.79 | 30.79 | 26.68 | 23.54 |
| 7428 | 38.74 | 35.77 | 30.77 | 26.67 | 23.53 |
| 7430 | 38.71 | 35.76 | 30.77 | 26.67 | 23.54 |
| 7432 | 38.69 | 35.74 | 30.76 | 26.67 | 23.54 |
| 7434 | 38.68 | 35.72 | 30.74 | 26.65 | 23.53 |
| 7436 | 38.67 | 35.73 | 30.76 | 26.67 | 23.54 |
| 7438 | 38.65 | 35.72 | 30.76 | 26.68 | 23.55 |
| 7440 | 38.62 | 35.69 | 30.74 | 26.64 | 23.53 |
| 7442 | 38.62 | 35.69 | 30.74 | 26.66 | 23.54 |
| 7444 | 38.54 | 35.62 | 30.68 | 26.59 | 23.49 |
| 7446 | 38.54 | 35.62 | 30.69 | 26.61 | 23.51 |
| 7448 | 38.55 | 35.62 | 30.7  | 26.61 | 23.51 |
| 7450 | 38.53 | 35.63 | 30.69 | 26.62 | 23.53 |
| 7452 | 38.52 | 35.62 | 30.7  | 26.63 | 23.53 |
| 7454 | 38.49 | 35.59 | 30.68 | 26.61 | 23.52 |
| 7456 | 38.48 | 35.58 | 30.68 | 26.62 | 23.52 |
| 7458 | 38.42 | 35.53 | 30.63 | 26.58 | 23.48 |
| 7460 | 38.4  | 35.52 | 30.63 | 26.58 | 23.47 |
| 7462 | 38.42 | 35.55 | 30.66 | 26.63 | 23.51 |
| 7464 | 38.38 | 35.51 | 30.63 | 26.59 | 23.49 |
| 7466 | 38.39 | 35.52 | 30.65 | 26.6  | 23.51 |
| 7468 | 38.38 | 35.52 | 30.64 | 26.61 | 23.51 |
| 7470 | 38.36 | 35.49 | 30.63 | 26.6  | 23.5  |
| 7472 | 38.35 | 35.5  | 30.65 | 26.62 | 23.52 |
| 7474 | 38.34 | 35.49 | 30.64 | 26.62 | 23.52 |
| 7476 | 38.29 | 35.45 | 30.61 | 26.58 | 23.52 |
| 7478 | 38.27 | 35.42 | 30.59 | 26.56 | 23.48 |

|      |       |       |       |       |       |
|------|-------|-------|-------|-------|-------|
| 7480 | 38.27 | 35.44 | 30.61 | 26.59 | 23.52 |
| 7482 | 38.22 | 35.39 | 30.57 | 26.55 | 23.49 |
| 7484 | 38.22 | 35.4  | 30.59 | 26.57 | 23.51 |
| 7486 | 38.2  | 35.39 | 30.58 | 26.56 | 23.49 |
| 7488 | 38.15 | 35.34 | 30.53 | 26.52 | 23.46 |
| 7490 | 38.15 | 35.36 | 30.54 | 26.54 | 23.48 |
| 7492 | 38.16 | 35.36 | 30.57 | 26.57 | 23.51 |
| 7494 | 38.12 | 35.34 | 30.55 | 26.56 | 23.5  |
| 7496 | 38.11 | 35.34 | 30.55 | 26.56 | 23.5  |
| 7498 | 38.1  | 35.32 | 30.54 | 26.56 | 23.48 |
| 7500 | 38.09 | 35.32 | 30.54 | 26.57 | 23.5  |
| 7502 | 38.07 | 35.31 | 30.54 | 26.57 | 23.51 |
| 7504 | 38.08 | 35.32 | 30.56 | 26.58 | 23.53 |
| 7506 | 38.06 | 35.31 | 30.56 | 26.6  | 23.54 |
| 7508 | 38.07 | 35.31 | 30.58 | 26.61 | 23.56 |
| 7510 | 38.04 | 35.29 | 30.56 | 26.6  | 23.55 |
| 7512 | 38    | 35.27 | 30.53 | 26.57 | 23.53 |
| 7514 | 38    | 35.28 | 30.55 | 26.59 | 23.54 |
| 7516 | 38.01 | 35.28 | 30.56 | 26.6  | 23.56 |
| 7518 | 37.99 | 35.27 | 30.55 | 26.61 | 23.57 |
| 7520 | 37.94 | 35.23 | 30.51 | 26.56 | 23.52 |
| 7522 | 37.95 | 35.24 | 30.53 | 26.59 | 23.56 |
| 7524 | 37.92 | 35.23 | 30.54 | 26.6  | 23.56 |
| 7526 | 37.91 | 35.22 | 30.53 | 26.59 | 23.56 |
| 7528 | 37.9  | 35.21 | 30.52 | 26.59 | 23.56 |
| 7530 | 37.89 | 35.19 | 30.51 | 26.59 | 23.56 |
| 7532 | 37.87 | 35.2  | 30.54 | 26.61 | 23.58 |
| 7534 | 37.85 | 35.18 | 30.51 | 26.59 | 23.57 |
| 7536 | 37.84 | 35.17 | 30.5  | 26.58 | 23.56 |
| 7538 | 37.82 | 35.16 | 30.5  | 26.59 | 23.56 |
| 7540 | 37.76 | 35.1  | 30.46 | 26.55 | 23.52 |
| 7542 | 37.72 | 35.07 | 30.43 | 26.52 | 23.5  |
| 7544 | 37.76 | 35.1  | 30.46 | 26.56 | 23.54 |
| 7546 | 37.74 | 35.1  | 30.46 | 26.57 | 23.53 |
| 7548 | 37.7  | 35.07 | 30.44 | 26.56 | 23.53 |
| 7550 | 37.68 | 35.06 | 30.44 | 26.54 | 23.52 |
| 7552 | 37.65 | 35.03 | 30.41 | 26.52 | 23.5  |
| 7554 | 37.65 | 35.01 | 30.41 | 26.52 | 23.52 |
| 7556 | 37.61 | 34.99 | 30.39 | 26.51 | 23.5  |
| 7558 | 37.6  | 34.98 | 30.39 | 26.5  | 23.5  |
| 7560 | 37.58 | 34.98 | 30.38 | 26.52 | 23.5  |
| 7562 | 37.55 | 34.95 | 30.36 | 26.49 | 23.49 |
| 7564 | 37.53 | 34.94 | 30.35 | 26.49 | 23.48 |
| 7566 | 37.52 | 34.92 | 30.34 | 26.48 | 23.49 |

|      |       |       |       |       |       |
|------|-------|-------|-------|-------|-------|
| 7568 | 37.54 | 34.94 | 30.37 | 26.52 | 23.51 |
| 7570 | 37.49 | 34.91 | 30.33 | 26.49 | 23.47 |
| 7572 | 37.45 | 34.87 | 30.3  | 26.46 | 23.46 |
| 7574 | 37.46 | 34.88 | 30.33 | 26.49 | 23.48 |
| 7576 | 37.44 | 34.87 | 30.32 | 26.49 | 23.48 |
| 7578 | 37.43 | 34.86 | 30.32 | 26.48 | 23.48 |
| 7580 | 37.41 | 34.85 | 30.31 | 26.48 | 23.48 |
| 7582 | 37.38 | 34.83 | 30.3  | 26.47 | 23.45 |
| 7584 | 37.37 | 34.82 | 30.3  | 26.47 | 23.47 |
| 7586 | 37.36 | 34.81 | 30.3  | 26.47 | 23.47 |
| 7588 | 37.34 | 34.8  | 30.29 | 26.46 | 23.47 |
| 7590 | 37.3  | 34.76 | 30.25 | 26.44 | 23.46 |
| 7592 | 37.27 | 34.72 | 30.22 | 26.4  | 23.44 |
| 7594 | 37.29 | 34.75 | 30.26 | 26.43 | 23.47 |
| 7596 | 37.28 | 34.75 | 30.26 | 26.44 | 23.47 |
| 7598 | 37.25 | 34.74 | 30.25 | 26.44 | 23.46 |
| 7600 | 37.22 | 34.7  | 30.22 | 26.42 | 23.46 |
| 7602 | 37.2  | 34.69 | 30.22 | 26.41 | 23.45 |
| 7604 | 37.21 | 34.7  | 30.23 | 26.43 | 23.46 |
| 7606 | 37.18 | 34.68 | 30.21 | 26.42 | 23.45 |
| 7608 | 37.18 | 34.69 | 30.22 | 26.44 | 23.45 |
| 7610 | 37.16 | 34.68 | 30.23 | 26.44 | 23.46 |
| 7612 | 37.15 | 34.67 | 30.22 | 26.44 | 23.46 |
| 7614 | 37.13 | 34.65 | 30.21 | 26.44 | 23.47 |
| 7616 | 37.11 | 34.64 | 30.21 | 26.44 | 23.47 |
| 7618 | 37.1  | 34.63 | 30.2  | 26.43 | 23.47 |
| 7620 | 37.09 | 34.62 | 30.19 | 26.44 | 23.46 |
| 7622 | 37.06 | 34.6  | 30.19 | 26.43 | 23.46 |
| 7624 | 37.02 | 34.56 | 30.15 | 26.39 | 23.43 |
| 7626 | 36.97 | 34.53 | 30.12 | 26.36 | 23.41 |
| 7628 | 36.99 | 34.53 | 30.12 | 26.37 | 23.42 |
| 7630 | 36.96 | 34.52 | 30.12 | 26.36 | 23.41 |
| 7632 | 36.95 | 34.52 | 30.14 | 26.38 | 23.44 |
| 7634 | 36.96 | 34.53 | 30.15 | 26.39 | 23.45 |
| 7636 | 36.94 | 34.51 | 30.12 | 26.38 | 23.44 |
| 7638 | 36.93 | 34.53 | 30.15 | 26.41 | 23.47 |
| 7640 | 36.94 | 34.52 | 30.16 | 26.42 | 23.46 |
| 7642 | 36.91 | 34.51 | 30.15 | 26.41 | 23.45 |
| 7644 | 36.86 | 34.47 | 30.11 | 26.39 | 23.44 |
| 7646 | 36.82 | 34.42 | 30.06 | 26.35 | 23.41 |
| 7648 | 36.84 | 34.43 | 30.08 | 26.37 | 23.42 |
| 7650 | 36.84 | 34.45 | 30.1  | 26.39 | 23.45 |
| 7652 | 36.81 | 34.42 | 30.08 | 26.37 | 23.43 |
| 7654 | 36.79 | 34.41 | 30.07 | 26.36 | 23.43 |

|      |       |       |       |       |       |
|------|-------|-------|-------|-------|-------|
| 7656 | 36.78 | 34.41 | 30.08 | 26.37 | 23.44 |
| 7658 | 36.77 | 34.41 | 30.08 | 26.37 | 23.44 |
| 7660 | 36.72 | 34.34 | 30.04 | 26.33 | 23.41 |
| 7662 | 36.7  | 34.33 | 30.01 | 26.32 | 23.39 |
| 7664 | 36.7  | 34.35 | 30.04 | 26.35 | 23.42 |
| 7666 | 36.7  | 34.34 | 30.04 | 26.35 | 23.42 |
| 7668 | 36.7  | 34.35 | 30.06 | 26.37 | 23.44 |
| 7670 | 36.66 | 34.31 | 30.02 | 26.34 | 23.41 |
| 7672 | 36.64 | 34.29 | 30.02 | 26.33 | 23.4  |
| 7674 | 36.64 | 34.3  | 30.03 | 26.35 | 23.43 |
| 7676 | 36.63 | 34.3  | 30.03 | 26.35 | 23.43 |
| 7678 | 36.6  | 34.27 | 30    | 26.33 | 23.42 |
| 7680 | 36.59 | 34.25 | 29.98 | 26.31 | 23.4  |
| 7682 | 36.57 | 34.26 | 30    | 26.32 | 23.41 |
| 7684 | 36.55 | 34.23 | 29.99 | 26.31 | 23.42 |
| 7686 | 36.55 | 34.24 | 30    | 26.33 | 23.42 |
| 7688 | 36.49 | 34.19 | 29.95 | 26.29 | 23.4  |
| 7690 | 36.46 | 34.16 | 29.92 | 26.26 | 23.36 |
| 7692 | 36.46 | 34.16 | 29.93 | 26.26 | 23.36 |
| 7694 | 36.43 | 34.13 | 29.91 | 26.26 | 23.36 |
| 7696 | 36.41 | 34.1  | 29.88 | 26.23 | 23.33 |
| 7698 | 36.41 | 34.12 | 29.9  | 26.26 | 23.37 |
| 7700 | 36.41 | 34.13 | 29.9  | 26.26 | 23.37 |
| 7702 | 36.38 | 34.1  | 29.9  | 26.24 | 23.36 |
| 7704 | 36.37 | 34.11 | 29.9  | 26.25 | 23.37 |
| 7706 | 36.38 | 34.09 | 29.91 | 26.26 | 23.38 |
| 7708 | 36.34 | 34.07 | 29.89 | 26.25 | 23.37 |
| 7710 | 36.33 | 34.07 | 29.89 | 26.26 | 23.38 |
| 7712 | 36.3  | 34.05 | 29.85 | 26.24 | 23.36 |
| 7714 | 36.28 | 34.03 | 29.85 | 26.23 | 23.36 |
| 7716 | 36.26 | 34.02 | 29.84 | 26.23 | 23.35 |
| 7718 | 36.25 | 34.02 | 29.85 | 26.23 | 23.36 |
| 7720 | 36.24 | 34    | 29.84 | 26.23 | 23.35 |
| 7722 | 36.22 | 33.98 | 29.82 | 26.21 | 23.33 |
| 7724 | 36.21 | 33.98 | 29.82 | 26.22 | 23.35 |
| 7726 | 36.19 | 33.97 | 29.81 | 26.22 | 23.35 |
| 7728 | 36.2  | 33.99 | 29.84 | 26.24 | 23.38 |
| 7730 | 36.19 | 33.97 | 29.83 | 26.23 | 23.38 |
| 7732 | 36.19 | 33.98 | 29.84 | 26.24 | 23.39 |
| 7734 | 36.15 | 33.93 | 29.8  | 26.21 | 23.36 |
| 7736 | 36.09 | 33.89 | 29.77 | 26.19 | 23.34 |
| 7738 | 36.12 | 33.9  | 29.79 | 26.21 | 23.35 |
| 7740 | 36.09 | 33.9  | 29.79 | 26.2  | 23.37 |
| 7742 | 36.08 | 33.89 | 29.78 | 26.2  | 23.35 |



|      |       |       |       |       |       |
|------|-------|-------|-------|-------|-------|
| 7744 | 36.07 | 33.88 | 29.78 | 26.21 | 23.35 |
| 7746 | 36.05 | 33.86 | 29.77 | 26.19 | 23.34 |
| 7748 | 36.04 | 33.85 | 29.76 | 26.19 | 23.34 |
| 7750 | 36.02 | 33.84 | 29.76 | 26.19 | 23.34 |
| 7752 | 36    | 33.83 | 29.75 | 26.19 | 23.34 |
| 7754 | 35.99 | 33.82 | 29.74 | 26.18 | 23.34 |
| 7756 | 35.97 | 33.81 | 29.74 | 26.18 | 23.34 |
| 7758 | 35.93 | 33.76 | 29.71 | 26.15 | 23.31 |
| 7760 | 35.93 | 33.77 | 29.72 | 26.15 | 23.31 |
| 7762 | 35.93 | 33.77 | 29.72 | 26.17 | 23.32 |
| 7764 | 35.9  | 33.74 | 29.7  | 26.17 | 23.31 |
| 7766 | 35.91 | 33.76 | 29.72 | 26.19 | 23.32 |
| 7768 | 35.9  | 33.75 | 29.71 | 26.19 | 23.33 |
| 7770 | 35.89 | 33.75 | 29.71 | 26.19 | 23.35 |
| 7772 | 35.86 | 33.73 | 29.7  | 26.18 | 23.33 |
| 7774 | 35.84 | 33.71 | 29.71 | 26.2  | 23.35 |
| 7776 | 35.84 | 33.71 | 29.69 | 26.18 | 23.33 |
| 7778 | 35.81 | 33.68 | 29.68 | 26.16 | 23.32 |
| 7780 | 35.79 | 33.68 | 29.67 | 26.16 | 23.31 |
| 7782 | 35.79 | 33.68 | 29.67 | 26.17 | 23.33 |
| 7784 | 35.78 | 33.67 | 29.67 | 26.16 | 23.32 |
| 7786 | 35.77 | 33.66 | 29.66 | 26.16 | 23.32 |
| 7788 | 35.72 | 33.61 | 29.63 | 26.13 | 23.29 |
| 7790 | 35.71 | 33.62 | 29.64 | 26.13 | 23.3  |
| 7792 | 35.71 | 33.61 | 29.62 | 26.12 | 23.3  |
| 7794 | 35.7  | 33.6  | 29.63 | 26.13 | 23.32 |
| 7796 | 35.66 | 33.57 | 29.6  | 26.1  | 23.28 |
| 7798 | 35.68 | 33.59 | 29.62 | 26.12 | 23.31 |
| 7800 | 35.66 | 33.56 | 29.6  | 26.11 | 23.3  |
| 7802 | 35.65 | 33.56 | 29.6  | 26.12 | 23.31 |
| 7804 | 35.63 | 33.55 | 29.6  | 26.12 | 23.31 |
| 7806 | 35.62 | 33.53 | 29.59 | 26.12 | 23.31 |
| 7808 | 35.61 | 33.53 | 29.59 | 26.13 | 23.3  |
| 7810 | 35.59 | 33.53 | 29.59 | 26.13 | 23.31 |
| 7812 | 35.58 | 33.52 | 29.59 | 26.13 | 23.3  |
| 7814 | 35.57 | 33.51 | 29.58 | 26.13 | 23.3  |
| 7816 | 35.55 | 33.5  | 29.57 | 26.12 | 23.3  |
| 7818 | 35.52 | 33.46 | 29.54 | 26.08 | 23.28 |
| 7820 | 35.51 | 33.46 | 29.55 | 26.09 | 23.28 |
| 7822 | 35.51 | 33.46 | 29.55 | 26.1  | 23.3  |
| 7824 | 35.49 | 33.45 | 29.54 | 26.09 | 23.28 |
| 7826 | 35.48 | 33.43 | 29.53 | 26.09 | 23.28 |
| 7828 | 35.47 | 33.43 | 29.53 | 26.1  | 23.3  |
| 7830 | 35.46 | 33.42 | 29.53 | 26.09 | 23.29 |

|      |       |       |       |       |       |
|------|-------|-------|-------|-------|-------|
| 7832 | 35.44 | 33.41 | 29.52 | 26.1  | 23.29 |
| 7834 | 35.43 | 33.4  | 29.52 | 26.09 | 23.3  |
| 7836 | 35.38 | 33.37 | 29.48 | 26.06 | 23.26 |
| 7838 | 35.38 | 33.37 | 29.5  | 26.07 | 23.27 |
| 7840 | 35.39 | 33.38 | 29.52 | 26.11 | 23.3  |
| 7842 | 35.36 | 33.37 | 29.49 | 26.09 | 23.29 |
| 7844 | 35.38 | 33.38 | 29.53 | 26.11 | 23.3  |
| 7846 | 35.34 | 33.34 | 29.49 | 26.09 | 23.29 |
| 7848 | 35.3  | 33.32 | 29.47 | 26.06 | 23.27 |
| 7850 | 35.32 | 33.33 | 29.49 | 26.09 | 23.3  |
| 7852 | 35.29 | 33.31 | 29.47 | 26.07 | 23.29 |
| 7854 | 35.26 | 33.29 | 29.45 | 26.05 | 23.28 |
| 7856 | 35.26 | 33.29 | 29.46 | 26.07 | 23.28 |
| 7858 | 35.24 | 33.27 | 29.44 | 26.05 | 23.27 |
| 7860 | 35.21 | 33.25 | 29.42 | 26.04 | 23.27 |
| 7862 | 35.2  | 33.24 | 29.42 | 26.02 | 23.25 |
| 7864 | 35.2  | 33.24 | 29.43 | 26.04 | 23.26 |
| 7866 | 35.19 | 33.23 | 29.43 | 26.06 | 23.27 |
| 7868 | 35.18 | 33.22 | 29.43 | 26.06 | 23.27 |
| 7870 | 35.16 | 33.21 | 29.42 | 26.05 | 23.27 |
| 7872 | 35.15 | 33.2  | 29.42 | 26.03 | 23.27 |
| 7874 | 35.14 | 33.2  | 29.4  | 26.03 | 23.27 |
| 7876 | 35.13 | 33.2  | 29.42 | 26.04 | 23.28 |
| 7878 | 35.11 | 33.18 | 29.4  | 26.02 | 23.26 |
| 7880 | 35.09 | 33.17 | 29.39 | 26.03 | 23.26 |
| 7882 | 35.08 | 33.15 | 29.38 | 26.02 | 23.27 |
| 7884 | 35.06 | 33.14 | 29.37 | 26.01 | 23.27 |
| 7886 | 35.04 | 33.13 | 29.37 | 26.01 | 23.26 |
| 7888 | 35.03 | 33.13 | 29.37 | 26.01 | 23.26 |
| 7890 | 35.02 | 33.12 | 29.36 | 26.01 | 23.26 |
| 7892 | 35.01 | 33.1  | 29.36 | 26.01 | 23.26 |
| 7894 | 34.99 | 33.09 | 29.35 | 26.01 | 23.27 |
| 7896 | 35    | 33.1  | 29.36 | 26.01 | 23.28 |
| 7898 | 34.98 | 33.09 | 29.35 | 26.01 | 23.27 |
| 7900 | 34.99 | 33.09 | 29.36 | 26.02 | 23.28 |
| 7902 | 34.94 | 33.05 | 29.34 | 26    | 23.26 |
| 7904 | 34.92 | 33.04 | 29.33 | 25.99 | 23.26 |
| 7906 | 34.91 | 33.04 | 29.32 | 25.99 | 23.26 |
| 7908 | 34.91 | 33.05 | 29.35 | 26.02 | 23.28 |
| 7910 | 34.88 | 33.02 | 29.31 | 26    | 23.26 |
| 7912 | 34.87 | 33.01 | 29.32 | 26.01 | 23.26 |
| 7914 | 34.87 | 33.01 | 29.32 | 26.01 | 23.26 |
| 7916 | 34.87 | 33.03 | 29.32 | 26.01 | 23.27 |
| 7918 | 34.85 | 33    | 29.31 | 26    | 23.27 |

|      |       |       |       |       |       |
|------|-------|-------|-------|-------|-------|
| 7920 | 34.84 | 32.99 | 29.31 | 26.02 | 23.28 |
| 7922 | 34.82 | 32.98 | 29.3  | 26    | 23.26 |
| 7924 | 34.8  | 32.97 | 29.28 | 25.99 | 23.25 |
| 7926 | 34.8  | 32.96 | 29.29 | 25.99 | 23.27 |
| 7928 | 34.76 | 32.95 | 29.28 | 25.98 | 23.26 |
| 7930 | 34.76 | 32.95 | 29.29 | 25.99 | 23.28 |
| 7932 | 34.73 | 32.9  | 29.24 | 25.94 | 23.23 |
| 7934 | 34.71 | 32.89 | 29.25 | 25.96 | 23.24 |
| 7936 | 34.7  | 32.89 | 29.24 | 25.96 | 23.23 |
| 7938 | 34.7  | 32.89 | 29.24 | 25.96 | 23.24 |
| 7940 | 34.68 | 32.88 | 29.24 | 25.96 | 23.24 |
| 7942 | 34.67 | 32.86 | 29.23 | 25.96 | 23.25 |
| 7944 | 34.66 | 32.86 | 29.23 | 25.95 | 23.24 |
| 7946 | 34.64 | 32.84 | 29.21 | 25.93 | 23.22 |
| 7948 | 34.63 | 32.84 | 29.21 | 25.95 | 23.24 |
| 7950 | 34.61 | 32.82 | 29.2  | 25.95 | 23.23 |
| 7952 | 34.61 | 32.83 | 29.21 | 25.96 | 23.24 |
| 7954 | 34.6  | 32.82 | 29.21 | 25.96 | 23.24 |
| 7956 | 34.59 | 32.81 | 29.2  | 25.96 | 23.24 |
| 7958 | 34.57 | 32.81 | 29.2  | 25.96 | 23.25 |
| 7960 | 34.56 | 32.8  | 29.2  | 25.96 | 23.24 |
| 7962 | 34.55 | 32.78 | 29.2  | 25.95 | 23.23 |
| 7964 | 34.52 | 32.75 | 29.17 | 25.94 | 23.23 |
| 7966 | 34.52 | 32.76 | 29.17 | 25.94 | 23.23 |
| 7968 | 34.52 | 32.77 | 29.18 | 25.95 | 23.24 |
| 7970 | 34.5  | 32.75 | 29.17 | 25.94 | 23.24 |
| 7972 | 34.45 | 32.7  | 29.14 | 25.91 | 23.22 |
| 7974 | 34.46 | 32.72 | 29.15 | 25.92 | 23.23 |
| 7976 | 34.46 | 32.71 | 29.14 | 25.92 | 23.24 |
| 7978 | 34.41 | 32.66 | 29.1  | 25.88 | 23.19 |
| 7980 | 34.38 | 32.63 | 29.08 | 25.86 | 23.17 |
| 7982 | 34.4  | 32.67 | 29.12 | 25.89 | 23.2  |
| 7984 | 34.39 | 32.66 | 29.11 | 25.9  | 23.21 |
| 7986 | 34.39 | 32.68 | 29.13 | 25.92 | 23.23 |
| 7988 | 34.38 | 32.67 | 29.13 | 25.92 | 23.23 |
| 7990 | 34.37 | 32.66 | 29.12 | 25.93 | 23.24 |
| 7992 | 34.34 | 32.64 | 29.11 | 25.91 | 23.23 |
| 7994 | 34.34 | 32.63 | 29.1  | 25.9  | 23.22 |
| 7996 | 34.3  | 32.6  | 29.08 | 25.9  | 23.2  |
| 7998 | 34.27 | 32.57 | 29.05 | 25.86 | 23.17 |
| 8000 | 34.25 | 32.56 | 29.04 | 25.85 | 23.16 |
| 8002 | 34.23 | 32.55 | 29.03 | 25.84 | 23.16 |
| 8004 | 34.22 | 32.53 | 29.02 | 25.83 | 23.16 |
| 8006 | 34.2  | 32.52 | 29.02 | 25.83 | 23.16 |

|      |       |       |       |       |       |
|------|-------|-------|-------|-------|-------|
| 8008 | 34.22 | 32.53 | 29.04 | 25.85 | 23.18 |
| 8010 | 34.19 | 32.52 | 29.02 | 25.84 | 23.18 |
| 8012 | 34.2  | 32.53 | 29.04 | 25.86 | 23.2  |
| 8014 | 34.16 | 32.49 | 29    | 25.83 | 23.17 |
| 8016 | 34.15 | 32.5  | 29.02 | 25.85 | 23.18 |
| 8018 | 34.16 | 32.51 | 29.03 | 25.87 | 23.18 |
| 8020 | 34.13 | 32.47 | 28.99 | 25.84 | 23.16 |
| 8022 | 34.11 | 32.46 | 28.98 | 25.83 | 23.15 |
| 8024 | 34.09 | 32.44 | 28.97 | 25.82 | 23.16 |
| 8026 | 34.09 | 32.44 | 28.97 | 25.83 | 23.16 |
| 8028 | 34.08 | 32.43 | 28.97 | 25.82 | 23.16 |
| 8030 | 34.06 | 32.43 | 28.97 | 25.82 | 23.15 |
| 8032 | 34.05 | 32.42 | 28.98 | 25.83 | 23.18 |
| 8034 | 34.07 | 32.44 | 28.99 | 25.85 | 23.2  |
| 8036 | 34.06 | 32.44 | 29.01 | 25.85 | 23.21 |
| 8038 | 34.05 | 32.43 | 28.99 | 25.85 | 23.2  |
| 8040 | 34    | 32.38 | 28.95 | 25.8  | 23.17 |
| 8042 | 34.01 | 32.38 | 28.96 | 25.81 | 23.18 |
| 8044 | 34    | 32.38 | 28.95 | 25.81 | 23.18 |
| 8046 | 34    | 32.39 | 28.97 | 25.83 | 23.2  |
| 8048 | 34    | 32.39 | 28.98 | 25.85 | 23.21 |
| 8050 | 33.98 | 32.37 | 28.95 | 25.83 | 23.19 |
| 8052 | 33.95 | 32.34 | 28.93 | 25.81 | 23.17 |
| 8054 | 33.94 | 32.34 | 28.92 | 25.81 | 23.17 |
| 8056 | 33.9  | 32.3  | 28.91 | 25.79 | 23.15 |
| 8058 | 33.88 | 32.29 | 28.89 | 25.79 | 23.14 |
| 8060 | 33.88 | 32.3  | 28.9  | 25.8  | 23.16 |
| 8062 | 33.87 | 32.29 | 28.9  | 25.8  | 23.16 |
| 8064 | 33.88 | 32.31 | 28.92 | 25.82 | 23.18 |
| 8066 | 33.88 | 32.31 | 28.91 | 25.83 | 23.17 |
| 8068 | 33.88 | 32.31 | 28.93 | 25.84 | 23.19 |
| 8070 | 33.86 | 32.3  | 28.93 | 25.84 | 23.19 |
| 8072 | 33.85 | 32.29 | 28.92 | 25.82 | 23.19 |
| 8074 | 33.83 | 32.28 | 28.91 | 25.82 | 23.19 |
| 8076 | 33.82 | 32.27 | 28.91 | 25.81 | 23.2  |
| 8078 | 33.81 | 32.27 | 28.91 | 25.82 | 23.21 |
| 8080 | 33.77 | 32.23 | 28.88 | 25.79 | 23.18 |
| 8082 | 33.73 | 32.19 | 28.84 | 25.76 | 23.15 |
| 8084 | 33.73 | 32.2  | 28.85 | 25.77 | 23.16 |
| 8086 | 33.72 | 32.19 | 28.85 | 25.76 | 23.14 |
| 8088 | 33.7  | 32.17 | 28.82 | 25.74 | 23.14 |
| 8090 | 33.68 | 32.14 | 28.82 | 25.73 | 23.13 |
| 8092 | 33.66 | 32.14 | 28.81 | 25.72 | 23.12 |
| 8094 | 33.66 | 32.14 | 28.81 | 25.74 | 23.12 |

|      |       |       |       |       |       |
|------|-------|-------|-------|-------|-------|
| 8096 | 33.65 | 32.13 | 28.81 | 25.74 | 23.12 |
| 8098 | 33.66 | 32.15 | 28.84 | 25.79 | 23.16 |
| 8100 | 33.66 | 32.15 | 28.85 | 25.78 | 23.17 |
| 8102 | 33.66 | 32.15 | 28.84 | 25.78 | 23.17 |
| 8104 | 33.63 | 32.13 | 28.82 | 25.78 | 23.16 |
| 8106 | 33.61 | 32.12 | 28.81 | 25.76 | 23.15 |
| 8108 | 33.59 | 32.11 | 28.8  | 25.75 | 23.14 |
| 8110 | 33.6  | 32.1  | 28.79 | 25.75 | 23.16 |
| 8112 | 33.6  | 32.11 | 28.82 | 25.76 | 23.17 |
| 8114 | 33.59 | 32.11 | 28.82 | 25.77 | 23.18 |
| 8116 | 33.58 | 32.1  | 28.81 | 25.77 | 23.18 |
| 8118 | 33.57 | 32.09 | 28.81 | 25.77 | 23.17 |
| 8120 | 33.54 | 32.07 | 28.78 | 25.74 | 23.16 |
| 8122 | 33.51 | 32.06 | 28.79 | 25.75 | 23.15 |
| 8124 | 33.52 | 32.06 | 28.81 | 25.76 | 23.16 |
| 8126 | 33.49 | 32.04 | 28.78 | 25.74 | 23.14 |
| 8128 | 33.5  | 32.05 | 28.79 | 25.77 | 23.17 |
| 8130 | 33.48 | 32.03 | 28.77 | 25.74 | 23.14 |
| 8132 | 33.45 | 32    | 28.77 | 25.75 | 23.15 |
| 8134 | 33.43 | 32    | 28.75 | 25.73 | 23.14 |
| 8136 | 33.41 | 31.98 | 28.74 | 25.73 | 23.13 |
| 8138 | 33.45 | 32.01 | 28.77 | 25.77 | 23.17 |
| 8140 | 33.39 | 31.97 | 28.72 | 25.72 | 23.14 |
| 8142 | 33.41 | 31.99 | 28.75 | 25.74 | 23.16 |
| 8144 | 33.36 | 31.93 | 28.71 | 25.69 | 23.12 |
| 8146 | 33.35 | 31.93 | 28.71 | 25.7  | 23.13 |
| 8148 | 33.36 | 31.95 | 28.72 | 25.72 | 23.14 |
| 8150 | 33.33 | 31.92 | 28.7  | 25.69 | 23.11 |
| 8152 | 33.3  | 31.9  | 28.68 | 25.68 | 23.12 |
| 8154 | 33.33 | 31.93 | 28.72 | 25.72 | 23.13 |
| 8156 | 33.29 | 31.9  | 28.69 | 25.7  | 23.12 |
| 8158 | 33.28 | 31.89 | 28.7  | 25.69 | 23.12 |
| 8160 | 33.27 | 31.87 | 28.68 | 25.68 | 23.12 |
| 8162 | 33.27 | 31.88 | 28.67 | 25.68 | 23.11 |
| 8164 | 33.23 | 31.86 | 28.66 | 25.67 | 23.11 |
| 8166 | 33.23 | 31.86 | 28.66 | 25.68 | 23.1  |
| 8168 | 33.26 | 31.88 | 28.7  | 25.72 | 23.15 |
| 8170 | 33.22 | 31.85 | 28.67 | 25.69 | 23.11 |
| 8172 | 33.19 | 31.82 | 28.64 | 25.66 | 23.11 |
| 8174 | 33.18 | 31.82 | 28.63 | 25.66 | 23.1  |
| 8176 | 33.19 | 31.82 | 28.65 | 25.67 | 23.13 |
| 8178 | 33.18 | 31.81 | 28.64 | 25.67 | 23.12 |
| 8180 | 33.19 | 31.83 | 28.66 | 25.69 | 23.14 |
| 8182 | 33.18 | 31.83 | 28.67 | 25.7  | 23.16 |

|      |       |       |       |       |       |
|------|-------|-------|-------|-------|-------|
| 8184 | 33.16 | 31.8  | 28.64 | 25.67 | 23.13 |
| 8186 | 33.17 | 31.81 | 28.66 | 25.69 | 23.14 |
| 8188 | 33.16 | 31.82 | 28.67 | 25.71 | 23.15 |
| 8190 | 33.14 | 31.78 | 28.64 | 25.68 | 23.12 |
| 8192 | 33.12 | 31.78 | 28.65 | 25.7  | 23.15 |
| 8194 | 33.13 | 31.79 | 28.65 | 25.71 | 23.15 |
| 8196 | 33.09 | 31.77 | 28.64 | 25.69 | 23.13 |
| 8198 | 33.06 | 31.74 | 28.61 | 25.67 | 23.11 |
| 8200 | 33.07 | 31.73 | 28.6  | 25.68 | 23.12 |
| 8202 | 33.04 | 31.73 | 28.61 | 25.67 | 23.11 |
| 8204 | 33.02 | 31.71 | 28.59 | 25.65 | 23.11 |
| 8206 | 32.99 | 31.68 | 28.56 | 25.61 | 23.08 |
| 8208 | 32.97 | 31.66 | 28.56 | 25.61 | 23.08 |
| 8210 | 32.97 | 31.66 | 28.55 | 25.61 | 23.08 |
| 8212 | 32.98 | 31.68 | 28.57 | 25.64 | 23.11 |
| 8214 | 32.96 | 31.67 | 28.56 | 25.64 | 23.11 |
| 8216 | 32.94 | 31.64 | 28.55 | 25.61 | 23.08 |
| 8218 | 32.94 | 31.64 | 28.55 | 25.62 | 23.09 |
| 8220 | 32.91 | 31.61 | 28.53 | 25.6  | 23.08 |
| 8222 | 32.94 | 31.66 | 28.58 | 25.64 | 23.11 |
| 8224 | 32.92 | 31.63 | 28.55 | 25.63 | 23.09 |
| 8226 | 32.86 | 31.58 | 28.53 | 25.61 | 23.07 |
| 8228 | 32.91 | 31.63 | 28.56 | 25.64 | 23.1  |
| 8230 | 32.88 | 31.61 | 28.55 | 25.64 | 23.1  |
| 8232 | 32.88 | 31.62 | 28.54 | 25.64 | 23.1  |
| 8234 | 32.84 | 31.59 | 28.52 | 25.62 | 23.09 |
| 8236 | 32.85 | 31.59 | 28.51 | 25.61 | 23.08 |
| 8238 | 32.85 | 31.6  | 28.54 | 25.64 | 23.11 |
| 8240 | 32.85 | 31.61 | 28.55 | 25.65 | 23.12 |
| 8242 | 32.85 | 31.6  | 28.54 | 25.65 | 23.13 |
| 8244 | 32.8  | 31.55 | 28.5  | 25.61 | 23.1  |
| 8246 | 32.79 | 31.55 | 28.51 | 25.62 | 23.12 |
| 8248 | 32.77 | 31.53 | 28.5  | 25.61 | 23.11 |
| 8250 | 32.73 | 31.49 | 28.46 | 25.57 | 23.07 |
| 8252 | 32.76 | 31.52 | 28.5  | 25.61 | 23.11 |
| 8254 | 32.75 | 31.52 | 28.49 | 25.61 | 23.11 |
| 8256 | 32.76 | 31.54 | 28.51 | 25.62 | 23.12 |
| 8258 | 32.76 | 31.54 | 28.51 | 25.62 | 23.14 |
| 8260 | 32.74 | 31.53 | 28.5  | 25.62 | 23.12 |
| 8262 | 32.73 | 31.52 | 28.5  | 25.62 | 23.12 |
| 8264 | 32.71 | 31.51 | 28.5  | 25.61 | 23.12 |
| 8266 | 32.7  | 31.49 | 28.48 | 25.6  | 23.11 |
| 8268 | 32.66 | 31.46 | 28.45 | 25.57 | 23.08 |
| 8270 | 32.66 | 31.47 | 28.47 | 25.59 | 23.11 |

|      |       |       |       |       |       |
|------|-------|-------|-------|-------|-------|
| 8272 | 32.67 | 31.48 | 28.47 | 25.6  | 23.11 |
| 8274 | 32.67 | 31.47 | 28.47 | 25.6  | 23.11 |
| 8276 | 32.65 | 31.46 | 28.47 | 25.61 | 23.12 |
| 8278 | 32.64 | 31.46 | 28.47 | 25.61 | 23.12 |
| 8280 | 32.64 | 31.45 | 28.47 | 25.61 | 23.11 |
| 8282 | 32.62 | 31.44 | 28.47 | 25.6  | 23.12 |
| 8284 | 32.61 | 31.44 | 28.46 | 25.61 | 23.12 |
| 8286 | 32.61 | 31.43 | 28.46 | 25.61 | 23.13 |
| 8288 | 32.57 | 31.41 | 28.44 | 25.59 | 23.11 |
| 8290 | 32.58 | 31.41 | 28.45 | 25.59 | 23.11 |
| 8292 | 32.57 | 31.4  | 28.44 | 25.58 | 23.11 |
| 8294 | 32.55 | 31.39 | 28.43 | 25.58 | 23.12 |
| 8296 | 32.54 | 31.39 | 28.43 | 25.58 | 23.11 |
| 8298 | 32.51 | 31.35 | 28.41 | 25.57 | 23.1  |
| 8300 | 32.52 | 31.37 | 28.42 | 25.57 | 23.11 |
| 8302 | 32.49 | 31.35 | 28.4  | 25.57 | 23.1  |
| 8304 | 32.5  | 31.35 | 28.42 | 25.58 | 23.11 |
| 8306 | 32.48 | 31.34 | 28.4  | 25.57 | 23.11 |
| 8308 | 32.45 | 31.3  | 28.37 | 25.53 | 23.07 |
| 8310 | 32.47 | 31.32 | 28.39 | 25.56 | 23.1  |
| 8312 | 32.44 | 31.3  | 28.37 | 25.55 | 23.1  |
| 8314 | 32.44 | 31.31 | 28.39 | 25.57 | 23.1  |
| 8316 | 32.43 | 31.31 | 28.38 | 25.55 | 23.09 |
| 8318 | 32.42 | 31.29 | 28.38 | 25.56 | 23.09 |
| 8320 | 32.4  | 31.29 | 28.37 | 25.55 | 23.09 |
| 8322 | 32.39 | 31.27 | 28.36 | 25.55 | 23.07 |
| 8324 | 32.38 | 31.26 | 28.35 | 25.55 | 23.07 |
| 8326 | 32.36 | 31.25 | 28.35 | 25.55 | 23.08 |
| 8328 | 32.33 | 31.22 | 28.32 | 25.52 | 23.05 |
| 8330 | 32.37 | 31.26 | 28.34 | 25.55 | 23.09 |
| 8332 | 32.34 | 31.24 | 28.34 | 25.54 | 23.07 |
| 8334 | 32.32 | 31.23 | 28.34 | 25.55 | 23.06 |
| 8336 | 32.31 | 31.2  | 28.31 | 25.53 | 23.06 |
| 8338 | 32.27 | 31.17 | 28.29 | 25.5  | 23.04 |
| 8340 | 32.26 | 31.18 | 28.3  | 25.5  | 23.06 |
| 8342 | 32.28 | 31.2  | 28.32 | 25.52 | 23.07 |
| 8344 | 32.25 | 31.17 | 28.3  | 25.5  | 23.06 |
| 8346 | 32.23 | 31.14 | 28.27 | 25.48 | 23.04 |
| 8348 | 32.24 | 31.15 | 28.29 | 25.5  | 23.05 |
| 8350 | 32.24 | 31.17 | 28.31 | 25.52 | 23.08 |
| 8352 | 32.2  | 31.12 | 28.27 | 25.48 | 23.04 |
| 8354 | 32.19 | 31.12 | 28.26 | 25.48 | 23.03 |
| 8356 | 32.21 | 31.13 | 28.28 | 25.5  | 23.05 |
| 8358 | 32.2  | 31.14 | 28.3  | 25.52 | 23.06 |

|      |       |       |       |       |       |
|------|-------|-------|-------|-------|-------|
| 8360 | 32.17 | 31.1  | 28.26 | 25.49 | 23.04 |
| 8362 | 32.18 | 31.12 | 28.27 | 25.5  | 23.07 |
| 8364 | 32.17 | 31.12 | 28.27 | 25.51 | 23.07 |
| 8366 | 32.17 | 31.12 | 28.28 | 25.52 | 23.07 |
| 8368 | 32.18 | 31.13 | 28.3  | 25.54 | 23.09 |
| 8370 | 32.14 | 31.1  | 28.26 | 25.51 | 23.06 |
| 8372 | 32.1  | 31.06 | 28.23 | 25.49 | 23.03 |
| 8374 | 32.11 | 31.07 | 28.25 | 25.5  | 23.06 |
| 8376 | 32.09 | 31.05 | 28.23 | 25.48 | 23.04 |
| 8378 | 32.1  | 31.06 | 28.24 | 25.5  | 23.05 |
| 8380 | 32.08 | 31.05 | 28.24 | 25.5  | 23.06 |
| 8382 | 32.05 | 31.02 | 28.21 | 25.48 | 23.03 |
| 8384 | 32.04 | 31.02 | 28.21 | 25.47 | 23.03 |
| 8386 | 32.02 | 31    | 28.19 | 25.45 | 23.01 |
| 8388 | 32.03 | 31    | 28.2  | 25.46 | 23.03 |
| 8390 | 32.01 | 31.01 | 28.21 | 25.46 | 23.04 |
| 8392 | 32.02 | 31.01 | 28.21 | 25.47 | 23.05 |
| 8394 | 32.01 | 31    | 28.21 | 25.48 | 23.05 |
| 8396 | 32.01 | 31.01 | 28.23 | 25.5  | 23.06 |
| 8398 | 31.98 | 30.97 | 28.19 | 25.45 | 23.02 |
| 8400 | 31.96 | 30.96 | 28.18 | 25.44 | 23.02 |
| 8402 | 31.95 | 30.95 | 28.17 | 25.43 | 23.02 |
| 8404 | 31.93 | 30.94 | 28.16 | 25.43 | 23.02 |
| 8406 | 31.93 | 30.92 | 28.16 | 25.43 | 23.02 |
| 8408 | 31.92 | 30.92 | 28.16 | 25.43 | 23.02 |
| 8410 | 31.91 | 30.92 | 28.15 | 25.43 | 23.02 |
| 8412 | 31.87 | 30.88 | 28.12 | 25.41 | 23    |
| 8414 | 31.88 | 30.89 | 28.13 | 25.41 | 23.01 |
| 8416 | 31.88 | 30.89 | 28.14 | 25.41 | 23.01 |
| 8418 | 31.87 | 30.88 | 28.14 | 25.42 | 23.01 |
| 8420 | 31.86 | 30.89 | 28.13 | 25.43 | 23.01 |
| 8422 | 31.85 | 30.88 | 28.13 | 25.43 | 23.01 |
| 8424 | 31.83 | 30.85 | 28.12 | 25.42 | 23.01 |
| 8426 | 31.81 | 30.86 | 28.12 | 25.42 | 22.99 |
| 8428 | 31.82 | 30.86 | 28.12 | 25.42 | 23    |
| 8430 | 31.84 | 30.88 | 28.14 | 25.45 | 23.04 |
| 8432 | 31.82 | 30.86 | 28.13 | 25.43 | 23.03 |
| 8434 | 31.8  | 30.84 | 28.11 | 25.42 | 23.01 |
| 8436 | 31.8  | 30.85 | 28.12 | 25.43 | 23.02 |
| 8438 | 31.81 | 30.85 | 28.13 | 25.44 | 23.03 |
| 8440 | 31.79 | 30.82 | 28.11 | 25.42 | 23.01 |
| 8442 | 31.76 | 30.81 | 28.1  | 25.41 | 23    |
| 8444 | 31.76 | 30.8  | 28.09 | 25.41 | 23    |
| 8446 | 31.74 | 30.79 | 28.09 | 25.41 | 23.01 |



|      |       |       |       |       |       |
|------|-------|-------|-------|-------|-------|
| 8448 | 31.74 | 30.79 | 28.08 | 25.41 | 23.01 |
| 8450 | 31.74 | 30.8  | 28.09 | 25.41 | 23.01 |
| 8452 | 31.71 | 30.77 | 28.08 | 25.41 | 23    |
| 8454 | 31.71 | 30.77 | 28.08 | 25.4  | 23    |
| 8456 | 31.69 | 30.75 | 28.07 | 25.39 | 22.99 |
| 8458 | 31.69 | 30.76 | 28.07 | 25.39 | 23    |
| 8460 | 31.67 | 30.74 | 28.05 | 25.38 | 22.98 |
| 8462 | 31.67 | 30.75 | 28.05 | 25.39 | 23    |
| 8464 | 31.65 | 30.72 | 28.05 | 25.37 | 22.98 |
| 8466 | 31.66 | 30.75 | 28.06 | 25.4  | 23.01 |
| 8468 | 31.65 | 30.74 | 28.06 | 25.39 | 23    |
| 8470 | 31.65 | 30.74 | 28.07 | 25.39 | 23    |
| 8472 | 31.62 | 30.71 | 28.04 | 25.39 | 22.99 |
| 8474 | 31.6  | 30.69 | 28.03 | 25.36 | 22.97 |
| 8476 | 31.59 | 30.69 | 28.03 | 25.36 | 22.99 |
| 8478 | 31.56 | 30.65 | 27.99 | 25.33 | 22.95 |
| 8480 | 31.58 | 30.67 | 28.02 | 25.35 | 22.98 |
| 8482 | 31.57 | 30.67 | 28.02 | 25.36 | 22.98 |
| 8484 | 31.56 | 30.67 | 28.01 | 25.36 | 22.99 |
| 8486 | 31.55 | 30.66 | 28    | 25.35 | 22.99 |
| 8488 | 31.53 | 30.63 | 27.99 | 25.33 | 22.97 |
| 8490 | 31.53 | 30.64 | 28.01 | 25.35 | 22.98 |
| 8492 | 31.53 | 30.64 | 28.01 | 25.36 | 22.99 |
| 8494 | 31.53 | 30.65 | 28.01 | 25.37 | 23    |
| 8496 | 31.51 | 30.63 | 28    | 25.36 | 23    |
| 8498 | 31.55 | 30.67 | 28.05 | 25.41 | 23.04 |
| 8500 | 31.54 | 30.67 | 28.04 | 25.41 | 23.04 |
| 8502 | 31.53 | 30.67 | 28.03 | 25.4  | 23.03 |
| 8504 | 31.51 | 30.65 | 28.03 | 25.4  | 23.03 |
| 8506 | 31.48 | 30.62 | 28    | 25.37 | 23    |
| 8508 | 31.48 | 30.62 | 28.01 | 25.39 | 23.03 |
| 8510 | 31.48 | 30.62 | 28    | 25.37 | 23.04 |
| 8512 | 31.45 | 30.61 | 27.98 | 25.37 | 23.02 |
| 8514 | 31.43 | 30.59 | 27.99 | 25.35 | 23.01 |
| 8516 | 31.44 | 30.59 | 27.99 | 25.35 | 23.02 |
| 8518 | 31.43 | 30.58 | 27.98 | 25.36 | 23.01 |
| 8520 | 31.42 | 30.57 | 27.97 | 25.35 | 23.01 |
| 8522 | 31.4  | 30.56 | 27.97 | 25.34 | 23    |
| 8524 | 31.41 | 30.57 | 27.98 | 25.36 | 23.01 |
| 8526 | 31.37 | 30.55 | 27.95 | 25.35 | 22.99 |
| 8528 | 31.37 | 30.55 | 27.95 | 25.35 | 23    |
| 8530 | 31.35 | 30.51 | 27.94 | 25.34 | 22.98 |
| 8532 | 31.33 | 30.5  | 27.92 | 25.33 | 22.97 |
| 8534 | 31.31 | 30.49 | 27.91 | 25.31 | 22.96 |

|      |       |       |       |       |       |
|------|-------|-------|-------|-------|-------|
| 8536 | 31.33 | 30.51 | 27.93 | 25.34 | 22.98 |
| 8538 | 31.32 | 30.49 | 27.92 | 25.34 | 22.97 |
| 8540 | 31.32 | 30.5  | 27.93 | 25.34 | 22.99 |
| 8542 | 31.32 | 30.5  | 27.94 | 25.33 | 23    |
| 8544 | 31.31 | 30.5  | 27.95 | 25.33 | 23.01 |
| 8546 | 31.29 | 30.49 | 27.94 | 25.33 | 23    |
| 8548 | 31.28 | 30.48 | 27.92 | 25.33 | 23.01 |
| 8550 | 31.3  | 30.5  | 27.94 | 25.34 | 23.02 |
| 8552 | 31.3  | 30.5  | 27.95 | 25.34 | 23.02 |
| 8554 | 31.25 | 30.45 | 27.9  | 25.31 | 22.98 |
| 8556 | 31.25 | 30.45 | 27.91 | 25.32 | 22.99 |
| 8558 | 31.22 | 30.43 | 27.89 | 25.31 | 22.96 |
| 8560 | 31.22 | 30.43 | 27.89 | 25.31 | 22.97 |
| 8562 | 31.21 | 30.41 | 27.88 | 25.31 | 22.97 |
| 8564 | 31.21 | 30.41 | 27.89 | 25.31 | 22.98 |
| 8566 | 31.24 | 30.46 | 27.93 | 25.35 | 23.03 |
| 8568 | 31.19 | 30.41 | 27.88 | 25.31 | 22.98 |
| 8570 | 31.18 | 30.4  | 27.88 | 25.32 | 22.99 |
| 8572 | 31.16 | 30.38 | 27.86 | 25.29 | 22.97 |
| 8574 | 31.14 | 30.37 | 27.85 | 25.28 | 22.97 |
| 8576 | 31.16 | 30.39 | 27.88 | 25.31 | 23    |
| 8578 | 31.18 | 30.41 | 27.9  | 25.33 | 23.02 |
| 8580 | 31.16 | 30.4  | 27.89 | 25.31 | 23.01 |
| 8582 | 31.14 | 30.39 | 27.87 | 25.3  | 23    |
| 8584 | 31.12 | 30.37 | 27.86 | 25.29 | 22.98 |
| 8586 | 31.1  | 30.35 | 27.86 | 25.29 | 22.98 |
| 8588 | 31.08 | 30.34 | 27.84 | 25.27 | 22.96 |
| 8590 | 31.08 | 30.33 | 27.84 | 25.28 | 22.96 |
| 8592 | 31.08 | 30.33 | 27.84 | 25.29 | 22.97 |
| 8594 | 31.06 | 30.32 | 27.82 | 25.28 | 22.96 |
| 8596 | 31.06 | 30.32 | 27.82 | 25.28 | 22.96 |
| 8598 | 31.06 | 30.31 | 27.83 | 25.29 | 22.97 |
| 8600 | 31.06 | 30.32 | 27.84 | 25.3  | 22.98 |
| 8602 | 31.04 | 30.3  | 27.83 | 25.3  | 22.99 |
| 8604 | 31.02 | 30.29 | 27.82 | 25.28 | 22.97 |
| 8606 | 31.04 | 30.31 | 27.84 | 25.28 | 22.99 |
| 8608 | 31.01 | 30.28 | 27.81 | 25.27 | 22.97 |
| 8610 | 31.03 | 30.31 | 27.85 | 25.31 | 23.01 |
| 8612 | 30.97 | 30.26 | 27.79 | 25.25 | 22.96 |
| 8614 | 30.99 | 30.28 | 27.8  | 25.26 | 22.98 |
| 8616 | 30.98 | 30.27 | 27.81 | 25.27 | 23    |
| 8618 | 30.99 | 30.28 | 27.83 | 25.3  | 23    |
| 8620 | 30.98 | 30.27 | 27.81 | 25.28 | 22.99 |
| 8622 | 30.99 | 30.28 | 27.84 | 25.31 | 23.01 |

|      |       |       |       |       |       |
|------|-------|-------|-------|-------|-------|
| 8624 | 30.95 | 30.26 | 27.81 | 25.29 | 23.01 |
| 8626 | 30.92 | 30.21 | 27.77 | 25.25 | 22.96 |
| 8628 | 30.94 | 30.25 | 27.8  | 25.28 | 22.98 |
| 8630 | 30.93 | 30.23 | 27.8  | 25.29 | 23    |
| 8632 | 30.89 | 30.19 | 27.76 | 25.24 | 22.95 |
| 8634 | 30.92 | 30.23 | 27.79 | 25.26 | 22.98 |
| 8636 | 30.9  | 30.23 | 27.79 | 25.27 | 22.99 |
| 8638 | 30.9  | 30.22 | 27.8  | 25.28 | 23    |
| 8640 | 30.87 | 30.2  | 27.77 | 25.26 | 22.99 |
| 8642 | 30.86 | 30.17 | 27.75 | 25.24 | 22.97 |
| 8644 | 30.85 | 30.16 | 27.76 | 25.24 | 22.98 |
| 8646 | 30.83 | 30.16 | 27.76 | 25.24 | 22.97 |
| 8648 | 30.82 | 30.14 | 27.74 | 25.22 | 22.95 |
| 8650 | 30.81 | 30.14 | 27.74 | 25.24 | 22.95 |
| 8652 | 30.83 | 30.16 | 27.75 | 25.26 | 22.97 |
| 8654 | 30.8  | 30.12 | 27.71 | 25.23 | 22.95 |
| 8656 | 30.79 | 30.13 | 27.73 | 25.25 | 22.96 |
| 8658 | 30.78 | 30.12 | 27.72 | 25.23 | 22.95 |
| 8660 | 30.79 | 30.13 | 27.73 | 25.25 | 22.96 |
| 8662 | 30.76 | 30.1  | 27.71 | 25.23 | 22.94 |
| 8664 | 30.77 | 30.11 | 27.72 | 25.24 | 22.96 |
| 8666 | 30.77 | 30.11 | 27.72 | 25.23 | 22.97 |
| 8668 | 30.72 | 30.07 | 27.69 | 25.19 | 22.94 |
| 8670 | 30.72 | 30.08 | 27.69 | 25.21 | 22.94 |
| 8672 | 30.7  | 30.05 | 27.67 | 25.19 | 22.93 |
| 8674 | 30.7  | 30.05 | 27.67 | 25.19 | 22.93 |
| 8676 | 30.67 | 30.04 | 27.66 | 25.17 | 22.92 |
| 8678 | 30.67 | 30.03 | 27.66 | 25.18 | 22.9  |
| 8680 | 30.68 | 30.04 | 27.67 | 25.2  | 22.93 |
| 8682 | 30.67 | 30.03 | 27.66 | 25.2  | 22.93 |
| 8684 | 30.66 | 30.03 | 27.67 | 25.2  | 22.93 |
| 8686 | 30.66 | 30.03 | 27.67 | 25.21 | 22.94 |
| 8688 | 30.66 | 30.03 | 27.67 | 25.21 | 22.95 |
| 8690 | 30.64 | 30.02 | 27.66 | 25.2  | 22.93 |
| 8692 | 30.63 | 30.01 | 27.66 | 25.2  | 22.93 |
| 8694 | 30.62 | 30    | 27.65 | 25.19 | 22.93 |
| 8696 | 30.6  | 29.98 | 27.64 | 25.19 | 22.94 |
| 8698 | 30.6  | 29.99 | 27.64 | 25.18 | 22.94 |
| 8700 | 30.57 | 29.97 | 27.61 | 25.16 | 22.91 |
| 8702 | 30.55 | 29.94 | 27.6  | 25.15 | 22.9  |
| 8704 | 30.55 | 29.95 | 27.62 | 25.16 | 22.9  |
| 8706 | 30.55 | 29.95 | 27.61 | 25.15 | 22.91 |
| 8708 | 30.54 | 29.94 | 27.61 | 25.16 | 22.91 |
| 8710 | 30.52 | 29.92 | 27.6  | 25.14 | 22.9  |

|      |       |       |       |       |       |
|------|-------|-------|-------|-------|-------|
| 8712 | 30.52 | 29.92 | 27.6  | 25.16 | 22.92 |
| 8714 | 30.5  | 29.92 | 27.6  | 25.15 | 22.91 |
| 8716 | 30.49 | 29.9  | 27.58 | 25.14 | 22.89 |
| 8718 | 30.49 | 29.89 | 27.58 | 25.15 | 22.9  |
| 8720 | 30.5  | 29.91 | 27.6  | 25.16 | 22.92 |
| 8722 | 30.46 | 29.87 | 27.55 | 25.11 | 22.88 |
| 8724 | 30.42 | 29.85 | 27.54 | 25.1  | 22.85 |
| 8726 | 30.46 | 29.88 | 27.57 | 25.14 | 22.89 |
| 8728 | 30.44 | 29.85 | 27.55 | 25.12 | 22.87 |
| 8730 | 30.44 | 29.84 | 27.54 | 25.11 | 22.87 |
| 8732 | 30.41 | 29.82 | 27.52 | 25.09 | 22.86 |
| 8734 | 30.39 | 29.81 | 27.52 | 25.08 | 22.86 |
| 8736 | 30.38 | 29.82 | 27.53 | 25.09 | 22.87 |
| 8738 | 30.39 | 29.81 | 27.52 | 25.09 | 22.87 |
| 8740 | 30.37 | 29.8  | 27.51 | 25.08 | 22.86 |
| 8742 | 30.36 | 29.79 | 27.51 | 25.08 | 22.86 |
| 8744 | 30.35 | 29.78 | 27.5  | 25.07 | 22.86 |
| 8746 | 30.35 | 29.78 | 27.5  | 25.07 | 22.86 |
| 8748 | 30.34 | 29.78 | 27.51 | 25.08 | 22.85 |
| 8750 | 30.38 | 29.81 | 27.54 | 25.1  | 22.88 |
| 8752 | 30.39 | 29.82 | 27.55 | 25.13 | 22.9  |
| 8754 | 30.39 | 29.82 | 27.55 | 25.14 | 22.92 |
| 8756 | 30.37 | 29.82 | 27.55 | 25.14 | 22.92 |
| 8758 | 30.37 | 29.81 | 27.55 | 25.15 | 22.91 |
| 8760 | 30.37 | 29.81 | 27.55 | 25.15 | 22.91 |
| 8762 | 30.35 | 29.81 | 27.54 | 25.15 | 22.91 |
| 8764 | 30.32 | 29.78 | 27.52 | 25.12 | 22.9  |
| 8766 | 30.32 | 29.78 | 27.53 | 25.11 | 22.91 |
| 8768 | 30.32 | 29.78 | 27.53 | 25.11 | 22.91 |
| 8770 | 30.31 | 29.77 | 27.52 | 25.12 | 22.91 |
| 8772 | 30.31 | 29.76 | 27.53 | 25.12 | 22.91 |
| 8774 | 30.3  | 29.76 | 27.52 | 25.12 | 22.91 |
| 8776 | 30.28 | 29.75 | 27.5  | 25.09 | 22.9  |
| 8778 | 30.27 | 29.74 | 27.5  | 25.1  | 22.91 |
| 8780 | 30.27 | 29.75 | 27.51 | 25.11 | 22.91 |
| 8782 | 30.27 | 29.74 | 27.51 | 25.12 | 22.91 |
| 8784 | 30.26 | 29.74 | 27.51 | 25.12 | 22.91 |
| 8786 | 30.26 | 29.73 | 27.51 | 25.12 | 22.91 |
| 8788 | 30.27 | 29.75 | 27.53 | 25.14 | 22.93 |
| 8790 | 30.25 | 29.74 | 27.5  | 25.13 | 22.92 |
| 8792 | 30.23 | 29.74 | 27.52 | 25.15 | 22.94 |
| 8794 | 30.24 | 29.73 | 27.51 | 25.14 | 22.93 |
| 8796 | 30.2  | 29.7  | 27.49 | 25.11 | 22.9  |
| 8798 | 30.2  | 29.69 | 27.47 | 25.1  | 22.9  |

|      |       |       |       |       |       |
|------|-------|-------|-------|-------|-------|
| 8800 | 30.19 | 29.7  | 27.49 | 25.1  | 22.91 |
| 8802 | 30.18 | 29.68 | 27.47 | 25.09 | 22.9  |
| 8804 | 30.17 | 29.68 | 27.46 | 25.09 | 22.9  |
| 8806 | 30.17 | 29.67 | 27.46 | 25.09 | 22.9  |
| 8808 | 30.13 | 29.65 | 27.44 | 25.06 | 22.88 |
| 8810 | 30.13 | 29.64 | 27.43 | 25.06 | 22.87 |
| 8812 | 30.12 | 29.64 | 27.44 | 25.06 | 22.88 |
| 8814 | 30.14 | 29.65 | 27.46 | 25.09 | 22.91 |
| 8816 | 30.13 | 29.64 | 27.45 | 25.09 | 22.9  |
| 8818 | 30.14 | 29.65 | 27.46 | 25.1  | 22.9  |
| 8820 | 30.11 | 29.63 | 27.45 | 25.1  | 22.89 |
| 8822 | 30.1  | 29.62 | 27.44 | 25.09 | 22.9  |
| 8824 | 30.13 | 29.66 | 27.49 | 25.12 | 22.93 |
| 8826 | 30.1  | 29.63 | 27.44 | 25.1  | 22.9  |
| 8828 | 30.1  | 29.64 | 27.46 | 25.1  | 22.9  |
| 8830 | 30.08 | 29.61 | 27.44 | 25.09 | 22.89 |
| 8832 | 30.06 | 29.59 | 27.42 | 25.08 | 22.87 |
| 8834 | 30.06 | 29.59 | 27.44 | 25.09 | 22.9  |
| 8836 | 30.05 | 29.59 | 27.43 | 25.08 | 22.9  |
| 8838 | 30.01 | 29.55 | 27.38 | 25.04 | 22.86 |
| 8840 | 30.04 | 29.59 | 27.42 | 25.09 | 22.91 |
| 8842 | 30.03 | 29.57 | 27.42 | 25.08 | 22.91 |
| 8844 | 30.04 | 29.59 | 27.44 | 25.09 | 22.93 |
| 8846 | 30.06 | 29.6  | 27.46 | 25.12 | 22.95 |
| 8848 | 30.05 | 29.6  | 27.45 | 25.11 | 22.94 |
| 8850 | 30    | 29.57 | 27.42 | 25.07 | 22.92 |
| 8852 | 29.98 | 29.54 | 27.39 | 25.05 | 22.89 |
| 8854 | 29.99 | 29.55 | 27.39 | 25.05 | 22.9  |
| 8856 | 29.97 | 29.52 | 27.39 | 25.05 | 22.89 |
| 8858 | 29.96 | 29.52 | 27.38 | 25.05 | 22.89 |
| 8860 | 29.94 | 29.51 | 27.37 | 25.05 | 22.89 |
| 8862 | 29.93 | 29.51 | 27.38 | 25.05 | 22.88 |
| 8864 | 29.92 | 29.49 | 27.36 | 25.03 | 22.87 |
| 8866 | 29.91 | 29.49 | 27.37 | 25.04 | 22.88 |
| 8868 | 29.89 | 29.48 | 27.36 | 25.04 | 22.87 |
| 8870 | 29.87 | 29.45 | 27.31 | 25    | 22.83 |
| 8872 | 29.86 | 29.44 | 27.32 | 25.01 | 22.82 |
| 8874 | 29.84 | 29.43 | 27.31 | 25    | 22.82 |
| 8876 | 29.83 | 29.44 | 27.32 | 25.01 | 22.83 |
| 8878 | 29.82 | 29.41 | 27.29 | 24.99 | 22.82 |
| 8880 | 29.81 | 29.4  | 27.29 | 24.99 | 22.82 |
| 8882 | 29.81 | 29.4  | 27.29 | 24.99 | 22.82 |
| 8884 | 29.79 | 29.39 | 27.28 | 24.97 | 22.8  |
| 8886 | 29.79 | 29.39 | 27.29 | 24.98 | 22.82 |

|      |       |       |       |       |       |
|------|-------|-------|-------|-------|-------|
| 8888 | 29.79 | 29.38 | 27.28 | 24.98 | 22.81 |
| 8890 | 29.8  | 29.4  | 27.3  | 25    | 22.82 |
| 8892 | 29.77 | 29.37 | 27.27 | 24.98 | 22.82 |
| 8894 | 29.79 | 29.39 | 27.29 | 25.01 | 22.86 |
| 8896 | 29.78 | 29.38 | 27.29 | 24.99 | 22.86 |
| 8898 | 29.78 | 29.37 | 27.28 | 24.99 | 22.85 |
| 8900 | 29.74 | 29.35 | 27.28 | 24.99 | 22.85 |
| 8902 | 29.75 | 29.36 | 27.29 | 24.98 | 22.85 |
| 8904 | 29.75 | 29.36 | 27.28 | 24.98 | 22.86 |
| 8906 | 29.73 | 29.34 | 27.26 | 24.97 | 22.84 |
| 8908 | 29.75 | 29.37 | 27.29 | 25    | 22.87 |
| 8910 | 29.73 | 29.35 | 27.28 | 24.98 | 22.84 |
| 8912 | 29.71 | 29.34 | 27.26 | 24.97 | 22.82 |
| 8914 | 29.68 | 29.32 | 27.24 | 24.95 | 22.81 |
| 8916 | 29.69 | 29.31 | 27.25 | 24.96 | 22.82 |
| 8918 | 29.69 | 29.32 | 27.26 | 24.98 | 22.84 |

|           |    |       |       |       |       |       |
|-----------|----|-------|-------|-------|-------|-------|
| 40kg485C° | 0  | 21.31 | 21.44 | 21.37 | 21.29 | 21.1  |
|           | 2  | 21.34 | 21.48 | 21.4  | 21.31 | 21.12 |
|           | 4  | 21.36 | 21.51 | 21.44 | 21.35 | 21.15 |
|           | 6  | 21.36 | 21.54 | 21.45 | 21.35 | 21.15 |
|           | 8  | 21.35 | 21.52 | 21.43 | 21.34 | 21.13 |
|           | 10 | 21.32 | 21.51 | 21.43 | 21.34 | 21.13 |
|           | 12 | 21.3  | 21.5  | 21.42 | 21.33 | 21.11 |
|           | 14 | 21.33 | 21.56 | 21.47 | 21.38 | 21.16 |
|           | 16 | 21.34 | 21.56 | 21.47 | 21.36 | 21.15 |
|           | 18 | 21.31 | 21.54 | 21.46 | 21.36 | 21.13 |
|           | 20 | 21.28 | 21.54 | 21.45 | 21.36 | 21.12 |
|           | 22 | 21.29 | 21.56 | 21.47 | 21.37 | 21.14 |
|           | 24 | 21.34 | 21.59 | 21.5  | 21.4  | 21.17 |
|           | 26 | 21.34 | 21.61 | 21.51 | 21.41 | 21.17 |
|           | 28 | 21.33 | 21.59 | 21.5  | 21.41 | 21.16 |
|           | 30 | 21.34 | 21.61 | 21.52 | 21.42 | 21.16 |
|           | 32 | 21.36 | 21.64 | 21.55 | 21.44 | 21.18 |
|           | 34 | 21.35 | 21.63 | 21.54 | 21.44 | 21.17 |
|           | 36 | 21.39 | 21.68 | 21.59 | 21.48 | 21.21 |
|           | 38 | 21.37 | 21.65 | 21.56 | 21.46 | 21.18 |
|           | 40 | 21.37 | 21.67 | 21.57 | 21.46 | 21.18 |
|           | 42 | 21.37 | 21.67 | 21.57 | 21.46 | 21.18 |
|           | 44 | 21.38 | 21.68 | 21.58 | 21.47 | 21.19 |
|           | 46 | 21.38 | 21.68 | 21.58 | 21.46 | 21.19 |
|           | 48 | 21.39 | 21.69 | 21.59 | 21.47 | 21.19 |
|           | 50 | 21.38 | 21.68 | 21.57 | 21.45 | 21.18 |
|           | 52 | 21.41 | 21.7  | 21.6  | 21.48 | 21.2  |

|     |       |       |       |       |       |
|-----|-------|-------|-------|-------|-------|
| 54  | 21.43 | 21.72 | 21.61 | 21.49 | 21.21 |
| 56  | 21.42 | 21.71 | 21.6  | 21.48 | 21.2  |
| 58  | 21.46 | 21.73 | 21.63 | 21.51 | 21.21 |
| 60  | 21.47 | 21.75 | 21.64 | 21.52 | 21.22 |
| 62  | 21.5  | 21.76 | 21.65 | 21.54 | 21.22 |
| 64  | 21.53 | 21.77 | 21.67 | 21.55 | 21.23 |
| 66  | 21.52 | 21.75 | 21.65 | 21.53 | 21.21 |
| 68  | 21.55 | 21.77 | 21.67 | 21.55 | 21.22 |
| 70  | 21.57 | 21.78 | 21.69 | 21.56 | 21.23 |
| 72  | 21.59 | 21.79 | 21.68 | 21.56 | 21.22 |
| 74  | 21.61 | 21.8  | 21.69 | 21.57 | 21.23 |
| 76  | 21.63 | 21.82 | 21.71 | 21.59 | 21.25 |
| 78  | 21.64 | 21.81 | 21.7  | 21.57 | 21.25 |
| 80  | 21.66 | 21.82 | 21.7  | 21.56 | 21.24 |
| 82  | 21.67 | 21.81 | 21.69 | 21.54 | 21.24 |
| 84  | 21.72 | 21.83 | 21.71 | 21.56 | 21.24 |
| 86  | 21.74 | 21.83 | 21.71 | 21.57 | 21.25 |
| 88  | 21.77 | 21.84 | 21.72 | 21.58 | 21.25 |
| 90  | 21.81 | 21.84 | 21.72 | 21.58 | 21.25 |
| 92  | 21.85 | 21.87 | 21.74 | 21.58 | 21.25 |
| 94  | 21.88 | 21.88 | 21.75 | 21.61 | 21.27 |
| 96  | 21.9  | 21.87 | 21.74 | 21.6  | 21.25 |
| 98  | 21.94 | 21.88 | 21.75 | 21.6  | 21.25 |
| 100 | 21.99 | 21.87 | 21.75 | 21.6  | 21.26 |
| 102 | 22.05 | 21.9  | 21.77 | 21.61 | 21.27 |
| 104 | 22.12 | 21.93 | 21.79 | 21.65 | 21.31 |
| 106 | 22.15 | 21.91 | 21.77 | 21.63 | 21.27 |
| 108 | 22.19 | 21.92 | 21.79 | 21.64 | 21.27 |
| 110 | 22.24 | 21.91 | 21.79 | 21.64 | 21.26 |
| 112 | 22.31 | 21.93 | 21.82 | 21.67 | 21.29 |
| 114 | 22.36 | 21.95 | 21.83 | 21.67 | 21.28 |
| 116 | 22.4  | 21.93 | 21.8  | 21.65 | 21.26 |
| 118 | 22.48 | 21.99 | 21.85 | 21.69 | 21.32 |
| 120 | 22.52 | 21.96 | 21.82 | 21.67 | 21.3  |
| 122 | 22.58 | 21.97 | 21.83 | 21.67 | 21.28 |
| 124 | 22.66 | 21.99 | 21.84 | 21.68 | 21.3  |
| 126 | 22.71 | 21.98 | 21.83 | 21.67 | 21.29 |
| 128 | 22.76 | 21.97 | 21.83 | 21.66 | 21.27 |
| 130 | 22.88 | 21.99 | 21.85 | 21.69 | 21.31 |
| 132 | 22.92 | 22    | 21.85 | 21.69 | 21.29 |
| 134 | 23    | 22.02 | 21.87 | 21.7  | 21.3  |
| 136 | 23.07 | 22.03 | 21.88 | 21.72 | 21.32 |
| 138 | 23.16 | 22.05 | 21.89 | 21.72 | 21.32 |
| 140 | 23.27 | 22.07 | 21.91 | 21.74 | 21.33 |

|     |       |       |       |       |       |
|-----|-------|-------|-------|-------|-------|
| 142 | 23.31 | 22.05 | 21.89 | 21.72 | 21.31 |
| 144 | 23.4  | 22.06 | 21.89 | 21.71 | 21.31 |
| 146 | 23.48 | 22.06 | 21.89 | 21.71 | 21.29 |
| 148 | 23.58 | 22.08 | 21.91 | 21.73 | 21.32 |
| 150 | 23.64 | 22.05 | 21.88 | 21.7  | 21.29 |
| 152 | 23.73 | 22.08 | 21.89 | 21.71 | 21.3  |
| 154 | 23.87 | 22.11 | 21.92 | 21.73 | 21.32 |
| 156 | 23.97 | 22.13 | 21.93 | 21.75 | 21.34 |
| 158 | 24.03 | 22.09 | 21.9  | 21.72 | 21.31 |
| 160 | 24.12 | 22.09 | 21.88 | 21.71 | 21.3  |
| 162 | 24.23 | 22.09 | 21.88 | 21.7  | 21.29 |
| 164 | 24.34 | 22.1  | 21.88 | 21.7  | 21.28 |
| 166 | 24.43 | 22.1  | 21.87 | 21.69 | 21.28 |
| 168 | 24.52 | 22.11 | 21.88 | 21.68 | 21.28 |
| 170 | 24.64 | 22.12 | 21.87 | 21.68 | 21.28 |
| 172 | 24.75 | 22.13 | 21.88 | 21.69 | 21.28 |
| 174 | 24.87 | 22.14 | 21.88 | 21.69 | 21.28 |
| 176 | 24.99 | 22.15 | 21.88 | 21.69 | 21.28 |
| 178 | 25.13 | 22.16 | 21.89 | 21.69 | 21.28 |
| 180 | 25.25 | 22.17 | 21.89 | 21.69 | 21.28 |
| 182 | 25.39 | 22.2  | 21.91 | 21.72 | 21.29 |
| 184 | 25.55 | 22.23 | 21.93 | 21.74 | 21.32 |
| 186 | 25.64 | 22.22 | 21.92 | 21.73 | 21.29 |
| 188 | 25.82 | 22.26 | 21.95 | 21.76 | 21.33 |
| 190 | 25.93 | 22.25 | 21.93 | 21.73 | 21.31 |
| 192 | 26.03 | 22.26 | 21.92 | 21.73 | 21.29 |
| 194 | 26.21 | 22.31 | 21.96 | 21.77 | 21.33 |
| 196 | 26.34 | 22.28 | 21.92 | 21.72 | 21.3  |
| 198 | 26.5  | 22.31 | 21.95 | 21.74 | 21.31 |
| 200 | 26.62 | 22.3  | 21.93 | 21.73 | 21.3  |
| 202 | 26.8  | 22.32 | 21.93 | 21.73 | 21.29 |
| 204 | 26.96 | 22.34 | 21.94 | 21.73 | 21.3  |
| 206 | 27.13 | 22.39 | 21.99 | 21.77 | 21.34 |
| 208 | 27.28 | 22.4  | 21.98 | 21.76 | 21.33 |
| 210 | 27.46 | 22.42 | 21.98 | 21.75 | 21.32 |
| 212 | 27.62 | 22.46 | 22    | 21.78 | 21.34 |
| 214 | 27.77 | 22.48 | 22.01 | 21.79 | 21.35 |
| 216 | 27.91 | 22.47 | 21.98 | 21.77 | 21.33 |
| 218 | 28.1  | 22.5  | 21.99 | 21.77 | 21.33 |
| 220 | 28.27 | 22.52 | 22    | 21.78 | 21.34 |
| 222 | 28.39 | 22.51 | 21.97 | 21.75 | 21.31 |
| 224 | 28.57 | 22.5  | 21.95 | 21.73 | 21.29 |
| 226 | 28.76 | 22.55 | 21.98 | 21.74 | 21.3  |
| 228 | 28.96 | 22.61 | 22.02 | 21.79 | 21.35 |



|     |       |       |       |       |       |
|-----|-------|-------|-------|-------|-------|
| 230 | 29.11 | 22.61 | 22.01 | 21.77 | 21.31 |
| 232 | 29.26 | 22.61 | 22    | 21.76 | 21.31 |
| 234 | 29.46 | 22.65 | 21.99 | 21.76 | 21.32 |
| 236 | 29.65 | 22.67 | 22    | 21.76 | 21.33 |
| 238 | 29.85 | 22.7  | 22.02 | 21.78 | 21.34 |
| 240 | 30.05 | 22.73 | 22.03 | 21.79 | 21.35 |
| 242 | 30.24 | 22.74 | 22.01 | 21.78 | 21.34 |
| 244 | 30.41 | 22.76 | 22.01 | 21.77 | 21.31 |
| 246 | 30.61 | 22.8  | 22.03 | 21.78 | 21.34 |
| 248 | 30.8  | 22.85 | 22.05 | 21.8  | 21.35 |
| 250 | 31.01 | 22.87 | 22.04 | 21.78 | 21.36 |
| 252 | 31.18 | 22.9  | 22.03 | 21.78 | 21.35 |
| 254 | 31.38 | 22.93 | 22.04 | 21.78 | 21.36 |
| 256 | 31.57 | 22.96 | 22.04 | 21.76 | 21.35 |
| 258 | 31.79 | 22.97 | 22.03 | 21.77 | 21.36 |
| 260 | 31.97 | 22.97 | 22    | 21.74 | 21.32 |
| 262 | 32.18 | 23.01 | 22.03 | 21.75 | 21.33 |
| 264 | 32.45 | 23.07 | 22.07 | 21.79 | 21.37 |
| 266 | 32.65 | 23.12 | 22.08 | 21.79 | 21.37 |
| 268 | 32.83 | 23.14 | 22.07 | 21.79 | 21.37 |
| 270 | 33.04 | 23.17 | 22.08 | 21.79 | 21.37 |
| 272 | 33.23 | 23.19 | 22.07 | 21.78 | 21.36 |
| 274 | 33.49 | 23.23 | 22.07 | 21.78 | 21.37 |
| 276 | 33.68 | 23.27 | 22.09 | 21.78 | 21.36 |
| 278 | 33.91 | 23.3  | 22.08 | 21.78 | 21.37 |
| 280 | 34.14 | 23.35 | 22.1  | 21.8  | 21.39 |
| 282 | 34.34 | 23.38 | 22.1  | 21.79 | 21.37 |
| 284 | 34.56 | 23.38 | 22.07 | 21.75 | 21.35 |
| 286 | 34.77 | 23.41 | 22.07 | 21.76 | 21.34 |
| 288 | 34.98 | 23.45 | 22.07 | 21.75 | 21.33 |
| 290 | 35.23 | 23.47 | 22.07 | 21.75 | 21.34 |
| 292 | 35.45 | 23.53 | 22.09 | 21.77 | 21.35 |
| 294 | 35.66 | 23.57 | 22.09 | 21.76 | 21.34 |
| 296 | 35.87 | 23.61 | 22.09 | 21.76 | 21.34 |
| 298 | 36.12 | 23.64 | 22.09 | 21.75 | 21.35 |
| 300 | 36.39 | 23.74 | 22.15 | 21.81 | 21.39 |
| 302 | 36.58 | 23.73 | 22.12 | 21.77 | 21.35 |
| 304 | 36.79 | 23.76 | 22.12 | 21.76 | 21.35 |
| 306 | 37.07 | 23.83 | 22.14 | 21.78 | 21.37 |
| 308 | 37.32 | 23.88 | 22.14 | 21.79 | 21.38 |
| 310 | 37.54 | 23.92 | 22.16 | 21.79 | 21.37 |
| 312 | 37.78 | 23.96 | 22.16 | 21.79 | 21.37 |
| 314 | 38.03 | 24.01 | 22.17 | 21.79 | 21.36 |
| 316 | 38.26 | 24.05 | 22.18 | 21.8  | 21.38 |

|     |       |       |       |       |       |
|-----|-------|-------|-------|-------|-------|
| 318 | 38.47 | 24.09 | 22.17 | 21.78 | 21.36 |
| 320 | 38.73 | 24.17 | 22.21 | 21.82 | 21.4  |
| 322 | 39    | 24.22 | 22.23 | 21.82 | 21.4  |
| 324 | 39.2  | 24.25 | 22.2  | 21.79 | 21.38 |
| 326 | 39.45 | 24.3  | 22.21 | 21.79 | 21.39 |
| 328 | 39.65 | 24.32 | 22.19 | 21.76 | 21.37 |
| 330 | 39.93 | 24.37 | 22.2  | 21.76 | 21.37 |
| 332 | 40.18 | 24.46 | 22.24 | 21.79 | 21.39 |
| 334 | 40.41 | 24.49 | 22.22 | 21.78 | 21.38 |
| 336 | 40.64 | 24.55 | 22.23 | 21.78 | 21.38 |
| 338 | 40.92 | 24.61 | 22.25 | 21.78 | 21.39 |
| 340 | 41.16 | 24.66 | 22.25 | 21.78 | 21.39 |
| 342 | 41.4  | 24.72 | 22.27 | 21.79 | 21.39 |
| 344 | 41.62 | 24.74 | 22.25 | 21.76 | 21.36 |
| 346 | 41.88 | 24.79 | 22.24 | 21.74 | 21.34 |
| 348 | 42.14 | 24.87 | 22.27 | 21.77 | 21.37 |
| 350 | 42.41 | 24.94 | 22.3  | 21.79 | 21.38 |
| 352 | 42.65 | 25    | 22.31 | 21.8  | 21.4  |
| 354 | 42.95 | 25.08 | 22.34 | 21.81 | 21.41 |
| 356 | 43.19 | 25.13 | 22.34 | 21.81 | 21.39 |
| 358 | 43.4  | 25.17 | 22.31 | 21.77 | 21.37 |
| 360 | 43.72 | 25.26 | 22.36 | 21.81 | 21.4  |
| 362 | 43.98 | 25.34 | 22.39 | 21.82 | 21.41 |
| 364 | 44.23 | 25.4  | 22.4  | 21.83 | 21.42 |
| 366 | 44.48 | 25.47 | 22.41 | 21.82 | 21.43 |
| 368 | 44.72 | 25.52 | 22.42 | 21.8  | 21.4  |
| 370 | 44.97 | 25.55 | 22.4  | 21.78 | 21.38 |
| 372 | 45.23 | 25.63 | 22.4  | 21.79 | 21.38 |
| 374 | 45.48 | 25.69 | 22.42 | 21.79 | 21.39 |
| 376 | 45.73 | 25.77 | 22.44 | 21.8  | 21.4  |
| 378 | 46.04 | 25.86 | 22.48 | 21.82 | 21.42 |
| 380 | 46.3  | 25.95 | 22.51 | 21.84 | 21.45 |
| 382 | 46.55 | 26.01 | 22.51 | 21.82 | 21.43 |
| 384 | 46.81 | 26.09 | 22.54 | 21.84 | 21.46 |
| 386 | 47.08 | 26.14 | 22.53 | 21.81 | 21.43 |
| 388 | 47.32 | 26.23 | 22.55 | 21.82 | 21.45 |
| 390 | 47.57 | 26.3  | 22.56 | 21.83 | 21.45 |
| 392 | 47.84 | 26.4  | 22.6  | 21.85 | 21.46 |
| 394 | 48.08 | 26.44 | 22.57 | 21.8  | 21.42 |
| 396 | 48.36 | 26.54 | 22.61 | 21.83 | 21.43 |
| 398 | 48.61 | 26.61 | 22.61 | 21.81 | 21.44 |
| 400 | 48.86 | 26.67 | 22.6  | 21.8  | 21.43 |
| 402 | 49.18 | 26.76 | 22.64 | 21.82 | 21.44 |
| 404 | 49.47 | 26.87 | 22.69 | 21.85 | 21.47 |

|     |       |       |       |       |       |
|-----|-------|-------|-------|-------|-------|
| 406 | 49.73 | 26.95 | 22.7  | 21.85 | 21.47 |
| 408 | 50    | 27.07 | 22.74 | 21.87 | 21.49 |
| 410 | 50.33 | 27.18 | 22.79 | 21.9  | 21.51 |
| 412 | 50.61 | 27.27 | 22.81 | 21.92 | 21.52 |
| 414 | 50.85 | 27.32 | 22.81 | 21.91 | 21.51 |
| 416 | 51.1  | 27.4  | 22.82 | 21.9  | 21.5  |
| 418 | 51.4  | 27.49 | 22.84 | 21.91 | 21.51 |
| 420 | 51.67 | 27.59 | 22.88 | 21.92 | 21.52 |
| 422 | 51.96 | 27.71 | 22.93 | 21.97 | 21.56 |
| 424 | 52.21 | 27.77 | 22.93 | 21.95 | 21.55 |
| 426 | 52.51 | 27.84 | 22.92 | 21.94 | 21.54 |
| 428 | 52.76 | 27.94 | 22.94 | 21.94 | 21.54 |
| 430 | 53.02 | 28    | 22.96 | 21.93 | 21.53 |
| 432 | 53.28 | 28.08 | 22.97 | 21.93 | 21.53 |
| 434 | 53.55 | 28.18 | 23.01 | 21.95 | 21.55 |
| 436 | 53.85 | 28.27 | 23.01 | 21.92 | 21.54 |
| 438 | 54.09 | 28.34 | 23.01 | 21.91 | 21.52 |
| 440 | 54.38 | 28.45 | 23.06 | 21.95 | 21.56 |
| 442 | 54.66 | 28.51 | 23.04 | 21.93 | 21.54 |
| 444 | 54.93 | 28.63 | 23.07 | 21.92 | 21.53 |
| 446 | 55.23 | 28.74 | 23.13 | 21.96 | 21.58 |
| 448 | 55.5  | 28.83 | 23.15 | 21.98 | 21.58 |
| 450 | 55.81 | 28.95 | 23.18 | 22    | 21.6  |
| 452 | 56.07 | 29.03 | 23.2  | 21.98 | 21.59 |
| 454 | 56.35 | 29.14 | 23.23 | 21.99 | 21.59 |
| 456 | 56.62 | 29.22 | 23.26 | 21.99 | 21.61 |
| 458 | 56.93 | 29.31 | 23.27 | 21.99 | 21.6  |
| 460 | 57.22 | 29.42 | 23.31 | 22.01 | 21.61 |
| 462 | 57.48 | 29.52 | 23.32 | 22    | 21.6  |
| 464 | 57.75 | 29.61 | 23.33 | 22    | 21.6  |
| 466 | 58.05 | 29.71 | 23.36 | 22.01 | 21.6  |
| 468 | 58.33 | 29.82 | 23.39 | 22.01 | 21.61 |
| 470 | 58.6  | 29.9  | 23.4  | 22.02 | 21.61 |
| 472 | 58.83 | 29.97 | 23.39 | 21.99 | 21.58 |
| 474 | 59.1  | 30.07 | 23.42 | 21.99 | 21.59 |
| 476 | 59.44 | 30.17 | 23.45 | 22    | 21.6  |
| 478 | 59.75 | 30.31 | 23.51 | 22.04 | 21.64 |
| 480 | 60    | 30.37 | 23.51 | 22.03 | 21.6  |
| 482 | 60.33 | 30.47 | 23.54 | 22.04 | 21.61 |
| 484 | 60.61 | 30.59 | 23.58 | 22.05 | 21.62 |
| 486 | 60.88 | 30.68 | 23.6  | 22.06 | 21.63 |
| 488 | 61.17 | 30.8  | 23.65 | 22.08 | 21.66 |
| 490 | 61.49 | 30.9  | 23.67 | 22.09 | 21.66 |
| 492 | 61.77 | 31    | 23.7  | 22.09 | 21.65 |

|     |       |       |       |       |       |
|-----|-------|-------|-------|-------|-------|
| 494 | 62.06 | 31.12 | 23.73 | 22.12 | 21.67 |
| 496 | 62.35 | 31.23 | 23.78 | 22.15 | 21.72 |
| 498 | 62.68 | 31.36 | 23.82 | 22.17 | 21.72 |
| 500 | 62.93 | 31.42 | 23.82 | 22.15 | 21.69 |
| 502 | 63.24 | 31.54 | 23.87 | 22.16 | 21.72 |
| 504 | 63.48 | 31.61 | 23.88 | 22.16 | 21.71 |
| 506 | 63.78 | 31.7  | 23.88 | 22.13 | 21.69 |
| 508 | 64.09 | 31.83 | 23.93 | 22.17 | 21.72 |
| 510 | 64.35 | 31.9  | 23.94 | 22.15 | 21.7  |
| 512 | 64.63 | 32    | 23.96 | 22.16 | 21.7  |
| 514 | 64.96 | 32.12 | 24.02 | 22.2  | 21.75 |
| 516 | 65.26 | 32.23 | 24.04 | 22.19 | 21.73 |
| 518 | 65.52 | 32.31 | 24.06 | 22.19 | 21.72 |
| 520 | 65.83 | 32.42 | 24.1  | 22.22 | 21.75 |
| 522 | 66.14 | 32.53 | 24.12 | 22.21 | 21.74 |
| 524 | 66.43 | 32.65 | 24.18 | 22.24 | 21.77 |
| 526 | 66.73 | 32.76 | 24.23 | 22.28 | 21.8  |
| 528 | 67.02 | 32.87 | 24.26 | 22.28 | 21.81 |
| 530 | 67.34 | 32.94 | 24.28 | 22.28 | 21.79 |
| 532 | 67.66 | 33.1  | 24.36 | 22.32 | 21.82 |
| 534 | 67.92 | 33.16 | 24.35 | 22.29 | 21.79 |
| 536 | 68.18 | 33.23 | 24.35 | 22.28 | 21.78 |
| 538 | 68.55 | 33.4  | 24.41 | 22.33 | 21.82 |
| 540 | 68.83 | 33.49 | 24.46 | 22.35 | 21.83 |
| 542 | 69.09 | 33.58 | 24.48 | 22.34 | 21.82 |
| 544 | 69.4  | 33.7  | 24.52 | 22.37 | 21.85 |
| 546 | 69.73 | 33.81 | 24.55 | 22.37 | 21.84 |
| 548 | 69.99 | 33.89 | 24.56 | 22.36 | 21.84 |
| 550 | 70.32 | 34.01 | 24.63 | 22.41 | 21.87 |
| 552 | 70.61 | 34.13 | 24.69 | 22.43 | 21.88 |
| 554 | 70.92 | 34.19 | 24.67 | 22.41 | 21.85 |
| 556 | 71.23 | 34.33 | 24.74 | 22.44 | 21.88 |
| 558 | 71.49 | 34.39 | 24.74 | 22.42 | 21.87 |
| 560 | 71.8  | 34.5  | 24.79 | 22.46 | 21.88 |
| 562 | 72.13 | 34.62 | 24.82 | 22.47 | 21.89 |
| 564 | 72.4  | 34.69 | 24.83 | 22.46 | 21.89 |
| 566 | 72.68 | 34.8  | 24.87 | 22.48 | 21.91 |
| 568 | 73.01 | 34.88 | 24.9  | 22.48 | 21.9  |
| 570 | 73.31 | 35    | 24.94 | 22.49 | 21.9  |
| 572 | 73.6  | 35.1  | 24.97 | 22.5  | 21.91 |
| 574 | 73.9  | 35.19 | 25    | 22.51 | 21.92 |
| 576 | 74.21 | 35.26 | 25.01 | 22.49 | 21.91 |
| 578 | 74.52 | 35.39 | 25.07 | 22.54 | 21.92 |
| 580 | 74.83 | 35.5  | 25.13 | 22.58 | 21.94 |

|     |       |       |       |       |       |
|-----|-------|-------|-------|-------|-------|
| 582 | 75.13 | 35.61 | 25.18 | 22.6  | 21.97 |
| 584 | 75.4  | 35.68 | 25.19 | 22.6  | 21.96 |
| 586 | 75.76 | 35.78 | 25.23 | 22.61 | 21.97 |
| 588 | 76.04 | 35.89 | 25.26 | 22.61 | 21.95 |
| 590 | 76.32 | 35.98 | 25.29 | 22.63 | 21.97 |
| 592 | 76.62 | 36.07 | 25.32 | 22.64 | 21.98 |
| 594 | 76.95 | 36.14 | 25.35 | 22.64 | 21.98 |
| 596 | 77.26 | 36.28 | 25.4  | 22.68 | 22    |
| 598 | 77.54 | 36.38 | 25.44 | 22.7  | 22.01 |
| 600 | 77.83 | 36.47 | 25.47 | 22.7  | 22.02 |
| 602 | 78.17 | 36.57 | 25.5  | 22.72 | 22.03 |
| 604 | 78.47 | 36.67 | 25.55 | 22.73 | 22.03 |
| 606 | 78.78 | 36.77 | 25.61 | 22.77 | 22.06 |
| 608 | 79.09 | 36.87 | 25.64 | 22.79 | 22.06 |
| 610 | 79.43 | 36.95 | 25.67 | 22.8  | 22.06 |
| 612 | 79.73 | 37.07 | 25.73 | 22.84 | 22.09 |
| 614 | 80.02 | 37.15 | 25.75 | 22.84 | 22.09 |
| 616 | 80.34 | 37.25 | 25.79 | 22.87 | 22.11 |
| 618 | 80.68 | 37.34 | 25.83 | 22.88 | 22.12 |
| 620 | 80.97 | 37.42 | 25.85 | 22.87 | 22.11 |
| 622 | 81.24 | 37.5  | 25.88 | 22.87 | 22.11 |
| 624 | 81.53 | 37.59 | 25.91 | 22.88 | 22.11 |
| 626 | 81.91 | 37.7  | 25.96 | 22.92 | 22.15 |
| 628 | 82.21 | 37.81 | 26.01 | 22.95 | 22.16 |
| 630 | 82.48 | 37.87 | 26.03 | 22.94 | 22.15 |
| 632 | 82.78 | 37.95 | 26.06 | 22.95 | 22.15 |
| 634 | 83.14 | 38.04 | 26.11 | 22.97 | 22.17 |
| 636 | 83.45 | 38.16 | 26.16 | 23    | 22.19 |
| 638 | 83.75 | 38.25 | 26.21 | 23.03 | 22.2  |
| 640 | 84.06 | 38.34 | 26.25 | 23.06 | 22.21 |
| 642 | 84.41 | 38.42 | 26.28 | 23.07 | 22.22 |
| 644 | 84.72 | 38.52 | 26.33 | 23.08 | 22.23 |
| 646 | 85.02 | 38.61 | 26.37 | 23.11 | 22.24 |
| 648 | 85.33 | 38.69 | 26.4  | 23.13 | 22.26 |
| 650 | 85.7  | 38.79 | 26.44 | 23.15 | 22.27 |
| 652 | 86    | 38.88 | 26.5  | 23.18 | 22.3  |
| 654 | 86.27 | 38.94 | 26.51 | 23.16 | 22.28 |
| 656 | 86.61 | 39.05 | 26.57 | 23.2  | 22.31 |
| 658 | 86.97 | 39.16 | 26.61 | 23.22 | 22.32 |
| 660 | 87.27 | 39.23 | 26.66 | 23.24 | 22.33 |
| 662 | 87.56 | 39.3  | 26.69 | 23.24 | 22.33 |
| 664 | 87.84 | 39.37 | 26.72 | 23.25 | 22.33 |
| 666 | 88.18 | 39.46 | 26.76 | 23.27 | 22.35 |
| 668 | 88.51 | 39.51 | 26.77 | 23.26 | 22.32 |

|     |        |       |       |       |       |
|-----|--------|-------|-------|-------|-------|
| 670 | 88.82  | 39.58 | 26.8  | 23.27 | 22.32 |
| 672 | 89.17  | 39.71 | 26.88 | 23.33 | 22.36 |
| 674 | 89.54  | 39.8  | 26.93 | 23.36 | 22.38 |
| 676 | 89.85  | 39.9  | 26.99 | 23.39 | 22.4  |
| 678 | 90.15  | 39.97 | 27.02 | 23.4  | 22.41 |
| 680 | 90.47  | 40.06 | 27.07 | 23.44 | 22.44 |
| 682 | 90.83  | 40.15 | 27.1  | 23.46 | 22.44 |
| 684 | 91.14  | 40.23 | 27.15 | 23.48 | 22.46 |
| 686 | 91.46  | 40.32 | 27.2  | 23.5  | 22.49 |
| 688 | 91.8   | 40.42 | 27.27 | 23.55 | 22.53 |
| 690 | 92.18  | 40.53 | 27.33 | 23.58 | 22.55 |
| 692 | 92.46  | 40.58 | 27.34 | 23.57 | 22.54 |
| 694 | 92.77  | 40.66 | 27.38 | 23.59 | 22.55 |
| 696 | 93.08  | 40.74 | 27.42 | 23.61 | 22.58 |
| 698 | 93.46  | 40.84 | 27.49 | 23.65 | 22.6  |
| 700 | 93.72  | 40.86 | 27.47 | 23.62 | 22.54 |
| 702 | 94     | 40.92 | 27.5  | 23.63 | 22.53 |
| 704 | 94.34  | 41.02 | 27.57 | 23.68 | 22.57 |
| 706 | 94.73  | 41.1  | 27.61 | 23.71 | 22.59 |
| 708 | 95.07  | 41.2  | 27.68 | 23.76 | 22.63 |
| 710 | 95.37  | 41.27 | 27.71 | 23.76 | 22.63 |
| 712 | 95.67  | 41.33 | 27.74 | 23.78 | 22.63 |
| 714 | 96.03  | 41.4  | 27.77 | 23.79 | 22.64 |
| 716 | 96.34  | 41.47 | 27.82 | 23.8  | 22.65 |
| 718 | 96.65  | 41.55 | 27.86 | 23.81 | 22.66 |
| 720 | 97.02  | 41.62 | 27.9  | 23.83 | 22.67 |
| 722 | 97.34  | 41.7  | 27.94 | 23.86 | 22.68 |
| 724 | 97.67  | 41.78 | 27.99 | 23.88 | 22.7  |
| 726 | 97.97  | 41.83 | 28.01 | 23.88 | 22.69 |
| 728 | 98.34  | 41.9  | 28.05 | 23.91 | 22.71 |
| 730 | 98.65  | 41.99 | 28.11 | 23.94 | 22.72 |
| 732 | 98.99  | 42.08 | 28.17 | 23.98 | 22.73 |
| 734 | 99.33  | 42.14 | 28.22 | 24.01 | 22.76 |
| 736 | 99.65  | 42.21 | 28.27 | 24.03 | 22.78 |
| 738 | 100.02 | 42.27 | 28.3  | 24.05 | 22.78 |
| 740 | 100.33 | 42.36 | 28.34 | 24.08 | 22.79 |
| 742 | 100.65 | 42.43 | 28.38 | 24.1  | 22.81 |
| 744 | 100.98 | 42.51 | 28.44 | 24.14 | 22.83 |
| 746 | 101.34 | 42.57 | 28.47 | 24.15 | 22.84 |
| 748 | 101.66 | 42.63 | 28.51 | 24.15 | 22.85 |
| 750 | 101.98 | 42.7  | 28.55 | 24.18 | 22.86 |
| 752 | 102.32 | 42.72 | 28.55 | 24.16 | 22.82 |
| 754 | 102.67 | 42.83 | 28.63 | 24.21 | 22.87 |
| 756 | 102.98 | 42.88 | 28.66 | 24.22 | 22.87 |

|     |        |       |       |       |       |
|-----|--------|-------|-------|-------|-------|
| 758 | 103.27 | 42.93 | 28.68 | 24.22 | 22.86 |
| 760 | 103.64 | 42.98 | 28.71 | 24.23 | 22.86 |
| 762 | 103.98 | 43.06 | 28.77 | 24.25 | 22.86 |
| 764 | 104.35 | 43.16 | 28.86 | 24.33 | 22.92 |
| 766 | 104.68 | 43.22 | 28.9  | 24.36 | 22.94 |
| 768 | 105.01 | 43.29 | 28.93 | 24.39 | 22.95 |
| 770 | 105.37 | 43.34 | 28.97 | 24.39 | 22.94 |
| 772 | 105.73 | 43.44 | 29.05 | 24.44 | 22.98 |
| 774 | 106.04 | 43.5  | 29.09 | 24.47 | 23    |
| 776 | 106.34 | 43.52 | 29.1  | 24.46 | 22.98 |
| 778 | 106.73 | 43.59 | 29.14 | 24.49 | 22.99 |
| 780 | 107.06 | 43.63 | 29.17 | 24.49 | 22.98 |
| 782 | 107.42 | 43.74 | 29.26 | 24.55 | 23.04 |
| 784 | 107.7  | 43.75 | 29.25 | 24.52 | 23.01 |
| 786 | 108.1  | 43.84 | 29.31 | 24.55 | 23.04 |
| 788 | 108.44 | 43.91 | 29.36 | 24.58 | 23.05 |
| 790 | 108.76 | 43.96 | 29.41 | 24.61 | 23.06 |
| 792 | 109.07 | 44.01 | 29.43 | 24.62 | 23.06 |
| 794 | 109.46 | 44.07 | 29.48 | 24.63 | 23.08 |
| 796 | 109.85 | 44.18 | 29.58 | 24.71 | 23.13 |
| 798 | 110.19 | 44.22 | 29.6  | 24.73 | 23.12 |
| 800 | 110.55 | 44.31 | 29.67 | 24.78 | 23.15 |
| 802 | 110.95 | 44.37 | 29.73 | 24.81 | 23.16 |
| 804 | 111.29 | 44.43 | 29.77 | 24.84 | 23.19 |
| 806 | 111.64 | 44.49 | 29.82 | 24.86 | 23.21 |
| 808 | 112    | 44.56 | 29.87 | 24.9  | 23.22 |
| 810 | 112.37 | 44.61 | 29.91 | 24.91 | 23.23 |
| 812 | 112.71 | 44.66 | 29.95 | 24.93 | 23.24 |
| 814 | 113.03 | 44.71 | 29.99 | 24.93 | 23.24 |
| 816 | 113.34 | 44.77 | 30.03 | 24.95 | 23.26 |
| 818 | 113.77 | 44.85 | 30.09 | 25    | 23.29 |
| 820 | 114.1  | 44.89 | 30.12 | 25.02 | 23.29 |
| 822 | 114.45 | 44.94 | 30.17 | 25.04 | 23.31 |
| 824 | 114.8  | 45    | 30.21 | 25.06 | 23.31 |
| 826 | 115.18 | 45.06 | 30.24 | 25.06 | 23.31 |
| 828 | 115.5  | 45.1  | 30.27 | 25.08 | 23.32 |
| 830 | 115.87 | 45.19 | 30.34 | 25.12 | 23.34 |
| 832 | 116.21 | 45.22 | 30.37 | 25.15 | 23.35 |
| 834 | 116.62 | 45.28 | 30.43 | 25.19 | 23.37 |
| 836 | 116.94 | 45.31 | 30.44 | 25.18 | 23.35 |
| 838 | 117.28 | 45.37 | 30.49 | 25.2  | 23.37 |
| 840 | 117.63 | 45.43 | 30.53 | 25.23 | 23.4  |
| 842 | 118.06 | 45.5  | 30.59 | 25.27 | 23.42 |
| 844 | 118.42 | 45.56 | 30.66 | 25.32 | 23.45 |

|     |        |       |       |       |       |
|-----|--------|-------|-------|-------|-------|
| 846 | 118.74 | 45.59 | 30.68 | 25.32 | 23.43 |
| 848 | 119.15 | 45.64 | 30.72 | 25.34 | 23.44 |
| 850 | 119.49 | 45.71 | 30.76 | 25.36 | 23.46 |
| 852 | 119.84 | 45.75 | 30.8  | 25.39 | 23.47 |
| 854 | 120.16 | 45.79 | 30.83 | 25.39 | 23.48 |
| 856 | 120.52 | 45.85 | 30.89 | 25.44 | 23.5  |
| 858 | 120.93 | 45.91 | 30.93 | 25.45 | 23.51 |
| 860 | 121.28 | 45.97 | 30.98 | 25.48 | 23.52 |
| 862 | 121.64 | 46.02 | 31.03 | 25.5  | 23.53 |
| 864 | 121.98 | 46.04 | 31.04 | 25.5  | 23.53 |
| 866 | 122.41 | 46.12 | 31.1  | 25.55 | 23.56 |
| 868 | 122.77 | 46.18 | 31.16 | 25.58 | 23.58 |
| 870 | 123.14 | 46.26 | 31.24 | 25.64 | 23.6  |
| 872 | 123.48 | 46.29 | 31.26 | 25.65 | 23.62 |
| 874 | 123.89 | 46.34 | 31.3  | 25.67 | 23.62 |
| 876 | 124.23 | 46.39 | 31.33 | 25.67 | 23.62 |
| 878 | 124.58 | 46.42 | 31.38 | 25.71 | 23.64 |
| 880 | 124.96 | 46.49 | 31.43 | 25.75 | 23.66 |
| 882 | 125.39 | 46.54 | 31.48 | 25.78 | 23.68 |
| 884 | 125.74 | 46.59 | 31.52 | 25.8  | 23.7  |
| 886 | 126.1  | 46.65 | 31.57 | 25.84 | 23.73 |
| 888 | 126.46 | 46.69 | 31.61 | 25.84 | 23.72 |
| 890 | 126.85 | 46.74 | 31.66 | 25.87 | 23.74 |
| 892 | 127.21 | 46.79 | 31.71 | 25.9  | 23.75 |
| 894 | 127.56 | 46.84 | 31.75 | 25.92 | 23.77 |
| 896 | 128    | 46.9  | 31.8  | 25.95 | 23.8  |
| 898 | 128.36 | 46.96 | 31.83 | 25.97 | 23.81 |
| 900 | 128.71 | 46.99 | 31.87 | 25.98 | 23.82 |
| 902 | 129.07 | 47.03 | 31.91 | 26    | 23.83 |
| 904 | 129.5  | 47.09 | 31.97 | 26.05 | 23.86 |
| 906 | 129.83 | 47.11 | 31.98 | 26.04 | 23.83 |
| 908 | 130.19 | 47.16 | 32.03 | 26.08 | 23.86 |
| 910 | 130.55 | 47.2  | 32.07 | 26.1  | 23.87 |
| 912 | 130.9  | 47.24 | 32.11 | 26.11 | 23.88 |
| 914 | 131.35 | 47.3  | 32.17 | 26.15 | 23.91 |
| 916 | 131.68 | 47.31 | 32.18 | 26.15 | 23.88 |
| 918 | 132.06 | 47.36 | 32.22 | 26.17 | 23.91 |
| 920 | 132.43 | 47.39 | 32.25 | 26.19 | 23.91 |
| 922 | 132.9  | 47.48 | 32.33 | 26.26 | 23.97 |
| 924 | 133.27 | 47.54 | 32.4  | 26.3  | 23.99 |
| 926 | 133.62 | 47.58 | 32.43 | 26.32 | 24.01 |
| 928 | 133.97 | 47.6  | 32.46 | 26.34 | 23.99 |
| 930 | 134.38 | 47.61 | 32.48 | 26.33 | 23.97 |
| 932 | 134.76 | 47.7  | 32.56 | 26.39 | 24.04 |



|      |        |       |       |       |       |
|------|--------|-------|-------|-------|-------|
| 934  | 135.17 | 47.77 | 32.63 | 26.45 | 24.07 |
| 936  | 135.53 | 47.79 | 32.64 | 26.46 | 24.06 |
| 938  | 135.97 | 47.84 | 32.68 | 26.48 | 24.08 |
| 940  | 136.34 | 47.88 | 32.73 | 26.51 | 24.09 |
| 942  | 136.7  | 47.91 | 32.76 | 26.52 | 24.09 |
| 944  | 137.11 | 47.95 | 32.8  | 26.53 | 24.11 |
| 946  | 137.49 | 48    | 32.84 | 26.56 | 24.13 |
| 948  | 137.88 | 48.06 | 32.91 | 26.62 | 24.16 |
| 950  | 138.23 | 48.09 | 32.94 | 26.63 | 24.18 |
| 952  | 138.57 | 48.1  | 32.95 | 26.61 | 24.15 |
| 954  | 139.02 | 48.13 | 32.98 | 26.62 | 24.17 |
| 956  | 139.39 | 48.2  | 33.05 | 26.69 | 24.19 |
| 958  | 139.77 | 48.23 | 33.08 | 26.7  | 24.19 |
| 960  | 140.13 | 48.25 | 33.1  | 26.7  | 24.18 |
| 962  | 140.6  | 48.31 | 33.16 | 26.75 | 24.21 |
| 964  | 140.97 | 48.36 | 33.22 | 26.79 | 24.23 |
| 966  | 141.33 | 48.39 | 33.25 | 26.8  | 24.23 |
| 968  | 141.71 | 48.42 | 33.28 | 26.82 | 24.24 |
| 970  | 142.12 | 48.44 | 33.3  | 26.82 | 24.23 |
| 972  | 142.49 | 48.49 | 33.35 | 26.84 | 24.24 |
| 974  | 142.88 | 48.55 | 33.4  | 26.89 | 24.29 |
| 976  | 143.3  | 48.56 | 33.42 | 26.89 | 24.29 |
| 978  | 143.68 | 48.61 | 33.46 | 26.91 | 24.3  |
| 980  | 144.1  | 48.67 | 33.53 | 26.96 | 24.31 |
| 982  | 144.48 | 48.71 | 33.57 | 27    | 24.36 |
| 984  | 144.85 | 48.78 | 33.63 | 27.03 | 24.39 |
| 986  | 145.26 | 48.8  | 33.65 | 27.03 | 24.38 |
| 988  | 145.65 | 48.87 | 33.72 | 27.08 | 24.4  |
| 990  | 146.01 | 48.87 | 33.72 | 27.07 | 24.39 |
| 992  | 146.42 | 48.93 | 33.79 | 27.11 | 24.41 |
| 994  | 146.88 | 48.98 | 33.84 | 27.15 | 24.45 |
| 996  | 147.27 | 49.01 | 33.88 | 27.17 | 24.47 |
| 998  | 147.67 | 49.06 | 33.93 | 27.21 | 24.49 |
| 1000 | 148.12 | 49.12 | 33.98 | 27.24 | 24.51 |
| 1002 | 148.48 | 49.13 | 33.98 | 27.22 | 24.49 |
| 1004 | 148.87 | 49.18 | 34.06 | 27.27 | 24.52 |
| 1006 | 149.28 | 49.25 | 34.12 | 27.33 | 24.57 |
| 1008 | 149.64 | 49.28 | 34.15 | 27.35 | 24.59 |
| 1010 | 150.1  | 49.34 | 34.21 | 27.38 | 24.6  |
| 1012 | 150.46 | 49.37 | 34.23 | 27.38 | 24.6  |
| 1014 | 150.83 | 49.38 | 34.26 | 27.41 | 24.61 |
| 1016 | 151.24 | 49.45 | 34.31 | 27.45 | 24.64 |
| 1018 | 151.71 | 49.48 | 34.34 | 27.47 | 24.65 |
| 1020 | 152.11 | 49.54 | 34.41 | 27.52 | 24.69 |

|      |        |       |       |       |       |
|------|--------|-------|-------|-------|-------|
| 1022 | 152.5  | 49.56 | 34.44 | 27.52 | 24.69 |
| 1024 | 152.88 | 49.61 | 34.47 | 27.54 | 24.71 |
| 1026 | 153.29 | 49.63 | 34.47 | 27.53 | 24.7  |
| 1028 | 153.68 | 49.69 | 34.55 | 27.58 | 24.73 |
| 1030 | 154.09 | 49.75 | 34.61 | 27.63 | 24.78 |
| 1032 | 154.48 | 49.77 | 34.63 | 27.64 | 24.77 |
| 1034 | 154.93 | 49.82 | 34.68 | 27.67 | 24.79 |
| 1036 | 155.32 | 49.86 | 34.72 | 27.7  | 24.81 |
| 1038 | 155.7  | 49.89 | 34.75 | 27.74 | 24.82 |
| 1040 | 156.1  | 49.94 | 34.81 | 27.77 | 24.84 |
| 1042 | 156.55 | 49.98 | 34.84 | 27.79 | 24.86 |
| 1044 | 156.96 | 50.04 | 34.91 | 27.84 | 24.88 |
| 1046 | 157.33 | 50.07 | 34.94 | 27.85 | 24.89 |
| 1048 | 157.71 | 50.1  | 34.97 | 27.88 | 24.91 |
| 1050 | 158.14 | 50.14 | 35    | 27.9  | 24.93 |
| 1052 | 158.53 | 50.17 | 35.03 | 27.89 | 24.94 |
| 1054 | 158.9  | 50.18 | 35.05 | 27.89 | 24.94 |
| 1056 | 159.34 | 50.26 | 35.12 | 27.95 | 24.97 |
| 1058 | 159.83 | 50.31 | 35.17 | 27.99 | 24.99 |
| 1060 | 160.2  | 50.35 | 35.21 | 28.01 | 25.01 |
| 1062 | 160.57 | 50.38 | 35.24 | 28.03 | 25.02 |
| 1064 | 160.96 | 50.42 | 35.28 | 28.05 | 25.04 |
| 1066 | 161.38 | 50.44 | 35.29 | 28.05 | 25.02 |
| 1068 | 161.8  | 50.51 | 35.37 | 28.11 | 25.06 |
| 1070 | 162.2  | 50.55 | 35.42 | 28.15 | 25.09 |
| 1072 | 162.6  | 50.59 | 35.44 | 28.18 | 25.11 |
| 1074 | 163.06 | 50.63 | 35.48 | 28.2  | 25.12 |
| 1076 | 163.49 | 50.71 | 35.57 | 28.27 | 25.17 |
| 1078 | 163.88 | 50.76 | 35.61 | 28.29 | 25.19 |
| 1080 | 164.27 | 50.79 | 35.65 | 28.31 | 25.18 |
| 1082 | 164.68 | 50.79 | 35.66 | 28.31 | 25.2  |
| 1084 | 165.07 | 50.86 | 35.71 | 28.34 | 25.23 |
| 1086 | 165.44 | 50.89 | 35.73 | 28.36 | 25.24 |
| 1088 | 165.82 | 50.89 | 35.74 | 28.35 | 25.21 |
| 1090 | 166.29 | 50.95 | 35.78 | 28.38 | 25.23 |
| 1092 | 166.71 | 51    | 35.85 | 28.42 | 25.27 |
| 1094 | 167.11 | 51.03 | 35.87 | 28.43 | 25.28 |
| 1096 | 167.52 | 51.09 | 35.93 | 28.47 | 25.3  |
| 1098 | 167.92 | 51.13 | 35.97 | 28.51 | 25.31 |
| 1100 | 168.36 | 51.16 | 36.01 | 28.53 | 25.31 |
| 1102 | 168.77 | 51.23 | 36.08 | 28.59 | 25.38 |
| 1104 | 169.12 | 51.23 | 36.06 | 28.56 | 25.33 |
| 1106 | 169.59 | 51.26 | 36.1  | 28.59 | 25.35 |
| 1108 | 169.99 | 51.32 | 36.15 | 28.63 | 25.37 |

|      |        |       |       |       |       |
|------|--------|-------|-------|-------|-------|
| 1110 | 170.39 | 51.36 | 36.18 | 28.65 | 25.39 |
| 1112 | 170.79 | 51.4  | 36.22 | 28.67 | 25.4  |
| 1114 | 171.23 | 51.42 | 36.25 | 28.67 | 25.41 |
| 1116 | 171.63 | 51.48 | 36.3  | 28.71 | 25.43 |
| 1118 | 172.02 | 51.51 | 36.32 | 28.72 | 25.44 |
| 1120 | 172.44 | 51.58 | 36.39 | 28.78 | 25.48 |
| 1122 | 172.85 | 51.64 | 36.44 | 28.82 | 25.51 |
| 1124 | 173.31 | 51.65 | 36.48 | 28.83 | 25.53 |
| 1126 | 173.7  | 51.69 | 36.51 | 28.84 | 25.52 |
| 1128 | 174.12 | 51.76 | 36.55 | 28.89 | 25.55 |
| 1130 | 174.58 | 51.77 | 36.58 | 28.9  | 25.54 |
| 1132 | 175.01 | 51.85 | 36.64 | 28.95 | 25.56 |
| 1134 | 175.38 | 51.87 | 36.67 | 28.96 | 25.58 |
| 1136 | 175.77 | 51.9  | 36.69 | 28.97 | 25.58 |
| 1138 | 176.22 | 51.94 | 36.73 | 29    | 25.6  |
| 1140 | 176.6  | 51.98 | 36.77 | 29.02 | 25.61 |
| 1142 | 176.99 | 52.02 | 36.8  | 29.04 | 25.63 |
| 1144 | 177.39 | 52.06 | 36.83 | 29.06 | 25.64 |
| 1146 | 177.87 | 52.11 | 36.88 | 29.08 | 25.67 |
| 1148 | 178.27 | 52.15 | 36.91 | 29.1  | 25.67 |
| 1150 | 178.68 | 52.2  | 36.96 | 29.15 | 25.71 |
| 1152 | 179.08 | 52.25 | 37.01 | 29.17 | 25.73 |
| 1154 | 179.54 | 52.29 | 37.03 | 29.18 | 25.74 |
| 1156 | 179.95 | 52.37 | 37.1  | 29.24 | 25.79 |
| 1158 | 180.3  | 52.38 | 37.1  | 29.24 | 25.75 |
| 1160 | 180.71 | 52.43 | 37.15 | 29.27 | 25.77 |
| 1162 | 181.17 | 52.46 | 37.18 | 29.3  | 25.78 |
| 1164 | 181.57 | 52.5  | 37.22 | 29.32 | 25.79 |
| 1166 | 181.98 | 52.55 | 37.25 | 29.34 | 25.82 |
| 1168 | 182.4  | 52.59 | 37.3  | 29.37 | 25.85 |
| 1170 | 182.9  | 52.67 | 37.38 | 29.44 | 25.9  |
| 1172 | 183.27 | 52.71 | 37.41 | 29.46 | 25.9  |
| 1174 | 183.62 | 52.72 | 37.4  | 29.43 | 25.88 |
| 1176 | 184.01 | 52.76 | 37.43 | 29.45 | 25.89 |
| 1178 | 184.48 | 52.8  | 37.46 | 29.47 | 25.9  |
| 1180 | 184.88 | 52.85 | 37.5  | 29.49 | 25.92 |
| 1182 | 185.3  | 52.9  | 37.54 | 29.53 | 25.93 |
| 1184 | 185.78 | 52.94 | 37.58 | 29.54 | 25.95 |
| 1186 | 186.21 | 53.01 | 37.63 | 29.59 | 25.99 |
| 1188 | 186.61 | 53.09 | 37.7  | 29.65 | 26.03 |
| 1190 | 186.98 | 53.11 | 37.71 | 29.64 | 26.02 |
| 1192 | 187.37 | 53.15 | 37.75 | 29.67 | 26.04 |
| 1194 | 187.83 | 53.17 | 37.76 | 29.67 | 26.03 |
| 1196 | 188.27 | 53.25 | 37.84 | 29.73 | 26.08 |

|      |        |       |       |       |       |
|------|--------|-------|-------|-------|-------|
| 1198 | 188.67 | 53.29 | 37.86 | 29.75 | 26.09 |
| 1200 | 189.07 | 53.32 | 37.89 | 29.77 | 26.09 |
| 1202 | 189.56 | 53.38 | 37.93 | 29.8  | 26.11 |
| 1204 | 189.95 | 53.41 | 37.95 | 29.82 | 26.11 |
| 1206 | 190.35 | 53.46 | 38    | 29.85 | 26.15 |
| 1208 | 190.84 | 53.51 | 38.05 | 29.88 | 26.16 |
| 1210 | 191.25 | 53.58 | 38.1  | 29.91 | 26.19 |
| 1212 | 191.63 | 53.62 | 38.13 | 29.96 | 26.22 |
| 1214 | 192.04 | 53.67 | 38.16 | 29.96 | 26.22 |
| 1216 | 192.43 | 53.69 | 38.17 | 29.96 | 26.21 |
| 1218 | 192.95 | 53.77 | 38.24 | 30.01 | 26.25 |
| 1220 | 193.36 | 53.82 | 38.27 | 30.03 | 26.26 |
| 1222 | 193.74 | 53.83 | 38.28 | 30.04 | 26.25 |
| 1224 | 194.14 | 53.86 | 38.32 | 30.05 | 26.27 |
| 1226 | 194.62 | 53.91 | 38.35 | 30.08 | 26.28 |
| 1228 | 195.02 | 53.97 | 38.39 | 30.1  | 26.29 |
| 1230 | 195.41 | 54.02 | 38.43 | 30.13 | 26.32 |
| 1232 | 195.93 | 54.1  | 38.49 | 30.18 | 26.36 |
| 1234 | 196.32 | 54.14 | 38.51 | 30.19 | 26.37 |
| 1236 | 196.72 | 54.17 | 38.54 | 30.2  | 26.36 |
| 1238 | 197.12 | 54.2  | 38.57 | 30.22 | 26.38 |
| 1240 | 197.54 | 54.25 | 38.61 | 30.25 | 26.39 |
| 1242 | 198.02 | 54.3  | 38.65 | 30.27 | 26.4  |
| 1244 | 198.43 | 54.37 | 38.7  | 30.3  | 26.43 |
| 1246 | 198.85 | 54.42 | 38.74 | 30.34 | 26.46 |
| 1248 | 199.34 | 54.49 | 38.8  | 30.39 | 26.5  |
| 1250 | 199.78 | 54.55 | 38.85 | 30.41 | 26.51 |
| 1252 | 200.19 | 54.58 | 38.86 | 30.42 | 26.5  |
| 1254 | 200.61 | 54.63 | 38.9  | 30.45 | 26.54 |
| 1256 | 201.01 | 54.66 | 38.9  | 30.45 | 26.51 |
| 1258 | 201.48 | 54.69 | 38.93 | 30.46 | 26.52 |
| 1260 | 201.87 | 54.71 | 38.96 | 30.48 | 26.53 |
| 1262 | 202.27 | 54.77 | 39.01 | 30.51 | 26.56 |
| 1264 | 202.65 | 54.8  | 39.02 | 30.52 | 26.56 |
| 1266 | 203.16 | 54.89 | 39.09 | 30.56 | 26.59 |
| 1268 | 203.59 | 54.94 | 39.11 | 30.59 | 26.61 |
| 1270 | 204.03 | 55    | 39.17 | 30.61 | 26.62 |
| 1272 | 204.44 | 55.05 | 39.2  | 30.63 | 26.64 |
| 1274 | 204.92 | 55.09 | 39.24 | 30.65 | 26.66 |
| 1276 | 205.31 | 55.13 | 39.25 | 30.65 | 26.64 |
| 1278 | 205.73 | 55.2  | 39.31 | 30.69 | 26.68 |
| 1280 | 206.14 | 55.26 | 39.35 | 30.72 | 26.7  |
| 1282 | 206.64 | 55.32 | 39.38 | 30.75 | 26.71 |
| 1284 | 207.06 | 55.37 | 39.42 | 30.76 | 26.73 |

|      |        |       |       |       |       |
|------|--------|-------|-------|-------|-------|
| 1286 | 207.49 | 55.41 | 39.46 | 30.78 | 26.74 |
| 1288 | 207.91 | 55.47 | 39.5  | 30.82 | 26.76 |
| 1290 | 208.4  | 55.53 | 39.55 | 30.85 | 26.78 |
| 1292 | 208.81 | 55.58 | 39.59 | 30.88 | 26.78 |
| 1294 | 209.23 | 55.64 | 39.63 | 30.91 | 26.82 |
| 1296 | 209.65 | 55.69 | 39.67 | 30.94 | 26.84 |
| 1298 | 210.14 | 55.78 | 39.73 | 30.99 | 26.87 |
| 1300 | 210.57 | 55.85 | 39.78 | 31.03 | 26.92 |
| 1302 | 210.99 | 55.91 | 39.82 | 31.06 | 26.93 |
| 1304 | 211.38 | 55.92 | 39.82 | 31.03 | 26.91 |
| 1306 | 211.88 | 55.96 | 39.84 | 31.05 | 26.93 |
| 1308 | 212.29 | 56.01 | 39.88 | 31.06 | 26.93 |
| 1310 | 212.73 | 56.08 | 39.94 | 31.1  | 26.96 |
| 1312 | 213.18 | 56.17 | 40    | 31.16 | 26.99 |
| 1314 | 213.6  | 56.19 | 39.99 | 31.13 | 26.97 |
| 1316 | 214.02 | 56.26 | 40.04 | 31.16 | 27.01 |
| 1318 | 214.48 | 56.33 | 40.1  | 31.2  | 27.03 |
| 1320 | 214.95 | 56.36 | 40.13 | 31.22 | 27.02 |
| 1322 | 215.37 | 56.4  | 40.14 | 31.24 | 27.02 |
| 1324 | 215.8  | 56.46 | 40.19 | 31.27 | 27.04 |
| 1326 | 216.23 | 56.51 | 40.22 | 31.29 | 27.05 |
| 1328 | 216.72 | 56.54 | 40.24 | 31.3  | 27.06 |
| 1330 | 217.14 | 56.64 | 40.31 | 31.35 | 27.09 |
| 1332 | 217.55 | 56.68 | 40.33 | 31.36 | 27.1  |
| 1334 | 217.96 | 56.73 | 40.37 | 31.39 | 27.11 |
| 1336 | 218.34 | 56.75 | 40.37 | 31.37 | 27.09 |
| 1338 | 218.88 | 56.83 | 40.43 | 31.41 | 27.13 |
| 1340 | 219.32 | 56.91 | 40.49 | 31.44 | 27.16 |
| 1342 | 219.75 | 56.96 | 40.52 | 31.47 | 27.17 |
| 1344 | 220.18 | 57.02 | 40.56 | 31.5  | 27.19 |
| 1346 | 220.7  | 57.11 | 40.62 | 31.55 | 27.24 |
| 1348 | 221.06 | 57.13 | 40.62 | 31.53 | 27.21 |
| 1350 | 221.46 | 57.18 | 40.64 | 31.53 | 27.2  |
| 1352 | 221.9  | 57.24 | 40.7  | 31.59 | 27.23 |
| 1354 | 222.4  | 57.29 | 40.73 | 31.6  | 27.22 |
| 1356 | 222.84 | 57.36 | 40.79 | 31.65 | 27.26 |
| 1358 | 223.28 | 57.41 | 40.82 | 31.67 | 27.28 |
| 1360 | 223.73 | 57.49 | 40.86 | 31.7  | 27.29 |
| 1362 | 224.22 | 57.53 | 40.89 | 31.72 | 27.3  |
| 1364 | 224.65 | 57.59 | 40.93 | 31.75 | 27.32 |
| 1366 | 225.08 | 57.64 | 40.96 | 31.77 | 27.33 |
| 1368 | 225.49 | 57.7  | 41    | 31.78 | 27.35 |
| 1370 | 226.01 | 57.79 | 41.05 | 31.81 | 27.37 |
| 1372 | 226.4  | 57.83 | 41.08 | 31.83 | 27.39 |

|      |        |       |       |       |       |
|------|--------|-------|-------|-------|-------|
| 1374 | 226.82 | 57.89 | 41.11 | 31.85 | 27.39 |
| 1376 | 227.26 | 57.94 | 41.15 | 31.87 | 27.41 |
| 1378 | 227.77 | 58.01 | 41.19 | 31.9  | 27.43 |
| 1380 | 228.24 | 58.13 | 41.27 | 31.97 | 27.48 |
| 1382 | 228.63 | 58.17 | 41.3  | 31.98 | 27.49 |
| 1384 | 229.05 | 58.23 | 41.33 | 31.99 | 27.5  |
| 1386 | 229.57 | 58.32 | 41.39 | 32.04 | 27.52 |
| 1388 | 229.98 | 58.38 | 41.42 | 32.06 | 27.51 |
| 1390 | 230.41 | 58.42 | 41.44 | 32.07 | 27.52 |
| 1392 | 230.84 | 58.47 | 41.45 | 32.08 | 27.52 |
| 1394 | 231.35 | 58.55 | 41.49 | 32.1  | 27.55 |
| 1396 | 231.82 | 58.64 | 41.57 | 32.16 | 27.59 |
| 1398 | 232.22 | 58.68 | 41.57 | 32.16 | 27.58 |
| 1400 | 232.66 | 58.77 | 41.65 | 32.22 | 27.62 |
| 1402 | 233.14 | 58.84 | 41.68 | 32.23 | 27.64 |
| 1404 | 233.57 | 58.91 | 41.69 | 32.23 | 27.64 |
| 1406 | 234.01 | 58.98 | 41.74 | 32.26 | 27.66 |
| 1408 | 234.45 | 59.04 | 41.76 | 32.27 | 27.67 |
| 1410 | 234.94 | 59.12 | 41.78 | 32.28 | 27.66 |
| 1412 | 235.38 | 59.19 | 41.82 | 32.3  | 27.68 |
| 1414 | 235.81 | 59.27 | 41.85 | 32.33 | 27.7  |
| 1416 | 236.22 | 59.35 | 41.89 | 32.35 | 27.71 |
| 1418 | 236.67 | 59.47 | 41.95 | 32.4  | 27.75 |
| 1420 | 237.16 | 59.55 | 42    | 32.43 | 27.77 |
| 1422 | 237.6  | 59.61 | 42.03 | 32.44 | 27.75 |
| 1424 | 238.02 | 59.67 | 42.04 | 32.44 | 27.75 |
| 1426 | 238.49 | 59.77 | 42.09 | 32.5  | 27.79 |
| 1428 | 239.01 | 59.88 | 42.14 | 32.52 | 27.81 |
| 1430 | 239.45 | 59.96 | 42.18 | 32.54 | 27.83 |
| 1432 | 239.88 | 60.02 | 42.19 | 32.55 | 27.84 |
| 1434 | 240.4  | 60.15 | 42.24 | 32.59 | 27.85 |
| 1436 | 240.83 | 60.25 | 42.29 | 32.62 | 27.88 |
| 1438 | 241.25 | 60.33 | 42.32 | 32.65 | 27.89 |
| 1440 | 241.69 | 60.43 | 42.35 | 32.67 | 27.91 |
| 1442 | 242.21 | 60.53 | 42.39 | 32.68 | 27.92 |
| 1444 | 242.65 | 60.63 | 42.43 | 32.7  | 27.93 |
| 1446 | 243.09 | 60.74 | 42.47 | 32.72 | 27.96 |
| 1448 | 243.54 | 60.83 | 42.5  | 32.75 | 27.97 |
| 1450 | 244.03 | 60.93 | 42.54 | 32.77 | 27.99 |
| 1452 | 244.45 | 61.05 | 42.56 | 32.79 | 28    |
| 1454 | 244.86 | 61.14 | 42.59 | 32.79 | 27.99 |
| 1456 | 245.33 | 61.26 | 42.65 | 32.84 | 28.03 |
| 1458 | 245.88 | 61.39 | 42.71 | 32.89 | 28.06 |
| 1460 | 246.33 | 61.53 | 42.75 | 32.92 | 28.09 |

|      |        |       |       |       |       |
|------|--------|-------|-------|-------|-------|
| 1462 | 246.77 | 61.62 | 42.77 | 32.93 | 28.09 |
| 1464 | 247.2  | 61.73 | 42.81 | 32.96 | 28.1  |
| 1466 | 247.7  | 61.87 | 42.85 | 32.99 | 28.11 |
| 1468 | 248.14 | 61.98 | 42.9  | 33.03 | 28.14 |
| 1470 | 248.58 | 62.11 | 42.95 | 33.06 | 28.16 |
| 1472 | 248.99 | 62.21 | 42.97 | 33.08 | 28.16 |
| 1474 | 249.48 | 62.29 | 42.98 | 33.08 | 28.17 |
| 1476 | 249.94 | 62.41 | 43.01 | 33.08 | 28.14 |
| 1478 | 250.4  | 62.54 | 43.06 | 33.13 | 28.19 |
| 1480 | 250.86 | 62.67 | 43.11 | 33.17 | 28.22 |
| 1482 | 251.36 | 62.81 | 43.14 | 33.2  | 28.23 |
| 1484 | 251.79 | 62.93 | 43.18 | 33.22 | 28.24 |
| 1486 | 252.21 | 63.03 | 43.22 | 33.25 | 28.27 |
| 1488 | 252.66 | 63.18 | 43.27 | 33.29 | 28.3  |
| 1490 | 253.2  | 63.34 | 43.32 | 33.32 | 28.33 |
| 1492 | 253.64 | 63.45 | 43.35 | 33.35 | 28.35 |
| 1494 | 254.07 | 63.56 | 43.35 | 33.35 | 28.33 |
| 1496 | 254.53 | 63.69 | 43.4  | 33.39 | 28.35 |
| 1498 | 255.05 | 63.82 | 43.45 | 33.42 | 28.37 |
| 1500 | 255.48 | 63.95 | 43.49 | 33.44 | 28.38 |
| 1502 | 255.89 | 64.05 | 43.49 | 33.45 | 28.38 |
| 1504 | 256.32 | 64.19 | 43.53 | 33.48 | 28.42 |
| 1506 | 256.82 | 64.32 | 43.55 | 33.49 | 28.42 |
| 1508 | 257.27 | 64.45 | 43.59 | 33.5  | 28.43 |
| 1510 | 257.72 | 64.57 | 43.64 | 33.55 | 28.46 |
| 1512 | 258.29 | 64.74 | 43.71 | 33.6  | 28.5  |
| 1514 | 258.73 | 64.88 | 43.74 | 33.62 | 28.51 |
| 1516 | 259.15 | 64.99 | 43.75 | 33.63 | 28.51 |
| 1518 | 259.57 | 65.09 | 43.77 | 33.65 | 28.5  |
| 1520 | 259.98 | 65.2  | 43.78 | 33.64 | 28.49 |
| 1522 | 260.52 | 65.34 | 43.83 | 33.7  | 28.53 |
| 1524 | 260.97 | 65.51 | 43.9  | 33.75 | 28.56 |
| 1526 | 261.44 | 65.66 | 43.93 | 33.79 | 28.6  |
| 1528 | 261.9  | 65.8  | 43.98 | 33.83 | 28.62 |
| 1530 | 262.33 | 65.93 | 44.01 | 33.84 | 28.62 |
| 1532 | 262.81 | 66.03 | 44.01 | 33.84 | 28.61 |
| 1534 | 263.25 | 66.18 | 44.04 | 33.86 | 28.64 |
| 1536 | 263.67 | 66.3  | 44.07 | 33.88 | 28.65 |
| 1538 | 264.16 | 66.44 | 44.09 | 33.89 | 28.65 |
| 1540 | 264.62 | 66.58 | 44.14 | 33.92 | 28.68 |
| 1542 | 265.07 | 66.71 | 44.16 | 33.93 | 28.68 |
| 1544 | 265.52 | 66.84 | 44.2  | 33.95 | 28.7  |
| 1546 | 266.06 | 66.99 | 44.24 | 33.99 | 28.72 |
| 1548 | 266.5  | 67.16 | 44.28 | 34.01 | 28.73 |

|      |        |       |       |       |       |
|------|--------|-------|-------|-------|-------|
| 1550 | 266.93 | 67.29 | 44.31 | 34.03 | 28.75 |
| 1552 | 267.37 | 67.46 | 44.37 | 34.09 | 28.79 |
| 1554 | 267.86 | 67.6  | 44.38 | 34.09 | 28.78 |
| 1556 | 268.32 | 67.75 | 44.44 | 34.15 | 28.82 |
| 1558 | 268.79 | 67.9  | 44.47 | 34.18 | 28.84 |
| 1560 | 269.31 | 68.02 | 44.5  | 34.19 | 28.84 |
| 1562 | 269.75 | 68.18 | 44.51 | 34.2  | 28.85 |
| 1564 | 270.21 | 68.34 | 44.56 | 34.25 | 28.87 |
| 1566 | 270.7  | 68.5  | 44.6  | 34.27 | 28.9  |
| 1568 | 271.11 | 68.63 | 44.63 | 34.29 | 28.91 |
| 1570 | 271.6  | 68.79 | 44.66 | 34.3  | 28.92 |
| 1572 | 272.01 | 68.93 | 44.68 | 34.32 | 28.92 |
| 1574 | 272.44 | 69.06 | 44.69 | 34.32 | 28.92 |
| 1576 | 272.9  | 69.23 | 44.74 | 34.35 | 28.95 |
| 1578 | 273.44 | 69.38 | 44.76 | 34.38 | 28.96 |
| 1580 | 273.89 | 69.55 | 44.8  | 34.41 | 28.98 |
| 1582 | 274.32 | 69.71 | 44.83 | 34.43 | 28.99 |
| 1584 | 274.73 | 69.82 | 44.83 | 34.42 | 28.98 |
| 1586 | 275.24 | 70.01 | 44.85 | 34.43 | 28.98 |
| 1588 | 275.71 | 70.19 | 44.94 | 34.5  | 29.04 |
| 1590 | 276.15 | 70.36 | 44.97 | 34.53 | 29.07 |
| 1592 | 276.6  | 70.53 | 45.01 | 34.56 | 29.11 |
| 1594 | 277.07 | 70.7  | 45.06 | 34.6  | 29.12 |
| 1596 | 277.59 | 70.87 | 45.08 | 34.62 | 29.14 |
| 1598 | 278.04 | 71.03 | 45.11 | 34.63 | 29.16 |
| 1600 | 278.49 | 71.23 | 45.17 | 34.67 | 29.18 |
| 1602 | 279    | 71.41 | 45.22 | 34.71 | 29.22 |
| 1604 | 279.39 | 71.57 | 45.23 | 34.72 | 29.22 |
| 1606 | 279.83 | 71.73 | 45.25 | 34.73 | 29.22 |
| 1608 | 280.32 | 71.93 | 45.3  | 34.77 | 29.26 |
| 1610 | 280.83 | 72.1  | 45.32 | 34.78 | 29.27 |
| 1612 | 281.3  | 72.28 | 45.37 | 34.83 | 29.3  |
| 1614 | 281.75 | 72.46 | 45.43 | 34.88 | 29.33 |
| 1616 | 282.19 | 72.63 | 45.47 | 34.9  | 29.34 |
| 1618 | 282.68 | 72.76 | 45.47 | 34.89 | 29.33 |
| 1620 | 283.1  | 72.97 | 45.51 | 34.93 | 29.34 |
| 1622 | 283.5  | 73.11 | 45.52 | 34.93 | 29.36 |
| 1624 | 283.95 | 73.3  | 45.56 | 34.98 | 29.37 |
| 1626 | 284.49 | 73.51 | 45.62 | 35.03 | 29.42 |
| 1628 | 284.88 | 73.68 | 45.64 | 35.05 | 29.43 |
| 1630 | 285.4  | 73.88 | 45.68 | 35.06 | 29.44 |
| 1632 | 285.93 | 74.06 | 45.71 | 35.07 | 29.45 |
| 1634 | 286.36 | 74.26 | 45.74 | 35.1  | 29.47 |
| 1636 | 286.78 | 74.43 | 45.76 | 35.11 | 29.49 |



|      |        |       |       |       |       |
|------|--------|-------|-------|-------|-------|
| 1638 | 287.18 | 74.58 | 45.76 | 35.1  | 29.46 |
| 1640 | 287.59 | 74.75 | 45.78 | 35.12 | 29.47 |
| 1642 | 288.1  | 74.96 | 45.82 | 35.14 | 29.49 |
| 1644 | 288.55 | 75.14 | 45.86 | 35.17 | 29.51 |
| 1646 | 289.01 | 75.33 | 45.9  | 35.2  | 29.53 |
| 1648 | 289.47 | 75.52 | 45.93 | 35.23 | 29.53 |
| 1650 | 290.02 | 75.77 | 45.99 | 35.3  | 29.59 |
| 1652 | 290.46 | 75.95 | 46.03 | 35.32 | 29.62 |
| 1654 | 290.87 | 76.12 | 46.05 | 35.33 | 29.62 |
| 1656 | 291.27 | 76.28 | 46.07 | 35.34 | 29.61 |
| 1658 | 291.78 | 76.49 | 46.12 | 35.39 | 29.63 |
| 1660 | 292.2  | 76.7  | 46.13 | 35.39 | 29.63 |
| 1662 | 292.63 | 76.88 | 46.15 | 35.41 | 29.65 |
| 1664 | 293.08 | 77.07 | 46.18 | 35.43 | 29.66 |
| 1666 | 293.58 | 77.25 | 46.19 | 35.43 | 29.66 |
| 1668 | 294.03 | 77.47 | 46.25 | 35.46 | 29.69 |
| 1670 | 294.45 | 77.67 | 46.28 | 35.5  | 29.7  |
| 1672 | 294.94 | 77.86 | 46.31 | 35.52 | 29.72 |
| 1674 | 295.34 | 78.09 | 46.33 | 35.54 | 29.73 |
| 1676 | 295.77 | 78.28 | 46.38 | 35.56 | 29.75 |
| 1678 | 296.22 | 78.48 | 46.4  | 35.58 | 29.76 |
| 1680 | 296.76 | 78.69 | 46.44 | 35.61 | 29.78 |
| 1682 | 297.21 | 78.93 | 46.49 | 35.64 | 29.8  |
| 1684 | 297.65 | 79.13 | 46.52 | 35.69 | 29.83 |
| 1686 | 298.08 | 79.32 | 46.55 | 35.71 | 29.84 |
| 1688 | 298.5  | 79.53 | 46.59 | 35.74 | 29.87 |
| 1690 | 298.98 | 79.71 | 46.6  | 35.75 | 29.86 |
| 1692 | 299.42 | 79.98 | 46.66 | 35.8  | 29.91 |
| 1694 | 299.82 | 80.17 | 46.68 | 35.81 | 29.92 |
| 1696 | 300.26 | 80.38 | 46.71 | 35.84 | 29.93 |
| 1698 | 300.82 | 80.64 | 46.77 | 35.89 | 29.98 |
| 1700 | 301.23 | 80.81 | 46.76 | 35.87 | 29.95 |
| 1702 | 301.7  | 81.07 | 46.83 | 35.94 | 30.01 |
| 1704 | 302.12 | 81.28 | 46.87 | 35.97 | 30.02 |
| 1706 | 302.6  | 81.52 | 46.9  | 35.98 | 30.03 |
| 1708 | 302.97 | 81.71 | 46.91 | 35.98 | 30.02 |
| 1710 | 303.38 | 81.9  | 46.92 | 35.98 | 30.03 |
| 1712 | 303.8  | 82.08 | 46.92 | 35.98 | 30.03 |
| 1714 | 304.33 | 82.31 | 46.96 | 36.01 | 30.06 |
| 1716 | 304.79 | 82.59 | 47.02 | 36.05 | 30.08 |
| 1718 | 305.21 | 82.79 | 47.03 | 36.07 | 30.08 |
| 1720 | 305.64 | 83    | 47.06 | 36.1  | 30.1  |
| 1722 | 306.15 | 83.28 | 47.11 | 36.15 | 30.15 |
| 1724 | 306.54 | 83.5  | 47.14 | 36.18 | 30.15 |

|      |        |       |       |       |       |
|------|--------|-------|-------|-------|-------|
| 1726 | 306.97 | 83.73 | 47.19 | 36.24 | 30.2  |
| 1728 | 307.44 | 83.93 | 47.21 | 36.24 | 30.19 |
| 1730 | 307.9  | 84.2  | 47.25 | 36.27 | 30.21 |
| 1732 | 308.31 | 84.41 | 47.25 | 36.27 | 30.21 |
| 1734 | 308.76 | 84.62 | 47.28 | 36.29 | 30.22 |
| 1736 | 309.17 | 84.84 | 47.3  | 36.31 | 30.23 |
| 1738 | 309.64 | 85.12 | 47.34 | 36.33 | 30.26 |
| 1740 | 310.03 | 85.33 | 47.34 | 36.34 | 30.26 |
| 1742 | 310.45 | 85.59 | 47.39 | 36.37 | 30.29 |
| 1744 | 310.84 | 85.78 | 47.4  | 36.38 | 30.29 |
| 1746 | 311.36 | 86.02 | 47.45 | 36.43 | 30.34 |
| 1748 | 311.77 | 86.28 | 47.47 | 36.44 | 30.33 |
| 1750 | 312.21 | 86.51 | 47.49 | 36.46 | 30.34 |
| 1752 | 312.73 | 86.75 | 47.54 | 36.51 | 30.39 |
| 1754 | 313.14 | 87.02 | 47.55 | 36.51 | 30.37 |
| 1756 | 313.55 | 87.24 | 47.58 | 36.55 | 30.37 |
| 1758 | 313.96 | 87.48 | 47.62 | 36.57 | 30.39 |
| 1760 | 314.36 | 87.71 | 47.65 | 36.6  | 30.41 |
| 1762 | 314.82 | 87.99 | 47.68 | 36.61 | 30.42 |
| 1764 | 315.24 | 88.24 | 47.71 | 36.66 | 30.44 |
| 1766 | 315.69 | 88.49 | 47.74 | 36.68 | 30.47 |
| 1768 | 316.09 | 88.72 | 47.76 | 36.69 | 30.47 |
| 1770 | 316.59 | 89    | 47.79 | 36.71 | 30.48 |
| 1772 | 317.01 | 89.26 | 47.83 | 36.75 | 30.51 |
| 1774 | 317.39 | 89.49 | 47.85 | 36.75 | 30.51 |
| 1776 | 317.77 | 89.72 | 47.85 | 36.76 | 30.52 |
| 1778 | 318.25 | 90.03 | 47.92 | 36.82 | 30.57 |
| 1780 | 318.66 | 90.26 | 47.93 | 36.83 | 30.56 |
| 1782 | 319.09 | 90.5  | 47.96 | 36.86 | 30.59 |
| 1784 | 319.54 | 90.78 | 48.01 | 36.9  | 30.63 |
| 1786 | 319.99 | 91    | 48    | 36.89 | 30.6  |
| 1788 | 320.42 | 91.28 | 48.03 | 36.9  | 30.62 |
| 1790 | 320.83 | 91.54 | 48.05 | 36.92 | 30.63 |
| 1792 | 321.21 | 91.77 | 48.07 | 36.95 | 30.64 |
| 1794 | 321.68 | 92.09 | 48.12 | 36.98 | 30.66 |
| 1796 | 322.05 | 92.32 | 48.14 | 37    | 30.66 |
| 1798 | 322.49 | 92.62 | 48.2  | 37.07 | 30.71 |
| 1800 | 322.97 | 92.86 | 48.2  | 37.07 | 30.7  |
| 1802 | 323.4  | 93.15 | 48.22 | 37.09 | 30.7  |
| 1804 | 323.85 | 93.4  | 48.25 | 37.11 | 30.71 |
| 1806 | 324.27 | 93.67 | 48.3  | 37.15 | 30.75 |
| 1808 | 324.69 | 93.92 | 48.32 | 37.17 | 30.75 |
| 1810 | 325.13 | 94.22 | 48.34 | 37.19 | 30.76 |
| 1812 | 325.51 | 94.49 | 48.39 | 37.22 | 30.78 |

|      |        |        |       |       |       |
|------|--------|--------|-------|-------|-------|
| 1814 | 325.88 | 94.75  | 48.4  | 37.23 | 30.78 |
| 1816 | 326.3  | 95.02  | 48.42 | 37.25 | 30.79 |
| 1818 | 326.81 | 95.28  | 48.45 | 37.28 | 30.8  |
| 1820 | 327.23 | 95.58  | 48.47 | 37.29 | 30.82 |
| 1822 | 327.67 | 95.87  | 48.51 | 37.31 | 30.83 |
| 1824 | 328.06 | 96.13  | 48.53 | 37.33 | 30.85 |
| 1826 | 328.5  | 96.43  | 48.55 | 37.35 | 30.86 |
| 1828 | 328.88 | 96.72  | 48.57 | 37.38 | 30.87 |
| 1830 | 329.26 | 96.99  | 48.6  | 37.41 | 30.89 |
| 1832 | 329.66 | 97.26  | 48.64 | 37.44 | 30.9  |
| 1834 | 330.15 | 97.54  | 48.66 | 37.45 | 30.91 |
| 1836 | 330.58 | 97.86  | 48.69 | 37.48 | 30.93 |
| 1838 | 331.01 | 98.13  | 48.71 | 37.51 | 30.94 |
| 1840 | 331.41 | 98.4   | 48.74 | 37.54 | 30.96 |
| 1842 | 331.83 | 98.64  | 48.73 | 37.53 | 30.93 |
| 1844 | 332.24 | 98.99  | 48.8  | 37.57 | 30.97 |
| 1846 | 332.64 | 99.28  | 48.83 | 37.62 | 31    |
| 1848 | 333.07 | 99.56  | 48.86 | 37.64 | 31.01 |
| 1850 | 333.48 | 99.93  | 48.9  | 37.69 | 31.04 |
| 1852 | 333.9  | 100.21 | 48.92 | 37.71 | 31.05 |
| 1854 | 334.31 | 100.47 | 48.93 | 37.72 | 31.04 |
| 1856 | 334.81 | 100.75 | 48.96 | 37.75 | 31.07 |
| 1858 | 335.2  | 101.04 | 49    | 37.78 | 31.08 |
| 1860 | 335.58 | 101.35 | 49.01 | 37.79 | 31.09 |
| 1862 | 335.95 | 101.65 | 49.04 | 37.82 | 31.11 |
| 1864 | 336.32 | 101.94 | 49.06 | 37.85 | 31.14 |
| 1866 | 336.8  | 102.31 | 49.13 | 37.9  | 31.19 |
| 1868 | 337.18 | 102.58 | 49.12 | 37.88 | 31.16 |
| 1870 | 337.59 | 102.87 | 49.14 | 37.9  | 31.17 |
| 1872 | 338.02 | 103.17 | 49.18 | 37.93 | 31.2  |
| 1874 | 338.49 | 103.51 | 49.21 | 37.97 | 31.23 |
| 1876 | 338.89 | 103.81 | 49.25 | 38    | 31.24 |
| 1878 | 339.23 | 104.08 | 49.25 | 38.01 | 31.25 |
| 1880 | 339.59 | 104.37 | 49.27 | 38.02 | 31.25 |
| 1882 | 340.02 | 104.72 | 49.27 | 38.03 | 31.26 |
| 1884 | 340.41 | 105    | 49.29 | 38.04 | 31.27 |
| 1886 | 340.83 | 105.3  | 49.32 | 38.05 | 31.28 |
| 1888 | 341.26 | 105.6  | 49.34 | 38.08 | 31.29 |
| 1890 | 341.77 | 105.98 | 49.37 | 38.12 | 31.33 |
| 1892 | 342.15 | 106.27 | 49.4  | 38.14 | 31.33 |
| 1894 | 342.52 | 106.56 | 49.42 | 38.17 | 31.34 |
| 1896 | 342.9  | 106.86 | 49.44 | 38.2  | 31.36 |
| 1898 | 343.32 | 107.21 | 49.47 | 38.22 | 31.38 |
| 1900 | 343.68 | 107.51 | 49.49 | 38.24 | 31.4  |

|      |        |        |       |       |       |
|------|--------|--------|-------|-------|-------|
| 1902 | 344.08 | 107.84 | 49.53 | 38.3  | 31.44 |
| 1904 | 344.46 | 108.12 | 49.53 | 38.3  | 31.42 |
| 1906 | 344.94 | 108.48 | 49.55 | 38.31 | 31.44 |
| 1908 | 345.36 | 108.81 | 49.6  | 38.35 | 31.47 |
| 1910 | 345.76 | 109.14 | 49.62 | 38.39 | 31.51 |
| 1912 | 346.11 | 109.46 | 49.65 | 38.42 | 31.53 |
| 1914 | 346.5  | 109.77 | 49.63 | 38.39 | 31.51 |
| 1916 | 346.86 | 110.1  | 49.66 | 38.42 | 31.52 |
| 1918 | 347.26 | 110.41 | 49.69 | 38.45 | 31.54 |
| 1920 | 347.68 | 110.74 | 49.73 | 38.49 | 31.58 |
| 1922 | 348.15 | 111.05 | 49.76 | 38.51 | 31.6  |
| 1924 | 348.55 | 111.42 | 49.78 | 38.53 | 31.62 |
| 1926 | 348.95 | 111.75 | 49.8  | 38.56 | 31.62 |
| 1928 | 349.33 | 112.07 | 49.84 | 38.6  | 31.66 |
| 1930 | 349.74 | 112.41 | 49.84 | 38.61 | 31.64 |
| 1932 | 350.09 | 112.72 | 49.87 | 38.64 | 31.67 |
| 1934 | 350.41 | 112.99 | 49.85 | 38.62 | 31.64 |
| 1936 | 350.79 | 113.34 | 49.89 | 38.66 | 31.67 |
| 1938 | 351.16 | 113.64 | 49.87 | 38.66 | 31.66 |
| 1940 | 351.63 | 114    | 49.89 | 38.67 | 31.68 |
| 1942 | 352.02 | 114.32 | 49.91 | 38.69 | 31.69 |
| 1944 | 352.44 | 114.69 | 49.97 | 38.74 | 31.73 |
| 1946 | 352.83 | 115    | 49.98 | 38.75 | 31.73 |
| 1948 | 353.15 | 115.35 | 49.96 | 38.74 | 31.72 |
| 1950 | 353.51 | 115.7  | 50    | 38.78 | 31.75 |
| 1952 | 353.97 | 116.05 | 50.05 | 38.84 | 31.8  |
| 1954 | 354.38 | 116.44 | 50.09 | 38.86 | 31.81 |
| 1956 | 354.77 | 116.74 | 50.09 | 38.86 | 31.8  |
| 1958 | 355.17 | 117.06 | 50.11 | 38.9  | 31.82 |
| 1960 | 355.59 | 117.41 | 50.15 | 38.93 | 31.84 |
| 1962 | 356    | 117.75 | 50.17 | 38.96 | 31.85 |
| 1964 | 356.37 | 118.13 | 50.18 | 38.98 | 31.87 |
| 1966 | 356.7  | 118.46 | 50.2  | 39    | 31.89 |
| 1968 | 357.05 | 118.79 | 50.22 | 39.02 | 31.9  |
| 1970 | 357.47 | 119.18 | 50.24 | 39.04 | 31.92 |
| 1972 | 357.86 | 119.51 | 50.26 | 39.06 | 31.92 |
| 1974 | 358.24 | 119.82 | 50.26 | 39.06 | 31.93 |
| 1976 | 358.64 | 120.16 | 50.28 | 39.08 | 31.94 |
| 1978 | 359.1  | 120.52 | 50.31 | 39.12 | 31.97 |
| 1980 | 359.43 | 120.88 | 50.32 | 39.13 | 31.97 |
| 1982 | 359.77 | 121.24 | 50.35 | 39.16 | 32    |
| 1984 | 360.1  | 121.58 | 50.37 | 39.18 | 32    |
| 1986 | 360.44 | 121.92 | 50.39 | 39.2  | 32.01 |
| 1988 | 360.88 | 122.29 | 50.4  | 39.21 | 32.02 |

|      |        |        |       |       |       |
|------|--------|--------|-------|-------|-------|
| 1990 | 361.28 | 122.64 | 50.43 | 39.24 | 32.03 |
| 1992 | 361.69 | 122.98 | 50.45 | 39.27 | 32.05 |
| 1994 | 362.14 | 123.37 | 50.46 | 39.27 | 32.04 |
| 1996 | 362.51 | 123.71 | 50.48 | 39.3  | 32.07 |
| 1998 | 362.86 | 124.07 | 50.5  | 39.32 | 32.09 |
| 2000 | 363.17 | 124.4  | 50.49 | 39.31 | 32.06 |
| 2002 | 363.54 | 124.74 | 50.5  | 39.33 | 32.06 |
| 2004 | 363.92 | 125.16 | 50.56 | 39.38 | 32.1  |
| 2006 | 364.3  | 125.51 | 50.57 | 39.41 | 32.12 |
| 2008 | 364.7  | 125.87 | 50.61 | 39.45 | 32.15 |
| 2010 | 365.18 | 126.28 | 50.64 | 39.5  | 32.18 |
| 2012 | 365.54 | 126.61 | 50.65 | 39.49 | 32.16 |
| 2014 | 365.89 | 126.95 | 50.65 | 39.5  | 32.16 |
| 2016 | 366.22 | 127.29 | 50.68 | 39.52 | 32.18 |
| 2018 | 366.57 | 127.66 | 50.68 | 39.51 | 32.17 |
| 2020 | 366.92 | 128.03 | 50.71 | 39.55 | 32.19 |
| 2022 | 367.29 | 128.39 | 50.75 | 39.58 | 32.21 |
| 2024 | 367.67 | 128.74 | 50.76 | 39.59 | 32.22 |
| 2026 | 368.13 | 129.09 | 50.76 | 39.6  | 32.23 |
| 2028 | 368.5  | 129.5  | 50.79 | 39.61 | 32.24 |
| 2030 | 368.88 | 129.87 | 50.81 | 39.65 | 32.26 |
| 2032 | 369.21 | 130.21 | 50.82 | 39.66 | 32.27 |
| 2034 | 369.58 | 130.64 | 50.84 | 39.69 | 32.28 |
| 2036 | 369.89 | 130.98 | 50.86 | 39.71 | 32.29 |
| 2038 | 370.23 | 131.32 | 50.88 | 39.73 | 32.31 |
| 2040 | 370.61 | 131.67 | 50.89 | 39.75 | 32.32 |
| 2042 | 371.07 | 132.03 | 50.92 | 39.78 | 32.33 |
| 2044 | 371.46 | 132.46 | 50.94 | 39.81 | 32.34 |
| 2046 | 371.84 | 132.84 | 50.97 | 39.85 | 32.38 |
| 2048 | 372.18 | 133.18 | 50.98 | 39.85 | 32.38 |
| 2050 | 372.56 | 133.53 | 51    | 39.86 | 32.38 |
| 2052 | 372.88 | 133.94 | 51.03 | 39.88 | 32.39 |
| 2054 | 373.19 | 134.3  | 51.05 | 39.9  | 32.39 |
| 2056 | 373.53 | 134.66 | 51.05 | 39.91 | 32.41 |
| 2058 | 373.97 | 135.07 | 51.06 | 39.92 | 32.42 |
| 2060 | 374.36 | 135.42 | 51.08 | 39.93 | 32.43 |
| 2062 | 374.72 | 135.78 | 51.08 | 39.95 | 32.43 |
| 2064 | 375.11 | 136.16 | 51.12 | 39.98 | 32.44 |
| 2066 | 375.5  | 136.51 | 51.14 | 40    | 32.46 |
| 2068 | 375.8  | 136.92 | 51.15 | 40.02 | 32.46 |
| 2070 | 376.11 | 137.29 | 51.16 | 40.03 | 32.47 |
| 2072 | 376.42 | 137.63 | 51.17 | 40.05 | 32.47 |
| 2074 | 376.84 | 138.07 | 51.18 | 40.07 | 32.47 |
| 2076 | 377.23 | 138.43 | 51.21 | 40.1  | 32.49 |

|      |        |        |       |       |       |
|------|--------|--------|-------|-------|-------|
| 2078 | 377.57 | 138.76 | 51.19 | 40.09 | 32.46 |
| 2080 | 377.94 | 139.12 | 51.21 | 40.1  | 32.47 |
| 2082 | 378.32 | 139.49 | 51.25 | 40.13 | 32.49 |
| 2084 | 378.7  | 139.9  | 51.25 | 40.16 | 32.49 |
| 2086 | 379.05 | 140.29 | 51.31 | 40.21 | 32.55 |
| 2088 | 379.33 | 140.65 | 51.31 | 40.21 | 32.54 |
| 2090 | 379.7  | 141.04 | 51.35 | 40.25 | 32.57 |
| 2092 | 380.07 | 141.48 | 51.37 | 40.26 | 32.58 |
| 2094 | 380.45 | 141.85 | 51.39 | 40.28 | 32.58 |
| 2096 | 380.82 | 142.21 | 51.41 | 40.3  | 32.59 |
| 2098 | 381.24 | 142.64 | 51.42 | 40.32 | 32.61 |
| 2100 | 381.59 | 143.01 | 51.44 | 40.33 | 32.61 |
| 2102 | 381.87 | 143.36 | 51.43 | 40.32 | 32.61 |
| 2104 | 382.13 | 143.71 | 51.41 | 40.3  | 32.6  |
| 2106 | 382.49 | 144.07 | 51.43 | 40.33 | 32.61 |
| 2108 | 382.85 | 144.48 | 51.45 | 40.35 | 32.62 |
| 2110 | 383.23 | 144.85 | 51.47 | 40.37 | 32.63 |
| 2112 | 383.63 | 145.26 | 51.53 | 40.43 | 32.68 |
| 2114 | 384.09 | 145.72 | 51.56 | 40.47 | 32.7  |
| 2116 | 384.42 | 146.07 | 51.57 | 40.48 | 32.7  |
| 2118 | 384.75 | 146.45 | 51.6  | 40.51 | 32.71 |
| 2120 | 385.07 | 146.84 | 51.62 | 40.55 | 32.74 |
| 2122 | 385.38 | 147.22 | 51.66 | 40.58 | 32.75 |
| 2124 | 385.72 | 147.63 | 51.66 | 40.59 | 32.75 |
| 2126 | 386.07 | 148.01 | 51.69 | 40.62 | 32.79 |
| 2128 | 386.44 | 148.37 | 51.69 | 40.62 | 32.78 |
| 2130 | 386.87 | 148.75 | 51.71 | 40.64 | 32.79 |
| 2132 | 387.26 | 149.21 | 51.77 | 40.68 | 32.83 |
| 2134 | 387.6  | 149.59 | 51.78 | 40.7  | 32.83 |
| 2136 | 387.9  | 149.94 | 51.76 | 40.69 | 32.83 |
| 2138 | 388.24 | 150.35 | 51.78 | 40.7  | 32.83 |
| 2140 | 388.54 | 150.73 | 51.8  | 40.75 | 32.87 |
| 2142 | 388.84 | 151.1  | 51.81 | 40.74 | 32.86 |
| 2144 | 389.19 | 151.48 | 51.83 | 40.76 | 32.89 |
| 2146 | 389.63 | 151.84 | 51.83 | 40.76 | 32.88 |
| 2148 | 390    | 152.27 | 51.84 | 40.77 | 32.89 |
| 2150 | 390.36 | 152.66 | 51.87 | 40.82 | 32.93 |
| 2152 | 390.68 | 153.02 | 51.88 | 40.81 | 32.91 |
| 2154 | 391.04 | 153.4  | 51.89 | 40.84 | 32.92 |
| 2156 | 391.31 | 153.84 | 51.91 | 40.86 | 32.93 |
| 2158 | 391.6  | 154.22 | 51.93 | 40.88 | 32.94 |
| 2160 | 391.94 | 154.6  | 51.94 | 40.89 | 32.96 |
| 2162 | 392.3  | 154.96 | 51.96 | 40.92 | 32.96 |
| 2164 | 392.74 | 155.39 | 51.98 | 40.93 | 32.97 |

|      |        |        |       |       |       |
|------|--------|--------|-------|-------|-------|
| 2166 | 393.12 | 155.76 | 52    | 40.95 | 32.98 |
| 2168 | 393.45 | 156.11 | 51.99 | 40.95 | 32.97 |
| 2170 | 393.85 | 156.5  | 52.03 | 40.99 | 33.01 |
| 2172 | 394.15 | 156.95 | 52.06 | 41.02 | 33.04 |
| 2174 | 394.43 | 157.31 | 52.06 | 41.03 | 33.03 |
| 2176 | 394.71 | 157.67 | 52.07 | 41.04 | 33.04 |
| 2178 | 395.12 | 158.12 | 52.1  | 41.06 | 33.06 |
| 2180 | 395.5  | 158.49 | 52.12 | 41.08 | 33.06 |
| 2182 | 395.88 | 158.86 | 52.13 | 41.1  | 33.08 |
| 2184 | 396.26 | 159.24 | 52.17 | 41.14 | 33.12 |
| 2186 | 396.6  | 159.61 | 52.17 | 41.14 | 33.11 |
| 2188 | 396.95 | 160.04 | 52.19 | 41.15 | 33.11 |
| 2190 | 397.24 | 160.43 | 52.21 | 41.18 | 33.13 |
| 2192 | 397.5  | 160.81 | 52.24 | 41.21 | 33.17 |
| 2194 | 397.85 | 161.17 | 52.24 | 41.2  | 33.15 |
| 2196 | 398.22 | 161.61 | 52.27 | 41.22 | 33.17 |
| 2198 | 398.6  | 162    | 52.3  | 41.26 | 33.2  |
| 2200 | 398.97 | 162.36 | 52.31 | 41.26 | 33.2  |
| 2202 | 399.37 | 162.81 | 52.33 | 41.28 | 33.21 |
| 2204 | 399.69 | 163.18 | 52.36 | 41.3  | 33.24 |
| 2206 | 399.96 | 163.53 | 52.36 | 41.31 | 33.24 |
| 2208 | 400.26 | 163.92 | 52.4  | 41.35 | 33.27 |
| 2210 | 400.58 | 164.27 | 52.4  | 41.35 | 33.26 |
| 2212 | 400.91 | 164.69 | 52.41 | 41.36 | 33.25 |
| 2214 | 401.28 | 165.08 | 52.45 | 41.39 | 33.27 |
| 2216 | 401.63 | 165.44 | 52.45 | 41.4  | 33.28 |
| 2218 | 402    | 165.84 | 52.49 | 41.44 | 33.32 |
| 2220 | 402.36 | 166.26 | 52.49 | 41.44 | 33.3  |
| 2222 | 402.66 | 166.63 | 52.51 | 41.46 | 33.32 |
| 2224 | 402.97 | 167.02 | 52.55 | 41.49 | 33.33 |
| 2226 | 403.25 | 167.38 | 52.56 | 41.51 | 33.34 |
| 2228 | 403.64 | 167.84 | 52.59 | 41.55 | 33.37 |
| 2230 | 403.98 | 168.21 | 52.61 | 41.56 | 33.36 |
| 2232 | 404.37 | 168.61 | 52.65 | 41.59 | 33.4  |
| 2234 | 404.78 | 169    | 52.69 | 41.62 | 33.43 |
| 2236 | 405.08 | 169.43 | 52.71 | 41.63 | 33.43 |
| 2238 | 405.35 | 169.8  | 52.72 | 41.64 | 33.43 |
| 2240 | 405.63 | 170.17 | 52.75 | 41.66 | 33.45 |
| 2242 | 405.96 | 170.59 | 52.75 | 41.65 | 33.45 |
| 2244 | 406.31 | 171.01 | 52.81 | 41.71 | 33.48 |
| 2246 | 406.65 | 171.37 | 52.81 | 41.72 | 33.5  |
| 2248 | 407.03 | 171.77 | 52.87 | 41.76 | 33.54 |
| 2250 | 407.39 | 172.15 | 52.88 | 41.77 | 33.54 |
| 2252 | 407.68 | 172.57 | 52.87 | 41.74 | 33.52 |

|      |        |        |       |       |       |
|------|--------|--------|-------|-------|-------|
| 2254 | 408    | 172.99 | 52.94 | 41.79 | 33.57 |
| 2256 | 408.27 | 173.37 | 52.96 | 41.82 | 33.59 |
| 2258 | 408.58 | 173.77 | 52.96 | 41.8  | 33.59 |
| 2260 | 408.9  | 174.11 | 52.96 | 41.78 | 33.57 |
| 2262 | 409.26 | 174.48 | 52.98 | 41.8  | 33.58 |
| 2264 | 409.62 | 174.87 | 53.01 | 41.83 | 33.61 |
| 2266 | 409.96 | 175.26 | 53.06 | 41.86 | 33.65 |
| 2268 | 410.31 | 175.73 | 53.11 | 41.91 | 33.69 |
| 2270 | 410.6  | 176.1  | 53.12 | 41.92 | 33.7  |
| 2272 | 410.83 | 176.44 | 53.11 | 41.9  | 33.66 |
| 2274 | 411.24 | 176.85 | 53.19 | 41.96 | 33.72 |
| 2276 | 411.56 | 177.25 | 53.19 | 41.96 | 33.71 |
| 2278 | 411.91 | 177.62 | 53.2  | 41.95 | 33.71 |
| 2280 | 412.25 | 177.99 | 53.23 | 41.96 | 33.72 |
| 2282 | 412.59 | 178.44 | 53.26 | 41.98 | 33.73 |
| 2284 | 412.89 | 178.84 | 53.31 | 42.03 | 33.79 |
| 2286 | 413.14 | 179.19 | 53.31 | 42.02 | 33.77 |
| 2288 | 413.48 | 179.61 | 53.39 | 42.08 | 33.82 |
| 2290 | 413.83 | 180    | 53.43 | 42.12 | 33.85 |
| 2292 | 414.23 | 180.42 | 53.45 | 42.11 | 33.84 |
| 2294 | 414.54 | 180.76 | 53.46 | 42.12 | 33.85 |
| 2296 | 414.85 | 181.12 | 53.47 | 42.12 | 33.84 |
| 2298 | 415.2  | 181.48 | 53.5  | 42.14 | 33.85 |
| 2300 | 415.48 | 181.94 | 53.55 | 42.17 | 33.87 |
| 2302 | 415.77 | 182.31 | 53.58 | 42.19 | 33.88 |
| 2304 | 416.07 | 182.69 | 53.6  | 42.2  | 33.9  |
| 2306 | 416.51 | 183.15 | 53.65 | 42.22 | 33.92 |
| 2308 | 416.86 | 183.5  | 53.67 | 42.22 | 33.91 |
| 2310 | 417.22 | 183.87 | 53.71 | 42.24 | 33.93 |
| 2312 | 417.55 | 184.25 | 53.74 | 42.24 | 33.95 |
| 2314 | 417.87 | 184.63 | 53.77 | 42.25 | 33.97 |
| 2316 | 418.14 | 185.07 | 53.79 | 42.27 | 33.99 |
| 2318 | 418.42 | 185.45 | 53.83 | 42.3  | 33.99 |
| 2320 | 418.76 | 185.84 | 53.87 | 42.32 | 34.01 |
| 2322 | 419.12 | 186.21 | 53.91 | 42.34 | 34.02 |
| 2324 | 419.56 | 186.65 | 53.95 | 42.36 | 34.04 |
| 2326 | 419.93 | 187.05 | 53.99 | 42.4  | 34.06 |
| 2328 | 420.25 | 187.42 | 54.02 | 42.42 | 34.07 |
| 2330 | 420.58 | 187.78 | 54.07 | 42.44 | 34.07 |
| 2332 | 420.88 | 188.22 | 54.11 | 42.46 | 34.09 |
| 2334 | 421.19 | 188.65 | 54.19 | 42.52 | 34.14 |
| 2336 | 421.5  | 189.04 | 54.22 | 42.55 | 34.18 |
| 2338 | 421.95 | 189.48 | 54.26 | 42.57 | 34.2  |
| 2340 | 422.35 | 189.86 | 54.3  | 42.59 | 34.21 |



|      |        |        |       |       |       |
|------|--------|--------|-------|-------|-------|
| 2342 | 422.74 | 190.24 | 54.34 | 42.61 | 34.22 |
| 2344 | 423.09 | 190.63 | 54.38 | 42.62 | 34.23 |
| 2346 | 423.4  | 191.01 | 54.43 | 42.65 | 34.24 |
| 2348 | 423.71 | 191.44 | 54.46 | 42.64 | 34.24 |
| 2350 | 423.95 | 191.82 | 54.49 | 42.65 | 34.25 |
| 2352 | 424.2  | 192.17 | 54.49 | 42.63 | 34.23 |
| 2354 | 424.66 | 192.56 | 54.55 | 42.67 | 34.27 |
| 2356 | 425.08 | 193.01 | 54.6  | 42.7  | 34.29 |
| 2358 | 425.51 | 193.41 | 54.66 | 42.74 | 34.32 |
| 2360 | 425.88 | 193.79 | 54.69 | 42.76 | 34.33 |
| 2362 | 426.26 | 194.16 | 54.72 | 42.76 | 34.33 |
| 2364 | 426.56 | 194.61 | 54.78 | 42.79 | 34.33 |
| 2366 | 426.81 | 195    | 54.81 | 42.8  | 34.35 |
| 2368 | 427.05 | 195.37 | 54.83 | 42.8  | 34.36 |
| 2370 | 427.38 | 195.75 | 54.88 | 42.83 | 34.37 |
| 2372 | 427.86 | 196.22 | 54.95 | 42.87 | 34.41 |
| 2374 | 428.28 | 196.58 | 54.98 | 42.89 | 34.41 |
| 2376 | 428.67 | 196.95 | 55.01 | 42.89 | 34.4  |
| 2378 | 429.11 | 197.34 | 55.05 | 42.92 | 34.41 |
| 2380 | 429.47 | 197.81 | 55.13 | 42.94 | 34.44 |
| 2382 | 429.79 | 198.2  | 55.19 | 42.99 | 34.46 |
| 2384 | 430.09 | 198.59 | 55.25 | 43.01 | 34.5  |
| 2386 | 430.37 | 199    | 55.31 | 43.05 | 34.52 |
| 2388 | 430.7  | 199.44 | 55.33 | 43.04 | 34.51 |
| 2390 | 431.12 | 199.85 | 55.39 | 43.07 | 34.54 |
| 2392 | 431.52 | 200.24 | 55.42 | 43.07 | 34.54 |
| 2394 | 431.96 | 200.62 | 55.46 | 43.09 | 34.55 |
| 2396 | 432.31 | 201.07 | 55.5  | 43.1  | 34.55 |
| 2398 | 432.61 | 201.44 | 55.55 | 43.11 | 34.55 |
| 2400 | 432.94 | 201.87 | 55.64 | 43.16 | 34.61 |
| 2402 | 433.22 | 202.25 | 55.66 | 43.14 | 34.59 |
| 2404 | 433.54 | 202.72 | 55.72 | 43.16 | 34.63 |
| 2406 | 433.93 | 203.12 | 55.77 | 43.2  | 34.65 |
| 2408 | 434.33 | 203.46 | 55.78 | 43.17 | 34.62 |
| 2410 | 434.77 | 203.88 | 55.85 | 43.22 | 34.65 |
| 2412 | 435.26 | 204.36 | 55.93 | 43.26 | 34.68 |
| 2414 | 435.56 | 204.71 | 55.95 | 43.23 | 34.66 |
| 2416 | 435.87 | 205.1  | 55.98 | 43.25 | 34.68 |
| 2418 | 436.21 | 205.54 | 56.07 | 43.3  | 34.73 |
| 2420 | 436.49 | 205.99 | 56.13 | 43.32 | 34.73 |
| 2422 | 436.81 | 206.36 | 56.15 | 43.32 | 34.71 |
| 2424 | 437.22 | 206.76 | 56.21 | 43.35 | 34.73 |
| 2426 | 437.67 | 207.16 | 56.28 | 43.39 | 34.77 |
| 2428 | 438.17 | 207.64 | 56.36 | 43.43 | 34.81 |

|      |        |        |       |       |       |
|------|--------|--------|-------|-------|-------|
| 2430 | 438.55 | 208.05 | 56.41 | 43.43 | 34.81 |
| 2432 | 438.89 | 208.45 | 56.47 | 43.47 | 34.84 |
| 2434 | 439.19 | 208.81 | 56.52 | 43.48 | 34.84 |
| 2436 | 439.53 | 209.28 | 56.58 | 43.5  | 34.87 |
| 2438 | 439.83 | 209.69 | 56.65 | 43.54 | 34.89 |
| 2440 | 440.17 | 210.1  | 56.7  | 43.55 | 34.9  |
| 2442 | 440.66 | 210.49 | 56.75 | 43.55 | 34.9  |
| 2444 | 441.11 | 210.96 | 56.81 | 43.59 | 34.93 |
| 2446 | 441.5  | 211.35 | 56.85 | 43.57 | 34.93 |
| 2448 | 441.85 | 211.73 | 56.87 | 43.55 | 34.9  |
| 2450 | 442.2  | 212.17 | 56.97 | 43.6  | 34.96 |
| 2452 | 442.54 | 212.65 | 57.02 | 43.63 | 34.98 |
| 2454 | 442.8  | 213.05 | 57.07 | 43.65 | 34.99 |
| 2456 | 443.11 | 213.46 | 57.13 | 43.66 | 35    |
| 2458 | 443.57 | 213.86 | 57.19 | 43.69 | 35.01 |
| 2460 | 444.03 | 214.35 | 57.26 | 43.72 | 35.04 |
| 2462 | 444.43 | 214.73 | 57.31 | 43.72 | 35.03 |
| 2464 | 444.83 | 215.14 | 57.36 | 43.74 | 35.05 |
| 2466 | 445.24 | 215.55 | 57.42 | 43.76 | 35.06 |
| 2468 | 445.51 | 216.02 | 57.46 | 43.78 | 35.07 |
| 2470 | 445.76 | 216.41 | 57.5  | 43.78 | 35.07 |
| 2472 | 446.01 | 216.81 | 57.55 | 43.79 | 35.06 |
| 2474 | 446.36 | 217.2  | 57.61 | 43.81 | 35.09 |
| 2476 | 446.85 | 217.6  | 57.67 | 43.84 | 35.1  |
| 2478 | 447.33 | 218.1  | 57.76 | 43.89 | 35.15 |
| 2480 | 447.72 | 218.49 | 57.8  | 43.88 | 35.13 |
| 2482 | 448.09 | 218.89 | 57.86 | 43.89 | 35.16 |
| 2484 | 448.47 | 219.36 | 57.9  | 43.89 | 35.16 |
| 2486 | 448.77 | 219.77 | 57.96 | 43.91 | 35.17 |
| 2488 | 449.05 | 220.18 | 58.03 | 43.94 | 35.19 |
| 2490 | 449.38 | 220.59 | 58.1  | 43.97 | 35.21 |
| 2492 | 449.7  | 221.03 | 58.17 | 44.01 | 35.24 |
| 2494 | 450.22 | 221.52 | 58.24 | 44.04 | 35.26 |
| 2496 | 450.64 | 221.91 | 58.28 | 44.03 | 35.25 |
| 2498 | 451.05 | 222.31 | 58.34 | 44.04 | 35.26 |
| 2500 | 451.47 | 222.73 | 58.41 | 44.08 | 35.29 |
| 2502 | 451.79 | 223.21 | 58.49 | 44.1  | 35.29 |
| 2504 | 452.06 | 223.61 | 58.55 | 44.12 | 35.31 |
| 2506 | 452.35 | 224.03 | 58.63 | 44.17 | 35.34 |
| 2508 | 452.72 | 224.54 | 58.7  | 44.2  | 35.35 |
| 2510 | 453.12 | 224.93 | 58.75 | 44.2  | 35.36 |
| 2512 | 453.56 | 225.34 | 58.8  | 44.2  | 35.34 |
| 2514 | 454.07 | 225.76 | 58.86 | 44.22 | 35.34 |
| 2516 | 454.48 | 226.17 | 58.92 | 44.23 | 35.37 |

|      |        |        |       |       |       |
|------|--------|--------|-------|-------|-------|
| 2518 | 454.82 | 226.64 | 59    | 44.26 | 35.38 |
| 2520 | 455.13 | 227.04 | 59.08 | 44.28 | 35.37 |
| 2522 | 455.45 | 227.47 | 59.16 | 44.31 | 35.4  |
| 2524 | 455.73 | 227.89 | 59.22 | 44.32 | 35.41 |
| 2526 | 456.08 | 228.42 | 59.32 | 44.36 | 35.44 |
| 2528 | 456.51 | 228.84 | 59.38 | 44.41 | 35.48 |
| 2530 | 456.95 | 229.25 | 59.46 | 44.43 | 35.49 |
| 2532 | 457.41 | 229.7  | 59.5  | 44.44 | 35.49 |
| 2534 | 457.77 | 230.11 | 59.57 | 44.44 | 35.5  |
| 2536 | 458.07 | 230.51 | 59.62 | 44.44 | 35.5  |
| 2538 | 458.39 | 230.93 | 59.72 | 44.49 | 35.53 |
| 2540 | 458.69 | 231.37 | 59.81 | 44.52 | 35.57 |
| 2542 | 458.96 | 231.87 | 59.88 | 44.54 | 35.58 |
| 2544 | 459.33 | 232.28 | 59.94 | 44.54 | 35.59 |
| 2546 | 459.83 | 232.68 | 60    | 44.55 | 35.61 |
| 2548 | 460.27 | 233.17 | 60.08 | 44.59 | 35.63 |
| 2550 | 460.65 | 233.58 | 60.16 | 44.62 | 35.63 |
| 2552 | 461.02 | 234.02 | 60.25 | 44.65 | 35.68 |
| 2554 | 461.3  | 234.42 | 60.29 | 44.64 | 35.67 |
| 2556 | 461.55 | 234.83 | 60.35 | 44.66 | 35.67 |
| 2558 | 461.8  | 235.3  | 60.43 | 44.7  | 35.7  |
| 2560 | 462.11 | 235.69 | 60.49 | 44.7  | 35.68 |
| 2562 | 462.57 | 236.12 | 60.58 | 44.74 | 35.72 |
| 2564 | 463.15 | 236.61 | 60.68 | 44.79 | 35.76 |
| 2566 | 463.59 | 237.02 | 60.75 | 44.82 | 35.77 |
| 2568 | 464    | 237.44 | 60.83 | 44.86 | 35.79 |
| 2570 | 464.37 | 237.85 | 60.9  | 44.88 | 35.79 |
| 2572 | 464.65 | 238.31 | 60.95 | 44.88 | 35.79 |
| 2574 | 464.88 | 238.72 | 61.01 | 44.89 | 35.82 |
| 2576 | 465.17 | 239.14 | 61.11 | 44.93 | 35.85 |
| 2578 | 465.47 | 239.51 | 61.16 | 44.94 | 35.83 |
| 2580 | 465.9  | 239.9  | 61.18 | 44.91 | 35.8  |
| 2582 | 466.3  | 240.36 | 61.26 | 44.93 | 35.81 |
| 2584 | 466.69 | 240.78 | 61.36 | 44.95 | 35.84 |
| 2586 | 467.03 | 241.2  | 61.44 | 44.99 | 35.87 |
| 2588 | 467.36 | 241.68 | 61.52 | 45.01 | 35.88 |
| 2590 | 467.61 | 242.08 | 61.61 | 45.02 | 35.9  |
| 2592 | 467.87 | 242.49 | 61.67 | 45.03 | 35.91 |
| 2594 | 468.22 | 242.9  | 61.75 | 45.04 | 35.93 |
| 2596 | 468.61 | 243.3  | 61.82 | 45.08 | 35.93 |
| 2598 | 469.07 | 243.78 | 61.91 | 45.1  | 35.94 |
| 2600 | 469.43 | 244.18 | 61.98 | 45.11 | 35.96 |
| 2602 | 469.75 | 244.59 | 62.06 | 45.12 | 35.97 |
| 2604 | 470.03 | 244.97 | 62.1  | 45.1  | 35.96 |

|      |        |        |       |       |       |
|------|--------|--------|-------|-------|-------|
| 2606 | 470.23 | 245.43 | 62.18 | 45.14 | 35.97 |
| 2608 | 470.44 | 245.81 | 62.22 | 45.13 | 35.94 |
| 2610 | 470.79 | 246.24 | 62.35 | 45.19 | 36    |
| 2612 | 471.31 | 246.69 | 62.42 | 45.2  | 36.01 |
| 2614 | 471.8  | 247.08 | 62.49 | 45.22 | 36.01 |
| 2616 | 472.25 | 247.47 | 62.56 | 45.23 | 36    |
| 2618 | 472.66 | 247.87 | 62.65 | 45.25 | 36.03 |
| 2620 | 473.09 | 248.3  | 62.74 | 45.29 | 36.07 |
| 2622 | 473.35 | 248.74 | 62.8  | 45.29 | 36.05 |
| 2624 | 473.64 | 249.17 | 62.93 | 45.37 | 36.1  |
| 2626 | 473.89 | 249.57 | 62.99 | 45.37 | 36.09 |
| 2628 | 474.24 | 250.05 | 63.08 | 45.39 | 36.12 |
| 2630 | 474.64 | 250.47 | 63.18 | 45.42 | 36.14 |
| 2632 | 475.03 | 250.83 | 63.24 | 45.41 | 36.13 |
| 2634 | 475.4  | 251.23 | 63.31 | 45.43 | 36.14 |
| 2636 | 475.77 | 251.7  | 63.41 | 45.45 | 36.16 |
| 2638 | 475.99 | 252.03 | 63.48 | 45.46 | 36.18 |
| 2640 | 476.27 | 252.5  | 63.58 | 45.47 | 36.2  |
| 2642 | 476.54 | 252.87 | 63.67 | 45.51 | 36.21 |
| 2644 | 476.88 | 253.29 | 63.76 | 45.54 | 36.23 |
| 2646 | 477.35 | 253.78 | 63.87 | 45.56 | 36.25 |
| 2648 | 477.73 | 254.17 | 63.93 | 45.56 | 36.26 |
| 2650 | 478.07 | 254.56 | 64.02 | 45.57 | 36.28 |
| 2652 | 478.44 | 254.97 | 64.11 | 45.6  | 36.3  |
| 2654 | 478.67 | 255.45 | 64.22 | 45.65 | 36.32 |
| 2656 | 478.9  | 255.83 | 64.29 | 45.66 | 36.34 |
| 2658 | 479.21 | 256.25 | 64.41 | 45.7  | 36.37 |
| 2660 | 479.63 | 256.7  | 64.5  | 45.74 | 36.4  |
| 2662 | 480.05 | 257.1  | 64.62 | 45.77 | 36.43 |
| 2664 | 480.44 | 257.5  | 64.71 | 45.79 | 36.44 |
| 2666 | 480.77 | 257.88 | 64.78 | 45.81 | 36.46 |
| 2668 | 481.1  | 258.35 | 64.87 | 45.83 | 36.48 |
| 2670 | 481.33 | 258.76 | 64.97 | 45.85 | 36.48 |
| 2672 | 481.59 | 259.15 | 65.07 | 45.88 | 36.5  |
| 2674 | 481.88 | 259.53 | 65.16 | 45.9  | 36.52 |
| 2676 | 482.31 | 259.91 | 65.25 | 45.93 | 36.52 |
| 2678 | 482.67 | 260.35 | 65.33 | 45.92 | 36.51 |
| 2680 | 483.09 | 260.79 | 65.46 | 45.99 | 36.57 |
| 2682 | 483.42 | 261.17 | 65.55 | 46.02 | 36.6  |
| 2684 | 483.75 | 261.63 | 65.67 | 46.05 | 36.63 |
| 2686 | 483.96 | 261.99 | 65.74 | 46.03 | 36.61 |
| 2688 | 484.17 | 262.36 | 65.82 | 46.03 | 36.61 |
| 2690 | 484.51 | 262.77 | 65.96 | 46.08 | 36.65 |
| 2692 | 484.97 | 263.17 | 66.05 | 46.1  | 36.66 |

|      |        |        |       |       |       |
|------|--------|--------|-------|-------|-------|
| 2694 | 485.35 | 263.6  | 66.11 | 46.1  | 36.66 |
| 2696 | 485.71 | 263.98 | 66.22 | 46.12 | 36.67 |
| 2698 | 486.03 | 264.37 | 66.32 | 46.14 | 36.68 |
| 2700 | 486.32 | 264.76 | 66.41 | 46.15 | 36.69 |
| 2702 | 486.51 | 265.21 | 66.5  | 46.16 | 36.68 |
| 2704 | 486.74 | 265.61 | 66.6  | 46.18 | 36.72 |
| 2706 | 487.08 | 265.98 | 66.71 | 46.21 | 36.72 |
| 2708 | 487.63 | 266.43 | 66.81 | 46.24 | 36.73 |
| 2710 | 488.13 | 266.81 | 66.93 | 46.29 | 36.75 |
| 2712 | 488.6  | 267.2  | 67.03 | 46.31 | 36.77 |
| 2714 | 489.02 | 267.58 | 67.13 | 46.33 | 36.77 |
| 2716 | 489.39 | 267.97 | 67.22 | 46.33 | 36.77 |
| 2718 | 489.66 | 268.42 | 67.33 | 46.35 | 36.8  |
| 2720 | 489.87 | 268.81 | 67.42 | 46.36 | 36.81 |
| 2722 | 490.11 | 269.21 | 67.54 | 46.39 | 36.84 |
| 2724 | 490.53 | 269.65 | 67.66 | 46.4  | 36.85 |
| 2726 | 490.98 | 270.03 | 67.76 | 46.42 | 36.85 |
| 2728 | 491.46 | 270.43 | 67.88 | 46.45 | 36.89 |
| 2730 | 491.86 | 270.82 | 67.98 | 46.46 | 36.91 |
| 2732 | 492.29 | 271.3  | 68.1  | 46.52 | 36.93 |
| 2734 | 492.57 | 271.69 | 68.22 | 46.55 | 36.93 |
| 2736 | 492.78 | 272.07 | 68.3  | 46.56 | 36.94 |
| 2738 | 492.93 | 272.44 | 68.39 | 46.56 | 36.94 |
| 2740 | 493.1  | 272.83 | 68.5  | 46.58 | 36.97 |
| 2742 | 493.19 | 273.22 | 68.61 | 46.59 | 36.99 |
| 2744 | 493.21 | 273.66 | 68.73 | 46.6  | 37.01 |
| 2746 | 493.24 | 274.07 | 68.86 | 46.66 | 37.03 |
| 2748 | 492.76 | 274.27 | 68.94 | 46.67 | 37.06 |
| 2750 | 490.13 | 273.79 | 69.03 | 46.65 | 37.15 |
| 2752 | 486.33 | 272.74 | 69.18 | 46.66 | 37.42 |
| 2754 | 481.64 | 271.23 | 69.29 | 46.66 | 37.72 |
| 2756 | 475.56 | 269.38 | 69.39 | 46.67 | 38.03 |
| 2758 | 470.17 | 266.98 | 69.52 | 46.71 | 38.38 |
| 2760 | 464.73 | 264.77 | 69.63 | 46.78 | 38.73 |
| 2762 | 459.27 | 262.4  | 69.72 | 46.8  | 39.1  |
| 2764 | 453.83 | 259.97 | 69.87 | 46.81 | 39.37 |
| 2766 | 447.7  | 257.14 | 70.04 | 46.83 | 39.65 |
| 2768 | 442.69 | 254.74 | 70.06 | 46.82 | 39.92 |
| 2770 | 437.78 | 252.27 | 69.94 | 46.79 | 40.12 |
| 2772 | 432.22 | 249.8  | 69.75 | 46.76 | 40.3  |
| 2774 | 427.63 | 246.95 | 69.54 | 46.73 | 40.47 |
| 2776 | 423.11 | 244.5  | 69.2  | 46.65 | 40.59 |
| 2778 | 418.75 | 242.14 | 68.97 | 46.61 | 40.77 |
| 2780 | 413.79 | 239.86 | 68.71 | 46.53 | 40.87 |

|      |        |        |       |       |       |
|------|--------|--------|-------|-------|-------|
| 2782 | 409.61 | 237.35 | 68.5  | 46.49 | 41.01 |
| 2784 | 405.42 | 235.21 | 68.33 | 46.41 | 41.14 |
| 2786 | 401.35 | 233.14 | 68.18 | 46.39 | 41.28 |
| 2788 | 397.38 | 231.1  | 67.95 | 46.32 | 41.37 |
| 2790 | 393.5  | 229.09 | 67.7  | 46.26 | 41.45 |
| 2792 | 389.12 | 226.74 | 67.38 | 46.17 | 41.5  |
| 2794 | 385.54 | 224.76 | 67.09 | 46.12 | 41.59 |
| 2796 | 381.4  | 222.81 | 66.8  | 46.06 | 41.65 |
| 2798 | 377.89 | 220.58 | 66.51 | 46    | 41.71 |
| 2800 | 374.34 | 218.68 | 66.29 | 45.89 | 41.73 |
| 2802 | 370.8  | 216.9  | 66.17 | 45.85 | 41.81 |
| 2804 | 367.27 | 215.17 | 65.97 | 45.79 | 41.86 |
| 2806 | 363.3  | 213.25 | 65.7  | 45.76 | 41.93 |
| 2808 | 360.06 | 211.53 | 65.38 | 45.66 | 41.94 |
| 2810 | 357.03 | 209.79 | 65.09 | 45.59 | 41.96 |
| 2812 | 353.65 | 207.69 | 64.79 | 45.53 | 42    |
| 2814 | 350.83 | 205.87 | 64.45 | 45.46 | 42.01 |
| 2816 | 348.12 | 204.09 | 64.19 | 45.42 | 42.07 |
| 2818 | 345.45 | 202.34 | 63.92 | 45.38 | 42.12 |
| 2820 | 342.8  | 200.67 | 63.62 | 45.32 | 42.15 |
| 2822 | 339.63 | 198.69 | 63.24 | 45.22 | 42.11 |
| 2824 | 336.92 | 197.07 | 62.96 | 45.18 | 42.14 |
| 2826 | 334.2  | 195.44 | 62.68 | 45.13 | 42.17 |
| 2828 | 330.95 | 193.8  | 62.41 | 45.08 | 42.17 |
| 2830 | 328.15 | 191.93 | 62.13 | 45.01 | 42.17 |
| 2832 | 325.43 | 190.39 | 61.88 | 44.95 | 42.17 |
| 2834 | 322.8  | 188.88 | 61.61 | 44.9  | 42.17 |
| 2836 | 320.18 | 187.38 | 61.33 | 44.83 | 42.16 |
| 2838 | 317.09 | 185.9  | 61.04 | 44.75 | 42.14 |
| 2840 | 314.52 | 184.22 | 60.72 | 44.7  | 42.13 |
| 2842 | 312.02 | 182.81 | 60.46 | 44.63 | 42.11 |
| 2844 | 309.56 | 181.42 | 60.2  | 44.56 | 42.09 |
| 2846 | 306.66 | 179.72 | 59.93 | 44.47 | 42.04 |
| 2848 | 304.11 | 178.17 | 59.56 | 44.34 | 41.94 |
| 2850 | 301.58 | 176.61 | 59.24 | 44.22 | 41.87 |
| 2852 | 298.75 | 175.16 | 58.99 | 44.17 | 41.84 |
| 2854 | 296.39 | 173.52 | 58.72 | 44.09 | 41.81 |
| 2856 | 294.04 | 172.11 | 58.46 | 43.98 | 41.74 |
| 2858 | 291.75 | 170.74 | 58.23 | 43.91 | 41.71 |
| 2860 | 289.5  | 169.38 | 58    | 43.84 | 41.67 |
| 2862 | 286.99 | 167.87 | 57.81 | 43.76 | 41.63 |
| 2864 | 284.89 | 166.6  | 57.58 | 43.69 | 41.6  |
| 2866 | 282.78 | 165.36 | 57.4  | 43.59 | 41.55 |
| 2868 | 280.4  | 164.15 | 57.22 | 43.51 | 41.52 |

|      |        |        |       |       |       |
|------|--------|--------|-------|-------|-------|
| 2870 | 278.38 | 162.78 | 56.97 | 43.43 | 41.49 |
| 2872 | 276.38 | 161.64 | 56.79 | 43.31 | 41.43 |
| 2874 | 274.44 | 160.58 | 56.68 | 43.26 | 41.44 |
| 2876 | 272.17 | 159.49 | 56.52 | 43.19 | 41.4  |
| 2878 | 270.26 | 158.21 | 56.29 | 43.11 | 41.36 |
| 2880 | 268.33 | 157.07 | 56.07 | 43    | 41.29 |
| 2882 | 266.4  | 155.97 | 55.88 | 42.93 | 41.24 |
| 2884 | 264.16 | 154.91 | 55.73 | 42.88 | 41.19 |
| 2886 | 262.25 | 153.59 | 55.55 | 42.8  | 41.14 |
| 2888 | 260.39 | 152.45 | 55.32 | 42.7  | 41.06 |
| 2890 | 258.59 | 151.36 | 55.21 | 42.66 | 41.03 |
| 2892 | 256.44 | 150.04 | 55.01 | 42.56 | 40.95 |
| 2894 | 254.66 | 148.92 | 54.81 | 42.48 | 40.89 |
| 2896 | 252.93 | 147.8  | 54.66 | 42.41 | 40.84 |
| 2898 | 251.24 | 146.71 | 54.43 | 42.33 | 40.77 |
| 2900 | 249.55 | 145.58 | 54.21 | 42.24 | 40.7  |
| 2902 | 247.66 | 144.34 | 54.02 | 42.18 | 40.67 |
| 2904 | 246.02 | 143.29 | 53.8  | 42.11 | 40.61 |
| 2906 | 244.43 | 142.29 | 53.64 | 42.05 | 40.57 |
| 2908 | 242.55 | 141.25 | 53.44 | 41.99 | 40.51 |
| 2910 | 240.98 | 140.08 | 53.24 | 41.93 | 40.46 |
| 2912 | 239.42 | 139.1  | 53    | 41.83 | 40.41 |
| 2914 | 237.86 | 138.14 | 52.84 | 41.78 | 40.34 |
| 2916 | 236.33 | 137.21 | 52.72 | 41.72 | 40.3  |
| 2918 | 234.54 | 136.14 | 52.59 | 41.69 | 40.29 |
| 2920 | 232.98 | 135.21 | 52.46 | 41.62 | 40.24 |
| 2922 | 231.48 | 134.28 | 52.3  | 41.56 | 40.19 |
| 2924 | 230.02 | 133.36 | 52.1  | 41.51 | 40.14 |
| 2926 | 228.38 | 132.26 | 51.9  | 41.45 | 40.08 |
| 2928 | 226.99 | 131.35 | 51.67 | 41.4  | 40.04 |
| 2930 | 225.66 | 130.46 | 51.46 | 41.35 | 39.98 |
| 2932 | 224.08 | 129.39 | 51.24 | 41.29 | 39.92 |
| 2934 | 222.74 | 128.47 | 50.99 | 41.22 | 39.87 |
| 2936 | 221.43 | 127.54 | 50.78 | 41.17 | 39.8  |
| 2938 | 220.06 | 126.63 | 50.6  | 41.11 | 39.74 |
| 2940 | 218.65 | 125.73 | 50.44 | 41.06 | 39.69 |
| 2942 | 216.98 | 124.63 | 50.27 | 41    | 39.63 |
| 2944 | 215.55 | 123.68 | 50.09 | 40.95 | 39.58 |
| 2946 | 214.12 | 122.73 | 49.92 | 40.88 | 39.51 |
| 2948 | 212.7  | 121.81 | 49.78 | 40.81 | 39.44 |
| 2950 | 211.09 | 120.8  | 49.65 | 40.75 | 39.38 |
| 2952 | 209.75 | 119.98 | 49.58 | 40.67 | 39.32 |
| 2954 | 208.45 | 119.15 | 49.48 | 40.6  | 39.26 |
| 2956 | 206.99 | 118.19 | 49.35 | 40.52 | 39.19 |

|      |        |        |       |       |       |
|------|--------|--------|-------|-------|-------|
| 2958 | 205.79 | 117.39 | 49.19 | 40.46 | 39.14 |
| 2960 | 204.63 | 116.61 | 49.02 | 40.39 | 39.07 |
| 2962 | 203.43 | 115.87 | 48.88 | 40.34 | 39.03 |
| 2964 | 201.97 | 115.15 | 48.71 | 40.27 | 38.98 |
| 2966 | 200.7  | 114.3  | 48.54 | 40.2  | 38.91 |
| 2968 | 199.5  | 113.63 | 48.41 | 40.14 | 38.88 |
| 2970 | 198.31 | 112.93 | 48.26 | 40.09 | 38.8  |
| 2972 | 196.93 | 112.13 | 48.14 | 40.02 | 38.74 |
| 2974 | 195.73 | 111.46 | 48.03 | 39.93 | 38.68 |
| 2976 | 194.51 | 110.81 | 47.96 | 39.87 | 38.61 |
| 2978 | 193.29 | 110.14 | 47.91 | 39.81 | 38.56 |
| 2980 | 191.91 | 109.45 | 47.79 | 39.73 | 38.48 |
| 2982 | 190.78 | 108.67 | 47.63 | 39.63 | 38.41 |
| 2984 | 189.69 | 107.98 | 47.46 | 39.56 | 38.33 |
| 2986 | 188.67 | 107.32 | 47.31 | 39.5  | 38.28 |
| 2988 | 187.53 | 106.65 | 47.18 | 39.42 | 38.22 |
| 2990 | 186.55 | 105.91 | 47.06 | 39.37 | 38.18 |
| 2992 | 185.57 | 105.28 | 46.92 | 39.29 | 38.13 |
| 2994 | 184.55 | 104.62 | 46.76 | 39.21 | 38.04 |
| 2996 | 183.35 | 103.94 | 46.61 | 39.12 | 37.96 |
| 2998 | 182.37 | 103.22 | 46.44 | 39.07 | 37.91 |
| 3000 | 181.43 | 102.62 | 46.27 | 38.99 | 37.84 |
| 3002 | 180.55 | 102.04 | 46.09 | 38.92 | 37.78 |
| 3004 | 179.66 | 101.46 | 45.92 | 38.86 | 37.72 |
| 3006 | 178.61 | 100.82 | 45.78 | 38.79 | 37.66 |
| 3008 | 177.7  | 100.3  | 45.63 | 38.73 | 37.6  |
| 3010 | 176.76 | 99.78  | 45.47 | 38.66 | 37.54 |
| 3012 | 175.73 | 99.27  | 45.33 | 38.62 | 37.51 |
| 3014 | 174.86 | 98.6   | 45.14 | 38.54 | 37.43 |
| 3016 | 174.04 | 97.99  | 44.9  | 38.46 | 37.37 |
| 3018 | 173.21 | 97.35  | 44.67 | 38.36 | 37.27 |
| 3020 | 172.41 | 96.74  | 44.49 | 38.3  | 37.22 |
| 3022 | 171.37 | 96.06  | 44.27 | 38.22 | 37.14 |
| 3024 | 170.45 | 95.5   | 44.1  | 38.14 | 37.07 |
| 3026 | 169.52 | 94.95  | 43.94 | 38.07 | 37    |
| 3028 | 168.6  | 94.41  | 43.79 | 38.01 | 36.95 |
| 3030 | 167.52 | 93.81  | 43.62 | 37.94 | 36.88 |
| 3032 | 166.61 | 93.31  | 43.49 | 37.87 | 36.81 |
| 3034 | 165.75 | 92.82  | 43.38 | 37.82 | 36.77 |
| 3036 | 164.88 | 92.3   | 43.25 | 37.74 | 36.7  |
| 3038 | 163.91 | 91.69  | 43.1  | 37.66 | 36.62 |
| 3040 | 163.13 | 91.21  | 42.97 | 37.6  | 36.58 |
| 3042 | 162.3  | 90.72  | 42.84 | 37.54 | 36.53 |
| 3044 | 161.25 | 90.23  | 42.72 | 37.48 | 36.48 |



|      |        |       |       |       |       |
|------|--------|-------|-------|-------|-------|
| 3046 | 160.34 | 89.69 | 42.58 | 37.43 | 36.44 |
| 3048 | 159.39 | 89.2  | 42.43 | 37.34 | 36.36 |
| 3050 | 158.45 | 88.7  | 42.32 | 37.27 | 36.29 |
| 3052 | 157.36 | 88.21 | 42.19 | 37.22 | 36.23 |
| 3054 | 156.51 | 87.67 | 42.05 | 37.16 | 36.18 |
| 3056 | 155.7  | 87.17 | 41.84 | 37.07 | 36.1  |
| 3058 | 154.95 | 86.67 | 41.7  | 37    | 36.03 |
| 3060 | 154.14 | 86.18 | 41.57 | 36.96 | 36    |
| 3062 | 153.43 | 85.7  | 41.46 | 36.96 | 35.98 |
| 3064 | 152.69 | 85.23 | 41.3  | 36.87 | 35.88 |
| 3066 | 152.01 | 84.76 | 41.14 | 36.78 | 35.82 |
| 3068 | 151.23 | 84.22 | 41    | 36.74 | 35.79 |
| 3070 | 150.49 | 83.72 | 40.79 | 36.67 | 35.72 |
| 3072 | 149.68 | 83.22 | 40.61 | 36.57 | 35.62 |
| 3074 | 148.85 | 82.74 | 40.45 | 36.51 | 35.55 |
| 3076 | 148.02 | 82.29 | 40.29 | 36.44 | 35.5  |
| 3078 | 147.15 | 81.79 | 40.17 | 36.4  | 35.46 |
| 3080 | 146.43 | 81.36 | 40.02 | 36.32 | 35.39 |
| 3082 | 145.77 | 81    | 39.94 | 36.3  | 35.37 |
| 3084 | 144.92 | 80.58 | 39.81 | 36.22 | 35.3  |
| 3086 | 144.22 | 80.12 | 39.68 | 36.16 | 35.23 |
| 3088 | 143.49 | 79.73 | 39.52 | 36.09 | 35.17 |
| 3090 | 142.71 | 79.33 | 39.37 | 36    | 35.07 |
| 3092 | 141.91 | 78.96 | 39.27 | 35.96 | 35.03 |
| 3094 | 141.18 | 78.56 | 39.18 | 35.93 | 34.99 |
| 3096 | 140.4  | 78.17 | 39.05 | 35.86 | 34.93 |
| 3098 | 139.68 | 77.78 | 38.92 | 35.78 | 34.86 |
| 3100 | 138.9  | 77.29 | 38.79 | 35.73 | 34.8  |
| 3102 | 138.22 | 76.87 | 38.61 | 35.64 | 34.72 |
| 3104 | 137.56 | 76.5  | 38.5  | 35.61 | 34.69 |
| 3106 | 136.94 | 76.11 | 38.36 | 35.54 | 34.65 |
| 3108 | 136.23 | 75.69 | 38.19 | 35.45 | 34.55 |
| 3110 | 135.63 | 75.28 | 38.06 | 35.39 | 34.5  |
| 3112 | 135    | 74.92 | 37.92 | 35.33 | 34.45 |
| 3114 | 134.31 | 74.55 | 37.81 | 35.27 | 34.38 |
| 3116 | 133.46 | 74.16 | 37.72 | 35.2  | 34.33 |
| 3118 | 132.68 | 73.7  | 37.64 | 35.13 | 34.27 |
| 3120 | 131.91 | 73.3  | 37.58 | 35.07 | 34.21 |
| 3122 | 131.19 | 72.87 | 37.49 | 34.99 | 34.13 |
| 3124 | 130.51 | 72.45 | 37.39 | 34.91 | 34.06 |
| 3126 | 129.84 | 72.06 | 37.34 | 34.88 | 34.04 |
| 3128 | 129.2  | 71.67 | 37.23 | 34.8  | 33.96 |
| 3130 | 128.53 | 71.29 | 37.14 | 34.73 | 33.88 |
| 3132 | 127.89 | 70.91 | 37.05 | 34.66 | 33.84 |

|      |        |       |       |       |       |
|------|--------|-------|-------|-------|-------|
| 3134 | 127.22 | 70.52 | 37.01 | 34.63 | 33.81 |
| 3136 | 126.59 | 70.15 | 36.97 | 34.54 | 33.75 |
| 3138 | 125.92 | 69.77 | 36.9  | 34.46 | 33.67 |
| 3140 | 125.22 | 69.43 | 36.89 | 34.45 | 33.65 |
| 3142 | 124.56 | 68.95 | 36.8  | 34.38 | 33.59 |
| 3144 | 123.91 | 68.63 | 36.74 | 34.33 | 33.54 |
| 3146 | 123.25 | 68.15 | 36.65 | 34.24 | 33.44 |
| 3148 | 122.61 | 67.75 | 36.62 | 34.19 | 33.39 |
| 3150 | 121.85 | 67.31 | 36.54 | 34.13 | 33.33 |
| 3152 | 121.24 | 67    | 36.49 | 34.09 | 33.28 |
| 3154 | 120.65 | 66.68 | 36.43 | 34.05 | 33.24 |
| 3156 | 120.03 | 66.32 | 36.34 | 33.97 | 33.17 |
| 3158 | 119.36 | 65.93 | 36.25 | 33.91 | 33.12 |
| 3160 | 118.82 | 65.6  | 36.15 | 33.83 | 33.04 |
| 3162 | 118.32 | 65.29 | 36.08 | 33.8  | 33.01 |
| 3164 | 117.73 | 64.97 | 35.98 | 33.73 | 32.94 |
| 3166 | 117.19 | 64.6  | 35.88 | 33.66 | 32.89 |
| 3168 | 116.73 | 64.31 | 35.81 | 33.61 | 32.84 |
| 3170 | 116.27 | 64.01 | 35.72 | 33.55 | 32.77 |
| 3172 | 115.77 | 63.68 | 35.63 | 33.49 | 32.73 |
| 3174 | 115.36 | 63.4  | 35.53 | 33.43 | 32.68 |
| 3176 | 114.97 | 63.11 | 35.42 | 33.37 | 32.63 |
| 3178 | 114.55 | 62.83 | 35.32 | 33.32 | 32.57 |
| 3180 | 114.05 | 62.57 | 35.25 | 33.31 | 32.54 |
| 3182 | 113.56 | 62.23 | 35.14 | 33.24 | 32.48 |
| 3184 | 113.07 | 61.93 | 35.05 | 33.18 | 32.43 |
| 3186 | 112.62 | 61.66 | 34.96 | 33.12 | 32.38 |
| 3188 | 112.13 | 61.35 | 34.9  | 33.08 | 32.33 |
| 3190 | 111.71 | 61.1  | 34.83 | 33.04 | 32.28 |
| 3192 | 111.26 | 60.84 | 34.76 | 32.97 | 32.23 |
| 3194 | 110.79 | 60.59 | 34.69 | 32.91 | 32.17 |
| 3196 | 110.33 | 60.35 | 34.63 | 32.88 | 32.14 |
| 3198 | 109.82 | 60.07 | 34.55 | 32.83 | 32.09 |
| 3200 | 109.4  | 59.82 | 34.46 | 32.76 | 32.02 |
| 3202 | 109.04 | 59.65 | 34.45 | 32.77 | 32.03 |
| 3204 | 108.66 | 59.47 | 34.43 | 32.74 | 32.01 |
| 3206 | 108.19 | 59.23 | 34.38 | 32.68 | 31.93 |
| 3208 | 107.83 | 59.06 | 34.38 | 32.67 | 31.93 |
| 3210 | 107.46 | 58.87 | 34.32 | 32.63 | 31.89 |
| 3212 | 107.05 | 58.65 | 34.23 | 32.57 | 31.83 |
| 3214 | 106.72 | 58.39 | 34.14 | 32.54 | 31.8  |
| 3216 | 106.3  | 58.13 | 34.02 | 32.48 | 31.74 |
| 3218 | 105.88 | 57.9  | 33.94 | 32.44 | 31.7  |
| 3220 | 105.3  | 57.6  | 33.82 | 32.36 | 31.63 |

|      |        |       |       |       |       |
|------|--------|-------|-------|-------|-------|
| 3222 | 104.9  | 57.4  | 33.78 | 32.33 | 31.62 |
| 3224 | 104.48 | 57.19 | 33.74 | 32.28 | 31.56 |
| 3226 | 104.06 | 56.97 | 33.68 | 32.21 | 31.5  |
| 3228 | 103.66 | 56.8  | 33.66 | 32.2  | 31.51 |
| 3230 | 103.29 | 56.58 | 33.61 | 32.16 | 31.47 |
| 3232 | 102.95 | 56.41 | 33.54 | 32.12 | 31.42 |
| 3234 | 102.61 | 56.21 | 33.49 | 32.09 | 31.38 |
| 3236 | 102.22 | 55.96 | 33.4  | 32.03 | 31.31 |
| 3238 | 101.89 | 55.75 | 33.3  | 31.99 | 31.28 |
| 3240 | 101.61 | 55.57 | 33.26 | 31.95 | 31.24 |
| 3242 | 101.3  | 55.35 | 33.15 | 31.88 | 31.17 |
| 3244 | 101.04 | 55.17 | 33.1  | 31.87 | 31.17 |
| 3246 | 100.65 | 54.91 | 33    | 31.8  | 31.1  |
| 3248 | 100.34 | 54.75 | 32.95 | 31.79 | 31.09 |
| 3250 | 99.98  | 54.54 | 32.86 | 31.68 | 30.99 |
| 3252 | 99.6   | 54.37 | 32.78 | 31.65 | 30.95 |
| 3254 | 99.29  | 54.17 | 32.71 | 31.62 | 30.92 |
| 3256 | 98.97  | 53.97 | 32.62 | 31.56 | 30.86 |
| 3258 | 98.69  | 53.77 | 32.55 | 31.51 | 30.83 |
| 3260 | 98.33  | 53.49 | 32.44 | 31.46 | 30.77 |
| 3262 | 98.06  | 53.26 | 32.34 | 31.4  | 30.71 |
| 3264 | 97.8   | 53.07 | 32.28 | 31.37 | 30.7  |
| 3266 | 97.53  | 52.88 | 32.21 | 31.34 | 30.68 |
| 3268 | 97.26  | 52.69 | 32.14 | 31.32 | 30.67 |
| 3270 | 96.93  | 52.46 | 32.07 | 31.27 | 30.65 |
| 3272 | 96.61  | 52.27 | 31.99 | 31.25 | 30.63 |
| 3274 | 96.31  | 52.09 | 31.92 | 31.22 | 30.61 |
| 3276 | 95.98  | 51.92 | 31.85 | 31.18 | 30.6  |
| 3278 | 95.68  | 51.78 | 31.81 | 31.15 | 30.59 |
| 3280 | 95.37  | 51.65 | 31.78 | 31.13 | 30.57 |
| 3282 | 95.04  | 51.52 | 31.74 | 31.1  | 30.55 |
| 3284 | 94.69  | 51.36 | 31.69 | 31.07 | 30.52 |
| 3286 | 94.29  | 51.16 | 31.62 | 31.03 | 30.48 |
| 3288 | 93.95  | 50.98 | 31.56 | 31    | 30.44 |
| 3290 | 93.63  | 50.82 | 31.52 | 30.98 | 30.41 |
| 3292 | 93.26  | 50.65 | 31.47 | 30.92 | 30.35 |
| 3294 | 92.94  | 50.47 | 31.43 | 30.89 | 30.32 |
| 3296 | 92.6   | 50.3  | 31.38 | 30.84 | 30.27 |
| 3298 | 92.28  | 50.15 | 31.33 | 30.79 | 30.22 |
| 3300 | 91.9   | 50.01 | 31.29 | 30.76 | 30.19 |
| 3302 | 91.56  | 49.8  | 31.21 | 30.72 | 30.15 |
| 3304 | 91.19  | 49.61 | 31.11 | 30.64 | 30.07 |
| 3306 | 90.78  | 49.42 | 31.03 | 30.57 | 30.02 |
| 3308 | 90.35  | 49.27 | 30.96 | 30.53 | 29.96 |

|      |       |       |       |       |       |
|------|-------|-------|-------|-------|-------|
| 3310 | 90.05 | 49.13 | 30.92 | 30.53 | 29.96 |
| 3312 | 89.71 | 48.98 | 30.85 | 30.49 | 29.91 |
| 3314 | 89.36 | 48.84 | 30.77 | 30.44 | 29.86 |
| 3316 | 88.98 | 48.66 | 30.69 | 30.39 | 29.81 |
| 3318 | 88.72 | 48.53 | 30.62 | 30.34 | 29.78 |
| 3320 | 88.44 | 48.36 | 30.54 | 30.3  | 29.71 |
| 3322 | 88.21 | 48.21 | 30.46 | 30.26 | 29.67 |
| 3324 | 87.94 | 48.03 | 30.37 | 30.19 | 29.6  |
| 3326 | 87.69 | 47.87 | 30.34 | 30.2  | 29.61 |
| 3328 | 87.4  | 47.69 | 30.27 | 30.13 | 29.55 |
| 3330 | 87.09 | 47.51 | 30.21 | 30.08 | 29.48 |
| 3332 | 86.78 | 47.38 | 30.18 | 30.04 | 29.46 |
| 3334 | 86.53 | 47.21 | 30.14 | 29.99 | 29.41 |
| 3336 | 86.3  | 47.09 | 30.09 | 29.93 | 29.36 |
| 3338 | 86.07 | 46.99 | 30.07 | 29.9  | 29.34 |
| 3340 | 85.78 | 46.88 | 30.04 | 29.86 | 29.3  |
| 3342 | 85.53 | 46.75 | 30.02 | 29.82 | 29.26 |
| 3344 | 85.27 | 46.63 | 29.96 | 29.75 | 29.2  |
| 3346 | 85.02 | 46.54 | 29.93 | 29.74 | 29.17 |
| 3348 | 84.71 | 46.42 | 29.88 | 29.69 | 29.14 |
| 3350 | 84.45 | 46.27 | 29.82 | 29.66 | 29.09 |
| 3352 | 84.22 | 46.14 | 29.76 | 29.62 | 29.05 |
| 3354 | 84    | 46.01 | 29.69 | 29.58 | 29.01 |
| 3356 | 83.75 | 45.86 | 29.63 | 29.54 | 28.98 |
| 3358 | 83.55 | 45.74 | 29.56 | 29.51 | 28.94 |
| 3360 | 83.3  | 45.61 | 29.49 | 29.43 | 28.88 |
| 3362 | 83.07 | 45.51 | 29.43 | 29.38 | 28.82 |
| 3364 | 82.88 | 45.45 | 29.44 | 29.35 | 28.81 |
| 3366 | 82.63 | 45.37 | 29.43 | 29.32 | 28.79 |
| 3368 | 82.37 | 45.24 | 29.4  | 29.26 | 28.73 |
| 3370 | 82.17 | 45.16 | 29.46 | 29.25 | 28.72 |
| 3372 | 81.95 | 45.06 | 29.5  | 29.21 | 28.69 |
| 3374 | 81.67 | 44.91 | 29.5  | 29.14 | 28.63 |
| 3376 | 81.43 | 44.8  | 29.51 | 29.12 | 28.6  |
| 3378 | 81.18 | 44.68 | 29.48 | 29.09 | 28.57 |
| 3380 | 80.92 | 44.55 | 29.44 | 29.04 | 28.54 |
| 3382 | 80.59 | 44.38 | 29.39 | 29.01 | 28.5  |
| 3384 | 80.35 | 44.25 | 29.36 | 28.97 | 28.47 |
| 3386 | 80.11 | 44.13 | 29.32 | 28.93 | 28.44 |
| 3388 | 79.85 | 44.01 | 29.28 | 28.9  | 28.4  |
| 3390 | 79.63 | 43.87 | 29.23 | 28.88 | 28.37 |
| 3392 | 79.44 | 43.75 | 29.19 | 28.83 | 28.35 |
| 3394 | 79.22 | 43.63 | 29.16 | 28.81 | 28.32 |
| 3396 | 78.98 | 43.52 | 29.13 | 28.79 | 28.31 |

|      |       |       |       |       |       |
|------|-------|-------|-------|-------|-------|
| 3398 | 78.73 | 43.35 | 29.07 | 28.76 | 28.27 |
| 3400 | 78.48 | 43.21 | 29    | 28.73 | 28.25 |
| 3402 | 78.23 | 43.04 | 28.93 | 28.68 | 28.2  |
| 3404 | 77.97 | 42.86 | 28.83 | 28.63 | 28.14 |
| 3406 | 77.78 | 42.72 | 28.8  | 28.64 | 28.15 |
| 3408 | 77.56 | 42.56 | 28.74 | 28.62 | 28.11 |
| 3410 | 77.33 | 42.4  | 28.68 | 28.59 | 28.08 |
| 3412 | 77.09 | 42.25 | 28.63 | 28.54 | 28.04 |
| 3414 | 76.83 | 42.09 | 28.6  | 28.53 | 28.03 |
| 3416 | 76.56 | 41.94 | 28.52 | 28.49 | 27.97 |
| 3418 | 76.32 | 41.8  | 28.47 | 28.45 | 27.94 |
| 3420 | 76.1  | 41.66 | 28.41 | 28.41 | 27.91 |
| 3422 | 75.83 | 41.5  | 28.35 | 28.36 | 27.87 |
| 3424 | 75.59 | 41.37 | 28.3  | 28.31 | 27.83 |
| 3426 | 75.34 | 41.25 | 28.28 | 28.28 | 27.8  |
| 3428 | 75.04 | 41.14 | 28.28 | 28.25 | 27.77 |
| 3430 | 74.79 | 41.03 | 28.3  | 28.21 | 27.75 |
| 3432 | 74.57 | 40.96 | 28.32 | 28.2  | 27.75 |
| 3434 | 74.32 | 40.86 | 28.32 | 28.16 | 27.7  |
| 3436 | 74.04 | 40.76 | 28.31 | 28.14 | 27.68 |
| 3438 | 73.88 | 40.72 | 28.3  | 28.14 | 27.69 |
| 3440 | 73.7  | 40.64 | 28.24 | 28.09 | 27.65 |
| 3442 | 73.59 | 40.59 | 28.21 | 28.07 | 27.63 |
| 3444 | 73.42 | 40.48 | 28.11 | 27.99 | 27.56 |
| 3446 | 73.25 | 40.41 | 28.09 | 27.99 | 27.56 |
| 3448 | 73.08 | 40.35 | 28.07 | 27.99 | 27.55 |
| 3450 | 72.92 | 40.28 | 28.04 | 27.97 | 27.54 |
| 3452 | 72.71 | 40.18 | 27.99 | 27.93 | 27.49 |
| 3454 | 72.48 | 40.08 | 27.95 | 27.9  | 27.47 |
| 3456 | 72.3  | 40.01 | 27.92 | 27.88 | 27.45 |
| 3458 | 72.08 | 39.89 | 27.85 | 27.8  | 27.38 |
| 3460 | 71.92 | 39.83 | 27.84 | 27.81 | 27.37 |
| 3462 | 71.69 | 39.72 | 27.8  | 27.76 | 27.33 |
| 3464 | 71.48 | 39.62 | 27.73 | 27.71 | 27.29 |
| 3466 | 71.31 | 39.55 | 27.73 | 27.7  | 27.28 |
| 3468 | 71.11 | 39.5  | 27.7  | 27.69 | 27.28 |
| 3470 | 70.95 | 39.43 | 27.69 | 27.68 | 27.26 |
| 3472 | 70.77 | 39.35 | 27.64 | 27.66 | 27.25 |
| 3474 | 70.58 | 39.27 | 27.6  | 27.64 | 27.22 |
| 3476 | 70.3  | 39.14 | 27.53 | 27.58 | 27.15 |
| 3478 | 70.12 | 39.06 | 27.53 | 27.57 | 27.13 |
| 3480 | 69.99 | 39.01 | 27.54 | 27.57 | 27.12 |
| 3482 | 69.84 | 38.93 | 27.5  | 27.54 | 27.1  |
| 3484 | 69.72 | 38.91 | 27.5  | 27.55 | 27.11 |

|      |       |       |       |       |       |
|------|-------|-------|-------|-------|-------|
| 3486 | 69.64 | 38.86 | 27.47 | 27.52 | 27.07 |
| 3488 | 69.54 | 38.79 | 27.43 | 27.5  | 27.06 |
| 3490 | 69.47 | 38.75 | 27.43 | 27.5  | 27.05 |
| 3492 | 69.33 | 38.67 | 27.37 | 27.44 | 26.99 |
| 3494 | 69.21 | 38.64 | 27.41 | 27.44 | 27.01 |
| 3496 | 69.08 | 38.6  | 27.41 | 27.43 | 27.01 |
| 3498 | 68.9  | 38.51 | 27.38 | 27.38 | 26.95 |
| 3500 | 68.73 | 38.44 | 27.35 | 27.35 | 26.94 |
| 3502 | 68.59 | 38.38 | 27.35 | 27.36 | 26.94 |
| 3504 | 68.47 | 38.31 | 27.34 | 27.33 | 26.92 |
| 3506 | 68.33 | 38.24 | 27.3  | 27.31 | 26.91 |
| 3508 | 68.2  | 38.21 | 27.28 | 27.32 | 26.93 |
| 3510 | 68.06 | 38.15 | 27.27 | 27.31 | 26.93 |
| 3512 | 67.89 | 38.07 | 27.24 | 27.28 | 26.9  |
| 3514 | 67.72 | 37.98 | 27.21 | 27.26 | 26.87 |
| 3516 | 67.53 | 37.9  | 27.19 | 27.24 | 26.85 |
| 3518 | 67.31 | 37.8  | 27.15 | 27.2  | 26.81 |
| 3520 | 67.15 | 37.74 | 27.15 | 27.18 | 26.78 |
| 3522 | 66.98 | 37.66 | 27.15 | 27.16 | 26.77 |
| 3524 | 66.8  | 37.58 | 27.11 | 27.13 | 26.74 |
| 3526 | 66.59 | 37.49 | 27.1  | 27.12 | 26.72 |
| 3528 | 66.45 | 37.43 | 27.09 | 27.1  | 26.7  |
| 3530 | 66.27 | 37.33 | 27.04 | 27.04 | 26.64 |
| 3532 | 66.11 | 37.25 | 27    | 27.01 | 26.61 |
| 3534 | 65.92 | 37.15 | 26.98 | 26.98 | 26.59 |
| 3536 | 65.73 | 37.06 | 26.94 | 26.93 | 26.53 |
| 3538 | 65.55 | 36.97 | 26.89 | 26.88 | 26.5  |
| 3540 | 65.39 | 36.92 | 26.89 | 26.87 | 26.48 |
| 3542 | 65.23 | 36.81 | 26.84 | 26.81 | 26.44 |
| 3544 | 65.09 | 36.75 | 26.83 | 26.79 | 26.41 |
| 3546 | 64.93 | 36.68 | 26.81 | 26.75 | 26.37 |
| 3548 | 64.74 | 36.61 | 26.8  | 26.73 | 26.35 |
| 3550 | 64.6  | 36.57 | 26.77 | 26.7  | 26.33 |
| 3552 | 64.5  | 36.55 | 26.77 | 26.71 | 26.33 |
| 3554 | 64.38 | 36.5  | 26.75 | 26.67 | 26.29 |
| 3556 | 64.26 | 36.45 | 26.71 | 26.65 | 26.27 |
| 3558 | 64.1  | 36.39 | 26.69 | 26.61 | 26.25 |
| 3560 | 63.97 | 36.32 | 26.65 | 26.55 | 26.18 |
| 3562 | 63.9  | 36.31 | 26.68 | 26.54 | 26.19 |
| 3564 | 63.8  | 36.27 | 26.66 | 26.53 | 26.17 |
| 3566 | 63.7  | 36.25 | 26.65 | 26.52 | 26.17 |
| 3568 | 63.57 | 36.18 | 26.58 | 26.47 | 26.13 |
| 3570 | 63.47 | 36.13 | 26.54 | 26.44 | 26.09 |
| 3572 | 63.37 | 36.08 | 26.52 | 26.43 | 26.09 |

|      |       |       |       |       |       |
|------|-------|-------|-------|-------|-------|
| 3574 | 63.24 | 36    | 26.49 | 26.43 | 26.07 |
| 3576 | 63.12 | 35.94 | 26.47 | 26.41 | 26.05 |
| 3578 | 63    | 35.88 | 26.46 | 26.4  | 26.02 |
| 3580 | 62.86 | 35.83 | 26.45 | 26.38 | 26.01 |
| 3582 | 62.7  | 35.74 | 26.41 | 26.34 | 25.97 |
| 3584 | 62.59 | 35.7  | 26.43 | 26.31 | 25.97 |
| 3586 | 62.48 | 35.68 | 26.44 | 26.29 | 25.95 |
| 3588 | 62.33 | 35.62 | 26.44 | 26.27 | 25.93 |
| 3590 | 62.19 | 35.59 | 26.42 | 26.24 | 25.9  |
| 3592 | 62.1  | 35.59 | 26.44 | 26.25 | 25.91 |
| 3594 | 61.95 | 35.54 | 26.43 | 26.22 | 25.87 |
| 3596 | 61.82 | 35.53 | 26.46 | 26.24 | 25.89 |
| 3598 | 61.71 | 35.51 | 26.42 | 26.19 | 25.86 |
| 3600 | 61.62 | 35.47 | 26.37 | 26.17 | 25.84 |
| 3602 | 61.56 | 35.47 | 26.36 | 26.16 | 25.83 |
| 3604 | 61.48 | 35.42 | 26.3  | 26.13 | 25.79 |
| 3606 | 61.39 | 35.35 | 26.23 | 26.09 | 25.74 |
| 3608 | 61.37 | 35.31 | 26.2  | 26.08 | 25.74 |
| 3610 | 61.33 | 35.28 | 26.19 | 26.08 | 25.75 |
| 3612 | 61.25 | 35.22 | 26.16 | 26.05 | 25.71 |
| 3614 | 61.15 | 35.18 | 26.15 | 26.04 | 25.7  |
| 3616 | 61.03 | 35.12 | 26.12 | 26.01 | 25.68 |
| 3618 | 60.92 | 35.07 | 26.1  | 25.98 | 25.66 |
| 3620 | 60.81 | 35.02 | 26.07 | 25.95 | 25.64 |
| 3622 | 60.7  | 34.95 | 26.04 | 25.93 | 25.61 |
| 3624 | 60.59 | 34.89 | 26.01 | 25.91 | 25.59 |
| 3626 | 60.52 | 34.86 | 26.02 | 25.92 | 25.61 |
| 3628 | 60.43 | 34.82 | 25.99 | 25.91 | 25.6  |
| 3630 | 60.33 | 34.76 | 25.96 | 25.92 | 25.61 |
| 3632 | 60.22 | 34.69 | 25.94 | 25.92 | 25.6  |
| 3634 | 60.12 | 34.64 | 25.93 | 25.93 | 25.59 |
| 3636 | 59.99 | 34.58 | 25.92 | 25.94 | 25.59 |
| 3638 | 59.87 | 34.52 | 25.92 | 25.95 | 25.59 |
| 3640 | 59.74 | 34.44 | 25.91 | 25.93 | 25.56 |
| 3642 | 59.63 | 34.38 | 25.91 | 25.94 | 25.56 |
| 3644 | 59.44 | 34.25 | 25.86 | 25.88 | 25.5  |
| 3646 | 59.31 | 34.17 | 25.83 | 25.86 | 25.48 |
| 3648 | 59.15 | 34.08 | 25.8  | 25.82 | 25.43 |
| 3650 | 59    | 34    | 25.77 | 25.81 | 25.42 |
| 3652 | 58.85 | 33.92 | 25.75 | 25.78 | 25.4  |
| 3654 | 58.63 | 33.75 | 25.66 | 25.7  | 25.32 |
| 3656 | 58.49 | 33.69 | 25.64 | 25.69 | 25.32 |
| 3658 | 58.31 | 33.59 | 25.58 | 25.64 | 25.27 |
| 3660 | 58.17 | 33.56 | 25.59 | 25.64 | 25.28 |

|      |       |       |       |       |       |
|------|-------|-------|-------|-------|-------|
| 3662 | 57.98 | 33.45 | 25.54 | 25.61 | 25.24 |
| 3664 | 57.89 | 33.43 | 25.56 | 25.61 | 25.26 |
| 3666 | 57.8  | 33.42 | 25.58 | 25.61 | 25.27 |
| 3668 | 57.68 | 33.39 | 25.58 | 25.62 | 25.28 |
| 3670 | 57.51 | 33.31 | 25.53 | 25.58 | 25.22 |
| 3672 | 57.44 | 33.29 | 25.54 | 25.59 | 25.24 |
| 3674 | 57.33 | 33.25 | 25.52 | 25.56 | 25.21 |
| 3676 | 57.21 | 33.18 | 25.49 | 25.54 | 25.17 |
| 3678 | 57.07 | 33.12 | 25.45 | 25.5  | 25.13 |
| 3680 | 57.02 | 33.14 | 25.5  | 25.54 | 25.17 |
| 3682 | 56.93 | 33.12 | 25.5  | 25.54 | 25.16 |
| 3684 | 56.8  | 33.07 | 25.47 | 25.5  | 25.14 |
| 3686 | 56.7  | 33.04 | 25.46 | 25.49 | 25.12 |
| 3688 | 56.61 | 33    | 25.43 | 25.46 | 25.1  |
| 3690 | 56.55 | 32.96 | 25.41 | 25.44 | 25.09 |
| 3692 | 56.48 | 32.9  | 25.38 | 25.41 | 25.06 |
| 3694 | 56.41 | 32.84 | 25.35 | 25.38 | 25.02 |
| 3696 | 56.35 | 32.78 | 25.3  | 25.36 | 25.01 |
| 3698 | 56.3  | 32.76 | 25.3  | 25.34 | 25    |
| 3700 | 56.21 | 32.72 | 25.3  | 25.33 | 24.97 |
| 3702 | 56.12 | 32.69 | 25.29 | 25.31 | 24.95 |
| 3704 | 56.02 | 32.65 | 25.27 | 25.27 | 24.92 |
| 3706 | 55.95 | 32.66 | 25.29 | 25.28 | 24.93 |
| 3708 | 55.85 | 32.64 | 25.28 | 25.26 | 24.9  |
| 3710 | 55.74 | 32.62 | 25.27 | 25.23 | 24.88 |
| 3712 | 55.63 | 32.59 | 25.27 | 25.21 | 24.86 |
| 3714 | 55.5  | 32.52 | 25.24 | 25.17 | 24.82 |
| 3716 | 55.37 | 32.44 | 25.19 | 25.13 | 24.79 |
| 3718 | 55.28 | 32.39 | 25.16 | 25.1  | 24.75 |
| 3720 | 55.21 | 32.35 | 25.13 | 25.07 | 24.73 |
| 3722 | 55.13 | 32.29 | 25.09 | 25.02 | 24.68 |
| 3724 | 55.08 | 32.27 | 25.09 | 25.02 | 24.69 |
| 3726 | 55.04 | 32.28 | 25.1  | 25.02 | 24.7  |
| 3728 | 55    | 32.29 | 25.09 | 25.01 | 24.69 |
| 3730 | 54.91 | 32.25 | 25.07 | 24.98 | 24.66 |
| 3732 | 54.81 | 32.24 | 25.06 | 24.97 | 24.67 |
| 3734 | 54.71 | 32.21 | 25.06 | 24.97 | 24.65 |
| 3736 | 54.6  | 32.17 | 25.04 | 24.94 | 24.61 |
| 3738 | 54.51 | 32.12 | 25.02 | 24.93 | 24.6  |
| 3740 | 54.38 | 32.06 | 24.99 | 24.91 | 24.58 |
| 3742 | 54.32 | 32.05 | 25.02 | 24.95 | 24.62 |
| 3744 | 54.24 | 32.01 | 25.01 | 24.95 | 24.61 |
| 3746 | 54.16 | 31.96 | 24.97 | 24.94 | 24.59 |
| 3748 | 54.05 | 31.87 | 24.93 | 24.9  | 24.58 |



|      |       |       |       |       |       |
|------|-------|-------|-------|-------|-------|
| 3750 | 53.95 | 31.81 | 24.87 | 24.84 | 24.52 |
| 3752 | 53.94 | 31.83 | 24.89 | 24.86 | 24.54 |
| 3754 | 53.87 | 31.81 | 24.88 | 24.83 | 24.5  |
| 3756 | 53.8  | 31.79 | 24.89 | 24.81 | 24.49 |
| 3758 | 53.76 | 31.81 | 24.94 | 24.82 | 24.5  |
| 3760 | 53.68 | 31.79 | 24.94 | 24.81 | 24.48 |
| 3762 | 53.61 | 31.75 | 24.9  | 24.76 | 24.44 |
| 3764 | 53.58 | 31.75 | 24.92 | 24.77 | 24.44 |
| 3766 | 53.51 | 31.74 | 24.91 | 24.76 | 24.43 |
| 3768 | 53.41 | 31.69 | 24.85 | 24.72 | 24.39 |
| 3770 | 53.33 | 31.66 | 24.84 | 24.7  | 24.36 |
| 3772 | 53.25 | 31.64 | 24.84 | 24.68 | 24.35 |
| 3774 | 53.13 | 31.61 | 24.84 | 24.65 | 24.33 |
| 3776 | 53.06 | 31.62 | 24.88 | 24.69 | 24.36 |
| 3778 | 52.99 | 31.6  | 24.88 | 24.68 | 24.37 |
| 3780 | 52.87 | 31.55 | 24.87 | 24.65 | 24.35 |
| 3782 | 52.76 | 31.51 | 24.85 | 24.62 | 24.31 |
| 3784 | 52.71 | 31.48 | 24.85 | 24.61 | 24.31 |
| 3786 | 52.66 | 31.46 | 24.84 | 24.6  | 24.3  |
| 3788 | 52.6  | 31.41 | 24.82 | 24.59 | 24.29 |
| 3790 | 52.51 | 31.37 | 24.82 | 24.58 | 24.28 |
| 3792 | 52.42 | 31.29 | 24.77 | 24.52 | 24.23 |
| 3794 | 52.35 | 31.26 | 24.75 | 24.51 | 24.22 |
| 3796 | 52.32 | 31.25 | 24.75 | 24.51 | 24.22 |
| 3798 | 52.27 | 31.18 | 24.71 | 24.51 | 24.22 |
| 3800 | 52.2  | 31.12 | 24.68 | 24.48 | 24.19 |
| 3802 | 52.14 | 31.07 | 24.66 | 24.47 | 24.18 |
| 3804 | 52.11 | 31.03 | 24.65 | 24.48 | 24.19 |
| 3806 | 52.06 | 30.97 | 24.6  | 24.44 | 24.15 |
| 3808 | 52.03 | 30.9  | 24.57 | 24.42 | 24.14 |
| 3810 | 52    | 30.85 | 24.55 | 24.41 | 24.13 |
| 3812 | 51.96 | 30.81 | 24.54 | 24.41 | 24.14 |
| 3814 | 51.89 | 30.73 | 24.51 | 24.39 | 24.11 |
| 3816 | 51.86 | 30.68 | 24.49 | 24.38 | 24.11 |
| 3818 | 51.84 | 30.65 | 24.48 | 24.39 | 24.12 |
| 3820 | 51.76 | 30.57 | 24.43 | 24.36 | 24.09 |
| 3822 | 51.7  | 30.49 | 24.39 | 24.35 | 24.08 |
| 3824 | 51.65 | 30.45 | 24.38 | 24.33 | 24.07 |
| 3826 | 51.59 | 30.42 | 24.37 | 24.32 | 24.06 |
| 3828 | 51.54 | 30.4  | 24.37 | 24.33 | 24.07 |
| 3830 | 51.48 | 30.38 | 24.34 | 24.32 | 24.05 |
| 3832 | 51.43 | 30.37 | 24.3  | 24.3  | 24.02 |
| 3834 | 51.38 | 30.35 | 24.29 | 24.3  | 24.02 |
| 3836 | 51.32 | 30.34 | 24.27 | 24.29 | 24.01 |

|      |       |       |       |       |       |
|------|-------|-------|-------|-------|-------|
| 3838 | 51.21 | 30.31 | 24.24 | 24.27 | 23.99 |
| 3840 | 51.1  | 30.29 | 24.2  | 24.24 | 23.97 |
| 3842 | 51    | 30.31 | 24.18 | 24.24 | 23.97 |
| 3844 | 50.87 | 30.32 | 24.16 | 24.23 | 23.96 |
| 3846 | 50.77 | 30.31 | 24.15 | 24.22 | 23.95 |
| 3848 | 50.67 | 30.29 | 24.14 | 24.21 | 23.94 |
| 3850 | 50.58 | 30.29 | 24.14 | 24.21 | 23.93 |
| 3852 | 50.46 | 30.26 | 24.12 | 24.19 | 23.91 |
| 3854 | 50.42 | 30.26 | 24.12 | 24.2  | 23.92 |
| 3856 | 50.33 | 30.21 | 24.07 | 24.14 | 23.88 |
| 3858 | 50.29 | 30.18 | 24.04 | 24.13 | 23.87 |
| 3860 | 50.26 | 30.15 | 24.02 | 24.11 | 23.86 |
| 3862 | 50.22 | 30.12 | 24    | 24.09 | 23.85 |
| 3864 | 50.16 | 30.08 | 23.97 | 24.07 | 23.82 |
| 3866 | 50.12 | 30.04 | 23.96 | 24.04 | 23.8  |
| 3868 | 50.08 | 30.05 | 23.97 | 24.05 | 23.81 |
| 3870 | 50.03 | 30.04 | 23.99 | 24.04 | 23.8  |
| 3872 | 49.98 | 30.01 | 23.98 | 24.02 | 23.78 |
| 3874 | 49.93 | 29.99 | 23.97 | 24    | 23.77 |
| 3876 | 49.87 | 29.95 | 23.96 | 23.99 | 23.76 |
| 3878 | 49.8  | 29.9  | 23.95 | 23.99 | 23.77 |
| 3880 | 49.74 | 29.86 | 23.94 | 24.01 | 23.78 |
| 3882 | 49.68 | 29.82 | 23.95 | 24.03 | 23.81 |
| 3884 | 49.62 | 29.8  | 23.95 | 24.06 | 23.85 |
| 3886 | 49.55 | 29.74 | 23.93 | 24.08 | 23.87 |
| 3888 | 49.5  | 29.74 | 23.93 | 24.11 | 23.9  |
| 3890 | 49.42 | 29.74 | 23.93 | 24.11 | 23.89 |
| 3892 | 49.29 | 29.68 | 23.9  | 24.11 | 23.89 |
| 3894 | 49.2  | 29.68 | 23.9  | 24.14 | 23.89 |
| 3896 | 49.12 | 29.66 | 23.91 | 24.13 | 23.89 |
| 3898 | 49.05 | 29.64 | 23.89 | 24.13 | 23.87 |
| 3900 | 48.99 | 29.62 | 23.89 | 24.12 | 23.86 |
| 3902 | 48.93 | 29.61 | 23.87 | 24.1  | 23.84 |
| 3904 | 48.88 | 29.61 | 23.88 | 24.11 | 23.85 |
| 3906 | 48.81 | 29.58 | 23.85 | 24.08 | 23.82 |
| 3908 | 48.75 | 29.57 | 23.85 | 24.09 | 23.82 |
| 3910 | 48.66 | 29.55 | 23.84 | 24.07 | 23.79 |
| 3912 | 48.55 | 29.51 | 23.81 | 24.04 | 23.77 |
| 3914 | 48.49 | 29.51 | 23.83 | 24.05 | 23.79 |
| 3916 | 48.37 | 29.47 | 23.82 | 24.02 | 23.76 |
| 3918 | 48.25 | 29.41 | 23.78 | 23.99 | 23.71 |
| 3920 | 48.16 | 29.39 | 23.77 | 23.97 | 23.7  |
| 3922 | 48.09 | 29.38 | 23.8  | 23.99 | 23.72 |
| 3924 | 47.99 | 29.36 | 23.77 | 23.96 | 23.7  |

|      |       |       |       |       |       |
|------|-------|-------|-------|-------|-------|
| 3926 | 47.93 | 29.35 | 23.75 | 23.94 | 23.68 |
| 3928 | 47.84 | 29.3  | 23.69 | 23.89 | 23.63 |
| 3930 | 47.82 | 29.31 | 23.7  | 23.9  | 23.64 |
| 3932 | 47.77 | 29.27 | 23.68 | 23.86 | 23.61 |
| 3934 | 47.73 | 29.24 | 23.68 | 23.84 | 23.61 |
| 3936 | 47.68 | 29.22 | 23.67 | 23.84 | 23.6  |
| 3938 | 47.64 | 29.19 | 23.65 | 23.82 | 23.58 |
| 3940 | 47.59 | 29.15 | 23.63 | 23.79 | 23.54 |
| 3942 | 47.54 | 29.11 | 23.6  | 23.75 | 23.51 |
| 3944 | 47.55 | 29.13 | 23.65 | 23.78 | 23.55 |
| 3946 | 47.52 | 29.13 | 23.68 | 23.79 | 23.54 |
| 3948 | 47.49 | 29.11 | 23.68 | 23.78 | 23.53 |
| 3950 | 47.44 | 29.08 | 23.68 | 23.77 | 23.52 |
| 3952 | 47.38 | 29.02 | 23.65 | 23.74 | 23.5  |
| 3954 | 47.34 | 29.02 | 23.68 | 23.75 | 23.5  |
| 3956 | 47.28 | 29    | 23.7  | 23.75 | 23.49 |
| 3958 | 47.22 | 28.95 | 23.7  | 23.73 | 23.49 |
| 3960 | 47.15 | 28.92 | 23.68 | 23.71 | 23.48 |
| 3962 | 47.08 | 28.9  | 23.68 | 23.71 | 23.49 |
| 3964 | 47    | 28.88 | 23.65 | 23.69 | 23.46 |
| 3966 | 46.92 | 28.87 | 23.64 | 23.69 | 23.46 |
| 3968 | 46.88 | 28.87 | 23.63 | 23.7  | 23.45 |
| 3970 | 46.81 | 28.84 | 23.61 | 23.67 | 23.44 |
| 3972 | 46.72 | 28.8  | 23.58 | 23.66 | 23.42 |
| 3974 | 46.65 | 28.79 | 23.58 | 23.68 | 23.44 |
| 3976 | 46.6  | 28.76 | 23.56 | 23.7  | 23.44 |
| 3978 | 46.53 | 28.75 | 23.55 | 23.71 | 23.44 |
| 3980 | 46.46 | 28.73 | 23.54 | 23.7  | 23.43 |
| 3982 | 46.41 | 28.71 | 23.53 | 23.7  | 23.43 |
| 3984 | 46.37 | 28.7  | 23.52 | 23.69 | 23.43 |
| 3986 | 46.31 | 28.65 | 23.49 | 23.67 | 23.4  |
| 3988 | 46.21 | 28.59 | 23.47 | 23.65 | 23.38 |
| 3990 | 46.16 | 28.58 | 23.48 | 23.67 | 23.41 |
| 3992 | 46.08 | 28.55 | 23.48 | 23.67 | 23.4  |
| 3994 | 46.04 | 28.54 | 23.5  | 23.69 | 23.42 |
| 3996 | 45.98 | 28.52 | 23.5  | 23.69 | 23.42 |
| 3998 | 45.94 | 28.5  | 23.5  | 23.69 | 23.41 |
| 4000 | 45.86 | 28.44 | 23.45 | 23.66 | 23.38 |
| 4002 | 45.84 | 28.43 | 23.46 | 23.67 | 23.39 |
| 4004 | 45.8  | 28.45 | 23.46 | 23.68 | 23.4  |
| 4006 | 45.72 | 28.4  | 23.44 | 23.66 | 23.4  |
| 4008 | 45.7  | 28.41 | 23.44 | 23.67 | 23.4  |
| 4010 | 45.68 | 28.46 | 23.49 | 23.7  | 23.45 |
| 4012 | 45.62 | 28.45 | 23.5  | 23.68 | 23.43 |

|      |       |       |       |       |       |
|------|-------|-------|-------|-------|-------|
| 4014 | 45.6  | 28.46 | 23.53 | 23.7  | 23.44 |
| 4016 | 45.54 | 28.44 | 23.53 | 23.71 | 23.44 |
| 4018 | 45.49 | 28.41 | 23.53 | 23.7  | 23.43 |
| 4020 | 45.42 | 28.37 | 23.52 | 23.7  | 23.41 |
| 4022 | 45.35 | 28.33 | 23.51 | 23.68 | 23.41 |
| 4024 | 45.25 | 28.27 | 23.48 | 23.66 | 23.38 |
| 4026 | 45.18 | 28.25 | 23.46 | 23.65 | 23.37 |
| 4028 | 45.12 | 28.25 | 23.47 | 23.67 | 23.38 |
| 4030 | 45.06 | 28.24 | 23.46 | 23.69 | 23.4  |
| 4032 | 45.02 | 28.24 | 23.45 | 23.7  | 23.43 |
| 4034 | 44.97 | 28.2  | 23.43 | 23.68 | 23.41 |
| 4036 | 44.91 | 28.18 | 23.43 | 23.69 | 23.42 |
| 4038 | 44.84 | 28.18 | 23.45 | 23.71 | 23.42 |
| 4040 | 44.77 | 28.17 | 23.45 | 23.7  | 23.42 |
| 4042 | 44.69 | 28.15 | 23.46 | 23.7  | 23.41 |
| 4044 | 44.65 | 28.18 | 23.5  | 23.73 | 23.43 |
| 4046 | 44.57 | 28.17 | 23.51 | 23.72 | 23.41 |
| 4048 | 44.52 | 28.15 | 23.5  | 23.71 | 23.4  |
| 4050 | 44.45 | 28.1  | 23.47 | 23.68 | 23.36 |
| 4052 | 44.42 | 28.11 | 23.49 | 23.69 | 23.38 |
| 4054 | 44.34 | 28.08 | 23.45 | 23.67 | 23.35 |
| 4056 | 44.32 | 28.08 | 23.46 | 23.68 | 23.36 |
| 4058 | 44.28 | 28.07 | 23.45 | 23.67 | 23.37 |
| 4060 | 44.21 | 28.05 | 23.42 | 23.65 | 23.34 |
| 4062 | 44.17 | 28.04 | 23.42 | 23.65 | 23.35 |
| 4064 | 44.13 | 28.04 | 23.42 | 23.65 | 23.35 |
| 4066 | 44.06 | 28.01 | 23.39 | 23.61 | 23.32 |
| 4068 | 44    | 28    | 23.4  | 23.61 | 23.33 |
| 4070 | 43.98 | 28.03 | 23.43 | 23.64 | 23.36 |
| 4072 | 43.91 | 28    | 23.43 | 23.63 | 23.35 |
| 4074 | 43.9  | 28.04 | 23.48 | 23.65 | 23.36 |
| 4076 | 43.86 | 28.04 | 23.5  | 23.66 | 23.36 |
| 4078 | 43.8  | 28.05 | 23.51 | 23.65 | 23.35 |
| 4080 | 43.71 | 28.01 | 23.49 | 23.63 | 23.33 |
| 4082 | 43.66 | 28.01 | 23.49 | 23.65 | 23.32 |
| 4084 | 43.65 | 28.03 | 23.5  | 23.65 | 23.33 |
| 4086 | 43.59 | 28    | 23.47 | 23.63 | 23.31 |
| 4088 | 43.56 | 27.99 | 23.45 | 23.62 | 23.3  |
| 4090 | 43.54 | 27.97 | 23.45 | 23.61 | 23.29 |
| 4092 | 43.52 | 27.94 | 23.44 | 23.61 | 23.28 |
| 4094 | 43.48 | 27.91 | 23.43 | 23.6  | 23.27 |
| 4096 | 43.44 | 27.87 | 23.41 | 23.58 | 23.26 |
| 4098 | 43.37 | 27.83 | 23.36 | 23.54 | 23.23 |
| 4100 | 43.35 | 27.84 | 23.38 | 23.54 | 23.23 |

|      |       |       |       |       |       |
|------|-------|-------|-------|-------|-------|
| 4102 | 43.29 | 27.78 | 23.34 | 23.5  | 23.2  |
| 4104 | 43.26 | 27.76 | 23.33 | 23.5  | 23.21 |
| 4106 | 43.24 | 27.73 | 23.3  | 23.48 | 23.18 |
| 4108 | 43.2  | 27.71 | 23.3  | 23.47 | 23.17 |
| 4110 | 43.16 | 27.69 | 23.29 | 23.47 | 23.17 |
| 4112 | 43.11 | 27.67 | 23.27 | 23.45 | 23.16 |
| 4114 | 43.08 | 27.66 | 23.27 | 23.46 | 23.17 |
| 4116 | 43.05 | 27.65 | 23.29 | 23.46 | 23.17 |
| 4118 | 43.03 | 27.66 | 23.32 | 23.49 | 23.17 |
| 4120 | 42.94 | 27.6  | 23.26 | 23.43 | 23.12 |
| 4122 | 42.89 | 27.59 | 23.25 | 23.41 | 23.11 |
| 4124 | 42.84 | 27.57 | 23.25 | 23.4  | 23.11 |
| 4126 | 42.78 | 27.56 | 23.27 | 23.39 | 23.11 |
| 4128 | 42.74 | 27.55 | 23.28 | 23.38 | 23.09 |
| 4130 | 42.71 | 27.53 | 23.28 | 23.37 | 23.09 |
| 4132 | 42.67 | 27.51 | 23.27 | 23.34 | 23.06 |
| 4134 | 42.57 | 27.44 | 23.23 | 23.29 | 23.02 |
| 4136 | 42.52 | 27.42 | 23.22 | 23.28 | 23.01 |
| 4138 | 42.46 | 27.39 | 23.22 | 23.27 | 23    |
| 4140 | 42.43 | 27.4  | 23.23 | 23.29 | 23.02 |
| 4142 | 42.39 | 27.39 | 23.23 | 23.28 | 23.01 |
| 4144 | 42.33 | 27.36 | 23.23 | 23.25 | 22.99 |
| 4146 | 42.33 | 27.38 | 23.26 | 23.27 | 23.02 |
| 4148 | 42.3  | 27.38 | 23.25 | 23.26 | 23.01 |
| 4150 | 42.32 | 27.4  | 23.28 | 23.3  | 23.05 |
| 4152 | 42.28 | 27.37 | 23.24 | 23.26 | 23    |
| 4154 | 42.25 | 27.34 | 23.21 | 23.23 | 22.98 |
| 4156 | 42.23 | 27.33 | 23.19 | 23.21 | 22.98 |
| 4158 | 42.24 | 27.32 | 23.2  | 23.2  | 22.98 |
| 4160 | 42.24 | 27.3  | 23.18 | 23.2  | 22.97 |
| 4162 | 42.23 | 27.28 | 23.17 | 23.18 | 22.96 |
| 4164 | 42.18 | 27.24 | 23.14 | 23.17 | 22.95 |
| 4166 | 42.18 | 27.23 | 23.15 | 23.17 | 22.95 |
| 4168 | 42.16 | 27.23 | 23.18 | 23.19 | 22.97 |
| 4170 | 42.13 | 27.22 | 23.18 | 23.18 | 22.96 |
| 4172 | 42.1  | 27.2  | 23.18 | 23.17 | 22.96 |
| 4174 | 42.02 | 27.12 | 23.13 | 23.12 | 22.91 |
| 4176 | 42.01 | 27.14 | 23.17 | 23.15 | 22.94 |
| 4178 | 42    | 27.15 | 23.2  | 23.17 | 22.95 |
| 4180 | 41.9  | 27.09 | 23.15 | 23.13 | 22.9  |
| 4182 | 41.86 | 27.08 | 23.16 | 23.12 | 22.91 |
| 4184 | 41.8  | 27.06 | 23.15 | 23.1  | 22.89 |
| 4186 | 41.71 | 27.02 | 23.14 | 23.08 | 22.87 |
| 4188 | 41.66 | 26.99 | 23.14 | 23.08 | 22.86 |

|      |       |       |       |       |       |
|------|-------|-------|-------|-------|-------|
| 4190 | 41.63 | 27.01 | 23.19 | 23.11 | 22.9  |
| 4192 | 41.6  | 27.01 | 23.21 | 23.12 | 22.91 |
| 4194 | 41.57 | 27.01 | 23.21 | 23.11 | 22.9  |
| 4196 | 41.52 | 26.99 | 23.19 | 23.08 | 22.87 |
| 4198 | 41.48 | 26.98 | 23.17 | 23.05 | 22.86 |
| 4200 | 41.45 | 26.96 | 23.17 | 23.06 | 22.86 |
| 4202 | 41.4  | 26.94 | 23.14 | 23.02 | 22.81 |
| 4204 | 41.37 | 26.92 | 23.12 | 23    | 22.8  |
| 4206 | 41.34 | 26.91 | 23.11 | 22.99 | 22.79 |
| 4208 | 41.32 | 26.92 | 23.12 | 22.99 | 22.79 |
| 4210 | 41.29 | 26.9  | 23.09 | 22.95 | 22.75 |
| 4212 | 41.28 | 26.9  | 23.1  | 22.96 | 22.76 |
| 4214 | 41.25 | 26.89 | 23.09 | 22.96 | 22.76 |
| 4216 | 41.21 | 26.87 | 23.07 | 22.95 | 22.75 |
| 4218 | 41.15 | 26.86 | 23.06 | 22.95 | 22.75 |
| 4220 | 41.1  | 26.85 | 23.04 | 22.94 | 22.73 |
| 4222 | 41.08 | 26.87 | 23.06 | 22.96 | 22.76 |
| 4224 | 41.03 | 26.83 | 23.02 | 22.93 | 22.73 |
| 4226 | 40.98 | 26.81 | 23.01 | 22.91 | 22.71 |
| 4228 | 40.93 | 26.79 | 23    | 22.9  | 22.7  |
| 4230 | 40.87 | 26.77 | 22.99 | 22.89 | 22.69 |
| 4232 | 40.87 | 26.8  | 23.03 | 22.92 | 22.73 |
| 4234 | 40.86 | 26.8  | 23.03 | 22.93 | 22.72 |
| 4236 | 40.81 | 26.78 | 23.03 | 22.92 | 22.73 |
| 4238 | 40.71 | 26.68 | 22.94 | 22.83 | 22.64 |
| 4240 | 40.71 | 26.69 | 22.95 | 22.84 | 22.66 |
| 4242 | 40.67 | 26.67 | 22.95 | 22.84 | 22.65 |
| 4244 | 40.61 | 26.63 | 22.91 | 22.81 | 22.62 |
| 4246 | 40.57 | 26.64 | 22.94 | 22.85 | 22.65 |
| 4248 | 40.53 | 26.63 | 22.94 | 22.83 | 22.63 |
| 4250 | 40.48 | 26.62 | 22.94 | 22.82 | 22.62 |
| 4252 | 40.43 | 26.6  | 22.93 | 22.8  | 22.6  |
| 4254 | 40.4  | 26.63 | 22.98 | 22.82 | 22.63 |
| 4256 | 40.37 | 26.66 | 23    | 22.85 | 22.64 |
| 4258 | 40.3  | 26.65 | 23    | 22.82 | 22.62 |
| 4260 | 40.26 | 26.66 | 23.01 | 22.82 | 22.63 |
| 4262 | 40.2  | 26.64 | 22.99 | 22.8  | 22.61 |
| 4264 | 40.18 | 26.65 | 23    | 22.82 | 22.63 |
| 4266 | 40.13 | 26.64 | 22.99 | 22.8  | 22.61 |
| 4268 | 40.09 | 26.62 | 22.98 | 22.79 | 22.6  |
| 4270 | 40.07 | 26.61 | 22.97 | 22.8  | 22.61 |
| 4272 | 39.98 | 26.54 | 22.91 | 22.74 | 22.55 |
| 4274 | 39.96 | 26.53 | 22.9  | 22.74 | 22.55 |
| 4276 | 39.9  | 26.5  | 22.88 | 22.72 | 22.54 |

|      |       |       |       |       |       |
|------|-------|-------|-------|-------|-------|
| 4278 | 39.85 | 26.46 | 22.85 | 22.7  | 22.52 |
| 4280 | 39.82 | 26.45 | 22.84 | 22.69 | 22.5  |
| 4282 | 39.8  | 26.42 | 22.82 | 22.68 | 22.5  |
| 4284 | 39.74 | 26.38 | 22.79 | 22.67 | 22.49 |
| 4286 | 39.73 | 26.37 | 22.8  | 22.66 | 22.47 |
| 4288 | 39.69 | 26.35 | 22.78 | 22.66 | 22.47 |
| 4290 | 39.66 | 26.32 | 22.78 | 22.64 | 22.47 |
| 4292 | 39.62 | 26.3  | 22.78 | 22.63 | 22.46 |
| 4294 | 39.6  | 26.3  | 22.79 | 22.61 | 22.45 |
| 4296 | 39.57 | 26.28 | 22.78 | 22.63 | 22.45 |
| 4298 | 39.54 | 26.25 | 22.77 | 22.61 | 22.43 |
| 4300 | 39.53 | 26.26 | 22.78 | 22.62 | 22.45 |
| 4302 | 39.46 | 26.18 | 22.72 | 22.56 | 22.4  |
| 4304 | 39.45 | 26.17 | 22.72 | 22.59 | 22.41 |
| 4306 | 39.43 | 26.15 | 22.72 | 22.58 | 22.4  |
| 4308 | 39.41 | 26.15 | 22.72 | 22.59 | 22.41 |
| 4310 | 39.39 | 26.14 | 22.73 | 22.58 | 22.39 |
| 4312 | 39.34 | 26.1  | 22.71 | 22.55 | 22.36 |
| 4314 | 39.34 | 26.1  | 22.72 | 22.53 | 22.36 |
| 4316 | 39.3  | 26.1  | 22.73 | 22.54 | 22.36 |
| 4318 | 39.28 | 26.08 | 22.72 | 22.52 | 22.33 |
| 4320 | 39.28 | 26.1  | 22.74 | 22.52 | 22.35 |
| 4322 | 39.26 | 26.09 | 22.75 | 22.52 | 22.33 |
| 4324 | 39.24 | 26.08 | 22.73 | 22.48 | 22.32 |
| 4326 | 39.22 | 26.08 | 22.72 | 22.47 | 22.3  |
| 4328 | 39.22 | 26.08 | 22.72 | 22.49 | 22.31 |
| 4330 | 39.22 | 26.09 | 22.71 | 22.48 | 22.32 |
| 4332 | 39.21 | 26.09 | 22.71 | 22.48 | 22.32 |
| 4334 | 39.18 | 26.09 | 22.7  | 22.48 | 22.32 |
| 4336 | 39.17 | 26.08 | 22.69 | 22.48 | 22.31 |
| 4338 | 39.16 | 26.09 | 22.71 | 22.5  | 22.33 |
| 4340 | 39.16 | 26.1  | 22.72 | 22.53 | 22.34 |
| 4342 | 39.16 | 26.11 | 22.73 | 22.54 | 22.36 |
| 4344 | 39.15 | 26.09 | 22.71 | 22.53 | 22.35 |
| 4346 | 39.11 | 26.05 | 22.7  | 22.52 | 22.34 |
| 4348 | 39.11 | 26.06 | 22.7  | 22.53 | 22.36 |
| 4350 | 39.07 | 26.04 | 22.69 | 22.53 | 22.34 |
| 4352 | 39.04 | 25.99 | 22.66 | 22.51 | 22.33 |
| 4354 | 39.02 | 25.97 | 22.64 | 22.5  | 22.33 |
| 4356 | 38.99 | 25.95 | 22.63 | 22.48 | 22.32 |
| 4358 | 38.99 | 25.96 | 22.65 | 22.49 | 22.34 |
| 4360 | 38.96 | 25.96 | 22.63 | 22.49 | 22.33 |
| 4362 | 38.92 | 25.95 | 22.62 | 22.49 | 22.32 |
| 4364 | 38.89 | 25.94 | 22.62 | 22.48 | 22.32 |

|      |       |       |       |       |       |
|------|-------|-------|-------|-------|-------|
| 4366 | 38.86 | 25.95 | 22.62 | 22.47 | 22.32 |
| 4368 | 38.84 | 25.96 | 22.64 | 22.49 | 22.33 |
| 4370 | 38.82 | 25.97 | 22.64 | 22.49 | 22.32 |
| 4372 | 38.79 | 25.95 | 22.62 | 22.48 | 22.31 |
| 4374 | 38.76 | 25.94 | 22.6  | 22.46 | 22.29 |
| 4376 | 38.76 | 25.95 | 22.6  | 22.46 | 22.3  |
| 4378 | 38.75 | 25.95 | 22.59 | 22.46 | 22.29 |
| 4380 | 38.74 | 25.96 | 22.59 | 22.47 | 22.3  |
| 4382 | 38.72 | 25.93 | 22.56 | 22.45 | 22.29 |
| 4384 | 38.74 | 25.95 | 22.59 | 22.47 | 22.32 |
| 4386 | 38.74 | 25.92 | 22.56 | 22.45 | 22.3  |
| 4388 | 38.72 | 25.89 | 22.54 | 22.42 | 22.28 |
| 4390 | 38.71 | 25.88 | 22.54 | 22.43 | 22.29 |
| 4392 | 38.69 | 25.86 | 22.52 | 22.41 | 22.26 |
| 4394 | 38.69 | 25.86 | 22.51 | 22.43 | 22.26 |
| 4396 | 38.65 | 25.82 | 22.5  | 22.41 | 22.26 |
| 4398 | 38.62 | 25.8  | 22.49 | 22.4  | 22.25 |
| 4400 | 38.59 | 25.78 | 22.49 | 22.4  | 22.25 |
| 4402 | 38.56 | 25.79 | 22.5  | 22.41 | 22.25 |
| 4404 | 38.53 | 25.78 | 22.51 | 22.41 | 22.27 |
| 4406 | 38.52 | 25.79 | 22.53 | 22.44 | 22.3  |
| 4408 | 38.48 | 25.77 | 22.53 | 22.44 | 22.3  |
| 4410 | 38.45 | 25.77 | 22.52 | 22.44 | 22.3  |
| 4412 | 38.42 | 25.75 | 22.5  | 22.42 | 22.27 |
| 4414 | 38.38 | 25.71 | 22.45 | 22.39 | 22.24 |
| 4416 | 38.35 | 25.69 | 22.43 | 22.36 | 22.22 |
| 4418 | 38.34 | 25.7  | 22.43 | 22.36 | 22.23 |
| 4420 | 38.31 | 25.7  | 22.42 | 22.36 | 22.22 |
| 4422 | 38.29 | 25.69 | 22.41 | 22.35 | 22.21 |
| 4424 | 38.24 | 25.67 | 22.4  | 22.34 | 22.2  |
| 4426 | 38.2  | 25.66 | 22.39 | 22.33 | 22.19 |
| 4428 | 38.18 | 25.67 | 22.39 | 22.34 | 22.19 |
| 4430 | 38.13 | 25.66 | 22.4  | 22.35 | 22.2  |
| 4432 | 38.12 | 25.67 | 22.4  | 22.35 | 22.2  |
| 4434 | 38.08 | 25.66 | 22.4  | 22.34 | 22.19 |
| 4436 | 38.08 | 25.7  | 22.42 | 22.36 | 22.21 |
| 4438 | 38.04 | 25.71 | 22.42 | 22.37 | 22.21 |
| 4440 | 38    | 25.68 | 22.41 | 22.35 | 22.2  |
| 4442 | 37.94 | 25.65 | 22.39 | 22.31 | 22.18 |
| 4444 | 37.9  | 25.63 | 22.37 | 22.3  | 22.15 |
| 4446 | 37.87 | 25.64 | 22.37 | 22.29 | 22.15 |
| 4448 | 37.83 | 25.64 | 22.38 | 22.28 | 22.15 |
| 4450 | 37.78 | 25.64 | 22.39 | 22.28 | 22.14 |
| 4452 | 37.74 | 25.65 | 22.4  | 22.29 | 22.15 |



|      |       |       |       |       |       |
|------|-------|-------|-------|-------|-------|
| 4454 | 37.69 | 25.65 | 22.4  | 22.29 | 22.15 |
| 4456 | 37.66 | 25.65 | 22.42 | 22.31 | 22.16 |
| 4458 | 37.61 | 25.64 | 22.4  | 22.28 | 22.14 |
| 4460 | 37.52 | 25.62 | 22.37 | 22.27 | 22.13 |
| 4462 | 37.5  | 25.63 | 22.38 | 22.26 | 22.13 |
| 4464 | 37.45 | 25.61 | 22.36 | 22.25 | 22.1  |
| 4466 | 37.43 | 25.6  | 22.35 | 22.24 | 22.1  |
| 4468 | 37.45 | 25.63 | 22.36 | 22.26 | 22.12 |
| 4470 | 37.45 | 25.63 | 22.37 | 22.26 | 22.14 |
| 4472 | 37.42 | 25.61 | 22.34 | 22.23 | 22.12 |
| 4474 | 37.41 | 25.61 | 22.34 | 22.26 | 22.14 |
| 4476 | 37.38 | 25.6  | 22.33 | 22.26 | 22.13 |
| 4478 | 37.37 | 25.61 | 22.33 | 22.26 | 22.13 |
| 4480 | 37.33 | 25.58 | 22.32 | 22.25 | 22.11 |
| 4482 | 37.32 | 25.59 | 22.33 | 22.26 | 22.13 |
| 4484 | 37.3  | 25.59 | 22.34 | 22.28 | 22.14 |
| 4486 | 37.22 | 25.52 | 22.29 | 22.23 | 22.09 |
| 4488 | 37.2  | 25.53 | 22.3  | 22.23 | 22.09 |
| 4490 | 37.16 | 25.49 | 22.27 | 22.21 | 22.06 |
| 4492 | 37.11 | 25.47 | 22.26 | 22.19 | 22.04 |
| 4494 | 37.09 | 25.46 | 22.27 | 22.21 | 22.06 |
| 4496 | 37.06 | 25.44 | 22.27 | 22.21 | 22.06 |
| 4498 | 37.03 | 25.44 | 22.28 | 22.23 | 22.08 |
| 4500 | 36.99 | 25.41 | 22.27 | 22.21 | 22.06 |
| 4502 | 36.95 | 25.39 | 22.26 | 22.21 | 22.05 |
| 4504 | 36.93 | 25.4  | 22.26 | 22.21 | 22.05 |
| 4506 | 36.91 | 25.41 | 22.29 | 22.24 | 22.07 |
| 4508 | 36.88 | 25.39 | 22.29 | 22.24 | 22.07 |
| 4510 | 36.88 | 25.4  | 22.29 | 22.24 | 22.08 |
| 4512 | 36.87 | 25.41 | 22.29 | 22.25 | 22.09 |
| 4514 | 36.85 | 25.42 | 22.29 | 22.25 | 22.09 |
| 4516 | 36.81 | 25.41 | 22.27 | 22.24 | 22.07 |
| 4518 | 36.8  | 25.41 | 22.27 | 22.24 | 22.08 |
| 4520 | 36.77 | 25.4  | 22.27 | 22.23 | 22.08 |
| 4522 | 36.72 | 25.37 | 22.23 | 22.19 | 22.04 |
| 4524 | 36.71 | 25.38 | 22.26 | 22.22 | 22.06 |
| 4526 | 36.68 | 25.37 | 22.25 | 22.21 | 22.05 |
| 4528 | 36.65 | 25.35 | 22.24 | 22.19 | 22.04 |
| 4530 | 36.61 | 25.34 | 22.25 | 22.2  | 22.05 |
| 4532 | 36.58 | 25.32 | 22.25 | 22.19 | 22.03 |
| 4534 | 36.59 | 25.36 | 22.29 | 22.23 | 22.07 |
| 4536 | 36.54 | 25.33 | 22.26 | 22.19 | 22.04 |
| 4538 | 36.51 | 25.34 | 22.29 | 22.22 | 22.07 |
| 4540 | 36.48 | 25.33 | 22.29 | 22.22 | 22.07 |

|      |       |       |       |       |       |
|------|-------|-------|-------|-------|-------|
| 4542 | 36.46 | 25.31 | 22.29 | 22.22 | 22.07 |
| 4544 | 36.42 | 25.28 | 22.27 | 22.2  | 22.03 |
| 4546 | 36.4  | 25.28 | 22.28 | 22.2  | 22.05 |
| 4548 | 36.39 | 25.27 | 22.29 | 22.22 | 22.06 |
| 4550 | 36.38 | 25.26 | 22.29 | 22.21 | 22.05 |
| 4552 | 36.37 | 25.24 | 22.29 | 22.22 | 22.05 |
| 4554 | 36.35 | 25.23 | 22.28 | 22.21 | 22.05 |
| 4556 | 36.32 | 25.22 | 22.28 | 22.21 | 22.06 |
| 4558 | 36.3  | 25.21 | 22.28 | 22.22 | 22.05 |
| 4560 | 36.28 | 25.2  | 22.27 | 22.23 | 22.06 |
| 4562 | 36.26 | 25.19 | 22.28 | 22.22 | 22.06 |
| 4564 | 36.2  | 25.14 | 22.24 | 22.18 | 22.03 |
| 4566 | 36.19 | 25.12 | 22.21 | 22.16 | 22    |
| 4568 | 36.2  | 25.14 | 22.23 | 22.17 | 22.03 |
| 4570 | 36.2  | 25.14 | 22.24 | 22.18 | 22.05 |
| 4572 | 36.17 | 25.13 | 22.25 | 22.19 | 22.05 |
| 4574 | 36.15 | 25.11 | 22.24 | 22.18 | 22.05 |
| 4576 | 36.13 | 25.09 | 22.23 | 22.18 | 22.04 |
| 4578 | 36.1  | 25.06 | 22.21 | 22.17 | 22.02 |
| 4580 | 36.07 | 25.03 | 22.18 | 22.15 | 21.99 |
| 4582 | 36.07 | 25.03 | 22.19 | 22.15 | 22    |
| 4584 | 36.06 | 25.02 | 22.18 | 22.15 | 22.01 |
| 4586 | 36.05 | 25    | 22.17 | 22.14 | 22    |
| 4588 | 36.03 | 24.98 | 22.16 | 22.14 | 22    |
| 4590 | 36.04 | 24.98 | 22.16 | 22.15 | 22.01 |
| 4592 | 36.03 | 24.95 | 22.16 | 22.15 | 22.01 |
| 4594 | 36.03 | 24.93 | 22.15 | 22.15 | 22    |
| 4596 | 36    | 24.91 | 22.15 | 22.14 | 21.98 |
| 4598 | 35.98 | 24.9  | 22.16 | 22.13 | 21.99 |
| 4600 | 35.97 | 24.9  | 22.17 | 22.15 | 21.99 |
| 4602 | 35.94 | 24.9  | 22.17 | 22.14 | 21.99 |
| 4604 | 35.91 | 24.89 | 22.15 | 22.14 | 21.97 |
| 4606 | 35.91 | 24.9  | 22.15 | 22.14 | 21.98 |
| 4608 | 35.89 | 24.89 | 22.14 | 22.13 | 21.99 |
| 4610 | 35.89 | 24.88 | 22.15 | 22.14 | 21.98 |
| 4612 | 35.86 | 24.87 | 22.14 | 22.12 | 21.96 |
| 4614 | 35.8  | 24.83 | 22.1  | 22.08 | 21.93 |
| 4616 | 35.8  | 24.84 | 22.12 | 22.11 | 21.95 |
| 4618 | 35.78 | 24.84 | 22.13 | 22.1  | 21.96 |
| 4620 | 35.74 | 24.84 | 22.12 | 22.1  | 21.95 |
| 4622 | 35.7  | 24.83 | 22.11 | 22.1  | 21.95 |
| 4624 | 35.65 | 24.8  | 22.1  | 22.06 | 21.92 |
| 4626 | 35.62 | 24.78 | 22.08 | 22.05 | 21.91 |
| 4628 | 35.59 | 24.77 | 22.06 | 22.04 | 21.89 |

|      |       |       |       |       |       |
|------|-------|-------|-------|-------|-------|
| 4630 | 35.58 | 24.76 | 22.09 | 22.07 | 21.92 |
| 4632 | 35.53 | 24.75 | 22.08 | 22.05 | 21.9  |
| 4634 | 35.54 | 24.76 | 22.1  | 22.07 | 21.92 |
| 4636 | 35.49 | 24.72 | 22.07 | 22.05 | 21.9  |
| 4638 | 35.49 | 24.72 | 22.06 | 22.05 | 21.92 |
| 4640 | 35.46 | 24.7  | 22.05 | 22.03 | 21.89 |
| 4642 | 35.43 | 24.69 | 22.08 | 22.05 | 21.92 |
| 4644 | 35.41 | 24.68 | 22.08 | 22.06 | 21.91 |
| 4646 | 35.37 | 24.65 | 22.05 | 22.03 | 21.9  |
| 4648 | 35.35 | 24.63 | 22.04 | 22.03 | 21.91 |
| 4650 | 35.34 | 24.63 | 22.04 | 22.03 | 21.9  |
| 4652 | 35.32 | 24.62 | 22.05 | 22.03 | 21.91 |
| 4654 | 35.28 | 24.62 | 22.06 | 22.02 | 21.89 |
| 4656 | 35.28 | 24.63 | 22.09 | 22.03 | 21.9  |
| 4658 | 35.22 | 24.61 | 22.08 | 22.02 | 21.9  |
| 4660 | 35.25 | 24.65 | 22.12 | 22.06 | 21.94 |
| 4662 | 35.22 | 24.64 | 22.12 | 22.04 | 21.92 |
| 4664 | 35.22 | 24.65 | 22.13 | 22.06 | 21.94 |
| 4666 | 35.22 | 24.67 | 22.14 | 22.08 | 21.94 |
| 4668 | 35.2  | 24.65 | 22.14 | 22.07 | 21.93 |
| 4670 | 35.19 | 24.67 | 22.17 | 22.09 | 21.94 |
| 4672 | 35.18 | 24.68 | 22.16 | 22.1  | 21.95 |
| 4674 | 35.17 | 24.67 | 22.17 | 22.1  | 21.94 |
| 4676 | 35.16 | 24.67 | 22.17 | 22.11 | 21.95 |
| 4678 | 35.12 | 24.66 | 22.15 | 22.09 | 21.94 |
| 4680 | 35.11 | 24.67 | 22.18 | 22.11 | 21.96 |
| 4682 | 35.09 | 24.68 | 22.21 | 22.13 | 21.97 |
| 4684 | 35.08 | 24.69 | 22.23 | 22.12 | 21.97 |
| 4686 | 35.04 | 24.7  | 22.24 | 22.12 | 21.96 |
| 4688 | 35.02 | 24.71 | 22.26 | 22.13 | 21.98 |
| 4690 | 35.01 | 24.71 | 22.26 | 22.13 | 21.97 |
| 4692 | 34.96 | 24.69 | 22.25 | 22.11 | 21.97 |
| 4694 | 34.93 | 24.68 | 22.26 | 22.1  | 21.96 |
| 4696 | 34.92 | 24.68 | 22.26 | 22.11 | 21.95 |
| 4698 | 34.89 | 24.65 | 22.26 | 22.11 | 21.96 |
| 4700 | 34.87 | 24.65 | 22.24 | 22.09 | 21.94 |
| 4702 | 34.86 | 24.63 | 22.22 | 22.07 | 21.92 |
| 4704 | 34.84 | 24.63 | 22.22 | 22.07 | 21.92 |
| 4706 | 34.81 | 24.6  | 22.19 | 22.05 | 21.91 |
| 4708 | 34.83 | 24.62 | 22.22 | 22.07 | 21.92 |
| 4710 | 34.81 | 24.62 | 22.22 | 22.06 | 21.92 |
| 4712 | 34.79 | 24.62 | 22.21 | 22.07 | 21.92 |
| 4714 | 34.76 | 24.6  | 22.2  | 22.06 | 21.92 |
| 4716 | 34.74 | 24.59 | 22.19 | 22.07 | 21.92 |

|      |       |       |       |       |       |
|------|-------|-------|-------|-------|-------|
| 4718 | 34.71 | 24.58 | 22.19 | 22.07 | 21.93 |
| 4720 | 34.7  | 24.59 | 22.21 | 22.09 | 21.94 |
| 4722 | 34.67 | 24.56 | 22.19 | 22.07 | 21.92 |
| 4724 | 34.62 | 24.53 | 22.16 | 22.05 | 21.9  |
| 4726 | 34.6  | 24.54 | 22.17 | 22.07 | 21.93 |
| 4728 | 34.56 | 24.52 | 22.17 | 22.05 | 21.92 |
| 4730 | 34.56 | 24.53 | 22.19 | 22.07 | 21.93 |
| 4732 | 34.54 | 24.53 | 22.19 | 22.07 | 21.93 |
| 4734 | 34.54 | 24.56 | 22.21 | 22.09 | 21.95 |
| 4736 | 34.52 | 24.56 | 22.22 | 22.08 | 21.94 |
| 4738 | 34.48 | 24.53 | 22.19 | 22.05 | 21.93 |
| 4740 | 34.47 | 24.55 | 22.2  | 22.06 | 21.93 |
| 4742 | 34.41 | 24.52 | 22.18 | 22.03 | 21.9  |
| 4744 | 34.38 | 24.49 | 22.15 | 22    | 21.87 |
| 4746 | 34.35 | 24.48 | 22.13 | 21.99 | 21.84 |
| 4748 | 34.31 | 24.47 | 22.13 | 21.98 | 21.83 |
| 4750 | 34.31 | 24.49 | 22.16 | 21.99 | 21.85 |
| 4752 | 34.31 | 24.49 | 22.16 | 21.99 | 21.85 |
| 4754 | 34.29 | 24.49 | 22.15 | 21.97 | 21.83 |
| 4756 | 34.29 | 24.5  | 22.17 | 21.99 | 21.85 |
| 4758 | 34.29 | 24.5  | 22.17 | 21.99 | 21.85 |
| 4760 | 34.29 | 24.51 | 22.18 | 22    | 21.85 |
| 4762 | 34.26 | 24.49 | 22.18 | 22.01 | 21.86 |
| 4764 | 34.25 | 24.48 | 22.17 | 22    | 21.86 |
| 4766 | 34.23 | 24.49 | 22.17 | 22.01 | 21.88 |
| 4768 | 34.22 | 24.47 | 22.16 | 22    | 21.87 |
| 4770 | 34.2  | 24.47 | 22.17 | 22    | 21.87 |
| 4772 | 34.16 | 24.44 | 22.15 | 21.98 | 21.85 |
| 4774 | 34.13 | 24.42 | 22.14 | 21.96 | 21.84 |
| 4776 | 34.1  | 24.4  | 22.12 | 21.96 | 21.84 |
| 4778 | 34.09 | 24.41 | 22.14 | 21.98 | 21.85 |
| 4780 | 34.08 | 24.4  | 22.13 | 21.98 | 21.85 |
| 4782 | 34.08 | 24.42 | 22.15 | 22.01 | 21.86 |
| 4784 | 34.06 | 24.43 | 22.16 | 22.02 | 21.86 |
| 4786 | 34.05 | 24.43 | 22.16 | 22.01 | 21.87 |
| 4788 | 34.01 | 24.38 | 22.13 | 22    | 21.85 |
| 4790 | 33.96 | 24.37 | 22.12 | 21.99 | 21.84 |
| 4792 | 33.97 | 24.4  | 22.14 | 22.02 | 21.86 |
| 4794 | 33.95 | 24.4  | 22.12 | 22    | 21.85 |
| 4796 | 33.89 | 24.38 | 22.1  | 21.98 | 21.82 |
| 4798 | 33.87 | 24.38 | 22.11 | 21.99 | 21.84 |
| 4800 | 33.86 | 24.36 | 22.08 | 21.97 | 21.82 |
| 4802 | 33.82 | 24.35 | 22.07 | 21.96 | 21.83 |
| 4804 | 33.85 | 24.4  | 22.1  | 22    | 21.85 |

|      |       |       |       |       |       |
|------|-------|-------|-------|-------|-------|
| 4806 | 33.84 | 24.4  | 22.1  | 22    | 21.85 |
| 4808 | 33.8  | 24.37 | 22.06 | 21.96 | 21.81 |
| 4810 | 33.77 | 24.33 | 22.02 | 21.93 | 21.79 |
| 4812 | 33.75 | 24.32 | 22.02 | 21.92 | 21.78 |
| 4814 | 33.74 | 24.32 | 22.01 | 21.91 | 21.78 |
| 4816 | 33.73 | 24.34 | 22.02 | 21.92 | 21.79 |
| 4818 | 33.74 | 24.35 | 22.01 | 21.92 | 21.8  |
| 4820 | 33.7  | 24.3  | 21.96 | 21.88 | 21.76 |
| 4822 | 33.7  | 24.32 | 21.97 | 21.89 | 21.77 |
| 4824 | 33.72 | 24.35 | 21.99 | 21.92 | 21.79 |
| 4826 | 33.7  | 24.33 | 21.97 | 21.91 | 21.79 |
| 4828 | 33.67 | 24.31 | 21.95 | 21.89 | 21.76 |
| 4830 | 33.66 | 24.32 | 21.97 | 21.91 | 21.78 |
| 4832 | 33.62 | 24.28 | 21.94 | 21.89 | 21.76 |
| 4834 | 33.59 | 24.28 | 21.93 | 21.88 | 21.75 |
| 4836 | 33.55 | 24.28 | 21.94 | 21.89 | 21.76 |
| 4838 | 33.53 | 24.28 | 21.94 | 21.89 | 21.76 |
| 4840 | 33.51 | 24.29 | 21.93 | 21.89 | 21.75 |
| 4842 | 33.48 | 24.27 | 21.92 | 21.86 | 21.73 |
| 4844 | 33.45 | 24.24 | 21.89 | 21.84 | 21.72 |
| 4846 | 33.44 | 24.23 | 21.89 | 21.84 | 21.73 |
| 4848 | 33.42 | 24.22 | 21.88 | 21.83 | 21.73 |
| 4850 | 33.41 | 24.21 | 21.89 | 21.83 | 21.72 |
| 4852 | 33.39 | 24.2  | 21.89 | 21.83 | 21.72 |
| 4854 | 33.37 | 24.18 | 21.88 | 21.83 | 21.72 |
| 4856 | 33.33 | 24.15 | 21.87 | 21.83 | 21.72 |
| 4858 | 33.38 | 24.2  | 21.9  | 21.86 | 21.75 |
| 4860 | 33.37 | 24.2  | 21.9  | 21.86 | 21.74 |
| 4862 | 33.38 | 24.21 | 21.94 | 21.89 | 21.77 |
| 4864 | 33.36 | 24.2  | 21.92 | 21.87 | 21.76 |
| 4866 | 33.35 | 24.2  | 21.94 | 21.88 | 21.77 |
| 4868 | 33.31 | 24.17 | 21.91 | 21.86 | 21.74 |
| 4870 | 33.33 | 24.19 | 21.92 | 21.84 | 21.73 |
| 4872 | 33.3  | 24.15 | 21.89 | 21.83 | 21.72 |
| 4874 | 33.31 | 24.17 | 21.9  | 21.86 | 21.74 |
| 4876 | 33.29 | 24.13 | 21.88 | 21.84 | 21.73 |
| 4878 | 33.27 | 24.11 | 21.86 | 21.81 | 21.71 |
| 4880 | 33.26 | 24.11 | 21.86 | 21.81 | 21.7  |
| 4882 | 33.27 | 24.12 | 21.89 | 21.84 | 21.74 |
| 4884 | 33.25 | 24.09 | 21.86 | 21.82 | 21.71 |
| 4886 | 33.26 | 24.11 | 21.87 | 21.83 | 21.73 |
| 4888 | 33.25 | 24.13 | 21.91 | 21.85 | 21.74 |
| 4890 | 33.26 | 24.14 | 21.91 | 21.87 | 21.76 |
| 4892 | 33.21 | 24.11 | 21.88 | 21.83 | 21.72 |

|      |       |       |       |       |       |
|------|-------|-------|-------|-------|-------|
| 4894 | 33.18 | 24.08 | 21.86 | 21.81 | 21.7  |
| 4896 | 33.19 | 24.11 | 21.9  | 21.83 | 21.73 |
| 4898 | 33.17 | 24.12 | 21.93 | 21.83 | 21.73 |
| 4900 | 33.11 | 24.09 | 21.89 | 21.81 | 21.72 |
| 4902 | 33.11 | 24.08 | 21.9  | 21.83 | 21.73 |
| 4904 | 33.1  | 24.08 | 21.89 | 21.81 | 21.73 |
| 4906 | 33.06 | 24.06 | 21.87 | 21.79 | 21.71 |
| 4908 | 33.06 | 24.07 | 21.87 | 21.79 | 21.71 |
| 4910 | 33.06 | 24.09 | 21.9  | 21.81 | 21.72 |
| 4912 | 33.06 | 24.11 | 21.93 | 21.84 | 21.75 |
| 4914 | 33.04 | 24.1  | 21.93 | 21.84 | 21.74 |
| 4916 | 33.01 | 24.09 | 21.92 | 21.83 | 21.74 |
| 4918 | 32.99 | 24.09 | 21.91 | 21.84 | 21.73 |
| 4920 | 32.98 | 24.09 | 21.93 | 21.85 | 21.75 |
| 4922 | 32.97 | 24.09 | 21.92 | 21.86 | 21.75 |
| 4924 | 32.92 | 24.06 | 21.89 | 21.83 | 21.72 |
| 4926 | 32.9  | 24.06 | 21.89 | 21.82 | 21.72 |
| 4928 | 32.92 | 24.07 | 21.92 | 21.86 | 21.74 |
| 4930 | 32.88 | 24.06 | 21.9  | 21.85 | 21.74 |
| 4932 | 32.85 | 24.02 | 21.87 | 21.81 | 21.7  |
| 4934 | 32.82 | 24    | 21.85 | 21.8  | 21.69 |
| 4936 | 32.82 | 24    | 21.86 | 21.8  | 21.71 |
| 4938 | 32.78 | 23.98 | 21.84 | 21.78 | 21.69 |
| 4940 | 32.83 | 24.02 | 21.89 | 21.83 | 21.74 |
| 4942 | 32.81 | 24    | 21.87 | 21.82 | 21.72 |
| 4944 | 32.77 | 23.96 | 21.83 | 21.79 | 21.7  |
| 4946 | 32.75 | 23.94 | 21.82 | 21.77 | 21.69 |
| 4948 | 32.73 | 23.93 | 21.81 | 21.77 | 21.67 |
| 4950 | 32.73 | 23.92 | 21.82 | 21.78 | 21.67 |
| 4952 | 32.7  | 23.91 | 21.8  | 21.76 | 21.65 |
| 4954 | 32.73 | 23.93 | 21.85 | 21.8  | 21.68 |
| 4956 | 32.72 | 23.94 | 21.86 | 21.81 | 21.7  |
| 4958 | 32.68 | 23.89 | 21.83 | 21.78 | 21.68 |
| 4960 | 32.66 | 23.88 | 21.83 | 21.77 | 21.66 |
| 4962 | 32.66 | 23.9  | 21.84 | 21.79 | 21.69 |
| 4964 | 32.64 | 23.9  | 21.85 | 21.8  | 21.69 |
| 4966 | 32.64 | 23.89 | 21.86 | 21.81 | 21.71 |
| 4968 | 32.63 | 23.88 | 21.86 | 21.79 | 21.7  |
| 4970 | 32.61 | 23.89 | 21.87 | 21.8  | 21.71 |
| 4972 | 32.62 | 23.91 | 21.89 | 21.81 | 21.72 |
| 4974 | 32.58 | 23.89 | 21.87 | 21.79 | 21.71 |
| 4976 | 32.57 | 23.9  | 21.87 | 21.8  | 21.71 |
| 4978 | 32.58 | 23.91 | 21.89 | 21.81 | 21.72 |
| 4980 | 32.57 | 23.9  | 21.89 | 21.81 | 21.72 |

|      |       |       |       |       |       |
|------|-------|-------|-------|-------|-------|
| 4982 | 32.51 | 23.84 | 21.84 | 21.76 | 21.67 |
| 4984 | 32.49 | 23.82 | 21.82 | 21.74 | 21.65 |
| 4986 | 32.48 | 23.83 | 21.83 | 21.76 | 21.67 |
| 4988 | 32.47 | 23.82 | 21.83 | 21.75 | 21.66 |
| 4990 | 32.43 | 23.8  | 21.82 | 21.74 | 21.65 |
| 4992 | 32.42 | 23.8  | 21.83 | 21.76 | 21.67 |
| 4994 | 32.42 | 23.82 | 21.85 | 21.77 | 21.69 |
| 4996 | 32.41 | 23.84 | 21.87 | 21.79 | 21.69 |
| 4998 | 32.38 | 23.81 | 21.85 | 21.78 | 21.68 |
| 5000 | 32.37 | 23.82 | 21.87 | 21.78 | 21.69 |
| 5002 | 32.35 | 23.82 | 21.89 | 21.8  | 21.7  |
| 5004 | 32.33 | 23.81 | 21.89 | 21.8  | 21.69 |
| 5006 | 32.3  | 23.8  | 21.87 | 21.79 | 21.68 |
| 5008 | 32.28 | 23.79 | 21.87 | 21.76 | 21.66 |
| 5010 | 32.27 | 23.79 | 21.88 | 21.78 | 21.68 |
| 5012 | 32.21 | 23.74 | 21.85 | 21.76 | 21.65 |
| 5014 | 32.23 | 23.79 | 21.87 | 21.78 | 21.68 |
| 5016 | 32.19 | 23.76 | 21.85 | 21.76 | 21.67 |
| 5018 | 32.18 | 23.76 | 21.86 | 21.75 | 21.66 |
| 5020 | 32.16 | 23.76 | 21.87 | 21.76 | 21.68 |
| 5022 | 32.13 | 23.75 | 21.86 | 21.75 | 21.68 |
| 5024 | 32.11 | 23.74 | 21.86 | 21.75 | 21.67 |
| 5026 | 32.09 | 23.74 | 21.86 | 21.75 | 21.67 |
| 5028 | 32.07 | 23.74 | 21.85 | 21.75 | 21.67 |
| 5030 | 32.03 | 23.7  | 21.83 | 21.73 | 21.65 |
| 5032 | 32.03 | 23.72 | 21.85 | 21.74 | 21.65 |
| 5034 | 32.02 | 23.72 | 21.86 | 21.74 | 21.66 |
| 5036 | 31.99 | 23.71 | 21.85 | 21.74 | 21.66 |
| 5038 | 31.98 | 23.71 | 21.86 | 21.74 | 21.66 |
| 5040 | 31.96 | 23.72 | 21.87 | 21.75 | 21.65 |
| 5042 | 31.94 | 23.71 | 21.86 | 21.74 | 21.64 |
| 5044 | 31.94 | 23.72 | 21.87 | 21.75 | 21.64 |
| 5046 | 31.89 | 23.71 | 21.87 | 21.73 | 21.63 |
| 5048 | 31.87 | 23.7  | 21.85 | 21.71 | 21.62 |
| 5050 | 31.83 | 23.68 | 21.83 | 21.71 | 21.61 |
| 5052 | 31.85 | 23.7  | 21.87 | 21.74 | 21.64 |
| 5054 | 31.83 | 23.69 | 21.86 | 21.73 | 21.64 |
| 5056 | 31.77 | 23.66 | 21.83 | 21.69 | 21.6  |
| 5058 | 31.79 | 23.69 | 21.85 | 21.72 | 21.63 |
| 5060 | 31.76 | 23.66 | 21.83 | 21.68 | 21.6  |
| 5062 | 31.77 | 23.68 | 21.84 | 21.7  | 21.62 |
| 5064 | 31.78 | 23.69 | 21.85 | 21.72 | 21.64 |
| 5066 | 31.77 | 23.68 | 21.86 | 21.72 | 21.63 |
| 5068 | 31.76 | 23.69 | 21.86 | 21.71 | 21.63 |

|      |       |       |       |       |       |
|------|-------|-------|-------|-------|-------|
| 5070 | 31.75 | 23.69 | 21.87 | 21.71 | 21.63 |
| 5072 | 31.75 | 23.68 | 21.86 | 21.71 | 21.61 |
| 5074 | 31.75 | 23.7  | 21.88 | 21.72 | 21.62 |
| 5076 | 31.73 | 23.7  | 21.88 | 21.71 | 21.62 |
| 5078 | 31.71 | 23.69 | 21.89 | 21.71 | 21.62 |
| 5080 | 31.7  | 23.69 | 21.88 | 21.72 | 21.62 |
| 5082 | 31.69 | 23.69 | 21.88 | 21.72 | 21.62 |
| 5084 | 31.62 | 23.63 | 21.84 | 21.66 | 21.56 |
| 5086 | 31.65 | 23.66 | 21.85 | 21.68 | 21.59 |
| 5088 | 31.65 | 23.67 | 21.88 | 21.71 | 21.63 |
| 5090 | 31.61 | 23.64 | 21.85 | 21.68 | 21.62 |
| 5092 | 31.63 | 23.65 | 21.87 | 21.7  | 21.62 |
| 5094 | 31.59 | 23.62 | 21.84 | 21.69 | 21.62 |
| 5096 | 31.58 | 23.61 | 21.85 | 21.69 | 21.61 |
| 5098 | 31.57 | 23.62 | 21.85 | 21.7  | 21.62 |
| 5100 | 31.55 | 23.61 | 21.84 | 21.69 | 21.61 |
| 5102 | 31.54 | 23.6  | 21.85 | 21.69 | 21.61 |
| 5104 | 31.52 | 23.6  | 21.83 | 21.69 | 21.6  |
| 5106 | 31.51 | 23.6  | 21.84 | 21.7  | 21.6  |
| 5108 | 31.52 | 23.62 | 21.87 | 21.72 | 21.62 |
| 5110 | 31.48 | 23.6  | 21.84 | 21.69 | 21.59 |
| 5112 | 31.54 | 23.67 | 21.9  | 21.76 | 21.64 |
| 5114 | 31.54 | 23.67 | 21.9  | 21.76 | 21.65 |
| 5116 | 31.49 | 23.63 | 21.85 | 21.72 | 21.61 |
| 5118 | 31.52 | 23.67 | 21.89 | 21.75 | 21.65 |
| 5120 | 31.51 | 23.64 | 21.87 | 21.73 | 21.65 |
| 5122 | 31.48 | 23.63 | 21.85 | 21.73 | 21.64 |
| 5124 | 31.45 | 23.61 | 21.82 | 21.7  | 21.6  |
| 5126 | 31.44 | 23.6  | 21.82 | 21.69 | 21.59 |
| 5128 | 31.43 | 23.6  | 21.82 | 21.69 | 21.6  |
| 5130 | 31.44 | 23.63 | 21.85 | 21.73 | 21.63 |
| 5132 | 31.43 | 23.62 | 21.84 | 21.72 | 21.63 |
| 5134 | 31.43 | 23.62 | 21.84 | 21.73 | 21.63 |
| 5136 | 31.43 | 23.63 | 21.85 | 21.74 | 21.64 |
| 5138 | 31.42 | 23.62 | 21.85 | 21.74 | 21.64 |
| 5140 | 31.4  | 23.63 | 21.84 | 21.75 | 21.65 |
| 5142 | 31.41 | 23.63 | 21.87 | 21.77 | 21.67 |
| 5144 | 31.37 | 23.61 | 21.85 | 21.75 | 21.66 |
| 5146 | 31.36 | 23.6  | 21.85 | 21.75 | 21.65 |
| 5148 | 31.34 | 23.6  | 21.84 | 21.75 | 21.64 |
| 5150 | 31.32 | 23.59 | 21.84 | 21.75 | 21.64 |
| 5152 | 31.32 | 23.59 | 21.85 | 21.76 | 21.65 |
| 5154 | 31.32 | 23.59 | 21.87 | 21.77 | 21.67 |
| 5156 | 31.34 | 23.61 | 21.88 | 21.78 | 21.67 |



|      |       |       |       |       |       |
|------|-------|-------|-------|-------|-------|
| 5158 | 31.33 | 23.62 | 21.89 | 21.79 | 21.68 |
| 5160 | 31.32 | 23.62 | 21.89 | 21.78 | 21.68 |
| 5162 | 31.32 | 23.63 | 21.9  | 21.79 | 21.68 |
| 5164 | 31.3  | 23.65 | 21.92 | 21.79 | 21.69 |
| 5166 | 31.27 | 23.61 | 21.88 | 21.76 | 21.67 |
| 5168 | 31.26 | 23.62 | 21.89 | 21.77 | 21.68 |
| 5170 | 31.25 | 23.61 | 21.89 | 21.77 | 21.68 |
| 5172 | 31.23 | 23.61 | 21.89 | 21.78 | 21.68 |
| 5174 | 31.22 | 23.61 | 21.88 | 21.77 | 21.67 |
| 5176 | 31.17 | 23.58 | 21.87 | 21.77 | 21.66 |
| 5178 | 31.14 | 23.57 | 21.85 | 21.75 | 21.65 |
| 5180 | 31.11 | 23.55 | 21.83 | 21.74 | 21.65 |
| 5182 | 31.12 | 23.57 | 21.86 | 21.75 | 21.66 |
| 5184 | 31.06 | 23.53 | 21.82 | 21.73 | 21.64 |
| 5186 | 31.06 | 23.55 | 21.83 | 21.75 | 21.65 |
| 5188 | 31    | 23.51 | 21.8  | 21.71 | 21.6  |
| 5190 | 31.02 | 23.54 | 21.84 | 21.75 | 21.63 |
| 5192 | 30.99 | 23.53 | 21.82 | 21.74 | 21.63 |
| 5194 | 30.97 | 23.54 | 21.83 | 21.75 | 21.63 |
| 5196 | 30.92 | 23.51 | 21.81 | 21.73 | 21.62 |
| 5198 | 30.88 | 23.49 | 21.77 | 21.7  | 21.59 |
| 5200 | 30.9  | 23.52 | 21.8  | 21.71 | 21.62 |
| 5202 | 30.86 | 23.48 | 21.76 | 21.68 | 21.59 |
| 5204 | 30.85 | 23.49 | 21.76 | 21.66 | 21.58 |
| 5206 | 30.86 | 23.51 | 21.78 | 21.7  | 21.61 |
| 5208 | 30.86 | 23.52 | 21.78 | 21.71 | 21.62 |
| 5210 | 30.84 | 23.51 | 21.76 | 21.69 | 21.6  |
| 5212 | 30.85 | 23.53 | 21.78 | 21.71 | 21.62 |
| 5214 | 30.85 | 23.51 | 21.76 | 21.69 | 21.61 |
| 5216 | 30.84 | 23.51 | 21.76 | 21.69 | 21.58 |
| 5218 | 30.81 | 23.49 | 21.73 | 21.68 | 21.58 |
| 5220 | 30.83 | 23.5  | 21.76 | 21.71 | 21.61 |
| 5222 | 30.82 | 23.5  | 21.76 | 21.71 | 21.6  |
| 5224 | 30.82 | 23.51 | 21.77 | 21.73 | 21.63 |
| 5226 | 30.82 | 23.51 | 21.77 | 21.73 | 21.62 |
| 5228 | 30.8  | 23.51 | 21.77 | 21.73 | 21.62 |
| 5230 | 30.79 | 23.52 | 21.78 | 21.73 | 21.62 |
| 5232 | 30.78 | 23.52 | 21.8  | 21.73 | 21.63 |
| 5234 | 30.77 | 23.52 | 21.79 | 21.71 | 21.61 |
| 5236 | 30.71 | 23.48 | 21.77 | 21.67 | 21.57 |
| 5238 | 30.7  | 23.47 | 21.77 | 21.67 | 21.56 |
| 5240 | 30.72 | 23.5  | 21.81 | 21.7  | 21.58 |
| 5242 | 30.72 | 23.53 | 21.84 | 21.71 | 21.6  |
| 5244 | 30.72 | 23.54 | 21.85 | 21.7  | 21.6  |

|      |       |       |       |       |       |
|------|-------|-------|-------|-------|-------|
| 5246 | 30.65 | 23.49 | 21.81 | 21.67 | 21.58 |
| 5248 | 30.65 | 23.52 | 21.83 | 21.68 | 21.59 |
| 5250 | 30.63 | 23.5  | 21.83 | 21.69 | 21.6  |
| 5252 | 30.64 | 23.52 | 21.84 | 21.71 | 21.62 |
| 5254 | 30.66 | 23.57 | 21.87 | 21.74 | 21.65 |
| 5256 | 30.64 | 23.56 | 21.85 | 21.73 | 21.64 |
| 5258 | 30.64 | 23.57 | 21.87 | 21.75 | 21.65 |
| 5260 | 30.63 | 23.57 | 21.87 | 21.75 | 21.65 |
| 5262 | 30.61 | 23.55 | 21.86 | 21.75 | 21.65 |
| 5264 | 30.6  | 23.55 | 21.84 | 21.73 | 21.64 |
| 5266 | 30.57 | 23.51 | 21.82 | 21.71 | 21.62 |
| 5268 | 30.55 | 23.52 | 21.8  | 21.71 | 21.61 |
| 5270 | 30.58 | 23.53 | 21.83 | 21.73 | 21.64 |
| 5272 | 30.57 | 23.52 | 21.82 | 21.72 | 21.63 |
| 5274 | 30.58 | 23.53 | 21.84 | 21.74 | 21.64 |
| 5276 | 30.54 | 23.48 | 21.82 | 21.71 | 21.62 |
| 5278 | 30.57 | 23.51 | 21.83 | 21.74 | 21.64 |
| 5280 | 30.57 | 23.51 | 21.84 | 21.74 | 21.63 |
| 5282 | 30.53 | 23.47 | 21.79 | 21.7  | 21.6  |
| 5284 | 30.52 | 23.47 | 21.78 | 21.7  | 21.59 |
| 5286 | 30.5  | 23.44 | 21.77 | 21.68 | 21.58 |
| 5288 | 30.5  | 23.43 | 21.76 | 21.68 | 21.56 |
| 5290 | 30.48 | 23.42 | 21.75 | 21.67 | 21.57 |
| 5292 | 30.46 | 23.4  | 21.74 | 21.67 | 21.56 |
| 5294 | 30.44 | 23.38 | 21.73 | 21.66 | 21.55 |
| 5296 | 30.46 | 23.42 | 21.76 | 21.71 | 21.6  |
| 5298 | 30.43 | 23.38 | 21.73 | 21.68 | 21.57 |
| 5300 | 30.41 | 23.37 | 21.72 | 21.67 | 21.58 |
| 5302 | 30.42 | 23.37 | 21.71 | 21.67 | 21.58 |
| 5304 | 30.42 | 23.4  | 21.75 | 21.72 | 21.62 |
| 5306 | 30.41 | 23.39 | 21.74 | 21.71 | 21.61 |
| 5308 | 30.4  | 23.37 | 21.74 | 21.71 | 21.61 |
| 5310 | 30.41 | 23.38 | 21.75 | 21.72 | 21.62 |
| 5312 | 30.38 | 23.36 | 21.73 | 21.72 | 21.61 |
| 5314 | 30.37 | 23.35 | 21.71 | 21.69 | 21.6  |
| 5316 | 30.36 | 23.34 | 21.71 | 21.67 | 21.59 |
| 5318 | 30.36 | 23.35 | 21.71 | 21.67 | 21.6  |
| 5320 | 30.34 | 23.32 | 21.69 | 21.67 | 21.57 |
| 5322 | 30.37 | 23.34 | 21.71 | 21.69 | 21.6  |
| 5324 | 30.35 | 23.32 | 21.7  | 21.68 | 21.59 |
| 5326 | 30.33 | 23.3  | 21.69 | 21.65 | 21.57 |
| 5328 | 30.31 | 23.28 | 21.67 | 21.67 | 21.58 |
| 5330 | 30.35 | 23.32 | 21.71 | 21.7  | 21.61 |
| 5332 | 30.34 | 23.3  | 21.69 | 21.69 | 21.6  |

|      |       |       |       |       |       |
|------|-------|-------|-------|-------|-------|
| 5334 | 30.35 | 23.31 | 21.71 | 21.71 | 21.6  |
| 5336 | 30.35 | 23.31 | 21.71 | 21.7  | 21.61 |
| 5338 | 30.35 | 23.31 | 21.72 | 21.72 | 21.62 |
| 5340 | 30.29 | 23.26 | 21.68 | 21.67 | 21.58 |
| 5342 | 30.31 | 23.28 | 21.7  | 21.69 | 21.59 |
| 5344 | 30.3  | 23.28 | 21.7  | 21.7  | 21.6  |
| 5346 | 30.3  | 23.27 | 21.7  | 21.69 | 21.6  |
| 5348 | 30.28 | 23.26 | 21.69 | 21.69 | 21.59 |
| 5350 | 30.24 | 23.23 | 21.68 | 21.67 | 21.59 |
| 5352 | 30.25 | 23.24 | 21.67 | 21.67 | 21.59 |
| 5354 | 30.23 | 23.23 | 21.66 | 21.64 | 21.57 |
| 5356 | 30.24 | 23.23 | 21.68 | 21.67 | 21.6  |
| 5358 | 30.21 | 23.22 | 21.67 | 21.67 | 21.59 |
| 5360 | 30.21 | 23.22 | 21.67 | 21.67 | 21.58 |
| 5362 | 30.18 | 23.2  | 21.66 | 21.66 | 21.58 |
| 5364 | 30.16 | 23.21 | 21.67 | 21.67 | 21.59 |
| 5366 | 30.14 | 23.2  | 21.66 | 21.65 | 21.58 |
| 5368 | 30.12 | 23.2  | 21.66 | 21.65 | 21.57 |
| 5370 | 30.1  | 23.21 | 21.65 | 21.65 | 21.57 |
| 5372 | 30.08 | 23.19 | 21.64 | 21.63 | 21.55 |
| 5374 | 30.08 | 23.21 | 21.65 | 21.64 | 21.56 |
| 5376 | 30.08 | 23.21 | 21.65 | 21.64 | 21.57 |
| 5378 | 30.03 | 23.18 | 21.62 | 21.61 | 21.53 |
| 5380 | 30.04 | 23.19 | 21.63 | 21.62 | 21.53 |
| 5382 | 30.04 | 23.21 | 21.65 | 21.63 | 21.56 |
| 5384 | 30.01 | 23.18 | 21.62 | 21.6  | 21.53 |
| 5386 | 30    | 23.18 | 21.62 | 21.6  | 21.54 |
| 5388 | 29.98 | 23.17 | 21.62 | 21.59 | 21.54 |
| 5390 | 29.97 | 23.18 | 21.65 | 21.6  | 21.53 |
| 5392 | 29.95 | 23.18 | 21.66 | 21.61 | 21.54 |
| 5394 | 29.95 | 23.19 | 21.67 | 21.62 | 21.55 |
| 5396 | 29.96 | 23.2  | 21.7  | 21.65 | 21.57 |
| 5398 | 29.94 | 23.19 | 21.7  | 21.64 | 21.58 |
| 5400 | 29.88 | 23.14 | 21.65 | 21.59 | 21.53 |
| 5402 | 29.89 | 23.17 | 21.7  | 21.63 | 21.56 |
| 5404 | 29.87 | 23.15 | 21.68 | 21.62 | 21.54 |
| 5406 | 29.84 | 23.14 | 21.68 | 21.61 | 21.53 |
| 5408 | 29.87 | 23.17 | 21.71 | 21.65 | 21.58 |
| 5410 | 29.85 | 23.16 | 21.71 | 21.65 | 21.58 |
| 5412 | 29.84 | 23.15 | 21.71 | 21.65 | 21.58 |
| 5414 | 29.82 | 23.15 | 21.7  | 21.65 | 21.58 |
| 5416 | 29.8  | 23.14 | 21.7  | 21.65 | 21.58 |
| 5418 | 29.79 | 23.13 | 21.7  | 21.65 | 21.58 |
| 5420 | 29.82 | 23.17 | 21.74 | 21.7  | 21.6  |

|      |       |       |       |       |       |
|------|-------|-------|-------|-------|-------|
| 5422 | 29.77 | 23.13 | 21.7  | 21.66 | 21.57 |
| 5424 | 29.76 | 23.13 | 21.69 | 21.65 | 21.57 |
| 5426 | 29.76 | 23.13 | 21.7  | 21.65 | 21.57 |
| 5428 | 29.77 | 23.14 | 21.73 | 21.68 | 21.6  |
| 5430 | 29.74 | 23.12 | 21.7  | 21.65 | 21.57 |
| 5432 | 29.72 | 23.1  | 21.68 | 21.63 | 21.54 |
| 5434 | 29.69 | 23.07 | 21.65 | 21.6  | 21.52 |
| 5436 | 29.7  | 23.09 | 21.67 | 21.62 | 21.55 |
| 5438 | 29.68 | 23.08 | 21.65 | 21.59 | 21.53 |
| 5440 | 29.69 | 23.1  | 21.67 | 21.62 | 21.55 |
| 5442 | 29.68 | 23.09 | 21.65 | 21.61 | 21.54 |
| 5444 | 29.67 | 23.09 | 21.66 | 21.62 | 21.54 |
| 5446 | 29.66 | 23.09 | 21.66 | 21.61 | 21.55 |
| 5448 | 29.66 | 23.08 | 21.66 | 21.61 | 21.55 |
| 5450 | 29.65 | 23.08 | 21.66 | 21.61 | 21.55 |
| 5452 | 29.63 | 23.07 | 21.66 | 21.61 | 21.55 |
| 5454 | 29.59 | 23.03 | 21.64 | 21.59 | 21.53 |
| 5456 | 29.6  | 23.05 | 21.65 | 21.6  | 21.52 |
| 5458 | 29.58 | 23.05 | 21.64 | 21.58 | 21.51 |
| 5460 | 29.55 | 23.03 | 21.63 | 21.58 | 21.51 |
| 5462 | 29.53 | 23.04 | 21.62 | 21.57 | 21.49 |
| 5464 | 29.51 | 23.03 | 21.62 | 21.57 | 21.49 |
| 5466 | 29.51 | 23.02 | 21.6  | 21.57 | 21.49 |
| 5468 | 29.52 | 23.04 | 21.6  | 21.57 | 21.49 |
| 5470 | 29.53 | 23.06 | 21.65 | 21.61 | 21.52 |
| 5472 | 29.52 | 23.07 | 21.65 | 21.62 | 21.52 |
| 5474 | 29.49 | 23.03 | 21.62 | 21.59 | 21.51 |
| 5476 | 29.46 | 23.01 | 21.61 | 21.56 | 21.48 |
| 5478 | 29.45 | 23.03 | 21.62 | 21.58 | 21.5  |
| 5480 | 29.43 | 23.03 | 21.62 | 21.57 | 21.49 |
| 5482 | 29.46 | 23.07 | 21.67 | 21.62 | 21.53 |
| 5484 | 29.41 | 23.05 | 21.65 | 21.6  | 21.52 |
| 5486 | 29.41 | 23.07 | 21.64 | 21.59 | 21.52 |
| 5488 | 29.42 | 23.1  | 21.69 | 21.63 | 21.56 |
| 5490 | 29.4  | 23.09 | 21.68 | 21.62 | 21.54 |
| 5492 | 29.4  | 23.09 | 21.68 | 21.64 | 21.56 |
| 5494 | 29.39 | 23.09 | 21.68 | 21.65 | 21.56 |
| 5496 | 29.37 | 23.08 | 21.68 | 21.65 | 21.57 |
| 5498 | 29.34 | 23.06 | 21.66 | 21.64 | 21.55 |
| 5500 | 29.31 | 23.03 | 21.64 | 21.62 | 21.53 |
| 5502 | 29.28 | 22.99 | 21.61 | 21.59 | 21.51 |
| 5504 | 29.27 | 22.99 | 21.61 | 21.59 | 21.5  |
| 5506 | 29.27 | 22.99 | 21.6  | 21.59 | 21.5  |
| 5508 | 29.25 | 22.98 | 21.6  | 21.59 | 21.5  |

|      |       |       |       |       |       |
|------|-------|-------|-------|-------|-------|
| 5510 | 29.25 | 23    | 21.63 | 21.61 | 21.53 |
| 5512 | 29.24 | 23.01 | 21.63 | 21.61 | 21.52 |
| 5514 | 29.25 | 23.03 | 21.66 | 21.63 | 21.55 |
| 5516 | 29.24 | 23.03 | 21.67 | 21.62 | 21.53 |
| 5518 | 29.19 | 23    | 21.63 | 21.59 | 21.5  |
| 5520 | 29.17 | 22.97 | 21.61 | 21.57 | 21.49 |
| 5522 | 29.15 | 22.96 | 21.6  | 21.56 | 21.48 |
| 5524 | 29.16 | 22.97 | 21.62 | 21.57 | 21.5  |
| 5526 | 29.16 | 22.97 | 21.62 | 21.57 | 21.5  |
| 5528 | 29.18 | 23    | 21.66 | 21.62 | 21.54 |
| 5530 | 29.14 | 22.98 | 21.64 | 21.6  | 21.53 |
| 5532 | 29.09 | 22.93 | 21.61 | 21.56 | 21.49 |
| 5534 | 29.09 | 22.93 | 21.62 | 21.57 | 21.49 |
| 5536 | 29.11 | 22.97 | 21.65 | 21.6  | 21.52 |
| 5538 | 29.08 | 22.94 | 21.62 | 21.57 | 21.5  |
| 5540 | 29.05 | 22.92 | 21.61 | 21.57 | 21.49 |
| 5542 | 29.04 | 22.92 | 21.62 | 21.56 | 21.49 |
| 5544 | 29.02 | 22.91 | 21.62 | 21.56 | 21.48 |
| 5546 | 29    | 22.89 | 21.61 | 21.56 | 21.48 |
| 5548 | 29    | 22.89 | 21.61 | 21.56 | 21.48 |
| 5550 | 29    | 22.91 | 21.63 | 21.58 | 21.51 |
| 5552 | 28.96 | 22.88 | 21.6  | 21.56 | 21.47 |
| 5554 | 28.98 | 22.91 | 21.64 | 21.59 | 21.51 |
| 5556 | 28.99 | 22.91 | 21.64 | 21.6  | 21.52 |
| 5558 | 28.98 | 22.91 | 21.63 | 21.58 | 21.49 |
| 5560 | 28.97 | 22.91 | 21.63 | 21.58 | 21.49 |
| 5562 | 28.96 | 22.9  | 21.62 | 21.57 | 21.49 |
| 5564 | 28.93 | 22.86 | 21.59 | 21.55 | 21.46 |
| 5566 | 28.97 | 22.91 | 21.62 | 21.57 | 21.5  |
| 5568 | 28.92 | 22.87 | 21.58 | 21.55 | 21.46 |
| 5570 | 28.93 | 22.87 | 21.58 | 21.55 | 21.47 |
| 5572 | 28.94 | 22.89 | 21.61 | 21.57 | 21.5  |
| 5574 | 28.94 | 22.9  | 21.62 | 21.59 | 21.51 |
| 5576 | 28.94 | 22.91 | 21.63 | 21.59 | 21.52 |
| 5578 | 28.93 | 22.91 | 21.62 | 21.59 | 21.52 |
| 5580 | 28.93 | 22.92 | 21.64 | 21.6  | 21.53 |
| 5582 | 28.91 | 22.9  | 21.61 | 21.58 | 21.52 |
| 5584 | 28.89 | 22.89 | 21.6  | 21.55 | 21.5  |
| 5586 | 28.86 | 22.87 | 21.58 | 21.54 | 21.48 |
| 5588 | 28.87 | 22.87 | 21.59 | 21.56 | 21.5  |
| 5590 | 28.84 | 22.85 | 21.59 | 21.55 | 21.49 |
| 5592 | 28.87 | 22.88 | 21.6  | 21.57 | 21.5  |
| 5594 | 28.84 | 22.86 | 21.59 | 21.56 | 21.5  |
| 5596 | 28.82 | 22.84 | 21.57 | 21.54 | 21.47 |

|      |       |       |       |       |       |
|------|-------|-------|-------|-------|-------|
| 5598 | 28.82 | 22.84 | 21.58 | 21.55 | 21.5  |
| 5600 | 28.78 | 22.82 | 21.57 | 21.53 | 21.47 |
| 5602 | 28.79 | 22.83 | 21.58 | 21.54 | 21.47 |
| 5604 | 28.8  | 22.84 | 21.59 | 21.56 | 21.49 |
| 5606 | 28.77 | 22.81 | 21.59 | 21.56 | 21.49 |
| 5608 | 28.76 | 22.83 | 21.6  | 21.57 | 21.51 |
| 5610 | 28.74 | 22.81 | 21.57 | 21.56 | 21.49 |
| 5612 | 28.75 | 22.83 | 21.6  | 21.58 | 21.52 |
| 5614 | 28.74 | 22.82 | 21.6  | 21.58 | 21.51 |
| 5616 | 28.68 | 22.77 | 21.55 | 21.54 | 21.48 |
| 5618 | 28.71 | 22.81 | 21.58 | 21.57 | 21.51 |
| 5620 | 28.7  | 22.81 | 21.59 | 21.58 | 21.51 |
| 5622 | 28.68 | 22.81 | 21.59 | 21.59 | 21.51 |
| 5624 | 28.67 | 22.81 | 21.59 | 21.59 | 21.51 |
| 5626 | 28.67 | 22.81 | 21.58 | 21.58 | 21.5  |
| 5628 | 28.66 | 22.8  | 21.57 | 21.58 | 21.5  |
| 5630 | 28.64 | 22.8  | 21.57 | 21.58 | 21.5  |
| 5632 | 28.63 | 22.79 | 21.55 | 21.56 | 21.48 |
| 5634 | 28.62 | 22.78 | 21.56 | 21.57 | 21.49 |
| 5636 | 28.61 | 22.78 | 21.56 | 21.56 | 21.49 |
| 5638 | 28.6  | 22.77 | 21.54 | 21.55 | 21.47 |
| 5640 | 28.61 | 22.78 | 21.55 | 21.56 | 21.48 |
| 5642 | 28.57 | 22.74 | 21.52 | 21.53 | 21.46 |
| 5644 | 28.58 | 22.76 | 21.54 | 21.55 | 21.47 |
| 5646 | 28.58 | 22.77 | 21.55 | 21.56 | 21.47 |
| 5648 | 28.58 | 22.76 | 21.55 | 21.56 | 21.47 |
| 5650 | 28.57 | 22.76 | 21.54 | 21.55 | 21.47 |
| 5652 | 28.57 | 22.77 | 21.55 | 21.57 | 21.5  |
| 5654 | 28.53 | 22.73 | 21.53 | 21.53 | 21.46 |
| 5656 | 28.54 | 22.75 | 21.53 | 21.54 | 21.47 |
| 5658 | 28.52 | 22.74 | 21.52 | 21.53 | 21.47 |
| 5660 | 28.52 | 22.73 | 21.52 | 21.53 | 21.47 |
| 5662 | 28.52 | 22.73 | 21.52 | 21.53 | 21.47 |
| 5664 | 28.51 | 22.73 | 21.52 | 21.54 | 21.47 |
| 5666 | 28.49 | 22.71 | 21.5  | 21.51 | 21.47 |
| 5668 | 28.49 | 22.72 | 21.51 | 21.53 | 21.47 |
| 5670 | 28.49 | 22.72 | 21.52 | 21.53 | 21.47 |
| 5672 | 28.5  | 22.72 | 21.51 | 21.53 | 21.47 |
| 5674 | 28.49 | 22.71 | 21.51 | 21.53 | 21.47 |
| 5676 | 28.49 | 22.71 | 21.5  | 21.52 | 21.47 |
| 5678 | 28.47 | 22.69 | 21.49 | 21.5  | 21.45 |
| 5680 | 28.48 | 22.71 | 21.5  | 21.52 | 21.46 |
| 5682 | 28.46 | 22.69 | 21.5  | 21.52 | 21.45 |
| 5684 | 28.46 | 22.69 | 21.51 | 21.53 | 21.46 |

|      |       |       |       |       |       |
|------|-------|-------|-------|-------|-------|
| 5686 | 28.44 | 22.67 | 21.48 | 21.5  | 21.43 |
| 5688 | 28.42 | 22.65 | 21.47 | 21.5  | 21.43 |
| 5690 | 28.39 | 22.63 | 21.45 | 21.48 | 21.41 |
| 5692 | 28.43 | 22.67 | 21.49 | 21.52 | 21.45 |
| 5694 | 28.4  | 22.66 | 21.48 | 21.49 | 21.43 |
| 5696 | 28.42 | 22.69 | 21.51 | 21.52 | 21.46 |
| 5698 | 28.41 | 22.68 | 21.52 | 21.51 | 21.45 |
| 5700 | 28.4  | 22.71 | 21.54 | 21.52 | 21.47 |
| 5702 | 28.37 | 22.69 | 21.52 | 21.5  | 21.45 |
| 5704 | 28.33 | 22.66 | 21.5  | 21.47 | 21.41 |
| 5706 | 28.37 | 22.71 | 21.55 | 21.51 | 21.45 |
| 5708 | 28.34 | 22.69 | 21.54 | 21.49 | 21.44 |
| 5710 | 28.35 | 22.72 | 21.56 | 21.53 | 21.46 |
| 5712 | 28.35 | 22.74 | 21.58 | 21.55 | 21.47 |
| 5714 | 28.32 | 22.71 | 21.55 | 21.52 | 21.44 |
| 5716 | 28.34 | 22.74 | 21.58 | 21.56 | 21.48 |
| 5718 | 28.34 | 22.74 | 21.57 | 21.55 | 21.48 |
| 5720 | 28.27 | 22.69 | 21.53 | 21.5  | 21.44 |
| 5722 | 28.31 | 22.73 | 21.57 | 21.55 | 21.47 |

60kg440C°

|    |       |       |       |       |       |
|----|-------|-------|-------|-------|-------|
| 0  | 21.83 | 22.08 | 22.14 | 22.3  | 22.22 |
| 2  | 21.85 | 22.11 | 22.16 | 22.32 | 22.25 |
| 4  | 21.85 | 22.12 | 22.19 | 22.34 | 22.26 |
| 6  | 21.84 | 22.12 | 22.19 | 22.35 | 22.26 |
| 8  | 21.83 | 22.12 | 22.19 | 22.35 | 22.25 |
| 10 | 21.85 | 22.16 | 22.22 | 22.38 | 22.26 |
| 12 | 21.87 | 22.17 | 22.23 | 22.4  | 22.26 |
| 14 | 21.89 | 22.22 | 22.27 | 22.44 | 22.3  |
| 16 | 21.88 | 22.21 | 22.28 | 22.44 | 22.28 |
| 18 | 21.91 | 22.24 | 22.3  | 22.48 | 22.3  |
| 20 | 21.92 | 22.26 | 22.34 | 22.51 | 22.32 |
| 22 | 21.9  | 22.26 | 22.34 | 22.51 | 22.3  |
| 24 | 21.94 | 22.29 | 22.35 | 22.54 | 22.32 |
| 26 | 21.93 | 22.3  | 22.37 | 22.55 | 22.34 |
| 28 | 21.95 | 22.33 | 22.41 | 22.59 | 22.38 |
| 30 | 21.96 | 22.35 | 22.43 | 22.61 | 22.37 |
| 32 | 21.96 | 22.36 | 22.43 | 22.62 | 22.37 |
| 34 | 21.97 | 22.37 | 22.45 | 22.63 | 22.37 |
| 36 | 21.98 | 22.38 | 22.46 | 22.65 | 22.37 |
| 38 | 21.99 | 22.39 | 22.46 | 22.65 | 22.38 |
| 40 | 22    | 22.4  | 22.47 | 22.66 | 22.38 |
| 42 | 22.01 | 22.41 | 22.49 | 22.68 | 22.39 |
| 44 | 22.02 | 22.42 | 22.5  | 22.69 | 22.39 |
| 46 | 22.03 | 22.41 | 22.49 | 22.69 | 22.37 |

|     |       |       |       |       |       |
|-----|-------|-------|-------|-------|-------|
| 48  | 22.05 | 22.44 | 22.52 | 22.7  | 22.39 |
| 50  | 22.07 | 22.46 | 22.54 | 22.72 | 22.4  |
| 52  | 22.11 | 22.49 | 22.57 | 22.75 | 22.44 |
| 54  | 22.14 | 22.52 | 22.6  | 22.8  | 22.47 |
| 56  | 22.11 | 22.47 | 22.57 | 22.75 | 22.41 |
| 58  | 22.17 | 22.54 | 22.63 | 22.81 | 22.46 |
| 60  | 22.15 | 22.52 | 22.6  | 22.79 | 22.45 |
| 62  | 22.17 | 22.52 | 22.61 | 22.8  | 22.45 |
| 64  | 22.21 | 22.55 | 22.65 | 22.84 | 22.48 |
| 66  | 22.24 | 22.56 | 22.65 | 22.83 | 22.47 |
| 68  | 22.24 | 22.56 | 22.65 | 22.83 | 22.45 |
| 70  | 22.29 | 22.59 | 22.68 | 22.87 | 22.48 |
| 72  | 22.33 | 22.61 | 22.69 | 22.87 | 22.47 |
| 74  | 22.31 | 22.59 | 22.67 | 22.86 | 22.45 |
| 76  | 22.38 | 22.62 | 22.71 | 22.89 | 22.48 |
| 78  | 22.42 | 22.63 | 22.7  | 22.89 | 22.48 |
| 80  | 22.44 | 22.63 | 22.72 | 22.9  | 22.48 |
| 82  | 22.48 | 22.64 | 22.74 | 22.92 | 22.5  |
| 84  | 22.51 | 22.65 | 22.74 | 22.92 | 22.5  |
| 86  | 22.55 | 22.65 | 22.75 | 22.93 | 22.5  |
| 88  | 22.57 | 22.65 | 22.73 | 22.91 | 22.49 |
| 90  | 22.59 | 22.63 | 22.73 | 22.89 | 22.47 |
| 92  | 22.69 | 22.69 | 22.79 | 22.95 | 22.52 |
| 94  | 22.71 | 22.68 | 22.78 | 22.97 | 22.51 |
| 96  | 22.76 | 22.68 | 22.78 | 22.97 | 22.52 |
| 98  | 22.8  | 22.69 | 22.79 | 22.97 | 22.52 |
| 100 | 22.84 | 22.69 | 22.79 | 22.98 | 22.52 |
| 102 | 22.89 | 22.7  | 22.8  | 22.98 | 22.52 |
| 104 | 22.93 | 22.7  | 22.79 | 22.98 | 22.5  |
| 106 | 23.01 | 22.72 | 22.82 | 23.01 | 22.52 |
| 108 | 23.09 | 22.76 | 22.86 | 23.06 | 22.56 |
| 110 | 23.14 | 22.77 | 22.87 | 23.05 | 22.57 |
| 112 | 23.19 | 22.79 | 22.88 | 23.07 | 22.57 |
| 114 | 23.26 | 22.8  | 22.89 | 23.07 | 22.56 |
| 116 | 23.3  | 22.78 | 22.87 | 23.05 | 22.54 |
| 118 | 23.35 | 22.77 | 22.87 | 23.05 | 22.54 |
| 120 | 23.41 | 22.76 | 22.86 | 23.04 | 22.53 |
| 122 | 23.49 | 22.76 | 22.87 | 23.05 | 22.54 |
| 124 | 23.55 | 22.77 | 22.87 | 23.04 | 22.54 |
| 126 | 23.64 | 22.79 | 22.88 | 23.05 | 22.54 |
| 128 | 23.68 | 22.77 | 22.87 | 23.04 | 22.52 |
| 130 | 23.82 | 22.84 | 22.93 | 23.11 | 22.58 |
| 132 | 23.91 | 22.85 | 22.95 | 23.13 | 22.6  |
| 134 | 24.02 | 22.88 | 22.98 | 23.16 | 22.61 |



|     |       |       |       |       |       |
|-----|-------|-------|-------|-------|-------|
| 136 | 24.09 | 22.86 | 22.97 | 23.14 | 22.61 |
| 138 | 24.17 | 22.86 | 22.97 | 23.14 | 22.61 |
| 140 | 24.24 | 22.87 | 22.96 | 23.14 | 22.6  |
| 142 | 24.34 | 22.9  | 23    | 23.15 | 22.61 |
| 144 | 24.42 | 22.9  | 22.98 | 23.15 | 22.61 |
| 146 | 24.51 | 22.89 | 22.98 | 23.15 | 22.6  |
| 148 | 24.62 | 22.9  | 22.98 | 23.16 | 22.6  |
| 150 | 24.76 | 22.94 | 23.05 | 23.21 | 22.65 |
| 152 | 24.85 | 22.94 | 23.02 | 23.2  | 22.65 |
| 154 | 24.99 | 22.96 | 23.05 | 23.21 | 22.64 |
| 156 | 25.08 | 22.97 | 23.07 | 23.23 | 22.66 |
| 158 | 25.17 | 22.97 | 23.05 | 23.21 | 22.65 |
| 160 | 25.29 | 22.99 | 23.07 | 23.24 | 22.67 |
| 162 | 25.4  | 22.99 | 23.08 | 23.24 | 22.66 |
| 164 | 25.52 | 23.01 | 23.09 | 23.25 | 22.67 |
| 166 | 25.64 | 23.01 | 23.09 | 23.26 | 22.68 |
| 168 | 25.73 | 23.02 | 23.08 | 23.24 | 22.67 |
| 170 | 25.89 | 23.02 | 23.09 | 23.25 | 22.68 |
| 172 | 26.02 | 23.04 | 23.12 | 23.28 | 22.7  |
| 174 | 26.14 | 23.03 | 23.1  | 23.26 | 22.67 |
| 176 | 26.27 | 23.04 | 23.1  | 23.26 | 22.67 |
| 178 | 26.39 | 23.03 | 23.09 | 23.25 | 22.67 |
| 180 | 26.53 | 23.07 | 23.12 | 23.29 | 22.71 |
| 182 | 26.67 | 23.08 | 23.14 | 23.3  | 22.71 |
| 184 | 26.8  | 23.07 | 23.12 | 23.28 | 22.69 |
| 186 | 26.97 | 23.1  | 23.14 | 23.32 | 22.7  |
| 188 | 27.1  | 23.1  | 23.14 | 23.3  | 22.69 |
| 190 | 27.19 | 23.08 | 23.11 | 23.28 | 22.65 |
| 192 | 27.36 | 23.11 | 23.12 | 23.3  | 22.67 |
| 194 | 27.53 | 23.13 | 23.14 | 23.32 | 22.7  |
| 196 | 27.68 | 23.14 | 23.16 | 23.32 | 22.69 |
| 198 | 27.84 | 23.17 | 23.17 | 23.33 | 22.71 |
| 200 | 27.97 | 23.15 | 23.16 | 23.31 | 22.69 |
| 202 | 28.11 | 23.13 | 23.14 | 23.28 | 22.66 |
| 204 | 28.29 | 23.17 | 23.17 | 23.33 | 22.7  |
| 206 | 28.44 | 23.17 | 23.16 | 23.32 | 22.69 |
| 208 | 28.59 | 23.18 | 23.16 | 23.32 | 22.69 |
| 210 | 28.78 | 23.18 | 23.16 | 23.31 | 22.69 |
| 212 | 28.98 | 23.23 | 23.21 | 23.36 | 22.74 |
| 214 | 29.13 | 23.23 | 23.19 | 23.35 | 22.7  |
| 216 | 29.31 | 23.27 | 23.22 | 23.38 | 22.73 |
| 218 | 29.53 | 23.3  | 23.25 | 23.39 | 22.74 |
| 220 | 29.68 | 23.28 | 23.21 | 23.35 | 22.71 |
| 222 | 29.86 | 23.31 | 23.24 | 23.39 | 22.73 |

|     |       |       |       |       |       |
|-----|-------|-------|-------|-------|-------|
| 224 | 30.02 | 23.31 | 23.22 | 23.37 | 22.72 |
| 226 | 30.25 | 23.35 | 23.26 | 23.41 | 22.75 |
| 228 | 30.42 | 23.37 | 23.25 | 23.4  | 22.75 |
| 230 | 30.58 | 23.35 | 23.24 | 23.39 | 22.75 |
| 232 | 30.81 | 23.38 | 23.26 | 23.4  | 22.75 |
| 234 | 30.99 | 23.38 | 23.26 | 23.4  | 22.76 |
| 236 | 31.17 | 23.41 | 23.25 | 23.4  | 22.76 |
| 238 | 31.34 | 23.41 | 23.24 | 23.39 | 22.74 |
| 240 | 31.58 | 23.44 | 23.27 | 23.41 | 22.76 |
| 242 | 31.78 | 23.46 | 23.28 | 23.41 | 22.76 |
| 244 | 31.98 | 23.48 | 23.29 | 23.42 | 22.76 |
| 246 | 32.17 | 23.51 | 23.29 | 23.43 | 22.76 |
| 248 | 32.36 | 23.53 | 23.29 | 23.43 | 22.77 |
| 250 | 32.6  | 23.54 | 23.29 | 23.43 | 22.76 |
| 252 | 32.79 | 23.56 | 23.29 | 23.43 | 22.76 |
| 254 | 33.02 | 23.61 | 23.32 | 23.46 | 22.77 |
| 256 | 33.24 | 23.61 | 23.31 | 23.44 | 22.77 |
| 258 | 33.46 | 23.63 | 23.31 | 23.44 | 22.77 |
| 260 | 33.67 | 23.64 | 23.31 | 23.43 | 22.78 |
| 262 | 33.9  | 23.67 | 23.33 | 23.44 | 22.79 |
| 264 | 34.14 | 23.68 | 23.32 | 23.43 | 22.77 |
| 266 | 34.38 | 23.72 | 23.34 | 23.44 | 22.78 |
| 268 | 34.58 | 23.75 | 23.34 | 23.45 | 22.78 |
| 270 | 34.8  | 23.77 | 23.34 | 23.45 | 22.79 |
| 272 | 35.03 | 23.78 | 23.32 | 23.44 | 22.77 |
| 274 | 35.26 | 23.82 | 23.34 | 23.46 | 22.79 |
| 276 | 35.5  | 23.85 | 23.35 | 23.47 | 22.78 |
| 278 | 35.73 | 23.89 | 23.36 | 23.48 | 22.79 |
| 280 | 35.94 | 23.9  | 23.35 | 23.47 | 22.78 |
| 282 | 36.19 | 23.93 | 23.35 | 23.47 | 22.77 |
| 284 | 36.42 | 23.96 | 23.35 | 23.46 | 22.78 |
| 286 | 36.66 | 23.99 | 23.37 | 23.49 | 22.81 |
| 288 | 36.9  | 24.04 | 23.38 | 23.49 | 22.8  |
| 290 | 37.15 | 24.07 | 23.39 | 23.49 | 22.8  |
| 292 | 37.43 | 24.13 | 23.41 | 23.52 | 22.82 |
| 294 | 37.69 | 24.18 | 23.44 | 23.53 | 22.84 |
| 296 | 37.94 | 24.22 | 23.45 | 23.55 | 22.87 |
| 298 | 38.23 | 24.27 | 23.48 | 23.57 | 22.88 |
| 300 | 38.44 | 24.28 | 23.45 | 23.54 | 22.85 |
| 302 | 38.71 | 24.35 | 23.47 | 23.55 | 22.86 |
| 304 | 38.93 | 24.36 | 23.47 | 23.54 | 22.87 |
| 306 | 39.24 | 24.42 | 23.5  | 23.56 | 22.88 |
| 308 | 39.45 | 24.42 | 23.47 | 23.54 | 22.86 |
| 310 | 39.68 | 24.46 | 23.47 | 23.55 | 22.85 |

|     |       |       |       |       |       |
|-----|-------|-------|-------|-------|-------|
| 312 | 39.92 | 24.49 | 23.47 | 23.54 | 22.85 |
| 314 | 40.21 | 24.54 | 23.48 | 23.54 | 22.86 |
| 316 | 40.45 | 24.57 | 23.47 | 23.53 | 22.86 |
| 318 | 40.7  | 24.62 | 23.48 | 23.54 | 22.85 |
| 320 | 40.96 | 24.66 | 23.5  | 23.55 | 22.86 |
| 322 | 41.25 | 24.71 | 23.5  | 23.56 | 22.86 |
| 324 | 41.52 | 24.79 | 23.53 | 23.59 | 22.89 |
| 326 | 41.81 | 24.87 | 23.58 | 23.63 | 22.92 |
| 328 | 42.07 | 24.91 | 23.58 | 23.63 | 22.92 |
| 330 | 42.34 | 24.92 | 23.57 | 23.6  | 22.9  |
| 332 | 42.58 | 24.95 | 23.55 | 23.58 | 22.87 |
| 334 | 42.86 | 25.02 | 23.58 | 23.59 | 22.89 |
| 336 | 43.11 | 25.05 | 23.57 | 23.59 | 22.87 |
| 338 | 43.4  | 25.1  | 23.55 | 23.57 | 22.86 |
| 340 | 43.68 | 25.15 | 23.59 | 23.6  | 22.89 |
| 342 | 43.95 | 25.22 | 23.62 | 23.62 | 22.93 |
| 344 | 44.25 | 25.27 | 23.62 | 23.63 | 22.93 |
| 346 | 44.49 | 25.32 | 23.6  | 23.6  | 22.91 |
| 348 | 44.74 | 25.33 | 23.59 | 23.59 | 22.89 |
| 350 | 45.01 | 25.41 | 23.64 | 23.63 | 22.92 |
| 352 | 45.33 | 25.47 | 23.64 | 23.64 | 22.93 |
| 354 | 45.57 | 25.51 | 23.64 | 23.63 | 22.92 |
| 356 | 45.85 | 25.58 | 23.67 | 23.64 | 22.92 |
| 358 | 46.11 | 25.64 | 23.68 | 23.66 | 22.93 |
| 360 | 46.38 | 25.7  | 23.69 | 23.66 | 22.93 |
| 362 | 46.66 | 25.74 | 23.68 | 23.64 | 22.91 |
| 364 | 46.92 | 25.81 | 23.69 | 23.65 | 22.93 |
| 366 | 47.18 | 25.87 | 23.72 | 23.66 | 22.93 |
| 368 | 47.42 | 25.94 | 23.72 | 23.66 | 22.93 |
| 370 | 47.73 | 26.02 | 23.73 | 23.68 | 22.94 |
| 372 | 47.99 | 26.08 | 23.76 | 23.69 | 22.94 |
| 374 | 48.24 | 26.13 | 23.75 | 23.67 | 22.94 |
| 376 | 48.51 | 26.17 | 23.73 | 23.63 | 22.91 |
| 378 | 48.76 | 26.24 | 23.75 | 23.64 | 22.91 |
| 380 | 49.04 | 26.31 | 23.77 | 23.66 | 22.94 |
| 382 | 49.28 | 26.35 | 23.76 | 23.64 | 22.91 |
| 384 | 49.58 | 26.41 | 23.75 | 23.63 | 22.9  |
| 386 | 49.87 | 26.52 | 23.81 | 23.66 | 22.93 |
| 388 | 50.12 | 26.59 | 23.81 | 23.66 | 22.93 |
| 390 | 50.37 | 26.63 | 23.8  | 23.65 | 22.94 |
| 392 | 50.65 | 26.72 | 23.83 | 23.67 | 22.95 |
| 394 | 50.96 | 26.81 | 23.85 | 23.68 | 22.94 |
| 396 | 51.22 | 26.89 | 23.86 | 23.68 | 22.93 |
| 398 | 51.49 | 26.98 | 23.88 | 23.69 | 22.94 |

|     |       |       |       |       |       |
|-----|-------|-------|-------|-------|-------|
| 400 | 51.72 | 27.02 | 23.87 | 23.68 | 22.94 |
| 402 | 52.05 | 27.11 | 23.9  | 23.69 | 22.95 |
| 404 | 52.31 | 27.2  | 23.92 | 23.7  | 22.94 |
| 406 | 52.57 | 27.29 | 23.93 | 23.7  | 22.95 |
| 408 | 52.83 | 27.36 | 23.95 | 23.7  | 22.95 |
| 410 | 53.12 | 27.43 | 23.94 | 23.69 | 22.94 |
| 412 | 53.44 | 27.55 | 24    | 23.72 | 22.98 |
| 414 | 53.7  | 27.62 | 24.02 | 23.73 | 22.99 |
| 416 | 53.99 | 27.69 | 24.01 | 23.72 | 22.97 |
| 418 | 54.22 | 27.74 | 23.99 | 23.7  | 22.94 |
| 420 | 54.49 | 27.85 | 24.02 | 23.71 | 22.95 |
| 422 | 54.77 | 27.94 | 24.06 | 23.74 | 22.98 |
| 424 | 55.06 | 28.06 | 24.1  | 23.77 | 23.01 |
| 426 | 55.35 | 28.13 | 24.08 | 23.74 | 22.97 |
| 428 | 55.62 | 28.2  | 24.1  | 23.74 | 22.96 |
| 430 | 55.88 | 28.29 | 24.12 | 23.74 | 22.97 |
| 432 | 56.18 | 28.41 | 24.16 | 23.79 | 23    |
| 434 | 56.45 | 28.5  | 24.16 | 23.77 | 22.99 |
| 436 | 56.72 | 28.56 | 24.17 | 23.75 | 22.97 |
| 438 | 57    | 28.65 | 24.18 | 23.76 | 22.97 |
| 440 | 57.31 | 28.73 | 24.21 | 23.76 | 22.97 |
| 442 | 57.63 | 28.9  | 24.28 | 23.81 | 23.03 |
| 444 | 57.88 | 28.97 | 24.28 | 23.81 | 23.02 |
| 446 | 58.1  | 29.03 | 24.27 | 23.76 | 22.98 |
| 448 | 58.45 | 29.16 | 24.32 | 23.81 | 23.03 |
| 450 | 58.72 | 29.27 | 24.33 | 23.8  | 23.02 |
| 452 | 59    | 29.36 | 24.37 | 23.82 | 23.03 |
| 454 | 59.26 | 29.44 | 24.38 | 23.81 | 23.02 |
| 456 | 59.6  | 29.55 | 24.41 | 23.82 | 23.04 |
| 458 | 59.85 | 29.65 | 24.42 | 23.82 | 23.03 |
| 460 | 60.08 | 29.72 | 24.41 | 23.8  | 23    |
| 462 | 60.35 | 29.82 | 24.43 | 23.8  | 23    |
| 464 | 60.66 | 29.96 | 24.49 | 23.84 | 23.05 |
| 466 | 60.97 | 30.06 | 24.53 | 23.85 | 23.06 |
| 468 | 61.25 | 30.18 | 24.54 | 23.86 | 23.06 |
| 470 | 61.52 | 30.26 | 24.55 | 23.85 | 23.04 |
| 472 | 61.81 | 30.36 | 24.6  | 23.88 | 23.07 |
| 474 | 62.13 | 30.47 | 24.62 | 23.89 | 23.07 |
| 476 | 62.39 | 30.58 | 24.64 | 23.89 | 23.07 |
| 478 | 62.66 | 30.68 | 24.67 | 23.91 | 23.08 |
| 480 | 62.93 | 30.76 | 24.69 | 23.9  | 23.06 |
| 482 | 63.26 | 30.89 | 24.72 | 23.92 | 23.09 |
| 484 | 63.52 | 30.97 | 24.74 | 23.91 | 23.08 |
| 486 | 63.8  | 31.07 | 24.76 | 23.91 | 23.08 |

|     |       |       |       |       |       |
|-----|-------|-------|-------|-------|-------|
| 488 | 64.09 | 31.19 | 24.79 | 23.93 | 23.08 |
| 490 | 64.4  | 31.3  | 24.82 | 23.94 | 23.11 |
| 492 | 64.68 | 31.4  | 24.85 | 23.93 | 23.1  |
| 494 | 64.96 | 31.5  | 24.89 | 23.96 | 23.1  |
| 496 | 65.25 | 31.58 | 24.9  | 23.95 | 23.09 |
| 498 | 65.52 | 31.69 | 24.93 | 23.94 | 23.08 |
| 500 | 65.86 | 31.84 | 25    | 24    | 23.14 |
| 502 | 66.15 | 31.95 | 25.02 | 24.01 | 23.14 |
| 504 | 66.38 | 32    | 25.01 | 23.98 | 23.1  |
| 506 | 66.65 | 32.1  | 25.04 | 24    | 23.12 |
| 508 | 66.97 | 32.22 | 25.09 | 24.01 | 23.13 |
| 510 | 67.23 | 32.28 | 25.07 | 23.98 | 23.1  |
| 512 | 67.5  | 32.4  | 25.11 | 23.99 | 23.1  |
| 514 | 67.85 | 32.52 | 25.15 | 24.02 | 23.12 |
| 516 | 68.15 | 32.65 | 25.21 | 24.05 | 23.16 |
| 518 | 68.43 | 32.75 | 25.24 | 24.06 | 23.16 |
| 520 | 68.71 | 32.84 | 25.26 | 24.06 | 23.17 |
| 522 | 69    | 32.91 | 25.26 | 24.03 | 23.14 |
| 524 | 69.26 | 33    | 25.27 | 24.01 | 23.12 |
| 526 | 69.56 | 33.12 | 25.31 | 24.03 | 23.15 |
| 528 | 69.87 | 33.24 | 25.37 | 24.08 | 23.18 |
| 530 | 70.21 | 33.38 | 25.4  | 24.09 | 23.19 |
| 532 | 70.49 | 33.47 | 25.43 | 24.09 | 23.19 |
| 534 | 70.77 | 33.57 | 25.47 | 24.12 | 23.21 |
| 536 | 71.08 | 33.7  | 25.53 | 24.15 | 23.23 |
| 538 | 71.36 | 33.77 | 25.52 | 24.11 | 23.18 |
| 540 | 71.64 | 33.86 | 25.56 | 24.13 | 23.2  |
| 542 | 71.92 | 33.97 | 25.58 | 24.13 | 23.2  |
| 544 | 72.26 | 34.07 | 25.62 | 24.14 | 23.21 |
| 546 | 72.53 | 34.17 | 25.63 | 24.13 | 23.19 |
| 548 | 72.81 | 34.27 | 25.66 | 24.14 | 23.19 |
| 550 | 73.08 | 34.35 | 25.68 | 24.15 | 23.2  |
| 552 | 73.43 | 34.49 | 25.77 | 24.19 | 23.23 |
| 554 | 73.72 | 34.56 | 25.75 | 24.17 | 23.21 |
| 556 | 73.99 | 34.65 | 25.78 | 24.16 | 23.2  |
| 558 | 74.28 | 34.76 | 25.82 | 24.17 | 23.21 |
| 560 | 74.55 | 34.84 | 25.84 | 24.19 | 23.22 |
| 562 | 74.88 | 34.95 | 25.87 | 24.19 | 23.21 |
| 564 | 75.19 | 35.08 | 25.93 | 24.22 | 23.25 |
| 566 | 75.49 | 35.18 | 25.96 | 24.24 | 23.25 |
| 568 | 75.76 | 35.25 | 25.97 | 24.23 | 23.23 |
| 570 | 76.1  | 35.38 | 26.01 | 24.26 | 23.25 |
| 572 | 76.35 | 35.44 | 26.03 | 24.26 | 23.23 |
| 574 | 76.65 | 35.55 | 26.08 | 24.27 | 23.25 |

|     |       |       |       |       |       |
|-----|-------|-------|-------|-------|-------|
| 576 | 76.97 | 35.69 | 26.15 | 24.31 | 23.28 |
| 578 | 77.29 | 35.78 | 26.16 | 24.3  | 23.26 |
| 580 | 77.57 | 35.88 | 26.21 | 24.33 | 23.29 |
| 582 | 77.84 | 35.97 | 26.24 | 24.33 | 23.28 |
| 584 | 78.2  | 36.07 | 26.29 | 24.35 | 23.28 |
| 586 | 78.49 | 36.18 | 26.32 | 24.35 | 23.29 |
| 588 | 78.79 | 36.27 | 26.36 | 24.37 | 23.3  |
| 590 | 79.08 | 36.37 | 26.39 | 24.38 | 23.29 |
| 592 | 79.37 | 36.43 | 26.41 | 24.37 | 23.29 |
| 594 | 79.67 | 36.57 | 26.45 | 24.39 | 23.31 |
| 596 | 79.96 | 36.65 | 26.49 | 24.4  | 23.31 |
| 598 | 80.24 | 36.72 | 26.5  | 24.38 | 23.3  |
| 600 | 80.59 | 36.82 | 26.55 | 24.41 | 23.32 |
| 602 | 80.85 | 36.88 | 26.56 | 24.4  | 23.29 |
| 604 | 81.17 | 37.02 | 26.63 | 24.43 | 23.32 |
| 606 | 81.46 | 37.11 | 26.66 | 24.44 | 23.33 |
| 608 | 81.72 | 37.17 | 26.66 | 24.42 | 23.3  |
| 610 | 82.08 | 37.29 | 26.73 | 24.46 | 23.33 |
| 612 | 82.38 | 37.39 | 26.76 | 24.47 | 23.33 |
| 614 | 82.67 | 37.47 | 26.8  | 24.48 | 23.34 |
| 616 | 83.03 | 37.57 | 26.84 | 24.5  | 23.35 |
| 618 | 83.32 | 37.69 | 26.91 | 24.54 | 23.38 |
| 620 | 83.58 | 37.75 | 26.91 | 24.51 | 23.35 |
| 622 | 83.9  | 37.86 | 26.97 | 24.55 | 23.38 |
| 624 | 84.16 | 37.93 | 26.98 | 24.54 | 23.36 |
| 626 | 84.51 | 38.03 | 27.02 | 24.55 | 23.36 |
| 628 | 84.79 | 38.11 | 27.04 | 24.56 | 23.36 |
| 630 | 85.09 | 38.2  | 27.08 | 24.57 | 23.36 |
| 632 | 85.39 | 38.29 | 27.12 | 24.59 | 23.36 |
| 634 | 85.75 | 38.42 | 27.19 | 24.64 | 23.4  |
| 636 | 86.04 | 38.51 | 27.22 | 24.65 | 23.39 |
| 638 | 86.32 | 38.58 | 27.24 | 24.65 | 23.4  |
| 640 | 86.59 | 38.66 | 27.27 | 24.65 | 23.39 |
| 642 | 86.98 | 38.79 | 27.35 | 24.71 | 23.43 |
| 644 | 87.27 | 38.87 | 27.37 | 24.72 | 23.43 |
| 646 | 87.57 | 38.96 | 27.42 | 24.74 | 23.45 |
| 648 | 87.86 | 39.05 | 27.46 | 24.74 | 23.46 |
| 650 | 88.2  | 39.14 | 27.49 | 24.74 | 23.46 |
| 652 | 88.47 | 39.2  | 27.51 | 24.74 | 23.45 |
| 654 | 88.79 | 39.3  | 27.58 | 24.77 | 23.47 |
| 656 | 89.14 | 39.38 | 27.61 | 24.79 | 23.47 |
| 658 | 89.43 | 39.47 | 27.64 | 24.8  | 23.48 |
| 660 | 89.71 | 39.56 | 27.68 | 24.81 | 23.48 |
| 662 | 90    | 39.64 | 27.71 | 24.82 | 23.48 |

|     |        |       |       |       |       |
|-----|--------|-------|-------|-------|-------|
| 664 | 90.34  | 39.72 | 27.76 | 24.85 | 23.49 |
| 666 | 90.64  | 39.81 | 27.78 | 24.85 | 23.47 |
| 668 | 90.95  | 39.9  | 27.84 | 24.88 | 23.5  |
| 670 | 91.25  | 39.98 | 27.87 | 24.89 | 23.5  |
| 672 | 91.54  | 40.06 | 27.91 | 24.9  | 23.5  |
| 674 | 91.87  | 40.15 | 27.94 | 24.9  | 23.49 |
| 676 | 92.18  | 40.23 | 27.99 | 24.93 | 23.51 |
| 678 | 92.48  | 40.31 | 28.02 | 24.95 | 23.51 |
| 680 | 92.77  | 40.38 | 28.06 | 24.96 | 23.52 |
| 682 | 93.1   | 40.45 | 28.09 | 24.97 | 23.52 |
| 684 | 93.41  | 40.55 | 28.15 | 24.99 | 23.53 |
| 686 | 93.71  | 40.63 | 28.18 | 24.99 | 23.54 |
| 688 | 94     | 40.73 | 28.24 | 25.03 | 23.56 |
| 690 | 94.34  | 40.79 | 28.26 | 25.02 | 23.55 |
| 692 | 94.64  | 40.86 | 28.29 | 25.04 | 23.54 |
| 694 | 94.96  | 40.95 | 28.35 | 25.07 | 23.57 |
| 696 | 95.3   | 41.02 | 28.38 | 25.07 | 23.57 |
| 698 | 95.54  | 41.1  | 28.42 | 25.08 | 23.57 |
| 700 | 95.88  | 41.2  | 28.47 | 25.12 | 23.59 |
| 702 | 96.16  | 41.26 | 28.5  | 25.12 | 23.57 |
| 704 | 96.46  | 41.33 | 28.53 | 25.13 | 23.57 |
| 706 | 96.83  | 41.41 | 28.58 | 25.15 | 23.57 |
| 708 | 97.15  | 41.49 | 28.64 | 25.18 | 23.59 |
| 710 | 97.46  | 41.57 | 28.68 | 25.18 | 23.6  |
| 712 | 97.8   | 41.62 | 28.7  | 25.18 | 23.59 |
| 714 | 98.11  | 41.71 | 28.74 | 25.2  | 23.59 |
| 716 | 98.41  | 41.79 | 28.8  | 25.23 | 23.61 |
| 718 | 98.74  | 41.89 | 28.86 | 25.27 | 23.64 |
| 720 | 99.05  | 41.93 | 28.87 | 25.25 | 23.61 |
| 722 | 99.38  | 42.04 | 28.95 | 25.29 | 23.64 |
| 724 | 99.7   | 42.12 | 29    | 25.33 | 23.67 |
| 726 | 100.01 | 42.19 | 29.04 | 25.35 | 23.68 |
| 728 | 100.26 | 42.21 | 29.03 | 25.31 | 23.64 |
| 730 | 100.64 | 42.29 | 29.1  | 25.34 | 23.67 |
| 732 | 100.96 | 42.41 | 29.17 | 25.38 | 23.7  |
| 734 | 101.27 | 42.48 | 29.21 | 25.4  | 23.69 |
| 736 | 101.63 | 42.54 | 29.25 | 25.42 | 23.7  |
| 738 | 101.94 | 42.62 | 29.29 | 25.44 | 23.7  |
| 740 | 102.22 | 42.66 | 29.32 | 25.43 | 23.68 |
| 742 | 102.53 | 42.72 | 29.36 | 25.46 | 23.69 |
| 744 | 102.89 | 42.81 | 29.42 | 25.47 | 23.71 |
| 746 | 103.18 | 42.88 | 29.44 | 25.48 | 23.71 |
| 748 | 103.49 | 42.95 | 29.51 | 25.52 | 23.72 |
| 750 | 103.81 | 43.03 | 29.56 | 25.55 | 23.73 |

|     |        |       |       |       |       |
|-----|--------|-------|-------|-------|-------|
| 752 | 104.12 | 43.1  | 29.6  | 25.56 | 23.74 |
| 754 | 104.47 | 43.15 | 29.63 | 25.55 | 23.72 |
| 756 | 104.78 | 43.22 | 29.67 | 25.57 | 23.73 |
| 758 | 105.13 | 43.33 | 29.75 | 25.62 | 23.76 |
| 760 | 105.44 | 43.39 | 29.79 | 25.64 | 23.77 |
| 762 | 105.81 | 43.46 | 29.82 | 25.66 | 23.77 |
| 764 | 106.15 | 43.56 | 29.91 | 25.7  | 23.81 |
| 766 | 106.43 | 43.58 | 29.92 | 25.69 | 23.79 |
| 768 | 106.76 | 43.63 | 29.94 | 25.7  | 23.8  |
| 770 | 107.09 | 43.73 | 30    | 25.72 | 23.81 |
| 772 | 107.37 | 43.76 | 30.03 | 25.73 | 23.8  |
| 774 | 107.71 | 43.85 | 30.1  | 25.79 | 23.84 |
| 776 | 108.05 | 43.91 | 30.14 | 25.79 | 23.82 |
| 778 | 108.35 | 43.95 | 30.15 | 25.77 | 23.81 |
| 780 | 108.68 | 44.03 | 30.23 | 25.82 | 23.85 |
| 782 | 108.98 | 44.08 | 30.26 | 25.81 | 23.84 |
| 784 | 109.32 | 44.16 | 30.31 | 25.85 | 23.86 |
| 786 | 109.71 | 44.26 | 30.38 | 25.91 | 23.88 |
| 788 | 109.99 | 44.32 | 30.41 | 25.91 | 23.86 |
| 790 | 110.33 | 44.37 | 30.45 | 25.93 | 23.88 |
| 792 | 110.66 | 44.42 | 30.49 | 25.94 | 23.87 |
| 794 | 111.04 | 44.51 | 30.55 | 25.97 | 23.9  |
| 796 | 111.37 | 44.59 | 30.61 | 26.01 | 23.93 |
| 798 | 111.68 | 44.63 | 30.65 | 26.02 | 23.92 |
| 800 | 112.05 | 44.69 | 30.69 | 26.04 | 23.93 |
| 802 | 112.35 | 44.76 | 30.73 | 26.06 | 23.93 |
| 804 | 112.64 | 44.8  | 30.75 | 26.07 | 23.93 |
| 806 | 112.96 | 44.87 | 30.81 | 26.1  | 23.95 |
| 808 | 113.28 | 44.93 | 30.85 | 26.11 | 23.96 |
| 810 | 113.66 | 44.98 | 30.9  | 26.12 | 23.95 |
| 812 | 113.97 | 45.03 | 30.93 | 26.15 | 23.95 |
| 814 | 114.29 | 45.09 | 30.98 | 26.17 | 23.95 |
| 816 | 114.61 | 45.13 | 31    | 26.17 | 23.95 |
| 818 | 114.95 | 45.17 | 31.03 | 26.17 | 23.94 |
| 820 | 115.29 | 45.24 | 31.09 | 26.19 | 23.95 |
| 822 | 115.62 | 45.32 | 31.14 | 26.24 | 23.98 |
| 824 | 115.92 | 45.34 | 31.15 | 26.24 | 23.97 |
| 826 | 116.32 | 45.44 | 31.23 | 26.28 | 24    |
| 828 | 116.61 | 45.47 | 31.27 | 26.3  | 24.01 |
| 830 | 116.96 | 45.54 | 31.32 | 26.33 | 24.02 |
| 832 | 117.35 | 45.6  | 31.37 | 26.35 | 24.03 |
| 834 | 117.65 | 45.63 | 31.38 | 26.35 | 24.02 |
| 836 | 117.97 | 45.67 | 31.43 | 26.36 | 24.01 |
| 838 | 118.31 | 45.75 | 31.49 | 26.4  | 24.04 |



|     |        |       |       |       |       |
|-----|--------|-------|-------|-------|-------|
| 840 | 118.65 | 45.85 | 31.57 | 26.45 | 24.09 |
| 842 | 119.02 | 45.9  | 31.61 | 26.46 | 24.07 |
| 844 | 119.34 | 45.95 | 31.64 | 26.49 | 24.08 |
| 846 | 119.66 | 45.99 | 31.68 | 26.5  | 24.1  |
| 848 | 119.97 | 46.03 | 31.71 | 26.5  | 24.09 |
| 850 | 120.35 | 46.07 | 31.75 | 26.51 | 24.1  |
| 852 | 120.68 | 46.14 | 31.8  | 26.54 | 24.11 |
| 854 | 121.01 | 46.19 | 31.84 | 26.56 | 24.11 |
| 856 | 121.34 | 46.23 | 31.88 | 26.58 | 24.11 |
| 858 | 121.73 | 46.29 | 31.93 | 26.62 | 24.15 |
| 860 | 122.06 | 46.33 | 31.97 | 26.62 | 24.14 |
| 862 | 122.39 | 46.39 | 32.02 | 26.67 | 24.16 |
| 864 | 122.7  | 46.43 | 32.04 | 26.65 | 24.13 |
| 866 | 123.08 | 46.49 | 32.09 | 26.69 | 24.16 |
| 868 | 123.41 | 46.55 | 32.14 | 26.72 | 24.16 |
| 870 | 123.75 | 46.59 | 32.19 | 26.74 | 24.17 |
| 872 | 124.16 | 46.64 | 32.24 | 26.77 | 24.2  |
| 874 | 124.48 | 46.69 | 32.27 | 26.77 | 24.19 |
| 876 | 124.81 | 46.74 | 32.31 | 26.79 | 24.2  |
| 878 | 125.16 | 46.8  | 32.37 | 26.83 | 24.25 |
| 880 | 125.51 | 46.86 | 32.43 | 26.88 | 24.27 |
| 882 | 125.89 | 46.88 | 32.46 | 26.87 | 24.25 |
| 884 | 126.19 | 46.91 | 32.47 | 26.87 | 24.23 |
| 886 | 126.52 | 46.98 | 32.52 | 26.89 | 24.24 |
| 888 | 126.86 | 47.03 | 32.58 | 26.94 | 24.27 |
| 890 | 127.28 | 47.09 | 32.63 | 26.97 | 24.29 |
| 892 | 127.6  | 47.14 | 32.67 | 26.99 | 24.29 |
| 894 | 127.93 | 47.18 | 32.72 | 27    | 24.3  |
| 896 | 128.3  | 47.26 | 32.79 | 27.06 | 24.35 |
| 898 | 128.63 | 47.28 | 32.79 | 27.05 | 24.32 |
| 900 | 128.98 | 47.35 | 32.87 | 27.1  | 24.34 |
| 902 | 129.34 | 47.4  | 32.92 | 27.13 | 24.37 |
| 904 | 129.73 | 47.44 | 32.95 | 27.14 | 24.38 |
| 906 | 130.07 | 47.48 | 33    | 27.15 | 24.39 |
| 908 | 130.42 | 47.52 | 33.03 | 27.18 | 24.39 |
| 910 | 130.73 | 47.54 | 33.06 | 27.18 | 24.37 |
| 912 | 131.08 | 47.6  | 33.11 | 27.22 | 24.4  |
| 914 | 131.48 | 47.65 | 33.16 | 27.24 | 24.42 |
| 916 | 131.82 | 47.69 | 33.2  | 27.26 | 24.42 |
| 918 | 132.17 | 47.73 | 33.25 | 27.29 | 24.43 |
| 920 | 132.59 | 47.8  | 33.31 | 27.33 | 24.45 |
| 922 | 132.91 | 47.85 | 33.35 | 27.35 | 24.47 |
| 924 | 133.24 | 47.88 | 33.38 | 27.37 | 24.48 |
| 926 | 133.58 | 47.91 | 33.41 | 27.37 | 24.46 |

|      |        |       |       |       |       |
|------|--------|-------|-------|-------|-------|
| 928  | 133.98 | 47.95 | 33.46 | 27.4  | 24.47 |
| 930  | 134.32 | 48    | 33.51 | 27.41 | 24.48 |
| 932  | 134.63 | 48.01 | 33.52 | 27.41 | 24.46 |
| 934  | 134.98 | 48.06 | 33.57 | 27.44 | 24.48 |
| 936  | 135.34 | 48.1  | 33.62 | 27.47 | 24.5  |
| 938  | 135.79 | 48.17 | 33.7  | 27.52 | 24.54 |
| 940  | 136.13 | 48.21 | 33.74 | 27.54 | 24.56 |
| 942  | 136.42 | 48.23 | 33.74 | 27.52 | 24.53 |
| 944  | 136.81 | 48.27 | 33.78 | 27.54 | 24.53 |
| 946  | 137.16 | 48.32 | 33.83 | 27.58 | 24.53 |
| 948  | 137.53 | 48.37 | 33.88 | 27.61 | 24.54 |
| 950  | 137.89 | 48.43 | 33.95 | 27.65 | 24.58 |
| 952  | 138.23 | 48.45 | 33.97 | 27.66 | 24.56 |
| 954  | 138.57 | 48.48 | 33.99 | 27.67 | 24.57 |
| 956  | 139.02 | 48.59 | 34.09 | 27.75 | 24.63 |
| 958  | 139.34 | 48.61 | 34.1  | 27.75 | 24.62 |
| 960  | 139.66 | 48.64 | 34.14 | 27.77 | 24.61 |
| 962  | 140.07 | 48.68 | 34.2  | 27.79 | 24.65 |
| 964  | 140.43 | 48.72 | 34.23 | 27.81 | 24.65 |
| 966  | 140.79 | 48.77 | 34.28 | 27.84 | 24.67 |
| 968  | 141.12 | 48.79 | 34.31 | 27.86 | 24.68 |
| 970  | 141.57 | 48.86 | 34.37 | 27.89 | 24.69 |
| 972  | 141.93 | 48.89 | 34.4  | 27.9  | 24.69 |
| 974  | 142.28 | 48.93 | 34.45 | 27.93 | 24.71 |
| 976  | 142.67 | 48.95 | 34.47 | 27.94 | 24.69 |
| 978  | 143.03 | 49.01 | 34.52 | 27.98 | 24.72 |
| 980  | 143.37 | 49.05 | 34.56 | 28    | 24.72 |
| 982  | 143.74 | 49.09 | 34.6  | 28.02 | 24.73 |
| 984  | 144.08 | 49.13 | 34.64 | 28.05 | 24.74 |
| 986  | 144.49 | 49.19 | 34.7  | 28.08 | 24.76 |
| 988  | 144.83 | 49.22 | 34.74 | 28.1  | 24.77 |
| 990  | 145.18 | 49.25 | 34.77 | 28.11 | 24.78 |
| 992  | 145.55 | 49.28 | 34.8  | 28.12 | 24.79 |
| 994  | 145.97 | 49.32 | 34.84 | 28.15 | 24.8  |
| 996  | 146.33 | 49.36 | 34.89 | 28.18 | 24.82 |
| 998  | 146.69 | 49.39 | 34.93 | 28.2  | 24.82 |
| 1000 | 147.04 | 49.43 | 34.96 | 28.21 | 24.83 |
| 1002 | 147.39 | 49.45 | 34.99 | 28.22 | 24.83 |
| 1004 | 147.8  | 49.5  | 35.03 | 28.25 | 24.83 |
| 1006 | 148.15 | 49.56 | 35.09 | 28.29 | 24.85 |
| 1008 | 148.56 | 49.59 | 35.12 | 28.32 | 24.87 |
| 1010 | 148.93 | 49.63 | 35.17 | 28.33 | 24.88 |
| 1012 | 149.31 | 49.67 | 35.21 | 28.36 | 24.89 |
| 1014 | 149.68 | 49.7  | 35.25 | 28.38 | 24.9  |

|      |        |       |       |       |       |
|------|--------|-------|-------|-------|-------|
| 1016 | 150.04 | 49.74 | 35.28 | 28.4  | 24.9  |
| 1018 | 150.44 | 49.75 | 35.3  | 28.4  | 24.91 |
| 1020 | 150.8  | 49.8  | 35.35 | 28.42 | 24.93 |
| 1022 | 151.14 | 49.81 | 35.37 | 28.42 | 24.91 |
| 1024 | 151.52 | 49.86 | 35.42 | 28.46 | 24.93 |
| 1026 | 151.93 | 49.88 | 35.46 | 28.48 | 24.94 |
| 1028 | 152.27 | 49.92 | 35.48 | 28.49 | 24.93 |
| 1030 | 152.65 | 49.98 | 35.54 | 28.53 | 24.97 |
| 1032 | 153    | 50.01 | 35.56 | 28.55 | 24.96 |
| 1034 | 153.42 | 50.05 | 35.58 | 28.56 | 24.96 |
| 1036 | 153.82 | 50.11 | 35.67 | 28.63 | 25.01 |
| 1038 | 154.19 | 50.15 | 35.7  | 28.64 | 25.02 |
| 1040 | 154.61 | 50.18 | 35.75 | 28.67 | 25.03 |
| 1042 | 154.96 | 50.23 | 35.78 | 28.7  | 25.04 |
| 1044 | 155.31 | 50.27 | 35.82 | 28.72 | 25.04 |
| 1046 | 155.65 | 50.3  | 35.86 | 28.73 | 25.05 |
| 1048 | 156.02 | 50.34 | 35.9  | 28.75 | 25.07 |
| 1050 | 156.41 | 50.4  | 35.97 | 28.8  | 25.12 |
| 1052 | 156.8  | 50.4  | 35.98 | 28.79 | 25.1  |
| 1054 | 157.19 | 50.45 | 36.03 | 28.84 | 25.12 |
| 1056 | 157.57 | 50.49 | 36.06 | 28.86 | 25.12 |
| 1058 | 157.97 | 50.51 | 36.08 | 28.85 | 25.12 |
| 1060 | 158.34 | 50.54 | 36.12 | 28.88 | 25.12 |
| 1062 | 158.7  | 50.58 | 36.16 | 28.9  | 25.13 |
| 1064 | 159.06 | 50.62 | 36.2  | 28.94 | 25.14 |
| 1066 | 159.47 | 50.66 | 36.23 | 28.96 | 25.15 |
| 1068 | 159.87 | 50.73 | 36.31 | 29.01 | 25.18 |
| 1070 | 160.22 | 50.76 | 36.34 | 29.02 | 25.2  |
| 1072 | 160.65 | 50.77 | 36.37 | 29.04 | 25.2  |
| 1074 | 161.04 | 50.82 | 36.4  | 29.06 | 25.21 |
| 1076 | 161.4  | 50.87 | 36.46 | 29.1  | 25.23 |
| 1078 | 161.74 | 50.87 | 36.46 | 29.08 | 25.21 |
| 1080 | 162.14 | 50.91 | 36.53 | 29.14 | 25.26 |
| 1082 | 162.6  | 50.98 | 36.6  | 29.18 | 25.28 |
| 1084 | 162.96 | 51.02 | 36.64 | 29.21 | 25.3  |
| 1086 | 163.31 | 51.05 | 36.67 | 29.23 | 25.3  |
| 1088 | 163.66 | 51.09 | 36.7  | 29.25 | 25.32 |
| 1090 | 164.09 | 51.13 | 36.75 | 29.28 | 25.33 |
| 1092 | 164.46 | 51.18 | 36.79 | 29.31 | 25.34 |
| 1094 | 164.84 | 51.21 | 36.82 | 29.34 | 25.34 |
| 1096 | 165.26 | 51.25 | 36.86 | 29.35 | 25.35 |
| 1098 | 165.65 | 51.3  | 36.9  | 29.39 | 25.39 |
| 1100 | 166    | 51.32 | 36.93 | 29.4  | 25.38 |
| 1102 | 166.32 | 51.34 | 36.95 | 29.41 | 25.36 |

|      |        |       |       |       |       |
|------|--------|-------|-------|-------|-------|
| 1104 | 166.75 | 51.38 | 37.01 | 29.45 | 25.39 |
| 1106 | 167.12 | 51.41 | 37.03 | 29.44 | 25.39 |
| 1108 | 167.52 | 51.46 | 37.09 | 29.49 | 25.43 |
| 1110 | 167.87 | 51.48 | 37.11 | 29.5  | 25.42 |
| 1112 | 168.25 | 51.51 | 37.15 | 29.52 | 25.42 |
| 1114 | 168.68 | 51.55 | 37.18 | 29.54 | 25.44 |
| 1116 | 169.08 | 51.6  | 37.24 | 29.59 | 25.45 |
| 1118 | 169.47 | 51.67 | 37.31 | 29.63 | 25.5  |
| 1120 | 169.86 | 51.66 | 37.3  | 29.62 | 25.47 |
| 1122 | 170.21 | 51.68 | 37.32 | 29.63 | 25.48 |
| 1124 | 170.57 | 51.7  | 37.35 | 29.64 | 25.48 |
| 1126 | 170.97 | 51.77 | 37.42 | 29.7  | 25.52 |
| 1128 | 171.34 | 51.82 | 37.46 | 29.73 | 25.54 |
| 1130 | 171.74 | 51.83 | 37.46 | 29.72 | 25.52 |
| 1132 | 172.12 | 51.86 | 37.5  | 29.74 | 25.52 |
| 1134 | 172.5  | 51.9  | 37.55 | 29.77 | 25.54 |
| 1136 | 172.93 | 51.98 | 37.63 | 29.84 | 25.6  |
| 1138 | 173.38 | 52.02 | 37.68 | 29.87 | 25.61 |
| 1140 | 173.75 | 52.06 | 37.71 | 29.89 | 25.62 |
| 1142 | 174.12 | 52.09 | 37.75 | 29.91 | 25.63 |
| 1144 | 174.44 | 52.1  | 37.76 | 29.91 | 25.61 |
| 1146 | 174.86 | 52.14 | 37.77 | 29.93 | 25.62 |
| 1148 | 175.2  | 52.19 | 37.84 | 29.98 | 25.66 |
| 1150 | 175.63 | 52.24 | 37.89 | 30    | 25.67 |
| 1152 | 176.08 | 52.27 | 37.93 | 30.02 | 25.67 |
| 1154 | 176.45 | 52.3  | 37.95 | 30.03 | 25.67 |
| 1156 | 176.83 | 52.36 | 38    | 30.07 | 25.69 |
| 1158 | 177.16 | 52.37 | 38    | 30.07 | 25.67 |
| 1160 | 177.49 | 52.37 | 38    | 30.06 | 25.65 |
| 1162 | 177.91 | 52.41 | 38.04 | 30.08 | 25.66 |
| 1164 | 178.32 | 52.46 | 38.1  | 30.12 | 25.7  |
| 1166 | 178.69 | 52.48 | 38.13 | 30.14 | 25.69 |
| 1168 | 179.09 | 52.54 | 38.17 | 30.17 | 25.71 |
| 1170 | 179.56 | 52.6  | 38.24 | 30.22 | 25.76 |
| 1172 | 179.94 | 52.63 | 38.28 | 30.24 | 25.77 |
| 1174 | 180.31 | 52.66 | 38.31 | 30.26 | 25.77 |
| 1176 | 180.73 | 52.68 | 38.34 | 30.26 | 25.77 |
| 1178 | 181.14 | 52.73 | 38.39 | 30.29 | 25.79 |
| 1180 | 181.5  | 52.76 | 38.43 | 30.32 | 25.81 |
| 1182 | 181.86 | 52.79 | 38.44 | 30.33 | 25.81 |
| 1184 | 182.24 | 52.84 | 38.49 | 30.36 | 25.82 |
| 1186 | 182.67 | 52.88 | 38.53 | 30.38 | 25.83 |
| 1188 | 183.06 | 52.91 | 38.56 | 30.41 | 25.85 |
| 1190 | 183.42 | 52.93 | 38.6  | 30.43 | 25.86 |

|      |        |       |       |       |       |
|------|--------|-------|-------|-------|-------|
| 1192 | 183.82 | 52.99 | 38.64 | 30.45 | 25.87 |
| 1194 | 184.27 | 53.02 | 38.67 | 30.47 | 25.87 |
| 1196 | 184.65 | 53.05 | 38.71 | 30.48 | 25.89 |
| 1198 | 185.03 | 53.11 | 38.75 | 30.53 | 25.91 |
| 1200 | 185.45 | 53.13 | 38.77 | 30.53 | 25.91 |
| 1202 | 185.84 | 53.17 | 38.8  | 30.55 | 25.92 |
| 1204 | 186.22 | 53.21 | 38.84 | 30.57 | 25.93 |
| 1206 | 186.61 | 53.25 | 38.88 | 30.59 | 25.94 |
| 1208 | 187.08 | 53.3  | 38.94 | 30.64 | 25.95 |
| 1210 | 187.45 | 53.34 | 38.97 | 30.67 | 25.97 |
| 1212 | 187.81 | 53.36 | 38.99 | 30.67 | 25.97 |
| 1214 | 188.2  | 53.43 | 39.04 | 30.71 | 25.99 |
| 1216 | 188.57 | 53.45 | 39.07 | 30.72 | 26    |
| 1218 | 189    | 53.5  | 39.11 | 30.75 | 26    |
| 1220 | 189.37 | 53.51 | 39.13 | 30.75 | 26    |
| 1222 | 189.8  | 53.58 | 39.2  | 30.81 | 26.05 |
| 1224 | 190.17 | 53.6  | 39.22 | 30.81 | 26.05 |
| 1226 | 190.65 | 53.67 | 39.27 | 30.85 | 26.09 |
| 1228 | 191.03 | 53.69 | 39.31 | 30.86 | 26.09 |
| 1230 | 191.42 | 53.74 | 39.36 | 30.9  | 26.12 |
| 1232 | 191.84 | 53.75 | 39.38 | 30.9  | 26.11 |
| 1234 | 192.21 | 53.77 | 39.37 | 30.88 | 26.09 |
| 1236 | 192.62 | 53.85 | 39.48 | 30.96 | 26.15 |
| 1238 | 193    | 53.89 | 39.5  | 30.99 | 26.17 |
| 1240 | 193.44 | 53.93 | 39.53 | 31.01 | 26.18 |
| 1242 | 193.83 | 53.97 | 39.57 | 31.03 | 26.19 |
| 1244 | 194.22 | 54.01 | 39.61 | 31.05 | 26.2  |
| 1246 | 194.64 | 54.06 | 39.66 | 31.1  | 26.24 |
| 1248 | 195.01 | 54.08 | 39.68 | 31.1  | 26.23 |
| 1250 | 195.45 | 54.11 | 39.71 | 31.11 | 26.23 |
| 1252 | 195.83 | 54.15 | 39.75 | 31.13 | 26.24 |
| 1254 | 196.19 | 54.14 | 39.75 | 31.12 | 26.21 |
| 1256 | 196.6  | 54.21 | 39.81 | 31.16 | 26.25 |
| 1258 | 197.05 | 54.27 | 39.85 | 31.19 | 26.27 |
| 1260 | 197.43 | 54.3  | 39.89 | 31.22 | 26.28 |
| 1262 | 197.82 | 54.34 | 39.92 | 31.23 | 26.29 |
| 1264 | 198.27 | 54.35 | 39.93 | 31.23 | 26.27 |
| 1266 | 198.67 | 54.4  | 39.99 | 31.27 | 26.3  |
| 1268 | 199.07 | 54.44 | 40.03 | 31.3  | 26.32 |
| 1270 | 199.46 | 54.49 | 40.06 | 31.32 | 26.34 |
| 1272 | 199.85 | 54.52 | 40.1  | 31.34 | 26.34 |
| 1274 | 200.28 | 54.56 | 40.13 | 31.36 | 26.33 |
| 1276 | 200.69 | 54.6  | 40.17 | 31.39 | 26.36 |
| 1278 | 201.08 | 54.63 | 40.21 | 31.42 | 26.37 |

|      |        |       |       |       |       |
|------|--------|-------|-------|-------|-------|
| 1280 | 201.5  | 54.68 | 40.25 | 31.46 | 26.4  |
| 1282 | 201.94 | 54.7  | 40.27 | 31.44 | 26.38 |
| 1284 | 202.35 | 54.76 | 40.33 | 31.5  | 26.42 |
| 1286 | 202.74 | 54.79 | 40.36 | 31.51 | 26.42 |
| 1288 | 203.13 | 54.83 | 40.39 | 31.53 | 26.43 |
| 1290 | 203.57 | 54.85 | 40.41 | 31.53 | 26.43 |
| 1292 | 203.97 | 54.88 | 40.45 | 31.54 | 26.45 |
| 1294 | 204.34 | 54.91 | 40.48 | 31.57 | 26.45 |
| 1296 | 204.74 | 54.97 | 40.54 | 31.61 | 26.49 |
| 1298 | 205.22 | 55.03 | 40.59 | 31.65 | 26.53 |
| 1300 | 205.61 | 55.06 | 40.62 | 31.66 | 26.52 |
| 1302 | 206.05 | 55.13 | 40.68 | 31.71 | 26.56 |
| 1304 | 206.49 | 55.16 | 40.71 | 31.73 | 26.57 |
| 1306 | 206.86 | 55.17 | 40.73 | 31.72 | 26.56 |
| 1308 | 207.22 | 55.18 | 40.73 | 31.72 | 26.53 |
| 1310 | 207.65 | 55.25 | 40.8  | 31.76 | 26.57 |
| 1312 | 208.08 | 55.28 | 40.82 | 31.77 | 26.56 |
| 1314 | 208.48 | 55.33 | 40.87 | 31.82 | 26.61 |
| 1316 | 208.91 | 55.39 | 40.93 | 31.84 | 26.63 |
| 1318 | 209.31 | 55.42 | 40.97 | 31.88 | 26.65 |
| 1320 | 209.69 | 55.45 | 40.97 | 31.87 | 26.62 |
| 1322 | 210.15 | 55.48 | 41.01 | 31.89 | 26.63 |
| 1324 | 210.54 | 55.52 | 41.05 | 31.92 | 26.63 |
| 1326 | 210.94 | 55.57 | 41.09 | 31.95 | 26.66 |
| 1328 | 211.33 | 55.61 | 41.13 | 31.98 | 26.67 |
| 1330 | 211.77 | 55.62 | 41.15 | 31.98 | 26.68 |
| 1332 | 212.18 | 55.64 | 41.17 | 31.98 | 26.66 |
| 1334 | 212.56 | 55.67 | 41.19 | 31.98 | 26.67 |
| 1336 | 213.03 | 55.7  | 41.22 | 32.01 | 26.67 |
| 1338 | 213.47 | 55.77 | 41.28 | 32.06 | 26.7  |
| 1340 | 213.88 | 55.82 | 41.34 | 32.1  | 26.74 |
| 1342 | 214.29 | 55.87 | 41.39 | 32.13 | 26.76 |
| 1344 | 214.7  | 55.92 | 41.43 | 32.15 | 26.77 |
| 1346 | 215.15 | 55.96 | 41.46 | 32.17 | 26.78 |
| 1348 | 215.56 | 55.99 | 41.5  | 32.2  | 26.8  |
| 1350 | 215.95 | 56.02 | 41.53 | 32.22 | 26.81 |
| 1352 | 216.37 | 56.06 | 41.57 | 32.23 | 26.81 |
| 1354 | 216.84 | 56.08 | 41.58 | 32.24 | 26.82 |
| 1356 | 217.25 | 56.13 | 41.63 | 32.27 | 26.83 |
| 1358 | 217.65 | 56.17 | 41.67 | 32.29 | 26.85 |
| 1360 | 218.04 | 56.2  | 41.7  | 32.31 | 26.85 |
| 1362 | 218.48 | 56.22 | 41.72 | 32.31 | 26.85 |
| 1364 | 218.88 | 56.25 | 41.75 | 32.31 | 26.85 |
| 1366 | 219.3  | 56.3  | 41.8  | 32.35 | 26.87 |

|      |        |       |       |       |       |
|------|--------|-------|-------|-------|-------|
| 1368 | 219.76 | 56.35 | 41.84 | 32.38 | 26.9  |
| 1370 | 220.15 | 56.38 | 41.86 | 32.39 | 26.87 |
| 1372 | 220.62 | 56.46 | 41.94 | 32.45 | 26.93 |
| 1374 | 221.02 | 56.47 | 41.95 | 32.46 | 26.93 |
| 1376 | 221.43 | 56.49 | 41.98 | 32.46 | 26.94 |
| 1378 | 221.91 | 56.54 | 42.02 | 32.49 | 26.94 |
| 1380 | 222.34 | 56.62 | 42.09 | 32.56 | 26.99 |
| 1382 | 222.73 | 56.64 | 42.11 | 32.57 | 26.99 |
| 1384 | 223.11 | 56.68 | 42.15 | 32.6  | 27.01 |
| 1386 | 223.6  | 56.74 | 42.2  | 32.64 | 27.02 |
| 1388 | 224.01 | 56.75 | 42.22 | 32.62 | 27.01 |
| 1390 | 224.41 | 56.76 | 42.24 | 32.64 | 27    |
| 1392 | 224.91 | 56.81 | 42.28 | 32.66 | 27.02 |
| 1394 | 225.33 | 56.85 | 42.3  | 32.67 | 27.03 |
| 1396 | 225.76 | 56.89 | 42.35 | 32.71 | 27.06 |
| 1398 | 226.19 | 56.96 | 42.41 | 32.74 | 27.06 |
| 1400 | 226.56 | 56.98 | 42.42 | 32.75 | 27.07 |
| 1402 | 227.02 | 57.02 | 42.48 | 32.77 | 27.09 |
| 1404 | 227.43 | 57.08 | 42.51 | 32.82 | 27.11 |
| 1406 | 227.82 | 57.08 | 42.52 | 32.8  | 27.09 |
| 1408 | 228.34 | 57.12 | 42.56 | 32.83 | 27.12 |
| 1410 | 228.76 | 57.15 | 42.6  | 32.85 | 27.13 |
| 1412 | 229.18 | 57.19 | 42.65 | 32.87 | 27.13 |
| 1414 | 229.65 | 57.26 | 42.71 | 32.92 | 27.19 |
| 1416 | 230.12 | 57.29 | 42.74 | 32.94 | 27.2  |
| 1418 | 230.53 | 57.31 | 42.76 | 32.94 | 27.18 |
| 1420 | 230.93 | 57.31 | 42.76 | 32.93 | 27.16 |
| 1422 | 231.36 | 57.37 | 42.82 | 32.97 | 27.2  |
| 1424 | 231.86 | 57.44 | 42.89 | 33.02 | 27.24 |
| 1426 | 232.27 | 57.49 | 42.93 | 33.05 | 27.26 |
| 1428 | 232.69 | 57.52 | 42.96 | 33.08 | 27.26 |
| 1430 | 233.14 | 57.58 | 43.02 | 33.12 | 27.29 |
| 1432 | 233.57 | 57.61 | 43.05 | 33.14 | 27.3  |
| 1434 | 234.07 | 57.66 | 43.09 | 33.18 | 27.31 |
| 1436 | 234.47 | 57.68 | 43.11 | 33.18 | 27.32 |
| 1438 | 234.88 | 57.73 | 43.15 | 33.21 | 27.33 |
| 1440 | 235.35 | 57.76 | 43.18 | 33.22 | 27.33 |
| 1442 | 235.76 | 57.79 | 43.22 | 33.24 | 27.35 |
| 1444 | 236.18 | 57.82 | 43.25 | 33.26 | 27.36 |
| 1446 | 236.57 | 57.84 | 43.27 | 33.26 | 27.36 |
| 1448 | 237.01 | 57.88 | 43.32 | 33.29 | 27.38 |
| 1450 | 237.53 | 57.93 | 43.35 | 33.32 | 27.39 |
| 1452 | 237.97 | 57.96 | 43.39 | 33.34 | 27.4  |
| 1454 | 238.39 | 57.99 | 43.42 | 33.35 | 27.41 |

|      |        |       |       |       |       |
|------|--------|-------|-------|-------|-------|
| 1456 | 238.81 | 58.03 | 43.46 | 33.38 | 27.42 |
| 1458 | 239.29 | 58.06 | 43.49 | 33.4  | 27.43 |
| 1460 | 239.73 | 58.13 | 43.56 | 33.46 | 27.46 |
| 1462 | 240.13 | 58.15 | 43.58 | 33.46 | 27.45 |
| 1464 | 240.62 | 58.17 | 43.61 | 33.48 | 27.45 |
| 1466 | 241.05 | 58.22 | 43.65 | 33.5  | 27.46 |
| 1468 | 241.49 | 58.25 | 43.68 | 33.52 | 27.48 |
| 1470 | 241.94 | 58.28 | 43.71 | 33.54 | 27.49 |
| 1472 | 242.39 | 58.35 | 43.78 | 33.61 | 27.54 |
| 1474 | 242.9  | 58.39 | 43.83 | 33.63 | 27.56 |
| 1476 | 243.31 | 58.41 | 43.85 | 33.63 | 27.55 |
| 1478 | 243.72 | 58.44 | 43.88 | 33.64 | 27.55 |
| 1480 | 244.17 | 58.45 | 43.89 | 33.63 | 27.54 |
| 1482 | 244.59 | 58.49 | 43.92 | 33.65 | 27.56 |
| 1484 | 245    | 58.52 | 43.94 | 33.65 | 27.54 |
| 1486 | 245.45 | 58.56 | 43.99 | 33.7  | 27.57 |
| 1488 | 245.89 | 58.6  | 44.04 | 33.71 | 27.59 |
| 1490 | 246.41 | 58.64 | 44.07 | 33.74 | 27.6  |
| 1492 | 246.85 | 58.67 | 44.1  | 33.76 | 27.61 |
| 1494 | 247.27 | 58.71 | 44.14 | 33.79 | 27.62 |
| 1496 | 247.71 | 58.76 | 44.2  | 33.83 | 27.65 |
| 1498 | 248.22 | 58.81 | 44.25 | 33.84 | 27.66 |
| 1500 | 248.63 | 58.84 | 44.27 | 33.88 | 27.67 |
| 1502 | 249.05 | 58.88 | 44.31 | 33.91 | 27.69 |
| 1504 | 249.52 | 58.93 | 44.36 | 33.95 | 27.72 |
| 1506 | 250.04 | 58.97 | 44.39 | 33.97 | 27.72 |
| 1508 | 250.49 | 59.01 | 44.45 | 34    | 27.75 |
| 1510 | 250.94 | 59.06 | 44.49 | 34.03 | 27.77 |
| 1512 | 251.44 | 59.1  | 44.53 | 34.05 | 27.78 |
| 1514 | 251.81 | 59.09 | 44.51 | 34.03 | 27.75 |
| 1516 | 252.25 | 59.17 | 44.59 | 34.1  | 27.8  |
| 1518 | 252.64 | 59.18 | 44.6  | 34.09 | 27.78 |
| 1520 | 253.09 | 59.22 | 44.64 | 34.12 | 27.8  |
| 1522 | 253.64 | 59.28 | 44.71 | 34.16 | 27.83 |
| 1524 | 254.09 | 59.31 | 44.74 | 34.18 | 27.85 |
| 1526 | 254.53 | 59.34 | 44.77 | 34.21 | 27.86 |
| 1528 | 254.98 | 59.37 | 44.81 | 34.23 | 27.87 |
| 1530 | 255.49 | 59.41 | 44.85 | 34.25 | 27.88 |
| 1532 | 255.92 | 59.44 | 44.89 | 34.26 | 27.89 |
| 1534 | 256.33 | 59.48 | 44.92 | 34.29 | 27.9  |
| 1536 | 256.75 | 59.52 | 44.95 | 34.32 | 27.92 |
| 1538 | 257.25 | 59.56 | 44.99 | 34.34 | 27.93 |
| 1540 | 257.68 | 59.59 | 45.02 | 34.34 | 27.94 |
| 1542 | 258.12 | 59.62 | 45.06 | 34.37 | 27.95 |



|      |        |       |       |       |       |
|------|--------|-------|-------|-------|-------|
| 1544 | 258.66 | 59.65 | 45.1  | 34.39 | 27.95 |
| 1546 | 259.12 | 59.69 | 45.13 | 34.41 | 27.96 |
| 1548 | 259.58 | 59.73 | 45.17 | 34.44 | 27.98 |
| 1550 | 260.02 | 59.76 | 45.2  | 34.47 | 27.99 |
| 1552 | 260.47 | 59.82 | 45.27 | 34.52 | 28.04 |
| 1554 | 260.94 | 59.84 | 45.27 | 34.51 | 28.01 |
| 1556 | 261.36 | 59.88 | 45.31 | 34.53 | 28.03 |
| 1558 | 261.81 | 59.95 | 45.37 | 34.58 | 28.08 |
| 1560 | 262.27 | 59.98 | 45.41 | 34.61 | 28.09 |
| 1562 | 262.77 | 59.99 | 45.43 | 34.61 | 28.08 |
| 1564 | 263.27 | 60.05 | 45.49 | 34.67 | 28.11 |
| 1566 | 263.73 | 60.1  | 45.54 | 34.7  | 28.14 |
| 1568 | 264.16 | 60.11 | 45.55 | 34.7  | 28.12 |
| 1570 | 264.68 | 60.16 | 45.6  | 34.72 | 28.14 |
| 1572 | 265.12 | 60.21 | 45.65 | 34.76 | 28.17 |
| 1574 | 265.53 | 60.24 | 45.67 | 34.77 | 28.17 |
| 1576 | 266.03 | 60.27 | 45.7  | 34.79 | 28.18 |
| 1578 | 266.48 | 60.31 | 45.76 | 34.82 | 28.21 |
| 1580 | 266.92 | 60.34 | 45.79 | 34.85 | 28.21 |
| 1582 | 267.37 | 60.37 | 45.82 | 34.86 | 28.22 |
| 1584 | 267.82 | 60.41 | 45.85 | 34.88 | 28.24 |
| 1586 | 268.35 | 60.44 | 45.89 | 34.9  | 28.24 |
| 1588 | 268.8  | 60.48 | 45.93 | 34.93 | 28.26 |
| 1590 | 269.23 | 60.51 | 45.96 | 34.94 | 28.26 |
| 1592 | 269.74 | 60.54 | 46    | 34.96 | 28.28 |
| 1594 | 270.17 | 60.59 | 46.03 | 34.99 | 28.29 |
| 1596 | 270.62 | 60.63 | 46.08 | 35.03 | 28.33 |
| 1598 | 271.08 | 60.69 | 46.14 | 35.09 | 28.36 |
| 1600 | 271.58 | 60.69 | 46.15 | 35.08 | 28.34 |
| 1602 | 272.04 | 60.73 | 46.18 | 35.09 | 28.33 |
| 1604 | 272.5  | 60.76 | 46.22 | 35.11 | 28.35 |
| 1606 | 272.96 | 60.8  | 46.26 | 35.14 | 28.37 |
| 1608 | 273.4  | 60.82 | 46.27 | 35.14 | 28.36 |
| 1610 | 273.92 | 60.85 | 46.33 | 35.17 | 28.38 |
| 1612 | 274.36 | 60.89 | 46.36 | 35.19 | 28.4  |
| 1614 | 274.81 | 60.94 | 46.43 | 35.24 | 28.44 |
| 1616 | 275.31 | 60.96 | 46.44 | 35.25 | 28.44 |
| 1618 | 275.71 | 60.98 | 46.44 | 35.25 | 28.42 |
| 1620 | 276.17 | 61.03 | 46.5  | 35.28 | 28.44 |
| 1622 | 276.61 | 61.07 | 46.53 | 35.3  | 28.46 |
| 1624 | 277.05 | 61.08 | 46.56 | 35.31 | 28.46 |
| 1626 | 277.59 | 61.14 | 46.61 | 35.35 | 28.48 |
| 1628 | 278.04 | 61.18 | 46.65 | 35.38 | 28.48 |
| 1630 | 278.46 | 61.22 | 46.68 | 35.41 | 28.51 |

|      |        |       |       |       |       |
|------|--------|-------|-------|-------|-------|
| 1632 | 278.89 | 61.27 | 46.73 | 35.45 | 28.52 |
| 1634 | 279.4  | 61.31 | 46.77 | 35.46 | 28.55 |
| 1636 | 279.85 | 61.34 | 46.8  | 35.49 | 28.56 |
| 1638 | 280.31 | 61.37 | 46.84 | 35.52 | 28.56 |
| 1640 | 280.76 | 61.39 | 46.86 | 35.52 | 28.56 |
| 1642 | 281.31 | 61.46 | 46.91 | 35.56 | 28.6  |
| 1644 | 281.77 | 61.49 | 46.96 | 35.59 | 28.61 |
| 1646 | 282.19 | 61.51 | 46.98 | 35.6  | 28.61 |
| 1648 | 282.65 | 61.56 | 47.03 | 35.65 | 28.64 |
| 1650 | 283.18 | 61.61 | 47.09 | 35.69 | 28.68 |
| 1652 | 283.59 | 61.61 | 47.1  | 35.68 | 28.66 |
| 1654 | 284.04 | 61.67 | 47.16 | 35.73 | 28.7  |
| 1656 | 284.45 | 61.69 | 47.16 | 35.72 | 28.68 |
| 1658 | 284.97 | 61.72 | 47.2  | 35.75 | 28.68 |
| 1660 | 285.41 | 61.73 | 47.2  | 35.74 | 28.69 |
| 1662 | 285.88 | 61.78 | 47.26 | 35.79 | 28.71 |
| 1664 | 286.44 | 61.83 | 47.31 | 35.84 | 28.75 |
| 1666 | 286.89 | 61.89 | 47.36 | 35.86 | 28.76 |
| 1668 | 287.34 | 61.92 | 47.39 | 35.88 | 28.76 |
| 1670 | 287.76 | 61.93 | 47.41 | 35.89 | 28.77 |
| 1672 | 288.23 | 61.94 | 47.43 | 35.89 | 28.77 |
| 1674 | 288.67 | 62.01 | 47.48 | 35.92 | 28.79 |
| 1676 | 289.1  | 62.03 | 47.49 | 35.94 | 28.79 |
| 1678 | 289.59 | 62.1  | 47.56 | 36    | 28.83 |
| 1680 | 290.05 | 62.12 | 47.6  | 36.03 | 28.84 |
| 1682 | 290.55 | 62.11 | 47.59 | 36.01 | 28.82 |
| 1684 | 291.03 | 62.19 | 47.66 | 36.07 | 28.87 |
| 1686 | 291.48 | 62.22 | 47.69 | 36.09 | 28.88 |
| 1688 | 291.89 | 62.21 | 47.68 | 36.07 | 28.85 |
| 1690 | 292.36 | 62.25 | 47.73 | 36.1  | 28.86 |
| 1692 | 292.81 | 62.31 | 47.79 | 36.15 | 28.89 |
| 1694 | 293.25 | 62.35 | 47.83 | 36.19 | 28.92 |
| 1696 | 293.78 | 62.38 | 47.86 | 36.21 | 28.93 |
| 1698 | 294.25 | 62.41 | 47.9  | 36.23 | 28.94 |
| 1700 | 294.7  | 62.42 | 47.91 | 36.23 | 28.91 |
| 1702 | 295.19 | 62.49 | 47.97 | 36.29 | 28.96 |
| 1704 | 295.7  | 62.52 | 48.01 | 36.31 | 28.98 |
| 1706 | 296.11 | 62.53 | 48.02 | 36.29 | 28.95 |
| 1708 | 296.56 | 62.57 | 48.07 | 36.34 | 29    |
| 1710 | 296.97 | 62.59 | 48.09 | 36.35 | 29    |
| 1712 | 297.4  | 62.63 | 48.13 | 36.37 | 29.01 |
| 1714 | 297.9  | 62.64 | 48.14 | 36.39 | 29    |
| 1716 | 298.35 | 62.7  | 48.2  | 36.42 | 29.02 |
| 1718 | 298.82 | 62.73 | 48.23 | 36.45 | 29.06 |

|      |        |       |       |       |       |
|------|--------|-------|-------|-------|-------|
| 1720 | 299.29 | 62.78 | 48.27 | 36.48 | 29.07 |
| 1722 | 299.8  | 62.8  | 48.29 | 36.5  | 29.06 |
| 1724 | 300.25 | 62.85 | 48.34 | 36.53 | 29.08 |
| 1726 | 300.7  | 62.9  | 48.4  | 36.59 | 29.13 |
| 1728 | 301.18 | 62.92 | 48.41 | 36.59 | 29.12 |
| 1730 | 301.61 | 62.95 | 48.44 | 36.61 | 29.13 |
| 1732 | 302.05 | 62.98 | 48.48 | 36.64 | 29.15 |
| 1734 | 302.5  | 63.01 | 48.51 | 36.66 | 29.16 |
| 1736 | 302.99 | 63.08 | 48.59 | 36.72 | 29.21 |
| 1738 | 303.56 | 63.14 | 48.64 | 36.76 | 29.24 |
| 1740 | 303.99 | 63.14 | 48.64 | 36.74 | 29.22 |
| 1742 | 304.41 | 63.16 | 48.66 | 36.74 | 29.22 |
| 1744 | 304.82 | 63.17 | 48.67 | 36.76 | 29.22 |
| 1746 | 305.33 | 63.21 | 48.71 | 36.77 | 29.23 |
| 1748 | 305.77 | 63.26 | 48.78 | 36.83 | 29.27 |
| 1750 | 306.19 | 63.29 | 48.81 | 36.86 | 29.31 |
| 1752 | 306.7  | 63.35 | 48.86 | 36.9  | 29.33 |
| 1754 | 307.16 | 63.39 | 48.9  | 36.93 | 29.35 |
| 1756 | 307.63 | 63.43 | 48.93 | 36.95 | 29.35 |
| 1758 | 308.04 | 63.42 | 48.93 | 36.95 | 29.32 |
| 1760 | 308.51 | 63.49 | 48.99 | 36.99 | 29.37 |
| 1762 | 308.91 | 63.49 | 48.99 | 36.98 | 29.35 |
| 1764 | 309.43 | 63.56 | 49.05 | 37.04 | 29.39 |
| 1766 | 309.83 | 63.59 | 49.08 | 37.05 | 29.38 |
| 1768 | 310.24 | 63.63 | 49.11 | 37.09 | 29.41 |
| 1770 | 310.77 | 63.68 | 49.17 | 37.13 | 29.44 |
| 1772 | 311.21 | 63.7  | 49.2  | 37.14 | 29.44 |
| 1774 | 311.63 | 63.7  | 49.19 | 37.14 | 29.42 |
| 1776 | 312.13 | 63.77 | 49.26 | 37.19 | 29.47 |
| 1778 | 312.67 | 63.82 | 49.29 | 37.23 | 29.49 |
| 1780 | 313.13 | 63.85 | 49.34 | 37.26 | 29.51 |
| 1782 | 313.56 | 63.89 | 49.37 | 37.28 | 29.52 |
| 1784 | 314.05 | 63.92 | 49.41 | 37.3  | 29.54 |
| 1786 | 314.45 | 63.93 | 49.43 | 37.3  | 29.53 |
| 1788 | 314.87 | 63.96 | 49.45 | 37.32 | 29.55 |
| 1790 | 315.29 | 64.02 | 49.5  | 37.36 | 29.58 |
| 1792 | 315.73 | 64.05 | 49.52 | 37.38 | 29.58 |
| 1794 | 316.24 | 64.07 | 49.55 | 37.4  | 29.58 |
| 1796 | 316.69 | 64.12 | 49.59 | 37.43 | 29.6  |
| 1798 | 317.14 | 64.15 | 49.64 | 37.47 | 29.62 |
| 1800 | 317.64 | 64.18 | 49.66 | 37.48 | 29.62 |
| 1802 | 318.03 | 64.22 | 49.68 | 37.5  | 29.63 |
| 1804 | 318.42 | 64.23 | 49.7  | 37.49 | 29.63 |
| 1806 | 318.86 | 64.27 | 49.74 | 37.53 | 29.65 |

|      |        |       |       |       |       |
|------|--------|-------|-------|-------|-------|
| 1808 | 319.27 | 64.3  | 49.77 | 37.54 | 29.65 |
| 1810 | 319.77 | 64.34 | 49.79 | 37.57 | 29.67 |
| 1812 | 320.26 | 64.4  | 49.86 | 37.62 | 29.7  |
| 1814 | 320.7  | 64.42 | 49.87 | 37.63 | 29.71 |
| 1816 | 321.14 | 64.43 | 49.89 | 37.65 | 29.72 |
| 1818 | 321.67 | 64.49 | 49.94 | 37.68 | 29.73 |
| 1820 | 322.12 | 64.54 | 49.99 | 37.74 | 29.77 |
| 1822 | 322.52 | 64.58 | 50.02 | 37.76 | 29.77 |
| 1824 | 322.89 | 64.59 | 50.02 | 37.75 | 29.76 |
| 1826 | 323.36 | 64.62 | 50.04 | 37.78 | 29.76 |
| 1828 | 323.82 | 64.67 | 50.1  | 37.81 | 29.79 |
| 1830 | 324.26 | 64.71 | 50.13 | 37.84 | 29.81 |
| 1832 | 324.71 | 64.75 | 50.17 | 37.87 | 29.83 |
| 1834 | 325.22 | 64.77 | 50.2  | 37.88 | 29.83 |
| 1836 | 325.66 | 64.81 | 50.23 | 37.89 | 29.84 |
| 1838 | 326.08 | 64.84 | 50.26 | 37.91 | 29.85 |
| 1840 | 326.5  | 64.88 | 50.28 | 37.94 | 29.87 |
| 1842 | 326.98 | 64.9  | 50.3  | 37.95 | 29.87 |
| 1844 | 327.39 | 64.95 | 50.36 | 37.98 | 29.88 |
| 1846 | 327.78 | 64.96 | 50.36 | 37.99 | 29.87 |
| 1848 | 328.19 | 65.01 | 50.38 | 38.02 | 29.89 |
| 1850 | 328.73 | 65.08 | 50.44 | 38.06 | 29.92 |
| 1852 | 329.18 | 65.11 | 50.47 | 38.08 | 29.93 |
| 1854 | 329.63 | 65.14 | 50.5  | 38.11 | 29.95 |
| 1856 | 330.15 | 65.18 | 50.53 | 38.13 | 29.96 |
| 1858 | 330.58 | 65.23 | 50.57 | 38.15 | 29.97 |
| 1860 | 331    | 65.26 | 50.6  | 38.18 | 29.99 |
| 1862 | 331.46 | 65.34 | 50.68 | 38.24 | 30.04 |
| 1864 | 331.83 | 65.35 | 50.68 | 38.23 | 30.02 |
| 1866 | 332.3  | 65.4  | 50.7  | 38.26 | 30.04 |
| 1868 | 332.71 | 65.45 | 50.74 | 38.31 | 30.06 |
| 1870 | 333.13 | 65.47 | 50.75 | 38.31 | 30.04 |
| 1872 | 333.59 | 65.51 | 50.78 | 38.33 | 30.07 |
| 1874 | 334.09 | 65.54 | 50.81 | 38.35 | 30.07 |
| 1876 | 334.52 | 65.59 | 50.84 | 38.37 | 30.07 |
| 1878 | 334.97 | 65.65 | 50.88 | 38.41 | 30.11 |
| 1880 | 335.39 | 65.69 | 50.92 | 38.43 | 30.11 |
| 1882 | 335.84 | 65.75 | 50.97 | 38.47 | 30.15 |
| 1884 | 336.21 | 65.75 | 50.96 | 38.47 | 30.13 |
| 1886 | 336.66 | 65.83 | 51.03 | 38.54 | 30.18 |
| 1888 | 337.17 | 65.88 | 51.07 | 38.57 | 30.2  |
| 1890 | 337.6  | 65.92 | 51.09 | 38.59 | 30.21 |
| 1892 | 338.04 | 65.97 | 51.13 | 38.61 | 30.22 |
| 1894 | 338.45 | 65.97 | 51.13 | 38.61 | 30.2  |

|      |        |       |       |       |       |
|------|--------|-------|-------|-------|-------|
| 1896 | 338.95 | 66.04 | 51.18 | 38.67 | 30.23 |
| 1898 | 339.36 | 66.06 | 51.18 | 38.65 | 30.21 |
| 1900 | 339.76 | 66.08 | 51.21 | 38.66 | 30.24 |
| 1902 | 340.16 | 66.14 | 51.25 | 38.71 | 30.25 |
| 1904 | 340.53 | 66.17 | 51.26 | 38.72 | 30.25 |
| 1906 | 340.94 | 66.21 | 51.29 | 38.75 | 30.25 |
| 1908 | 341.43 | 66.25 | 51.3  | 38.76 | 30.26 |
| 1910 | 341.87 | 66.31 | 51.35 | 38.8  | 30.29 |
| 1912 | 342.31 | 66.34 | 51.36 | 38.82 | 30.29 |
| 1914 | 342.8  | 66.39 | 51.41 | 38.86 | 30.32 |
| 1916 | 343.24 | 66.46 | 51.46 | 38.91 | 30.36 |
| 1918 | 343.62 | 66.51 | 51.5  | 38.94 | 30.37 |
| 1920 | 343.98 | 66.53 | 51.49 | 38.93 | 30.35 |
| 1922 | 344.43 | 66.57 | 51.51 | 38.94 | 30.37 |
| 1924 | 344.81 | 66.6  | 51.54 | 38.95 | 30.37 |
| 1926 | 345.26 | 66.66 | 51.6  | 39.01 | 30.41 |
| 1928 | 345.76 | 66.69 | 51.63 | 39.03 | 30.41 |
| 1930 | 346.19 | 66.72 | 51.64 | 39.03 | 30.4  |
| 1932 | 346.61 | 66.75 | 51.65 | 39.04 | 30.4  |
| 1934 | 347.06 | 66.82 | 51.7  | 39.09 | 30.44 |
| 1936 | 347.47 | 66.87 | 51.73 | 39.13 | 30.45 |
| 1938 | 347.92 | 66.91 | 51.75 | 39.16 | 30.47 |
| 1940 | 348.31 | 66.99 | 51.8  | 39.2  | 30.5  |
| 1942 | 348.63 | 67.02 | 51.79 | 39.2  | 30.48 |
| 1944 | 349.05 | 67.05 | 51.82 | 39.21 | 30.49 |
| 1946 | 349.58 | 67.13 | 51.87 | 39.27 | 30.52 |
| 1948 | 350.01 | 67.19 | 51.91 | 39.28 | 30.55 |
| 1950 | 350.43 | 67.24 | 51.94 | 39.31 | 30.55 |
| 1952 | 350.89 | 67.28 | 51.95 | 39.32 | 30.55 |
| 1954 | 351.28 | 67.32 | 51.97 | 39.33 | 30.55 |
| 1956 | 351.65 | 67.35 | 51.98 | 39.34 | 30.55 |
| 1958 | 352.06 | 67.42 | 52.01 | 39.36 | 30.58 |
| 1960 | 352.45 | 67.5  | 52.06 | 39.41 | 30.6  |
| 1962 | 352.89 | 67.57 | 52.09 | 39.44 | 30.62 |
| 1964 | 353.27 | 67.63 | 52.09 | 39.45 | 30.61 |
| 1966 | 353.7  | 67.7  | 52.12 | 39.47 | 30.62 |
| 1968 | 354.15 | 67.8  | 52.17 | 39.53 | 30.65 |
| 1970 | 354.62 | 67.87 | 52.18 | 39.55 | 30.65 |
| 1972 | 355    | 67.93 | 52.18 | 39.53 | 30.63 |
| 1974 | 355.42 | 68.04 | 52.23 | 39.59 | 30.68 |
| 1976 | 355.87 | 68.14 | 52.27 | 39.63 | 30.7  |
| 1978 | 356.22 | 68.24 | 52.3  | 39.65 | 30.71 |
| 1980 | 356.59 | 68.33 | 52.33 | 39.68 | 30.72 |
| 1982 | 356.99 | 68.42 | 52.35 | 39.7  | 30.74 |

|      |        |       |       |       |       |
|------|--------|-------|-------|-------|-------|
| 1984 | 357.41 | 68.51 | 52.37 | 39.72 | 30.75 |
| 1986 | 357.93 | 68.65 | 52.42 | 39.77 | 30.78 |
| 1988 | 358.34 | 68.74 | 52.44 | 39.79 | 30.78 |
| 1990 | 358.73 | 68.83 | 52.45 | 39.79 | 30.78 |
| 1992 | 359.13 | 68.93 | 52.47 | 39.8  | 30.79 |
| 1994 | 359.59 | 69.05 | 52.5  | 39.83 | 30.81 |
| 1996 | 359.94 | 69.17 | 52.52 | 39.85 | 30.81 |
| 1998 | 360.31 | 69.28 | 52.55 | 39.88 | 30.82 |
| 2000 | 360.68 | 69.41 | 52.57 | 39.9  | 30.84 |
| 2002 | 361.12 | 69.57 | 52.58 | 39.92 | 30.84 |
| 2004 | 361.57 | 69.72 | 52.62 | 39.97 | 30.87 |
| 2006 | 361.97 | 69.83 | 52.63 | 39.98 | 30.87 |
| 2008 | 362.44 | 69.95 | 52.64 | 39.99 | 30.86 |
| 2010 | 362.83 | 70.1  | 52.66 | 40.02 | 30.87 |
| 2012 | 363.21 | 70.23 | 52.68 | 40.03 | 30.88 |
| 2014 | 363.57 | 70.38 | 52.71 | 40.07 | 30.9  |
| 2016 | 363.93 | 70.54 | 52.74 | 40.11 | 30.92 |
| 2018 | 364.37 | 70.7  | 52.76 | 40.13 | 30.93 |
| 2020 | 364.73 | 70.83 | 52.79 | 40.14 | 30.93 |
| 2022 | 365.15 | 70.98 | 52.81 | 40.17 | 30.96 |
| 2024 | 365.66 | 71.14 | 52.84 | 40.2  | 30.99 |
| 2026 | 366.05 | 71.31 | 52.87 | 40.22 | 31    |
| 2028 | 366.46 | 71.48 | 52.9  | 40.28 | 31.03 |
| 2030 | 366.84 | 71.62 | 52.92 | 40.28 | 31.02 |
| 2032 | 367.23 | 71.8  | 52.95 | 40.32 | 31.05 |
| 2034 | 367.63 | 71.97 | 52.98 | 40.34 | 31.07 |
| 2036 | 367.95 | 72.1  | 52.98 | 40.33 | 31.05 |
| 2038 | 368.3  | 72.24 | 52.97 | 40.35 | 31.05 |
| 2040 | 368.68 | 72.4  | 52.99 | 40.37 | 31.06 |
| 2042 | 369.19 | 72.61 | 53.04 | 40.41 | 31.08 |
| 2044 | 369.65 | 72.79 | 53.08 | 40.46 | 31.13 |
| 2046 | 370.05 | 72.96 | 53.11 | 40.49 | 31.15 |
| 2048 | 370.42 | 73.09 | 53.09 | 40.48 | 31.11 |
| 2050 | 370.88 | 73.27 | 53.12 | 40.51 | 31.14 |
| 2052 | 371.24 | 73.49 | 53.16 | 40.55 | 31.16 |
| 2054 | 371.58 | 73.66 | 53.16 | 40.57 | 31.16 |
| 2056 | 371.97 | 73.81 | 53.16 | 40.58 | 31.15 |
| 2058 | 372.37 | 74.06 | 53.23 | 40.65 | 31.21 |
| 2060 | 372.77 | 74.23 | 53.25 | 40.67 | 31.22 |
| 2062 | 373.18 | 74.41 | 53.28 | 40.7  | 31.23 |
| 2064 | 373.56 | 74.57 | 53.28 | 40.71 | 31.23 |
| 2066 | 374.03 | 74.79 | 53.31 | 40.73 | 31.25 |
| 2068 | 374.42 | 74.98 | 53.33 | 40.76 | 31.27 |
| 2070 | 374.78 | 75.16 | 53.36 | 40.78 | 31.29 |

|      |        |       |       |       |       |
|------|--------|-------|-------|-------|-------|
| 2072 | 375.13 | 75.34 | 53.37 | 40.79 | 31.3  |
| 2074 | 375.52 | 75.57 | 53.39 | 40.82 | 31.32 |
| 2076 | 375.86 | 75.75 | 53.41 | 40.84 | 31.32 |
| 2078 | 376.22 | 75.94 | 53.42 | 40.85 | 31.32 |
| 2080 | 376.68 | 76.13 | 53.44 | 40.88 | 31.34 |
| 2082 | 377.09 | 76.36 | 53.46 | 40.91 | 31.36 |
| 2084 | 377.49 | 76.55 | 53.49 | 40.93 | 31.37 |
| 2086 | 377.87 | 76.75 | 53.51 | 40.97 | 31.38 |
| 2088 | 378.23 | 76.94 | 53.52 | 40.99 | 31.39 |
| 2090 | 378.62 | 77.18 | 53.54 | 41.01 | 31.4  |
| 2092 | 378.94 | 77.38 | 53.56 | 41.04 | 31.42 |
| 2094 | 379.26 | 77.59 | 53.57 | 41.06 | 31.44 |
| 2096 | 379.6  | 77.76 | 53.58 | 41.06 | 31.43 |
| 2098 | 380.07 | 77.96 | 53.61 | 41.09 | 31.45 |
| 2100 | 380.48 | 78.21 | 53.63 | 41.12 | 31.47 |
| 2102 | 380.87 | 78.4  | 53.63 | 41.14 | 31.47 |
| 2104 | 381.29 | 78.62 | 53.66 | 41.16 | 31.49 |
| 2106 | 381.74 | 78.88 | 53.7  | 41.2  | 31.52 |
| 2108 | 382.09 | 79.09 | 53.71 | 41.22 | 31.52 |
| 2110 | 382.47 | 79.33 | 53.76 | 41.26 | 31.57 |
| 2112 | 382.84 | 79.54 | 53.79 | 41.28 | 31.57 |
| 2114 | 383.15 | 79.74 | 53.76 | 41.27 | 31.55 |
| 2116 | 383.5  | 79.96 | 53.78 | 41.29 | 31.55 |
| 2118 | 383.86 | 80.16 | 53.78 | 41.29 | 31.56 |
| 2120 | 384.27 | 80.4  | 53.81 | 41.33 | 31.59 |
| 2122 | 384.71 | 80.64 | 53.8  | 41.32 | 31.58 |
| 2124 | 385.06 | 80.83 | 53.8  | 41.33 | 31.55 |
| 2126 | 385.45 | 81.09 | 53.85 | 41.38 | 31.61 |
| 2128 | 385.77 | 81.3  | 53.86 | 41.39 | 31.61 |
| 2130 | 386.19 | 81.54 | 53.9  | 41.43 | 31.64 |
| 2132 | 386.48 | 81.78 | 53.91 | 41.43 | 31.64 |
| 2134 | 386.82 | 82.03 | 53.93 | 41.47 | 31.66 |
| 2136 | 387.23 | 82.25 | 53.93 | 41.49 | 31.67 |
| 2138 | 387.64 | 82.54 | 53.97 | 41.52 | 31.68 |
| 2140 | 388.04 | 82.78 | 54    | 41.56 | 31.69 |
| 2142 | 388.42 | 83.01 | 54.01 | 41.58 | 31.71 |
| 2144 | 388.77 | 83.24 | 54.03 | 41.59 | 31.71 |
| 2146 | 389.16 | 83.51 | 54.05 | 41.61 | 31.73 |
| 2148 | 389.46 | 83.74 | 54.05 | 41.64 | 31.73 |
| 2150 | 389.78 | 83.99 | 54.08 | 41.67 | 31.75 |
| 2152 | 390.15 | 84.25 | 54.12 | 41.71 | 31.78 |
| 2154 | 390.59 | 84.53 | 54.13 | 41.72 | 31.79 |
| 2156 | 391    | 84.79 | 54.18 | 41.76 | 31.81 |
| 2158 | 391.4  | 85.06 | 54.22 | 41.81 | 31.86 |

|      |        |       |       |       |       |
|------|--------|-------|-------|-------|-------|
| 2160 | 391.81 | 85.29 | 54.23 | 41.83 | 31.87 |
| 2162 | 392.14 | 85.55 | 54.21 | 41.81 | 31.84 |
| 2164 | 392.45 | 85.78 | 54.22 | 41.81 | 31.85 |
| 2166 | 392.76 | 86.04 | 54.26 | 41.86 | 31.88 |
| 2168 | 393.12 | 86.3  | 54.28 | 41.88 | 31.89 |
| 2170 | 393.47 | 86.61 | 54.32 | 41.92 | 31.92 |
| 2172 | 393.82 | 86.85 | 54.33 | 41.93 | 31.93 |
| 2174 | 394.22 | 87.11 | 54.35 | 41.96 | 31.95 |
| 2176 | 394.62 | 87.35 | 54.36 | 41.96 | 31.95 |
| 2178 | 395.07 | 87.59 | 54.37 | 41.98 | 31.97 |
| 2180 | 395.41 | 87.87 | 54.36 | 41.98 | 31.94 |
| 2182 | 395.75 | 88.12 | 54.39 | 42.01 | 31.97 |
| 2184 | 396.09 | 88.37 | 54.43 | 42.04 | 31.98 |
| 2186 | 396.45 | 88.64 | 54.41 | 42.03 | 31.97 |
| 2188 | 396.78 | 88.95 | 54.47 | 42.08 | 32.02 |
| 2190 | 397.11 | 89.22 | 54.5  | 42.11 | 32.04 |
| 2192 | 397.5  | 89.44 | 54.47 | 42.1  | 32.01 |
| 2194 | 397.9  | 89.73 | 54.48 | 42.11 | 32.02 |
| 2196 | 398.3  | 89.99 | 54.5  | 42.13 | 32.04 |
| 2198 | 398.69 | 90.25 | 54.51 | 42.15 | 32.05 |
| 2200 | 399.05 | 90.52 | 54.53 | 42.18 | 32.07 |
| 2202 | 399.5  | 90.87 | 54.57 | 42.22 | 32.09 |
| 2204 | 399.82 | 91.14 | 54.6  | 42.26 | 32.12 |
| 2206 | 400.1  | 91.39 | 54.6  | 42.27 | 32.12 |
| 2208 | 400.44 | 91.66 | 54.61 | 42.28 | 32.11 |
| 2210 | 400.8  | 91.96 | 54.63 | 42.3  | 32.12 |
| 2212 | 401.19 | 92.22 | 54.64 | 42.31 | 32.12 |
| 2214 | 401.59 | 92.5  | 54.67 | 42.33 | 32.13 |
| 2216 | 402.03 | 92.78 | 54.69 | 42.35 | 32.15 |
| 2218 | 402.42 | 93.06 | 54.72 | 42.37 | 32.18 |
| 2220 | 402.75 | 93.36 | 54.72 | 42.38 | 32.18 |
| 2222 | 403.09 | 93.64 | 54.76 | 42.42 | 32.2  |
| 2224 | 403.45 | 93.96 | 54.81 | 42.48 | 32.25 |
| 2226 | 403.81 | 94.22 | 54.82 | 42.47 | 32.25 |
| 2228 | 404.14 | 94.55 | 54.84 | 42.49 | 32.26 |
| 2230 | 404.5  | 94.86 | 54.88 | 42.55 | 32.3  |
| 2232 | 405.01 | 95.18 | 54.93 | 42.59 | 32.34 |
| 2234 | 405.4  | 95.5  | 54.94 | 42.62 | 32.34 |
| 2236 | 405.74 | 95.74 | 54.92 | 42.61 | 32.32 |
| 2238 | 406.09 | 96.01 | 54.93 | 42.61 | 32.31 |
| 2240 | 406.45 | 96.31 | 54.96 | 42.65 | 32.35 |
| 2242 | 406.8  | 96.64 | 54.97 | 42.67 | 32.35 |
| 2244 | 407.12 | 96.95 | 54.99 | 42.7  | 32.36 |
| 2246 | 407.44 | 97.26 | 55.04 | 42.74 | 32.39 |



|      |        |        |       |       |       |
|------|--------|--------|-------|-------|-------|
| 2248 | 407.78 | 97.55  | 55.05 | 42.73 | 32.38 |
| 2250 | 408.24 | 97.83  | 55.08 | 42.76 | 32.41 |
| 2252 | 408.63 | 98.16  | 55.1  | 42.78 | 32.43 |
| 2254 | 409.02 | 98.45  | 55.11 | 42.8  | 32.43 |
| 2256 | 409.46 | 98.73  | 55.11 | 42.8  | 32.42 |
| 2258 | 409.79 | 99.05  | 55.12 | 42.81 | 32.41 |
| 2260 | 410.17 | 99.39  | 55.17 | 42.86 | 32.46 |
| 2262 | 410.5  | 99.68  | 55.2  | 42.88 | 32.48 |
| 2264 | 410.81 | 99.98  | 55.22 | 42.9  | 32.5  |
| 2266 | 411.16 | 100.33 | 55.23 | 42.93 | 32.49 |
| 2268 | 411.52 | 100.62 | 55.25 | 42.95 | 32.5  |
| 2270 | 411.93 | 100.92 | 55.26 | 42.95 | 32.5  |
| 2272 | 412.3  | 101.19 | 55.26 | 42.95 | 32.49 |
| 2274 | 412.76 | 101.55 | 55.28 | 43    | 32.52 |
| 2276 | 413.17 | 101.9  | 55.34 | 43.04 | 32.56 |
| 2278 | 413.51 | 102.19 | 55.36 | 43.05 | 32.56 |
| 2280 | 413.89 | 102.51 | 55.37 | 43.06 | 32.57 |
| 2282 | 414.21 | 102.87 | 55.41 | 43.09 | 32.59 |
| 2284 | 414.53 | 103.17 | 55.43 | 43.11 | 32.61 |
| 2286 | 414.86 | 103.49 | 55.45 | 43.13 | 32.62 |
| 2288 | 415.23 | 103.8  | 55.47 | 43.15 | 32.63 |
| 2290 | 415.69 | 104.11 | 55.49 | 43.18 | 32.64 |
| 2292 | 416.08 | 104.47 | 55.51 | 43.2  | 32.66 |
| 2294 | 416.47 | 104.79 | 55.53 | 43.22 | 32.67 |
| 2296 | 416.83 | 105.11 | 55.55 | 43.24 | 32.68 |
| 2298 | 417.23 | 105.49 | 55.58 | 43.26 | 32.69 |
| 2300 | 417.53 | 105.82 | 55.6  | 43.3  | 32.7  |
| 2302 | 417.83 | 106.14 | 55.62 | 43.32 | 32.71 |
| 2304 | 418.17 | 106.45 | 55.65 | 43.34 | 32.72 |
| 2306 | 418.6  | 106.83 | 55.67 | 43.36 | 32.74 |
| 2308 | 418.97 | 107.14 | 55.69 | 43.37 | 32.74 |
| 2310 | 419.39 | 107.47 | 55.71 | 43.4  | 32.76 |
| 2312 | 419.77 | 107.79 | 55.74 | 43.43 | 32.77 |
| 2314 | 420.22 | 108.15 | 55.81 | 43.49 | 32.82 |
| 2316 | 420.55 | 108.55 | 55.85 | 43.52 | 32.86 |
| 2318 | 420.84 | 108.86 | 55.86 | 43.53 | 32.86 |
| 2320 | 421.13 | 109.19 | 55.88 | 43.56 | 32.89 |
| 2322 | 421.5  | 109.56 | 55.9  | 43.57 | 32.9  |
| 2324 | 421.9  | 109.9  | 55.94 | 43.61 | 32.91 |
| 2326 | 422.33 | 110.24 | 55.96 | 43.64 | 32.92 |
| 2328 | 422.76 | 110.58 | 55.99 | 43.66 | 32.94 |
| 2330 | 423.14 | 110.9  | 56    | 43.67 | 32.94 |
| 2332 | 423.59 | 111.29 | 56.04 | 43.7  | 32.98 |
| 2334 | 423.93 | 111.63 | 56.05 | 43.72 | 32.97 |

|      |        |        |       |       |       |
|------|--------|--------|-------|-------|-------|
| 2336 | 424.27 | 111.96 | 56.08 | 43.74 | 33    |
| 2338 | 424.62 | 112.29 | 56.12 | 43.75 | 33    |
| 2340 | 424.94 | 112.65 | 56.13 | 43.78 | 33.01 |
| 2342 | 425.27 | 113    | 56.16 | 43.82 | 33.04 |
| 2344 | 425.77 | 113.35 | 56.18 | 43.84 | 33.05 |
| 2346 | 426.2  | 113.76 | 56.21 | 43.86 | 33.07 |
| 2348 | 426.63 | 114.09 | 56.23 | 43.89 | 33.08 |
| 2350 | 427.03 | 114.44 | 56.26 | 43.91 | 33.09 |
| 2352 | 427.41 | 114.79 | 56.28 | 43.94 | 33.1  |
| 2354 | 427.85 | 115.15 | 56.33 | 43.98 | 33.14 |
| 2356 | 428.18 | 115.56 | 56.36 | 44    | 33.16 |
| 2358 | 428.49 | 115.9  | 56.38 | 44.02 | 33.16 |
| 2360 | 428.82 | 116.24 | 56.4  | 44.03 | 33.17 |
| 2362 | 429.26 | 116.65 | 56.41 | 44.06 | 33.18 |
| 2364 | 429.68 | 116.95 | 56.45 | 44.1  | 33.19 |
| 2366 | 430.12 | 117.39 | 56.5  | 44.14 | 33.23 |
| 2368 | 430.54 | 117.75 | 56.52 | 44.18 | 33.25 |
| 2370 | 430.9  | 118.06 | 56.51 | 44.15 | 33.22 |
| 2372 | 431.37 | 118.52 | 56.58 | 44.23 | 33.27 |
| 2374 | 431.65 | 118.84 | 56.56 | 44.21 | 33.24 |
| 2376 | 431.97 | 119.2  | 56.59 | 44.23 | 33.26 |
| 2378 | 432.33 | 119.61 | 56.61 | 44.24 | 33.27 |
| 2380 | 432.69 | 119.96 | 56.63 | 44.25 | 33.28 |
| 2382 | 433.11 | 120.33 | 56.66 | 44.29 | 33.3  |
| 2384 | 433.57 | 120.71 | 56.71 | 44.33 | 33.33 |
| 2386 | 434.05 | 121.04 | 56.71 | 44.33 | 33.32 |
| 2388 | 434.49 | 121.49 | 56.75 | 44.37 | 33.35 |
| 2390 | 434.87 | 121.83 | 56.75 | 44.38 | 33.34 |
| 2392 | 435.23 | 122.2  | 56.79 | 44.41 | 33.37 |
| 2394 | 435.62 | 122.61 | 56.8  | 44.41 | 33.36 |
| 2396 | 435.96 | 122.99 | 56.84 | 44.44 | 33.39 |
| 2398 | 436.3  | 123.37 | 56.88 | 44.49 | 33.42 |
| 2400 | 436.72 | 123.75 | 56.9  | 44.5  | 33.42 |
| 2402 | 437.15 | 124.18 | 56.93 | 44.54 | 33.45 |
| 2404 | 437.63 | 124.58 | 56.97 | 44.58 | 33.47 |
| 2406 | 438.09 | 124.96 | 57    | 44.6  | 33.49 |
| 2408 | 438.46 | 125.29 | 56.99 | 44.59 | 33.47 |
| 2410 | 438.89 | 125.65 | 57    | 44.61 | 33.47 |
| 2412 | 439.25 | 126.08 | 57.04 | 44.64 | 33.49 |
| 2414 | 439.61 | 126.47 | 57.07 | 44.67 | 33.52 |
| 2416 | 439.95 | 126.86 | 57.12 | 44.7  | 33.56 |
| 2418 | 440.38 | 127.31 | 57.15 | 44.73 | 33.58 |
| 2420 | 440.77 | 127.7  | 57.17 | 44.76 | 33.6  |
| 2422 | 441.22 | 128.07 | 57.2  | 44.78 | 33.61 |

|      |        |        |       |       |       |
|------|--------|--------|-------|-------|-------|
| 2424 | 441.66 | 128.45 | 57.22 | 44.8  | 33.62 |
| 2426 | 442.16 | 128.83 | 57.24 | 44.82 | 33.63 |
| 2428 | 442.56 | 129.28 | 57.27 | 44.84 | 33.65 |
| 2430 | 442.93 | 129.67 | 57.3  | 44.86 | 33.65 |
| 2432 | 443.25 | 130.03 | 57.29 | 44.85 | 33.63 |
| 2434 | 443.63 | 130.5  | 57.34 | 44.91 | 33.67 |
| 2436 | 443.89 | 130.84 | 57.34 | 44.9  | 33.65 |
| 2438 | 444.17 | 131.24 | 57.37 | 44.93 | 33.67 |
| 2440 | 444.45 | 131.63 | 57.41 | 44.97 | 33.7  |
| 2442 | 444.69 | 132.02 | 57.44 | 44.99 | 33.71 |
| 2444 | 444.94 | 132.47 | 57.47 | 45    | 33.72 |
| 2446 | 445.11 | 132.83 | 57.46 | 44.99 | 33.71 |
| 2448 | 445.29 | 133.22 | 57.48 | 45    | 33.71 |
| 2450 | 445.45 | 133.56 | 57.48 | 45    | 33.7  |
| 2452 | 445.59 | 134.02 | 57.5  | 45.01 | 33.7  |
| 2454 | 445.71 | 134.4  | 57.53 | 45.05 | 33.73 |
| 2456 | 445.82 | 134.8  | 57.58 | 45.08 | 33.75 |
| 2458 | 445.93 | 135.27 | 57.59 | 45.09 | 33.76 |
| 2460 | 445.98 | 135.65 | 57.62 | 45.12 | 33.76 |
| 2462 | 446.04 | 136.05 | 57.64 | 45.13 | 33.76 |
| 2464 | 446.09 | 136.44 | 57.66 | 45.15 | 33.78 |
| 2466 | 446.07 | 136.87 | 57.66 | 45.15 | 33.78 |
| 2468 | 446.06 | 137.26 | 57.7  | 45.18 | 33.79 |
| 2470 | 446.04 | 137.66 | 57.71 | 45.18 | 33.79 |
| 2472 | 445.99 | 138.03 | 57.71 | 45.19 | 33.78 |
| 2474 | 445.95 | 138.42 | 57.75 | 45.23 | 33.81 |
| 2476 | 445.89 | 138.91 | 57.8  | 45.28 | 33.85 |
| 2478 | 445.79 | 139.27 | 57.81 | 45.29 | 33.84 |
| 2480 | 445.68 | 139.66 | 57.83 | 45.31 | 33.85 |
| 2482 | 445.55 | 140.05 | 57.86 | 45.34 | 33.88 |
| 2484 | 445.41 | 140.51 | 57.88 | 45.36 | 33.88 |
| 2486 | 445.25 | 140.88 | 57.89 | 45.37 | 33.89 |
| 2488 | 445.04 | 141.22 | 57.87 | 45.36 | 33.87 |
| 2490 | 444.84 | 141.68 | 57.89 | 45.38 | 33.88 |
| 2492 | 444.61 | 142.02 | 57.89 | 45.38 | 33.87 |
| 2494 | 444.43 | 142.43 | 57.94 | 45.42 | 33.91 |
| 2496 | 444.19 | 142.78 | 57.95 | 45.44 | 33.91 |
| 2498 | 443.89 | 143.13 | 57.96 | 45.44 | 33.91 |
| 2500 | 443.62 | 143.52 | 57.93 | 45.42 | 33.88 |
| 2502 | 443.36 | 143.86 | 57.94 | 45.45 | 33.9  |
| 2504 | 443.05 | 144.18 | 57.93 | 45.44 | 33.88 |
| 2506 | 442.69 | 144.52 | 57.93 | 45.45 | 33.88 |
| 2508 | 442.4  | 144.93 | 57.95 | 45.48 | 33.89 |
| 2510 | 442.08 | 145.25 | 57.94 | 45.49 | 33.9  |

|      |        |        |       |       |       |
|------|--------|--------|-------|-------|-------|
| 2512 | 441.75 | 145.57 | 57.93 | 45.5  | 33.88 |
| 2514 | 441.36 | 145.97 | 57.96 | 45.54 | 33.91 |
| 2516 | 441.03 | 146.3  | 57.95 | 45.54 | 33.91 |
| 2518 | 440.67 | 146.62 | 57.95 | 45.56 | 33.9  |
| 2520 | 440.29 | 146.91 | 57.93 | 45.55 | 33.9  |
| 2522 | 439.92 | 147.26 | 57.98 | 45.61 | 33.95 |
| 2524 | 439.54 | 147.62 | 57.98 | 45.64 | 33.96 |
| 2526 | 439.14 | 147.9  | 57.97 | 45.63 | 33.94 |
| 2528 | 438.75 | 148.2  | 57.97 | 45.66 | 33.96 |
| 2530 | 438.28 | 148.49 | 57.97 | 45.68 | 33.97 |
| 2532 | 437.88 | 148.82 | 57.96 | 45.68 | 33.97 |
| 2534 | 437.46 | 149.1  | 57.95 | 45.7  | 33.97 |
| 2536 | 437.03 | 149.36 | 57.94 | 45.71 | 33.96 |
| 2538 | 436.51 | 149.66 | 57.91 | 45.7  | 33.95 |
| 2540 | 436.07 | 149.91 | 57.9  | 45.69 | 33.94 |
| 2542 | 435.64 | 150.19 | 57.9  | 45.7  | 33.96 |
| 2544 | 435.17 | 150.42 | 57.89 | 45.71 | 33.96 |
| 2546 | 434.65 | 150.66 | 57.87 | 45.73 | 33.96 |
| 2548 | 434.19 | 150.97 | 57.87 | 45.76 | 33.98 |
| 2550 | 433.73 | 151.2  | 57.85 | 45.76 | 33.99 |
| 2552 | 433.28 | 151.45 | 57.86 | 45.78 | 34.01 |
| 2554 | 432.72 | 151.68 | 57.85 | 45.79 | 34.01 |
| 2556 | 432.23 | 151.92 | 57.81 | 45.79 | 33.99 |
| 2558 | 431.76 | 152.17 | 57.81 | 45.8  | 34.02 |
| 2560 | 431.29 | 152.39 | 57.8  | 45.82 | 34.02 |
| 2562 | 430.79 | 152.6  | 57.78 | 45.82 | 34    |
| 2564 | 430.23 | 152.86 | 57.78 | 45.84 | 34.02 |
| 2566 | 429.74 | 153.08 | 57.78 | 45.87 | 34.03 |
| 2568 | 429.24 | 153.28 | 57.76 | 45.87 | 34.04 |
| 2570 | 428.65 | 153.48 | 57.75 | 45.89 | 34.04 |
| 2572 | 428.14 | 153.71 | 57.73 | 45.89 | 34.05 |
| 2574 | 427.62 | 153.9  | 57.72 | 45.9  | 34.05 |
| 2576 | 427.1  | 154.1  | 57.7  | 45.9  | 34.07 |
| 2578 | 426.6  | 154.29 | 57.69 | 45.91 | 34.08 |
| 2580 | 425.98 | 154.48 | 57.66 | 45.91 | 34.07 |
| 2582 | 425.45 | 154.66 | 57.65 | 45.92 | 34.07 |
| 2584 | 424.91 | 154.82 | 57.62 | 45.92 | 34.06 |
| 2586 | 424.39 | 155.01 | 57.61 | 45.94 | 34.08 |
| 2588 | 423.76 | 155.2  | 57.6  | 45.94 | 34.08 |
| 2590 | 423.24 | 155.36 | 57.58 | 45.95 | 34.09 |
| 2592 | 422.71 | 155.52 | 57.57 | 45.96 | 34.09 |
| 2594 | 422.08 | 155.67 | 57.56 | 45.98 | 34.1  |
| 2596 | 421.55 | 155.86 | 57.54 | 45.98 | 34.1  |
| 2598 | 421.01 | 156    | 57.53 | 45.98 | 34.1  |

|      |        |        |       |       |       |
|------|--------|--------|-------|-------|-------|
| 2600 | 420.46 | 156.15 | 57.51 | 45.99 | 34.11 |
| 2602 | 419.92 | 156.3  | 57.5  | 46    | 34.11 |
| 2604 | 419.28 | 156.46 | 57.48 | 46    | 34.11 |
| 2606 | 418.72 | 156.6  | 57.46 | 46    | 34.11 |
| 2608 | 418.17 | 156.74 | 57.44 | 46    | 34.12 |
| 2610 | 417.62 | 156.87 | 57.43 | 46    | 34.12 |
| 2612 | 416.97 | 157.02 | 57.41 | 46.01 | 34.12 |
| 2614 | 416.4  | 157.14 | 57.38 | 45.99 | 34.11 |
| 2616 | 415.86 | 157.28 | 57.38 | 46.02 | 34.13 |
| 2618 | 415.22 | 157.4  | 57.36 | 46.03 | 34.14 |
| 2620 | 414.66 | 157.54 | 57.34 | 46.03 | 34.14 |
| 2622 | 414.1  | 157.66 | 57.33 | 46.04 | 34.14 |
| 2624 | 413.54 | 157.78 | 57.32 | 46.05 | 34.15 |
| 2626 | 412.87 | 157.89 | 57.3  | 46.06 | 34.14 |
| 2628 | 412.32 | 158.02 | 57.29 | 46.06 | 34.14 |
| 2630 | 411.75 | 158.13 | 57.26 | 46.06 | 34.15 |
| 2632 | 411.18 | 158.23 | 57.26 | 46.06 | 34.15 |
| 2634 | 410.55 | 158.36 | 57.27 | 46.09 | 34.17 |
| 2636 | 409.99 | 158.51 | 57.28 | 46.12 | 34.2  |
| 2638 | 409.41 | 158.59 | 57.24 | 46.09 | 34.2  |
| 2640 | 408.82 | 158.67 | 57.2  | 46.08 | 34.19 |
| 2642 | 408.16 | 158.76 | 57.19 | 46.07 | 34.18 |
| 2644 | 407.59 | 158.85 | 57.18 | 46.1  | 34.19 |
| 2646 | 407.01 | 158.94 | 57.16 | 46.08 | 34.17 |
| 2648 | 406.44 | 159.02 | 57.14 | 46.07 | 34.17 |
| 2650 | 405.77 | 159.1  | 57.11 | 46.07 | 34.17 |
| 2652 | 405.22 | 159.21 | 57.1  | 46.07 | 34.18 |
| 2654 | 404.68 | 159.33 | 57.12 | 46.11 | 34.22 |
| 2656 | 404.11 | 159.41 | 57.1  | 46.11 | 34.22 |
| 2658 | 403.39 | 159.44 | 57.06 | 46.08 | 34.2  |
| 2660 | 402.81 | 159.52 | 57.03 | 46.07 | 34.19 |
| 2662 | 402.23 | 159.59 | 57.02 | 46.07 | 34.18 |
| 2664 | 401.69 | 159.7  | 57.04 | 46.1  | 34.23 |
| 2666 | 401.01 | 159.75 | 57    | 46.08 | 34.19 |
| 2668 | 400.43 | 159.8  | 56.97 | 46.08 | 34.18 |
| 2670 | 399.86 | 159.88 | 56.96 | 46.08 | 34.2  |
| 2672 | 399.3  | 159.95 | 56.95 | 46.09 | 34.2  |
| 2674 | 398.74 | 160.03 | 56.96 | 46.1  | 34.22 |
| 2676 | 398.06 | 160.09 | 56.93 | 46.09 | 34.2  |
| 2678 | 397.48 | 160.13 | 56.9  | 46.07 | 34.19 |
| 2680 | 396.84 | 160.2  | 56.9  | 46.08 | 34.21 |
| 2682 | 396.25 | 160.25 | 56.88 | 46.08 | 34.2  |
| 2684 | 395.69 | 160.32 | 56.86 | 46.08 | 34.2  |
| 2686 | 395.12 | 160.39 | 56.87 | 46.1  | 34.21 |

|      |        |        |       |       |       |
|------|--------|--------|-------|-------|-------|
| 2688 | 394.54 | 160.42 | 56.84 | 46.08 | 34.2  |
| 2690 | 393.89 | 160.51 | 56.86 | 46.1  | 34.23 |
| 2692 | 393.31 | 160.55 | 56.83 | 46.11 | 34.23 |
| 2694 | 392.72 | 160.57 | 56.8  | 46.08 | 34.21 |
| 2696 | 392.19 | 160.64 | 56.81 | 46.11 | 34.23 |
| 2698 | 391.52 | 160.7  | 56.82 | 46.11 | 34.23 |
| 2700 | 390.91 | 160.68 | 56.74 | 46.05 | 34.18 |
| 2702 | 390.33 | 160.71 | 56.72 | 46.05 | 34.18 |
| 2704 | 389.81 | 160.8  | 56.75 | 46.1  | 34.23 |
| 2706 | 389.13 | 160.81 | 56.72 | 46.07 | 34.22 |
| 2708 | 388.55 | 160.86 | 56.71 | 46.06 | 34.2  |
| 2710 | 387.96 | 160.89 | 56.71 | 46.08 | 34.23 |
| 2712 | 387.39 | 160.92 | 56.68 | 46.06 | 34.22 |
| 2714 | 386.74 | 160.95 | 56.66 | 46.05 | 34.22 |
| 2716 | 386.16 | 160.95 | 56.62 | 46.02 | 34.2  |
| 2718 | 385.63 | 161    | 56.64 | 46.05 | 34.21 |
| 2720 | 385.06 | 161.04 | 56.63 | 46.05 | 34.22 |
| 2722 | 384.37 | 161.03 | 56.58 | 46.02 | 34.19 |
| 2724 | 383.79 | 161.03 | 56.55 | 46    | 34.17 |
| 2726 | 383.26 | 161.09 | 56.57 | 46.04 | 34.21 |
| 2728 | 382.7  | 161.13 | 56.57 | 46.05 | 34.21 |
| 2730 | 382.03 | 161.13 | 56.55 | 46.03 | 34.21 |
| 2732 | 381.49 | 161.17 | 56.56 | 46.05 | 34.23 |
| 2734 | 380.93 | 161.18 | 56.54 | 46.04 | 34.23 |
| 2736 | 380.36 | 161.19 | 56.53 | 46.04 | 34.22 |
| 2738 | 379.69 | 161.19 | 56.5  | 46.01 | 34.21 |
| 2740 | 379.16 | 161.21 | 56.49 | 46.01 | 34.22 |
| 2742 | 378.6  | 161.22 | 56.48 | 46    | 34.23 |
| 2744 | 378.04 | 161.23 | 56.47 | 46    | 34.23 |
| 2746 | 377.38 | 161.23 | 56.45 | 45.99 | 34.23 |
| 2748 | 376.83 | 161.23 | 56.44 | 45.99 | 34.23 |
| 2750 | 376.27 | 161.24 | 56.42 | 45.98 | 34.22 |
| 2752 | 375.72 | 161.24 | 56.41 | 45.98 | 34.22 |
| 2754 | 375.16 | 161.25 | 56.4  | 45.98 | 34.22 |
| 2756 | 374.53 | 161.27 | 56.38 | 45.97 | 34.21 |
| 2758 | 373.97 | 161.26 | 56.38 | 45.98 | 34.22 |
| 2760 | 373.4  | 161.25 | 56.36 | 45.96 | 34.21 |
| 2762 | 372.86 | 161.24 | 56.34 | 45.95 | 34.21 |
| 2764 | 372.21 | 161.23 | 56.31 | 45.95 | 34.21 |
| 2766 | 371.66 | 161.23 | 56.31 | 45.93 | 34.2  |
| 2768 | 371.1  | 161.23 | 56.3  | 45.93 | 34.2  |
| 2770 | 370.46 | 161.22 | 56.29 | 45.93 | 34.22 |
| 2772 | 369.93 | 161.22 | 56.27 | 45.92 | 34.2  |
| 2774 | 369.39 | 161.21 | 56.26 | 45.92 | 34.21 |

|      |        |        |       |       |       |
|------|--------|--------|-------|-------|-------|
| 2776 | 368.83 | 161.2  | 56.25 | 45.91 | 34.21 |
| 2778 | 368.27 | 161.18 | 56.23 | 45.89 | 34.2  |
| 2780 | 367.68 | 161.22 | 56.26 | 45.93 | 34.24 |
| 2782 | 367.1  | 161.16 | 56.2  | 45.88 | 34.2  |
| 2784 | 366.56 | 161.14 | 56.18 | 45.88 | 34.18 |
| 2786 | 366.04 | 161.16 | 56.2  | 45.9  | 34.2  |
| 2788 | 365.36 | 161.09 | 56.14 | 45.86 | 34.18 |
| 2790 | 364.84 | 161.11 | 56.16 | 45.87 | 34.2  |
| 2792 | 364.29 | 161.08 | 56.14 | 45.85 | 34.18 |
| 2794 | 363.68 | 161.08 | 56.14 | 45.85 | 34.19 |
| 2796 | 363.13 | 161.04 | 56.1  | 45.82 | 34.16 |
| 2798 | 362.62 | 161.04 | 56.11 | 45.84 | 34.19 |
| 2800 | 362.06 | 160.99 | 56.08 | 45.81 | 34.16 |
| 2802 | 361.43 | 160.96 | 56.06 | 45.8  | 34.16 |
| 2804 | 360.89 | 160.93 | 56.04 | 45.78 | 34.14 |
| 2806 | 360.37 | 160.92 | 56.05 | 45.78 | 34.17 |
| 2808 | 359.83 | 160.88 | 56.02 | 45.76 | 34.15 |
| 2810 | 359.21 | 160.86 | 56.01 | 45.76 | 34.15 |
| 2812 | 358.68 | 160.85 | 56.01 | 45.75 | 34.15 |
| 2814 | 358.15 | 160.81 | 55.99 | 45.75 | 34.16 |
| 2816 | 357.64 | 160.78 | 55.97 | 45.74 | 34.16 |
| 2818 | 357.03 | 160.78 | 55.99 | 45.75 | 34.16 |
| 2820 | 356.51 | 160.74 | 55.96 | 45.73 | 34.15 |
| 2822 | 355.99 | 160.72 | 55.95 | 45.75 | 34.17 |
| 2824 | 355.47 | 160.68 | 55.95 | 45.74 | 34.15 |
| 2826 | 354.93 | 160.64 | 55.92 | 45.71 | 34.14 |
| 2828 | 354.33 | 160.6  | 55.92 | 45.71 | 34.15 |
| 2830 | 353.81 | 160.57 | 55.88 | 45.69 | 34.14 |
| 2832 | 353.26 | 160.51 | 55.86 | 45.67 | 34.13 |
| 2834 | 352.66 | 160.49 | 55.86 | 45.66 | 34.14 |
| 2836 | 352.15 | 160.45 | 55.85 | 45.66 | 34.15 |
| 2838 | 351.65 | 160.43 | 55.86 | 45.68 | 34.16 |
| 2840 | 351.13 | 160.39 | 55.85 | 45.66 | 34.16 |
| 2842 | 350.53 | 160.34 | 55.82 | 45.63 | 34.14 |
| 2844 | 350.02 | 160.3  | 55.82 | 45.65 | 34.15 |
| 2846 | 349.51 | 160.27 | 55.81 | 45.64 | 34.16 |
| 2848 | 349    | 160.23 | 55.8  | 45.63 | 34.16 |
| 2850 | 348.51 | 160.21 | 55.8  | 45.64 | 34.16 |
| 2852 | 347.86 | 160.1  | 55.73 | 45.58 | 34.11 |
| 2854 | 347.36 | 160.07 | 55.73 | 45.57 | 34.13 |
| 2856 | 346.86 | 160.04 | 55.72 | 45.57 | 34.11 |
| 2858 | 346.27 | 160.02 | 55.73 | 45.58 | 34.13 |
| 2860 | 345.73 | 159.95 | 55.69 | 45.54 | 34.11 |
| 2862 | 345.24 | 159.92 | 55.7  | 45.54 | 34.13 |

|      |        |        |       |       |       |
|------|--------|--------|-------|-------|-------|
| 2864 | 344.7  | 159.83 | 55.66 | 45.5  | 34.08 |
| 2866 | 344.18 | 159.77 | 55.63 | 45.48 | 34.06 |
| 2868 | 343.62 | 159.73 | 55.63 | 45.49 | 34.08 |
| 2870 | 343.14 | 159.72 | 55.65 | 45.5  | 34.1  |
| 2872 | 342.65 | 159.67 | 55.64 | 45.5  | 34.1  |
| 2874 | 342.04 | 159.59 | 55.6  | 45.47 | 34.07 |
| 2876 | 341.57 | 159.56 | 55.61 | 45.48 | 34.08 |
| 2878 | 341.08 | 159.52 | 55.61 | 45.48 | 34.09 |
| 2880 | 340.58 | 159.47 | 55.59 | 45.47 | 34.09 |
| 2882 | 340    | 159.4  | 55.58 | 45.46 | 34.08 |
| 2884 | 339.49 | 159.36 | 55.57 | 45.44 | 34.07 |
| 2886 | 338.99 | 159.3  | 55.57 | 45.44 | 34.08 |
| 2888 | 338.48 | 159.24 | 55.54 | 45.4  | 34.06 |
| 2890 | 337.98 | 159.18 | 55.52 | 45.39 | 34.05 |
| 2892 | 337.41 | 159.11 | 55.51 | 45.37 | 34.05 |
| 2894 | 336.92 | 159.06 | 55.49 | 45.36 | 34.04 |
| 2896 | 336.42 | 158.99 | 55.47 | 45.34 | 34.02 |
| 2898 | 335.85 | 158.93 | 55.45 | 45.33 | 34.02 |
| 2900 | 335.37 | 158.87 | 55.45 | 45.32 | 34.02 |
| 2902 | 334.89 | 158.82 | 55.44 | 45.32 | 34.01 |
| 2904 | 334.37 | 158.73 | 55.39 | 45.28 | 33.96 |
| 2906 | 333.8  | 158.66 | 55.39 | 45.28 | 33.98 |
| 2908 | 333.32 | 158.62 | 55.38 | 45.27 | 33.98 |
| 2910 | 332.85 | 158.56 | 55.39 | 45.27 | 33.99 |
| 2912 | 332.36 | 158.49 | 55.37 | 45.26 | 33.98 |
| 2914 | 331.81 | 158.44 | 55.37 | 45.25 | 33.98 |
| 2916 | 331.32 | 158.37 | 55.35 | 45.23 | 33.97 |
| 2918 | 330.86 | 158.32 | 55.35 | 45.23 | 33.97 |
| 2920 | 330.36 | 158.25 | 55.32 | 45.21 | 33.95 |
| 2922 | 329.78 | 158.18 | 55.31 | 45.19 | 33.95 |
| 2924 | 329.29 | 158.08 | 55.27 | 45.15 | 33.92 |
| 2926 | 328.82 | 158.03 | 55.28 | 45.16 | 33.93 |
| 2928 | 328.36 | 157.96 | 55.27 | 45.14 | 33.93 |
| 2930 | 327.89 | 157.89 | 55.25 | 45.13 | 33.92 |
| 2932 | 327.33 | 157.81 | 55.24 | 45.11 | 33.91 |
| 2934 | 326.87 | 157.77 | 55.24 | 45.14 | 33.95 |
| 2936 | 326.4  | 157.72 | 55.24 | 45.13 | 33.93 |
| 2938 | 325.85 | 157.65 | 55.22 | 45.12 | 33.93 |
| 2940 | 325.37 | 157.56 | 55.22 | 45.11 | 33.92 |
| 2942 | 324.89 | 157.47 | 55.17 | 45.05 | 33.88 |
| 2944 | 324.42 | 157.4  | 55.16 | 45.04 | 33.87 |
| 2946 | 323.86 | 157.31 | 55.13 | 45.01 | 33.84 |
| 2948 | 323.41 | 157.26 | 55.15 | 45.02 | 33.85 |
| 2950 | 322.94 | 157.19 | 55.14 | 45.01 | 33.86 |



|      |        |        |       |       |       |
|------|--------|--------|-------|-------|-------|
| 2952 | 322.46 | 157.11 | 55.13 | 44.99 | 33.85 |
| 2954 | 321.99 | 157.02 | 55.1  | 44.97 | 33.84 |
| 2956 | 321.45 | 156.93 | 55.08 | 44.95 | 33.82 |
| 2958 | 320.99 | 156.87 | 55.06 | 44.93 | 33.82 |
| 2960 | 320.52 | 156.79 | 55.05 | 44.92 | 33.81 |
| 2962 | 319.96 | 156.7  | 55.03 | 44.89 | 33.79 |
| 2964 | 319.53 | 156.64 | 55.04 | 44.9  | 33.81 |
| 2966 | 319.11 | 156.6  | 55.07 | 44.92 | 33.82 |
| 2968 | 318.66 | 156.52 | 55.04 | 44.9  | 33.81 |
| 2970 | 318.12 | 156.44 | 55.03 | 44.9  | 33.82 |
| 2972 | 317.66 | 156.35 | 55.01 | 44.89 | 33.82 |
| 2974 | 317.2  | 156.27 | 55    | 44.87 | 33.81 |
| 2976 | 316.77 | 156.23 | 55.01 | 44.87 | 33.81 |
| 2978 | 316.2  | 156.08 | 54.96 | 44.81 | 33.75 |
| 2980 | 315.74 | 156    | 54.94 | 44.78 | 33.75 |
| 2982 | 315.3  | 155.94 | 54.93 | 44.77 | 33.75 |
| 2984 | 314.85 | 155.86 | 54.91 | 44.76 | 33.74 |
| 2986 | 314.3  | 155.76 | 54.89 | 44.73 | 33.72 |
| 2988 | 313.85 | 155.68 | 54.88 | 44.72 | 33.71 |
| 2990 | 313.44 | 155.63 | 54.91 | 44.73 | 33.73 |
| 2992 | 312.99 | 155.54 | 54.87 | 44.7  | 33.71 |
| 2994 | 312.45 | 155.45 | 54.85 | 44.69 | 33.69 |
| 2996 | 311.99 | 155.36 | 54.84 | 44.67 | 33.68 |
| 2998 | 311.58 | 155.3  | 54.85 | 44.68 | 33.7  |
| 3000 | 311.12 | 155.19 | 54.82 | 44.64 | 33.67 |
| 3002 | 310.7  | 155.15 | 54.84 | 44.64 | 33.68 |
| 3004 | 310.15 | 155.02 | 54.79 | 44.6  | 33.64 |
| 3006 | 309.7  | 154.93 | 54.77 | 44.58 | 33.64 |
| 3008 | 309.27 | 154.86 | 54.77 | 44.56 | 33.63 |
| 3010 | 308.74 | 154.76 | 54.74 | 44.53 | 33.62 |
| 3012 | 308.33 | 154.69 | 54.77 | 44.56 | 33.66 |
| 3014 | 307.89 | 154.59 | 54.74 | 44.53 | 33.63 |
| 3016 | 307.44 | 154.49 | 54.71 | 44.51 | 33.61 |
| 3018 | 306.91 | 154.38 | 54.68 | 44.47 | 33.58 |
| 3020 | 306.46 | 154.27 | 54.65 | 44.44 | 33.57 |
| 3022 | 306.04 | 154.2  | 54.66 | 44.44 | 33.56 |
| 3024 | 305.62 | 154.13 | 54.65 | 44.43 | 33.57 |
| 3026 | 305.2  | 154.06 | 54.66 | 44.44 | 33.59 |
| 3028 | 304.72 | 153.98 | 54.66 | 44.45 | 33.6  |
| 3030 | 304.29 | 153.89 | 54.66 | 44.42 | 33.58 |
| 3032 | 303.88 | 153.82 | 54.66 | 44.43 | 33.6  |
| 3034 | 303.45 | 153.74 | 54.65 | 44.42 | 33.59 |
| 3036 | 302.91 | 153.59 | 54.6  | 44.37 | 33.56 |
| 3038 | 302.47 | 153.49 | 54.58 | 44.32 | 33.52 |

|      |        |        |       |       |       |
|------|--------|--------|-------|-------|-------|
| 3040 | 302.07 | 153.43 | 54.59 | 44.33 | 33.55 |
| 3042 | 301.59 | 153.36 | 54.6  | 44.34 | 33.56 |
| 3044 | 301.13 | 153.22 | 54.56 | 44.3  | 33.53 |
| 3046 | 300.67 | 153.1  | 54.51 | 44.24 | 33.48 |
| 3048 | 300.26 | 153.03 | 54.53 | 44.25 | 33.5  |
| 3050 | 299.86 | 152.97 | 54.53 | 44.24 | 33.51 |
| 3052 | 299.38 | 152.87 | 54.52 | 44.24 | 33.5  |
| 3054 | 298.96 | 152.77 | 54.51 | 44.22 | 33.48 |
| 3056 | 298.53 | 152.68 | 54.5  | 44.21 | 33.48 |
| 3058 | 298.02 | 152.57 | 54.48 | 44.18 | 33.46 |
| 3060 | 297.61 | 152.47 | 54.46 | 44.16 | 33.45 |
| 3062 | 297.21 | 152.37 | 54.45 | 44.15 | 33.43 |
| 3064 | 296.83 | 152.32 | 54.47 | 44.16 | 33.46 |
| 3066 | 296.31 | 152.22 | 54.46 | 44.14 | 33.45 |
| 3068 | 295.85 | 152.05 | 54.39 | 44.06 | 33.39 |
| 3070 | 295.47 | 151.98 | 54.41 | 44.08 | 33.41 |
| 3072 | 295.07 | 151.9  | 54.41 | 44.08 | 33.41 |
| 3074 | 294.54 | 151.75 | 54.36 | 44.01 | 33.35 |
| 3076 | 294.15 | 151.68 | 54.37 | 44.03 | 33.38 |
| 3078 | 293.77 | 151.62 | 54.38 | 44.02 | 33.38 |
| 3080 | 293.36 | 151.53 | 54.37 | 44.03 | 33.38 |
| 3082 | 292.95 | 151.43 | 54.35 | 44    | 33.36 |
| 3084 | 292.47 | 151.32 | 54.35 | 43.99 | 33.36 |
| 3086 | 292.07 | 151.22 | 54.33 | 43.95 | 33.35 |
| 3088 | 291.66 | 151.11 | 54.31 | 43.93 | 33.32 |
| 3090 | 291.19 | 151.04 | 54.32 | 43.94 | 33.33 |
| 3092 | 290.79 | 150.93 | 54.31 | 43.93 | 33.33 |
| 3094 | 290.38 | 150.83 | 54.3  | 43.91 | 33.32 |
| 3096 | 289.98 | 150.75 | 54.3  | 43.9  | 33.32 |
| 3098 | 289.51 | 150.65 | 54.28 | 43.87 | 33.3  |
| 3100 | 289.1  | 150.53 | 54.26 | 43.84 | 33.29 |
| 3102 | 288.7  | 150.43 | 54.25 | 43.83 | 33.29 |
| 3104 | 288.32 | 150.36 | 54.25 | 43.83 | 33.28 |
| 3106 | 287.84 | 150.23 | 54.23 | 43.8  | 33.26 |
| 3108 | 287.43 | 150.14 | 54.22 | 43.77 | 33.26 |
| 3110 | 287.05 | 150.05 | 54.21 | 43.77 | 33.26 |
| 3112 | 286.64 | 149.95 | 54.2  | 43.75 | 33.24 |
| 3114 | 286.18 | 149.85 | 54.19 | 43.73 | 33.23 |
| 3116 | 285.8  | 149.75 | 54.19 | 43.74 | 33.24 |
| 3118 | 285.42 | 149.66 | 54.19 | 43.72 | 33.22 |
| 3120 | 285.06 | 149.58 | 54.2  | 43.72 | 33.22 |
| 3122 | 284.64 | 149.45 | 54.17 | 43.68 | 33.22 |
| 3124 | 284.19 | 149.36 | 54.17 | 43.69 | 33.22 |
| 3126 | 283.77 | 149.24 | 54.13 | 43.65 | 33.18 |

|      |        |        |       |       |       |
|------|--------|--------|-------|-------|-------|
| 3128 | 283.37 | 149.13 | 54.12 | 43.62 | 33.17 |
| 3130 | 282.97 | 149.03 | 54.11 | 43.6  | 33.16 |
| 3132 | 282.52 | 148.91 | 54.09 | 43.59 | 33.15 |
| 3134 | 282.12 | 148.81 | 54.09 | 43.57 | 33.14 |
| 3136 | 281.74 | 148.71 | 54.07 | 43.55 | 33.13 |
| 3138 | 281.33 | 148.64 | 54.1  | 43.57 | 33.15 |
| 3140 | 280.94 | 148.53 | 54.08 | 43.54 | 33.13 |
| 3142 | 280.54 | 148.42 | 54.07 | 43.53 | 33.12 |
| 3144 | 280.16 | 148.32 | 54.07 | 43.52 | 33.12 |
| 3146 | 279.8  | 148.24 | 54.07 | 43.51 | 33.1  |
| 3148 | 279.3  | 148.08 | 54.01 | 43.45 | 33.07 |
| 3150 | 278.93 | 147.99 | 54.04 | 43.46 | 33.09 |
| 3152 | 278.52 | 147.88 | 54    | 43.42 | 33.04 |
| 3154 | 278.08 | 147.79 | 53.99 | 43.4  | 33.04 |
| 3156 | 277.69 | 147.65 | 53.97 | 43.37 | 33.03 |
| 3158 | 277.3  | 147.55 | 53.95 | 43.35 | 33.01 |
| 3160 | 276.94 | 147.46 | 53.95 | 43.33 | 33.01 |
| 3162 | 276.51 | 147.34 | 53.95 | 43.32 | 33.01 |
| 3164 | 276.14 | 147.26 | 53.95 | 43.31 | 33.01 |
| 3166 | 275.77 | 147.16 | 53.93 | 43.29 | 32.99 |
| 3168 | 275.37 | 147.05 | 53.91 | 43.26 | 32.97 |
| 3170 | 274.93 | 146.93 | 53.91 | 43.26 | 32.97 |
| 3172 | 274.56 | 146.82 | 53.89 | 43.23 | 32.96 |
| 3174 | 274.17 | 146.71 | 53.87 | 43.21 | 32.94 |
| 3176 | 273.78 | 146.59 | 53.84 | 43.16 | 32.91 |
| 3178 | 273.42 | 146.5  | 53.84 | 43.16 | 32.91 |
| 3180 | 272.99 | 146.38 | 53.85 | 43.15 | 32.91 |
| 3182 | 272.62 | 146.28 | 53.84 | 43.14 | 32.9  |
| 3184 | 272.23 | 146.17 | 53.82 | 43.1  | 32.88 |
| 3186 | 271.88 | 146.07 | 53.81 | 43.11 | 32.88 |
| 3188 | 271.44 | 145.95 | 53.8  | 43.09 | 32.86 |
| 3190 | 271.08 | 145.86 | 53.8  | 43.08 | 32.87 |
| 3192 | 270.72 | 145.75 | 53.79 | 43.07 | 32.86 |
| 3194 | 270.28 | 145.65 | 53.78 | 43.05 | 32.85 |
| 3196 | 269.91 | 145.52 | 53.76 | 43.03 | 32.84 |
| 3198 | 269.55 | 145.42 | 53.76 | 43.02 | 32.83 |
| 3200 | 269.18 | 145.32 | 53.75 | 43    | 32.82 |
| 3202 | 268.76 | 145.21 | 53.74 | 42.98 | 32.81 |
| 3204 | 268.42 | 145.11 | 53.74 | 42.98 | 32.82 |
| 3206 | 268.06 | 145.02 | 53.75 | 42.98 | 32.84 |
| 3208 | 267.7  | 144.92 | 53.76 | 42.97 | 32.83 |
| 3210 | 267.32 | 144.81 | 53.73 | 42.94 | 32.8  |
| 3212 | 266.9  | 144.68 | 53.72 | 42.93 | 32.8  |
| 3214 | 266.52 | 144.56 | 53.68 | 42.88 | 32.76 |

|      |        |        |       |       |       |
|------|--------|--------|-------|-------|-------|
| 3216 | 266.18 | 144.47 | 53.7  | 42.87 | 32.75 |
| 3218 | 265.77 | 144.39 | 53.71 | 42.88 | 32.78 |
| 3220 | 265.4  | 144.26 | 53.69 | 42.86 | 32.77 |
| 3222 | 265.01 | 144.12 | 53.64 | 42.8  | 32.72 |
| 3224 | 264.67 | 144.02 | 53.63 | 42.79 | 32.7  |
| 3226 | 264.27 | 143.91 | 53.64 | 42.79 | 32.71 |
| 3228 | 263.91 | 143.82 | 53.65 | 42.79 | 32.72 |
| 3230 | 263.54 | 143.69 | 53.61 | 42.75 | 32.69 |
| 3232 | 263.21 | 143.6  | 53.62 | 42.76 | 32.69 |
| 3234 | 262.85 | 143.49 | 53.61 | 42.74 | 32.68 |
| 3236 | 262.47 | 143.4  | 53.62 | 42.74 | 32.69 |
| 3238 | 262.12 | 143.3  | 53.63 | 42.74 | 32.7  |
| 3240 | 261.76 | 143.18 | 53.6  | 42.69 | 32.67 |
| 3242 | 261.35 | 143.06 | 53.58 | 42.67 | 32.67 |
| 3244 | 260.99 | 142.94 | 53.57 | 42.65 | 32.66 |
| 3246 | 260.6  | 142.81 | 53.53 | 42.6  | 32.61 |
| 3248 | 260.28 | 142.72 | 53.55 | 42.61 | 32.63 |
| 3250 | 259.89 | 142.6  | 53.54 | 42.6  | 32.64 |
| 3252 | 259.54 | 142.5  | 53.53 | 42.58 | 32.63 |
| 3254 | 259.18 | 142.37 | 53.5  | 42.53 | 32.57 |
| 3256 | 258.84 | 142.29 | 53.52 | 42.53 | 32.6  |
| 3258 | 258.42 | 142.15 | 53.49 | 42.5  | 32.57 |
| 3260 | 258.08 | 142.05 | 53.49 | 42.5  | 32.58 |
| 3262 | 257.72 | 141.92 | 53.45 | 42.45 | 32.54 |
| 3264 | 257.36 | 141.81 | 53.43 | 42.43 | 32.53 |
| 3266 | 256.96 | 141.71 | 53.43 | 42.41 | 32.51 |
| 3268 | 256.64 | 141.59 | 53.44 | 42.42 | 32.53 |
| 3270 | 256.31 | 141.5  | 53.44 | 42.4  | 32.53 |
| 3272 | 255.95 | 141.35 | 53.4  | 42.36 | 32.49 |
| 3274 | 255.62 | 141.26 | 53.41 | 42.36 | 32.51 |
| 3276 | 255.23 | 141.14 | 53.4  | 42.35 | 32.5  |
| 3278 | 254.9  | 141.05 | 53.4  | 42.33 | 32.51 |
| 3280 | 254.56 | 140.94 | 53.39 | 42.32 | 32.49 |
| 3282 | 254.2  | 140.8  | 53.36 | 42.27 | 32.44 |
| 3284 | 253.83 | 140.69 | 53.36 | 42.27 | 32.46 |
| 3286 | 253.49 | 140.59 | 53.36 | 42.27 | 32.46 |
| 3288 | 253.09 | 140.48 | 53.36 | 42.26 | 32.45 |
| 3290 | 252.76 | 140.38 | 53.36 | 42.24 | 32.44 |
| 3292 | 252.43 | 140.25 | 53.34 | 42.22 | 32.43 |
| 3294 | 252.1  | 140.14 | 53.33 | 42.21 | 32.41 |
| 3296 | 251.76 | 140.03 | 53.32 | 42.19 | 32.41 |
| 3298 | 251.43 | 139.92 | 53.31 | 42.18 | 32.4  |
| 3300 | 251.04 | 139.8  | 53.3  | 42.15 | 32.38 |
| 3302 | 250.72 | 139.69 | 53.29 | 42.13 | 32.38 |

|      |        |        |       |       |       |
|------|--------|--------|-------|-------|-------|
| 3304 | 250.36 | 139.57 | 53.26 | 42.1  | 32.35 |
| 3306 | 250.02 | 139.45 | 53.24 | 42.06 | 32.33 |
| 3308 | 249.64 | 139.34 | 53.25 | 42.05 | 32.33 |
| 3310 | 249.32 | 139.24 | 53.25 | 42.04 | 32.33 |
| 3312 | 248.98 | 139.13 | 53.24 | 42.03 | 32.33 |
| 3314 | 248.56 | 139    | 53.2  | 41.99 | 32.29 |
| 3316 | 248.22 | 138.84 | 53.17 | 41.94 | 32.28 |
| 3318 | 247.89 | 138.73 | 53.15 | 41.92 | 32.24 |
| 3320 | 247.57 | 138.63 | 53.14 | 41.9  | 32.23 |
| 3322 | 247.24 | 138.54 | 53.17 | 41.91 | 32.23 |
| 3324 | 246.88 | 138.41 | 53.14 | 41.88 | 32.22 |
| 3326 | 246.59 | 138.34 | 53.17 | 41.9  | 32.25 |
| 3328 | 246.25 | 138.21 | 53.13 | 41.87 | 32.23 |
| 3330 | 245.94 | 138.14 | 53.15 | 41.87 | 32.25 |
| 3332 | 245.55 | 138    | 53.13 | 41.85 | 32.23 |
| 3334 | 245.24 | 137.89 | 53.12 | 41.82 | 32.2  |
| 3336 | 244.91 | 137.76 | 53.11 | 41.79 | 32.19 |
| 3338 | 244.54 | 137.66 | 53.1  | 41.79 | 32.2  |
| 3340 | 244.19 | 137.5  | 53.08 | 41.75 | 32.15 |
| 3342 | 243.92 | 137.43 | 53.1  | 41.76 | 32.19 |
| 3344 | 243.6  | 137.32 | 53.09 | 41.75 | 32.18 |
| 3346 | 243.21 | 137.19 | 53.07 | 41.72 | 32.15 |
| 3348 | 242.87 | 137.08 | 53.05 | 41.69 | 32.14 |
| 3350 | 242.55 | 136.95 | 53.03 | 41.66 | 32.11 |
| 3352 | 242.26 | 136.87 | 53.05 | 41.67 | 32.13 |
| 3354 | 241.95 | 136.77 | 53.04 | 41.64 | 32.11 |
| 3356 | 241.57 | 136.63 | 53.02 | 41.62 | 32.11 |
| 3358 | 241.24 | 136.51 | 53.01 | 41.59 | 32.09 |
| 3360 | 240.93 | 136.41 | 53.01 | 41.59 | 32.09 |
| 3362 | 240.56 | 136.31 | 53    | 41.57 | 32.08 |
| 3364 | 240.26 | 136.18 | 52.99 | 41.55 | 32.07 |
| 3366 | 239.95 | 136.07 | 52.97 | 41.52 | 32.05 |
| 3368 | 239.58 | 135.92 | 52.93 | 41.47 | 32.02 |
| 3370 | 239.27 | 135.8  | 52.93 | 41.46 | 32.01 |
| 3372 | 238.94 | 135.72 | 52.96 | 41.49 | 32.03 |
| 3374 | 238.63 | 135.61 | 52.95 | 41.47 | 32.02 |
| 3376 | 238.33 | 135.5  | 52.94 | 41.45 | 32.01 |
| 3378 | 237.95 | 135.39 | 52.92 | 41.43 | 31.98 |
| 3380 | 237.64 | 135.26 | 52.91 | 41.4  | 31.97 |
| 3382 | 237.35 | 135.16 | 52.91 | 41.4  | 31.98 |
| 3384 | 237.03 | 135.04 | 52.9  | 41.37 | 31.96 |
| 3386 | 236.68 | 134.94 | 52.9  | 41.37 | 31.96 |
| 3388 | 236.33 | 134.76 | 52.84 | 41.3  | 31.9  |
| 3390 | 236.02 | 134.67 | 52.84 | 41.29 | 31.9  |

|      |        |        |       |       |       |
|------|--------|--------|-------|-------|-------|
| 3392 | 235.74 | 134.56 | 52.84 | 41.27 | 31.91 |
| 3394 | 235.44 | 134.46 | 52.84 | 41.26 | 31.9  |
| 3396 | 235.09 | 134.35 | 52.85 | 41.26 | 31.91 |
| 3398 | 234.79 | 134.25 | 52.84 | 41.24 | 31.9  |
| 3400 | 234.49 | 134.14 | 52.83 | 41.22 | 31.89 |
| 3402 | 234.12 | 134.01 | 52.81 | 41.19 | 31.86 |
| 3404 | 233.83 | 133.9  | 52.81 | 41.19 | 31.88 |
| 3406 | 233.53 | 133.79 | 52.8  | 41.18 | 31.86 |
| 3408 | 233.22 | 133.69 | 52.8  | 41.17 | 31.85 |
| 3410 | 232.87 | 133.58 | 52.79 | 41.15 | 31.85 |
| 3412 | 232.56 | 133.44 | 52.78 | 41.13 | 31.84 |
| 3414 | 232.27 | 133.34 | 52.76 | 41.1  | 31.82 |
| 3416 | 231.94 | 133.21 | 52.73 | 41.06 | 31.77 |
| 3418 | 231.61 | 133.12 | 52.74 | 41.07 | 31.79 |
| 3420 | 231.32 | 133.02 | 52.75 | 41.05 | 31.79 |
| 3422 | 231.06 | 132.95 | 52.79 | 41.08 | 31.85 |
| 3424 | 230.76 | 132.82 | 52.75 | 41.04 | 31.82 |
| 3426 | 230.36 | 132.65 | 52.72 | 41.01 | 31.79 |
| 3428 | 230.06 | 132.54 | 52.7  | 40.97 | 31.75 |
| 3430 | 229.76 | 132.43 | 52.69 | 40.95 | 31.74 |
| 3432 | 229.47 | 132.32 | 52.68 | 40.93 | 31.73 |
| 3434 | 229.12 | 132.17 | 52.64 | 40.9  | 31.7  |
| 3436 | 228.84 | 132.08 | 52.66 | 40.91 | 31.71 |
| 3438 | 228.56 | 131.98 | 52.67 | 40.92 | 31.72 |
| 3440 | 228.28 | 131.91 | 52.69 | 40.92 | 31.73 |
| 3442 | 227.93 | 131.78 | 52.66 | 40.88 | 31.7  |
| 3444 | 227.61 | 131.63 | 52.63 | 40.84 | 31.67 |
| 3446 | 227.33 | 131.55 | 52.64 | 40.84 | 31.68 |
| 3448 | 227.03 | 131.43 | 52.63 | 40.81 | 31.66 |
| 3450 | 226.67 | 131.28 | 52.6  | 40.78 | 31.64 |
| 3452 | 226.41 | 131.2  | 52.62 | 40.8  | 31.66 |
| 3454 | 226.11 | 131.08 | 52.59 | 40.75 | 31.63 |
| 3456 | 225.81 | 130.96 | 52.57 | 40.72 | 31.6  |
| 3458 | 225.55 | 130.88 | 52.6  | 40.74 | 31.64 |
| 3460 | 225.2  | 130.74 | 52.59 | 40.72 | 31.62 |
| 3462 | 224.91 | 130.63 | 52.56 | 40.68 | 31.58 |
| 3464 | 224.63 | 130.53 | 52.55 | 40.67 | 31.58 |
| 3466 | 224.29 | 130.43 | 52.54 | 40.66 | 31.58 |
| 3468 | 223.99 | 130.29 | 52.52 | 40.62 | 31.54 |
| 3470 | 223.72 | 130.2  | 52.54 | 40.63 | 31.56 |
| 3472 | 223.41 | 130.08 | 52.5  | 40.59 | 31.53 |
| 3474 | 223.12 | 129.99 | 52.53 | 40.61 | 31.55 |
| 3476 | 222.8  | 129.86 | 52.5  | 40.57 | 31.51 |
| 3478 | 222.53 | 129.73 | 52.49 | 40.56 | 31.51 |

|      |        |        |       |       |       |
|------|--------|--------|-------|-------|-------|
| 3480 | 222.27 | 129.65 | 52.5  | 40.56 | 31.52 |
| 3482 | 221.96 | 129.55 | 52.5  | 40.54 | 31.53 |
| 3484 | 221.65 | 129.4  | 52.46 | 40.5  | 31.5  |
| 3486 | 221.37 | 129.3  | 52.48 | 40.49 | 31.49 |
| 3488 | 221.09 | 129.2  | 52.46 | 40.48 | 31.49 |
| 3490 | 220.77 | 129.1  | 52.46 | 40.47 | 31.49 |
| 3492 | 220.47 | 128.95 | 52.44 | 40.43 | 31.45 |
| 3494 | 220.21 | 128.85 | 52.44 | 40.42 | 31.45 |
| 3496 | 219.95 | 128.76 | 52.44 | 40.43 | 31.45 |
| 3498 | 219.62 | 128.64 | 52.44 | 40.41 | 31.44 |
| 3500 | 219.31 | 128.51 | 52.39 | 40.36 | 31.4  |
| 3502 | 219.04 | 128.41 | 52.4  | 40.37 | 31.41 |
| 3504 | 218.78 | 128.32 | 52.41 | 40.36 | 31.41 |
| 3506 | 218.48 | 128.19 | 52.37 | 40.32 | 31.38 |
| 3508 | 218.19 | 128.1  | 52.39 | 40.32 | 31.39 |
| 3510 | 217.91 | 127.99 | 52.38 | 40.3  | 31.38 |
| 3512 | 217.63 | 127.86 | 52.36 | 40.26 | 31.36 |
| 3514 | 217.32 | 127.77 | 52.36 | 40.26 | 31.36 |
| 3516 | 217.06 | 127.65 | 52.35 | 40.24 | 31.36 |
| 3518 | 216.77 | 127.54 | 52.33 | 40.22 | 31.33 |
| 3520 | 216.51 | 127.43 | 52.33 | 40.21 | 31.33 |
| 3522 | 216.19 | 127.33 | 52.33 | 40.19 | 31.32 |
| 3524 | 215.92 | 127.2  | 52.31 | 40.18 | 31.32 |
| 3526 | 215.65 | 127.1  | 52.31 | 40.16 | 31.3  |
| 3528 | 215.39 | 127.01 | 52.32 | 40.18 | 31.32 |
| 3530 | 215.11 | 126.9  | 52.3  | 40.14 | 31.29 |
| 3532 | 214.79 | 126.76 | 52.27 | 40.11 | 31.26 |
| 3534 | 214.51 | 126.67 | 52.28 | 40.1  | 31.26 |
| 3536 | 214.25 | 126.56 | 52.27 | 40.08 | 31.25 |
| 3538 | 213.98 | 126.45 | 52.26 | 40.06 | 31.24 |
| 3540 | 213.65 | 126.32 | 52.25 | 40.04 | 31.24 |
| 3542 | 213.38 | 126.22 | 52.24 | 40.02 | 31.22 |
| 3544 | 213.11 | 126.11 | 52.22 | 40    | 31.2  |
| 3546 | 212.8  | 125.99 | 52.21 | 39.99 | 31.2  |
| 3548 | 212.53 | 125.87 | 52.2  | 39.97 | 31.18 |
| 3550 | 212.26 | 125.77 | 52.19 | 39.95 | 31.17 |
| 3552 | 211.99 | 125.66 | 52.18 | 39.93 | 31.17 |
| 3554 | 211.73 | 125.55 | 52.17 | 39.92 | 31.15 |
| 3556 | 211.42 | 125.43 | 52.17 | 39.91 | 31.14 |
| 3558 | 211.16 | 125.34 | 52.17 | 39.91 | 31.14 |
| 3560 | 210.93 | 125.27 | 52.19 | 39.91 | 31.16 |
| 3562 | 210.65 | 125.15 | 52.17 | 39.88 | 31.14 |
| 3564 | 210.31 | 125    | 52.14 | 39.85 | 31.11 |
| 3566 | 210.04 | 124.88 | 52.13 | 39.82 | 31.08 |

|      |        |        |       |       |       |
|------|--------|--------|-------|-------|-------|
| 3568 | 209.78 | 124.77 | 52.11 | 39.8  | 31.07 |
| 3570 | 209.45 | 124.64 | 52.07 | 39.75 | 31.04 |
| 3572 | 209.19 | 124.53 | 52.08 | 39.75 | 31.04 |
| 3574 | 208.93 | 124.42 | 52.07 | 39.73 | 31.04 |
| 3576 | 208.68 | 124.31 | 52.06 | 39.71 | 31.03 |
| 3578 | 208.42 | 124.2  | 52.06 | 39.7  | 31.02 |
| 3580 | 208.12 | 124.07 | 52.04 | 39.68 | 31.01 |
| 3582 | 207.86 | 123.97 | 52.03 | 39.66 | 30.99 |
| 3584 | 207.61 | 123.86 | 52.02 | 39.65 | 30.98 |
| 3586 | 207.32 | 123.76 | 52.01 | 39.64 | 30.98 |
| 3588 | 207.05 | 123.64 | 52    | 39.62 | 30.96 |
| 3590 | 206.79 | 123.53 | 51.99 | 39.6  | 30.95 |
| 3592 | 206.53 | 123.42 | 51.98 | 39.58 | 30.94 |
| 3594 | 206.25 | 123.32 | 51.98 | 39.58 | 30.94 |
| 3596 | 205.98 | 123.2  | 51.97 | 39.55 | 30.92 |
| 3598 | 205.69 | 123.07 | 51.94 | 39.51 | 30.91 |
| 3600 | 205.43 | 122.96 | 51.92 | 39.48 | 30.88 |
| 3602 | 205.19 | 122.86 | 51.93 | 39.48 | 30.89 |
| 3604 | 204.89 | 122.74 | 51.92 | 39.46 | 30.88 |
| 3606 | 204.63 | 122.64 | 51.9  | 39.45 | 30.87 |
| 3608 | 204.38 | 122.53 | 51.89 | 39.43 | 30.86 |
| 3610 | 204.04 | 122.4  | 51.86 | 39.38 | 30.82 |
| 3612 | 203.81 | 122.28 | 51.85 | 39.36 | 30.81 |
| 3614 | 203.57 | 122.19 | 51.86 | 39.38 | 30.83 |
| 3616 | 203.33 | 122.09 | 51.86 | 39.36 | 30.8  |
| 3618 | 203.03 | 121.98 | 51.85 | 39.34 | 30.8  |
| 3620 | 202.78 | 121.87 | 51.84 | 39.33 | 30.79 |
| 3622 | 202.53 | 121.76 | 51.82 | 39.31 | 30.79 |
| 3624 | 202.27 | 121.65 | 51.82 | 39.3  | 30.77 |
| 3626 | 202.02 | 121.55 | 51.81 | 39.28 | 30.76 |
| 3628 | 201.77 | 121.44 | 51.8  | 39.27 | 30.75 |
| 3630 | 201.47 | 121.32 | 51.79 | 39.24 | 30.74 |
| 3632 | 201.22 | 121.21 | 51.77 | 39.22 | 30.73 |
| 3634 | 200.92 | 121.1  | 51.76 | 39.2  | 30.72 |
| 3636 | 200.68 | 121    | 51.76 | 39.19 | 30.72 |
| 3638 | 200.42 | 120.88 | 51.74 | 39.17 | 30.71 |
| 3640 | 200.13 | 120.73 | 51.69 | 39.11 | 30.65 |
| 3642 | 199.87 | 120.66 | 51.71 | 39.12 | 30.67 |
| 3644 | 199.57 | 120.49 | 51.65 | 39.05 | 30.63 |
| 3646 | 199.33 | 120.4  | 51.66 | 39.06 | 30.63 |
| 3648 | 199.11 | 120.33 | 51.68 | 39.07 | 30.64 |
| 3650 | 198.86 | 120.22 | 51.67 | 39.06 | 30.63 |
| 3652 | 198.58 | 120.11 | 51.66 | 39.05 | 30.62 |
| 3654 | 198.33 | 120    | 51.65 | 39.03 | 30.61 |



|      |        |        |       |       |       |
|------|--------|--------|-------|-------|-------|
| 3656 | 198.08 | 119.89 | 51.64 | 39    | 30.61 |
| 3658 | 197.79 | 119.79 | 51.63 | 38.98 | 30.59 |
| 3660 | 197.55 | 119.66 | 51.62 | 38.97 | 30.58 |
| 3662 | 197.3  | 119.56 | 51.6  | 38.96 | 30.56 |
| 3664 | 197.05 | 119.46 | 51.6  | 38.93 | 30.55 |
| 3666 | 196.76 | 119.35 | 51.58 | 38.91 | 30.55 |
| 3668 | 196.48 | 119.18 | 51.53 | 38.84 | 30.48 |
| 3670 | 196.25 | 119.1  | 51.54 | 38.85 | 30.5  |
| 3672 | 196.03 | 119.01 | 51.54 | 38.85 | 30.5  |
| 3674 | 195.79 | 118.91 | 51.53 | 38.84 | 30.5  |
| 3676 | 195.5  | 118.78 | 51.52 | 38.82 | 30.49 |
| 3678 | 195.26 | 118.68 | 51.51 | 38.8  | 30.47 |
| 3680 | 195.01 | 118.57 | 51.49 | 38.78 | 30.45 |
| 3682 | 194.73 | 118.46 | 51.46 | 38.75 | 30.44 |
| 3684 | 194.51 | 118.35 | 51.48 | 38.75 | 30.44 |
| 3686 | 194.27 | 118.25 | 51.47 | 38.73 | 30.43 |
| 3688 | 194.03 | 118.15 | 51.46 | 38.72 | 30.43 |
| 3690 | 193.75 | 118.02 | 51.44 | 38.7  | 30.42 |
| 3692 | 193.52 | 117.92 | 51.43 | 38.68 | 30.4  |
| 3694 | 193.27 | 117.82 | 51.42 | 38.66 | 30.39 |
| 3696 | 193.02 | 117.7  | 51.4  | 38.63 | 30.37 |
| 3698 | 192.71 | 117.56 | 51.37 | 38.59 | 30.34 |
| 3700 | 192.5  | 117.48 | 51.38 | 38.59 | 30.36 |
| 3702 | 192.27 | 117.38 | 51.36 | 38.58 | 30.35 |
| 3704 | 192.03 | 117.26 | 51.35 | 38.55 | 30.33 |
| 3706 | 191.75 | 117.16 | 51.34 | 38.54 | 30.32 |
| 3708 | 191.52 | 117.05 | 51.33 | 38.53 | 30.32 |
| 3710 | 191.28 | 116.94 | 51.32 | 38.5  | 30.32 |
| 3712 | 191.05 | 116.84 | 51.31 | 38.49 | 30.3  |
| 3714 | 190.83 | 116.74 | 51.3  | 38.48 | 30.29 |
| 3716 | 190.56 | 116.63 | 51.29 | 38.47 | 30.28 |
| 3718 | 190.32 | 116.52 | 51.28 | 38.45 | 30.27 |
| 3720 | 190.09 | 116.41 | 51.27 | 38.43 | 30.26 |
| 3722 | 189.85 | 116.31 | 51.26 | 38.41 | 30.26 |
| 3724 | 189.59 | 116.21 | 51.25 | 38.41 | 30.26 |
| 3726 | 189.36 | 116.1  | 51.25 | 38.39 | 30.25 |
| 3728 | 189.12 | 115.99 | 51.22 | 38.36 | 30.23 |
| 3730 | 188.88 | 115.92 | 51.24 | 38.37 | 30.25 |
| 3732 | 188.62 | 115.76 | 51.2  | 38.32 | 30.22 |
| 3734 | 188.43 | 115.71 | 51.23 | 38.33 | 30.25 |
| 3736 | 188.2  | 115.62 | 51.23 | 38.34 | 30.25 |
| 3738 | 187.88 | 115.44 | 51.17 | 38.27 | 30.19 |
| 3740 | 187.65 | 115.34 | 51.15 | 38.24 | 30.17 |
| 3742 | 187.43 | 115.24 | 51.13 | 38.22 | 30.17 |

|      |        |        |       |       |       |
|------|--------|--------|-------|-------|-------|
| 3744 | 187.2  | 115.14 | 51.12 | 38.21 | 30.16 |
| 3746 | 186.98 | 115.04 | 51.12 | 38.2  | 30.15 |
| 3748 | 186.71 | 114.92 | 51.12 | 38.19 | 30.14 |
| 3750 | 186.46 | 114.8  | 51.08 | 38.15 | 30.11 |
| 3752 | 186.27 | 114.72 | 51.09 | 38.17 | 30.14 |
| 3754 | 185.99 | 114.62 | 51.08 | 38.14 | 30.11 |
| 3756 | 185.76 | 114.5  | 51.06 | 38.12 | 30.1  |
| 3758 | 185.56 | 114.43 | 51.07 | 38.12 | 30.12 |
| 3760 | 185.29 | 114.29 | 51.04 | 38.07 | 30.09 |
| 3762 | 185.03 | 114.17 | 51.02 | 38.05 | 30.08 |
| 3764 | 184.79 | 114.07 | 51.02 | 38.04 | 30.07 |
| 3766 | 184.58 | 113.98 | 51    | 38.03 | 30.06 |
| 3768 | 184.36 | 113.88 | 50.99 | 38.01 | 30.05 |
| 3770 | 184.13 | 113.77 | 50.98 | 37.99 | 30.05 |
| 3772 | 183.86 | 113.64 | 50.95 | 37.95 | 30.03 |
| 3774 | 183.66 | 113.56 | 50.95 | 37.96 | 30.03 |
| 3776 | 183.44 | 113.47 | 50.94 | 37.95 | 30.01 |
| 3778 | 183.18 | 113.37 | 50.94 | 37.93 | 30.01 |
| 3780 | 182.93 | 113.22 | 50.9  | 37.88 | 29.97 |
| 3782 | 182.72 | 113.13 | 50.91 | 37.9  | 29.97 |
| 3784 | 182.51 | 113.05 | 50.91 | 37.88 | 29.98 |
| 3786 | 182.26 | 112.93 | 50.89 | 37.87 | 29.96 |
| 3788 | 182.03 | 112.85 | 50.88 | 37.85 | 29.96 |
| 3790 | 181.81 | 112.74 | 50.86 | 37.83 | 29.95 |
| 3792 | 181.59 | 112.64 | 50.85 | 37.8  | 29.94 |
| 3794 | 181.33 | 112.54 | 50.84 | 37.79 | 29.93 |
| 3796 | 181.14 | 112.45 | 50.84 | 37.79 | 29.93 |
| 3798 | 180.9  | 112.34 | 50.82 | 37.76 | 29.91 |
| 3800 | 180.68 | 112.23 | 50.8  | 37.74 | 29.91 |
| 3802 | 180.45 | 112.16 | 50.82 | 37.75 | 29.92 |
| 3804 | 180.26 | 112.07 | 50.82 | 37.76 | 29.93 |
| 3806 | 180.04 | 111.97 | 50.8  | 37.73 | 29.9  |
| 3808 | 179.82 | 111.86 | 50.8  | 37.73 | 29.9  |
| 3810 | 179.56 | 111.75 | 50.79 | 37.72 | 29.89 |
| 3812 | 179.37 | 111.66 | 50.78 | 37.7  | 29.89 |
| 3814 | 179.17 | 111.59 | 50.79 | 37.7  | 29.89 |
| 3816 | 178.96 | 111.49 | 50.78 | 37.69 | 29.89 |
| 3818 | 178.74 | 111.39 | 50.77 | 37.66 | 29.88 |
| 3820 | 178.43 | 111.23 | 50.71 | 37.59 | 29.82 |
| 3822 | 178.2  | 111.11 | 50.68 | 37.56 | 29.79 |
| 3824 | 177.99 | 111.01 | 50.66 | 37.55 | 29.79 |
| 3826 | 177.74 | 110.92 | 50.65 | 37.53 | 29.78 |
| 3828 | 177.53 | 110.8  | 50.64 | 37.52 | 29.77 |
| 3830 | 177.32 | 110.7  | 50.63 | 37.5  | 29.75 |

|      |        |        |       |       |       |
|------|--------|--------|-------|-------|-------|
| 3832 | 177.12 | 110.62 | 50.64 | 37.51 | 29.77 |
| 3834 | 176.89 | 110.52 | 50.63 | 37.5  | 29.75 |
| 3836 | 176.68 | 110.42 | 50.63 | 37.5  | 29.77 |
| 3838 | 176.49 | 110.33 | 50.61 | 37.46 | 29.75 |
| 3840 | 176.27 | 110.24 | 50.61 | 37.45 | 29.74 |
| 3842 | 176    | 110.12 | 50.57 | 37.42 | 29.72 |
| 3844 | 175.79 | 110    | 50.56 | 37.41 | 29.69 |
| 3846 | 175.63 | 109.96 | 50.6  | 37.44 | 29.74 |
| 3848 | 175.43 | 109.87 | 50.59 | 37.43 | 29.74 |
| 3850 | 175.12 | 109.7  | 50.54 | 37.36 | 29.69 |
| 3852 | 174.88 | 109.58 | 50.48 | 37.31 | 29.64 |
| 3854 | 174.71 | 109.51 | 50.5  | 37.32 | 29.66 |
| 3856 | 174.49 | 109.4  | 50.48 | 37.3  | 29.64 |
| 3858 | 174.31 | 109.33 | 50.5  | 37.3  | 29.66 |
| 3860 | 174.05 | 109.21 | 50.47 | 37.28 | 29.63 |
| 3862 | 173.84 | 109.1  | 50.45 | 37.25 | 29.61 |
| 3864 | 173.63 | 109    | 50.42 | 37.23 | 29.58 |
| 3866 | 173.4  | 108.92 | 50.44 | 37.24 | 29.61 |
| 3868 | 173.18 | 108.8  | 50.41 | 37.21 | 29.58 |
| 3870 | 172.98 | 108.71 | 50.41 | 37.2  | 29.57 |
| 3872 | 172.78 | 108.61 | 50.4  | 37.19 | 29.56 |
| 3874 | 172.53 | 108.52 | 50.39 | 37.16 | 29.55 |
| 3876 | 172.3  | 108.4  | 50.36 | 37.13 | 29.53 |
| 3878 | 172.09 | 108.31 | 50.35 | 37.12 | 29.54 |
| 3880 | 171.88 | 108.21 | 50.34 | 37.1  | 29.53 |
| 3882 | 171.68 | 108.12 | 50.33 | 37.09 | 29.53 |
| 3884 | 171.49 | 108.04 | 50.35 | 37.1  | 29.54 |
| 3886 | 171.25 | 107.93 | 50.32 | 37.08 | 29.52 |
| 3888 | 171.03 | 107.82 | 50.29 | 37.04 | 29.5  |
| 3890 | 170.81 | 107.73 | 50.3  | 37.05 | 29.51 |
| 3892 | 170.65 | 107.64 | 50.3  | 37.04 | 29.5  |
| 3894 | 170.42 | 107.54 | 50.27 | 37.01 | 29.47 |
| 3896 | 170.22 | 107.45 | 50.27 | 37.01 | 29.47 |
| 3898 | 169.96 | 107.33 | 50.24 | 36.97 | 29.43 |
| 3900 | 169.77 | 107.24 | 50.23 | 36.97 | 29.43 |
| 3902 | 169.52 | 107.11 | 50.17 | 36.91 | 29.39 |
| 3904 | 169.36 | 107.06 | 50.2  | 36.93 | 29.41 |
| 3906 | 169.13 | 106.97 | 50.2  | 36.92 | 29.41 |
| 3908 | 168.92 | 106.86 | 50.18 | 36.9  | 29.4  |
| 3910 | 168.72 | 106.77 | 50.17 | 36.88 | 29.39 |
| 3912 | 168.51 | 106.67 | 50.16 | 36.86 | 29.39 |
| 3914 | 168.28 | 106.56 | 50.14 | 36.84 | 29.38 |
| 3916 | 168.1  | 106.49 | 50.14 | 36.84 | 29.38 |
| 3918 | 167.89 | 106.37 | 50.11 | 36.82 | 29.36 |

|      |        |        |       |       |       |
|------|--------|--------|-------|-------|-------|
| 3920 | 167.69 | 106.28 | 50.11 | 36.8  | 29.34 |
| 3922 | 167.49 | 106.19 | 50.09 | 36.79 | 29.34 |
| 3924 | 167.26 | 106.08 | 50.08 | 36.77 | 29.33 |
| 3926 | 167.03 | 105.96 | 50.03 | 36.72 | 29.28 |
| 3928 | 166.8  | 105.83 | 50    | 36.68 | 29.25 |
| 3930 | 166.61 | 105.78 | 50.03 | 36.7  | 29.29 |
| 3932 | 166.42 | 105.67 | 50.02 | 36.7  | 29.28 |
| 3934 | 166.18 | 105.55 | 49.96 | 36.64 | 29.22 |
| 3936 | 166    | 105.48 | 49.97 | 36.64 | 29.23 |
| 3938 | 165.77 | 105.36 | 49.96 | 36.62 | 29.21 |
| 3940 | 165.6  | 105.29 | 49.97 | 36.64 | 29.24 |
| 3942 | 165.43 | 105.22 | 49.98 | 36.63 | 29.25 |
| 3944 | 165.24 | 105.13 | 49.97 | 36.62 | 29.24 |
| 3946 | 165.05 | 105.05 | 49.96 | 36.61 | 29.24 |
| 3948 | 164.82 | 104.95 | 49.96 | 36.6  | 29.22 |
| 3950 | 164.62 | 104.84 | 49.93 | 36.58 | 29.2  |
| 3952 | 164.39 | 104.72 | 49.88 | 36.54 | 29.16 |
| 3954 | 164.24 | 104.67 | 49.92 | 36.56 | 29.19 |
| 3956 | 164.02 | 104.57 | 49.91 | 36.55 | 29.2  |
| 3958 | 163.83 | 104.48 | 49.9  | 36.54 | 29.19 |
| 3960 | 163.65 | 104.39 | 49.89 | 36.53 | 29.18 |
| 3962 | 163.43 | 104.28 | 49.87 | 36.51 | 29.17 |
| 3964 | 163.24 | 104.19 | 49.86 | 36.49 | 29.16 |
| 3966 | 163.02 | 104.09 | 49.84 | 36.46 | 29.13 |
| 3968 | 162.85 | 104.01 | 49.82 | 36.46 | 29.14 |
| 3970 | 162.66 | 103.91 | 49.82 | 36.44 | 29.13 |
| 3972 | 162.45 | 103.82 | 49.81 | 36.43 | 29.13 |
| 3974 | 162.26 | 103.73 | 49.8  | 36.42 | 29.13 |
| 3976 | 162.05 | 103.64 | 49.78 | 36.4  | 29.11 |
| 3978 | 161.8  | 103.54 | 49.77 | 36.38 | 29.1  |
| 3980 | 161.63 | 103.44 | 49.75 | 36.36 | 29.09 |
| 3982 | 161.43 | 103.34 | 49.72 | 36.33 | 29.06 |
| 3984 | 161.26 | 103.27 | 49.74 | 36.33 | 29.08 |
| 3986 | 161.04 | 103.17 | 49.73 | 36.32 | 29.08 |
| 3988 | 160.85 | 103.08 | 49.71 | 36.31 | 29.07 |
| 3990 | 160.67 | 103    | 49.7  | 36.3  | 29.06 |
| 3992 | 160.48 | 102.91 | 49.69 | 36.29 | 29.06 |
| 3994 | 160.25 | 102.8  | 49.66 | 36.27 | 29.03 |
| 3996 | 160.08 | 102.72 | 49.68 | 36.27 | 29.04 |
| 3998 | 159.88 | 102.63 | 49.65 | 36.25 | 29    |
| 4000 | 159.66 | 102.51 | 49.62 | 36.22 | 28.99 |
| 4002 | 159.48 | 102.44 | 49.64 | 36.23 | 29.02 |
| 4004 | 159.3  | 102.36 | 49.62 | 36.22 | 29    |
| 4006 | 159.12 | 102.27 | 49.61 | 36.2  | 29    |

|      |        |        |       |       |       |
|------|--------|--------|-------|-------|-------|
| 4008 | 158.92 | 102.17 | 49.59 | 36.18 | 28.97 |
| 4010 | 158.7  | 102.06 | 49.58 | 36.16 | 28.97 |
| 4012 | 158.52 | 101.98 | 49.58 | 36.15 | 28.97 |
| 4014 | 158.33 | 101.9  | 49.57 | 36.13 | 28.96 |
| 4016 | 158.14 | 101.81 | 49.55 | 36.11 | 28.95 |
| 4018 | 157.96 | 101.72 | 49.54 | 36.1  | 28.94 |
| 4020 | 157.72 | 101.59 | 49.5  | 36.07 | 28.91 |
| 4022 | 157.56 | 101.53 | 49.51 | 36.08 | 28.93 |
| 4024 | 157.37 | 101.44 | 49.5  | 36.06 | 28.92 |
| 4026 | 157.19 | 101.35 | 49.49 | 36.05 | 28.91 |
| 4028 | 156.99 | 101.26 | 49.48 | 36.05 | 28.91 |
| 4030 | 156.79 | 101.16 | 49.46 | 36.02 | 28.87 |
| 4032 | 156.61 | 101.08 | 49.46 | 36.02 | 28.89 |
| 4034 | 156.43 | 100.99 | 49.44 | 36    | 28.87 |
| 4036 | 156.22 | 100.9  | 49.43 | 36    | 28.87 |
| 4038 | 156    | 100.79 | 49.4  | 35.96 | 28.83 |
| 4040 | 155.85 | 100.73 | 49.41 | 35.96 | 28.85 |
| 4042 | 155.65 | 100.64 | 49.4  | 35.94 | 28.85 |
| 4044 | 155.45 | 100.52 | 49.36 | 35.9  | 28.81 |
| 4046 | 155.27 | 100.44 | 49.35 | 35.9  | 28.82 |
| 4048 | 155.09 | 100.35 | 49.34 | 35.88 | 28.81 |
| 4050 | 154.91 | 100.27 | 49.34 | 35.88 | 28.81 |
| 4052 | 154.71 | 100.17 | 49.31 | 35.86 | 28.79 |
| 4054 | 154.55 | 100.1  | 49.31 | 35.85 | 28.79 |
| 4056 | 154.38 | 100.02 | 49.3  | 35.84 | 28.79 |
| 4058 | 154.19 | 99.93  | 49.3  | 35.83 | 28.78 |
| 4060 | 153.98 | 99.84  | 49.28 | 35.82 | 28.78 |
| 4062 | 153.83 | 99.77  | 49.29 | 35.81 | 28.77 |
| 4064 | 153.63 | 99.67  | 49.25 | 35.79 | 28.76 |
| 4066 | 153.43 | 99.57  | 49.24 | 35.78 | 28.75 |
| 4068 | 153.25 | 99.49  | 49.24 | 35.77 | 28.74 |
| 4070 | 153.08 | 99.4   | 49.23 | 35.76 | 28.74 |
| 4072 | 152.9  | 99.32  | 49.22 | 35.75 | 28.73 |
| 4074 | 152.7  | 99.22  | 49.2  | 35.74 | 28.73 |
| 4076 | 152.52 | 99.13  | 49.19 | 35.72 | 28.72 |
| 4078 | 152.31 | 99.02  | 49.14 | 35.68 | 28.67 |
| 4080 | 152.14 | 98.95  | 49.15 | 35.69 | 28.69 |
| 4082 | 151.99 | 98.88  | 49.16 | 35.68 | 28.7  |
| 4084 | 151.76 | 98.77  | 49.13 | 35.66 | 28.67 |
| 4086 | 151.59 | 98.69  | 49.12 | 35.64 | 28.66 |
| 4088 | 151.41 | 98.6   | 49.1  | 35.61 | 28.65 |
| 4090 | 151.23 | 98.54  | 49.1  | 35.62 | 28.66 |
| 4092 | 151.05 | 98.44  | 49.08 | 35.6  | 28.65 |
| 4094 | 150.89 | 98.37  | 49.08 | 35.61 | 28.65 |

|      |        |       |       |       |       |
|------|--------|-------|-------|-------|-------|
| 4096 | 150.71 | 98.27 | 49.05 | 35.57 | 28.63 |
| 4098 | 150.52 | 98.19 | 49.06 | 35.58 | 28.64 |
| 4100 | 150.35 | 98.13 | 49.05 | 35.57 | 28.64 |
| 4102 | 150.19 | 98.03 | 49.04 | 35.55 | 28.63 |
| 4104 | 150.01 | 97.94 | 49.01 | 35.53 | 28.6  |
| 4106 | 149.85 | 97.87 | 49.01 | 35.52 | 28.62 |
| 4108 | 149.64 | 97.77 | 49    | 35.51 | 28.61 |
| 4110 | 149.47 | 97.68 | 48.98 | 35.49 | 28.6  |
| 4112 | 149.27 | 97.58 | 48.96 | 35.46 | 28.58 |
| 4114 | 149.03 | 97.46 | 48.91 | 35.41 | 28.53 |
| 4116 | 148.88 | 97.38 | 48.92 | 35.41 | 28.54 |
| 4118 | 148.76 | 97.34 | 48.93 | 35.44 | 28.57 |
| 4120 | 148.58 | 97.26 | 48.92 | 35.43 | 28.56 |
| 4122 | 148.35 | 97.14 | 48.9  | 35.4  | 28.54 |
| 4124 | 148.2  | 97.07 | 48.9  | 35.39 | 28.54 |
| 4126 | 148.03 | 96.99 | 48.89 | 35.39 | 28.53 |
| 4128 | 147.85 | 96.89 | 48.85 | 35.35 | 28.49 |
| 4130 | 147.67 | 96.79 | 48.83 | 35.34 | 28.49 |
| 4132 | 147.53 | 96.72 | 48.83 | 35.33 | 28.48 |
| 4134 | 147.32 | 96.62 | 48.8  | 35.3  | 28.46 |
| 4136 | 147.18 | 96.55 | 48.81 | 35.31 | 28.48 |
| 4138 | 146.99 | 96.45 | 48.77 | 35.28 | 28.45 |
| 4140 | 146.79 | 96.34 | 48.76 | 35.26 | 28.44 |
| 4142 | 146.62 | 96.26 | 48.74 | 35.24 | 28.43 |
| 4144 | 146.45 | 96.18 | 48.73 | 35.23 | 28.42 |
| 4146 | 146.26 | 96.09 | 48.71 | 35.22 | 28.42 |
| 4148 | 146.09 | 96    | 48.7  | 35.21 | 28.41 |
| 4150 | 145.92 | 95.94 | 48.69 | 35.2  | 28.4  |
| 4152 | 145.77 | 95.86 | 48.69 | 35.2  | 28.41 |
| 4154 | 145.59 | 95.8  | 48.7  | 35.19 | 28.42 |
| 4156 | 145.41 | 95.7  | 48.68 | 35.17 | 28.4  |
| 4158 | 145.25 | 95.63 | 48.67 | 35.16 | 28.4  |
| 4160 | 145.06 | 95.53 | 48.64 | 35.12 | 28.37 |
| 4162 | 144.86 | 95.44 | 48.61 | 35.1  | 28.37 |
| 4164 | 144.71 | 95.37 | 48.62 | 35.12 | 28.38 |
| 4166 | 144.56 | 95.29 | 48.61 | 35.11 | 28.37 |
| 4168 | 144.39 | 95.19 | 48.58 | 35.09 | 28.36 |
| 4170 | 144.22 | 95.14 | 48.59 | 35.09 | 28.36 |
| 4172 | 144.07 | 95.06 | 48.58 | 35.08 | 28.36 |
| 4174 | 143.88 | 94.96 | 48.55 | 35.05 | 28.33 |
| 4176 | 143.71 | 94.86 | 48.53 | 35.02 | 28.31 |
| 4178 | 143.53 | 94.77 | 48.53 | 35.02 | 28.31 |
| 4180 | 143.37 | 94.71 | 48.51 | 35.01 | 28.32 |
| 4182 | 143.21 | 94.62 | 48.5  | 35    | 28.3  |

|      |        |       |       |       |       |
|------|--------|-------|-------|-------|-------|
| 4184 | 143.08 | 94.58 | 48.52 | 35.02 | 28.31 |
| 4186 | 142.9  | 94.49 | 48.5  | 35.01 | 28.31 |
| 4188 | 142.7  | 94.38 | 48.49 | 34.99 | 28.29 |
| 4190 | 142.53 | 94.3  | 48.45 | 34.95 | 28.27 |
| 4192 | 142.37 | 94.21 | 48.44 | 34.94 | 28.27 |
| 4194 | 142.2  | 94.13 | 48.43 | 34.93 | 28.25 |
| 4196 | 142.04 | 94.04 | 48.41 | 34.92 | 28.25 |
| 4198 | 141.86 | 93.96 | 48.39 | 34.9  | 28.22 |
| 4200 | 141.7  | 93.89 | 48.4  | 34.9  | 28.23 |
| 4202 | 141.54 | 93.82 | 48.41 | 34.91 | 28.25 |
| 4204 | 141.36 | 93.73 | 48.37 | 34.86 | 28.22 |
| 4206 | 141.21 | 93.64 | 48.36 | 34.85 | 28.23 |
| 4208 | 141.07 | 93.61 | 48.39 | 34.88 | 28.27 |
| 4210 | 140.86 | 93.5  | 48.35 | 34.84 | 28.22 |
| 4212 | 140.7  | 93.42 | 48.35 | 34.84 | 28.22 |
| 4214 | 140.55 | 93.35 | 48.32 | 34.83 | 28.21 |
| 4216 | 140.41 | 93.3  | 48.33 | 34.83 | 28.22 |
| 4218 | 140.21 | 93.2  | 48.3  | 34.8  | 28.18 |
| 4220 | 140.02 | 93.08 | 48.27 | 34.78 | 28.17 |
| 4222 | 139.86 | 93.02 | 48.26 | 34.77 | 28.16 |
| 4224 | 139.74 | 92.96 | 48.27 | 34.77 | 28.2  |
| 4226 | 139.53 | 92.84 | 48.23 | 34.74 | 28.16 |
| 4228 | 139.37 | 92.75 | 48.21 | 34.71 | 28.14 |
| 4230 | 139.22 | 92.67 | 48.2  | 34.7  | 28.13 |
| 4232 | 139.07 | 92.6  | 48.18 | 34.7  | 28.12 |
| 4234 | 138.92 | 92.53 | 48.17 | 34.69 | 28.12 |
| 4236 | 138.74 | 92.44 | 48.17 | 34.68 | 28.11 |
| 4238 | 138.61 | 92.39 | 48.18 | 34.69 | 28.11 |
| 4240 | 138.45 | 92.3  | 48.15 | 34.67 | 28.1  |
| 4242 | 138.3  | 92.23 | 48.14 | 34.66 | 28.1  |
| 4244 | 138.14 | 92.16 | 48.14 | 34.65 | 28.1  |
| 4246 | 137.96 | 92.05 | 48.11 | 34.63 | 28.08 |
| 4248 | 137.79 | 91.95 | 48.07 | 34.6  | 28.05 |
| 4250 | 137.61 | 91.88 | 48.06 | 34.59 | 28.05 |
| 4252 | 137.47 | 91.8  | 48.07 | 34.59 | 28.05 |
| 4254 | 137.32 | 91.74 | 48.05 | 34.58 | 28.05 |
| 4256 | 137.15 | 91.66 | 48.04 | 34.56 | 28.04 |
| 4258 | 136.97 | 91.57 | 48.03 | 34.55 | 28.04 |
| 4260 | 136.82 | 91.5  | 48.01 | 34.53 | 28.04 |
| 4262 | 136.67 | 91.41 | 48    | 34.52 | 28.02 |
| 4264 | 136.49 | 91.32 | 47.98 | 34.49 | 28.01 |
| 4266 | 136.36 | 91.26 | 47.97 | 34.49 | 28    |
| 4268 | 136.17 | 91.17 | 47.93 | 34.46 | 27.97 |
| 4270 | 136.04 | 91.1  | 47.95 | 34.47 | 27.99 |

|      |        |       |       |       |       |
|------|--------|-------|-------|-------|-------|
| 4272 | 135.85 | 91    | 47.89 | 34.43 | 27.96 |
| 4274 | 135.69 | 90.93 | 47.89 | 34.42 | 27.95 |
| 4276 | 135.56 | 90.88 | 47.91 | 34.46 | 27.97 |
| 4278 | 135.41 | 90.79 | 47.89 | 34.44 | 27.97 |
| 4280 | 135.27 | 90.73 | 47.89 | 34.43 | 27.96 |
| 4282 | 135.11 | 90.66 | 47.88 | 34.42 | 27.96 |
| 4284 | 134.94 | 90.56 | 47.87 | 34.41 | 27.95 |
| 4286 | 134.79 | 90.49 | 47.85 | 34.39 | 27.94 |
| 4288 | 134.64 | 90.42 | 47.84 | 34.38 | 27.94 |
| 4290 | 134.5  | 90.35 | 47.83 | 34.38 | 27.94 |
| 4292 | 134.3  | 90.23 | 47.79 | 34.34 | 27.9  |
| 4294 | 134.16 | 90.16 | 47.79 | 34.34 | 27.9  |
| 4296 | 134    | 90.08 | 47.77 | 34.32 | 27.9  |
| 4298 | 133.85 | 90.03 | 47.78 | 34.33 | 27.91 |
| 4300 | 133.7  | 89.94 | 47.76 | 34.31 | 27.9  |
| 4302 | 133.55 | 89.87 | 47.75 | 34.3  | 27.89 |
| 4304 | 133.4  | 89.79 | 47.73 | 34.26 | 27.87 |
| 4306 | 133.22 | 89.71 | 47.71 | 34.26 | 27.86 |
| 4308 | 133.1  | 89.64 | 47.71 | 34.26 | 27.87 |
| 4310 | 132.95 | 89.57 | 47.7  | 34.26 | 27.86 |
| 4312 | 132.8  | 89.5  | 47.69 | 34.25 | 27.86 |
| 4314 | 132.66 | 89.43 | 47.68 | 34.24 | 27.85 |
| 4316 | 132.48 | 89.35 | 47.67 | 34.23 | 27.84 |
| 4318 | 132.34 | 89.27 | 47.65 | 34.21 | 27.84 |
| 4320 | 132.19 | 89.2  | 47.64 | 34.2  | 27.83 |
| 4322 | 132.04 | 89.13 | 47.63 | 34.19 | 27.83 |
| 4324 | 131.9  | 89.08 | 47.65 | 34.22 | 27.85 |
| 4326 | 131.75 | 88.99 | 47.64 | 34.21 | 27.87 |
| 4328 | 131.59 | 88.9  | 47.59 | 34.17 | 27.82 |
| 4330 | 131.41 | 88.81 | 47.57 | 34.14 | 27.81 |
| 4332 | 131.26 | 88.73 | 47.55 | 34.13 | 27.8  |
| 4334 | 131.12 | 88.66 | 47.54 | 34.12 | 27.79 |
| 4336 | 130.98 | 88.59 | 47.53 | 34.11 | 27.79 |
| 4338 | 130.81 | 88.5  | 47.52 | 34.1  | 27.78 |
| 4340 | 130.67 | 88.43 | 47.51 | 34.09 | 27.77 |
| 4342 | 130.52 | 88.36 | 47.49 | 34.07 | 27.77 |
| 4344 | 130.4  | 88.31 | 47.5  | 34.08 | 27.78 |
| 4346 | 130.28 | 88.26 | 47.5  | 34.09 | 27.79 |
| 4348 | 130.08 | 88.13 | 47.46 | 34.05 | 27.74 |
| 4350 | 129.97 | 88.08 | 47.46 | 34.05 | 27.75 |
| 4352 | 129.8  | 88    | 47.44 | 34.03 | 27.74 |
| 4354 | 129.66 | 87.94 | 47.44 | 34.03 | 27.76 |
| 4356 | 129.52 | 87.88 | 47.44 | 34.03 | 27.75 |
| 4358 | 129.37 | 87.79 | 47.42 | 34.01 | 27.74 |



|      |        |       |       |       |       |
|------|--------|-------|-------|-------|-------|
| 4360 | 129.24 | 87.73 | 47.43 | 34.02 | 27.75 |
| 4362 | 129.05 | 87.63 | 47.39 | 33.99 | 27.72 |
| 4364 | 128.87 | 87.53 | 47.34 | 33.95 | 27.68 |
| 4366 | 128.75 | 87.48 | 47.34 | 33.94 | 27.68 |
| 4368 | 128.62 | 87.41 | 47.34 | 33.95 | 27.69 |
| 4370 | 128.45 | 87.33 | 47.33 | 33.94 | 27.69 |
| 4372 | 128.31 | 87.26 | 47.31 | 33.93 | 27.68 |
| 4374 | 128.2  | 87.22 | 47.31 | 33.93 | 27.68 |
| 4376 | 128.04 | 87.13 | 47.29 | 33.91 | 27.67 |
| 4378 | 127.87 | 87.05 | 47.28 | 33.89 | 27.66 |
| 4380 | 127.73 | 86.97 | 47.26 | 33.88 | 27.65 |
| 4382 | 127.65 | 86.95 | 47.29 | 33.92 | 27.69 |
| 4384 | 127.49 | 86.86 | 47.26 | 33.89 | 27.66 |
| 4386 | 127.31 | 86.75 | 47.24 | 33.86 | 27.64 |
| 4388 | 127.15 | 86.67 | 47.21 | 33.84 | 27.62 |
| 4390 | 127.01 | 86.6  | 47.19 | 33.82 | 27.62 |
| 4392 | 126.89 | 86.54 | 47.2  | 33.82 | 27.63 |
| 4394 | 126.72 | 86.46 | 47.17 | 33.8  | 27.6  |
| 4396 | 126.6  | 86.39 | 47.17 | 33.81 | 27.61 |
| 4398 | 126.45 | 86.3  | 47.14 | 33.77 | 27.59 |
| 4400 | 126.35 | 86.28 | 47.17 | 33.8  | 27.62 |
| 4402 | 126.15 | 86.16 | 47.11 | 33.75 | 27.58 |
| 4404 | 126.03 | 86.09 | 47.11 | 33.75 | 27.58 |
| 4406 | 125.91 | 86.04 | 47.11 | 33.75 | 27.57 |
| 4408 | 125.75 | 85.95 | 47.08 | 33.73 | 27.57 |
| 4410 | 125.58 | 85.87 | 47.06 | 33.72 | 27.55 |
| 4412 | 125.47 | 85.81 | 47.06 | 33.71 | 27.55 |
| 4414 | 125.33 | 85.73 | 47.04 | 33.7  | 27.55 |
| 4416 | 125.2  | 85.68 | 47.05 | 33.7  | 27.56 |
| 4418 | 125.08 | 85.63 | 47.05 | 33.7  | 27.58 |
| 4420 | 124.94 | 85.56 | 47.06 | 33.71 | 27.59 |
| 4422 | 124.79 | 85.47 | 47    | 33.67 | 27.56 |
| 4424 | 124.66 | 85.42 | 47    | 33.65 | 27.53 |
| 4426 | 124.47 | 85.32 | 46.97 | 33.63 | 27.52 |
| 4428 | 124.35 | 85.26 | 46.97 | 33.64 | 27.53 |
| 4430 | 124.2  | 85.19 | 46.94 | 33.61 | 27.5  |
| 4432 | 124.06 | 85.11 | 46.92 | 33.6  | 27.49 |
| 4434 | 123.91 | 85.04 | 46.91 | 33.59 | 27.49 |
| 4436 | 123.76 | 84.96 | 46.89 | 33.58 | 27.48 |
| 4438 | 123.64 | 84.9  | 46.88 | 33.58 | 27.49 |
| 4440 | 123.53 | 84.85 | 46.89 | 33.58 | 27.48 |
| 4442 | 123.37 | 84.75 | 46.86 | 33.55 | 27.46 |
| 4444 | 123.23 | 84.69 | 46.85 | 33.54 | 27.46 |
| 4446 | 123.08 | 84.61 | 46.83 | 33.51 | 27.45 |

|      |        |       |       |       |       |
|------|--------|-------|-------|-------|-------|
| 4448 | 122.96 | 84.56 | 46.84 | 33.53 | 27.47 |
| 4450 | 122.81 | 84.46 | 46.8  | 33.5  | 27.43 |
| 4452 | 122.66 | 84.4  | 46.8  | 33.49 | 27.44 |
| 4454 | 122.56 | 84.35 | 46.8  | 33.5  | 27.46 |
| 4456 | 122.41 | 84.27 | 46.79 | 33.49 | 27.45 |
| 4458 | 122.29 | 84.22 | 46.78 | 33.5  | 27.46 |
| 4460 | 122.18 | 84.15 | 46.79 | 33.51 | 27.46 |
| 4462 | 122.05 | 84.09 | 46.77 | 33.5  | 27.45 |
| 4464 | 121.89 | 84.02 | 46.75 | 33.47 | 27.43 |
| 4466 | 121.78 | 83.95 | 46.74 | 33.47 | 27.44 |
| 4468 | 121.63 | 83.89 | 46.73 | 33.46 | 27.44 |
| 4470 | 121.51 | 83.82 | 46.72 | 33.45 | 27.44 |
| 4472 | 121.37 | 83.75 | 46.71 | 33.44 | 27.42 |
| 4474 | 121.24 | 83.68 | 46.69 | 33.42 | 27.42 |
| 4476 | 121.08 | 83.6  | 46.67 | 33.4  | 27.42 |
| 4478 | 120.95 | 83.52 | 46.65 | 33.39 | 27.41 |
| 4480 | 120.78 | 83.42 | 46.6  | 33.34 | 27.37 |
| 4482 | 120.64 | 83.34 | 46.57 | 33.31 | 27.33 |
| 4484 | 120.52 | 83.31 | 46.59 | 33.34 | 27.36 |
| 4486 | 120.39 | 83.23 | 46.56 | 33.31 | 27.33 |
| 4488 | 120.28 | 83.18 | 46.56 | 33.32 | 27.35 |
| 4490 | 120.1  | 83.07 | 46.52 | 33.27 | 27.32 |
| 4492 | 119.97 | 82.99 | 46.48 | 33.25 | 27.29 |
| 4494 | 119.86 | 82.95 | 46.49 | 33.27 | 27.31 |
| 4496 | 119.75 | 82.9  | 46.5  | 33.29 | 27.32 |
| 4498 | 119.61 | 82.83 | 46.47 | 33.25 | 27.29 |
| 4500 | 119.45 | 82.73 | 46.45 | 33.22 | 27.28 |
| 4502 | 119.31 | 82.65 | 46.43 | 33.2  | 27.28 |
| 4504 | 119.18 | 82.59 | 46.42 | 33.2  | 27.27 |
| 4506 | 119.05 | 82.52 | 46.4  | 33.18 | 27.26 |
| 4508 | 118.93 | 82.47 | 46.41 | 33.18 | 27.28 |
| 4510 | 118.78 | 82.38 | 46.37 | 33.16 | 27.25 |
| 4512 | 118.68 | 82.34 | 46.38 | 33.18 | 27.26 |
| 4514 | 118.55 | 82.3  | 46.4  | 33.19 | 27.29 |
| 4516 | 118.41 | 82.21 | 46.37 | 33.17 | 27.28 |
| 4518 | 118.3  | 82.15 | 46.37 | 33.17 | 27.28 |
| 4520 | 118.15 | 82.04 | 46.31 | 33.12 | 27.23 |
| 4522 | 118.01 | 81.99 | 46.31 | 33.12 | 27.24 |
| 4524 | 117.87 | 81.91 | 46.28 | 33.1  | 27.22 |
| 4526 | 117.74 | 81.84 | 46.26 | 33.08 | 27.21 |
| 4528 | 117.61 | 81.76 | 46.24 | 33.05 | 27.19 |
| 4530 | 117.49 | 81.71 | 46.24 | 33.06 | 27.19 |
| 4532 | 117.34 | 81.64 | 46.21 | 33.04 | 27.18 |
| 4534 | 117.21 | 81.56 | 46.2  | 33.04 | 27.18 |

|      |        |       |       |       |       |
|------|--------|-------|-------|-------|-------|
| 4536 | 117.09 | 81.5  | 46.17 | 33.01 | 27.16 |
| 4538 | 116.95 | 81.44 | 46.17 | 33.01 | 27.17 |
| 4540 | 116.82 | 81.36 | 46.16 | 33    | 27.17 |
| 4542 | 116.69 | 81.3  | 46.14 | 32.98 | 27.17 |
| 4544 | 116.56 | 81.23 | 46.12 | 32.96 | 27.14 |
| 4546 | 116.43 | 81.16 | 46.11 | 32.96 | 27.14 |
| 4548 | 116.33 | 81.13 | 46.13 | 32.98 | 27.16 |
| 4550 | 116.2  | 81.05 | 46.1  | 32.96 | 27.15 |
| 4552 | 116.09 | 81    | 46.1  | 32.96 | 27.16 |
| 4554 | 115.93 | 80.91 | 46.07 | 32.93 | 27.13 |
| 4556 | 115.84 | 80.89 | 46.09 | 32.96 | 27.17 |
| 4558 | 115.73 | 80.83 | 46.08 | 32.96 | 27.17 |
| 4560 | 115.61 | 80.76 | 46.08 | 32.94 | 27.16 |
| 4562 | 115.43 | 80.65 | 46.03 | 32.9  | 27.12 |
| 4564 | 115.32 | 80.6  | 46.02 | 32.91 | 27.13 |
| 4566 | 115.19 | 80.53 | 46    | 32.89 | 27.12 |
| 4568 | 115.08 | 80.48 | 46    | 32.89 | 27.12 |
| 4570 | 114.94 | 80.39 | 45.96 | 32.87 | 27.1  |
| 4572 | 114.82 | 80.34 | 45.95 | 32.85 | 27.09 |
| 4574 | 114.68 | 80.27 | 45.94 | 32.84 | 27.08 |
| 4576 | 114.56 | 80.19 | 45.92 | 32.82 | 27.07 |
| 4578 | 114.41 | 80.13 | 45.9  | 32.81 | 27.06 |
| 4580 | 114.3  | 80.05 | 45.89 | 32.81 | 27.05 |
| 4582 | 114.16 | 79.97 | 45.85 | 32.79 | 27.04 |
| 4584 | 114.02 | 79.89 | 45.82 | 32.76 | 27    |
| 4586 | 113.91 | 79.83 | 45.83 | 32.77 | 27.02 |
| 4588 | 113.75 | 79.75 | 45.78 | 32.72 | 26.99 |
| 4590 | 113.67 | 79.72 | 45.81 | 32.75 | 27.01 |
| 4592 | 113.56 | 79.67 | 45.81 | 32.75 | 27.02 |
| 4594 | 113.43 | 79.61 | 45.78 | 32.74 | 27    |
| 4596 | 113.31 | 79.53 | 45.77 | 32.73 | 27.01 |
| 4598 | 113.19 | 79.47 | 45.76 | 32.71 | 27    |
| 4600 | 113.07 | 79.41 | 45.74 | 32.7  | 26.99 |
| 4602 | 112.93 | 79.35 | 45.73 | 32.69 | 26.99 |
| 4604 | 112.82 | 79.28 | 45.72 | 32.69 | 26.98 |
| 4606 | 112.7  | 79.22 | 45.7  | 32.67 | 26.98 |
| 4608 | 112.63 | 79.2  | 45.73 | 32.7  | 27.01 |
| 4610 | 112.46 | 79.11 | 45.69 | 32.66 | 26.98 |
| 4612 | 112.34 | 79.03 | 45.66 | 32.63 | 26.96 |
| 4614 | 112.22 | 78.96 | 45.64 | 32.63 | 26.96 |
| 4616 | 112.11 | 78.9  | 45.64 | 32.62 | 26.95 |
| 4618 | 111.97 | 78.83 | 45.62 | 32.61 | 26.94 |
| 4620 | 111.86 | 78.77 | 45.61 | 32.61 | 26.93 |
| 4622 | 111.75 | 78.71 | 45.6  | 32.6  | 26.93 |

|      |        |       |       |       |       |
|------|--------|-------|-------|-------|-------|
| 4624 | 111.64 | 78.65 | 45.58 | 32.59 | 26.92 |
| 4626 | 111.49 | 78.57 | 45.55 | 32.56 | 26.89 |
| 4628 | 111.38 | 78.51 | 45.55 | 32.57 | 26.91 |
| 4630 | 111.27 | 78.45 | 45.52 | 32.55 | 26.9  |
| 4632 | 111.14 | 78.39 | 45.51 | 32.55 | 26.88 |
| 4634 | 111.02 | 78.33 | 45.51 | 32.55 | 26.89 |
| 4636 | 110.9  | 78.26 | 45.5  | 32.53 | 26.89 |
| 4638 | 110.78 | 78.19 | 45.48 | 32.51 | 26.87 |
| 4640 | 110.66 | 78.13 | 45.46 | 32.5  | 26.87 |
| 4642 | 110.55 | 78.07 | 45.45 | 32.49 | 26.87 |
| 4644 | 110.39 | 77.97 | 45.41 | 32.46 | 26.83 |
| 4646 | 110.3  | 77.92 | 45.4  | 32.46 | 26.84 |
| 4648 | 110.19 | 77.87 | 45.39 | 32.46 | 26.85 |
| 4650 | 110.07 | 77.82 | 45.39 | 32.45 | 26.85 |
| 4652 | 109.96 | 77.77 | 45.38 | 32.46 | 26.86 |
| 4654 | 109.84 | 77.7  | 45.36 | 32.44 | 26.83 |
| 4656 | 109.73 | 77.64 | 45.35 | 32.43 | 26.83 |
| 4658 | 109.64 | 77.61 | 45.35 | 32.45 | 26.83 |
| 4660 | 109.51 | 77.53 | 45.34 | 32.43 | 26.83 |
| 4662 | 109.37 | 77.46 | 45.31 | 32.41 | 26.81 |
| 4664 | 109.27 | 77.4  | 45.3  | 32.4  | 26.81 |
| 4666 | 109.13 | 77.33 | 45.28 | 32.39 | 26.8  |
| 4668 | 109.01 | 77.27 | 45.26 | 32.37 | 26.79 |
| 4670 | 108.89 | 77.19 | 45.24 | 32.33 | 26.77 |
| 4672 | 108.78 | 77.13 | 45.23 | 32.33 | 26.78 |
| 4674 | 108.65 | 77.07 | 45.22 | 32.33 | 26.78 |
| 4676 | 108.54 | 77.01 | 45.21 | 32.32 | 26.77 |
| 4678 | 108.43 | 76.96 | 45.19 | 32.32 | 26.77 |
| 4680 | 108.31 | 76.9  | 45.17 | 32.3  | 26.75 |
| 4682 | 108.19 | 76.84 | 45.16 | 32.3  | 26.75 |
| 4684 | 108.08 | 76.77 | 45.15 | 32.3  | 26.75 |
| 4686 | 107.98 | 76.72 | 45.13 | 32.29 | 26.74 |
| 4688 | 107.86 | 76.66 | 45.12 | 32.28 | 26.73 |
| 4690 | 107.71 | 76.59 | 45.09 | 32.26 | 26.7  |
| 4692 | 107.62 | 76.53 | 45.08 | 32.26 | 26.72 |
| 4694 | 107.52 | 76.47 | 45.08 | 32.24 | 26.71 |
| 4696 | 107.38 | 76.39 | 45.03 | 32.2  | 26.67 |
| 4698 | 107.25 | 76.34 | 45.03 | 32.21 | 26.68 |
| 4700 | 107.16 | 76.28 | 45.02 | 32.2  | 26.7  |
| 4702 | 107.06 | 76.23 | 45.02 | 32.2  | 26.69 |
| 4704 | 106.93 | 76.16 | 44.99 | 32.18 | 26.67 |
| 4706 | 106.83 | 76.1  | 44.98 | 32.18 | 26.68 |
| 4708 | 106.71 | 76.05 | 44.97 | 32.17 | 26.67 |
| 4710 | 106.58 | 75.98 | 44.94 | 32.15 | 26.66 |

|      |        |       |       |       |       |
|------|--------|-------|-------|-------|-------|
| 4712 | 106.48 | 75.92 | 44.92 | 32.13 | 26.65 |
| 4714 | 106.34 | 75.84 | 44.88 | 32.11 | 26.62 |
| 4716 | 106.27 | 75.81 | 44.92 | 32.14 | 26.65 |
| 4718 | 106.16 | 75.75 | 44.9  | 32.13 | 26.65 |
| 4720 | 106.04 | 75.7  | 44.89 | 32.12 | 26.64 |
| 4722 | 105.93 | 75.63 | 44.87 | 32.11 | 26.64 |
| 4724 | 105.81 | 75.57 | 44.86 | 32.1  | 26.63 |
| 4726 | 105.7  | 75.51 | 44.84 | 32.09 | 26.62 |
| 4728 | 105.58 | 75.42 | 44.81 | 32.06 | 26.58 |
| 4730 | 105.47 | 75.38 | 44.82 | 32.07 | 26.61 |
| 4732 | 105.34 | 75.3  | 44.78 | 32.03 | 26.58 |
| 4734 | 105.25 | 75.27 | 44.79 | 32.06 | 26.6  |
| 4736 | 105.15 | 75.21 | 44.77 | 32.04 | 26.59 |
| 4738 | 105.02 | 75.14 | 44.75 | 32.04 | 26.6  |
| 4740 | 104.91 | 75.08 | 44.74 | 32.02 | 26.59 |
| 4742 | 104.8  | 75.02 | 44.72 | 32.01 | 26.58 |
| 4744 | 104.69 | 74.96 | 44.7  | 32    | 26.57 |
| 4746 | 104.57 | 74.89 | 44.69 | 31.99 | 26.57 |
| 4748 | 104.43 | 74.81 | 44.67 | 31.96 | 26.55 |
| 4750 | 104.35 | 74.77 | 44.65 | 31.96 | 26.55 |
| 4752 | 104.22 | 74.69 | 44.61 | 31.92 | 26.52 |
| 4754 | 104.08 | 74.63 | 44.59 | 31.92 | 26.52 |
| 4756 | 103.99 | 74.57 | 44.57 | 31.9  | 26.49 |
| 4758 | 103.91 | 74.54 | 44.59 | 31.92 | 26.51 |
| 4760 | 103.82 | 74.5  | 44.59 | 31.93 | 26.53 |
| 4762 | 103.7  | 74.43 | 44.58 | 31.92 | 26.53 |
| 4764 | 103.56 | 74.35 | 44.53 | 31.89 | 26.51 |
| 4766 | 103.47 | 74.3  | 44.53 | 31.88 | 26.49 |
| 4768 | 103.35 | 74.24 | 44.51 | 31.87 | 26.47 |
| 4770 | 103.27 | 74.2  | 44.52 | 31.88 | 26.5  |
| 4772 | 103.15 | 74.12 | 44.49 | 31.84 | 26.48 |
| 4774 | 103.03 | 74.06 | 44.46 | 31.82 | 26.47 |
| 4776 | 102.92 | 74    | 44.43 | 31.82 | 26.47 |
| 4778 | 102.84 | 73.97 | 44.45 | 31.83 | 26.49 |
| 4780 | 102.74 | 73.92 | 44.45 | 31.82 | 26.48 |
| 4782 | 102.6  | 73.83 | 44.41 | 31.8  | 26.45 |
| 4784 | 102.51 | 73.78 | 44.4  | 31.79 | 26.46 |
| 4786 | 102.39 | 73.74 | 44.4  | 31.81 | 26.47 |
| 4788 | 102.3  | 73.67 | 44.36 | 31.79 | 26.45 |
| 4790 | 102.19 | 73.62 | 44.37 | 31.78 | 26.45 |
| 4792 | 102.08 | 73.55 | 44.35 | 31.77 | 26.45 |
| 4794 | 101.98 | 73.5  | 44.34 | 31.76 | 26.45 |
| 4796 | 101.84 | 73.41 | 44.3  | 31.72 | 26.4  |
| 4798 | 101.72 | 73.34 | 44.27 | 31.71 | 26.39 |

|      |        |       |       |       |       |
|------|--------|-------|-------|-------|-------|
| 4800 | 101.64 | 73.3  | 44.27 | 31.71 | 26.4  |
| 4802 | 101.56 | 73.28 | 44.28 | 31.72 | 26.43 |
| 4804 | 101.43 | 73.2  | 44.26 | 31.71 | 26.42 |
| 4806 | 101.28 | 73.09 | 44.2  | 31.64 | 26.36 |
| 4808 | 101.18 | 73.04 | 44.2  | 31.65 | 26.37 |
| 4810 | 101.1  | 73.01 | 44.2  | 31.67 | 26.39 |
| 4812 | 101.01 | 72.96 | 44.19 | 31.66 | 26.39 |
| 4814 | 100.9  | 72.9  | 44.18 | 31.65 | 26.38 |
| 4816 | 100.82 | 72.86 | 44.18 | 31.66 | 26.38 |
| 4818 | 100.69 | 72.78 | 44.16 | 31.64 | 26.36 |
| 4820 | 100.61 | 72.75 | 44.14 | 31.64 | 26.37 |
| 4822 | 100.49 | 72.67 | 44.1  | 31.62 | 26.34 |
| 4824 | 100.42 | 72.64 | 44.1  | 31.61 | 26.35 |
| 4826 | 100.31 | 72.59 | 44.1  | 31.6  | 26.35 |
| 4828 | 100.2  | 72.52 | 44.08 | 31.59 | 26.34 |
| 4830 | 100.1  | 72.47 | 44.07 | 31.59 | 26.35 |
| 4832 | 99.99  | 72.41 | 44.05 | 31.58 | 26.33 |
| 4834 | 99.89  | 72.36 | 44.05 | 31.58 | 26.34 |
| 4836 | 99.78  | 72.29 | 44.02 | 31.56 | 26.33 |
| 4838 | 99.62  | 72.19 | 43.95 | 31.49 | 26.27 |
| 4840 | 99.52  | 72.13 | 43.93 | 31.47 | 26.26 |
| 4842 | 99.43  | 72.1  | 43.95 | 31.49 | 26.27 |
| 4844 | 99.31  | 72.03 | 43.91 | 31.46 | 26.25 |
| 4846 | 99.24  | 72    | 43.93 | 31.5  | 26.28 |
| 4848 | 99.14  | 71.93 | 43.91 | 31.46 | 26.28 |
| 4850 | 99.05  | 71.89 | 43.9  | 31.47 | 26.27 |
| 4852 | 98.96  | 71.85 | 43.9  | 31.49 | 26.28 |
| 4854 | 98.88  | 71.8  | 43.9  | 31.49 | 26.28 |
| 4856 | 98.77  | 71.73 | 43.86 | 31.46 | 26.25 |
| 4858 | 98.67  | 71.68 | 43.85 | 31.46 | 26.26 |
| 4860 | 98.56  | 71.63 | 43.85 | 31.45 | 26.26 |
| 4862 | 98.46  | 71.57 | 43.83 | 31.43 | 26.25 |
| 4864 | 98.38  | 71.52 | 43.83 | 31.44 | 26.26 |
| 4866 | 98.24  | 71.45 | 43.8  | 31.42 | 26.24 |
| 4868 | 98.16  | 71.4  | 43.79 | 31.41 | 26.23 |
| 4870 | 98.06  | 71.34 | 43.77 | 31.4  | 26.24 |
| 4872 | 97.96  | 71.29 | 43.76 | 31.39 | 26.23 |
| 4874 | 97.86  | 71.23 | 43.74 | 31.38 | 26.22 |
| 4876 | 97.75  | 71.16 | 43.72 | 31.36 | 26.21 |
| 4878 | 97.66  | 71.12 | 43.71 | 31.37 | 26.22 |
| 4880 | 97.55  | 71.05 | 43.68 | 31.34 | 26.2  |
| 4882 | 97.42  | 70.97 | 43.64 | 31.3  | 26.15 |
| 4884 | 97.37  | 70.96 | 43.67 | 31.34 | 26.2  |
| 4886 | 97.28  | 70.92 | 43.67 | 31.35 | 26.19 |

|      |       |       |       |       |       |
|------|-------|-------|-------|-------|-------|
| 4888 | 97.13 | 70.82 | 43.6  | 31.29 | 26.15 |
| 4890 | 97.05 | 70.78 | 43.63 | 31.31 | 26.17 |
| 4892 | 96.94 | 70.73 | 43.59 | 31.3  | 26.17 |
| 4894 | 96.84 | 70.68 | 43.58 | 31.29 | 26.15 |
| 4896 | 96.78 | 70.64 | 43.59 | 31.3  | 26.17 |
| 4898 | 96.66 | 70.59 | 43.57 | 31.28 | 26.15 |
| 4900 | 96.57 | 70.53 | 43.56 | 31.28 | 26.16 |
| 4902 | 96.44 | 70.44 | 43.51 | 31.23 | 26.12 |
| 4904 | 96.32 | 70.38 | 43.48 | 31.2  | 26.11 |
| 4906 | 96.23 | 70.33 | 43.47 | 31.19 | 26.1  |
| 4908 | 96.17 | 70.31 | 43.5  | 31.23 | 26.14 |
| 4910 | 96.06 | 70.25 | 43.47 | 31.21 | 26.12 |
| 4912 | 95.97 | 70.21 | 43.46 | 31.21 | 26.12 |
| 4914 | 95.87 | 70.15 | 43.46 | 31.21 | 26.12 |
| 4916 | 95.78 | 70.1  | 43.45 | 31.2  | 26.12 |
| 4918 | 95.69 | 70.06 | 43.43 | 31.19 | 26.12 |
| 4920 | 95.61 | 70.01 | 43.42 | 31.18 | 26.11 |
| 4922 | 95.49 | 69.93 | 43.38 | 31.17 | 26.1  |
| 4924 | 95.41 | 69.9  | 43.39 | 31.18 | 26.1  |
| 4926 | 95.33 | 69.85 | 43.38 | 31.17 | 26.1  |
| 4928 | 95.22 | 69.78 | 43.36 | 31.14 | 26.08 |
| 4930 | 95.15 | 69.74 | 43.34 | 31.14 | 26.08 |
| 4932 | 95.03 | 69.68 | 43.33 | 31.14 | 26.06 |
| 4934 | 94.96 | 69.64 | 43.32 | 31.14 | 26.07 |
| 4936 | 94.83 | 69.56 | 43.28 | 31.1  | 26.04 |
| 4938 | 94.74 | 69.52 | 43.27 | 31.1  | 26.04 |
| 4940 | 94.66 | 69.48 | 43.28 | 31.11 | 26.07 |
| 4942 | 94.55 | 69.4  | 43.24 | 31.07 | 26.05 |
| 4944 | 94.45 | 69.36 | 43.24 | 31.08 | 26.05 |
| 4946 | 94.37 | 69.33 | 43.24 | 31.08 | 26.06 |
| 4948 | 94.27 | 69.26 | 43.22 | 31.06 | 26.03 |
| 4950 | 94.18 | 69.21 | 43.21 | 31.07 | 26.04 |
| 4952 | 94.05 | 69.13 | 43.16 | 31.01 | 25.99 |
| 4954 | 93.99 | 69.11 | 43.18 | 31.04 | 26.03 |
| 4956 | 93.89 | 69.05 | 43.15 | 31.03 | 26.02 |
| 4958 | 93.79 | 68.98 | 43.12 | 31.01 | 25.99 |
| 4960 | 93.71 | 68.94 | 43.13 | 31.01 | 26    |
| 4962 | 93.6  | 68.88 | 43.1  | 30.99 | 25.99 |
| 4964 | 93.49 | 68.81 | 43.06 | 30.96 | 25.96 |
| 4966 | 93.38 | 68.75 | 43.04 | 30.94 | 25.95 |
| 4968 | 93.33 | 68.71 | 43.04 | 30.95 | 25.97 |
| 4970 | 93.21 | 68.65 | 43.02 | 30.93 | 25.95 |
| 4972 | 93.13 | 68.62 | 43.02 | 30.93 | 25.96 |
| 4974 | 93.07 | 68.59 | 43.04 | 30.95 | 25.99 |

|      |       |       |       |       |       |
|------|-------|-------|-------|-------|-------|
| 4976 | 93.02 | 68.57 | 43.05 | 30.97 | 25.99 |
| 4978 | 92.89 | 68.51 | 43.02 | 30.95 | 25.99 |
| 4980 | 92.83 | 68.47 | 43.03 | 30.96 | 25.99 |
| 4982 | 92.74 | 68.42 | 43    | 30.95 | 25.99 |
| 4984 | 92.62 | 68.35 | 42.97 | 30.93 | 25.97 |
| 4986 | 92.54 | 68.3  | 42.96 | 30.93 | 25.97 |
| 4988 | 92.43 | 68.23 | 42.93 | 30.91 | 25.94 |
| 4990 | 92.36 | 68.21 | 42.95 | 30.93 | 25.97 |
| 4992 | 92.26 | 68.15 | 42.93 | 30.9  | 25.96 |
| 4994 | 92.15 | 68.08 | 42.89 | 30.87 | 25.94 |
| 4996 | 92.03 | 68    | 42.85 | 30.86 | 25.92 |
| 4998 | 91.93 | 67.95 | 42.82 | 30.83 | 25.89 |
| 5000 | 91.86 | 67.91 | 42.83 | 30.84 | 25.91 |
| 5002 | 91.79 | 67.89 | 42.83 | 30.84 | 25.91 |
| 5004 | 91.71 | 67.85 | 42.84 | 30.85 | 25.92 |
| 5006 | 91.58 | 67.76 | 42.78 | 30.81 | 25.89 |
| 5008 | 91.53 | 67.74 | 42.8  | 30.83 | 25.92 |
| 5010 | 91.44 | 67.69 | 42.78 | 30.81 | 25.91 |
| 5012 | 91.34 | 67.63 | 42.77 | 30.8  | 25.9  |
| 5014 | 91.25 | 67.58 | 42.75 | 30.79 | 25.89 |
| 5016 | 91.19 | 67.54 | 42.75 | 30.8  | 25.91 |
| 5018 | 91.08 | 67.49 | 42.73 | 30.79 | 25.9  |
| 5020 | 91    | 67.44 | 42.72 | 30.78 | 25.89 |
| 5022 | 90.89 | 67.36 | 42.68 | 30.75 | 25.87 |
| 5024 | 90.82 | 67.34 | 42.69 | 30.76 | 25.89 |
| 5026 | 90.73 | 67.28 | 42.68 | 30.76 | 25.88 |
| 5028 | 90.64 | 67.23 | 42.67 | 30.75 | 25.88 |
| 5030 | 90.53 | 67.18 | 42.64 | 30.73 | 25.86 |
| 5032 | 90.47 | 67.14 | 42.63 | 30.73 | 25.85 |
| 5034 | 90.37 | 67.07 | 42.61 | 30.71 | 25.84 |
| 5036 | 90.3  | 67.04 | 42.61 | 30.73 | 25.86 |
| 5038 | 90.21 | 66.99 | 42.6  | 30.73 | 25.85 |
| 5040 | 90.11 | 66.94 | 42.57 | 30.7  | 25.84 |
| 5042 | 90.02 | 66.88 | 42.55 | 30.69 | 25.83 |
| 5044 | 89.92 | 66.82 | 42.51 | 30.66 | 25.8  |
| 5046 | 89.82 | 66.75 | 42.5  | 30.64 | 25.8  |
| 5048 | 89.77 | 66.74 | 42.53 | 30.68 | 25.82 |
| 5050 | 89.67 | 66.69 | 42.5  | 30.65 | 25.81 |
| 5052 | 89.55 | 66.61 | 42.45 | 30.62 | 25.78 |
| 5054 | 89.48 | 66.57 | 42.45 | 30.62 | 25.79 |
| 5056 | 89.4  | 66.53 | 42.45 | 30.62 | 25.77 |
| 5058 | 89.32 | 66.5  | 42.45 | 30.61 | 25.77 |
| 5060 | 89.22 | 66.44 | 42.43 | 30.6  | 25.78 |
| 5062 | 89.1  | 66.35 | 42.37 | 30.56 | 25.73 |



|      |       |       |       |       |       |
|------|-------|-------|-------|-------|-------|
| 5064 | 89.01 | 66.31 | 42.36 | 30.55 | 25.73 |
| 5066 | 88.96 | 66.3  | 42.39 | 30.58 | 25.77 |
| 5068 | 88.9  | 66.26 | 42.39 | 30.6  | 25.79 |
| 5070 | 88.78 | 66.18 | 42.33 | 30.54 | 25.74 |
| 5072 | 88.73 | 66.15 | 42.34 | 30.56 | 25.76 |
| 5074 | 88.64 | 66.12 | 42.34 | 30.56 | 25.77 |
| 5076 | 88.51 | 66.03 | 42.29 | 30.52 | 25.72 |
| 5078 | 88.46 | 66.02 | 42.32 | 30.55 | 25.76 |
| 5080 | 88.35 | 65.95 | 42.27 | 30.51 | 25.72 |
| 5082 | 88.28 | 65.9  | 42.26 | 30.51 | 25.72 |
| 5084 | 88.18 | 65.84 | 42.25 | 30.5  | 25.71 |
| 5086 | 88.1  | 65.81 | 42.24 | 30.52 | 25.73 |
| 5088 | 88.01 | 65.77 | 42.22 | 30.5  | 25.71 |
| 5090 | 87.95 | 65.73 | 42.22 | 30.5  | 25.72 |
| 5092 | 87.88 | 65.7  | 42.23 | 30.51 | 25.74 |
| 5094 | 87.8  | 65.65 | 42.22 | 30.5  | 25.73 |
| 5096 | 87.72 | 65.61 | 42.21 | 30.5  | 25.73 |
| 5098 | 87.62 | 65.54 | 42.17 | 30.48 | 25.7  |
| 5100 | 87.52 | 65.48 | 42.15 | 30.46 | 25.68 |
| 5102 | 87.44 | 65.45 | 42.16 | 30.47 | 25.7  |
| 5104 | 87.38 | 65.42 | 42.15 | 30.47 | 25.71 |
| 5106 | 87.28 | 65.35 | 42.12 | 30.45 | 25.7  |
| 5108 | 87.19 | 65.3  | 42.11 | 30.43 | 25.69 |
| 5110 | 87.11 | 65.26 | 42.09 | 30.42 | 25.68 |
| 5112 | 87.04 | 65.22 | 42.09 | 30.43 | 25.69 |
| 5114 | 86.98 | 65.18 | 42.07 | 30.42 | 25.69 |
| 5116 | 86.88 | 65.12 | 42.07 | 30.42 | 25.69 |
| 5118 | 86.79 | 65.07 | 42.03 | 30.39 | 25.66 |
| 5120 | 86.68 | 64.99 | 41.99 | 30.35 | 25.62 |
| 5122 | 86.57 | 64.94 | 41.97 | 30.34 | 25.61 |
| 5124 | 86.52 | 64.9  | 41.97 | 30.35 | 25.62 |
| 5126 | 86.44 | 64.87 | 41.97 | 30.35 | 25.63 |
| 5128 | 86.34 | 64.82 | 41.95 | 30.33 | 25.62 |
| 5130 | 86.25 | 64.76 | 41.92 | 30.32 | 25.6  |
| 5132 | 86.19 | 64.72 | 41.92 | 30.31 | 25.6  |
| 5134 | 86.1  | 64.68 | 41.9  | 30.31 | 25.6  |
| 5136 | 86.02 | 64.61 | 41.87 | 30.3  | 25.59 |
| 5138 | 85.92 | 64.56 | 41.85 | 30.28 | 25.57 |
| 5140 | 85.84 | 64.53 | 41.86 | 30.29 | 25.58 |
| 5142 | 85.76 | 64.47 | 41.84 | 30.26 | 25.56 |
| 5144 | 85.65 | 64.41 | 41.82 | 30.25 | 25.55 |
| 5146 | 85.6  | 64.41 | 41.83 | 30.26 | 25.58 |
| 5148 | 85.52 | 64.36 | 41.83 | 30.28 | 25.61 |
| 5150 | 85.42 | 64.29 | 41.78 | 30.23 | 25.56 |

|      |       |       |       |       |       |
|------|-------|-------|-------|-------|-------|
| 5152 | 85.36 | 64.26 | 41.77 | 30.23 | 25.56 |
| 5154 | 85.3  | 64.23 | 41.78 | 30.24 | 25.57 |
| 5156 | 85.2  | 64.17 | 41.75 | 30.23 | 25.56 |
| 5158 | 85.11 | 64.11 | 41.73 | 30.2  | 25.55 |
| 5160 | 85.08 | 64.11 | 41.74 | 30.24 | 25.57 |
| 5162 | 84.99 | 64.07 | 41.74 | 30.23 | 25.56 |
| 5164 | 84.89 | 64    | 41.7  | 30.21 | 25.54 |
| 5166 | 84.81 | 63.95 | 41.69 | 30.2  | 25.53 |
| 5168 | 84.73 | 63.91 | 41.67 | 30.19 | 25.54 |
| 5170 | 84.64 | 63.87 | 41.67 | 30.18 | 25.53 |
| 5172 | 84.59 | 63.83 | 41.68 | 30.2  | 25.55 |
| 5174 | 84.53 | 63.82 | 41.68 | 30.21 | 25.57 |
| 5176 | 84.44 | 63.76 | 41.66 | 30.2  | 25.56 |
| 5178 | 84.34 | 63.7  | 41.63 | 30.17 | 25.54 |
| 5180 | 84.26 | 63.65 | 41.6  | 30.15 | 25.53 |
| 5182 | 84.21 | 63.64 | 41.62 | 30.17 | 25.57 |
| 5184 | 84.08 | 63.55 | 41.57 | 30.13 | 25.51 |
| 5186 | 84.01 | 63.53 | 41.58 | 30.14 | 25.53 |
| 5188 | 83.93 | 63.48 | 41.57 | 30.13 | 25.51 |
| 5190 | 83.87 | 63.44 | 41.56 | 30.14 | 25.53 |
| 5192 | 83.79 | 63.37 | 41.52 | 30.12 | 25.51 |
| 5194 | 83.7  | 63.35 | 41.53 | 30.12 | 25.51 |
| 5196 | 83.64 | 63.31 | 41.52 | 30.12 | 25.52 |
| 5198 | 83.54 | 63.25 | 41.5  | 30.1  | 25.51 |
| 5200 | 83.45 | 63.19 | 41.46 | 30.07 | 25.48 |
| 5202 | 83.37 | 63.13 | 41.44 | 30.07 | 25.48 |
| 5204 | 83.3  | 63.09 | 41.43 | 30.07 | 25.47 |
| 5206 | 83.22 | 63.06 | 41.42 | 30.06 | 25.46 |
| 5208 | 83.15 | 63.01 | 41.41 | 30.05 | 25.46 |
| 5210 | 83.08 | 62.98 | 41.4  | 30.05 | 25.47 |
| 5212 | 83    | 62.93 | 41.4  | 30.06 | 25.48 |
| 5214 | 82.91 | 62.88 | 41.36 | 30.04 | 25.45 |
| 5216 | 82.84 | 62.84 | 41.36 | 30.03 | 25.44 |
| 5218 | 82.76 | 62.79 | 41.35 | 30.02 | 25.46 |
| 5220 | 82.67 | 62.74 | 41.33 | 30.01 | 25.45 |
| 5222 | 82.58 | 62.7  | 41.31 | 29.99 | 25.44 |
| 5224 | 82.52 | 62.65 | 41.29 | 29.98 | 25.44 |
| 5226 | 82.4  | 62.59 | 41.26 | 29.96 | 25.41 |
| 5228 | 82.35 | 62.57 | 41.28 | 29.98 | 25.43 |
| 5230 | 82.31 | 62.54 | 41.26 | 29.98 | 25.45 |
| 5232 | 82.23 | 62.5  | 41.26 | 29.97 | 25.43 |
| 5234 | 82.12 | 62.44 | 41.23 | 29.95 | 25.41 |
| 5236 | 82.06 | 62.39 | 41.22 | 29.95 | 25.41 |
| 5238 | 82.01 | 62.38 | 41.23 | 29.96 | 25.42 |

|      |       |       |       |       |       |
|------|-------|-------|-------|-------|-------|
| 5240 | 81.93 | 62.35 | 41.23 | 29.97 | 25.43 |
| 5242 | 81.85 | 62.31 | 41.2  | 29.95 | 25.42 |
| 5244 | 81.76 | 62.23 | 41.17 | 29.93 | 25.4  |
| 5246 | 81.69 | 62.19 | 41.16 | 29.92 | 25.39 |
| 5248 | 81.62 | 62.16 | 41.16 | 29.93 | 25.4  |
| 5250 | 81.52 | 62.12 | 41.13 | 29.9  | 25.38 |
| 5252 | 81.46 | 62.07 | 41.13 | 29.91 | 25.41 |
| 5254 | 81.39 | 62.02 | 41.11 | 29.89 | 25.38 |
| 5256 | 81.3  | 61.98 | 41.09 | 29.87 | 25.37 |
| 5258 | 81.22 | 61.93 | 41.08 | 29.87 | 25.37 |
| 5260 | 81.15 | 61.89 | 41.06 | 29.86 | 25.37 |
| 5262 | 81.08 | 61.85 | 41.05 | 29.86 | 25.37 |
| 5264 | 81.02 | 61.82 | 41.04 | 29.86 | 25.38 |
| 5266 | 80.96 | 61.8  | 41.06 | 29.87 | 25.4  |
| 5268 | 80.86 | 61.72 | 41.02 | 29.84 | 25.36 |
| 5270 | 80.77 | 61.66 | 40.98 | 29.8  | 25.33 |
| 5272 | 80.71 | 61.63 | 40.97 | 29.8  | 25.34 |
| 5274 | 80.63 | 61.59 | 40.97 | 29.81 | 25.34 |
| 5276 | 80.56 | 61.56 | 40.97 | 29.83 | 25.36 |
| 5278 | 80.48 | 61.51 | 40.94 | 29.8  | 25.34 |
| 5280 | 80.44 | 61.48 | 40.95 | 29.8  | 25.34 |
| 5282 | 80.33 | 61.43 | 40.92 | 29.78 | 25.33 |
| 5284 | 80.26 | 61.38 | 40.9  | 29.77 | 25.33 |
| 5286 | 80.18 | 61.33 | 40.89 | 29.77 | 25.32 |
| 5288 | 80.12 | 61.3  | 40.88 | 29.76 | 25.31 |
| 5290 | 80.03 | 61.25 | 40.87 | 29.76 | 25.32 |
| 5292 | 79.96 | 61.22 | 40.85 | 29.75 | 25.31 |
| 5294 | 79.9  | 61.17 | 40.84 | 29.74 | 25.31 |
| 5296 | 79.83 | 61.15 | 40.85 | 29.76 | 25.33 |
| 5298 | 79.75 | 61.1  | 40.84 | 29.75 | 25.31 |
| 5300 | 79.69 | 61.06 | 40.83 | 29.74 | 25.31 |
| 5302 | 79.61 | 61.01 | 40.8  | 29.73 | 25.29 |
| 5304 | 79.56 | 60.99 | 40.8  | 29.74 | 25.32 |
| 5306 | 79.47 | 60.94 | 40.78 | 29.72 | 25.29 |
| 5308 | 79.38 | 60.87 | 40.74 | 29.7  | 25.26 |
| 5310 | 79.35 | 60.88 | 40.77 | 29.75 | 25.3  |
| 5312 | 79.26 | 60.81 | 40.73 | 29.7  | 25.26 |
| 5314 | 79.17 | 60.76 | 40.71 | 29.7  | 25.27 |
| 5316 | 79.11 | 60.73 | 40.7  | 29.69 | 25.27 |
| 5318 | 79.05 | 60.7  | 40.7  | 29.68 | 25.27 |
| 5320 | 78.96 | 60.63 | 40.66 | 29.64 | 25.25 |
| 5322 | 78.89 | 60.62 | 40.69 | 29.68 | 25.28 |
| 5324 | 78.81 | 60.56 | 40.66 | 29.66 | 25.26 |
| 5326 | 78.75 | 60.52 | 40.64 | 29.65 | 25.25 |

|      |       |       |       |       |       |
|------|-------|-------|-------|-------|-------|
| 5328 | 78.68 | 60.49 | 40.63 | 29.64 | 25.25 |
| 5330 | 78.6  | 60.45 | 40.62 | 29.64 | 25.25 |
| 5332 | 78.53 | 60.4  | 40.6  | 29.63 | 25.24 |
| 5334 | 78.45 | 60.37 | 40.59 | 29.62 | 25.24 |
| 5336 | 78.38 | 60.32 | 40.57 | 29.61 | 25.23 |
| 5338 | 78.28 | 60.27 | 40.54 | 29.59 | 25.21 |
| 5340 | 78.22 | 60.24 | 40.54 | 29.59 | 25.22 |
| 5342 | 78.16 | 60.2  | 40.54 | 29.6  | 25.22 |
| 5344 | 78.11 | 60.18 | 40.54 | 29.6  | 25.23 |
| 5346 | 78.04 | 60.14 | 40.53 | 29.61 | 25.24 |
| 5348 | 77.96 | 60.09 | 40.51 | 29.59 | 25.22 |
| 5350 | 77.9  | 60.06 | 40.5  | 29.58 | 25.21 |
| 5352 | 77.83 | 60.02 | 40.48 | 29.58 | 25.21 |
| 5354 | 77.76 | 59.98 | 40.47 | 29.57 | 25.2  |
| 5356 | 77.69 | 59.93 | 40.46 | 29.56 | 25.21 |
| 5358 | 77.63 | 59.91 | 40.45 | 29.57 | 25.21 |
| 5360 | 77.6  | 59.9  | 40.49 | 29.6  | 25.26 |
| 5362 | 77.51 | 59.85 | 40.45 | 29.58 | 25.23 |
| 5364 | 77.44 | 59.81 | 40.45 | 29.56 | 25.23 |
| 5366 | 77.35 | 59.74 | 40.41 | 29.53 | 25.2  |
| 5368 | 77.29 | 59.71 | 40.4  | 29.53 | 25.2  |
| 5370 | 77.21 | 59.65 | 40.38 | 29.53 | 25.19 |
| 5372 | 77.15 | 59.63 | 40.38 | 29.52 | 25.2  |
| 5374 | 77.07 | 59.58 | 40.34 | 29.5  | 25.18 |
| 5376 | 77.04 | 59.57 | 40.37 | 29.54 | 25.22 |
| 5378 | 76.98 | 59.55 | 40.37 | 29.53 | 25.22 |
| 5380 | 76.9  | 59.5  | 40.37 | 29.54 | 25.22 |
| 5382 | 76.83 | 59.43 | 40.31 | 29.49 | 25.2  |
| 5384 | 76.79 | 59.43 | 40.33 | 29.53 | 25.22 |
| 5386 | 76.68 | 59.36 | 40.3  | 29.49 | 25.19 |
| 5388 | 76.59 | 59.3  | 40.25 | 29.45 | 25.15 |
| 5390 | 76.56 | 59.29 | 40.28 | 29.47 | 25.19 |
| 5392 | 76.49 | 59.25 | 40.27 | 29.46 | 25.17 |
| 5394 | 76.44 | 59.23 | 40.27 | 29.48 | 25.19 |
| 5396 | 76.35 | 59.18 | 40.24 | 29.48 | 25.18 |
| 5398 | 76.25 | 59.1  | 40.2  | 29.43 | 25.12 |
| 5400 | 76.2  | 59.07 | 40.19 | 29.43 | 25.14 |
| 5402 | 76.17 | 59.05 | 40.19 | 29.44 | 25.16 |
| 5404 | 76.08 | 59    | 40.18 | 29.43 | 25.14 |
| 5406 | 76.03 | 58.98 | 40.17 | 29.43 | 25.14 |
| 5408 | 75.93 | 58.92 | 40.14 | 29.41 | 25.12 |
| 5410 | 75.85 | 58.86 | 40.12 | 29.38 | 25.12 |
| 5412 | 75.8  | 58.85 | 40.12 | 29.39 | 25.13 |
| 5414 | 75.72 | 58.79 | 40.09 | 29.37 | 25.12 |

|      |       |       |       |       |       |
|------|-------|-------|-------|-------|-------|
| 5416 | 75.65 | 58.75 | 40.08 | 29.37 | 25.11 |
| 5418 | 75.59 | 58.72 | 40.08 | 29.38 | 25.12 |
| 5420 | 75.51 | 58.68 | 40.07 | 29.37 | 25.11 |
| 5422 | 75.45 | 58.64 | 40.04 | 29.34 | 25.09 |
| 5424 | 75.36 | 58.58 | 40.01 | 29.32 | 25.06 |
| 5426 | 75.28 | 58.52 | 39.97 | 29.3  | 25.05 |
| 5428 | 75.25 | 58.52 | 40.01 | 29.34 | 25.09 |
| 5430 | 75.19 | 58.49 | 40    | 29.34 | 25.09 |
| 5432 | 75.12 | 58.45 | 39.99 | 29.34 | 25.08 |
| 5434 | 75.03 | 58.39 | 39.96 | 29.31 | 25.07 |
| 5436 | 75.01 | 58.39 | 39.97 | 29.34 | 25.1  |
| 5438 | 74.94 | 58.36 | 39.98 | 29.34 | 25.12 |
| 5440 | 74.86 | 58.29 | 39.94 | 29.3  | 25.07 |
| 5442 | 74.8  | 58.27 | 39.93 | 29.29 | 25.07 |
| 5444 | 74.72 | 58.21 | 39.92 | 29.28 | 25.08 |
| 5446 | 74.64 | 58.18 | 39.89 | 29.27 | 25.07 |
| 5448 | 74.59 | 58.14 | 39.88 | 29.27 | 25.06 |
| 5450 | 74.51 | 58.1  | 39.87 | 29.26 | 25.03 |
| 5452 | 74.45 | 58.06 | 39.86 | 29.26 | 25.05 |
| 5454 | 74.39 | 58.02 | 39.85 | 29.25 | 25.04 |
| 5456 | 74.3  | 57.96 | 39.8  | 29.21 | 25.01 |
| 5458 | 74.22 | 57.92 | 39.79 | 29.22 | 25.02 |
| 5460 | 74.17 | 57.88 | 39.77 | 29.2  | 24.99 |
| 5462 | 74.13 | 57.87 | 39.79 | 29.22 | 25.01 |
| 5464 | 74.08 | 57.84 | 39.79 | 29.23 | 25.03 |
| 5466 | 74.01 | 57.8  | 39.78 | 29.22 | 25.03 |
| 5468 | 73.95 | 57.78 | 39.76 | 29.23 | 25.03 |
| 5470 | 73.85 | 57.7  | 39.72 | 29.17 | 24.97 |
| 5472 | 73.82 | 57.7  | 39.74 | 29.2  | 25.01 |
| 5474 | 73.75 | 57.65 | 39.72 | 29.19 | 25.01 |
| 5476 | 73.7  | 57.64 | 39.73 | 29.2  | 25.04 |
| 5478 | 73.62 | 57.59 | 39.7  | 29.17 | 25.01 |
| 5480 | 73.55 | 57.55 | 39.69 | 29.17 | 25    |
| 5482 | 73.51 | 57.51 | 39.68 | 29.16 | 25    |
| 5484 | 73.39 | 57.45 | 39.63 | 29.13 | 24.97 |
| 5486 | 73.37 | 57.44 | 39.64 | 29.14 | 24.99 |
| 5488 | 73.3  | 57.4  | 39.63 | 29.14 | 24.98 |
| 5490 | 73.24 | 57.37 | 39.63 | 29.14 | 24.99 |
| 5492 | 73.18 | 57.33 | 39.62 | 29.15 | 24.99 |
| 5494 | 73.1  | 57.28 | 39.59 | 29.12 | 24.97 |
| 5496 | 73.05 | 57.26 | 39.59 | 29.14 | 24.98 |
| 5498 | 72.99 | 57.23 | 39.59 | 29.13 | 24.98 |
| 5500 | 72.92 | 57.19 | 39.57 | 29.12 | 24.97 |
| 5502 | 72.82 | 57.11 | 39.51 | 29.07 | 24.92 |

|      |       |       |       |       |       |
|------|-------|-------|-------|-------|-------|
| 5504 | 72.8  | 57.11 | 39.54 | 29.11 | 24.96 |
| 5506 | 72.77 | 57.12 | 39.55 | 29.12 | 24.98 |
| 5508 | 72.68 | 57.06 | 39.53 | 29.1  | 24.96 |
| 5510 | 72.61 | 57.01 | 39.5  | 29.07 | 24.95 |
| 5512 | 72.56 | 56.98 | 39.5  | 29.08 | 24.95 |
| 5514 | 72.5  | 56.95 | 39.49 | 29.08 | 24.96 |
| 5516 | 72.45 | 56.94 | 39.5  | 29.11 | 24.99 |
| 5518 | 72.38 | 56.88 | 39.47 | 29.08 | 24.96 |
| 5520 | 72.34 | 56.86 | 39.47 | 29.1  | 24.98 |
| 5522 | 72.26 | 56.82 | 39.45 | 29.08 | 24.95 |
| 5524 | 72.18 | 56.75 | 39.42 | 29.04 | 24.92 |
| 5526 | 72.14 | 56.74 | 39.42 | 29.05 | 24.93 |
| 5528 | 72.06 | 56.69 | 39.39 | 29.03 | 24.91 |
| 5530 | 72.01 | 56.67 | 39.4  | 29.05 | 24.92 |
| 5532 | 71.95 | 56.63 | 39.39 | 29.05 | 24.93 |
| 5534 | 71.92 | 56.61 | 39.39 | 29.04 | 24.94 |
| 5536 | 71.85 | 56.57 | 39.37 | 29.03 | 24.93 |
| 5538 | 71.76 | 56.53 | 39.35 | 29.02 | 24.94 |
| 5540 | 71.7  | 56.49 | 39.34 | 29.03 | 24.93 |
| 5542 | 71.63 | 56.45 | 39.33 | 29.01 | 24.92 |
| 5544 | 71.57 | 56.39 | 39.29 | 28.98 | 24.89 |
| 5546 | 71.52 | 56.37 | 39.29 | 29    | 24.91 |
| 5548 | 71.44 | 56.33 | 39.27 | 28.97 | 24.89 |
| 5550 | 71.37 | 56.3  | 39.27 | 28.98 | 24.88 |
| 5552 | 71.35 | 56.29 | 39.27 | 28.99 | 24.89 |
| 5554 | 71.28 | 56.25 | 39.26 | 28.99 | 24.9  |
| 5556 | 71.22 | 56.21 | 39.25 | 28.98 | 24.9  |
| 5558 | 71.16 | 56.17 | 39.24 | 28.97 | 24.9  |
| 5560 | 71.09 | 56.13 | 39.22 | 28.96 | 24.87 |
| 5562 | 71.04 | 56.11 | 39.22 | 28.97 | 24.89 |
| 5564 | 70.98 | 56.07 | 39.2  | 28.96 | 24.89 |
| 5566 | 70.92 | 56.03 | 39.19 | 28.95 | 24.88 |
| 5568 | 70.85 | 56    | 39.18 | 28.93 | 24.88 |
| 5570 | 70.78 | 55.95 | 39.16 | 28.93 | 24.87 |
| 5572 | 70.72 | 55.91 | 39.16 | 28.92 | 24.87 |
| 5574 | 70.66 | 55.87 | 39.12 | 28.9  | 24.85 |
| 5576 | 70.62 | 55.85 | 39.12 | 28.9  | 24.86 |
| 5578 | 70.56 | 55.81 | 39.11 | 28.9  | 24.86 |
| 5580 | 70.5  | 55.77 | 39.11 | 28.9  | 24.86 |
| 5582 | 70.43 | 55.74 | 39.08 | 28.89 | 24.84 |
| 5584 | 70.4  | 55.73 | 39.09 | 28.91 | 24.86 |
| 5586 | 70.34 | 55.69 | 39.08 | 28.89 | 24.86 |
| 5588 | 70.27 | 55.66 | 39.07 | 28.89 | 24.85 |
| 5590 | 70.23 | 55.62 | 39.05 | 28.89 | 24.85 |

|      |       |       |       |       |       |
|------|-------|-------|-------|-------|-------|
| 5592 | 70.17 | 55.6  | 39.04 | 28.88 | 24.85 |
| 5594 | 70.09 | 55.56 | 39.03 | 28.88 | 24.84 |
| 5596 | 70.02 | 55.5  | 38.99 | 28.84 | 24.82 |
| 5598 | 69.97 | 55.48 | 39    | 28.85 | 24.84 |
| 5600 | 69.92 | 55.44 | 38.99 | 28.85 | 24.83 |
| 5602 | 69.85 | 55.4  | 38.98 | 28.85 | 24.82 |
| 5604 | 69.79 | 55.37 | 38.97 | 28.84 | 24.83 |
| 5606 | 69.75 | 55.36 | 38.98 | 28.85 | 24.84 |
| 5608 | 69.68 | 55.31 | 38.94 | 28.83 | 24.83 |
| 5610 | 69.62 | 55.28 | 38.93 | 28.83 | 24.81 |
| 5612 | 69.59 | 55.25 | 38.93 | 28.84 | 24.82 |
| 5614 | 69.51 | 55.21 | 38.91 | 28.83 | 24.81 |
| 5616 | 69.45 | 55.17 | 38.89 | 28.8  | 24.79 |
| 5618 | 69.39 | 55.14 | 38.88 | 28.81 | 24.8  |
| 5620 | 69.33 | 55.11 | 38.88 | 28.81 | 24.8  |
| 5622 | 69.25 | 55.04 | 38.83 | 28.77 | 24.76 |
| 5624 | 69.21 | 55.03 | 38.84 | 28.78 | 24.79 |
| 5626 | 69.13 | 54.99 | 38.82 | 28.75 | 24.78 |
| 5628 | 69.09 | 54.96 | 38.82 | 28.77 | 24.79 |
| 5630 | 69.02 | 54.92 | 38.79 | 28.76 | 24.77 |
| 5632 | 68.99 | 54.92 | 38.82 | 28.79 | 24.81 |
| 5634 | 68.94 | 54.89 | 38.8  | 28.77 | 24.79 |
| 5636 | 68.86 | 54.83 | 38.78 | 28.75 | 24.77 |
| 5638 | 68.8  | 54.81 | 38.75 | 28.74 | 24.77 |
| 5640 | 68.75 | 54.78 | 38.75 | 28.74 | 24.76 |
| 5642 | 68.69 | 54.72 | 38.75 | 28.75 | 24.77 |
| 5644 | 68.63 | 54.7  | 38.72 | 28.73 | 24.76 |
| 5646 | 68.59 | 54.67 | 38.72 | 28.73 | 24.76 |
| 5648 | 68.53 | 54.64 | 38.71 | 28.73 | 24.76 |
| 5650 | 68.46 | 54.61 | 38.7  | 28.73 | 24.75 |
| 5652 | 68.4  | 54.57 | 38.67 | 28.7  | 24.73 |
| 5654 | 68.35 | 54.54 | 38.66 | 28.7  | 24.74 |
| 5656 | 68.28 | 54.49 | 38.65 | 28.68 | 24.72 |
| 5658 | 68.24 | 54.47 | 38.65 | 28.69 | 24.73 |
| 5660 | 68.17 | 54.43 | 38.62 | 28.68 | 24.73 |
| 5662 | 68.12 | 54.4  | 38.61 | 28.67 | 24.72 |
| 5664 | 68.07 | 54.38 | 38.61 | 28.67 | 24.73 |
| 5666 | 68.04 | 54.35 | 38.6  | 28.68 | 24.73 |
| 5668 | 67.97 | 54.32 | 38.6  | 28.68 | 24.73 |
| 5670 | 67.92 | 54.29 | 38.59 | 28.67 | 24.73 |
| 5672 | 67.86 | 54.26 | 38.57 | 28.67 | 24.73 |
| 5674 | 67.78 | 54.21 | 38.55 | 28.65 | 24.71 |
| 5676 | 67.69 | 54.14 | 38.5  | 28.61 | 24.67 |
| 5678 | 67.67 | 54.14 | 38.52 | 28.63 | 24.68 |

|      |       |       |       |       |       |
|------|-------|-------|-------|-------|-------|
| 5680 | 67.61 | 54.12 | 38.52 | 28.64 | 24.7  |
| 5682 | 67.56 | 54.1  | 38.51 | 28.64 | 24.71 |
| 5684 | 67.49 | 54.04 | 38.48 | 28.61 | 24.71 |
| 5686 | 67.45 | 54.02 | 38.48 | 28.62 | 24.7  |
| 5688 | 67.4  | 54    | 38.48 | 28.61 | 24.7  |
| 5690 | 67.32 | 53.95 | 38.47 | 28.61 | 24.7  |
| 5692 | 67.28 | 53.92 | 38.44 | 28.6  | 24.69 |
| 5694 | 67.23 | 53.89 | 38.44 | 28.6  | 24.69 |
| 5696 | 67.16 | 53.86 | 38.42 | 28.59 | 24.67 |
| 5698 | 67.11 | 53.82 | 38.4  | 28.59 | 24.66 |
| 5700 | 67.06 | 53.79 | 38.4  | 28.59 | 24.67 |
| 5702 | 66.99 | 53.76 | 38.39 | 28.59 | 24.66 |
| 5704 | 66.96 | 53.74 | 38.39 | 28.59 | 24.68 |
| 5706 | 66.89 | 53.69 | 38.37 | 28.56 | 24.66 |
| 5708 | 66.83 | 53.65 | 38.34 | 28.54 | 24.63 |
| 5710 | 66.78 | 53.63 | 38.34 | 28.56 | 24.66 |
| 5712 | 66.74 | 53.61 | 38.34 | 28.56 | 24.67 |
| 5714 | 66.67 | 53.57 | 38.31 | 28.52 | 24.63 |
| 5716 | 66.63 | 53.53 | 38.3  | 28.53 | 24.64 |
| 5718 | 66.55 | 53.48 | 38.28 | 28.52 | 24.63 |
| 5720 | 66.52 | 53.48 | 38.29 | 28.54 | 24.66 |
| 5722 | 66.45 | 53.43 | 38.27 | 28.53 | 24.65 |
| 5724 | 66.38 | 53.39 | 38.25 | 28.49 | 24.63 |
| 5726 | 66.37 | 53.39 | 38.26 | 28.53 | 24.65 |
| 5728 | 66.31 | 53.36 | 38.25 | 28.52 | 24.64 |
| 5730 | 66.25 | 53.31 | 38.23 | 28.51 | 24.63 |
| 5732 | 66.17 | 53.26 | 38.21 | 28.5  | 24.62 |
| 5734 | 66.15 | 53.26 | 38.22 | 28.52 | 24.63 |
| 5736 | 66.12 | 53.24 | 38.22 | 28.51 | 24.64 |
| 5738 | 66.06 | 53.22 | 38.21 | 28.51 | 24.64 |
| 5740 | 65.99 | 53.17 | 38.19 | 28.49 | 24.61 |
| 5742 | 65.94 | 53.14 | 38.18 | 28.5  | 24.64 |
| 5744 | 65.9  | 53.12 | 38.18 | 28.48 | 24.64 |
| 5746 | 65.84 | 53.07 | 38.16 | 28.47 | 24.63 |
| 5748 | 65.79 | 53.05 | 38.15 | 28.47 | 24.63 |
| 5750 | 65.71 | 52.99 | 38.12 | 28.45 | 24.6  |
| 5752 | 65.66 | 52.97 | 38.12 | 28.45 | 24.61 |
| 5754 | 65.64 | 52.95 | 38.11 | 28.46 | 24.62 |
| 5756 | 65.56 | 52.9  | 38.08 | 28.45 | 24.6  |
| 5758 | 65.53 | 52.9  | 38.09 | 28.46 | 24.61 |
| 5760 | 65.49 | 52.87 | 38.09 | 28.46 | 24.61 |
| 5762 | 65.43 | 52.84 | 38.07 | 28.45 | 24.61 |
| 5764 | 65.37 | 52.81 | 38.07 | 28.45 | 24.61 |
| 5766 | 65.3  | 52.76 | 38.03 | 28.43 | 24.58 |



|      |       |       |       |       |       |
|------|-------|-------|-------|-------|-------|
| 5768 | 65.26 | 52.73 | 38.03 | 28.43 | 24.58 |
| 5770 | 65.2  | 52.71 | 38.03 | 28.42 | 24.58 |
| 5772 | 65.15 | 52.68 | 38.02 | 28.42 | 24.59 |
| 5774 | 65.11 | 52.66 | 38.02 | 28.42 | 24.6  |
| 5776 | 65.08 | 52.65 | 38.03 | 28.44 | 24.61 |
| 5778 | 65.03 | 52.62 | 38.01 | 28.43 | 24.6  |
| 5780 | 64.95 | 52.56 | 37.98 | 28.41 | 24.59 |
| 5782 | 64.89 | 52.52 | 37.96 | 28.4  | 24.58 |
| 5784 | 64.84 | 52.49 | 37.95 | 28.38 | 24.57 |
| 5786 | 64.82 | 52.49 | 37.96 | 28.41 | 24.6  |
| 5788 | 64.76 | 52.46 | 37.96 | 28.42 | 24.6  |
| 5790 | 64.7  | 52.4  | 37.93 | 28.39 | 24.56 |
| 5792 | 64.65 | 52.38 | 37.92 | 28.38 | 24.56 |
| 5794 | 64.6  | 52.36 | 37.92 | 28.39 | 24.57 |
| 5796 | 64.55 | 52.32 | 37.9  | 28.39 | 24.57 |
| 5798 | 64.49 | 52.29 | 37.88 | 28.37 | 24.54 |
| 5800 | 64.41 | 52.22 | 37.83 | 28.31 | 24.5  |
| 5802 | 64.38 | 52.22 | 37.85 | 28.34 | 24.55 |
| 5804 | 64.32 | 52.19 | 37.84 | 28.34 | 24.55 |
| 5806 | 64.29 | 52.18 | 37.85 | 28.35 | 24.56 |
| 5808 | 64.26 | 52.16 | 37.85 | 28.35 | 24.58 |
| 5810 | 64.2  | 52.13 | 37.83 | 28.35 | 24.57 |
| 5812 | 64.16 | 52.11 | 37.83 | 28.36 | 24.56 |
| 5814 | 64.09 | 52.05 | 37.79 | 28.33 | 24.54 |
| 5816 | 64.06 | 52.03 | 37.78 | 28.33 | 24.55 |
| 5818 | 64.02 | 52.01 | 37.79 | 28.35 | 24.54 |
| 5820 | 63.96 | 51.97 | 37.77 | 28.33 | 24.55 |
| 5822 | 63.91 | 51.96 | 37.78 | 28.34 | 24.55 |
| 5824 | 63.84 | 51.9  | 37.73 | 28.31 | 24.52 |
| 5826 | 63.8  | 51.88 | 37.74 | 28.32 | 24.53 |
| 5828 | 63.74 | 51.83 | 37.71 | 28.3  | 24.51 |
| 5830 | 63.68 | 51.81 | 37.7  | 28.29 | 24.51 |
| 5832 | 63.63 | 51.78 | 37.69 | 28.28 | 24.5  |
| 5834 | 63.57 | 51.75 | 37.68 | 28.27 | 24.5  |
| 5836 | 63.52 | 51.71 | 37.66 | 28.26 | 24.51 |
| 5838 | 63.47 | 51.68 | 37.65 | 28.26 | 24.5  |
| 5840 | 63.43 | 51.66 | 37.64 | 28.26 | 24.5  |
| 5842 | 63.37 | 51.64 | 37.65 | 28.26 | 24.51 |
| 5844 | 63.31 | 51.59 | 37.61 | 28.24 | 24.48 |
| 5846 | 63.27 | 51.57 | 37.61 | 28.24 | 24.49 |
| 5848 | 63.21 | 51.52 | 37.58 | 28.22 | 24.46 |
| 5850 | 63.16 | 51.5  | 37.57 | 28.23 | 24.48 |
| 5852 | 63.12 | 51.49 | 37.58 | 28.24 | 24.48 |
| 5854 | 63.06 | 51.45 | 37.56 | 28.22 | 24.47 |

|      |       |       |       |       |       |
|------|-------|-------|-------|-------|-------|
| 5856 | 63    | 51.41 | 37.54 | 28.22 | 24.47 |
| 5858 | 62.97 | 51.4  | 37.54 | 28.23 | 24.47 |
| 5860 | 62.92 | 51.37 | 37.53 | 28.21 | 24.45 |
| 5862 | 62.87 | 51.35 | 37.53 | 28.21 | 24.48 |
| 5864 | 62.78 | 51.28 | 37.48 | 28.17 | 24.44 |
| 5866 | 62.75 | 51.25 | 37.47 | 28.18 | 24.46 |
| 5868 | 62.71 | 51.23 | 37.47 | 28.17 | 24.44 |
| 5870 | 62.68 | 51.22 | 37.48 | 28.19 | 24.46 |
| 5872 | 62.59 | 51.16 | 37.42 | 28.14 | 24.42 |
| 5874 | 62.52 | 51.11 | 37.41 | 28.12 | 24.41 |
| 5876 | 62.49 | 51.1  | 37.41 | 28.13 | 24.42 |
| 5878 | 62.46 | 51.09 | 37.4  | 28.13 | 24.42 |
| 5880 | 62.41 | 51.06 | 37.39 | 28.13 | 24.41 |
| 5882 | 62.38 | 51.05 | 37.42 | 28.17 | 24.43 |
| 5884 | 62.32 | 51.01 | 37.39 | 28.14 | 24.42 |
| 5886 | 62.27 | 50.98 | 37.37 | 28.14 | 24.43 |
| 5888 | 62.24 | 50.96 | 37.38 | 28.15 | 24.43 |
| 5890 | 62.19 | 50.96 | 37.38 | 28.15 | 24.44 |
| 5892 | 62.1  | 50.86 | 37.31 | 28.09 | 24.38 |
| 5894 | 62.08 | 50.87 | 37.32 | 28.1  | 24.39 |
| 5896 | 62.03 | 50.85 | 37.33 | 28.11 | 24.41 |
| 5898 | 61.98 | 50.82 | 37.33 | 28.12 | 24.42 |
| 5900 | 61.95 | 50.78 | 37.29 | 28.09 | 24.4  |
| 5902 | 61.91 | 50.77 | 37.31 | 28.12 | 24.43 |
| 5904 | 61.86 | 50.75 | 37.3  | 28.11 | 24.42 |
| 5906 | 61.79 | 50.69 | 37.26 | 28.08 | 24.38 |
| 5908 | 61.78 | 50.69 | 37.28 | 28.11 | 24.41 |
| 5910 | 61.73 | 50.67 | 37.27 | 28.12 | 24.42 |
| 5912 | 61.66 | 50.62 | 37.25 | 28.09 | 24.4  |
| 5914 | 61.62 | 50.61 | 37.25 | 28.1  | 24.41 |
| 5916 | 61.59 | 50.58 | 37.24 | 28.09 | 24.4  |
| 5918 | 61.54 | 50.56 | 37.23 | 28.09 | 24.41 |
| 5920 | 61.49 | 50.53 | 37.22 | 28.09 | 24.41 |
| 5922 | 61.41 | 50.49 | 37.2  | 28.06 | 24.38 |
| 5924 | 61.37 | 50.45 | 37.19 | 28.06 | 24.39 |
| 5926 | 61.31 | 50.41 | 37.15 | 28.03 | 24.36 |
| 5928 | 61.29 | 50.4  | 37.16 | 28.05 | 24.39 |
| 5930 | 61.26 | 50.4  | 37.18 | 28.07 | 24.4  |
| 5932 | 61.2  | 50.36 | 37.16 | 28.05 | 24.4  |
| 5934 | 61.14 | 50.31 | 37.13 | 28.03 | 24.37 |
| 5936 | 61.09 | 50.29 | 37.13 | 28.03 | 24.38 |
| 5938 | 61.03 | 50.25 | 37.11 | 28.03 | 24.37 |
| 5940 | 60.99 | 50.22 | 37.09 | 28.02 | 24.37 |
| 5942 | 60.97 | 50.22 | 37.11 | 28.04 | 24.38 |

|      |       |       |       |       |       |
|------|-------|-------|-------|-------|-------|
| 5944 | 60.94 | 50.2  | 37.1  | 28.04 | 24.38 |
| 5946 | 60.88 | 50.17 | 37.09 | 28.03 | 24.37 |
| 5948 | 60.84 | 50.14 | 37.08 | 28.03 | 24.37 |
| 5950 | 60.78 | 50.11 | 37.07 | 28.01 | 24.34 |
| 5952 | 60.73 | 50.07 | 37.04 | 28.01 | 24.34 |
| 5954 | 60.7  | 50.05 | 37.04 | 28.02 | 24.36 |
| 5956 | 60.63 | 50.01 | 37.01 | 28    | 24.35 |
| 5958 | 60.59 | 49.98 | 37    | 27.98 | 24.33 |
| 5960 | 60.54 | 49.94 | 36.98 | 27.97 | 24.32 |
| 5962 | 60.5  | 49.93 | 37    | 27.98 | 24.35 |
| 5964 | 60.46 | 49.91 | 36.99 | 27.99 | 24.35 |
| 5966 | 60.4  | 49.87 | 36.97 | 27.96 | 24.34 |
| 5968 | 60.36 | 49.85 | 36.95 | 27.96 | 24.33 |
| 5970 | 60.33 | 49.83 | 36.96 | 27.98 | 24.35 |
| 5972 | 60.29 | 49.8  | 36.95 | 27.97 | 24.35 |
| 5974 | 60.24 | 49.78 | 36.94 | 27.97 | 24.34 |
| 5976 | 60.19 | 49.76 | 36.93 | 27.95 | 24.34 |
| 5978 | 60.14 | 49.72 | 36.91 | 27.95 | 24.34 |
| 5980 | 60.1  | 49.69 | 36.91 | 27.95 | 24.34 |
| 5982 | 60.05 | 49.67 | 36.9  | 27.94 | 24.33 |
| 5984 | 60.02 | 49.65 | 36.89 | 27.94 | 24.34 |
| 5986 | 59.94 | 49.6  | 36.86 | 27.92 | 24.31 |
| 5988 | 59.91 | 49.59 | 36.86 | 27.93 | 24.31 |
| 5990 | 59.89 | 49.57 | 36.85 | 27.93 | 24.31 |
| 5992 | 59.82 | 49.52 | 36.83 | 27.92 | 24.29 |
| 5994 | 59.76 | 49.5  | 36.81 | 27.91 | 24.29 |
| 5996 | 59.72 | 49.47 | 36.81 | 27.91 | 24.28 |
| 5998 | 59.67 | 49.43 | 36.79 | 27.9  | 24.27 |
| 6000 | 59.62 | 49.39 | 36.77 | 27.87 | 24.27 |
| 6002 | 59.54 | 49.34 | 36.74 | 27.85 | 24.24 |
| 6004 | 59.53 | 49.35 | 36.76 | 27.88 | 24.28 |
| 6006 | 59.46 | 49.3  | 36.73 | 27.85 | 24.24 |
| 6008 | 59.45 | 49.31 | 36.75 | 27.89 | 24.28 |
| 6010 | 59.43 | 49.3  | 36.76 | 27.9  | 24.3  |
| 6012 | 59.38 | 49.27 | 36.74 | 27.89 | 24.28 |
| 6014 | 59.31 | 49.21 | 36.7  | 27.85 | 24.27 |
| 6016 | 59.24 | 49.17 | 36.67 | 27.83 | 24.23 |
| 6018 | 59.22 | 49.15 | 36.7  | 27.86 | 24.27 |
| 6020 | 59.18 | 49.15 | 36.69 | 27.86 | 24.27 |
| 6022 | 59.1  | 49.08 | 36.64 | 27.82 | 24.23 |
| 6024 | 59.08 | 49.08 | 36.65 | 27.82 | 24.24 |
| 6026 | 59.06 | 49.07 | 36.66 | 27.84 | 24.25 |
| 6028 | 59    | 49.04 | 36.64 | 27.85 | 24.25 |
| 6030 | 58.94 | 49    | 36.62 | 27.83 | 24.24 |

|      |       |       |       |       |       |
|------|-------|-------|-------|-------|-------|
| 6032 | 58.89 | 48.98 | 36.61 | 27.82 | 24.24 |
| 6034 | 58.87 | 48.97 | 36.62 | 27.82 | 24.25 |
| 6036 | 58.77 | 48.88 | 36.54 | 27.76 | 24.19 |
| 6038 | 58.73 | 48.85 | 36.54 | 27.77 | 24.18 |
| 6040 | 58.7  | 48.84 | 36.54 | 27.77 | 24.19 |
| 6042 | 58.64 | 48.81 | 36.53 | 27.77 | 24.2  |
| 6044 | 58.6  | 48.79 | 36.52 | 27.76 | 24.19 |
| 6046 | 58.56 | 48.76 | 36.51 | 27.75 | 24.19 |
| 6048 | 58.46 | 48.68 | 36.45 | 27.69 | 24.13 |
| 6050 | 58.45 | 48.69 | 36.48 | 27.73 | 24.17 |
| 6052 | 58.42 | 48.68 | 36.48 | 27.74 | 24.18 |
| 6054 | 58.38 | 48.65 | 36.47 | 27.73 | 24.18 |
| 6056 | 58.34 | 48.62 | 36.46 | 27.73 | 24.18 |
| 6058 | 58.29 | 48.6  | 36.44 | 27.72 | 24.17 |
| 6060 | 58.26 | 48.58 | 36.45 | 27.73 | 24.19 |
| 6062 | 58.21 | 48.54 | 36.42 | 27.71 | 24.17 |
| 6064 | 58.17 | 48.53 | 36.42 | 27.72 | 24.18 |
| 6066 | 58.15 | 48.51 | 36.41 | 27.71 | 24.19 |
| 6068 | 58.09 | 48.49 | 36.41 | 27.72 | 24.19 |
| 6070 | 58.04 | 48.45 | 36.4  | 27.69 | 24.17 |
| 6072 | 58    | 48.43 | 36.38 | 27.7  | 24.18 |
| 6074 | 57.94 | 48.38 | 36.37 | 27.69 | 24.16 |
| 6076 | 57.93 | 48.39 | 36.39 | 27.72 | 24.18 |
| 6078 | 57.88 | 48.35 | 36.37 | 27.7  | 24.19 |
| 6080 | 57.85 | 48.34 | 36.36 | 27.71 | 24.17 |
| 6082 | 57.79 | 48.3  | 36.33 | 27.68 | 24.16 |
| 6084 | 57.78 | 48.3  | 36.35 | 27.7  | 24.18 |
| 6086 | 57.71 | 48.25 | 36.31 | 27.67 | 24.16 |
| 6088 | 57.66 | 48.21 | 36.29 | 27.66 | 24.14 |
| 6090 | 57.65 | 48.22 | 36.32 | 27.67 | 24.17 |
| 6092 | 57.6  | 48.19 | 36.3  | 27.69 | 24.18 |
| 6094 | 57.53 | 48.14 | 36.28 | 27.66 | 24.15 |
| 6096 | 57.54 | 48.17 | 36.32 | 27.71 | 24.19 |
| 6098 | 57.48 | 48.15 | 36.31 | 27.71 | 24.19 |
| 6100 | 57.47 | 48.12 | 36.3  | 27.7  | 24.18 |
| 6102 | 57.41 | 48.07 | 36.26 | 27.67 | 24.16 |
| 6104 | 57.37 | 48.07 | 36.27 | 27.69 | 24.17 |
| 6106 | 57.31 | 48.02 | 36.24 | 27.66 | 24.16 |
| 6108 | 57.31 | 48.02 | 36.26 | 27.69 | 24.18 |
| 6110 | 57.25 | 47.99 | 36.25 | 27.68 | 24.17 |
| 6112 | 57.21 | 47.96 | 36.23 | 27.65 | 24.14 |
| 6114 | 57.14 | 47.93 | 36.2  | 27.64 | 24.15 |
| 6116 | 57.09 | 47.85 | 36.17 | 27.61 | 24.12 |
| 6118 | 57.04 | 47.83 | 36.14 | 27.6  | 24.11 |

|      |       |       |       |       |       |
|------|-------|-------|-------|-------|-------|
| 6120 | 57.02 | 47.84 | 36.18 | 27.64 | 24.15 |
| 6122 | 57    | 47.84 | 36.18 | 27.64 | 24.16 |
| 6124 | 56.96 | 47.81 | 36.17 | 27.63 | 24.16 |
| 6126 | 56.89 | 47.75 | 36.13 | 27.6  | 24.11 |
| 6128 | 56.86 | 47.74 | 36.12 | 27.6  | 24.11 |
| 6130 | 56.8  | 47.72 | 36.13 | 27.61 | 24.12 |
| 6132 | 56.76 | 47.68 | 36.09 | 27.59 | 24.1  |
| 6134 | 56.71 | 47.65 | 36.07 | 27.59 | 24.1  |
| 6136 | 56.7  | 47.64 | 36.08 | 27.59 | 24.12 |
| 6138 | 56.7  | 47.66 | 36.12 | 27.63 | 24.15 |
| 6140 | 56.65 | 47.64 | 36.1  | 27.61 | 24.13 |
| 6142 | 56.6  | 47.6  | 36.09 | 27.61 | 24.13 |
| 6144 | 56.55 | 47.57 | 36.07 | 27.6  | 24.13 |
| 6146 | 56.48 | 47.53 | 36.03 | 27.56 | 24.09 |
| 6148 | 56.42 | 47.49 | 36.02 | 27.56 | 24.08 |
| 6150 | 56.43 | 47.51 | 36.06 | 27.6  | 24.13 |
| 6152 | 56.38 | 47.48 | 36.03 | 27.58 | 24.11 |
| 6154 | 56.31 | 47.44 | 36    | 27.56 | 24.11 |
| 6156 | 56.3  | 47.43 | 36.01 | 27.56 | 24.11 |
| 6158 | 56.28 | 47.43 | 36.02 | 27.59 | 24.12 |
| 6160 | 56.23 | 47.39 | 36    | 27.57 | 24.12 |
| 6162 | 56.15 | 47.32 | 35.95 | 27.53 | 24.08 |
| 6164 | 56.15 | 47.34 | 35.98 | 27.57 | 24.11 |
| 6166 | 56.09 | 47.3  | 35.95 | 27.55 | 24.1  |
| 6168 | 56.02 | 47.25 | 35.92 | 27.53 | 24.06 |
| 6170 | 55.98 | 47.23 | 35.91 | 27.52 | 24.05 |
| 6172 | 55.99 | 47.25 | 35.93 | 27.56 | 24.09 |
| 6174 | 55.92 | 47.19 | 35.9  | 27.52 | 24.08 |
| 6176 | 55.9  | 47.2  | 35.92 | 27.53 | 24.09 |
| 6178 | 55.87 | 47.18 | 35.92 | 27.55 | 24.1  |
| 6180 | 55.82 | 47.15 | 35.9  | 27.54 | 24.1  |
| 6182 | 55.79 | 47.14 | 35.91 | 27.54 | 24.11 |
| 6184 | 55.76 | 47.11 | 35.9  | 27.53 | 24.11 |
| 6186 | 55.7  | 47.08 | 35.87 | 27.51 | 24.09 |
| 6188 | 55.62 | 47.02 | 35.82 | 27.47 | 24.05 |
| 6190 | 55.58 | 47    | 35.82 | 27.48 | 24.05 |
| 6192 | 55.59 | 47.02 | 35.86 | 27.52 | 24.09 |
| 6194 | 55.52 | 46.96 | 35.81 | 27.48 | 24.04 |
| 6196 | 55.51 | 46.97 | 35.83 | 27.51 | 24.06 |
| 6198 | 55.49 | 46.96 | 35.83 | 27.52 | 24.09 |
| 6200 | 55.44 | 46.93 | 35.83 | 27.52 | 24.09 |
| 6202 | 55.35 | 46.86 | 35.76 | 27.46 | 24.03 |
| 6204 | 55.32 | 46.83 | 35.75 | 27.46 | 24.03 |
| 6206 | 55.3  | 46.84 | 35.77 | 27.49 | 24.05 |

|      |       |       |       |       |       |
|------|-------|-------|-------|-------|-------|
| 6208 | 55.23 | 46.79 | 35.73 | 27.45 | 24.02 |
| 6210 | 55.18 | 46.75 | 35.71 | 27.44 | 24.01 |
| 6212 | 55.18 | 46.76 | 35.75 | 27.46 | 24.04 |
| 6214 | 55.1  | 46.71 | 35.7  | 27.43 | 24.01 |
| 6216 | 55.09 | 46.71 | 35.71 | 27.44 | 24.03 |
| 6218 | 55.06 | 46.69 | 35.71 | 27.43 | 24.03 |
| 6220 | 55.02 | 46.68 | 35.71 | 27.47 | 24.05 |
| 6222 | 54.98 | 46.64 | 35.69 | 27.44 | 24.03 |
| 6224 | 54.92 | 46.59 | 35.66 | 27.41 | 24.01 |
| 6226 | 54.92 | 46.6  | 35.69 | 27.45 | 24.06 |
| 6228 | 54.89 | 46.59 | 35.68 | 27.46 | 24.06 |
| 6230 | 54.83 | 46.54 | 35.65 | 27.43 | 24.02 |
| 6232 | 54.78 | 46.52 | 35.64 | 27.42 | 24    |
| 6234 | 54.72 | 46.47 | 35.6  | 27.39 | 23.99 |
| 6236 | 54.69 | 46.46 | 35.6  | 27.4  | 24    |
| 6238 | 54.66 | 46.43 | 35.59 | 27.41 | 24    |
| 6240 | 54.64 | 46.43 | 35.6  | 27.43 | 24.03 |
| 6242 | 54.59 | 46.42 | 35.6  | 27.42 | 24.02 |
| 6244 | 54.55 | 46.39 | 35.59 | 27.39 | 24.01 |
| 6246 | 54.51 | 46.35 | 35.57 | 27.38 | 24    |
| 6248 | 54.43 | 46.28 | 35.51 | 27.33 | 23.97 |
| 6250 | 54.41 | 46.27 | 35.52 | 27.35 | 23.97 |
| 6252 | 54.36 | 46.24 | 35.51 | 27.35 | 23.97 |
| 6254 | 54.35 | 46.24 | 35.51 | 27.35 | 23.97 |
| 6256 | 54.29 | 46.2  | 35.49 | 27.33 | 23.96 |
| 6258 | 54.28 | 46.2  | 35.5  | 27.36 | 23.98 |
| 6260 | 54.26 | 46.19 | 35.5  | 27.38 | 24    |
| 6262 | 54.21 | 46.16 | 35.5  | 27.37 | 23.98 |
| 6264 | 54.18 | 46.14 | 35.49 | 27.36 | 23.98 |
| 6266 | 54.16 | 46.14 | 35.49 | 27.37 | 24    |
| 6268 | 54.09 | 46.08 | 35.45 | 27.33 | 23.96 |
| 6270 | 54.08 | 46.09 | 35.47 | 27.37 | 23.99 |
| 6272 | 54.05 | 46.08 | 35.47 | 27.37 | 24    |
| 6274 | 54    | 46.04 | 35.45 | 27.36 | 23.98 |
| 6276 | 53.94 | 45.99 | 35.42 | 27.33 | 23.97 |
| 6278 | 53.93 | 45.99 | 35.43 | 27.34 | 23.98 |
| 6280 | 53.91 | 46    | 35.43 | 27.35 | 23.99 |
| 6282 | 53.86 | 45.96 | 35.41 | 27.35 | 23.99 |
| 6284 | 53.84 | 45.95 | 35.43 | 27.36 | 24    |
| 6286 | 53.8  | 45.93 | 35.41 | 27.34 | 23.99 |
| 6288 | 53.76 | 45.9  | 35.42 | 27.35 | 24    |
| 6290 | 53.71 | 45.86 | 35.38 | 27.32 | 23.97 |
| 6292 | 53.67 | 45.84 | 35.37 | 27.31 | 23.94 |
| 6294 | 53.64 | 45.82 | 35.36 | 27.31 | 23.97 |

|      |       |       |       |       |       |
|------|-------|-------|-------|-------|-------|
| 6296 | 53.6  | 45.8  | 35.35 | 27.31 | 23.96 |
| 6298 | 53.53 | 45.75 | 35.31 | 27.28 | 23.93 |
| 6300 | 53.5  | 45.73 | 35.3  | 27.28 | 23.93 |
| 6302 | 53.47 | 45.73 | 35.33 | 27.31 | 23.96 |
| 6304 | 53.41 | 45.67 | 35.27 | 27.27 | 23.92 |
| 6306 | 53.4  | 45.69 | 35.31 | 27.3  | 23.95 |
| 6308 | 53.39 | 45.68 | 35.31 | 27.31 | 23.97 |
| 6310 | 53.35 | 45.65 | 35.29 | 27.3  | 23.96 |
| 6312 | 53.27 | 45.58 | 35.24 | 27.26 | 23.93 |
| 6314 | 53.24 | 45.57 | 35.25 | 27.27 | 23.93 |
| 6316 | 53.22 | 45.57 | 35.26 | 27.28 | 23.93 |
| 6318 | 53.21 | 45.57 | 35.26 | 27.3  | 23.97 |
| 6320 | 53.18 | 45.55 | 35.25 | 27.28 | 23.97 |
| 6322 | 53.13 | 45.52 | 35.24 | 27.28 | 23.97 |
| 6324 | 53.08 | 45.49 | 35.23 | 27.27 | 23.96 |
| 6326 | 53.06 | 45.48 | 35.23 | 27.28 | 23.96 |
| 6328 | 53    | 45.43 | 35.19 | 27.25 | 23.94 |
| 6330 | 52.95 | 45.41 | 35.19 | 27.25 | 23.94 |
| 6332 | 52.93 | 45.4  | 35.19 | 27.24 | 23.94 |
| 6334 | 52.86 | 45.34 | 35.14 | 27.21 | 23.91 |
| 6336 | 52.82 | 45.32 | 35.14 | 27.21 | 23.9  |
| 6338 | 52.79 | 45.3  | 35.13 | 27.21 | 23.9  |
| 6340 | 52.77 | 45.28 | 35.14 | 27.22 | 23.91 |
| 6342 | 52.76 | 45.28 | 35.14 | 27.23 | 23.92 |
| 6344 | 52.7  | 45.24 | 35.12 | 27.22 | 23.91 |
| 6346 | 52.66 | 45.24 | 35.1  | 27.2  | 23.89 |
| 6348 | 52.65 | 45.23 | 35.12 | 27.23 | 23.91 |
| 6350 | 52.62 | 45.21 | 35.12 | 27.22 | 23.92 |
| 6352 | 52.6  | 45.2  | 35.12 | 27.23 | 23.93 |
| 6354 | 52.53 | 45.16 | 35.09 | 27.21 | 23.93 |
| 6356 | 52.48 | 45.13 | 35.07 | 27.21 | 23.91 |
| 6358 | 52.42 | 45.08 | 35.03 | 27.16 | 23.87 |
| 6360 | 52.38 | 45.04 | 35.01 | 27.15 | 23.87 |
| 6362 | 52.34 | 45.02 | 35.01 | 27.15 | 23.87 |
| 6364 | 52.33 | 45.02 | 35.01 | 27.16 | 23.87 |
| 6366 | 52.27 | 44.98 | 34.99 | 27.14 | 23.86 |
| 6368 | 52.24 | 44.96 | 34.98 | 27.14 | 23.86 |
| 6370 | 52.19 | 44.92 | 34.95 | 27.13 | 23.85 |
| 6372 | 52.17 | 44.9  | 34.95 | 27.12 | 23.84 |
| 6374 | 52.15 | 44.9  | 34.96 | 27.13 | 23.86 |
| 6376 | 52.12 | 44.88 | 34.95 | 27.14 | 23.85 |
| 6378 | 52.07 | 44.85 | 34.93 | 27.12 | 23.84 |
| 6380 | 52.03 | 44.83 | 34.92 | 27.12 | 23.84 |
| 6382 | 52    | 44.8  | 34.91 | 27.11 | 23.84 |

|      |       |       |       |       |       |
|------|-------|-------|-------|-------|-------|
| 6384 | 51.97 | 44.79 | 34.91 | 27.12 | 23.85 |
| 6386 | 51.93 | 44.77 | 34.91 | 27.12 | 23.84 |
| 6388 | 51.9  | 44.75 | 34.89 | 27.1  | 23.84 |
| 6390 | 51.86 | 44.72 | 34.88 | 27.1  | 23.84 |
| 6392 | 51.82 | 44.7  | 34.87 | 27.09 | 23.84 |
| 6394 | 51.79 | 44.68 | 34.87 | 27.09 | 23.84 |
| 6396 | 51.76 | 44.66 | 34.86 | 27.09 | 23.84 |
| 6398 | 51.73 | 44.64 | 34.85 | 27.08 | 23.83 |
| 6400 | 51.71 | 44.64 | 34.86 | 27.11 | 23.85 |
| 6402 | 51.67 | 44.61 | 34.83 | 27.09 | 23.83 |
| 6404 | 51.66 | 44.61 | 34.85 | 27.11 | 23.86 |
| 6406 | 51.62 | 44.58 | 34.83 | 27.1  | 23.83 |
| 6408 | 51.59 | 44.56 | 34.83 | 27.11 | 23.84 |
| 6410 | 51.56 | 44.56 | 34.83 | 27.11 | 23.86 |
| 6412 | 51.51 | 44.51 | 34.81 | 27.09 | 23.84 |
| 6414 | 51.47 | 44.48 | 34.78 | 27.07 | 23.82 |
| 6416 | 51.44 | 44.47 | 34.79 | 27.08 | 23.84 |
| 6418 | 51.39 | 44.43 | 34.79 | 27.08 | 23.83 |
| 6420 | 51.37 | 44.43 | 34.77 | 27.07 | 23.83 |
| 6422 | 51.32 | 44.39 | 34.75 | 27.05 | 23.82 |
| 6424 | 51.28 | 44.37 | 34.74 | 27.04 | 23.81 |
| 6426 | 51.24 | 44.34 | 34.72 | 27.03 | 23.81 |
| 6428 | 51.25 | 44.35 | 34.74 | 27.06 | 23.82 |
| 6430 | 51.19 | 44.31 | 34.71 | 27.04 | 23.81 |
| 6432 | 51.17 | 44.3  | 34.71 | 27.04 | 23.8  |
| 6434 | 51.15 | 44.31 | 34.73 | 27.06 | 23.83 |
| 6436 | 51.11 | 44.26 | 34.7  | 27.04 | 23.82 |
| 6438 | 51.08 | 44.25 | 34.69 | 27.04 | 23.82 |
| 6440 | 51.03 | 44.2  | 34.68 | 27.04 | 23.81 |
| 6442 | 51.02 | 44.22 | 34.69 | 27.05 | 23.82 |
| 6444 | 50.97 | 44.17 | 34.65 | 27.03 | 23.8  |
| 6446 | 50.95 | 44.17 | 34.66 | 27.04 | 23.81 |
| 6448 | 50.92 | 44.15 | 34.66 | 27.03 | 23.8  |
| 6450 | 50.86 | 44.11 | 34.62 | 27.01 | 23.78 |
| 6452 | 50.87 | 44.14 | 34.66 | 27.05 | 23.82 |
| 6454 | 50.85 | 44.13 | 34.67 | 27.06 | 23.84 |
| 6456 | 50.82 | 44.1  | 34.66 | 27.05 | 23.84 |
| 6458 | 50.77 | 44.06 | 34.63 | 27.03 | 23.81 |
| 6460 | 50.75 | 44.06 | 34.65 | 27.05 | 23.83 |
| 6462 | 50.68 | 44.01 | 34.6  | 27.02 | 23.8  |
| 6464 | 50.67 | 44.01 | 34.61 | 27.03 | 23.8  |
| 6466 | 50.59 | 43.94 | 34.55 | 26.99 | 23.77 |
| 6468 | 50.57 | 43.92 | 34.55 | 26.98 | 23.76 |
| 6470 | 50.53 | 43.9  | 34.53 | 26.97 | 23.76 |



|      |       |       |       |       |       |
|------|-------|-------|-------|-------|-------|
| 6472 | 50.51 | 43.9  | 34.54 | 26.98 | 23.77 |
| 6474 | 50.46 | 43.86 | 34.53 | 26.96 | 23.76 |
| 6476 | 50.43 | 43.84 | 34.51 | 26.97 | 23.75 |
| 6478 | 50.4  | 43.82 | 34.51 | 26.97 | 23.76 |
| 6480 | 50.38 | 43.81 | 34.51 | 26.98 | 23.76 |
| 6482 | 50.34 | 43.8  | 34.52 | 26.98 | 23.77 |
| 6484 | 50.29 | 43.76 | 34.48 | 26.95 | 23.75 |
| 6486 | 50.26 | 43.75 | 34.48 | 26.95 | 23.76 |
| 6488 | 50.26 | 43.75 | 34.48 | 26.96 | 23.78 |
| 6490 | 50.22 | 43.74 | 34.5  | 26.97 | 23.79 |
| 6492 | 50.16 | 43.68 | 34.45 | 26.93 | 23.77 |
| 6494 | 50.14 | 43.67 | 34.45 | 26.94 | 23.77 |
| 6496 | 50.1  | 43.65 | 34.44 | 26.94 | 23.75 |
| 6498 | 50.05 | 43.61 | 34.41 | 26.91 | 23.73 |
| 6500 | 50.02 | 43.59 | 34.4  | 26.91 | 23.74 |
| 6502 | 49.97 | 43.55 | 34.37 | 26.88 | 23.71 |
| 6504 | 49.96 | 43.55 | 34.38 | 26.9  | 23.73 |
| 6506 | 49.93 | 43.53 | 34.38 | 26.9  | 23.73 |
| 6508 | 49.87 | 43.48 | 34.33 | 26.87 | 23.7  |
| 6510 | 49.84 | 43.48 | 34.34 | 26.88 | 23.69 |
| 6512 | 49.84 | 43.48 | 34.35 | 26.9  | 23.72 |
| 6514 | 49.81 | 43.46 | 34.35 | 26.91 | 23.73 |
| 6516 | 49.75 | 43.42 | 34.32 | 26.89 | 23.71 |
| 6518 | 49.71 | 43.39 | 34.3  | 26.87 | 23.7  |
| 6520 | 49.73 | 43.41 | 34.34 | 26.9  | 23.74 |
| 6522 | 49.68 | 43.39 | 34.32 | 26.89 | 23.72 |
| 6524 | 49.66 | 43.38 | 34.31 | 26.89 | 23.72 |
| 6526 | 49.64 | 43.36 | 34.32 | 26.9  | 23.74 |
| 6528 | 49.58 | 43.32 | 34.29 | 26.87 | 23.72 |
| 6530 | 49.54 | 43.3  | 34.28 | 26.86 | 23.71 |
| 6532 | 49.51 | 43.28 | 34.28 | 26.86 | 23.71 |
| 6534 | 49.48 | 43.27 | 34.27 | 26.86 | 23.71 |
| 6536 | 49.45 | 43.24 | 34.26 | 26.85 | 23.7  |
| 6538 | 49.4  | 43.21 | 34.25 | 26.85 | 23.7  |
| 6540 | 49.39 | 43.21 | 34.25 | 26.86 | 23.72 |
| 6542 | 49.35 | 43.18 | 34.23 | 26.84 | 23.7  |
| 6544 | 49.32 | 43.17 | 34.23 | 26.84 | 23.7  |
| 6546 | 49.34 | 43.17 | 34.24 | 26.87 | 23.72 |
| 6548 | 49.29 | 43.15 | 34.22 | 26.85 | 23.7  |
| 6550 | 49.24 | 43.12 | 34.21 | 26.85 | 23.7  |
| 6552 | 49.21 | 43.1  | 34.2  | 26.85 | 23.69 |
| 6554 | 49.18 | 43.07 | 34.19 | 26.84 | 23.69 |
| 6556 | 49.15 | 43.06 | 34.18 | 26.83 | 23.69 |
| 6558 | 49.12 | 43.04 | 34.17 | 26.83 | 23.69 |

|      |       |       |       |       |       |
|------|-------|-------|-------|-------|-------|
| 6560 | 49.08 | 43.02 | 34.16 | 26.83 | 23.69 |
| 6562 | 49.07 | 43.01 | 34.17 | 26.85 | 23.71 |
| 6564 | 49.05 | 43.01 | 34.19 | 26.86 | 23.72 |
| 6566 | 49.01 | 43    | 34.18 | 26.86 | 23.72 |
| 6568 | 48.98 | 42.96 | 34.15 | 26.84 | 23.7  |
| 6570 | 48.96 | 42.96 | 34.15 | 26.84 | 23.7  |
| 6572 | 48.9  | 42.91 | 34.12 | 26.82 | 23.68 |
| 6574 | 48.87 | 42.89 | 34.1  | 26.81 | 23.67 |
| 6576 | 48.84 | 42.87 | 34.09 | 26.8  | 23.67 |
| 6578 | 48.8  | 42.84 | 34.09 | 26.8  | 23.66 |
| 6580 | 48.77 | 42.83 | 34.08 | 26.79 | 23.67 |
| 6582 | 48.74 | 42.8  | 34.08 | 26.79 | 23.67 |
| 6584 | 48.72 | 42.79 | 34.06 | 26.79 | 23.66 |
| 6586 | 48.67 | 42.76 | 34.06 | 26.79 | 23.66 |
| 6588 | 48.67 | 42.77 | 34.07 | 26.8  | 23.68 |
| 6590 | 48.62 | 42.73 | 34.04 | 26.77 | 23.67 |
| 6592 | 48.58 | 42.7  | 34.03 | 26.76 | 23.67 |
| 6594 | 48.55 | 42.69 | 34.02 | 26.76 | 23.67 |
| 6596 | 48.54 | 42.69 | 34.03 | 26.78 | 23.67 |
| 6598 | 48.49 | 42.66 | 34.01 | 26.76 | 23.66 |
| 6600 | 48.45 | 42.61 | 33.98 | 26.75 | 23.65 |
| 6602 | 48.41 | 42.6  | 33.98 | 26.74 | 23.64 |
| 6604 | 48.39 | 42.59 | 33.96 | 26.74 | 23.65 |
| 6606 | 48.33 | 42.54 | 33.93 | 26.7  | 23.61 |
| 6608 | 48.33 | 42.55 | 33.95 | 26.73 | 23.64 |
| 6610 | 48.29 | 42.53 | 33.95 | 26.73 | 23.64 |
| 6612 | 48.27 | 42.52 | 33.94 | 26.73 | 23.64 |
| 6614 | 48.24 | 42.49 | 33.94 | 26.72 | 23.64 |
| 6616 | 48.21 | 42.48 | 33.92 | 26.72 | 23.64 |
| 6618 | 48.18 | 42.46 | 33.92 | 26.72 | 23.63 |
| 6620 | 48.15 | 42.44 | 33.9  | 26.72 | 23.63 |
| 6622 | 48.12 | 42.42 | 33.9  | 26.72 | 23.63 |
| 6624 | 48.09 | 42.4  | 33.88 | 26.71 | 23.63 |
| 6626 | 48.03 | 42.36 | 33.85 | 26.67 | 23.61 |
| 6628 | 48.02 | 42.35 | 33.85 | 26.68 | 23.61 |
| 6630 | 47.95 | 42.31 | 33.83 | 26.67 | 23.59 |
| 6632 | 47.94 | 42.3  | 33.82 | 26.68 | 23.6  |
| 6634 | 47.9  | 42.27 | 33.82 | 26.67 | 23.58 |
| 6636 | 47.89 | 42.28 | 33.82 | 26.67 | 23.59 |
| 6638 | 47.86 | 42.25 | 33.8  | 26.65 | 23.56 |
| 6640 | 47.85 | 42.25 | 33.82 | 26.68 | 23.6  |
| 6642 | 47.79 | 42.2  | 33.79 | 26.65 | 23.57 |
| 6644 | 47.77 | 42.18 | 33.77 | 26.63 | 23.55 |
| 6646 | 47.75 | 42.19 | 33.79 | 26.66 | 23.58 |

|      |       |       |       |       |       |
|------|-------|-------|-------|-------|-------|
| 6648 | 47.72 | 42.17 | 33.77 | 26.66 | 23.6  |
| 6650 | 47.68 | 42.13 | 33.75 | 26.64 | 23.58 |
| 6652 | 47.67 | 42.13 | 33.76 | 26.65 | 23.58 |
| 6654 | 47.65 | 42.13 | 33.77 | 26.67 | 23.6  |
| 6656 | 47.65 | 42.12 | 33.77 | 26.68 | 23.61 |
| 6658 | 47.6  | 42.1  | 33.75 | 26.67 | 23.59 |
| 6660 | 47.58 | 42.08 | 33.75 | 26.67 | 23.59 |
| 6662 | 47.55 | 42.07 | 33.74 | 26.66 | 23.6  |
| 6664 | 47.52 | 42.05 | 33.73 | 26.66 | 23.59 |
| 6666 | 47.49 | 42.02 | 33.73 | 26.66 | 23.59 |
| 6668 | 47.48 | 42.04 | 33.74 | 26.68 | 23.6  |
| 6670 | 47.43 | 41.99 | 33.72 | 26.66 | 23.6  |
| 6672 | 47.44 | 42.01 | 33.75 | 26.69 | 23.63 |
| 6674 | 47.4  | 41.97 | 33.71 | 26.66 | 23.61 |
| 6676 | 47.34 | 41.93 | 33.68 | 26.62 | 23.59 |
| 6678 | 47.29 | 41.9  | 33.66 | 26.62 | 23.58 |
| 6680 | 47.28 | 41.89 | 33.66 | 26.62 | 23.58 |
| 6682 | 47.26 | 41.87 | 33.66 | 26.62 | 23.59 |
| 6684 | 47.23 | 41.85 | 33.64 | 26.62 | 23.58 |
| 6686 | 47.19 | 41.84 | 33.64 | 26.61 | 23.57 |
| 6688 | 47.17 | 41.82 | 33.63 | 26.59 | 23.56 |
| 6690 | 47.14 | 41.81 | 33.63 | 26.61 | 23.57 |
| 6692 | 47.11 | 41.79 | 33.6  | 26.59 | 23.55 |
| 6694 | 47.09 | 41.77 | 33.61 | 26.61 | 23.56 |
| 6696 | 47.07 | 41.77 | 33.61 | 26.61 | 23.57 |
| 6698 | 47.04 | 41.74 | 33.6  | 26.61 | 23.56 |
| 6700 | 47.01 | 41.73 | 33.59 | 26.6  | 23.57 |
| 6702 | 46.99 | 41.71 | 33.58 | 26.61 | 23.56 |
| 6704 | 46.96 | 41.69 | 33.57 | 26.61 | 23.57 |
| 6706 | 46.98 | 41.74 | 33.62 | 26.66 | 23.62 |
| 6708 | 46.9  | 41.66 | 33.58 | 26.61 | 23.57 |
| 6710 | 46.89 | 41.65 | 33.57 | 26.61 | 23.59 |
| 6712 | 46.85 | 41.62 | 33.55 | 26.59 | 23.56 |
| 6714 | 46.82 | 41.61 | 33.53 | 26.59 | 23.56 |
| 6716 | 46.79 | 41.59 | 33.52 | 26.58 | 23.56 |
| 6718 | 46.77 | 41.57 | 33.52 | 26.58 | 23.55 |
| 6720 | 46.74 | 41.55 | 33.51 | 26.57 | 23.56 |
| 6722 | 46.71 | 41.54 | 33.5  | 26.57 | 23.55 |
| 6724 | 46.68 | 41.51 | 33.49 | 26.57 | 23.55 |
| 6726 | 46.64 | 41.49 | 33.48 | 26.55 | 23.53 |
| 6728 | 46.63 | 41.48 | 33.48 | 26.56 | 23.54 |
| 6730 | 46.58 | 41.46 | 33.46 | 26.55 | 23.53 |
| 6732 | 46.57 | 41.45 | 33.46 | 26.56 | 23.54 |
| 6734 | 46.54 | 41.43 | 33.45 | 26.56 | 23.55 |

|      |       |       |       |       |       |
|------|-------|-------|-------|-------|-------|
| 6736 | 46.51 | 41.42 | 33.45 | 26.55 | 23.54 |
| 6738 | 46.46 | 41.39 | 33.42 | 26.52 | 23.51 |
| 6740 | 46.42 | 41.35 | 33.4  | 26.51 | 23.49 |
| 6742 | 46.42 | 41.36 | 33.43 | 26.54 | 23.54 |
| 6744 | 46.4  | 41.34 | 33.42 | 26.54 | 23.54 |
| 6746 | 46.39 | 41.34 | 33.42 | 26.55 | 23.56 |
| 6748 | 46.35 | 41.31 | 33.41 | 26.54 | 23.54 |
| 6750 | 46.32 | 41.29 | 33.4  | 26.54 | 23.54 |
| 6752 | 46.29 | 41.28 | 33.39 | 26.53 | 23.53 |
| 6754 | 46.26 | 41.27 | 33.4  | 26.55 | 23.55 |
| 6756 | 46.22 | 41.23 | 33.36 | 26.51 | 23.51 |
| 6758 | 46.2  | 41.22 | 33.37 | 26.52 | 23.52 |
| 6760 | 46.17 | 41.2  | 33.35 | 26.51 | 23.52 |
| 6762 | 46.15 | 41.2  | 33.36 | 26.51 | 23.53 |
| 6764 | 46.12 | 41.18 | 33.35 | 26.52 | 23.54 |
| 6766 | 46.13 | 41.19 | 33.35 | 26.53 | 23.54 |
| 6768 | 46.07 | 41.14 | 33.32 | 26.5  | 23.52 |
| 6770 | 46.03 | 41.11 | 33.31 | 26.49 | 23.52 |
| 6772 | 46.01 | 41.1  | 33.3  | 26.49 | 23.52 |
| 6774 | 45.97 | 41.07 | 33.29 | 26.49 | 23.51 |
| 6776 | 45.92 | 41.03 | 33.26 | 26.46 | 23.47 |
| 6778 | 45.92 | 41.04 | 33.27 | 26.47 | 23.5  |
| 6780 | 45.91 | 41.04 | 33.28 | 26.49 | 23.51 |
| 6782 | 45.86 | 41.01 | 33.26 | 26.47 | 23.5  |
| 6784 | 45.8  | 40.96 | 33.22 | 26.44 | 23.47 |
| 6786 | 45.79 | 40.96 | 33.22 | 26.46 | 23.48 |
| 6788 | 45.77 | 40.95 | 33.23 | 26.46 | 23.48 |
| 6790 | 45.77 | 40.95 | 33.24 | 26.47 | 23.5  |
| 6792 | 45.74 | 40.94 | 33.22 | 26.46 | 23.49 |
| 6794 | 45.71 | 40.91 | 33.22 | 26.45 | 23.49 |
| 6796 | 45.68 | 40.9  | 33.22 | 26.46 | 23.5  |
| 6798 | 45.66 | 40.88 | 33.21 | 26.46 | 23.5  |
| 6800 | 45.63 | 40.87 | 33.2  | 26.45 | 23.5  |
| 6802 | 45.61 | 40.87 | 33.21 | 26.47 | 23.5  |
| 6804 | 45.58 | 40.83 | 33.19 | 26.45 | 23.49 |
| 6806 | 45.56 | 40.82 | 33.18 | 26.45 | 23.49 |
| 6808 | 45.53 | 40.8  | 33.17 | 26.45 | 23.49 |
| 6810 | 45.52 | 40.81 | 33.19 | 26.47 | 23.5  |
| 6812 | 45.48 | 40.78 | 33.16 | 26.45 | 23.49 |
| 6814 | 45.45 | 40.76 | 33.15 | 26.44 | 23.48 |
| 6816 | 45.42 | 40.73 | 33.14 | 26.44 | 23.49 |
| 6818 | 45.39 | 40.72 | 33.13 | 26.44 | 23.48 |
| 6820 | 45.37 | 40.71 | 33.13 | 26.43 | 23.48 |
| 6822 | 45.34 | 40.69 | 33.11 | 26.44 | 23.48 |

|      |       |       |       |       |       |
|------|-------|-------|-------|-------|-------|
| 6824 | 45.34 | 40.68 | 33.12 | 26.44 | 23.49 |
| 6826 | 45.3  | 40.66 | 33.1  | 26.42 | 23.47 |
| 6828 | 45.29 | 40.65 | 33.11 | 26.44 | 23.49 |
| 6830 | 45.23 | 40.62 | 33.08 | 26.41 | 23.48 |
| 6832 | 45.21 | 40.61 | 33.08 | 26.43 | 23.49 |
| 6834 | 45.17 | 40.58 | 33.07 | 26.41 | 23.48 |
| 6836 | 45.14 | 40.56 | 33.06 | 26.39 | 23.46 |
| 6838 | 45.12 | 40.54 | 33.05 | 26.4  | 23.46 |
| 6840 | 45.09 | 40.52 | 33.03 | 26.38 | 23.46 |
| 6842 | 45.04 | 40.5  | 33.01 | 26.36 | 23.44 |
| 6844 | 45.03 | 40.49 | 33.02 | 26.38 | 23.45 |
| 6846 | 44.99 | 40.48 | 33.01 | 26.37 | 23.44 |
| 6848 | 44.96 | 40.44 | 32.98 | 26.35 | 23.44 |
| 6850 | 44.95 | 40.44 | 32.99 | 26.36 | 23.45 |
| 6852 | 44.94 | 40.44 | 33    | 26.38 | 23.46 |
| 6854 | 44.91 | 40.42 | 32.99 | 26.37 | 23.46 |
| 6856 | 44.89 | 40.4  | 32.99 | 26.37 | 23.45 |
| 6858 | 44.86 | 40.38 | 32.98 | 26.37 | 23.45 |
| 6860 | 44.84 | 40.38 | 32.98 | 26.37 | 23.46 |
| 6862 | 44.8  | 40.35 | 32.96 | 26.36 | 23.45 |
| 6864 | 44.75 | 40.31 | 32.92 | 26.33 | 23.42 |
| 6866 | 44.75 | 40.31 | 32.94 | 26.35 | 23.44 |
| 6868 | 44.72 | 40.3  | 32.93 | 26.36 | 23.44 |
| 6870 | 44.72 | 40.29 | 32.93 | 26.37 | 23.44 |
| 6872 | 44.69 | 40.29 | 32.94 | 26.36 | 23.45 |
| 6874 | 44.66 | 40.27 | 32.93 | 26.36 | 23.45 |
| 6876 | 44.64 | 40.25 | 32.92 | 26.35 | 23.44 |
| 6878 | 44.62 | 40.24 | 32.9  | 26.36 | 23.44 |
| 6880 | 44.57 | 40.21 | 32.89 | 26.35 | 23.43 |
| 6882 | 44.56 | 40.2  | 32.9  | 26.35 | 23.44 |
| 6884 | 44.52 | 40.17 | 32.89 | 26.34 | 23.43 |
| 6886 | 44.5  | 40.16 | 32.87 | 26.32 | 23.43 |
| 6888 | 44.47 | 40.14 | 32.87 | 26.32 | 23.44 |
| 6890 | 44.45 | 40.13 | 32.86 | 26.33 | 23.43 |
| 6892 | 44.42 | 40.12 | 32.86 | 26.32 | 23.43 |
| 6894 | 44.38 | 40.08 | 32.83 | 26.3  | 23.42 |
| 6896 | 44.36 | 40.07 | 32.83 | 26.31 | 23.42 |
| 6898 | 44.33 | 40.06 | 32.82 | 26.31 | 23.41 |
| 6900 | 44.3  | 40.03 | 32.8  | 26.28 | 23.4  |
| 6902 | 44.28 | 40.01 | 32.79 | 26.28 | 23.4  |
| 6904 | 44.27 | 40.02 | 32.81 | 26.3  | 23.42 |
| 6906 | 44.21 | 39.98 | 32.77 | 26.27 | 23.39 |
| 6908 | 44.19 | 39.95 | 32.77 | 26.28 | 23.39 |
| 6910 | 44.2  | 39.97 | 32.79 | 26.29 | 23.42 |

|      |       |       |       |       |       |
|------|-------|-------|-------|-------|-------|
| 6912 | 44.19 | 39.96 | 32.78 | 26.3  | 23.42 |
| 6914 | 44.16 | 39.94 | 32.77 | 26.3  | 23.41 |
| 6916 | 44.12 | 39.92 | 32.77 | 26.29 | 23.41 |
| 6918 | 44.1  | 39.91 | 32.75 | 26.29 | 23.41 |
| 6920 | 44.05 | 39.87 | 32.73 | 26.26 | 23.4  |
| 6922 | 44.07 | 39.9  | 32.75 | 26.29 | 23.42 |
| 6924 | 44.03 | 39.87 | 32.74 | 26.28 | 23.42 |
| 6926 | 44    | 39.85 | 32.73 | 26.27 | 23.41 |
| 6928 | 43.97 | 39.84 | 32.72 | 26.28 | 23.41 |
| 6930 | 43.96 | 39.83 | 32.74 | 26.28 | 23.42 |
| 6932 | 43.92 | 39.8  | 32.71 | 26.26 | 23.41 |
| 6934 | 43.9  | 39.79 | 32.7  | 26.27 | 23.41 |
| 6936 | 43.87 | 39.77 | 32.69 | 26.27 | 23.41 |
| 6938 | 43.85 | 39.76 | 32.69 | 26.27 | 23.4  |
| 6940 | 43.82 | 39.74 | 32.68 | 26.25 | 23.4  |
| 6942 | 43.8  | 39.73 | 32.67 | 26.25 | 23.4  |
| 6944 | 43.75 | 39.67 | 32.64 | 26.23 | 23.37 |
| 6946 | 43.75 | 39.69 | 32.66 | 26.25 | 23.39 |
| 6948 | 43.74 | 39.69 | 32.66 | 26.25 | 23.39 |
| 6950 | 43.71 | 39.67 | 32.65 | 26.25 | 23.39 |
| 6952 | 43.69 | 39.66 | 32.65 | 26.25 | 23.38 |
| 6954 | 43.62 | 39.61 | 32.61 | 26.21 | 23.34 |
| 6956 | 43.6  | 39.6  | 32.6  | 26.21 | 23.35 |
| 6958 | 43.6  | 39.6  | 32.61 | 26.24 | 23.37 |
| 6960 | 43.6  | 39.6  | 32.62 | 26.24 | 23.38 |
| 6962 | 43.57 | 39.59 | 32.61 | 26.25 | 23.38 |
| 6964 | 43.53 | 39.54 | 32.59 | 26.22 | 23.36 |
| 6966 | 43.52 | 39.55 | 32.6  | 26.23 | 23.38 |
| 6968 | 43.49 | 39.53 | 32.58 | 26.21 | 23.36 |
| 6970 | 43.49 | 39.53 | 32.59 | 26.23 | 23.39 |
| 6972 | 43.44 | 39.5  | 32.58 | 26.21 | 23.38 |
| 6974 | 43.41 | 39.48 | 32.56 | 26.21 | 23.37 |
| 6976 | 43.38 | 39.47 | 32.56 | 26.21 | 23.37 |
| 6978 | 43.36 | 39.45 | 32.55 | 26.21 | 23.37 |
| 6980 | 43.34 | 39.44 | 32.54 | 26.2  | 23.37 |
| 6982 | 43.32 | 39.42 | 32.54 | 26.2  | 23.37 |
| 6984 | 43.29 | 39.41 | 32.53 | 26.19 | 23.37 |
| 6986 | 43.25 | 39.4  | 32.5  | 26.18 | 23.35 |
| 6988 | 43.22 | 39.36 | 32.5  | 26.16 | 23.34 |
| 6990 | 43.21 | 39.35 | 32.5  | 26.18 | 23.36 |
| 6992 | 43.19 | 39.34 | 32.5  | 26.18 | 23.36 |
| 6994 | 43.16 | 39.32 | 32.49 | 26.18 | 23.34 |
| 6996 | 43.15 | 39.32 | 32.49 | 26.18 | 23.35 |
| 6998 | 43.13 | 39.31 | 32.49 | 26.19 | 23.36 |

|      |       |       |       |       |       |
|------|-------|-------|-------|-------|-------|
| 7000 | 43.1  | 39.28 | 32.46 | 26.16 | 23.33 |
| 7002 | 43.08 | 39.27 | 32.47 | 26.18 | 23.34 |
| 7004 | 43.04 | 39.23 | 32.43 | 26.15 | 23.34 |
| 7006 | 43    | 39.2  | 32.4  | 26.14 | 23.31 |
| 7008 | 43.01 | 39.23 | 32.44 | 26.18 | 23.35 |
| 7010 | 42.99 | 39.21 | 32.44 | 26.17 | 23.34 |
| 7012 | 42.97 | 39.21 | 32.44 | 26.17 | 23.35 |
| 7014 | 42.94 | 39.18 | 32.41 | 26.16 | 23.32 |
| 7016 | 42.92 | 39.17 | 32.41 | 26.17 | 23.34 |
| 7018 | 42.88 | 39.15 | 32.4  | 26.15 | 23.33 |
| 7020 | 42.84 | 39.11 | 32.38 | 26.12 | 23.31 |
| 7022 | 42.81 | 39.09 | 32.36 | 26.11 | 23.3  |
| 7024 | 42.77 | 39.06 | 32.34 | 26.09 | 23.29 |
| 7026 | 42.76 | 39.06 | 32.34 | 26.09 | 23.3  |
| 7028 | 42.72 | 39.04 | 32.33 | 26.1  | 23.3  |
| 7030 | 42.72 | 39.03 | 32.34 | 26.1  | 23.31 |
| 7032 | 42.69 | 39.01 | 32.32 | 26.09 | 23.29 |
| 7034 | 42.65 | 38.97 | 32.3  | 26.06 | 23.27 |
| 7036 | 42.68 | 39.01 | 32.34 | 26.12 | 23.32 |
| 7038 | 42.64 | 38.98 | 32.31 | 26.11 | 23.31 |
| 7040 | 42.63 | 38.98 | 32.32 | 26.12 | 23.31 |
| 7042 | 42.59 | 38.96 | 32.3  | 26.11 | 23.29 |
| 7044 | 42.56 | 38.94 | 32.3  | 26.1  | 23.3  |
| 7046 | 42.54 | 38.93 | 32.29 | 26.1  | 23.31 |
| 7048 | 42.53 | 38.92 | 32.29 | 26.08 | 23.29 |
| 7050 | 42.49 | 38.89 | 32.27 | 26.08 | 23.27 |
| 7052 | 42.45 | 38.86 | 32.24 | 26.07 | 23.26 |
| 7054 | 42.45 | 38.86 | 32.26 | 26.08 | 23.28 |
| 7056 | 42.39 | 38.82 | 32.22 | 26.04 | 23.24 |
| 7058 | 42.37 | 38.8  | 32.22 | 26.04 | 23.26 |
| 7060 | 42.38 | 38.82 | 32.22 | 26.06 | 23.29 |
| 7062 | 42.34 | 38.79 | 32.22 | 26.03 | 23.28 |
| 7064 | 42.33 | 38.79 | 32.24 | 26.08 | 23.3  |
| 7066 | 42.33 | 38.8  | 32.24 | 26.08 | 23.3  |
| 7068 | 42.32 | 38.79 | 32.25 | 26.09 | 23.31 |
| 7070 | 42.27 | 38.76 | 32.23 | 26.08 | 23.3  |
| 7072 | 42.24 | 38.73 | 32.19 | 26.06 | 23.28 |
| 7074 | 42.19 | 38.69 | 32.16 | 26.02 | 23.25 |
| 7076 | 42.22 | 38.74 | 32.21 | 26.07 | 23.3  |
| 7078 | 42.19 | 38.71 | 32.2  | 26.06 | 23.29 |
| 7080 | 42.16 | 38.69 | 32.19 | 26.06 | 23.29 |
| 7082 | 42.12 | 38.66 | 32.17 | 26.02 | 23.27 |
| 7084 | 42.1  | 38.65 | 32.16 | 26.02 | 23.26 |
| 7086 | 42.09 | 38.64 | 32.16 | 26.03 | 23.27 |

|      |       |       |       |       |       |
|------|-------|-------|-------|-------|-------|
| 7088 | 42.07 | 38.64 | 32.16 | 26.05 | 23.27 |
| 7090 | 42.03 | 38.59 | 32.14 | 26.03 | 23.25 |
| 7092 | 42.04 | 38.61 | 32.15 | 26.05 | 23.27 |
| 7094 | 42.04 | 38.62 | 32.16 | 26.07 | 23.3  |
| 7096 | 42    | 38.6  | 32.14 | 26.05 | 23.27 |
| 7098 | 41.97 | 38.57 | 32.13 | 26.05 | 23.27 |
| 7100 | 41.94 | 38.55 | 32.13 | 26.04 | 23.27 |
| 7102 | 41.92 | 38.53 | 32.1  | 26.02 | 23.25 |
| 7104 | 41.93 | 38.55 | 32.13 | 26.05 | 23.28 |
| 7106 | 41.84 | 38.47 | 32.07 | 25.99 | 23.23 |
| 7108 | 41.82 | 38.46 | 32.05 | 25.98 | 23.23 |
| 7110 | 41.8  | 38.45 | 32.06 | 25.99 | 23.24 |
| 7112 | 41.78 | 38.43 | 32.05 | 25.98 | 23.23 |
| 7114 | 41.79 | 38.46 | 32.07 | 26.02 | 23.27 |
| 7116 | 41.75 | 38.44 | 32.06 | 26.01 | 23.25 |
| 7118 | 41.75 | 38.42 | 32.05 | 26.01 | 23.27 |
| 7120 | 41.73 | 38.42 | 32.06 | 26.01 | 23.26 |
| 7122 | 41.69 | 38.39 | 32.05 | 26.01 | 23.26 |
| 7124 | 41.68 | 38.38 | 32.05 | 26    | 23.27 |
| 7126 | 41.64 | 38.35 | 32.03 | 26    | 23.26 |
| 7128 | 41.65 | 38.36 | 32.04 | 26.01 | 23.27 |
| 7130 | 41.63 | 38.35 | 32.04 | 26.01 | 23.26 |
| 7132 | 41.61 | 38.35 | 32.04 | 26.01 | 23.27 |
| 7134 | 41.61 | 38.36 | 32.06 | 26.04 | 23.3  |
| 7136 | 41.56 | 38.32 | 32.02 | 26    | 23.25 |
| 7138 | 41.53 | 38.29 | 32.01 | 26    | 23.26 |
| 7140 | 41.52 | 38.29 | 32.01 | 26.01 | 23.27 |
| 7142 | 41.48 | 38.27 | 31.99 | 26    | 23.27 |
| 7144 | 41.48 | 38.27 | 32.01 | 26    | 23.27 |
| 7146 | 41.45 | 38.26 | 32    | 26    | 23.27 |
| 7148 | 41.42 | 38.23 | 31.98 | 25.98 | 23.27 |
| 7150 | 41.38 | 38.21 | 31.96 | 25.98 | 23.25 |
| 7152 | 41.34 | 38.16 | 31.92 | 25.94 | 23.22 |
| 7154 | 41.36 | 38.19 | 31.95 | 25.97 | 23.25 |
| 7156 | 41.32 | 38.16 | 31.93 | 25.95 | 23.24 |
| 7158 | 41.29 | 38.13 | 31.91 | 25.95 | 23.24 |
| 7160 | 41.27 | 38.11 | 31.91 | 25.93 | 23.22 |
| 7162 | 41.25 | 38.11 | 31.9  | 25.93 | 23.21 |
| 7164 | 41.21 | 38.09 | 31.89 | 25.93 | 23.22 |
| 7166 | 41.18 | 38.06 | 31.86 | 25.92 | 23.19 |
| 7168 | 41.14 | 38.02 | 31.84 | 25.9  | 23.18 |
| 7170 | 41.16 | 38.06 | 31.88 | 25.94 | 23.22 |
| 7172 | 41.17 | 38.06 | 31.9  | 25.96 | 23.24 |
| 7174 | 41.13 | 38.03 | 31.86 | 25.95 | 23.21 |



|      |       |       |       |       |       |
|------|-------|-------|-------|-------|-------|
| 7176 | 41.14 | 38.06 | 31.9  | 25.98 | 23.25 |
| 7178 | 41.1  | 38.02 | 31.87 | 25.95 | 23.22 |
| 7180 | 41.08 | 38.01 | 31.87 | 25.95 | 23.21 |
| 7182 | 41.07 | 38.01 | 31.88 | 25.95 | 23.23 |
| 7184 | 41.07 | 38    | 31.88 | 25.96 | 23.24 |
| 7186 | 41    | 37.95 | 31.84 | 25.93 | 23.21 |
| 7188 | 40.97 | 37.92 | 31.82 | 25.9  | 23.2  |
| 7190 | 40.98 | 37.94 | 31.83 | 25.92 | 23.21 |
| 7192 | 40.97 | 37.94 | 31.84 | 25.94 | 23.23 |
| 7194 | 40.95 | 37.93 | 31.84 | 25.94 | 23.24 |
| 7196 | 40.88 | 37.87 | 31.8  | 25.89 | 23.19 |
| 7198 | 40.85 | 37.85 | 31.78 | 25.88 | 23.18 |
| 7200 | 40.83 | 37.83 | 31.76 | 25.88 | 23.17 |
| 7202 | 40.82 | 37.83 | 31.76 | 25.88 | 23.17 |
| 7204 | 40.78 | 37.81 | 31.74 | 25.87 | 23.16 |
| 7206 | 40.78 | 37.82 | 31.76 | 25.91 | 23.19 |
| 7208 | 40.8  | 37.83 | 31.78 | 25.92 | 23.21 |
| 7210 | 40.78 | 37.83 | 31.79 | 25.93 | 23.23 |
| 7212 | 40.75 | 37.81 | 31.76 | 25.91 | 23.21 |
| 7214 | 40.71 | 37.76 | 31.74 | 25.89 | 23.18 |
| 7216 | 40.69 | 37.76 | 31.75 | 25.9  | 23.2  |
| 7218 | 40.69 | 37.76 | 31.75 | 25.9  | 23.21 |
| 7220 | 40.63 | 37.71 | 31.71 | 25.86 | 23.18 |
| 7222 | 40.61 | 37.7  | 31.71 | 25.86 | 23.17 |
| 7224 | 40.6  | 37.7  | 31.71 | 25.87 | 23.16 |
| 7226 | 40.57 | 37.68 | 31.7  | 25.86 | 23.17 |
| 7228 | 40.58 | 37.69 | 31.71 | 25.88 | 23.19 |
| 7230 | 40.53 | 37.65 | 31.69 | 25.86 | 23.18 |
| 7232 | 40.52 | 37.64 | 31.68 | 25.86 | 23.18 |
| 7234 | 40.5  | 37.63 | 31.67 | 25.85 | 23.15 |
| 7236 | 40.47 | 37.6  | 31.66 | 25.84 | 23.16 |
| 7238 | 40.45 | 37.59 | 31.65 | 25.84 | 23.14 |
| 7240 | 40.42 | 37.58 | 31.64 | 25.83 | 23.15 |
| 7242 | 40.4  | 37.56 | 31.62 | 25.83 | 23.14 |
| 7244 | 40.4  | 37.57 | 31.64 | 25.84 | 23.14 |
| 7246 | 40.37 | 37.55 | 31.63 | 25.84 | 23.15 |
| 7248 | 40.34 | 37.53 | 31.63 | 25.85 | 23.16 |
| 7250 | 40.33 | 37.52 | 31.62 | 25.84 | 23.15 |
| 7252 | 40.29 | 37.49 | 31.6  | 25.81 | 23.14 |
| 7254 | 40.27 | 37.48 | 31.59 | 25.81 | 23.14 |
| 7256 | 40.26 | 37.47 | 31.59 | 25.82 | 23.14 |
| 7258 | 40.26 | 37.48 | 31.6  | 25.82 | 23.14 |
| 7260 | 40.26 | 37.5  | 31.63 | 25.86 | 23.19 |
| 7262 | 40.25 | 37.49 | 31.63 | 25.86 | 23.19 |

|      |       |       |       |       |       |
|------|-------|-------|-------|-------|-------|
| 7264 | 40.19 | 37.45 | 31.59 | 25.83 | 23.16 |
| 7266 | 40.18 | 37.44 | 31.59 | 25.83 | 23.14 |
| 7268 | 40.2  | 37.46 | 31.62 | 25.87 | 23.18 |
| 7270 | 40.17 | 37.43 | 31.59 | 25.85 | 23.17 |
| 7272 | 40.16 | 37.43 | 31.6  | 25.86 | 23.19 |
| 7274 | 40.14 | 37.43 | 31.6  | 25.86 | 23.19 |
| 7276 | 40.12 | 37.39 | 31.57 | 25.84 | 23.18 |
| 7278 | 40.09 | 37.39 | 31.59 | 25.85 | 23.18 |
| 7280 | 40.09 | 37.39 | 31.59 | 25.86 | 23.19 |
| 7282 | 40.05 | 37.35 | 31.57 | 25.84 | 23.17 |
| 7284 | 40    | 37.31 | 31.53 | 25.81 | 23.14 |
| 7286 | 40    | 37.33 | 31.55 | 25.83 | 23.17 |
| 7288 | 39.95 | 37.28 | 31.52 | 25.8  | 23.14 |
| 7290 | 39.93 | 37.26 | 31.5  | 25.79 | 23.14 |
| 7292 | 39.9  | 37.25 | 31.5  | 25.79 | 23.13 |
| 7294 | 39.91 | 37.28 | 31.52 | 25.81 | 23.16 |
| 7296 | 39.92 | 37.28 | 31.53 | 25.83 | 23.18 |
| 7298 | 39.89 | 37.25 | 31.52 | 25.81 | 23.17 |
| 7300 | 39.86 | 37.24 | 31.51 | 25.83 | 23.18 |
| 7302 | 39.81 | 37.19 | 31.46 | 25.77 | 23.12 |
| 7304 | 39.79 | 37.19 | 31.47 | 25.79 | 23.15 |
| 7306 | 39.77 | 37.17 | 31.45 | 25.78 | 23.13 |
| 7308 | 39.75 | 37.17 | 31.45 | 25.78 | 23.13 |
| 7310 | 39.74 | 37.16 | 31.46 | 25.79 | 23.13 |
| 7312 | 39.74 | 37.14 | 31.45 | 25.79 | 23.12 |
| 7314 | 39.73 | 37.15 | 31.46 | 25.81 | 23.14 |
| 7316 | 39.68 | 37.11 | 31.42 | 25.78 | 23.11 |
| 7318 | 39.71 | 37.15 | 31.47 | 25.82 | 23.16 |
| 7320 | 39.65 | 37.09 | 31.42 | 25.77 | 23.12 |
| 7322 | 39.63 | 37.09 | 31.43 | 25.78 | 23.13 |
| 7324 | 39.63 | 37.08 | 31.43 | 25.78 | 23.14 |
| 7326 | 39.61 | 37.08 | 31.42 | 25.8  | 23.14 |
| 7328 | 39.58 | 37.05 | 31.41 | 25.77 | 23.12 |
| 7330 | 39.59 | 37.07 | 31.44 | 25.79 | 23.16 |
| 7332 | 39.54 | 37.02 | 31.41 | 25.76 | 23.13 |
| 7334 | 39.53 | 37.03 | 31.4  | 25.78 | 23.14 |
| 7336 | 39.5  | 37    | 31.38 | 25.76 | 23.12 |
| 7338 | 39.48 | 37    | 31.37 | 25.75 | 23.11 |
| 7340 | 39.44 | 36.95 | 31.35 | 25.74 | 23.1  |
| 7342 | 39.42 | 36.94 | 31.34 | 25.72 | 23.1  |
| 7344 | 39.4  | 36.93 | 31.34 | 25.73 | 23.1  |
| 7346 | 39.39 | 36.92 | 31.34 | 25.73 | 23.09 |
| 7348 | 39.38 | 36.92 | 31.34 | 25.73 | 23.1  |
| 7350 | 39.39 | 36.93 | 31.36 | 25.77 | 23.12 |

|      |       |       |       |       |       |
|------|-------|-------|-------|-------|-------|
| 7352 | 39.34 | 36.88 | 31.32 | 25.75 | 23.11 |
| 7354 | 39.32 | 36.88 | 31.32 | 25.74 | 23.1  |
| 7356 | 39.31 | 36.88 | 31.31 | 25.74 | 23.12 |
| 7358 | 39.28 | 36.86 | 31.3  | 25.73 | 23.1  |
| 7360 | 39.29 | 36.88 | 31.33 | 25.75 | 23.12 |
| 7362 | 39.25 | 36.84 | 31.3  | 25.74 | 23.12 |
| 7364 | 39.25 | 36.85 | 31.31 | 25.74 | 23.12 |
| 7366 | 39.22 | 36.82 | 31.3  | 25.72 | 23.1  |
| 7368 | 39.2  | 36.81 | 31.29 | 25.71 | 23.1  |
| 7370 | 39.18 | 36.79 | 31.28 | 25.71 | 23.1  |
| 7372 | 39.16 | 36.79 | 31.28 | 25.71 | 23.1  |
| 7374 | 39.14 | 36.77 | 31.26 | 25.7  | 23.08 |
| 7376 | 39.13 | 36.77 | 31.28 | 25.71 | 23.11 |
| 7378 | 39.07 | 36.73 | 31.24 | 25.69 | 23.08 |
| 7380 | 39.09 | 36.75 | 31.26 | 25.71 | 23.13 |
| 7382 | 39.09 | 36.74 | 31.26 | 25.72 | 23.11 |
| 7384 | 39.04 | 36.7  | 31.24 | 25.7  | 23.1  |
| 7386 | 39.01 | 36.68 | 31.22 | 25.68 | 23.09 |
| 7388 | 38.99 | 36.66 | 31.21 | 25.68 | 23.07 |
| 7390 | 38.98 | 36.66 | 31.21 | 25.69 | 23.09 |
| 7392 | 38.95 | 36.64 | 31.2  | 25.67 | 23.07 |
| 7394 | 38.93 | 36.63 | 31.19 | 25.67 | 23.07 |
| 7396 | 38.94 | 36.64 | 31.22 | 25.7  | 23.11 |
| 7398 | 38.9  | 36.61 | 31.18 | 25.67 | 23.07 |
| 7400 | 38.89 | 36.6  | 31.18 | 25.67 | 23.07 |
| 7402 | 38.86 | 36.58 | 31.16 | 25.67 | 23.06 |
| 7404 | 38.86 | 36.58 | 31.17 | 25.67 | 23.07 |
| 7406 | 38.83 | 36.57 | 31.16 | 25.67 | 23.06 |
| 7408 | 38.82 | 36.56 | 31.16 | 25.67 | 23.06 |
| 7410 | 38.79 | 36.54 | 31.15 | 25.67 | 23.06 |
| 7412 | 38.78 | 36.53 | 31.14 | 25.67 | 23.07 |
| 7414 | 38.76 | 36.52 | 31.14 | 25.66 | 23.06 |
| 7416 | 38.74 | 36.51 | 31.13 | 25.65 | 23.06 |
| 7418 | 38.72 | 36.49 | 31.12 | 25.65 | 23.06 |
| 7420 | 38.7  | 36.48 | 31.12 | 25.65 | 23.06 |
| 7422 | 38.69 | 36.47 | 31.11 | 25.65 | 23.06 |
| 7424 | 38.69 | 36.49 | 31.13 | 25.67 | 23.07 |
| 7426 | 38.7  | 36.5  | 31.15 | 25.69 | 23.1  |
| 7428 | 38.64 | 36.45 | 31.11 | 25.65 | 23.07 |
| 7430 | 38.63 | 36.44 | 31.11 | 25.67 | 23.08 |
| 7432 | 38.64 | 36.47 | 31.13 | 25.69 | 23.1  |
| 7434 | 38.64 | 36.46 | 31.13 | 25.7  | 23.09 |
| 7436 | 38.64 | 36.46 | 31.14 | 25.71 | 23.12 |
| 7438 | 38.62 | 36.45 | 31.14 | 25.7  | 23.12 |

|      |       |       |       |       |       |
|------|-------|-------|-------|-------|-------|
| 7440 | 38.59 | 36.44 | 31.13 | 25.69 | 23.1  |
| 7442 | 38.57 | 36.43 | 31.12 | 25.69 | 23.1  |
| 7444 | 38.54 | 36.39 | 31.1  | 25.67 | 23.08 |
| 7446 | 38.54 | 36.4  | 31.11 | 25.69 | 23.1  |
| 7448 | 38.51 | 36.39 | 31.1  | 25.69 | 23.09 |
| 7450 | 38.5  | 36.38 | 31.11 | 25.7  | 23.1  |
| 7452 | 38.47 | 36.36 | 31.08 | 25.67 | 23.08 |
| 7454 | 38.44 | 36.34 | 31.08 | 25.67 | 23.08 |
| 7456 | 38.45 | 36.35 | 31.1  | 25.69 | 23.1  |
| 7458 | 38.4  | 36.3  | 31.04 | 25.63 | 23.05 |
| 7460 | 38.42 | 36.31 | 31.07 | 25.66 | 23.1  |
| 7462 | 38.39 | 36.3  | 31.05 | 25.64 | 23.08 |
| 7464 | 38.36 | 36.29 | 31.05 | 25.64 | 23.08 |
| 7466 | 38.32 | 36.25 | 31.02 | 25.62 | 23.05 |
| 7468 | 38.34 | 36.28 | 31.04 | 25.64 | 23.08 |
| 7470 | 38.28 | 36.23 | 31    | 25.62 | 23.05 |
| 7472 | 38.27 | 36.21 | 31    | 25.62 | 23.04 |
| 7474 | 38.25 | 36.22 | 31.01 | 25.64 | 23.06 |
| 7476 | 38.27 | 36.22 | 31.02 | 25.65 | 23.08 |
| 7478 | 38.25 | 36.22 | 31.02 | 25.66 | 23.08 |
| 7480 | 38.25 | 36.23 | 31.04 | 25.67 | 23.1  |
| 7482 | 38.19 | 36.17 | 30.99 | 25.63 | 23.06 |
| 7484 | 38.16 | 36.14 | 30.96 | 25.61 | 23.05 |
| 7486 | 38.15 | 36.14 | 30.96 | 25.61 | 23.04 |
| 7488 | 38.13 | 36.13 | 30.95 | 25.61 | 23.03 |
| 7490 | 38.12 | 36.13 | 30.96 | 25.62 | 23.05 |
| 7492 | 38.1  | 36.1  | 30.94 | 25.6  | 23.03 |
| 7494 | 38.05 | 36.07 | 30.93 | 25.58 | 23.02 |
| 7496 | 38.07 | 36.08 | 30.95 | 25.61 | 23.05 |
| 7498 | 38.03 | 36.06 | 30.92 | 25.58 | 23.04 |
| 7500 | 38.02 | 36.05 | 30.91 | 25.59 | 23.03 |
| 7502 | 38    | 36.04 | 30.91 | 25.58 | 23.03 |
| 7504 | 37.98 | 36.03 | 30.91 | 25.58 | 23.03 |
| 7506 | 37.95 | 36.01 | 30.89 | 25.57 | 23.02 |
| 7508 | 37.94 | 36.01 | 30.89 | 25.57 | 23.03 |
| 7510 | 37.93 | 36    | 30.88 | 25.58 | 23.03 |
| 7512 | 37.9  | 35.96 | 30.86 | 25.55 | 23    |
| 7514 | 37.89 | 35.97 | 30.87 | 25.56 | 23.02 |
| 7516 | 37.85 | 35.92 | 30.84 | 25.54 | 23    |
| 7518 | 37.86 | 35.94 | 30.86 | 25.56 | 23.02 |
| 7520 | 37.86 | 35.96 | 30.88 | 25.59 | 23.04 |
| 7522 | 37.87 | 35.97 | 30.89 | 25.6  | 23.04 |
| 7524 | 37.83 | 35.94 | 30.86 | 25.58 | 23.03 |
| 7526 | 37.81 | 35.91 | 30.85 | 25.57 | 23.02 |

|      |       |       |       |       |       |
|------|-------|-------|-------|-------|-------|
| 7528 | 37.79 | 35.9  | 30.85 | 25.57 | 23.02 |
| 7530 | 37.77 | 35.89 | 30.85 | 25.57 | 23.02 |
| 7532 | 37.76 | 35.89 | 30.85 | 25.57 | 23.02 |
| 7534 | 37.76 | 35.89 | 30.86 | 25.58 | 23.04 |
| 7536 | 37.75 | 35.9  | 30.86 | 25.6  | 23.06 |
| 7538 | 37.74 | 35.89 | 30.86 | 25.6  | 23.07 |
| 7540 | 37.72 | 35.86 | 30.84 | 25.57 | 23.04 |
| 7542 | 37.71 | 35.87 | 30.85 | 25.59 | 23.06 |
| 7544 | 37.67 | 35.84 | 30.83 | 25.57 | 23.04 |
| 7546 | 37.62 | 35.8  | 30.8  | 25.54 | 23.01 |
| 7548 | 37.61 | 35.79 | 30.79 | 25.54 | 23.01 |
| 7550 | 37.61 | 35.8  | 30.81 | 25.57 | 23.04 |
| 7552 | 37.57 | 35.77 | 30.79 | 25.54 | 23.01 |
| 7554 | 37.58 | 35.78 | 30.79 | 25.56 | 23.03 |
| 7556 | 37.55 | 35.76 | 30.78 | 25.54 | 23.01 |
| 7558 | 37.53 | 35.74 | 30.78 | 25.54 | 23.01 |
| 7560 | 37.51 | 35.73 | 30.77 | 25.54 | 23.01 |
| 7562 | 37.49 | 35.72 | 30.75 | 25.53 | 23    |
| 7564 | 37.5  | 35.73 | 30.75 | 25.54 | 23.02 |
| 7566 | 37.46 | 35.7  | 30.74 | 25.53 | 23.01 |
| 7568 | 37.44 | 35.68 | 30.75 | 25.52 | 23    |
| 7570 | 37.43 | 35.67 | 30.73 | 25.51 | 23    |
| 7572 | 37.42 | 35.68 | 30.73 | 25.52 | 23.01 |
| 7574 | 37.43 | 35.69 | 30.75 | 25.54 | 23.03 |
| 7576 | 37.39 | 35.65 | 30.72 | 25.52 | 23    |
| 7578 | 37.39 | 35.66 | 30.73 | 25.54 | 23.01 |
| 7580 | 37.36 | 35.64 | 30.72 | 25.53 | 23    |
| 7582 | 37.35 | 35.64 | 30.71 | 25.52 | 23    |
| 7584 | 37.33 | 35.61 | 30.71 | 25.52 | 22.99 |
| 7586 | 37.3  | 35.6  | 30.7  | 25.52 | 22.99 |
| 7588 | 37.29 | 35.58 | 30.69 | 25.52 | 22.99 |
| 7590 | 37.29 | 35.6  | 30.7  | 25.54 | 23.01 |
| 7592 | 37.26 | 35.57 | 30.68 | 25.52 | 22.99 |
| 7594 | 37.26 | 35.56 | 30.67 | 25.53 | 23    |
| 7596 | 37.25 | 35.56 | 30.69 | 25.52 | 23    |
| 7598 | 37.22 | 35.54 | 30.66 | 25.5  | 22.99 |
| 7600 | 37.19 | 35.52 | 30.65 | 25.5  | 22.98 |
| 7602 | 37.16 | 35.49 | 30.63 | 25.48 | 22.97 |
| 7604 | 37.16 | 35.51 | 30.66 | 25.51 | 23    |
| 7606 | 37.14 | 35.49 | 30.64 | 25.49 | 22.99 |
| 7608 | 37.12 | 35.48 | 30.64 | 25.49 | 22.98 |
| 7610 | 37.1  | 35.46 | 30.63 | 25.48 | 22.98 |
| 7612 | 37.08 | 35.45 | 30.62 | 25.48 | 22.98 |
| 7614 | 37.07 | 35.44 | 30.62 | 25.48 | 22.98 |

|      |       |       |       |       |       |
|------|-------|-------|-------|-------|-------|
| 7616 | 37.06 | 35.43 | 30.62 | 25.48 | 22.97 |
| 7618 | 37.05 | 35.43 | 30.61 | 25.49 | 22.98 |
| 7620 | 37.04 | 35.43 | 30.64 | 25.5  | 22.99 |
| 7622 | 37.03 | 35.42 | 30.61 | 25.5  | 22.99 |
| 7624 | 37.01 | 35.4  | 30.6  | 25.49 | 22.97 |
| 7626 | 36.98 | 35.39 | 30.6  | 25.48 | 22.97 |
| 7628 | 36.99 | 35.4  | 30.62 | 25.51 | 22.99 |
| 7630 | 36.96 | 35.37 | 30.59 | 25.48 | 22.97 |
| 7632 | 36.94 | 35.36 | 30.59 | 25.48 | 22.97 |
| 7634 | 36.93 | 35.36 | 30.59 | 25.49 | 22.99 |
| 7636 | 36.91 | 35.34 | 30.57 | 25.48 | 22.97 |
| 7638 | 36.91 | 35.34 | 30.58 | 25.49 | 22.97 |
| 7640 | 36.88 | 35.32 | 30.56 | 25.47 | 22.96 |
| 7642 | 36.86 | 35.31 | 30.56 | 25.47 | 22.96 |
| 7644 | 36.84 | 35.3  | 30.55 | 25.47 | 22.96 |
| 7646 | 36.82 | 35.28 | 30.53 | 25.46 | 22.95 |
| 7648 | 36.82 | 35.29 | 30.55 | 25.47 | 22.96 |
| 7650 | 36.76 | 35.23 | 30.5  | 25.42 | 22.92 |
| 7652 | 36.77 | 35.26 | 30.53 | 25.45 | 22.94 |
| 7654 | 36.77 | 35.25 | 30.54 | 25.46 | 22.96 |
| 7656 | 36.76 | 35.25 | 30.54 | 25.48 | 22.98 |
| 7658 | 36.74 | 35.24 | 30.52 | 25.46 | 22.96 |
| 7660 | 36.73 | 35.24 | 30.53 | 25.46 | 22.96 |
| 7662 | 36.71 | 35.22 | 30.52 | 25.46 | 22.97 |
| 7664 | 36.69 | 35.2  | 30.5  | 25.45 | 22.95 |
| 7666 | 36.69 | 35.2  | 30.51 | 25.46 | 22.96 |
| 7668 | 36.66 | 35.18 | 30.49 | 25.45 | 22.95 |
| 7670 | 36.64 | 35.17 | 30.49 | 25.45 | 22.95 |
| 7672 | 36.63 | 35.17 | 30.49 | 25.45 | 22.95 |
| 7674 | 36.62 | 35.15 | 30.49 | 25.45 | 22.95 |
| 7676 | 36.6  | 35.13 | 30.48 | 25.44 | 22.94 |
| 7678 | 36.56 | 35.12 | 30.46 | 25.43 | 22.94 |
| 7680 | 36.57 | 35.12 | 30.46 | 25.44 | 22.95 |
| 7682 | 36.56 | 35.11 | 30.46 | 25.44 | 22.95 |
| 7684 | 36.54 | 35.11 | 30.46 | 25.44 | 22.95 |
| 7686 | 36.52 | 35.1  | 30.46 | 25.43 | 22.94 |
| 7688 | 36.53 | 35.11 | 30.48 | 25.47 | 22.98 |
| 7690 | 36.51 | 35.09 | 30.45 | 25.44 | 22.96 |
| 7692 | 36.48 | 35.06 | 30.43 | 25.43 | 22.94 |
| 7694 | 36.47 | 35.05 | 30.43 | 25.42 | 22.95 |
| 7696 | 36.44 | 35.04 | 30.42 | 25.42 | 22.93 |
| 7698 | 36.43 | 35.03 | 30.43 | 25.43 | 22.94 |
| 7700 | 36.4  | 35.01 | 30.4  | 25.42 | 22.94 |
| 7702 | 36.39 | 35    | 30.41 | 25.41 | 22.94 |

|      |       |       |       |       |       |
|------|-------|-------|-------|-------|-------|
| 7704 | 36.38 | 34.99 | 30.39 | 25.4  | 22.92 |
| 7706 | 36.34 | 34.96 | 30.37 | 25.38 | 22.9  |
| 7708 | 36.35 | 34.98 | 30.39 | 25.4  | 22.94 |
| 7710 | 36.34 | 34.98 | 30.39 | 25.41 | 22.94 |
| 7712 | 36.32 | 34.97 | 30.39 | 25.41 | 22.94 |
| 7714 | 36.3  | 34.95 | 30.39 | 25.41 | 22.93 |
| 7716 | 36.26 | 34.91 | 30.35 | 25.37 | 22.9  |
| 7718 | 36.3  | 34.96 | 30.39 | 25.42 | 22.93 |
| 7720 | 36.26 | 34.93 | 30.37 | 25.41 | 22.93 |
| 7722 | 36.2  | 34.86 | 30.31 | 25.36 | 22.88 |
| 7724 | 36.24 | 34.91 | 30.35 | 25.4  | 22.92 |
| 7726 | 36.21 | 34.88 | 30.34 | 25.39 | 22.91 |
| 7728 | 36.18 | 34.86 | 30.31 | 25.38 | 22.91 |
| 7730 | 36.19 | 34.86 | 30.32 | 25.38 | 22.9  |
| 7732 | 36.13 | 34.82 | 30.29 | 25.36 | 22.88 |
| 7734 | 36.15 | 34.85 | 30.33 | 25.39 | 22.92 |
| 7736 | 36.15 | 34.85 | 30.33 | 25.4  | 22.92 |
| 7738 | 36.11 | 34.82 | 30.3  | 25.36 | 22.91 |
| 7740 | 36.1  | 34.81 | 30.29 | 25.38 | 22.92 |
| 7742 | 36.07 | 34.78 | 30.28 | 25.36 | 22.89 |
| 7744 | 36.08 | 34.8  | 30.31 | 25.38 | 22.92 |
| 7746 | 36.05 | 34.78 | 30.29 | 25.37 | 22.91 |
| 7748 | 36.03 | 34.77 | 30.28 | 25.37 | 22.91 |
| 7750 | 36.02 | 34.77 | 30.28 | 25.37 | 22.9  |
| 7752 | 36.02 | 34.77 | 30.29 | 25.37 | 22.92 |
| 7754 | 36    | 34.76 | 30.28 | 25.36 | 22.92 |
| 7756 | 35.98 | 34.74 | 30.27 | 25.36 | 22.91 |
| 7758 | 35.97 | 34.74 | 30.27 | 25.36 | 22.92 |
| 7760 | 35.95 | 34.72 | 30.26 | 25.35 | 22.88 |
| 7762 | 35.93 | 34.69 | 30.25 | 25.34 | 22.89 |
| 7764 | 35.88 | 34.67 | 30.22 | 25.31 | 22.87 |
| 7766 | 35.89 | 34.68 | 30.24 | 25.35 | 22.9  |
| 7768 | 35.89 | 34.68 | 30.22 | 25.34 | 22.88 |
| 7770 | 35.89 | 34.69 | 30.24 | 25.36 | 22.9  |
| 7772 | 35.88 | 34.68 | 30.24 | 25.36 | 22.91 |
| 7774 | 35.85 | 34.66 | 30.21 | 25.35 | 22.9  |
| 7776 | 35.85 | 34.66 | 30.23 | 25.36 | 22.91 |
| 7778 | 35.84 | 34.65 | 30.23 | 25.35 | 22.9  |
| 7780 | 35.81 | 34.64 | 30.22 | 25.35 | 22.91 |
| 7782 | 35.8  | 34.63 | 30.22 | 25.34 | 22.9  |
| 7784 | 35.78 | 34.61 | 30.2  | 25.33 | 22.9  |
| 7786 | 35.75 | 34.59 | 30.19 | 25.31 | 22.88 |
| 7788 | 35.75 | 34.59 | 30.2  | 25.33 | 22.9  |
| 7790 | 35.74 | 34.58 | 30.19 | 25.33 | 22.9  |

|      |       |       |       |       |       |
|------|-------|-------|-------|-------|-------|
| 7792 | 35.73 | 34.57 | 30.19 | 25.33 | 22.9  |
| 7794 | 35.72 | 34.58 | 30.2  | 25.34 | 22.92 |
| 7796 | 35.7  | 34.56 | 30.17 | 25.33 | 22.9  |
| 7798 | 35.69 | 34.56 | 30.18 | 25.33 | 22.89 |
| 7800 | 35.68 | 34.55 | 30.19 | 25.35 | 22.91 |
| 7802 | 35.66 | 34.54 | 30.19 | 25.35 | 22.91 |
| 7804 | 35.66 | 34.53 | 30.19 | 25.35 | 22.92 |
| 7806 | 35.66 | 34.54 | 30.19 | 25.37 | 22.92 |
| 7808 | 35.64 | 34.53 | 30.18 | 25.36 | 22.91 |
| 7810 | 35.61 | 34.51 | 30.17 | 25.33 | 22.89 |
| 7812 | 35.56 | 34.45 | 30.11 | 25.29 | 22.88 |
| 7814 | 35.59 | 34.49 | 30.17 | 25.33 | 22.91 |
| 7816 | 35.57 | 34.49 | 30.16 | 25.34 | 22.92 |
| 7818 | 35.54 | 34.46 | 30.14 | 25.31 | 22.89 |
| 7820 | 35.58 | 34.5  | 30.17 | 25.34 | 22.93 |
| 7822 | 35.55 | 34.48 | 30.15 | 25.34 | 22.93 |
| 7824 | 35.51 | 34.43 | 30.11 | 25.31 | 22.89 |
| 7826 | 35.49 | 34.42 | 30.11 | 25.3  | 22.88 |
| 7828 | 35.48 | 34.41 | 30.11 | 25.31 | 22.88 |
| 7830 | 35.49 | 34.43 | 30.13 | 25.34 | 22.9  |
| 7832 | 35.45 | 34.4  | 30.1  | 25.31 | 22.89 |
| 7834 | 35.45 | 34.4  | 30.1  | 25.33 | 22.9  |
| 7836 | 35.42 | 34.38 | 30.09 | 25.31 | 22.89 |
| 7838 | 35.44 | 34.4  | 30.12 | 25.35 | 22.91 |
| 7840 | 35.42 | 34.39 | 30.12 | 25.34 | 22.91 |
| 7842 | 35.38 | 34.36 | 30.09 | 25.3  | 22.88 |
| 7844 | 35.36 | 34.34 | 30.07 | 25.29 | 22.88 |
| 7846 | 35.34 | 34.32 | 30.06 | 25.29 | 22.88 |
| 7848 | 35.35 | 34.35 | 30.09 | 25.31 | 22.9  |
| 7850 | 35.32 | 34.33 | 30.07 | 25.3  | 22.88 |
| 7852 | 35.3  | 34.3  | 30.05 | 25.29 | 22.87 |
| 7854 | 35.29 | 34.29 | 30.05 | 25.29 | 22.88 |
| 7856 | 35.28 | 34.28 | 30.04 | 25.28 | 22.87 |
| 7858 | 35.27 | 34.28 | 30.04 | 25.28 | 22.88 |
| 7860 | 35.26 | 34.27 | 30.04 | 25.29 | 22.87 |
| 7862 | 35.24 | 34.27 | 30.03 | 25.29 | 22.87 |
| 7864 | 35.24 | 34.26 | 30.04 | 25.29 | 22.87 |
| 7866 | 35.23 | 34.26 | 30.03 | 25.28 | 22.88 |
| 7868 | 35.23 | 34.27 | 30.05 | 25.3  | 22.89 |
| 7870 | 35.2  | 34.24 | 30.02 | 25.29 | 22.87 |
| 7872 | 35.18 | 34.22 | 30.02 | 25.29 | 22.87 |
| 7874 | 35.15 | 34.18 | 30    | 25.27 | 22.85 |
| 7876 | 35.15 | 34.19 | 30    | 25.26 | 22.86 |
| 7878 | 35.13 | 34.19 | 30    | 25.26 | 22.87 |



|      |       |       |       |       |       |
|------|-------|-------|-------|-------|-------|
| 7880 | 35.11 | 34.18 | 29.99 | 25.26 | 22.87 |
| 7882 | 35.09 | 34.16 | 29.96 | 25.24 | 22.85 |
| 7884 | 35.09 | 34.16 | 29.98 | 25.25 | 22.87 |
| 7886 | 35.08 | 34.15 | 29.98 | 25.27 | 22.87 |
| 7888 | 35.1  | 34.19 | 30.01 | 25.3  | 22.91 |
| 7890 | 35.05 | 34.14 | 29.97 | 25.25 | 22.86 |
| 7892 | 35.05 | 34.13 | 29.97 | 25.26 | 22.86 |
| 7894 | 35.03 | 34.13 | 29.96 | 25.27 | 22.87 |
| 7896 | 34.99 | 34.08 | 29.91 | 25.22 | 22.83 |
| 7898 | 35    | 34.11 | 29.97 | 25.27 | 22.88 |
| 7900 | 34.99 | 34.09 | 29.95 | 25.26 | 22.87 |
| 7902 | 34.98 | 34.09 | 29.95 | 25.26 | 22.86 |
| 7904 | 34.95 | 34.08 | 29.93 | 25.26 | 22.85 |
| 7906 | 34.95 | 34.07 | 29.94 | 25.26 | 22.86 |
| 7908 | 34.93 | 34.06 | 29.94 | 25.24 | 22.86 |
| 7910 | 34.91 | 34.05 | 29.93 | 25.24 | 22.86 |
| 7912 | 34.87 | 34.02 | 29.89 | 25.21 | 22.84 |
| 7914 | 34.87 | 34.02 | 29.9  | 25.23 | 22.84 |
| 7916 | 34.85 | 34    | 29.89 | 25.22 | 22.85 |
| 7918 | 34.83 | 33.99 | 29.88 | 25.22 | 22.84 |
| 7920 | 34.85 | 34.01 | 29.91 | 25.24 | 22.85 |
| 7922 | 34.82 | 33.99 | 29.88 | 25.22 | 22.83 |
| 7924 | 34.78 | 33.95 | 29.84 | 25.19 | 22.81 |
| 7926 | 34.8  | 33.97 | 29.88 | 25.23 | 22.85 |
| 7928 | 34.8  | 33.98 | 29.89 | 25.23 | 22.85 |
| 7930 | 34.79 | 33.97 | 29.88 | 25.24 | 22.85 |
| 7932 | 34.78 | 33.96 | 29.88 | 25.24 | 22.85 |
| 7934 | 34.77 | 33.95 | 29.88 | 25.24 | 22.85 |
| 7936 | 34.75 | 33.95 | 29.87 | 25.24 | 22.85 |
| 7938 | 34.74 | 33.94 | 29.87 | 25.23 | 22.85 |
| 7940 | 34.71 | 33.91 | 29.85 | 25.21 | 22.84 |
| 7942 | 34.69 | 33.89 | 29.83 | 25.2  | 22.81 |
| 7944 | 34.7  | 33.91 | 29.85 | 25.22 | 22.84 |
| 7946 | 34.69 | 33.9  | 29.84 | 25.23 | 22.85 |
| 7948 | 34.67 | 33.89 | 29.84 | 25.23 | 22.85 |
| 7950 | 34.66 | 33.88 | 29.84 | 25.23 | 22.85 |
| 7952 | 34.65 | 33.87 | 29.84 | 25.23 | 22.84 |
| 7954 | 34.63 | 33.87 | 29.83 | 25.22 | 22.84 |
| 7956 | 34.62 | 33.85 | 29.82 | 25.22 | 22.84 |
| 7958 | 34.6  | 33.84 | 29.81 | 25.21 | 22.84 |
| 7960 | 34.58 | 33.83 | 29.81 | 25.2  | 22.84 |
| 7962 | 34.57 | 33.81 | 29.8  | 25.21 | 22.84 |
| 7964 | 34.56 | 33.81 | 29.8  | 25.2  | 22.84 |
| 7966 | 34.55 | 33.8  | 29.8  | 25.19 | 22.84 |

|      |       |       |       |       |       |
|------|-------|-------|-------|-------|-------|
| 7968 | 34.51 | 33.78 | 29.78 | 25.18 | 22.82 |
| 7970 | 34.52 | 33.78 | 29.78 | 25.19 | 22.83 |
| 7972 | 34.5  | 33.78 | 29.78 | 25.19 | 22.83 |
| 7974 | 34.48 | 33.76 | 29.77 | 25.19 | 22.82 |
| 7976 | 34.48 | 33.75 | 29.76 | 25.18 | 22.82 |
| 7978 | 34.47 | 33.76 | 29.78 | 25.2  | 22.83 |
| 7980 | 34.47 | 33.75 | 29.77 | 25.2  | 22.83 |
| 7982 | 34.46 | 33.75 | 29.76 | 25.2  | 22.83 |
| 7984 | 34.44 | 33.74 | 29.76 | 25.2  | 22.83 |
| 7986 | 34.42 | 33.73 | 29.76 | 25.19 | 22.83 |
| 7988 | 34.42 | 33.72 | 29.75 | 25.19 | 22.82 |
| 7990 | 34.39 | 33.7  | 29.73 | 25.19 | 22.82 |
| 7992 | 34.39 | 33.7  | 29.75 | 25.19 | 22.83 |
| 7994 | 34.35 | 33.67 | 29.73 | 25.17 | 22.8  |
| 7996 | 34.36 | 33.67 | 29.73 | 25.17 | 22.8  |
| 7998 | 34.36 | 33.67 | 29.73 | 25.19 | 22.81 |
| 8000 | 34.31 | 33.65 | 29.71 | 25.17 | 22.78 |
| 8002 | 34.31 | 33.65 | 29.7  | 25.16 | 22.8  |
| 8004 | 34.32 | 33.65 | 29.72 | 25.18 | 22.82 |
| 8006 | 34.31 | 33.63 | 29.7  | 25.17 | 22.8  |
| 8008 | 34.24 | 33.57 | 29.65 | 25.13 | 22.77 |
| 8010 | 34.21 | 33.56 | 29.65 | 25.12 | 22.77 |
| 8012 | 34.24 | 33.59 | 29.68 | 25.14 | 22.78 |
| 8014 | 34.22 | 33.58 | 29.67 | 25.12 | 22.79 |
| 8016 | 34.21 | 33.57 | 29.66 | 25.14 | 22.79 |
| 8018 | 34.22 | 33.59 | 29.68 | 25.16 | 22.82 |
| 8020 | 34.19 | 33.55 | 29.66 | 25.13 | 22.79 |
| 8022 | 34.18 | 33.55 | 29.66 | 25.15 | 22.81 |
| 8024 | 34.17 | 33.54 | 29.66 | 25.14 | 22.8  |
| 8026 | 34.17 | 33.56 | 29.67 | 25.16 | 22.81 |
| 8028 | 34.17 | 33.56 | 29.67 | 25.17 | 22.81 |
| 8030 | 34.1  | 33.49 | 29.61 | 25.12 | 22.76 |
| 8032 | 34.06 | 33.45 | 29.58 | 25.07 | 22.71 |
| 8034 | 34.09 | 33.49 | 29.62 | 25.12 | 22.77 |
| 8036 | 34.06 | 33.46 | 29.59 | 25.1  | 22.76 |
| 8038 | 34.06 | 33.46 | 29.59 | 25.11 | 22.76 |
| 8040 | 34.05 | 33.45 | 29.6  | 25.11 | 22.76 |
| 8042 | 34.08 | 33.49 | 29.63 | 25.15 | 22.81 |
| 8044 | 34.01 | 33.44 | 29.58 | 25.1  | 22.77 |
| 8046 | 34    | 33.42 | 29.58 | 25.09 | 22.76 |
| 8048 | 34.03 | 33.45 | 29.61 | 25.13 | 22.78 |
| 8050 | 34    | 33.43 | 29.6  | 25.14 | 22.79 |
| 8052 | 33.95 | 33.39 | 29.56 | 25.08 | 22.76 |
| 8054 | 33.96 | 33.4  | 29.57 | 25.09 | 22.76 |

|      |       |       |       |       |       |
|------|-------|-------|-------|-------|-------|
| 8056 | 33.97 | 33.42 | 29.59 | 25.12 | 22.78 |
| 8058 | 33.99 | 33.43 | 29.61 | 25.15 | 22.81 |
| 8060 | 33.96 | 33.41 | 29.6  | 25.14 | 22.81 |
| 8062 | 33.9  | 33.36 | 29.55 | 25.09 | 22.75 |
| 8064 | 33.91 | 33.37 | 29.56 | 25.11 | 22.77 |
| 8066 | 33.93 | 33.39 | 29.58 | 25.12 | 22.78 |
| 8068 | 33.94 | 33.4  | 29.59 | 25.14 | 22.8  |
| 8070 | 33.9  | 33.37 | 29.57 | 25.13 | 22.8  |
| 8072 | 33.89 | 33.37 | 29.58 | 25.13 | 22.8  |
| 8074 | 33.87 | 33.36 | 29.57 | 25.12 | 22.81 |
| 8076 | 33.84 | 33.32 | 29.53 | 25.08 | 22.76 |
| 8078 | 33.81 | 33.29 | 29.52 | 25.08 | 22.75 |
| 8080 | 33.78 | 33.28 | 29.5  | 25.06 | 22.73 |
| 8082 | 33.83 | 33.32 | 29.54 | 25.11 | 22.79 |
| 8084 | 33.79 | 33.29 | 29.51 | 25.08 | 22.78 |
| 8086 | 33.77 | 33.27 | 29.5  | 25.09 | 22.77 |
| 8088 | 33.8  | 33.31 | 29.54 | 25.13 | 22.79 |
| 8090 | 33.79 | 33.3  | 29.54 | 25.12 | 22.79 |
| 8092 | 33.74 | 33.26 | 29.49 | 25.09 | 22.76 |
| 8094 | 33.73 | 33.25 | 29.5  | 25.1  | 22.77 |
| 8096 | 33.76 | 33.28 | 29.54 | 25.13 | 22.8  |
| 8098 | 33.72 | 33.24 | 29.51 | 25.1  | 22.77 |
| 8100 | 33.71 | 33.24 | 29.51 | 25.09 | 22.77 |
| 8102 | 33.67 | 33.21 | 29.48 | 25.07 | 22.76 |
| 8104 | 33.64 | 33.18 | 29.46 | 25.06 | 22.75 |
| 8106 | 33.66 | 33.21 | 29.49 | 25.1  | 22.77 |
| 8108 | 33.62 | 33.19 | 29.47 | 25.07 | 22.75 |
| 8110 | 33.63 | 33.2  | 29.49 | 25.09 | 22.78 |
| 8112 | 33.65 | 33.2  | 29.48 | 25.1  | 22.79 |
| 8114 | 33.62 | 33.18 | 29.47 | 25.09 | 22.78 |
| 8116 | 33.63 | 33.19 | 29.49 | 25.1  | 22.79 |
| 8118 | 33.61 | 33.19 | 29.47 | 25.08 | 22.76 |
| 8120 | 33.57 | 33.16 | 29.45 | 25.08 | 22.75 |
| 8122 | 33.57 | 33.16 | 29.45 | 25.08 | 22.77 |
| 8124 | 33.54 | 33.12 | 29.42 | 25.07 | 22.75 |
| 8126 | 33.51 | 33.1  | 29.41 | 25.06 | 22.74 |
| 8128 | 33.53 | 33.12 | 29.45 | 25.08 | 22.74 |
| 8130 | 33.51 | 33.13 | 29.45 | 25.09 | 22.76 |
| 8132 | 33.52 | 33.13 | 29.45 | 25.09 | 22.78 |
| 8134 | 33.46 | 33.07 | 29.4  | 25.03 | 22.73 |
| 8136 | 33.47 | 33.09 | 29.42 | 25.05 | 22.75 |
| 8138 | 33.47 | 33.09 | 29.42 | 25.07 | 22.77 |
| 8140 | 33.41 | 33.04 | 29.37 | 25.02 | 22.73 |
| 8142 | 33.4  | 33.02 | 29.37 | 25.02 | 22.72 |

|      |       |       |       |       |       |
|------|-------|-------|-------|-------|-------|
| 8144 | 33.39 | 33.02 | 29.37 | 25.02 | 22.72 |
| 8146 | 33.38 | 33.01 | 29.36 | 25.02 | 22.72 |
| 8148 | 33.36 | 32.99 | 29.34 | 25    | 22.7  |
| 8150 | 33.36 | 33    | 29.36 | 25.02 | 22.71 |
| 8152 | 33.36 | 32.99 | 29.36 | 25.03 | 22.71 |
| 8154 | 33.34 | 32.99 | 29.35 | 25.02 | 22.71 |
| 8156 | 33.33 | 32.98 | 29.35 | 25.02 | 22.71 |
| 8158 | 33.32 | 32.98 | 29.34 | 25.02 | 22.71 |
| 8160 | 33.31 | 32.96 | 29.34 | 25.02 | 22.71 |
| 8162 | 33.32 | 32.99 | 29.36 | 25.03 | 22.73 |
| 8164 | 33.31 | 32.97 | 29.36 | 25.04 | 22.74 |
| 8166 | 33.27 | 32.95 | 29.34 | 25.02 | 22.72 |
| 8168 | 33.25 | 32.93 | 29.32 | 25    | 22.7  |
| 8170 | 33.26 | 32.94 | 29.34 | 25.01 | 22.71 |
| 8172 | 33.25 | 32.94 | 29.33 | 25.03 | 22.74 |
| 8174 | 33.23 | 32.92 | 29.32 | 25    | 22.71 |
| 8176 | 33.25 | 32.95 | 29.35 | 25.04 | 22.75 |
| 8178 | 33.26 | 32.96 | 29.36 | 25.06 | 22.77 |
| 8180 | 33.23 | 32.93 | 29.33 | 25.05 | 22.75 |
| 8182 | 33.2  | 32.91 | 29.32 | 25.03 | 22.73 |
| 8184 | 33.2  | 32.91 | 29.32 | 25.02 | 22.73 |
| 8186 | 33.16 | 32.86 | 29.29 | 25.01 | 22.71 |
| 8188 | 33.15 | 32.87 | 29.28 | 25.01 | 22.71 |
| 8190 | 33.17 | 32.89 | 29.32 | 25.05 | 22.75 |
| 8192 | 33.15 | 32.88 | 29.3  | 25.02 | 22.73 |
| 8194 | 33.1  | 32.85 | 29.27 | 24.99 | 22.7  |
| 8196 | 33.13 | 32.89 | 29.32 | 25.03 | 22.75 |
| 8198 | 33.09 | 32.84 | 29.27 | 25    | 22.71 |
| 8200 | 33.06 | 32.81 | 29.25 | 24.98 | 22.69 |
| 8202 | 33.07 | 32.82 | 29.27 | 24.99 | 22.7  |
| 8204 | 33.04 | 32.8  | 29.24 | 24.98 | 22.69 |
| 8206 | 33.03 | 32.79 | 29.25 | 24.98 | 22.71 |
| 8208 | 33.07 | 32.83 | 29.29 | 25.02 | 22.74 |
| 8210 | 33.06 | 32.82 | 29.28 | 25.03 | 22.74 |
| 8212 | 33.04 | 32.81 | 29.27 | 25.02 | 22.72 |
| 8214 | 33.02 | 32.79 | 29.26 | 25.01 | 22.72 |
| 8216 | 33.02 | 32.8  | 29.28 | 25.01 | 22.73 |
| 8218 | 33.01 | 32.79 | 29.28 | 25.03 | 22.74 |
| 8220 | 33.01 | 32.8  | 29.27 | 25.03 | 22.73 |
| 8222 | 33.01 | 32.8  | 29.28 | 25.04 | 22.75 |
| 8224 | 32.98 | 32.78 | 29.25 | 25.01 | 22.73 |
| 8226 | 32.93 | 32.73 | 29.21 | 24.96 | 22.69 |
| 8228 | 32.91 | 32.72 | 29.21 | 24.96 | 22.7  |
| 8230 | 32.9  | 32.73 | 29.22 | 24.99 | 22.72 |

|      |       |       |       |       |       |
|------|-------|-------|-------|-------|-------|
| 8232 | 32.92 | 32.74 | 29.23 | 25    | 22.73 |
| 8234 | 32.91 | 32.74 | 29.24 | 25.01 | 22.73 |
| 8236 | 32.87 | 32.69 | 29.19 | 24.97 | 22.7  |
| 8238 | 32.88 | 32.7  | 29.22 | 24.98 | 22.71 |
| 8240 | 32.89 | 32.72 | 29.22 | 25.01 | 22.73 |
| 8242 | 32.86 | 32.69 | 29.22 | 24.99 | 22.71 |
| 8244 | 32.83 | 32.66 | 29.18 | 24.96 | 22.68 |
| 8246 | 32.82 | 32.66 | 29.18 | 24.96 | 22.68 |
| 8248 | 32.85 | 32.69 | 29.22 | 25.01 | 22.73 |
| 8250 | 32.84 | 32.68 | 29.22 | 25.02 | 22.74 |
| 8252 | 32.83 | 32.68 | 29.22 | 25.02 | 22.74 |
| 8254 | 32.79 | 32.64 | 29.18 | 24.98 | 22.7  |
| 8256 | 32.78 | 32.65 | 29.17 | 24.98 | 22.71 |
| 8258 | 32.76 | 32.62 | 29.16 | 24.96 | 22.71 |
| 8260 | 32.76 | 32.62 | 29.16 | 24.95 | 22.69 |
| 8262 | 32.75 | 32.62 | 29.17 | 24.97 | 22.7  |
| 8264 | 32.74 | 32.61 | 29.16 | 24.97 | 22.69 |
| 8266 | 32.74 | 32.62 | 29.16 | 24.97 | 22.71 |
| 8268 | 32.7  | 32.6  | 29.15 | 24.96 | 22.69 |
| 8270 | 32.69 | 32.57 | 29.13 | 24.94 | 22.69 |
| 8272 | 32.69 | 32.57 | 29.12 | 24.94 | 22.67 |
| 8274 | 32.68 | 32.56 | 29.12 | 24.95 | 22.68 |
| 8276 | 32.69 | 32.58 | 29.14 | 24.96 | 22.69 |
| 8278 | 32.66 | 32.55 | 29.12 | 24.95 | 22.68 |
| 8280 | 32.68 | 32.57 | 29.13 | 24.96 | 22.69 |
| 8282 | 32.68 | 32.58 | 29.16 | 24.99 | 22.72 |
| 8284 | 32.66 | 32.57 | 29.14 | 24.98 | 22.71 |
| 8286 | 32.66 | 32.56 | 29.15 | 24.99 | 22.73 |
| 8288 | 32.61 | 32.53 | 29.11 | 24.95 | 22.69 |
| 8290 | 32.58 | 32.51 | 29.1  | 24.95 | 22.7  |
| 8292 | 32.58 | 32.51 | 29.1  | 24.94 | 22.7  |
| 8294 | 32.57 | 32.5  | 29.09 | 24.93 | 22.68 |

60kg445C°

|    |       |       |       |       |       |
|----|-------|-------|-------|-------|-------|
| 0  | 21.42 | 21.69 | 21.67 | 21.72 | 21.6  |
| 2  | 21.4  | 21.67 | 21.65 | 21.71 | 21.59 |
| 4  | 21.4  | 21.68 | 21.65 | 21.71 | 21.6  |
| 6  | 21.42 | 21.7  | 21.66 | 21.73 | 21.61 |
| 8  | 21.44 | 21.73 | 21.69 | 21.76 | 21.63 |
| 10 | 21.44 | 21.73 | 21.7  | 21.76 | 21.64 |
| 12 | 21.43 | 21.72 | 21.69 | 21.75 | 21.63 |
| 14 | 21.45 | 21.73 | 21.72 | 21.77 | 21.63 |
| 16 | 21.43 | 21.72 | 21.7  | 21.76 | 21.62 |
| 18 | 21.47 | 21.75 | 21.72 | 21.79 | 21.66 |
| 20 | 21.45 | 21.75 | 21.73 | 21.79 | 21.65 |

|     |       |       |       |       |       |
|-----|-------|-------|-------|-------|-------|
| 22  | 21.45 | 21.74 | 21.72 | 21.78 | 21.64 |
| 24  | 21.46 | 21.76 | 21.74 | 21.78 | 21.66 |
| 26  | 21.47 | 21.77 | 21.76 | 21.82 | 21.68 |
| 28  | 21.47 | 21.77 | 21.75 | 21.81 | 21.69 |
| 30  | 21.48 | 21.79 | 21.76 | 21.83 | 21.69 |
| 32  | 21.46 | 21.76 | 21.75 | 21.82 | 21.68 |
| 34  | 21.48 | 21.78 | 21.77 | 21.84 | 21.7  |
| 36  | 21.48 | 21.75 | 21.75 | 21.79 | 21.66 |
| 38  | 21.47 | 21.78 | 21.77 | 21.82 | 21.67 |
| 40  | 21.49 | 21.8  | 21.78 | 21.85 | 21.7  |
| 42  | 21.47 | 21.78 | 21.78 | 21.85 | 21.69 |
| 44  | 21.44 | 21.74 | 21.74 | 21.81 | 21.64 |
| 46  | 21.47 | 21.77 | 21.75 | 21.81 | 21.66 |
| 48  | 21.5  | 21.81 | 21.8  | 21.86 | 21.7  |
| 50  | 21.51 | 21.81 | 21.8  | 21.87 | 21.7  |
| 52  | 21.49 | 21.79 | 21.78 | 21.84 | 21.67 |
| 54  | 21.49 | 21.79 | 21.78 | 21.84 | 21.68 |
| 56  | 21.51 | 21.8  | 21.8  | 21.87 | 21.69 |
| 58  | 21.5  | 21.79 | 21.79 | 21.84 | 21.69 |
| 60  | 21.51 | 21.77 | 21.78 | 21.83 | 21.69 |
| 62  | 21.54 | 21.8  | 21.81 | 21.87 | 21.71 |
| 64  | 21.52 | 21.77 | 21.77 | 21.82 | 21.67 |
| 66  | 21.5  | 21.74 | 21.76 | 21.81 | 21.65 |
| 68  | 21.51 | 21.74 | 21.75 | 21.82 | 21.66 |
| 70  | 21.57 | 21.81 | 21.81 | 21.87 | 21.71 |
| 72  | 21.6  | 21.82 | 21.82 | 21.89 | 21.71 |
| 74  | 21.62 | 21.82 | 21.83 | 21.89 | 21.71 |
| 76  | 21.61 | 21.82 | 21.83 | 21.9  | 21.71 |
| 78  | 21.63 | 21.82 | 21.83 | 21.9  | 21.7  |
| 80  | 21.67 | 21.85 | 21.85 | 21.91 | 21.72 |
| 82  | 21.67 | 21.84 | 21.84 | 21.9  | 21.71 |
| 84  | 21.7  | 21.85 | 21.87 | 21.93 | 21.73 |
| 86  | 21.72 | 21.86 | 21.87 | 21.93 | 21.73 |
| 88  | 21.78 | 21.88 | 21.9  | 21.96 | 21.77 |
| 90  | 21.75 | 21.85 | 21.87 | 21.92 | 21.74 |
| 92  | 21.76 | 21.83 | 21.85 | 21.91 | 21.73 |
| 94  | 21.83 | 21.87 | 21.88 | 21.93 | 21.74 |
| 96  | 21.85 | 21.88 | 21.89 | 21.95 | 21.76 |
| 98  | 21.89 | 21.89 | 21.91 | 21.97 | 21.77 |
| 100 | 21.9  | 21.87 | 21.9  | 21.96 | 21.77 |
| 102 | 21.95 | 21.89 | 21.91 | 21.97 | 21.77 |
| 104 | 21.97 | 21.89 | 21.91 | 21.97 | 21.77 |
| 106 | 22    | 21.89 | 21.91 | 21.97 | 21.76 |
| 108 | 22.04 | 21.9  | 21.92 | 21.97 | 21.76 |

|     |       |       |       |       |       |
|-----|-------|-------|-------|-------|-------|
| 110 | 22.07 | 21.89 | 21.92 | 21.97 | 21.76 |
| 112 | 22.07 | 21.88 | 21.9  | 21.96 | 21.74 |
| 114 | 22.15 | 21.91 | 21.93 | 21.99 | 21.77 |
| 116 | 22.19 | 21.91 | 21.93 | 21.99 | 21.77 |
| 118 | 22.24 | 21.9  | 21.94 | 21.99 | 21.77 |
| 120 | 22.27 | 21.89 | 21.93 | 21.99 | 21.77 |
| 122 | 22.32 | 21.91 | 21.95 | 22    | 21.79 |
| 124 | 22.38 | 21.92 | 21.95 | 22    | 21.79 |
| 126 | 22.42 | 21.9  | 21.93 | 21.99 | 21.77 |
| 128 | 22.49 | 21.92 | 21.95 | 22.01 | 21.8  |
| 130 | 22.52 | 21.9  | 21.94 | 21.98 | 21.78 |
| 132 | 22.59 | 21.92 | 21.94 | 22    | 21.79 |
| 134 | 22.66 | 21.94 | 21.98 | 22.03 | 21.8  |
| 136 | 22.69 | 21.91 | 21.94 | 22    | 21.78 |
| 138 | 22.74 | 21.91 | 21.94 | 22    | 21.78 |
| 140 | 22.84 | 21.96 | 21.99 | 22.05 | 21.83 |
| 142 | 22.87 | 21.92 | 21.96 | 22    | 21.79 |
| 144 | 22.93 | 21.92 | 21.95 | 22    | 21.77 |
| 146 | 22.99 | 21.92 | 21.95 | 22.01 | 21.77 |
| 148 | 23.06 | 21.92 | 21.95 | 22.01 | 21.77 |
| 150 | 23.13 | 21.91 | 21.95 | 22    | 21.78 |
| 152 | 23.19 | 21.91 | 21.95 | 22    | 21.78 |
| 154 | 23.27 | 21.92 | 21.96 | 22.01 | 21.79 |
| 156 | 23.35 | 21.93 | 21.96 | 22.01 | 21.8  |
| 158 | 23.46 | 21.97 | 22    | 22.05 | 21.83 |
| 160 | 23.54 | 21.97 | 22    | 22.05 | 21.83 |
| 162 | 23.62 | 21.96 | 22    | 22.04 | 21.82 |
| 164 | 23.67 | 21.92 | 21.99 | 22.03 | 21.81 |
| 166 | 23.76 | 21.95 | 21.99 | 22.04 | 21.81 |
| 168 | 23.82 | 21.92 | 21.96 | 22.01 | 21.78 |
| 170 | 23.9  | 21.94 | 21.97 | 22.03 | 21.79 |
| 172 | 24.01 | 21.95 | 21.99 | 22.03 | 21.81 |
| 174 | 24.11 | 21.95 | 21.99 | 22.04 | 21.81 |
| 176 | 24.21 | 21.97 | 22.01 | 22.06 | 21.81 |
| 178 | 24.33 | 21.99 | 22.03 | 22.08 | 21.84 |
| 180 | 24.42 | 21.97 | 22    | 22.05 | 21.81 |
| 182 | 24.51 | 21.97 | 22.02 | 22.07 | 21.82 |
| 184 | 24.62 | 21.99 | 22.02 | 22.07 | 21.82 |
| 186 | 24.72 | 22    | 22.03 | 22.08 | 21.84 |
| 188 | 24.82 | 22    | 22.03 | 22.09 | 21.84 |
| 190 | 24.94 | 22.01 | 22.04 | 22.08 | 21.84 |
| 192 | 25.05 | 22.01 | 22.03 | 22.08 | 21.83 |
| 194 | 25.15 | 21.99 | 22.02 | 22.07 | 21.82 |
| 196 | 25.26 | 22    | 22.04 | 22.08 | 21.84 |

|     |       |       |       |       |       |
|-----|-------|-------|-------|-------|-------|
| 198 | 25.39 | 22.01 | 22.04 | 22.08 | 21.84 |
| 200 | 25.47 | 21.99 | 22.03 | 22.07 | 21.83 |
| 202 | 25.58 | 22.01 | 22.03 | 22.06 | 21.82 |
| 204 | 25.7  | 22.03 | 22.04 | 22.09 | 21.83 |
| 206 | 25.83 | 22.03 | 22.03 | 22.09 | 21.84 |
| 208 | 25.95 | 22.04 | 22.04 | 22.09 | 21.84 |
| 210 | 26.08 | 22.03 | 22.04 | 22.08 | 21.83 |
| 212 | 26.22 | 22.04 | 22.04 | 22.08 | 21.83 |
| 214 | 26.35 | 22.04 | 22.04 | 22.08 | 21.83 |
| 216 | 26.52 | 22.08 | 22.09 | 22.13 | 21.88 |
| 218 | 26.62 | 22.06 | 22.06 | 22.1  | 21.84 |
| 220 | 26.74 | 22.05 | 22.04 | 22.09 | 21.83 |
| 222 | 26.93 | 22.1  | 22.08 | 22.12 | 21.87 |
| 224 | 27.06 | 22.09 | 22.08 | 22.12 | 21.86 |
| 226 | 27.2  | 22.11 | 22.09 | 22.13 | 21.87 |
| 228 | 27.34 | 22.14 | 22.11 | 22.15 | 21.89 |
| 230 | 27.48 | 22.11 | 22.09 | 22.13 | 21.88 |
| 232 | 27.61 | 22.12 | 22.08 | 22.13 | 21.87 |
| 234 | 27.73 | 22.12 | 22.07 | 22.11 | 21.85 |
| 236 | 27.85 | 22.1  | 22.05 | 22.1  | 21.83 |
| 238 | 28.02 | 22.11 | 22.06 | 22.1  | 21.83 |
| 240 | 28.22 | 22.16 | 22.09 | 22.12 | 21.86 |
| 242 | 28.32 | 22.13 | 22.06 | 22.1  | 21.83 |
| 244 | 28.48 | 22.15 | 22.07 | 22.11 | 21.84 |
| 246 | 28.66 | 22.18 | 22.08 | 22.12 | 21.86 |
| 248 | 28.83 | 22.21 | 22.11 | 22.15 | 21.88 |
| 250 | 28.98 | 22.22 | 22.12 | 22.15 | 21.88 |
| 252 | 29.14 | 22.22 | 22.12 | 22.15 | 21.88 |
| 254 | 29.31 | 22.23 | 22.12 | 22.15 | 21.88 |
| 256 | 29.48 | 22.23 | 22.13 | 22.16 | 21.88 |
| 258 | 29.65 | 22.23 | 22.11 | 22.12 | 21.88 |
| 260 | 29.79 | 22.23 | 22.1  | 22.12 | 21.86 |
| 262 | 30.01 | 22.25 | 22.11 | 22.13 | 21.88 |
| 264 | 30.18 | 22.27 | 22.11 | 22.14 | 21.88 |
| 266 | 30.36 | 22.27 | 22.12 | 22.14 | 21.88 |
| 268 | 30.53 | 22.28 | 22.12 | 22.13 | 21.88 |
| 270 | 30.71 | 22.3  | 22.12 | 22.13 | 21.87 |
| 272 | 30.89 | 22.32 | 22.11 | 22.13 | 21.87 |
| 274 | 31.06 | 22.33 | 22.11 | 22.13 | 21.88 |
| 276 | 31.24 | 22.34 | 22.11 | 22.13 | 21.88 |
| 278 | 31.42 | 22.31 | 22.08 | 22.1  | 21.84 |
| 280 | 31.63 | 22.36 | 22.11 | 22.13 | 21.87 |
| 282 | 31.84 | 22.41 | 22.14 | 22.15 | 21.89 |
| 284 | 32    | 22.39 | 22.11 | 22.12 | 21.86 |



|     |       |       |       |       |       |
|-----|-------|-------|-------|-------|-------|
| 286 | 32.21 | 22.42 | 22.12 | 22.12 | 21.87 |
| 288 | 32.41 | 22.43 | 22.12 | 22.13 | 21.87 |
| 290 | 32.6  | 22.46 | 22.12 | 22.13 | 21.87 |
| 292 | 32.79 | 22.47 | 22.13 | 22.14 | 21.87 |
| 294 | 32.99 | 22.49 | 22.13 | 22.14 | 21.87 |
| 296 | 33.21 | 22.51 | 22.12 | 22.14 | 21.87 |
| 298 | 33.41 | 22.52 | 22.13 | 22.14 | 21.87 |
| 300 | 33.64 | 22.58 | 22.16 | 22.18 | 21.91 |
| 302 | 33.87 | 22.57 | 22.14 | 22.16 | 21.89 |
| 304 | 34.08 | 22.6  | 22.14 | 22.17 | 21.88 |
| 306 | 34.27 | 22.61 | 22.14 | 22.14 | 21.88 |
| 308 | 34.51 | 22.66 | 22.17 | 22.18 | 21.91 |
| 310 | 34.77 | 22.71 | 22.19 | 22.19 | 21.93 |
| 312 | 34.93 | 22.69 | 22.15 | 22.14 | 21.88 |
| 314 | 35.15 | 22.73 | 22.16 | 22.16 | 21.91 |
| 316 | 35.35 | 22.74 | 22.18 | 22.17 | 21.91 |
| 318 | 35.61 | 22.78 | 22.17 | 22.16 | 21.91 |
| 320 | 35.84 | 22.83 | 22.2  | 22.19 | 21.93 |
| 322 | 36.05 | 22.84 | 22.19 | 22.18 | 21.92 |
| 324 | 36.28 | 22.87 | 22.2  | 22.19 | 21.93 |
| 326 | 36.52 | 22.89 | 22.21 | 22.19 | 21.93 |
| 328 | 36.71 | 22.89 | 22.16 | 22.15 | 21.9  |
| 330 | 36.93 | 22.93 | 22.17 | 22.17 | 21.91 |
| 332 | 37.17 | 22.99 | 22.2  | 22.19 | 21.92 |
| 334 | 37.43 | 23.02 | 22.21 | 22.18 | 21.91 |
| 336 | 37.66 | 23.06 | 22.22 | 22.2  | 21.93 |
| 338 | 37.89 | 23.1  | 22.23 | 22.21 | 21.93 |
| 340 | 38.11 | 23.12 | 22.23 | 22.21 | 21.93 |
| 342 | 38.35 | 23.15 | 22.22 | 22.19 | 21.92 |
| 344 | 38.58 | 23.2  | 22.23 | 22.2  | 21.93 |
| 346 | 38.81 | 23.23 | 22.23 | 22.2  | 21.93 |
| 348 | 39.04 | 23.26 | 22.24 | 22.2  | 21.93 |
| 350 | 39.31 | 23.29 | 22.24 | 22.21 | 21.93 |
| 352 | 39.53 | 23.33 | 22.25 | 22.21 | 21.93 |
| 354 | 39.75 | 23.37 | 22.26 | 22.2  | 21.93 |
| 356 | 40.01 | 23.44 | 22.29 | 22.25 | 21.98 |
| 358 | 40.28 | 23.49 | 22.31 | 22.25 | 21.98 |
| 360 | 40.47 | 23.49 | 22.27 | 22.22 | 21.96 |
| 362 | 40.68 | 23.51 | 22.26 | 22.2  | 21.93 |
| 364 | 40.91 | 23.55 | 22.27 | 22.2  | 21.94 |
| 366 | 41.18 | 23.6  | 22.27 | 22.2  | 21.93 |
| 368 | 41.44 | 23.67 | 22.3  | 22.24 | 21.97 |
| 370 | 41.65 | 23.68 | 22.28 | 22.2  | 21.94 |
| 372 | 41.87 | 23.71 | 22.29 | 22.2  | 21.94 |

|     |       |       |       |       |       |
|-----|-------|-------|-------|-------|-------|
| 374 | 42.14 | 23.76 | 22.29 | 22.21 | 21.94 |
| 376 | 42.37 | 23.81 | 22.3  | 22.21 | 21.94 |
| 378 | 42.6  | 23.86 | 22.31 | 22.23 | 21.96 |
| 380 | 42.83 | 23.93 | 22.33 | 22.24 | 21.97 |
| 382 | 43.08 | 23.96 | 22.32 | 22.22 | 21.96 |
| 384 | 43.3  | 23.97 | 22.31 | 22.19 | 21.94 |
| 386 | 43.53 | 24.03 | 22.32 | 22.21 | 21.94 |
| 388 | 43.78 | 24.11 | 22.37 | 22.24 | 21.97 |
| 390 | 44.01 | 24.17 | 22.38 | 22.25 | 21.97 |
| 392 | 44.29 | 24.23 | 22.39 | 22.26 | 21.99 |
| 394 | 44.54 | 24.31 | 22.41 | 22.29 | 22    |
| 396 | 44.75 | 24.3  | 22.37 | 22.23 | 21.94 |
| 398 | 45.01 | 24.4  | 22.41 | 22.27 | 21.99 |
| 400 | 45.23 | 24.44 | 22.43 | 22.27 | 21.98 |
| 402 | 45.45 | 24.48 | 22.41 | 22.26 | 21.97 |
| 404 | 45.68 | 24.53 | 22.43 | 22.27 | 21.97 |
| 406 | 45.96 | 24.61 | 22.45 | 22.28 | 21.99 |
| 408 | 46.2  | 24.69 | 22.47 | 22.29 | 22.01 |
| 410 | 46.42 | 24.74 | 22.47 | 22.29 | 22.02 |
| 412 | 46.64 | 24.79 | 22.49 | 22.29 | 22.01 |
| 414 | 46.86 | 24.81 | 22.45 | 22.24 | 21.97 |
| 416 | 47.08 | 24.89 | 22.46 | 22.25 | 21.98 |
| 418 | 47.32 | 24.98 | 22.51 | 22.29 | 22.02 |
| 420 | 47.53 | 25.02 | 22.5  | 22.28 | 22    |
| 422 | 47.77 | 25.09 | 22.52 | 22.29 | 22    |
| 424 | 48.01 | 25.16 | 22.54 | 22.29 | 22.01 |
| 426 | 48.22 | 25.21 | 22.53 | 22.27 | 21.99 |
| 428 | 48.42 | 25.25 | 22.52 | 22.27 | 21.99 |
| 430 | 48.71 | 25.34 | 22.55 | 22.28 | 22    |
| 432 | 48.9  | 25.4  | 22.55 | 22.27 | 21.99 |
| 434 | 49.1  | 25.43 | 22.53 | 22.25 | 21.98 |
| 436 | 49.36 | 25.53 | 22.58 | 22.29 | 22    |
| 438 | 49.62 | 25.61 | 22.61 | 22.3  | 22.02 |
| 440 | 49.81 | 25.66 | 22.57 | 22.26 | 21.98 |
| 442 | 50.01 | 25.7  | 22.58 | 22.26 | 21.98 |
| 444 | 50.25 | 25.79 | 22.61 | 22.27 | 21.99 |
| 446 | 50.48 | 25.86 | 22.62 | 22.27 | 21.99 |
| 448 | 50.75 | 25.94 | 22.66 | 22.3  | 22.02 |
| 450 | 50.99 | 26.03 | 22.69 | 22.32 | 22.04 |
| 452 | 51.21 | 26.1  | 22.71 | 22.33 | 22.04 |
| 454 | 51.42 | 26.19 | 22.72 | 22.33 | 22.04 |
| 456 | 51.67 | 26.28 | 22.74 | 22.34 | 22.04 |
| 458 | 51.9  | 26.35 | 22.75 | 22.35 | 22.04 |
| 460 | 52.17 | 26.47 | 22.81 | 22.39 | 22.08 |

|     |       |       |       |       |       |
|-----|-------|-------|-------|-------|-------|
| 462 | 52.42 | 26.54 | 22.82 | 22.4  | 22.09 |
| 464 | 52.62 | 26.59 | 22.8  | 22.36 | 22.06 |
| 466 | 52.87 | 26.71 | 22.86 | 22.38 | 22.07 |
| 468 | 53.1  | 26.79 | 22.85 | 22.38 | 22.06 |
| 470 | 53.34 | 26.84 | 22.85 | 22.36 | 22.05 |
| 472 | 53.57 | 26.92 | 22.86 | 22.35 | 22.06 |
| 474 | 53.82 | 27.02 | 22.91 | 22.39 | 22.09 |
| 476 | 54.07 | 27.11 | 22.93 | 22.4  | 22.09 |
| 478 | 54.31 | 27.17 | 22.93 | 22.37 | 22.06 |
| 480 | 54.59 | 27.29 | 22.98 | 22.42 | 22.11 |
| 482 | 54.82 | 27.37 | 22.99 | 22.4  | 22.1  |
| 484 | 55.04 | 27.44 | 23.01 | 22.41 | 22.1  |
| 486 | 55.3  | 27.51 | 22.99 | 22.39 | 22.09 |
| 488 | 55.55 | 27.59 | 23.03 | 22.4  | 22.1  |
| 490 | 55.77 | 27.65 | 23.02 | 22.38 | 22.07 |
| 492 | 56.02 | 27.74 | 23.04 | 22.38 | 22.07 |
| 494 | 56.32 | 27.84 | 23.08 | 22.41 | 22.09 |
| 496 | 56.56 | 27.96 | 23.1  | 22.42 | 22.1  |
| 498 | 56.8  | 28.04 | 23.12 | 22.41 | 22.1  |
| 500 | 57.05 | 28.1  | 23.12 | 22.39 | 22.08 |
| 502 | 57.33 | 28.24 | 23.18 | 22.43 | 22.11 |
| 504 | 57.57 | 28.33 | 23.21 | 22.45 | 22.13 |
| 506 | 57.79 | 28.39 | 23.21 | 22.44 | 22.11 |
| 508 | 58    | 28.45 | 23.2  | 22.41 | 22.08 |
| 510 | 58.28 | 28.56 | 23.22 | 22.42 | 22.08 |
| 512 | 58.52 | 28.64 | 23.24 | 22.42 | 22.08 |
| 514 | 58.77 | 28.73 | 23.26 | 22.42 | 22.09 |
| 516 | 59.05 | 28.86 | 23.33 | 22.48 | 22.13 |
| 518 | 59.32 | 28.97 | 23.37 | 22.49 | 22.15 |
| 520 | 59.61 | 29.08 | 23.39 | 22.5  | 22.16 |
| 522 | 59.85 | 29.18 | 23.42 | 22.51 | 22.16 |
| 524 | 60.1  | 29.26 | 23.44 | 22.51 | 22.16 |
| 526 | 60.38 | 29.36 | 23.46 | 22.51 | 22.16 |
| 528 | 60.62 | 29.46 | 23.49 | 22.52 | 22.15 |
| 530 | 60.86 | 29.56 | 23.52 | 22.54 | 22.17 |
| 532 | 61.11 | 29.66 | 23.54 | 22.54 | 22.17 |
| 534 | 61.36 | 29.71 | 23.52 | 22.49 | 22.13 |
| 536 | 61.64 | 29.87 | 23.59 | 22.54 | 22.18 |
| 538 | 61.89 | 29.97 | 23.62 | 22.55 | 22.18 |
| 540 | 62.13 | 30.06 | 23.64 | 22.56 | 22.17 |
| 542 | 62.39 | 30.15 | 23.65 | 22.56 | 22.17 |
| 544 | 62.64 | 30.26 | 23.7  | 22.58 | 22.18 |
| 546 | 62.89 | 30.38 | 23.74 | 22.59 | 22.2  |
| 548 | 63.14 | 30.45 | 23.76 | 22.58 | 22.19 |

|     |       |       |       |       |       |
|-----|-------|-------|-------|-------|-------|
| 550 | 63.42 | 30.56 | 23.78 | 22.58 | 22.2  |
| 552 | 63.67 | 30.65 | 23.8  | 22.58 | 22.21 |
| 554 | 63.91 | 30.74 | 23.82 | 22.57 | 22.19 |
| 556 | 64.16 | 30.84 | 23.85 | 22.59 | 22.21 |
| 558 | 64.45 | 30.94 | 23.88 | 22.6  | 22.21 |
| 560 | 64.7  | 31.05 | 23.91 | 22.61 | 22.21 |
| 562 | 64.96 | 31.15 | 23.95 | 22.62 | 22.22 |
| 564 | 65.23 | 31.26 | 23.99 | 22.63 | 22.24 |
| 566 | 65.52 | 31.37 | 24.04 | 22.65 | 22.25 |
| 568 | 65.76 | 31.49 | 24.06 | 22.66 | 22.25 |
| 570 | 66.02 | 31.59 | 24.11 | 22.68 | 22.29 |
| 572 | 66.25 | 31.67 | 24.11 | 22.66 | 22.25 |
| 574 | 66.53 | 31.78 | 24.15 | 22.69 | 22.27 |
| 576 | 66.76 | 31.86 | 24.15 | 22.66 | 22.24 |
| 578 | 67    | 31.94 | 24.18 | 22.66 | 22.24 |
| 580 | 67.25 | 32.04 | 24.2  | 22.67 | 22.24 |
| 582 | 67.59 | 32.19 | 24.28 | 22.72 | 22.29 |
| 584 | 67.82 | 32.25 | 24.28 | 22.7  | 22.26 |
| 586 | 68.07 | 32.37 | 24.34 | 22.73 | 22.3  |
| 588 | 68.38 | 32.5  | 24.4  | 22.76 | 22.32 |
| 590 | 68.6  | 32.58 | 24.4  | 22.72 | 22.29 |
| 592 | 68.85 | 32.68 | 24.44 | 22.74 | 22.31 |
| 594 | 69.08 | 32.76 | 24.46 | 22.74 | 22.29 |
| 596 | 69.36 | 32.88 | 24.51 | 22.76 | 22.29 |
| 598 | 69.66 | 32.98 | 24.55 | 22.78 | 22.32 |
| 600 | 69.87 | 33.07 | 24.55 | 22.75 | 22.29 |
| 602 | 70.11 | 33.16 | 24.57 | 22.76 | 22.28 |
| 604 | 70.37 | 33.28 | 24.61 | 22.77 | 22.29 |
| 606 | 70.61 | 33.36 | 24.64 | 22.78 | 22.29 |
| 608 | 70.89 | 33.47 | 24.68 | 22.78 | 22.29 |
| 610 | 71.15 | 33.57 | 24.71 | 22.78 | 22.29 |
| 612 | 71.4  | 33.66 | 24.74 | 22.79 | 22.3  |
| 614 | 71.7  | 33.78 | 24.78 | 22.82 | 22.32 |
| 616 | 72    | 33.93 | 24.86 | 22.86 | 22.36 |
| 618 | 72.23 | 34.01 | 24.88 | 22.85 | 22.34 |
| 620 | 72.44 | 34.08 | 24.88 | 22.84 | 22.33 |
| 622 | 72.73 | 34.19 | 24.92 | 22.86 | 22.35 |
| 624 | 73    | 34.32 | 24.99 | 22.88 | 22.36 |
| 626 | 73.24 | 34.39 | 25    | 22.88 | 22.35 |
| 628 | 73.5  | 34.49 | 25.04 | 22.89 | 22.34 |
| 630 | 73.81 | 34.62 | 25.08 | 22.9  | 22.36 |
| 632 | 74.04 | 34.69 | 25.11 | 22.89 | 22.36 |
| 634 | 74.32 | 34.81 | 25.18 | 22.92 | 22.39 |
| 636 | 74.58 | 34.91 | 25.21 | 22.94 | 22.4  |

|     |       |       |       |       |       |
|-----|-------|-------|-------|-------|-------|
| 638 | 74.84 | 35    | 25.25 | 22.95 | 22.43 |
| 640 | 75.13 | 35.11 | 25.29 | 22.96 | 22.42 |
| 642 | 75.37 | 35.2  | 25.31 | 22.96 | 22.42 |
| 644 | 75.62 | 35.29 | 25.35 | 22.97 | 22.42 |
| 646 | 75.84 | 35.37 | 25.36 | 22.97 | 22.41 |
| 648 | 76.17 | 35.5  | 25.43 | 23.01 | 22.43 |
| 650 | 76.43 | 35.6  | 25.47 | 23.01 | 22.43 |
| 652 | 76.68 | 35.68 | 25.51 | 23.02 | 22.44 |
| 654 | 76.96 | 35.78 | 25.54 | 23.03 | 22.44 |
| 656 | 77.21 | 35.88 | 25.57 | 23.04 | 22.45 |
| 658 | 77.46 | 35.97 | 25.61 | 23.05 | 22.44 |
| 660 | 77.71 | 36.07 | 25.65 | 23.06 | 22.45 |
| 662 | 78    | 36.16 | 25.68 | 23.06 | 22.45 |
| 664 | 78.25 | 36.25 | 25.72 | 23.06 | 22.46 |
| 666 | 78.5  | 36.34 | 25.75 | 23.07 | 22.46 |
| 668 | 78.81 | 36.43 | 25.79 | 23.09 | 22.47 |
| 670 | 79.06 | 36.54 | 25.82 | 23.1  | 22.47 |
| 672 | 79.31 | 36.63 | 25.86 | 23.1  | 22.47 |
| 674 | 79.58 | 36.74 | 25.93 | 23.14 | 22.5  |
| 676 | 79.83 | 36.81 | 25.95 | 23.14 | 22.5  |
| 678 | 80.13 | 36.91 | 25.99 | 23.16 | 22.51 |
| 680 | 80.36 | 37.01 | 26.03 | 23.17 | 22.51 |
| 682 | 80.62 | 37.1  | 26.06 | 23.17 | 22.51 |
| 684 | 80.88 | 37.16 | 26.1  | 23.18 | 22.5  |
| 686 | 81.2  | 37.27 | 26.15 | 23.21 | 22.53 |
| 688 | 81.46 | 37.39 | 26.21 | 23.23 | 22.55 |
| 690 | 81.69 | 37.45 | 26.22 | 23.21 | 22.51 |
| 692 | 81.95 | 37.53 | 26.26 | 23.22 | 22.51 |
| 694 | 82.24 | 37.62 | 26.29 | 23.21 | 22.53 |
| 696 | 82.5  | 37.71 | 26.34 | 23.22 | 22.53 |
| 698 | 82.74 | 37.79 | 26.36 | 23.22 | 22.52 |
| 700 | 83.03 | 37.89 | 26.42 | 23.26 | 22.55 |
| 702 | 83.31 | 37.98 | 26.45 | 23.26 | 22.54 |
| 704 | 83.61 | 38.12 | 26.55 | 23.32 | 22.6  |
| 706 | 83.84 | 38.17 | 26.56 | 23.31 | 22.58 |
| 708 | 84.08 | 38.23 | 26.59 | 23.32 | 22.57 |
| 710 | 84.33 | 38.33 | 26.63 | 23.32 | 22.58 |
| 712 | 84.71 | 38.47 | 26.73 | 23.38 | 22.62 |
| 714 | 84.93 | 38.51 | 26.74 | 23.37 | 22.6  |
| 716 | 85.18 | 38.62 | 26.79 | 23.39 | 22.62 |
| 718 | 85.47 | 38.7  | 26.81 | 23.38 | 22.6  |
| 720 | 85.75 | 38.79 | 26.87 | 23.41 | 22.61 |
| 722 | 86.02 | 38.89 | 26.93 | 23.44 | 22.65 |
| 724 | 86.29 | 38.98 | 26.98 | 23.46 | 22.66 |

|     |       |       |       |       |       |
|-----|-------|-------|-------|-------|-------|
| 726 | 86.58 | 39.04 | 27    | 23.45 | 22.64 |
| 728 | 86.86 | 39.14 | 27.05 | 23.46 | 22.67 |
| 730 | 87.12 | 39.22 | 27.1  | 23.48 | 22.68 |
| 732 | 87.37 | 39.29 | 27.12 | 23.48 | 22.67 |
| 734 | 87.68 | 39.39 | 27.17 | 23.5  | 22.68 |
| 736 | 87.93 | 39.47 | 27.22 | 23.51 | 22.69 |
| 738 | 88.19 | 39.55 | 27.26 | 23.53 | 22.69 |
| 740 | 88.47 | 39.65 | 27.33 | 23.57 | 22.71 |
| 742 | 88.74 | 39.73 | 27.36 | 23.58 | 22.72 |
| 744 | 89.04 | 39.79 | 27.39 | 23.58 | 22.71 |
| 746 | 89.29 | 39.88 | 27.43 | 23.59 | 22.72 |
| 748 | 89.55 | 39.96 | 27.48 | 23.61 | 22.71 |
| 750 | 89.81 | 40.04 | 27.52 | 23.62 | 22.72 |
| 752 | 90.11 | 40.13 | 27.56 | 23.63 | 22.73 |
| 754 | 90.37 | 40.21 | 27.61 | 23.64 | 22.74 |
| 756 | 90.63 | 40.27 | 27.65 | 23.65 | 22.74 |
| 758 | 90.94 | 40.34 | 27.68 | 23.65 | 22.74 |
| 760 | 91.21 | 40.44 | 27.73 | 23.67 | 22.75 |
| 762 | 91.47 | 40.51 | 27.77 | 23.69 | 22.76 |
| 764 | 91.73 | 40.58 | 27.81 | 23.7  | 22.76 |
| 766 | 92.03 | 40.66 | 27.85 | 23.72 | 22.77 |
| 768 | 92.3  | 40.75 | 27.91 | 23.73 | 22.78 |
| 770 | 92.57 | 40.83 | 27.95 | 23.75 | 22.78 |
| 772 | 92.83 | 40.9  | 27.99 | 23.77 | 22.79 |
| 774 | 93.14 | 40.98 | 28.03 | 23.78 | 22.79 |
| 776 | 93.4  | 41.06 | 28.08 | 23.79 | 22.79 |
| 778 | 93.67 | 41.15 | 28.15 | 23.83 | 22.82 |
| 780 | 93.96 | 41.23 | 28.21 | 23.87 | 22.86 |
| 782 | 94.26 | 41.3  | 28.24 | 23.86 | 22.85 |
| 784 | 94.51 | 41.36 | 28.27 | 23.85 | 22.83 |
| 786 | 94.82 | 41.45 | 28.33 | 23.89 | 22.88 |
| 788 | 95.07 | 41.51 | 28.37 | 23.9  | 22.88 |
| 790 | 95.36 | 41.57 | 28.39 | 23.88 | 22.85 |
| 792 | 95.64 | 41.66 | 28.46 | 23.92 | 22.88 |
| 794 | 95.88 | 41.71 | 28.47 | 23.93 | 22.86 |
| 796 | 96.18 | 41.82 | 28.55 | 23.97 | 22.89 |
| 798 | 96.53 | 41.93 | 28.63 | 24.01 | 22.93 |
| 800 | 96.81 | 42    | 28.67 | 24.02 | 22.94 |
| 802 | 97.02 | 42.01 | 28.66 | 23.99 | 22.9  |
| 804 | 97.33 | 42.08 | 28.7  | 24.02 | 22.9  |
| 806 | 97.59 | 42.16 | 28.74 | 24.02 | 22.89 |
| 808 | 97.9  | 42.26 | 28.83 | 24.07 | 22.93 |
| 810 | 98.17 | 42.33 | 28.88 | 24.09 | 22.97 |
| 812 | 98.45 | 42.39 | 28.92 | 24.09 | 22.97 |

|     |        |       |       |       |       |
|-----|--------|-------|-------|-------|-------|
| 814 | 98.69  | 42.45 | 28.96 | 24.11 | 22.97 |
| 816 | 99.03  | 42.55 | 29.01 | 24.13 | 22.99 |
| 818 | 99.31  | 42.62 | 29.06 | 24.16 | 23    |
| 820 | 99.56  | 42.65 | 29.09 | 24.14 | 22.97 |
| 822 | 99.9   | 42.74 | 29.15 | 24.19 | 23.01 |
| 824 | 100.17 | 42.83 | 29.21 | 24.22 | 23.02 |
| 826 | 100.43 | 42.89 | 29.26 | 24.24 | 23.03 |
| 828 | 100.67 | 42.93 | 29.28 | 24.23 | 23.01 |
| 830 | 101.01 | 43.01 | 29.35 | 24.27 | 23.03 |
| 832 | 101.29 | 43.08 | 29.38 | 24.29 | 23.04 |
| 834 | 101.56 | 43.14 | 29.43 | 24.29 | 23.04 |
| 836 | 101.85 | 43.21 | 29.49 | 24.31 | 23.07 |
| 838 | 102.15 | 43.27 | 29.53 | 24.32 | 23.06 |
| 840 | 102.41 | 43.3  | 29.54 | 24.29 | 23.04 |
| 842 | 102.7  | 43.37 | 29.59 | 24.31 | 23.04 |
| 844 | 102.96 | 43.42 | 29.63 | 24.32 | 23.04 |
| 846 | 103.25 | 43.51 | 29.69 | 24.36 | 23.07 |
| 848 | 103.55 | 43.58 | 29.73 | 24.36 | 23.05 |
| 850 | 103.79 | 43.61 | 29.74 | 24.37 | 23.05 |
| 852 | 104.1  | 43.7  | 29.83 | 24.43 | 23.09 |
| 854 | 104.42 | 43.76 | 29.88 | 24.45 | 23.1  |
| 856 | 104.71 | 43.84 | 29.94 | 24.46 | 23.11 |
| 858 | 105.01 | 43.91 | 30    | 24.49 | 23.14 |
| 860 | 105.29 | 43.97 | 30.04 | 24.51 | 23.14 |
| 862 | 105.61 | 44.05 | 30.09 | 24.53 | 23.15 |
| 864 | 105.87 | 44.09 | 30.13 | 24.54 | 23.14 |
| 866 | 106.15 | 44.15 | 30.17 | 24.56 | 23.15 |
| 868 | 106.43 | 44.19 | 30.2  | 24.55 | 23.15 |
| 870 | 106.75 | 44.23 | 30.23 | 24.55 | 23.15 |
| 872 | 107.06 | 44.35 | 30.31 | 24.6  | 23.18 |
| 874 | 107.33 | 44.39 | 30.35 | 24.62 | 23.19 |
| 876 | 107.61 | 44.45 | 30.39 | 24.64 | 23.2  |
| 878 | 107.93 | 44.49 | 30.41 | 24.63 | 23.19 |
| 880 | 108.21 | 44.57 | 30.49 | 24.67 | 23.2  |
| 882 | 108.49 | 44.64 | 30.54 | 24.71 | 23.22 |
| 884 | 108.79 | 44.72 | 30.61 | 24.75 | 23.26 |
| 886 | 109.1  | 44.77 | 30.64 | 24.75 | 23.25 |
| 888 | 109.4  | 44.83 | 30.7  | 24.78 | 23.27 |
| 890 | 109.68 | 44.88 | 30.73 | 24.78 | 23.25 |
| 892 | 109.96 | 44.93 | 30.77 | 24.8  | 23.26 |
| 894 | 110.29 | 44.99 | 30.81 | 24.81 | 23.27 |
| 896 | 110.58 | 45.05 | 30.85 | 24.84 | 23.3  |
| 898 | 110.86 | 45.1  | 30.9  | 24.84 | 23.28 |
| 900 | 111.14 | 45.15 | 30.94 | 24.86 | 23.3  |

|     |        |       |       |       |       |
|-----|--------|-------|-------|-------|-------|
| 902 | 111.46 | 45.18 | 30.95 | 24.85 | 23.27 |
| 904 | 111.76 | 45.26 | 31.03 | 24.9  | 23.3  |
| 906 | 112.04 | 45.32 | 31.08 | 24.92 | 23.32 |
| 908 | 112.37 | 45.43 | 31.18 | 25    | 23.37 |
| 910 | 112.72 | 45.49 | 31.22 | 25.01 | 23.38 |
| 912 | 112.97 | 45.51 | 31.24 | 25.02 | 23.36 |
| 914 | 113.28 | 45.58 | 31.3  | 25.04 | 23.39 |
| 916 | 113.59 | 45.63 | 31.34 | 25.05 | 23.38 |
| 918 | 113.85 | 45.65 | 31.35 | 25.04 | 23.36 |
| 920 | 114.15 | 45.74 | 31.42 | 25.09 | 23.4  |
| 922 | 114.42 | 45.77 | 31.45 | 25.09 | 23.38 |
| 924 | 114.71 | 45.81 | 31.49 | 25.09 | 23.39 |
| 926 | 115.08 | 45.9  | 31.56 | 25.12 | 23.42 |
| 928 | 115.41 | 45.98 | 31.64 | 25.18 | 23.47 |
| 930 | 115.71 | 46.03 | 31.68 | 25.2  | 23.47 |
| 932 | 116.05 | 46.09 | 31.73 | 25.22 | 23.48 |
| 934 | 116.35 | 46.14 | 31.77 | 25.24 | 23.5  |
| 936 | 116.64 | 46.2  | 31.82 | 25.26 | 23.51 |
| 938 | 116.93 | 46.25 | 31.87 | 25.28 | 23.51 |
| 940 | 117.2  | 46.28 | 31.89 | 25.28 | 23.5  |
| 942 | 117.47 | 46.3  | 31.91 | 25.28 | 23.48 |
| 944 | 117.82 | 46.37 | 31.98 | 25.32 | 23.52 |
| 946 | 118.14 | 46.45 | 32.04 | 25.36 | 23.55 |
| 948 | 118.42 | 46.48 | 32.07 | 25.37 | 23.54 |
| 950 | 118.82 | 46.58 | 32.16 | 25.44 | 23.6  |
| 952 | 119.1  | 46.62 | 32.19 | 25.44 | 23.58 |
| 954 | 119.38 | 46.65 | 32.21 | 25.44 | 23.58 |
| 956 | 119.69 | 46.71 | 32.27 | 25.47 | 23.6  |
| 958 | 120.05 | 46.79 | 32.35 | 25.52 | 23.63 |
| 960 | 120.35 | 46.84 | 32.41 | 25.54 | 23.64 |
| 962 | 120.61 | 46.87 | 32.41 | 25.54 | 23.62 |
| 964 | 120.92 | 46.94 | 32.47 | 25.58 | 23.67 |
| 966 | 121.3  | 47.01 | 32.54 | 25.61 | 23.69 |
| 968 | 121.58 | 47.03 | 32.56 | 25.6  | 23.66 |
| 970 | 121.88 | 47.08 | 32.61 | 25.64 | 23.69 |
| 972 | 122.2  | 47.14 | 32.68 | 25.68 | 23.72 |
| 974 | 122.56 | 47.2  | 32.73 | 25.7  | 23.74 |
| 976 | 122.82 | 47.23 | 32.75 | 25.69 | 23.72 |
| 978 | 123.14 | 47.28 | 32.8  | 25.72 | 23.73 |
| 980 | 123.41 | 47.32 | 32.82 | 25.74 | 23.74 |
| 982 | 123.77 | 47.38 | 32.88 | 25.76 | 23.75 |
| 984 | 124.06 | 47.41 | 32.92 | 25.76 | 23.74 |
| 986 | 124.39 | 47.47 | 32.98 | 25.8  | 23.76 |
| 988 | 124.74 | 47.54 | 33.05 | 25.85 | 23.81 |



|      |        |       |       |       |       |
|------|--------|-------|-------|-------|-------|
| 990  | 125.03 | 47.56 | 33.08 | 25.86 | 23.81 |
| 992  | 125.39 | 47.63 | 33.14 | 25.88 | 23.81 |
| 994  | 125.69 | 47.68 | 33.19 | 25.91 | 23.84 |
| 996  | 125.99 | 47.72 | 33.23 | 25.93 | 23.84 |
| 998  | 126.34 | 47.76 | 33.27 | 25.93 | 23.86 |
| 1000 | 126.64 | 47.81 | 33.32 | 25.96 | 23.87 |
| 1002 | 126.94 | 47.87 | 33.38 | 25.98 | 23.89 |
| 1004 | 127.24 | 47.9  | 33.41 | 26    | 23.89 |
| 1006 | 127.59 | 47.94 | 33.45 | 26.02 | 23.9  |
| 1008 | 127.87 | 47.96 | 33.47 | 26    | 23.88 |
| 1010 | 128.21 | 48.03 | 33.53 | 26.06 | 23.91 |
| 1012 | 128.51 | 48.08 | 33.58 | 26.09 | 23.93 |
| 1014 | 128.87 | 48.13 | 33.63 | 26.11 | 23.93 |
| 1016 | 129.17 | 48.18 | 33.68 | 26.14 | 23.94 |
| 1018 | 129.46 | 48.2  | 33.72 | 26.15 | 23.95 |
| 1020 | 129.76 | 48.26 | 33.76 | 26.16 | 23.95 |
| 1022 | 130.14 | 48.31 | 33.81 | 26.21 | 23.97 |
| 1024 | 130.43 | 48.32 | 33.82 | 26.18 | 23.93 |
| 1026 | 130.76 | 48.4  | 33.9  | 26.24 | 23.98 |
| 1028 | 131.07 | 48.44 | 33.94 | 26.25 | 23.99 |
| 1030 | 131.42 | 48.48 | 33.98 | 26.27 | 24    |
| 1032 | 131.73 | 48.55 | 34.04 | 26.32 | 24.03 |
| 1034 | 132.04 | 48.58 | 34.06 | 26.33 | 24.02 |
| 1036 | 132.35 | 48.61 | 34.11 | 26.34 | 24.04 |
| 1038 | 132.71 | 48.66 | 34.16 | 26.36 | 24.05 |
| 1040 | 133.03 | 48.71 | 34.2  | 26.38 | 24.05 |
| 1042 | 133.35 | 48.74 | 34.24 | 26.4  | 24.06 |
| 1044 | 133.65 | 48.79 | 34.28 | 26.42 | 24.08 |
| 1046 | 133.98 | 48.81 | 34.3  | 26.43 | 24.07 |
| 1048 | 134.28 | 48.84 | 34.34 | 26.43 | 24.06 |
| 1050 | 134.61 | 48.92 | 34.4  | 26.49 | 24.11 |
| 1052 | 134.92 | 48.96 | 34.45 | 26.51 | 24.12 |
| 1054 | 135.23 | 48.98 | 34.48 | 26.52 | 24.11 |
| 1056 | 135.6  | 49.05 | 34.53 | 26.54 | 24.13 |
| 1058 | 135.94 | 49.1  | 34.59 | 26.58 | 24.15 |
| 1060 | 136.26 | 49.14 | 34.62 | 26.59 | 24.16 |
| 1062 | 136.6  | 49.16 | 34.65 | 26.61 | 24.17 |
| 1064 | 136.9  | 49.21 | 34.7  | 26.63 | 24.17 |
| 1066 | 137.21 | 49.26 | 34.74 | 26.66 | 24.18 |
| 1068 | 137.51 | 49.29 | 34.78 | 26.68 | 24.2  |
| 1070 | 137.92 | 49.35 | 34.84 | 26.71 | 24.21 |
| 1072 | 138.22 | 49.39 | 34.88 | 26.72 | 24.21 |
| 1074 | 138.53 | 49.42 | 34.91 | 26.75 | 24.22 |
| 1076 | 138.83 | 49.46 | 34.95 | 26.76 | 24.23 |

|      |        |       |       |       |       |
|------|--------|-------|-------|-------|-------|
| 1078 | 139.2  | 49.5  | 34.99 | 26.78 | 24.24 |
| 1080 | 139.5  | 49.55 | 35.03 | 26.8  | 24.25 |
| 1082 | 139.8  | 49.58 | 35.06 | 26.81 | 24.26 |
| 1084 | 140.11 | 49.61 | 35.11 | 26.82 | 24.27 |
| 1086 | 140.47 | 49.68 | 35.16 | 26.86 | 24.3  |
| 1088 | 140.86 | 49.74 | 35.23 | 26.91 | 24.33 |
| 1090 | 141.16 | 49.77 | 35.26 | 26.91 | 24.32 |
| 1092 | 141.47 | 49.79 | 35.28 | 26.92 | 24.31 |
| 1094 | 141.86 | 49.85 | 35.34 | 26.97 | 24.36 |
| 1096 | 142.16 | 49.87 | 35.37 | 26.97 | 24.34 |
| 1098 | 142.5  | 49.95 | 35.44 | 27.04 | 24.39 |
| 1100 | 142.82 | 50    | 35.5  | 27.07 | 24.42 |
| 1102 | 143.18 | 50.04 | 35.54 | 27.09 | 24.42 |
| 1104 | 143.47 | 50.05 | 35.55 | 27.09 | 24.4  |
| 1106 | 143.82 | 50.11 | 35.6  | 27.11 | 24.42 |
| 1108 | 144.14 | 50.13 | 35.63 | 27.12 | 24.42 |
| 1110 | 144.46 | 50.17 | 35.68 | 27.15 | 24.44 |
| 1112 | 144.81 | 50.2  | 35.71 | 27.17 | 24.44 |
| 1114 | 145.15 | 50.26 | 35.76 | 27.19 | 24.47 |
| 1116 | 145.48 | 50.31 | 35.82 | 27.24 | 24.51 |
| 1118 | 145.83 | 50.32 | 35.85 | 27.23 | 24.5  |
| 1120 | 146.15 | 50.38 | 35.89 | 27.24 | 24.49 |
| 1122 | 146.49 | 50.43 | 35.94 | 27.28 | 24.53 |
| 1124 | 146.82 | 50.47 | 35.98 | 27.31 | 24.54 |
| 1126 | 147.19 | 50.51 | 36.02 | 27.32 | 24.54 |
| 1128 | 147.51 | 50.55 | 36.06 | 27.34 | 24.55 |
| 1130 | 147.83 | 50.59 | 36.1  | 27.37 | 24.57 |
| 1132 | 148.14 | 50.62 | 36.13 | 27.37 | 24.58 |
| 1134 | 148.51 | 50.67 | 36.16 | 27.4  | 24.57 |
| 1136 | 148.85 | 50.72 | 36.23 | 27.45 | 24.59 |
| 1138 | 149.14 | 50.74 | 36.24 | 27.46 | 24.6  |
| 1140 | 149.49 | 50.79 | 36.3  | 27.49 | 24.61 |
| 1142 | 149.87 | 50.81 | 36.33 | 27.49 | 24.6  |
| 1144 | 150.19 | 50.85 | 36.36 | 27.5  | 24.6  |
| 1146 | 150.54 | 50.91 | 36.42 | 27.55 | 24.65 |
| 1148 | 150.87 | 50.95 | 36.47 | 27.57 | 24.66 |
| 1150 | 151.25 | 50.99 | 36.5  | 27.59 | 24.67 |
| 1152 | 151.58 | 51.04 | 36.55 | 27.62 | 24.7  |
| 1154 | 151.9  | 51.07 | 36.57 | 27.62 | 24.7  |
| 1156 | 152.26 | 51.13 | 36.65 | 27.68 | 24.74 |
| 1158 | 152.62 | 51.16 | 36.67 | 27.68 | 24.73 |
| 1160 | 152.95 | 51.21 | 36.74 | 27.72 | 24.76 |
| 1162 | 153.28 | 51.25 | 36.77 | 27.73 | 24.76 |
| 1164 | 153.62 | 51.27 | 36.79 | 27.74 | 24.76 |

|      |        |       |       |       |       |
|------|--------|-------|-------|-------|-------|
| 1166 | 153.98 | 51.29 | 36.81 | 27.75 | 24.76 |
| 1168 | 154.33 | 51.35 | 36.88 | 27.78 | 24.78 |
| 1170 | 154.65 | 51.38 | 36.9  | 27.8  | 24.78 |
| 1172 | 154.97 | 51.42 | 36.93 | 27.82 | 24.79 |
| 1174 | 155.35 | 51.46 | 36.97 | 27.84 | 24.8  |
| 1176 | 155.66 | 51.5  | 37.01 | 27.87 | 24.81 |
| 1178 | 155.99 | 51.53 | 37.05 | 27.89 | 24.83 |
| 1180 | 156.31 | 51.55 | 37.09 | 27.9  | 24.83 |
| 1182 | 156.64 | 51.58 | 37.1  | 27.91 | 24.82 |
| 1184 | 157.04 | 51.63 | 37.17 | 27.95 | 24.85 |
| 1186 | 157.38 | 51.69 | 37.21 | 27.98 | 24.88 |
| 1188 | 157.72 | 51.72 | 37.25 | 28    | 24.89 |
| 1190 | 158.15 | 51.8  | 37.33 | 28.06 | 24.95 |
| 1192 | 158.47 | 51.85 | 37.37 | 28.08 | 24.95 |
| 1194 | 158.78 | 51.86 | 37.4  | 28.08 | 24.96 |
| 1196 | 159.08 | 51.86 | 37.4  | 28.07 | 24.93 |
| 1198 | 159.47 | 51.91 | 37.44 | 28.09 | 24.94 |
| 1200 | 159.82 | 51.97 | 37.5  | 28.13 | 24.97 |
| 1202 | 160.18 | 52.03 | 37.56 | 28.19 | 25.01 |
| 1204 | 160.54 | 52.08 | 37.62 | 28.22 | 25.03 |
| 1206 | 160.91 | 52.1  | 37.64 | 28.23 | 25.02 |
| 1208 | 161.22 | 52.12 | 37.66 | 28.23 | 25.02 |
| 1210 | 161.53 | 52.15 | 37.68 | 28.25 | 25.01 |
| 1212 | 161.9  | 52.23 | 37.77 | 28.31 | 25.07 |
| 1214 | 162.3  | 52.28 | 37.81 | 28.34 | 25.09 |
| 1216 | 162.64 | 52.32 | 37.85 | 28.36 | 25.09 |
| 1218 | 162.97 | 52.37 | 37.89 | 28.38 | 25.11 |
| 1220 | 163.31 | 52.4  | 37.93 | 28.4  | 25.12 |
| 1222 | 163.66 | 52.41 | 37.94 | 28.4  | 25.1  |
| 1224 | 163.94 | 52.42 | 37.94 | 28.38 | 25.08 |
| 1226 | 164.32 | 52.5  | 38.03 | 28.45 | 25.15 |
| 1228 | 164.66 | 52.54 | 38.07 | 28.47 | 25.16 |
| 1230 | 165.01 | 52.55 | 38.07 | 28.47 | 25.13 |
| 1232 | 165.36 | 52.6  | 38.12 | 28.48 | 25.14 |
| 1234 | 165.68 | 52.6  | 38.14 | 28.49 | 25.15 |
| 1236 | 166.05 | 52.67 | 38.19 | 28.53 | 25.17 |
| 1238 | 166.43 | 52.68 | 38.19 | 28.52 | 25.15 |
| 1240 | 166.76 | 52.72 | 38.23 | 28.54 | 25.16 |
| 1242 | 167.09 | 52.76 | 38.28 | 28.57 | 25.17 |
| 1244 | 167.42 | 52.79 | 38.31 | 28.6  | 25.19 |
| 1246 | 167.87 | 52.89 | 38.4  | 28.67 | 25.25 |
| 1248 | 168.16 | 52.88 | 38.4  | 28.65 | 25.22 |
| 1250 | 168.51 | 52.93 | 38.44 | 28.67 | 25.23 |
| 1252 | 168.84 | 52.96 | 38.48 | 28.69 | 25.25 |

|      |        |       |       |       |       |
|------|--------|-------|-------|-------|-------|
| 1254 | 169.19 | 53    | 38.51 | 28.71 | 25.25 |
| 1256 | 169.62 | 53.07 | 38.59 | 28.76 | 25.3  |
| 1258 | 169.95 | 53.1  | 38.62 | 28.77 | 25.32 |
| 1260 | 170.28 | 53.12 | 38.63 | 28.77 | 25.3  |
| 1262 | 170.64 | 53.18 | 38.71 | 28.82 | 25.34 |
| 1264 | 171.04 | 53.23 | 38.75 | 28.85 | 25.36 |
| 1266 | 171.34 | 53.24 | 38.76 | 28.85 | 25.33 |
| 1268 | 171.69 | 53.28 | 38.8  | 28.89 | 25.36 |
| 1270 | 172.12 | 53.34 | 38.86 | 28.92 | 25.38 |
| 1272 | 172.47 | 53.38 | 38.9  | 28.94 | 25.4  |
| 1274 | 172.81 | 53.41 | 38.92 | 28.95 | 25.39 |
| 1276 | 173.14 | 53.42 | 38.95 | 28.96 | 25.4  |
| 1278 | 173.55 | 53.49 | 38.99 | 28.98 | 25.42 |
| 1280 | 173.9  | 53.54 | 39.05 | 29.02 | 25.44 |
| 1282 | 174.24 | 53.58 | 39.08 | 29.05 | 25.45 |
| 1284 | 174.57 | 53.61 | 39.11 | 29.07 | 25.47 |
| 1286 | 174.98 | 53.65 | 39.15 | 29.09 | 25.47 |
| 1288 | 175.33 | 53.68 | 39.19 | 29.11 | 25.48 |
| 1290 | 175.68 | 53.73 | 39.22 | 29.14 | 25.49 |
| 1292 | 176.04 | 53.77 | 39.27 | 29.17 | 25.52 |
| 1294 | 176.42 | 53.79 | 39.3  | 29.18 | 25.52 |
| 1296 | 176.78 | 53.84 | 39.36 | 29.23 | 25.54 |
| 1298 | 177.11 | 53.88 | 39.38 | 29.23 | 25.54 |
| 1300 | 177.41 | 53.87 | 39.38 | 29.22 | 25.51 |
| 1302 | 177.82 | 53.92 | 39.42 | 29.25 | 25.52 |
| 1304 | 178.22 | 54.01 | 39.51 | 29.33 | 25.57 |
| 1306 | 178.56 | 54.04 | 39.54 | 29.34 | 25.59 |
| 1308 | 178.95 | 54.06 | 39.55 | 29.34 | 25.57 |
| 1310 | 179.3  | 54.11 | 39.59 | 29.36 | 25.6  |
| 1312 | 179.63 | 54.14 | 39.63 | 29.4  | 25.61 |
| 1314 | 179.98 | 54.18 | 39.67 | 29.42 | 25.62 |
| 1316 | 180.34 | 54.22 | 39.72 | 29.45 | 25.65 |
| 1318 | 180.75 | 54.27 | 39.77 | 29.48 | 25.67 |
| 1320 | 181.12 | 54.32 | 39.82 | 29.5  | 25.69 |
| 1322 | 181.5  | 54.37 | 39.87 | 29.54 | 25.73 |
| 1324 | 181.86 | 54.41 | 39.91 | 29.57 | 25.74 |
| 1326 | 182.27 | 54.43 | 39.93 | 29.59 | 25.74 |
| 1328 | 182.64 | 54.49 | 39.99 | 29.61 | 25.76 |
| 1330 | 182.98 | 54.52 | 40.03 | 29.64 | 25.77 |
| 1332 | 183.33 | 54.56 | 40.06 | 29.66 | 25.78 |
| 1334 | 183.71 | 54.58 | 40.07 | 29.66 | 25.76 |
| 1336 | 184.09 | 54.63 | 40.13 | 29.71 | 25.79 |
| 1338 | 184.45 | 54.67 | 40.18 | 29.74 | 25.81 |
| 1340 | 184.84 | 54.74 | 40.24 | 29.8  | 25.86 |

|      |        |       |       |       |       |
|------|--------|-------|-------|-------|-------|
| 1342 | 185.25 | 54.77 | 40.27 | 29.81 | 25.87 |
| 1344 | 185.6  | 54.79 | 40.28 | 29.81 | 25.85 |
| 1346 | 185.9  | 54.79 | 40.28 | 29.8  | 25.82 |
| 1348 | 186.24 | 54.81 | 40.3  | 29.82 | 25.83 |
| 1350 | 186.67 | 54.86 | 40.35 | 29.84 | 25.84 |
| 1352 | 187.03 | 54.91 | 40.4  | 29.87 | 25.85 |
| 1354 | 187.4  | 54.95 | 40.44 | 29.9  | 25.88 |
| 1356 | 187.78 | 55.01 | 40.5  | 29.93 | 25.91 |
| 1358 | 188.2  | 55.03 | 40.52 | 29.92 | 25.9  |
| 1360 | 188.56 | 55.07 | 40.57 | 29.97 | 25.93 |
| 1362 | 188.91 | 55.09 | 40.59 | 29.98 | 25.93 |
| 1364 | 189.29 | 55.15 | 40.65 | 30.02 | 25.96 |
| 1366 | 189.68 | 55.17 | 40.66 | 30.02 | 25.95 |
| 1368 | 190.03 | 55.21 | 40.7  | 30.06 | 25.98 |
| 1370 | 190.36 | 55.23 | 40.71 | 30.05 | 25.96 |
| 1372 | 190.72 | 55.27 | 40.74 | 30.08 | 25.96 |
| 1374 | 191.16 | 55.31 | 40.79 | 30.11 | 25.98 |
| 1376 | 191.54 | 55.34 | 40.81 | 30.12 | 25.98 |
| 1378 | 191.93 | 55.41 | 40.87 | 30.16 | 26.01 |
| 1380 | 192.31 | 55.47 | 40.93 | 30.2  | 26.05 |
| 1382 | 192.69 | 55.49 | 40.95 | 30.21 | 26.04 |
| 1384 | 193.03 | 55.51 | 40.97 | 30.21 | 26.04 |
| 1386 | 193.39 | 55.54 | 41    | 30.23 | 26.05 |
| 1388 | 193.79 | 55.61 | 41.08 | 30.29 | 26.1  |
| 1390 | 194.23 | 55.66 | 41.12 | 30.33 | 26.14 |
| 1392 | 194.6  | 55.69 | 41.15 | 30.34 | 26.13 |
| 1394 | 194.98 | 55.72 | 41.18 | 30.35 | 26.13 |
| 1396 | 195.36 | 55.77 | 41.22 | 30.38 | 26.15 |
| 1398 | 195.72 | 55.8  | 41.25 | 30.39 | 26.15 |
| 1400 | 196.13 | 55.81 | 41.27 | 30.39 | 26.14 |
| 1402 | 196.52 | 55.87 | 41.33 | 30.43 | 26.18 |
| 1404 | 196.89 | 55.9  | 41.37 | 30.46 | 26.2  |
| 1406 | 197.3  | 55.94 | 41.4  | 30.49 | 26.2  |
| 1408 | 197.67 | 55.99 | 41.44 | 30.5  | 26.21 |
| 1410 | 198.05 | 56.03 | 41.47 | 30.52 | 26.22 |
| 1412 | 198.44 | 56.08 | 41.51 | 30.55 | 26.24 |
| 1414 | 198.85 | 56.08 | 41.52 | 30.55 | 26.24 |
| 1416 | 199.25 | 56.14 | 41.58 | 30.59 | 26.26 |
| 1418 | 199.61 | 56.17 | 41.6  | 30.61 | 26.26 |
| 1420 | 200.01 | 56.21 | 41.64 | 30.63 | 26.28 |
| 1422 | 200.43 | 56.25 | 41.68 | 30.65 | 26.3  |
| 1424 | 200.81 | 56.32 | 41.75 | 30.69 | 26.32 |
| 1426 | 201.21 | 56.36 | 41.79 | 30.73 | 26.35 |
| 1428 | 201.58 | 56.39 | 41.84 | 30.78 | 26.38 |

|      |        |       |       |       |       |
|------|--------|-------|-------|-------|-------|
| 1430 | 202.03 | 56.43 | 41.86 | 30.79 | 26.38 |
| 1432 | 202.39 | 56.44 | 41.86 | 30.78 | 26.35 |
| 1434 | 202.77 | 56.47 | 41.9  | 30.79 | 26.36 |
| 1436 | 203.19 | 56.55 | 41.97 | 30.85 | 26.39 |
| 1438 | 203.63 | 56.59 | 42.01 | 30.89 | 26.43 |
| 1440 | 203.99 | 56.62 | 42.04 | 30.9  | 26.44 |
| 1442 | 204.38 | 56.67 | 42.08 | 30.93 | 26.46 |
| 1444 | 204.75 | 56.7  | 42.12 | 30.94 | 26.47 |
| 1446 | 205.13 | 56.7  | 42.11 | 30.92 | 26.44 |
| 1448 | 205.57 | 56.78 | 42.19 | 30.98 | 26.49 |
| 1450 | 205.97 | 56.84 | 42.24 | 31.02 | 26.52 |
| 1452 | 206.34 | 56.84 | 42.24 | 31.01 | 26.49 |
| 1454 | 206.72 | 56.86 | 42.27 | 31.02 | 26.5  |
| 1456 | 207.18 | 56.93 | 42.33 | 31.07 | 26.53 |
| 1458 | 207.57 | 56.99 | 42.38 | 31.12 | 26.56 |
| 1460 | 207.92 | 57.02 | 42.4  | 31.13 | 26.57 |
| 1462 | 208.36 | 57.04 | 42.43 | 31.15 | 26.57 |
| 1464 | 208.7  | 57.06 | 42.45 | 31.14 | 26.57 |
| 1466 | 209.08 | 57.08 | 42.47 | 31.16 | 26.56 |
| 1468 | 209.48 | 57.13 | 42.52 | 31.2  | 26.6  |
| 1470 | 209.97 | 57.19 | 42.58 | 31.24 | 26.62 |
| 1472 | 210.36 | 57.22 | 42.61 | 31.24 | 26.62 |
| 1474 | 210.74 | 57.25 | 42.65 | 31.27 | 26.64 |
| 1476 | 211.12 | 57.29 | 42.66 | 31.28 | 26.64 |
| 1478 | 211.57 | 57.34 | 42.72 | 31.31 | 26.67 |
| 1480 | 211.94 | 57.36 | 42.75 | 31.33 | 26.7  |
| 1482 | 212.33 | 57.39 | 42.78 | 31.35 | 26.69 |
| 1484 | 212.68 | 57.39 | 42.79 | 31.35 | 26.69 |
| 1486 | 213.16 | 57.47 | 42.85 | 31.4  | 26.73 |
| 1488 | 213.58 | 57.5  | 42.88 | 31.42 | 26.73 |
| 1490 | 213.91 | 57.47 | 42.86 | 31.38 | 26.69 |
| 1492 | 214.3  | 57.52 | 42.91 | 31.42 | 26.69 |
| 1494 | 214.79 | 57.6  | 42.97 | 31.49 | 26.75 |
| 1496 | 215.17 | 57.65 | 43.02 | 31.52 | 26.77 |
| 1498 | 215.54 | 57.66 | 43.04 | 31.53 | 26.75 |
| 1500 | 215.94 | 57.71 | 43.08 | 31.55 | 26.79 |
| 1502 | 216.43 | 57.77 | 43.14 | 31.58 | 26.81 |
| 1504 | 216.82 | 57.79 | 43.18 | 31.6  | 26.8  |
| 1506 | 217.2  | 57.82 | 43.19 | 31.61 | 26.81 |
| 1508 | 217.56 | 57.82 | 43.2  | 31.62 | 26.8  |
| 1510 | 218.07 | 57.91 | 43.28 | 31.68 | 26.87 |
| 1512 | 218.44 | 57.93 | 43.32 | 31.69 | 26.88 |
| 1514 | 218.81 | 57.96 | 43.35 | 31.71 | 26.88 |
| 1516 | 219.2  | 58    | 43.38 | 31.74 | 26.9  |

|      |        |       |       |       |       |
|------|--------|-------|-------|-------|-------|
| 1518 | 219.68 | 58.03 | 43.42 | 31.76 | 26.91 |
| 1520 | 220.08 | 58.08 | 43.46 | 31.77 | 26.93 |
| 1522 | 220.5  | 58.13 | 43.51 | 31.82 | 26.95 |
| 1524 | 220.91 | 58.19 | 43.57 | 31.86 | 26.99 |
| 1526 | 221.38 | 58.24 | 43.62 | 31.9  | 27.02 |
| 1528 | 221.77 | 58.27 | 43.66 | 31.94 | 27.02 |
| 1530 | 222.13 | 58.29 | 43.66 | 31.94 | 27    |
| 1532 | 222.5  | 58.3  | 43.68 | 31.94 | 27.01 |
| 1534 | 222.98 | 58.35 | 43.72 | 31.97 | 27.04 |
| 1536 | 223.35 | 58.36 | 43.73 | 31.96 | 27.02 |
| 1538 | 223.75 | 58.39 | 43.77 | 31.99 | 27.02 |
| 1540 | 224.2  | 58.47 | 43.84 | 32.06 | 27.08 |
| 1542 | 224.65 | 58.48 | 43.85 | 32.05 | 27.08 |
| 1544 | 225.05 | 58.5  | 43.9  | 32.06 | 27.09 |
| 1546 | 225.46 | 58.57 | 43.94 | 32.11 | 27.12 |
| 1548 | 225.85 | 58.6  | 43.99 | 32.14 | 27.14 |
| 1550 | 226.24 | 58.65 | 44.02 | 32.16 | 27.14 |
| 1552 | 226.7  | 58.68 | 44.06 | 32.18 | 27.16 |
| 1554 | 227.14 | 58.74 | 44.1  | 32.22 | 27.18 |
| 1556 | 227.53 | 58.74 | 44.12 | 32.23 | 27.19 |
| 1558 | 227.99 | 58.79 | 44.15 | 32.25 | 27.2  |
| 1560 | 228.39 | 58.82 | 44.19 | 32.29 | 27.2  |
| 1562 | 228.82 | 58.89 | 44.26 | 32.34 | 27.26 |
| 1564 | 229.19 | 58.9  | 44.27 | 32.35 | 27.25 |
| 1566 | 229.69 | 58.98 | 44.34 | 32.4  | 27.29 |
| 1568 | 230.08 | 58.99 | 44.36 | 32.38 | 27.28 |
| 1570 | 230.47 | 59    | 44.37 | 32.4  | 27.27 |
| 1572 | 230.89 | 59.04 | 44.4  | 32.43 | 27.3  |
| 1574 | 231.36 | 59.06 | 44.43 | 32.44 | 27.29 |
| 1576 | 231.78 | 59.1  | 44.47 | 32.45 | 27.29 |
| 1578 | 232.21 | 59.16 | 44.54 | 32.52 | 27.33 |
| 1580 | 232.56 | 59.16 | 44.53 | 32.5  | 27.32 |
| 1582 | 233.01 | 59.19 | 44.55 | 32.51 | 27.33 |
| 1584 | 233.45 | 59.26 | 44.63 | 32.58 | 27.39 |
| 1586 | 233.82 | 59.25 | 44.62 | 32.55 | 27.35 |
| 1588 | 234.24 | 59.28 | 44.65 | 32.59 | 27.37 |
| 1590 | 234.69 | 59.29 | 44.67 | 32.58 | 27.36 |
| 1592 | 235.13 | 59.33 | 44.7  | 32.61 | 27.37 |
| 1594 | 235.52 | 59.34 | 44.73 | 32.61 | 27.37 |
| 1596 | 235.95 | 59.4  | 44.78 | 32.65 | 27.4  |
| 1598 | 236.42 | 59.43 | 44.81 | 32.67 | 27.42 |
| 1600 | 236.82 | 59.48 | 44.86 | 32.71 | 27.44 |
| 1602 | 237.27 | 59.56 | 44.94 | 32.78 | 27.49 |
| 1604 | 237.73 | 59.55 | 44.92 | 32.75 | 27.45 |

|      |        |       |       |       |       |
|------|--------|-------|-------|-------|-------|
| 1606 | 238.19 | 59.63 | 44.97 | 32.8  | 27.49 |
| 1608 | 238.59 | 59.64 | 44.99 | 32.82 | 27.51 |
| 1610 | 239.04 | 59.7  | 45.07 | 32.86 | 27.54 |
| 1612 | 239.42 | 59.7  | 45.06 | 32.86 | 27.52 |
| 1614 | 239.86 | 59.72 | 45.09 | 32.86 | 27.51 |
| 1616 | 240.27 | 59.75 | 45.11 | 32.87 | 27.51 |
| 1618 | 240.67 | 59.78 | 45.14 | 32.9  | 27.52 |
| 1620 | 241.13 | 59.86 | 45.22 | 32.96 | 27.58 |
| 1622 | 241.64 | 59.9  | 45.26 | 32.98 | 27.6  |
| 1624 | 242.03 | 59.89 | 45.25 | 32.95 | 27.57 |
| 1626 | 242.47 | 59.94 | 45.3  | 33.01 | 27.61 |
| 1628 | 242.87 | 59.96 | 45.33 | 33.01 | 27.61 |
| 1630 | 243.38 | 60.02 | 45.37 | 33.04 | 27.62 |
| 1632 | 243.8  | 60.05 | 45.41 | 33.07 | 27.64 |
| 1634 | 244.21 | 60.09 | 45.46 | 33.1  | 27.66 |
| 1636 | 244.68 | 60.12 | 45.48 | 33.13 | 27.66 |
| 1638 | 245.07 | 60.14 | 45.5  | 33.14 | 27.66 |
| 1640 | 245.52 | 60.19 | 45.54 | 33.17 | 27.69 |
| 1642 | 245.95 | 60.23 | 45.58 | 33.19 | 27.7  |
| 1644 | 246.38 | 60.26 | 45.61 | 33.23 | 27.71 |
| 1646 | 246.79 | 60.28 | 45.63 | 33.24 | 27.71 |
| 1648 | 247.27 | 60.33 | 45.67 | 33.27 | 27.73 |
| 1650 | 247.68 | 60.37 | 45.7  | 33.29 | 27.74 |
| 1652 | 248.1  | 60.39 | 45.73 | 33.31 | 27.75 |
| 1654 | 248.54 | 60.44 | 45.77 | 33.34 | 27.78 |
| 1656 | 249.03 | 60.46 | 45.79 | 33.35 | 27.76 |
| 1658 | 249.46 | 60.5  | 45.83 | 33.36 | 27.78 |
| 1660 | 249.9  | 60.55 | 45.88 | 33.4  | 27.81 |
| 1662 | 250.33 | 60.53 | 45.87 | 33.36 | 27.77 |
| 1664 | 250.75 | 60.55 | 45.88 | 33.38 | 27.77 |
| 1666 | 251.16 | 60.57 | 45.91 | 33.4  | 27.78 |
| 1668 | 251.6  | 60.64 | 45.98 | 33.45 | 27.83 |
| 1670 | 252.1  | 60.69 | 46.01 | 33.49 | 27.83 |
| 1672 | 252.53 | 60.7  | 46.03 | 33.49 | 27.83 |
| 1674 | 252.98 | 60.74 | 46.07 | 33.53 | 27.85 |
| 1676 | 253.44 | 60.78 | 46.1  | 33.56 | 27.87 |
| 1678 | 253.93 | 60.79 | 46.1  | 33.53 | 27.85 |
| 1680 | 254.38 | 60.84 | 46.16 | 33.59 | 27.88 |
| 1682 | 254.79 | 60.87 | 46.17 | 33.61 | 27.88 |
| 1684 | 255.18 | 60.89 | 46.21 | 33.63 | 27.89 |
| 1686 | 255.69 | 60.95 | 46.25 | 33.67 | 27.91 |
| 1688 | 256.12 | 60.97 | 46.28 | 33.67 | 27.9  |
| 1690 | 256.58 | 61.02 | 46.33 | 33.7  | 27.94 |
| 1692 | 257.01 | 61.04 | 46.35 | 33.71 | 27.95 |



|      |        |       |       |       |       |
|------|--------|-------|-------|-------|-------|
| 1694 | 257.5  | 61.04 | 46.34 | 33.7  | 27.93 |
| 1696 | 257.96 | 61.1  | 46.41 | 33.75 | 27.96 |
| 1698 | 258.4  | 61.12 | 46.44 | 33.74 | 27.95 |
| 1700 | 258.86 | 61.18 | 46.49 | 33.8  | 28    |
| 1702 | 259.39 | 61.26 | 46.55 | 33.86 | 28.06 |
| 1704 | 259.77 | 61.25 | 46.55 | 33.84 | 28.03 |
| 1706 | 260.21 | 61.3  | 46.58 | 33.87 | 28.03 |
| 1708 | 260.64 | 61.31 | 46.6  | 33.87 | 28.01 |
| 1710 | 261.17 | 61.36 | 46.65 | 33.93 | 28.05 |
| 1712 | 261.6  | 61.38 | 46.66 | 33.93 | 28.05 |
| 1714 | 262.06 | 61.42 | 46.7  | 33.95 | 28.06 |
| 1716 | 262.47 | 61.44 | 46.72 | 33.97 | 28.07 |
| 1718 | 262.96 | 61.48 | 46.75 | 33.99 | 28.07 |
| 1720 | 263.38 | 61.52 | 46.78 | 34.01 | 28.08 |
| 1722 | 263.85 | 61.57 | 46.83 | 34.05 | 28.13 |
| 1724 | 264.38 | 61.62 | 46.88 | 34.07 | 28.15 |
| 1726 | 264.84 | 61.68 | 46.92 | 34.12 | 28.17 |
| 1728 | 265.29 | 61.69 | 46.95 | 34.12 | 28.18 |
| 1730 | 265.75 | 61.74 | 46.98 | 34.16 | 28.2  |
| 1732 | 266.26 | 61.76 | 47    | 34.16 | 28.19 |
| 1734 | 266.6  | 61.78 | 47.02 | 34.16 | 28.2  |
| 1736 | 267.08 | 61.78 | 47.04 | 34.17 | 28.19 |
| 1738 | 267.49 | 61.81 | 47.06 | 34.18 | 28.18 |
| 1740 | 267.93 | 61.85 | 47.08 | 34.2  | 28.19 |
| 1742 | 268.48 | 61.9  | 47.12 | 34.24 | 28.21 |
| 1744 | 268.97 | 61.96 | 47.18 | 34.29 | 28.26 |
| 1746 | 269.41 | 61.97 | 47.19 | 34.28 | 28.24 |
| 1748 | 269.86 | 62.02 | 47.22 | 34.31 | 28.25 |
| 1750 | 270.38 | 62.08 | 47.26 | 34.36 | 28.28 |
| 1752 | 270.79 | 62.08 | 47.29 | 34.37 | 28.28 |
| 1754 | 271.22 | 62.1  | 47.3  | 34.38 | 28.27 |
| 1756 | 271.68 | 62.15 | 47.35 | 34.4  | 28.29 |
| 1758 | 272.18 | 62.17 | 47.37 | 34.4  | 28.31 |
| 1760 | 272.66 | 62.22 | 47.41 | 34.43 | 28.32 |
| 1762 | 273.15 | 62.27 | 47.46 | 34.47 | 28.36 |
| 1764 | 273.59 | 62.27 | 47.46 | 34.46 | 28.34 |
| 1766 | 274.13 | 62.34 | 47.51 | 34.51 | 28.37 |
| 1768 | 274.58 | 62.37 | 47.55 | 34.54 | 28.39 |
| 1770 | 274.99 | 62.37 | 47.55 | 34.53 | 28.37 |
| 1772 | 275.5  | 62.41 | 47.57 | 34.55 | 28.38 |
| 1774 | 275.94 | 62.46 | 47.62 | 34.59 | 28.4  |
| 1776 | 276.41 | 62.49 | 47.65 | 34.62 | 28.4  |
| 1778 | 276.89 | 62.55 | 47.7  | 34.65 | 28.44 |
| 1780 | 277.36 | 62.58 | 47.73 | 34.66 | 28.46 |

|      |        |       |       |       |       |
|------|--------|-------|-------|-------|-------|
| 1782 | 277.88 | 62.6  | 47.74 | 34.68 | 28.44 |
| 1784 | 278.34 | 62.65 | 47.78 | 34.71 | 28.46 |
| 1786 | 278.76 | 62.68 | 47.8  | 34.73 | 28.47 |
| 1788 | 279.21 | 62.71 | 47.82 | 34.73 | 28.47 |
| 1790 | 279.74 | 62.76 | 47.87 | 34.77 | 28.5  |
| 1792 | 280.2  | 62.79 | 47.9  | 34.77 | 28.5  |
| 1794 | 280.67 | 62.83 | 47.94 | 34.81 | 28.52 |
| 1796 | 281.13 | 62.85 | 47.96 | 34.83 | 28.53 |
| 1798 | 281.67 | 62.9  | 47.99 | 34.85 | 28.55 |
| 1800 | 282.13 | 62.94 | 48.04 | 34.9  | 28.58 |
| 1802 | 282.57 | 62.97 | 48.05 | 34.9  | 28.58 |
| 1804 | 283.04 | 63.03 | 48.1  | 34.95 | 28.61 |
| 1806 | 283.49 | 63.07 | 48.15 | 34.97 | 28.63 |
| 1808 | 284    | 63.09 | 48.15 | 34.96 | 28.62 |
| 1810 | 284.45 | 63.11 | 48.17 | 34.97 | 28.61 |
| 1812 | 284.95 | 63.16 | 48.22 | 35.01 | 28.65 |
| 1814 | 285.46 | 63.18 | 48.23 | 35.01 | 28.63 |
| 1816 | 285.94 | 63.25 | 48.3  | 35.05 | 28.66 |
| 1818 | 286.38 | 63.28 | 48.32 | 35.07 | 28.67 |
| 1820 | 286.85 | 63.32 | 48.36 | 35.11 | 28.7  |
| 1822 | 287.37 | 63.37 | 48.4  | 35.13 | 28.72 |
| 1824 | 287.78 | 63.37 | 48.38 | 35.1  | 28.69 |
| 1826 | 288.28 | 63.45 | 48.46 | 35.17 | 28.75 |
| 1828 | 288.74 | 63.48 | 48.49 | 35.19 | 28.75 |
| 1830 | 289.25 | 63.49 | 48.49 | 35.17 | 28.72 |
| 1832 | 289.7  | 63.52 | 48.5  | 35.17 | 28.72 |
| 1834 | 290.15 | 63.57 | 48.56 | 35.22 | 28.74 |
| 1836 | 290.6  | 63.61 | 48.57 | 35.24 | 28.74 |
| 1838 | 291.12 | 63.64 | 48.6  | 35.27 | 28.75 |
| 1840 | 291.6  | 63.7  | 48.66 | 35.3  | 28.8  |
| 1842 | 292.05 | 63.72 | 48.66 | 35.31 | 28.79 |
| 1844 | 292.58 | 63.77 | 48.7  | 35.33 | 28.8  |
| 1846 | 293.05 | 63.8  | 48.75 | 35.38 | 28.84 |
| 1848 | 293.54 | 63.86 | 48.79 | 35.39 | 28.85 |
| 1850 | 293.95 | 63.85 | 48.77 | 35.37 | 28.81 |
| 1852 | 294.39 | 63.87 | 48.8  | 35.38 | 28.82 |
| 1854 | 294.93 | 63.93 | 48.84 | 35.41 | 28.85 |
| 1856 | 295.4  | 63.99 | 48.9  | 35.46 | 28.87 |
| 1858 | 295.88 | 64.06 | 48.95 | 35.51 | 28.92 |
| 1860 | 296.35 | 64.09 | 48.98 | 35.53 | 28.92 |
| 1862 | 296.88 | 64.12 | 49.01 | 35.54 | 28.94 |
| 1864 | 297.33 | 64.17 | 49.05 | 35.56 | 28.95 |
| 1866 | 297.76 | 64.2  | 49.07 | 35.58 | 28.94 |
| 1868 | 298.18 | 64.22 | 49.08 | 35.59 | 28.94 |

|      |        |       |       |       |       |
|------|--------|-------|-------|-------|-------|
| 1870 | 298.74 | 64.29 | 49.13 | 35.63 | 28.97 |
| 1872 | 299.21 | 64.32 | 49.17 | 35.66 | 28.98 |
| 1874 | 299.67 | 64.36 | 49.2  | 35.68 | 29    |
| 1876 | 300.13 | 64.39 | 49.23 | 35.71 | 29    |
| 1878 | 300.63 | 64.39 | 49.21 | 35.69 | 28.97 |
| 1880 | 301.08 | 64.44 | 49.26 | 35.73 | 28.98 |
| 1882 | 301.56 | 64.51 | 49.31 | 35.78 | 29.04 |
| 1884 | 302.01 | 64.54 | 49.34 | 35.79 | 29.04 |
| 1886 | 302.55 | 64.57 | 49.38 | 35.81 | 29.05 |
| 1888 | 302.99 | 64.58 | 49.39 | 35.8  | 29.04 |
| 1890 | 303.46 | 64.63 | 49.42 | 35.83 | 29.06 |
| 1892 | 303.96 | 64.68 | 49.47 | 35.87 | 29.09 |
| 1894 | 304.4  | 64.7  | 49.48 | 35.88 | 29.08 |
| 1896 | 304.93 | 64.76 | 49.53 | 35.92 | 29.11 |
| 1898 | 305.37 | 64.79 | 49.56 | 35.94 | 29.13 |
| 1900 | 305.85 | 64.85 | 49.61 | 35.98 | 29.16 |
| 1902 | 306.38 | 64.87 | 49.63 | 35.99 | 29.17 |
| 1904 | 306.83 | 64.91 | 49.67 | 36.03 | 29.19 |
| 1906 | 307.29 | 64.93 | 49.68 | 36.02 | 29.17 |
| 1908 | 307.76 | 64.96 | 49.71 | 36.04 | 29.18 |
| 1910 | 308.3  | 65.02 | 49.74 | 36.06 | 29.2  |
| 1912 | 308.7  | 65.04 | 49.76 | 36.07 | 29.18 |
| 1914 | 309.16 | 65.08 | 49.8  | 36.1  | 29.21 |
| 1916 | 309.61 | 65.12 | 49.83 | 36.12 | 29.23 |
| 1918 | 310.15 | 65.15 | 49.86 | 36.14 | 29.24 |
| 1920 | 310.62 | 65.19 | 49.89 | 36.16 | 29.25 |
| 1922 | 311.08 | 65.22 | 49.91 | 36.17 | 29.25 |
| 1924 | 311.54 | 65.25 | 49.94 | 36.19 | 29.27 |
| 1926 | 312.01 | 65.3  | 49.98 | 36.21 | 29.29 |
| 1928 | 312.53 | 65.33 | 50.01 | 36.23 | 29.3  |
| 1930 | 312.98 | 65.37 | 50.04 | 36.25 | 29.3  |
| 1932 | 313.44 | 65.43 | 50.08 | 36.29 | 29.33 |
| 1934 | 313.88 | 65.46 | 50.09 | 36.3  | 29.34 |
| 1936 | 314.46 | 65.51 | 50.12 | 36.33 | 29.36 |
| 1938 | 314.93 | 65.53 | 50.15 | 36.35 | 29.36 |
| 1940 | 315.39 | 65.54 | 50.16 | 36.35 | 29.36 |
| 1942 | 315.94 | 65.6  | 50.21 | 36.4  | 29.37 |
| 1944 | 316.42 | 65.69 | 50.28 | 36.44 | 29.39 |
| 1946 | 316.83 | 65.71 | 50.28 | 36.46 | 29.4  |
| 1948 | 317.34 | 65.74 | 50.29 | 36.47 | 29.4  |
| 1950 | 317.78 | 65.75 | 50.31 | 36.46 | 29.38 |
| 1952 | 318.23 | 65.77 | 50.32 | 36.47 | 29.37 |
| 1954 | 318.75 | 65.84 | 50.39 | 36.52 | 29.43 |
| 1956 | 319.22 | 65.87 | 50.42 | 36.54 | 29.45 |

|      |        |       |       |       |       |
|------|--------|-------|-------|-------|-------|
| 1958 | 319.77 | 65.92 | 50.45 | 36.56 | 29.47 |
| 1960 | 320.23 | 65.96 | 50.48 | 36.57 | 29.47 |
| 1962 | 320.69 | 66    | 50.51 | 36.6  | 29.48 |
| 1964 | 321.12 | 66.01 | 50.52 | 36.59 | 29.46 |
| 1966 | 321.58 | 66.07 | 50.57 | 36.63 | 29.5  |
| 1968 | 322.1  | 66.13 | 50.61 | 36.67 | 29.52 |
| 1970 | 322.58 | 66.18 | 50.65 | 36.7  | 29.54 |
| 1972 | 323.07 | 66.22 | 50.68 | 36.73 | 29.55 |
| 1974 | 323.65 | 66.25 | 50.71 | 36.76 | 29.56 |
| 1976 | 324.11 | 66.31 | 50.74 | 36.78 | 29.57 |
| 1978 | 324.56 | 66.35 | 50.77 | 36.8  | 29.58 |
| 1980 | 325    | 66.41 | 50.81 | 36.83 | 29.61 |
| 1982 | 325.48 | 66.43 | 50.81 | 36.83 | 29.61 |
| 1984 | 325.98 | 66.52 | 50.88 | 36.88 | 29.64 |
| 1986 | 326.47 | 66.55 | 50.92 | 36.91 | 29.67 |
| 1988 | 326.94 | 66.57 | 50.94 | 36.91 | 29.64 |
| 1990 | 327.49 | 66.61 | 50.94 | 36.92 | 29.65 |
| 1992 | 327.97 | 66.66 | 50.99 | 36.95 | 29.67 |
| 1994 | 328.45 | 66.71 | 51.04 | 37    | 29.7  |
| 1996 | 328.93 | 66.78 | 51.08 | 37.05 | 29.73 |
| 1998 | 329.41 | 66.83 | 51.11 | 37.07 | 29.74 |
| 2000 | 329.81 | 66.84 | 51.11 | 37.05 | 29.71 |
| 2002 | 330.31 | 66.91 | 51.16 | 37.09 | 29.76 |
| 2004 | 330.8  | 66.96 | 51.21 | 37.13 | 29.77 |
| 2006 | 331.37 | 67    | 51.24 | 37.15 | 29.78 |
| 2008 | 331.86 | 67.05 | 51.26 | 37.17 | 29.79 |
| 2010 | 332.33 | 67.1  | 51.29 | 37.19 | 29.81 |
| 2012 | 332.79 | 67.14 | 51.33 | 37.21 | 29.82 |
| 2014 | 333.3  | 67.2  | 51.34 | 37.23 | 29.82 |
| 2016 | 333.71 | 67.23 | 51.37 | 37.24 | 29.81 |
| 2018 | 334.17 | 67.29 | 51.41 | 37.28 | 29.85 |
| 2020 | 334.64 | 67.33 | 51.44 | 37.3  | 29.86 |
| 2022 | 335.2  | 67.37 | 51.47 | 37.32 | 29.87 |
| 2024 | 335.69 | 67.43 | 51.5  | 37.34 | 29.88 |
| 2026 | 336.16 | 67.47 | 51.54 | 37.36 | 29.88 |
| 2028 | 336.6  | 67.51 | 51.56 | 37.37 | 29.88 |
| 2030 | 337.14 | 67.55 | 51.58 | 37.38 | 29.89 |
| 2032 | 337.59 | 67.62 | 51.62 | 37.42 | 29.93 |
| 2034 | 338.02 | 67.66 | 51.65 | 37.44 | 29.92 |
| 2036 | 338.46 | 67.71 | 51.69 | 37.48 | 29.94 |
| 2038 | 339    | 67.77 | 51.72 | 37.5  | 29.95 |
| 2040 | 339.5  | 67.82 | 51.75 | 37.51 | 29.96 |
| 2042 | 340    | 67.87 | 51.77 | 37.52 | 29.97 |
| 2044 | 340.45 | 67.89 | 51.78 | 37.52 | 29.95 |

|      |        |       |       |       |       |
|------|--------|-------|-------|-------|-------|
| 2046 | 340.99 | 67.96 | 51.83 | 37.57 | 29.98 |
| 2048 | 341.46 | 68.03 | 51.86 | 37.6  | 30.01 |
| 2050 | 341.89 | 68.09 | 51.9  | 37.62 | 30.02 |
| 2052 | 342.32 | 68.12 | 51.91 | 37.62 | 30.02 |
| 2054 | 342.77 | 68.18 | 51.96 | 37.65 | 30.05 |
| 2056 | 343.34 | 68.24 | 52    | 37.69 | 30.06 |
| 2058 | 343.81 | 68.28 | 52.03 | 37.71 | 30.07 |
| 2060 | 344.3  | 68.34 | 52.07 | 37.74 | 30.09 |
| 2062 | 344.86 | 68.41 | 52.11 | 37.77 | 30.11 |
| 2064 | 345.29 | 68.43 | 52.12 | 37.76 | 30.1  |
| 2066 | 345.75 | 68.5  | 52.18 | 37.81 | 30.14 |
| 2068 | 346.25 | 68.53 | 52.19 | 37.81 | 30.13 |
| 2070 | 346.69 | 68.59 | 52.22 | 37.82 | 30.14 |
| 2072 | 347.15 | 68.66 | 52.25 | 37.85 | 30.15 |
| 2074 | 347.63 | 68.71 | 52.28 | 37.88 | 30.16 |
| 2076 | 348.12 | 68.76 | 52.31 | 37.9  | 30.17 |
| 2078 | 348.7  | 68.85 | 52.36 | 37.95 | 30.21 |
| 2080 | 349.14 | 68.87 | 52.37 | 37.93 | 30.2  |
| 2082 | 349.61 | 68.94 | 52.42 | 37.96 | 30.21 |
| 2084 | 350.06 | 69.03 | 52.46 | 38    | 30.24 |
| 2086 | 350.58 | 69.11 | 52.51 | 38.06 | 30.26 |
| 2088 | 351    | 69.15 | 52.54 | 38.07 | 30.26 |
| 2090 | 351.48 | 69.21 | 52.57 | 38.09 | 30.26 |
| 2092 | 351.97 | 69.29 | 52.61 | 38.12 | 30.3  |
| 2094 | 352.55 | 69.39 | 52.66 | 38.17 | 30.33 |
| 2096 | 353.02 | 69.43 | 52.69 | 38.18 | 30.34 |
| 2098 | 353.46 | 69.48 | 52.72 | 38.2  | 30.33 |
| 2100 | 353.9  | 69.54 | 52.74 | 38.21 | 30.33 |
| 2102 | 354.33 | 69.61 | 52.79 | 38.24 | 30.37 |
| 2104 | 354.83 | 69.69 | 52.81 | 38.25 | 30.37 |
| 2106 | 355.3  | 69.77 | 52.87 | 38.3  | 30.41 |
| 2108 | 355.76 | 69.83 | 52.88 | 38.3  | 30.39 |
| 2110 | 356.34 | 69.9  | 52.92 | 38.34 | 30.42 |
| 2112 | 356.81 | 69.98 | 52.96 | 38.36 | 30.43 |
| 2114 | 357.3  | 70.05 | 52.99 | 38.38 | 30.44 |
| 2116 | 357.78 | 70.15 | 53.04 | 38.43 | 30.47 |
| 2118 | 358.25 | 70.21 | 53.05 | 38.44 | 30.46 |
| 2120 | 358.68 | 70.28 | 53.09 | 38.47 | 30.48 |
| 2122 | 359.09 | 70.33 | 53.1  | 38.46 | 30.47 |
| 2124 | 359.57 | 70.42 | 53.15 | 38.5  | 30.5  |
| 2126 | 360.13 | 70.53 | 53.2  | 38.54 | 30.52 |
| 2128 | 360.62 | 70.61 | 53.25 | 38.59 | 30.57 |
| 2130 | 361.07 | 70.69 | 53.27 | 38.59 | 30.55 |
| 2132 | 361.52 | 70.77 | 53.3  | 38.6  | 30.56 |

|      |        |       |       |       |       |
|------|--------|-------|-------|-------|-------|
| 2134 | 362.04 | 70.84 | 53.33 | 38.61 | 30.58 |
| 2136 | 362.45 | 70.96 | 53.36 | 38.65 | 30.59 |
| 2138 | 362.86 | 71.04 | 53.39 | 38.65 | 30.58 |
| 2140 | 363.31 | 71.14 | 53.42 | 38.68 | 30.6  |
| 2142 | 363.85 | 71.27 | 53.45 | 38.69 | 30.62 |
| 2144 | 364.32 | 71.38 | 53.48 | 38.71 | 30.62 |
| 2146 | 364.76 | 71.48 | 53.49 | 38.73 | 30.6  |
| 2148 | 365.2  | 71.61 | 53.53 | 38.77 | 30.64 |
| 2150 | 365.71 | 71.75 | 53.57 | 38.79 | 30.66 |
| 2152 | 366.12 | 71.86 | 53.59 | 38.81 | 30.65 |
| 2154 | 366.56 | 71.98 | 53.62 | 38.82 | 30.67 |
| 2156 | 367.02 | 72.12 | 53.66 | 38.86 | 30.7  |
| 2158 | 367.54 | 72.26 | 53.69 | 38.87 | 30.69 |
| 2160 | 368.01 | 72.4  | 53.72 | 38.89 | 30.73 |
| 2162 | 368.46 | 72.53 | 53.76 | 38.92 | 30.74 |
| 2164 | 368.9  | 72.67 | 53.8  | 38.93 | 30.74 |
| 2166 | 369.4  | 72.81 | 53.83 | 38.96 | 30.75 |
| 2168 | 369.81 | 72.97 | 53.86 | 38.98 | 30.77 |
| 2170 | 370.26 | 73.15 | 53.91 | 39.02 | 30.81 |
| 2172 | 370.7  | 73.29 | 53.93 | 39.04 | 30.8  |
| 2174 | 371.23 | 73.48 | 53.97 | 39.07 | 30.82 |
| 2176 | 371.66 | 73.63 | 53.99 | 39.08 | 30.82 |
| 2178 | 372.08 | 73.8  | 54.01 | 39.11 | 30.83 |
| 2180 | 372.49 | 73.96 | 54.03 | 39.12 | 30.82 |
| 2182 | 372.98 | 74.15 | 54.08 | 39.17 | 30.86 |
| 2184 | 373.44 | 74.34 | 54.14 | 39.21 | 30.89 |
| 2186 | 373.91 | 74.52 | 54.18 | 39.25 | 30.92 |
| 2188 | 374.34 | 74.66 | 54.17 | 39.24 | 30.92 |
| 2190 | 374.9  | 74.89 | 54.24 | 39.29 | 30.94 |
| 2192 | 375.35 | 75.05 | 54.24 | 39.3  | 30.96 |
| 2194 | 375.76 | 75.21 | 54.25 | 39.29 | 30.94 |
| 2196 | 376.22 | 75.44 | 54.33 | 39.36 | 31    |
| 2198 | 376.71 | 75.64 | 54.37 | 39.39 | 31.02 |
| 2200 | 377.12 | 75.85 | 54.4  | 39.41 | 31.03 |
| 2202 | 377.53 | 76.03 | 54.39 | 39.42 | 31.03 |
| 2204 | 377.97 | 76.21 | 54.42 | 39.43 | 31.03 |
| 2206 | 378.52 | 76.43 | 54.43 | 39.43 | 31.03 |
| 2208 | 379    | 76.66 | 54.49 | 39.47 | 31.06 |
| 2210 | 379.45 | 76.87 | 54.53 | 39.52 | 31.09 |
| 2212 | 379.88 | 77.08 | 54.57 | 39.54 | 31.11 |
| 2214 | 380.29 | 77.27 | 54.59 | 39.56 | 31.13 |
| 2216 | 380.74 | 77.49 | 54.6  | 39.57 | 31.13 |
| 2218 | 381.16 | 77.72 | 54.65 | 39.61 | 31.15 |
| 2220 | 381.62 | 77.97 | 54.69 | 39.66 | 31.18 |

|      |        |       |       |       |       |
|------|--------|-------|-------|-------|-------|
| 2222 | 382.14 | 78.17 | 54.7  | 39.66 | 31.17 |
| 2224 | 382.61 | 78.42 | 54.71 | 39.68 | 31.18 |
| 2226 | 383.08 | 78.68 | 54.77 | 39.72 | 31.21 |
| 2228 | 383.49 | 78.89 | 54.77 | 39.72 | 31.22 |
| 2230 | 384.01 | 79.12 | 54.82 | 39.77 | 31.25 |
| 2232 | 384.41 | 79.38 | 54.87 | 39.79 | 31.26 |
| 2234 | 384.8  | 79.61 | 54.88 | 39.83 | 31.29 |
| 2236 | 385.21 | 79.85 | 54.9  | 39.85 | 31.29 |
| 2238 | 385.73 | 80.12 | 54.92 | 39.86 | 31.28 |
| 2240 | 386.2  | 80.36 | 54.93 | 39.88 | 31.28 |
| 2242 | 386.71 | 80.63 | 54.99 | 39.93 | 31.32 |
| 2244 | 387.13 | 80.87 | 55    | 39.94 | 31.34 |
| 2246 | 387.64 | 81.11 | 55.01 | 39.95 | 31.33 |
| 2248 | 388.07 | 81.43 | 55.08 | 40.02 | 31.38 |
| 2250 | 388.46 | 81.69 | 55.1  | 40.03 | 31.37 |
| 2252 | 388.82 | 81.92 | 55.11 | 40.03 | 31.36 |
| 2254 | 389.31 | 82.15 | 55.12 | 40.03 | 31.36 |
| 2256 | 389.79 | 82.46 | 55.16 | 40.07 | 31.4  |
| 2258 | 390.25 | 82.73 | 55.18 | 40.09 | 31.4  |
| 2260 | 390.71 | 82.99 | 55.2  | 40.1  | 31.4  |
| 2262 | 391.2  | 83.31 | 55.28 | 40.17 | 31.47 |
| 2264 | 391.67 | 83.58 | 55.28 | 40.16 | 31.44 |
| 2266 | 392.09 | 83.87 | 55.33 | 40.21 | 31.49 |
| 2268 | 392.46 | 84.13 | 55.35 | 40.23 | 31.49 |
| 2270 | 392.93 | 84.45 | 55.39 | 40.28 | 31.52 |
| 2272 | 393.35 | 84.77 | 55.4  | 40.29 | 31.51 |
| 2274 | 393.82 | 85.07 | 55.44 | 40.33 | 31.54 |
| 2276 | 394.29 | 85.35 | 55.48 | 40.36 | 31.55 |
| 2278 | 394.8  | 85.61 | 55.49 | 40.36 | 31.55 |
| 2280 | 395.24 | 85.97 | 55.52 | 40.41 | 31.57 |
| 2282 | 395.65 | 86.29 | 55.56 | 40.45 | 31.6  |
| 2284 | 396.05 | 86.61 | 55.6  | 40.48 | 31.63 |
| 2286 | 396.48 | 86.92 | 55.6  | 40.47 | 31.62 |
| 2288 | 396.87 | 87.2  | 55.62 | 40.48 | 31.62 |
| 2290 | 397.34 | 87.52 | 55.66 | 40.52 | 31.66 |
| 2292 | 397.77 | 87.81 | 55.67 | 40.53 | 31.65 |
| 2294 | 398.25 | 88.16 | 55.68 | 40.54 | 31.64 |
| 2296 | 398.69 | 88.47 | 55.71 | 40.58 | 31.66 |
| 2298 | 399.09 | 88.79 | 55.75 | 40.6  | 31.68 |
| 2300 | 399.48 | 89.1  | 55.77 | 40.63 | 31.69 |
| 2302 | 399.85 | 89.42 | 55.81 | 40.67 | 31.72 |
| 2304 | 400.22 | 89.74 | 55.83 | 40.69 | 31.74 |
| 2306 | 400.71 | 90.1  | 55.84 | 40.7  | 31.74 |
| 2308 | 401.17 | 90.43 | 55.88 | 40.74 | 31.75 |

|      |        |        |       |       |       |
|------|--------|--------|-------|-------|-------|
| 2310 | 401.7  | 90.77  | 55.92 | 40.78 | 31.77 |
| 2312 | 402.12 | 91.14  | 55.94 | 40.79 | 31.79 |
| 2314 | 402.55 | 91.47  | 55.96 | 40.81 | 31.81 |
| 2316 | 402.92 | 91.78  | 55.98 | 40.83 | 31.81 |
| 2318 | 403.36 | 92.15  | 56    | 40.84 | 31.83 |
| 2320 | 403.73 | 92.48  | 56.04 | 40.86 | 31.84 |
| 2322 | 404.11 | 92.83  | 56.05 | 40.9  | 31.85 |
| 2324 | 404.52 | 93.15  | 56.06 | 40.91 | 31.85 |
| 2326 | 404.99 | 93.5   | 56.09 | 40.94 | 31.87 |
| 2328 | 405.51 | 93.89  | 56.1  | 40.97 | 31.89 |
| 2330 | 405.92 | 94.21  | 56.13 | 40.99 | 31.89 |
| 2332 | 406.34 | 94.58  | 56.16 | 41.03 | 31.91 |
| 2334 | 406.78 | 94.93  | 56.18 | 41.05 | 31.93 |
| 2336 | 407.12 | 95.33  | 56.2  | 41.08 | 31.94 |
| 2338 | 407.49 | 95.67  | 56.22 | 41.1  | 31.95 |
| 2340 | 407.92 | 96.04  | 56.27 | 41.14 | 31.98 |
| 2342 | 408.44 | 96.48  | 56.33 | 41.21 | 32.03 |
| 2344 | 408.86 | 96.83  | 56.36 | 41.23 | 32.04 |
| 2346 | 409.26 | 97.18  | 56.36 | 41.23 | 32.04 |
| 2348 | 409.63 | 97.5   | 56.37 | 41.23 | 32.04 |
| 2350 | 410.05 | 97.83  | 56.37 | 41.23 | 32.01 |
| 2352 | 410.4  | 98.23  | 56.38 | 41.24 | 32.03 |
| 2354 | 410.75 | 98.58  | 56.41 | 41.26 | 32.04 |
| 2356 | 411.16 | 98.97  | 56.46 | 41.33 | 32.09 |
| 2358 | 411.63 | 99.32  | 56.47 | 41.35 | 32.1  |
| 2360 | 412.04 | 99.72  | 56.47 | 41.35 | 32.08 |
| 2362 | 412.49 | 100.12 | 56.52 | 41.41 | 32.11 |
| 2364 | 412.88 | 100.48 | 56.55 | 41.44 | 32.15 |
| 2366 | 413.3  | 100.91 | 56.57 | 41.47 | 32.16 |
| 2368 | 413.65 | 101.29 | 56.61 | 41.52 | 32.18 |
| 2370 | 413.97 | 101.63 | 56.6  | 41.51 | 32.17 |
| 2372 | 414.36 | 102    | 56.64 | 41.53 | 32.19 |
| 2374 | 414.84 | 102.37 | 56.68 | 41.57 | 32.22 |
| 2376 | 415.26 | 102.81 | 56.71 | 41.59 | 32.23 |
| 2378 | 415.64 | 103.14 | 56.7  | 41.58 | 32.22 |
| 2380 | 416.01 | 103.49 | 56.71 | 41.61 | 32.24 |
| 2382 | 416.4  | 103.87 | 56.75 | 41.65 | 32.26 |
| 2384 | 416.78 | 104.27 | 56.75 | 41.64 | 32.24 |
| 2386 | 417.13 | 104.66 | 56.78 | 41.68 | 32.27 |
| 2388 | 417.49 | 105.04 | 56.8  | 41.72 | 32.29 |
| 2390 | 417.95 | 105.42 | 56.82 | 41.75 | 32.3  |
| 2392 | 418.37 | 105.9  | 56.87 | 41.79 | 32.33 |
| 2394 | 418.76 | 106.28 | 56.89 | 41.82 | 32.34 |
| 2396 | 419.11 | 106.63 | 56.9  | 41.82 | 32.33 |



|      |        |        |       |       |       |
|------|--------|--------|-------|-------|-------|
| 2398 | 419.53 | 107.1  | 56.94 | 41.88 | 32.38 |
| 2400 | 419.86 | 107.46 | 56.95 | 41.92 | 32.41 |
| 2402 | 420.16 | 107.79 | 56.94 | 41.9  | 32.38 |
| 2404 | 420.53 | 108.17 | 56.96 | 41.92 | 32.39 |
| 2406 | 420.99 | 108.59 | 56.97 | 41.92 | 32.38 |
| 2408 | 421.41 | 108.98 | 57    | 41.96 | 32.4  |
| 2410 | 421.82 | 109.35 | 57.02 | 41.97 | 32.43 |
| 2412 | 422.21 | 109.76 | 57.06 | 42.02 | 32.46 |
| 2414 | 422.63 | 110.13 | 57.09 | 42.04 | 32.48 |
| 2416 | 422.96 | 110.57 | 57.1  | 42.06 | 32.49 |
| 2418 | 423.29 | 110.94 | 57.12 | 42.08 | 32.5  |
| 2420 | 423.62 | 111.33 | 57.13 | 42.11 | 32.5  |
| 2422 | 424.04 | 111.75 | 57.1  | 42.09 | 32.47 |
| 2424 | 424.47 | 112.13 | 57.12 | 42.12 | 32.5  |
| 2426 | 424.91 | 112.52 | 57.16 | 42.17 | 32.51 |
| 2428 | 425.29 | 112.89 | 57.18 | 42.2  | 32.53 |
| 2430 | 425.72 | 113.31 | 57.18 | 42.2  | 32.52 |
| 2432 | 426.04 | 113.69 | 57.19 | 42.22 | 32.52 |
| 2434 | 426.38 | 114.09 | 57.23 | 42.26 | 32.56 |
| 2436 | 426.67 | 114.45 | 57.23 | 42.26 | 32.56 |
| 2438 | 427.13 | 114.84 | 57.24 | 42.29 | 32.57 |
| 2440 | 427.56 | 115.29 | 57.26 | 42.3  | 32.58 |
| 2442 | 427.99 | 115.68 | 57.27 | 42.33 | 32.58 |
| 2444 | 428.43 | 116.08 | 57.31 | 42.35 | 32.6  |
| 2446 | 428.85 | 116.51 | 57.31 | 42.37 | 32.61 |
| 2448 | 429.21 | 116.88 | 57.31 | 42.38 | 32.62 |
| 2450 | 429.55 | 117.31 | 57.34 | 42.44 | 32.63 |
| 2452 | 429.86 | 117.69 | 57.35 | 42.47 | 32.65 |
| 2454 | 430.19 | 118.03 | 57.34 | 42.45 | 32.63 |
| 2456 | 430.69 | 118.47 | 57.36 | 42.47 | 32.65 |
| 2458 | 431.18 | 118.89 | 57.4  | 42.52 | 32.69 |
| 2460 | 431.6  | 119.24 | 57.38 | 42.51 | 32.66 |
| 2462 | 432.05 | 119.66 | 57.43 | 42.57 | 32.7  |
| 2464 | 432.48 | 120.05 | 57.39 | 42.52 | 32.66 |
| 2466 | 432.86 | 120.41 | 57.41 | 42.53 | 32.67 |
| 2468 | 433.22 | 120.8  | 57.42 | 42.55 | 32.68 |
| 2470 | 433.59 | 121.2  | 57.44 | 42.57 | 32.7  |
| 2472 | 434.03 | 121.65 | 57.44 | 42.59 | 32.7  |
| 2474 | 434.49 | 122.05 | 57.46 | 42.61 | 32.72 |
| 2476 | 435    | 122.47 | 57.5  | 42.66 | 32.75 |
| 2478 | 435.58 | 122.86 | 57.5  | 42.66 | 32.74 |
| 2480 | 436.08 | 123.3  | 57.5  | 42.67 | 32.73 |
| 2482 | 436.57 | 123.71 | 57.52 | 42.69 | 32.75 |
| 2484 | 437.07 | 124.13 | 57.53 | 42.7  | 32.75 |

|      |        |        |       |       |       |
|------|--------|--------|-------|-------|-------|
| 2486 | 437.68 | 124.62 | 57.53 | 42.71 | 32.75 |
| 2488 | 438.28 | 124.96 | 57.53 | 42.72 | 32.73 |
| 2490 | 438.95 | 125.46 | 57.57 | 42.75 | 32.75 |
| 2492 | 439.7  | 125.9  | 57.59 | 42.77 | 32.76 |
| 2494 | 440.61 | 126.36 | 57.62 | 42.8  | 32.78 |
| 2496 | 441.4  | 126.91 | 57.64 | 42.81 | 32.78 |
| 2498 | 442.17 | 127.42 | 57.66 | 42.81 | 32.8  |
| 2500 | 442.91 | 127.94 | 57.68 | 42.8  | 32.78 |
| 2502 | 443.8  | 128.71 | 57.74 | 42.84 | 32.8  |
| 2504 | 444.56 | 129.45 | 57.81 | 42.87 | 32.82 |
| 2506 | 445.32 | 130.3  | 57.86 | 42.88 | 32.82 |
| 2508 | 446.15 | 131.23 | 57.92 | 42.91 | 32.84 |
| 2510 | 446.99 | 132.2  | 58    | 42.92 | 32.84 |
| 2512 | 447.97 | 133.43 | 58.11 | 42.94 | 32.85 |
| 2514 | 448.8  | 134.49 | 58.22 | 42.96 | 32.84 |
| 2516 | 449.58 | 135.57 | 58.31 | 42.95 | 32.83 |
| 2518 | 450.51 | 136.92 | 58.46 | 43    | 32.87 |
| 2520 | 451.24 | 138.07 | 58.63 | 43.03 | 32.87 |
| 2522 | 451.99 | 139.24 | 58.81 | 43.07 | 32.92 |
| 2524 | 452.66 | 140.38 | 58.95 | 43.07 | 32.9  |
| 2526 | 453.32 | 141.55 | 59.1  | 43.07 | 32.9  |
| 2528 | 454.06 | 142.91 | 59.27 | 43.1  | 32.91 |
| 2530 | 454.68 | 144.06 | 59.45 | 43.1  | 32.91 |
| 2532 | 455.28 | 145.23 | 59.64 | 43.13 | 32.93 |
| 2534 | 455.97 | 146.41 | 59.81 | 43.15 | 32.94 |
| 2536 | 456.55 | 147.75 | 60.02 | 43.18 | 32.94 |
| 2538 | 457.11 | 148.91 | 60.2  | 43.22 | 32.95 |
| 2540 | 457.63 | 150.04 | 60.36 | 43.24 | 32.95 |
| 2542 | 458.21 | 151.34 | 60.53 | 43.27 | 32.96 |
| 2544 | 458.68 | 152.43 | 60.69 | 43.25 | 32.94 |
| 2546 | 459.16 | 153.56 | 60.9  | 43.32 | 32.99 |
| 2548 | 459.58 | 154.65 | 61.06 | 43.33 | 32.99 |
| 2550 | 459.99 | 155.71 | 61.22 | 43.36 | 33    |
| 2552 | 460.44 | 156.94 | 61.38 | 43.39 | 33.01 |
| 2554 | 460.79 | 157.99 | 61.57 | 43.42 | 33.02 |
| 2556 | 461.11 | 159.03 | 61.73 | 43.45 | 33.03 |
| 2558 | 461.42 | 160.06 | 61.87 | 43.48 | 33.04 |
| 2560 | 461.67 | 161.23 | 62.01 | 43.5  | 33.04 |
| 2562 | 461.88 | 162.24 | 62.17 | 43.54 | 33.06 |
| 2564 | 462.07 | 163.22 | 62.31 | 43.58 | 33.09 |
| 2566 | 462.23 | 164.19 | 62.44 | 43.62 | 33.09 |
| 2568 | 462.35 | 165.29 | 62.57 | 43.65 | 33.09 |
| 2570 | 462.46 | 166.27 | 62.7  | 43.69 | 33.13 |
| 2572 | 462.51 | 167.2  | 62.82 | 43.73 | 33.13 |

|      |        |        |       |       |       |
|------|--------|--------|-------|-------|-------|
| 2574 | 462.53 | 168.13 | 62.92 | 43.75 | 33.13 |
| 2576 | 462.57 | 169.22 | 63.03 | 43.79 | 33.16 |
| 2578 | 462.54 | 170.12 | 63.15 | 43.84 | 33.18 |
| 2580 | 462.53 | 171.06 | 63.27 | 43.89 | 33.2  |
| 2582 | 462.47 | 171.98 | 63.39 | 43.94 | 33.23 |
| 2584 | 462.39 | 173.03 | 63.48 | 43.96 | 33.24 |
| 2586 | 462.3  | 173.95 | 63.59 | 44.03 | 33.25 |
| 2588 | 462.18 | 174.83 | 63.68 | 44.06 | 33.25 |
| 2590 | 462.04 | 175.7  | 63.74 | 44.08 | 33.27 |
| 2592 | 461.85 | 176.56 | 63.82 | 44.11 | 33.26 |
| 2594 | 461.7  | 177.57 | 63.91 | 44.13 | 33.26 |
| 2596 | 461.53 | 178.44 | 63.98 | 44.17 | 33.25 |
| 2598 | 461.33 | 179.32 | 64.07 | 44.21 | 33.27 |
| 2600 | 461.18 | 180.36 | 64.2  | 44.28 | 33.31 |
| 2602 | 461    | 181.24 | 64.29 | 44.32 | 33.33 |
| 2604 | 460.77 | 182.09 | 64.38 | 44.36 | 33.32 |
| 2606 | 460.49 | 182.93 | 64.46 | 44.39 | 33.33 |
| 2608 | 460.26 | 183.94 | 64.56 | 44.44 | 33.34 |
| 2610 | 460.02 | 184.82 | 64.67 | 44.51 | 33.38 |
| 2612 | 459.78 | 185.73 | 64.78 | 44.59 | 33.43 |
| 2614 | 459.48 | 186.55 | 64.83 | 44.61 | 33.41 |
| 2616 | 459.13 | 187.55 | 64.91 | 44.66 | 33.41 |
| 2618 | 458.85 | 188.43 | 65.01 | 44.72 | 33.44 |
| 2620 | 458.47 | 189.24 | 65.04 | 44.74 | 33.42 |
| 2622 | 458.11 | 190.14 | 65.17 | 44.83 | 33.48 |
| 2624 | 457.78 | 191.17 | 65.27 | 44.89 | 33.53 |
| 2626 | 457.43 | 192.04 | 65.34 | 44.98 | 33.55 |
| 2628 | 457.04 | 192.89 | 65.4  | 45.03 | 33.57 |
| 2630 | 456.66 | 193.75 | 65.47 | 45.06 | 33.58 |
| 2632 | 456.17 | 194.74 | 65.51 | 45.1  | 33.57 |
| 2634 | 455.8  | 195.64 | 65.59 | 45.18 | 33.61 |
| 2636 | 455.4  | 196.52 | 65.66 | 45.25 | 33.65 |
| 2638 | 454.98 | 197.38 | 65.69 | 45.28 | 33.65 |
| 2640 | 454.5  | 198.4  | 65.73 | 45.34 | 33.66 |
| 2642 | 454.08 | 199.28 | 65.79 | 45.4  | 33.66 |
| 2644 | 453.67 | 200.2  | 65.86 | 45.47 | 33.71 |
| 2646 | 453.2  | 201.1  | 65.92 | 45.54 | 33.74 |
| 2648 | 452.79 | 202.13 | 65.96 | 45.59 | 33.77 |
| 2650 | 452.36 | 203.01 | 66.01 | 45.67 | 33.8  |
| 2652 | 451.94 | 203.91 | 66.05 | 45.72 | 33.81 |
| 2654 | 451.56 | 204.85 | 66.13 | 45.83 | 33.88 |
| 2656 | 451.04 | 205.84 | 66.14 | 45.85 | 33.87 |
| 2658 | 450.64 | 206.76 | 66.2  | 45.92 | 33.89 |
| 2660 | 450.2  | 207.64 | 66.22 | 45.97 | 33.91 |

|      |        |        |       |       |       |
|------|--------|--------|-------|-------|-------|
| 2662 | 449.7  | 208.51 | 66.26 | 46.02 | 33.92 |
| 2664 | 449.31 | 209.57 | 66.3  | 46.09 | 33.95 |
| 2666 | 448.88 | 210.44 | 66.34 | 46.15 | 33.97 |
| 2668 | 448.46 | 211.34 | 66.38 | 46.22 | 34.01 |
| 2670 | 448.02 | 212.22 | 66.4  | 46.26 | 34    |
| 2672 | 447.55 | 213.27 | 66.46 | 46.32 | 34.03 |
| 2674 | 447.15 | 214.17 | 66.5  | 46.39 | 34.06 |
| 2676 | 446.72 | 215.06 | 66.55 | 46.46 | 34.09 |
| 2678 | 446.3  | 215.95 | 66.6  | 46.52 | 34.11 |
| 2680 | 445.81 | 216.99 | 66.65 | 46.58 | 34.13 |
| 2682 | 445.4  | 217.86 | 66.7  | 46.65 | 34.16 |
| 2684 | 444.98 | 218.74 | 66.76 | 46.69 | 34.19 |
| 2686 | 444.55 | 219.63 | 66.8  | 46.75 | 34.2  |
| 2688 | 444.07 | 220.52 | 66.88 | 46.82 | 34.23 |
| 2690 | 443.64 | 221.54 | 66.94 | 46.9  | 34.25 |
| 2692 | 443.24 | 222.42 | 67.01 | 46.97 | 34.29 |
| 2694 | 442.79 | 223.28 | 67.05 | 47.01 | 34.3  |
| 2696 | 442.29 | 224.14 | 67.12 | 47.07 | 34.33 |
| 2698 | 441.87 | 225.16 | 67.2  | 47.13 | 34.35 |
| 2700 | 441.44 | 226.04 | 67.26 | 47.2  | 34.38 |
| 2702 | 440.94 | 226.92 | 67.34 | 47.28 | 34.43 |
| 2704 | 440.52 | 227.91 | 67.39 | 47.32 | 34.44 |
| 2706 | 440.1  | 228.77 | 67.48 | 47.41 | 34.46 |
| 2708 | 439.66 | 229.61 | 67.55 | 47.46 | 34.49 |
| 2710 | 439.17 | 230.49 | 67.63 | 47.55 | 34.54 |
| 2712 | 438.75 | 231.49 | 67.71 | 47.6  | 34.56 |
| 2714 | 438.31 | 232.32 | 67.76 | 47.65 | 34.57 |
| 2716 | 437.88 | 233.17 | 67.84 | 47.71 | 34.6  |
| 2718 | 437.47 | 234.04 | 67.93 | 47.8  | 34.65 |
| 2720 | 436.94 | 235.01 | 67.98 | 47.84 | 34.65 |
| 2722 | 436.52 | 235.85 | 68.06 | 47.89 | 34.68 |
| 2724 | 436.13 | 236.74 | 68.17 | 48.02 | 34.75 |
| 2726 | 435.71 | 237.59 | 68.25 | 48.09 | 34.79 |
| 2728 | 435.21 | 238.58 | 68.34 | 48.16 | 34.82 |
| 2730 | 434.74 | 239.4  | 68.38 | 48.2  | 34.82 |
| 2732 | 434.33 | 240.27 | 68.49 | 48.3  | 34.89 |
| 2734 | 433.93 | 241.12 | 68.58 | 48.38 | 34.92 |
| 2736 | 433.42 | 242.11 | 68.65 | 48.44 | 34.94 |
| 2738 | 432.99 | 242.93 | 68.71 | 48.51 | 34.97 |
| 2740 | 432.54 | 243.75 | 68.78 | 48.57 | 34.99 |
| 2742 | 432.12 | 244.61 | 68.86 | 48.65 | 35.02 |
| 2744 | 431.62 | 245.56 | 68.92 | 48.7  | 35.05 |
| 2746 | 431.2  | 246.42 | 69.03 | 48.78 | 35.08 |
| 2748 | 430.77 | 247.27 | 69.1  | 48.86 | 35.11 |

|      |        |        |       |       |       |
|------|--------|--------|-------|-------|-------|
| 2750 | 430.31 | 248.06 | 69.14 | 48.9  | 35.11 |
| 2752 | 429.81 | 249.03 | 69.24 | 48.96 | 35.12 |
| 2754 | 429.38 | 249.88 | 69.31 | 49.04 | 35.14 |
| 2756 | 428.95 | 250.7  | 69.38 | 49.1  | 35.18 |
| 2758 | 428.56 | 251.57 | 69.48 | 49.19 | 35.23 |
| 2760 | 428.05 | 252.54 | 69.57 | 49.28 | 35.25 |
| 2762 | 427.61 | 253.38 | 69.63 | 49.33 | 35.26 |
| 2764 | 427.19 | 254.22 | 69.73 | 49.42 | 35.31 |
| 2766 | 426.77 | 255.07 | 69.82 | 49.49 | 35.35 |
| 2768 | 426.27 | 256.03 | 69.89 | 49.55 | 35.37 |
| 2770 | 425.89 | 256.91 | 70.01 | 49.66 | 35.43 |
| 2772 | 425.44 | 257.72 | 70.06 | 49.71 | 35.44 |
| 2774 | 425    | 258.55 | 70.12 | 49.76 | 35.45 |
| 2776 | 424.61 | 259.44 | 70.25 | 49.88 | 35.54 |
| 2778 | 424.13 | 260.44 | 70.34 | 49.98 | 35.57 |
| 2780 | 423.72 | 261.28 | 70.42 | 50.05 | 35.6  |
| 2782 | 423.28 | 262.1  | 70.47 | 50.1  | 35.61 |
| 2784 | 422.83 | 262.98 | 70.59 | 50.2  | 35.66 |
| 2786 | 422.4  | 263.96 | 70.67 | 50.27 | 35.68 |
| 2788 | 421.98 | 264.81 | 70.76 | 50.35 | 35.72 |
| 2790 | 421.58 | 265.66 | 70.85 | 50.44 | 35.76 |
| 2792 | 421.13 | 266.69 | 70.97 | 50.56 | 35.82 |
| 2794 | 420.7  | 267.52 | 71.04 | 50.62 | 35.81 |
| 2796 | 420.28 | 268.38 | 71.15 | 50.7  | 35.87 |
| 2798 | 419.87 | 269.25 | 71.25 | 50.77 | 35.9  |
| 2800 | 419.46 | 270.11 | 71.34 | 50.86 | 35.94 |
| 2802 | 418.98 | 271.12 | 71.46 | 50.96 | 35.97 |
| 2804 | 418.57 | 271.98 | 71.55 | 51.03 | 36.01 |
| 2806 | 418.17 | 272.85 | 71.65 | 51.11 | 36.05 |
| 2808 | 417.72 | 273.73 | 71.76 | 51.21 | 36.11 |
| 2810 | 417.3  | 274.73 | 71.85 | 51.28 | 36.12 |
| 2812 | 416.89 | 275.6  | 71.93 | 51.37 | 36.15 |
| 2814 | 416.41 | 276.46 | 72.03 | 51.44 | 36.2  |
| 2816 | 416    | 277.46 | 72.12 | 51.52 | 36.23 |
| 2818 | 415.61 | 278.34 | 72.22 | 51.63 | 36.29 |
| 2820 | 415.21 | 279.2  | 72.31 | 51.69 | 36.32 |
| 2822 | 414.83 | 280.1  | 72.41 | 51.79 | 36.36 |
| 2824 | 414.34 | 280.97 | 72.49 | 51.86 | 36.4  |
| 2826 | 413.96 | 282    | 72.58 | 51.95 | 36.44 |
| 2828 | 413.56 | 282.89 | 72.7  | 52.07 | 36.5  |
| 2830 | 413.14 | 283.75 | 72.76 | 52.13 | 36.52 |
| 2832 | 412.71 | 284.81 | 72.86 | 52.23 | 36.58 |
| 2834 | 412.32 | 285.68 | 72.96 | 52.32 | 36.63 |
| 2836 | 411.95 | 286.58 | 73.08 | 52.46 | 36.7  |

|      |        |        |       |       |       |
|------|--------|--------|-------|-------|-------|
| 2838 | 411.52 | 287.46 | 73.14 | 52.53 | 36.72 |
| 2840 | 411.1  | 288.52 | 73.25 | 52.65 | 36.77 |
| 2842 | 410.72 | 289.41 | 73.37 | 52.76 | 36.82 |
| 2844 | 410.33 | 290.29 | 73.45 | 52.85 | 36.87 |
| 2846 | 409.9  | 291.15 | 73.51 | 52.91 | 36.89 |
| 2848 | 409.49 | 292.02 | 73.57 | 52.97 | 36.9  |
| 2850 | 409.07 | 293.09 | 73.68 | 53.08 | 36.97 |
| 2852 | 408.69 | 294    | 73.81 | 53.2  | 37.02 |
| 2854 | 408.3  | 294.87 | 73.88 | 53.28 | 37.05 |
| 2856 | 407.87 | 295.76 | 73.98 | 53.38 | 37.12 |
| 2858 | 407.49 | 296.81 | 74.09 | 53.47 | 37.15 |
| 2860 | 407.1  | 297.67 | 74.15 | 53.55 | 37.2  |
| 2862 | 406.74 | 298.59 | 74.26 | 53.67 | 37.25 |
| 2864 | 406.29 | 299.62 | 74.34 | 53.76 | 37.29 |
| 2866 | 405.93 | 300.52 | 74.46 | 53.86 | 37.34 |
| 2868 | 405.55 | 301.4  | 74.53 | 53.96 | 37.38 |
| 2870 | 405.16 | 302.28 | 74.6  | 54.05 | 37.41 |
| 2872 | 404.76 | 303.2  | 74.7  | 54.14 | 37.46 |
| 2874 | 404.4  | 304.25 | 74.83 | 54.26 | 37.52 |
| 2876 | 404.03 | 305.14 | 74.91 | 54.37 | 37.57 |
| 2878 | 403.68 | 306.05 | 75.01 | 54.47 | 37.63 |
| 2880 | 403.27 | 307.09 | 75.11 | 54.57 | 37.68 |
| 2882 | 402.88 | 307.98 | 75.2  | 54.67 | 37.71 |
| 2884 | 402.52 | 308.87 | 75.29 | 54.76 | 37.76 |
| 2886 | 402.18 | 309.77 | 75.4  | 54.86 | 37.83 |
| 2888 | 401.74 | 310.65 | 75.47 | 54.93 | 37.86 |
| 2890 | 401.4  | 311.69 | 75.57 | 55.03 | 37.91 |
| 2892 | 401.05 | 312.59 | 75.67 | 55.15 | 37.97 |
| 2894 | 400.7  | 313.49 | 75.77 | 55.26 | 38.03 |
| 2896 | 400.33 | 314.59 | 75.89 | 55.39 | 38.11 |
| 2898 | 399.98 | 315.49 | 76    | 55.5  | 38.17 |
| 2900 | 399.61 | 316.35 | 76.08 | 55.6  | 38.22 |
| 2902 | 399.3  | 317.28 | 76.19 | 55.72 | 38.27 |
| 2904 | 398.94 | 318.16 | 76.24 | 55.79 | 38.29 |
| 2906 | 398.49 | 319.16 | 76.31 | 55.88 | 38.32 |
| 2908 | 398.17 | 320.07 | 76.42 | 56    | 38.4  |
| 2910 | 397.83 | 320.97 | 76.5  | 56.09 | 38.45 |
| 2912 | 397.45 | 321.87 | 76.57 | 56.19 | 38.5  |
| 2914 | 397.13 | 322.92 | 76.68 | 56.31 | 38.56 |
| 2916 | 396.79 | 323.81 | 76.76 | 56.41 | 38.62 |
| 2918 | 396.45 | 324.7  | 76.84 | 56.51 | 38.68 |
| 2920 | 396.06 | 325.74 | 76.92 | 56.6  | 38.75 |
| 2922 | 395.75 | 326.65 | 77.01 | 56.74 | 38.82 |
| 2924 | 395.45 | 327.57 | 77.12 | 56.87 | 38.91 |

|      |        |        |       |       |       |
|------|--------|--------|-------|-------|-------|
| 2926 | 395.12 | 328.48 | 77.21 | 56.99 | 38.97 |
| 2928 | 394.75 | 329.36 | 77.28 | 57.07 | 39.01 |
| 2930 | 394.44 | 330.41 | 77.37 | 57.19 | 39.09 |
| 2932 | 394.12 | 331.31 | 77.46 | 57.31 | 39.17 |
| 2934 | 393.79 | 332.19 | 77.54 | 57.41 | 39.22 |
| 2936 | 393.42 | 333.22 | 77.6  | 57.5  | 39.26 |
| 2938 | 393.09 | 334.08 | 77.67 | 57.58 | 39.32 |
| 2940 | 392.83 | 335.04 | 77.8  | 57.76 | 39.45 |
| 2942 | 392.54 | 335.92 | 77.88 | 57.87 | 39.51 |
| 2944 | 392.15 | 336.91 | 77.92 | 57.95 | 39.54 |
| 2946 | 391.84 | 337.77 | 78    | 58.05 | 39.59 |
| 2948 | 391.53 | 338.65 | 78.06 | 58.15 | 39.66 |
| 2950 | 391.22 | 339.53 | 78.13 | 58.24 | 39.72 |
| 2952 | 390.86 | 340.4  | 78.2  | 58.34 | 39.78 |
| 2954 | 390.55 | 341.39 | 78.27 | 58.45 | 39.84 |
| 2956 | 390.23 | 342.23 | 78.31 | 58.55 | 39.88 |
| 2958 | 389.94 | 343.09 | 78.37 | 58.65 | 39.95 |
| 2960 | 389.62 | 344.12 | 78.45 | 58.78 | 40.05 |
| 2962 | 389.29 | 344.92 | 78.49 | 58.86 | 40.07 |
| 2964 | 389    | 345.78 | 78.54 | 58.94 | 40.15 |
| 2966 | 388.74 | 346.68 | 78.62 | 59.07 | 40.25 |
| 2968 | 388.36 | 347.45 | 78.59 | 59.11 | 40.26 |
| 2970 | 388.04 | 348.46 | 78.66 | 59.25 | 40.35 |
| 2972 | 387.75 | 349.31 | 78.69 | 59.35 | 40.42 |
| 2974 | 387.44 | 350.15 | 78.72 | 59.44 | 40.47 |
| 2976 | 387.07 | 350.98 | 78.73 | 59.49 | 40.5  |
| 2978 | 386.78 | 351.97 | 78.78 | 59.6  | 40.59 |
| 2980 | 386.51 | 352.84 | 78.82 | 59.73 | 40.67 |
| 2982 | 386.23 | 353.7  | 78.85 | 59.81 | 40.74 |
| 2984 | 385.9  | 354.7  | 78.89 | 59.91 | 40.81 |
| 2986 | 385.62 | 355.58 | 78.93 | 60.01 | 40.87 |
| 2988 | 385.3  | 356.41 | 78.94 | 60.06 | 40.93 |
| 2990 | 385    | 357.27 | 78.97 | 60.15 | 40.98 |
| 2992 | 384.71 | 358.2  | 79.04 | 60.27 | 41.08 |
| 2994 | 384.44 | 359.24 | 79.09 | 60.37 | 41.16 |
| 2996 | 384.16 | 360.12 | 79.14 | 60.47 | 41.24 |
| 2998 | 383.88 | 361.01 | 79.17 | 60.55 | 41.29 |
| 3000 | 383.56 | 362.04 | 79.22 | 60.63 | 41.36 |
| 3002 | 383.28 | 362.92 | 79.25 | 60.7  | 41.42 |
| 3004 | 383.01 | 363.81 | 79.3  | 60.79 | 41.5  |
| 3006 | 382.76 | 364.72 | 79.36 | 60.9  | 41.58 |
| 3008 | 382.44 | 365.75 | 79.41 | 60.97 | 41.65 |
| 3010 | 382.16 | 366.61 | 79.44 | 61.02 | 41.69 |
| 3012 | 381.89 | 367.5  | 79.5  | 61.1  | 41.76 |

|      |        |        |       |       |       |
|------|--------|--------|-------|-------|-------|
| 3014 | 381.63 | 368.39 | 79.55 | 61.17 | 41.82 |
| 3016 | 381.37 | 369.31 | 79.66 | 61.29 | 41.92 |
| 3018 | 381.1  | 370.34 | 79.74 | 61.37 | 42    |
| 3020 | 380.85 | 371.21 | 79.8  | 61.44 | 42.07 |
| 3022 | 380.58 | 372.07 | 79.86 | 61.49 | 42.11 |
| 3024 | 380.26 | 373.07 | 79.93 | 61.55 | 42.17 |
| 3026 | 380.04 | 373.96 | 80.06 | 61.65 | 42.25 |
| 3028 | 379.76 | 374.79 | 80.14 | 61.69 | 42.29 |
| 3030 | 379.51 | 375.65 | 80.25 | 61.75 | 42.34 |
| 3032 | 379.24 | 376.52 | 80.4  | 61.82 | 42.42 |
| 3034 | 379    | 377.54 | 80.58 | 61.92 | 42.5  |
| 3036 | 378.74 | 378.36 | 80.72 | 61.97 | 42.55 |
| 3038 | 378.51 | 379.22 | 80.95 | 62.05 | 42.62 |
| 3040 | 378.22 | 380.18 | 81.14 | 62.1  | 42.67 |
| 3042 | 378    | 381.04 | 81.49 | 62.21 | 42.78 |
| 3044 | 377.75 | 381.86 | 81.78 | 62.26 | 42.84 |
| 3046 | 377.51 | 382.71 | 82.13 | 62.33 | 42.92 |
| 3048 | 377.2  | 383.64 | 82.49 | 62.36 | 42.95 |
| 3050 | 376.95 | 384.45 | 82.87 | 62.4  | 43.02 |
| 3052 | 376.72 | 385.27 | 83.38 | 62.47 | 43.09 |
| 3054 | 376.49 | 386.09 | 83.83 | 62.53 | 43.16 |
| 3056 | 376.2  | 386.87 | 84.3  | 62.58 | 43.22 |
| 3058 | 375.94 | 387.79 | 84.85 | 62.6  | 43.25 |
| 3060 | 375.76 | 388.64 | 85.39 | 62.72 | 43.37 |
| 3062 | 375.51 | 389.42 | 85.88 | 62.74 | 43.4  |
| 3064 | 375.25 | 390.36 | 86.45 | 62.81 | 43.47 |
| 3066 | 375.03 | 391.17 | 87.12 | 62.9  | 43.56 |
| 3068 | 374.81 | 391.96 | 87.7  | 62.95 | 43.63 |
| 3070 | 374.56 | 392.72 | 88.29 | 62.99 | 43.68 |
| 3072 | 374.29 | 393.5  | 88.9  | 63.03 | 43.73 |
| 3074 | 374.03 | 394.36 | 89.48 | 63.04 | 43.74 |
| 3076 | 373.81 | 395.14 | 90.23 | 63.1  | 43.81 |
| 3078 | 373.58 | 395.91 | 90.9  | 63.15 | 43.87 |
| 3080 | 373.33 | 396.71 | 91.59 | 63.21 | 43.96 |
| 3082 | 373.06 | 397.56 | 92.37 | 63.23 | 44    |
| 3084 | 372.87 | 398.32 | 93.1  | 63.28 | 44.09 |
| 3086 | 372.63 | 399.06 | 93.79 | 63.32 | 44.12 |
| 3088 | 372.38 | 399.97 | 94.56 | 63.4  | 44.21 |
| 3090 | 372.19 | 400.75 | 95.46 | 63.46 | 44.29 |
| 3092 | 371.97 | 401.5  | 96.23 | 63.52 | 44.36 |
| 3094 | 371.76 | 402.24 | 97.02 | 63.56 | 44.43 |
| 3096 | 371.46 | 402.95 | 97.78 | 63.56 | 44.43 |
| 3098 | 371.27 | 403.85 | 98.75 | 63.65 | 44.52 |
| 3100 | 371.07 | 404.6  | 99.58 | 63.71 | 44.58 |



|      |        |        |        |       |       |
|------|--------|--------|--------|-------|-------|
| 3102 | 370.86 | 405.34 | 100.42 | 63.74 | 44.66 |
| 3104 | 370.61 | 406.19 | 101.25 | 63.78 | 44.71 |
| 3106 | 370.39 | 406.92 | 102.26 | 63.83 | 44.76 |
| 3108 | 370.18 | 407.66 | 103.13 | 63.85 | 44.83 |
| 3110 | 369.93 | 408.37 | 104    | 63.89 | 44.88 |
| 3112 | 369.71 | 409.06 | 104.87 | 63.93 | 44.92 |
| 3114 | 369.54 | 409.81 | 105.8  | 63.98 | 44.99 |
| 3116 | 369.3  | 410.66 | 106.87 | 64.01 | 45.06 |
| 3118 | 369.07 | 411.36 | 107.75 | 64.03 | 45.1  |
| 3120 | 368.89 | 412.09 | 108.69 | 64.08 | 45.17 |
| 3122 | 368.66 | 412.9  | 109.79 | 64.12 | 45.22 |
| 3124 | 368.46 | 413.63 | 110.76 | 64.17 | 45.3  |
| 3126 | 368.28 | 414.34 | 111.73 | 64.22 | 45.37 |
| 3128 | 368.05 | 415.01 | 112.66 | 64.21 | 45.4  |
| 3130 | 367.84 | 415.85 | 113.64 | 64.28 | 45.47 |
| 3132 | 367.65 | 416.55 | 114.8  | 64.33 | 45.52 |
| 3134 | 367.43 | 417.23 | 115.76 | 64.33 | 45.56 |
| 3136 | 367.2  | 417.91 | 116.76 | 64.37 | 45.63 |
| 3138 | 367.02 | 418.71 | 117.96 | 64.43 | 45.7  |
| 3140 | 366.82 | 419.4  | 118.97 | 64.48 | 45.74 |
| 3142 | 366.63 | 420.08 | 119.99 | 64.52 | 45.81 |
| 3144 | 366.43 | 420.76 | 121    | 64.55 | 45.86 |
| 3146 | 366.17 | 421.49 | 122.17 | 64.55 | 45.88 |
| 3148 | 365.98 | 422.17 | 123.22 | 64.6  | 45.96 |
| 3150 | 365.74 | 422.79 | 124.23 | 64.6  | 45.97 |
| 3152 | 365.56 | 423.45 | 125.3  | 64.64 | 46.03 |
| 3154 | 365.32 | 424.21 | 126.34 | 64.65 | 46.06 |
| 3156 | 365.13 | 424.87 | 127.59 | 64.73 | 46.14 |
| 3158 | 364.93 | 425.5  | 128.63 | 64.76 | 46.2  |
| 3160 | 364.7  | 426.14 | 129.71 | 64.79 | 46.24 |
| 3162 | 364.52 | 426.9  | 130.98 | 64.84 | 46.3  |
| 3164 | 364.31 | 427.51 | 132.04 | 64.88 | 46.34 |
| 3166 | 364.09 | 428.13 | 133.12 | 64.89 | 46.37 |
| 3168 | 363.88 | 428.75 | 134.2  | 64.9  | 46.42 |
| 3170 | 363.65 | 429.37 | 135.3  | 64.95 | 46.47 |
| 3172 | 363.45 | 430.09 | 136.59 | 64.99 | 46.51 |
| 3174 | 363.26 | 430.72 | 137.7  | 65.02 | 46.57 |
| 3176 | 363.04 | 431.31 | 138.78 | 65.03 | 46.6  |
| 3178 | 362.81 | 432.01 | 140.08 | 65.06 | 46.64 |
| 3180 | 362.59 | 432.59 | 141.17 | 65.06 | 46.67 |
| 3182 | 362.42 | 433.21 | 142.32 | 65.11 | 46.75 |
| 3184 | 362.24 | 433.82 | 143.46 | 65.16 | 46.82 |
| 3186 | 362.02 | 434.52 | 144.6  | 65.2  | 46.88 |
| 3188 | 361.84 | 435.15 | 145.95 | 65.26 | 46.94 |

|      |        |        |        |       |       |
|------|--------|--------|--------|-------|-------|
| 3190 | 361.67 | 435.75 | 147.11 | 65.31 | 47.01 |
| 3192 | 361.44 | 436.32 | 148.24 | 65.33 | 47.03 |
| 3194 | 361.28 | 437.03 | 149.62 | 65.39 | 47.11 |
| 3196 | 361.07 | 437.59 | 150.74 | 65.41 | 47.13 |
| 3198 | 360.91 | 438.2  | 151.94 | 65.47 | 47.21 |
| 3200 | 360.67 | 438.84 | 153.1  | 65.49 | 47.23 |
| 3202 | 360.46 | 439.39 | 154.43 | 65.5  | 47.25 |
| 3204 | 360.31 | 440.01 | 155.64 | 65.59 | 47.36 |
| 3206 | 360.13 | 440.57 | 156.83 | 65.64 | 47.41 |
| 3208 | 359.91 | 441.11 | 158    | 65.66 | 47.45 |
| 3210 | 359.73 | 441.78 | 159.22 | 65.71 | 47.52 |
| 3212 | 359.55 | 442.35 | 160.61 | 65.74 | 47.55 |
| 3214 | 359.31 | 442.86 | 161.76 | 65.74 | 47.55 |
| 3216 | 359.09 | 443.4  | 162.95 | 65.77 | 47.6  |
| 3218 | 358.95 | 443.97 | 164.18 | 65.85 | 47.69 |
| 3220 | 358.76 | 444.61 | 165.59 | 65.88 | 47.73 |
| 3222 | 358.6  | 445.17 | 166.83 | 65.94 | 47.81 |
| 3224 | 358.4  | 445.69 | 168.04 | 65.97 | 47.85 |
| 3226 | 358.2  | 446.33 | 169.47 | 66.02 | 47.91 |
| 3228 | 358.03 | 446.86 | 170.49 | 66.06 | 47.96 |
| 3230 | 357.83 | 447.38 | 171.92 | 66.1  | 48    |
| 3232 | 357.63 | 447.91 | 173.19 | 66.15 | 48.06 |
| 3234 | 357.46 | 448.53 | 174.63 | 66.2  | 48.11 |
| 3236 | 357.28 | 449.06 | 175.87 | 66.25 | 48.16 |
| 3238 | 357.08 | 449.56 | 177.1  | 66.27 | 48.2  |
| 3240 | 356.9  | 450.06 | 178.35 | 66.3  | 48.25 |
| 3242 | 356.68 | 450.57 | 179.59 | 66.33 | 48.3  |
| 3244 | 356.52 | 451.18 | 181.07 | 66.38 | 48.36 |
| 3246 | 356.36 | 451.68 | 182.34 | 66.44 | 48.45 |
| 3248 | 356.17 | 452.18 | 183.6  | 66.48 | 48.5  |
| 3250 | 356    | 452.79 | 184.91 | 66.56 | 48.6  |
| 3252 | 355.8  | 453.26 | 186.38 | 66.57 | 48.62 |
| 3254 | 355.62 | 453.75 | 187.66 | 66.63 | 48.67 |
| 3256 | 355.45 | 454.25 | 188.96 | 66.68 | 48.73 |
| 3258 | 355.26 | 454.83 | 190.47 | 66.74 | 48.8  |
| 3260 | 355.11 | 455.34 | 191.79 | 66.81 | 48.9  |
| 3262 | 354.92 | 455.8  | 193.07 | 66.83 | 48.95 |
| 3264 | 354.71 | 456.25 | 194.32 | 66.84 | 48.96 |
| 3266 | 354.5  | 456.81 | 195.63 | 66.88 | 49.01 |
| 3268 | 354.33 | 457.28 | 197.16 | 66.93 | 49.07 |
| 3270 | 354.16 | 457.76 | 198.49 | 66.99 | 49.15 |
| 3272 | 353.99 | 458.22 | 199.82 | 67.03 | 49.22 |
| 3274 | 353.78 | 458.77 | 201.14 | 67.07 | 49.26 |
| 3276 | 353.6  | 459.23 | 202.69 | 67.12 | 49.31 |

|      |        |        |        |       |       |
|------|--------|--------|--------|-------|-------|
| 3278 | 353.44 | 459.69 | 204.04 | 67.19 | 49.38 |
| 3280 | 353.25 | 460.14 | 205.36 | 67.22 | 49.42 |
| 3282 | 353.05 | 460.61 | 206.72 | 67.27 | 49.49 |
| 3284 | 352.89 | 461.16 | 208.29 | 67.33 | 49.55 |
| 3286 | 352.74 | 461.62 | 209.65 | 67.4  | 49.63 |
| 3288 | 352.53 | 462.03 | 210.98 | 67.42 | 49.66 |
| 3290 | 352.37 | 462.6  | 212.38 | 67.52 | 49.77 |
| 3292 | 352.2  | 463.04 | 213.98 | 67.58 | 49.82 |
| 3294 | 352.01 | 463.46 | 215.34 | 67.62 | 49.88 |
| 3296 | 351.83 | 463.88 | 216.72 | 67.67 | 49.93 |
| 3298 | 351.61 | 464.38 | 218.06 | 67.69 | 49.97 |
| 3300 | 351.45 | 464.81 | 219.68 | 67.75 | 50.02 |
| 3302 | 351.28 | 465.26 | 221.09 | 67.83 | 50.11 |
| 3304 | 351.1  | 465.67 | 222.46 | 67.87 | 50.16 |
| 3306 | 350.93 | 466.1  | 223.86 | 67.92 | 50.22 |
| 3308 | 350.73 | 466.59 | 225.5  | 67.99 | 50.29 |
| 3310 | 350.55 | 467    | 226.9  | 68.04 | 50.36 |
| 3312 | 350.35 | 467.4  | 228.3  | 68.08 | 50.42 |
| 3314 | 350.12 | 467.79 | 229.67 | 68.1  | 50.45 |
| 3316 | 349.93 | 468.25 | 231.31 | 68.13 | 50.51 |
| 3318 | 349.76 | 468.65 | 232.72 | 68.18 | 50.58 |
| 3320 | 349.58 | 469.06 | 234.15 | 68.23 | 50.63 |
| 3322 | 349.39 | 469.56 | 235.59 | 68.32 | 50.73 |
| 3324 | 349.23 | 469.97 | 237.26 | 68.39 | 50.8  |
| 3326 | 349.02 | 470.34 | 238.66 | 68.43 | 50.86 |
| 3328 | 348.86 | 470.73 | 240.1  | 68.49 | 50.93 |
| 3330 | 348.68 | 471.13 | 241.53 | 68.54 | 50.98 |
| 3332 | 348.45 | 471.53 | 242.94 | 68.58 | 51.03 |
| 3334 | 348.24 | 471.92 | 244.56 | 68.59 | 51.05 |
| 3336 | 348.06 | 472.32 | 246    | 68.68 | 51.15 |
| 3338 | 347.84 | 472.67 | 247.4  | 68.7  | 51.18 |
| 3340 | 347.69 | 473.15 | 248.84 | 68.78 | 51.27 |
| 3342 | 347.49 | 473.5  | 250.47 | 68.8  | 51.31 |
| 3344 | 347.29 | 473.85 | 251.86 | 68.84 | 51.35 |
| 3346 | 347.07 | 474.28 | 253.25 | 68.87 | 51.4  |
| 3348 | 346.93 | 474.68 | 254.92 | 68.95 | 51.48 |
| 3350 | 346.72 | 475.05 | 256.31 | 69.01 | 51.55 |
| 3352 | 346.53 | 475.4  | 257.69 | 69.06 | 51.6  |
| 3354 | 346.36 | 475.77 | 259.12 | 69.12 | 51.67 |
| 3356 | 346.16 | 476.21 | 260.75 | 69.17 | 51.73 |
| 3358 | 345.97 | 476.57 | 262.12 | 69.23 | 51.8  |
| 3360 | 345.79 | 476.92 | 263.49 | 69.29 | 51.87 |
| 3362 | 345.6  | 477.34 | 264.87 | 69.35 | 51.93 |
| 3364 | 345.42 | 477.68 | 266.46 | 69.4  | 51.99 |

|      |        |        |        |       |       |
|------|--------|--------|--------|-------|-------|
| 3366 | 345.25 | 478.04 | 267.85 | 69.47 | 52.08 |
| 3368 | 345.07 | 478.38 | 269.21 | 69.53 | 52.16 |
| 3370 | 344.84 | 478.71 | 270.56 | 69.58 | 52.21 |
| 3372 | 344.67 | 479.13 | 272.16 | 69.65 | 52.3  |
| 3374 | 344.48 | 479.46 | 273.49 | 69.68 | 52.38 |
| 3376 | 344.29 | 479.78 | 274.84 | 69.73 | 52.44 |
| 3378 | 344.1  | 480.15 | 276.2  | 69.81 | 52.53 |
| 3380 | 343.92 | 480.53 | 277.75 | 69.88 | 52.62 |
| 3382 | 343.73 | 480.85 | 279.09 | 69.93 | 52.69 |
| 3384 | 343.55 | 481.18 | 280.42 | 70    | 52.77 |
| 3386 | 343.38 | 481.52 | 281.75 | 70.07 | 52.86 |
| 3388 | 343.16 | 481.9  | 283.29 | 70.12 | 52.94 |
| 3390 | 342.97 | 482.21 | 284.6  | 70.17 | 53.01 |
| 3392 | 342.79 | 482.54 | 285.92 | 70.25 | 53.09 |
| 3394 | 342.64 | 482.87 | 287.26 | 70.33 | 53.2  |
| 3396 | 342.4  | 483.23 | 288.55 | 70.38 | 53.24 |
| 3398 | 342.21 | 483.55 | 290.07 | 70.45 | 53.35 |
| 3400 | 342.01 | 483.84 | 291.36 | 70.49 | 53.4  |
| 3402 | 341.78 | 484.14 | 292.64 | 70.53 | 53.46 |
| 3404 | 341.59 | 484.5  | 294.15 | 70.59 | 53.53 |
| 3406 | 341.41 | 484.8  | 295.44 | 70.66 | 53.6  |
| 3408 | 341.22 | 485.09 | 296.72 | 70.73 | 53.69 |
| 3410 | 341.03 | 485.39 | 298    | 70.79 | 53.76 |
| 3412 | 340.82 | 485.69 | 299.28 | 70.85 | 53.83 |
| 3414 | 340.68 | 486.09 | 300.83 | 70.99 | 53.97 |
| 3416 | 340.47 | 486.36 | 302.08 | 71.01 | 54.02 |
| 3418 | 340.25 | 486.63 | 303.33 | 71.05 | 54.06 |
| 3420 | 340.02 | 486.96 | 304.59 | 71.1  | 54.13 |
| 3422 | 339.83 | 487.26 | 306.07 | 71.17 | 54.21 |
| 3424 | 339.63 | 487.54 | 307.34 | 71.24 | 54.3  |
| 3426 | 339.41 | 487.82 | 308.59 | 71.3  | 54.37 |
| 3428 | 339.25 | 488.19 | 310.09 | 71.38 | 54.47 |
| 3430 | 339.04 | 488.46 | 311.34 | 71.47 | 54.55 |
| 3432 | 338.88 | 488.78 | 312.62 | 71.54 | 54.66 |
| 3434 | 338.65 | 489.02 | 313.82 | 71.56 | 54.7  |
| 3436 | 338.41 | 489.28 | 315.06 | 71.61 | 54.76 |
| 3438 | 338.22 | 489.6  | 316.5  | 71.67 | 54.85 |
| 3440 | 338.03 | 489.87 | 317.74 | 71.73 | 54.92 |
| 3442 | 337.79 | 490.13 | 318.95 | 71.77 | 54.98 |
| 3444 | 337.64 | 490.49 | 320.22 | 71.87 | 55.1  |
| 3446 | 337.43 | 490.75 | 321.65 | 71.92 | 55.16 |
| 3448 | 337.26 | 491.03 | 322.87 | 71.98 | 55.24 |
| 3450 | 337.03 | 491.3  | 324.1  | 72.04 | 55.33 |
| 3452 | 336.86 | 491.65 | 325.54 | 72.12 | 55.44 |

|      |        |        |        |       |       |
|------|--------|--------|--------|-------|-------|
| 3454 | 336.67 | 491.92 | 326.76 | 72.18 | 55.54 |
| 3456 | 336.46 | 492.16 | 327.95 | 72.22 | 55.59 |
| 3458 | 336.27 | 492.44 | 329.16 | 72.28 | 55.68 |
| 3460 | 336.03 | 492.73 | 330.35 | 72.32 | 55.76 |
| 3462 | 335.83 | 493    | 331.76 | 72.36 | 55.85 |
| 3464 | 335.66 | 493.26 | 332.95 | 72.43 | 55.95 |
| 3466 | 335.42 | 493.5  | 334.11 | 72.46 | 56    |
| 3468 | 335.24 | 493.82 | 335.52 | 72.53 | 56.11 |
| 3470 | 335.02 | 494.06 | 336.48 | 72.56 | 56.17 |
| 3472 | 334.84 | 494.34 | 337.87 | 72.63 | 56.29 |
| 3474 | 334.68 | 494.64 | 339.07 | 72.71 | 56.41 |
| 3476 | 334.46 | 494.91 | 340.25 | 72.77 | 56.49 |
| 3478 | 334.22 | 495.17 | 341.56 | 72.78 | 56.53 |
| 3480 | 334.03 | 495.44 | 342.74 | 72.84 | 56.65 |
| 3482 | 333.8  | 495.7  | 343.9  | 72.91 | 56.75 |
| 3484 | 333.64 | 496.02 | 345.24 | 72.98 | 56.84 |
| 3486 | 333.44 | 496.27 | 346.4  | 73.03 | 56.93 |
| 3488 | 333.25 | 496.54 | 347.55 | 73.08 | 57.01 |
| 3490 | 333.08 | 496.82 | 348.72 | 73.14 | 57.11 |
| 3492 | 332.87 | 497.09 | 349.86 | 73.22 | 57.2  |
| 3494 | 332.65 | 497.35 | 350.97 | 73.26 | 57.26 |
| 3496 | 332.44 | 497.59 | 352.26 | 73.31 | 57.33 |
| 3498 | 332.22 | 497.86 | 353.41 | 73.38 | 57.43 |
| 3500 | 332.03 | 498.14 | 354.53 | 73.43 | 57.51 |
| 3502 | 331.86 | 498.4  | 355.85 | 73.51 | 57.62 |
| 3504 | 331.63 | 498.62 | 356.92 | 73.54 | 57.67 |
| 3506 | 331.47 | 498.89 | 358.06 | 73.64 | 57.77 |
| 3508 | 331.25 | 499.18 | 359.18 | 73.71 | 57.87 |
| 3510 | 331.02 | 499.41 | 360.44 | 73.76 | 57.92 |
| 3512 | 330.85 | 499.67 | 361.56 | 73.84 | 58.04 |
| 3514 | 330.63 | 499.89 | 362.63 | 73.89 | 58.11 |
| 3516 | 330.42 | 500.14 | 363.72 | 73.96 | 58.22 |
| 3518 | 330.22 | 500.44 | 365    | 74.04 | 58.32 |
| 3520 | 330    | 500.65 | 366.07 | 74.1  | 58.38 |
| 3522 | 329.83 | 500.93 | 367.2  | 74.24 | 58.55 |
| 3524 | 329.62 | 501.19 | 368.45 | 74.3  | 58.64 |
| 3526 | 329.42 | 501.42 | 369.52 | 74.37 | 58.73 |
| 3528 | 329.25 | 501.68 | 370.61 | 74.47 | 58.87 |
| 3530 | 329.04 | 501.9  | 371.67 | 74.53 | 58.97 |
| 3532 | 328.82 | 502.14 | 372.73 | 74.61 | 59.08 |
| 3534 | 328.64 | 502.43 | 373.99 | 74.72 | 59.19 |
| 3536 | 328.44 | 502.66 | 375.04 | 74.8  | 59.32 |
| 3538 | 328.25 | 502.89 | 376.1  | 74.88 | 59.43 |
| 3540 | 328    | 503.13 | 377.13 | 74.95 | 59.51 |

|      |        |        |        |       |       |
|------|--------|--------|--------|-------|-------|
| 3542 | 327.8  | 503.35 | 378.33 | 75.02 | 59.58 |
| 3544 | 327.64 | 503.61 | 379.4  | 75.14 | 59.76 |
| 3546 | 327.44 | 503.84 | 380.44 | 75.23 | 59.86 |
| 3548 | 327.2  | 504.04 | 381.45 | 75.29 | 59.95 |
| 3550 | 327.01 | 504.32 | 382.66 | 75.38 | 60.06 |
| 3552 | 326.81 | 504.51 | 383.68 | 75.46 | 60.18 |
| 3554 | 326.58 | 504.73 | 384.69 | 75.52 | 60.27 |
| 3556 | 326.39 | 505.02 | 385.76 | 75.64 | 60.41 |
| 3558 | 326.17 | 505.23 | 386.93 | 75.71 | 60.51 |
| 3560 | 326    | 505.47 | 387.97 | 75.84 | 60.67 |
| 3562 | 325.8  | 505.69 | 389    | 75.93 | 60.78 |
| 3564 | 325.57 | 505.94 | 390.18 | 76.01 | 60.88 |
| 3566 | 325.38 | 506.15 | 391.2  | 76.12 | 61    |
| 3568 | 325.18 | 506.36 | 392.21 | 76.2  | 61.14 |
| 3570 | 324.98 | 506.57 | 393.19 | 76.28 | 61.24 |
| 3572 | 324.74 | 506.78 | 394.21 | 76.38 | 61.35 |
| 3574 | 324.56 | 507.03 | 395.38 | 76.47 | 61.49 |
| 3576 | 324.36 | 507.25 | 396.38 | 76.56 | 61.61 |
| 3578 | 324.13 | 507.46 | 397.38 | 76.66 | 61.73 |
| 3580 | 323.94 | 507.72 | 398.37 | 76.74 | 61.84 |
| 3582 | 323.74 | 507.94 | 399.54 | 76.86 | 61.96 |
| 3584 | 323.53 | 508.14 | 400.53 | 76.94 | 62.09 |
| 3586 | 323.31 | 508.36 | 401.52 | 77.05 | 62.22 |
| 3588 | 323.13 | 508.57 | 402.5  | 77.15 | 62.34 |
| 3590 | 322.92 | 508.82 | 403.5  | 77.26 | 62.46 |
| 3592 | 322.72 | 509.03 | 404.64 | 77.37 | 62.59 |
| 3594 | 322.52 | 509.23 | 405.61 | 77.47 | 62.72 |
| 3596 | 322.29 | 509.45 | 406.59 | 77.59 | 62.83 |
| 3598 | 322.08 | 509.68 | 407.7  | 77.67 | 62.92 |
| 3600 | 321.93 | 509.92 | 408.7  | 77.83 | 63.1  |
| 3602 | 321.75 | 510.14 | 409.68 | 77.97 | 63.25 |
| 3604 | 321.54 | 510.38 | 410.68 | 78.1  | 63.39 |
| 3606 | 321.31 | 510.58 | 411.74 | 78.2  | 63.47 |
| 3608 | 321.12 | 510.79 | 412.69 | 78.31 | 63.6  |
| 3610 | 320.94 | 511.01 | 413.65 | 78.46 | 63.75 |
| 3612 | 320.69 | 511.2  | 414.6  | 78.58 | 63.85 |
| 3614 | 320.51 | 511.45 | 415.69 | 78.71 | 63.97 |
| 3616 | 320.31 | 511.65 | 416.64 | 78.88 | 64.12 |
| 3618 | 320.12 | 511.86 | 417.58 | 78.98 | 64.22 |
| 3620 | 319.92 | 512.05 | 418.5  | 79.15 | 64.35 |
| 3622 | 319.7  | 512.29 | 419.43 | 79.29 | 64.47 |
| 3624 | 319.52 | 512.52 | 420.54 | 79.49 | 64.64 |
| 3626 | 319.32 | 512.7  | 421.44 | 79.61 | 64.74 |
| 3628 | 319.11 | 512.91 | 422.36 | 79.76 | 64.88 |

|      |        |        |        |        |       |
|------|--------|--------|--------|--------|-------|
| 3630 | 318.94 | 513.17 | 423.44 | 79.93  | 65.03 |
| 3632 | 318.77 | 513.4  | 424.38 | 80.14  | 65.21 |
| 3634 | 318.53 | 513.56 | 425.24 | 80.25  | 65.3  |
| 3636 | 318.36 | 513.78 | 426.14 | 80.44  | 65.44 |
| 3638 | 318.11 | 513.99 | 427.17 | 80.58  | 65.55 |
| 3640 | 317.97 | 514.23 | 428.11 | 80.83  | 65.75 |
| 3642 | 317.78 | 514.44 | 429.01 | 81.03  | 65.88 |
| 3644 | 317.59 | 514.64 | 429.88 | 81.2   | 66.01 |
| 3646 | 317.34 | 514.84 | 430.77 | 81.4   | 66.12 |
| 3648 | 317.11 | 515.03 | 431.73 | 81.6   | 66.22 |
| 3650 | 316.94 | 515.24 | 432.6  | 81.92  | 66.36 |
| 3652 | 316.76 | 515.46 | 433.48 | 82.27  | 66.48 |
| 3654 | 316.51 | 515.68 | 434.3  | 82.63  | 66.55 |
| 3656 | 316.36 | 515.92 | 435.36 | 83.2   | 66.71 |
| 3658 | 316.16 | 516.1  | 436.2  | 83.71  | 66.83 |
| 3660 | 315.96 | 516.3  | 437.04 | 84.25  | 66.91 |
| 3662 | 315.74 | 516.49 | 437.88 | 84.83  | 66.98 |
| 3664 | 315.54 | 516.69 | 438.83 | 85.58  | 67.09 |
| 3666 | 315.35 | 516.91 | 439.68 | 86.31  | 67.17 |
| 3668 | 315.17 | 517.1  | 440.51 | 87.08  | 67.25 |
| 3670 | 314.98 | 517.3  | 441.33 | 87.88  | 67.3  |
| 3672 | 314.77 | 517.54 | 442.32 | 88.74  | 67.4  |
| 3674 | 314.57 | 517.73 | 443.13 | 89.75  | 67.46 |
| 3676 | 314.41 | 517.96 | 443.98 | 90.72  | 67.57 |
| 3678 | 314.16 | 518.16 | 444.77 | 91.64  | 67.6  |
| 3680 | 313.96 | 518.38 | 445.72 | 92.82  | 67.67 |
| 3682 | 313.78 | 518.59 | 446.55 | 93.84  | 67.77 |
| 3684 | 313.6  | 518.8  | 447.36 | 94.89  | 67.83 |
| 3686 | 313.35 | 518.98 | 448.13 | 95.92  | 67.85 |
| 3688 | 313.15 | 519.2  | 448.92 | 97     | 67.89 |
| 3690 | 312.98 | 519.42 | 449.85 | 98.32  | 67.96 |
| 3692 | 312.81 | 519.64 | 450.68 | 99.46  | 68.02 |
| 3694 | 312.56 | 519.86 | 451.44 | 100.57 | 68.06 |
| 3696 | 312.38 | 520.07 | 452.37 | 101.75 | 68.11 |
| 3698 | 312.22 | 520.33 | 453.21 | 103.17 | 68.22 |
| 3700 | 312    | 520.53 | 453.99 | 104.36 | 68.26 |
| 3702 | 311.82 | 520.78 | 454.78 | 105.59 | 68.32 |
| 3704 | 311.62 | 520.97 | 455.69 | 107.02 | 68.37 |
| 3706 | 311.47 | 521.19 | 456.46 | 108.25 | 68.45 |
| 3708 | 311.26 | 521.38 | 457.23 | 109.5  | 68.48 |
| 3710 | 311.08 | 521.62 | 458.01 | 110.82 | 68.57 |
| 3712 | 310.9  | 521.88 | 458.82 | 112.13 | 68.65 |
| 3714 | 310.73 | 522.09 | 459.73 | 113.66 | 68.73 |
| 3716 | 310.53 | 522.28 | 460.48 | 114.96 | 68.79 |

|      |        |        |        |        |       |
|------|--------|--------|--------|--------|-------|
| 3718 | 310.32 | 522.49 | 461.26 | 116.32 | 68.89 |
| 3720 | 310.13 | 522.71 | 462.14 | 117.87 | 68.94 |
| 3722 | 309.94 | 522.91 | 462.91 | 119.23 | 69.02 |
| 3724 | 309.75 | 523.1  | 463.66 | 120.58 | 69.1  |
| 3726 | 309.54 | 523.29 | 464.4  | 121.97 | 69.17 |
| 3728 | 309.33 | 523.51 | 465.14 | 123.35 | 69.22 |
| 3730 | 309.16 | 523.72 | 466.04 | 125.01 | 69.31 |
| 3732 | 308.98 | 523.91 | 466.78 | 126.43 | 69.41 |
| 3734 | 308.79 | 524.11 | 467.53 | 127.85 | 69.48 |
| 3736 | 308.57 | 524.34 | 468.4  | 129.29 | 69.57 |
| 3738 | 308.38 | 524.53 | 469.13 | 130.98 | 69.64 |
| 3740 | 308.21 | 524.75 | 469.89 | 132.47 | 69.75 |
| 3742 | 308.02 | 524.94 | 470.63 | 133.94 | 69.84 |
| 3744 | 307.82 | 525.18 | 471.38 | 135.42 | 69.92 |
| 3746 | 307.62 | 525.39 | 472.25 | 137.18 | 70.05 |
| 3748 | 307.39 | 525.55 | 472.94 | 138.64 | 70.11 |
| 3750 | 307.19 | 525.76 | 473.67 | 140.15 | 70.21 |
| 3752 | 306.98 | 525.97 | 474.5  | 141.67 | 70.29 |
| 3754 | 306.79 | 526.16 | 475.22 | 143.44 | 70.37 |
| 3756 | 306.61 | 526.36 | 475.94 | 144.97 | 70.48 |
| 3758 | 306.39 | 526.54 | 476.65 | 146.5  | 70.56 |
| 3760 | 306.19 | 526.75 | 477.38 | 148.05 | 70.65 |
| 3762 | 306.02 | 527    | 478.21 | 149.89 | 70.75 |
| 3764 | 305.8  | 527.2  | 478.9  | 151.44 | 70.87 |
| 3766 | 305.61 | 527.42 | 479.62 | 153.02 | 70.96 |
| 3768 | 305.36 | 527.6  | 480.3  | 154.58 | 71.03 |
| 3770 | 305.17 | 527.85 | 481.12 | 156.15 | 71.14 |
| 3772 | 304.98 | 528.07 | 481.84 | 158.01 | 71.27 |
| 3774 | 304.79 | 528.28 | 482.53 | 159.62 | 71.4  |
| 3776 | 304.6  | 528.54 | 483.24 | 161.25 | 71.56 |
| 3778 | 304.37 | 528.7  | 484.02 | 163.08 | 71.66 |
| 3780 | 304.17 | 528.91 | 484.7  | 164.68 | 71.82 |
| 3782 | 303.96 | 529.1  | 485.38 | 166.27 | 71.95 |
| 3784 | 303.73 | 529.33 | 486.05 | 167.89 | 72.08 |
| 3786 | 303.52 | 529.52 | 486.85 | 169.51 | 72.21 |
| 3788 | 303.34 | 529.74 | 487.55 | 171.43 | 72.37 |
| 3790 | 303.12 | 529.91 | 488.2  | 173.04 | 72.48 |
| 3792 | 302.9  | 530.16 | 488.91 | 174.7  | 72.63 |
| 3794 | 302.71 | 530.36 | 489.7  | 176.62 | 72.76 |
| 3796 | 302.46 | 530.52 | 490.31 | 178.2  | 72.86 |
| 3798 | 302.26 | 530.72 | 490.98 | 179.85 | 72.99 |
| 3800 | 302.01 | 530.93 | 491.75 | 181.48 | 73.12 |
| 3802 | 301.8  | 531.14 | 492.3  | 183.11 | 73.26 |
| 3804 | 301.58 | 531.32 | 493.06 | 185.05 | 73.42 |



|      |        |        |        |        |        |
|------|--------|--------|--------|--------|--------|
| 3806 | 301.4  | 531.55 | 493.75 | 186.75 | 73.65  |
| 3808 | 301.12 | 531.74 | 494.38 | 188.38 | 73.8   |
| 3810 | 300.87 | 531.91 | 495.12 | 190    | 73.94  |
| 3812 | 300.66 | 532.13 | 495.78 | 191.95 | 74.14  |
| 3814 | 300.44 | 532.33 | 496.44 | 193.61 | 74.36  |
| 3816 | 300.2  | 532.51 | 497.06 | 195.27 | 74.52  |
| 3818 | 299.94 | 532.73 | 497.8  | 197.2  | 74.72  |
| 3820 | 299.75 | 532.97 | 498.48 | 198.9  | 75.01  |
| 3822 | 299.53 | 533.19 | 499.12 | 200.6  | 75.25  |
| 3824 | 299.31 | 533.39 | 499.76 | 202.25 | 75.49  |
| 3826 | 299.03 | 533.62 | 500.5  | 204.2  | 75.73  |
| 3828 | 298.76 | 533.78 | 501.08 | 205.83 | 75.95  |
| 3830 | 298.52 | 533.98 | 501.69 | 207.51 | 76.27  |
| 3832 | 298.28 | 534.21 | 502.35 | 209.18 | 76.58  |
| 3834 | 298.02 | 534.42 | 503.07 | 210.85 | 76.9   |
| 3836 | 297.81 | 534.64 | 503.71 | 212.79 | 77.29  |
| 3838 | 297.55 | 534.82 | 504.33 | 214.48 | 77.65  |
| 3840 | 297.31 | 535.01 | 504.94 | 216.15 | 78.01  |
| 3842 | 297.08 | 535.28 | 505.58 | 217.87 | 78.45  |
| 3844 | 296.85 | 535.49 | 506.31 | 219.84 | 78.89  |
| 3846 | 296.59 | 535.67 | 506.9  | 221.51 | 79.42  |
| 3848 | 296.3  | 535.85 | 507.51 | 223.16 | 79.9   |
| 3850 | 296.06 | 536.11 | 508.26 | 224.85 | 80.44  |
| 3852 | 295.8  | 536.29 | 508.85 | 226.8  | 80.99  |
| 3854 | 295.57 | 536.48 | 509.44 | 228.49 | 81.67  |
| 3856 | 295.35 | 536.7  | 510.08 | 230.19 | 82.33  |
| 3858 | 295.02 | 536.85 | 510.64 | 231.82 | 82.94  |
| 3860 | 294.78 | 537.11 | 511.37 | 233.81 | 83.77  |
| 3862 | 294.51 | 537.29 | 511.96 | 235.46 | 84.5   |
| 3864 | 294.25 | 537.49 | 512.55 | 237.15 | 85.28  |
| 3866 | 293.97 | 537.72 | 513.16 | 238.84 | 86.09  |
| 3868 | 293.73 | 537.93 | 513.89 | 240.81 | 86.95  |
| 3870 | 293.46 | 538.13 | 514.48 | 242.49 | 87.97  |
| 3872 | 293.14 | 538.31 | 515.05 | 244.16 | 88.87  |
| 3874 | 292.86 | 538.53 | 515.73 | 245.82 | 89.79  |
| 3876 | 292.61 | 538.75 | 516.33 | 247.78 | 90.95  |
| 3878 | 292.36 | 538.97 | 516.94 | 249.49 | 92     |
| 3880 | 292.1  | 539.16 | 517.52 | 251.16 | 93.05  |
| 3882 | 291.8  | 539.37 | 518.13 | 252.84 | 94.13  |
| 3884 | 291.56 | 539.62 | 518.84 | 254.56 | 95.27  |
| 3886 | 291.29 | 539.82 | 519.43 | 256.53 | 96.6   |
| 3888 | 290.97 | 540.02 | 520.01 | 258.22 | 97.77  |
| 3890 | 290.63 | 540.2  | 520.55 | 259.86 | 98.89  |
| 3892 | 290.38 | 540.41 | 521.22 | 261.83 | 100.08 |

|      |        |        |        |        |        |
|------|--------|--------|--------|--------|--------|
| 3894 | 290.09 | 540.61 | 521.81 | 263.52 | 101.49 |
| 3896 | 289.83 | 540.82 | 522.41 | 265.22 | 102.74 |
| 3898 | 289.52 | 541.07 | 523.1  | 266.93 | 104.01 |
| 3900 | 289.23 | 541.25 | 523.66 | 268.85 | 105.23 |
| 3902 | 288.97 | 541.47 | 524.25 | 270.54 | 106.72 |
| 3904 | 288.67 | 541.66 | 524.83 | 272.22 | 107.99 |
| 3906 | 288.38 | 541.86 | 525.42 | 273.9  | 109.29 |
| 3908 | 288.06 | 542.09 | 525.98 | 275.58 | 110.6  |
| 3910 | 287.77 | 542.28 | 526.66 | 277.54 | 112.14 |
| 3912 | 287.48 | 542.48 | 527.24 | 279.21 | 113.46 |
| 3914 | 287.16 | 542.67 | 527.84 | 280.89 | 114.79 |
| 3916 | 286.88 | 542.91 | 528.42 | 282.56 | 116.13 |
| 3918 | 286.58 | 543.08 | 529.09 | 284.51 | 117.69 |
| 3920 | 286.28 | 543.26 | 529.65 | 286.16 | 119.03 |
| 3922 | 285.95 | 543.49 | 530.24 | 287.84 | 120.39 |
| 3924 | 285.66 | 543.67 | 530.91 | 289.48 | 121.72 |
| 3926 | 285.38 | 543.85 | 531.49 | 291.42 | 123.31 |
| 3928 | 285.12 | 544.07 | 532.1  | 293.12 | 124.71 |
| 3930 | 284.8  | 544.24 | 532.65 | 294.75 | 126.05 |
| 3932 | 284.48 | 544.46 | 533.24 | 296.42 | 127.41 |
| 3934 | 284.2  | 544.66 | 533.92 | 298.31 | 128.75 |
| 3936 | 283.88 | 544.82 | 534.47 | 299.93 | 130.3  |
| 3938 | 283.54 | 545.01 | 535.04 | 301.57 | 131.64 |
| 3940 | 283.27 | 545.26 | 535.75 | 303.24 | 133.01 |
| 3942 | 282.95 | 545.41 | 536.29 | 305.09 | 134.3  |
| 3944 | 282.66 | 545.6  | 536.87 | 306.73 | 135.85 |
| 3946 | 282.36 | 545.86 | 537.47 | 308.39 | 137.17 |
| 3948 | 282.07 | 546.04 | 538.14 | 310.26 | 138.48 |
| 3950 | 281.78 | 546.23 | 538.71 | 311.87 | 139.99 |
| 3952 | 281.49 | 546.41 | 539.29 | 313.49 | 141.28 |
| 3954 | 281.19 | 546.57 | 539.84 | 315.06 | 142.54 |
| 3956 | 280.85 | 546.74 | 540.39 | 316.63 | 143.81 |
| 3958 | 280.54 | 546.94 | 541.06 | 318.23 | 145.08 |
| 3960 | 280.24 | 547.12 | 541.64 | 320.07 | 146.56 |
| 3962 | 279.97 | 547.31 | 542.23 | 321.68 | 147.82 |
| 3964 | 279.62 | 547.5  | 542.88 | 323.24 | 149.06 |
| 3966 | 279.28 | 547.61 | 543.4  | 325.01 | 150.44 |
| 3968 | 278.99 | 547.78 | 543.97 | 326.58 | 151.67 |
| 3970 | 278.72 | 547.96 | 544.57 | 328.18 | 152.91 |
| 3972 | 278.36 | 548.14 | 545.13 | 329.71 | 154.09 |
| 3974 | 278.1  | 548.31 | 545.8  | 331.28 | 155.3  |
| 3976 | 277.81 | 548.46 | 546.36 | 333.07 | 156.67 |
| 3978 | 277.48 | 548.56 | 546.88 | 334.56 | 157.78 |
| 3980 | 277.17 | 548.76 | 547.58 | 336.13 | 158.97 |

|      |        |        |        |        |        |
|------|--------|--------|--------|--------|--------|
| 3982 | 276.86 | 548.88 | 548.13 | 337.9  | 160.09 |
| 3984 | 276.59 | 549.01 | 548.7  | 339.43 | 161.43 |
| 3986 | 276.31 | 549.14 | 549.25 | 340.94 | 162.55 |
| 3988 | 275.96 | 549.25 | 549.8  | 342.43 | 163.62 |
| 3990 | 275.65 | 549.38 | 550.43 | 344.16 | 164.89 |
| 3992 | 275.38 | 549.52 | 550.99 | 345.65 | 165.97 |
| 3994 | 275.07 | 549.63 | 551.53 | 347.13 | 167.03 |
| 3996 | 274.75 | 549.78 | 552.08 | 348.61 | 168.09 |
| 3998 | 274.45 | 549.9  | 552.73 | 350.31 | 169.13 |
| 4000 | 274.14 | 549.99 | 553.26 | 351.75 | 170.14 |
| 4002 | 273.86 | 550.11 | 553.82 | 353.2  | 171.33 |
| 4004 | 273.57 | 550.21 | 554.35 | 354.63 | 172.32 |
| 4006 | 273.24 | 550.32 | 554.89 | 356.05 | 173.31 |
| 4008 | 272.94 | 550.41 | 555.53 | 357.71 | 174.43 |
| 4010 | 272.64 | 550.49 | 556.07 | 359.12 | 175.38 |
| 4012 | 272.3  | 550.54 | 556.58 | 360.51 | 176.3  |
| 4014 | 272.02 | 550.65 | 557.13 | 361.94 | 177.24 |
| 4016 | 271.72 | 550.69 | 557.77 | 363.56 | 178.32 |
| 4018 | 271.44 | 550.77 | 558.31 | 364.96 | 179.24 |
| 4020 | 271.1  | 550.83 | 558.83 | 366.33 | 180.14 |
| 4022 | 270.81 | 550.89 | 559.45 | 367.71 | 181.03 |
| 4024 | 270.52 | 550.93 | 559.98 | 369.3  | 182.06 |
| 4026 | 270.24 | 550.98 | 560.53 | 370.69 | 182.97 |
| 4028 | 269.89 | 551.01 | 561.05 | 372.02 | 183.82 |
| 4030 | 269.59 | 551.05 | 561.66 | 373.36 | 184.67 |
| 4032 | 269.3  | 551.08 | 562.19 | 374.93 | 185.69 |
| 4034 | 269.02 | 551.12 | 562.72 | 376.28 | 186.55 |
| 4036 | 268.68 | 551.14 | 563.24 | 377.6  | 187.37 |
| 4038 | 268.39 | 551.16 | 563.86 | 379.14 | 188.18 |
| 4040 | 268.12 | 551.17 | 564.39 | 380.46 | 189.12 |
| 4042 | 267.81 | 551.16 | 564.9  | 381.77 | 189.92 |
| 4044 | 267.53 | 551.2  | 565.47 | 383.11 | 190.76 |
| 4046 | 267.23 | 551.2  | 565.99 | 384.4  | 191.54 |
| 4048 | 266.91 | 551.15 | 566.57 | 385.89 | 192.43 |
| 4050 | 266.6  | 551.13 | 567.08 | 387.16 | 193.21 |
| 4052 | 266.31 | 551.13 | 567.61 | 388.48 | 194    |
| 4054 | 266.01 | 551.09 | 568.13 | 389.76 | 194.77 |
| 4056 | 265.7  | 551.03 | 568.72 | 391.22 | 195.49 |
| 4058 | 265.43 | 551.01 | 569.26 | 392.5  | 196.4  |
| 4060 | 265.17 | 550.98 | 569.79 | 393.76 | 197.15 |
| 4062 | 264.85 | 550.92 | 570.4  | 395.03 | 197.89 |
| 4064 | 264.57 | 550.85 | 570.93 | 396.51 | 198.75 |
| 4066 | 264.29 | 550.78 | 571.44 | 397.75 | 199.49 |
| 4068 | 264    | 550.68 | 571.93 | 398.98 | 200.21 |

|      |        |        |        |        |        |
|------|--------|--------|--------|--------|--------|
| 4070 | 263.72 | 550.61 | 572.48 | 400.27 | 200.96 |
| 4072 | 263.46 | 550.52 | 573.08 | 401.49 | 201.67 |
| 4074 | 263.17 | 550.38 | 573.58 | 402.9  | 202.49 |
| 4076 | 262.83 | 550.25 | 574.07 | 404.13 | 203.17 |
| 4078 | 262.56 | 550.1  | 574.66 | 405.36 | 203.88 |
| 4080 | 262.24 | 549.92 | 575.13 | 406.74 | 204.55 |
| 4082 | 261.99 | 549.77 | 575.66 | 407.96 | 205.37 |
| 4084 | 261.72 | 549.6  | 576.17 | 409.15 | 206.06 |
| 4086 | 261.42 | 549.4  | 576.67 | 410.38 | 206.77 |
| 4088 | 261.17 | 549.21 | 577.26 | 411.78 | 207.45 |
| 4090 | 260.87 | 548.97 | 577.73 | 412.93 | 208.21 |
| 4092 | 260.59 | 548.74 | 578.21 | 414.1  | 208.86 |
| 4094 | 260.27 | 548.44 | 578.69 | 415.27 | 209.51 |
| 4096 | 260.01 | 548.18 | 579.26 | 416.63 | 210.2  |
| 4098 | 259.74 | 547.89 | 579.74 | 417.79 | 210.96 |
| 4100 | 259.47 | 547.59 | 580.22 | 418.93 | 211.61 |
| 4102 | 259.16 | 547.26 | 580.71 | 420.1  | 212.26 |
| 4104 | 258.9  | 546.86 | 581.18 | 421.23 | 212.92 |
| 4106 | 258.62 | 546.49 | 581.72 | 422.55 | 213.56 |
| 4108 | 258.36 | 546.12 | 582.18 | 423.68 | 214.31 |
| 4110 | 258.05 | 545.66 | 582.65 | 424.81 | 214.95 |
| 4112 | 257.77 | 545.24 | 583.18 | 425.93 | 215.59 |
| 4114 | 257.53 | 544.83 | 583.65 | 427.23 | 216.35 |
| 4116 | 257.27 | 544.38 | 584.1  | 428.34 | 216.97 |
| 4118 | 257.02 | 543.95 | 584.58 | 429.47 | 217.6  |
| 4120 | 256.71 | 543.42 | 585.1  | 430.74 | 218.19 |
| 4122 | 256.5  | 542.98 | 585.57 | 431.88 | 218.96 |
| 4124 | 256.28 | 542.52 | 586.02 | 432.98 | 219.58 |
| 4126 | 255.98 | 542    | 586.42 | 434.02 | 220.16 |
| 4128 | 255.67 | 541.4  | 586.9  | 435.1  | 220.75 |
| 4130 | 255.42 | 540.9  | 587.33 | 436.35 | 221.35 |
| 4132 | 255.18 | 540.4  | 587.77 | 437.42 | 222.07 |
| 4134 | 254.89 | 539.81 | 588.2  | 438.49 | 222.66 |
| 4136 | 254.66 | 539.31 | 588.68 | 439.74 | 223.28 |
| 4138 | 254.41 | 538.79 | 589.08 | 440.79 | 223.96 |
| 4140 | 254.22 | 538.3  | 589.52 | 441.89 | 224.59 |
| 4142 | 253.9  | 537.74 | 589.88 | 442.92 | 225.15 |
| 4144 | 253.67 | 537.22 | 590.28 | 443.97 | 225.74 |
| 4146 | 253.47 | 536.66 | 590.75 | 445.23 | 226.45 |
| 4148 | 253.21 | 536.12 | 591.09 | 446.23 | 226.98 |
| 4150 | 252.97 | 535.59 | 591.44 | 447.28 | 227.53 |
| 4152 | 252.7  | 535.05 | 591.8  | 448.3  | 228.09 |
| 4154 | 252.49 | 534.47 | 592.23 | 449.51 | 228.75 |
| 4156 | 252.28 | 533.95 | 592.56 | 450.52 | 229.29 |

|      |        |        |        |        |        |
|------|--------|--------|--------|--------|--------|
| 4158 | 252.05 | 533.45 | 592.9  | 451.54 | 229.85 |
| 4160 | 251.81 | 532.88 | 593.25 | 452.57 | 230.41 |
| 4162 | 251.61 | 532.4  | 593.64 | 453.77 | 230.96 |
| 4164 | 251.41 | 531.91 | 593.97 | 454.79 | 231.61 |
| 4166 | 251.17 | 531.44 | 594.29 | 455.79 | 232.14 |
| 4168 | 250.97 | 530.9  | 594.66 | 456.8  | 232.67 |
| 4170 | 250.78 | 530.43 | 594.97 | 457.96 | 233.19 |
| 4172 | 250.57 | 529.97 | 595.28 | 458.95 | 233.81 |
| 4174 | 250.37 | 529.51 | 595.59 | 459.93 | 234.31 |
| 4176 | 250.16 | 529.09 | 595.91 | 460.95 | 234.82 |
| 4178 | 249.95 | 528.59 | 596.25 | 461.92 | 235.3  |
| 4180 | 249.76 | 528.17 | 596.55 | 463.08 | 235.87 |
| 4182 | 249.56 | 527.75 | 596.85 | 464.07 | 236.33 |
| 4184 | 249.31 | 527.24 | 597.14 | 465.03 | 236.78 |
| 4186 | 249.13 | 526.85 | 597.49 | 466.18 | 237.24 |
| 4188 | 248.95 | 526.47 | 597.81 | 467.18 | 237.82 |
| 4190 | 248.76 | 526.07 | 598.09 | 468.14 | 238.27 |
| 4192 | 248.57 | 525.69 | 598.39 | 469.1  | 238.73 |
| 4194 | 248.35 | 525.26 | 598.68 | 470.07 | 239.19 |
| 4196 | 248.16 | 524.9  | 599.01 | 471.18 | 239.72 |
| 4198 | 247.98 | 524.54 | 599.32 | 472.15 | 240.19 |
| 4200 | 247.76 | 524.17 | 599.59 | 473.08 | 240.6  |
| 4202 | 247.56 | 523.74 | 599.87 | 474.02 | 241.02 |
| 4204 | 247.37 | 523.4  | 600.2  | 475.09 | 241.45 |
| 4206 | 247.19 | 523.07 | 600.47 | 476.03 | 241.94 |
| 4208 | 246.98 | 522.69 | 600.74 | 476.97 | 242.34 |
| 4210 | 246.79 | 522.36 | 601.06 | 478.03 | 242.75 |
| 4212 | 246.6  | 522.02 | 601.32 | 478.95 | 243.22 |
| 4214 | 246.41 | 521.7  | 601.58 | 479.89 | 243.62 |
| 4216 | 246.24 | 521.42 | 601.89 | 480.85 | 244.07 |
| 4218 | 246.03 | 521.01 | 602.17 | 481.76 | 244.44 |
| 4220 | 245.85 | 520.69 | 602.42 | 482.82 | 244.89 |
| 4222 | 245.64 | 520.34 | 602.62 | 483.71 | 245.23 |
| 4224 | 245.5  | 520.05 | 602.89 | 484.66 | 245.65 |
| 4226 | 245.25 | 519.65 | 603.11 | 485.66 | 245.99 |
| 4228 | 245.04 | 519.3  | 603.3  | 486.53 | 246.39 |
| 4230 | 244.89 | 519    | 603.55 | 487.44 | 246.79 |
| 4232 | 244.68 | 518.67 | 603.77 | 488.33 | 247.17 |
| 4234 | 244.51 | 518.3  | 604.04 | 489.36 | 247.55 |
| 4236 | 244.32 | 517.96 | 604.23 | 490.07 | 247.89 |
| 4238 | 244.11 | 517.61 | 604.39 | 491.06 | 248.26 |
| 4240 | 243.93 | 517.27 | 604.62 | 491.97 | 248.67 |
| 4242 | 243.76 | 516.96 | 604.86 | 492.84 | 249.03 |
| 4244 | 243.59 | 516.66 | 605.07 | 493.85 | 249.39 |

|      |        |        |        |        |        |
|------|--------|--------|--------|--------|--------|
| 4246 | 243.39 | 516.32 | 605.24 | 494.69 | 249.77 |
| 4248 | 243.22 | 516.02 | 605.46 | 495.55 | 250.13 |
| 4250 | 243.02 | 515.71 | 605.66 | 496.41 | 250.47 |
| 4252 | 242.84 | 515.32 | 605.87 | 497.39 | 250.83 |
| 4254 | 242.68 | 515.02 | 606.09 | 498.24 | 251.17 |
| 4256 | 242.53 | 514.73 | 606.29 | 499.07 | 251.48 |
| 4258 | 242.31 | 514.34 | 606.46 | 499.88 | 251.78 |
| 4260 | 242.14 | 514.03 | 606.68 | 500.84 | 252.13 |
| 4262 | 242.01 | 513.76 | 606.91 | 501.69 | 252.48 |
| 4264 | 241.78 | 513.41 | 607.07 | 502.48 | 252.76 |
| 4266 | 241.61 | 513.05 | 607.29 | 503.3  | 253.06 |
| 4268 | 241.46 | 512.74 | 607.5  | 504.26 | 253.38 |
| 4270 | 241.3  | 512.44 | 607.7  | 505.1  | 253.73 |
| 4272 | 241.15 | 512.16 | 607.91 | 505.9  | 254.06 |
| 4274 | 240.9  | 511.8  | 608.05 | 506.64 | 254.29 |
| 4276 | 240.73 | 511.44 | 608.27 | 507.43 | 254.59 |
| 4278 | 240.59 | 511.15 | 608.46 | 508.35 | 254.94 |
| 4280 | 240.44 | 510.85 | 608.64 | 509.13 | 255.23 |
| 4282 | 240.25 | 510.48 | 608.83 | 509.9  | 255.48 |
| 4284 | 240.08 | 510.16 | 609.03 | 510.79 | 255.71 |
| 4286 | 239.9  | 509.84 | 609.19 | 511.53 | 255.98 |
| 4288 | 239.73 | 509.53 | 609.38 | 512.27 | 256.22 |
| 4290 | 239.56 | 509.25 | 609.6  | 513.03 | 256.49 |
| 4292 | 239.42 | 508.93 | 609.82 | 513.8  | 256.76 |
| 4294 | 239.2  | 508.6  | 610.01 | 514.61 | 256.99 |
| 4296 | 239.04 | 508.3  | 610.21 | 515.36 | 257.22 |
| 4298 | 238.85 | 508.01 | 610.41 | 516.11 | 257.45 |
| 4300 | 238.7  | 507.68 | 610.66 | 516.84 | 257.68 |
| 4302 | 238.54 | 507.39 | 610.87 | 517.68 | 257.92 |
| 4304 | 238.37 | 507.11 | 611.09 | 518.41 | 258.14 |
| 4306 | 238.25 | 506.83 | 611.35 | 519.17 | 258.39 |
| 4308 | 238.1  | 506.58 | 611.62 | 520    | 258.62 |
| 4310 | 237.96 | 506.32 | 611.85 | 520.69 | 258.86 |
| 4312 | 237.78 | 506.04 | 612.05 | 521.37 | 259.05 |
| 4314 | 237.64 | 505.8  | 612.28 | 522.07 | 259.24 |
| 4316 | 237.48 | 505.52 | 612.5  | 522.76 | 259.42 |
| 4318 | 237.29 | 505.24 | 612.72 | 523.4  | 259.55 |
| 4320 | 237.12 | 504.97 | 612.91 | 524.17 | 259.73 |
| 4322 | 236.97 | 504.74 | 613.15 | 524.86 | 259.93 |
| 4324 | 236.83 | 504.5  | 613.43 | 525.54 | 260.13 |
| 4326 | 236.67 | 504.24 | 613.63 | 526.3  | 260.34 |
| 4328 | 236.53 | 504.01 | 613.85 | 526.93 | 260.55 |
| 4330 | 236.42 | 503.82 | 614.08 | 527.62 | 260.79 |
| 4332 | 236.27 | 503.61 | 614.31 | 528.28 | 261    |

|      |        |        |        |        |        |
|------|--------|--------|--------|--------|--------|
| 4334 | 236.14 | 503.37 | 614.56 | 529.03 | 261.24 |
| 4336 | 236.02 | 503.18 | 614.79 | 529.69 | 261.46 |
| 4338 | 235.86 | 502.96 | 614.98 | 530.3  | 261.62 |
| 4340 | 235.74 | 502.75 | 615.22 | 530.97 | 261.83 |
| 4342 | 235.61 | 502.56 | 615.48 | 531.7  | 262.02 |
| 4344 | 235.48 | 502.37 | 615.71 | 532.31 | 262.24 |
| 4346 | 235.32 | 502.18 | 615.92 | 532.91 | 262.41 |
| 4348 | 235.18 | 501.95 | 616.17 | 533.51 | 262.58 |
| 4350 | 235.05 | 501.78 | 616.38 | 534.25 | 262.78 |
| 4352 | 234.92 | 501.6  | 616.59 | 534.84 | 262.96 |
| 4354 | 234.81 | 501.45 | 616.83 | 535.48 | 263.15 |
| 4356 | 234.71 | 501.29 | 617.06 | 536.09 | 263.34 |
| 4358 | 234.61 | 501.16 | 617.32 | 536.79 | 263.53 |
| 4360 | 234.49 | 501    | 617.53 | 537.36 | 263.7  |
| 4362 | 234.37 | 500.87 | 617.76 | 537.95 | 263.89 |
| 4364 | 234.28 | 500.72 | 617.99 | 538.55 | 264.06 |
| 4366 | 234.19 | 500.6  | 618.26 | 539.12 | 264.22 |
| 4368 | 234.05 | 500.44 | 618.45 | 539.72 | 264.36 |
| 4370 | 233.98 | 500.34 | 618.69 | 540.29 | 264.51 |
| 4372 | 233.9  | 500.24 | 618.92 | 540.85 | 264.66 |
| 4374 | 233.8  | 500.11 | 619.17 | 541.48 | 264.81 |
| 4376 | 233.64 | 499.96 | 619.33 | 541.98 | 264.93 |
| 4378 | 233.59 | 499.88 | 619.59 | 542.53 | 265.13 |
| 4380 | 233.49 | 499.77 | 619.8  | 543.05 | 265.28 |
| 4382 | 233.43 | 499.67 | 620.08 | 543.58 | 265.47 |
| 4384 | 233.34 | 499.57 | 620.3  | 544.17 | 265.66 |
| 4386 | 233.23 | 499.45 | 620.49 | 544.65 | 265.78 |
| 4388 | 233.17 | 499.37 | 620.74 | 545.18 | 265.99 |
| 4390 | 233.12 | 499.29 | 621.03 | 545.69 | 266.16 |
| 4392 | 233.04 | 499.21 | 621.25 | 546.26 | 266.34 |
| 4394 | 232.96 | 499.1  | 621.47 | 546.73 | 266.49 |
| 4396 | 232.91 | 499.04 | 621.71 | 547.23 | 266.65 |
| 4398 | 232.84 | 498.94 | 621.98 | 547.79 | 266.8  |
| 4400 | 232.74 | 498.83 | 622.19 | 548.24 | 266.94 |
| 4402 | 232.7  | 498.76 | 622.45 | 548.71 | 267.12 |
| 4404 | 232.62 | 498.67 | 622.68 | 549.16 | 267.25 |
| 4406 | 232.55 | 498.57 | 622.96 | 549.58 | 267.36 |
| 4408 | 232.52 | 498.5  | 623.23 | 550.14 | 267.52 |
| 4410 | 232.5  | 498.45 | 623.5  | 550.59 | 267.64 |
| 4412 | 232.41 | 498.33 | 623.72 | 550.99 | 267.72 |
| 4414 | 232.35 | 498.23 | 623.96 | 551.41 | 267.83 |
| 4416 | 232.32 | 498.17 | 624.27 | 551.91 | 267.96 |
| 4418 | 232.3  | 498.11 | 624.54 | 552.34 | 268.09 |
| 4420 | 232.24 | 498.03 | 624.78 | 552.74 | 268.18 |

|      |        |        |        |        |        |
|------|--------|--------|--------|--------|--------|
| 4422 | 232.21 | 497.93 | 625.04 | 553.14 | 268.3  |
| 4424 | 232.19 | 497.86 | 625.36 | 553.62 | 268.45 |
| 4426 | 232.18 | 497.81 | 625.64 | 554.02 | 268.58 |
| 4428 | 232.13 | 497.7  | 625.9  | 554.4  | 268.7  |
| 4430 | 232.08 | 497.6  | 626.16 | 554.73 | 268.78 |
| 4432 | 232.03 | 497.5  | 626.4  | 555.16 | 268.86 |
| 4434 | 232.01 | 497.42 | 626.67 | 555.55 | 269.01 |
| 4436 | 232.03 | 497.37 | 626.96 | 555.95 | 269.16 |
| 4438 | 232.02 | 497.28 | 627.22 | 556.31 | 269.29 |
| 4440 | 231.97 | 497.16 | 627.5  | 556.65 | 269.4  |
| 4442 | 231.96 | 497.08 | 627.76 | 557.06 | 269.55 |
| 4444 | 231.92 | 496.96 | 627.98 | 557.36 | 269.64 |
| 4446 | 231.92 | 496.87 | 628.25 | 557.73 | 269.78 |
| 4448 | 231.87 | 496.76 | 628.52 | 558.06 | 269.88 |
| 4450 | 231.87 | 496.68 | 628.77 | 558.46 | 270.04 |
| 4452 | 231.88 | 496.62 | 629.04 | 558.82 | 270.18 |
| 4454 | 231.87 | 496.52 | 629.27 | 559.17 | 270.33 |
| 4456 | 231.89 | 496.44 | 629.57 | 559.57 | 270.48 |
| 4458 | 231.84 | 496.32 | 629.77 | 559.88 | 270.57 |
| 4460 | 231.87 | 496.25 | 630.03 | 560.23 | 270.71 |
| 4462 | 231.83 | 496.15 | 630.24 | 560.55 | 270.83 |
| 4464 | 231.83 | 496.03 | 630.5  | 560.87 | 270.95 |
| 4466 | 231.79 | 495.91 | 630.7  | 561.21 | 271.05 |
| 4468 | 231.79 | 495.83 | 630.93 | 561.52 | 271.15 |
| 4470 | 231.81 | 495.76 | 631.14 | 561.83 | 271.26 |
| 4472 | 231.83 | 495.68 | 631.43 | 562.21 | 271.42 |
| 4474 | 231.82 | 495.59 | 631.64 | 562.51 | 271.55 |
| 4476 | 231.82 | 495.53 | 631.88 | 562.82 | 271.68 |
| 4478 | 231.78 | 495.42 | 632.06 | 563.08 | 271.76 |
| 4480 | 231.79 | 495.33 | 632.26 | 563.39 | 271.86 |
| 4482 | 231.81 | 495.28 | 632.52 | 563.76 | 271.97 |
| 4484 | 231.83 | 495.22 | 632.73 | 564.05 | 272.11 |
| 4486 | 231.82 | 495.12 | 632.91 | 564.29 | 272.19 |
| 4488 | 231.82 | 495.06 | 633.15 | 564.54 | 272.29 |
| 4490 | 231.81 | 494.98 | 633.34 | 564.84 | 272.43 |
| 4492 | 231.83 | 494.94 | 633.55 | 565.09 | 272.56 |
| 4494 | 231.81 | 494.84 | 633.73 | 565.3  | 272.69 |
| 4496 | 231.78 | 494.75 | 633.9  | 565.52 | 272.77 |
| 4498 | 231.79 | 494.7  | 634.09 | 565.76 | 272.92 |
| 4500 | 231.82 | 494.66 | 634.27 | 565.99 | 273.05 |
| 4502 | 231.84 | 494.62 | 634.47 | 566.25 | 273.21 |
| 4504 | 231.87 | 494.59 | 634.66 | 566.49 | 273.36 |
| 4506 | 231.87 | 494.53 | 634.85 | 566.68 | 273.47 |
| 4508 | 231.88 | 494.49 | 635.02 | 566.94 | 273.64 |



|      |        |        |        |        |        |
|------|--------|--------|--------|--------|--------|
| 4510 | 231.89 | 494.45 | 635.18 | 567.13 | 273.78 |
| 4512 | 231.9  | 494.41 | 635.35 | 567.35 | 273.91 |
| 4514 | 231.9  | 494.36 | 635.51 | 567.58 | 274.05 |
| 4516 | 231.9  | 494.3  | 635.64 | 567.76 | 274.16 |
| 4518 | 231.92 | 494.29 | 635.8  | 567.99 | 274.31 |
| 4520 | 231.94 | 494.27 | 635.97 | 568.21 | 274.44 |
| 4522 | 231.96 | 494.25 | 636.14 | 568.42 | 274.54 |
| 4524 | 231.96 | 494.21 | 636.27 | 568.64 | 274.64 |
| 4526 | 231.99 | 494.19 | 636.41 | 568.88 | 274.78 |
| 4528 | 232    | 494.16 | 636.58 | 569.09 | 274.91 |
| 4530 | 232    | 494.13 | 636.7  | 569.34 | 275.02 |
| 4532 | 232.03 | 494.12 | 636.83 | 569.55 | 275.17 |
| 4534 | 232.05 | 494.11 | 636.95 | 569.77 | 275.3  |
| 4536 | 232.09 | 494.09 | 637.09 | 570    | 275.45 |
| 4538 | 232.11 | 494.08 | 637.25 | 570.22 | 275.59 |
| 4540 | 232.14 | 494.04 | 637.36 | 570.51 | 275.76 |
| 4542 | 232.17 | 494.02 | 637.48 | 570.74 | 275.87 |
| 4544 | 232.21 | 494    | 637.62 | 570.97 | 276.02 |
| 4546 | 232.25 | 493.98 | 637.77 | 571.2  | 276.18 |
| 4548 | 232.25 | 493.91 | 637.85 | 571.44 | 276.33 |
| 4550 | 232.29 | 493.88 | 637.97 | 571.67 | 276.49 |
| 4552 | 232.35 | 493.86 | 638.1  | 571.92 | 276.67 |
| 4554 | 232.35 | 493.78 | 638.2  | 572.17 | 276.81 |
| 4556 | 232.42 | 493.76 | 638.31 | 572.42 | 276.98 |
| 4558 | 232.44 | 493.7  | 638.42 | 572.67 | 277.12 |
| 4560 | 232.53 | 493.67 | 638.55 | 572.96 | 277.31 |
| 4562 | 232.58 | 493.63 | 638.67 | 573.23 | 277.47 |
| 4564 | 232.61 | 493.55 | 638.76 | 573.51 | 277.58 |
| 4566 | 232.68 | 493.51 | 638.87 | 573.81 | 277.76 |
| 4568 | 232.75 | 493.45 | 638.97 | 574.07 | 277.89 |
| 4570 | 232.85 | 493.43 | 639.13 | 574.37 | 278.07 |
| 4572 | 232.93 | 493.38 | 639.23 | 574.69 | 278.25 |
| 4574 | 233    | 493.32 | 639.32 | 574.95 | 278.39 |
| 4576 | 233.09 | 493.25 | 639.39 | 575.17 | 278.53 |
| 4578 | 233.16 | 493.18 | 639.47 | 575.41 | 278.67 |
| 4580 | 233.27 | 493.13 | 639.57 | 575.72 | 278.82 |
| 4582 | 233.34 | 493.06 | 639.64 | 575.95 | 278.97 |
| 4584 | 233.44 | 492.98 | 639.69 | 576.16 | 279.07 |
| 4586 | 233.55 | 492.91 | 639.77 | 576.39 | 279.2  |
| 4588 | 233.66 | 492.85 | 639.84 | 576.65 | 279.33 |
| 4590 | 233.73 | 492.75 | 639.86 | 576.82 | 279.43 |
| 4592 | 233.83 | 492.67 | 639.91 | 577.05 | 279.54 |
| 4594 | 234    | 492.62 | 639.99 | 577.29 | 279.67 |
| 4596 | 234.09 | 492.5  | 640.03 | 577.49 | 279.76 |

|      |        |        |        |        |        |
|------|--------|--------|--------|--------|--------|
| 4598 | 234.19 | 492.39 | 640.05 | 577.71 | 279.85 |
| 4600 | 234.28 | 492.29 | 640.08 | 577.92 | 279.93 |
| 4602 | 234.4  | 492.17 | 640.11 | 578.12 | 280.01 |
| 4604 | 234.49 | 492.05 | 640.14 | 578.33 | 280.1  |
| 4606 | 234.59 | 491.95 | 640.17 | 578.58 | 280.21 |
| 4608 | 234.71 | 491.85 | 640.22 | 578.79 | 280.31 |
| 4610 | 234.81 | 491.72 | 640.24 | 579    | 280.41 |
| 4612 | 234.93 | 491.63 | 640.29 | 579.24 | 280.52 |
| 4614 | 235    | 491.51 | 640.3  | 579.44 | 280.63 |
| 4616 | 235.05 | 491.39 | 640.3  | 579.61 | 280.72 |
| 4618 | 235.09 | 491.26 | 640.27 | 579.75 | 280.76 |
| 4620 | 235.12 | 491.11 | 640.25 | 579.91 | 280.82 |
| 4622 | 235.18 | 491.04 | 640.28 | 580.14 | 280.93 |
| 4624 | 235.24 | 490.96 | 640.28 | 580.33 | 281    |
| 4626 | 235.25 | 490.85 | 640.26 | 580.47 | 281.04 |
| 4628 | 235.26 | 490.76 | 640.23 | 580.61 | 281.08 |
| 4630 | 235.23 | 490.65 | 640.19 | 580.7  | 281.1  |
| 4632 | 235.24 | 490.6  | 640.18 | 580.89 | 281.17 |
| 4634 | 235.23 | 490.51 | 640.15 | 581    | 281.21 |
| 4636 | 235.21 | 490.45 | 640.13 | 581.11 | 281.25 |
| 4638 | 235.17 | 490.38 | 640.11 | 581.22 | 281.27 |
| 4640 | 235.11 | 490.3  | 640.07 | 581.28 | 281.31 |
| 4642 | 235.1  | 490.27 | 640.08 | 581.38 | 281.37 |
| 4644 | 235.07 | 490.24 | 640.09 | 581.48 | 281.43 |
| 4646 | 235.01 | 490.2  | 640.08 | 581.53 | 281.47 |
| 4648 | 234.96 | 490.16 | 640.09 | 581.57 | 281.49 |
| 4650 | 234.91 | 490.13 | 640.1  | 581.62 | 281.52 |
| 4652 | 234.88 | 490.12 | 640.15 | 581.68 | 281.56 |
| 4654 | 234.8  | 490.07 | 640.16 | 581.7  | 281.58 |
| 4656 | 234.73 | 490.02 | 640.19 | 581.71 | 281.6  |
| 4658 | 234.67 | 489.99 | 640.25 | 581.73 | 281.63 |
| 4660 | 234.58 | 489.91 | 640.27 | 581.7  | 281.61 |
| 4662 | 234.52 | 489.87 | 640.32 | 581.7  | 281.61 |
| 4664 | 234.46 | 489.8  | 640.39 | 581.69 | 281.6  |
| 4666 | 234.34 | 489.7  | 640.42 | 581.64 | 281.55 |
| 4668 | 234.29 | 489.66 | 640.52 | 581.64 | 281.56 |
| 4670 | 234.16 | 489.5  | 640.56 | 581.56 | 281.51 |
| 4672 | 234.04 | 489.36 | 640.59 | 581.5  | 281.46 |
| 4674 | 233.95 | 489.25 | 640.68 | 581.46 | 281.44 |
| 4676 | 233.84 | 489.12 | 640.74 | 581.4  | 281.42 |
| 4678 | 233.74 | 488.94 | 640.82 | 581.34 | 281.4  |
| 4680 | 233.57 | 488.71 | 640.83 | 581.21 | 281.32 |
| 4682 | 233.43 | 488.48 | 640.86 | 581.09 | 281.24 |
| 4684 | 233.26 | 488.2  | 640.89 | 580.98 | 281.2  |

|      |        |        |        |        |        |
|------|--------|--------|--------|--------|--------|
| 4686 | 233.15 | 488    | 640.97 | 580.89 | 281.16 |
| 4688 | 233.02 | 487.76 | 641.01 | 580.79 | 281.12 |
| 4690 | 232.89 | 487.5  | 641.06 | 580.68 | 281.07 |
| 4692 | 232.72 | 487.22 | 641.09 | 580.56 | 281.02 |
| 4694 | 232.58 | 486.9  | 641.13 | 580.44 | 280.97 |
| 4696 | 232.42 | 486.59 | 641.17 | 580.29 | 280.88 |
| 4698 | 232.24 | 486.25 | 641.18 | 580.12 | 280.77 |
| 4700 | 232.08 | 485.92 | 641.23 | 580    | 280.7  |
| 4702 | 231.91 | 485.55 | 641.3  | 579.87 | 280.64 |
| 4704 | 231.74 | 485.19 | 641.36 | 579.73 | 280.56 |
| 4706 | 231.53 | 484.81 | 641.41 | 579.56 | 280.46 |
| 4708 | 231.35 | 484.44 | 641.49 | 579.41 | 280.4  |
| 4710 | 231.15 | 484.01 | 641.61 | 579.29 | 280.36 |
| 4712 | 230.96 | 483.61 | 641.73 | 579.12 | 280.28 |
| 4714 | 230.76 | 483.2  | 641.86 | 578.97 | 280.18 |
| 4716 | 230.53 | 482.8  | 642.03 | 578.81 | 280.11 |
| 4718 | 230.31 | 482.28 | 642.21 | 578.65 | 280.02 |
| 4720 | 230.12 | 481.85 | 642.4  | 578.46 | 279.95 |
| 4722 | 229.89 | 481.39 | 642.6  | 578.28 | 279.86 |
| 4724 | 229.68 | 480.94 | 642.82 | 578.12 | 279.78 |
| 4726 | 229.43 | 480.4  | 643.06 | 577.96 | 279.7  |
| 4728 | 229.23 | 479.95 | 643.36 | 577.75 | 279.63 |
| 4730 | 229    | 479.45 | 643.61 | 577.58 | 279.55 |
| 4732 | 228.73 | 478.96 | 643.88 | 577.41 | 279.49 |
| 4734 | 228.47 | 478.37 | 644.15 | 577.22 | 279.41 |
| 4736 | 228.21 | 477.85 | 644.44 | 576.98 | 279.34 |
| 4738 | 228    | 477.37 | 644.76 | 576.83 | 279.27 |
| 4740 | 227.75 | 476.89 | 645.06 | 576.67 | 279.2  |
| 4742 | 227.44 | 476.22 | 645.35 | 576.44 | 279.06 |
| 4744 | 227.23 | 475.72 | 645.68 | 576.25 | 278.98 |
| 4746 | 226.98 | 475.21 | 645.98 | 576.08 | 278.89 |
| 4748 | 226.7  | 474.64 | 646.24 | 575.86 | 278.78 |
| 4750 | 226.42 | 474.1  | 646.54 | 575.68 | 278.72 |
| 4752 | 226.22 | 473.52 | 646.93 | 575.54 | 278.71 |
| 4754 | 225.98 | 472.97 | 647.21 | 575.33 | 278.64 |
| 4756 | 225.7  | 472.41 | 647.47 | 575.12 | 278.53 |
| 4758 | 225.44 | 471.81 | 647.78 | 574.97 | 278.49 |
| 4760 | 225.19 | 471.24 | 648.08 | 574.81 | 278.41 |
| 4762 | 224.92 | 470.66 | 648.33 | 574.59 | 278.32 |
| 4764 | 224.66 | 470.1  | 648.58 | 574.42 | 278.26 |
| 4766 | 224.41 | 469.52 | 648.85 | 574.24 | 278.2  |
| 4768 | 224.14 | 468.88 | 649.2  | 574.08 | 278.17 |
| 4770 | 223.88 | 468.28 | 649.46 | 573.89 | 278.07 |
| 4772 | 223.61 | 467.69 | 649.74 | 573.7  | 277.99 |

|      |        |        |        |        |        |
|------|--------|--------|--------|--------|--------|
| 4774 | 223.31 | 467.09 | 650.04 | 573.53 | 277.91 |
| 4776 | 223.02 | 466.37 | 650.37 | 573.32 | 277.79 |
| 4778 | 222.8  | 465.81 | 650.71 | 573.17 | 277.74 |
| 4780 | 222.58 | 465.23 | 651.07 | 573    | 277.67 |
| 4782 | 222.33 | 464.61 | 651.38 | 572.8  | 277.56 |
| 4784 | 222.03 | 463.92 | 651.77 | 572.62 | 277.45 |
| 4786 | 221.76 | 463.31 | 652.1  | 572.38 | 277.34 |
| 4788 | 221.56 | 462.74 | 652.49 | 572.22 | 277.24 |
| 4790 | 221.3  | 462.12 | 652.8  | 572.01 | 277.11 |
| 4792 | 221.01 | 461.52 | 653.14 | 571.81 | 276.99 |
| 4794 | 220.76 | 460.82 | 653.55 | 571.58 | 276.85 |
| 4796 | 220.52 | 460.21 | 653.89 | 571.38 | 276.74 |
| 4798 | 220.28 | 459.61 | 654.22 | 571.17 | 276.61 |
| 4800 | 220    | 458.91 | 654.55 | 570.95 | 276.48 |
| 4802 | 219.76 | 458.29 | 654.91 | 570.7  | 276.36 |
| 4804 | 219.52 | 457.69 | 655.22 | 570.49 | 276.22 |
| 4806 | 219.28 | 457.1  | 655.53 | 570.29 | 276.11 |
| 4808 | 219.03 | 456.48 | 655.82 | 570.07 | 276.02 |
| 4810 | 218.79 | 455.77 | 656.11 | 569.83 | 275.86 |
| 4812 | 218.53 | 455.15 | 656.34 | 569.58 | 275.68 |
| 4814 | 218.27 | 454.51 | 656.55 | 569.36 | 275.5  |
| 4816 | 217.99 | 453.78 | 656.75 | 569.16 | 275.34 |
| 4818 | 217.76 | 453.15 | 656.89 | 568.93 | 275.17 |
| 4820 | 217.52 | 452.53 | 656.99 | 568.75 | 274.99 |
| 4822 | 217.28 | 451.88 | 657.03 | 568.55 | 274.82 |
| 4824 | 217.06 | 451.25 | 657.03 | 568.39 | 274.66 |
| 4826 | 216.78 | 450.5  | 656.99 | 568.22 | 274.49 |
| 4828 | 216.52 | 449.83 | 656.87 | 568.01 | 274.27 |
| 4830 | 216.2  | 449.15 | 656.72 | 567.8  | 274.06 |
| 4832 | 216.04 | 448.55 | 656.65 | 567.7  | 273.96 |
| 4834 | 215.77 | 447.76 | 656.47 | 567.53 | 273.78 |
| 4836 | 215.49 | 447.08 | 656.29 | 567.28 | 273.53 |
| 4838 | 215.27 | 446.41 | 656.14 | 567.11 | 273.36 |
| 4840 | 214.96 | 445.6  | 655.96 | 566.91 | 273.15 |
| 4842 | 214.73 | 444.94 | 655.78 | 566.7  | 272.96 |
| 4844 | 214.48 | 444.24 | 655.58 | 566.51 | 272.73 |
| 4846 | 214.23 | 443.56 | 655.41 | 566.3  | 272.53 |
| 4848 | 213.91 | 442.85 | 655.2  | 566.08 | 272.34 |
| 4850 | 213.66 | 442.04 | 655    | 565.87 | 272.17 |
| 4852 | 213.41 | 441.33 | 654.73 | 565.6  | 272    |
| 4854 | 213.16 | 440.64 | 654.5  | 565.37 | 271.79 |
| 4856 | 212.86 | 439.82 | 654.25 | 565.13 | 271.62 |
| 4858 | 212.6  | 439.13 | 653.94 | 564.87 | 271.44 |
| 4860 | 212.37 | 438.47 | 653.68 | 564.58 | 271.25 |

|      |        |        |        |        |        |
|------|--------|--------|--------|--------|--------|
| 4862 | 212.11 | 437.77 | 653.38 | 564.31 | 271.07 |
| 4864 | 211.88 | 437.1  | 653.12 | 564.06 | 270.92 |
| 4866 | 211.53 | 436.26 | 652.71 | 563.72 | 270.71 |
| 4868 | 211.27 | 435.57 | 652.4  | 563.34 | 270.49 |
| 4870 | 211.01 | 434.88 | 652.07 | 563.03 | 270.31 |
| 4872 | 210.72 | 434.2  | 651.74 | 562.7  | 270.13 |
| 4874 | 210.48 | 433.45 | 651.38 | 562.4  | 269.97 |
| 4876 | 210.23 | 432.78 | 651.02 | 561.99 | 269.74 |
| 4878 | 209.98 | 432.13 | 650.69 | 561.66 | 269.6  |
| 4880 | 209.69 | 431.45 | 650.32 | 561.28 | 269.41 |
| 4882 | 209.37 | 430.78 | 649.94 | 560.89 | 269.2  |
| 4884 | 209.14 | 430.04 | 649.55 | 560.53 | 269.05 |
| 4886 | 208.89 | 429.4  | 649.19 | 560.06 | 268.85 |
| 4888 | 208.59 | 428.74 | 648.81 | 559.66 | 268.67 |
| 4890 | 208.33 | 427.98 | 648.45 | 559.26 | 268.49 |
| 4892 | 208.07 | 427.33 | 648.03 | 558.78 | 268.32 |
| 4894 | 207.78 | 426.67 | 647.64 | 558.33 | 268.11 |
| 4896 | 207.54 | 426.06 | 647.31 | 557.92 | 267.96 |
| 4898 | 207.22 | 425.41 | 646.96 | 557.49 | 267.76 |
| 4900 | 206.93 | 424.63 | 646.59 | 556.95 | 267.56 |
| 4902 | 206.66 | 423.97 | 646.26 | 556.48 | 267.38 |
| 4904 | 206.37 | 423.32 | 645.93 | 556    | 267.21 |
| 4906 | 206.08 | 422.62 | 645.63 | 555.54 | 267.07 |
| 4908 | 205.83 | 422    | 645.2  | 555.05 | 266.92 |
| 4910 | 205.56 | 421.39 | 644.79 | 554.47 | 266.72 |
| 4912 | 205.24 | 420.75 | 644.37 | 553.97 | 266.57 |
| 4914 | 205.01 | 420.07 | 643.84 | 553.47 | 266.46 |
| 4916 | 204.74 | 419.48 | 643.31 | 552.84 | 266.33 |
| 4918 | 204.49 | 418.89 | 642.76 | 552.29 | 266.21 |
| 4920 | 204.21 | 418.32 | 642.15 | 551.72 | 266.08 |
| 4922 | 203.94 | 417.74 | 641.52 | 551.15 | 265.98 |
| 4924 | 203.64 | 417.09 | 640.74 | 550.49 | 265.89 |
| 4926 | 203.37 | 416.54 | 640.03 | 549.91 | 265.79 |
| 4928 | 203.1  | 416.01 | 639.27 | 549.31 | 265.7  |
| 4930 | 202.79 | 415.48 | 638.49 | 548.72 | 265.6  |
| 4932 | 202.54 | 414.91 | 637.53 | 548.12 | 265.53 |
| 4934 | 202.25 | 414.41 | 636.66 | 547.38 | 265.41 |
| 4936 | 202.01 | 413.96 | 635.81 | 546.8  | 265.33 |
| 4938 | 201.64 | 413.4  | 634.86 | 546.14 | 265.2  |
| 4940 | 201.38 | 413.01 | 633.77 | 545.44 | 265.11 |
| 4942 | 201.15 | 412.65 | 632.83 | 544.85 | 265.06 |
| 4944 | 200.85 | 412.28 | 631.8  | 544.19 | 264.94 |
| 4946 | 200.58 | 411.99 | 630.81 | 543.62 | 264.91 |
| 4948 | 200.34 | 411.64 | 629.76 | 543    | 264.86 |

|      |        |        |        |        |        |
|------|--------|--------|--------|--------|--------|
| 4950 | 200.03 | 411.33 | 628.46 | 542.23 | 264.75 |
| 4952 | 199.81 | 411.12 | 627.39 | 541.66 | 264.72 |
| 4954 | 199.52 | 410.88 | 626.26 | 541.03 | 264.68 |
| 4956 | 199.26 | 410.61 | 624.89 | 540.42 | 264.62 |
| 4958 | 198.97 | 410.35 | 623.68 | 539.67 | 264.52 |
| 4960 | 198.72 | 410.16 | 622.49 | 539.08 | 264.51 |
| 4962 | 198.45 | 409.92 | 621.27 | 538.43 | 264.45 |
| 4964 | 198.18 | 409.71 | 619.93 | 537.74 | 264.44 |
| 4966 | 197.92 | 409.48 | 618.78 | 537.24 | 264.42 |
| 4968 | 197.69 | 409.29 | 617.65 | 536.56 | 264.43 |
| 4970 | 197.37 | 409.06 | 616.5  | 535.94 | 264.43 |
| 4972 | 197.12 | 408.8  | 615.21 | 535.35 | 264.49 |
| 4974 | 196.89 | 408.6  | 614.15 | 534.8  | 264.57 |
| 4976 | 196.65 | 408.36 | 613.08 | 534.14 | 264.66 |
| 4978 | 196.4  | 408.11 | 612.03 | 533.6  | 264.75 |
| 4980 | 196.11 | 407.78 | 610.8  | 533.06 | 264.84 |
| 4982 | 195.88 | 407.52 | 609.8  | 532.48 | 264.96 |
| 4984 | 195.64 | 407.22 | 608.81 | 532    | 265.14 |
| 4986 | 195.37 | 406.85 | 607.76 | 531.5  | 265.28 |
| 4988 | 195.12 | 406.52 | 606.8  | 531.07 | 265.5  |
| 4990 | 194.88 | 406.05 | 605.68 | 530.54 | 265.77 |
| 4992 | 194.65 | 405.62 | 604.76 | 530.11 | 265.99 |
| 4994 | 194.42 | 405.14 | 603.87 | 529.71 | 266.35 |
| 4996 | 194.14 | 404.54 | 603    | 529.32 | 266.69 |
| 4998 | 193.91 | 403.99 | 602.02 | 528.88 | 267.05 |
| 5000 | 193.68 | 403.39 | 601.16 | 528.52 | 267.48 |
| 5002 | 193.45 | 402.78 | 600.3  | 528.17 | 267.88 |
| 5004 | 193.17 | 402.14 | 599.38 | 527.82 | 268.26 |
| 5006 | 192.95 | 401.39 | 598.46 | 527.51 | 268.67 |
| 5008 | 192.7  | 400.7  | 597.3  | 527.1  | 269.08 |
| 5010 | 192.49 | 400.02 | 596.34 | 526.79 | 269.46 |
| 5012 | 192.18 | 399.27 | 595.29 | 526.44 | 269.76 |
| 5014 | 192    | 398.47 | 594.07 | 526.17 | 270.07 |
| 5016 | 191.76 | 397.75 | 592.97 | 525.79 | 270.39 |
| 5018 | 191.51 | 396.99 | 591.81 | 525.45 | 270.63 |
| 5020 | 191.31 | 396.29 | 590.68 | 525.16 | 270.93 |
| 5022 | 191.05 | 395.43 | 589.49 | 524.83 | 271.2  |
| 5024 | 190.83 | 394.69 | 588.04 | 524.44 | 271.48 |
| 5026 | 190.62 | 393.93 | 586.72 | 524.1  | 271.79 |
| 5028 | 190.33 | 393.16 | 585.37 | 523.74 | 272.04 |
| 5030 | 190.09 | 392.29 | 583.78 | 523.38 | 272.3  |
| 5032 | 189.88 | 391.54 | 582.41 | 522.97 | 272.59 |
| 5034 | 189.66 | 390.76 | 581.01 | 522.6  | 272.88 |
| 5036 | 189.42 | 389.99 | 579.63 | 522.22 | 273.14 |

|      |        |        |        |        |        |
|------|--------|--------|--------|--------|--------|
| 5038 | 189.14 | 389.08 | 577.99 | 521.81 | 273.39 |
| 5040 | 188.92 | 388.32 | 576.63 | 521.36 | 273.71 |
| 5042 | 188.69 | 387.54 | 575.23 | 520.94 | 273.94 |
| 5044 | 188.43 | 386.76 | 573.82 | 520.49 | 274.15 |
| 5046 | 188.17 | 385.88 | 572.45 | 520.06 | 274.4  |
| 5048 | 187.94 | 385.11 | 570.84 | 519.53 | 274.63 |
| 5050 | 187.7  | 384.34 | 569.47 | 519.05 | 274.87 |
| 5052 | 187.44 | 383.57 | 568.08 | 518.57 | 275.06 |
| 5054 | 187.2  | 382.67 | 566.49 | 518.05 | 275.22 |
| 5056 | 186.95 | 381.88 | 565.1  | 517.4  | 275.36 |
| 5058 | 186.7  | 381.11 | 563.73 | 516.85 | 275.49 |
| 5060 | 186.42 | 380.33 | 562.34 | 516.25 | 275.57 |
| 5062 | 186.2  | 379.47 | 561    | 515.66 | 275.69 |
| 5064 | 185.93 | 378.68 | 559.38 | 514.99 | 275.75 |
| 5066 | 185.72 | 377.95 | 558.05 | 514.25 | 275.83 |
| 5068 | 185.49 | 377.21 | 556.69 | 513.56 | 275.85 |
| 5070 | 185.22 | 376.43 | 555.3  | 512.82 | 275.81 |
| 5072 | 184.96 | 375.54 | 553.72 | 511.96 | 275.74 |
| 5074 | 184.69 | 374.75 | 552.32 | 511.18 | 275.61 |
| 5076 | 184.48 | 374.02 | 550.96 | 510.4  | 275.48 |
| 5078 | 184.21 | 373.28 | 549.59 | 509.56 | 275.29 |
| 5080 | 183.97 | 372.39 | 547.95 | 508.51 | 274.98 |
| 5082 | 183.71 | 371.63 | 546.53 | 507.7  | 274.72 |
| 5084 | 183.47 | 370.89 | 545.11 | 506.53 | 274.34 |
| 5086 | 183.2  | 370.01 | 543.66 | 505.47 | 273.99 |
| 5088 | 182.95 | 369.23 | 542.19 | 504.34 | 273.59 |
| 5090 | 182.72 | 368.49 | 540.47 | 502.98 | 273.13 |
| 5092 | 182.47 | 367.73 | 538.97 | 501.76 | 272.71 |
| 5094 | 182.2  | 367    | 537.49 | 500.54 | 272.33 |
| 5096 | 181.96 | 366.13 | 535.99 | 499.28 | 271.92 |
| 5098 | 181.74 | 365.39 | 534.25 | 497.82 | 271.46 |
| 5100 | 181.5  | 364.64 | 532.75 | 496.52 | 271.07 |
| 5102 | 181.21 | 363.75 | 531.27 | 495.21 | 270.69 |
| 5104 | 180.97 | 363    | 529.52 | 493.87 | 270.29 |
| 5106 | 180.72 | 362.23 | 528.05 | 492.31 | 269.86 |
| 5108 | 180.49 | 361.49 | 526.6  | 490.99 | 269.51 |
| 5110 | 180.19 | 360.59 | 525.15 | 489.64 | 269.16 |
| 5112 | 179.96 | 359.85 | 523.49 | 488.08 | 268.83 |
| 5114 | 179.7  | 359.07 | 522.06 | 486.7  | 268.43 |
| 5116 | 179.47 | 358.3  | 520.64 | 485.35 | 268.11 |
| 5118 | 179.19 | 357.54 | 519.26 | 484.01 | 267.79 |
| 5120 | 178.95 | 356.64 | 517.87 | 482.67 | 267.48 |
| 5122 | 178.71 | 355.88 | 516.27 | 481.1  | 267.17 |
| 5124 | 178.45 | 355.1  | 514.88 | 479.75 | 266.8  |

|      |        |        |        |        |        |
|------|--------|--------|--------|--------|--------|
| 5126 | 178.18 | 354.22 | 513.53 | 478.42 | 266.49 |
| 5128 | 177.92 | 353.56 | 512.16 | 477.07 | 266.15 |
| 5130 | 177.69 | 352.68 | 510.6  | 475.54 | 265.77 |
| 5132 | 177.45 | 351.91 | 509.22 | 474.17 | 265.4  |
| 5134 | 177.2  | 351.15 | 507.86 | 472.83 | 265.05 |
| 5136 | 176.98 | 350.28 | 506.51 | 471.47 | 264.68 |
| 5138 | 176.72 | 349.48 | 504.88 | 469.82 | 264.29 |
| 5140 | 176.49 | 348.73 | 503.5  | 468.44 | 263.85 |
| 5142 | 176.19 | 347.95 | 502.09 | 467.04 | 263.45 |
| 5144 | 175.92 | 347    | 500.42 | 465.58 | 263.04 |
| 5146 | 175.71 | 346.23 | 499.04 | 463.95 | 262.67 |
| 5148 | 175.46 | 345.44 | 497.6  | 462.53 | 262.33 |
| 5150 | 175.19 | 344.63 | 496.15 | 461.09 | 261.97 |
| 5152 | 174.93 | 343.74 | 494.48 | 459.46 | 261.69 |
| 5154 | 174.69 | 342.96 | 493.06 | 458.32 | 261.44 |
| 5156 | 174.43 | 342.16 | 491.6  | 456.7  | 261.2  |
| 5158 | 174.13 | 341.35 | 490.14 | 455.34 | 261.04 |
| 5160 | 173.9  | 340.44 | 488.45 | 454    | 260.96 |
| 5162 | 173.65 | 339.64 | 487    | 452.68 | 260.89 |
| 5164 | 173.42 | 338.85 | 485.54 | 451.17 | 260.84 |
| 5166 | 173.19 | 338.06 | 484.09 | 449.87 | 260.82 |
| 5168 | 172.86 | 337.11 | 482.35 | 448.56 | 260.77 |
| 5170 | 172.63 | 336.32 | 480.87 | 447.08 | 260.81 |
| 5172 | 172.37 | 335.51 | 479.36 | 445.79 | 260.84 |
| 5174 | 172.12 | 334.72 | 477.9  | 444.54 | 260.91 |
| 5176 | 171.83 | 333.91 | 476.41 | 443.27 | 260.96 |
| 5178 | 171.6  | 332.99 | 474.66 | 441.8  | 261.06 |
| 5180 | 171.35 | 332.19 | 473.43 | 440.75 | 261.12 |
| 5182 | 171.07 | 331.39 | 471.69 | 439.29 | 261.22 |
| 5184 | 170.82 | 330.44 | 469.93 | 438.06 | 261.33 |
| 5186 | 170.57 | 329.64 | 468.45 | 436.62 | 261.48 |
| 5188 | 170.33 | 328.85 | 466.96 | 435.4  | 261.69 |
| 5190 | 170.08 | 328.06 | 465.48 | 434.2  | 261.94 |
| 5192 | 169.8  | 327.26 | 464    | 433.02 | 262.25 |
| 5194 | 169.55 | 326.33 | 462.28 | 431.86 | 262.66 |
| 5196 | 169.34 | 325.55 | 460.85 | 430.58 | 263.29 |
| 5198 | 169.07 | 324.73 | 459.35 | 429.46 | 263.89 |
| 5200 | 168.78 | 323.94 | 457.88 | 428.42 | 264.6  |
| 5202 | 168.54 | 322.99 | 456.18 | 427.37 | 265.41 |
| 5204 | 168.34 | 322.24 | 454.77 | 426.23 | 266.47 |
| 5206 | 168.07 | 321.43 | 453.31 | 425.21 | 267.35 |
| 5208 | 167.75 | 320.46 | 451.82 | 424.18 | 268.25 |
| 5210 | 167.52 | 319.68 | 450.17 | 423.07 | 269.2  |
| 5212 | 167.28 | 318.9  | 448.74 | 422.07 | 270.29 |



|      |        |        |        |        |        |
|------|--------|--------|--------|--------|--------|
| 5214 | 167.03 | 318.12 | 447.32 | 421.06 | 271.19 |
| 5216 | 166.72 | 317.31 | 445.88 | 420.01 | 272.04 |
| 5218 | 166.5  | 316.41 | 444.24 | 418.96 | 272.92 |
| 5220 | 166.26 | 315.63 | 442.83 | 417.69 | 273.75 |
| 5222 | 166.04 | 314.88 | 441.42 | 416.6  | 274.62 |
| 5224 | 165.77 | 313.98 | 440.02 | 415.44 | 275.21 |
| 5226 | 165.53 | 313.22 | 438.4  | 414.27 | 275.62 |
| 5228 | 165.28 | 312.44 | 436.99 | 412.84 | 275.8  |
| 5230 | 165.02 | 311.66 | 435.57 | 411.57 | 275.71 |
| 5232 | 164.75 | 310.86 | 434.12 | 410.24 | 275.41 |
| 5234 | 164.46 | 309.95 | 432.48 | 408.68 | 275    |
| 5236 | 164.23 | 309.23 | 431.11 | 407.39 | 274.39 |
| 5238 | 163.97 | 308.48 | 429.72 | 406.01 | 273.76 |
| 5240 | 163.73 | 307.74 | 428.36 | 404.66 | 273.11 |
| 5242 | 163.47 | 306.85 | 426.73 | 403.28 | 272.4  |
| 5244 | 163.22 | 306.12 | 425.37 | 401.65 | 271.56 |
| 5246 | 162.99 | 305.4  | 424    | 400.28 | 270.9  |
| 5248 | 162.73 | 304.57 | 422.68 | 398.95 | 270.31 |
| 5250 | 162.49 | 303.86 | 421.33 | 397.6  | 269.7  |
| 5252 | 162.26 | 303.16 | 419.78 | 396.05 | 269.03 |
| 5254 | 162.02 | 302.47 | 418.45 | 394.73 | 268.47 |
| 5256 | 161.72 | 301.77 | 417.12 | 393.39 | 267.89 |
| 5258 | 161.47 | 300.96 | 415.81 | 392.1  | 267.29 |
| 5260 | 161.24 | 300.28 | 414.27 | 390.57 | 266.71 |
| 5262 | 161    | 299.61 | 412.98 | 389.28 | 266.05 |
| 5264 | 160.77 | 298.97 | 411.69 | 387.99 | 265.51 |
| 5266 | 160.44 | 298.15 | 410.13 | 386.69 | 264.95 |
| 5268 | 160.23 | 297.51 | 408.88 | 385.24 | 264.4  |
| 5270 | 160    | 296.88 | 407.61 | 384    | 263.94 |
| 5272 | 159.75 | 296.2  | 406.32 | 382.74 | 263.49 |
| 5274 | 159.49 | 295.46 | 405.08 | 381.54 | 263.11 |
| 5276 | 159.23 | 294.79 | 403.59 | 380.13 | 262.74 |
| 5278 | 158.96 | 294.09 | 402.3  | 378.96 | 262.35 |
| 5280 | 158.7  | 293.43 | 401.08 | 377.83 | 262.05 |
| 5282 | 158.49 | 292.69 | 399.64 | 376.74 | 261.78 |
| 5284 | 158.23 | 292.02 | 398.38 | 375.42 | 261.45 |
| 5286 | 158.03 | 291.39 | 397.2  | 374.37 | 261.15 |
| 5288 | 157.81 | 290.73 | 395.98 | 373.27 | 260.75 |
| 5290 | 157.48 | 289.91 | 394.71 | 372.11 | 260.28 |
| 5292 | 157.25 | 289.27 | 393.29 | 370.83 | 259.71 |
| 5294 | 157.02 | 288.61 | 392.1  | 369.71 | 259.14 |
| 5296 | 156.75 | 287.95 | 390.89 | 368.58 | 258.47 |
| 5298 | 156.47 | 287.13 | 389.66 | 367.4  | 257.72 |
| 5300 | 156.25 | 286.47 | 388.26 | 366.09 | 256.96 |

|      |        |        |        |        |        |
|------|--------|--------|--------|--------|--------|
| 5302 | 156.04 | 285.81 | 387.07 | 364.94 | 255.99 |
| 5304 | 155.75 | 285.05 | 385.91 | 363.79 | 255.11 |
| 5306 | 155.57 | 284.42 | 384.57 | 362.51 | 254.24 |
| 5308 | 155.3  | 283.72 | 383.35 | 361.33 | 253.1  |
| 5310 | 155.08 | 283.05 | 382.19 | 360.19 | 252.17 |
| 5312 | 154.81 | 282.38 | 381.03 | 359.07 | 251.22 |
| 5314 | 154.61 | 281.64 | 379.91 | 357.98 | 250.28 |
| 5316 | 154.39 | 281    | 378.59 | 356.71 | 249.32 |
| 5318 | 154.15 | 280.33 | 377.45 | 355.61 | 248.2  |
| 5320 | 153.89 | 279.55 | 376.32 | 354.52 | 247.24 |
| 5322 | 153.63 | 278.86 | 374.96 | 353.22 | 246.26 |
| 5324 | 153.37 | 278.17 | 373.83 | 352.13 | 245.16 |
| 5326 | 153.19 | 277.54 | 372.74 | 351.1  | 244.29 |
| 5328 | 152.96 | 276.86 | 371.61 | 350.03 | 243.35 |
| 5330 | 152.7  | 276.23 | 370.52 | 349    | 242.45 |
| 5332 | 152.47 | 275.47 | 369.24 | 347.8  | 241.41 |
| 5334 | 152.25 | 274.81 | 368.15 | 346.77 | 240.53 |
| 5336 | 151.97 | 274.12 | 367.04 | 345.71 | 239.67 |
| 5338 | 151.79 | 273.49 | 365.98 | 344.73 | 238.85 |
| 5340 | 151.52 | 272.7  | 364.7  | 343.54 | 238.01 |
| 5342 | 151.28 | 272.03 | 363.62 | 342.54 | 237.05 |
| 5344 | 151.01 | 271.25 | 362.55 | 341.55 | 236.23 |
| 5346 | 150.78 | 270.58 | 361.3  | 340.55 | 235.41 |
| 5348 | 150.57 | 269.95 | 360.27 | 339.42 | 234.5  |
| 5350 | 150.36 | 269.29 | 359.22 | 338.45 | 233.71 |
| 5352 | 150.14 | 268.63 | 358.16 | 337.49 | 232.92 |
| 5354 | 149.9  | 267.88 | 357.12 | 336.54 | 232.15 |
| 5356 | 149.67 | 267.23 | 355.91 | 335.59 | 231.38 |
| 5358 | 149.44 | 266.56 | 354.87 | 334.46 | 230.44 |
| 5360 | 149.18 | 265.92 | 353.85 | 333.51 | 229.68 |
| 5362 | 148.93 | 265.14 | 352.82 | 332.56 | 228.91 |
| 5364 | 148.73 | 264.5  | 351.64 | 331.47 | 228.17 |
| 5366 | 148.46 | 263.81 | 350.59 | 330.48 | 227.26 |
| 5368 | 148.26 | 263.17 | 349.59 | 329.55 | 226.56 |
| 5370 | 148.04 | 262.56 | 348.63 | 328.67 | 225.91 |
| 5372 | 147.82 | 261.81 | 347.47 | 327.74 | 225.22 |
| 5374 | 147.59 | 261.15 | 346.45 | 326.65 | 224.43 |
| 5376 | 147.34 | 260.47 | 345.43 | 325.7  | 223.76 |
| 5378 | 147.08 | 259.71 | 344.43 | 324.79 | 223.13 |
| 5380 | 146.91 | 259.12 | 343.35 | 323.8  | 222.6  |
| 5382 | 146.7  | 258.47 | 342.38 | 322.89 | 221.95 |
| 5384 | 146.41 | 257.69 | 341.39 | 321.99 | 221.38 |
| 5386 | 146.22 | 257.18 | 340.44 | 321.14 | 220.85 |
| 5388 | 146    | 256.46 | 339.32 | 320.13 | 220.24 |

|      |        |        |        |        |        |
|------|--------|--------|--------|--------|--------|
| 5390 | 145.75 | 255.79 | 338.35 | 319.23 | 219.7  |
| 5392 | 145.51 | 255.17 | 337.41 | 318.38 | 219.22 |
| 5394 | 145.34 | 254.57 | 336.5  | 317.54 | 218.74 |
| 5396 | 145.11 | 253.86 | 335.43 | 316.67 | 218.24 |
| 5398 | 144.93 | 253.23 | 334.5  | 315.7  | 217.67 |
| 5400 | 144.68 | 252.56 | 333.53 | 314.78 | 217.14 |
| 5402 | 144.43 | 251.84 | 332.45 | 313.92 | 216.64 |
| 5404 | 144.24 | 251.25 | 331.55 | 312.9  | 216.1  |
| 5406 | 144.03 | 250.63 | 330.64 | 312.05 | 215.69 |
| 5408 | 143.76 | 249.95 | 329.67 | 311.13 | 215.24 |
| 5410 | 143.55 | 249.26 | 328.64 | 310.15 | 214.9  |
| 5412 | 143.35 | 248.65 | 327.77 | 309.44 | 214.56 |
| 5414 | 143.11 | 248.02 | 326.85 | 308.42 | 214.13 |
| 5416 | 142.82 | 247.37 | 325.89 | 307.51 | 213.67 |
| 5418 | 142.63 | 246.67 | 324.88 | 306.67 | 213.21 |
| 5420 | 142.44 | 246.08 | 324.03 | 305.71 | 212.7  |
| 5422 | 142.2  | 245.45 | 323.12 | 304.84 | 211.99 |
| 5424 | 142.01 | 244.87 | 322.26 | 304.01 | 211.37 |
| 5426 | 141.74 | 244.15 | 321.37 | 303.12 | 210.67 |
| 5428 | 141.53 | 243.55 | 320.36 | 302.28 | 209.97 |
| 5430 | 141.35 | 242.98 | 319.53 | 301.33 | 209.19 |
| 5432 | 141.1  | 242.4  | 318.68 | 300.48 | 208.49 |
| 5434 | 140.9  | 241.71 | 317.83 | 299.64 | 207.8  |
| 5436 | 140.68 | 241.09 | 316.81 | 298.63 | 207.09 |
| 5438 | 140.42 | 240.45 | 315.91 | 297.75 | 206.21 |
| 5440 | 140.24 | 239.93 | 315.13 | 296.99 | 205.56 |
| 5442 | 140    | 239.21 | 314.11 | 296.12 | 204.82 |
| 5444 | 139.84 | 238.68 | 313.33 | 295.34 | 204.16 |
| 5446 | 139.64 | 238.11 | 312.49 | 294.36 | 203.35 |
| 5448 | 139.44 | 237.52 | 311.65 | 293.52 | 202.63 |
| 5450 | 139.17 | 236.83 | 310.82 | 292.69 | 201.93 |
| 5452 | 139.01 | 236.31 | 309.88 | 291.77 | 201.26 |
| 5454 | 138.81 | 235.74 | 309.07 | 290.94 | 200.47 |
| 5456 | 138.51 | 235.1  | 308.19 | 290.04 | 199.69 |
| 5458 | 138.32 | 234.45 | 307.25 | 289.26 | 199    |
| 5460 | 138.13 | 233.89 | 306.43 | 288.32 | 198.3  |
| 5462 | 137.92 | 233.32 | 305.63 | 287.49 | 197.48 |
| 5464 | 137.74 | 232.79 | 304.81 | 286.69 | 196.8  |
| 5466 | 137.48 | 232.2  | 303.97 | 285.86 | 196.09 |
| 5468 | 137.31 | 231.58 | 303.06 | 285.09 | 195.43 |
| 5470 | 137.08 | 230.98 | 302.23 | 284.13 | 194.6  |
| 5472 | 136.83 | 230.4  | 301.41 | 283.29 | 193.91 |
| 5474 | 136.64 | 229.77 | 300.6  | 282.47 | 193.22 |
| 5476 | 136.41 | 229.2  | 299.65 | 281.54 | 192.52 |

|      |        |        |        |        |        |
|------|--------|--------|--------|--------|--------|
| 5478 | 136.23 | 228.65 | 298.88 | 280.76 | 191.75 |
| 5480 | 136.04 | 228.11 | 298.08 | 279.95 | 191.08 |
| 5482 | 135.78 | 227.44 | 297.14 | 279.13 | 190.4  |
| 5484 | 135.56 | 226.87 | 296.34 | 278.17 | 189.61 |
| 5486 | 135.4  | 226.37 | 295.59 | 277.42 | 188.99 |
| 5488 | 135.16 | 225.83 | 294.8  | 276.62 | 188.31 |
| 5490 | 134.98 | 225.25 | 293.98 | 275.8  | 187.63 |
| 5492 | 134.77 | 224.64 | 293.08 | 274.9  | 187.01 |
| 5494 | 134.57 | 224.08 | 292.3  | 274.12 | 186.26 |
| 5496 | 134.39 | 223.54 | 291.52 | 273.32 | 185.6  |
| 5498 | 134.13 | 222.89 | 290.58 | 272.52 | 184.92 |
| 5500 | 133.97 | 222.39 | 289.83 | 271.61 | 184.19 |
| 5502 | 133.77 | 221.85 | 289.06 | 270.82 | 183.55 |
| 5504 | 133.53 | 221.31 | 288.27 | 270.04 | 182.92 |
| 5506 | 133.34 | 220.68 | 287.5  | 269.26 | 182.29 |
| 5508 | 133.15 | 220.14 | 286.59 | 268.48 | 181.67 |
| 5510 | 132.94 | 219.59 | 285.81 | 267.55 | 180.94 |
| 5512 | 132.7  | 219.05 | 285.06 | 266.78 | 180.34 |
| 5514 | 132.52 | 218.44 | 284.17 | 266.01 | 179.73 |
| 5516 | 132.36 | 217.95 | 283.45 | 265.16 | 179.06 |
| 5518 | 132.15 | 217.43 | 282.67 | 264.38 | 178.44 |
| 5520 | 131.98 | 216.92 | 281.92 | 263.62 | 177.83 |
| 5522 | 131.73 | 216.27 | 281.14 | 262.83 | 177.2  |
| 5524 | 131.56 | 215.77 | 280.3  | 261.99 | 176.56 |
| 5526 | 131.39 | 215.25 | 279.54 | 261.25 | 175.96 |
| 5528 | 131.14 | 214.72 | 278.78 | 260.5  | 175.37 |
| 5530 | 130.94 | 214.09 | 277.89 | 259.71 | 174.75 |
| 5532 | 130.78 | 213.59 | 277.16 | 258.87 | 174.19 |
| 5534 | 130.61 | 213.09 | 276.45 | 258.14 | 173.54 |
| 5536 | 130.42 | 212.57 | 275.72 | 257.39 | 172.97 |
| 5538 | 130.15 | 211.93 | 274.83 | 256.63 | 172.36 |
| 5540 | 130    | 211.44 | 274.11 | 255.79 | 171.72 |
| 5542 | 129.79 | 210.91 | 273.37 | 255.05 | 171.16 |
| 5544 | 129.61 | 210.42 | 272.64 | 254.34 | 170.6  |
| 5546 | 129.4  | 209.82 | 271.91 | 253.61 | 170.05 |
| 5548 | 129.2  | 209.31 | 271.06 | 252.75 | 169.39 |
| 5550 | 129.01 | 208.81 | 270.34 | 252.04 | 168.84 |
| 5552 | 128.82 | 208.31 | 269.61 | 251.32 | 168.29 |
| 5554 | 128.62 | 207.81 | 268.9  | 250.63 | 167.74 |
| 5556 | 128.43 | 207.23 | 268.06 | 249.93 | 167.19 |
| 5558 | 128.24 | 206.72 | 267.35 | 249.09 | 166.56 |
| 5560 | 128.02 | 206.23 | 266.64 | 248.39 | 166.02 |
| 5562 | 127.84 | 205.64 | 265.93 | 247.69 | 165.48 |
| 5564 | 127.64 | 205.1  | 265.08 | 246.85 | 164.92 |

|      |        |        |        |        |        |
|------|--------|--------|--------|--------|--------|
| 5566 | 127.46 | 204.63 | 264.41 | 246.18 | 164.32 |
| 5568 | 127.26 | 204.12 | 263.7  | 245.48 | 163.8  |
| 5570 | 127.07 | 203.56 | 262.91 | 244.8  | 163.3  |
| 5572 | 126.88 | 203.06 | 262.21 | 244    | 162.69 |
| 5574 | 126.71 | 202.57 | 261.54 | 243.33 | 162.17 |
| 5576 | 126.49 | 202.06 | 260.83 | 242.62 | 161.6  |
| 5578 | 126.29 | 201.51 | 260.17 | 241.98 | 161.12 |
| 5580 | 126.12 | 201.02 | 259.38 | 241.29 | 160.6  |
| 5582 | 125.96 | 200.55 | 258.73 | 240.55 | 160.02 |
| 5584 | 125.73 | 200.05 | 258.03 | 239.88 | 159.5  |
| 5586 | 125.56 | 199.49 | 257.29 | 239.24 | 159.02 |
| 5588 | 125.36 | 198.97 | 256.62 | 238.46 | 158.42 |
| 5590 | 125.2  | 198.5  | 255.99 | 237.84 | 157.94 |
| 5592 | 125.01 | 198.02 | 255.34 | 237.18 | 157.43 |
| 5594 | 124.8  | 197.48 | 254.73 | 236.56 | 156.95 |
| 5596 | 124.58 | 196.97 | 253.97 | 235.78 | 156.34 |
| 5598 | 124.41 | 196.51 | 253.35 | 235.16 | 155.88 |
| 5600 | 124.21 | 196.04 | 252.73 | 234.53 | 155.4  |
| 5602 | 124.03 | 195.5  | 252.12 | 233.92 | 154.91 |
| 5604 | 123.86 | 195.04 | 251.44 | 233.2  | 154.45 |
| 5606 | 123.69 | 194.57 | 250.84 | 232.59 | 153.89 |
| 5608 | 123.52 | 194.11 | 250.24 | 231.98 | 153.41 |
| 5610 | 123.3  | 193.55 | 249.63 | 231.34 | 152.92 |
| 5612 | 123.14 | 193.11 | 248.96 | 230.67 | 152.46 |
| 5614 | 122.97 | 192.65 | 248.38 | 230.06 | 151.92 |
| 5616 | 122.76 | 192.19 | 247.8  | 229.47 | 151.45 |
| 5618 | 122.59 | 191.66 | 247.13 | 228.88 | 150.98 |
| 5620 | 122.36 | 191.15 | 246.49 | 228.14 | 150.4  |
| 5622 | 122.22 | 190.74 | 245.95 | 227.59 | 150    |
| 5624 | 122.06 | 190.31 | 245.4  | 227.02 | 149.54 |
| 5626 | 121.85 | 189.86 | 244.83 | 226.43 | 149.08 |
| 5628 | 121.68 | 189.33 | 244.16 | 225.76 | 148.56 |
| 5630 | 121.49 | 188.87 | 243.56 | 225.17 | 148.1  |
| 5632 | 121.29 | 188.41 | 242.98 | 224.58 | 147.65 |
| 5634 | 121.11 | 187.9  | 242.43 | 224.01 | 147.22 |
| 5636 | 120.93 | 187.45 | 241.74 | 223.33 | 146.76 |
| 5638 | 120.79 | 187.04 | 241.2  | 222.8  | 146.29 |
| 5640 | 120.62 | 186.59 | 240.62 | 222.22 | 145.83 |
| 5642 | 120.4  | 186.08 | 239.95 | 221.66 | 145.4  |
| 5644 | 120.26 | 185.66 | 239.49 | 221.13 | 145.01 |
| 5646 | 120.07 | 185.19 | 238.79 | 220.44 | 144.49 |
| 5648 | 119.89 | 184.74 | 238.22 | 219.87 | 144.06 |
| 5650 | 119.72 | 184.27 | 237.67 | 219.33 | 143.66 |
| 5652 | 119.55 | 183.85 | 237    | 218.76 | 143.24 |

|      |        |        |        |        |        |
|------|--------|--------|--------|--------|--------|
| 5654 | 119.38 | 183.42 | 236.43 | 218.11 | 142.73 |
| 5656 | 119.18 | 182.99 | 235.86 | 217.54 | 142.32 |
| 5658 | 119    | 182.5  | 235.19 | 216.99 | 141.9  |
| 5660 | 118.8  | 182.03 | 234.57 | 216.3  | 141.45 |
| 5662 | 118.66 | 181.64 | 234.04 | 215.78 | 140.98 |
| 5664 | 118.5  | 181.24 | 233.47 | 215.23 | 140.57 |
| 5666 | 118.32 | 180.74 | 232.9  | 214.67 | 140.16 |
| 5668 | 118.13 | 180.3  | 232.23 | 214.02 | 139.68 |
| 5670 | 117.98 | 179.89 | 231.65 | 213.47 | 139.29 |
| 5672 | 117.78 | 179.45 | 231.05 | 212.92 | 138.88 |
| 5674 | 117.58 | 178.98 | 230.38 | 212.37 | 138.49 |
| 5676 | 117.42 | 178.56 | 229.8  | 211.72 | 138.03 |
| 5678 | 117.3  | 178.19 | 229.27 | 211.21 | 137.65 |
| 5680 | 117.14 | 177.78 | 228.7  | 210.67 | 137.25 |
| 5682 | 116.94 | 177.3  | 228.11 | 210.11 | 136.84 |
| 5684 | 116.76 | 176.89 | 227.45 | 209.48 | 136.45 |
| 5686 | 116.61 | 176.5  | 226.99 | 209.04 | 136.07 |
| 5688 | 116.41 | 176.08 | 226.32 | 208.4  | 135.58 |
| 5690 | 116.25 | 175.61 | 225.66 | 207.88 | 135.19 |
| 5692 | 116.06 | 175.18 | 225.06 | 207.22 | 134.73 |
| 5694 | 115.93 | 174.81 | 224.52 | 206.7  | 134.36 |
| 5696 | 115.75 | 174.38 | 223.93 | 206.14 | 133.95 |
| 5698 | 115.58 | 174    | 223.38 | 205.62 | 133.59 |
| 5700 | 115.42 | 173.55 | 222.73 | 205    | 133.15 |
| 5702 | 115.22 | 173.1  | 222.14 | 204.42 | 132.73 |
| 5704 | 115.03 | 172.69 | 221.58 | 203.88 | 132.35 |
| 5706 | 114.91 | 172.27 | 221.04 | 203.39 | 131.99 |
| 5708 | 114.76 | 171.87 | 220.39 | 202.77 | 131.61 |
| 5710 | 114.6  | 171.48 | 219.84 | 202.24 | 131.19 |
| 5712 | 114.45 | 171.09 | 219.28 | 201.71 | 130.82 |
| 5714 | 114.25 | 170.62 | 218.6  | 201.14 | 130.43 |
| 5716 | 114.1  | 170.24 | 218.06 | 200.54 | 130.01 |
| 5718 | 113.94 | 169.85 | 217.51 | 200.01 | 129.63 |
| 5720 | 113.76 | 169.43 | 216.94 | 199.42 | 129.22 |
| 5722 | 113.58 | 168.99 | 216.39 | 198.89 | 128.86 |
| 5724 | 113.43 | 168.61 | 215.75 | 198.38 | 128.52 |
| 5726 | 113.26 | 168.2  | 215.17 | 197.75 | 128.08 |
| 5728 | 113.09 | 167.83 | 214.63 | 197.24 | 127.73 |
| 5730 | 112.93 | 167.38 | 213.98 | 196.71 | 127.36 |
| 5732 | 112.79 | 167.01 | 213.45 | 196.13 | 127.02 |
| 5734 | 112.64 | 166.62 | 212.9  | 195.62 | 126.61 |
| 5736 | 112.49 | 166.23 | 212.33 | 195.08 | 126.23 |
| 5738 | 112.3  | 165.85 | 211.79 | 194.59 | 125.87 |
| 5740 | 112.11 | 165.36 | 211.11 | 193.95 | 125.44 |

|      |        |        |        |        |        |
|------|--------|--------|--------|--------|--------|
| 5742 | 112.01 | 165.03 | 210.61 | 193.49 | 125.13 |
| 5744 | 111.83 | 164.65 | 210.07 | 193    | 124.79 |
| 5746 | 111.66 | 164.19 | 209.52 | 192.48 | 124.4  |
| 5748 | 111.49 | 163.82 | 208.89 | 191.89 | 124.05 |
| 5750 | 111.37 | 163.48 | 208.4  | 191.41 | 123.68 |
| 5752 | 111.19 | 163.1  | 207.87 | 190.91 | 123.34 |
| 5754 | 111.02 | 162.72 | 207.32 | 190.41 | 123    |
| 5756 | 110.89 | 162.3  | 206.71 | 189.85 | 122.61 |
| 5758 | 110.75 | 161.94 | 206.19 | 189.37 | 122.29 |
| 5760 | 110.59 | 161.56 | 205.66 | 188.88 | 121.96 |
| 5762 | 110.42 | 161.13 | 205.14 | 188.4  | 121.63 |
| 5764 | 110.27 | 160.76 | 204.52 | 187.92 | 121.3  |
| 5766 | 110.11 | 160.38 | 203.99 | 187.35 | 120.92 |
| 5768 | 109.93 | 160.02 | 203.47 | 186.86 | 120.59 |
| 5770 | 109.77 | 159.56 | 202.85 | 186.37 | 120.25 |
| 5772 | 109.62 | 159.2  | 202.33 | 185.81 | 119.92 |
| 5774 | 109.48 | 158.85 | 201.84 | 185.34 | 119.55 |
| 5776 | 109.35 | 158.51 | 201.34 | 184.87 | 119.24 |
| 5778 | 109.16 | 158.13 | 200.8  | 184.35 | 118.9  |
| 5780 | 109.02 | 157.72 | 200.22 | 183.9  | 118.59 |
| 5782 | 108.87 | 157.36 | 199.71 | 183.35 | 118.23 |
| 5784 | 108.72 | 157    | 199.19 | 182.89 | 117.91 |
| 5786 | 108.54 | 156.56 | 198.66 | 182.39 | 117.57 |
| 5788 | 108.41 | 156.22 | 198.09 | 181.86 | 117.29 |
| 5790 | 108.22 | 155.84 | 197.57 | 181.37 | 116.9  |
| 5792 | 108.11 | 155.51 | 197.07 | 180.9  | 116.58 |
| 5794 | 107.96 | 155.17 | 196.59 | 180.46 | 116.3  |
| 5796 | 107.81 | 154.77 | 196.09 | 180.01 | 116.01 |
| 5798 | 107.63 | 154.37 | 195.47 | 179.4  | 115.6  |
| 5800 | 107.5  | 154.04 | 195    | 178.96 | 115.32 |
| 5802 | 107.36 | 153.65 | 194.52 | 178.51 | 115.01 |
| 5804 | 107.17 | 153.26 | 193.92 | 177.93 | 114.68 |
| 5806 | 107.06 | 152.94 | 193.46 | 177.49 | 114.34 |
| 5808 | 106.88 | 152.57 | 192.95 | 177.01 | 114.02 |
| 5810 | 106.72 | 152.16 | 192.36 | 176.52 | 113.69 |
| 5812 | 106.61 | 151.84 | 191.91 | 176.02 | 113.37 |
| 5814 | 106.47 | 151.51 | 191.44 | 175.56 | 113.06 |
| 5816 | 106.32 | 151.16 | 190.95 | 175.09 | 112.74 |
| 5818 | 106.16 | 150.82 | 190.48 | 174.63 | 112.45 |
| 5820 | 105.99 | 150.41 | 189.88 | 174.15 | 112.13 |
| 5822 | 105.85 | 150.06 | 189.41 | 173.61 | 111.76 |
| 5824 | 105.67 | 149.71 | 188.91 | 173.14 | 111.45 |
| 5826 | 105.55 | 149.33 | 188.46 | 172.69 | 111.18 |
| 5828 | 105.43 | 149.01 | 187.93 | 172.17 | 110.9  |

|      |        |        |        |        |        |
|------|--------|--------|--------|--------|--------|
| 5830 | 105.28 | 148.66 | 187.44 | 171.68 | 110.53 |
| 5832 | 105.15 | 148.34 | 186.98 | 171.24 | 110.25 |
| 5834 | 104.99 | 147.96 | 186.45 | 170.72 | 109.97 |
| 5836 | 104.84 | 147.63 | 185.98 | 170.25 | 109.64 |
| 5838 | 104.71 | 147.3  | 185.49 | 169.79 | 109.35 |
| 5840 | 104.54 | 146.97 | 185.01 | 169.33 | 109.05 |
| 5842 | 104.36 | 146.54 | 184.5  | 168.83 | 108.72 |
| 5844 | 104.2  | 146.2  | 183.94 | 168.36 | 108.42 |
| 5846 | 104.08 | 145.87 | 183.49 | 167.83 | 108.09 |
| 5848 | 103.93 | 145.54 | 183.03 | 167.38 | 107.8  |
| 5850 | 103.82 | 145.19 | 182.53 | 166.97 | 107.54 |
| 5852 | 103.71 | 144.89 | 182.1  | 166.49 | 107.3  |
| 5854 | 103.53 | 144.54 | 181.6  | 165.99 | 106.94 |
| 5856 | 103.39 | 144.23 | 181.15 | 165.55 | 106.66 |
| 5858 | 103.26 | 143.85 | 180.63 | 165.11 | 106.39 |
| 5860 | 103.14 | 143.55 | 180.19 | 164.62 | 106.08 |
| 5862 | 102.99 | 143.22 | 179.72 | 164.14 | 105.77 |
| 5864 | 102.84 | 142.88 | 179.26 | 163.69 | 105.49 |
| 5866 | 102.71 | 142.6  | 178.85 | 163.29 | 105.25 |
| 5868 | 102.57 | 142.21 | 178.31 | 162.76 | 104.91 |
| 5870 | 102.43 | 141.91 | 177.86 | 162.33 | 104.63 |
| 5872 | 102.28 | 141.6  | 177.43 | 161.91 | 104.37 |
| 5874 | 102.15 | 141.23 | 176.99 | 161.47 | 104.1  |
| 5876 | 102.01 | 140.9  | 176.46 | 160.95 | 103.82 |
| 5878 | 101.84 | 140.54 | 175.98 | 160.48 | 103.44 |
| 5880 | 101.68 | 140.18 | 175.54 | 160.06 | 103.19 |
| 5882 | 101.56 | 139.89 | 175.05 | 159.66 | 102.94 |
| 5884 | 101.43 | 139.6  | 174.64 | 159.16 | 102.63 |
| 5886 | 101.29 | 139.27 | 174.17 | 158.7  | 102.32 |
| 5888 | 101.14 | 138.97 | 173.73 | 158.27 | 102.05 |
| 5890 | 100.96 | 138.59 | 173.27 | 157.81 | 101.76 |
| 5892 | 100.84 | 138.34 | 172.84 | 157.38 | 101.5  |
| 5894 | 100.73 | 138    | 172.35 | 156.91 | 101.22 |
| 5896 | 100.56 | 137.68 | 171.89 | 156.46 | 100.93 |
| 5898 | 100.42 | 137.3  | 171.38 | 156.05 | 100.67 |
| 5900 | 100.32 | 137.02 | 170.96 | 155.56 | 100.43 |
| 5902 | 100.16 | 136.72 | 170.52 | 155.15 | 100.13 |
| 5904 | 100.04 | 136.41 | 170.09 | 154.74 | 99.86  |
| 5906 | 99.89  | 136.08 | 169.67 | 154.33 | 99.6   |
| 5908 | 99.77  | 135.78 | 169.18 | 153.87 | 99.33  |
| 5910 | 99.64  | 135.47 | 168.75 | 153.43 | 99.07  |
| 5912 | 99.5   | 135.18 | 168.35 | 153.03 | 98.82  |
| 5914 | 99.38  | 134.85 | 167.86 | 152.63 | 98.59  |
| 5916 | 99.24  | 134.55 | 167.44 | 152.15 | 98.3   |



|      |       |        |        |        |       |
|------|-------|--------|--------|--------|-------|
| 5918 | 99.11 | 134.25 | 167.02 | 151.73 | 98.05 |
| 5920 | 98.94 | 133.92 | 166.57 | 151.29 | 97.77 |
| 5922 | 98.8  | 133.65 | 166.18 | 150.91 | 97.55 |
| 5924 | 98.69 | 133.31 | 165.68 | 150.5  | 97.27 |
| 5926 | 98.56 | 133.03 | 165.27 | 150.05 | 96.99 |
| 5928 | 98.44 | 132.76 | 164.88 | 149.67 | 96.75 |
| 5930 | 98.34 | 132.46 | 164.43 | 149.28 | 96.52 |
| 5932 | 98.22 | 132.17 | 164.03 | 148.85 | 96.24 |
| 5934 | 98.1  | 131.87 | 163.62 | 148.45 | 96.01 |
| 5936 | 97.95 | 131.56 | 163.2  | 148.02 | 95.74 |
| 5938 | 97.77 | 131.25 | 162.77 | 147.61 | 95.48 |
| 5940 | 97.67 | 130.96 | 162.32 | 147.19 | 95.22 |
| 5942 | 97.54 | 130.65 | 161.91 | 146.79 | 94.96 |
| 5944 | 97.38 | 130.35 | 161.47 | 146.37 | 94.69 |
| 5946 | 97.26 | 130.06 | 161.11 | 146.01 | 94.49 |
| 5948 | 97.12 | 129.76 | 160.64 | 145.54 | 94.25 |
| 5950 | 97    | 129.48 | 160.25 | 145.16 | 93.99 |
| 5952 | 96.9  | 129.22 | 159.87 | 144.81 | 93.77 |
| 5954 | 96.78 | 128.91 | 159.42 | 144.46 | 93.58 |
| 5956 | 96.62 | 128.61 | 158.99 | 143.98 | 93.27 |
| 5958 | 96.5  | 128.34 | 158.6  | 143.61 | 93.04 |
| 5960 | 96.41 | 128.09 | 158.25 | 143.26 | 92.85 |
| 5962 | 96.27 | 127.81 | 157.84 | 142.88 | 92.61 |
| 5964 | 96.16 | 127.52 | 157.41 | 142.55 | 92.41 |
| 5966 | 95.99 | 127.2  | 156.97 | 142.06 | 92.09 |
| 5968 | 95.85 | 126.92 | 156.58 | 141.68 | 91.86 |
| 5970 | 95.78 | 126.67 | 156.25 | 141.37 | 91.69 |
| 5972 | 95.67 | 126.42 | 155.82 | 140.94 | 91.48 |
| 5974 | 95.5  | 126.1  | 155.41 | 140.52 | 91.18 |
| 5976 | 95.34 | 125.81 | 155.01 | 140.12 | 90.94 |
| 5978 | 95.24 | 125.53 | 154.65 | 139.78 | 90.74 |
| 5980 | 95.16 | 125.29 | 154.24 | 139.4  | 90.53 |
| 5982 | 95    | 124.99 | 153.84 | 139.04 | 90.27 |
| 5984 | 94.9  | 124.75 | 153.47 | 138.69 | 90.05 |
| 5986 | 94.76 | 124.42 | 153.02 | 138.31 | 89.81 |
| 5988 | 94.62 | 124.13 | 152.62 | 137.89 | 89.55 |
| 5990 | 94.48 | 123.85 | 152.23 | 137.52 | 89.31 |
| 5992 | 94.37 | 123.59 | 151.87 | 137.16 | 89.12 |
| 5994 | 94.22 | 123.33 | 151.49 | 136.8  | 88.88 |
| 5996 | 94.12 | 123.04 | 151.06 | 136.46 | 88.69 |
| 5998 | 93.99 | 122.77 | 150.69 | 136.04 | 88.42 |
| 6000 | 93.84 | 122.5  | 150.32 | 135.68 | 88.19 |
| 6002 | 93.74 | 122.23 | 149.92 | 135.34 | 88.01 |
| 6004 | 93.59 | 121.94 | 149.54 | 134.91 | 87.79 |

|      |       |        |        |        |       |
|------|-------|--------|--------|--------|-------|
| 6006 | 93.51 | 121.72 | 149.19 | 134.6  | 87.56 |
| 6008 | 93.38 | 121.45 | 148.81 | 134.23 | 87.34 |
| 6010 | 93.24 | 121.18 | 148.44 | 133.88 | 87.13 |
| 6012 | 93.09 | 120.86 | 147.99 | 133.46 | 86.87 |
| 6014 | 93.03 | 120.65 | 147.68 | 133.18 | 86.71 |
| 6016 | 92.88 | 120.38 | 147.3  | 132.81 | 86.47 |
| 6018 | 92.8  | 120.14 | 147.02 | 132.53 | 86.32 |
| 6020 | 92.65 | 119.85 | 146.55 | 132.08 | 86.07 |
| 6022 | 92.56 | 119.62 | 146.22 | 131.77 | 85.86 |
| 6024 | 92.42 | 119.38 | 145.87 | 131.45 | 85.67 |
| 6026 | 92.33 | 119.11 | 145.47 | 131.13 | 85.48 |
| 6028 | 92.16 | 118.81 | 145.06 | 130.7  | 85.21 |
| 6030 | 92.08 | 118.6  | 144.76 | 130.4  | 85.05 |
| 6032 | 91.95 | 118.36 | 144.42 | 130.06 | 84.84 |
| 6034 | 91.82 | 118.11 | 144.07 | 129.74 | 84.64 |
| 6036 | 91.67 | 117.78 | 143.62 | 129.37 | 84.39 |
| 6038 | 91.6  | 117.57 | 143.3  | 129.02 | 84.19 |
| 6040 | 91.46 | 117.32 | 142.97 | 128.69 | 84.01 |
| 6042 | 91.37 | 117.07 | 142.6  | 128.38 | 83.82 |
| 6044 | 91.28 | 116.84 | 142.28 | 128.06 | 83.65 |
| 6046 | 91.12 | 116.54 | 141.89 | 127.68 | 83.37 |
| 6048 | 90.99 | 116.29 | 141.52 | 127.33 | 83.17 |
| 6050 | 90.89 | 116.09 | 141.2  | 127.04 | 83    |
| 6052 | 90.79 | 115.81 | 140.81 | 126.68 | 82.78 |
| 6054 | 90.66 | 115.58 | 140.48 | 126.36 | 82.58 |
| 6056 | 90.52 | 115.31 | 140.12 | 126.02 | 82.37 |
| 6058 | 90.43 | 115.08 | 139.82 | 125.75 | 82.23 |
| 6060 | 90.32 | 114.85 | 139.45 | 125.38 | 82.05 |
| 6062 | 90.21 | 114.61 | 139.13 | 125.08 | 81.82 |
| 6064 | 90.1  | 114.38 | 138.81 | 124.77 | 81.64 |
| 6066 | 89.99 | 114.13 | 138.44 | 124.46 | 81.47 |
| 6068 | 89.88 | 113.89 | 138.1  | 124.1  | 81.25 |
| 6070 | 89.77 | 113.65 | 137.77 | 123.79 | 81.08 |
| 6072 | 89.67 | 113.42 | 137.44 | 123.48 | 80.88 |
| 6074 | 89.52 | 113.13 | 137.09 | 123.15 | 80.67 |
| 6076 | 89.46 | 112.97 | 136.79 | 122.88 | 80.54 |
| 6078 | 89.38 | 112.77 | 136.5  | 122.59 | 80.38 |
| 6080 | 89.22 | 112.51 | 136.15 | 122.26 | 80.15 |
| 6082 | 89.1  | 112.24 | 135.82 | 121.96 | 79.97 |
| 6084 | 88.97 | 111.99 | 135.41 | 121.57 | 79.76 |
| 6086 | 88.86 | 111.77 | 135.09 | 121.27 | 79.55 |
| 6088 | 88.77 | 111.56 | 134.78 | 120.98 | 79.39 |
| 6090 | 88.66 | 111.31 | 134.44 | 120.71 | 79.22 |
| 6092 | 88.52 | 111.05 | 134.09 | 120.34 | 78.99 |

|      |       |        |        |        |       |
|------|-------|--------|--------|--------|-------|
| 6094 | 88.41 | 110.83 | 133.77 | 120.02 | 78.79 |
| 6096 | 88.26 | 110.6  | 133.47 | 119.74 | 78.6  |
| 6098 | 88.17 | 110.35 | 133.12 | 119.45 | 78.44 |
| 6100 | 88.09 | 110.15 | 132.83 | 119.15 | 78.27 |
| 6102 | 88    | 109.95 | 132.53 | 118.88 | 78.11 |
| 6104 | 87.92 | 109.74 | 132.23 | 118.6  | 77.94 |
| 6106 | 87.72 | 109.42 | 131.85 | 118.25 | 77.71 |
| 6108 | 87.64 | 109.23 | 131.53 | 117.93 | 77.54 |
| 6110 | 87.56 | 109.03 | 131.25 | 117.66 | 77.39 |
| 6112 | 87.41 | 108.8  | 130.94 | 117.35 | 77.2  |
| 6114 | 87.32 | 108.54 | 130.62 | 117.06 | 77.04 |
| 6116 | 87.22 | 108.34 | 130.29 | 116.75 | 76.88 |
| 6118 | 87.13 | 108.15 | 130.01 | 116.49 | 76.69 |
| 6120 | 87.06 | 107.96 | 129.73 | 116.24 | 76.56 |
| 6122 | 86.92 | 107.7  | 129.36 | 115.94 | 76.38 |
| 6124 | 86.79 | 107.47 | 129.04 | 115.6  | 76.16 |
| 6126 | 86.68 | 107.25 | 128.73 | 115.31 | 75.99 |
| 6128 | 86.59 | 107.05 | 128.44 | 115.03 | 75.81 |
| 6130 | 86.47 | 106.82 | 128.16 | 114.78 | 75.66 |
| 6132 | 86.32 | 106.56 | 127.78 | 114.41 | 75.46 |
| 6134 | 86.25 | 106.38 | 127.52 | 114.16 | 75.27 |
| 6136 | 86.12 | 106.17 | 127.24 | 113.89 | 75.11 |
| 6138 | 86.02 | 105.93 | 126.9  | 113.63 | 74.96 |
| 6140 | 85.93 | 105.74 | 126.62 | 113.31 | 74.81 |
| 6142 | 85.8  | 105.49 | 126.3  | 113.01 | 74.59 |
| 6144 | 85.68 | 105.27 | 125.99 | 112.73 | 74.41 |
| 6146 | 85.57 | 105.03 | 125.72 | 112.47 | 74.26 |
| 6148 | 85.49 | 104.85 | 125.41 | 112.19 | 74.1  |
| 6150 | 85.38 | 104.63 | 125.13 | 111.94 | 73.93 |
| 6152 | 85.31 | 104.47 | 124.88 | 111.7  | 73.8  |
| 6154 | 85.22 | 104.24 | 124.59 | 111.45 | 73.65 |
| 6156 | 85.12 | 104.04 | 124.25 | 111.14 | 73.49 |
| 6158 | 85    | 103.83 | 123.96 | 110.86 | 73.29 |
| 6160 | 84.9  | 103.64 | 123.69 | 110.61 | 73.14 |
| 6162 | 84.81 | 103.44 | 123.44 | 110.37 | 73    |
| 6164 | 84.7  | 103.24 | 123.1  | 110.06 | 72.84 |
| 6166 | 84.61 | 103.04 | 122.83 | 109.79 | 72.67 |
| 6168 | 84.47 | 102.83 | 122.54 | 109.52 | 72.51 |
| 6170 | 84.38 | 102.6  | 122.22 | 109.28 | 72.37 |
| 6172 | 84.26 | 102.38 | 121.93 | 108.96 | 72.17 |
| 6174 | 84.18 | 102.2  | 121.67 | 108.72 | 72.04 |
| 6176 | 84.07 | 101.99 | 121.4  | 108.46 | 71.89 |
| 6178 | 83.98 | 101.82 | 121.14 | 108.23 | 71.75 |
| 6180 | 83.85 | 101.57 | 120.8  | 107.9  | 71.53 |

|      |       |        |        |        |       |
|------|-------|--------|--------|--------|-------|
| 6182 | 83.76 | 101.37 | 120.53 | 107.65 | 71.38 |
| 6184 | 83.66 | 101.2  | 120.29 | 107.43 | 71.25 |
| 6186 | 83.59 | 101    | 120.05 | 107.21 | 71.13 |
| 6188 | 83.46 | 100.79 | 119.72 | 106.9  | 70.96 |
| 6190 | 83.39 | 100.62 | 119.47 | 106.67 | 70.8  |
| 6192 | 83.26 | 100.4  | 119.18 | 106.4  | 70.67 |
| 6194 | 83.17 | 100.21 | 118.89 | 106.18 | 70.52 |
| 6196 | 83.11 | 100.05 | 118.66 | 105.92 | 70.38 |
| 6198 | 82.99 | 99.85  | 118.38 | 105.66 | 70.23 |
| 6200 | 82.9  | 99.64  | 118.11 | 105.42 | 70.06 |
| 6202 | 82.79 | 99.44  | 117.86 | 105.18 | 69.94 |
| 6204 | 82.69 | 99.24  | 117.54 | 104.92 | 69.78 |
| 6206 | 82.59 | 99.04  | 117.29 | 104.64 | 69.61 |
| 6208 | 82.46 | 98.85  | 117.02 | 104.39 | 69.45 |
| 6210 | 82.42 | 98.7   | 116.77 | 104.2  | 69.36 |
| 6212 | 82.31 | 98.5   | 116.49 | 103.89 | 69.19 |
| 6214 | 82.19 | 98.29  | 116.23 | 103.64 | 69.01 |
| 6216 | 82.09 | 98.1   | 115.97 | 103.41 | 68.87 |
| 6218 | 82.02 | 97.96  | 115.76 | 103.22 | 68.77 |
| 6220 | 81.91 | 97.74  | 115.44 | 102.96 | 68.6  |
| 6222 | 81.82 | 97.55  | 115.19 | 102.69 | 68.45 |
| 6224 | 81.7  | 97.36  | 114.93 | 102.46 | 68.31 |
| 6226 | 81.62 | 97.16  | 114.64 | 102.24 | 68.18 |
| 6228 | 81.53 | 96.98  | 114.39 | 101.97 | 68.06 |
| 6230 | 81.46 | 96.82  | 114.17 | 101.75 | 67.91 |
| 6232 | 81.37 | 96.65  | 113.93 | 101.53 | 67.77 |
| 6234 | 81.24 | 96.45  | 113.66 | 101.28 | 67.61 |
| 6236 | 81.13 | 96.22  | 113.36 | 101.03 | 67.47 |
| 6238 | 81.03 | 96.03  | 113.11 | 100.76 | 67.3  |
| 6240 | 80.94 | 95.86  | 112.86 | 100.53 | 67.17 |
| 6242 | 80.82 | 95.65  | 112.62 | 100.31 | 67.04 |
| 6244 | 80.74 | 95.49  | 112.36 | 100.05 | 66.92 |
| 6246 | 80.64 | 95.3   | 112.1  | 99.82  | 66.75 |
| 6248 | 80.54 | 95.15  | 111.88 | 99.62  | 66.64 |
| 6250 | 80.45 | 94.94  | 111.59 | 99.39  | 66.5  |
| 6252 | 80.34 | 94.75  | 111.34 | 99.12  | 66.37 |
| 6254 | 80.28 | 94.59  | 111.12 | 98.92  | 66.23 |
| 6256 | 80.19 | 94.42  | 110.89 | 98.71  | 66.1  |
| 6258 | 80.07 | 94.21  | 110.6  | 98.47  | 65.97 |
| 6260 | 79.94 | 94.01  | 110.33 | 98.2   | 65.8  |
| 6262 | 79.89 | 93.86  | 110.13 | 98.01  | 65.7  |
| 6264 | 79.8  | 93.71  | 109.9  | 97.79  | 65.57 |
| 6266 | 79.69 | 93.5   | 109.65 | 97.56  | 65.42 |
| 6268 | 79.59 | 93.34  | 109.38 | 97.31  | 65.31 |

|      |       |       |        |       |       |
|------|-------|-------|--------|-------|-------|
| 6270 | 79.51 | 93.18 | 109.16 | 97.11 | 65.15 |
| 6272 | 79.43 | 93.02 | 108.93 | 96.9  | 65.03 |
| 6274 | 79.34 | 92.82 | 108.66 | 96.69 | 64.91 |
| 6276 | 79.25 | 92.65 | 108.44 | 96.45 | 64.78 |
| 6278 | 79.17 | 92.49 | 108.2  | 96.23 | 64.64 |
| 6280 | 79.07 | 92.33 | 107.97 | 96.02 | 64.51 |
| 6282 | 78.98 | 92.13 | 107.72 | 95.81 | 64.39 |
| 6284 | 78.86 | 91.96 | 107.49 | 95.55 | 64.25 |
| 6286 | 78.76 | 91.78 | 107.26 | 95.34 | 64.12 |
| 6288 | 78.7  | 91.63 | 107.05 | 95.14 | 64.01 |
| 6290 | 78.56 | 91.42 | 106.76 | 94.92 | 63.87 |
| 6292 | 78.49 | 91.26 | 106.53 | 94.66 | 63.73 |
| 6294 | 78.36 | 91.07 | 106.28 | 94.43 | 63.56 |
| 6296 | 78.31 | 90.93 | 106.08 | 94.24 | 63.45 |
| 6298 | 78.23 | 90.8  | 105.89 | 94.08 | 63.38 |
| 6300 | 78.18 | 90.65 | 105.67 | 93.89 | 63.27 |
| 6302 | 78.06 | 90.45 | 105.41 | 93.66 | 63.14 |
| 6304 | 77.93 | 90.28 | 105.17 | 93.44 | 62.99 |
| 6306 | 77.86 | 90.1  | 104.93 | 93.26 | 62.88 |
| 6308 | 77.79 | 89.95 | 104.72 | 93.02 | 62.77 |
| 6310 | 77.69 | 89.78 | 104.48 | 92.82 | 62.63 |
| 6312 | 77.61 | 89.63 | 104.27 | 92.6  | 62.52 |
| 6314 | 77.47 | 89.44 | 104.03 | 92.37 | 62.37 |
| 6316 | 77.41 | 89.27 | 103.79 | 92.16 | 62.25 |
| 6318 | 77.32 | 89.13 | 103.58 | 91.96 | 62.15 |
| 6320 | 77.25 | 88.96 | 103.37 | 91.77 | 62.03 |
| 6322 | 77.11 | 88.77 | 103.12 | 91.53 | 61.88 |
| 6324 | 77.05 | 88.62 | 102.91 | 91.37 | 61.78 |
| 6326 | 77    | 88.48 | 102.71 | 91.17 | 61.67 |
| 6328 | 76.88 | 88.32 | 102.5  | 90.96 | 61.55 |
| 6330 | 76.76 | 88.09 | 102.24 | 90.73 | 61.4  |
| 6332 | 76.69 | 87.95 | 102    | 90.53 | 61.3  |
| 6334 | 76.59 | 87.79 | 101.79 | 90.31 | 61.15 |
| 6336 | 76.52 | 87.65 | 101.59 | 90.13 | 61.06 |
| 6338 | 76.41 | 87.46 | 101.32 | 89.94 | 60.95 |
| 6340 | 76.32 | 87.29 | 101.1  | 89.68 | 60.8  |
| 6342 | 76.24 | 87.16 | 100.91 | 89.51 | 60.69 |
| 6344 | 76.16 | 87.01 | 100.7  | 89.32 | 60.58 |
| 6346 | 76.09 | 86.85 | 100.52 | 89.16 | 60.49 |
| 6348 | 76.05 | 86.73 | 100.33 | 89.02 | 60.41 |
| 6350 | 75.97 | 86.59 | 100.12 | 88.79 | 60.28 |
| 6352 | 75.81 | 86.39 | 99.87  | 88.56 | 60.14 |
| 6354 | 75.74 | 86.22 | 99.65  | 88.38 | 60.04 |
| 6356 | 75.69 | 86.11 | 99.48  | 88.2  | 59.96 |

|      |       |       |       |       |       |
|------|-------|-------|-------|-------|-------|
| 6358 | 75.58 | 85.95 | 99.25 | 87.99 | 59.84 |
| 6360 | 75.5  | 85.79 | 99.06 | 87.8  | 59.72 |
| 6362 | 75.38 | 85.59 | 98.79 | 87.59 | 59.57 |
| 6364 | 75.31 | 85.46 | 98.6  | 87.4  | 59.47 |
| 6366 | 75.2  | 85.3  | 98.39 | 87.18 | 59.33 |
| 6368 | 75.13 | 85.16 | 98.2  | 87.02 | 59.22 |
| 6370 | 75.06 | 85.01 | 98    | 86.85 | 59.13 |
| 6372 | 74.97 | 84.86 | 97.8  | 86.65 | 59.01 |
| 6374 | 74.94 | 84.76 | 97.65 | 86.51 | 58.95 |
| 6376 | 74.81 | 84.57 | 97.4  | 86.29 | 58.8  |
| 6378 | 74.7  | 84.39 | 97.19 | 86.09 | 58.68 |
| 6380 | 74.62 | 84.25 | 96.97 | 85.91 | 58.57 |
| 6382 | 74.54 | 84.11 | 96.78 | 85.7  | 58.45 |
| 6384 | 74.46 | 83.96 | 96.58 | 85.53 | 58.37 |
| 6386 | 74.4  | 83.82 | 96.39 | 85.37 | 58.28 |
| 6388 | 74.3  | 83.66 | 96.15 | 85.18 | 58.14 |
| 6390 | 74.21 | 83.53 | 95.96 | 84.98 | 58.03 |
| 6392 | 74.12 | 83.38 | 95.77 | 84.81 | 57.93 |
| 6394 | 74.04 | 83.21 | 95.58 | 84.63 | 57.83 |
| 6396 | 73.97 | 83.08 | 95.37 | 84.43 | 57.73 |
| 6398 | 73.92 | 82.98 | 95.23 | 84.29 | 57.65 |
| 6400 | 73.84 | 82.86 | 95.05 | 84.14 | 57.55 |
| 6402 | 73.75 | 82.69 | 94.82 | 83.93 | 57.43 |
| 6404 | 73.67 | 82.53 | 94.62 | 83.74 | 57.33 |
| 6406 | 73.6  | 82.41 | 94.44 | 83.6  | 57.24 |
| 6408 | 73.5  | 82.24 | 94.23 | 83.39 | 57.11 |
| 6410 | 73.38 | 82.09 | 94.03 | 83.21 | 57.01 |
| 6412 | 73.35 | 81.97 | 93.85 | 83.04 | 56.92 |
| 6414 | 73.27 | 81.84 | 93.68 | 82.89 | 56.84 |
| 6416 | 73.21 | 81.72 | 93.52 | 82.74 | 56.75 |
| 6418 | 73.12 | 81.56 | 93.32 | 82.56 | 56.65 |
| 6420 | 73.06 | 81.44 | 93.13 | 82.41 | 56.56 |
| 6422 | 72.96 | 81.28 | 92.92 | 82.19 | 56.41 |
| 6424 | 72.85 | 81.13 | 92.74 | 82.02 | 56.32 |
| 6426 | 72.77 | 80.98 | 92.54 | 81.84 | 56.2  |
| 6428 | 72.69 | 80.84 | 92.33 | 81.68 | 56.11 |
| 6430 | 72.63 | 80.72 | 92.16 | 81.5  | 56.01 |
| 6432 | 72.55 | 80.6  | 92    | 81.34 | 55.93 |
| 6434 | 72.45 | 80.42 | 91.8  | 81.17 | 55.81 |
| 6436 | 72.41 | 80.31 | 91.61 | 81    | 55.72 |
| 6438 | 72.3  | 80.15 | 91.41 | 80.82 | 55.6  |
| 6440 | 72.26 | 80.06 | 91.27 | 80.68 | 55.54 |
| 6442 | 72.18 | 79.91 | 91.07 | 80.52 | 55.44 |
| 6444 | 72.14 | 79.81 | 90.91 | 80.36 | 55.36 |

|      |       |       |       |       |       |
|------|-------|-------|-------|-------|-------|
| 6446 | 72.05 | 79.67 | 90.73 | 80.2  | 55.25 |
| 6448 | 71.94 | 79.5  | 90.54 | 80.02 | 55.15 |
| 6450 | 71.85 | 79.37 | 90.35 | 79.84 | 55.03 |
| 6452 | 71.76 | 79.22 | 90.14 | 79.64 | 54.91 |
| 6454 | 71.7  | 79.1  | 89.98 | 79.49 | 54.84 |
| 6456 | 71.64 | 78.98 | 89.81 | 79.34 | 54.76 |
| 6458 | 71.54 | 78.84 | 89.65 | 79.2  | 54.67 |
| 6460 | 71.47 | 78.7  | 89.44 | 79.01 | 54.56 |
| 6462 | 71.37 | 78.55 | 89.24 | 78.83 | 54.44 |
| 6464 | 71.31 | 78.43 | 89.08 | 78.68 | 54.35 |
| 6466 | 71.21 | 78.27 | 88.91 | 78.53 | 54.27 |
| 6468 | 71.16 | 78.17 | 88.74 | 78.36 | 54.18 |
| 6470 | 71.1  | 78.06 | 88.58 | 78.23 | 54.11 |
| 6472 | 71.05 | 77.95 | 88.43 | 78.09 | 54.03 |
| 6474 | 70.97 | 77.81 | 88.25 | 77.93 | 53.94 |
| 6476 | 70.91 | 77.7  | 88.1  | 77.79 | 53.87 |
| 6478 | 70.82 | 77.57 | 87.9  | 77.6  | 53.76 |
| 6480 | 70.72 | 77.42 | 87.71 | 77.44 | 53.66 |
| 6482 | 70.63 | 77.27 | 87.51 | 77.27 | 53.54 |
| 6484 | 70.54 | 77.13 | 87.32 | 77.08 | 53.42 |
| 6486 | 70.46 | 77    | 87.16 | 76.94 | 53.35 |
| 6488 | 70.41 | 76.9  | 87.01 | 76.81 | 53.27 |
| 6490 | 70.36 | 76.79 | 86.86 | 76.68 | 53.2  |
| 6492 | 70.27 | 76.65 | 86.68 | 76.54 | 53.11 |
| 6494 | 70.18 | 76.51 | 86.48 | 76.34 | 52.99 |
| 6496 | 70.1  | 76.4  | 86.32 | 76.2  | 52.92 |
| 6498 | 70.05 | 76.28 | 86.18 | 76.07 | 52.84 |
| 6500 | 69.97 | 76.15 | 85.98 | 75.9  | 52.74 |
| 6502 | 69.87 | 76.01 | 85.8  | 75.71 | 52.63 |
| 6504 | 69.8  | 75.89 | 85.64 | 75.56 | 52.54 |
| 6506 | 69.72 | 75.75 | 85.48 | 75.41 | 52.46 |
| 6508 | 69.65 | 75.63 | 85.3  | 75.25 | 52.37 |
| 6510 | 69.6  | 75.54 | 85.16 | 75.12 | 52.28 |
| 6512 | 69.52 | 75.4  | 84.99 | 74.97 | 52.2  |
| 6514 | 69.49 | 75.31 | 84.86 | 74.87 | 52.16 |
| 6516 | 69.38 | 75.15 | 84.66 | 74.67 | 52.05 |
| 6518 | 69.31 | 75.03 | 84.49 | 74.53 | 51.95 |
| 6520 | 69.25 | 74.93 | 84.36 | 74.41 | 51.88 |
| 6522 | 69.19 | 74.83 | 84.21 | 74.3  | 51.82 |
| 6524 | 69.08 | 74.68 | 84    | 74.09 | 51.69 |
| 6526 | 69    | 74.55 | 83.84 | 73.93 | 51.61 |
| 6528 | 68.95 | 74.44 | 83.69 | 73.79 | 51.54 |
| 6530 | 68.85 | 74.3  | 83.53 | 73.65 | 51.45 |
| 6532 | 68.79 | 74.19 | 83.36 | 73.49 | 51.36 |

|      |       |       |       |       |       |
|------|-------|-------|-------|-------|-------|
| 6534 | 68.72 | 74.08 | 83.22 | 73.36 | 51.29 |
| 6536 | 68.65 | 73.98 | 83.08 | 73.23 | 51.22 |
| 6538 | 68.59 | 73.84 | 82.9  | 73.07 | 51.13 |
| 6540 | 68.53 | 73.74 | 82.75 | 72.94 | 51.07 |
| 6542 | 68.45 | 73.61 | 82.58 | 72.79 | 50.96 |
| 6544 | 68.38 | 73.49 | 82.43 | 72.66 | 50.88 |
| 6546 | 68.31 | 73.36 | 82.25 | 72.52 | 50.8  |
| 6548 | 68.22 | 73.23 | 82.08 | 72.34 | 50.68 |
| 6550 | 68.17 | 73.15 | 81.95 | 72.23 | 50.63 |
| 6552 | 68.06 | 73    | 81.77 | 72.06 | 50.53 |
| 6554 | 68.01 | 72.9  | 81.64 | 71.94 | 50.47 |
| 6556 | 67.99 | 72.82 | 81.52 | 71.83 | 50.43 |
| 6558 | 67.91 | 72.7  | 81.35 | 71.68 | 50.32 |
| 6560 | 67.84 | 72.59 | 81.22 | 71.54 | 50.26 |
| 6562 | 67.77 | 72.47 | 81.06 | 71.41 | 50.17 |
| 6564 | 67.73 | 72.38 | 80.93 | 71.32 | 50.13 |
| 6566 | 67.65 | 72.27 | 80.78 | 71.16 | 50.03 |
| 6568 | 67.57 | 72.15 | 80.62 | 71.01 | 49.93 |
| 6570 | 67.47 | 72.01 | 80.45 | 70.86 | 49.84 |
| 6572 | 67.44 | 71.93 | 80.31 | 70.76 | 49.82 |
| 6574 | 67.38 | 71.82 | 80.17 | 70.63 | 49.73 |
| 6576 | 67.3  | 71.72 | 80.03 | 70.5  | 49.64 |
| 6578 | 67.24 | 71.6  | 79.89 | 70.35 | 49.57 |
| 6580 | 67.15 | 71.47 | 79.69 | 70.18 | 49.48 |
| 6582 | 67.09 | 71.37 | 79.58 | 70.07 | 49.41 |
| 6584 | 66.99 | 71.24 | 79.41 | 69.93 | 49.31 |
| 6586 | 66.93 | 71.13 | 79.27 | 69.79 | 49.22 |
| 6588 | 66.84 | 70.99 | 79.08 | 69.62 | 49.12 |
| 6590 | 66.78 | 70.89 | 78.94 | 69.49 | 49.05 |
| 6592 | 66.72 | 70.78 | 78.81 | 69.38 | 48.98 |
| 6594 | 66.68 | 70.69 | 78.7  | 69.27 | 48.92 |
| 6596 | 66.59 | 70.56 | 78.52 | 69.11 | 48.85 |
| 6598 | 66.54 | 70.47 | 78.38 | 69    | 48.77 |
| 6600 | 66.46 | 70.38 | 78.24 | 68.87 | 48.69 |
| 6602 | 66.39 | 70.24 | 78.09 | 68.73 | 48.6  |
| 6604 | 66.34 | 70.15 | 77.93 | 68.61 | 48.53 |
| 6606 | 66.3  | 70.07 | 77.83 | 68.49 | 48.48 |
| 6608 | 66.21 | 69.95 | 77.68 | 68.35 | 48.4  |
| 6610 | 66.13 | 69.82 | 77.51 | 68.23 | 48.34 |
| 6612 | 66.08 | 69.73 | 77.39 | 68.11 | 48.27 |
| 6614 | 66.01 | 69.62 | 77.25 | 67.98 | 48.18 |
| 6616 | 65.95 | 69.51 | 77.12 | 67.86 | 48.11 |
| 6618 | 65.88 | 69.4  | 76.96 | 67.73 | 48.03 |
| 6620 | 65.82 | 69.3  | 76.83 | 67.6  | 47.95 |



|      |       |       |       |       |       |
|------|-------|-------|-------|-------|-------|
| 6622 | 65.75 | 69.2  | 76.7  | 67.48 | 47.89 |
| 6624 | 65.72 | 69.13 | 76.6  | 67.38 | 47.85 |
| 6626 | 65.63 | 68.99 | 76.42 | 67.25 | 47.77 |
| 6628 | 65.59 | 68.92 | 76.3  | 67.11 | 47.7  |
| 6630 | 65.53 | 68.83 | 76.19 | 67.02 | 47.64 |
| 6632 | 65.46 | 68.72 | 76.05 | 66.9  | 47.59 |
| 6634 | 65.4  | 68.63 | 75.94 | 66.79 | 47.53 |
| 6636 | 65.35 | 68.54 | 75.81 | 66.69 | 47.48 |
| 6638 | 65.29 | 68.44 | 75.67 | 66.53 | 47.39 |
| 6640 | 65.16 | 68.29 | 75.48 | 66.38 | 47.28 |
| 6642 | 65.12 | 68.19 | 75.34 | 66.27 | 47.22 |
| 6644 | 65.04 | 68.08 | 75.21 | 66.14 | 47.15 |
| 6646 | 64.98 | 67.99 | 75.08 | 66.03 | 47.08 |
| 6648 | 64.92 | 67.88 | 74.93 | 65.9  | 47    |
| 6650 | 64.89 | 67.83 | 74.85 | 65.83 | 46.98 |
| 6652 | 64.81 | 67.71 | 74.69 | 65.69 | 46.88 |
| 6654 | 64.75 | 67.62 | 74.56 | 65.56 | 46.81 |
| 6656 | 64.68 | 67.5  | 74.43 | 65.43 | 46.74 |
| 6658 | 64.6  | 67.39 | 74.28 | 65.31 | 46.66 |
| 6660 | 64.53 | 67.28 | 74.15 | 65.2  | 46.6  |
| 6662 | 64.5  | 67.21 | 74.04 | 65.09 | 46.54 |
| 6664 | 64.42 | 67.1  | 73.92 | 64.97 | 46.49 |
| 6666 | 64.34 | 66.97 | 73.77 | 64.84 | 46.4  |
| 6668 | 64.31 | 66.9  | 73.63 | 64.72 | 46.35 |
| 6670 | 64.27 | 66.83 | 73.54 | 64.64 | 46.3  |
| 6672 | 64.17 | 66.72 | 73.39 | 64.51 | 46.22 |
| 6674 | 64.11 | 66.59 | 73.24 | 64.39 | 46.14 |
| 6676 | 64.06 | 66.51 | 73.11 | 64.27 | 46.07 |
| 6678 | 64.02 | 66.45 | 73.01 | 64.18 | 46.02 |
| 6680 | 63.98 | 66.37 | 72.91 | 64.1  | 45.98 |
| 6682 | 63.9  | 66.27 | 72.77 | 63.99 | 45.91 |
| 6684 | 63.84 | 66.16 | 72.63 | 63.84 | 45.84 |
| 6686 | 63.75 | 66.04 | 72.48 | 63.71 | 45.74 |
| 6688 | 63.7  | 65.96 | 72.38 | 63.62 | 45.69 |
| 6690 | 63.65 | 65.88 | 72.27 | 63.52 | 45.64 |
| 6692 | 63.61 | 65.8  | 72.15 | 63.39 | 45.58 |
| 6694 | 63.52 | 65.68 | 72.01 | 63.28 | 45.52 |
| 6696 | 63.49 | 65.61 | 71.91 | 63.19 | 45.48 |
| 6698 | 63.38 | 65.5  | 71.78 | 63.05 | 45.38 |
| 6700 | 63.35 | 65.41 | 71.66 | 62.98 | 45.35 |
| 6702 | 63.24 | 65.27 | 71.48 | 62.8  | 45.22 |
| 6704 | 63.18 | 65.17 | 71.35 | 62.69 | 45.15 |
| 6706 | 63.07 | 65.03 | 71.18 | 62.57 | 45.08 |
| 6708 | 63.05 | 64.97 | 71.09 | 62.47 | 45.03 |

|      |       |       |       |       |       |
|------|-------|-------|-------|-------|-------|
| 6710 | 63    | 64.9  | 70.98 | 62.38 | 44.97 |
| 6712 | 62.93 | 64.8  | 70.87 | 62.27 | 44.91 |
| 6714 | 62.87 | 64.7  | 70.73 | 62.15 | 44.83 |
| 6716 | 62.81 | 64.61 | 70.6  | 62.05 | 44.78 |
| 6718 | 62.76 | 64.53 | 70.51 | 61.95 | 44.71 |
| 6720 | 62.71 | 64.44 | 70.39 | 61.85 | 44.66 |
| 6722 | 62.64 | 64.37 | 70.28 | 61.74 | 44.6  |
| 6724 | 62.58 | 64.26 | 70.14 | 61.6  | 44.53 |
| 6726 | 62.52 | 64.17 | 70.02 | 61.5  | 44.47 |
| 6728 | 62.49 | 64.11 | 69.93 | 61.42 | 44.44 |
| 6730 | 62.4  | 64    | 69.8  | 61.3  | 44.36 |
| 6732 | 62.35 | 63.9  | 69.66 | 61.2  | 44.29 |
| 6734 | 62.29 | 63.81 | 69.55 | 61.08 | 44.23 |
| 6736 | 62.22 | 63.71 | 69.42 | 60.97 | 44.17 |
| 6738 | 62.17 | 63.62 | 69.32 | 60.88 | 44.12 |
| 6740 | 62.09 | 63.52 | 69.17 | 60.75 | 44.02 |
| 6742 | 62.06 | 63.45 | 69.08 | 60.68 | 43.98 |
| 6744 | 62    | 63.37 | 68.97 | 60.58 | 43.93 |
| 6746 | 61.95 | 63.27 | 68.86 | 60.49 | 43.88 |
| 6748 | 61.89 | 63.19 | 68.73 | 60.37 | 43.82 |
| 6750 | 61.84 | 63.1  | 68.62 | 60.27 | 43.76 |
| 6752 | 61.78 | 63.02 | 68.52 | 60.18 | 43.71 |
| 6754 | 61.71 | 62.93 | 68.39 | 60.08 | 43.65 |
| 6756 | 61.64 | 62.82 | 68.27 | 59.95 | 43.59 |
| 6758 | 61.6  | 62.76 | 68.17 | 59.87 | 43.53 |
| 6760 | 61.55 | 62.67 | 68.06 | 59.78 | 43.47 |
| 6762 | 61.48 | 62.58 | 67.94 | 59.67 | 43.42 |
| 6764 | 61.42 | 62.49 | 67.82 | 59.55 | 43.34 |
| 6766 | 61.38 | 62.43 | 67.72 | 59.47 | 43.3  |
| 6768 | 61.32 | 62.35 | 67.61 | 59.38 | 43.25 |
| 6770 | 61.24 | 62.24 | 67.49 | 59.26 | 43.18 |
| 6772 | 61.19 | 62.16 | 67.39 | 59.16 | 43.13 |
| 6774 | 61.14 | 62.08 | 67.27 | 59.06 | 43.08 |
| 6776 | 61.11 | 62.01 | 67.17 | 58.97 | 43.04 |
| 6778 | 61.03 | 61.92 | 67.05 | 58.87 | 42.98 |
| 6780 | 60.96 | 61.81 | 66.92 | 58.75 | 42.92 |
| 6782 | 60.91 | 61.75 | 66.82 | 58.67 | 42.87 |
| 6784 | 60.82 | 61.63 | 66.69 | 58.56 | 42.79 |
| 6786 | 60.79 | 61.55 | 66.61 | 58.48 | 42.76 |
| 6788 | 60.75 | 61.48 | 66.49 | 58.38 | 42.7  |
| 6790 | 60.7  | 61.41 | 66.38 | 58.27 | 42.63 |
| 6792 | 60.64 | 61.31 | 66.28 | 58.18 | 42.58 |
| 6794 | 60.56 | 61.22 | 66.15 | 58.08 | 42.51 |
| 6796 | 60.54 | 61.16 | 66.08 | 57.99 | 42.5  |

|      |       |       |       |       |       |
|------|-------|-------|-------|-------|-------|
| 6798 | 60.49 | 61.09 | 65.98 | 57.91 | 42.44 |
| 6800 | 60.4  | 60.98 | 65.85 | 57.81 | 42.37 |
| 6802 | 60.36 | 60.91 | 65.75 | 57.72 | 42.32 |
| 6804 | 60.32 | 60.84 | 65.66 | 57.63 | 42.28 |
| 6806 | 60.26 | 60.76 | 65.55 | 57.53 | 42.23 |
| 6808 | 60.2  | 60.68 | 65.43 | 57.43 | 42.17 |
| 6810 | 60.12 | 60.56 | 65.3  | 57.33 | 42.1  |
| 6812 | 60.1  | 60.5  | 65.21 | 57.24 | 42.06 |
| 6814 | 60.04 | 60.43 | 65.11 | 57.15 | 42    |
| 6816 | 59.98 | 60.35 | 65    | 57.06 | 41.96 |
| 6818 | 59.93 | 60.28 | 64.93 | 56.99 | 41.92 |
| 6820 | 59.88 | 60.21 | 64.81 | 56.9  | 41.88 |
| 6822 | 59.83 | 60.12 | 64.7  | 56.79 | 41.81 |
| 6824 | 59.78 | 60.05 | 64.6  | 56.72 | 41.77 |
| 6826 | 59.73 | 59.97 | 64.5  | 56.63 | 41.72 |
| 6828 | 59.68 | 59.9  | 64.41 | 56.54 | 41.67 |
| 6830 | 59.62 | 59.82 | 64.3  | 56.44 | 41.59 |
| 6832 | 59.57 | 59.75 | 64.21 | 56.36 | 41.56 |
| 6834 | 59.52 | 59.66 | 64.12 | 56.28 | 41.52 |
| 6836 | 59.47 | 59.59 | 64    | 56.18 | 41.47 |
| 6838 | 59.39 | 59.49 | 63.88 | 56.05 | 41.37 |
| 6840 | 59.35 | 59.43 | 63.8  | 55.99 | 41.36 |
| 6842 | 59.29 | 59.34 | 63.68 | 55.92 | 41.32 |
| 6844 | 59.24 | 59.26 | 63.59 | 55.81 | 41.27 |
| 6846 | 59.2  | 59.19 | 63.51 | 55.73 | 41.22 |
| 6848 | 59.15 | 59.13 | 63.41 | 55.65 | 41.18 |
| 6850 | 59.11 | 59.06 | 63.32 | 55.59 | 41.15 |
| 6852 | 59.04 | 58.97 | 63.21 | 55.47 | 41.08 |
| 6854 | 59    | 58.9  | 63.11 | 55.39 | 41.04 |
| 6856 | 58.94 | 58.83 | 63.01 | 55.3  | 40.98 |
| 6858 | 58.88 | 58.74 | 62.92 | 55.21 | 40.94 |
| 6860 | 58.77 | 58.61 | 62.76 | 55.08 | 40.85 |
| 6862 | 58.74 | 58.56 | 62.68 | 55    | 40.81 |
| 6864 | 58.72 | 58.52 | 62.62 | 54.94 | 40.79 |
| 6866 | 58.67 | 58.43 | 62.52 | 54.86 | 40.74 |
| 6868 | 58.61 | 58.35 | 62.41 | 54.76 | 40.68 |
| 6870 | 58.56 | 58.3  | 62.33 | 54.69 | 40.65 |
| 6872 | 58.5  | 58.22 | 62.24 | 54.61 | 40.6  |
| 6874 | 58.45 | 58.13 | 62.15 | 54.53 | 40.55 |
| 6876 | 58.38 | 58.02 | 62.01 | 54.41 | 40.48 |
| 6878 | 58.33 | 57.95 | 61.9  | 54.32 | 40.41 |
| 6880 | 58.32 | 57.92 | 61.84 | 54.27 | 40.4  |
| 6882 | 58.24 | 57.82 | 61.73 | 54.19 | 40.35 |
| 6884 | 58.21 | 57.78 | 61.66 | 54.11 | 40.32 |

|      |       |       |       |       |       |
|------|-------|-------|-------|-------|-------|
| 6886 | 58.16 | 57.7  | 61.57 | 54.04 | 40.27 |
| 6888 | 58.08 | 57.61 | 61.45 | 53.94 | 40.2  |
| 6890 | 58.05 | 57.56 | 61.38 | 53.87 | 40.18 |
| 6892 | 57.98 | 57.47 | 61.26 | 53.76 | 40.11 |
| 6894 | 57.94 | 57.41 | 61.17 | 53.68 | 40.07 |
| 6896 | 57.9  | 57.36 | 61.1  | 53.63 | 40.04 |
| 6898 | 57.85 | 57.27 | 61.01 | 53.54 | 39.99 |
| 6900 | 57.8  | 57.21 | 60.91 | 53.45 | 39.94 |
| 6902 | 57.75 | 57.14 | 60.82 | 53.38 | 39.9  |
| 6904 | 57.68 | 57.05 | 60.72 | 53.28 | 39.84 |
| 6906 | 57.66 | 57    | 60.64 | 53.23 | 39.8  |
| 6908 | 57.59 | 56.89 | 60.51 | 53.11 | 39.74 |
| 6910 | 57.54 | 56.83 | 60.44 | 53.04 | 39.68 |
| 6912 | 57.5  | 56.77 | 60.36 | 52.97 | 39.65 |
| 6914 | 57.45 | 56.71 | 60.26 | 52.9  | 39.62 |
| 6916 | 57.42 | 56.65 | 60.19 | 52.83 | 39.58 |
| 6918 | 57.37 | 56.58 | 60.11 | 52.75 | 39.54 |
| 6920 | 57.29 | 56.49 | 59.99 | 52.65 | 39.48 |
| 6922 | 57.23 | 56.4  | 59.88 | 52.56 | 39.43 |
| 6924 | 57.2  | 56.36 | 59.82 | 52.49 | 39.39 |
| 6926 | 57.16 | 56.28 | 59.73 | 52.41 | 39.35 |
| 6928 | 57.09 | 56.19 | 59.63 | 52.32 | 39.29 |
| 6930 | 57.03 | 56.11 | 59.53 | 52.24 | 39.24 |
| 6932 | 57    | 56.07 | 59.45 | 52.18 | 39.22 |
| 6934 | 56.94 | 56    | 59.36 | 52.09 | 39.16 |
| 6936 | 56.92 | 55.95 | 59.3  | 52.03 | 39.14 |
| 6938 | 56.85 | 55.85 | 59.2  | 51.93 | 39.07 |
| 6940 | 56.82 | 55.79 | 59.1  | 51.88 | 39.05 |
| 6942 | 56.76 | 55.72 | 59.01 | 51.78 | 38.98 |
| 6944 | 56.7  | 55.66 | 58.93 | 51.72 | 38.95 |
| 6946 | 56.69 | 55.62 | 58.87 | 51.68 | 38.92 |
| 6948 | 56.6  | 55.51 | 58.74 | 51.55 | 38.83 |
| 6950 | 56.55 | 55.44 | 58.64 | 51.47 | 38.79 |
| 6952 | 56.54 | 55.41 | 58.59 | 51.42 | 38.77 |
| 6954 | 56.5  | 55.35 | 58.51 | 51.38 | 38.75 |
| 6956 | 56.44 | 55.27 | 58.42 | 51.29 | 38.7  |
| 6958 | 56.37 | 55.19 | 58.32 | 51.2  | 38.64 |
| 6960 | 56.35 | 55.15 | 58.26 | 51.15 | 38.62 |
| 6962 | 56.31 | 55.1  | 58.18 | 51.09 | 38.59 |
| 6964 | 56.25 | 55.01 | 58.06 | 50.99 | 38.53 |
| 6966 | 56.21 | 54.96 | 58    | 50.94 | 38.49 |
| 6968 | 56.17 | 54.9  | 57.93 | 50.87 | 38.47 |
| 6970 | 56.1  | 54.81 | 57.84 | 50.78 | 38.41 |
| 6972 | 56.03 | 54.72 | 57.72 | 50.67 | 38.36 |

|      |       |       |       |       |       |
|------|-------|-------|-------|-------|-------|
| 6974 | 56.02 | 54.69 | 57.67 | 50.63 | 38.34 |
| 6976 | 55.96 | 54.62 | 57.58 | 50.55 | 38.3  |
| 6978 | 55.92 | 54.57 | 57.52 | 50.5  | 38.27 |
| 6980 | 55.89 | 54.51 | 57.43 | 50.43 | 38.23 |
| 6982 | 55.85 | 54.46 | 57.35 | 50.35 | 38.18 |
| 6984 | 55.79 | 54.39 | 57.28 | 50.28 | 38.15 |
| 6986 | 55.72 | 54.3  | 57.19 | 50.2  | 38.09 |
| 6988 | 55.7  | 54.25 | 57.1  | 50.15 | 38.06 |
| 6990 | 55.64 | 54.18 | 57.01 | 50.06 | 38    |
| 6992 | 55.6  | 54.12 | 56.93 | 50    | 37.96 |
| 6994 | 55.56 | 54.06 | 56.85 | 49.94 | 37.95 |
| 6996 | 55.51 | 54.01 | 56.78 | 49.86 | 37.91 |
| 6998 | 55.47 | 53.96 | 56.71 | 49.8  | 37.86 |
| 7000 | 55.42 | 53.89 | 56.63 | 49.73 | 37.82 |
| 7002 | 55.35 | 53.8  | 56.53 | 49.64 | 37.76 |
| 7004 | 55.33 | 53.76 | 56.47 | 49.58 | 37.75 |
| 7006 | 55.26 | 53.67 | 56.36 | 49.49 | 37.69 |
| 7008 | 55.21 | 53.61 | 56.28 | 49.41 | 37.65 |
| 7010 | 55.17 | 53.55 | 56.22 | 49.36 | 37.63 |
| 7012 | 55.15 | 53.51 | 56.15 | 49.31 | 37.61 |
| 7014 | 55.05 | 53.41 | 56.02 | 49.19 | 37.52 |
| 7016 | 55.04 | 53.36 | 55.95 | 49.14 | 37.49 |
| 7018 | 55.02 | 53.33 | 55.92 | 49.12 | 37.49 |
| 7020 | 54.94 | 53.24 | 55.8  | 49    | 37.43 |
| 7022 | 54.92 | 53.2  | 55.75 | 48.96 | 37.4  |
| 7024 | 54.88 | 53.15 | 55.68 | 48.9  | 37.37 |
| 7026 | 54.83 | 53.08 | 55.58 | 48.83 | 37.32 |
| 7028 | 54.81 | 53.04 | 55.53 | 48.78 | 37.31 |
| 7030 | 54.77 | 52.99 | 55.46 | 48.72 | 37.27 |
| 7032 | 54.71 | 52.93 | 55.39 | 48.65 | 37.24 |
| 7034 | 54.63 | 52.81 | 55.26 | 48.55 | 37.16 |
| 7036 | 54.58 | 52.74 | 55.17 | 48.46 | 37.12 |
| 7038 | 54.55 | 52.7  | 55.11 | 48.41 | 37.1  |
| 7040 | 54.51 | 52.64 | 55.04 | 48.34 | 37.07 |
| 7042 | 54.46 | 52.58 | 54.97 | 48.28 | 37.03 |
| 7044 | 54.42 | 52.52 | 54.88 | 48.21 | 36.98 |
| 7046 | 54.4  | 52.48 | 54.83 | 48.18 | 36.98 |
| 7048 | 54.36 | 52.43 | 54.76 | 48.11 | 36.93 |
| 7050 | 54.33 | 52.38 | 54.71 | 48.07 | 36.91 |
| 7052 | 54.29 | 52.32 | 54.63 | 48    | 36.88 |
| 7054 | 54.25 | 52.26 | 54.55 | 47.94 | 36.85 |
| 7056 | 54.18 | 52.18 | 54.47 | 47.85 | 36.78 |
| 7058 | 54.12 | 52.11 | 54.38 | 47.78 | 36.73 |
| 7060 | 54.09 | 52.07 | 54.31 | 47.71 | 36.71 |

|      |       |       |       |       |       |
|------|-------|-------|-------|-------|-------|
| 7062 | 54.07 | 52.03 | 54.26 | 47.68 | 36.7  |
| 7064 | 54.01 | 51.97 | 54.19 | 47.61 | 36.65 |
| 7066 | 53.97 | 51.91 | 54.13 | 47.55 | 36.64 |
| 7068 | 53.91 | 51.84 | 54.02 | 47.47 | 36.59 |
| 7070 | 53.83 | 51.75 | 53.92 | 47.37 | 36.5  |
| 7072 | 53.84 | 51.74 | 53.9  | 47.36 | 36.52 |
| 7074 | 53.77 | 51.66 | 53.79 | 47.27 | 36.45 |
| 7076 | 53.75 | 51.62 | 53.74 | 47.23 | 36.44 |
| 7078 | 53.73 | 51.58 | 53.68 | 47.19 | 36.42 |
| 7080 | 53.69 | 51.53 | 53.62 | 47.13 | 36.39 |
| 7082 | 53.62 | 51.45 | 53.54 | 47.06 | 36.33 |
| 7084 | 53.59 | 51.41 | 53.46 | 47    | 36.31 |
| 7086 | 53.55 | 51.36 | 53.39 | 46.94 | 36.28 |
| 7088 | 53.49 | 51.31 | 53.33 | 46.89 | 36.24 |
| 7090 | 53.45 | 51.23 | 53.23 | 46.81 | 36.19 |
| 7092 | 53.42 | 51.2  | 53.18 | 46.76 | 36.18 |
| 7094 | 53.38 | 51.14 | 53.11 | 46.69 | 36.14 |
| 7096 | 53.28 | 51.05 | 53.01 | 46.6  | 36.09 |
| 7098 | 53.24 | 50.98 | 52.93 | 46.53 | 36.06 |
| 7100 | 53.24 | 50.96 | 52.88 | 46.5  | 36.04 |
| 7102 | 53.21 | 50.92 | 52.83 | 46.45 | 36.01 |
| 7104 | 53.14 | 50.84 | 52.74 | 46.38 | 35.97 |
| 7106 | 53.12 | 50.8  | 52.66 | 46.33 | 35.95 |
| 7108 | 53.07 | 50.74 | 52.6  | 46.25 | 35.91 |
| 7110 | 53.03 | 50.69 | 52.54 | 46.21 | 35.87 |
| 7112 | 53.01 | 50.64 | 52.48 | 46.16 | 35.85 |
| 7114 | 52.95 | 50.58 | 52.4  | 46.1  | 35.81 |
| 7116 | 52.91 | 50.53 | 52.34 | 46.03 | 35.77 |
| 7118 | 52.83 | 50.44 | 52.23 | 45.94 | 35.71 |
| 7120 | 52.82 | 50.41 | 52.19 | 45.91 | 35.7  |
| 7122 | 52.78 | 50.37 | 52.14 | 45.86 | 35.68 |
| 7124 | 52.75 | 50.32 | 52.07 | 45.81 | 35.65 |
| 7126 | 52.7  | 50.27 | 52    | 45.74 | 35.62 |
| 7128 | 52.63 | 50.2  | 51.93 | 45.67 | 35.57 |
| 7130 | 52.59 | 50.13 | 51.86 | 45.61 | 35.56 |
| 7132 | 52.55 | 50.07 | 51.77 | 45.53 | 35.49 |
| 7134 | 52.53 | 50.04 | 51.72 | 45.5  | 35.49 |
| 7136 | 52.45 | 49.95 | 51.63 | 45.42 | 35.43 |
| 7138 | 52.43 | 49.9  | 51.56 | 45.37 | 35.41 |
| 7140 | 52.38 | 49.85 | 51.5  | 45.29 | 35.36 |
| 7142 | 52.31 | 49.78 | 51.42 | 45.22 | 35.31 |
| 7144 | 52.3  | 49.75 | 51.37 | 45.2  | 35.3  |
| 7146 | 52.27 | 49.7  | 51.32 | 45.16 | 35.28 |
| 7148 | 52.22 | 49.63 | 51.23 | 45.09 | 35.25 |

|      |       |       |       |       |       |
|------|-------|-------|-------|-------|-------|
| 7150 | 52.21 | 49.63 | 51.21 | 45.05 | 35.23 |
| 7152 | 52.15 | 49.57 | 51.15 | 45    | 35.21 |
| 7154 | 52.14 | 49.52 | 51.1  | 44.95 | 35.19 |
| 7156 | 52.07 | 49.45 | 51.01 | 44.88 | 35.13 |
| 7158 | 52.03 | 49.41 | 50.94 | 44.82 | 35.09 |
| 7160 | 51.99 | 49.35 | 50.88 | 44.76 | 35.08 |
| 7162 | 51.97 | 49.31 | 50.83 | 44.71 | 35.05 |
| 7164 | 51.89 | 49.24 | 50.75 | 44.64 | 35.01 |
| 7166 | 51.89 | 49.22 | 50.71 | 44.61 | 35.01 |
| 7168 | 51.82 | 49.15 | 50.62 | 44.52 | 34.94 |
| 7170 | 51.75 | 49.05 | 50.53 | 44.45 | 34.9  |
| 7172 | 51.76 | 49.05 | 50.51 | 44.44 | 34.91 |
| 7174 | 51.72 | 49    | 50.44 | 44.38 | 34.87 |
| 7176 | 51.67 | 48.94 | 50.37 | 44.31 | 34.83 |
| 7178 | 51.65 | 48.9  | 50.32 | 44.28 | 34.82 |
| 7180 | 51.6  | 48.83 | 50.23 | 44.2  | 34.76 |
| 7182 | 51.53 | 48.77 | 50.15 | 44.13 | 34.72 |
| 7184 | 51.53 | 48.76 | 50.13 | 44.11 | 34.72 |
| 7186 | 51.49 | 48.7  | 50.06 | 44.06 | 34.69 |
| 7188 | 51.45 | 48.65 | 50    | 44    | 34.66 |
| 7190 | 51.42 | 48.61 | 49.95 | 43.96 | 34.66 |
| 7192 | 51.39 | 48.57 | 49.89 | 43.91 | 34.61 |
| 7194 | 51.32 | 48.49 | 49.79 | 43.84 | 34.56 |
| 7196 | 51.28 | 48.43 | 49.73 | 43.77 | 34.52 |
| 7198 | 51.25 | 48.4  | 49.68 | 43.74 | 34.52 |
| 7200 | 51.24 | 48.37 | 49.64 | 43.7  | 34.5  |
| 7202 | 51.2  | 48.32 | 49.59 | 43.66 | 34.47 |
| 7204 | 51.16 | 48.27 | 49.52 | 43.6  | 34.45 |
| 7206 | 51.13 | 48.23 | 49.46 | 43.56 | 34.42 |
| 7208 | 51.06 | 48.14 | 49.37 | 43.46 | 34.34 |
| 7210 | 51.06 | 48.13 | 49.35 | 43.46 | 34.36 |
| 7212 | 51    | 48.05 | 49.25 | 43.39 | 34.32 |
| 7214 | 50.93 | 47.97 | 49.16 | 43.3  | 34.25 |
| 7216 | 50.92 | 47.95 | 49.12 | 43.27 | 34.24 |
| 7218 | 50.87 | 47.91 | 49.06 | 43.22 | 34.21 |
| 7220 | 50.81 | 47.84 | 48.99 | 43.15 | 34.17 |
| 7222 | 50.78 | 47.81 | 48.95 | 43.12 | 34.16 |
| 7224 | 50.77 | 47.78 | 48.91 | 43.08 | 34.16 |
| 7226 | 50.74 | 47.74 | 48.85 | 43.03 | 34.13 |
| 7228 | 50.68 | 47.68 | 48.77 | 42.96 | 34.09 |
| 7230 | 50.65 | 47.63 | 48.72 | 42.91 | 34.05 |
| 7232 | 50.59 | 47.56 | 48.64 | 42.85 | 34.01 |
| 7234 | 50.55 | 47.53 | 48.59 | 42.83 | 33.99 |
| 7236 | 50.52 | 47.48 | 48.52 | 42.75 | 33.94 |

|      |       |       |       |       |       |
|------|-------|-------|-------|-------|-------|
| 7238 | 50.48 | 47.45 | 48.48 | 42.73 | 33.94 |
| 7240 | 50.44 | 47.39 | 48.41 | 42.67 | 33.88 |
| 7242 | 50.39 | 47.32 | 48.33 | 42.6  | 33.85 |
| 7244 | 50.37 | 47.31 | 48.31 | 42.58 | 33.85 |
| 7246 | 50.36 | 47.28 | 48.26 | 42.55 | 33.85 |
| 7248 | 50.3  | 47.23 | 48.2  | 42.49 | 33.81 |
| 7250 | 50.23 | 47.16 | 48.12 | 42.42 | 33.75 |
| 7252 | 50.19 | 47.09 | 48.05 | 42.33 | 33.7  |
| 7254 | 50.16 | 47.06 | 47.99 | 42.3  | 33.69 |
| 7256 | 50.12 | 47.01 | 47.94 | 42.25 | 33.67 |
| 7258 | 50.08 | 46.96 | 47.88 | 42.2  | 33.63 |
| 7260 | 50.02 | 46.89 | 47.8  | 42.13 | 33.58 |
| 7262 | 50.01 | 46.88 | 47.77 | 42.1  | 33.58 |
| 7264 | 49.98 | 46.86 | 47.73 | 42.08 | 33.58 |
| 7266 | 49.94 | 46.78 | 47.66 | 42.02 | 33.54 |
| 7268 | 49.91 | 46.73 | 47.61 | 41.97 | 33.52 |
| 7270 | 49.89 | 46.71 | 47.56 | 41.94 | 33.49 |
| 7272 | 49.84 | 46.66 | 47.51 | 41.89 | 33.46 |
| 7274 | 49.83 | 46.64 | 47.48 | 41.86 | 33.46 |
| 7276 | 49.79 | 46.59 | 47.43 | 41.81 | 33.43 |
| 7278 | 49.74 | 46.54 | 47.35 | 41.76 | 33.39 |
| 7280 | 49.69 | 46.48 | 47.29 | 41.7  | 33.35 |
| 7282 | 49.67 | 46.45 | 47.25 | 41.68 | 33.33 |
| 7284 | 49.63 | 46.4  | 47.19 | 41.61 | 33.3  |
| 7286 | 49.58 | 46.36 | 47.15 | 41.56 | 33.28 |
| 7288 | 49.59 | 46.35 | 47.13 | 41.56 | 33.3  |
| 7290 | 49.53 | 46.29 | 47.06 | 41.5  | 33.26 |
| 7292 | 49.46 | 46.21 | 46.96 | 41.41 | 33.19 |
| 7294 | 49.43 | 46.16 | 46.91 | 41.36 | 33.17 |
| 7296 | 49.41 | 46.14 | 46.87 | 41.33 | 33.14 |
| 7298 | 49.39 | 46.1  | 46.82 | 41.3  | 33.13 |
| 7300 | 49.35 | 46.05 | 46.77 | 41.27 | 33.12 |
| 7302 | 49.27 | 45.97 | 46.68 | 41.17 | 33.04 |
| 7304 | 49.25 | 45.95 | 46.64 | 41.14 | 33.03 |
| 7306 | 49.22 | 45.9  | 46.59 | 41.11 | 33.01 |
| 7308 | 49.18 | 45.86 | 46.54 | 41.06 | 32.99 |
| 7310 | 49.15 | 45.83 | 46.49 | 41.02 | 32.96 |
| 7312 | 49.15 | 45.82 | 46.47 | 41.01 | 32.97 |
| 7314 | 49.13 | 45.79 | 46.45 | 40.99 | 32.98 |
| 7316 | 49.06 | 45.72 | 46.36 | 40.9  | 32.92 |
| 7318 | 49.01 | 45.65 | 46.29 | 40.83 | 32.86 |
| 7320 | 48.99 | 45.63 | 46.24 | 40.79 | 32.85 |
| 7322 | 48.95 | 45.58 | 46.18 | 40.76 | 32.83 |
| 7324 | 48.9  | 45.52 | 46.11 | 40.69 | 32.79 |



|      |       |       |       |       |       |
|------|-------|-------|-------|-------|-------|
| 7326 | 48.89 | 45.5  | 46.09 | 40.67 | 32.79 |
| 7328 | 48.86 | 45.47 | 46.05 | 40.65 | 32.77 |
| 7330 | 48.8  | 45.39 | 45.97 | 40.58 | 32.72 |
| 7332 | 48.78 | 45.37 | 45.92 | 40.55 | 32.7  |
| 7334 | 48.73 | 45.32 | 45.86 | 40.49 | 32.68 |
| 7336 | 48.73 | 45.3  | 45.84 | 40.47 | 32.67 |
| 7338 | 48.67 | 45.24 | 45.77 | 40.42 | 32.64 |
| 7340 | 48.66 | 45.22 | 45.74 | 40.38 | 32.62 |
| 7342 | 48.6  | 45.16 | 45.67 | 40.33 | 32.57 |
| 7344 | 48.58 | 45.14 | 45.64 | 40.31 | 32.57 |
| 7346 | 48.56 | 45.1  | 45.59 | 40.27 | 32.56 |
| 7348 | 48.49 | 45.03 | 45.53 | 40.2  | 32.51 |
| 7350 | 48.49 | 45.03 | 45.51 | 40.19 | 32.52 |
| 7352 | 48.48 | 45    | 45.47 | 40.16 | 32.52 |
| 7354 | 48.4  | 44.93 | 45.39 | 40.09 | 32.46 |
| 7356 | 48.35 | 44.87 | 45.32 | 40.02 | 32.43 |
| 7358 | 48.34 | 44.83 | 45.27 | 39.98 | 32.41 |
| 7360 | 48.29 | 44.78 | 45.21 | 39.93 | 32.37 |
| 7362 | 48.24 | 44.73 | 45.16 | 39.89 | 32.35 |
| 7364 | 48.2  | 44.7  | 45.11 | 39.84 | 32.33 |
| 7366 | 48.18 | 44.66 | 45.06 | 39.81 | 32.3  |
| 7368 | 48.15 | 44.62 | 45.02 | 39.78 | 32.29 |
| 7370 | 48.11 | 44.58 | 44.97 | 39.73 | 32.26 |
| 7372 | 48.08 | 44.54 | 44.91 | 39.69 | 32.24 |
| 7374 | 48.03 | 44.49 | 44.85 | 39.63 | 32.21 |
| 7376 | 48.01 | 44.47 | 44.82 | 39.61 | 32.2  |
| 7378 | 47.98 | 44.42 | 44.76 | 39.57 | 32.18 |
| 7380 | 47.94 | 44.38 | 44.73 | 39.52 | 32.15 |
| 7382 | 47.91 | 44.34 | 44.68 | 39.49 | 32.13 |
| 7384 | 47.88 | 44.3  | 44.61 | 39.43 | 32.09 |
| 7386 | 47.88 | 44.29 | 44.61 | 39.42 | 32.11 |
| 7388 | 47.83 | 44.24 | 44.54 | 39.38 | 32.08 |
| 7390 | 47.79 | 44.19 | 44.49 | 39.34 | 32.05 |
| 7392 | 47.8  | 44.2  | 44.49 | 39.33 | 32.04 |
| 7394 | 47.73 | 44.12 | 44.4  | 39.27 | 32    |
| 7396 | 47.69 | 44.08 | 44.35 | 39.22 | 31.98 |
| 7398 | 47.66 | 44.04 | 44.31 | 39.18 | 31.96 |
| 7400 | 47.64 | 44.01 | 44.26 | 39.16 | 31.94 |
| 7402 | 47.6  | 43.97 | 44.22 | 39.12 | 31.92 |
| 7404 | 47.57 | 43.94 | 44.16 | 39.07 | 31.9  |
| 7406 | 47.55 | 43.89 | 44.12 | 39.03 | 31.87 |
| 7408 | 47.5  | 43.85 | 44.07 | 38.99 | 31.85 |
| 7410 | 47.48 | 43.82 | 44.03 | 38.96 | 31.83 |
| 7412 | 47.44 | 43.77 | 43.97 | 38.92 | 31.79 |

|      |       |       |       |       |       |
|------|-------|-------|-------|-------|-------|
| 7414 | 47.42 | 43.75 | 43.95 | 38.9  | 31.81 |
| 7416 | 47.38 | 43.71 | 43.9  | 38.84 | 31.78 |
| 7418 | 47.37 | 43.68 | 43.86 | 38.81 | 31.76 |
| 7420 | 47.32 | 43.63 | 43.8  | 38.77 | 31.73 |
| 7422 | 47.26 | 43.56 | 43.73 | 38.69 | 31.67 |
| 7424 | 47.26 | 43.55 | 43.71 | 38.69 | 31.69 |
| 7426 | 47.22 | 43.51 | 43.66 | 38.65 | 31.67 |
| 7428 | 47.19 | 43.48 | 43.62 | 38.62 | 31.65 |
| 7430 | 47.18 | 43.46 | 43.6  | 38.61 | 31.64 |
| 7432 | 47.17 | 43.43 | 43.56 | 38.57 | 31.62 |
| 7434 | 47.12 | 43.39 | 43.5  | 38.52 | 31.6  |
| 7436 | 47.07 | 43.33 | 43.43 | 38.46 | 31.56 |
| 7438 | 47.04 | 43.28 | 43.38 | 38.42 | 31.53 |
| 7440 | 47.01 | 43.26 | 43.34 | 38.39 | 31.52 |
| 7442 | 46.98 | 43.23 | 43.32 | 38.37 | 31.51 |
| 7444 | 46.94 | 43.18 | 43.25 | 38.31 | 31.49 |
| 7446 | 46.89 | 43.12 | 43.19 | 38.25 | 31.43 |
| 7448 | 46.88 | 43.11 | 43.18 | 38.25 | 31.44 |
| 7450 | 46.83 | 43.05 | 43.11 | 38.19 | 31.42 |
| 7452 | 46.77 | 42.99 | 43.04 | 38.12 | 31.36 |
| 7454 | 46.78 | 42.99 | 43.04 | 38.12 | 31.38 |
| 7456 | 46.75 | 42.96 | 43.01 | 38.1  | 31.37 |
| 7458 | 46.71 | 42.93 | 42.94 | 38.06 | 31.34 |
| 7460 | 46.69 | 42.9  | 42.91 | 38.02 | 31.32 |
| 7462 | 46.67 | 42.86 | 42.88 | 38    | 31.31 |
| 7464 | 46.62 | 42.83 | 42.82 | 37.95 | 31.28 |
| 7466 | 46.6  | 42.8  | 42.78 | 37.93 | 31.27 |
| 7468 | 46.53 | 42.72 | 42.72 | 37.85 | 31.22 |
| 7470 | 46.54 | 42.72 | 42.7  | 37.85 | 31.23 |
| 7472 | 46.5  | 42.67 | 42.65 | 37.81 | 31.21 |
| 7474 | 46.48 | 42.65 | 42.62 | 37.78 | 31.2  |
| 7476 | 46.44 | 42.62 | 42.57 | 37.75 | 31.18 |
| 7478 | 46.43 | 42.59 | 42.54 | 37.73 | 31.17 |
| 7480 | 46.38 | 42.54 | 42.49 | 37.68 | 31.14 |
| 7482 | 46.35 | 42.51 | 42.45 | 37.64 | 31.12 |
| 7484 | 46.32 | 42.47 | 42.4  | 37.61 | 31.1  |
| 7486 | 46.32 | 42.47 | 42.39 | 37.6  | 31.11 |
| 7488 | 46.27 | 42.41 | 42.33 | 37.55 | 31.07 |
| 7490 | 46.24 | 42.38 | 42.28 | 37.51 | 31.05 |
| 7492 | 46.21 | 42.34 | 42.24 | 37.48 | 31.03 |
| 7494 | 46.19 | 42.31 | 42.2  | 37.45 | 31.01 |
| 7496 | 46.16 | 42.27 | 42.16 | 37.42 | 30.99 |
| 7498 | 46.12 | 42.24 | 42.11 | 37.38 | 30.98 |
| 7500 | 46.09 | 42.2  | 42.09 | 37.36 | 30.96 |

|      |       |       |       |       |       |
|------|-------|-------|-------|-------|-------|
| 7502 | 46.07 | 42.17 | 42.05 | 37.32 | 30.94 |
| 7504 | 46.02 | 42.14 | 42    | 37.28 | 30.91 |
| 7506 | 46    | 42.11 | 41.96 | 37.24 | 30.89 |
| 7508 | 45.94 | 42.04 | 41.89 | 37.19 | 30.87 |
| 7510 | 45.91 | 42.02 | 41.86 | 37.15 | 30.85 |
| 7512 | 45.9  | 42    | 41.83 | 37.13 | 30.84 |
| 7514 | 45.86 | 41.95 | 41.77 | 37.09 | 30.8  |
| 7516 | 45.83 | 41.92 | 41.73 | 37.05 | 30.79 |
| 7518 | 45.8  | 41.89 | 41.7  | 37.02 | 30.76 |
| 7520 | 45.76 | 41.83 | 41.65 | 36.98 | 30.74 |
| 7522 | 45.72 | 41.79 | 41.59 | 36.94 | 30.71 |
| 7524 | 45.71 | 41.77 | 41.57 | 36.92 | 30.71 |
| 7526 | 45.69 | 41.75 | 41.54 | 36.89 | 30.7  |
| 7528 | 45.66 | 41.73 | 41.5  | 36.87 | 30.69 |
| 7530 | 45.61 | 41.67 | 41.44 | 36.83 | 30.66 |
| 7532 | 45.61 | 41.67 | 41.43 | 36.81 | 30.66 |
| 7534 | 45.59 | 41.64 | 41.4  | 36.79 | 30.65 |
| 7536 | 45.56 | 41.6  | 41.36 | 36.75 | 30.62 |
| 7538 | 45.51 | 41.56 | 41.31 | 36.7  | 30.6  |
| 7540 | 45.49 | 41.53 | 41.27 | 36.68 | 30.59 |
| 7542 | 45.46 | 41.5  | 41.24 | 36.64 | 30.58 |
| 7544 | 45.44 | 41.47 | 41.2  | 36.62 | 30.56 |
| 7546 | 45.4  | 41.44 | 41.16 | 36.59 | 30.55 |
| 7548 | 45.38 | 41.41 | 41.12 | 36.55 | 30.52 |
| 7550 | 45.35 | 41.38 | 41.08 | 36.52 | 30.51 |
| 7552 | 45.33 | 41.35 | 41.05 | 36.5  | 30.5  |
| 7554 | 45.3  | 41.31 | 41.01 | 36.48 | 30.48 |
| 7556 | 45.26 | 41.27 | 40.97 | 36.44 | 30.45 |
| 7558 | 45.27 | 41.26 | 40.95 | 36.42 | 30.46 |
| 7560 | 45.22 | 41.22 | 40.9  | 36.37 | 30.43 |
| 7562 | 45.14 | 41.16 | 40.83 | 36.33 | 30.39 |
| 7564 | 45.16 | 41.16 | 40.82 | 36.32 | 30.39 |
| 7566 | 45.13 | 41.14 | 40.79 | 36.29 | 30.37 |
| 7568 | 45.1  | 41.1  | 40.76 | 36.26 | 30.36 |
| 7570 | 45.07 | 41.06 | 40.72 | 36.22 | 30.35 |
| 7572 | 45.03 | 41.02 | 40.67 | 36.18 | 30.33 |
| 7574 | 45.01 | 40.99 | 40.63 | 36.15 | 30.32 |
| 7576 | 44.98 | 40.97 | 40.6  | 36.12 | 30.3  |
| 7578 | 44.96 | 40.93 | 40.56 | 36.1  | 30.29 |
| 7580 | 44.93 | 40.91 | 40.53 | 36.07 | 30.26 |
| 7582 | 44.9  | 40.87 | 40.49 | 36.03 | 30.24 |
| 7584 | 44.87 | 40.86 | 40.47 | 36.02 | 30.23 |
| 7586 | 44.85 | 40.82 | 40.43 | 35.99 | 30.22 |
| 7588 | 44.81 | 40.77 | 40.36 | 35.92 | 30.18 |

|      |       |       |       |       |       |
|------|-------|-------|-------|-------|-------|
| 7590 | 44.79 | 40.75 | 40.34 | 35.91 | 30.18 |
| 7592 | 44.77 | 40.73 | 40.31 | 35.9  | 30.17 |
| 7594 | 44.75 | 40.71 | 40.3  | 35.9  | 30.18 |
| 7596 | 44.72 | 40.67 | 40.24 | 35.85 | 30.14 |
| 7598 | 44.69 | 40.64 | 40.21 | 35.81 | 30.12 |
| 7600 | 44.66 | 40.61 | 40.17 | 35.78 | 30.11 |
| 7602 | 44.63 | 40.57 | 40.13 | 35.75 | 30.08 |
| 7604 | 44.59 | 40.53 | 40.09 | 35.72 | 30.05 |
| 7606 | 44.59 | 40.52 | 40.07 | 35.7  | 30.06 |
| 7608 | 44.55 | 40.49 | 40.03 | 35.67 | 30.04 |
| 7610 | 44.53 | 40.45 | 39.99 | 35.64 | 30.02 |
| 7612 | 44.5  | 40.43 | 39.96 | 35.61 | 30.01 |
| 7614 | 44.47 | 40.4  | 39.92 | 35.59 | 30    |
| 7616 | 44.43 | 40.36 | 39.88 | 35.54 | 29.97 |
| 7618 | 44.4  | 40.34 | 39.85 | 35.53 | 29.96 |
| 7620 | 44.38 | 40.31 | 39.82 | 35.5  | 29.94 |
| 7622 | 44.35 | 40.28 | 39.79 | 35.47 | 29.93 |
| 7624 | 44.31 | 40.25 | 39.74 | 35.43 | 29.9  |
| 7626 | 44.28 | 40.2  | 39.69 | 35.41 | 29.87 |
| 7628 | 44.28 | 40.19 | 39.68 | 35.39 | 29.89 |
| 7630 | 44.23 | 40.14 | 39.61 | 35.33 | 29.84 |
| 7632 | 44.19 | 40.1  | 39.58 | 35.29 | 29.82 |
| 7634 | 44.17 | 40.09 | 39.55 | 35.28 | 29.81 |
| 7636 | 44.13 | 40.04 | 39.51 | 35.24 | 29.78 |
| 7638 | 44.13 | 40.04 | 39.51 | 35.25 | 29.81 |
| 7640 | 44.11 | 40.02 | 39.48 | 35.22 | 29.79 |
| 7642 | 44.08 | 39.99 | 39.44 | 35.19 | 29.79 |
| 7644 | 44.04 | 39.95 | 39.39 | 35.16 | 29.77 |
| 7646 | 44.03 | 39.92 | 39.36 | 35.13 | 29.74 |
| 7648 | 43.99 | 39.89 | 39.32 | 35.1  | 29.72 |
| 7650 | 43.91 | 39.81 | 39.25 | 35.06 | 29.67 |
| 7652 | 43.89 | 39.78 | 39.21 | 35    | 29.65 |
| 7654 | 43.86 | 39.75 | 39.18 | 34.98 | 29.63 |
| 7656 | 43.87 | 39.76 | 39.18 | 34.98 | 29.64 |
| 7658 | 43.86 | 39.75 | 39.17 | 34.98 | 29.65 |
| 7660 | 43.8  | 39.68 | 39.09 | 34.92 | 29.61 |
| 7662 | 43.77 | 39.65 | 39.06 | 34.87 | 29.58 |
| 7664 | 43.74 | 39.62 | 39.02 | 34.86 | 29.57 |
| 7666 | 43.72 | 39.59 | 38.99 | 34.82 | 29.54 |
| 7668 | 43.72 | 39.61 | 39    | 34.85 | 29.58 |
| 7670 | 43.68 | 39.57 | 38.95 | 34.8  | 29.55 |
| 7672 | 43.68 | 39.56 | 38.94 | 34.8  | 29.56 |
| 7674 | 43.66 | 39.52 | 38.9  | 34.76 | 29.52 |
| 7676 | 43.61 | 39.49 | 38.86 | 34.73 | 29.51 |

|      |       |       |       |       |       |
|------|-------|-------|-------|-------|-------|
| 7678 | 43.59 | 39.47 | 38.85 | 34.71 | 29.5  |
| 7680 | 43.54 | 39.43 | 38.8  | 34.67 | 29.49 |
| 7682 | 43.49 | 39.35 | 38.72 | 34.6  | 29.43 |
| 7684 | 43.48 | 39.34 | 38.7  | 34.58 | 29.43 |
| 7686 | 43.44 | 39.32 | 38.68 | 34.57 | 29.42 |
| 7688 | 43.4  | 39.27 | 38.62 | 34.51 | 29.37 |
| 7690 | 43.4  | 39.27 | 38.61 | 34.52 | 29.38 |
| 7692 | 43.38 | 39.25 | 38.58 | 34.5  | 29.37 |
| 7694 | 43.36 | 39.24 | 38.57 | 34.49 | 29.37 |
| 7696 | 43.35 | 39.21 | 38.53 | 34.47 | 29.36 |
| 7698 | 43.33 | 39.2  | 38.52 | 34.45 | 29.37 |
| 7700 | 43.31 | 39.17 | 38.48 | 34.43 | 29.35 |
| 7702 | 43.29 | 39.14 | 38.45 | 34.41 | 29.34 |
| 7704 | 43.26 | 39.11 | 38.43 | 34.38 | 29.33 |
| 7706 | 43.24 | 39.09 | 38.4  | 34.36 | 29.31 |
| 7708 | 43.21 | 39.07 | 38.37 | 34.35 | 29.3  |
| 7710 | 43.19 | 39.04 | 38.33 | 34.31 | 29.29 |
| 7712 | 43.16 | 39.01 | 38.31 | 34.29 | 29.27 |
| 7714 | 43.14 | 38.98 | 38.28 | 34.26 | 29.26 |
| 7716 | 43.09 | 38.95 | 38.23 | 34.22 | 29.23 |
| 7718 | 43.08 | 38.93 | 38.22 | 34.21 | 29.22 |
| 7720 | 43.06 | 38.91 | 38.19 | 34.19 | 29.21 |
| 7722 | 43.02 | 38.88 | 38.15 | 34.14 | 29.19 |
| 7724 | 43.01 | 38.86 | 38.12 | 34.14 | 29.19 |
| 7726 | 42.98 | 38.84 | 38.1  | 34.12 | 29.18 |
| 7728 | 42.96 | 38.81 | 38.07 | 34.1  | 29.16 |
| 7730 | 42.93 | 38.77 | 38.03 | 34.07 | 29.15 |
| 7732 | 42.88 | 38.73 | 37.99 | 34.02 | 29.11 |
| 7734 | 42.87 | 38.71 | 37.95 | 34    | 29.1  |
| 7736 | 42.85 | 38.69 | 37.94 | 33.99 | 29.11 |
| 7738 | 42.83 | 38.66 | 37.91 | 33.96 | 29.1  |
| 7740 | 42.77 | 38.61 | 37.85 | 33.91 | 29.06 |
| 7742 | 42.74 | 38.58 | 37.81 | 33.87 | 29.05 |
| 7744 | 42.75 | 38.59 | 37.82 | 33.88 | 29.06 |
| 7746 | 42.73 | 38.57 | 37.8  | 33.86 | 29.05 |
| 7748 | 42.71 | 38.54 | 37.76 | 33.84 | 29.03 |
| 7750 | 42.68 | 38.51 | 37.73 | 33.8  | 29.01 |
| 7752 | 42.65 | 38.48 | 37.7  | 33.78 | 29    |
| 7754 | 42.63 | 38.46 | 37.67 | 33.77 | 28.99 |
| 7756 | 42.6  | 38.44 | 37.63 | 33.74 | 28.99 |
| 7758 | 42.57 | 38.41 | 37.61 | 33.71 | 28.97 |
| 7760 | 42.55 | 38.39 | 37.58 | 33.7  | 28.95 |
| 7762 | 42.53 | 38.36 | 37.55 | 33.68 | 28.94 |
| 7764 | 42.48 | 38.31 | 37.5  | 33.62 | 28.9  |

|      |       |       |       |       |       |
|------|-------|-------|-------|-------|-------|
| 7766 | 42.48 | 38.31 | 37.49 | 33.62 | 28.91 |
| 7768 | 42.46 | 38.29 | 37.47 | 33.61 | 28.91 |
| 7770 | 42.44 | 38.27 | 37.44 | 33.59 | 28.9  |
| 7772 | 42.4  | 38.23 | 37.4  | 33.55 | 28.87 |
| 7774 | 42.4  | 38.21 | 37.38 | 33.54 | 28.86 |
| 7776 | 42.37 | 38.19 | 37.35 | 33.51 | 28.86 |
| 7778 | 42.33 | 38.16 | 37.32 | 33.48 | 28.83 |
| 7780 | 42.3  | 38.13 | 37.28 | 33.45 | 28.81 |
| 7782 | 42.28 | 38.11 | 37.26 | 33.43 | 28.82 |
| 7784 | 42.27 | 38.09 | 37.24 | 33.41 | 28.81 |
| 7786 | 42.24 | 38.07 | 37.22 | 33.39 | 28.8  |
| 7788 | 42.22 | 38.04 | 37.19 | 33.37 | 28.79 |
| 7790 | 42.15 | 37.98 | 37.12 | 33.3  | 28.73 |
| 7792 | 42.14 | 37.98 | 37.11 | 33.29 | 28.73 |
| 7794 | 42.13 | 37.97 | 37.1  | 33.3  | 28.74 |
| 7796 | 42.12 | 37.94 | 37.08 | 33.29 | 28.74 |
| 7798 | 42.1  | 37.93 | 37.04 | 33.26 | 28.72 |
| 7800 | 42.04 | 37.86 | 36.98 | 33.19 | 28.68 |
| 7802 | 42.04 | 37.86 | 36.97 | 33.21 | 28.69 |
| 7804 | 42.03 | 37.86 | 36.97 | 33.2  | 28.69 |
| 7806 | 42    | 37.82 | 36.93 | 33.17 | 28.66 |
| 7808 | 41.96 | 37.78 | 36.9  | 33.15 | 28.65 |
| 7810 | 41.95 | 37.76 | 36.87 | 33.12 | 28.66 |
| 7812 | 41.94 | 37.75 | 36.86 | 33.1  | 28.65 |
| 7814 | 41.9  | 37.71 | 36.81 | 33.07 | 28.62 |
| 7816 | 41.86 | 37.69 | 36.78 | 33.04 | 28.62 |
| 7818 | 41.84 | 37.66 | 36.76 | 33.03 | 28.61 |
| 7820 | 41.8  | 37.64 | 36.73 | 33    | 28.59 |
| 7822 | 41.81 | 37.64 | 36.72 | 32.99 | 28.59 |
| 7824 | 41.8  | 37.62 | 36.7  | 32.98 | 28.59 |
| 7826 | 41.77 | 37.59 | 36.67 | 32.96 | 28.57 |
| 7828 | 41.71 | 37.52 | 36.59 | 32.88 | 28.52 |
| 7830 | 41.68 | 37.49 | 36.56 | 32.86 | 28.5  |
| 7832 | 41.64 | 37.46 | 36.53 | 32.82 | 28.48 |
| 7834 | 41.64 | 37.46 | 36.52 | 32.82 | 28.48 |
| 7836 | 41.61 | 37.43 | 36.49 | 32.8  | 28.47 |
| 7838 | 41.59 | 37.42 | 36.48 | 32.78 | 28.47 |
| 7840 | 41.56 | 37.38 | 36.45 | 32.76 | 28.46 |
| 7842 | 41.53 | 37.35 | 36.41 | 32.74 | 28.43 |
| 7844 | 41.5  | 37.32 | 36.37 | 32.69 | 28.42 |
| 7846 | 41.49 | 37.32 | 36.36 | 32.7  | 28.42 |
| 7848 | 41.44 | 37.27 | 36.31 | 32.65 | 28.38 |
| 7850 | 41.43 | 37.25 | 36.3  | 32.64 | 28.37 |
| 7852 | 41.43 | 37.25 | 36.28 | 32.64 | 28.38 |

|      |       |       |       |       |       |
|------|-------|-------|-------|-------|-------|
| 7854 | 41.39 | 37.2  | 36.24 | 32.6  | 28.36 |
| 7856 | 41.38 | 37.2  | 36.24 | 32.6  | 28.36 |
| 7858 | 41.35 | 37.17 | 36.21 | 32.57 | 28.34 |
| 7860 | 41.37 | 37.17 | 36.2  | 32.58 | 28.36 |
| 7862 | 41.37 | 37.18 | 36.2  | 32.58 | 28.37 |
| 7864 | 41.34 | 37.15 | 36.18 | 32.58 | 28.36 |
| 7866 | 41.31 | 37.13 | 36.14 | 32.54 | 28.34 |
| 7868 | 41.27 | 37.09 | 36.11 | 32.52 | 28.33 |
| 7870 | 41.22 | 37.03 | 36.04 | 32.45 | 28.28 |
| 7872 | 41.24 | 37.06 | 36.06 | 32.48 | 28.31 |
| 7874 | 41.23 | 37.04 | 36.05 | 32.46 | 28.31 |
| 7876 | 41.19 | 37.01 | 36.01 | 32.44 | 28.29 |
| 7878 | 41.16 | 36.97 | 35.96 | 32.4  | 28.26 |
| 7880 | 41.14 | 36.97 | 35.96 | 32.38 | 28.24 |
| 7882 | 41.1  | 36.92 | 35.91 | 32.35 | 28.21 |
| 7884 | 41.07 | 36.9  | 35.89 | 32.35 | 28.23 |
| 7886 | 41.03 | 36.85 | 35.84 | 32.28 | 28.19 |
| 7888 | 41    | 36.82 | 35.82 | 32.27 | 28.18 |
| 7890 | 41    | 36.83 | 35.83 | 32.28 | 28.2  |
| 7892 | 41    | 36.83 | 35.82 | 32.27 | 28.21 |
| 7894 | 41    | 36.82 | 35.79 | 32.26 | 28.2  |
| 7896 | 40.97 | 36.8  | 35.77 | 32.24 | 28.19 |
| 7898 | 40.92 | 36.74 | 35.72 | 32.19 | 28.15 |
| 7900 | 40.9  | 36.72 | 35.69 | 32.16 | 28.13 |
| 7902 | 40.85 | 36.67 | 35.63 | 32.12 | 28.09 |
| 7904 | 40.83 | 36.65 | 35.61 | 32.11 | 28.08 |
| 7906 | 40.81 | 36.62 | 35.59 | 32.1  | 28.08 |
| 7908 | 40.82 | 36.64 | 35.6  | 32.13 | 28.1  |
| 7910 | 40.8  | 36.61 | 35.57 | 32.08 | 28.08 |
| 7912 | 40.74 | 36.57 | 35.51 | 32.03 | 28.05 |
| 7914 | 40.72 | 36.55 | 35.51 | 32.03 | 28.04 |
| 7916 | 40.71 | 36.54 | 35.49 | 32.01 | 28.04 |
| 7918 | 40.71 | 36.53 | 35.47 | 32.01 | 28.05 |
| 7920 | 40.68 | 36.51 | 35.45 | 32    | 28.03 |
| 7922 | 40.64 | 36.47 | 35.41 | 31.96 | 28.02 |
| 7924 | 40.66 | 36.49 | 35.42 | 31.98 | 28.04 |
| 7926 | 40.64 | 36.46 | 35.41 | 31.95 | 28.02 |
| 7928 | 40.61 | 36.44 | 35.38 | 31.93 | 28.02 |
| 7930 | 40.59 | 36.43 | 35.36 | 31.91 | 28.01 |
| 7932 | 40.53 | 36.37 | 35.29 | 31.86 | 27.98 |
| 7934 | 40.51 | 36.34 | 35.27 | 31.83 | 27.94 |
| 7936 | 40.5  | 36.32 | 35.25 | 31.82 | 27.95 |
| 7938 | 40.48 | 36.31 | 35.23 | 31.81 | 27.96 |
| 7940 | 40.48 | 36.32 | 35.24 | 31.82 | 27.97 |

|      |       |       |       |       |       |
|------|-------|-------|-------|-------|-------|
| 7942 | 40.43 | 36.27 | 35.19 | 31.77 | 27.91 |
| 7944 | 40.39 | 36.23 | 35.15 | 31.74 | 27.9  |
| 7946 | 40.37 | 36.19 | 35.11 | 31.71 | 27.88 |
| 7948 | 40.37 | 36.21 | 35.12 | 31.71 | 27.9  |
| 7950 | 40.33 | 36.16 | 35.07 | 31.68 | 27.86 |
| 7952 | 40.3  | 36.14 | 35.04 | 31.65 | 27.84 |
| 7954 | 40.29 | 36.12 | 35.01 | 31.64 | 27.83 |
| 7956 | 40.27 | 36.09 | 35    | 31.63 | 27.83 |
| 7958 | 40.26 | 36.09 | 35    | 31.63 | 27.84 |
| 7960 | 40.25 | 36.08 | 34.99 | 31.63 | 27.84 |
| 7962 | 40.23 | 36.06 | 34.97 | 31.62 | 27.83 |
| 7964 | 40.2  | 36.03 | 34.93 | 31.57 | 27.81 |
| 7966 | 40.16 | 36    | 34.88 | 31.54 | 27.78 |
| 7968 | 40.17 | 36.01 | 34.89 | 31.55 | 27.8  |
| 7970 | 40.11 | 35.96 | 34.84 | 31.51 | 27.76 |
| 7972 | 40.08 | 35.93 | 34.82 | 31.48 | 27.75 |
| 7974 | 40.06 | 35.91 | 34.79 | 31.46 | 27.74 |
| 7976 | 40.04 | 35.89 | 34.77 | 31.43 | 27.73 |
| 7978 | 40.02 | 35.87 | 34.74 | 31.41 | 27.72 |
| 7980 | 39.99 | 35.85 | 34.72 | 31.4  | 27.71 |
| 7982 | 39.96 | 35.81 | 34.68 | 31.36 | 27.68 |
| 7984 | 39.92 | 35.78 | 34.65 | 31.33 | 27.66 |
| 7986 | 39.93 | 35.77 | 34.64 | 31.33 | 27.66 |
| 7988 | 39.92 | 35.76 | 34.63 | 31.34 | 27.66 |
| 7990 | 39.91 | 35.75 | 34.62 | 31.34 | 27.66 |
| 7992 | 39.88 | 35.73 | 34.59 | 31.32 | 27.66 |
| 7994 | 39.85 | 35.71 | 34.57 | 31.29 | 27.64 |
| 7996 | 39.84 | 35.69 | 34.54 | 31.27 | 27.63 |
| 7998 | 39.85 | 35.72 | 34.55 | 31.29 | 27.65 |
| 8000 | 39.8  | 35.66 | 34.51 | 31.25 | 27.62 |
| 8002 | 39.77 | 35.63 | 34.49 | 31.22 | 27.6  |
| 8004 | 39.78 | 35.64 | 34.49 | 31.23 | 27.63 |
| 8006 | 39.73 | 35.59 | 34.45 | 31.19 | 27.59 |
| 8008 | 39.69 | 35.56 | 34.4  | 31.16 | 27.58 |
| 8010 | 39.68 | 35.54 | 34.39 | 31.15 | 27.57 |
| 8012 | 39.69 | 35.55 | 34.39 | 31.14 | 27.57 |
| 8014 | 39.65 | 35.52 | 34.35 | 31.13 | 27.55 |
| 8016 | 39.64 | 35.5  | 34.35 | 31.12 | 27.57 |
| 8018 | 39.61 | 35.47 | 34.31 | 31.1  | 27.54 |
| 8020 | 39.61 | 35.47 | 34.31 | 31.09 | 27.53 |
| 8022 | 39.59 | 35.44 | 34.27 | 31.07 | 27.52 |
| 8024 | 39.55 | 35.41 | 34.25 | 31.04 | 27.51 |
| 8026 | 39.53 | 35.39 | 34.22 | 31.02 | 27.49 |
| 8028 | 39.49 | 35.35 | 34.18 | 31    | 27.48 |



|      |       |       |       |       |       |
|------|-------|-------|-------|-------|-------|
| 8030 | 39.49 | 35.36 | 34.18 | 30.99 | 27.48 |
| 8032 | 39.47 | 35.34 | 34.16 | 30.97 | 27.47 |
| 8034 | 39.42 | 35.29 | 34.12 | 30.93 | 27.45 |
| 8036 | 39.37 | 35.24 | 34.07 | 30.89 | 27.41 |
| 8038 | 39.35 | 35.22 | 34.04 | 30.86 | 27.39 |
| 8040 | 39.37 | 35.25 | 34.06 | 30.89 | 27.41 |
| 8042 | 39.36 | 35.24 | 34.05 | 30.88 | 27.42 |
| 8044 | 39.32 | 35.19 | 34.02 | 30.85 | 27.41 |
| 8046 | 39.33 | 35.19 | 34    | 30.84 | 27.4  |
| 8048 | 39.29 | 35.15 | 33.95 | 30.82 | 27.37 |
| 8050 | 39.28 | 35.15 | 33.96 | 30.82 | 27.38 |
| 8052 | 39.24 | 35.13 | 33.93 | 30.8  | 27.35 |
| 8054 | 39.23 | 35.11 | 33.9  | 30.76 | 27.33 |
| 8056 | 39.22 | 35.11 | 33.89 | 30.77 | 27.35 |
| 8058 | 39.23 | 35.09 | 33.89 | 30.78 | 27.38 |
| 8060 | 39.2  | 35.07 | 33.86 | 30.75 | 27.34 |
| 8062 | 39.17 | 35.05 | 33.84 | 30.72 | 27.33 |
| 8064 | 39.17 | 35.06 | 33.84 | 30.72 | 27.34 |
| 8066 | 39.11 | 35    | 33.78 | 30.68 | 27.31 |
| 8068 | 39.08 | 34.97 | 33.74 | 30.64 | 27.29 |
| 8070 | 39.05 | 34.94 | 33.72 | 30.63 | 27.28 |
| 8072 | 39.05 | 34.92 | 33.71 | 30.62 | 27.26 |
| 8074 | 39.03 | 34.92 | 33.69 | 30.59 | 27.25 |
| 8076 | 39.02 | 34.91 | 33.68 | 30.6  | 27.26 |
| 8078 | 38.98 | 34.87 | 33.63 | 30.57 | 27.24 |
| 8080 | 38.97 | 34.85 | 33.63 | 30.55 | 27.23 |
| 8082 | 38.95 | 34.83 | 33.59 | 30.53 | 27.21 |
| 8084 | 38.92 | 34.81 | 33.58 | 30.51 | 27.19 |
| 8086 | 38.93 | 34.81 | 33.56 | 30.52 | 27.21 |
| 8088 | 38.92 | 34.8  | 33.56 | 30.52 | 27.21 |
| 8090 | 38.9  | 34.78 | 33.54 | 30.5  | 27.21 |
| 8092 | 38.88 | 34.76 | 33.53 | 30.49 | 27.2  |
| 8094 | 38.86 | 34.74 | 33.51 | 30.46 | 27.19 |
| 8096 | 38.84 | 34.73 | 33.49 | 30.45 | 27.17 |
| 8098 | 38.8  | 34.7  | 33.46 | 30.43 | 27.15 |
| 8100 | 38.78 | 34.67 | 33.41 | 30.4  | 27.13 |
| 8102 | 38.71 | 34.62 | 33.36 | 30.34 | 27.08 |
| 8104 | 38.69 | 34.59 | 33.33 | 30.32 | 27.07 |
| 8106 | 38.67 | 34.58 | 33.32 | 30.31 | 27.07 |
| 8108 | 38.66 | 34.56 | 33.3  | 30.3  | 27.07 |
| 8110 | 38.64 | 34.54 | 33.28 | 30.27 | 27.06 |
| 8112 | 38.61 | 34.52 | 33.26 | 30.27 | 27.05 |
| 8114 | 38.64 | 34.55 | 33.27 | 30.29 | 27.07 |
| 8116 | 38.61 | 34.52 | 33.25 | 30.27 | 27.06 |

|      |       |       |       |       |       |
|------|-------|-------|-------|-------|-------|
| 8118 | 38.62 | 34.54 | 33.27 | 30.29 | 27.09 |
| 8120 | 38.55 | 34.46 | 33.19 | 30.22 | 27.03 |
| 8122 | 38.57 | 34.49 | 33.21 | 30.24 | 27.05 |
| 8124 | 38.53 | 34.45 | 33.16 | 30.2  | 27.02 |
| 8126 | 38.54 | 34.46 | 33.18 | 30.23 | 27.05 |
| 8128 | 38.53 | 34.44 | 33.18 | 30.21 | 27.04 |
| 8130 | 38.5  | 34.42 | 33.15 | 30.2  | 27.03 |
| 8132 | 38.47 | 34.39 | 33.11 | 30.17 | 27.01 |
| 8134 | 38.47 | 34.39 | 33.11 | 30.17 | 27.02 |
| 8136 | 38.45 | 34.38 | 33.1  | 30.16 | 27.01 |
| 8138 | 38.43 | 34.36 | 33.07 | 30.14 | 27.01 |
| 8140 | 38.4  | 34.33 | 33.04 | 30.13 | 27    |
| 8142 | 38.38 | 34.31 | 33.03 | 30.11 | 26.99 |
| 8144 | 38.38 | 34.3  | 33.02 | 30.1  | 26.99 |
| 8146 | 38.35 | 34.28 | 32.99 | 30.08 | 26.95 |
| 8148 | 38.34 | 34.28 | 32.98 | 30.08 | 26.97 |
| 8150 | 38.32 | 34.26 | 32.96 | 30.06 | 26.96 |
| 8152 | 38.28 | 34.21 | 32.92 | 30.02 | 26.92 |
| 8154 | 38.26 | 34.2  | 32.91 | 30.02 | 26.93 |
| 8156 | 38.24 | 34.18 | 32.88 | 29.99 | 26.92 |
| 8158 | 38.21 | 34.16 | 32.85 | 29.96 | 26.9  |
| 8160 | 38.22 | 34.16 | 32.86 | 29.98 | 26.92 |
| 8162 | 38.2  | 34.16 | 32.86 | 29.98 | 26.93 |
| 8164 | 38.16 | 34.11 | 32.81 | 29.93 | 26.89 |
| 8166 | 38.15 | 34.09 | 32.78 | 29.91 | 26.87 |
| 8168 | 38.14 | 34.09 | 32.78 | 29.91 | 26.88 |
| 8170 | 38.13 | 34.08 | 32.78 | 29.91 | 26.89 |
| 8172 | 38.11 | 34.06 | 32.76 | 29.9  | 26.88 |
| 8174 | 38.1  | 34.04 | 32.74 | 29.87 | 26.87 |
| 8176 | 38.07 | 34.04 | 32.73 | 29.86 | 26.86 |
| 8178 | 38.08 | 34.04 | 32.72 | 29.86 | 26.87 |
| 8180 | 38.06 | 34.02 | 32.73 | 29.87 | 26.89 |
| 8182 | 38.02 | 33.99 | 32.68 | 29.83 | 26.84 |
| 8184 | 38    | 33.97 | 32.66 | 29.82 | 26.83 |
| 8186 | 37.99 | 33.95 | 32.63 | 29.81 | 26.83 |
| 8188 | 37.97 | 33.93 | 32.62 | 29.79 | 26.82 |
| 8190 | 37.95 | 33.92 | 32.61 | 29.78 | 26.81 |
| 8192 | 37.94 | 33.9  | 32.58 | 29.76 | 26.81 |
| 8194 | 37.92 | 33.88 | 32.57 | 29.75 | 26.81 |
| 8196 | 37.93 | 33.89 | 32.57 | 29.75 | 26.81 |
| 8198 | 37.88 | 33.86 | 32.53 | 29.73 | 26.78 |
| 8200 | 37.87 | 33.84 | 32.52 | 29.72 | 26.77 |
| 8202 | 37.85 | 33.82 | 32.5  | 29.7  | 26.77 |
| 8204 | 37.83 | 33.78 | 32.47 | 29.67 | 26.75 |

|      |       |       |       |       |       |
|------|-------|-------|-------|-------|-------|
| 8206 | 37.76 | 33.73 | 32.42 | 29.64 | 26.72 |
| 8208 | 37.75 | 33.73 | 32.41 | 29.63 | 26.72 |
| 8210 | 37.76 | 33.73 | 32.42 | 29.62 | 26.72 |
| 8212 | 37.73 | 33.7  | 32.38 | 29.61 | 26.72 |
| 8214 | 37.69 | 33.67 | 32.35 | 29.58 | 26.68 |
| 8216 | 37.71 | 33.69 | 32.37 | 29.59 | 26.71 |
| 8218 | 37.7  | 33.68 | 32.36 | 29.59 | 26.71 |
| 8220 | 37.68 | 33.66 | 32.34 | 29.57 | 26.68 |
| 8222 | 37.66 | 33.64 | 32.32 | 29.56 | 26.69 |
| 8224 | 37.65 | 33.63 | 32.32 | 29.55 | 26.68 |
| 8226 | 37.61 | 33.61 | 32.28 | 29.53 | 26.67 |
| 8228 | 37.58 | 33.57 | 32.24 | 29.51 | 26.65 |
| 8230 | 37.57 | 33.56 | 32.23 | 29.48 | 26.63 |
| 8232 | 37.56 | 33.55 | 32.23 | 29.48 | 26.64 |
| 8234 | 37.54 | 33.54 | 32.22 | 29.47 | 26.63 |
| 8236 | 37.52 | 33.52 | 32.19 | 29.45 | 26.62 |
| 8238 | 37.47 | 33.47 | 32.14 | 29.4  | 26.58 |
| 8240 | 37.49 | 33.48 | 32.16 | 29.41 | 26.61 |
| 8242 | 37.48 | 33.47 | 32.15 | 29.41 | 26.62 |
| 8244 | 37.45 | 33.45 | 32.12 | 29.39 | 26.6  |
| 8246 | 37.41 | 33.42 | 32.1  | 29.36 | 26.57 |
| 8248 | 37.38 | 33.38 | 32.06 | 29.32 | 26.55 |
| 8250 | 37.36 | 33.36 | 32.03 | 29.3  | 26.52 |
| 8252 | 37.39 | 33.4  | 32.07 | 29.35 | 26.58 |
| 8254 | 37.38 | 33.39 | 32.05 | 29.34 | 26.57 |
| 8256 | 37.34 | 33.36 | 32.03 | 29.32 | 26.55 |
| 8258 | 37.35 | 33.35 | 32.03 | 29.33 | 26.56 |
| 8260 | 37.33 | 33.34 | 32.01 | 29.31 | 26.55 |
| 8262 | 37.28 | 33.28 | 31.96 | 29.26 | 26.52 |
| 8264 | 37.27 | 33.29 | 31.96 | 29.26 | 26.52 |
| 8266 | 37.22 | 33.23 | 31.9  | 29.22 | 26.48 |
| 8268 | 37.21 | 33.22 | 31.89 | 29.2  | 26.47 |
| 8270 | 37.19 | 33.22 | 31.88 | 29.2  | 26.48 |
| 8272 | 37.19 | 33.2  | 31.87 | 29.2  | 26.48 |
| 8274 | 37.2  | 33.22 | 31.88 | 29.2  | 26.48 |
| 8276 | 37.16 | 33.17 | 31.83 | 29.16 | 26.46 |
| 8278 | 37.12 | 33.14 | 31.8  | 29.13 | 26.44 |
| 8280 | 37.1  | 33.12 | 31.79 | 29.13 | 26.42 |
| 8282 | 37.08 | 33.11 | 31.77 | 29.11 | 26.41 |
| 8284 | 37.08 | 33.1  | 31.77 | 29.11 | 26.42 |
| 8286 | 37.09 | 33.12 | 31.79 | 29.13 | 26.45 |
| 8288 | 37.05 | 33.08 | 31.75 | 29.1  | 26.43 |
| 8290 | 37.02 | 33.05 | 31.7  | 29.06 | 26.41 |
| 8292 | 37.04 | 33.08 | 31.73 | 29.08 | 26.44 |

|      |       |       |       |       |       |
|------|-------|-------|-------|-------|-------|
| 8294 | 37.04 | 33.07 | 31.72 | 29.08 | 26.43 |
| 8296 | 36.99 | 33.02 | 31.68 | 29.05 | 26.41 |
| 8298 | 36.96 | 33    | 31.66 | 29.03 | 26.38 |
| 8300 | 36.95 | 32.99 | 31.65 | 29.03 | 26.38 |
| 8302 | 36.97 | 32.99 | 31.65 | 29.03 | 26.4  |
| 8304 | 36.91 | 32.95 | 31.61 | 28.99 | 26.36 |
| 8306 | 36.89 | 32.94 | 31.59 | 28.99 | 26.36 |
| 8308 | 36.89 | 32.93 | 31.59 | 28.98 | 26.36 |
| 8310 | 36.91 | 32.95 | 31.61 | 29.01 | 26.39 |
| 8312 | 36.86 | 32.91 | 31.57 | 28.96 | 26.35 |
| 8314 | 36.81 | 32.88 | 31.54 | 28.92 | 26.31 |
| 8316 | 36.84 | 32.91 | 31.55 | 28.94 | 26.35 |
| 8318 | 36.84 | 32.89 | 31.55 | 28.95 | 26.37 |
| 8320 | 36.79 | 32.84 | 31.5  | 28.91 | 26.33 |
| 8322 | 36.77 | 32.81 | 31.47 | 28.88 | 26.31 |
| 8324 | 36.75 | 32.81 | 31.46 | 28.87 | 26.3  |
| 8326 | 36.73 | 32.79 | 31.44 | 28.85 | 26.3  |
| 8328 | 36.73 | 32.8  | 31.45 | 28.87 | 26.3  |
| 8330 | 36.69 | 32.75 | 31.41 | 28.84 | 26.28 |
| 8332 | 36.69 | 32.75 | 31.41 | 28.86 | 26.29 |
| 8334 | 36.69 | 32.75 | 31.4  | 28.84 | 26.28 |
| 8336 | 36.69 | 32.76 | 31.4  | 28.85 | 26.3  |
| 8338 | 36.64 | 32.72 | 31.38 | 28.82 | 26.27 |
| 8340 | 36.63 | 32.71 | 31.35 | 28.8  | 26.28 |
| 8342 | 36.65 | 32.72 | 31.37 | 28.82 | 26.29 |
| 8344 | 36.62 | 32.72 | 31.36 | 28.8  | 26.27 |
| 8346 | 36.59 | 32.68 | 31.33 | 28.79 | 26.26 |
| 8348 | 36.6  | 32.68 | 31.33 | 28.78 | 26.28 |
| 8350 | 36.57 | 32.67 | 31.31 | 28.76 | 26.27 |
| 8352 | 36.54 | 32.63 | 31.28 | 28.73 | 26.23 |
| 8354 | 36.54 | 32.62 | 31.27 | 28.73 | 26.24 |
| 8356 | 36.53 | 32.63 | 31.27 | 28.74 | 26.25 |
| 8358 | 36.51 | 32.61 | 31.26 | 28.73 | 26.24 |
| 8360 | 36.48 | 32.57 | 31.22 | 28.69 | 26.21 |
| 8362 | 36.46 | 32.55 | 31.19 | 28.66 | 26.2  |
| 8364 | 36.48 | 32.57 | 31.21 | 28.7  | 26.22 |
| 8366 | 36.46 | 32.56 | 31.21 | 28.7  | 26.22 |
| 8368 | 36.43 | 32.55 | 31.19 | 28.69 | 26.21 |
| 8370 | 36.41 | 32.5  | 31.15 | 28.64 | 26.17 |
| 8372 | 36.37 | 32.48 | 31.12 | 28.61 | 26.17 |
| 8374 | 36.37 | 32.49 | 31.13 | 28.64 | 26.17 |
| 8376 | 36.36 | 32.49 | 31.13 | 28.64 | 26.16 |
| 8378 | 36.33 | 32.45 | 31.1  | 28.59 | 26.15 |
| 8380 | 36.31 | 32.44 | 31.07 | 28.57 | 26.14 |

|      |       |       |       |       |       |
|------|-------|-------|-------|-------|-------|
| 8382 | 36.27 | 32.39 | 31.03 | 28.53 | 26.11 |
| 8384 | 36.26 | 32.39 | 31.03 | 28.53 | 26.11 |
| 8386 | 36.25 | 32.37 | 31.02 | 28.53 | 26.12 |
| 8388 | 36.23 | 32.36 | 31    | 28.52 | 26.1  |
| 8390 | 36.22 | 32.35 | 30.97 | 28.5  | 26.09 |
| 8392 | 36.23 | 32.36 | 30.99 | 28.52 | 26.12 |
| 8394 | 36.23 | 32.36 | 31    | 28.53 | 26.14 |
| 8396 | 36.2  | 32.33 | 30.95 | 28.49 | 26.09 |
| 8398 | 36.17 | 32.29 | 30.92 | 28.47 | 26.08 |
| 8400 | 36.15 | 32.28 | 30.92 | 28.47 | 26.07 |
| 8402 | 36.17 | 32.31 | 30.94 | 28.49 | 26.09 |
| 8404 | 36.15 | 32.28 | 30.92 | 28.47 | 26.09 |
| 8406 | 36.12 | 32.26 | 30.89 | 28.45 | 26.06 |
| 8408 | 36.1  | 32.23 | 30.86 | 28.42 | 26.03 |
| 8410 | 36.11 | 32.26 | 30.89 | 28.45 | 26.07 |
| 8412 | 36.1  | 32.25 | 30.87 | 28.42 | 26.07 |
| 8414 | 36.04 | 32.18 | 30.81 | 28.38 | 26.03 |
| 8416 | 36.05 | 32.2  | 30.83 | 28.38 | 26.04 |
| 8418 | 36.02 | 32.17 | 30.8  | 28.37 | 26.01 |
| 8420 | 36    | 32.16 | 30.79 | 28.35 | 26.02 |
| 8422 | 36.01 | 32.17 | 30.8  | 28.38 | 26.04 |
| 8424 | 35.98 | 32.16 | 30.78 | 28.36 | 26.03 |
| 8426 | 35.96 | 32.13 | 30.76 | 28.34 | 26.02 |
| 8428 | 35.93 | 32.08 | 30.71 | 28.29 | 25.99 |
| 8430 | 35.95 | 32.12 | 30.75 | 28.34 | 26.01 |
| 8432 | 35.93 | 32.1  | 30.73 | 28.32 | 26    |
| 8434 | 35.91 | 32.08 | 30.71 | 28.32 | 26    |
| 8436 | 35.89 | 32.06 | 30.68 | 28.29 | 25.97 |
| 8438 | 35.87 | 32.03 | 30.67 | 28.29 | 25.96 |
| 8440 | 35.85 | 32.03 | 30.65 | 28.28 | 25.96 |
| 8442 | 35.87 | 32.05 | 30.66 | 28.28 | 25.98 |
| 8444 | 35.82 | 32    | 30.62 | 28.24 | 25.94 |
| 8446 | 35.84 | 32.02 | 30.65 | 28.27 | 25.97 |
| 8448 | 35.79 | 31.97 | 30.6  | 28.24 | 25.94 |
| 8450 | 35.75 | 31.94 | 30.56 | 28.2  | 25.9  |
| 8452 | 35.73 | 31.92 | 30.54 | 28.18 | 25.9  |
| 8454 | 35.71 | 31.9  | 30.54 | 28.17 | 25.91 |
| 8456 | 35.72 | 31.91 | 30.54 | 28.17 | 25.91 |
| 8458 | 35.72 | 31.92 | 30.54 | 28.18 | 25.93 |
| 8460 | 35.74 | 31.93 | 30.55 | 28.19 | 25.94 |
| 8462 | 35.69 | 31.9  | 30.52 | 28.16 | 25.91 |
| 8464 | 35.64 | 31.84 | 30.47 | 28.11 | 25.87 |
| 8466 | 35.64 | 31.85 | 30.48 | 28.12 | 25.88 |
| 8468 | 35.61 | 31.82 | 30.45 | 28.1  | 25.86 |

|      |       |       |       |       |       |
|------|-------|-------|-------|-------|-------|
| 8470 | 35.66 | 31.87 | 30.49 | 28.15 | 25.91 |
| 8472 | 35.61 | 31.83 | 30.45 | 28.12 | 25.87 |
| 8474 | 35.6  | 31.8  | 30.44 | 28.11 | 25.86 |
| 8476 | 35.58 | 31.79 | 30.4  | 28.08 | 25.85 |
| 8478 | 35.55 | 31.76 | 30.38 | 28.06 | 25.83 |
| 8480 | 35.55 | 31.76 | 30.38 | 28.06 | 25.83 |
| 8482 | 35.52 | 31.73 | 30.36 | 28.05 | 25.82 |
| 8484 | 35.5  | 31.72 | 30.34 | 28.03 | 25.81 |
| 8486 | 35.47 | 31.69 | 30.31 | 28    | 25.79 |
| 8488 | 35.43 | 31.65 | 30.28 | 27.97 | 25.78 |
| 8490 | 35.45 | 31.68 | 30.3  | 27.98 | 25.8  |
| 8492 | 35.41 | 31.63 | 30.25 | 27.94 | 25.76 |
| 8494 | 35.41 | 31.64 | 30.26 | 27.95 | 25.78 |
| 8496 | 35.43 | 31.67 | 30.27 | 27.97 | 25.79 |
| 8498 | 35.4  | 31.63 | 30.25 | 27.95 | 25.77 |
| 8500 | 35.4  | 31.63 | 30.26 | 27.97 | 25.81 |
| 8502 | 35.37 | 31.61 | 30.23 | 27.94 | 25.78 |
| 8504 | 35.37 | 31.6  | 30.21 | 27.95 | 25.78 |
| 8506 | 35.36 | 31.6  | 30.21 | 27.94 | 25.76 |
| 8508 | 35.32 | 31.56 | 30.18 | 27.91 | 25.74 |
| 8510 | 35.31 | 31.55 | 30.17 | 27.91 | 25.75 |
| 8512 | 35.29 | 31.55 | 30.16 | 27.89 | 25.74 |
| 8514 | 35.28 | 31.54 | 30.15 | 27.88 | 25.73 |
| 8516 | 35.27 | 31.53 | 30.14 | 27.87 | 25.73 |
| 8518 | 35.26 | 31.52 | 30.13 | 27.86 | 25.72 |
| 8520 | 35.24 | 31.5  | 30.12 | 27.86 | 25.72 |
| 8522 | 35.23 | 31.48 | 30.11 | 27.85 | 25.72 |
| 8524 | 35.21 | 31.48 | 30.09 | 27.84 | 25.71 |
| 8526 | 35.21 | 31.48 | 30.1  | 27.85 | 25.73 |
| 8528 | 35.2  | 31.47 | 30.08 | 27.84 | 25.72 |
| 8530 | 35.16 | 31.44 | 30.05 | 27.81 | 25.69 |
| 8532 | 35.11 | 31.4  | 30.01 | 27.77 | 25.66 |
| 8534 | 35.12 | 31.4  | 30.02 | 27.78 | 25.66 |
| 8536 | 35.12 | 31.41 | 30.01 | 27.78 | 25.66 |
| 8538 | 35.11 | 31.39 | 30.01 | 27.78 | 25.67 |
| 8540 | 35.1  | 31.38 | 30    | 27.76 | 25.67 |
| 8542 | 35.08 | 31.37 | 29.99 | 27.77 | 25.67 |
| 8544 | 35.06 | 31.35 | 29.97 | 27.74 | 25.65 |
| 8546 | 35.06 | 31.35 | 29.96 | 27.75 | 25.66 |
| 8548 | 35.02 | 31.31 | 29.94 | 27.73 | 25.65 |
| 8550 | 35.02 | 31.32 | 29.93 | 27.72 | 25.64 |
| 8552 | 35.01 | 31.31 | 29.92 | 27.71 | 25.64 |
| 8554 | 35.01 | 31.33 | 29.93 | 27.72 | 25.66 |
| 8556 | 35.03 | 31.33 | 29.93 | 27.72 | 25.68 |

|      |       |       |       |       |       |
|------|-------|-------|-------|-------|-------|
| 8558 | 34.97 | 31.28 | 29.88 | 27.68 | 25.64 |
| 8560 | 34.96 | 31.29 | 29.89 | 27.69 | 25.66 |
| 8562 | 34.97 | 31.28 | 29.89 | 27.7  | 25.66 |
| 8564 | 34.95 | 31.25 | 29.86 | 27.67 | 25.63 |
| 8566 | 34.92 | 31.24 | 29.84 | 27.66 | 25.61 |
| 8568 | 34.92 | 31.24 | 29.84 | 27.66 | 25.61 |
| 8570 | 34.88 | 31.19 | 29.81 | 27.63 | 25.58 |
| 8572 | 34.89 | 31.21 | 29.82 | 27.64 | 25.61 |
| 8574 | 34.86 | 31.19 | 29.79 | 27.63 | 25.59 |
| 8576 | 34.85 | 31.17 | 29.77 | 27.6  | 25.58 |
| 8578 | 34.83 | 31.16 | 29.77 | 27.6  | 25.58 |
| 8580 | 34.82 | 31.15 | 29.76 | 27.6  | 25.58 |
| 8582 | 34.81 | 31.14 | 29.75 | 27.59 | 25.58 |
| 8584 | 34.76 | 31.1  | 29.7  | 27.54 | 25.54 |
| 8586 | 34.77 | 31.11 | 29.71 | 27.56 | 25.55 |
| 8588 | 34.77 | 31.11 | 29.71 | 27.57 | 25.56 |
| 8590 | 34.76 | 31.1  | 29.7  | 27.56 | 25.56 |
| 8592 | 34.74 | 31.09 | 29.69 | 27.55 | 25.56 |
| 8594 | 34.72 | 31.07 | 29.67 | 27.54 | 25.55 |
| 8596 | 34.71 | 31.06 | 29.66 | 27.52 | 25.54 |
| 8598 | 34.69 | 31.04 | 29.64 | 27.51 | 25.52 |
| 8600 | 34.69 | 31.04 | 29.64 | 27.51 | 25.53 |
| 8602 | 34.67 | 31.03 | 29.64 | 27.51 | 25.52 |
| 8604 | 34.66 | 31.02 | 29.62 | 27.49 | 25.52 |
| 8606 | 34.64 | 31    | 29.61 | 27.48 | 25.52 |
| 8608 | 34.63 | 30.99 | 29.59 | 27.46 | 25.52 |
| 8610 | 34.61 | 30.98 | 29.58 | 27.46 | 25.51 |
| 8612 | 34.59 | 30.95 | 29.56 | 27.45 | 25.5  |
| 8614 | 34.61 | 30.98 | 29.59 | 27.47 | 25.52 |
| 8616 | 34.6  | 30.97 | 29.55 | 27.45 | 25.51 |
| 8618 | 34.59 | 30.96 | 29.57 | 27.46 | 25.52 |
| 8620 | 34.56 | 30.92 | 29.52 | 27.43 | 25.49 |
| 8622 | 34.53 | 30.91 | 29.52 | 27.42 | 25.48 |
| 8624 | 34.53 | 30.91 | 29.51 | 27.42 | 25.48 |
| 8626 | 34.54 | 30.92 | 29.51 | 27.42 | 25.49 |
| 8628 | 34.5  | 30.89 | 29.49 | 27.4  | 25.47 |
| 8630 | 34.5  | 30.88 | 29.48 | 27.4  | 25.47 |
| 8632 | 34.48 | 30.86 | 29.46 | 27.38 | 25.46 |
| 8634 | 34.46 | 30.86 | 29.46 | 27.39 | 25.47 |
| 8636 | 34.45 | 30.84 | 29.44 | 27.37 | 25.45 |
| 8638 | 34.4  | 30.8  | 29.4  | 27.32 | 25.42 |
| 8640 | 34.4  | 30.8  | 29.4  | 27.32 | 25.43 |
| 8642 | 34.4  | 30.8  | 29.4  | 27.32 | 25.43 |
| 8644 | 34.38 | 30.79 | 29.39 | 27.32 | 25.43 |

|      |       |       |       |       |       |
|------|-------|-------|-------|-------|-------|
| 8646 | 34.35 | 30.76 | 29.36 | 27.28 | 25.38 |
| 8648 | 34.34 | 30.74 | 29.34 | 27.28 | 25.38 |
| 8650 | 34.34 | 30.75 | 29.35 | 27.29 | 25.41 |
| 8652 | 34.33 | 30.74 | 29.34 | 27.29 | 25.41 |
| 8654 | 34.32 | 30.73 | 29.33 | 27.28 | 25.41 |
| 8656 | 34.29 | 30.69 | 29.29 | 27.25 | 25.38 |
| 8658 | 34.28 | 30.7  | 29.3  | 27.26 | 25.39 |
| 8660 | 34.28 | 30.71 | 29.3  | 27.27 | 25.39 |
| 8662 | 34.28 | 30.69 | 29.29 | 27.26 | 25.39 |
| 8664 | 34.25 | 30.67 | 29.26 | 27.23 | 25.37 |
| 8666 | 34.2  | 30.64 | 29.23 | 27.19 | 25.33 |
| 8668 | 34.22 | 30.66 | 29.25 | 27.23 | 25.37 |
| 8670 | 34.22 | 30.66 | 29.25 | 27.23 | 25.36 |
| 8672 | 34.2  | 30.65 | 29.24 | 27.21 | 25.36 |
| 8674 | 34.18 | 30.62 | 29.23 | 27.2  | 25.36 |
| 8676 | 34.16 | 30.58 | 29.18 | 27.17 | 25.35 |
| 8678 | 34.14 | 30.59 | 29.18 | 27.16 | 25.33 |
| 8680 | 34.13 | 30.59 | 29.17 | 27.17 | 25.34 |
| 8682 | 34.13 | 30.58 | 29.17 | 27.16 | 25.34 |
| 8684 | 34.12 | 30.57 | 29.16 | 27.16 | 25.34 |
| 8686 | 34.11 | 30.56 | 29.16 | 27.16 | 25.33 |
| 8688 | 34.07 | 30.52 | 29.12 | 27.13 | 25.3  |
| 8690 | 34.07 | 30.52 | 29.11 | 27.12 | 25.29 |
| 8692 | 34.06 | 30.52 | 29.11 | 27.14 | 25.32 |
| 8694 | 34.08 | 30.53 | 29.13 | 27.14 | 25.33 |
| 8696 | 34.05 | 30.51 | 29.11 | 27.13 | 25.31 |
| 8698 | 34.04 | 30.5  | 29.1  | 27.12 | 25.3  |
| 8700 | 34.02 | 30.49 | 29.09 | 27.12 | 25.31 |
| 8702 | 34    | 30.48 | 29.08 | 27.1  | 25.3  |
| 8704 | 33.99 | 30.47 | 29.07 | 27.09 | 25.3  |
| 8706 | 33.97 | 30.46 | 29.05 | 27.07 | 25.29 |
| 8708 | 33.97 | 30.45 | 29.04 | 27.07 | 25.3  |
| 8710 | 33.93 | 30.42 | 29    | 27.06 | 25.27 |
| 8712 | 33.92 | 30.41 | 29.01 | 27.04 | 25.26 |
| 8714 | 33.91 | 30.4  | 28.99 | 27.01 | 25.24 |

|           |    |       |       |       |       |       |
|-----------|----|-------|-------|-------|-------|-------|
| 80kg435C° | 0  | 21.98 | 22.06 | 22.12 | 22.31 | 22.16 |
|           | 2  | 21.98 | 22.06 | 22.13 | 22.31 | 22.17 |
|           | 4  | 21.97 | 22.07 | 22.13 | 22.32 | 22.18 |
|           | 6  | 21.98 | 22.08 | 22.14 | 22.34 | 22.19 |
|           | 8  | 21.98 | 22.09 | 22.15 | 22.36 | 22.19 |
|           | 10 | 22.03 | 22.14 | 22.21 | 22.4  | 22.25 |
|           | 12 | 22.01 | 22.13 | 22.21 | 22.41 | 22.25 |
|           | 14 | 22.04 | 22.17 | 22.24 | 22.45 | 22.29 |



|     |       |       |       |       |       |
|-----|-------|-------|-------|-------|-------|
| 16  | 22.01 | 22.14 | 22.22 | 22.43 | 22.26 |
| 18  | 22.03 | 22.17 | 22.24 | 22.45 | 22.27 |
| 20  | 22.02 | 22.17 | 22.24 | 22.45 | 22.26 |
| 22  | 22.05 | 22.2  | 22.28 | 22.5  | 22.31 |
| 24  | 22.01 | 22.18 | 22.25 | 22.48 | 22.28 |
| 26  | 22.03 | 22.2  | 22.28 | 22.49 | 22.29 |
| 28  | 22.06 | 22.22 | 22.29 | 22.52 | 22.31 |
| 30  | 22.02 | 22.21 | 22.29 | 22.5  | 22.31 |
| 32  | 22.03 | 22.2  | 22.29 | 22.5  | 22.32 |
| 34  | 22.01 | 22.2  | 22.29 | 22.49 | 22.3  |
| 36  | 22.03 | 22.23 | 22.32 | 22.54 | 22.35 |
| 38  | 22.02 | 22.24 | 22.3  | 22.53 | 22.32 |
| 40  | 22.01 | 22.21 | 22.29 | 22.51 | 22.31 |
| 42  | 22.04 | 22.26 | 22.36 | 22.56 | 22.38 |
| 44  | 22.03 | 22.25 | 22.35 | 22.56 | 22.36 |
| 46  | 22.03 | 22.26 | 22.34 | 22.57 | 22.37 |
| 48  | 22.06 | 22.28 | 22.36 | 22.6  | 22.38 |
| 50  | 22.06 | 22.31 | 22.4  | 22.62 | 22.4  |
| 52  | 22.08 | 22.33 | 22.41 | 22.64 | 22.41 |
| 54  | 22.06 | 22.29 | 22.41 | 22.63 | 22.4  |
| 56  | 22.08 | 22.31 | 22.42 | 22.64 | 22.41 |
| 58  | 22.08 | 22.33 | 22.42 | 22.64 | 22.42 |
| 60  | 22.07 | 22.33 | 22.43 | 22.64 | 22.43 |
| 62  | 22.03 | 22.29 | 22.39 | 22.62 | 22.4  |
| 64  | 22.07 | 22.34 | 22.42 | 22.65 | 22.42 |
| 66  | 22.08 | 22.34 | 22.44 | 22.67 | 22.44 |
| 68  | 22.08 | 22.35 | 22.45 | 22.67 | 22.44 |
| 70  | 22.09 | 22.35 | 22.45 | 22.67 | 22.45 |
| 72  | 22.1  | 22.36 | 22.46 | 22.69 | 22.45 |
| 74  | 22.12 | 22.37 | 22.48 | 22.7  | 22.46 |
| 76  | 22.14 | 22.38 | 22.49 | 22.71 | 22.47 |
| 78  | 22.17 | 22.41 | 22.52 | 22.76 | 22.5  |
| 80  | 22.22 | 22.45 | 22.57 | 22.79 | 22.54 |
| 82  | 22.19 | 22.41 | 22.52 | 22.75 | 22.5  |
| 84  | 22.18 | 22.4  | 22.51 | 22.74 | 22.47 |
| 86  | 22.22 | 22.45 | 22.56 | 22.78 | 22.52 |
| 88  | 22.23 | 22.45 | 22.56 | 22.79 | 22.55 |
| 90  | 22.26 | 22.45 | 22.57 | 22.79 | 22.54 |
| 92  | 22.24 | 22.45 | 22.55 | 22.77 | 22.53 |
| 94  | 22.26 | 22.44 | 22.54 | 22.76 | 22.51 |
| 96  | 22.3  | 22.46 | 22.57 | 22.78 | 22.53 |
| 98  | 22.3  | 22.45 | 22.58 | 22.79 | 22.54 |
| 100 | 22.37 | 22.49 | 22.61 | 22.83 | 22.57 |
| 102 | 22.4  | 22.5  | 22.62 | 22.85 | 22.57 |

|     |       |       |       |       |       |
|-----|-------|-------|-------|-------|-------|
| 104 | 22.44 | 22.51 | 22.63 | 22.86 | 22.58 |
| 106 | 22.46 | 22.51 | 22.64 | 22.86 | 22.58 |
| 108 | 22.48 | 22.52 | 22.64 | 22.87 | 22.58 |
| 110 | 22.48 | 22.49 | 22.61 | 22.83 | 22.55 |
| 112 | 22.52 | 22.5  | 22.64 | 22.86 | 22.57 |
| 114 | 22.56 | 22.53 | 22.64 | 22.86 | 22.58 |
| 116 | 22.58 | 22.52 | 22.65 | 22.87 | 22.59 |
| 118 | 22.63 | 22.54 | 22.68 | 22.89 | 22.62 |
| 120 | 22.66 | 22.53 | 22.68 | 22.89 | 22.61 |
| 122 | 22.72 | 22.58 | 22.69 | 22.91 | 22.62 |
| 124 | 22.76 | 22.58 | 22.7  | 22.92 | 22.63 |
| 126 | 22.82 | 22.61 | 22.73 | 22.95 | 22.66 |
| 128 | 22.84 | 22.58 | 22.72 | 22.93 | 22.64 |
| 130 | 22.9  | 22.6  | 22.73 | 22.96 | 22.63 |
| 132 | 22.93 | 22.58 | 22.7  | 22.93 | 22.6  |
| 134 | 23.01 | 22.62 | 22.74 | 22.98 | 22.67 |
| 136 | 23.06 | 22.64 | 22.77 | 22.99 | 22.66 |
| 138 | 23.07 | 22.6  | 22.71 | 22.93 | 22.62 |
| 140 | 23.17 | 22.64 | 22.76 | 22.98 | 22.66 |
| 142 | 23.19 | 22.61 | 22.74 | 22.97 | 22.66 |
| 144 | 23.25 | 22.64 | 22.77 | 22.98 | 22.68 |
| 146 | 23.31 | 22.65 | 22.77 | 22.98 | 22.68 |
| 148 | 23.37 | 22.65 | 22.78 | 22.97 | 22.67 |
| 150 | 23.41 | 22.63 | 22.77 | 22.97 | 22.67 |
| 152 | 23.5  | 22.65 | 22.79 | 23    | 22.68 |
| 154 | 23.56 | 22.65 | 22.79 | 23    | 22.69 |
| 156 | 23.63 | 22.65 | 22.79 | 23    | 22.69 |
| 158 | 23.69 | 22.67 | 22.79 | 23.01 | 22.68 |
| 160 | 23.79 | 22.67 | 22.81 | 23.02 | 22.7  |
| 162 | 23.86 | 22.68 | 22.82 | 23.03 | 22.7  |
| 164 | 23.91 | 22.67 | 22.81 | 23.02 | 22.69 |
| 166 | 24    | 22.68 | 22.82 | 23.03 | 22.7  |
| 168 | 24.08 | 22.68 | 22.83 | 23.04 | 22.7  |
| 170 | 24.15 | 22.68 | 22.82 | 23.03 | 22.7  |
| 172 | 24.24 | 22.7  | 22.85 | 23.05 | 22.74 |
| 174 | 24.32 | 22.7  | 22.84 | 23.04 | 22.72 |
| 176 | 24.41 | 22.69 | 22.83 | 23.04 | 22.73 |
| 178 | 24.49 | 22.69 | 22.83 | 23.04 | 22.71 |
| 180 | 24.56 | 22.69 | 22.83 | 23.03 | 22.71 |
| 182 | 24.65 | 22.69 | 22.84 | 23.04 | 22.7  |
| 184 | 24.82 | 22.75 | 22.88 | 23.09 | 22.75 |
| 186 | 24.88 | 22.72 | 22.87 | 23.08 | 22.73 |
| 188 | 24.99 | 22.74 | 22.88 | 23.08 | 22.73 |
| 190 | 25.06 | 22.72 | 22.87 | 23.07 | 22.72 |

|     |       |       |       |       |       |
|-----|-------|-------|-------|-------|-------|
| 192 | 25.21 | 22.76 | 22.9  | 23.11 | 22.76 |
| 194 | 25.32 | 22.77 | 22.92 | 23.12 | 22.77 |
| 196 | 25.42 | 22.79 | 22.92 | 23.12 | 22.78 |
| 198 | 25.49 | 22.76 | 22.9  | 23.09 | 22.77 |
| 200 | 25.61 | 22.78 | 22.91 | 23.1  | 22.77 |
| 202 | 25.69 | 22.72 | 22.87 | 23.06 | 22.73 |
| 204 | 25.8  | 22.73 | 22.88 | 23.06 | 22.74 |
| 206 | 25.92 | 22.73 | 22.89 | 23.08 | 22.75 |
| 208 | 26.08 | 22.78 | 22.91 | 23.11 | 22.78 |
| 210 | 26.21 | 22.78 | 22.93 | 23.12 | 22.78 |
| 212 | 26.34 | 22.79 | 22.93 | 23.14 | 22.78 |
| 214 | 26.5  | 22.8  | 22.95 | 23.15 | 22.79 |
| 216 | 26.61 | 22.79 | 22.93 | 23.12 | 22.77 |
| 218 | 26.73 | 22.79 | 22.92 | 23.12 | 22.77 |
| 220 | 26.85 | 22.8  | 22.92 | 23.14 | 22.78 |
| 222 | 27    | 22.81 | 22.94 | 23.15 | 22.78 |
| 224 | 27.11 | 22.78 | 22.92 | 23.11 | 22.76 |
| 226 | 27.25 | 22.79 | 22.93 | 23.12 | 22.77 |
| 228 | 27.39 | 22.8  | 22.94 | 23.12 | 22.77 |
| 230 | 27.53 | 22.8  | 22.93 | 23.12 | 22.77 |
| 232 | 27.67 | 22.79 | 22.91 | 23.1  | 22.75 |
| 234 | 27.81 | 22.8  | 22.92 | 23.1  | 22.77 |
| 236 | 27.98 | 22.83 | 22.94 | 23.13 | 22.79 |
| 238 | 28.13 | 22.84 | 22.96 | 23.15 | 22.79 |
| 240 | 28.34 | 22.88 | 23    | 23.2  | 22.82 |
| 242 | 28.5  | 22.9  | 23.02 | 23.21 | 22.83 |
| 244 | 28.66 | 22.89 | 23    | 23.2  | 22.82 |
| 246 | 28.83 | 22.88 | 22.99 | 23.19 | 22.8  |
| 248 | 28.97 | 22.86 | 22.98 | 23.17 | 22.8  |
| 250 | 29.11 | 22.87 | 22.98 | 23.17 | 22.79 |
| 252 | 29.26 | 22.86 | 22.98 | 23.16 | 22.79 |
| 254 | 29.42 | 22.86 | 22.97 | 23.15 | 22.79 |
| 256 | 29.62 | 22.87 | 22.98 | 23.16 | 22.81 |
| 258 | 29.82 | 22.9  | 22.99 | 23.19 | 22.82 |
| 260 | 30    | 22.92 | 23.01 | 23.2  | 22.85 |
| 262 | 30.15 | 22.9  | 22.99 | 23.17 | 22.81 |
| 264 | 30.35 | 22.94 | 23.03 | 23.21 | 22.85 |
| 266 | 30.56 | 22.95 | 23.02 | 23.21 | 22.82 |
| 268 | 30.76 | 22.97 | 23.05 | 23.24 | 22.85 |
| 270 | 30.94 | 22.98 | 23.05 | 23.24 | 22.86 |
| 272 | 31.16 | 23    | 23.07 | 23.24 | 22.87 |
| 274 | 31.36 | 23.03 | 23.08 | 23.26 | 22.89 |
| 276 | 31.54 | 23.03 | 23.08 | 23.27 | 22.88 |
| 278 | 31.74 | 23.05 | 23.1  | 23.29 | 22.9  |

|     |       |       |       |       |       |
|-----|-------|-------|-------|-------|-------|
| 280 | 31.92 | 23.03 | 23.07 | 23.26 | 22.88 |
| 282 | 32.08 | 23.01 | 23.05 | 23.23 | 22.86 |
| 284 | 32.28 | 23.02 | 23.06 | 23.24 | 22.87 |
| 286 | 32.48 | 23.02 | 23.06 | 23.23 | 22.86 |
| 288 | 32.75 | 23.07 | 23.11 | 23.28 | 22.89 |
| 290 | 32.95 | 23.08 | 23.1  | 23.28 | 22.91 |
| 292 | 33.13 | 23.07 | 23.09 | 23.25 | 22.88 |
| 294 | 33.35 | 23.07 | 23.08 | 23.26 | 22.87 |
| 296 | 33.59 | 23.07 | 23.08 | 23.25 | 22.87 |
| 298 | 33.8  | 23.07 | 23.07 | 23.25 | 22.86 |
| 300 | 34.03 | 23.09 | 23.08 | 23.26 | 22.87 |
| 302 | 34.28 | 23.13 | 23.1  | 23.29 | 22.9  |
| 304 | 34.47 | 23.11 | 23.09 | 23.27 | 22.87 |
| 306 | 34.67 | 23.12 | 23.08 | 23.25 | 22.87 |
| 308 | 34.88 | 23.12 | 23.08 | 23.23 | 22.86 |
| 310 | 35.12 | 23.14 | 23.09 | 23.24 | 22.87 |
| 312 | 35.39 | 23.19 | 23.12 | 23.29 | 22.91 |
| 314 | 35.6  | 23.18 | 23.11 | 23.26 | 22.89 |
| 316 | 35.8  | 23.16 | 23.08 | 23.24 | 22.87 |
| 318 | 36.06 | 23.21 | 23.11 | 23.28 | 22.9  |
| 320 | 36.34 | 23.23 | 23.12 | 23.3  | 22.91 |
| 322 | 36.56 | 23.23 | 23.12 | 23.29 | 22.91 |
| 324 | 36.79 | 23.24 | 23.11 | 23.29 | 22.89 |
| 326 | 37.01 | 23.24 | 23.09 | 23.26 | 22.87 |
| 328 | 37.3  | 23.26 | 23.1  | 23.28 | 22.89 |
| 330 | 37.52 | 23.28 | 23.11 | 23.28 | 22.88 |
| 332 | 37.76 | 23.29 | 23.11 | 23.28 | 22.88 |
| 334 | 37.98 | 23.3  | 23.11 | 23.26 | 22.87 |
| 336 | 38.28 | 23.32 | 23.12 | 23.28 | 22.89 |
| 338 | 38.52 | 23.34 | 23.12 | 23.3  | 22.91 |
| 340 | 38.77 | 23.37 | 23.14 | 23.3  | 22.91 |
| 342 | 39.07 | 23.39 | 23.14 | 23.3  | 22.91 |
| 344 | 39.29 | 23.39 | 23.12 | 23.28 | 22.9  |
| 346 | 39.56 | 23.44 | 23.17 | 23.32 | 22.93 |
| 348 | 39.82 | 23.46 | 23.17 | 23.33 | 22.93 |
| 350 | 40.11 | 23.47 | 23.17 | 23.33 | 22.93 |
| 352 | 40.36 | 23.51 | 23.18 | 23.34 | 22.94 |
| 354 | 40.6  | 23.53 | 23.19 | 23.33 | 22.94 |
| 356 | 40.85 | 23.55 | 23.19 | 23.33 | 22.94 |
| 358 | 41.09 | 23.55 | 23.16 | 23.32 | 22.92 |
| 360 | 41.39 | 23.58 | 23.18 | 23.33 | 22.94 |
| 362 | 41.61 | 23.59 | 23.17 | 23.31 | 22.93 |
| 364 | 41.86 | 23.6  | 23.17 | 23.31 | 22.93 |
| 366 | 42.12 | 23.64 | 23.19 | 23.33 | 22.94 |

|     |       |       |       |       |       |
|-----|-------|-------|-------|-------|-------|
| 368 | 42.42 | 23.67 | 23.19 | 23.33 | 22.94 |
| 370 | 42.67 | 23.69 | 23.19 | 23.32 | 22.94 |
| 372 | 42.92 | 23.7  | 23.19 | 23.32 | 22.95 |
| 374 | 43.18 | 23.73 | 23.19 | 23.32 | 22.95 |
| 376 | 43.49 | 23.77 | 23.21 | 23.35 | 22.95 |
| 378 | 43.74 | 23.8  | 23.21 | 23.35 | 22.95 |
| 380 | 43.99 | 23.81 | 23.2  | 23.34 | 22.94 |
| 382 | 44.25 | 23.84 | 23.21 | 23.35 | 22.95 |
| 384 | 44.56 | 23.87 | 23.21 | 23.34 | 22.95 |
| 386 | 44.8  | 23.9  | 23.22 | 23.35 | 22.95 |
| 388 | 45.06 | 23.94 | 23.23 | 23.36 | 22.96 |
| 390 | 45.36 | 23.97 | 23.26 | 23.38 | 22.99 |
| 392 | 45.6  | 24    | 23.24 | 23.36 | 22.99 |
| 394 | 45.88 | 24.03 | 23.26 | 23.37 | 22.99 |
| 396 | 46.14 | 24.07 | 23.25 | 23.37 | 22.99 |
| 398 | 46.39 | 24.08 | 23.25 | 23.36 | 22.98 |
| 400 | 46.68 | 24.12 | 23.25 | 23.36 | 22.99 |
| 402 | 46.95 | 24.16 | 23.26 | 23.37 | 22.99 |
| 404 | 47.22 | 24.2  | 23.28 | 23.38 | 22.99 |
| 406 | 47.45 | 24.21 | 23.26 | 23.37 | 22.97 |
| 408 | 47.73 | 24.28 | 23.29 | 23.4  | 22.99 |
| 410 | 48.04 | 24.33 | 23.31 | 23.41 | 23.01 |
| 412 | 48.29 | 24.35 | 23.3  | 23.4  | 23.01 |
| 414 | 48.56 | 24.41 | 23.32 | 23.42 | 23.02 |
| 416 | 48.8  | 24.4  | 23.29 | 23.38 | 22.99 |
| 418 | 49.06 | 24.43 | 23.28 | 23.37 | 22.99 |
| 420 | 49.31 | 24.47 | 23.3  | 23.36 | 22.99 |
| 422 | 49.58 | 24.5  | 23.29 | 23.36 | 22.99 |
| 424 | 49.91 | 24.56 | 23.31 | 23.38 | 23    |
| 426 | 50.17 | 24.61 | 23.33 | 23.4  | 23.02 |
| 428 | 50.42 | 24.65 | 23.32 | 23.39 | 23.02 |
| 430 | 50.68 | 24.68 | 23.33 | 23.39 | 23.01 |
| 432 | 50.99 | 24.72 | 23.34 | 23.4  | 23.01 |
| 434 | 51.22 | 24.75 | 23.32 | 23.38 | 23.01 |
| 436 | 51.52 | 24.82 | 23.37 | 23.42 | 23.04 |
| 438 | 51.78 | 24.87 | 23.37 | 23.43 | 23.04 |
| 440 | 52.1  | 24.94 | 23.4  | 23.45 | 23.08 |
| 442 | 52.34 | 24.99 | 23.41 | 23.45 | 23.08 |
| 444 | 52.59 | 25.03 | 23.41 | 23.44 | 23.05 |
| 446 | 52.86 | 25.08 | 23.43 | 23.46 | 23.09 |
| 448 | 53.18 | 25.13 | 23.42 | 23.45 | 23.09 |
| 450 | 53.43 | 25.19 | 23.44 | 23.45 | 23.09 |
| 452 | 53.7  | 25.24 | 23.45 | 23.46 | 23.1  |
| 454 | 53.95 | 25.29 | 23.46 | 23.47 | 23.1  |

|     |       |       |       |       |       |
|-----|-------|-------|-------|-------|-------|
| 456 | 54.24 | 25.34 | 23.45 | 23.46 | 23.1  |
| 458 | 54.51 | 25.4  | 23.47 | 23.46 | 23.11 |
| 460 | 54.78 | 25.46 | 23.48 | 23.48 | 23.12 |
| 462 | 55.05 | 25.51 | 23.49 | 23.49 | 23.12 |
| 464 | 55.36 | 25.57 | 23.51 | 23.5  | 23.12 |
| 466 | 55.62 | 25.63 | 23.52 | 23.49 | 23.12 |
| 468 | 55.89 | 25.68 | 23.52 | 23.5  | 23.13 |
| 470 | 56.14 | 25.69 | 23.49 | 23.45 | 23.08 |
| 472 | 56.43 | 25.77 | 23.5  | 23.47 | 23.1  |
| 474 | 56.68 | 25.81 | 23.51 | 23.47 | 23.09 |
| 476 | 56.94 | 25.86 | 23.51 | 23.46 | 23.1  |
| 478 | 57.2  | 25.92 | 23.5  | 23.45 | 23.08 |
| 480 | 57.51 | 26.02 | 23.55 | 23.48 | 23.13 |
| 482 | 57.75 | 26.05 | 23.53 | 23.46 | 23.1  |
| 484 | 58.04 | 26.13 | 23.55 | 23.47 | 23.11 |
| 486 | 58.29 | 26.19 | 23.57 | 23.48 | 23.12 |
| 488 | 58.56 | 26.22 | 23.53 | 23.45 | 23.09 |
| 490 | 58.84 | 26.31 | 23.56 | 23.45 | 23.09 |
| 492 | 59.12 | 26.38 | 23.58 | 23.47 | 23.11 |
| 494 | 59.37 | 26.41 | 23.55 | 23.44 | 23.09 |
| 496 | 59.72 | 26.5  | 23.58 | 23.47 | 23.1  |
| 498 | 59.98 | 26.58 | 23.6  | 23.48 | 23.11 |
| 500 | 60.26 | 26.67 | 23.62 | 23.49 | 23.14 |
| 502 | 60.51 | 26.74 | 23.63 | 23.48 | 23.12 |
| 504 | 60.81 | 26.8  | 23.62 | 23.48 | 23.12 |
| 506 | 61.11 | 26.91 | 23.66 | 23.51 | 23.16 |
| 508 | 61.36 | 26.95 | 23.65 | 23.5  | 23.14 |
| 510 | 61.69 | 27.05 | 23.69 | 23.52 | 23.16 |
| 512 | 61.93 | 27.09 | 23.65 | 23.48 | 23.12 |
| 514 | 62.19 | 27.14 | 23.67 | 23.47 | 23.12 |
| 516 | 62.46 | 27.25 | 23.7  | 23.49 | 23.14 |
| 518 | 62.73 | 27.31 | 23.69 | 23.49 | 23.14 |
| 520 | 63.03 | 27.42 | 23.74 | 23.53 | 23.18 |
| 522 | 63.36 | 27.52 | 23.77 | 23.54 | 23.19 |
| 524 | 63.62 | 27.58 | 23.78 | 23.55 | 23.19 |
| 526 | 63.9  | 27.65 | 23.77 | 23.53 | 23.17 |
| 528 | 64.2  | 27.73 | 23.79 | 23.53 | 23.19 |
| 530 | 64.46 | 27.82 | 23.81 | 23.53 | 23.19 |
| 532 | 64.74 | 27.91 | 23.82 | 23.54 | 23.21 |
| 534 | 65.03 | 28.01 | 23.86 | 23.55 | 23.22 |
| 536 | 65.33 | 28.06 | 23.86 | 23.54 | 23.21 |
| 538 | 65.62 | 28.17 | 23.88 | 23.56 | 23.23 |
| 540 | 65.89 | 28.24 | 23.89 | 23.56 | 23.22 |
| 542 | 66.17 | 28.32 | 23.9  | 23.56 | 23.22 |

|     |       |       |       |       |       |
|-----|-------|-------|-------|-------|-------|
| 544 | 66.52 | 28.44 | 23.95 | 23.61 | 23.27 |
| 546 | 66.76 | 28.5  | 23.93 | 23.57 | 23.24 |
| 548 | 67.03 | 28.58 | 23.94 | 23.57 | 23.23 |
| 550 | 67.31 | 28.66 | 23.96 | 23.57 | 23.24 |
| 552 | 67.63 | 28.76 | 23.97 | 23.58 | 23.24 |
| 554 | 67.88 | 28.83 | 23.97 | 23.56 | 23.22 |
| 556 | 68.16 | 28.92 | 23.98 | 23.56 | 23.22 |
| 558 | 68.46 | 29.01 | 24.02 | 23.58 | 23.25 |
| 560 | 68.77 | 29.12 | 24.03 | 23.58 | 23.25 |
| 562 | 69.08 | 29.22 | 24.07 | 23.63 | 23.29 |
| 564 | 69.39 | 29.34 | 24.12 | 23.65 | 23.32 |
| 566 | 69.66 | 29.43 | 24.13 | 23.64 | 23.31 |
| 568 | 69.98 | 29.52 | 24.15 | 23.65 | 23.32 |
| 570 | 70.26 | 29.64 | 24.18 | 23.66 | 23.34 |
| 572 | 70.53 | 29.7  | 24.18 | 23.64 | 23.31 |
| 574 | 70.78 | 29.78 | 24.18 | 23.63 | 23.32 |
| 576 | 71.11 | 29.9  | 24.21 | 23.64 | 23.31 |
| 578 | 71.4  | 30    | 24.24 | 23.66 | 23.33 |
| 580 | 71.68 | 30.09 | 24.26 | 23.66 | 23.34 |
| 582 | 71.96 | 30.18 | 24.27 | 23.66 | 23.35 |
| 584 | 72.3  | 30.3  | 24.31 | 23.67 | 23.36 |
| 586 | 72.59 | 30.41 | 24.35 | 23.69 | 23.38 |
| 588 | 72.83 | 30.48 | 24.33 | 23.68 | 23.37 |
| 590 | 73.1  | 30.57 | 24.35 | 23.69 | 23.37 |
| 592 | 73.45 | 30.69 | 24.4  | 23.72 | 23.38 |
| 594 | 73.72 | 30.77 | 24.4  | 23.7  | 23.38 |
| 596 | 74    | 30.86 | 24.43 | 23.71 | 23.38 |
| 598 | 74.27 | 30.93 | 24.43 | 23.71 | 23.38 |
| 600 | 74.62 | 31.09 | 24.5  | 23.73 | 23.42 |
| 602 | 74.9  | 31.18 | 24.51 | 23.73 | 23.41 |
| 604 | 75.18 | 31.27 | 24.52 | 23.73 | 23.42 |
| 606 | 75.45 | 31.35 | 24.53 | 23.73 | 23.41 |
| 608 | 75.78 | 31.44 | 24.55 | 23.73 | 23.42 |
| 610 | 76.06 | 31.56 | 24.58 | 23.74 | 23.44 |
| 612 | 76.34 | 31.66 | 24.61 | 23.76 | 23.44 |
| 614 | 76.64 | 31.79 | 24.66 | 23.79 | 23.46 |
| 616 | 76.95 | 31.87 | 24.67 | 23.79 | 23.46 |
| 618 | 77.23 | 31.98 | 24.7  | 23.78 | 23.45 |
| 620 | 77.5  | 32.07 | 24.7  | 23.79 | 23.44 |
| 622 | 77.77 | 32.15 | 24.71 | 23.78 | 23.44 |
| 624 | 78.09 | 32.26 | 24.75 | 23.8  | 23.45 |
| 626 | 78.37 | 32.34 | 24.76 | 23.78 | 23.45 |
| 628 | 78.66 | 32.44 | 24.79 | 23.78 | 23.46 |
| 630 | 79.02 | 32.57 | 24.85 | 23.83 | 23.5  |

|     |       |       |       |       |       |
|-----|-------|-------|-------|-------|-------|
| 632 | 79.25 | 32.64 | 24.83 | 23.8  | 23.46 |
| 634 | 79.54 | 32.77 | 24.87 | 23.82 | 23.49 |
| 636 | 79.84 | 32.89 | 24.92 | 23.85 | 23.52 |
| 638 | 80.12 | 32.98 | 24.94 | 23.85 | 23.52 |
| 640 | 80.45 | 33.09 | 24.97 | 23.85 | 23.52 |
| 642 | 80.73 | 33.2  | 24.99 | 23.86 | 23.53 |
| 644 | 81    | 33.29 | 25.01 | 23.85 | 23.53 |
| 646 | 81.32 | 33.37 | 25.03 | 23.85 | 23.54 |
| 648 | 81.58 | 33.5  | 25.05 | 23.85 | 23.55 |
| 650 | 81.86 | 33.6  | 25.09 | 23.86 | 23.55 |
| 652 | 82.14 | 33.69 | 25.1  | 23.86 | 23.54 |
| 654 | 82.43 | 33.8  | 25.13 | 23.87 | 23.56 |
| 656 | 82.74 | 33.88 | 25.14 | 23.85 | 23.54 |
| 658 | 83.02 | 33.98 | 25.13 | 23.83 | 23.53 |
| 660 | 83.3  | 34.08 | 25.17 | 23.85 | 23.55 |
| 662 | 83.6  | 34.2  | 25.23 | 23.89 | 23.57 |
| 664 | 83.93 | 34.3  | 25.25 | 23.9  | 23.58 |
| 666 | 84.22 | 34.41 | 25.28 | 23.9  | 23.56 |
| 668 | 84.5  | 34.52 | 25.32 | 23.93 | 23.58 |
| 670 | 84.79 | 34.63 | 25.35 | 23.93 | 23.6  |
| 672 | 85.12 | 34.72 | 25.37 | 23.93 | 23.61 |
| 674 | 85.39 | 34.83 | 25.4  | 23.94 | 23.61 |
| 676 | 85.65 | 34.91 | 25.4  | 23.92 | 23.59 |
| 678 | 86    | 35.02 | 25.45 | 23.94 | 23.62 |
| 680 | 86.3  | 35.15 | 25.49 | 23.97 | 23.63 |
| 682 | 86.57 | 35.23 | 25.5  | 23.94 | 23.64 |
| 684 | 86.84 | 35.32 | 25.53 | 23.95 | 23.64 |
| 686 | 87.13 | 35.44 | 25.56 | 23.97 | 23.66 |
| 688 | 87.44 | 35.53 | 25.58 | 23.96 | 23.64 |
| 690 | 87.71 | 35.62 | 25.6  | 23.96 | 23.65 |
| 692 | 88.01 | 35.73 | 25.64 | 23.98 | 23.66 |
| 694 | 88.3  | 35.83 | 25.67 | 23.98 | 23.67 |
| 696 | 88.64 | 35.94 | 25.7  | 23.99 | 23.67 |
| 698 | 88.93 | 36.05 | 25.74 | 24.01 | 23.7  |
| 700 | 89.23 | 36.16 | 25.77 | 24.02 | 23.69 |
| 702 | 89.49 | 36.24 | 25.79 | 24.02 | 23.69 |
| 704 | 89.85 | 36.38 | 25.86 | 24.07 | 23.74 |
| 706 | 90.1  | 36.44 | 25.85 | 24.03 | 23.71 |
| 708 | 90.39 | 36.54 | 25.87 | 24.04 | 23.72 |
| 710 | 90.7  | 36.65 | 25.93 | 24.07 | 23.74 |
| 712 | 90.99 | 36.75 | 25.95 | 24.09 | 23.73 |
| 714 | 91.33 | 36.88 | 26    | 24.12 | 23.78 |
| 716 | 91.6  | 36.97 | 26.02 | 24.11 | 23.75 |
| 718 | 91.91 | 37.08 | 26.07 | 24.14 | 23.78 |



|     |        |       |       |       |       |
|-----|--------|-------|-------|-------|-------|
| 720 | 92.2   | 37.14 | 26.06 | 24.11 | 23.75 |
| 722 | 92.53  | 37.27 | 26.12 | 24.14 | 23.79 |
| 724 | 92.81  | 37.38 | 26.16 | 24.15 | 23.8  |
| 726 | 93.11  | 37.5  | 26.22 | 24.18 | 23.83 |
| 728 | 93.44  | 37.6  | 26.26 | 24.2  | 23.85 |
| 730 | 93.73  | 37.71 | 26.29 | 24.2  | 23.86 |
| 732 | 94     | 37.79 | 26.32 | 24.2  | 23.85 |
| 734 | 94.35  | 37.88 | 26.35 | 24.2  | 23.85 |
| 736 | 94.64  | 37.99 | 26.39 | 24.21 | 23.86 |
| 738 | 94.94  | 38.08 | 26.42 | 24.22 | 23.86 |
| 740 | 95.24  | 38.2  | 26.46 | 24.23 | 23.88 |
| 742 | 95.5   | 38.27 | 26.48 | 24.23 | 23.88 |
| 744 | 95.79  | 38.36 | 26.51 | 24.24 | 23.89 |
| 746 | 96.13  | 38.48 | 26.55 | 24.26 | 23.89 |
| 748 | 96.45  | 38.59 | 26.6  | 24.28 | 23.92 |
| 750 | 96.73  | 38.67 | 26.62 | 24.3  | 23.9  |
| 752 | 97.11  | 38.82 | 26.71 | 24.34 | 23.94 |
| 754 | 97.39  | 38.9  | 26.73 | 24.35 | 23.95 |
| 756 | 97.67  | 38.97 | 26.75 | 24.34 | 23.95 |
| 758 | 98     | 39.08 | 26.79 | 24.36 | 23.97 |
| 760 | 98.3   | 39.15 | 26.81 | 24.36 | 23.97 |
| 762 | 98.6   | 39.25 | 26.84 | 24.37 | 23.97 |
| 764 | 98.88  | 39.35 | 26.89 | 24.37 | 23.98 |
| 766 | 99.2   | 39.46 | 26.95 | 24.4  | 23.99 |
| 768 | 99.56  | 39.57 | 27    | 24.43 | 24.02 |
| 770 | 99.86  | 39.68 | 27.03 | 24.43 | 24.02 |
| 772 | 100.14 | 39.77 | 27.06 | 24.45 | 24.04 |
| 774 | 100.43 | 39.85 | 27.09 | 24.45 | 24.04 |
| 776 | 100.75 | 39.92 | 27.09 | 24.43 | 24.01 |
| 778 | 101.08 | 40.05 | 27.18 | 24.49 | 24.06 |
| 780 | 101.38 | 40.14 | 27.22 | 24.49 | 24.07 |
| 782 | 101.72 | 40.22 | 27.25 | 24.5  | 24.07 |
| 784 | 101.98 | 40.3  | 27.26 | 24.48 | 24.05 |
| 786 | 102.3  | 40.41 | 27.33 | 24.53 | 24.08 |
| 788 | 102.59 | 40.5  | 27.36 | 24.52 | 24.09 |
| 790 | 102.88 | 40.57 | 27.38 | 24.52 | 24.08 |
| 792 | 103.24 | 40.68 | 27.43 | 24.53 | 24.11 |
| 794 | 103.52 | 40.75 | 27.46 | 24.54 | 24.11 |
| 796 | 103.82 | 40.84 | 27.5  | 24.55 | 24.11 |
| 798 | 104.12 | 40.94 | 27.54 | 24.57 | 24.13 |
| 800 | 104.47 | 41.03 | 27.58 | 24.58 | 24.14 |
| 802 | 104.77 | 41.13 | 27.63 | 24.59 | 24.15 |
| 804 | 105.05 | 41.21 | 27.64 | 24.59 | 24.13 |
| 806 | 105.36 | 41.29 | 27.69 | 24.6  | 24.15 |

|     |        |       |       |       |       |
|-----|--------|-------|-------|-------|-------|
| 808 | 105.72 | 41.39 | 27.73 | 24.63 | 24.17 |
| 810 | 106.01 | 41.46 | 27.77 | 24.62 | 24.17 |
| 812 | 106.34 | 41.54 | 27.81 | 24.64 | 24.18 |
| 814 | 106.69 | 41.63 | 27.83 | 24.64 | 24.17 |
| 816 | 106.98 | 41.71 | 27.88 | 24.64 | 24.17 |
| 818 | 107.27 | 41.79 | 27.91 | 24.66 | 24.19 |
| 820 | 107.58 | 41.9  | 27.96 | 24.69 | 24.22 |
| 822 | 107.9  | 42.02 | 28.04 | 24.74 | 24.25 |
| 824 | 108.26 | 42.11 | 28.1  | 24.75 | 24.27 |
| 826 | 108.56 | 42.18 | 28.11 | 24.75 | 24.27 |
| 828 | 108.87 | 42.25 | 28.16 | 24.77 | 24.29 |
| 830 | 109.15 | 42.31 | 28.16 | 24.73 | 24.25 |
| 832 | 109.51 | 42.39 | 28.21 | 24.76 | 24.26 |
| 834 | 109.83 | 42.5  | 28.27 | 24.78 | 24.28 |
| 836 | 110.12 | 42.55 | 28.28 | 24.76 | 24.26 |
| 838 | 110.46 | 42.66 | 28.35 | 24.81 | 24.3  |
| 840 | 110.8  | 42.75 | 28.38 | 24.81 | 24.3  |
| 842 | 111.1  | 42.83 | 28.43 | 24.83 | 24.31 |
| 844 | 111.44 | 42.92 | 28.5  | 24.88 | 24.35 |
| 846 | 111.74 | 42.99 | 28.52 | 24.87 | 24.33 |
| 848 | 112.1  | 43.08 | 28.55 | 24.88 | 24.34 |
| 850 | 112.41 | 43.16 | 28.61 | 24.9  | 24.36 |
| 852 | 112.71 | 43.23 | 28.64 | 24.9  | 24.35 |
| 854 | 113.01 | 43.31 | 28.68 | 24.91 | 24.37 |
| 856 | 113.36 | 43.4  | 28.72 | 24.93 | 24.38 |
| 858 | 113.7  | 43.49 | 28.78 | 24.96 | 24.39 |
| 860 | 114.01 | 43.56 | 28.82 | 24.98 | 24.41 |
| 862 | 114.3  | 43.63 | 28.85 | 24.97 | 24.39 |
| 864 | 114.69 | 43.73 | 28.93 | 25.01 | 24.43 |
| 866 | 115    | 43.82 | 28.97 | 25.03 | 24.45 |
| 868 | 115.32 | 43.89 | 29.01 | 25.04 | 24.46 |
| 870 | 115.63 | 43.98 | 29.06 | 25.06 | 24.46 |
| 872 | 115.97 | 44.03 | 29.08 | 25.06 | 24.46 |
| 874 | 116.27 | 44.1  | 29.12 | 25.06 | 24.47 |
| 876 | 116.59 | 44.18 | 29.16 | 25.08 | 24.48 |
| 878 | 116.9  | 44.25 | 29.21 | 25.08 | 24.49 |
| 880 | 117.26 | 44.33 | 29.26 | 25.1  | 24.49 |
| 882 | 117.58 | 44.42 | 29.31 | 25.13 | 24.51 |
| 884 | 117.91 | 44.51 | 29.37 | 25.14 | 24.54 |
| 886 | 118.2  | 44.58 | 29.41 | 25.17 | 24.56 |
| 888 | 118.58 | 44.65 | 29.46 | 25.18 | 24.56 |
| 890 | 118.91 | 44.75 | 29.52 | 25.21 | 24.58 |
| 892 | 119.2  | 44.78 | 29.53 | 25.19 | 24.55 |
| 894 | 119.54 | 44.89 | 29.61 | 25.24 | 24.6  |

|     |        |       |       |       |       |
|-----|--------|-------|-------|-------|-------|
| 896 | 119.9  | 44.97 | 29.66 | 25.25 | 24.61 |
| 898 | 120.2  | 45.04 | 29.69 | 25.25 | 24.6  |
| 900 | 120.52 | 45.12 | 29.75 | 25.28 | 24.63 |
| 902 | 120.82 | 45.17 | 29.78 | 25.28 | 24.62 |
| 904 | 121.23 | 45.28 | 29.87 | 25.33 | 24.67 |
| 906 | 121.55 | 45.36 | 29.92 | 25.36 | 24.69 |
| 908 | 121.85 | 45.41 | 29.95 | 25.35 | 24.67 |
| 910 | 122.22 | 45.48 | 29.99 | 25.37 | 24.68 |
| 912 | 122.56 | 45.56 | 30.06 | 25.38 | 24.68 |
| 914 | 122.89 | 45.65 | 30.12 | 25.43 | 24.73 |
| 916 | 123.17 | 45.68 | 30.13 | 25.42 | 24.71 |
| 918 | 123.51 | 45.79 | 30.2  | 25.46 | 24.75 |
| 920 | 123.86 | 45.84 | 30.23 | 25.46 | 24.73 |
| 922 | 124.17 | 45.91 | 30.26 | 25.46 | 24.73 |
| 924 | 124.51 | 45.98 | 30.32 | 25.5  | 24.76 |
| 926 | 124.86 | 46.06 | 30.38 | 25.52 | 24.78 |
| 928 | 125.24 | 46.13 | 30.43 | 25.53 | 24.78 |
| 930 | 125.57 | 46.21 | 30.46 | 25.54 | 24.8  |
| 932 | 125.89 | 46.28 | 30.53 | 25.59 | 24.83 |
| 934 | 126.2  | 46.33 | 30.57 | 25.58 | 24.82 |
| 936 | 126.56 | 46.42 | 30.62 | 25.61 | 24.84 |
| 938 | 126.88 | 46.48 | 30.67 | 25.63 | 24.85 |
| 940 | 127.2  | 46.56 | 30.72 | 25.65 | 24.86 |
| 942 | 127.49 | 46.57 | 30.72 | 25.62 | 24.83 |
| 944 | 127.9  | 46.67 | 30.81 | 25.66 | 24.87 |
| 946 | 128.21 | 46.74 | 30.85 | 25.68 | 24.9  |
| 948 | 128.51 | 46.8  | 30.89 | 25.69 | 24.89 |
| 950 | 128.85 | 46.87 | 30.95 | 25.71 | 24.93 |
| 952 | 129.23 | 46.94 | 31    | 25.74 | 24.94 |
| 954 | 129.53 | 46.99 | 31.03 | 25.73 | 24.93 |
| 956 | 129.84 | 47.02 | 31.05 | 25.74 | 24.92 |
| 958 | 130.2  | 47.12 | 31.13 | 25.78 | 24.96 |
| 960 | 130.59 | 47.19 | 31.18 | 25.8  | 24.97 |
| 962 | 130.91 | 47.24 | 31.23 | 25.82 | 24.98 |
| 964 | 131.24 | 47.31 | 31.28 | 25.83 | 24.99 |
| 966 | 131.62 | 47.37 | 31.33 | 25.86 | 25    |
| 968 | 131.98 | 47.47 | 31.41 | 25.9  | 25.04 |
| 970 | 132.29 | 47.51 | 31.44 | 25.91 | 25.04 |
| 972 | 132.61 | 47.55 | 31.47 | 25.91 | 25.03 |
| 974 | 132.99 | 47.61 | 31.51 | 25.93 | 25.04 |
| 976 | 133.34 | 47.7  | 31.6  | 25.96 | 25.07 |
| 978 | 133.65 | 47.74 | 31.62 | 25.98 | 25.06 |
| 980 | 134.02 | 47.83 | 31.69 | 26.01 | 25.11 |
| 982 | 134.3  | 47.85 | 31.7  | 25.99 | 25.09 |

|      |        |       |       |       |       |
|------|--------|-------|-------|-------|-------|
| 984  | 134.7  | 47.91 | 31.76 | 26.02 | 25.12 |
| 986  | 135    | 47.96 | 31.79 | 26.02 | 25.11 |
| 988  | 135.32 | 48.01 | 31.82 | 26.03 | 25.11 |
| 990  | 135.67 | 48.1  | 31.9  | 26.07 | 25.15 |
| 992  | 136.03 | 48.13 | 31.92 | 26.07 | 25.12 |
| 994  | 136.36 | 48.18 | 31.97 | 26.08 | 25.14 |
| 996  | 136.7  | 48.25 | 32.03 | 26.11 | 25.16 |
| 998  | 137.14 | 48.35 | 32.12 | 26.17 | 25.21 |
| 1000 | 137.48 | 48.41 | 32.16 | 26.2  | 25.21 |
| 1002 | 137.81 | 48.46 | 32.2  | 26.2  | 25.2  |
| 1004 | 138.12 | 48.49 | 32.22 | 26.19 | 25.19 |
| 1006 | 138.46 | 48.57 | 32.28 | 26.24 | 25.23 |
| 1008 | 138.85 | 48.61 | 32.34 | 26.25 | 25.23 |
| 1010 | 139.2  | 48.68 | 32.39 | 26.28 | 25.27 |
| 1012 | 139.48 | 48.71 | 32.4  | 26.27 | 25.25 |
| 1014 | 139.79 | 48.75 | 32.44 | 26.27 | 25.24 |
| 1016 | 140.22 | 48.85 | 32.52 | 26.33 | 25.28 |
| 1018 | 140.57 | 48.91 | 32.56 | 26.33 | 25.28 |
| 1020 | 140.93 | 48.98 | 32.64 | 26.39 | 25.33 |
| 1022 | 141.26 | 49.02 | 32.67 | 26.4  | 25.32 |
| 1024 | 141.65 | 49.06 | 32.71 | 26.41 | 25.33 |
| 1026 | 142.01 | 49.14 | 32.77 | 26.44 | 25.36 |
| 1028 | 142.33 | 49.19 | 32.82 | 26.45 | 25.37 |
| 1030 | 142.69 | 49.22 | 32.84 | 26.46 | 25.38 |
| 1032 | 143.01 | 49.27 | 32.88 | 26.45 | 25.39 |
| 1034 | 143.35 | 49.32 | 32.93 | 26.48 | 25.39 |
| 1036 | 143.71 | 49.39 | 32.99 | 26.51 | 25.42 |
| 1038 | 144.06 | 49.45 | 33.04 | 26.53 | 25.42 |
| 1040 | 144.45 | 49.49 | 33.08 | 26.54 | 25.43 |
| 1042 | 144.78 | 49.55 | 33.14 | 26.56 | 25.45 |
| 1044 | 145.11 | 49.6  | 33.19 | 26.58 | 25.45 |
| 1046 | 145.45 | 49.66 | 33.23 | 26.61 | 25.47 |
| 1048 | 145.83 | 49.7  | 33.24 | 26.59 | 25.45 |
| 1050 | 146.2  | 49.77 | 33.32 | 26.65 | 25.48 |
| 1052 | 146.55 | 49.82 | 33.37 | 26.68 | 25.49 |
| 1054 | 146.89 | 49.87 | 33.42 | 26.7  | 25.51 |
| 1056 | 147.3  | 49.94 | 33.49 | 26.74 | 25.54 |
| 1058 | 147.63 | 49.98 | 33.53 | 26.74 | 25.53 |
| 1060 | 147.96 | 50.03 | 33.56 | 26.75 | 25.54 |
| 1062 | 148.29 | 50.06 | 33.6  | 26.75 | 25.55 |
| 1064 | 148.68 | 50.11 | 33.64 | 26.77 | 25.56 |
| 1066 | 148.99 | 50.16 | 33.68 | 26.79 | 25.56 |
| 1068 | 149.36 | 50.22 | 33.74 | 26.81 | 25.58 |
| 1070 | 149.71 | 50.27 | 33.79 | 26.83 | 25.59 |

|      |        |       |       |       |       |
|------|--------|-------|-------|-------|-------|
| 1072 | 150.11 | 50.31 | 33.83 | 26.83 | 25.6  |
| 1074 | 150.45 | 50.36 | 33.88 | 26.86 | 25.61 |
| 1076 | 150.79 | 50.41 | 33.93 | 26.87 | 25.62 |
| 1078 | 151.11 | 50.46 | 33.97 | 26.89 | 25.62 |
| 1080 | 151.54 | 50.52 | 34.01 | 26.91 | 25.63 |
| 1082 | 151.89 | 50.58 | 34.07 | 26.95 | 25.66 |
| 1084 | 152.23 | 50.62 | 34.11 | 26.96 | 25.65 |
| 1086 | 152.57 | 50.67 | 34.16 | 26.99 | 25.67 |
| 1088 | 152.98 | 50.73 | 34.21 | 27.01 | 25.68 |
| 1090 | 153.33 | 50.78 | 34.26 | 27.04 | 25.69 |
| 1092 | 153.7  | 50.84 | 34.31 | 27.06 | 25.71 |
| 1094 | 154.03 | 50.87 | 34.34 | 27.07 | 25.71 |
| 1096 | 154.44 | 50.92 | 34.39 | 27.08 | 25.73 |
| 1098 | 154.77 | 50.97 | 34.42 | 27.11 | 25.75 |
| 1100 | 155.13 | 51.01 | 34.48 | 27.13 | 25.77 |
| 1102 | 155.44 | 51.05 | 34.51 | 27.12 | 25.76 |
| 1104 | 155.85 | 51.11 | 34.56 | 27.15 | 25.79 |
| 1106 | 156.18 | 51.15 | 34.6  | 27.16 | 25.78 |
| 1108 | 156.53 | 51.2  | 34.65 | 27.18 | 25.79 |
| 1110 | 156.95 | 51.24 | 34.69 | 27.2  | 25.8  |
| 1112 | 157.3  | 51.29 | 34.73 | 27.22 | 25.81 |
| 1114 | 157.65 | 51.33 | 34.79 | 27.24 | 25.82 |
| 1116 | 158    | 51.38 | 34.83 | 27.26 | 25.83 |
| 1118 | 158.42 | 51.43 | 34.87 | 27.28 | 25.85 |
| 1120 | 158.75 | 51.5  | 34.94 | 27.32 | 25.87 |
| 1122 | 159.11 | 51.55 | 34.99 | 27.35 | 25.89 |
| 1124 | 159.48 | 51.6  | 35.05 | 27.37 | 25.91 |
| 1126 | 159.83 | 51.65 | 35.09 | 27.38 | 25.92 |
| 1128 | 160.26 | 51.7  | 35.15 | 27.42 | 25.96 |
| 1130 | 160.62 | 51.77 | 35.2  | 27.44 | 25.97 |
| 1132 | 160.96 | 51.8  | 35.23 | 27.45 | 25.96 |
| 1134 | 161.31 | 51.84 | 35.27 | 27.47 | 25.98 |
| 1136 | 161.73 | 51.91 | 35.33 | 27.51 | 26    |
| 1138 | 162.06 | 51.93 | 35.36 | 27.51 | 25.99 |
| 1140 | 162.43 | 52    | 35.43 | 27.55 | 26.03 |
| 1142 | 162.85 | 52.05 | 35.47 | 27.57 | 26.04 |
| 1144 | 163.19 | 52.08 | 35.51 | 27.58 | 26.04 |
| 1146 | 163.5  | 52.1  | 35.52 | 27.57 | 26.03 |
| 1148 | 163.89 | 52.17 | 35.6  | 27.63 | 26.07 |
| 1150 | 164.24 | 52.21 | 35.63 | 27.62 | 26.07 |
| 1152 | 164.67 | 52.28 | 35.69 | 27.66 | 26.09 |
| 1154 | 165.02 | 52.34 | 35.75 | 27.69 | 26.12 |
| 1156 | 165.35 | 52.37 | 35.77 | 27.7  | 26.12 |
| 1158 | 165.69 | 52.41 | 35.82 | 27.72 | 26.13 |

|      |        |       |       |       |       |
|------|--------|-------|-------|-------|-------|
| 1160 | 166.14 | 52.47 | 35.87 | 27.74 | 26.15 |
| 1162 | 166.5  | 52.53 | 35.93 | 27.78 | 26.18 |
| 1164 | 166.86 | 52.57 | 35.98 | 27.79 | 26.18 |
| 1166 | 167.19 | 52.59 | 36    | 27.8  | 26.18 |
| 1168 | 167.61 | 52.64 | 36.04 | 27.81 | 26.19 |
| 1170 | 168.02 | 52.73 | 36.14 | 27.87 | 26.24 |
| 1172 | 168.35 | 52.75 | 36.15 | 27.87 | 26.24 |
| 1174 | 168.73 | 52.77 | 36.17 | 27.87 | 26.22 |
| 1176 | 169.08 | 52.84 | 36.23 | 27.9  | 26.24 |
| 1178 | 169.44 | 52.89 | 36.28 | 27.94 | 26.26 |
| 1180 | 169.8  | 52.92 | 36.32 | 27.97 | 26.29 |
| 1182 | 170.18 | 52.97 | 36.37 | 27.98 | 26.3  |
| 1184 | 170.58 | 53.02 | 36.4  | 27.98 | 26.3  |
| 1186 | 170.96 | 53.08 | 36.47 | 28.02 | 26.32 |
| 1188 | 171.33 | 53.13 | 36.53 | 28.06 | 26.36 |
| 1190 | 171.64 | 53.14 | 36.52 | 28.03 | 26.33 |
| 1192 | 172.05 | 53.18 | 36.57 | 28.04 | 26.33 |
| 1194 | 172.41 | 53.23 | 36.61 | 28.06 | 26.34 |
| 1196 | 172.79 | 53.29 | 36.67 | 28.12 | 26.38 |
| 1198 | 173.16 | 53.35 | 36.73 | 28.14 | 26.41 |
| 1200 | 173.57 | 53.38 | 36.76 | 28.15 | 26.39 |
| 1202 | 173.95 | 53.44 | 36.82 | 28.18 | 26.41 |
| 1204 | 174.31 | 53.47 | 36.85 | 28.2  | 26.41 |
| 1206 | 174.73 | 53.51 | 36.89 | 28.21 | 26.42 |
| 1208 | 175.11 | 53.59 | 36.96 | 28.27 | 26.48 |
| 1210 | 175.46 | 53.62 | 37    | 28.27 | 26.46 |
| 1212 | 175.81 | 53.66 | 37.04 | 28.29 | 26.48 |
| 1214 | 176.18 | 53.71 | 37.09 | 28.32 | 26.5  |
| 1216 | 176.53 | 53.77 | 37.14 | 28.35 | 26.54 |
| 1218 | 176.93 | 53.81 | 37.17 | 28.34 | 26.53 |
| 1220 | 177.31 | 53.85 | 37.23 | 28.38 | 26.55 |
| 1222 | 177.68 | 53.9  | 37.27 | 28.4  | 26.57 |
| 1224 | 178.1  | 53.94 | 37.31 | 28.41 | 26.58 |
| 1226 | 178.48 | 54    | 37.38 | 28.46 | 26.6  |
| 1228 | 178.84 | 54.04 | 37.42 | 28.49 | 26.63 |
| 1230 | 179.21 | 54.11 | 37.48 | 28.52 | 26.65 |
| 1232 | 179.61 | 54.12 | 37.49 | 28.5  | 26.62 |
| 1234 | 179.97 | 54.16 | 37.55 | 28.54 | 26.64 |
| 1236 | 180.33 | 54.21 | 37.58 | 28.56 | 26.66 |
| 1238 | 180.69 | 54.26 | 37.63 | 28.58 | 26.68 |
| 1240 | 181.11 | 54.3  | 37.67 | 28.6  | 26.69 |
| 1242 | 181.48 | 54.35 | 37.72 | 28.63 | 26.72 |
| 1244 | 181.83 | 54.38 | 37.75 | 28.63 | 26.73 |
| 1246 | 182.17 | 54.41 | 37.78 | 28.64 | 26.72 |

|      |        |       |       |       |       |
|------|--------|-------|-------|-------|-------|
| 1248 | 182.59 | 54.46 | 37.84 | 28.68 | 26.76 |
| 1250 | 182.94 | 54.5  | 37.87 | 28.68 | 26.75 |
| 1252 | 183.3  | 54.54 | 37.92 | 28.7  | 26.76 |
| 1254 | 183.66 | 54.57 | 37.96 | 28.71 | 26.78 |
| 1256 | 184.13 | 54.65 | 38.04 | 28.76 | 26.82 |
| 1258 | 184.5  | 54.71 | 38.09 | 28.81 | 26.84 |
| 1260 | 184.83 | 54.73 | 38.1  | 28.79 | 26.82 |
| 1262 | 185.22 | 54.77 | 38.15 | 28.83 | 26.84 |
| 1264 | 185.64 | 54.81 | 38.18 | 28.83 | 26.84 |
| 1266 | 186.05 | 54.9  | 38.28 | 28.9  | 26.91 |
| 1268 | 186.35 | 54.9  | 38.27 | 28.89 | 26.87 |
| 1270 | 186.76 | 54.93 | 38.31 | 28.9  | 26.88 |
| 1272 | 187.15 | 54.99 | 38.37 | 28.94 | 26.93 |
| 1274 | 187.51 | 55.03 | 38.42 | 28.96 | 26.95 |
| 1276 | 187.85 | 55.04 | 38.43 | 28.94 | 26.91 |
| 1278 | 188.21 | 55.08 | 38.47 | 28.96 | 26.93 |
| 1280 | 188.65 | 55.14 | 38.52 | 29    | 26.95 |
| 1282 | 188.98 | 55.18 | 38.56 | 29.01 | 26.95 |
| 1284 | 189.33 | 55.21 | 38.6  | 29.02 | 26.96 |
| 1286 | 189.7  | 55.26 | 38.64 | 29.05 | 26.97 |
| 1288 | 190.14 | 55.3  | 38.69 | 29.08 | 26.99 |
| 1290 | 190.56 | 55.39 | 38.78 | 29.13 | 27.03 |
| 1292 | 190.94 | 55.44 | 38.82 | 29.17 | 27.05 |
| 1294 | 191.31 | 55.43 | 38.82 | 29.14 | 27.03 |
| 1296 | 191.73 | 55.51 | 38.9  | 29.21 | 27.07 |
| 1298 | 192.11 | 55.56 | 38.97 | 29.25 | 27.11 |
| 1300 | 192.41 | 55.55 | 38.95 | 29.21 | 27.07 |
| 1302 | 192.81 | 55.58 | 38.98 | 29.21 | 27.07 |
| 1304 | 193.18 | 55.64 | 39.03 | 29.23 | 27.08 |
| 1306 | 193.58 | 55.7  | 39.1  | 29.3  | 27.13 |
| 1308 | 193.97 | 55.76 | 39.16 | 29.35 | 27.16 |
| 1310 | 194.32 | 55.78 | 39.19 | 29.35 | 27.17 |
| 1312 | 194.72 | 55.82 | 39.22 | 29.37 | 27.18 |
| 1314 | 195.07 | 55.85 | 39.24 | 29.35 | 27.16 |
| 1316 | 195.47 | 55.93 | 39.32 | 29.42 | 27.2  |
| 1318 | 195.85 | 55.96 | 39.36 | 29.44 | 27.2  |
| 1320 | 196.31 | 56.03 | 39.43 | 29.49 | 27.25 |
| 1322 | 196.66 | 56.05 | 39.46 | 29.51 | 27.25 |
| 1324 | 197.02 | 56.07 | 39.49 | 29.51 | 27.25 |
| 1326 | 197.43 | 56.15 | 39.57 | 29.57 | 27.28 |
| 1328 | 197.84 | 56.17 | 39.58 | 29.58 | 27.29 |
| 1330 | 198.21 | 56.21 | 39.63 | 29.58 | 27.3  |
| 1332 | 198.57 | 56.24 | 39.67 | 29.59 | 27.32 |
| 1334 | 198.92 | 56.28 | 39.7  | 29.61 | 27.33 |

|      |        |       |       |       |       |
|------|--------|-------|-------|-------|-------|
| 1336 | 199.35 | 56.32 | 39.74 | 29.63 | 27.34 |
| 1338 | 199.73 | 56.36 | 39.79 | 29.65 | 27.35 |
| 1340 | 200.09 | 56.37 | 39.8  | 29.65 | 27.35 |
| 1342 | 200.48 | 56.42 | 39.86 | 29.69 | 27.37 |
| 1344 | 200.94 | 56.47 | 39.9  | 29.71 | 27.39 |
| 1346 | 201.3  | 56.51 | 39.95 | 29.73 | 27.4  |
| 1348 | 201.68 | 56.55 | 40    | 29.76 | 27.42 |
| 1350 | 202.06 | 56.6  | 40.04 | 29.79 | 27.43 |
| 1352 | 202.5  | 56.64 | 40.08 | 29.82 | 27.45 |
| 1354 | 202.89 | 56.71 | 40.15 | 29.86 | 27.48 |
| 1356 | 203.24 | 56.71 | 40.16 | 29.86 | 27.48 |
| 1358 | 203.6  | 56.73 | 40.18 | 29.87 | 27.48 |
| 1360 | 204.06 | 56.79 | 40.25 | 29.9  | 27.5  |
| 1362 | 204.48 | 56.86 | 40.3  | 29.96 | 27.54 |
| 1364 | 204.83 | 56.88 | 40.33 | 29.95 | 27.54 |
| 1366 | 205.2  | 56.92 | 40.38 | 29.98 | 27.58 |
| 1368 | 205.65 | 56.98 | 40.45 | 30.01 | 27.6  |
| 1370 | 206.03 | 57.02 | 40.49 | 30.05 | 27.63 |
| 1372 | 206.36 | 57.03 | 40.51 | 30.05 | 27.61 |
| 1374 | 206.77 | 57.1  | 40.57 | 30.09 | 27.65 |
| 1376 | 207.19 | 57.1  | 40.58 | 30.09 | 27.63 |
| 1378 | 207.55 | 57.12 | 40.6  | 30.07 | 27.62 |
| 1380 | 207.96 | 57.19 | 40.67 | 30.13 | 27.66 |
| 1382 | 208.32 | 57.23 | 40.71 | 30.16 | 27.68 |
| 1384 | 208.79 | 57.29 | 40.78 | 30.21 | 27.72 |
| 1386 | 209.16 | 57.32 | 40.83 | 30.23 | 27.73 |
| 1388 | 209.53 | 57.36 | 40.86 | 30.25 | 27.74 |
| 1390 | 209.94 | 57.38 | 40.87 | 30.25 | 27.74 |
| 1392 | 210.33 | 57.43 | 40.93 | 30.28 | 27.76 |
| 1394 | 210.69 | 57.43 | 40.94 | 30.28 | 27.74 |
| 1396 | 211.11 | 57.5  | 41    | 30.32 | 27.78 |
| 1398 | 211.48 | 57.52 | 41.04 | 30.33 | 27.79 |
| 1400 | 211.87 | 57.51 | 41.05 | 30.31 | 27.76 |
| 1402 | 212.27 | 57.58 | 41.1  | 30.35 | 27.8  |
| 1404 | 212.61 | 57.58 | 41.11 | 30.34 | 27.77 |
| 1406 | 213.01 | 57.64 | 41.17 | 30.4  | 27.84 |
| 1408 | 213.44 | 57.66 | 41.19 | 30.39 | 27.82 |
| 1410 | 213.82 | 57.69 | 41.23 | 30.4  | 27.82 |
| 1412 | 214.2  | 57.72 | 41.26 | 30.43 | 27.84 |
| 1414 | 214.61 | 57.8  | 41.35 | 30.49 | 27.89 |
| 1416 | 215.01 | 57.79 | 41.34 | 30.45 | 27.84 |
| 1418 | 215.42 | 57.85 | 41.39 | 30.49 | 27.88 |
| 1420 | 215.79 | 57.88 | 41.43 | 30.51 | 27.89 |
| 1422 | 216.24 | 57.9  | 41.46 | 30.53 | 27.9  |



|      |        |       |       |       |       |
|------|--------|-------|-------|-------|-------|
| 1424 | 216.63 | 57.94 | 41.52 | 30.55 | 27.91 |
| 1426 | 217.06 | 58.03 | 41.6  | 30.62 | 27.95 |
| 1428 | 217.41 | 58.02 | 41.59 | 30.61 | 27.92 |
| 1430 | 217.77 | 58.05 | 41.62 | 30.62 | 27.94 |
| 1432 | 218.15 | 58.1  | 41.67 | 30.65 | 27.96 |
| 1434 | 218.6  | 58.14 | 41.72 | 30.67 | 27.98 |
| 1436 | 218.96 | 58.16 | 41.74 | 30.69 | 27.99 |
| 1438 | 219.37 | 58.22 | 41.79 | 30.7  | 28.01 |
| 1440 | 219.82 | 58.24 | 41.83 | 30.72 | 28.01 |
| 1442 | 220.22 | 58.29 | 41.88 | 30.74 | 28.04 |
| 1444 | 220.6  | 58.32 | 41.92 | 30.78 | 28.06 |
| 1446 | 221.02 | 58.38 | 41.97 | 30.81 | 28.08 |
| 1448 | 221.44 | 58.39 | 41.98 | 30.8  | 28.06 |
| 1450 | 221.8  | 58.4  | 42.01 | 30.8  | 28.07 |
| 1452 | 222.17 | 58.43 | 42.04 | 30.82 | 28.08 |
| 1454 | 222.63 | 58.47 | 42.07 | 30.85 | 28.09 |
| 1456 | 223.03 | 58.53 | 42.13 | 30.89 | 28.12 |
| 1458 | 223.43 | 58.55 | 42.18 | 30.91 | 28.13 |
| 1460 | 223.81 | 58.58 | 42.21 | 30.92 | 28.14 |
| 1462 | 224.2  | 58.62 | 42.24 | 30.94 | 28.15 |
| 1464 | 224.66 | 58.65 | 42.28 | 30.97 | 28.17 |
| 1466 | 225.03 | 58.69 | 42.33 | 30.99 | 28.18 |
| 1468 | 225.44 | 58.73 | 42.37 | 31.01 | 28.21 |
| 1470 | 225.88 | 58.8  | 42.44 | 31.07 | 28.24 |
| 1472 | 226.34 | 58.84 | 42.48 | 31.09 | 28.26 |
| 1474 | 226.72 | 58.89 | 42.52 | 31.11 | 28.27 |
| 1476 | 227.1  | 58.9  | 42.54 | 31.11 | 28.26 |
| 1478 | 227.5  | 58.95 | 42.59 | 31.14 | 28.29 |
| 1480 | 227.95 | 58.99 | 42.63 | 31.17 | 28.3  |
| 1482 | 228.34 | 59.02 | 42.68 | 31.2  | 28.31 |
| 1484 | 228.75 | 59.05 | 42.71 | 31.22 | 28.33 |
| 1486 | 229.21 | 59.09 | 42.76 | 31.24 | 28.34 |
| 1488 | 229.61 | 59.13 | 42.79 | 31.26 | 28.35 |
| 1490 | 230    | 59.16 | 42.83 | 31.29 | 28.36 |
| 1492 | 230.38 | 59.19 | 42.86 | 31.3  | 28.37 |
| 1494 | 230.78 | 59.22 | 42.9  | 31.33 | 28.39 |
| 1496 | 231.26 | 59.27 | 42.94 | 31.35 | 28.4  |
| 1498 | 231.67 | 59.31 | 42.99 | 31.39 | 28.43 |
| 1500 | 232.06 | 59.33 | 43.02 | 31.39 | 28.42 |
| 1502 | 232.45 | 59.36 | 43.06 | 31.42 | 28.43 |
| 1504 | 232.91 | 59.39 | 43.1  | 31.43 | 28.45 |
| 1506 | 233.31 | 59.43 | 43.13 | 31.46 | 28.46 |
| 1508 | 233.7  | 59.47 | 43.17 | 31.48 | 28.47 |
| 1510 | 234.16 | 59.49 | 43.2  | 31.5  | 28.49 |

|      |        |       |       |       |       |
|------|--------|-------|-------|-------|-------|
| 1512 | 234.55 | 59.53 | 43.22 | 31.51 | 28.48 |
| 1514 | 234.95 | 59.57 | 43.29 | 31.54 | 28.5  |
| 1516 | 235.35 | 59.6  | 43.32 | 31.56 | 28.54 |
| 1518 | 235.88 | 59.67 | 43.38 | 31.61 | 28.57 |
| 1520 | 236.25 | 59.68 | 43.4  | 31.6  | 28.55 |
| 1522 | 236.64 | 59.7  | 43.43 | 31.62 | 28.56 |
| 1524 | 237.03 | 59.73 | 43.46 | 31.64 | 28.58 |
| 1526 | 237.46 | 59.78 | 43.53 | 31.68 | 28.62 |
| 1528 | 237.9  | 59.79 | 43.54 | 31.67 | 28.6  |
| 1530 | 238.3  | 59.84 | 43.59 | 31.71 | 28.61 |
| 1532 | 238.69 | 59.85 | 43.61 | 31.71 | 28.62 |
| 1534 | 239.08 | 59.88 | 43.64 | 31.72 | 28.62 |
| 1536 | 239.6  | 59.94 | 43.71 | 31.77 | 28.66 |
| 1538 | 240.05 | 60.01 | 43.77 | 31.82 | 28.7  |
| 1540 | 240.46 | 60.05 | 43.82 | 31.86 | 28.72 |
| 1542 | 240.86 | 60.06 | 43.85 | 31.86 | 28.72 |
| 1544 | 241.33 | 60.08 | 43.86 | 31.86 | 28.73 |
| 1546 | 241.7  | 60.11 | 43.9  | 31.88 | 28.74 |
| 1548 | 242.1  | 60.14 | 43.92 | 31.9  | 28.73 |
| 1550 | 242.51 | 60.18 | 43.98 | 31.94 | 28.76 |
| 1552 | 243.01 | 60.21 | 44.02 | 31.97 | 28.78 |
| 1554 | 243.46 | 60.28 | 44.08 | 32.02 | 28.82 |
| 1556 | 243.88 | 60.31 | 44.12 | 32.02 | 28.82 |
| 1558 | 244.28 | 60.33 | 44.15 | 32.04 | 28.82 |
| 1560 | 244.75 | 60.36 | 44.18 | 32.06 | 28.84 |
| 1562 | 245.18 | 60.42 | 44.24 | 32.11 | 28.87 |
| 1564 | 245.57 | 60.43 | 44.27 | 32.11 | 28.86 |
| 1566 | 245.94 | 60.46 | 44.29 | 32.12 | 28.86 |
| 1568 | 246.43 | 60.49 | 44.32 | 32.15 | 28.88 |
| 1570 | 246.86 | 60.52 | 44.36 | 32.17 | 28.89 |
| 1572 | 247.28 | 60.55 | 44.4  | 32.18 | 28.9  |
| 1574 | 247.7  | 60.59 | 44.43 | 32.21 | 28.91 |
| 1576 | 248.18 | 60.62 | 44.48 | 32.23 | 28.92 |
| 1578 | 248.58 | 60.65 | 44.51 | 32.26 | 28.94 |
| 1580 | 248.98 | 60.69 | 44.55 | 32.29 | 28.95 |
| 1582 | 249.39 | 60.72 | 44.58 | 32.32 | 28.96 |
| 1584 | 249.89 | 60.74 | 44.61 | 32.33 | 28.97 |
| 1586 | 250.31 | 60.76 | 44.63 | 32.33 | 28.97 |
| 1588 | 250.75 | 60.81 | 44.69 | 32.36 | 28.99 |
| 1590 | 251.18 | 60.85 | 44.73 | 32.4  | 29.02 |
| 1592 | 251.68 | 60.89 | 44.78 | 32.44 | 29.05 |
| 1594 | 252.11 | 60.92 | 44.83 | 32.45 | 29.05 |
| 1596 | 252.48 | 60.92 | 44.83 | 32.44 | 29.04 |
| 1598 | 252.88 | 60.95 | 44.86 | 32.46 | 29.05 |

|      |        |       |       |       |       |
|------|--------|-------|-------|-------|-------|
| 1600 | 253.37 | 60.99 | 44.89 | 32.47 | 29.07 |
| 1602 | 253.79 | 61.02 | 44.93 | 32.5  | 29.08 |
| 1604 | 254.21 | 61.02 | 44.95 | 32.5  | 29.07 |
| 1606 | 254.71 | 61.05 | 44.97 | 32.51 | 29.08 |
| 1608 | 255.14 | 61.1  | 45.03 | 32.55 | 29.1  |
| 1610 | 255.59 | 61.16 | 45.09 | 32.61 | 29.14 |
| 1612 | 256.05 | 61.21 | 45.14 | 32.64 | 29.18 |
| 1614 | 256.44 | 61.23 | 45.17 | 32.66 | 29.19 |
| 1616 | 256.9  | 61.25 | 45.19 | 32.66 | 29.18 |
| 1618 | 257.32 | 61.3  | 45.24 | 32.7  | 29.21 |
| 1620 | 257.73 | 61.31 | 45.25 | 32.69 | 29.2  |
| 1622 | 258.17 | 61.35 | 45.29 | 32.73 | 29.22 |
| 1624 | 258.68 | 61.36 | 45.31 | 32.73 | 29.22 |
| 1626 | 259.11 | 61.39 | 45.34 | 32.73 | 29.22 |
| 1628 | 259.54 | 61.43 | 45.38 | 32.77 | 29.24 |
| 1630 | 259.96 | 61.45 | 45.42 | 32.79 | 29.25 |
| 1632 | 260.47 | 61.5  | 45.45 | 32.81 | 29.27 |
| 1634 | 260.88 | 61.55 | 45.5  | 32.86 | 29.3  |
| 1636 | 261.29 | 61.55 | 45.51 | 32.86 | 29.3  |
| 1638 | 261.8  | 61.59 | 45.56 | 32.89 | 29.31 |
| 1640 | 262.24 | 61.62 | 45.59 | 32.91 | 29.32 |
| 1642 | 262.69 | 61.68 | 45.65 | 32.95 | 29.36 |
| 1644 | 263.1  | 61.69 | 45.66 | 32.95 | 29.35 |
| 1646 | 263.51 | 61.73 | 45.69 | 32.98 | 29.36 |
| 1648 | 264.01 | 61.79 | 45.75 | 33.01 | 29.38 |
| 1650 | 264.42 | 61.81 | 45.77 | 33.01 | 29.39 |
| 1652 | 264.86 | 61.85 | 45.83 | 33.06 | 29.43 |
| 1654 | 265.31 | 61.89 | 45.86 | 33.08 | 29.46 |
| 1656 | 265.83 | 61.94 | 45.91 | 33.12 | 29.48 |
| 1658 | 266.28 | 61.98 | 45.96 | 33.15 | 29.5  |
| 1660 | 266.72 | 62    | 45.99 | 33.18 | 29.51 |
| 1662 | 267.14 | 62.02 | 46.02 | 33.18 | 29.51 |
| 1664 | 267.65 | 62.07 | 46.06 | 33.22 | 29.54 |
| 1666 | 268.08 | 62.09 | 46.1  | 33.25 | 29.54 |
| 1668 | 268.48 | 62.12 | 46.12 | 33.27 | 29.56 |
| 1670 | 268.92 | 62.16 | 46.17 | 33.3  | 29.58 |
| 1672 | 269.48 | 62.25 | 46.26 | 33.36 | 29.64 |
| 1674 | 269.89 | 62.23 | 46.25 | 33.36 | 29.63 |
| 1676 | 270.34 | 62.29 | 46.3  | 33.4  | 29.66 |
| 1678 | 270.78 | 62.31 | 46.31 | 33.4  | 29.65 |
| 1680 | 271.26 | 62.33 | 46.33 | 33.41 | 29.64 |
| 1682 | 271.68 | 62.36 | 46.37 | 33.44 | 29.66 |
| 1684 | 272.08 | 62.38 | 46.38 | 33.44 | 29.66 |
| 1686 | 272.6  | 62.4  | 46.43 | 33.47 | 29.68 |

|      |        |       |       |       |       |
|------|--------|-------|-------|-------|-------|
| 1688 | 273.05 | 62.45 | 46.47 | 33.5  | 29.7  |
| 1690 | 273.51 | 62.49 | 46.52 | 33.54 | 29.73 |
| 1692 | 273.97 | 62.52 | 46.56 | 33.57 | 29.75 |
| 1694 | 274.4  | 62.53 | 46.58 | 33.57 | 29.74 |
| 1696 | 274.91 | 62.58 | 46.64 | 33.6  | 29.76 |
| 1698 | 275.39 | 62.66 | 46.71 | 33.67 | 29.83 |
| 1700 | 275.77 | 62.65 | 46.69 | 33.64 | 29.79 |
| 1702 | 276.18 | 62.66 | 46.71 | 33.65 | 29.79 |
| 1704 | 276.67 | 62.69 | 46.75 | 33.68 | 29.81 |
| 1706 | 277.11 | 62.73 | 46.78 | 33.7  | 29.82 |
| 1708 | 277.58 | 62.77 | 46.82 | 33.73 | 29.84 |
| 1710 | 278.02 | 62.8  | 46.86 | 33.76 | 29.87 |
| 1712 | 278.58 | 62.87 | 46.93 | 33.81 | 29.91 |
| 1714 | 278.98 | 62.86 | 46.93 | 33.8  | 29.88 |
| 1716 | 279.41 | 62.89 | 46.95 | 33.81 | 29.9  |
| 1718 | 279.89 | 62.89 | 46.98 | 33.81 | 29.91 |
| 1720 | 280.32 | 62.94 | 47.01 | 33.84 | 29.91 |
| 1722 | 280.76 | 62.97 | 47.05 | 33.86 | 29.93 |
| 1724 | 281.2  | 63    | 47.08 | 33.88 | 29.94 |
| 1726 | 281.65 | 63.03 | 47.12 | 33.92 | 29.97 |
| 1728 | 282.17 | 63.06 | 47.14 | 33.92 | 29.97 |
| 1730 | 282.61 | 63.09 | 47.17 | 33.95 | 29.98 |
| 1732 | 283.1  | 63.18 | 47.25 | 34.02 | 30.04 |
| 1734 | 283.51 | 63.18 | 47.26 | 34.03 | 30.03 |
| 1736 | 284.02 | 63.22 | 47.29 | 34.07 | 30.06 |
| 1738 | 284.45 | 63.25 | 47.33 | 34.08 | 30.05 |
| 1740 | 284.87 | 63.26 | 47.35 | 34.07 | 30.05 |
| 1742 | 285.35 | 63.32 | 47.41 | 34.14 | 30.11 |
| 1744 | 285.86 | 63.34 | 47.44 | 34.15 | 30.1  |
| 1746 | 286.31 | 63.37 | 47.46 | 34.16 | 30.1  |
| 1748 | 286.77 | 63.42 | 47.5  | 34.2  | 30.14 |
| 1750 | 287.29 | 63.45 | 47.55 | 34.23 | 30.17 |
| 1752 | 287.71 | 63.47 | 47.58 | 34.22 | 30.18 |
| 1754 | 288.15 | 63.52 | 47.62 | 34.26 | 30.2  |
| 1756 | 288.59 | 63.55 | 47.66 | 34.29 | 30.21 |
| 1758 | 289.04 | 63.58 | 47.68 | 34.32 | 30.23 |
| 1760 | 289.56 | 63.62 | 47.72 | 34.33 | 30.24 |
| 1762 | 290.02 | 63.66 | 47.76 | 34.37 | 30.25 |
| 1764 | 290.47 | 63.69 | 47.79 | 34.41 | 30.29 |
| 1766 | 290.91 | 63.72 | 47.82 | 34.42 | 30.29 |
| 1768 | 291.41 | 63.75 | 47.85 | 34.43 | 30.29 |
| 1770 | 291.84 | 63.79 | 47.88 | 34.46 | 30.3  |
| 1772 | 292.27 | 63.81 | 47.91 | 34.48 | 30.32 |
| 1774 | 292.72 | 63.84 | 47.94 | 34.5  | 30.32 |

|      |        |       |       |       |       |
|------|--------|-------|-------|-------|-------|
| 1776 | 293.25 | 63.88 | 47.98 | 34.52 | 30.34 |
| 1778 | 293.71 | 63.9  | 48    | 34.54 | 30.34 |
| 1780 | 294.15 | 63.91 | 48.03 | 34.55 | 30.35 |
| 1782 | 294.69 | 63.96 | 48.07 | 34.57 | 30.37 |
| 1784 | 295.13 | 63.99 | 48.11 | 34.59 | 30.39 |
| 1786 | 295.58 | 64.03 | 48.15 | 34.63 | 30.41 |
| 1788 | 295.99 | 64.06 | 48.18 | 34.65 | 30.44 |
| 1790 | 296.43 | 64.1  | 48.21 | 34.67 | 30.45 |
| 1792 | 296.86 | 64.11 | 48.23 | 34.67 | 30.44 |
| 1794 | 297.38 | 64.14 | 48.26 | 34.69 | 30.44 |
| 1796 | 297.86 | 64.21 | 48.33 | 34.76 | 30.5  |
| 1798 | 298.33 | 64.26 | 48.37 | 34.8  | 30.53 |
| 1800 | 298.84 | 64.28 | 48.39 | 34.83 | 30.54 |
| 1802 | 299.25 | 64.31 | 48.41 | 34.84 | 30.53 |
| 1804 | 299.65 | 64.32 | 48.43 | 34.84 | 30.54 |
| 1806 | 300.13 | 64.38 | 48.5  | 34.88 | 30.57 |
| 1808 | 300.62 | 64.4  | 48.52 | 34.89 | 30.56 |
| 1810 | 301.1  | 64.44 | 48.57 | 34.91 | 30.57 |
| 1812 | 301.56 | 64.46 | 48.59 | 34.94 | 30.61 |
| 1814 | 302.02 | 64.52 | 48.64 | 34.98 | 30.64 |
| 1816 | 302.52 | 64.54 | 48.68 | 35    | 30.65 |
| 1818 | 302.94 | 64.58 | 48.72 | 35.02 | 30.65 |
| 1820 | 303.37 | 64.61 | 48.75 | 35.04 | 30.67 |
| 1822 | 303.89 | 64.64 | 48.77 | 35.07 | 30.68 |
| 1824 | 304.3  | 64.64 | 48.78 | 35.06 | 30.67 |
| 1826 | 304.77 | 64.71 | 48.84 | 35.11 | 30.7  |
| 1828 | 305.21 | 64.74 | 48.88 | 35.13 | 30.72 |
| 1830 | 305.72 | 64.78 | 48.9  | 35.16 | 30.73 |
| 1832 | 306.15 | 64.81 | 48.94 | 35.19 | 30.74 |
| 1834 | 306.55 | 64.83 | 48.95 | 35.2  | 30.73 |
| 1836 | 306.99 | 64.86 | 49    | 35.23 | 30.75 |
| 1838 | 307.44 | 64.88 | 49.02 | 35.23 | 30.75 |
| 1840 | 307.97 | 64.93 | 49.07 | 35.27 | 30.78 |
| 1842 | 308.41 | 64.95 | 49.1  | 35.27 | 30.78 |
| 1844 | 308.85 | 64.97 | 49.11 | 35.29 | 30.78 |
| 1846 | 309.27 | 64.99 | 49.14 | 35.31 | 30.79 |
| 1848 | 309.78 | 65.06 | 49.2  | 35.36 | 30.83 |
| 1850 | 310.15 | 65.04 | 49.18 | 35.34 | 30.79 |
| 1852 | 310.57 | 65.06 | 49.21 | 35.35 | 30.8  |
| 1854 | 311.02 | 65.1  | 49.24 | 35.38 | 30.82 |
| 1856 | 311.56 | 65.17 | 49.3  | 35.43 | 30.87 |
| 1858 | 312.04 | 65.22 | 49.37 | 35.48 | 30.9  |
| 1860 | 312.47 | 65.22 | 49.37 | 35.48 | 30.89 |
| 1862 | 312.92 | 65.26 | 49.42 | 35.51 | 30.91 |

|      |        |       |       |       |       |
|------|--------|-------|-------|-------|-------|
| 1864 | 313.45 | 65.31 | 49.46 | 35.54 | 30.93 |
| 1866 | 313.86 | 65.34 | 49.5  | 35.56 | 30.95 |
| 1868 | 314.28 | 65.36 | 49.53 | 35.58 | 30.96 |
| 1870 | 314.72 | 65.39 | 49.55 | 35.59 | 30.97 |
| 1872 | 315.23 | 65.44 | 49.58 | 35.62 | 30.98 |
| 1874 | 315.67 | 65.46 | 49.62 | 35.64 | 30.99 |
| 1876 | 316.11 | 65.49 | 49.64 | 35.66 | 31.01 |
| 1878 | 316.55 | 65.53 | 49.68 | 35.68 | 31.02 |
| 1880 | 317.08 | 65.59 | 49.76 | 35.73 | 31.07 |
| 1882 | 317.51 | 65.61 | 49.79 | 35.76 | 31.08 |
| 1884 | 317.92 | 65.62 | 49.8  | 35.77 | 31.09 |
| 1886 | 318.36 | 65.67 | 49.85 | 35.81 | 31.11 |
| 1888 | 318.85 | 65.7  | 49.88 | 35.81 | 31.1  |
| 1890 | 319.28 | 65.71 | 49.88 | 35.81 | 31.1  |
| 1892 | 319.75 | 65.75 | 49.93 | 35.86 | 31.13 |
| 1894 | 320.26 | 65.76 | 49.94 | 35.86 | 31.13 |
| 1896 | 320.7  | 65.8  | 49.97 | 35.88 | 31.14 |
| 1898 | 321.16 | 65.83 | 50.01 | 35.92 | 31.16 |
| 1900 | 321.57 | 65.87 | 50.05 | 35.95 | 31.18 |
| 1902 | 322.02 | 65.94 | 50.12 | 36.01 | 31.23 |
| 1904 | 322.5  | 65.96 | 50.13 | 36.02 | 31.21 |
| 1906 | 322.97 | 66    | 50.18 | 36.05 | 31.24 |
| 1908 | 323.39 | 65.99 | 50.17 | 36.03 | 31.22 |
| 1910 | 323.85 | 66.01 | 50.2  | 36.06 | 31.24 |
| 1912 | 324.4  | 66.07 | 50.26 | 36.1  | 31.27 |
| 1914 | 324.86 | 66.15 | 50.33 | 36.15 | 31.31 |
| 1916 | 325.25 | 66.15 | 50.33 | 36.14 | 31.31 |
| 1918 | 325.68 | 66.19 | 50.37 | 36.16 | 31.34 |
| 1920 | 326.14 | 66.18 | 50.36 | 36.15 | 31.31 |
| 1922 | 326.59 | 66.2  | 50.39 | 36.17 | 31.32 |
| 1924 | 327.03 | 66.2  | 50.41 | 36.17 | 31.3  |
| 1926 | 327.57 | 66.24 | 50.44 | 36.2  | 31.32 |
| 1928 | 328.02 | 66.29 | 50.48 | 36.23 | 31.34 |
| 1930 | 328.47 | 66.33 | 50.53 | 36.26 | 31.36 |
| 1932 | 328.89 | 66.34 | 50.56 | 36.29 | 31.38 |
| 1934 | 329.32 | 66.37 | 50.58 | 36.31 | 31.39 |
| 1936 | 329.75 | 66.42 | 50.64 | 36.35 | 31.42 |
| 1938 | 330.23 | 66.44 | 50.65 | 36.36 | 31.42 |
| 1940 | 330.7  | 66.46 | 50.67 | 36.39 | 31.43 |
| 1942 | 331.18 | 66.51 | 50.72 | 36.42 | 31.45 |
| 1944 | 331.69 | 66.52 | 50.72 | 36.41 | 31.44 |
| 1946 | 332.14 | 66.55 | 50.77 | 36.44 | 31.45 |
| 1948 | 332.58 | 66.58 | 50.79 | 36.46 | 31.46 |
| 1950 | 333    | 66.61 | 50.82 | 36.47 | 31.47 |

|      |        |       |       |       |       |
|------|--------|-------|-------|-------|-------|
| 1952 | 333.47 | 66.64 | 50.85 | 36.5  | 31.48 |
| 1954 | 333.89 | 66.66 | 50.88 | 36.51 | 31.49 |
| 1956 | 334.33 | 66.68 | 50.92 | 36.53 | 31.51 |
| 1958 | 334.9  | 66.74 | 50.97 | 36.57 | 31.53 |
| 1960 | 335.37 | 66.8  | 51.03 | 36.62 | 31.56 |
| 1962 | 335.79 | 66.79 | 51.02 | 36.61 | 31.54 |
| 1964 | 336.21 | 66.8  | 51.05 | 36.63 | 31.56 |
| 1966 | 336.67 | 66.86 | 51.1  | 36.67 | 31.59 |
| 1968 | 337.17 | 66.9  | 51.13 | 36.69 | 31.6  |
| 1970 | 337.58 | 66.92 | 51.16 | 36.72 | 31.61 |
| 1972 | 337.99 | 66.96 | 51.19 | 36.74 | 31.62 |
| 1974 | 338.45 | 67    | 51.24 | 36.8  | 31.66 |
| 1976 | 338.86 | 66.99 | 51.22 | 36.77 | 31.63 |
| 1978 | 339.4  | 67.04 | 51.27 | 36.81 | 31.65 |
| 1980 | 339.83 | 67.08 | 51.3  | 36.83 | 31.68 |
| 1982 | 340.31 | 67.09 | 51.31 | 36.84 | 31.67 |
| 1984 | 340.73 | 67.13 | 51.34 | 36.87 | 31.68 |
| 1986 | 341.15 | 67.14 | 51.37 | 36.87 | 31.69 |
| 1988 | 341.62 | 67.2  | 51.43 | 36.92 | 31.73 |
| 1990 | 342.07 | 67.26 | 51.49 | 36.96 | 31.76 |
| 1992 | 342.54 | 67.25 | 51.48 | 36.95 | 31.77 |
| 1994 | 342.98 | 67.27 | 51.51 | 36.96 | 31.75 |
| 1996 | 343.38 | 67.28 | 51.52 | 36.97 | 31.75 |
| 1998 | 343.8  | 67.29 | 51.55 | 36.99 | 31.76 |
| 2000 | 344.32 | 67.35 | 51.62 | 37.03 | 31.8  |
| 2002 | 344.73 | 67.41 | 51.67 | 37.09 | 31.84 |
| 2004 | 345.14 | 67.42 | 51.67 | 37.09 | 31.84 |
| 2006 | 345.6  | 67.46 | 51.71 | 37.13 | 31.85 |
| 2008 | 346.14 | 67.49 | 51.75 | 37.17 | 31.86 |
| 2010 | 346.58 | 67.51 | 51.76 | 37.17 | 31.86 |
| 2012 | 347.02 | 67.54 | 51.8  | 37.2  | 31.89 |
| 2014 | 347.46 | 67.59 | 51.84 | 37.23 | 31.92 |
| 2016 | 347.93 | 67.63 | 51.87 | 37.26 | 31.92 |
| 2018 | 348.31 | 67.63 | 51.88 | 37.26 | 31.92 |
| 2020 | 348.75 | 67.67 | 51.93 | 37.3  | 31.95 |
| 2022 | 349.19 | 67.69 | 51.96 | 37.32 | 31.96 |
| 2024 | 349.72 | 67.72 | 51.99 | 37.33 | 31.97 |
| 2026 | 350.12 | 67.69 | 51.97 | 37.31 | 31.94 |
| 2028 | 350.6  | 67.75 | 52.04 | 37.37 | 31.99 |
| 2030 | 351.03 | 67.78 | 52.08 | 37.39 | 32    |
| 2032 | 351.54 | 67.82 | 52.12 | 37.42 | 32.03 |
| 2034 | 351.96 | 67.85 | 52.16 | 37.46 | 32.06 |
| 2036 | 352.34 | 67.85 | 52.17 | 37.47 | 32.05 |
| 2038 | 352.82 | 67.89 | 52.2  | 37.49 | 32.05 |

|      |        |       |       |       |       |
|------|--------|-------|-------|-------|-------|
| 2040 | 353.3  | 67.96 | 52.26 | 37.55 | 32.1  |
| 2042 | 353.77 | 68    | 52.32 | 37.6  | 32.12 |
| 2044 | 354.18 | 67.99 | 52.3  | 37.58 | 32.11 |
| 2046 | 354.66 | 68.05 | 52.37 | 37.63 | 32.14 |
| 2048 | 355.15 | 68.06 | 52.38 | 37.64 | 32.14 |
| 2050 | 355.58 | 68.11 | 52.44 | 37.69 | 32.18 |
| 2052 | 355.96 | 68.11 | 52.43 | 37.68 | 32.16 |
| 2054 | 356.37 | 68.15 | 52.48 | 37.7  | 32.19 |
| 2056 | 356.83 | 68.13 | 52.46 | 37.69 | 32.18 |
| 2058 | 357.31 | 68.19 | 52.55 | 37.75 | 32.23 |
| 2060 | 357.72 | 68.18 | 52.54 | 37.74 | 32.21 |
| 2062 | 358.17 | 68.21 | 52.57 | 37.76 | 32.23 |
| 2064 | 358.72 | 68.27 | 52.61 | 37.81 | 32.27 |
| 2066 | 359.12 | 68.27 | 52.63 | 37.82 | 32.26 |
| 2068 | 359.52 | 68.29 | 52.67 | 37.84 | 32.27 |
| 2070 | 359.95 | 68.34 | 52.72 | 37.89 | 32.31 |
| 2072 | 360.41 | 68.37 | 52.75 | 37.92 | 32.32 |
| 2074 | 360.84 | 68.38 | 52.76 | 37.93 | 32.31 |
| 2076 | 361.3  | 68.41 | 52.79 | 37.95 | 32.33 |
| 2078 | 361.75 | 68.45 | 52.83 | 37.98 | 32.36 |
| 2080 | 362.26 | 68.47 | 52.86 | 38    | 32.38 |
| 2082 | 362.68 | 68.5  | 52.89 | 38.03 | 32.39 |
| 2084 | 363.1  | 68.55 | 52.94 | 38.09 | 32.42 |
| 2086 | 363.47 | 68.57 | 52.95 | 38.09 | 32.42 |
| 2088 | 363.93 | 68.58 | 52.97 | 38.1  | 32.42 |
| 2090 | 364.36 | 68.61 | 53.01 | 38.12 | 32.43 |
| 2092 | 364.81 | 68.62 | 53.03 | 38.14 | 32.45 |
| 2094 | 365.28 | 68.67 | 53.08 | 38.19 | 32.48 |
| 2096 | 365.78 | 68.69 | 53.1  | 38.2  | 32.49 |
| 2098 | 366.2  | 68.72 | 53.13 | 38.23 | 32.5  |
| 2100 | 366.61 | 68.73 | 53.14 | 38.24 | 32.51 |
| 2102 | 367    | 68.76 | 53.17 | 38.25 | 32.51 |
| 2104 | 367.5  | 68.84 | 53.25 | 38.33 | 32.57 |
| 2106 | 367.86 | 68.82 | 53.24 | 38.31 | 32.55 |
| 2108 | 368.29 | 68.84 | 53.26 | 38.32 | 32.55 |
| 2110 | 368.73 | 68.86 | 53.28 | 38.34 | 32.56 |
| 2112 | 369.24 | 68.88 | 53.3  | 38.35 | 32.56 |
| 2114 | 369.66 | 68.91 | 53.34 | 38.38 | 32.58 |
| 2116 | 370.08 | 68.95 | 53.36 | 38.41 | 32.59 |
| 2118 | 370.55 | 68.99 | 53.39 | 38.45 | 32.63 |
| 2120 | 370.94 | 69.01 | 53.42 | 38.45 | 32.63 |
| 2122 | 371.33 | 69.03 | 53.45 | 38.47 | 32.64 |
| 2124 | 371.74 | 69.06 | 53.47 | 38.49 | 32.65 |
| 2126 | 372.17 | 69.08 | 53.5  | 38.51 | 32.66 |



|      |        |       |       |       |       |
|------|--------|-------|-------|-------|-------|
| 2128 | 372.7  | 69.13 | 53.55 | 38.55 | 32.68 |
| 2130 | 373.12 | 69.16 | 53.59 | 38.58 | 32.71 |
| 2132 | 373.51 | 69.17 | 53.58 | 38.57 | 32.7  |
| 2134 | 373.92 | 69.2  | 53.63 | 38.61 | 32.72 |
| 2136 | 374.35 | 69.22 | 53.65 | 38.61 | 32.72 |
| 2138 | 374.76 | 69.28 | 53.69 | 38.66 | 32.76 |
| 2140 | 375.16 | 69.31 | 53.72 | 38.68 | 32.76 |
| 2142 | 375.6  | 69.34 | 53.75 | 38.71 | 32.77 |
| 2144 | 376.13 | 69.4  | 53.8  | 38.76 | 32.8  |
| 2146 | 376.54 | 69.41 | 53.83 | 38.77 | 32.82 |
| 2148 | 376.97 | 69.46 | 53.87 | 38.81 | 32.85 |
| 2150 | 377.37 | 69.49 | 53.88 | 38.82 | 32.85 |
| 2152 | 377.74 | 69.5  | 53.9  | 38.83 | 32.87 |
| 2154 | 378.14 | 69.49 | 53.9  | 38.81 | 32.83 |
| 2156 | 378.53 | 69.54 | 53.93 | 38.85 | 32.85 |
| 2158 | 378.99 | 69.6  | 53.98 | 38.89 | 32.89 |
| 2160 | 379.41 | 69.63 | 54.01 | 38.92 | 32.92 |
| 2162 | 379.93 | 69.68 | 54.06 | 38.96 | 32.94 |
| 2164 | 380.34 | 69.71 | 54.08 | 38.97 | 32.93 |
| 2166 | 380.75 | 69.74 | 54.11 | 39    | 32.96 |
| 2168 | 381.19 | 69.75 | 54.13 | 39    | 32.96 |
| 2170 | 381.53 | 69.75 | 54.11 | 38.99 | 32.94 |
| 2172 | 381.94 | 69.83 | 54.18 | 39.05 | 32.99 |
| 2174 | 382.34 | 69.87 | 54.22 | 39.08 | 33.01 |
| 2176 | 382.85 | 69.91 | 54.24 | 39.11 | 33.02 |
| 2178 | 383.27 | 69.93 | 54.26 | 39.12 | 33.01 |
| 2180 | 383.7  | 69.95 | 54.29 | 39.14 | 33.04 |
| 2182 | 384.13 | 70.01 | 54.33 | 39.18 | 33.07 |
| 2184 | 384.57 | 70.03 | 54.34 | 39.18 | 33.05 |
| 2186 | 384.96 | 70.07 | 54.37 | 39.21 | 33.06 |
| 2188 | 385.34 | 70.12 | 54.41 | 39.24 | 33.1  |
| 2190 | 385.72 | 70.14 | 54.42 | 39.26 | 33.1  |
| 2192 | 386.21 | 70.16 | 54.46 | 39.29 | 33.11 |
| 2194 | 386.62 | 70.21 | 54.49 | 39.31 | 33.12 |
| 2196 | 387.04 | 70.24 | 54.52 | 39.34 | 33.15 |
| 2198 | 387.5  | 70.27 | 54.54 | 39.36 | 33.15 |
| 2200 | 387.88 | 70.31 | 54.57 | 39.38 | 33.16 |
| 2202 | 388.27 | 70.33 | 54.6  | 39.39 | 33.18 |
| 2204 | 388.65 | 70.36 | 54.62 | 39.41 | 33.19 |
| 2206 | 389.12 | 70.43 | 54.68 | 39.46 | 33.22 |
| 2208 | 389.51 | 70.44 | 54.69 | 39.47 | 33.22 |
| 2210 | 389.9  | 70.46 | 54.7  | 39.47 | 33.21 |
| 2212 | 390.3  | 70.49 | 54.72 | 39.49 | 33.21 |
| 2214 | 390.72 | 70.55 | 54.77 | 39.52 | 33.25 |

|      |        |       |       |       |       |
|------|--------|-------|-------|-------|-------|
| 2216 | 391.12 | 70.55 | 54.76 | 39.5  | 33.23 |
| 2218 | 391.49 | 70.6  | 54.79 | 39.53 | 33.22 |
| 2220 | 391.87 | 70.64 | 54.84 | 39.58 | 33.27 |
| 2222 | 392.29 | 70.69 | 54.87 | 39.61 | 33.29 |
| 2224 | 392.77 | 70.73 | 54.91 | 39.63 | 33.3  |
| 2226 | 393.19 | 70.79 | 54.94 | 39.66 | 33.33 |
| 2228 | 393.58 | 70.8  | 54.96 | 39.68 | 33.33 |
| 2230 | 393.97 | 70.85 | 54.97 | 39.69 | 33.33 |
| 2232 | 394.32 | 70.88 | 55.01 | 39.71 | 33.35 |
| 2234 | 394.75 | 70.91 | 55.04 | 39.73 | 33.36 |
| 2236 | 395.13 | 70.95 | 55.07 | 39.75 | 33.37 |
| 2238 | 395.57 | 71.03 | 55.13 | 39.83 | 33.44 |
| 2240 | 396.03 | 71.05 | 55.14 | 39.83 | 33.43 |
| 2242 | 396.45 | 71.11 | 55.18 | 39.87 | 33.43 |
| 2244 | 396.81 | 71.12 | 55.18 | 39.86 | 33.43 |
| 2246 | 397.2  | 71.18 | 55.23 | 39.89 | 33.45 |
| 2248 | 397.62 | 71.21 | 55.25 | 39.91 | 33.48 |
| 2250 | 398    | 71.27 | 55.3  | 39.93 | 33.49 |
| 2252 | 398.35 | 71.29 | 55.3  | 39.95 | 33.47 |
| 2254 | 398.79 | 71.36 | 55.35 | 40    | 33.49 |
| 2256 | 399.29 | 71.43 | 55.4  | 40.05 | 33.54 |
| 2258 | 399.68 | 71.47 | 55.43 | 40.05 | 33.54 |
| 2260 | 400.03 | 71.5  | 55.42 | 40.07 | 33.54 |
| 2262 | 400.38 | 71.53 | 55.43 | 40.07 | 33.54 |
| 2264 | 400.82 | 71.61 | 55.48 | 40.11 | 33.56 |
| 2266 | 401.18 | 71.64 | 55.51 | 40.12 | 33.58 |
| 2268 | 401.56 | 71.67 | 55.56 | 40.14 | 33.6  |
| 2270 | 402.01 | 71.75 | 55.61 | 40.19 | 33.65 |
| 2272 | 402.42 | 71.8  | 55.63 | 40.21 | 33.65 |
| 2274 | 402.88 | 71.86 | 55.65 | 40.22 | 33.66 |
| 2276 | 403.28 | 71.91 | 55.7  | 40.26 | 33.68 |
| 2278 | 403.65 | 71.96 | 55.72 | 40.28 | 33.7  |
| 2280 | 404.04 | 71.99 | 55.74 | 40.29 | 33.68 |
| 2282 | 404.41 | 72.05 | 55.77 | 40.32 | 33.71 |
| 2284 | 404.81 | 72.12 | 55.8  | 40.35 | 33.72 |
| 2286 | 405.25 | 72.18 | 55.84 | 40.38 | 33.74 |
| 2288 | 405.73 | 72.26 | 55.88 | 40.41 | 33.77 |
| 2290 | 406.07 | 72.25 | 55.85 | 40.37 | 33.71 |
| 2292 | 406.5  | 72.35 | 55.92 | 40.45 | 33.77 |
| 2294 | 406.86 | 72.42 | 55.95 | 40.48 | 33.79 |
| 2296 | 407.26 | 72.5  | 55.98 | 40.49 | 33.8  |
| 2298 | 407.61 | 72.52 | 55.98 | 40.49 | 33.81 |
| 2300 | 408.05 | 72.59 | 56.03 | 40.52 | 33.83 |
| 2302 | 408.46 | 72.66 | 56.05 | 40.55 | 33.84 |

|      |        |       |       |       |       |
|------|--------|-------|-------|-------|-------|
| 2304 | 408.96 | 72.73 | 56.09 | 40.57 | 33.85 |
| 2306 | 409.38 | 72.81 | 56.13 | 40.6  | 33.87 |
| 2308 | 409.76 | 72.85 | 56.15 | 40.61 | 33.88 |
| 2310 | 410.14 | 72.92 | 56.17 | 40.63 | 33.9  |
| 2312 | 410.56 | 72.99 | 56.2  | 40.66 | 33.92 |
| 2314 | 410.92 | 73.09 | 56.24 | 40.7  | 33.92 |
| 2316 | 411.31 | 73.17 | 56.27 | 40.72 | 33.95 |
| 2318 | 411.77 | 73.28 | 56.33 | 40.78 | 33.99 |
| 2320 | 412.27 | 73.39 | 56.37 | 40.81 | 34.02 |
| 2322 | 412.64 | 73.43 | 56.37 | 40.81 | 33.99 |
| 2324 | 413    | 73.5  | 56.37 | 40.81 | 33.99 |
| 2326 | 413.42 | 73.6  | 56.41 | 40.85 | 34.02 |
| 2328 | 413.72 | 73.71 | 56.46 | 40.9  | 34.05 |
| 2330 | 414.12 | 73.77 | 56.47 | 40.9  | 34.04 |
| 2332 | 414.56 | 73.86 | 56.51 | 40.93 | 34.06 |
| 2334 | 415    | 73.98 | 56.56 | 40.95 | 34.1  |
| 2336 | 415.4  | 74.04 | 56.55 | 40.94 | 34.07 |
| 2338 | 415.9  | 74.16 | 56.59 | 40.98 | 34.1  |
| 2340 | 416.27 | 74.22 | 56.59 | 40.98 | 34.08 |
| 2342 | 416.64 | 74.31 | 56.61 | 40.99 | 34.09 |
| 2344 | 417.08 | 74.4  | 56.64 | 41    | 34.1  |
| 2346 | 417.42 | 74.52 | 56.67 | 41.03 | 34.11 |
| 2348 | 417.81 | 74.66 | 56.72 | 41.08 | 34.14 |
| 2350 | 418.23 | 74.79 | 56.75 | 41.11 | 34.16 |
| 2352 | 418.78 | 74.95 | 56.8  | 41.17 | 34.2  |
| 2354 | 419.22 | 75.05 | 56.84 | 41.19 | 34.22 |
| 2356 | 419.65 | 75.17 | 56.87 | 41.22 | 34.23 |
| 2358 | 420.06 | 75.29 | 56.89 | 41.24 | 34.24 |
| 2360 | 420.5  | 75.47 | 56.94 | 41.29 | 34.26 |
| 2362 | 420.85 | 75.57 | 56.94 | 41.29 | 34.26 |
| 2364 | 421.2  | 75.68 | 56.97 | 41.29 | 34.27 |
| 2366 | 421.58 | 75.8  | 57    | 41.32 | 34.28 |
| 2368 | 422.07 | 75.92 | 57.02 | 41.34 | 34.29 |
| 2370 | 422.49 | 76.06 | 57.04 | 41.35 | 34.3  |
| 2372 | 422.94 | 76.2  | 57.08 | 41.39 | 34.32 |
| 2374 | 423.3  | 76.3  | 57.07 | 41.38 | 34.28 |
| 2376 | 423.71 | 76.4  | 57.08 | 41.38 | 34.27 |
| 2378 | 424.11 | 76.62 | 57.14 | 41.45 | 34.33 |
| 2380 | 424.42 | 76.72 | 57.13 | 41.43 | 34.29 |
| 2382 | 424.86 | 76.9  | 57.2  | 41.5  | 34.35 |
| 2384 | 425.36 | 77.05 | 57.23 | 41.53 | 34.36 |
| 2386 | 425.75 | 77.15 | 57.21 | 41.51 | 34.33 |
| 2388 | 426.16 | 77.3  | 57.25 | 41.53 | 34.33 |
| 2390 | 426.55 | 77.44 | 57.27 | 41.54 | 34.35 |

|      |        |       |       |       |       |
|------|--------|-------|-------|-------|-------|
| 2392 | 426.97 | 77.61 | 57.31 | 41.58 | 34.38 |
| 2394 | 427.33 | 77.77 | 57.32 | 41.58 | 34.37 |
| 2396 | 427.71 | 77.92 | 57.35 | 41.61 | 34.37 |
| 2398 | 428.12 | 78.09 | 57.37 | 41.63 | 34.39 |
| 2400 | 428.64 | 78.29 | 57.42 | 41.67 | 34.4  |
| 2402 | 429.05 | 78.45 | 57.43 | 41.68 | 34.41 |
| 2404 | 429.47 | 78.63 | 57.46 | 41.72 | 34.43 |
| 2406 | 429.86 | 78.8  | 57.49 | 41.75 | 34.44 |
| 2408 | 430.28 | 79.03 | 57.54 | 41.79 | 34.46 |
| 2410 | 430.67 | 79.24 | 57.58 | 41.85 | 34.51 |
| 2412 | 431.05 | 79.4  | 57.6  | 41.84 | 34.49 |
| 2414 | 431.45 | 79.54 | 57.59 | 41.85 | 34.48 |
| 2416 | 431.97 | 79.78 | 57.65 | 41.89 | 34.52 |
| 2418 | 432.37 | 79.94 | 57.65 | 41.88 | 34.5  |
| 2420 | 432.79 | 80.15 | 57.69 | 41.92 | 34.53 |
| 2422 | 433.18 | 80.34 | 57.72 | 41.93 | 34.54 |
| 2424 | 433.59 | 80.51 | 57.72 | 41.94 | 34.52 |
| 2426 | 433.96 | 80.74 | 57.74 | 41.96 | 34.53 |
| 2428 | 434.36 | 80.96 | 57.76 | 41.99 | 34.54 |
| 2430 | 434.79 | 81.15 | 57.79 | 42.01 | 34.55 |
| 2432 | 435.3  | 81.38 | 57.81 | 42.04 | 34.56 |
| 2434 | 435.71 | 81.59 | 57.83 | 42.06 | 34.57 |
| 2436 | 436.12 | 81.81 | 57.88 | 42.1  | 34.59 |
| 2438 | 436.49 | 82.03 | 57.91 | 42.14 | 34.61 |
| 2440 | 436.82 | 82.24 | 57.92 | 42.14 | 34.6  |
| 2442 | 437.26 | 82.55 | 57.99 | 42.23 | 34.68 |
| 2444 | 437.59 | 82.78 | 58.04 | 42.26 | 34.69 |
| 2446 | 437.88 | 83    | 58.06 | 42.28 | 34.7  |
| 2448 | 438.18 | 83.22 | 58.08 | 42.3  | 34.71 |
| 2450 | 438.44 | 83.48 | 58.11 | 42.32 | 34.72 |
| 2452 | 438.67 | 83.7  | 58.14 | 42.35 | 34.73 |
| 2454 | 438.87 | 83.91 | 58.15 | 42.35 | 34.72 |
| 2456 | 439.09 | 84.14 | 58.17 | 42.37 | 34.72 |
| 2458 | 439.29 | 84.42 | 58.2  | 42.39 | 34.75 |
| 2460 | 439.46 | 84.65 | 58.23 | 42.42 | 34.76 |
| 2462 | 439.63 | 84.9  | 58.25 | 42.44 | 34.77 |
| 2464 | 439.79 | 85.18 | 58.28 | 42.46 | 34.78 |
| 2466 | 439.91 | 85.41 | 58.29 | 42.48 | 34.79 |
| 2468 | 440.02 | 85.67 | 58.33 | 42.52 | 34.81 |
| 2470 | 440.12 | 85.91 | 58.35 | 42.54 | 34.81 |
| 2472 | 440.24 | 86.19 | 58.4  | 42.6  | 34.86 |
| 2474 | 440.3  | 86.47 | 58.41 | 42.61 | 34.87 |
| 2476 | 440.33 | 86.7  | 58.4  | 42.61 | 34.85 |
| 2478 | 440.4  | 86.97 | 58.44 | 42.65 | 34.87 |

|      |        |       |       |       |       |
|------|--------|-------|-------|-------|-------|
| 2480 | 440.44 | 87.25 | 58.49 | 42.69 | 34.9  |
| 2482 | 440.42 | 87.52 | 58.49 | 42.69 | 34.88 |
| 2484 | 440.43 | 87.8  | 58.53 | 42.73 | 34.91 |
| 2486 | 440.39 | 88.04 | 58.51 | 42.73 | 34.9  |
| 2488 | 440.34 | 88.3  | 58.54 | 42.74 | 34.89 |
| 2490 | 440.28 | 88.58 | 58.53 | 42.75 | 34.88 |
| 2492 | 440.23 | 88.85 | 58.56 | 42.77 | 34.9  |
| 2494 | 440.18 | 89.14 | 58.59 | 42.81 | 34.92 |
| 2496 | 440.08 | 89.4  | 58.61 | 42.83 | 34.92 |
| 2498 | 439.94 | 89.67 | 58.58 | 42.81 | 34.89 |
| 2500 | 439.85 | 89.95 | 58.6  | 42.84 | 34.92 |
| 2502 | 439.74 | 90.24 | 58.64 | 42.88 | 34.94 |
| 2504 | 439.58 | 90.57 | 58.65 | 42.9  | 34.96 |
| 2506 | 439.42 | 90.83 | 58.66 | 42.91 | 34.96 |
| 2508 | 439.28 | 91.11 | 58.68 | 42.96 | 34.97 |
| 2510 | 439.13 | 91.4  | 58.7  | 43    | 34.99 |
| 2512 | 438.93 | 91.65 | 58.69 | 42.99 | 34.99 |
| 2514 | 438.72 | 91.98 | 58.71 | 43.01 | 34.99 |
| 2516 | 438.51 | 92.24 | 58.71 | 43.02 | 34.99 |
| 2518 | 438.3  | 92.52 | 58.71 | 43.04 | 35    |
| 2520 | 438.08 | 92.8  | 58.72 | 43.07 | 35.02 |
| 2522 | 437.81 | 93.11 | 58.72 | 43.09 | 35.02 |
| 2524 | 437.56 | 93.38 | 58.71 | 43.11 | 35.03 |
| 2526 | 437.31 | 93.65 | 58.71 | 43.13 | 35.04 |
| 2528 | 436.98 | 93.92 | 58.71 | 43.14 | 35.04 |
| 2530 | 436.69 | 94.21 | 58.69 | 43.13 | 35.02 |
| 2532 | 436.43 | 94.51 | 58.7  | 43.17 | 35.05 |
| 2534 | 436.14 | 94.78 | 58.7  | 43.19 | 35.07 |
| 2536 | 435.77 | 95.07 | 58.67 | 43.19 | 35.05 |
| 2538 | 435.53 | 95.31 | 58.67 | 43.22 | 35.08 |
| 2540 | 435.15 | 95.62 | 58.67 | 43.24 | 35.08 |
| 2542 | 434.82 | 95.88 | 58.65 | 43.26 | 35.09 |
| 2544 | 434.46 | 96.12 | 58.61 | 43.25 | 35.06 |
| 2546 | 434.04 | 96.4  | 58.57 | 43.25 | 35.06 |
| 2548 | 433.7  | 96.68 | 58.57 | 43.28 | 35.08 |
| 2550 | 433.34 | 96.95 | 58.57 | 43.3  | 35.1  |
| 2552 | 432.95 | 97.18 | 58.51 | 43.27 | 35.05 |
| 2554 | 432.5  | 97.48 | 58.49 | 43.29 | 35.06 |
| 2556 | 432.14 | 97.78 | 58.51 | 43.34 | 35.1  |
| 2558 | 431.76 | 98.02 | 58.49 | 43.36 | 35.1  |
| 2560 | 431.31 | 98.27 | 58.45 | 43.36 | 35.1  |
| 2562 | 430.92 | 98.57 | 58.44 | 43.39 | 35.12 |
| 2564 | 430.5  | 98.82 | 58.42 | 43.39 | 35.13 |
| 2566 | 430.11 | 99.09 | 58.41 | 43.44 | 35.15 |

|      |        |        |       |       |       |
|------|--------|--------|-------|-------|-------|
| 2568 | 429.71 | 99.35  | 58.41 | 43.48 | 35.16 |
| 2570 | 429.22 | 99.6   | 58.39 | 43.49 | 35.16 |
| 2572 | 428.78 | 99.86  | 58.31 | 43.46 | 35.12 |
| 2574 | 428.33 | 100.1  | 58.29 | 43.47 | 35.14 |
| 2576 | 427.88 | 100.34 | 58.27 | 43.5  | 35.15 |
| 2578 | 427.37 | 100.63 | 58.26 | 43.52 | 35.15 |
| 2580 | 426.93 | 100.87 | 58.24 | 43.55 | 35.18 |
| 2582 | 426.49 | 101.12 | 58.2  | 43.57 | 35.19 |
| 2584 | 425.93 | 101.31 | 58.14 | 43.54 | 35.17 |
| 2586 | 425.49 | 101.63 | 58.14 | 43.59 | 35.19 |
| 2588 | 425.02 | 101.86 | 58.11 | 43.6  | 35.2  |
| 2590 | 424.55 | 102.09 | 58.08 | 43.61 | 35.21 |
| 2592 | 423.97 | 102.35 | 58.04 | 43.61 | 35.19 |
| 2594 | 423.51 | 102.58 | 58.01 | 43.63 | 35.22 |
| 2596 | 423.03 | 102.8  | 57.98 | 43.63 | 35.22 |
| 2598 | 422.54 | 103.03 | 57.95 | 43.64 | 35.22 |
| 2600 | 422.05 | 103.24 | 57.92 | 43.65 | 35.23 |
| 2602 | 421.48 | 103.49 | 57.88 | 43.66 | 35.23 |
| 2604 | 420.99 | 103.69 | 57.84 | 43.68 | 35.23 |
| 2606 | 420.49 | 103.91 | 57.81 | 43.7  | 35.23 |
| 2608 | 419.95 | 104.16 | 57.83 | 43.75 | 35.28 |
| 2610 | 419.42 | 104.41 | 57.79 | 43.75 | 35.28 |
| 2612 | 418.88 | 104.59 | 57.71 | 43.71 | 35.25 |
| 2614 | 418.42 | 104.83 | 57.72 | 43.77 | 35.29 |
| 2616 | 417.91 | 105.04 | 57.67 | 43.77 | 35.3  |
| 2618 | 417.31 | 105.23 | 57.64 | 43.78 | 35.29 |
| 2620 | 416.76 | 105.46 | 57.59 | 43.77 | 35.27 |
| 2622 | 416.26 | 105.67 | 57.56 | 43.8  | 35.3  |
| 2624 | 415.67 | 105.89 | 57.55 | 43.83 | 35.3  |
| 2626 | 415.16 | 106.11 | 57.5  | 43.83 | 35.31 |
| 2628 | 414.64 | 106.32 | 57.47 | 43.85 | 35.32 |
| 2630 | 414.07 | 106.47 | 57.41 | 43.81 | 35.29 |
| 2632 | 413.47 | 106.67 | 57.39 | 43.86 | 35.32 |
| 2634 | 412.96 | 106.91 | 57.37 | 43.86 | 35.32 |
| 2636 | 412.43 | 107.1  | 57.33 | 43.88 | 35.34 |
| 2638 | 411.9  | 107.28 | 57.3  | 43.87 | 35.33 |
| 2640 | 411.37 | 107.47 | 57.28 | 43.9  | 35.36 |
| 2642 | 410.75 | 107.65 | 57.25 | 43.9  | 35.36 |
| 2644 | 410.21 | 107.87 | 57.22 | 43.92 | 35.38 |
| 2646 | 409.66 | 108.03 | 57.17 | 43.92 | 35.37 |
| 2648 | 409.13 | 108.21 | 57.16 | 43.93 | 35.38 |
| 2650 | 408.5  | 108.41 | 57.12 | 43.93 | 35.38 |
| 2652 | 407.95 | 108.58 | 57.07 | 43.94 | 35.37 |
| 2654 | 407.42 | 108.76 | 57.06 | 43.95 | 35.38 |

|      |        |        |       |       |       |
|------|--------|--------|-------|-------|-------|
| 2656 | 406.86 | 108.92 | 57.01 | 43.94 | 35.36 |
| 2658 | 406.2  | 109.09 | 56.96 | 43.94 | 35.36 |
| 2660 | 405.67 | 109.26 | 56.94 | 43.94 | 35.37 |
| 2662 | 405.13 | 109.43 | 56.91 | 43.94 | 35.37 |
| 2664 | 404.47 | 109.56 | 56.84 | 43.93 | 35.36 |
| 2666 | 403.96 | 109.8  | 56.87 | 43.97 | 35.4  |
| 2668 | 403.42 | 109.96 | 56.84 | 43.98 | 35.41 |
| 2670 | 402.85 | 110.11 | 56.8  | 43.98 | 35.4  |
| 2672 | 402.3  | 110.26 | 56.77 | 43.97 | 35.39 |
| 2674 | 401.68 | 110.43 | 56.75 | 43.98 | 35.42 |
| 2676 | 401.14 | 110.61 | 56.72 | 43.98 | 35.42 |
| 2678 | 400.58 | 110.75 | 56.69 | 43.97 | 35.41 |
| 2680 | 399.92 | 110.9  | 56.64 | 43.96 | 35.4  |
| 2682 | 399.36 | 111.05 | 56.61 | 43.96 | 35.39 |
| 2684 | 398.83 | 111.23 | 56.61 | 43.99 | 35.43 |
| 2686 | 398.28 | 111.37 | 56.59 | 44    | 35.43 |
| 2688 | 397.7  | 111.48 | 56.54 | 43.97 | 35.4  |
| 2690 | 397.1  | 111.69 | 56.54 | 44    | 35.43 |
| 2692 | 396.53 | 111.82 | 56.5  | 44    | 35.43 |
| 2694 | 395.96 | 111.94 | 56.46 | 43.98 | 35.41 |
| 2696 | 395.43 | 112.1  | 56.46 | 44    | 35.44 |
| 2698 | 394.76 | 112.21 | 56.41 | 43.99 | 35.42 |
| 2700 | 394.24 | 112.39 | 56.41 | 44.02 | 35.45 |
| 2702 | 393.69 | 112.53 | 56.39 | 44.02 | 35.46 |
| 2704 | 393.13 | 112.65 | 56.36 | 44.01 | 35.46 |
| 2706 | 392.49 | 112.8  | 56.35 | 44.01 | 35.46 |
| 2708 | 391.93 | 112.91 | 56.3  | 43.99 | 35.46 |
| 2710 | 391.38 | 113.04 | 56.29 | 44.01 | 35.47 |
| 2712 | 390.74 | 113.17 | 56.26 | 44.01 | 35.47 |
| 2714 | 390.19 | 113.32 | 56.25 | 44.01 | 35.47 |
| 2716 | 389.66 | 113.47 | 56.26 | 44.03 | 35.49 |
| 2718 | 389.07 | 113.56 | 56.19 | 44    | 35.47 |
| 2720 | 388.52 | 113.67 | 56.17 | 44    | 35.47 |
| 2722 | 387.88 | 113.78 | 56.15 | 44    | 35.47 |
| 2724 | 387.33 | 113.92 | 56.12 | 44    | 35.47 |
| 2726 | 386.78 | 114.04 | 56.12 | 44.02 | 35.49 |
| 2728 | 386.24 | 114.15 | 56.08 | 43.99 | 35.47 |
| 2730 | 385.62 | 114.3  | 56.08 | 44.02 | 35.5  |
| 2732 | 385.07 | 114.42 | 56.06 | 44    | 35.48 |
| 2734 | 384.51 | 114.52 | 56.02 | 44    | 35.47 |
| 2736 | 383.86 | 114.62 | 55.99 | 44    | 35.47 |
| 2738 | 383.33 | 114.75 | 55.98 | 44.01 | 35.47 |
| 2740 | 382.77 | 114.85 | 55.94 | 43.99 | 35.47 |
| 2742 | 382.26 | 114.99 | 55.97 | 44.04 | 35.51 |

|      |        |        |       |       |       |
|------|--------|--------|-------|-------|-------|
| 2744 | 381.61 | 115.11 | 55.95 | 44.04 | 35.51 |
| 2746 | 381.08 | 115.23 | 55.94 | 44.04 | 35.52 |
| 2748 | 380.54 | 115.34 | 55.91 | 44.04 | 35.52 |
| 2750 | 379.99 | 115.44 | 55.89 | 44.04 | 35.53 |
| 2752 | 379.44 | 115.53 | 55.86 | 44.02 | 35.51 |
| 2754 | 378.8  | 115.63 | 55.82 | 44    | 35.5  |
| 2756 | 378.26 | 115.73 | 55.8  | 43.99 | 35.5  |
| 2758 | 377.7  | 115.82 | 55.79 | 43.99 | 35.51 |
| 2760 | 377.17 | 115.92 | 55.77 | 44    | 35.52 |
| 2762 | 376.52 | 116.02 | 55.74 | 43.99 | 35.5  |
| 2764 | 375.97 | 116.11 | 55.71 | 43.96 | 35.49 |
| 2766 | 375.4  | 116.18 | 55.67 | 43.95 | 35.47 |
| 2768 | 374.81 | 116.3  | 55.67 | 43.97 | 35.5  |
| 2770 | 374.24 | 116.37 | 55.62 | 43.94 | 35.46 |
| 2772 | 373.71 | 116.46 | 55.6  | 43.93 | 35.47 |
| 2774 | 373.19 | 116.57 | 55.6  | 43.96 | 35.49 |
| 2776 | 372.67 | 116.68 | 55.6  | 43.97 | 35.51 |
| 2778 | 372.04 | 116.76 | 55.59 | 43.97 | 35.5  |
| 2780 | 371.5  | 116.86 | 55.56 | 43.96 | 35.5  |
| 2782 | 370.97 | 116.94 | 55.53 | 43.96 | 35.5  |
| 2784 | 370.42 | 117.02 | 55.51 | 43.94 | 35.5  |
| 2786 | 369.79 | 117.11 | 55.49 | 43.94 | 35.5  |
| 2788 | 369.27 | 117.19 | 55.47 | 43.93 | 35.5  |
| 2790 | 368.72 | 117.26 | 55.44 | 43.91 | 35.48 |
| 2792 | 368.09 | 117.32 | 55.4  | 43.89 | 35.46 |
| 2794 | 367.55 | 117.41 | 55.37 | 43.89 | 35.47 |
| 2796 | 367.03 | 117.5  | 55.37 | 43.88 | 35.48 |
| 2798 | 366.5  | 117.59 | 55.36 | 43.89 | 35.48 |
| 2800 | 365.9  | 117.67 | 55.34 | 43.89 | 35.48 |
| 2802 | 365.36 | 117.75 | 55.32 | 43.89 | 35.48 |
| 2804 | 364.84 | 117.82 | 55.29 | 43.88 | 35.48 |
| 2806 | 364.29 | 117.87 | 55.26 | 43.86 | 35.46 |
| 2808 | 363.78 | 117.95 | 55.25 | 43.87 | 35.47 |
| 2810 | 363.17 | 118.04 | 55.23 | 43.86 | 35.47 |
| 2812 | 362.64 | 118.1  | 55.21 | 43.85 | 35.46 |
| 2814 | 362.11 | 118.17 | 55.19 | 43.85 | 35.46 |
| 2816 | 361.59 | 118.23 | 55.17 | 43.84 | 35.46 |
| 2818 | 360.98 | 118.31 | 55.14 | 43.82 | 35.45 |
| 2820 | 360.45 | 118.37 | 55.11 | 43.81 | 35.46 |
| 2822 | 359.98 | 118.49 | 55.12 | 43.83 | 35.48 |
| 2824 | 359.35 | 118.51 | 55.08 | 43.8  | 35.47 |
| 2826 | 358.81 | 118.57 | 55.05 | 43.79 | 35.46 |
| 2828 | 358.28 | 118.63 | 55.03 | 43.78 | 35.45 |
| 2830 | 357.77 | 118.69 | 55.01 | 43.76 | 35.46 |



|      |        |        |       |       |       |
|------|--------|--------|-------|-------|-------|
| 2832 | 357.27 | 118.77 | 55.01 | 43.79 | 35.46 |
| 2834 | 356.67 | 118.83 | 54.99 | 43.78 | 35.46 |
| 2836 | 356.13 | 118.87 | 54.96 | 43.76 | 35.44 |
| 2838 | 355.67 | 118.98 | 54.98 | 43.79 | 35.48 |
| 2840 | 355.15 | 119.03 | 54.96 | 43.8  | 35.48 |
| 2842 | 354.52 | 119.06 | 54.91 | 43.75 | 35.43 |
| 2844 | 353.99 | 119.09 | 54.86 | 43.71 | 35.4  |
| 2846 | 353.49 | 119.14 | 54.84 | 43.7  | 35.4  |
| 2848 | 352.9  | 119.21 | 54.83 | 43.71 | 35.4  |
| 2850 | 352.39 | 119.27 | 54.81 | 43.7  | 35.4  |
| 2852 | 351.92 | 119.36 | 54.83 | 43.73 | 35.44 |
| 2854 | 351.42 | 119.41 | 54.82 | 43.72 | 35.44 |
| 2856 | 350.9  | 119.44 | 54.79 | 43.7  | 35.43 |
| 2858 | 350.31 | 119.49 | 54.77 | 43.69 | 35.41 |
| 2860 | 349.8  | 119.54 | 54.74 | 43.67 | 35.41 |
| 2862 | 349.32 | 119.61 | 54.74 | 43.69 | 35.42 |
| 2864 | 348.73 | 119.66 | 54.72 | 43.69 | 35.42 |
| 2866 | 348.23 | 119.71 | 54.7  | 43.68 | 35.41 |
| 2868 | 347.73 | 119.75 | 54.68 | 43.67 | 35.41 |
| 2870 | 347.21 | 119.77 | 54.64 | 43.65 | 35.39 |
| 2872 | 346.72 | 119.83 | 54.63 | 43.64 | 35.4  |
| 2874 | 346.12 | 119.89 | 54.62 | 43.64 | 35.39 |
| 2876 | 345.62 | 119.92 | 54.59 | 43.63 | 35.39 |
| 2878 | 345.13 | 119.96 | 54.57 | 43.61 | 35.38 |
| 2880 | 344.57 | 120.01 | 54.58 | 43.62 | 35.4  |
| 2882 | 344.1  | 120.1  | 54.58 | 43.64 | 35.43 |
| 2884 | 343.56 | 120.08 | 54.51 | 43.59 | 35.38 |
| 2886 | 343.07 | 120.15 | 54.51 | 43.59 | 35.39 |
| 2888 | 342.5  | 120.17 | 54.47 | 43.56 | 35.37 |
| 2890 | 342.08 | 120.2  | 54.45 | 43.55 | 35.36 |
| 2892 | 341.53 | 120.26 | 54.46 | 43.57 | 35.38 |
| 2894 | 341.03 | 120.29 | 54.42 | 43.54 | 35.34 |
| 2896 | 340.54 | 120.31 | 54.4  | 43.53 | 35.33 |
| 2898 | 340    | 120.38 | 54.39 | 43.54 | 35.34 |
| 2900 | 339.48 | 120.39 | 54.36 | 43.52 | 35.33 |
| 2902 | 339.02 | 120.46 | 54.38 | 43.54 | 35.37 |
| 2904 | 338.44 | 120.47 | 54.35 | 43.53 | 35.35 |
| 2906 | 337.98 | 120.52 | 54.34 | 43.53 | 35.35 |
| 2908 | 337.47 | 120.53 | 54.3  | 43.49 | 35.33 |
| 2910 | 337.01 | 120.57 | 54.29 | 43.49 | 35.34 |
| 2912 | 336.52 | 120.6  | 54.27 | 43.48 | 35.33 |
| 2914 | 335.95 | 120.62 | 54.24 | 43.46 | 35.32 |
| 2916 | 335.49 | 120.66 | 54.24 | 43.46 | 35.31 |
| 2918 | 335.01 | 120.69 | 54.22 | 43.45 | 35.33 |

|      |        |        |       |       |       |
|------|--------|--------|-------|-------|-------|
| 2920 | 334.43 | 120.72 | 54.2  | 43.43 | 35.3  |
| 2922 | 333.94 | 120.73 | 54.17 | 43.41 | 35.29 |
| 2924 | 333.47 | 120.76 | 54.15 | 43.41 | 35.29 |
| 2926 | 332.99 | 120.76 | 54.12 | 43.38 | 35.26 |
| 2928 | 332.53 | 120.8  | 54.11 | 43.38 | 35.26 |
| 2930 | 331.98 | 120.82 | 54.09 | 43.38 | 35.26 |
| 2932 | 331.51 | 120.85 | 54.07 | 43.37 | 35.25 |
| 2934 | 331.03 | 120.87 | 54.04 | 43.36 | 35.24 |
| 2936 | 330.47 | 120.88 | 54.01 | 43.33 | 35.22 |
| 2938 | 329.97 | 120.86 | 53.96 | 43.29 | 35.19 |
| 2940 | 329.52 | 120.91 | 53.96 | 43.3  | 35.2  |
| 2942 | 329.06 | 120.94 | 53.96 | 43.3  | 35.21 |
| 2944 | 328.58 | 120.95 | 53.93 | 43.29 | 35.2  |
| 2946 | 328.02 | 120.95 | 53.89 | 43.24 | 35.16 |
| 2948 | 327.58 | 121    | 53.89 | 43.26 | 35.18 |
| 2950 | 327.11 | 121    | 53.87 | 43.24 | 35.17 |
| 2952 | 326.62 | 121    | 53.82 | 43.19 | 35.13 |
| 2954 | 326.08 | 121.02 | 53.81 | 43.19 | 35.15 |
| 2956 | 325.61 | 121.02 | 53.78 | 43.18 | 35.13 |
| 2958 | 325.16 | 121.05 | 53.77 | 43.17 | 35.12 |
| 2960 | 324.63 | 121.08 | 53.76 | 43.18 | 35.12 |
| 2962 | 324.17 | 121.08 | 53.75 | 43.17 | 35.11 |
| 2964 | 323.68 | 121.07 | 53.7  | 43.14 | 35.08 |
| 2966 | 323.22 | 121.09 | 53.68 | 43.13 | 35.06 |
| 2968 | 322.69 | 121.11 | 53.67 | 43.11 | 35.06 |
| 2970 | 322.23 | 121.09 | 53.62 | 43.08 | 35.02 |
| 2972 | 321.8  | 121.13 | 53.63 | 43.11 | 35.06 |
| 2974 | 321.34 | 121.14 | 53.6  | 43.08 | 35.04 |
| 2976 | 320.86 | 121.13 | 53.56 | 43.05 | 35.01 |
| 2978 | 320.35 | 121.16 | 53.57 | 43.06 | 35.03 |
| 2980 | 319.9  | 121.17 | 53.55 | 43.05 | 35.03 |
| 2982 | 319.43 | 121.15 | 53.51 | 43.02 | 35.01 |
| 2984 | 318.89 | 121.14 | 53.47 | 42.98 | 34.98 |
| 2986 | 318.42 | 121.12 | 53.42 | 42.94 | 34.94 |
| 2988 | 317.97 | 121.12 | 53.4  | 42.93 | 34.92 |
| 2990 | 317.53 | 121.14 | 53.38 | 42.92 | 34.92 |
| 2992 | 317.06 | 121.13 | 53.36 | 42.9  | 34.9  |
| 2994 | 316.54 | 121.13 | 53.33 | 42.88 | 34.88 |
| 2996 | 316.1  | 121.13 | 53.31 | 42.86 | 34.87 |
| 2998 | 315.68 | 121.16 | 53.32 | 42.88 | 34.87 |
| 3000 | 315.25 | 121.17 | 53.29 | 42.87 | 34.86 |
| 3002 | 314.72 | 121.15 | 53.26 | 42.85 | 34.85 |
| 3004 | 314.3  | 121.18 | 53.26 | 42.86 | 34.85 |
| 3006 | 313.82 | 121.15 | 53.22 | 42.83 | 34.83 |

|      |        |        |       |       |       |
|------|--------|--------|-------|-------|-------|
| 3008 | 313.35 | 121.19 | 53.24 | 42.85 | 34.86 |
| 3010 | 312.9  | 121.17 | 53.2  | 42.82 | 34.85 |
| 3012 | 312.44 | 121.15 | 53.15 | 42.77 | 34.81 |
| 3014 | 311.99 | 121.15 | 53.14 | 42.77 | 34.8  |
| 3016 | 311.58 | 121.17 | 53.14 | 42.77 | 34.81 |
| 3018 | 311.1  | 121.19 | 53.13 | 42.77 | 34.83 |
| 3020 | 310.67 | 121.2  | 53.13 | 42.78 | 34.83 |
| 3022 | 310.2  | 121.15 | 53.08 | 42.73 | 34.79 |
| 3024 | 309.71 | 121.18 | 53.08 | 42.74 | 34.78 |
| 3026 | 309.27 | 121.16 | 53.06 | 42.73 | 34.78 |
| 3028 | 308.86 | 121.17 | 53.03 | 42.71 | 34.77 |
| 3030 | 308.44 | 121.17 | 53.03 | 42.71 | 34.78 |
| 3032 | 308.02 | 121.16 | 53    | 42.69 | 34.77 |
| 3034 | 307.5  | 121.15 | 52.98 | 42.67 | 34.76 |
| 3036 | 307.04 | 121.12 | 52.94 | 42.64 | 34.74 |
| 3038 | 306.64 | 121.13 | 52.93 | 42.63 | 34.74 |
| 3040 | 306.2  | 121.11 | 52.89 | 42.61 | 34.7  |
| 3042 | 305.69 | 121.09 | 52.87 | 42.58 | 34.68 |
| 3044 | 305.27 | 121.09 | 52.85 | 42.57 | 34.67 |
| 3046 | 304.84 | 121.08 | 52.82 | 42.56 | 34.67 |
| 3048 | 304.44 | 121.08 | 52.82 | 42.57 | 34.67 |
| 3050 | 303.96 | 121.08 | 52.82 | 42.57 | 34.67 |
| 3052 | 303.55 | 121.08 | 52.8  | 42.56 | 34.67 |
| 3054 | 303.09 | 121.04 | 52.75 | 42.51 | 34.61 |
| 3056 | 302.63 | 121.04 | 52.74 | 42.5  | 34.62 |
| 3058 | 302.17 | 120.99 | 52.69 | 42.46 | 34.58 |
| 3060 | 301.77 | 120.99 | 52.68 | 42.46 | 34.59 |
| 3062 | 301.34 | 120.98 | 52.65 | 42.44 | 34.58 |
| 3064 | 300.85 | 120.97 | 52.64 | 42.42 | 34.57 |
| 3066 | 300.4  | 120.93 | 52.59 | 42.38 | 34.53 |
| 3068 | 300    | 120.93 | 52.61 | 42.4  | 34.54 |
| 3070 | 299.62 | 120.96 | 52.61 | 42.4  | 34.57 |
| 3072 | 299.22 | 120.95 | 52.59 | 42.4  | 34.56 |
| 3074 | 298.75 | 120.94 | 52.57 | 42.38 | 34.55 |
| 3076 | 298.33 | 120.92 | 52.56 | 42.37 | 34.54 |
| 3078 | 297.94 | 120.92 | 52.55 | 42.37 | 34.55 |
| 3080 | 297.46 | 120.9  | 52.53 | 42.35 | 34.53 |
| 3082 | 297.06 | 120.88 | 52.51 | 42.35 | 34.52 |
| 3084 | 296.63 | 120.85 | 52.47 | 42.32 | 34.5  |
| 3086 | 296.23 | 120.83 | 52.45 | 42.31 | 34.49 |
| 3088 | 295.82 | 120.82 | 52.43 | 42.29 | 34.47 |
| 3090 | 295.36 | 120.82 | 52.43 | 42.3  | 34.48 |
| 3092 | 294.96 | 120.8  | 52.41 | 42.28 | 34.47 |
| 3094 | 294.53 | 120.75 | 52.36 | 42.23 | 34.42 |

|      |        |        |       |       |       |
|------|--------|--------|-------|-------|-------|
| 3096 | 294.06 | 120.74 | 52.34 | 42.23 | 34.42 |
| 3098 | 293.66 | 120.72 | 52.33 | 42.22 | 34.42 |
| 3100 | 293.27 | 120.71 | 52.33 | 42.22 | 34.44 |
| 3102 | 292.85 | 120.68 | 52.28 | 42.19 | 34.41 |
| 3104 | 292.44 | 120.7  | 52.3  | 42.2  | 34.43 |
| 3106 | 292.02 | 120.67 | 52.27 | 42.18 | 34.41 |
| 3108 | 291.61 | 120.63 | 52.24 | 42.15 | 34.39 |
| 3110 | 291.2  | 120.62 | 52.21 | 42.13 | 34.37 |
| 3112 | 290.8  | 120.59 | 52.2  | 42.13 | 34.37 |
| 3114 | 290.33 | 120.56 | 52.18 | 42.11 | 34.38 |
| 3116 | 289.92 | 120.53 | 52.14 | 42.08 | 34.33 |
| 3118 | 289.52 | 120.5  | 52.12 | 42.05 | 34.3  |
| 3120 | 289.08 | 120.48 | 52.1  | 42.06 | 34.3  |
| 3122 | 288.69 | 120.45 | 52.08 | 42.04 | 34.29 |
| 3124 | 288.3  | 120.44 | 52.07 | 42.04 | 34.31 |
| 3126 | 287.91 | 120.41 | 52.05 | 42.02 | 34.29 |
| 3128 | 287.44 | 120.4  | 52.04 | 42.01 | 34.29 |
| 3130 | 287.06 | 120.38 | 52.02 | 42    | 34.27 |
| 3132 | 286.66 | 120.34 | 51.99 | 41.97 | 34.24 |
| 3134 | 286.25 | 120.3  | 51.96 | 41.95 | 34.23 |
| 3136 | 285.88 | 120.29 | 51.95 | 41.95 | 34.24 |
| 3138 | 285.48 | 120.26 | 51.92 | 41.92 | 34.22 |
| 3140 | 285.06 | 120.25 | 51.92 | 41.93 | 34.22 |
| 3142 | 284.69 | 120.24 | 51.93 | 41.94 | 34.23 |
| 3144 | 284.22 | 120.19 | 51.89 | 41.9  | 34.2  |
| 3146 | 283.84 | 120.16 | 51.86 | 41.88 | 34.19 |
| 3148 | 283.46 | 120.13 | 51.86 | 41.88 | 34.2  |
| 3150 | 283.07 | 120.11 | 51.83 | 41.84 | 34.16 |
| 3152 | 282.67 | 120.07 | 51.81 | 41.83 | 34.16 |
| 3154 | 282.21 | 120.01 | 51.76 | 41.78 | 34.12 |
| 3156 | 281.81 | 119.97 | 51.71 | 41.75 | 34.09 |
| 3158 | 281.44 | 119.95 | 51.71 | 41.75 | 34.09 |
| 3160 | 281.07 | 119.92 | 51.69 | 41.73 | 34.09 |
| 3162 | 280.63 | 119.89 | 51.67 | 41.72 | 34.08 |
| 3164 | 280.25 | 119.86 | 51.66 | 41.7  | 34.06 |
| 3166 | 279.87 | 119.84 | 51.64 | 41.69 | 34.05 |
| 3168 | 279.51 | 119.82 | 51.64 | 41.71 | 34.07 |
| 3170 | 279.1  | 119.82 | 51.64 | 41.73 | 34.09 |
| 3172 | 278.72 | 119.78 | 51.62 | 41.69 | 34.05 |
| 3174 | 278.35 | 119.76 | 51.59 | 41.67 | 34.04 |
| 3176 | 277.97 | 119.73 | 51.58 | 41.65 | 34.03 |
| 3178 | 277.53 | 119.69 | 51.58 | 41.67 | 34.04 |
| 3180 | 277.13 | 119.63 | 51.53 | 41.62 | 34    |
| 3182 | 276.75 | 119.58 | 51.48 | 41.58 | 33.98 |

|      |        |        |       |       |       |
|------|--------|--------|-------|-------|-------|
| 3184 | 276.32 | 119.55 | 51.46 | 41.55 | 33.96 |
| 3186 | 275.96 | 119.52 | 51.45 | 41.54 | 33.94 |
| 3188 | 275.61 | 119.5  | 51.45 | 41.55 | 33.97 |
| 3190 | 275.22 | 119.45 | 51.43 | 41.53 | 33.93 |
| 3192 | 274.8  | 119.43 | 51.41 | 41.51 | 33.91 |
| 3194 | 274.42 | 119.38 | 51.37 | 41.49 | 33.9  |
| 3196 | 274.04 | 119.33 | 51.33 | 41.45 | 33.88 |
| 3198 | 273.67 | 119.29 | 51.31 | 41.44 | 33.86 |
| 3200 | 273.29 | 119.3  | 51.34 | 41.47 | 33.9  |
| 3202 | 272.91 | 119.25 | 51.3  | 41.43 | 33.87 |
| 3204 | 272.55 | 119.21 | 51.28 | 41.42 | 33.86 |
| 3206 | 272.15 | 119.15 | 51.24 | 41.38 | 33.82 |
| 3208 | 271.73 | 119.12 | 51.22 | 41.36 | 33.81 |
| 3210 | 271.39 | 119.08 | 51.22 | 41.36 | 33.81 |
| 3212 | 271.04 | 119.06 | 51.21 | 41.35 | 33.81 |
| 3214 | 270.67 | 119.02 | 51.18 | 41.32 | 33.78 |
| 3216 | 270.29 | 118.96 | 51.14 | 41.3  | 33.76 |
| 3218 | 269.88 | 118.94 | 51.13 | 41.3  | 33.76 |
| 3220 | 269.55 | 118.93 | 51.14 | 41.31 | 33.78 |
| 3222 | 269.19 | 118.9  | 51.13 | 41.31 | 33.78 |
| 3224 | 268.76 | 118.86 | 51.11 | 41.3  | 33.76 |
| 3226 | 268.38 | 118.78 | 51.06 | 41.23 | 33.71 |
| 3228 | 268.05 | 118.76 | 51.06 | 41.24 | 33.73 |
| 3230 | 267.7  | 118.73 | 51.04 | 41.23 | 33.72 |
| 3232 | 267.32 | 118.68 | 51.01 | 41.2  | 33.7  |
| 3234 | 266.91 | 118.64 | 51    | 41.2  | 33.69 |
| 3236 | 266.57 | 118.6  | 50.99 | 41.19 | 33.69 |
| 3238 | 266.26 | 118.59 | 51    | 41.2  | 33.7  |
| 3240 | 265.86 | 118.52 | 50.93 | 41.14 | 33.64 |
| 3242 | 265.45 | 118.47 | 50.91 | 41.13 | 33.62 |
| 3244 | 265.14 | 118.47 | 50.94 | 41.16 | 33.66 |
| 3246 | 264.79 | 118.44 | 50.92 | 41.15 | 33.65 |
| 3248 | 264.39 | 118.39 | 50.9  | 41.14 | 33.64 |
| 3250 | 264.04 | 118.35 | 50.88 | 41.13 | 33.63 |
| 3252 | 263.69 | 118.31 | 50.86 | 41.1  | 33.62 |
| 3254 | 263.33 | 118.27 | 50.84 | 41.08 | 33.6  |
| 3256 | 262.99 | 118.22 | 50.82 | 41.07 | 33.59 |
| 3258 | 262.58 | 118.18 | 50.8  | 41.05 | 33.59 |
| 3260 | 262.24 | 118.13 | 50.78 | 41.03 | 33.57 |
| 3262 | 261.88 | 118.09 | 50.76 | 41.02 | 33.56 |
| 3264 | 261.49 | 118.05 | 50.74 | 41    | 33.55 |
| 3266 | 261.11 | 117.96 | 50.7  | 40.96 | 33.52 |
| 3268 | 260.79 | 117.95 | 50.69 | 40.95 | 33.51 |
| 3270 | 260.46 | 117.91 | 50.68 | 40.95 | 33.52 |

|      |        |        |       |       |       |
|------|--------|--------|-------|-------|-------|
| 3272 | 260.14 | 117.9  | 50.69 | 40.96 | 33.52 |
| 3274 | 259.74 | 117.83 | 50.65 | 40.94 | 33.5  |
| 3276 | 259.4  | 117.79 | 50.63 | 40.93 | 33.48 |
| 3278 | 259.06 | 117.74 | 50.61 | 40.91 | 33.47 |
| 3280 | 258.7  | 117.7  | 50.59 | 40.89 | 33.46 |
| 3282 | 258.3  | 117.64 | 50.58 | 40.88 | 33.45 |
| 3284 | 257.93 | 117.58 | 50.54 | 40.85 | 33.42 |
| 3286 | 257.61 | 117.55 | 50.53 | 40.84 | 33.42 |
| 3288 | 257.22 | 117.52 | 50.51 | 40.83 | 33.41 |
| 3290 | 256.88 | 117.46 | 50.49 | 40.8  | 33.39 |
| 3292 | 256.55 | 117.41 | 50.46 | 40.79 | 33.38 |
| 3294 | 256.23 | 117.38 | 50.47 | 40.79 | 33.39 |
| 3296 | 255.83 | 117.33 | 50.45 | 40.78 | 33.38 |
| 3298 | 255.52 | 117.29 | 50.45 | 40.78 | 33.39 |
| 3300 | 255.18 | 117.24 | 50.43 | 40.76 | 33.37 |
| 3302 | 254.85 | 117.2  | 50.4  | 40.73 | 33.35 |
| 3304 | 254.54 | 117.17 | 50.39 | 40.74 | 33.35 |
| 3306 | 254.15 | 117.11 | 50.35 | 40.72 | 33.34 |
| 3308 | 253.81 | 117.07 | 50.34 | 40.7  | 33.33 |
| 3310 | 253.5  | 117.05 | 50.35 | 40.72 | 33.34 |
| 3312 | 253.11 | 116.97 | 50.3  | 40.67 | 33.29 |
| 3314 | 252.76 | 116.94 | 50.32 | 40.68 | 33.3  |
| 3316 | 252.41 | 116.86 | 50.25 | 40.62 | 33.25 |
| 3318 | 252.09 | 116.81 | 50.23 | 40.61 | 33.25 |
| 3320 | 251.7  | 116.75 | 50.21 | 40.6  | 33.24 |
| 3322 | 251.37 | 116.71 | 50.2  | 40.57 | 33.22 |
| 3324 | 251.05 | 116.66 | 50.18 | 40.55 | 33.21 |
| 3326 | 250.75 | 116.64 | 50.19 | 40.57 | 33.24 |
| 3328 | 250.43 | 116.59 | 50.17 | 40.55 | 33.22 |
| 3330 | 250.02 | 116.5  | 50.11 | 40.5  | 33.17 |
| 3332 | 249.68 | 116.44 | 50.08 | 40.47 | 33.14 |
| 3334 | 249.35 | 116.39 | 50.06 | 40.46 | 33.14 |
| 3336 | 248.96 | 116.34 | 50.04 | 40.45 | 33.12 |
| 3338 | 248.65 | 116.3  | 50.02 | 40.44 | 33.11 |
| 3340 | 248.38 | 116.29 | 50.04 | 40.47 | 33.13 |
| 3342 | 248.02 | 116.2  | 50    | 40.42 | 33.09 |
| 3344 | 247.66 | 116.16 | 49.99 | 40.41 | 33.09 |
| 3346 | 247.33 | 116.09 | 49.97 | 40.39 | 33.08 |
| 3348 | 247.06 | 116.08 | 49.98 | 40.41 | 33.09 |
| 3350 | 246.74 | 116.04 | 49.95 | 40.39 | 33.08 |
| 3352 | 246.36 | 115.94 | 49.89 | 40.33 | 33.03 |
| 3354 | 246.01 | 115.9  | 49.89 | 40.33 | 33.04 |
| 3356 | 245.68 | 115.85 | 49.87 | 40.3  | 33.01 |
| 3358 | 245.35 | 115.79 | 49.85 | 40.29 | 33    |

|      |        |        |       |       |       |
|------|--------|--------|-------|-------|-------|
| 3360 | 245.01 | 115.74 | 49.84 | 40.3  | 33    |
| 3362 | 244.72 | 115.72 | 49.85 | 40.31 | 33.02 |
| 3364 | 244.4  | 115.66 | 49.83 | 40.28 | 33.01 |
| 3366 | 244.1  | 115.63 | 49.82 | 40.29 | 33.02 |
| 3368 | 243.78 | 115.57 | 49.8  | 40.26 | 32.99 |
| 3370 | 243.41 | 115.51 | 49.77 | 40.25 | 32.97 |
| 3372 | 243.09 | 115.46 | 49.76 | 40.23 | 32.95 |
| 3374 | 242.77 | 115.41 | 49.73 | 40.22 | 32.93 |
| 3376 | 242.46 | 115.35 | 49.72 | 40.21 | 32.93 |
| 3378 | 242.1  | 115.29 | 49.7  | 40.19 | 32.92 |
| 3380 | 241.76 | 115.23 | 49.66 | 40.16 | 32.88 |
| 3382 | 241.44 | 115.16 | 49.64 | 40.13 | 32.87 |
| 3384 | 241.09 | 115.1  | 49.61 | 40.11 | 32.85 |
| 3386 | 240.78 | 115.07 | 49.62 | 40.11 | 32.86 |
| 3388 | 240.49 | 115.02 | 49.6  | 40.11 | 32.85 |
| 3390 | 240.18 | 114.97 | 49.59 | 40.09 | 32.84 |
| 3392 | 239.89 | 114.94 | 49.59 | 40.1  | 32.84 |
| 3394 | 239.54 | 114.88 | 49.57 | 40.09 | 32.84 |
| 3396 | 239.21 | 114.81 | 49.54 | 40.07 | 32.82 |
| 3398 | 238.9  | 114.74 | 49.5  | 40.03 | 32.79 |
| 3400 | 238.54 | 114.69 | 49.49 | 40.02 | 32.78 |
| 3402 | 238.24 | 114.63 | 49.47 | 39.99 | 32.77 |
| 3404 | 237.94 | 114.58 | 49.44 | 39.97 | 32.75 |
| 3406 | 237.6  | 114.48 | 49.39 | 39.93 | 32.71 |
| 3408 | 237.26 | 114.45 | 49.4  | 39.94 | 32.72 |
| 3410 | 236.92 | 114.36 | 49.36 | 39.91 | 32.69 |
| 3412 | 236.63 | 114.31 | 49.33 | 39.88 | 32.67 |
| 3414 | 236.36 | 114.29 | 49.35 | 39.89 | 32.7  |
| 3416 | 236.03 | 114.21 | 49.31 | 39.85 | 32.65 |
| 3418 | 235.71 | 114.17 | 49.31 | 39.85 | 32.65 |
| 3420 | 235.39 | 114.1  | 49.26 | 39.81 | 32.63 |
| 3422 | 235.1  | 114.04 | 49.25 | 39.81 | 32.61 |
| 3424 | 234.78 | 114.02 | 49.26 | 39.83 | 32.65 |
| 3426 | 234.47 | 113.95 | 49.23 | 39.8  | 32.62 |
| 3428 | 234.17 | 113.88 | 49.21 | 39.78 | 32.61 |
| 3430 | 233.88 | 113.83 | 49.2  | 39.77 | 32.6  |
| 3432 | 233.6  | 113.79 | 49.19 | 39.76 | 32.59 |
| 3434 | 233.25 | 113.73 | 49.18 | 39.75 | 32.58 |
| 3436 | 232.98 | 113.7  | 49.18 | 39.76 | 32.6  |
| 3438 | 232.7  | 113.65 | 49.17 | 39.75 | 32.6  |
| 3440 | 232.32 | 113.57 | 49.12 | 39.7  | 32.56 |
| 3442 | 232.02 | 113.48 | 49.1  | 39.67 | 32.54 |
| 3444 | 231.73 | 113.43 | 49.08 | 39.66 | 32.53 |
| 3446 | 231.42 | 113.36 | 49.04 | 39.62 | 32.49 |

|      |        |        |       |       |       |
|------|--------|--------|-------|-------|-------|
| 3448 | 231.14 | 113.32 | 49.04 | 39.62 | 32.5  |
| 3450 | 230.8  | 113.26 | 49.02 | 39.61 | 32.49 |
| 3452 | 230.51 | 113.2  | 49.01 | 39.6  | 32.48 |
| 3454 | 230.22 | 113.15 | 48.99 | 39.6  | 32.47 |
| 3456 | 229.93 | 113.1  | 48.97 | 39.58 | 32.46 |
| 3458 | 229.6  | 113.03 | 48.96 | 39.57 | 32.45 |
| 3460 | 229.32 | 112.98 | 48.94 | 39.55 | 32.43 |
| 3462 | 229.04 | 112.92 | 48.92 | 39.54 | 32.42 |
| 3464 | 228.7  | 112.87 | 48.9  | 39.53 | 32.42 |
| 3466 | 228.41 | 112.81 | 48.89 | 39.51 | 32.4  |
| 3468 | 228.13 | 112.75 | 48.87 | 39.49 | 32.39 |
| 3470 | 227.81 | 112.68 | 48.84 | 39.45 | 32.37 |
| 3472 | 227.52 | 112.61 | 48.81 | 39.42 | 32.34 |
| 3474 | 227.2  | 112.56 | 48.8  | 39.41 | 32.34 |
| 3476 | 226.92 | 112.51 | 48.79 | 39.41 | 32.35 |
| 3478 | 226.65 | 112.47 | 48.78 | 39.41 | 32.34 |
| 3480 | 226.35 | 112.4  | 48.75 | 39.38 | 32.31 |
| 3482 | 226.04 | 112.33 | 48.75 | 39.37 | 32.31 |
| 3484 | 225.75 | 112.28 | 48.72 | 39.36 | 32.29 |
| 3486 | 225.45 | 112.2  | 48.68 | 39.32 | 32.26 |
| 3488 | 225.15 | 112.17 | 48.68 | 39.33 | 32.27 |
| 3490 | 224.87 | 112.1  | 48.66 | 39.32 | 32.26 |
| 3492 | 224.53 | 111.99 | 48.6  | 39.25 | 32.19 |
| 3494 | 224.26 | 111.96 | 48.62 | 39.26 | 32.22 |
| 3496 | 223.98 | 111.89 | 48.58 | 39.24 | 32.21 |
| 3498 | 223.67 | 111.86 | 48.58 | 39.23 | 32.19 |
| 3500 | 223.41 | 111.81 | 48.58 | 39.25 | 32.2  |
| 3502 | 223.12 | 111.76 | 48.57 | 39.23 | 32.19 |
| 3504 | 222.84 | 111.7  | 48.56 | 39.22 | 32.18 |
| 3506 | 222.54 | 111.63 | 48.54 | 39.2  | 32.17 |
| 3508 | 222.26 | 111.58 | 48.52 | 39.19 | 32.15 |
| 3510 | 221.99 | 111.51 | 48.51 | 39.17 | 32.14 |
| 3512 | 221.7  | 111.44 | 48.48 | 39.14 | 32.11 |
| 3514 | 221.34 | 111.35 | 48.43 | 39.11 | 32.08 |
| 3516 | 221.09 | 111.31 | 48.44 | 39.1  | 32.1  |
| 3518 | 220.82 | 111.26 | 48.43 | 39.1  | 32.09 |
| 3520 | 220.55 | 111.2  | 48.4  | 39.07 | 32.07 |
| 3522 | 220.21 | 111.11 | 48.36 | 39.04 | 32.04 |
| 3524 | 219.96 | 111.08 | 48.37 | 39.05 | 32.06 |
| 3526 | 219.68 | 111.02 | 48.36 | 39.03 | 32.05 |
| 3528 | 219.3  | 110.91 | 48.29 | 38.98 | 31.99 |
| 3530 | 219.05 | 110.86 | 48.29 | 38.98 | 31.99 |
| 3532 | 218.82 | 110.83 | 48.31 | 39    | 32.01 |
| 3534 | 218.55 | 110.78 | 48.29 | 38.99 | 32    |



|      |        |        |       |       |       |
|------|--------|--------|-------|-------|-------|
| 3536 | 218.21 | 110.71 | 48.27 | 38.97 | 31.98 |
| 3538 | 217.94 | 110.64 | 48.24 | 38.94 | 31.95 |
| 3540 | 217.68 | 110.56 | 48.21 | 38.93 | 31.95 |
| 3542 | 217.41 | 110.5  | 48.2  | 38.91 | 31.93 |
| 3544 | 217.17 | 110.47 | 48.21 | 38.91 | 31.95 |
| 3546 | 216.9  | 110.41 | 48.19 | 38.89 | 31.93 |
| 3548 | 216.57 | 110.32 | 48.16 | 38.86 | 31.9  |
| 3550 | 216.31 | 110.27 | 48.14 | 38.86 | 31.91 |
| 3552 | 216.05 | 110.21 | 48.13 | 38.85 | 31.9  |
| 3554 | 215.74 | 110.14 | 48.11 | 38.83 | 31.89 |
| 3556 | 215.44 | 110.05 | 48.07 | 38.79 | 31.85 |
| 3558 | 215.2  | 110.02 | 48.08 | 38.79 | 31.86 |
| 3560 | 214.9  | 109.96 | 48.07 | 38.78 | 31.85 |
| 3562 | 214.62 | 109.87 | 48.03 | 38.76 | 31.82 |
| 3564 | 214.35 | 109.82 | 48.01 | 38.74 | 31.82 |
| 3566 | 214.1  | 109.78 | 48.02 | 38.74 | 31.82 |
| 3568 | 213.85 | 109.73 | 48.01 | 38.74 | 31.82 |
| 3570 | 213.53 | 109.65 | 47.98 | 38.72 | 31.79 |
| 3572 | 213.27 | 109.59 | 47.96 | 38.7  | 31.79 |
| 3574 | 213.01 | 109.52 | 47.95 | 38.69 | 31.78 |
| 3576 | 212.74 | 109.47 | 47.94 | 38.68 | 31.77 |
| 3578 | 212.42 | 109.4  | 47.91 | 38.65 | 31.74 |
| 3580 | 212.18 | 109.34 | 47.9  | 38.64 | 31.75 |
| 3582 | 211.91 | 109.27 | 47.88 | 38.62 | 31.74 |
| 3584 | 211.63 | 109.2  | 47.86 | 38.59 | 31.71 |
| 3586 | 211.34 | 109.13 | 47.85 | 38.58 | 31.71 |
| 3588 | 211.08 | 109.08 | 47.83 | 38.56 | 31.7  |
| 3590 | 210.86 | 109.05 | 47.84 | 38.59 | 31.74 |
| 3592 | 210.64 | 109.03 | 47.87 | 38.6  | 31.75 |
| 3594 | 210.31 | 108.95 | 47.83 | 38.57 | 31.73 |
| 3596 | 210.07 | 108.88 | 47.83 | 38.57 | 31.72 |
| 3598 | 209.83 | 108.85 | 47.82 | 38.57 | 31.72 |
| 3600 | 209.56 | 108.77 | 47.8  | 38.55 | 31.7  |
| 3602 | 209.25 | 108.7  | 47.79 | 38.53 | 31.69 |
| 3604 | 209.02 | 108.66 | 47.79 | 38.55 | 31.7  |
| 3606 | 208.72 | 108.55 | 47.72 | 38.47 | 31.61 |
| 3608 | 208.43 | 108.49 | 47.71 | 38.48 | 31.62 |
| 3610 | 208.17 | 108.4  | 47.67 | 38.44 | 31.59 |
| 3612 | 207.97 | 108.39 | 47.7  | 38.46 | 31.62 |
| 3614 | 207.72 | 108.33 | 47.69 | 38.47 | 31.62 |
| 3616 | 207.47 | 108.27 | 47.67 | 38.43 | 31.59 |
| 3618 | 207.14 | 108.17 | 47.64 | 38.41 | 31.57 |
| 3620 | 206.88 | 108.09 | 47.6  | 38.37 | 31.53 |
| 3622 | 206.65 | 108.06 | 47.62 | 38.39 | 31.55 |

|      |        |        |       |       |       |
|------|--------|--------|-------|-------|-------|
| 3624 | 206.42 | 108.02 | 47.62 | 38.39 | 31.56 |
| 3626 | 206.15 | 107.98 | 47.64 | 38.42 | 31.58 |
| 3628 | 205.9  | 107.92 | 47.61 | 38.4  | 31.57 |
| 3630 | 205.67 | 107.87 | 47.61 | 38.4  | 31.57 |
| 3632 | 205.38 | 107.81 | 47.59 | 38.38 | 31.56 |
| 3634 | 205.12 | 107.74 | 47.57 | 38.36 | 31.53 |
| 3636 | 204.89 | 107.69 | 47.56 | 38.35 | 31.54 |
| 3638 | 204.64 | 107.63 | 47.56 | 38.33 | 31.51 |
| 3640 | 204.41 | 107.59 | 47.56 | 38.35 | 31.53 |
| 3642 | 204.12 | 107.52 | 47.54 | 38.32 | 31.51 |
| 3644 | 203.85 | 107.43 | 47.51 | 38.29 | 31.48 |
| 3646 | 203.6  | 107.38 | 47.51 | 38.3  | 31.49 |
| 3648 | 203.38 | 107.34 | 47.51 | 38.3  | 31.49 |
| 3650 | 203.06 | 107.24 | 47.47 | 38.25 | 31.45 |
| 3652 | 202.82 | 107.2  | 47.46 | 38.24 | 31.45 |
| 3654 | 202.58 | 107.13 | 47.44 | 38.23 | 31.43 |
| 3656 | 202.29 | 107.07 | 47.43 | 38.21 | 31.43 |
| 3658 | 202.07 | 107.02 | 47.43 | 38.22 | 31.43 |
| 3660 | 201.83 | 106.96 | 47.41 | 38.2  | 31.42 |
| 3662 | 201.56 | 106.87 | 47.37 | 38.16 | 31.38 |
| 3664 | 201.33 | 106.83 | 47.38 | 38.17 | 31.39 |
| 3666 | 201.06 | 106.77 | 47.38 | 38.17 | 31.39 |
| 3668 | 200.82 | 106.7  | 47.36 | 38.16 | 31.38 |
| 3670 | 200.58 | 106.65 | 47.34 | 38.14 | 31.36 |
| 3672 | 200.29 | 106.58 | 47.33 | 38.12 | 31.36 |
| 3674 | 200.06 | 106.51 | 47.32 | 38.11 | 31.34 |
| 3676 | 199.8  | 106.44 | 47.29 | 38.08 | 31.31 |
| 3678 | 199.54 | 106.37 | 47.26 | 38.06 | 31.3  |
| 3680 | 199.32 | 106.33 | 47.27 | 38.07 | 31.31 |
| 3682 | 199.03 | 106.26 | 47.25 | 38.06 | 31.3  |
| 3684 | 198.79 | 106.2  | 47.25 | 38.05 | 31.29 |
| 3686 | 198.56 | 106.13 | 47.22 | 38.01 | 31.27 |
| 3688 | 198.29 | 106.05 | 47.18 | 37.98 | 31.23 |
| 3690 | 198.05 | 106    | 47.2  | 38    | 31.25 |
| 3692 | 197.81 | 105.94 | 47.19 | 37.99 | 31.25 |
| 3694 | 197.57 | 105.88 | 47.18 | 37.98 | 31.24 |
| 3696 | 197.29 | 105.82 | 47.16 | 37.97 | 31.23 |
| 3698 | 197.06 | 105.76 | 47.15 | 37.96 | 31.22 |
| 3700 | 196.82 | 105.68 | 47.13 | 37.94 | 31.21 |
| 3702 | 196.59 | 105.63 | 47.12 | 37.93 | 31.2  |
| 3704 | 196.35 | 105.57 | 47.1  | 37.92 | 31.19 |
| 3706 | 196.07 | 105.48 | 47.08 | 37.88 | 31.16 |
| 3708 | 195.85 | 105.43 | 47.07 | 37.89 | 31.17 |
| 3710 | 195.62 | 105.37 | 47.06 | 37.88 | 31.16 |

|      |        |        |       |       |       |
|------|--------|--------|-------|-------|-------|
| 3712 | 195.35 | 105.31 | 47.05 | 37.86 | 31.15 |
| 3714 | 195.09 | 105.2  | 47.01 | 37.83 | 31.11 |
| 3716 | 194.88 | 105.17 | 47.01 | 37.82 | 31.12 |
| 3718 | 194.65 | 105.11 | 47    | 37.82 | 31.12 |
| 3720 | 194.42 | 105.05 | 46.96 | 37.78 | 31.08 |
| 3722 | 194.1  | 104.92 | 46.92 | 37.72 | 31.05 |
| 3724 | 193.92 | 104.91 | 46.95 | 37.77 | 31.09 |
| 3726 | 193.69 | 104.85 | 46.94 | 37.77 | 31.07 |
| 3728 | 193.44 | 104.77 | 46.93 | 37.75 | 31.06 |
| 3730 | 193.18 | 104.7  | 46.92 | 37.74 | 31.06 |
| 3732 | 192.94 | 104.63 | 46.88 | 37.71 | 31.03 |
| 3734 | 192.69 | 104.55 | 46.85 | 37.7  | 31.02 |
| 3736 | 192.46 | 104.51 | 46.87 | 37.69 | 31.02 |
| 3738 | 192.22 | 104.43 | 46.83 | 37.67 | 31.01 |
| 3740 | 192.01 | 104.39 | 46.84 | 37.66 | 31.01 |
| 3742 | 191.75 | 104.3  | 46.8  | 37.62 | 30.97 |
| 3744 | 191.55 | 104.25 | 46.8  | 37.64 | 30.98 |
| 3746 | 191.26 | 104.18 | 46.78 | 37.61 | 30.96 |
| 3748 | 191.06 | 104.12 | 46.77 | 37.61 | 30.97 |
| 3750 | 190.81 | 104.03 | 46.74 | 37.58 | 30.93 |
| 3752 | 190.57 | 103.99 | 46.74 | 37.58 | 30.93 |
| 3754 | 190.35 | 103.93 | 46.74 | 37.58 | 30.93 |
| 3756 | 190.13 | 103.87 | 46.72 | 37.57 | 30.93 |
| 3758 | 189.9  | 103.81 | 46.71 | 37.55 | 30.91 |
| 3760 | 189.64 | 103.75 | 46.69 | 37.53 | 30.91 |
| 3762 | 189.41 | 103.68 | 46.67 | 37.52 | 30.89 |
| 3764 | 189.19 | 103.61 | 46.66 | 37.52 | 30.89 |
| 3766 | 188.97 | 103.55 | 46.65 | 37.5  | 30.87 |
| 3768 | 188.75 | 103.5  | 46.64 | 37.49 | 30.86 |
| 3770 | 188.49 | 103.43 | 46.62 | 37.48 | 30.85 |
| 3772 | 188.27 | 103.36 | 46.61 | 37.47 | 30.84 |
| 3774 | 188.03 | 103.29 | 46.58 | 37.45 | 30.81 |
| 3776 | 187.74 | 103.21 | 46.55 | 37.41 | 30.79 |
| 3778 | 187.54 | 103.15 | 46.54 | 37.42 | 30.8  |
| 3780 | 187.32 | 103.08 | 46.51 | 37.39 | 30.77 |
| 3782 | 187.12 | 103.03 | 46.52 | 37.39 | 30.78 |
| 3784 | 186.9  | 102.98 | 46.52 | 37.39 | 30.78 |
| 3786 | 186.62 | 102.88 | 46.47 | 37.35 | 30.73 |
| 3788 | 186.37 | 102.79 | 46.44 | 37.32 | 30.7  |
| 3790 | 186.18 | 102.76 | 46.46 | 37.32 | 30.71 |
| 3792 | 185.92 | 102.69 | 46.44 | 37.3  | 30.72 |
| 3794 | 185.69 | 102.61 | 46.42 | 37.29 | 30.71 |
| 3796 | 185.41 | 102.49 | 46.35 | 37.22 | 30.64 |
| 3798 | 185.25 | 102.49 | 46.38 | 37.26 | 30.68 |

|      |        |        |       |       |       |
|------|--------|--------|-------|-------|-------|
| 3800 | 184.97 | 102.41 | 46.34 | 37.22 | 30.63 |
| 3802 | 184.73 | 102.32 | 46.32 | 37.2  | 30.62 |
| 3804 | 184.51 | 102.25 | 46.29 | 37.18 | 30.6  |
| 3806 | 184.3  | 102.18 | 46.28 | 37.17 | 30.59 |
| 3808 | 184.04 | 102.07 | 46.24 | 37.12 | 30.55 |
| 3810 | 183.8  | 102.03 | 46.22 | 37.12 | 30.53 |
| 3812 | 183.58 | 101.94 | 46.19 | 37.08 | 30.5  |
| 3814 | 183.34 | 101.86 | 46.16 | 37.05 | 30.48 |
| 3816 | 183.1  | 101.8  | 46.16 | 37.06 | 30.49 |
| 3818 | 182.9  | 101.74 | 46.15 | 37.06 | 30.5  |
| 3820 | 182.71 | 101.71 | 46.16 | 37.06 | 30.51 |
| 3822 | 182.52 | 101.66 | 46.17 | 37.07 | 30.51 |
| 3824 | 182.29 | 101.59 | 46.14 | 37.04 | 30.48 |
| 3826 | 182.06 | 101.52 | 46.13 | 37.03 | 30.48 |
| 3828 | 181.83 | 101.44 | 46.1  | 36.99 | 30.45 |
| 3830 | 181.6  | 101.35 | 46.06 | 36.96 | 30.42 |
| 3832 | 181.36 | 101.28 | 46.04 | 36.93 | 30.42 |
| 3834 | 181.12 | 101.2  | 46.02 | 36.93 | 30.41 |
| 3836 | 180.93 | 101.15 | 46.02 | 36.92 | 30.41 |
| 3838 | 180.71 | 101.08 | 46    | 36.91 | 30.39 |
| 3840 | 180.49 | 101.05 | 46.02 | 36.93 | 30.41 |
| 3842 | 180.31 | 100.99 | 46.02 | 36.93 | 30.44 |
| 3844 | 180.09 | 100.92 | 45.99 | 36.9  | 30.41 |
| 3846 | 179.87 | 100.86 | 45.98 | 36.9  | 30.39 |
| 3848 | 179.7  | 100.84 | 46.02 | 36.94 | 30.43 |
| 3850 | 179.45 | 100.78 | 46    | 36.91 | 30.42 |
| 3852 | 179.23 | 100.69 | 45.97 | 36.88 | 30.4  |
| 3854 | 178.97 | 100.57 | 45.89 | 36.81 | 30.32 |
| 3856 | 178.75 | 100.52 | 45.89 | 36.81 | 30.33 |
| 3858 | 178.55 | 100.46 | 45.88 | 36.8  | 30.33 |
| 3860 | 178.33 | 100.39 | 45.86 | 36.76 | 30.31 |
| 3862 | 178.09 | 100.29 | 45.81 | 36.73 | 30.26 |
| 3864 | 177.88 | 100.27 | 45.83 | 36.75 | 30.28 |
| 3866 | 177.68 | 100.19 | 45.81 | 36.75 | 30.28 |
| 3868 | 177.47 | 100.13 | 45.8  | 36.73 | 30.26 |
| 3870 | 177.25 | 100.05 | 45.77 | 36.7  | 30.24 |
| 3872 | 177.08 | 100.02 | 45.78 | 36.72 | 30.25 |
| 3874 | 176.81 | 99.92  | 45.73 | 36.67 | 30.21 |
| 3876 | 176.59 | 99.85  | 45.72 | 36.66 | 30.2  |
| 3878 | 176.41 | 99.8   | 45.73 | 36.66 | 30.21 |
| 3880 | 176.22 | 99.75  | 45.72 | 36.67 | 30.21 |
| 3882 | 175.98 | 99.67  | 45.71 | 36.65 | 30.2  |
| 3884 | 175.79 | 99.61  | 45.69 | 36.64 | 30.22 |
| 3886 | 175.59 | 99.55  | 45.68 | 36.63 | 30.21 |

|      |        |       |       |       |       |
|------|--------|-------|-------|-------|-------|
| 3888 | 175.33 | 99.47 | 45.66 | 36.6  | 30.19 |
| 3890 | 175.11 | 99.39 | 45.64 | 36.58 | 30.16 |
| 3892 | 174.9  | 99.31 | 45.6  | 36.54 | 30.13 |
| 3894 | 174.69 | 99.25 | 45.59 | 36.53 | 30.11 |
| 3896 | 174.45 | 99.17 | 45.56 | 36.49 | 30.08 |
| 3898 | 174.26 | 99.09 | 45.55 | 36.5  | 30.1  |
| 3900 | 174.04 | 99.03 | 45.52 | 36.47 | 30.07 |
| 3902 | 173.81 | 98.94 | 45.48 | 36.43 | 30.04 |
| 3904 | 173.64 | 98.91 | 45.5  | 36.44 | 30.06 |
| 3906 | 173.44 | 98.87 | 45.52 | 36.46 | 30.08 |
| 3908 | 173.24 | 98.8  | 45.5  | 36.46 | 30.07 |
| 3910 | 173.06 | 98.76 | 45.51 | 36.46 | 30.07 |
| 3912 | 172.88 | 98.72 | 45.52 | 36.48 | 30.09 |
| 3914 | 172.62 | 98.62 | 45.47 | 36.44 | 30.06 |
| 3916 | 172.43 | 98.57 | 45.47 | 36.44 | 30.05 |
| 3918 | 172.22 | 98.5  | 45.44 | 36.4  | 30.03 |
| 3920 | 171.98 | 98.43 | 45.42 | 36.39 | 30.02 |
| 3922 | 171.8  | 98.38 | 45.42 | 36.39 | 30.03 |
| 3924 | 171.61 | 98.33 | 45.42 | 36.4  | 30.04 |
| 3926 | 171.41 | 98.27 | 45.42 | 36.39 | 30.03 |
| 3928 | 171.2  | 98.19 | 45.38 | 36.36 | 30.02 |
| 3930 | 170.95 | 98.09 | 45.33 | 36.32 | 29.99 |
| 3932 | 170.72 | 98.01 | 45.31 | 36.27 | 29.94 |
| 3934 | 170.49 | 97.92 | 45.27 | 36.24 | 29.92 |
| 3936 | 170.29 | 97.85 | 45.24 | 36.22 | 29.9  |
| 3938 | 170.1  | 97.8  | 45.25 | 36.23 | 29.9  |
| 3940 | 169.93 | 97.77 | 45.25 | 36.23 | 29.91 |
| 3942 | 169.72 | 97.69 | 45.23 | 36.21 | 29.9  |
| 3944 | 169.52 | 97.64 | 45.25 | 36.22 | 29.92 |
| 3946 | 169.3  | 97.55 | 45.22 | 36.2  | 29.89 |
| 3948 | 169.12 | 97.51 | 45.22 | 36.21 | 29.89 |
| 3950 | 168.93 | 97.45 | 45.19 | 36.18 | 29.86 |
| 3952 | 168.72 | 97.37 | 45.17 | 36.16 | 29.87 |
| 3954 | 168.51 | 97.31 | 45.18 | 36.17 | 29.88 |
| 3956 | 168.34 | 97.27 | 45.18 | 36.17 | 29.88 |
| 3958 | 168.12 | 97.19 | 45.15 | 36.15 | 29.86 |
| 3960 | 167.84 | 97.08 | 45.09 | 36.08 | 29.8  |
| 3962 | 167.63 | 96.99 | 45.05 | 36.06 | 29.77 |
| 3964 | 167.46 | 96.94 | 45.04 | 36.04 | 29.75 |
| 3966 | 167.25 | 96.85 | 45.02 | 36.02 | 29.74 |
| 3968 | 167.02 | 96.78 | 45    | 35.99 | 29.73 |
| 3970 | 166.86 | 96.73 | 45    | 35.99 | 29.73 |
| 3972 | 166.65 | 96.64 | 44.97 | 35.97 | 29.71 |
| 3974 | 166.44 | 96.57 | 44.95 | 35.95 | 29.68 |

|      |        |       |       |       |       |
|------|--------|-------|-------|-------|-------|
| 3976 | 166.28 | 96.54 | 44.96 | 35.96 | 29.7  |
| 3978 | 166.01 | 96.42 | 44.89 | 35.9  | 29.64 |
| 3980 | 165.82 | 96.36 | 44.9  | 35.9  | 29.66 |
| 3982 | 165.63 | 96.29 | 44.87 | 35.88 | 29.62 |
| 3984 | 165.46 | 96.25 | 44.89 | 35.89 | 29.63 |
| 3986 | 165.21 | 96.14 | 44.84 | 35.85 | 29.61 |
| 3988 | 165.02 | 96.09 | 44.82 | 35.84 | 29.61 |
| 3990 | 164.83 | 96.02 | 44.81 | 35.83 | 29.6  |
| 3992 | 164.66 | 96    | 44.83 | 35.85 | 29.62 |
| 3994 | 164.48 | 95.94 | 44.83 | 35.85 | 29.63 |
| 3996 | 164.27 | 95.86 | 44.8  | 35.82 | 29.61 |
| 3998 | 164.1  | 95.81 | 44.79 | 35.81 | 29.6  |
| 4000 | 163.91 | 95.73 | 44.77 | 35.79 | 29.58 |
| 4002 | 163.7  | 95.66 | 44.74 | 35.75 | 29.57 |
| 4004 | 163.46 | 95.56 | 44.69 | 35.71 | 29.53 |
| 4006 | 163.31 | 95.53 | 44.72 | 35.74 | 29.56 |
| 4008 | 163.15 | 95.49 | 44.72 | 35.74 | 29.57 |
| 4010 | 162.93 | 95.41 | 44.7  | 35.72 | 29.55 |
| 4012 | 162.74 | 95.36 | 44.69 | 35.71 | 29.54 |
| 4014 | 162.58 | 95.3  | 44.69 | 35.71 | 29.56 |
| 4016 | 162.37 | 95.23 | 44.67 | 35.68 | 29.53 |
| 4018 | 162.16 | 95.17 | 44.66 | 35.69 | 29.54 |
| 4020 | 161.97 | 95.1  | 44.63 | 35.66 | 29.51 |
| 4022 | 161.77 | 95.02 | 44.62 | 35.64 | 29.49 |
| 4024 | 161.6  | 94.99 | 44.61 | 35.64 | 29.49 |
| 4026 | 161.4  | 94.89 | 44.57 | 35.61 | 29.46 |
| 4028 | 161.18 | 94.83 | 44.57 | 35.6  | 29.47 |
| 4030 | 161.02 | 94.78 | 44.56 | 35.6  | 29.47 |
| 4032 | 160.83 | 94.72 | 44.55 | 35.59 | 29.46 |
| 4034 | 160.6  | 94.65 | 44.53 | 35.58 | 29.44 |
| 4036 | 160.4  | 94.52 | 44.47 | 35.51 | 29.4  |
| 4038 | 160.22 | 94.48 | 44.48 | 35.51 | 29.42 |
| 4040 | 160    | 94.39 | 44.43 | 35.47 | 29.37 |
| 4042 | 159.83 | 94.35 | 44.46 | 35.5  | 29.41 |
| 4044 | 159.65 | 94.29 | 44.45 | 35.48 | 29.39 |
| 4046 | 159.47 | 94.24 | 44.44 | 35.48 | 29.39 |
| 4048 | 159.26 | 94.16 | 44.41 | 35.44 | 29.37 |
| 4050 | 159.09 | 94.1  | 44.41 | 35.45 | 29.37 |
| 4052 | 158.91 | 94.04 | 44.4  | 35.45 | 29.37 |
| 4054 | 158.72 | 93.97 | 44.37 | 35.42 | 29.34 |
| 4056 | 158.48 | 93.87 | 44.34 | 35.39 | 29.32 |
| 4058 | 158.27 | 93.8  | 44.29 | 35.35 | 29.28 |
| 4060 | 158.14 | 93.77 | 44.3  | 35.36 | 29.3  |
| 4062 | 157.93 | 93.68 | 44.28 | 35.33 | 29.27 |

|      |        |       |       |       |       |
|------|--------|-------|-------|-------|-------|
| 4064 | 157.77 | 93.64 | 44.29 | 35.35 | 29.29 |
| 4066 | 157.52 | 93.55 | 44.25 | 35.3  | 29.25 |
| 4068 | 157.33 | 93.46 | 44.21 | 35.27 | 29.23 |
| 4070 | 157.17 | 93.42 | 44.21 | 35.26 | 29.23 |
| 4072 | 156.97 | 93.37 | 44.21 | 35.27 | 29.25 |
| 4074 | 156.78 | 93.29 | 44.19 | 35.25 | 29.22 |
| 4076 | 156.6  | 93.23 | 44.19 | 35.24 | 29.22 |
| 4078 | 156.43 | 93.17 | 44.17 | 35.23 | 29.23 |
| 4080 | 156.25 | 93.14 | 44.19 | 35.24 | 29.23 |
| 4082 | 156.06 | 93.07 | 44.16 | 35.22 | 29.2  |
| 4084 | 155.87 | 92.97 | 44.12 | 35.2  | 29.2  |
| 4086 | 155.69 | 92.91 | 44.1  | 35.17 | 29.17 |
| 4088 | 155.49 | 92.84 | 44.09 | 35.16 | 29.15 |
| 4090 | 155.3  | 92.76 | 44.07 | 35.15 | 29.15 |
| 4092 | 155.15 | 92.72 | 44.06 | 35.14 | 29.14 |
| 4094 | 154.99 | 92.66 | 44.06 | 35.14 | 29.15 |
| 4096 | 154.79 | 92.58 | 44.03 | 35.12 | 29.14 |
| 4098 | 154.58 | 92.52 | 44.02 | 35.1  | 29.13 |
| 4100 | 154.43 | 92.46 | 44.02 | 35.08 | 29.12 |
| 4102 | 154.27 | 92.42 | 44.03 | 35.1  | 29.14 |
| 4104 | 154.07 | 92.33 | 43.98 | 35.06 | 29.1  |
| 4106 | 153.83 | 92.22 | 43.93 | 35.01 | 29.06 |
| 4108 | 153.68 | 92.18 | 43.93 | 35.01 | 29.07 |
| 4110 | 153.5  | 92.11 | 43.92 | 34.98 | 29.05 |
| 4112 | 153.3  | 92.06 | 43.9  | 34.98 | 29.04 |
| 4114 | 153.16 | 92.02 | 43.92 | 35.01 | 29.07 |
| 4116 | 153.03 | 91.99 | 43.96 | 35.05 | 29.11 |
| 4118 | 152.83 | 91.91 | 43.92 | 35.01 | 29.07 |
| 4120 | 152.62 | 91.84 | 43.89 | 34.98 | 29.05 |
| 4122 | 152.44 | 91.76 | 43.87 | 34.99 | 29.06 |
| 4124 | 152.28 | 91.72 | 43.87 | 34.97 | 29.06 |
| 4126 | 152.11 | 91.65 | 43.86 | 34.96 | 29.04 |
| 4128 | 151.89 | 91.57 | 43.81 | 34.91 | 28.99 |
| 4130 | 151.68 | 91.48 | 43.78 | 34.88 | 28.98 |
| 4132 | 151.53 | 91.43 | 43.79 | 34.89 | 29    |
| 4134 | 151.37 | 91.38 | 43.79 | 34.88 | 29    |
| 4136 | 151.13 | 91.29 | 43.74 | 34.82 | 28.95 |
| 4138 | 150.96 | 91.22 | 43.7  | 34.8  | 28.93 |
| 4140 | 150.78 | 91.13 | 43.68 | 34.78 | 28.91 |
| 4142 | 150.61 | 91.07 | 43.67 | 34.76 | 28.9  |
| 4144 | 150.41 | 91.01 | 43.65 | 34.75 | 28.9  |
| 4146 | 150.27 | 90.97 | 43.66 | 34.75 | 28.92 |
| 4148 | 150.15 | 90.95 | 43.69 | 34.8  | 28.94 |
| 4150 | 149.97 | 90.88 | 43.66 | 34.77 | 28.92 |

|      |        |       |       |       |       |
|------|--------|-------|-------|-------|-------|
| 4152 | 149.78 | 90.79 | 43.62 | 34.74 | 28.88 |
| 4154 | 149.57 | 90.7  | 43.61 | 34.72 | 28.88 |
| 4156 | 149.4  | 90.63 | 43.58 | 34.69 | 28.85 |
| 4158 | 149.22 | 90.57 | 43.56 | 34.67 | 28.83 |
| 4160 | 149.02 | 90.5  | 43.54 | 34.66 | 28.82 |
| 4162 | 148.85 | 90.43 | 43.53 | 34.64 | 28.81 |
| 4164 | 148.68 | 90.37 | 43.51 | 34.63 | 28.81 |
| 4166 | 148.52 | 90.3  | 43.49 | 34.61 | 28.8  |
| 4168 | 148.32 | 90.24 | 43.49 | 34.6  | 28.81 |
| 4170 | 148.17 | 90.18 | 43.47 | 34.58 | 28.8  |
| 4172 | 147.99 | 90.11 | 43.45 | 34.56 | 28.78 |
| 4174 | 147.82 | 90.05 | 43.43 | 34.55 | 28.76 |
| 4176 | 147.68 | 90.01 | 43.45 | 34.56 | 28.79 |
| 4178 | 147.46 | 89.91 | 43.41 | 34.53 | 28.76 |
| 4180 | 147.35 | 89.91 | 43.45 | 34.57 | 28.8  |
| 4182 | 147.14 | 89.79 | 43.37 | 34.5  | 28.72 |
| 4184 | 146.93 | 89.68 | 43.31 | 34.44 | 28.68 |
| 4186 | 146.77 | 89.66 | 43.34 | 34.46 | 28.71 |
| 4188 | 146.61 | 89.59 | 43.32 | 34.44 | 28.7  |
| 4190 | 146.45 | 89.54 | 43.32 | 34.43 | 28.69 |
| 4192 | 146.21 | 89.43 | 43.26 | 34.38 | 28.65 |
| 4194 | 146.06 | 89.37 | 43.25 | 34.38 | 28.64 |
| 4196 | 145.92 | 89.34 | 43.25 | 34.39 | 28.64 |
| 4198 | 145.76 | 89.28 | 43.24 | 34.38 | 28.65 |
| 4200 | 145.57 | 89.18 | 43.19 | 34.34 | 28.6  |
| 4202 | 145.41 | 89.16 | 43.23 | 34.36 | 28.63 |
| 4204 | 145.27 | 89.11 | 43.22 | 34.37 | 28.65 |
| 4206 | 145.06 | 89.01 | 43.18 | 34.32 | 28.61 |
| 4208 | 144.87 | 88.95 | 43.16 | 34.3  | 28.59 |
| 4210 | 144.72 | 88.89 | 43.15 | 34.29 | 28.57 |
| 4212 | 144.58 | 88.83 | 43.14 | 34.28 | 28.58 |
| 4214 | 144.41 | 88.77 | 43.12 | 34.27 | 28.57 |
| 4216 | 144.27 | 88.73 | 43.13 | 34.28 | 28.58 |
| 4218 | 144.11 | 88.67 | 43.13 | 34.28 | 28.6  |
| 4220 | 143.95 | 88.61 | 43.11 | 34.27 | 28.58 |
| 4222 | 143.79 | 88.55 | 43.1  | 34.26 | 28.58 |
| 4224 | 143.61 | 88.47 | 43.07 | 34.23 | 28.55 |
| 4226 | 143.43 | 88.41 | 43.06 | 34.22 | 28.55 |
| 4228 | 143.26 | 88.35 | 43.05 | 34.2  | 28.54 |
| 4230 | 143.09 | 88.27 | 43.03 | 34.19 | 28.51 |
| 4232 | 142.92 | 88.21 | 43.02 | 34.18 | 28.52 |
| 4234 | 142.75 | 88.15 | 43    | 34.18 | 28.51 |
| 4236 | 142.58 | 88.07 | 42.97 | 34.13 | 28.47 |
| 4238 | 142.47 | 88.04 | 42.99 | 34.16 | 28.5  |



|      |        |       |       |       |       |
|------|--------|-------|-------|-------|-------|
| 4240 | 142.32 | 87.99 | 42.99 | 34.15 | 28.5  |
| 4242 | 142.11 | 87.89 | 42.94 | 34.12 | 28.47 |
| 4244 | 141.96 | 87.84 | 42.92 | 34.09 | 28.46 |
| 4246 | 141.79 | 87.77 | 42.91 | 34.07 | 28.45 |
| 4248 | 141.66 | 87.72 | 42.92 | 34.08 | 28.46 |
| 4250 | 141.48 | 87.68 | 42.92 | 34.08 | 28.47 |
| 4252 | 141.32 | 87.62 | 42.9  | 34.08 | 28.46 |
| 4254 | 141.16 | 87.56 | 42.89 | 34.06 | 28.46 |
| 4256 | 141    | 87.5  | 42.87 | 34.05 | 28.45 |
| 4258 | 140.83 | 87.43 | 42.86 | 34.04 | 28.44 |
| 4260 | 140.65 | 87.36 | 42.83 | 34    | 28.41 |
| 4262 | 140.51 | 87.31 | 42.83 | 34.01 | 28.43 |
| 4264 | 140.28 | 87.21 | 42.78 | 33.95 | 28.38 |
| 4266 | 140.14 | 87.16 | 42.77 | 33.95 | 28.37 |
| 4268 | 140    | 87.12 | 42.77 | 33.96 | 28.38 |
| 4270 | 139.81 | 87.01 | 42.71 | 33.9  | 28.34 |
| 4272 | 139.63 | 86.95 | 42.7  | 33.89 | 28.33 |
| 4274 | 139.48 | 86.89 | 42.68 | 33.86 | 28.31 |
| 4276 | 139.37 | 86.85 | 42.7  | 33.88 | 28.34 |
| 4278 | 139.18 | 86.78 | 42.66 | 33.85 | 28.31 |
| 4280 | 139.02 | 86.7  | 42.64 | 33.83 | 28.29 |
| 4282 | 138.87 | 86.66 | 42.67 | 33.86 | 28.32 |
| 4284 | 138.72 | 86.6  | 42.64 | 33.82 | 28.3  |
| 4286 | 138.55 | 86.51 | 42.61 | 33.8  | 28.27 |
| 4288 | 138.4  | 86.45 | 42.59 | 33.78 | 28.26 |
| 4290 | 138.25 | 86.41 | 42.6  | 33.79 | 28.27 |
| 4292 | 138.09 | 86.34 | 42.58 | 33.77 | 28.25 |
| 4294 | 137.92 | 86.27 | 42.55 | 33.74 | 28.24 |
| 4296 | 137.78 | 86.22 | 42.56 | 33.75 | 28.26 |
| 4298 | 137.64 | 86.17 | 42.57 | 33.76 | 28.28 |
| 4300 | 137.43 | 86.08 | 42.51 | 33.69 | 28.22 |
| 4302 | 137.28 | 86.01 | 42.5  | 33.68 | 28.21 |
| 4304 | 137.13 | 85.99 | 42.51 | 33.7  | 28.22 |
| 4306 | 136.93 | 85.86 | 42.44 | 33.64 | 28.18 |
| 4308 | 136.79 | 85.8  | 42.42 | 33.61 | 28.16 |
| 4310 | 136.66 | 85.77 | 42.43 | 33.62 | 28.17 |
| 4312 | 136.51 | 85.71 | 42.41 | 33.61 | 28.15 |
| 4314 | 136.33 | 85.63 | 42.4  | 33.58 | 28.12 |
| 4316 | 136.19 | 85.59 | 42.4  | 33.59 | 28.14 |
| 4318 | 136.06 | 85.54 | 42.39 | 33.58 | 28.14 |
| 4320 | 135.88 | 85.45 | 42.34 | 33.54 | 28.1  |
| 4322 | 135.73 | 85.41 | 42.34 | 33.54 | 28.1  |
| 4324 | 135.58 | 85.35 | 42.34 | 33.53 | 28.11 |
| 4326 | 135.43 | 85.29 | 42.32 | 33.52 | 28.09 |

|      |        |       |       |       |       |
|------|--------|-------|-------|-------|-------|
| 4328 | 135.22 | 85.19 | 42.28 | 33.47 | 28.07 |
| 4330 | 135.1  | 85.17 | 42.3  | 33.49 | 28.09 |
| 4332 | 134.97 | 85.12 | 42.31 | 33.5  | 28.1  |
| 4334 | 134.83 | 85.08 | 42.31 | 33.51 | 28.11 |
| 4336 | 134.71 | 85.03 | 42.3  | 33.5  | 28.11 |
| 4338 | 134.53 | 84.98 | 42.28 | 33.48 | 28.09 |
| 4340 | 134.36 | 84.88 | 42.24 | 33.44 | 28.06 |
| 4342 | 134.24 | 84.85 | 42.25 | 33.44 | 28.08 |
| 4344 | 134.07 | 84.8  | 42.25 | 33.46 | 28.08 |
| 4346 | 133.91 | 84.71 | 42.2  | 33.42 | 28.04 |
| 4348 | 133.77 | 84.65 | 42.2  | 33.41 | 28.05 |
| 4350 | 133.66 | 84.61 | 42.2  | 33.41 | 28.04 |
| 4352 | 133.47 | 84.54 | 42.19 | 33.4  | 28.04 |
| 4354 | 133.35 | 84.47 | 42.15 | 33.37 | 28.02 |
| 4356 | 133.17 | 84.4  | 42.14 | 33.35 | 28    |
| 4358 | 133.03 | 84.34 | 42.12 | 33.34 | 27.99 |
| 4360 | 132.88 | 84.28 | 42.11 | 33.32 | 27.99 |
| 4362 | 132.71 | 84.23 | 42.09 | 33.3  | 27.98 |
| 4364 | 132.56 | 84.15 | 42.08 | 33.29 | 27.98 |
| 4366 | 132.41 | 84.09 | 42.07 | 33.28 | 27.97 |
| 4368 | 132.27 | 84.04 | 42.05 | 33.27 | 27.96 |
| 4370 | 132.12 | 83.99 | 42.06 | 33.27 | 27.97 |
| 4372 | 131.97 | 83.92 | 42.03 | 33.25 | 27.95 |
| 4374 | 131.8  | 83.84 | 42.01 | 33.22 | 27.93 |
| 4376 | 131.66 | 83.8  | 42    | 33.22 | 27.94 |
| 4378 | 131.52 | 83.74 | 41.99 | 33.22 | 27.93 |
| 4380 | 131.38 | 83.69 | 41.97 | 33.2  | 27.93 |
| 4382 | 131.23 | 83.61 | 41.95 | 33.17 | 27.91 |
| 4384 | 131.11 | 83.58 | 41.95 | 33.18 | 27.9  |
| 4386 | 130.89 | 83.47 | 41.9  | 33.12 | 27.85 |
| 4388 | 130.78 | 83.44 | 41.91 | 33.14 | 27.89 |
| 4390 | 130.67 | 83.4  | 41.91 | 33.15 | 27.89 |
| 4392 | 130.52 | 83.32 | 41.88 | 33.11 | 27.86 |
| 4394 | 130.37 | 83.28 | 41.89 | 33.12 | 27.87 |
| 4396 | 130.22 | 83.22 | 41.88 | 33.11 | 27.88 |
| 4398 | 130.09 | 83.17 | 41.86 | 33.09 | 27.86 |
| 4400 | 129.95 | 83.12 | 41.86 | 33.08 | 27.86 |
| 4402 | 129.78 | 83.05 | 41.85 | 33.07 | 27.85 |
| 4404 | 129.64 | 83    | 41.83 | 33.06 | 27.84 |
| 4406 | 129.5  | 82.94 | 41.82 | 33.05 | 27.84 |
| 4408 | 129.34 | 82.88 | 41.81 | 33.04 | 27.83 |
| 4410 | 129.2  | 82.82 | 41.8  | 33.02 | 27.83 |
| 4412 | 129.06 | 82.76 | 41.78 | 33.01 | 27.83 |
| 4414 | 128.94 | 82.72 | 41.79 | 33.03 | 27.86 |

|      |        |       |       |       |       |
|------|--------|-------|-------|-------|-------|
| 4416 | 128.8  | 82.65 | 41.76 | 33    | 27.82 |
| 4418 | 128.64 | 82.61 | 41.77 | 32.99 | 27.82 |
| 4420 | 128.52 | 82.56 | 41.76 | 32.99 | 27.83 |
| 4422 | 128.37 | 82.49 | 41.75 | 32.99 | 27.82 |
| 4424 | 128.2  | 82.41 | 41.72 | 32.95 | 27.78 |
| 4426 | 128.05 | 82.34 | 41.7  | 32.93 | 27.76 |
| 4428 | 127.94 | 82.31 | 41.69 | 32.94 | 27.78 |
| 4430 | 127.79 | 82.24 | 41.67 | 32.92 | 27.75 |
| 4432 | 127.66 | 82.2  | 41.69 | 32.91 | 27.76 |
| 4434 | 127.51 | 82.12 | 41.66 | 32.9  | 27.75 |
| 4436 | 127.4  | 82.09 | 41.67 | 32.9  | 27.77 |
| 4438 | 127.24 | 82.01 | 41.63 | 32.87 | 27.74 |
| 4440 | 127.1  | 81.95 | 41.61 | 32.86 | 27.74 |
| 4442 | 126.94 | 81.89 | 41.59 | 32.85 | 27.73 |
| 4444 | 126.81 | 81.83 | 41.59 | 32.83 | 27.72 |
| 4446 | 126.67 | 81.79 | 41.58 | 32.82 | 27.72 |
| 4448 | 126.58 | 81.77 | 41.6  | 32.85 | 27.74 |
| 4450 | 126.45 | 81.73 | 41.61 | 32.87 | 27.76 |
| 4452 | 126.32 | 81.66 | 41.59 | 32.86 | 27.74 |
| 4454 | 126.19 | 81.6  | 41.57 | 32.84 | 27.73 |
| 4456 | 126.02 | 81.55 | 41.55 | 32.82 | 27.72 |
| 4458 | 125.86 | 81.46 | 41.52 | 32.8  | 27.69 |
| 4460 | 125.72 | 81.39 | 41.5  | 32.76 | 27.67 |
| 4462 | 125.59 | 81.34 | 41.49 | 32.75 | 27.67 |
| 4464 | 125.43 | 81.29 | 41.48 | 32.74 | 27.66 |
| 4466 | 125.31 | 81.23 | 41.46 | 32.73 | 27.66 |
| 4468 | 125.17 | 81.17 | 41.44 | 32.71 | 27.65 |
| 4470 | 125.03 | 81.11 | 41.43 | 32.7  | 27.64 |
| 4472 | 124.9  | 81.06 | 41.42 | 32.68 | 27.64 |
| 4474 | 124.79 | 81.04 | 41.44 | 32.71 | 27.66 |
| 4476 | 124.65 | 80.98 | 41.43 | 32.7  | 27.67 |
| 4478 | 124.48 | 80.89 | 41.39 | 32.66 | 27.63 |
| 4480 | 124.32 | 80.83 | 41.37 | 32.64 | 27.61 |
| 4482 | 124.19 | 80.78 | 41.36 | 32.64 | 27.6  |
| 4484 | 124.08 | 80.73 | 41.37 | 32.63 | 27.6  |
| 4486 | 123.97 | 80.71 | 41.37 | 32.65 | 27.63 |
| 4488 | 123.83 | 80.63 | 41.35 | 32.63 | 27.6  |
| 4490 | 123.63 | 80.52 | 41.28 | 32.58 | 27.56 |
| 4492 | 123.51 | 80.48 | 41.29 | 32.58 | 27.57 |
| 4494 | 123.4  | 80.44 | 41.29 | 32.58 | 27.57 |
| 4496 | 123.27 | 80.39 | 41.28 | 32.58 | 27.57 |
| 4498 | 123.09 | 80.29 | 41.23 | 32.52 | 27.53 |
| 4500 | 122.96 | 80.23 | 41.21 | 32.52 | 27.53 |
| 4502 | 122.85 | 80.2  | 41.23 | 32.52 | 27.55 |

|      |        |       |       |       |       |
|------|--------|-------|-------|-------|-------|
| 4504 | 122.74 | 80.15 | 41.23 | 32.52 | 27.55 |
| 4506 | 122.58 | 80.09 | 41.22 | 32.51 | 27.54 |
| 4508 | 122.46 | 80.04 | 41.21 | 32.5  | 27.55 |
| 4510 | 122.32 | 79.98 | 41.19 | 32.48 | 27.53 |
| 4512 | 122.19 | 79.92 | 41.17 | 32.46 | 27.52 |
| 4514 | 122.06 | 79.88 | 41.18 | 32.46 | 27.52 |
| 4516 | 121.92 | 79.82 | 41.15 | 32.46 | 27.5  |
| 4518 | 121.77 | 79.74 | 41.11 | 32.42 | 27.47 |
| 4520 | 121.68 | 79.72 | 41.13 | 32.44 | 27.5  |
| 4522 | 121.55 | 79.66 | 41.13 | 32.44 | 27.51 |
| 4524 | 121.41 | 79.61 | 41.11 | 32.42 | 27.49 |
| 4526 | 121.28 | 79.56 | 41.1  | 32.41 | 27.48 |
| 4528 | 121.14 | 79.51 | 41.1  | 32.4  | 27.48 |
| 4530 | 121.02 | 79.44 | 41.08 | 32.39 | 27.47 |
| 4532 | 120.89 | 79.39 | 41.06 | 32.38 | 27.46 |
| 4534 | 120.76 | 79.34 | 41.05 | 32.36 | 27.46 |
| 4536 | 120.61 | 79.28 | 41.03 | 32.35 | 27.45 |
| 4538 | 120.51 | 79.22 | 41.03 | 32.35 | 27.46 |
| 4540 | 120.36 | 79.17 | 41.01 | 32.33 | 27.44 |
| 4542 | 120.27 | 79.15 | 41.05 | 32.37 | 27.48 |
| 4544 | 120.13 | 79.09 | 41.01 | 32.33 | 27.45 |
| 4546 | 119.96 | 79    | 40.97 | 32.28 | 27.4  |
| 4548 | 119.88 | 78.97 | 40.98 | 32.29 | 27.43 |
| 4550 | 119.73 | 78.91 | 40.98 | 32.29 | 27.43 |
| 4552 | 119.58 | 78.86 | 40.96 | 32.27 | 27.42 |
| 4554 | 119.49 | 78.8  | 40.94 | 32.26 | 27.42 |
| 4556 | 119.32 | 78.73 | 40.92 | 32.24 | 27.39 |
| 4558 | 119.21 | 78.67 | 40.9  | 32.23 | 27.38 |
| 4560 | 119.08 | 78.63 | 40.91 | 32.24 | 27.39 |
| 4562 | 118.96 | 78.58 | 40.9  | 32.24 | 27.39 |
| 4564 | 118.83 | 78.52 | 40.89 | 32.22 | 27.38 |
| 4566 | 118.71 | 78.47 | 40.87 | 32.21 | 27.37 |
| 4568 | 118.6  | 78.43 | 40.88 | 32.22 | 27.39 |
| 4570 | 118.45 | 78.36 | 40.85 | 32.2  | 27.37 |
| 4572 | 118.33 | 78.3  | 40.83 | 32.18 | 27.36 |
| 4574 | 118.2  | 78.24 | 40.82 | 32.16 | 27.35 |
| 4576 | 118.02 | 78.17 | 40.78 | 32.13 | 27.32 |
| 4578 | 117.94 | 78.12 | 40.79 | 32.13 | 27.33 |
| 4580 | 117.81 | 78.08 | 40.79 | 32.13 | 27.34 |
| 4582 | 117.69 | 78.03 | 40.78 | 32.12 | 27.33 |
| 4584 | 117.58 | 77.98 | 40.77 | 32.11 | 27.33 |
| 4586 | 117.43 | 77.92 | 40.76 | 32.1  | 27.33 |
| 4588 | 117.29 | 77.85 | 40.72 | 32.06 | 27.28 |
| 4590 | 117.18 | 77.79 | 40.69 | 32.04 | 27.27 |

|      |        |       |       |       |       |
|------|--------|-------|-------|-------|-------|
| 4592 | 117.07 | 77.75 | 40.7  | 32.06 | 27.29 |
| 4594 | 116.91 | 77.69 | 40.69 | 32.04 | 27.26 |
| 4596 | 116.78 | 77.61 | 40.63 | 32.01 | 27.23 |
| 4598 | 116.65 | 77.55 | 40.62 | 31.98 | 27.23 |
| 4600 | 116.56 | 77.54 | 40.66 | 32.03 | 27.26 |
| 4602 | 116.42 | 77.46 | 40.63 | 32    | 27.23 |
| 4604 | 116.34 | 77.46 | 40.66 | 32.03 | 27.26 |
| 4606 | 116.21 | 77.39 | 40.63 | 32    | 27.24 |
| 4608 | 116.05 | 77.33 | 40.61 | 31.98 | 27.23 |
| 4610 | 115.94 | 77.27 | 40.6  | 31.98 | 27.23 |
| 4612 | 115.84 | 77.24 | 40.61 | 31.99 | 27.25 |
| 4614 | 115.73 | 77.2  | 40.61 | 31.98 | 27.25 |
| 4616 | 115.61 | 77.15 | 40.59 | 31.96 | 27.24 |
| 4618 | 115.47 | 77.09 | 40.57 | 31.94 | 27.22 |
| 4620 | 115.35 | 77.03 | 40.57 | 31.94 | 27.23 |
| 4622 | 115.24 | 76.99 | 40.56 | 31.93 | 27.22 |
| 4624 | 115.12 | 76.94 | 40.55 | 31.93 | 27.22 |
| 4626 | 114.99 | 76.88 | 40.53 | 31.91 | 27.21 |
| 4628 | 114.84 | 76.78 | 40.47 | 31.86 | 27.18 |
| 4630 | 114.72 | 76.74 | 40.47 | 31.87 | 27.16 |
| 4632 | 114.63 | 76.72 | 40.5  | 31.89 | 27.19 |
| 4634 | 114.48 | 76.65 | 40.47 | 31.87 | 27.16 |
| 4636 | 114.37 | 76.61 | 40.46 | 31.86 | 27.16 |
| 4638 | 114.28 | 76.58 | 40.46 | 31.86 | 27.17 |
| 4640 | 114.12 | 76.49 | 40.43 | 31.83 | 27.13 |
| 4642 | 114    | 76.44 | 40.42 | 31.82 | 27.13 |
| 4644 | 113.92 | 76.43 | 40.44 | 31.85 | 27.16 |
| 4646 | 113.8  | 76.38 | 40.43 | 31.83 | 27.16 |
| 4648 | 113.67 | 76.33 | 40.42 | 31.83 | 27.14 |
| 4650 | 113.55 | 76.26 | 40.41 | 31.81 | 27.14 |
| 4652 | 113.42 | 76.2  | 40.37 | 31.77 | 27.1  |
| 4654 | 113.32 | 76.17 | 40.38 | 31.78 | 27.13 |
| 4656 | 113.18 | 76.12 | 40.37 | 31.77 | 27.13 |
| 4658 | 113.07 | 76.07 | 40.36 | 31.76 | 27.12 |
| 4660 | 112.96 | 76.01 | 40.35 | 31.75 | 27.12 |
| 4662 | 112.87 | 75.97 | 40.36 | 31.75 | 27.12 |
| 4664 | 112.75 | 75.93 | 40.35 | 31.75 | 27.11 |
| 4666 | 112.61 | 75.86 | 40.33 | 31.74 | 27.12 |
| 4668 | 112.5  | 75.81 | 40.31 | 31.72 | 27.1  |
| 4670 | 112.4  | 75.76 | 40.3  | 31.71 | 27.11 |
| 4672 | 112.25 | 75.71 | 40.28 | 31.69 | 27.09 |
| 4674 | 112.15 | 75.64 | 40.28 | 31.68 | 27.08 |
| 4676 | 112.05 | 75.6  | 40.27 | 31.68 | 27.07 |
| 4678 | 111.94 | 75.55 | 40.26 | 31.68 | 27.07 |

|      |        |       |       |       |       |
|------|--------|-------|-------|-------|-------|
| 4680 | 111.78 | 75.47 | 40.23 | 31.65 | 27.05 |
| 4682 | 111.68 | 75.43 | 40.23 | 31.65 | 27.05 |
| 4684 | 111.58 | 75.39 | 40.22 | 31.65 | 27.05 |
| 4686 | 111.47 | 75.34 | 40.21 | 31.63 | 27.05 |
| 4688 | 111.36 | 75.29 | 40.2  | 31.63 | 27.04 |
| 4690 | 111.21 | 75.22 | 40.17 | 31.6  | 27.02 |
| 4692 | 111.07 | 75.15 | 40.14 | 31.57 | 26.99 |
| 4694 | 110.98 | 75.11 | 40.15 | 31.58 | 27.02 |
| 4696 | 110.86 | 75.09 | 40.15 | 31.59 | 27.02 |
| 4698 | 110.76 | 75.02 | 40.14 | 31.57 | 27    |
| 4700 | 110.64 | 74.96 | 40.11 | 31.56 | 26.99 |
| 4702 | 110.53 | 74.91 | 40.1  | 31.55 | 26.99 |
| 4704 | 110.45 | 74.89 | 40.11 | 31.56 | 26.99 |
| 4706 | 110.31 | 74.84 | 40.1  | 31.55 | 26.99 |
| 4708 | 110.15 | 74.74 | 40.05 | 31.5  | 26.94 |
| 4710 | 110.06 | 74.7  | 40.04 | 31.48 | 26.92 |
| 4712 | 109.93 | 74.63 | 40.01 | 31.46 | 26.92 |
| 4714 | 109.82 | 74.61 | 40.03 | 31.48 | 26.93 |
| 4716 | 109.7  | 74.53 | 39.99 | 31.45 | 26.89 |
| 4718 | 109.58 | 74.48 | 39.98 | 31.44 | 26.88 |
| 4720 | 109.47 | 74.43 | 39.96 | 31.42 | 26.88 |
| 4722 | 109.35 | 74.39 | 39.97 | 31.42 | 26.9  |
| 4724 | 109.22 | 74.32 | 39.94 | 31.4  | 26.87 |
| 4726 | 109.11 | 74.27 | 39.93 | 31.38 | 26.86 |
| 4728 | 109.02 | 74.25 | 39.94 | 31.4  | 26.9  |
| 4730 | 108.92 | 74.21 | 39.95 | 31.4  | 26.91 |
| 4732 | 108.78 | 74.12 | 39.89 | 31.36 | 26.86 |
| 4734 | 108.67 | 74.09 | 39.9  | 31.35 | 26.85 |
| 4736 | 108.55 | 74.03 | 39.88 | 31.34 | 26.85 |
| 4738 | 108.44 | 73.97 | 39.86 | 31.33 | 26.83 |
| 4740 | 108.33 | 73.93 | 39.85 | 31.32 | 26.82 |
| 4742 | 108.22 | 73.88 | 39.84 | 31.31 | 26.82 |
| 4744 | 108.11 | 73.83 | 39.82 | 31.3  | 26.82 |
| 4746 | 108    | 73.78 | 39.82 | 31.29 | 26.81 |
| 4748 | 107.89 | 73.72 | 39.8  | 31.28 | 26.8  |
| 4750 | 107.79 | 73.67 | 39.79 | 31.27 | 26.81 |
| 4752 | 107.7  | 73.63 | 39.78 | 31.27 | 26.8  |
| 4754 | 107.56 | 73.56 | 39.76 | 31.24 | 26.77 |
| 4756 | 107.49 | 73.56 | 39.79 | 31.29 | 26.82 |
| 4758 | 107.36 | 73.49 | 39.76 | 31.26 | 26.78 |
| 4760 | 107.24 | 73.44 | 39.75 | 31.24 | 26.78 |
| 4762 | 107.14 | 73.38 | 39.74 | 31.24 | 26.77 |
| 4764 | 107.02 | 73.33 | 39.72 | 31.21 | 26.76 |
| 4766 | 106.93 | 73.29 | 39.72 | 31.22 | 26.76 |

|      |        |       |       |       |       |
|------|--------|-------|-------|-------|-------|
| 4768 | 106.85 | 73.26 | 39.73 | 31.23 | 26.78 |
| 4770 | 106.73 | 73.21 | 39.72 | 31.22 | 26.77 |
| 4772 | 106.66 | 73.2  | 39.75 | 31.25 | 26.81 |
| 4774 | 106.56 | 73.15 | 39.73 | 31.24 | 26.8  |
| 4776 | 106.41 | 73.06 | 39.69 | 31.2  | 26.76 |
| 4778 | 106.29 | 73    | 39.67 | 31.18 | 26.75 |
| 4780 | 106.16 | 72.94 | 39.64 | 31.15 | 26.73 |
| 4782 | 106.05 | 72.89 | 39.63 | 31.14 | 26.72 |
| 4784 | 105.94 | 72.84 | 39.63 | 31.15 | 26.73 |
| 4786 | 105.88 | 72.85 | 39.67 | 31.18 | 26.77 |
| 4788 | 105.75 | 72.76 | 39.62 | 31.13 | 26.74 |
| 4790 | 105.64 | 72.72 | 39.61 | 31.12 | 26.73 |
| 4792 | 105.58 | 72.71 | 39.63 | 31.15 | 26.77 |
| 4794 | 105.46 | 72.66 | 39.63 | 31.14 | 26.76 |
| 4796 | 105.35 | 72.61 | 39.62 | 31.13 | 26.75 |
| 4798 | 105.27 | 72.58 | 39.63 | 31.15 | 26.75 |
| 4800 | 105.17 | 72.54 | 39.62 | 31.14 | 26.75 |
| 4802 | 105.04 | 72.47 | 39.59 | 31.12 | 26.73 |
| 4804 | 104.93 | 72.42 | 39.58 | 31.09 | 26.72 |
| 4806 | 104.81 | 72.35 | 39.55 | 31.07 | 26.7  |
| 4808 | 104.68 | 72.3  | 39.52 | 31.04 | 26.69 |
| 4810 | 104.61 | 72.27 | 39.54 | 31.07 | 26.72 |
| 4812 | 104.47 | 72.2  | 39.5  | 31.04 | 26.67 |
| 4814 | 104.36 | 72.14 | 39.47 | 31.01 | 26.64 |
| 4816 | 104.26 | 72.1  | 39.47 | 31.02 | 26.64 |
| 4818 | 104.17 | 72.09 | 39.49 | 31.04 | 26.68 |
| 4820 | 104.08 | 72.04 | 39.49 | 31.04 | 26.68 |
| 4822 | 104    | 72    | 39.49 | 31.04 | 26.68 |
| 4824 | 103.89 | 71.96 | 39.48 | 31.04 | 26.68 |
| 4826 | 103.73 | 71.87 | 39.44 | 31    | 26.64 |
| 4828 | 103.65 | 71.84 | 39.43 | 30.99 | 26.63 |
| 4830 | 103.58 | 71.81 | 39.44 | 31.01 | 26.66 |
| 4832 | 103.44 | 71.75 | 39.41 | 30.97 | 26.62 |
| 4834 | 103.36 | 71.71 | 39.42 | 30.98 | 26.64 |
| 4836 | 103.24 | 71.63 | 39.37 | 30.93 | 26.6  |
| 4838 | 103.14 | 71.58 | 39.37 | 30.93 | 26.6  |
| 4840 | 103.03 | 71.53 | 39.34 | 30.91 | 26.59 |
| 4842 | 102.91 | 71.48 | 39.35 | 30.91 | 26.6  |
| 4844 | 102.83 | 71.45 | 39.36 | 30.92 | 26.62 |
| 4846 | 102.72 | 71.4  | 39.33 | 30.91 | 26.61 |
| 4848 | 102.64 | 71.34 | 39.32 | 30.89 | 26.59 |
| 4850 | 102.49 | 71.29 | 39.31 | 30.88 | 26.59 |
| 4852 | 102.43 | 71.27 | 39.32 | 30.88 | 26.6  |
| 4854 | 102.3  | 71.19 | 39.29 | 30.86 | 26.56 |

|      |        |       |       |       |       |
|------|--------|-------|-------|-------|-------|
| 4856 | 102.2  | 71.14 | 39.27 | 30.84 | 26.54 |
| 4858 | 102.15 | 71.14 | 39.3  | 30.88 | 26.58 |
| 4860 | 102.05 | 71.1  | 39.3  | 30.88 | 26.59 |
| 4862 | 101.95 | 71.06 | 39.29 | 30.88 | 26.59 |
| 4864 | 101.81 | 70.97 | 39.24 | 30.83 | 26.55 |
| 4866 | 101.72 | 70.94 | 39.25 | 30.83 | 26.55 |
| 4868 | 101.59 | 70.86 | 39.21 | 30.8  | 26.52 |
| 4870 | 101.49 | 70.82 | 39.2  | 30.79 | 26.51 |
| 4872 | 101.39 | 70.78 | 39.19 | 30.79 | 26.51 |
| 4874 | 101.27 | 70.72 | 39.17 | 30.78 | 26.5  |
| 4876 | 101.22 | 70.73 | 39.2  | 30.81 | 26.55 |
| 4878 | 101.11 | 70.66 | 39.18 | 30.78 | 26.52 |
| 4880 | 101.01 | 70.63 | 39.19 | 30.78 | 26.54 |
| 4882 | 100.9  | 70.57 | 39.18 | 30.77 | 26.53 |
| 4884 | 100.82 | 70.54 | 39.17 | 30.77 | 26.53 |
| 4886 | 100.72 | 70.5  | 39.16 | 30.76 | 26.53 |
| 4888 | 100.6  | 70.43 | 39.12 | 30.73 | 26.49 |
| 4890 | 100.52 | 70.4  | 39.14 | 30.75 | 26.51 |
| 4892 | 100.43 | 70.35 | 39.13 | 30.75 | 26.5  |
| 4894 | 100.34 | 70.31 | 39.12 | 30.75 | 26.5  |
| 4896 | 100.24 | 70.27 | 39.11 | 30.74 | 26.49 |
| 4898 | 100.13 | 70.22 | 39.1  | 30.73 | 26.5  |
| 4900 | 100.05 | 70.18 | 39.09 | 30.71 | 26.49 |
| 4902 | 99.95  | 70.13 | 39.08 | 30.7  | 26.49 |
| 4904 | 99.85  | 70.09 | 39.08 | 30.7  | 26.47 |
| 4906 | 99.72  | 70.02 | 39.05 | 30.68 | 26.47 |
| 4908 | 99.64  | 69.99 | 39.05 | 30.69 | 26.47 |
| 4910 | 99.51  | 69.89 | 38.99 | 30.62 | 26.41 |
| 4912 | 99.42  | 69.87 | 39    | 30.63 | 26.43 |
| 4914 | 99.31  | 69.83 | 38.99 | 30.64 | 26.44 |
| 4916 | 99.23  | 69.79 | 38.99 | 30.63 | 26.43 |
| 4918 | 99.11  | 69.73 | 38.96 | 30.6  | 26.41 |
| 4920 | 99     | 69.67 | 38.94 | 30.58 | 26.39 |
| 4922 | 98.94  | 69.66 | 38.97 | 30.61 | 26.44 |
| 4924 | 98.83  | 69.6  | 38.95 | 30.58 | 26.41 |
| 4926 | 98.75  | 69.57 | 38.95 | 30.59 | 26.41 |
| 4928 | 98.63  | 69.5  | 38.92 | 30.56 | 26.39 |
| 4930 | 98.55  | 69.46 | 38.92 | 30.57 | 26.4  |
| 4932 | 98.47  | 69.44 | 38.93 | 30.57 | 26.41 |
| 4934 | 98.38  | 69.39 | 38.91 | 30.55 | 26.39 |
| 4936 | 98.29  | 69.34 | 38.91 | 30.56 | 26.41 |
| 4938 | 98.17  | 69.28 | 38.87 | 30.52 | 26.37 |
| 4940 | 98.09  | 69.26 | 38.88 | 30.54 | 26.39 |
| 4942 | 98.01  | 69.22 | 38.88 | 30.54 | 26.39 |



|      |       |       |       |       |       |
|------|-------|-------|-------|-------|-------|
| 4944 | 97.92 | 69.17 | 38.87 | 30.54 | 26.39 |
| 4946 | 97.81 | 69.12 | 38.87 | 30.53 | 26.38 |
| 4948 | 97.72 | 69.07 | 38.85 | 30.52 | 26.38 |
| 4950 | 97.6  | 69.01 | 38.82 | 30.5  | 26.36 |
| 4952 | 97.52 | 68.99 | 38.82 | 30.51 | 26.36 |
| 4954 | 97.42 | 68.94 | 38.82 | 30.49 | 26.35 |
| 4956 | 97.33 | 68.9  | 38.81 | 30.49 | 26.36 |
| 4958 | 97.18 | 68.8  | 38.75 | 30.42 | 26.31 |
| 4960 | 97.08 | 68.74 | 38.72 | 30.4  | 26.28 |
| 4962 | 96.98 | 68.71 | 38.72 | 30.41 | 26.29 |
| 4964 | 96.88 | 68.66 | 38.71 | 30.39 | 26.28 |
| 4966 | 96.78 | 68.61 | 38.68 | 30.36 | 26.25 |
| 4968 | 96.68 | 68.56 | 38.68 | 30.37 | 26.26 |
| 4970 | 96.58 | 68.5  | 38.66 | 30.34 | 26.26 |
| 4972 | 96.52 | 68.49 | 38.66 | 30.37 | 26.26 |
| 4974 | 96.43 | 68.45 | 38.66 | 30.37 | 26.25 |
| 4976 | 96.34 | 68.41 | 38.65 | 30.36 | 26.25 |
| 4978 | 96.23 | 68.35 | 38.65 | 30.35 | 26.24 |
| 4980 | 96.14 | 68.32 | 38.64 | 30.33 | 26.24 |
| 4982 | 96.01 | 68.23 | 38.58 | 30.3  | 26.19 |
| 4984 | 95.93 | 68.2  | 38.58 | 30.3  | 26.21 |
| 4986 | 95.83 | 68.15 | 38.57 | 30.27 | 26.19 |
| 4988 | 95.73 | 68.09 | 38.56 | 30.26 | 26.19 |
| 4990 | 95.65 | 68.06 | 38.55 | 30.26 | 26.19 |
| 4992 | 95.55 | 68.03 | 38.54 | 30.26 | 26.18 |
| 4994 | 95.48 | 67.99 | 38.54 | 30.25 | 26.19 |
| 4996 | 95.38 | 67.95 | 38.54 | 30.24 | 26.17 |
| 4998 | 95.28 | 67.88 | 38.5  | 30.21 | 26.16 |
| 5000 | 95.2  | 67.85 | 38.5  | 30.22 | 26.17 |
| 5002 | 95.13 | 67.83 | 38.52 | 30.24 | 26.2  |
| 5004 | 95.03 | 67.77 | 38.51 | 30.23 | 26.18 |
| 5006 | 94.96 | 67.75 | 38.51 | 30.23 | 26.18 |
| 5008 | 94.88 | 67.72 | 38.5  | 30.23 | 26.19 |
| 5010 | 94.76 | 67.65 | 38.48 | 30.22 | 26.17 |
| 5012 | 94.71 | 67.64 | 38.51 | 30.23 | 26.21 |
| 5014 | 94.62 | 67.6  | 38.49 | 30.23 | 26.2  |
| 5016 | 94.5  | 67.53 | 38.46 | 30.19 | 26.16 |
| 5018 | 94.38 | 67.45 | 38.44 | 30.16 | 26.13 |
| 5020 | 94.29 | 67.41 | 38.43 | 30.17 | 26.14 |
| 5022 | 94.23 | 67.4  | 38.44 | 30.19 | 26.15 |
| 5024 | 94.11 | 67.35 | 38.41 | 30.17 | 26.13 |
| 5026 | 94.04 | 67.31 | 38.4  | 30.16 | 26.14 |
| 5028 | 93.96 | 67.26 | 38.4  | 30.15 | 26.11 |
| 5030 | 93.88 | 67.23 | 38.39 | 30.15 | 26.13 |

|      |       |       |       |       |       |
|------|-------|-------|-------|-------|-------|
| 5032 | 93.78 | 67.18 | 38.39 | 30.15 | 26.13 |
| 5034 | 93.69 | 67.13 | 38.36 | 30.12 | 26.11 |
| 5036 | 93.58 | 67.07 | 38.34 | 30.1  | 26.09 |
| 5038 | 93.46 | 67    | 38.3  | 30.07 | 26.05 |
| 5040 | 93.4  | 67    | 38.33 | 30.1  | 26.08 |
| 5042 | 93.3  | 66.94 | 38.3  | 30.08 | 26.07 |
| 5044 | 93.24 | 66.9  | 38.31 | 30.09 | 26.08 |
| 5046 | 93.17 | 66.88 | 38.32 | 30.1  | 26.09 |
| 5048 | 93.08 | 66.84 | 38.31 | 30.1  | 26.09 |
| 5050 | 92.95 | 66.77 | 38.26 | 30.06 | 26.07 |
| 5052 | 92.87 | 66.73 | 38.25 | 30.04 | 26.06 |
| 5054 | 92.78 | 66.69 | 38.25 | 30.03 | 26.04 |
| 5056 | 92.72 | 66.66 | 38.25 | 30.04 | 26.05 |
| 5058 | 92.64 | 66.64 | 38.26 | 30.05 | 26.08 |
| 5060 | 92.55 | 66.6  | 38.25 | 30.05 | 26.07 |
| 5062 | 92.47 | 66.56 | 38.25 | 30.04 | 26.06 |
| 5064 | 92.39 | 66.51 | 38.24 | 30.04 | 26.06 |
| 5066 | 92.28 | 66.46 | 38.22 | 30.03 | 26.06 |
| 5068 | 92.2  | 66.42 | 38.22 | 30.02 | 26.05 |
| 5070 | 92.12 | 66.38 | 38.2  | 30.01 | 26.05 |
| 5072 | 92.03 | 66.34 | 38.19 | 30    | 26.04 |
| 5074 | 91.94 | 66.3  | 38.19 | 30    | 26.04 |
| 5076 | 91.86 | 66.27 | 38.19 | 30    | 26.06 |
| 5078 | 91.78 | 66.24 | 38.18 | 30    | 26.05 |
| 5080 | 91.67 | 66.18 | 38.16 | 29.97 | 26.03 |
| 5082 | 91.57 | 66.12 | 38.14 | 29.95 | 26.02 |
| 5084 | 91.5  | 66.08 | 38.13 | 29.94 | 26.02 |
| 5086 | 91.42 | 66.05 | 38.11 | 29.93 | 26.02 |
| 5088 | 91.34 | 66.01 | 38.12 | 29.91 | 26    |
| 5090 | 91.2  | 65.92 | 38.06 | 29.88 | 25.97 |
| 5092 | 91.15 | 65.91 | 38.08 | 29.91 | 26    |
| 5094 | 91.09 | 65.88 | 38.08 | 29.91 | 26    |
| 5096 | 90.98 | 65.83 | 38.06 | 29.88 | 25.98 |
| 5098 | 90.89 | 65.77 | 38.05 | 29.88 | 25.98 |
| 5100 | 90.82 | 65.75 | 38.05 | 29.88 | 25.98 |
| 5102 | 90.75 | 65.71 | 38.04 | 29.88 | 25.99 |
| 5104 | 90.64 | 65.67 | 38.03 | 29.86 | 25.98 |
| 5106 | 90.54 | 65.61 | 38    | 29.84 | 25.96 |
| 5108 | 90.45 | 65.56 | 37.99 | 29.83 | 25.94 |
| 5110 | 90.38 | 65.54 | 38    | 29.84 | 25.96 |
| 5112 | 90.3  | 65.51 | 38    | 29.84 | 25.96 |
| 5114 | 90.22 | 65.46 | 37.99 | 29.84 | 25.96 |
| 5116 | 90.14 | 65.42 | 37.98 | 29.83 | 25.96 |
| 5118 | 90.02 | 65.34 | 37.92 | 29.77 | 25.91 |

|      |       |       |       |       |       |
|------|-------|-------|-------|-------|-------|
| 5120 | 89.96 | 65.31 | 37.94 | 29.79 | 25.93 |
| 5122 | 89.88 | 65.29 | 37.95 | 29.81 | 25.95 |
| 5124 | 89.79 | 65.24 | 37.93 | 29.78 | 25.92 |
| 5126 | 89.72 | 65.21 | 37.93 | 29.78 | 25.94 |
| 5128 | 89.65 | 65.19 | 37.93 | 29.78 | 25.94 |
| 5130 | 89.56 | 65.14 | 37.92 | 29.78 | 25.93 |
| 5132 | 89.49 | 65.1  | 37.91 | 29.78 | 25.92 |
| 5134 | 89.41 | 65.06 | 37.9  | 29.78 | 25.92 |
| 5136 | 89.32 | 65.02 | 37.9  | 29.77 | 25.92 |
| 5138 | 89.24 | 64.98 | 37.89 | 29.76 | 25.91 |
| 5140 | 89.16 | 64.93 | 37.87 | 29.76 | 25.91 |
| 5142 | 89.08 | 64.89 | 37.86 | 29.75 | 25.9  |
| 5144 | 88.97 | 64.85 | 37.85 | 29.73 | 25.89 |
| 5146 | 88.9  | 64.81 | 37.84 | 29.73 | 25.9  |
| 5148 | 88.85 | 64.79 | 37.85 | 29.74 | 25.94 |
| 5150 | 88.75 | 64.73 | 37.83 | 29.7  | 25.89 |
| 5152 | 88.69 | 64.73 | 37.85 | 29.73 | 25.92 |
| 5154 | 88.59 | 64.68 | 37.83 | 29.71 | 25.9  |
| 5156 | 88.52 | 64.65 | 37.83 | 29.72 | 25.92 |
| 5158 | 88.41 | 64.57 | 37.79 | 29.68 | 25.88 |
| 5160 | 88.35 | 64.56 | 37.8  | 29.68 | 25.88 |
| 5162 | 88.27 | 64.52 | 37.8  | 29.7  | 25.91 |
| 5164 | 88.18 | 64.48 | 37.78 | 29.69 | 25.9  |
| 5166 | 88.09 | 64.43 | 37.76 | 29.67 | 25.87 |
| 5168 | 88    | 64.37 | 37.73 | 29.64 | 25.84 |
| 5170 | 87.92 | 64.34 | 37.74 | 29.65 | 25.86 |
| 5172 | 87.85 | 64.3  | 37.73 | 29.65 | 25.86 |
| 5174 | 87.78 | 64.28 | 37.74 | 29.65 | 25.86 |
| 5176 | 87.71 | 64.25 | 37.73 | 29.65 | 25.86 |
| 5178 | 87.6  | 64.19 | 37.71 | 29.63 | 25.85 |
| 5180 | 87.55 | 64.17 | 37.71 | 29.64 | 25.86 |
| 5182 | 87.47 | 64.13 | 37.7  | 29.61 | 25.85 |
| 5184 | 87.36 | 64.07 | 37.67 | 29.59 | 25.83 |
| 5186 | 87.32 | 64.07 | 37.71 | 29.63 | 25.88 |
| 5188 | 87.22 | 64.01 | 37.68 | 29.6  | 25.85 |
| 5190 | 87.15 | 63.98 | 37.68 | 29.6  | 25.86 |
| 5192 | 87.09 | 63.96 | 37.7  | 29.62 | 25.87 |
| 5194 | 87.01 | 63.93 | 37.68 | 29.61 | 25.86 |
| 5196 | 86.9  | 63.85 | 37.63 | 29.58 | 25.82 |
| 5198 | 86.88 | 63.86 | 37.68 | 29.62 | 25.86 |
| 5200 | 86.79 | 63.82 | 37.67 | 29.62 | 25.86 |
| 5202 | 86.71 | 63.79 | 37.66 | 29.62 | 25.87 |
| 5204 | 86.62 | 63.73 | 37.63 | 29.6  | 25.84 |
| 5206 | 86.56 | 63.7  | 37.64 | 29.6  | 25.85 |

|      |       |       |       |       |       |
|------|-------|-------|-------|-------|-------|
| 5208 | 86.44 | 63.64 | 37.6  | 29.57 | 25.83 |
| 5210 | 86.34 | 63.57 | 37.57 | 29.53 | 25.81 |
| 5212 | 86.26 | 63.53 | 37.56 | 29.51 | 25.8  |
| 5214 | 86.21 | 63.51 | 37.58 | 29.53 | 25.81 |
| 5216 | 86.11 | 63.45 | 37.54 | 29.5  | 25.79 |
| 5218 | 86.02 | 63.4  | 37.53 | 29.49 | 25.78 |
| 5220 | 85.94 | 63.37 | 37.52 | 29.48 | 25.78 |
| 5222 | 85.9  | 63.37 | 37.55 | 29.51 | 25.81 |
| 5224 | 85.82 | 63.32 | 37.53 | 29.5  | 25.8  |
| 5226 | 85.74 | 63.29 | 37.52 | 29.5  | 25.8  |
| 5228 | 85.69 | 63.26 | 37.53 | 29.52 | 25.8  |
| 5230 | 85.6  | 63.2  | 37.5  | 29.48 | 25.78 |
| 5232 | 85.52 | 63.16 | 37.48 | 29.46 | 25.77 |
| 5234 | 85.42 | 63.1  | 37.47 | 29.45 | 25.75 |
| 5236 | 85.33 | 63.05 | 37.44 | 29.43 | 25.73 |
| 5238 | 85.27 | 63.03 | 37.45 | 29.43 | 25.74 |
| 5240 | 85.18 | 62.99 | 37.44 | 29.41 | 25.74 |
| 5242 | 85.1  | 62.94 | 37.42 | 29.41 | 25.74 |
| 5244 | 85.03 | 62.91 | 37.42 | 29.41 | 25.74 |
| 5246 | 84.95 | 62.86 | 37.4  | 29.4  | 25.72 |
| 5248 | 84.84 | 62.8  | 37.37 | 29.37 | 25.7  |
| 5250 | 84.74 | 62.75 | 37.34 | 29.35 | 25.68 |
| 5252 | 84.69 | 62.74 | 37.37 | 29.36 | 25.7  |
| 5254 | 84.65 | 62.71 | 37.38 | 29.37 | 25.73 |
| 5256 | 84.56 | 62.67 | 37.35 | 29.35 | 25.71 |
| 5258 | 84.49 | 62.64 | 37.36 | 29.36 | 25.72 |
| 5260 | 84.42 | 62.6  | 37.35 | 29.36 | 25.72 |
| 5262 | 84.34 | 62.57 | 37.34 | 29.35 | 25.71 |
| 5264 | 84.27 | 62.53 | 37.33 | 29.34 | 25.71 |
| 5266 | 84.19 | 62.5  | 37.32 | 29.33 | 25.7  |
| 5268 | 84.14 | 62.47 | 37.33 | 29.34 | 25.73 |
| 5270 | 84.04 | 62.42 | 37.3  | 29.32 | 25.71 |
| 5272 | 83.99 | 62.41 | 37.33 | 29.35 | 25.73 |
| 5274 | 83.92 | 62.38 | 37.32 | 29.35 | 25.75 |
| 5276 | 83.87 | 62.37 | 37.34 | 29.37 | 25.75 |
| 5278 | 83.77 | 62.31 | 37.31 | 29.34 | 25.73 |
| 5280 | 83.72 | 62.3  | 37.33 | 29.36 | 25.75 |
| 5282 | 83.66 | 62.26 | 37.31 | 29.35 | 25.74 |
| 5284 | 83.57 | 62.2  | 37.29 | 29.32 | 25.71 |
| 5286 | 83.5  | 62.17 | 37.29 | 29.33 | 25.73 |
| 5288 | 83.39 | 62.11 | 37.24 | 29.29 | 25.69 |
| 5290 | 83.31 | 62.06 | 37.23 | 29.28 | 25.68 |
| 5292 | 83.23 | 62.01 | 37.21 | 29.25 | 25.67 |
| 5294 | 83.15 | 61.98 | 37.2  | 29.24 | 25.66 |

|      |       |       |       |       |       |
|------|-------|-------|-------|-------|-------|
| 5296 | 83.07 | 61.96 | 37.2  | 29.25 | 25.67 |
| 5298 | 83.04 | 61.94 | 37.22 | 29.27 | 25.7  |
| 5300 | 82.95 | 61.89 | 37.19 | 29.25 | 25.68 |
| 5302 | 82.9  | 61.87 | 37.19 | 29.25 | 25.66 |
| 5304 | 82.82 | 61.83 | 37.2  | 29.26 | 25.68 |
| 5306 | 82.74 | 61.79 | 37.18 | 29.23 | 25.66 |
| 5308 | 82.64 | 61.73 | 37.15 | 29.24 | 25.67 |
| 5310 | 82.62 | 61.74 | 37.18 | 29.25 | 25.69 |
| 5312 | 82.58 | 61.73 | 37.2  | 29.27 | 25.7  |
| 5314 | 82.47 | 61.67 | 37.18 | 29.25 | 25.69 |
| 5316 | 82.39 | 61.61 | 37.15 | 29.23 | 25.68 |
| 5318 | 82.33 | 61.59 | 37.16 | 29.24 | 25.68 |
| 5320 | 82.25 | 61.55 | 37.14 | 29.22 | 25.67 |
| 5322 | 82.16 | 61.5  | 37.12 | 29.2  | 25.66 |
| 5324 | 82.1  | 61.47 | 37.12 | 29.19 | 25.65 |
| 5326 | 82.02 | 61.43 | 37.11 | 29.2  | 25.66 |
| 5328 | 81.96 | 61.41 | 37.11 | 29.21 | 25.67 |
| 5330 | 81.89 | 61.37 | 37.11 | 29.2  | 25.66 |
| 5332 | 81.8  | 61.32 | 37.08 | 29.17 | 25.64 |
| 5334 | 81.74 | 61.29 | 37.08 | 29.18 | 25.64 |
| 5336 | 81.61 | 61.19 | 37.01 | 29.11 | 25.58 |
| 5338 | 81.56 | 61.18 | 37.03 | 29.14 | 25.61 |
| 5340 | 81.51 | 61.16 | 37.04 | 29.15 | 25.63 |
| 5342 | 81.39 | 61.08 | 36.99 | 29.1  | 25.58 |
| 5344 | 81.34 | 61.07 | 37.01 | 29.12 | 25.6  |
| 5346 | 81.27 | 61.02 | 36.99 | 29.1  | 25.58 |
| 5348 | 81.19 | 60.99 | 36.97 | 29.1  | 25.58 |
| 5350 | 81.13 | 60.95 | 36.97 | 29.09 | 25.57 |
| 5352 | 81.07 | 60.92 | 36.96 | 29.08 | 25.57 |
| 5354 | 80.99 | 60.88 | 36.95 | 29.07 | 25.57 |
| 5356 | 80.92 | 60.84 | 36.95 | 29.07 | 25.56 |
| 5358 | 80.85 | 60.82 | 36.94 | 29.06 | 25.56 |
| 5360 | 80.77 | 60.76 | 36.92 | 29.06 | 25.55 |
| 5362 | 80.7  | 60.74 | 36.92 | 29.05 | 25.56 |
| 5364 | 80.62 | 60.69 | 36.9  | 29.02 | 25.53 |
| 5366 | 80.55 | 60.67 | 36.89 | 29.03 | 25.54 |
| 5368 | 80.45 | 60.61 | 36.86 | 29    | 25.52 |
| 5370 | 80.4  | 60.58 | 36.87 | 29    | 25.52 |
| 5372 | 80.35 | 60.56 | 36.88 | 29.02 | 25.54 |
| 5374 | 80.28 | 60.53 | 36.87 | 29.02 | 25.54 |
| 5376 | 80.2  | 60.5  | 36.86 | 29.01 | 25.54 |
| 5378 | 80.09 | 60.41 | 36.81 | 28.97 | 25.5  |
| 5380 | 80.06 | 60.42 | 36.84 | 29    | 25.52 |
| 5382 | 80    | 60.39 | 36.84 | 29    | 25.53 |

|      |       |       |       |       |       |
|------|-------|-------|-------|-------|-------|
| 5384 | 79.9  | 60.33 | 36.8  | 28.95 | 25.49 |
| 5386 | 79.83 | 60.29 | 36.79 | 28.97 | 25.51 |
| 5388 | 79.79 | 60.28 | 36.81 | 28.98 | 25.52 |
| 5390 | 79.69 | 60.23 | 36.77 | 28.94 | 25.48 |
| 5392 | 79.61 | 60.17 | 36.74 | 28.92 | 25.47 |
| 5394 | 79.55 | 60.17 | 36.77 | 28.95 | 25.48 |
| 5396 | 79.48 | 60.1  | 36.74 | 28.92 | 25.46 |
| 5398 | 79.41 | 60.07 | 36.72 | 28.9  | 25.46 |
| 5400 | 79.35 | 60.05 | 36.72 | 28.91 | 25.47 |
| 5402 | 79.29 | 60.03 | 36.73 | 28.91 | 25.48 |
| 5404 | 79.23 | 59.98 | 36.71 | 28.88 | 25.46 |
| 5406 | 79.13 | 59.92 | 36.68 | 28.86 | 25.44 |
| 5408 | 79.06 | 59.88 | 36.67 | 28.85 | 25.44 |
| 5410 | 78.99 | 59.85 | 36.67 | 28.85 | 25.45 |
| 5412 | 78.92 | 59.81 | 36.65 | 28.84 | 25.44 |
| 5414 | 78.86 | 59.8  | 36.65 | 28.85 | 25.44 |
| 5416 | 78.78 | 59.75 | 36.64 | 28.84 | 25.43 |
| 5418 | 78.7  | 59.7  | 36.63 | 28.82 | 25.42 |
| 5420 | 78.65 | 59.69 | 36.64 | 28.84 | 25.45 |
| 5422 | 78.59 | 59.66 | 36.64 | 28.84 | 25.45 |
| 5424 | 78.53 | 59.62 | 36.64 | 28.84 | 25.45 |
| 5426 | 78.44 | 59.56 | 36.6  | 28.8  | 25.42 |
| 5428 | 78.38 | 59.54 | 36.6  | 28.82 | 25.42 |
| 5430 | 78.36 | 59.55 | 36.63 | 28.85 | 25.47 |
| 5432 | 78.3  | 59.53 | 36.62 | 28.84 | 25.46 |
| 5434 | 78.19 | 59.45 | 36.58 | 28.81 | 25.42 |
| 5436 | 78.09 | 59.38 | 36.55 | 28.77 | 25.4  |
| 5438 | 78.06 | 59.38 | 36.58 | 28.81 | 25.43 |
| 5440 | 78.01 | 59.36 | 36.57 | 28.81 | 25.42 |
| 5442 | 77.92 | 59.31 | 36.55 | 28.79 | 25.4  |
| 5444 | 77.85 | 59.27 | 36.53 | 28.77 | 25.39 |
| 5446 | 77.78 | 59.23 | 36.52 | 28.76 | 25.39 |
| 5448 | 77.71 | 59.2  | 36.5  | 28.76 | 25.38 |
| 5450 | 77.65 | 59.17 | 36.51 | 28.77 | 25.4  |
| 5452 | 77.6  | 59.13 | 36.51 | 28.75 | 25.39 |
| 5454 | 77.57 | 59.14 | 36.54 | 28.79 | 25.41 |
| 5456 | 77.49 | 59.1  | 36.5  | 28.76 | 25.4  |
| 5458 | 77.41 | 59.05 | 36.51 | 28.76 | 25.41 |
| 5460 | 77.35 | 59.02 | 36.51 | 28.76 | 25.41 |
| 5462 | 77.31 | 59.01 | 36.51 | 28.77 | 25.43 |
| 5464 | 77.2  | 58.93 | 36.46 | 28.71 | 25.37 |
| 5466 | 77.18 | 58.93 | 36.48 | 28.75 | 25.41 |
| 5468 | 77.1  | 58.9  | 36.48 | 28.74 | 25.42 |
| 5470 | 76.99 | 58.81 | 36.42 | 28.68 | 25.36 |

|      |       |       |       |       |       |
|------|-------|-------|-------|-------|-------|
| 5472 | 76.97 | 58.83 | 36.47 | 28.73 | 25.41 |
| 5474 | 76.89 | 58.78 | 36.45 | 28.72 | 25.41 |
| 5476 | 76.85 | 58.77 | 36.46 | 28.73 | 25.41 |
| 5478 | 76.78 | 58.73 | 36.45 | 28.72 | 25.4  |
| 5480 | 76.72 | 58.71 | 36.44 | 28.72 | 25.4  |
| 5482 | 76.66 | 58.67 | 36.43 | 28.72 | 25.4  |
| 5484 | 76.6  | 58.65 | 36.43 | 28.72 | 25.4  |
| 5486 | 76.52 | 58.6  | 36.41 | 28.7  | 25.37 |
| 5488 | 76.49 | 58.59 | 36.43 | 28.73 | 25.41 |
| 5490 | 76.46 | 58.6  | 36.46 | 28.77 | 25.45 |
| 5492 | 76.36 | 58.51 | 36.4  | 28.71 | 25.4  |
| 5494 | 76.26 | 58.46 | 36.37 | 28.68 | 25.37 |
| 5496 | 76.19 | 58.41 | 36.35 | 28.66 | 25.36 |
| 5498 | 76.12 | 58.37 | 36.34 | 28.65 | 25.34 |
| 5500 | 76.09 | 58.36 | 36.36 | 28.67 | 25.37 |
| 5502 | 76.04 | 58.34 | 36.37 | 28.68 | 25.4  |
| 5504 | 75.95 | 58.3  | 36.34 | 28.66 | 25.37 |
| 5506 | 75.89 | 58.27 | 36.34 | 28.66 | 25.37 |
| 5508 | 75.84 | 58.25 | 36.35 | 28.67 | 25.38 |
| 5510 | 75.77 | 58.2  | 36.32 | 28.64 | 25.35 |
| 5512 | 75.69 | 58.16 | 36.32 | 28.64 | 25.36 |
| 5514 | 75.64 | 58.13 | 36.29 | 28.63 | 25.36 |
| 5516 | 75.57 | 58.09 | 36.28 | 28.61 | 25.34 |
| 5518 | 75.5  | 58.06 | 36.28 | 28.61 | 25.35 |
| 5520 | 75.42 | 58.02 | 36.25 | 28.6  | 25.33 |
| 5522 | 75.37 | 57.99 | 36.27 | 28.61 | 25.35 |
| 5524 | 75.31 | 57.96 | 36.26 | 28.6  | 25.34 |
| 5526 | 75.25 | 57.93 | 36.26 | 28.59 | 25.34 |
| 5528 | 75.17 | 57.89 | 36.22 | 28.57 | 25.32 |
| 5530 | 75.1  | 57.86 | 36.23 | 28.57 | 25.34 |
| 5532 | 75.03 | 57.81 | 36.21 | 28.56 | 25.31 |
| 5534 | 74.98 | 57.78 | 36.21 | 28.56 | 25.31 |
| 5536 | 74.92 | 57.77 | 36.21 | 28.56 | 25.32 |
| 5538 | 74.86 | 57.73 | 36.21 | 28.57 | 25.32 |
| 5540 | 74.81 | 57.71 | 36.21 | 28.57 | 25.31 |
| 5542 | 74.75 | 57.68 | 36.21 | 28.57 | 25.32 |
| 5544 | 74.7  | 57.65 | 36.19 | 28.56 | 25.32 |
| 5546 | 74.62 | 57.6  | 36.17 | 28.54 | 25.31 |
| 5548 | 74.57 | 57.58 | 36.17 | 28.55 | 25.32 |
| 5550 | 74.51 | 57.56 | 36.16 | 28.55 | 25.32 |
| 5552 | 74.42 | 57.49 | 36.13 | 28.51 | 25.27 |
| 5554 | 74.36 | 57.46 | 36.11 | 28.52 | 25.29 |
| 5556 | 74.3  | 57.44 | 36.13 | 28.53 | 25.3  |
| 5558 | 74.25 | 57.41 | 36.12 | 28.52 | 25.3  |

|      |       |       |       |       |       |
|------|-------|-------|-------|-------|-------|
| 5560 | 74.19 | 57.38 | 36.12 | 28.52 | 25.29 |
| 5562 | 74.13 | 57.35 | 36.1  | 28.5  | 25.28 |
| 5564 | 74.07 | 57.32 | 36.1  | 28.5  | 25.29 |
| 5566 | 74.03 | 57.31 | 36.11 | 28.51 | 25.29 |
| 5568 | 73.96 | 57.27 | 36.09 | 28.49 | 25.28 |
| 5570 | 73.89 | 57.23 | 36.08 | 28.49 | 25.28 |
| 5572 | 73.84 | 57.2  | 36.07 | 28.5  | 25.28 |
| 5574 | 73.78 | 57.18 | 36.08 | 28.49 | 25.29 |
| 5576 | 73.73 | 57.17 | 36.08 | 28.5  | 25.3  |
| 5578 | 73.66 | 57.12 | 36.06 | 28.49 | 25.29 |
| 5580 | 73.59 | 57.08 | 36.04 | 28.45 | 25.27 |
| 5582 | 73.54 | 57.06 | 36.04 | 28.47 | 25.28 |
| 5584 | 73.45 | 56.99 | 36    | 28.42 | 25.24 |
| 5586 | 73.4  | 56.98 | 36.02 | 28.44 | 25.27 |
| 5588 | 73.35 | 56.96 | 36.02 | 28.44 | 25.28 |
| 5590 | 73.27 | 56.91 | 35.99 | 28.43 | 25.28 |
| 5592 | 73.2  | 56.86 | 35.98 | 28.4  | 25.25 |
| 5594 | 73.13 | 56.83 | 35.97 | 28.4  | 25.23 |
| 5596 | 73.07 | 56.8  | 35.95 | 28.4  | 25.23 |
| 5598 | 73.04 | 56.79 | 35.96 | 28.41 | 25.25 |
| 5600 | 72.97 | 56.74 | 35.94 | 28.39 | 25.25 |
| 5602 | 72.93 | 56.74 | 35.96 | 28.41 | 25.26 |
| 5604 | 72.88 | 56.72 | 35.97 | 28.43 | 25.26 |
| 5606 | 72.8  | 56.66 | 35.94 | 28.4  | 25.23 |
| 5608 | 72.73 | 56.62 | 35.92 | 28.38 | 25.23 |
| 5610 | 72.65 | 56.58 | 35.9  | 28.36 | 25.21 |
| 5612 | 72.59 | 56.54 | 35.88 | 28.36 | 25.21 |
| 5614 | 72.56 | 56.52 | 35.89 | 28.37 | 25.21 |
| 5616 | 72.49 | 56.49 | 35.88 | 28.35 | 25.2  |
| 5618 | 72.4  | 56.43 | 35.85 | 28.32 | 25.19 |
| 5620 | 72.38 | 56.44 | 35.89 | 28.36 | 25.23 |
| 5622 | 72.34 | 56.43 | 35.89 | 28.36 | 25.25 |
| 5624 | 72.3  | 56.4  | 35.89 | 28.36 | 25.24 |
| 5626 | 72.22 | 56.36 | 35.87 | 28.35 | 25.22 |
| 5628 | 72.12 | 56.28 | 35.82 | 28.31 | 25.19 |
| 5630 | 72.08 | 56.25 | 35.81 | 28.3  | 25.18 |
| 5632 | 72.02 | 56.23 | 35.8  | 28.3  | 25.18 |
| 5634 | 71.99 | 56.24 | 35.84 | 28.34 | 25.21 |
| 5636 | 71.9  | 56.16 | 35.79 | 28.3  | 25.18 |
| 5638 | 71.85 | 56.14 | 35.79 | 28.3  | 25.18 |
| 5640 | 71.78 | 56.1  | 35.79 | 28.3  | 25.18 |
| 5642 | 71.73 | 56.09 | 35.78 | 28.3  | 25.2  |
| 5644 | 71.7  | 56.07 | 35.78 | 28.31 | 25.2  |
| 5646 | 71.63 | 56.04 | 35.78 | 28.3  | 25.18 |



|      |       |       |       |       |       |
|------|-------|-------|-------|-------|-------|
| 5648 | 71.59 | 56.03 | 35.8  | 28.32 | 25.21 |
| 5650 | 71.54 | 56    | 35.79 | 28.32 | 25.21 |
| 5652 | 71.46 | 55.94 | 35.76 | 28.27 | 25.19 |
| 5654 | 71.39 | 55.9  | 35.74 | 28.24 | 25.16 |
| 5656 | 71.33 | 55.89 | 35.75 | 28.27 | 25.18 |
| 5658 | 71.27 | 55.85 | 35.74 | 28.26 | 25.18 |
| 5660 | 71.23 | 55.83 | 35.73 | 28.25 | 25.17 |
| 5662 | 71.12 | 55.76 | 35.68 | 28.22 | 25.14 |
| 5664 | 71.1  | 55.76 | 35.7  | 28.24 | 25.16 |
| 5666 | 71.07 | 55.75 | 35.71 | 28.27 | 25.19 |
| 5668 | 70.97 | 55.67 | 35.67 | 28.21 | 25.13 |
| 5670 | 70.92 | 55.65 | 35.67 | 28.23 | 25.14 |
| 5672 | 70.88 | 55.64 | 35.68 | 28.24 | 25.14 |
| 5674 | 70.82 | 55.6  | 35.68 | 28.22 | 25.14 |
| 5676 | 70.74 | 55.54 | 35.63 | 28.19 | 25.12 |
| 5678 | 70.7  | 55.53 | 35.64 | 28.21 | 25.12 |
| 5680 | 70.67 | 55.52 | 35.66 | 28.21 | 25.14 |
| 5682 | 70.58 | 55.47 | 35.63 | 28.19 | 25.12 |
| 5684 | 70.52 | 55.44 | 35.62 | 28.18 | 25.11 |
| 5686 | 70.45 | 55.39 | 35.6  | 28.16 | 25.1  |
| 5688 | 70.39 | 55.36 | 35.59 | 28.16 | 25.1  |
| 5690 | 70.33 | 55.33 | 35.58 | 28.15 | 25.1  |
| 5692 | 70.29 | 55.31 | 35.58 | 28.15 | 25.11 |
| 5694 | 70.21 | 55.25 | 35.55 | 28.12 | 25.06 |
| 5696 | 70.19 | 55.25 | 35.56 | 28.13 | 25.09 |
| 5698 | 70.13 | 55.21 | 35.56 | 28.14 | 25.09 |
| 5700 | 70.07 | 55.19 | 35.55 | 28.13 | 25.1  |
| 5702 | 70.01 | 55.15 | 35.54 | 28.12 | 25.09 |
| 5704 | 69.97 | 55.14 | 35.55 | 28.14 | 25.1  |
| 5706 | 69.92 | 55.12 | 35.55 | 28.16 | 25.12 |
| 5708 | 69.85 | 55.06 | 35.52 | 28.12 | 25.09 |
| 5710 | 69.84 | 55.07 | 35.56 | 28.16 | 25.13 |
| 5712 | 69.78 | 55.05 | 35.55 | 28.15 | 25.13 |
| 5714 | 69.71 | 55    | 35.52 | 28.13 | 25.09 |
| 5716 | 69.69 | 55    | 35.54 | 28.15 | 25.12 |
| 5718 | 69.63 | 54.98 | 35.53 | 28.15 | 25.12 |
| 5720 | 69.55 | 54.94 | 35.52 | 28.14 | 25.11 |
| 5722 | 69.51 | 54.92 | 35.52 | 28.15 | 25.12 |
| 5724 | 69.46 | 54.89 | 35.51 | 28.14 | 25.12 |
| 5726 | 69.41 | 54.86 | 35.51 | 28.14 | 25.1  |
| 5728 | 69.34 | 54.81 | 35.47 | 28.11 | 25.07 |
| 5730 | 69.25 | 54.76 | 35.45 | 28.09 | 25.05 |
| 5732 | 69.21 | 54.74 | 35.45 | 28.09 | 25.07 |
| 5734 | 69.16 | 54.71 | 35.43 | 28.07 | 25.07 |

|      |       |       |       |       |       |
|------|-------|-------|-------|-------|-------|
| 5736 | 69.11 | 54.69 | 35.44 | 28.08 | 25.08 |
| 5738 | 69.06 | 54.68 | 35.45 | 28.08 | 25.09 |
| 5740 | 68.99 | 54.65 | 35.45 | 28.09 | 25.08 |
| 5742 | 68.95 | 54.62 | 35.43 | 28.08 | 25.08 |
| 5744 | 68.9  | 54.6  | 35.44 | 28.08 | 25.08 |
| 5746 | 68.83 | 54.54 | 35.4  | 28.06 | 25.06 |
| 5748 | 68.81 | 54.55 | 35.43 | 28.09 | 25.08 |
| 5750 | 68.76 | 54.52 | 35.42 | 28.09 | 25.08 |
| 5752 | 68.68 | 54.47 | 35.39 | 28.06 | 25.06 |
| 5754 | 68.64 | 54.46 | 35.41 | 28.08 | 25.08 |
| 5756 | 68.59 | 54.44 | 35.38 | 28.05 | 25.07 |
| 5758 | 68.51 | 54.37 | 35.34 | 28.02 | 25.03 |
| 5760 | 68.48 | 54.37 | 35.38 | 28.05 | 25.07 |
| 5762 | 68.43 | 54.35 | 35.38 | 28.06 | 25.07 |
| 5764 | 68.37 | 54.32 | 35.37 | 28.04 | 25.06 |
| 5766 | 68.31 | 54.28 | 35.36 | 28.03 | 25.07 |
| 5768 | 68.26 | 54.26 | 35.36 | 28.04 | 25.06 |
| 5770 | 68.18 | 54.2  | 35.31 | 28    | 25.03 |
| 5772 | 68.11 | 54.17 | 35.3  | 27.99 | 25.01 |
| 5774 | 68.1  | 54.16 | 35.32 | 28.02 | 25.05 |
| 5776 | 68.04 | 54.13 | 35.3  | 27.99 | 25.03 |
| 5778 | 67.95 | 54.08 | 35.27 | 27.97 | 25    |
| 5780 | 67.91 | 54.06 | 35.27 | 27.98 | 25.01 |
| 5782 | 67.84 | 54.01 | 35.25 | 27.96 | 24.99 |
| 5784 | 67.84 | 54.04 | 35.29 | 28.01 | 25.04 |
| 5786 | 67.78 | 54    | 35.28 | 28    | 25.04 |
| 5788 | 67.75 | 53.99 | 35.28 | 28    | 25.03 |
| 5790 | 67.7  | 53.96 | 35.28 | 28    | 25.04 |
| 5792 | 67.64 | 53.94 | 35.27 | 28    | 25.04 |
| 5794 | 67.57 | 53.89 | 35.26 | 27.97 | 25.02 |
| 5796 | 67.53 | 53.87 | 35.26 | 27.98 | 25.03 |
| 5798 | 67.42 | 53.8  | 35.21 | 27.93 | 24.99 |
| 5800 | 67.38 | 53.78 | 35.21 | 27.93 | 25    |
| 5802 | 67.36 | 53.78 | 35.23 | 27.96 | 25.02 |
| 5804 | 67.27 | 53.73 | 35.19 | 27.93 | 24.99 |
| 5806 | 67.21 | 53.68 | 35.16 | 27.91 | 24.98 |
| 5808 | 67.16 | 53.66 | 35.17 | 27.92 | 24.99 |
| 5810 | 67.15 | 53.66 | 35.2  | 27.95 | 25.01 |
| 5812 | 67.07 | 53.61 | 35.18 | 27.92 | 25    |
| 5814 | 67.05 | 53.61 | 35.18 | 27.95 | 25.01 |
| 5816 | 66.99 | 53.59 | 35.19 | 27.94 | 25.02 |
| 5818 | 66.94 | 53.55 | 35.16 | 27.93 | 25.01 |
| 5820 | 66.89 | 53.52 | 35.15 | 27.92 | 24.97 |
| 5822 | 66.86 | 53.51 | 35.18 | 27.94 | 25    |

|      |       |       |       |       |       |
|------|-------|-------|-------|-------|-------|
| 5824 | 66.81 | 53.49 | 35.16 | 27.93 | 25    |
| 5826 | 66.74 | 53.46 | 35.15 | 27.92 | 25.01 |
| 5828 | 66.69 | 53.42 | 35.15 | 27.92 | 25.01 |
| 5830 | 66.62 | 53.37 | 35.12 | 27.88 | 24.98 |
| 5832 | 66.58 | 53.35 | 35.11 | 27.88 | 24.98 |
| 5834 | 66.52 | 53.32 | 35.11 | 27.89 | 24.98 |
| 5836 | 66.49 | 53.31 | 35.11 | 27.9  | 24.99 |
| 5838 | 66.43 | 53.27 | 35.09 | 27.87 | 24.97 |
| 5840 | 66.37 | 53.24 | 35.08 | 27.87 | 24.98 |
| 5842 | 66.29 | 53.17 | 35.04 | 27.83 | 24.95 |
| 5844 | 66.29 | 53.19 | 35.08 | 27.87 | 24.98 |
| 5846 | 66.24 | 53.17 | 35.08 | 27.88 | 24.98 |
| 5848 | 66.17 | 53.12 | 35.05 | 27.85 | 24.95 |
| 5850 | 66.11 | 53.09 | 35.04 | 27.84 | 24.94 |
| 5852 | 66.09 | 53.1  | 35.06 | 27.88 | 24.98 |
| 5854 | 66.02 | 53.05 | 35.04 | 27.86 | 24.96 |
| 5856 | 65.95 | 53    | 35.01 | 27.83 | 24.94 |
| 5858 | 65.92 | 52.99 | 35.02 | 27.83 | 24.95 |
| 5860 | 65.89 | 52.98 | 35.03 | 27.85 | 24.97 |
| 5862 | 65.85 | 52.96 | 35.03 | 27.85 | 24.97 |
| 5864 | 65.79 | 52.93 | 35.02 | 27.85 | 24.96 |
| 5866 | 65.73 | 52.9  | 35.01 | 27.84 | 24.96 |
| 5868 | 65.68 | 52.86 | 35    | 27.82 | 24.96 |
| 5870 | 65.61 | 52.82 | 34.98 | 27.81 | 24.95 |
| 5872 | 65.58 | 52.81 | 34.98 | 27.82 | 24.95 |
| 5874 | 65.52 | 52.79 | 34.98 | 27.82 | 24.95 |
| 5876 | 65.45 | 52.72 | 34.94 | 27.79 | 24.93 |
| 5878 | 65.42 | 52.72 | 34.95 | 27.8  | 24.93 |
| 5880 | 65.38 | 52.71 | 34.96 | 27.81 | 24.95 |
| 5882 | 65.32 | 52.67 | 34.94 | 27.79 | 24.93 |
| 5884 | 65.28 | 52.65 | 34.93 | 27.8  | 24.94 |
| 5886 | 65.24 | 52.62 | 34.94 | 27.81 | 24.94 |
| 5888 | 65.19 | 52.6  | 34.93 | 27.8  | 24.94 |
| 5890 | 65.13 | 52.58 | 34.92 | 27.8  | 24.94 |
| 5892 | 65.08 | 52.55 | 34.92 | 27.79 | 24.93 |
| 5894 | 65.05 | 52.53 | 34.92 | 27.81 | 24.94 |
| 5896 | 65.01 | 52.53 | 34.94 | 27.81 | 24.95 |
| 5898 | 64.93 | 52.46 | 34.89 | 27.78 | 24.93 |
| 5900 | 64.87 | 52.42 | 34.89 | 27.76 | 24.93 |
| 5902 | 64.82 | 52.4  | 34.89 | 27.76 | 24.93 |
| 5904 | 64.77 | 52.37 | 34.87 | 27.75 | 24.92 |
| 5906 | 64.73 | 52.35 | 34.87 | 27.75 | 24.92 |
| 5908 | 64.69 | 52.32 | 34.86 | 27.75 | 24.93 |
| 5910 | 64.64 | 52.3  | 34.85 | 27.74 | 24.91 |

|      |       |       |       |       |       |
|------|-------|-------|-------|-------|-------|
| 5912 | 64.59 | 52.27 | 34.85 | 27.74 | 24.91 |
| 5914 | 64.53 | 52.24 | 34.84 | 27.74 | 24.91 |
| 5916 | 64.49 | 52.22 | 34.84 | 27.74 | 24.91 |
| 5918 | 64.44 | 52.19 | 34.82 | 27.72 | 24.89 |
| 5920 | 64.41 | 52.17 | 34.83 | 27.74 | 24.9  |
| 5922 | 64.34 | 52.13 | 34.81 | 27.73 | 24.89 |
| 5924 | 64.3  | 52.12 | 34.81 | 27.73 | 24.9  |
| 5926 | 64.26 | 52.1  | 34.8  | 27.72 | 24.9  |
| 5928 | 64.2  | 52.05 | 34.78 | 27.7  | 24.89 |
| 5930 | 64.14 | 52.02 | 34.76 | 27.69 | 24.88 |
| 5932 | 64.1  | 52    | 34.76 | 27.69 | 24.88 |
| 5934 | 64.04 | 51.97 | 34.76 | 27.69 | 24.89 |
| 5936 | 64.01 | 51.95 | 34.77 | 27.69 | 24.89 |
| 5938 | 63.98 | 51.94 | 34.79 | 27.7  | 24.9  |
| 5940 | 63.92 | 51.9  | 34.76 | 27.68 | 24.89 |
| 5942 | 63.88 | 51.88 | 34.75 | 27.69 | 24.9  |
| 5944 | 63.84 | 51.87 | 34.76 | 27.7  | 24.92 |
| 5946 | 63.8  | 51.85 | 34.76 | 27.7  | 24.92 |
| 5948 | 63.79 | 51.86 | 34.78 | 27.73 | 24.94 |
| 5950 | 63.74 | 51.84 | 34.76 | 27.72 | 24.92 |
| 5952 | 63.65 | 51.76 | 34.72 | 27.68 | 24.88 |
| 5954 | 63.59 | 51.73 | 34.71 | 27.67 | 24.88 |
| 5956 | 63.52 | 51.69 | 34.68 | 27.64 | 24.86 |
| 5958 | 63.5  | 51.68 | 34.69 | 27.66 | 24.87 |
| 5960 | 63.45 | 51.66 | 34.69 | 27.67 | 24.86 |
| 5962 | 63.35 | 51.59 | 34.65 | 27.6  | 24.82 |
| 5964 | 63.34 | 51.6  | 34.66 | 27.64 | 24.87 |
| 5966 | 63.3  | 51.57 | 34.66 | 27.64 | 24.87 |
| 5968 | 63.21 | 51.51 | 34.63 | 27.62 | 24.85 |
| 5970 | 63.17 | 51.5  | 34.62 | 27.61 | 24.84 |
| 5972 | 63.16 | 51.5  | 34.64 | 27.63 | 24.86 |
| 5974 | 63.09 | 51.45 | 34.62 | 27.61 | 24.85 |
| 5976 | 63.05 | 51.43 | 34.62 | 27.6  | 24.84 |
| 5978 | 63.01 | 51.41 | 34.62 | 27.62 | 24.85 |
| 5980 | 62.96 | 51.39 | 34.61 | 27.61 | 24.84 |
| 5982 | 62.91 | 51.36 | 34.59 | 27.6  | 24.83 |
| 5984 | 62.88 | 51.34 | 34.6  | 27.59 | 24.82 |
| 5986 | 62.83 | 51.32 | 34.6  | 27.61 | 24.84 |
| 5988 | 62.82 | 51.33 | 34.62 | 27.62 | 24.87 |
| 5990 | 62.76 | 51.27 | 34.58 | 27.6  | 24.84 |
| 5992 | 62.71 | 51.26 | 34.58 | 27.6  | 24.84 |
| 5994 | 62.64 | 51.21 | 34.56 | 27.57 | 24.83 |
| 5996 | 62.55 | 51.15 | 34.52 | 27.54 | 24.79 |
| 5998 | 62.5  | 51.11 | 34.5  | 27.51 | 24.77 |

|      |       |       |       |       |       |
|------|-------|-------|-------|-------|-------|
| 6000 | 62.48 | 51.11 | 34.51 | 27.52 | 24.79 |
| 6002 | 62.44 | 51.07 | 34.5  | 27.52 | 24.78 |
| 6004 | 62.4  | 51.07 | 34.51 | 27.53 | 24.81 |
| 6006 | 62.39 | 51.07 | 34.53 | 27.54 | 24.82 |
| 6008 | 62.3  | 51.02 | 34.49 | 27.53 | 24.8  |
| 6010 | 62.3  | 51.02 | 34.52 | 27.55 | 24.82 |
| 6012 | 62.26 | 51.01 | 34.52 | 27.57 | 24.85 |
| 6014 | 62.21 | 50.98 | 34.51 | 27.56 | 24.82 |
| 6016 | 62.15 | 50.93 | 34.48 | 27.55 | 24.81 |
| 6018 | 62.12 | 50.93 | 34.49 | 27.55 | 24.81 |
| 6020 | 62.08 | 50.9  | 34.49 | 27.55 | 24.82 |
| 6022 | 62.04 | 50.88 | 34.48 | 27.54 | 24.81 |
| 6024 | 61.99 | 50.86 | 34.48 | 27.54 | 24.81 |
| 6026 | 61.94 | 50.83 | 34.47 | 27.54 | 24.82 |
| 6028 | 61.89 | 50.8  | 34.46 | 27.53 | 24.81 |
| 6030 | 61.83 | 50.75 | 34.43 | 27.5  | 24.8  |
| 6032 | 61.76 | 50.71 | 34.41 | 27.48 | 24.78 |
| 6034 | 61.75 | 50.72 | 34.43 | 27.5  | 24.8  |
| 6036 | 61.7  | 50.7  | 34.43 | 27.5  | 24.8  |
| 6038 | 61.65 | 50.66 | 34.4  | 27.49 | 24.78 |
| 6040 | 61.58 | 50.62 | 34.39 | 27.47 | 24.78 |
| 6042 | 61.57 | 50.61 | 34.4  | 27.49 | 24.79 |
| 6044 | 61.51 | 50.58 | 34.39 | 27.48 | 24.8  |
| 6046 | 61.44 | 50.53 | 34.36 | 27.45 | 24.74 |
| 6048 | 61.41 | 50.52 | 34.36 | 27.47 | 24.77 |
| 6050 | 61.35 | 50.49 | 34.35 | 27.46 | 24.76 |
| 6052 | 61.3  | 50.45 | 34.33 | 27.45 | 24.75 |
| 6054 | 61.29 | 50.47 | 34.36 | 27.47 | 24.77 |
| 6056 | 61.27 | 50.46 | 34.37 | 27.48 | 24.78 |
| 6058 | 61.21 | 50.42 | 34.35 | 27.46 | 24.75 |
| 6060 | 61.15 | 50.38 | 34.33 | 27.44 | 24.74 |
| 6062 | 61.13 | 50.38 | 34.34 | 27.46 | 24.78 |
| 6064 | 61.08 | 50.35 | 34.33 | 27.45 | 24.78 |
| 6066 | 61    | 50.31 | 34.31 | 27.43 | 24.76 |
| 6068 | 60.97 | 50.28 | 34.31 | 27.42 | 24.74 |
| 6070 | 60.91 | 50.23 | 34.28 | 27.4  | 24.72 |
| 6072 | 60.85 | 50.2  | 34.26 | 27.39 | 24.72 |
| 6074 | 60.85 | 50.22 | 34.3  | 27.43 | 24.76 |
| 6076 | 60.81 | 50.2  | 34.28 | 27.43 | 24.77 |
| 6078 | 60.78 | 50.17 | 34.28 | 27.43 | 24.76 |
| 6080 | 60.71 | 50.13 | 34.26 | 27.4  | 24.74 |
| 6082 | 60.62 | 50.06 | 34.22 | 27.37 | 24.7  |
| 6084 | 60.6  | 50.06 | 34.23 | 27.37 | 24.7  |
| 6086 | 60.6  | 50.05 | 34.24 | 27.4  | 24.72 |

|      |       |       |       |       |       |
|------|-------|-------|-------|-------|-------|
| 6088 | 60.52 | 50.01 | 34.21 | 27.37 | 24.71 |
| 6090 | 60.49 | 50.01 | 34.22 | 27.38 | 24.71 |
| 6092 | 60.46 | 49.97 | 34.21 | 27.38 | 24.73 |
| 6094 | 60.39 | 49.92 | 34.17 | 27.35 | 24.68 |
| 6096 | 60.33 | 49.9  | 34.17 | 27.34 | 24.67 |
| 6098 | 60.29 | 49.87 | 34.16 | 27.34 | 24.67 |
| 6100 | 60.27 | 49.86 | 34.17 | 27.35 | 24.68 |
| 6102 | 60.22 | 49.84 | 34.16 | 27.35 | 24.69 |
| 6104 | 60.18 | 49.8  | 34.14 | 27.33 | 24.68 |
| 6106 | 60.12 | 49.77 | 34.12 | 27.31 | 24.67 |
| 6108 | 60.07 | 49.76 | 34.13 | 27.32 | 24.68 |
| 6110 | 60.06 | 49.76 | 34.15 | 27.34 | 24.68 |
| 6112 | 60.01 | 49.72 | 34.14 | 27.34 | 24.69 |
| 6114 | 59.95 | 49.69 | 34.11 | 27.31 | 24.67 |
| 6116 | 59.92 | 49.66 | 34.12 | 27.32 | 24.68 |
| 6118 | 59.87 | 49.63 | 34.09 | 27.3  | 24.66 |
| 6120 | 59.83 | 49.61 | 34.09 | 27.29 | 24.65 |
| 6122 | 59.79 | 49.59 | 34.09 | 27.29 | 24.65 |
| 6124 | 59.76 | 49.57 | 34.08 | 27.31 | 24.66 |
| 6126 | 59.69 | 49.52 | 34.05 | 27.28 | 24.64 |
| 6128 | 59.66 | 49.51 | 34.06 | 27.29 | 24.64 |
| 6130 | 59.62 | 49.49 | 34.05 | 27.28 | 24.65 |
| 6132 | 59.58 | 49.47 | 34.05 | 27.28 | 24.65 |
| 6134 | 59.54 | 49.45 | 34.04 | 27.28 | 24.65 |
| 6136 | 59.49 | 49.42 | 34.05 | 27.28 | 24.65 |
| 6138 | 59.44 | 49.39 | 34.02 | 27.27 | 24.63 |
| 6140 | 59.41 | 49.37 | 34.03 | 27.27 | 24.66 |
| 6142 | 59.37 | 49.36 | 34.03 | 27.27 | 24.65 |
| 6144 | 59.34 | 49.35 | 34.04 | 27.28 | 24.66 |
| 6146 | 59.31 | 49.33 | 34.04 | 27.3  | 24.68 |
| 6148 | 59.25 | 49.28 | 34.01 | 27.25 | 24.64 |
| 6150 | 59.22 | 49.26 | 34    | 27.25 | 24.65 |
| 6152 | 59.18 | 49.26 | 34.02 | 27.27 | 24.64 |
| 6154 | 59.13 | 49.23 | 34.01 | 27.27 | 24.64 |
| 6156 | 59.1  | 49.21 | 34    | 27.27 | 24.64 |
| 6158 | 59.05 | 49.18 | 33.97 | 27.25 | 24.62 |
| 6160 | 58.98 | 49.14 | 33.96 | 27.23 | 24.62 |
| 6162 | 58.95 | 49.12 | 33.95 | 27.23 | 24.62 |
| 6164 | 58.9  | 49.08 | 33.93 | 27.21 | 24.59 |
| 6166 | 58.89 | 49.09 | 33.96 | 27.24 | 24.62 |
| 6168 | 58.84 | 49.05 | 33.94 | 27.22 | 24.61 |
| 6170 | 58.81 | 49.04 | 33.94 | 27.23 | 24.63 |
| 6172 | 58.74 | 48.99 | 33.92 | 27.2  | 24.6  |
| 6174 | 58.71 | 48.98 | 33.92 | 27.21 | 24.62 |

|      |       |       |       |       |       |
|------|-------|-------|-------|-------|-------|
| 6176 | 58.67 | 48.97 | 33.92 | 27.21 | 24.61 |
| 6178 | 58.62 | 48.93 | 33.9  | 27.19 | 24.61 |
| 6180 | 58.58 | 48.91 | 33.89 | 27.19 | 24.6  |
| 6182 | 58.52 | 48.88 | 33.88 | 27.17 | 24.58 |
| 6184 | 58.5  | 48.87 | 33.89 | 27.19 | 24.6  |
| 6186 | 58.46 | 48.85 | 33.89 | 27.19 | 24.6  |
| 6188 | 58.4  | 48.8  | 33.85 | 27.17 | 24.56 |
| 6190 | 58.38 | 48.8  | 33.86 | 27.19 | 24.58 |
| 6192 | 58.33 | 48.76 | 33.85 | 27.16 | 24.58 |
| 6194 | 58.3  | 48.75 | 33.86 | 27.18 | 24.59 |
| 6196 | 58.26 | 48.73 | 33.84 | 27.17 | 24.59 |
| 6198 | 58.23 | 48.71 | 33.85 | 27.18 | 24.58 |
| 6200 | 58.18 | 48.69 | 33.84 | 27.17 | 24.58 |
| 6202 | 58.13 | 48.64 | 33.81 | 27.14 | 24.55 |
| 6204 | 58.1  | 48.63 | 33.81 | 27.14 | 24.58 |
| 6206 | 58.02 | 48.58 | 33.77 | 27.12 | 24.55 |
| 6208 | 58.01 | 48.58 | 33.79 | 27.13 | 24.56 |
| 6210 | 57.97 | 48.56 | 33.8  | 27.14 | 24.58 |
| 6212 | 57.88 | 48.5  | 33.77 | 27.11 | 24.54 |
| 6214 | 57.87 | 48.49 | 33.76 | 27.1  | 24.55 |
| 6216 | 57.83 | 48.47 | 33.76 | 27.1  | 24.55 |
| 6218 | 57.83 | 48.48 | 33.78 | 27.13 | 24.57 |
| 6220 | 57.77 | 48.44 | 33.75 | 27.12 | 24.56 |
| 6222 | 57.75 | 48.43 | 33.76 | 27.12 | 24.56 |
| 6224 | 57.73 | 48.41 | 33.76 | 27.13 | 24.56 |
| 6226 | 57.64 | 48.37 | 33.72 | 27.09 | 24.53 |
| 6228 | 57.61 | 48.36 | 33.73 | 27.11 | 24.54 |
| 6230 | 57.58 | 48.33 | 33.72 | 27.1  | 24.52 |
| 6232 | 57.56 | 48.32 | 33.73 | 27.11 | 24.54 |
| 6234 | 57.52 | 48.3  | 33.72 | 27.11 | 24.56 |
| 6236 | 57.48 | 48.28 | 33.72 | 27.1  | 24.55 |
| 6238 | 57.43 | 48.24 | 33.69 | 27.09 | 24.54 |
| 6240 | 57.38 | 48.21 | 33.68 | 27.08 | 24.54 |
| 6242 | 57.36 | 48.21 | 33.7  | 27.09 | 24.55 |
| 6244 | 57.31 | 48.17 | 33.68 | 27.07 | 24.54 |
| 6246 | 57.27 | 48.15 | 33.67 | 27.05 | 24.53 |
| 6248 | 57.21 | 48.09 | 33.65 | 27.05 | 24.51 |
| 6250 | 57.18 | 48.09 | 33.64 | 27.05 | 24.53 |
| 6252 | 57.17 | 48.1  | 33.66 | 27.07 | 24.53 |
| 6254 | 57.14 | 48.08 | 33.66 | 27.08 | 24.53 |
| 6256 | 57.11 | 48.07 | 33.66 | 27.08 | 24.53 |
| 6258 | 57.07 | 48.04 | 33.65 | 27.07 | 24.53 |
| 6260 | 57.03 | 48.02 | 33.64 | 27.07 | 24.53 |
| 6262 | 56.99 | 48    | 33.64 | 27.07 | 24.53 |

|      |       |       |       |       |       |
|------|-------|-------|-------|-------|-------|
| 6264 | 56.96 | 47.98 | 33.63 | 27.07 | 24.53 |
| 6266 | 56.89 | 47.94 | 33.61 | 27.05 | 24.49 |
| 6268 | 56.86 | 47.93 | 33.61 | 27.06 | 24.51 |
| 6270 | 56.84 | 47.9  | 33.61 | 27.05 | 24.53 |
| 6272 | 56.79 | 47.88 | 33.6  | 27.04 | 24.52 |
| 6274 | 56.75 | 47.85 | 33.59 | 27.03 | 24.52 |
| 6276 | 56.72 | 47.85 | 33.6  | 27.04 | 24.52 |
| 6278 | 56.67 | 47.81 | 33.58 | 27.02 | 24.51 |
| 6280 | 56.64 | 47.79 | 33.58 | 27.02 | 24.52 |
| 6282 | 56.57 | 47.75 | 33.55 | 27.01 | 24.5  |
| 6284 | 56.56 | 47.75 | 33.56 | 27.01 | 24.5  |
| 6286 | 56.52 | 47.73 | 33.55 | 27.01 | 24.5  |
| 6288 | 56.48 | 47.71 | 33.55 | 27.02 | 24.5  |
| 6290 | 56.46 | 47.69 | 33.55 | 27.02 | 24.5  |
| 6292 | 56.41 | 47.67 | 33.54 | 27    | 24.49 |
| 6294 | 56.37 | 47.64 | 33.53 | 26.99 | 24.48 |
| 6296 | 56.33 | 47.63 | 33.52 | 27.01 | 24.49 |
| 6298 | 56.29 | 47.6  | 33.51 | 26.98 | 24.47 |
| 6300 | 56.28 | 47.6  | 33.52 | 27    | 24.5  |
| 6302 | 56.22 | 47.55 | 33.5  | 26.97 | 24.48 |
| 6304 | 56.22 | 47.59 | 33.54 | 27.03 | 24.53 |
| 6306 | 56.15 | 47.54 | 33.51 | 26.99 | 24.49 |
| 6308 | 56.11 | 47.51 | 33.49 | 26.99 | 24.49 |
| 6310 | 56.06 | 47.48 | 33.48 | 26.97 | 24.49 |
| 6312 | 56.03 | 47.45 | 33.47 | 26.96 | 24.49 |
| 6314 | 56    | 47.45 | 33.48 | 26.97 | 24.48 |
| 6316 | 55.97 | 47.42 | 33.48 | 26.97 | 24.49 |
| 6318 | 55.93 | 47.4  | 33.47 | 26.97 | 24.48 |
| 6320 | 55.9  | 47.38 | 33.46 | 26.97 | 24.48 |
| 6322 | 55.85 | 47.36 | 33.45 | 26.97 | 24.48 |
| 6324 | 55.82 | 47.34 | 33.45 | 26.96 | 24.47 |
| 6326 | 55.78 | 47.32 | 33.44 | 26.96 | 24.47 |
| 6328 | 55.75 | 47.3  | 33.43 | 26.96 | 24.47 |
| 6330 | 55.72 | 47.3  | 33.44 | 26.97 | 24.48 |
| 6332 | 55.69 | 47.27 | 33.43 | 26.96 | 24.48 |
| 6334 | 55.63 | 47.24 | 33.41 | 26.95 | 24.47 |
| 6336 | 55.59 | 47.22 | 33.41 | 26.95 | 24.46 |
| 6338 | 55.55 | 47.2  | 33.4  | 26.94 | 24.45 |
| 6340 | 55.53 | 47.18 | 33.4  | 26.94 | 24.46 |
| 6342 | 55.48 | 47.15 | 33.38 | 26.92 | 24.45 |
| 6344 | 55.45 | 47.13 | 33.39 | 26.93 | 24.46 |
| 6346 | 55.42 | 47.14 | 33.4  | 26.95 | 24.47 |
| 6348 | 55.37 | 47.1  | 33.37 | 26.93 | 24.46 |
| 6350 | 55.39 | 47.12 | 33.41 | 26.98 | 24.51 |



|      |       |       |       |       |       |
|------|-------|-------|-------|-------|-------|
| 6352 | 55.35 | 47.09 | 33.39 | 26.96 | 24.49 |
| 6354 | 55.29 | 47.06 | 33.38 | 26.94 | 24.48 |
| 6356 | 55.25 | 47.04 | 33.36 | 26.93 | 24.47 |
| 6358 | 55.19 | 47    | 33.35 | 26.91 | 24.46 |
| 6360 | 55.18 | 47    | 33.37 | 26.92 | 24.49 |
| 6362 | 55.15 | 46.99 | 33.38 | 26.95 | 24.51 |
| 6364 | 55.12 | 46.97 | 33.36 | 26.93 | 24.49 |
| 6366 | 55.1  | 46.97 | 33.37 | 26.95 | 24.51 |
| 6368 | 55.05 | 46.94 | 33.34 | 26.93 | 24.48 |
| 6370 | 55.02 | 46.92 | 33.35 | 26.94 | 24.5  |
| 6372 | 54.99 | 46.91 | 33.35 | 26.94 | 24.5  |
| 6374 | 54.96 | 46.89 | 33.35 | 26.94 | 24.5  |
| 6376 | 54.89 | 46.83 | 33.31 | 26.9  | 24.47 |
| 6378 | 54.89 | 46.84 | 33.33 | 26.93 | 24.48 |
| 6380 | 54.84 | 46.83 | 33.33 | 26.93 | 24.49 |
| 6382 | 54.8  | 46.79 | 33.31 | 26.92 | 24.49 |
| 6384 | 54.78 | 46.78 | 33.31 | 26.92 | 24.48 |
| 6386 | 54.71 | 46.75 | 33.29 | 26.9  | 24.47 |
| 6388 | 54.69 | 46.72 | 33.28 | 26.9  | 24.47 |
| 6390 | 54.62 | 46.66 | 33.24 | 26.86 | 24.43 |
| 6392 | 54.57 | 46.63 | 33.22 | 26.85 | 24.4  |
| 6394 | 54.55 | 46.62 | 33.23 | 26.86 | 24.42 |
| 6396 | 54.5  | 46.59 | 33.21 | 26.84 | 24.41 |
| 6398 | 54.49 | 46.58 | 33.22 | 26.84 | 24.42 |
| 6400 | 54.44 | 46.56 | 33.21 | 26.84 | 24.42 |
| 6402 | 54.42 | 46.56 | 33.23 | 26.86 | 24.45 |
| 6404 | 54.37 | 46.52 | 33.2  | 26.83 | 24.43 |
| 6406 | 54.34 | 46.5  | 33.19 | 26.83 | 24.43 |
| 6408 | 54.3  | 46.48 | 33.19 | 26.82 | 24.42 |
| 6410 | 54.27 | 46.46 | 33.18 | 26.82 | 24.42 |
| 6412 | 54.24 | 46.44 | 33.18 | 26.82 | 24.42 |
| 6414 | 54.21 | 46.42 | 33.17 | 26.82 | 24.41 |
| 6416 | 54.17 | 46.39 | 33.16 | 26.81 | 24.41 |
| 6418 | 54.11 | 46.36 | 33.15 | 26.79 | 24.38 |
| 6420 | 54.1  | 46.36 | 33.15 | 26.81 | 24.4  |
| 6422 | 54.08 | 46.34 | 33.15 | 26.81 | 24.41 |
| 6424 | 54.05 | 46.32 | 33.15 | 26.81 | 24.41 |
| 6426 | 54    | 46.3  | 33.14 | 26.81 | 24.4  |
| 6428 | 53.97 | 46.28 | 33.13 | 26.81 | 24.4  |
| 6430 | 53.95 | 46.26 | 33.12 | 26.8  | 24.4  |
| 6432 | 53.94 | 46.27 | 33.15 | 26.83 | 24.42 |
| 6434 | 53.9  | 46.25 | 33.14 | 26.81 | 24.41 |
| 6436 | 53.84 | 46.21 | 33.13 | 26.8  | 24.41 |
| 6438 | 53.78 | 46.17 | 33.1  | 26.78 | 24.39 |

|      |       |       |       |       |       |
|------|-------|-------|-------|-------|-------|
| 6440 | 53.77 | 46.17 | 33.11 | 26.78 | 24.41 |
| 6442 | 53.73 | 46.14 | 33.09 | 26.78 | 24.39 |
| 6444 | 53.69 | 46.12 | 33.09 | 26.77 | 24.39 |
| 6446 | 53.67 | 46.11 | 33.09 | 26.79 | 24.4  |
| 6448 | 53.63 | 46.07 | 33.07 | 26.77 | 24.4  |
| 6450 | 53.6  | 46.07 | 33.08 | 26.78 | 24.41 |
| 6452 | 53.56 | 46.03 | 33.06 | 26.76 | 24.38 |
| 6454 | 53.53 | 46.02 | 33.05 | 26.77 | 24.38 |
| 6456 | 53.51 | 46.03 | 33.08 | 26.78 | 24.38 |
| 6458 | 53.51 | 46.04 | 33.1  | 26.81 | 24.43 |
| 6460 | 53.44 | 45.97 | 33.05 | 26.77 | 24.39 |
| 6462 | 53.4  | 45.96 | 33.05 | 26.79 | 24.4  |
| 6464 | 53.37 | 45.93 | 33.03 | 26.76 | 24.39 |
| 6466 | 53.32 | 45.91 | 33.02 | 26.74 | 24.38 |
| 6468 | 53.3  | 45.9  | 33.01 | 26.74 | 24.37 |
| 6470 | 53.25 | 45.86 | 33    | 26.73 | 24.37 |
| 6472 | 53.23 | 45.87 | 33.03 | 26.74 | 24.39 |
| 6474 | 53.2  | 45.83 | 33    | 26.72 | 24.38 |
| 6476 | 53.14 | 45.79 | 32.98 | 26.72 | 24.36 |
| 6478 | 53.11 | 45.78 | 32.98 | 26.72 | 24.36 |
| 6480 | 53.08 | 45.76 | 32.96 | 26.71 | 24.36 |
| 6482 | 53.02 | 45.72 | 32.95 | 26.7  | 24.34 |
| 6484 | 52.97 | 45.66 | 32.9  | 26.66 | 24.31 |
| 6486 | 52.96 | 45.68 | 32.92 | 26.69 | 24.32 |
| 6488 | 52.89 | 45.62 | 32.9  | 26.65 | 24.29 |
| 6490 | 52.85 | 45.6  | 32.89 | 26.64 | 24.29 |
| 6492 | 52.85 | 45.62 | 32.91 | 26.68 | 24.31 |
| 6494 | 52.81 | 45.58 | 32.9  | 26.66 | 24.31 |
| 6496 | 52.79 | 45.59 | 32.91 | 26.68 | 24.33 |
| 6498 | 52.77 | 45.57 | 32.92 | 26.69 | 24.33 |
| 6500 | 52.75 | 45.56 | 32.9  | 26.67 | 24.31 |
| 6502 | 52.72 | 45.55 | 32.91 | 26.68 | 24.33 |
| 6504 | 52.72 | 45.56 | 32.93 | 26.7  | 24.35 |
| 6506 | 52.66 | 45.52 | 32.9  | 26.69 | 24.34 |
| 6508 | 52.63 | 45.5  | 32.89 | 26.68 | 24.33 |
| 6510 | 52.59 | 45.48 | 32.89 | 26.68 | 24.33 |
| 6512 | 52.55 | 45.44 | 32.87 | 26.66 | 24.32 |
| 6514 | 52.52 | 45.43 | 32.86 | 26.65 | 24.31 |
| 6516 | 52.47 | 45.39 | 32.84 | 26.65 | 24.32 |
| 6518 | 52.41 | 45.35 | 32.82 | 26.61 | 24.28 |
| 6520 | 52.41 | 45.37 | 32.85 | 26.64 | 24.31 |
| 6522 | 52.38 | 45.35 | 32.84 | 26.64 | 24.3  |
| 6524 | 52.34 | 45.32 | 32.82 | 26.63 | 24.3  |
| 6526 | 52.33 | 45.31 | 32.83 | 26.64 | 24.32 |

|      |       |       |       |       |       |
|------|-------|-------|-------|-------|-------|
| 6528 | 52.28 | 45.29 | 32.82 | 26.63 | 24.31 |
| 6530 | 52.23 | 45.24 | 32.79 | 26.6  | 24.27 |
| 6532 | 52.22 | 45.26 | 32.82 | 26.64 | 24.32 |
| 6534 | 52.2  | 45.25 | 32.82 | 26.63 | 24.32 |
| 6536 | 52.16 | 45.22 | 32.81 | 26.62 | 24.32 |
| 6538 | 52.12 | 45.2  | 32.8  | 26.62 | 24.32 |
| 6540 | 52.06 | 45.16 | 32.76 | 26.58 | 24.29 |
| 6542 | 52.07 | 45.17 | 32.8  | 26.62 | 24.31 |
| 6544 | 52.02 | 45.14 | 32.79 | 26.62 | 24.3  |
| 6546 | 51.99 | 45.12 | 32.78 | 26.61 | 24.28 |
| 6548 | 51.95 | 45.1  | 32.76 | 26.6  | 24.27 |
| 6550 | 51.95 | 45.1  | 32.78 | 26.62 | 24.3  |
| 6552 | 51.92 | 45.08 | 32.77 | 26.62 | 24.31 |
| 6554 | 51.85 | 45.03 | 32.74 | 26.57 | 24.28 |
| 6556 | 51.85 | 45.04 | 32.75 | 26.61 | 24.29 |
| 6558 | 51.83 | 45.03 | 32.76 | 26.62 | 24.3  |
| 6560 | 51.8  | 45.01 | 32.76 | 26.62 | 24.3  |
| 6562 | 51.75 | 44.98 | 32.73 | 26.59 | 24.28 |
| 6564 | 51.73 | 44.97 | 32.73 | 26.6  | 24.3  |
| 6566 | 51.7  | 44.95 | 32.73 | 26.59 | 24.3  |
| 6568 | 51.67 | 44.93 | 32.72 | 26.59 | 24.3  |
| 6570 | 51.63 | 44.91 | 32.72 | 26.58 | 24.29 |
| 6572 | 51.6  | 44.89 | 32.71 | 26.58 | 24.31 |
| 6574 | 51.56 | 44.87 | 32.71 | 26.57 | 24.29 |
| 6576 | 51.54 | 44.86 | 32.71 | 26.57 | 24.3  |
| 6578 | 51.51 | 44.84 | 32.7  | 26.58 | 24.3  |
| 6580 | 51.48 | 44.83 | 32.7  | 26.58 | 24.29 |
| 6582 | 51.45 | 44.81 | 32.69 | 26.58 | 24.29 |
| 6584 | 51.42 | 44.8  | 32.69 | 26.58 | 24.28 |
| 6586 | 51.39 | 44.77 | 32.68 | 26.57 | 24.28 |
| 6588 | 51.33 | 44.73 | 32.64 | 26.54 | 24.25 |
| 6590 | 51.33 | 44.73 | 32.67 | 26.57 | 24.28 |
| 6592 | 51.29 | 44.72 | 32.67 | 26.57 | 24.28 |
| 6594 | 51.26 | 44.68 | 32.64 | 26.54 | 24.26 |
| 6596 | 51.25 | 44.69 | 32.65 | 26.57 | 24.28 |
| 6598 | 51.21 | 44.67 | 32.65 | 26.57 | 24.28 |
| 6600 | 51.18 | 44.65 | 32.65 | 26.56 | 24.28 |
| 6602 | 51.15 | 44.63 | 32.64 | 26.56 | 24.28 |
| 6604 | 51.14 | 44.64 | 32.66 | 26.58 | 24.3  |
| 6606 | 51.11 | 44.62 | 32.65 | 26.57 | 24.31 |
| 6608 | 51.08 | 44.6  | 32.65 | 26.57 | 24.32 |
| 6610 | 51.04 | 44.56 | 32.62 | 26.54 | 24.28 |
| 6612 | 51.01 | 44.55 | 32.62 | 26.55 | 24.3  |
| 6614 | 50.96 | 44.52 | 32.61 | 26.52 | 24.27 |

|      |       |       |       |       |       |
|------|-------|-------|-------|-------|-------|
| 6616 | 50.93 | 44.5  | 32.6  | 26.53 | 24.27 |
| 6618 | 50.94 | 44.52 | 32.63 | 26.56 | 24.3  |
| 6620 | 50.93 | 44.52 | 32.65 | 26.58 | 24.33 |
| 6622 | 50.86 | 44.47 | 32.61 | 26.54 | 24.29 |
| 6624 | 50.83 | 44.45 | 32.6  | 26.52 | 24.28 |
| 6626 | 50.79 | 44.41 | 32.58 | 26.52 | 24.28 |
| 6628 | 50.74 | 44.39 | 32.56 | 26.51 | 24.27 |
| 6630 | 50.71 | 44.37 | 32.56 | 26.51 | 24.27 |
| 6632 | 50.69 | 44.35 | 32.55 | 26.5  | 24.25 |
| 6634 | 50.68 | 44.36 | 32.56 | 26.52 | 24.27 |
| 6636 | 50.64 | 44.33 | 32.55 | 26.51 | 24.26 |
| 6638 | 50.62 | 44.33 | 32.57 | 26.53 | 24.28 |
| 6640 | 50.57 | 44.3  | 32.54 | 26.51 | 24.26 |
| 6642 | 50.53 | 44.27 | 32.53 | 26.5  | 24.26 |
| 6644 | 50.51 | 44.25 | 32.53 | 26.5  | 24.25 |
| 6646 | 50.53 | 44.29 | 32.57 | 26.56 | 24.3  |
| 6648 | 50.47 | 44.24 | 32.54 | 26.52 | 24.27 |
| 6650 | 50.41 | 44.19 | 32.51 | 26.48 | 24.25 |
| 6652 | 50.36 | 44.16 | 32.49 | 26.46 | 24.23 |
| 6654 | 50.35 | 44.15 | 32.5  | 26.47 | 24.24 |
| 6656 | 50.32 | 44.14 | 32.49 | 26.47 | 24.24 |
| 6658 | 50.29 | 44.12 | 32.48 | 26.47 | 24.24 |
| 6660 | 50.23 | 44.07 | 32.44 | 26.44 | 24.2  |
| 6662 | 50.19 | 44.04 | 32.43 | 26.43 | 24.2  |
| 6664 | 50.17 | 44.05 | 32.44 | 26.44 | 24.2  |
| 6666 | 50.16 | 44.04 | 32.45 | 26.43 | 24.21 |
| 6668 | 50.14 | 44.02 | 32.44 | 26.45 | 24.2  |
| 6670 | 50.08 | 43.98 | 32.42 | 26.42 | 24.19 |
| 6672 | 50.07 | 43.98 | 32.43 | 26.44 | 24.21 |
| 6674 | 50.06 | 43.98 | 32.43 | 26.45 | 24.22 |
| 6676 | 50.02 | 43.96 | 32.42 | 26.45 | 24.22 |
| 6678 | 50    | 43.94 | 32.42 | 26.44 | 24.2  |
| 6680 | 49.92 | 43.88 | 32.39 | 26.41 | 24.18 |
| 6682 | 49.88 | 43.86 | 32.37 | 26.37 | 24.16 |
| 6684 | 49.86 | 43.85 | 32.37 | 26.38 | 24.18 |
| 6686 | 49.86 | 43.86 | 32.39 | 26.4  | 24.2  |
| 6688 | 49.83 | 43.84 | 32.4  | 26.42 | 24.2  |
| 6690 | 49.79 | 43.82 | 32.37 | 26.39 | 24.18 |
| 6692 | 49.79 | 43.82 | 32.39 | 26.43 | 24.21 |
| 6694 | 49.77 | 43.81 | 32.39 | 26.42 | 24.22 |
| 6696 | 49.74 | 43.79 | 32.38 | 26.42 | 24.21 |
| 6698 | 49.7  | 43.76 | 32.35 | 26.39 | 24.18 |
| 6700 | 49.66 | 43.73 | 32.35 | 26.39 | 24.17 |
| 6702 | 49.65 | 43.73 | 32.36 | 26.42 | 24.2  |

|      |       |       |       |       |       |
|------|-------|-------|-------|-------|-------|
| 6704 | 49.63 | 43.73 | 32.37 | 26.42 | 24.21 |
| 6706 | 49.6  | 43.71 | 32.36 | 26.42 | 24.2  |
| 6708 | 49.55 | 43.67 | 32.33 | 26.38 | 24.17 |
| 6710 | 49.53 | 43.67 | 32.34 | 26.4  | 24.19 |
| 6712 | 49.52 | 43.66 | 32.35 | 26.4  | 24.2  |
| 6714 | 49.47 | 43.64 | 32.34 | 26.4  | 24.21 |
| 6716 | 49.44 | 43.62 | 32.31 | 26.37 | 24.19 |
| 6718 | 49.41 | 43.6  | 32.31 | 26.38 | 24.19 |
| 6720 | 49.39 | 43.59 | 32.33 | 26.39 | 24.19 |
| 6722 | 49.34 | 43.56 | 32.3  | 26.38 | 24.19 |
| 6724 | 49.33 | 43.55 | 32.31 | 26.38 | 24.19 |
| 6726 | 49.31 | 43.54 | 32.31 | 26.38 | 24.19 |
| 6728 | 49.28 | 43.53 | 32.31 | 26.39 | 24.2  |
| 6730 | 49.25 | 43.51 | 32.28 | 26.37 | 24.17 |
| 6732 | 49.23 | 43.49 | 32.29 | 26.39 | 24.19 |
| 6734 | 49.2  | 43.48 | 32.29 | 26.38 | 24.19 |
| 6736 | 49.17 | 43.46 | 32.28 | 26.38 | 24.2  |
| 6738 | 49.14 | 43.45 | 32.28 | 26.38 | 24.19 |
| 6740 | 49.1  | 43.42 | 32.27 | 26.37 | 24.18 |
| 6742 | 49.09 | 43.42 | 32.27 | 26.37 | 24.18 |
| 6744 | 49.07 | 43.42 | 32.29 | 26.38 | 24.22 |
| 6746 | 49.02 | 43.37 | 32.26 | 26.36 | 24.19 |
| 6748 | 49    | 43.36 | 32.25 | 26.35 | 24.18 |
| 6750 | 48.99 | 43.37 | 32.28 | 26.38 | 24.22 |
| 6752 | 48.95 | 43.33 | 32.25 | 26.35 | 24.19 |
| 6754 | 48.92 | 43.31 | 32.23 | 26.35 | 24.18 |
| 6756 | 48.93 | 43.34 | 32.27 | 26.4  | 24.23 |
| 6758 | 48.92 | 43.33 | 32.28 | 26.41 | 24.24 |
| 6760 | 48.87 | 43.31 | 32.26 | 26.39 | 24.21 |
| 6762 | 48.83 | 43.28 | 32.24 | 26.37 | 24.19 |
| 6764 | 48.81 | 43.26 | 32.24 | 26.38 | 24.21 |
| 6766 | 48.81 | 43.26 | 32.26 | 26.4  | 24.22 |
| 6768 | 48.74 | 43.22 | 32.24 | 26.38 | 24.2  |
| 6770 | 48.69 | 43.2  | 32.22 | 26.34 | 24.18 |
| 6772 | 48.69 | 43.2  | 32.23 | 26.35 | 24.21 |
| 6774 | 48.64 | 43.15 | 32.19 | 26.32 | 24.17 |
| 6776 | 48.6  | 43.13 | 32.18 | 26.32 | 24.17 |
| 6778 | 48.57 | 43.11 | 32.17 | 26.32 | 24.17 |
| 6780 | 48.55 | 43.1  | 32.17 | 26.32 | 24.17 |
| 6782 | 48.52 | 43.08 | 32.17 | 26.31 | 24.17 |
| 6784 | 48.47 | 43.03 | 32.13 | 26.28 | 24.13 |
| 6786 | 48.47 | 43.04 | 32.15 | 26.31 | 24.16 |
| 6788 | 48.44 | 43.04 | 32.15 | 26.31 | 24.17 |
| 6790 | 48.37 | 42.98 | 32.1  | 26.27 | 24.12 |

|      |       |       |       |       |       |
|------|-------|-------|-------|-------|-------|
| 6792 | 48.39 | 42.99 | 32.13 | 26.3  | 24.15 |
| 6794 | 48.35 | 42.98 | 32.13 | 26.3  | 24.16 |
| 6796 | 48.32 | 42.95 | 32.1  | 26.28 | 24.14 |
| 6798 | 48.32 | 42.96 | 32.13 | 26.3  | 24.16 |
| 6800 | 48.28 | 42.94 | 32.12 | 26.3  | 24.14 |
| 6802 | 48.24 | 42.91 | 32.1  | 26.28 | 24.15 |
| 6804 | 48.17 | 42.85 | 32.06 | 26.24 | 24.1  |
| 6806 | 48.14 | 42.83 | 32.06 | 26.23 | 24.11 |
| 6808 | 48.14 | 42.84 | 32.07 | 26.26 | 24.14 |
| 6810 | 48.11 | 42.82 | 32.06 | 26.24 | 24.13 |
| 6812 | 48.1  | 42.83 | 32.08 | 26.26 | 24.16 |
| 6814 | 48.08 | 42.8  | 32.06 | 26.23 | 24.11 |
| 6816 | 48.02 | 42.76 | 32.03 | 26.22 | 24.11 |
| 6818 | 47.99 | 42.74 | 32.03 | 26.21 | 24.09 |
| 6820 | 48.01 | 42.77 | 32.06 | 26.26 | 24.13 |
| 6822 | 47.96 | 42.73 | 32.04 | 26.24 | 24.11 |
| 6824 | 47.91 | 42.69 | 32.01 | 26.22 | 24.09 |
| 6826 | 47.88 | 42.66 | 32    | 26.2  | 24.08 |
| 6828 | 47.9  | 42.7  | 32.04 | 26.26 | 24.11 |
| 6830 | 47.88 | 42.69 | 32.04 | 26.27 | 24.12 |
| 6832 | 47.85 | 42.67 | 32.03 | 26.26 | 24.13 |
| 6834 | 47.79 | 42.62 | 32.01 | 26.22 | 24.11 |
| 6836 | 47.77 | 42.61 | 32    | 26.22 | 24.11 |
| 6838 | 47.77 | 42.62 | 32.02 | 26.24 | 24.14 |
| 6840 | 47.74 | 42.61 | 32.02 | 26.24 | 24.13 |
| 6842 | 47.71 | 42.59 | 32.02 | 26.24 | 24.13 |
| 6844 | 47.69 | 42.57 | 32    | 26.24 | 24.14 |
| 6846 | 47.62 | 42.51 | 31.94 | 26.18 | 24.08 |
| 6848 | 47.58 | 42.48 | 31.94 | 26.17 | 24.06 |
| 6850 | 47.58 | 42.49 | 31.95 | 26.19 | 24.08 |
| 6852 | 47.56 | 42.49 | 31.96 | 26.21 | 24.09 |
| 6854 | 47.56 | 42.5  | 31.97 | 26.22 | 24.11 |
| 6856 | 47.52 | 42.47 | 31.96 | 26.22 | 24.12 |
| 6858 | 47.5  | 42.46 | 31.97 | 26.22 | 24.11 |
| 6860 | 47.47 | 42.43 | 31.94 | 26.19 | 24.08 |
| 6862 | 47.41 | 42.38 | 31.91 | 26.16 | 24.06 |
| 6864 | 47.39 | 42.37 | 31.91 | 26.16 | 24.08 |
| 6866 | 47.38 | 42.37 | 31.92 | 26.18 | 24.09 |
| 6868 | 47.36 | 42.37 | 31.94 | 26.2  | 24.11 |
| 6870 | 47.35 | 42.37 | 31.95 | 26.2  | 24.12 |
| 6872 | 47.33 | 42.36 | 31.94 | 26.21 | 24.12 |
| 6874 | 47.3  | 42.33 | 31.92 | 26.2  | 24.11 |
| 6876 | 47.28 | 42.32 | 31.93 | 26.19 | 24.11 |
| 6878 | 47.24 | 42.29 | 31.91 | 26.19 | 24.1  |

|      |       |       |       |       |       |
|------|-------|-------|-------|-------|-------|
| 6880 | 47.23 | 42.3  | 31.92 | 26.2  | 24.11 |
| 6882 | 47.17 | 42.25 | 31.9  | 26.18 | 24.08 |
| 6884 | 47.12 | 42.21 | 31.85 | 26.14 | 24.05 |
| 6886 | 47.14 | 42.23 | 31.88 | 26.18 | 24.08 |
| 6888 | 47.1  | 42.21 | 31.87 | 26.17 | 24.07 |
| 6890 | 47.1  | 42.22 | 31.9  | 26.2  | 24.11 |
| 6892 | 47.09 | 42.21 | 31.9  | 26.2  | 24.1  |
| 6894 | 47.06 | 42.19 | 31.89 | 26.19 | 24.1  |
| 6896 | 47.02 | 42.17 | 31.87 | 26.17 | 24.09 |
| 6898 | 47    | 42.15 | 31.88 | 26.17 | 24.1  |
| 6900 | 46.97 | 42.14 | 31.87 | 26.16 | 24.1  |
| 6902 | 46.93 | 42.1  | 31.85 | 26.15 | 24.09 |
| 6904 | 46.88 | 42.08 | 31.83 | 26.13 | 24.06 |
| 6906 | 46.84 | 42.04 | 31.81 | 26.11 | 24.05 |
| 6908 | 46.84 | 42.05 | 31.82 | 26.14 | 24.08 |
| 6910 | 46.84 | 42.05 | 31.84 | 26.15 | 24.09 |
| 6912 | 46.83 | 42.05 | 31.84 | 26.16 | 24.09 |
| 6914 | 46.76 | 41.99 | 31.8  | 26.12 | 24.06 |
| 6916 | 46.76 | 42.01 | 31.82 | 26.13 | 24.08 |
| 6918 | 46.74 | 41.99 | 31.81 | 26.13 | 24.07 |
| 6920 | 46.7  | 41.96 | 31.8  | 26.13 | 24.08 |
| 6922 | 46.7  | 41.97 | 31.81 | 26.14 | 24.09 |
| 6924 | 46.63 | 41.92 | 31.77 | 26.11 | 24.06 |
| 6926 | 46.64 | 41.93 | 31.79 | 26.13 | 24.08 |
| 6928 | 46.61 | 41.9  | 31.78 | 26.11 | 24.06 |
| 6930 | 46.59 | 41.89 | 31.78 | 26.12 | 24.08 |
| 6932 | 46.57 | 41.89 | 31.78 | 26.13 | 24.08 |
| 6934 | 46.55 | 41.88 | 31.78 | 26.14 | 24.09 |
| 6936 | 46.52 | 41.87 | 31.78 | 26.14 | 24.08 |
| 6938 | 46.5  | 41.86 | 31.78 | 26.14 | 24.08 |
| 6940 | 46.48 | 41.85 | 31.78 | 26.14 | 24.08 |
| 6942 | 46.47 | 41.85 | 31.8  | 26.16 | 24.1  |
| 6944 | 46.45 | 41.84 | 31.8  | 26.16 | 24.12 |
| 6946 | 46.41 | 41.8  | 31.78 | 26.14 | 24.09 |
| 6948 | 46.37 | 41.77 | 31.75 | 26.13 | 24.07 |
| 6950 | 46.35 | 41.77 | 31.75 | 26.13 | 24.08 |
| 6952 | 46.32 | 41.75 | 31.75 | 26.13 | 24.08 |
| 6954 | 46.27 | 41.71 | 31.72 | 26.09 | 24.06 |
| 6956 | 46.28 | 41.73 | 31.74 | 26.11 | 24.08 |
| 6958 | 46.24 | 41.7  | 31.73 | 26.11 | 24.08 |
| 6960 | 46.21 | 41.69 | 31.73 | 26.1  | 24.08 |
| 6962 | 46.21 | 41.67 | 31.73 | 26.11 | 24.08 |
| 6964 | 46.17 | 41.66 | 31.71 | 26.1  | 24.08 |
| 6966 | 46.14 | 41.64 | 31.71 | 26.09 | 24.06 |

|      |       |       |       |       |       |
|------|-------|-------|-------|-------|-------|
| 6968 | 46.12 | 41.62 | 31.7  | 26.09 | 24.07 |
| 6970 | 46.11 | 41.63 | 31.71 | 26.12 | 24.09 |
| 6972 | 46.08 | 41.61 | 31.71 | 26.11 | 24.08 |
| 6974 | 46.09 | 41.63 | 31.74 | 26.15 | 24.11 |
| 6976 | 46.03 | 41.58 | 31.7  | 26.1  | 24.08 |
| 6978 | 46.02 | 41.57 | 31.7  | 26.1  | 24.08 |
| 6980 | 45.99 | 41.57 | 31.71 | 26.13 | 24.09 |
| 6982 | 45.96 | 41.54 | 31.69 | 26.1  | 24.07 |
| 6984 | 45.96 | 41.55 | 31.71 | 26.13 | 24.1  |
| 6986 | 45.93 | 41.52 | 31.71 | 26.11 | 24.1  |
| 6988 | 45.91 | 41.53 | 31.71 | 26.12 | 24.12 |
| 6990 | 45.89 | 41.52 | 31.7  | 26.12 | 24.11 |
| 6992 | 45.87 | 41.51 | 31.72 | 26.13 | 24.12 |
| 6994 | 45.8  | 41.45 | 31.66 | 26.08 | 24.07 |
| 6996 | 45.77 | 41.43 | 31.64 | 26.07 | 24.07 |
| 6998 | 45.77 | 41.42 | 31.65 | 26.08 | 24.07 |
| 7000 | 45.75 | 41.43 | 31.65 | 26.08 | 24.08 |
| 7002 | 45.7  | 41.39 | 31.63 | 26.07 | 24.06 |
| 7004 | 45.7  | 41.39 | 31.65 | 26.1  | 24.08 |
| 7006 | 45.66 | 41.36 | 31.63 | 26.07 | 24.07 |
| 7008 | 45.62 | 41.33 | 31.6  | 26.05 | 24.05 |
| 7010 | 45.61 | 41.33 | 31.62 | 26.07 | 24.05 |
| 7012 | 45.59 | 41.31 | 31.61 | 26.06 | 24.05 |
| 7014 | 45.55 | 41.29 | 31.6  | 26.05 | 24.05 |
| 7016 | 45.57 | 41.32 | 31.63 | 26.09 | 24.1  |
| 7018 | 45.52 | 41.28 | 31.61 | 26.07 | 24.08 |
| 7020 | 45.5  | 41.28 | 31.63 | 26.08 | 24.1  |
| 7022 | 45.47 | 41.24 | 31.59 | 26.04 | 24.08 |
| 7024 | 45.45 | 41.24 | 31.61 | 26.07 | 24.09 |
| 7026 | 45.46 | 41.24 | 31.62 | 26.09 | 24.1  |
| 7028 | 45.41 | 41.21 | 31.58 | 26.04 | 24.06 |
| 7030 | 45.36 | 41.17 | 31.56 | 26.03 | 24.05 |
| 7032 | 45.34 | 41.17 | 31.56 | 26.03 | 24.04 |
| 7034 | 45.33 | 41.15 | 31.55 | 26.04 | 24.05 |
| 7036 | 45.3  | 41.14 | 31.55 | 26.04 | 24.04 |
| 7038 | 45.26 | 41.12 | 31.54 | 26.03 | 24.03 |
| 7040 | 45.24 | 41.11 | 31.55 | 26.03 | 24.04 |
| 7042 | 45.23 | 41.09 | 31.54 | 26.02 | 24.04 |
| 7044 | 45.2  | 41.08 | 31.54 | 26.02 | 24.04 |
| 7046 | 45.18 | 41.07 | 31.53 | 26.02 | 24.04 |
| 7048 | 45.16 | 41.05 | 31.52 | 26.02 | 24.03 |
| 7050 | 45.14 | 41.04 | 31.54 | 26.03 | 24.05 |
| 7052 | 45.08 | 41    | 31.49 | 25.99 | 24.02 |
| 7054 | 45.08 | 41.01 | 31.5  | 26    | 24.03 |



|      |       |       |       |       |       |
|------|-------|-------|-------|-------|-------|
| 7056 | 45.02 | 40.95 | 31.46 | 25.97 | 24.01 |
| 7058 | 44.99 | 40.93 | 31.45 | 25.95 | 23.99 |
| 7060 | 45    | 40.96 | 31.48 | 25.98 | 24.03 |
| 7062 | 44.98 | 40.95 | 31.47 | 25.99 | 24.03 |
| 7064 | 44.96 | 40.93 | 31.48 | 25.99 | 24.03 |
| 7066 | 44.92 | 40.9  | 31.45 | 25.96 | 24    |
| 7068 | 44.91 | 40.9  | 31.47 | 25.98 | 24.02 |
| 7070 | 44.91 | 40.91 | 31.48 | 26    | 24.02 |
| 7072 | 44.87 | 40.87 | 31.46 | 25.98 | 24.01 |
| 7074 | 44.85 | 40.87 | 31.46 | 25.99 | 24.02 |
| 7076 | 44.83 | 40.86 | 31.47 | 26    | 24.04 |
| 7078 | 44.82 | 40.86 | 31.47 | 26    | 24.03 |
| 7080 | 44.78 | 40.82 | 31.45 | 25.98 | 24.02 |
| 7082 | 44.76 | 40.81 | 31.45 | 25.98 | 24.02 |
| 7084 | 44.73 | 40.79 | 31.44 | 25.98 | 24.02 |
| 7086 | 44.7  | 40.77 | 31.42 | 25.97 | 24.02 |
| 7088 | 44.67 | 40.75 | 31.41 | 25.95 | 24.01 |
| 7090 | 44.66 | 40.75 | 31.42 | 25.96 | 24.02 |
| 7092 | 44.62 | 40.72 | 31.39 | 25.95 | 24.01 |
| 7094 | 44.62 | 40.72 | 31.4  | 25.95 | 24.01 |
| 7096 | 44.6  | 40.7  | 31.4  | 25.96 | 24.02 |
| 7098 | 44.57 | 40.68 | 31.38 | 25.94 | 23.99 |
| 7100 | 44.56 | 40.68 | 31.39 | 25.96 | 24.01 |
| 7102 | 44.54 | 40.67 | 31.39 | 25.96 | 24.01 |
| 7104 | 44.51 | 40.66 | 31.39 | 25.96 | 24.01 |
| 7106 | 44.48 | 40.63 | 31.38 | 25.94 | 23.99 |
| 7108 | 44.46 | 40.62 | 31.36 | 25.93 | 23.99 |
| 7110 | 44.45 | 40.62 | 31.38 | 25.95 | 24    |
| 7112 | 44.42 | 40.6  | 31.37 | 25.94 | 24.01 |
| 7114 | 44.39 | 40.58 | 31.36 | 25.94 | 24.01 |
| 7116 | 44.37 | 40.58 | 31.37 | 25.94 | 24.02 |
| 7118 | 44.35 | 40.57 | 31.36 | 25.94 | 24.02 |
| 7120 | 44.32 | 40.55 | 31.35 | 25.93 | 24.01 |
| 7122 | 44.31 | 40.53 | 31.34 | 25.93 | 24.01 |
| 7124 | 44.3  | 40.54 | 31.36 | 25.94 | 24.03 |
| 7126 | 44.27 | 40.53 | 31.37 | 25.96 | 24.04 |
| 7128 | 44.25 | 40.5  | 31.34 | 25.94 | 24.02 |
| 7130 | 44.22 | 40.47 | 31.32 | 25.93 | 24    |
| 7132 | 44.22 | 40.49 | 31.35 | 25.94 | 24.02 |
| 7134 | 44.18 | 40.46 | 31.33 | 25.93 | 24.01 |
| 7136 | 44.18 | 40.47 | 31.34 | 25.95 | 24.03 |
| 7138 | 44.15 | 40.46 | 31.35 | 25.97 | 24.05 |
| 7140 | 44.11 | 40.42 | 31.32 | 25.93 | 24.01 |
| 7142 | 44.08 | 40.4  | 31.31 | 25.92 | 24.01 |

|      |       |       |       |       |       |
|------|-------|-------|-------|-------|-------|
| 7144 | 44.06 | 40.38 | 31.29 | 25.91 | 24.01 |
| 7146 | 44.03 | 40.37 | 31.3  | 25.91 | 24.01 |
| 7148 | 44.01 | 40.35 | 31.29 | 25.9  | 24.01 |
| 7150 | 44    | 40.36 | 31.3  | 25.91 | 24.02 |
| 7152 | 43.98 | 40.34 | 31.29 | 25.91 | 24.03 |
| 7154 | 43.97 | 40.34 | 31.3  | 25.93 | 24.03 |
| 7156 | 43.93 | 40.31 | 31.27 | 25.91 | 24.01 |
| 7158 | 43.91 | 40.3  | 31.27 | 25.92 | 24    |
| 7160 | 43.91 | 40.3  | 31.28 | 25.92 | 24.01 |
| 7162 | 43.87 | 40.27 | 31.26 | 25.91 | 24    |
| 7164 | 43.86 | 40.27 | 31.28 | 25.92 | 24.01 |
| 7166 | 43.85 | 40.27 | 31.28 | 25.92 | 24.01 |
| 7168 | 43.81 | 40.23 | 31.26 | 25.91 | 24.01 |
| 7170 | 43.78 | 40.21 | 31.24 | 25.9  | 24.01 |
| 7172 | 43.75 | 40.2  | 31.23 | 25.89 | 24    |
| 7174 | 43.74 | 40.2  | 31.25 | 25.89 | 24.01 |
| 7176 | 43.7  | 40.17 | 31.23 | 25.88 | 24    |
| 7178 | 43.68 | 40.16 | 31.23 | 25.88 | 24    |
| 7180 | 43.66 | 40.14 | 31.21 | 25.88 | 24    |
| 7182 | 43.67 | 40.15 | 31.24 | 25.9  | 24.02 |
| 7184 | 43.65 | 40.14 | 31.23 | 25.9  | 24.01 |
| 7186 | 43.65 | 40.14 | 31.23 | 25.91 | 24.01 |
| 7188 | 43.65 | 40.16 | 31.27 | 25.94 | 24.06 |
| 7190 | 43.59 | 40.11 | 31.23 | 25.91 | 24.01 |
| 7192 | 43.56 | 40.1  | 31.24 | 25.91 | 24.03 |
| 7194 | 43.52 | 40.06 | 31.19 | 25.89 | 23.99 |
| 7196 | 43.5  | 40.05 | 31.19 | 25.88 | 23.99 |
| 7198 | 43.47 | 40.03 | 31.19 | 25.87 | 23.99 |
| 7200 | 43.49 | 40.05 | 31.21 | 25.9  | 24.03 |
| 7202 | 43.44 | 40.02 | 31.18 | 25.87 | 24.01 |
| 7204 | 43.42 | 39.99 | 31.17 | 25.86 | 24.01 |
| 7206 | 43.38 | 39.97 | 31.16 | 25.85 | 23.98 |
| 7208 | 43.36 | 39.96 | 31.16 | 25.85 | 23.98 |
| 7210 | 43.36 | 39.97 | 31.17 | 25.86 | 24    |
| 7212 | 43.32 | 39.94 | 31.14 | 25.85 | 23.99 |
| 7214 | 43.33 | 39.94 | 31.16 | 25.87 | 23.99 |
| 7216 | 43.32 | 39.95 | 31.18 | 25.9  | 24.02 |
| 7218 | 43.32 | 39.96 | 31.2  | 25.91 | 24.04 |
| 7220 | 43.27 | 39.93 | 31.18 | 25.9  | 24.03 |
| 7222 | 43.24 | 39.91 | 31.17 | 25.88 | 24.01 |
| 7224 | 43.22 | 39.89 | 31.16 | 25.89 | 24.01 |
| 7226 | 43.23 | 39.91 | 31.18 | 25.91 | 24.04 |
| 7228 | 43.16 | 39.85 | 31.13 | 25.86 | 24    |
| 7230 | 43.11 | 39.81 | 31.11 | 25.83 | 23.97 |

|      |       |       |       |       |       |
|------|-------|-------|-------|-------|-------|
| 7232 | 43.09 | 39.8  | 31.1  | 25.82 | 23.97 |
| 7234 | 43.1  | 39.8  | 31.11 | 25.83 | 23.98 |
| 7236 | 43.08 | 39.8  | 31.11 | 25.83 | 23.99 |
| 7238 | 43.05 | 39.78 | 31.1  | 25.83 | 23.97 |
| 7240 | 43.01 | 39.75 | 31.08 | 25.82 | 23.96 |
| 7242 | 42.99 | 39.73 | 31.07 | 25.81 | 23.96 |
| 7244 | 43    | 39.74 | 31.08 | 25.82 | 23.97 |
| 7246 | 43.02 | 39.77 | 31.13 | 25.88 | 24.01 |
| 7248 | 42.95 | 39.72 | 31.09 | 25.85 | 23.97 |
| 7250 | 42.91 | 39.69 | 31.07 | 25.82 | 23.96 |
| 7252 | 42.89 | 39.67 | 31.06 | 25.82 | 23.96 |
| 7254 | 42.88 | 39.66 | 31.06 | 25.82 | 23.96 |
| 7256 | 42.86 | 39.65 | 31.05 | 25.82 | 23.96 |
| 7258 | 42.8  | 39.6  | 31.01 | 25.78 | 23.93 |
| 7260 | 42.78 | 39.59 | 31.01 | 25.78 | 23.93 |
| 7262 | 42.79 | 39.61 | 31.05 | 25.81 | 23.96 |
| 7264 | 42.75 | 39.57 | 31.01 | 25.79 | 23.93 |
| 7266 | 42.75 | 39.58 | 31.03 | 25.81 | 23.96 |
| 7268 | 42.74 | 39.57 | 31.03 | 25.8  | 23.96 |
| 7270 | 42.71 | 39.56 | 31.02 | 25.8  | 23.95 |
| 7272 | 42.72 | 39.56 | 31.02 | 25.81 | 23.96 |
| 7274 | 42.73 | 39.59 | 31.07 | 25.85 | 24.01 |
| 7276 | 42.69 | 39.56 | 31.05 | 25.84 | 24    |
| 7278 | 42.68 | 39.57 | 31.06 | 25.85 | 24.01 |
| 7280 | 42.64 | 39.54 | 31.04 | 25.84 | 24    |
| 7282 | 42.57 | 39.47 | 30.99 | 25.78 | 23.94 |
| 7284 | 42.56 | 39.46 | 30.99 | 25.79 | 23.94 |
| 7286 | 42.56 | 39.48 | 31    | 25.81 | 23.97 |
| 7288 | 42.53 | 39.43 | 30.96 | 25.77 | 23.94 |
| 7290 | 42.52 | 39.45 | 30.99 | 25.78 | 23.96 |
| 7292 | 42.47 | 39.42 | 30.97 | 25.77 | 23.94 |
| 7294 | 42.48 | 39.42 | 30.98 | 25.77 | 23.95 |
| 7296 | 42.48 | 39.44 | 31.01 | 25.8  | 23.98 |
| 7298 | 42.48 | 39.44 | 31.02 | 25.83 | 24    |
| 7300 | 42.45 | 39.42 | 31.01 | 25.81 | 23.98 |
| 7302 | 42.38 | 39.36 | 30.95 | 25.76 | 23.95 |
| 7304 | 42.38 | 39.37 | 30.97 | 25.78 | 23.97 |
| 7306 | 42.38 | 39.38 | 31.01 | 25.82 | 24    |
| 7308 | 42.34 | 39.34 | 30.96 | 25.79 | 23.97 |
| 7310 | 42.33 | 39.34 | 30.96 | 25.79 | 23.96 |
| 7312 | 42.29 | 39.31 | 30.94 | 25.77 | 23.94 |
| 7314 | 42.27 | 39.29 | 30.93 | 25.77 | 23.94 |
| 7316 | 42.25 | 39.28 | 30.93 | 25.77 | 23.95 |
| 7318 | 42.25 | 39.28 | 30.93 | 25.77 | 23.95 |

|      |       |       |       |       |       |
|------|-------|-------|-------|-------|-------|
| 7320 | 42.22 | 39.26 | 30.92 | 25.76 | 23.94 |
| 7322 | 42.2  | 39.25 | 30.92 | 25.76 | 23.94 |
| 7324 | 42.2  | 39.26 | 30.92 | 25.77 | 23.96 |
| 7326 | 42.17 | 39.23 | 30.92 | 25.76 | 23.95 |
| 7328 | 42.13 | 39.2  | 30.9  | 25.75 | 23.94 |
| 7330 | 42.09 | 39.19 | 30.89 | 25.74 | 23.93 |
| 7332 | 42.08 | 39.18 | 30.89 | 25.74 | 23.93 |
| 7334 | 42.06 | 39.16 | 30.87 | 25.72 | 23.91 |
| 7336 | 42.05 | 39.15 | 30.88 | 25.73 | 23.93 |
| 7338 | 42.04 | 39.14 | 30.89 | 25.73 | 23.94 |
| 7340 | 42.01 | 39.14 | 30.88 | 25.74 | 23.94 |
| 7342 | 42.01 | 39.13 | 30.88 | 25.75 | 23.94 |
| 7344 | 41.99 | 39.11 | 30.86 | 25.73 | 23.91 |
| 7346 | 41.96 | 39.09 | 30.86 | 25.73 | 23.91 |
| 7348 | 41.94 | 39.08 | 30.84 | 25.73 | 23.91 |
| 7350 | 41.91 | 39.07 | 30.85 | 25.72 | 23.91 |
| 7352 | 41.9  | 39.07 | 30.85 | 25.73 | 23.91 |
| 7354 | 41.88 | 39.05 | 30.85 | 25.74 | 23.92 |
| 7356 | 41.87 | 39.03 | 30.83 | 25.72 | 23.91 |
| 7358 | 41.81 | 38.99 | 30.79 | 25.69 | 23.89 |
| 7360 | 41.79 | 38.98 | 30.8  | 25.69 | 23.89 |
| 7362 | 41.78 | 38.98 | 30.8  | 25.68 | 23.9  |
| 7364 | 41.78 | 38.98 | 30.81 | 25.69 | 23.91 |
| 7366 | 41.75 | 38.96 | 30.81 | 25.71 | 23.92 |
| 7368 | 41.75 | 38.97 | 30.82 | 25.72 | 23.93 |
| 7370 | 41.71 | 38.94 | 30.8  | 25.7  | 23.92 |
| 7372 | 41.71 | 38.94 | 30.8  | 25.71 | 23.92 |
| 7374 | 41.7  | 38.94 | 30.82 | 25.72 | 23.93 |
| 7376 | 41.68 | 38.93 | 30.81 | 25.72 | 23.93 |
| 7378 | 41.66 | 38.91 | 30.82 | 25.72 | 23.93 |
| 7380 | 41.63 | 38.89 | 30.8  | 25.7  | 23.92 |
| 7382 | 41.61 | 38.88 | 30.79 | 25.7  | 23.92 |
| 7384 | 41.59 | 38.86 | 30.78 | 25.68 | 23.91 |
| 7386 | 41.59 | 38.87 | 30.79 | 25.7  | 23.92 |
| 7388 | 41.55 | 38.85 | 30.78 | 25.7  | 23.9  |
| 7390 | 41.54 | 38.83 | 30.76 | 25.7  | 23.91 |
| 7392 | 41.53 | 38.83 | 30.77 | 25.7  | 23.9  |
| 7394 | 41.52 | 38.82 | 30.78 | 25.7  | 23.9  |
| 7396 | 41.5  | 38.82 | 30.78 | 25.72 | 23.92 |
| 7398 | 41.48 | 38.81 | 30.78 | 25.71 | 23.93 |
| 7400 | 41.46 | 38.79 | 30.76 | 25.69 | 23.9  |
| 7402 | 41.45 | 38.78 | 30.76 | 25.7  | 23.92 |
| 7404 | 41.46 | 38.81 | 30.79 | 25.73 | 23.95 |
| 7406 | 41.45 | 38.8  | 30.8  | 25.76 | 23.96 |

|      |       |       |       |       |       |
|------|-------|-------|-------|-------|-------|
| 7408 | 41.42 | 38.78 | 30.79 | 25.75 | 23.95 |
| 7410 | 41.4  | 38.75 | 30.77 | 25.72 | 23.93 |
| 7412 | 41.36 | 38.73 | 30.75 | 25.69 | 23.91 |
| 7414 | 41.34 | 38.71 | 30.73 | 25.68 | 23.9  |
| 7416 | 41.33 | 38.71 | 30.73 | 25.68 | 23.91 |
| 7418 | 41.3  | 38.7  | 30.74 | 25.69 | 23.92 |
| 7420 | 41.27 | 38.67 | 30.73 | 25.68 | 23.91 |
| 7422 | 41.25 | 38.66 | 30.73 | 25.68 | 23.9  |
| 7424 | 41.26 | 38.68 | 30.74 | 25.7  | 23.93 |
| 7426 | 41.23 | 38.67 | 30.74 | 25.7  | 23.93 |
| 7428 | 41.15 | 38.59 | 30.68 | 25.66 | 23.88 |
| 7430 | 41.19 | 38.63 | 30.72 | 25.7  | 23.92 |
| 7432 | 41.16 | 38.61 | 30.71 | 25.68 | 23.91 |
| 7434 | 41.14 | 38.6  | 30.7  | 25.67 | 23.9  |
| 7436 | 41.13 | 38.59 | 30.71 | 25.68 | 23.92 |
| 7438 | 41.11 | 38.58 | 30.69 | 25.67 | 23.9  |
| 7440 | 41.11 | 38.58 | 30.7  | 25.68 | 23.9  |
| 7442 | 41.05 | 38.54 | 30.67 | 25.66 | 23.89 |
| 7444 | 41.05 | 38.53 | 30.67 | 25.66 | 23.89 |
| 7446 | 41.04 | 38.53 | 30.68 | 25.67 | 23.91 |
| 7448 | 41.02 | 38.52 | 30.67 | 25.66 | 23.89 |
| 7450 | 41    | 38.5  | 30.66 | 25.65 | 23.9  |
| 7452 | 40.95 | 38.47 | 30.64 | 25.63 | 23.88 |
| 7454 | 40.96 | 38.49 | 30.66 | 25.65 | 23.9  |
| 7456 | 40.93 | 38.47 | 30.65 | 25.65 | 23.91 |
| 7458 | 40.91 | 38.45 | 30.64 | 25.64 | 23.89 |
| 7460 | 40.89 | 38.44 | 30.65 | 25.64 | 23.89 |
| 7462 | 40.88 | 38.43 | 30.64 | 25.64 | 23.89 |
| 7464 | 40.86 | 38.41 | 30.64 | 25.64 | 23.89 |
| 7466 | 40.84 | 38.4  | 30.63 | 25.64 | 23.89 |
| 7468 | 40.82 | 38.38 | 30.62 | 25.63 | 23.87 |
| 7470 | 40.79 | 38.37 | 30.6  | 25.62 | 23.86 |
| 7472 | 40.74 | 38.33 | 30.57 | 25.59 | 23.84 |
| 7474 | 40.72 | 38.31 | 30.56 | 25.58 | 23.83 |
| 7476 | 40.75 | 38.35 | 30.61 | 25.63 | 23.88 |
| 7478 | 40.74 | 38.34 | 30.6  | 25.63 | 23.86 |
| 7480 | 40.68 | 38.28 | 30.55 | 25.58 | 23.82 |
| 7482 | 40.66 | 38.29 | 30.58 | 25.6  | 23.84 |
| 7484 | 40.68 | 38.32 | 30.6  | 25.63 | 23.9  |
| 7486 | 40.68 | 38.32 | 30.59 | 25.63 | 23.89 |
| 7488 | 40.7  | 38.34 | 30.64 | 25.67 | 23.94 |
| 7490 | 40.66 | 38.31 | 30.62 | 25.67 | 23.93 |
| 7492 | 40.66 | 38.31 | 30.63 | 25.67 | 23.94 |
| 7494 | 40.64 | 38.3  | 30.62 | 25.66 | 23.92 |

|      |       |       |       |       |       |
|------|-------|-------|-------|-------|-------|
| 7496 | 40.62 | 38.28 | 30.6  | 25.65 | 23.92 |
| 7498 | 40.62 | 38.29 | 30.62 | 25.68 | 23.94 |
| 7500 | 40.58 | 38.26 | 30.6  | 25.65 | 23.91 |
| 7502 | 40.56 | 38.25 | 30.59 | 25.65 | 23.91 |
| 7504 | 40.51 | 38.22 | 30.58 | 25.63 | 23.89 |
| 7506 | 40.55 | 38.26 | 30.62 | 25.67 | 23.94 |
| 7508 | 40.52 | 38.21 | 30.59 | 25.65 | 23.91 |
| 7510 | 40.47 | 38.17 | 30.56 | 25.61 | 23.88 |
| 7512 | 40.45 | 38.16 | 30.55 | 25.62 | 23.88 |
| 7514 | 40.42 | 38.15 | 30.54 | 25.61 | 23.87 |
| 7516 | 40.42 | 38.15 | 30.55 | 25.6  | 23.88 |
| 7518 | 40.41 | 38.15 | 30.55 | 25.6  | 23.89 |
| 7520 | 40.37 | 38.12 | 30.53 | 25.6  | 23.88 |
| 7522 | 40.36 | 38.11 | 30.54 | 25.6  | 23.87 |
| 7524 | 40.35 | 38.1  | 30.53 | 25.61 | 23.88 |
| 7526 | 40.33 | 38.1  | 30.53 | 25.61 | 23.89 |
| 7528 | 40.3  | 38.07 | 30.52 | 25.59 | 23.87 |
| 7530 | 40.28 | 38.07 | 30.51 | 25.6  | 23.87 |
| 7532 | 40.27 | 38.05 | 30.51 | 25.59 | 23.87 |
| 7534 | 40.26 | 38.04 | 30.51 | 25.6  | 23.87 |
| 7536 | 40.24 | 38.04 | 30.51 | 25.6  | 23.87 |
| 7538 | 40.22 | 38.02 | 30.5  | 25.59 | 23.85 |
| 7540 | 40.21 | 38.03 | 30.5  | 25.6  | 23.86 |
| 7542 | 40.19 | 38    | 30.49 | 25.58 | 23.85 |
| 7544 | 40.17 | 38    | 30.5  | 25.6  | 23.87 |
| 7546 | 40.16 | 37.99 | 30.49 | 25.59 | 23.87 |
| 7548 | 40.13 | 37.97 | 30.48 | 25.57 | 23.85 |
| 7550 | 40.13 | 37.96 | 30.49 | 25.59 | 23.86 |
| 7552 | 40.12 | 37.96 | 30.48 | 25.59 | 23.86 |
| 7554 | 40.09 | 37.95 | 30.49 | 25.59 | 23.86 |
| 7556 | 40.08 | 37.94 | 30.48 | 25.58 | 23.86 |
| 7558 | 40.05 | 37.92 | 30.47 | 25.58 | 23.87 |
| 7560 | 40.02 | 37.89 | 30.45 | 25.56 | 23.85 |
| 7562 | 40.01 | 37.9  | 30.46 | 25.57 | 23.86 |
| 7564 | 40    | 37.89 | 30.46 | 25.58 | 23.86 |
| 7566 | 39.98 | 37.88 | 30.45 | 25.58 | 23.86 |
| 7568 | 39.97 | 37.87 | 30.45 | 25.57 | 23.86 |
| 7570 | 39.94 | 37.84 | 30.44 | 25.56 | 23.86 |
| 7572 | 39.91 | 37.83 | 30.42 | 25.55 | 23.84 |
| 7574 | 39.92 | 37.85 | 30.44 | 25.58 | 23.85 |
| 7576 | 39.9  | 37.82 | 30.42 | 25.55 | 23.84 |
| 7578 | 39.82 | 37.77 | 30.39 | 25.52 | 23.8  |
| 7580 | 39.87 | 37.81 | 30.43 | 25.57 | 23.85 |
| 7582 | 39.86 | 37.81 | 30.43 | 25.57 | 23.86 |

|      |       |       |       |       |       |
|------|-------|-------|-------|-------|-------|
| 7584 | 39.84 | 37.78 | 30.42 | 25.55 | 23.83 |
| 7586 | 39.79 | 37.75 | 30.4  | 25.54 | 23.82 |
| 7588 | 39.83 | 37.79 | 30.44 | 25.58 | 23.87 |
| 7590 | 39.79 | 37.76 | 30.42 | 25.56 | 23.87 |
| 7592 | 39.77 | 37.74 | 30.41 | 25.55 | 23.86 |
| 7594 | 39.75 | 37.73 | 30.41 | 25.55 | 23.86 |
| 7596 | 39.72 | 37.71 | 30.37 | 25.53 | 23.84 |
| 7598 | 39.72 | 37.7  | 30.39 | 25.54 | 23.84 |
| 7600 | 39.7  | 37.69 | 30.37 | 25.54 | 23.83 |
| 7602 | 39.67 | 37.66 | 30.37 | 25.52 | 23.82 |
| 7604 | 39.71 | 37.72 | 30.42 | 25.58 | 23.87 |
| 7606 | 39.68 | 37.68 | 30.39 | 25.56 | 23.86 |
| 7608 | 39.66 | 37.68 | 30.4  | 25.56 | 23.86 |
| 7610 | 39.65 | 37.67 | 30.4  | 25.58 | 23.88 |
| 7612 | 39.63 | 37.66 | 30.41 | 25.57 | 23.89 |
| 7614 | 39.59 | 37.64 | 30.37 | 25.55 | 23.86 |
| 7616 | 39.6  | 37.64 | 30.38 | 25.55 | 23.86 |
| 7618 | 39.57 | 37.64 | 30.39 | 25.56 | 23.87 |
| 7620 | 39.55 | 37.61 | 30.37 | 25.55 | 23.86 |
| 7622 | 39.52 | 37.59 | 30.35 | 25.54 | 23.85 |
| 7624 | 39.54 | 37.63 | 30.39 | 25.58 | 23.88 |
| 7626 | 39.49 | 37.58 | 30.36 | 25.54 | 23.85 |
| 7628 | 39.48 | 37.56 | 30.35 | 25.54 | 23.84 |
| 7630 | 39.47 | 37.56 | 30.35 | 25.54 | 23.84 |
| 7632 | 39.45 | 37.55 | 30.33 | 25.55 | 23.84 |
| 7634 | 39.43 | 37.53 | 30.35 | 25.54 | 23.85 |
| 7636 | 39.42 | 37.53 | 30.34 | 25.55 | 23.86 |
| 7638 | 39.4  | 37.52 | 30.34 | 25.53 | 23.84 |
| 7640 | 39.41 | 37.55 | 30.37 | 25.57 | 23.88 |
| 7642 | 39.39 | 37.52 | 30.35 | 25.56 | 23.87 |
| 7644 | 39.4  | 37.54 | 30.37 | 25.57 | 23.89 |
| 7646 | 39.39 | 37.53 | 30.37 | 25.57 | 23.89 |
| 7648 | 39.36 | 37.52 | 30.37 | 25.57 | 23.9  |
| 7650 | 39.33 | 37.5  | 30.36 | 25.56 | 23.88 |
| 7652 | 39.27 | 37.44 | 30.3  | 25.51 | 23.85 |
| 7654 | 39.25 | 37.42 | 30.29 | 25.5  | 23.83 |
| 7656 | 39.23 | 37.41 | 30.29 | 25.5  | 23.83 |
| 7658 | 39.22 | 37.4  | 30.29 | 25.51 | 23.83 |
| 7660 | 39.21 | 37.4  | 30.29 | 25.52 | 23.83 |
| 7662 | 39.2  | 37.39 | 30.29 | 25.51 | 23.83 |
| 7664 | 39.19 | 37.38 | 30.28 | 25.51 | 23.83 |
| 7666 | 39.17 | 37.37 | 30.28 | 25.51 | 23.83 |
| 7668 | 39.16 | 37.36 | 30.27 | 25.51 | 23.83 |
| 7670 | 39.13 | 37.34 | 30.26 | 25.48 | 23.81 |

|      |       |       |       |       |       |
|------|-------|-------|-------|-------|-------|
| 7672 | 39.11 | 37.33 | 30.26 | 25.5  | 23.81 |
| 7674 | 39.1  | 37.33 | 30.27 | 25.5  | 23.83 |
| 7676 | 39.09 | 37.32 | 30.26 | 25.5  | 23.82 |
| 7678 | 39.07 | 37.31 | 30.26 | 25.51 | 23.82 |
| 7680 | 39.06 | 37.3  | 30.26 | 25.5  | 23.82 |
| 7682 | 39.03 | 37.29 | 30.25 | 25.49 | 23.82 |
| 7684 | 39    | 37.26 | 30.24 | 25.48 | 23.81 |
| 7686 | 38.98 | 37.24 | 30.21 | 25.46 | 23.8  |
| 7688 | 38.99 | 37.25 | 30.24 | 25.49 | 23.82 |
| 7690 | 38.99 | 37.27 | 30.26 | 25.52 | 23.85 |
| 7692 | 38.94 | 37.22 | 30.22 | 25.48 | 23.81 |
| 7694 | 38.94 | 37.22 | 30.23 | 25.49 | 23.82 |
| 7696 | 38.91 | 37.2  | 30.21 | 25.46 | 23.79 |
| 7698 | 38.9  | 37.21 | 30.23 | 25.48 | 23.81 |
| 7700 | 38.88 | 37.16 | 30.19 | 25.48 | 23.82 |
| 7702 | 38.87 | 37.11 | 30.16 | 25.46 | 23.82 |
| 7704 | 38.82 | 37.02 | 30.09 | 25.48 | 23.81 |
| 7706 | 38.76 | 36.89 | 29.97 | 25.55 | 23.81 |
| 7708 | 38.69 | 36.79 | 29.88 | 25.65 | 23.8  |
| 7710 | 38.59 | 36.67 | 29.78 | 25.78 | 23.8  |
| 7712 | 38.43 | 36.54 | 29.66 | 25.91 | 23.78 |
| 7714 | 38.22 | 36.34 | 29.54 | 26.04 | 23.75 |
| 7716 | 38.02 | 36.21 | 29.45 | 26.21 | 23.78 |
| 7718 | 37.8  | 36.09 | 29.38 | 26.31 | 23.76 |
| 7720 | 37.54 | 35.96 | 29.32 | 26.39 | 23.76 |
| 7722 | 37.31 | 35.77 | 29.25 | 26.43 | 23.74 |
| 7724 | 37.12 | 35.63 | 29.19 | 26.48 | 23.73 |
| 7726 | 36.93 | 35.47 | 29.12 | 26.48 | 23.7  |
| 7728 | 36.76 | 35.31 | 29.08 | 26.51 | 23.7  |
| 7730 | 36.63 | 35.18 | 29.01 | 26.52 | 23.67 |
| 7732 | 36.55 | 35.08 | 29    | 26.56 | 23.7  |
| 7734 | 36.41 | 34.91 | 28.9  | 26.52 | 23.64 |

|           |    |       |       |       |       |       |
|-----------|----|-------|-------|-------|-------|-------|
| 80kg440C° | 0  | 22.36 | 21.95 | 22.11 | 22.31 | 21.75 |
|           | 2  | 22.41 | 21.98 | 22.14 | 22.36 | 21.77 |
|           | 4  | 22.38 | 21.97 | 22.14 | 22.37 | 21.77 |
|           | 6  | 22.37 | 21.97 | 22.14 | 22.38 | 21.76 |
|           | 8  | 22.37 | 21.97 | 22.15 | 22.39 | 21.76 |
|           | 10 | 22.36 | 21.97 | 22.15 | 22.4  | 21.76 |
|           | 12 | 22.36 | 21.98 | 22.16 | 22.42 | 21.77 |
|           | 14 | 22.36 | 21.98 | 22.17 | 22.45 | 21.78 |
|           | 16 | 22.37 | 21.99 | 22.18 | 22.48 | 21.78 |
|           | 18 | 22.36 | 22.01 | 22.19 | 22.49 | 21.79 |
|           | 20 | 22.36 | 22.02 | 22.2  | 22.5  | 21.8  |



|     |       |       |       |       |       |
|-----|-------|-------|-------|-------|-------|
| 22  | 22.36 | 22    | 22.2  | 22.5  | 21.79 |
| 24  | 22.37 | 22.01 | 22.22 | 22.53 | 21.8  |
| 26  | 22.38 | 22.03 | 22.24 | 22.56 | 21.82 |
| 28  | 22.38 | 22.03 | 22.25 | 22.56 | 21.82 |
| 30  | 22.39 | 22.05 | 22.27 | 22.58 | 21.84 |
| 32  | 22.39 | 22.04 | 22.26 | 22.58 | 21.83 |
| 34  | 22.39 | 22.05 | 22.28 | 22.6  | 21.83 |
| 36  | 22.38 | 22.04 | 22.26 | 22.59 | 21.83 |
| 38  | 22.41 | 22.05 | 22.28 | 22.62 | 21.85 |
| 40  | 22.43 | 22.07 | 22.31 | 22.64 | 21.86 |
| 42  | 22.48 | 22.11 | 22.34 | 22.68 | 21.88 |
| 44  | 22.48 | 22.11 | 22.35 | 22.7  | 21.9  |
| 46  | 22.53 | 22.14 | 22.37 | 22.74 | 21.93 |
| 48  | 22.52 | 22.11 | 22.35 | 22.7  | 21.88 |
| 50  | 22.52 | 22.09 | 22.34 | 22.7  | 21.88 |
| 52  | 22.52 | 22.09 | 22.34 | 22.71 | 21.88 |
| 54  | 22.57 | 22.12 | 22.37 | 22.74 | 21.89 |
| 56  | 22.57 | 22.12 | 22.36 | 22.74 | 21.88 |
| 58  | 22.59 | 22.11 | 22.37 | 22.75 | 21.89 |
| 60  | 22.6  | 22.11 | 22.38 | 22.77 | 21.9  |
| 62  | 22.62 | 22.12 | 22.38 | 22.78 | 21.89 |
| 64  | 22.66 | 22.13 | 22.39 | 22.79 | 21.9  |
| 66  | 22.69 | 22.13 | 22.4  | 22.8  | 21.9  |
| 68  | 22.69 | 22.12 | 22.38 | 22.77 | 21.87 |
| 70  | 22.72 | 22.12 | 22.41 | 22.8  | 21.9  |
| 72  | 22.78 | 22.14 | 22.42 | 22.82 | 21.92 |
| 74  | 22.82 | 22.15 | 22.43 | 22.83 | 21.92 |
| 76  | 22.87 | 22.17 | 22.45 | 22.84 | 21.93 |
| 78  | 22.92 | 22.2  | 22.48 | 22.88 | 21.95 |
| 80  | 22.93 | 22.16 | 22.45 | 22.87 | 21.94 |
| 82  | 22.96 | 22.16 | 22.45 | 22.87 | 21.93 |
| 84  | 23.01 | 22.16 | 22.45 | 22.87 | 21.93 |
| 86  | 23.04 | 22.16 | 22.46 | 22.87 | 21.94 |
| 88  | 23.08 | 22.17 | 22.46 | 22.89 | 21.94 |
| 90  | 23.12 | 22.16 | 22.46 | 22.9  | 21.93 |
| 92  | 23.17 | 22.16 | 22.47 | 22.9  | 21.93 |
| 94  | 23.25 | 22.19 | 22.5  | 22.95 | 21.96 |
| 96  | 23.33 | 22.23 | 22.54 | 22.98 | 21.99 |
| 98  | 23.36 | 22.23 | 22.53 | 22.98 | 21.98 |
| 100 | 23.44 | 22.23 | 22.54 | 22.98 | 21.98 |
| 102 | 23.51 | 22.23 | 22.53 | 22.99 | 21.98 |
| 104 | 23.58 | 22.26 | 22.57 | 23.02 | 22.01 |
| 106 | 23.61 | 22.23 | 22.53 | 22.99 | 21.99 |
| 108 | 23.69 | 22.26 | 22.57 | 23.03 | 22.01 |

|     |       |       |       |       |       |
|-----|-------|-------|-------|-------|-------|
| 110 | 23.74 | 22.23 | 22.55 | 23.01 | 21.99 |
| 112 | 23.82 | 22.24 | 22.57 | 23.03 | 22.01 |
| 114 | 23.87 | 22.23 | 22.55 | 23.02 | 21.98 |
| 116 | 23.93 | 22.22 | 22.54 | 23.01 | 21.97 |
| 118 | 24.01 | 22.22 | 22.54 | 23    | 21.97 |
| 120 | 24.09 | 22.21 | 22.54 | 23    | 21.96 |
| 122 | 24.21 | 22.25 | 22.58 | 23.04 | 22    |
| 124 | 24.32 | 22.28 | 22.6  | 23.07 | 22.03 |
| 126 | 24.36 | 22.23 | 22.56 | 23.03 | 21.98 |
| 128 | 24.44 | 22.22 | 22.56 | 23.03 | 21.98 |
| 130 | 24.55 | 22.22 | 22.56 | 23.03 | 21.98 |
| 132 | 24.65 | 22.24 | 22.58 | 23.06 | 22    |
| 134 | 24.76 | 22.23 | 22.6  | 23.08 | 22.01 |
| 136 | 24.88 | 22.27 | 22.62 | 23.1  | 22.03 |
| 138 | 24.97 | 22.25 | 22.61 | 23.08 | 22.01 |
| 140 | 25.05 | 22.24 | 22.59 | 23.07 | 21.99 |
| 142 | 25.14 | 22.23 | 22.58 | 23.07 | 21.98 |
| 144 | 25.28 | 22.27 | 22.6  | 23.1  | 22.01 |
| 146 | 25.4  | 22.25 | 22.61 | 23.09 | 22.01 |
| 148 | 25.5  | 22.24 | 22.59 | 23.09 | 21.99 |
| 150 | 25.6  | 22.24 | 22.6  | 23.09 | 21.99 |
| 152 | 25.73 | 22.26 | 22.61 | 23.11 | 22.01 |
| 154 | 25.86 | 22.25 | 22.61 | 23.11 | 21.99 |
| 156 | 26    | 22.26 | 22.62 | 23.11 | 21.99 |
| 158 | 26.11 | 22.26 | 22.62 | 23.12 | 22    |
| 160 | 26.24 | 22.28 | 22.63 | 23.12 | 22    |
| 162 | 26.41 | 22.29 | 22.65 | 23.14 | 22.02 |
| 164 | 26.54 | 22.3  | 22.66 | 23.15 | 22.05 |
| 166 | 26.64 | 22.27 | 22.64 | 23.14 | 22.02 |
| 168 | 26.79 | 22.29 | 22.65 | 23.15 | 22.01 |
| 170 | 26.91 | 22.27 | 22.63 | 23.13 | 22    |
| 172 | 27.07 | 22.27 | 22.64 | 23.14 | 22    |
| 174 | 27.21 | 22.27 | 22.64 | 23.14 | 22    |
| 176 | 27.35 | 22.27 | 22.64 | 23.14 | 22    |
| 178 | 27.49 | 22.27 | 22.65 | 23.15 | 22    |
| 180 | 27.69 | 22.32 | 22.69 | 23.19 | 22.05 |
| 182 | 27.81 | 22.29 | 22.66 | 23.17 | 22.01 |
| 184 | 27.99 | 22.31 | 22.68 | 23.2  | 22.03 |
| 186 | 28.17 | 22.32 | 22.68 | 23.19 | 22.01 |
| 188 | 28.33 | 22.34 | 22.71 | 23.21 | 22.03 |
| 190 | 28.5  | 22.35 | 22.73 | 23.24 | 22.07 |
| 192 | 28.67 | 22.35 | 22.71 | 23.23 | 22.05 |
| 194 | 28.85 | 22.38 | 22.73 | 23.26 | 22.07 |
| 196 | 29.03 | 22.38 | 22.74 | 23.26 | 22.07 |

|     |       |       |       |       |       |
|-----|-------|-------|-------|-------|-------|
| 198 | 29.2  | 22.39 | 22.74 | 23.27 | 22.08 |
| 200 | 29.36 | 22.39 | 22.75 | 23.28 | 22.08 |
| 202 | 29.5  | 22.35 | 22.71 | 23.24 | 22.04 |
| 204 | 29.71 | 22.36 | 22.72 | 23.25 | 22.06 |
| 206 | 29.87 | 22.36 | 22.7  | 23.24 | 22.04 |
| 208 | 30.06 | 22.36 | 22.7  | 23.22 | 22.03 |
| 210 | 30.25 | 22.38 | 22.73 | 23.25 | 22.06 |
| 212 | 30.44 | 22.36 | 22.72 | 23.23 | 22.03 |
| 214 | 30.63 | 22.4  | 22.75 | 23.26 | 22.07 |
| 216 | 30.8  | 22.39 | 22.73 | 23.25 | 22.05 |
| 218 | 30.99 | 22.39 | 22.72 | 23.24 | 22.04 |
| 220 | 31.19 | 22.38 | 22.72 | 23.25 | 22.04 |
| 222 | 31.37 | 22.38 | 22.71 | 23.23 | 22.03 |
| 224 | 31.58 | 22.39 | 22.72 | 23.25 | 22.04 |
| 226 | 31.79 | 22.4  | 22.73 | 23.26 | 22.05 |
| 228 | 32.03 | 22.46 | 22.77 | 23.28 | 22.07 |
| 230 | 32.2  | 22.43 | 22.75 | 23.27 | 22.05 |
| 232 | 32.38 | 22.42 | 22.74 | 23.27 | 22.03 |
| 234 | 32.61 | 22.43 | 22.73 | 23.27 | 22.03 |
| 236 | 32.81 | 22.43 | 22.73 | 23.27 | 22.03 |
| 238 | 33.02 | 22.44 | 22.74 | 23.28 | 22.03 |
| 240 | 33.22 | 22.46 | 22.75 | 23.28 | 22.03 |
| 242 | 33.46 | 22.47 | 22.75 | 23.28 | 22.04 |
| 244 | 33.68 | 22.48 | 22.74 | 23.28 | 22.04 |
| 246 | 33.89 | 22.5  | 22.76 | 23.29 | 22.04 |
| 248 | 34.11 | 22.5  | 22.76 | 23.3  | 22.05 |
| 250 | 34.35 | 22.54 | 22.79 | 23.33 | 22.08 |
| 252 | 34.58 | 22.54 | 22.79 | 23.33 | 22.08 |
| 254 | 34.8  | 22.54 | 22.79 | 23.34 | 22.07 |
| 256 | 35.06 | 22.59 | 22.81 | 23.35 | 22.09 |
| 258 | 35.23 | 22.55 | 22.77 | 23.31 | 22.06 |
| 260 | 35.5  | 22.6  | 22.81 | 23.35 | 22.08 |
| 262 | 35.72 | 22.61 | 22.8  | 23.35 | 22.06 |
| 264 | 35.92 | 22.59 | 22.79 | 23.33 | 22.04 |
| 266 | 36.15 | 22.58 | 22.75 | 23.3  | 22.03 |
| 268 | 36.41 | 22.63 | 22.81 | 23.35 | 22.08 |
| 270 | 36.65 | 22.65 | 22.81 | 23.37 | 22.08 |
| 272 | 36.87 | 22.66 | 22.81 | 23.36 | 22.07 |
| 274 | 37.15 | 22.68 | 22.82 | 23.38 | 22.09 |
| 276 | 37.38 | 22.7  | 22.82 | 23.38 | 22.09 |
| 278 | 37.6  | 22.7  | 22.81 | 23.36 | 22.07 |
| 280 | 37.83 | 22.72 | 22.82 | 23.38 | 22.08 |
| 282 | 38.05 | 22.73 | 22.81 | 23.36 | 22.06 |
| 284 | 38.3  | 22.73 | 22.81 | 23.36 | 22.07 |

|     |       |       |       |       |       |
|-----|-------|-------|-------|-------|-------|
| 286 | 38.53 | 22.74 | 22.8  | 23.34 | 22.05 |
| 288 | 38.77 | 22.75 | 22.8  | 23.34 | 22.06 |
| 290 | 39.09 | 22.81 | 22.85 | 23.38 | 22.11 |
| 292 | 39.32 | 22.82 | 22.83 | 23.38 | 22.1  |
| 294 | 39.54 | 22.82 | 22.82 | 23.35 | 22.07 |
| 296 | 39.77 | 22.84 | 22.83 | 23.36 | 22.07 |
| 298 | 40.05 | 22.85 | 22.82 | 23.35 | 22.06 |
| 300 | 40.32 | 22.9  | 22.83 | 23.37 | 22.08 |
| 302 | 40.55 | 22.91 | 22.83 | 23.37 | 22.08 |
| 304 | 40.8  | 22.91 | 22.82 | 23.35 | 22.05 |
| 306 | 41.01 | 22.92 | 22.82 | 23.36 | 22.06 |
| 308 | 41.34 | 23    | 22.86 | 23.41 | 22.11 |
| 310 | 41.6  | 23.03 | 22.89 | 23.42 | 22.1  |
| 312 | 41.85 | 23.07 | 22.9  | 23.44 | 22.13 |
| 314 | 42.15 | 23.09 | 22.9  | 23.45 | 22.13 |
| 316 | 42.39 | 23.12 | 22.9  | 23.45 | 22.13 |
| 318 | 42.61 | 23.11 | 22.87 | 23.41 | 22.09 |
| 320 | 42.87 | 23.16 | 22.9  | 23.44 | 22.12 |
| 322 | 43.16 | 23.18 | 22.89 | 23.43 | 22.12 |
| 324 | 43.43 | 23.22 | 22.9  | 23.44 | 22.14 |
| 326 | 43.65 | 23.22 | 22.88 | 23.41 | 22.1  |
| 328 | 43.91 | 23.26 | 22.89 | 23.42 | 22.12 |
| 330 | 44.17 | 23.24 | 22.87 | 23.39 | 22.08 |
| 332 | 44.46 | 23.31 | 22.92 | 23.43 | 22.12 |
| 334 | 44.69 | 23.31 | 22.88 | 23.4  | 22.1  |
| 336 | 44.97 | 23.37 | 22.91 | 23.43 | 22.11 |
| 338 | 45.28 | 23.41 | 22.91 | 23.44 | 22.12 |
| 340 | 45.53 | 23.45 | 22.93 | 23.46 | 22.13 |
| 342 | 45.79 | 23.48 | 22.94 | 23.47 | 22.14 |
| 344 | 46.03 | 23.5  | 22.93 | 23.46 | 22.13 |
| 346 | 46.32 | 23.51 | 22.9  | 23.42 | 22.09 |
| 348 | 46.61 | 23.57 | 22.93 | 23.45 | 22.12 |
| 350 | 46.85 | 23.58 | 22.92 | 23.44 | 22.1  |
| 352 | 47.09 | 23.61 | 22.92 | 23.42 | 22.1  |
| 354 | 47.4  | 23.67 | 22.94 | 23.46 | 22.13 |
| 356 | 47.68 | 23.73 | 22.96 | 23.48 | 22.16 |
| 358 | 47.93 | 23.76 | 22.96 | 23.47 | 22.16 |
| 360 | 48.2  | 23.8  | 22.97 | 23.48 | 22.16 |
| 362 | 48.51 | 23.84 | 22.97 | 23.49 | 22.16 |
| 364 | 48.75 | 23.86 | 22.97 | 23.48 | 22.15 |
| 366 | 49.02 | 23.92 | 22.98 | 23.49 | 22.16 |
| 368 | 49.31 | 23.96 | 22.99 | 23.51 | 22.17 |
| 370 | 49.62 | 24    | 22.99 | 23.5  | 22.17 |
| 372 | 49.88 | 24.05 | 23    | 23.51 | 22.17 |

|     |       |       |       |       |       |
|-----|-------|-------|-------|-------|-------|
| 374 | 50.15 | 24.09 | 23    | 23.51 | 22.17 |
| 376 | 50.41 | 24.14 | 23    | 23.51 | 22.17 |
| 378 | 50.72 | 24.17 | 22.99 | 23.51 | 22.17 |
| 380 | 50.95 | 24.18 | 22.96 | 23.48 | 22.13 |
| 382 | 51.19 | 24.19 | 22.94 | 23.45 | 22.11 |
| 384 | 51.46 | 24.25 | 22.96 | 23.46 | 22.11 |
| 386 | 51.76 | 24.32 | 22.98 | 23.48 | 22.14 |
| 388 | 52.05 | 24.37 | 22.98 | 23.46 | 22.13 |
| 390 | 52.31 | 24.39 | 22.97 | 23.45 | 22.12 |
| 392 | 52.6  | 24.45 | 22.98 | 23.46 | 22.13 |
| 394 | 52.91 | 24.51 | 22.99 | 23.48 | 22.14 |
| 396 | 53.18 | 24.57 | 23    | 23.48 | 22.14 |
| 398 | 53.48 | 24.63 | 23.02 | 23.5  | 22.16 |
| 400 | 53.76 | 24.69 | 23.03 | 23.49 | 22.15 |
| 402 | 54.04 | 24.75 | 23.04 | 23.52 | 22.18 |
| 404 | 54.32 | 24.78 | 23.01 | 23.48 | 22.14 |
| 406 | 54.63 | 24.88 | 23.07 | 23.54 | 22.18 |
| 408 | 54.91 | 24.94 | 23.08 | 23.55 | 22.19 |
| 410 | 55.22 | 25    | 23.09 | 23.56 | 22.18 |
| 412 | 55.46 | 25.02 | 23.04 | 23.5  | 22.13 |
| 414 | 55.78 | 25.09 | 23.08 | 23.54 | 22.19 |
| 416 | 56.04 | 25.13 | 23.07 | 23.54 | 22.18 |
| 418 | 56.38 | 25.23 | 23.11 | 23.55 | 22.2  |
| 420 | 56.66 | 25.29 | 23.12 | 23.55 | 22.2  |
| 422 | 56.93 | 25.34 | 23.12 | 23.55 | 22.2  |
| 424 | 57.2  | 25.4  | 23.12 | 23.55 | 22.21 |
| 426 | 57.52 | 25.47 | 23.13 | 23.56 | 22.21 |
| 428 | 57.78 | 25.51 | 23.13 | 23.56 | 22.19 |
| 430 | 58.06 | 25.58 | 23.13 | 23.55 | 22.18 |
| 432 | 58.35 | 25.66 | 23.15 | 23.57 | 22.22 |
| 434 | 58.67 | 25.71 | 23.14 | 23.55 | 22.21 |
| 436 | 58.97 | 25.8  | 23.17 | 23.58 | 22.22 |
| 438 | 59.24 | 25.85 | 23.15 | 23.57 | 22.2  |
| 440 | 59.52 | 25.92 | 23.16 | 23.57 | 22.21 |
| 442 | 59.77 | 25.96 | 23.15 | 23.55 | 22.18 |
| 444 | 60.11 | 26.05 | 23.18 | 23.58 | 22.2  |
| 446 | 60.37 | 26.1  | 23.18 | 23.55 | 22.18 |
| 448 | 60.66 | 26.19 | 23.18 | 23.57 | 22.19 |
| 450 | 60.96 | 26.25 | 23.19 | 23.56 | 22.19 |
| 452 | 61.23 | 26.32 | 23.18 | 23.54 | 22.17 |
| 454 | 61.51 | 26.39 | 23.18 | 23.53 | 22.17 |
| 456 | 61.8  | 26.46 | 23.18 | 23.54 | 22.18 |
| 458 | 62.13 | 26.54 | 23.19 | 23.54 | 22.18 |
| 460 | 62.4  | 26.63 | 23.2  | 23.55 | 22.18 |

|     |       |       |       |       |       |
|-----|-------|-------|-------|-------|-------|
| 462 | 62.69 | 26.72 | 23.23 | 23.56 | 22.2  |
| 464 | 62.97 | 26.8  | 23.25 | 23.57 | 22.2  |
| 466 | 63.31 | 26.91 | 23.28 | 23.59 | 22.22 |
| 468 | 63.58 | 26.96 | 23.25 | 23.57 | 22.2  |
| 470 | 63.84 | 27.02 | 23.25 | 23.57 | 22.18 |
| 472 | 64.14 | 27.12 | 23.27 | 23.58 | 22.19 |
| 474 | 64.42 | 27.21 | 23.28 | 23.58 | 22.2  |
| 476 | 64.74 | 27.3  | 23.29 | 23.58 | 22.2  |
| 478 | 65.03 | 27.38 | 23.31 | 23.59 | 22.21 |
| 480 | 65.34 | 27.49 | 23.33 | 23.62 | 22.23 |
| 482 | 65.59 | 27.54 | 23.32 | 23.59 | 22.19 |
| 484 | 65.92 | 27.64 | 23.34 | 23.59 | 22.21 |
| 486 | 66.21 | 27.73 | 23.35 | 23.59 | 22.21 |
| 488 | 66.48 | 27.82 | 23.36 | 23.58 | 22.22 |
| 490 | 66.8  | 27.91 | 23.35 | 23.57 | 22.19 |
| 492 | 67.1  | 28    | 23.38 | 23.59 | 22.21 |
| 494 | 67.37 | 28.07 | 23.38 | 23.59 | 22.2  |
| 496 | 67.67 | 28.18 | 23.4  | 23.6  | 22.22 |
| 498 | 68    | 28.29 | 23.41 | 23.6  | 22.23 |
| 500 | 68.28 | 28.37 | 23.43 | 23.61 | 22.23 |
| 502 | 68.57 | 28.46 | 23.44 | 23.61 | 22.23 |
| 504 | 68.84 | 28.55 | 23.45 | 23.62 | 22.23 |
| 506 | 69.18 | 28.69 | 23.51 | 23.66 | 22.27 |
| 508 | 69.51 | 28.8  | 23.53 | 23.67 | 22.28 |
| 510 | 69.77 | 28.87 | 23.51 | 23.65 | 22.25 |
| 512 | 70.05 | 28.95 | 23.51 | 23.64 | 22.24 |
| 514 | 70.37 | 29.05 | 23.53 | 23.64 | 22.24 |
| 516 | 70.65 | 29.15 | 23.54 | 23.64 | 22.25 |
| 518 | 70.93 | 29.25 | 23.56 | 23.64 | 22.25 |
| 520 | 71.21 | 29.34 | 23.56 | 23.63 | 22.23 |
| 522 | 71.49 | 29.43 | 23.57 | 23.63 | 22.24 |
| 524 | 71.84 | 29.58 | 23.6  | 23.66 | 22.25 |
| 526 | 72.12 | 29.67 | 23.62 | 23.68 | 22.27 |
| 528 | 72.42 | 29.77 | 23.63 | 23.67 | 22.27 |
| 530 | 72.73 | 29.87 | 23.65 | 23.68 | 22.27 |
| 532 | 73.05 | 30.04 | 23.71 | 23.72 | 22.32 |
| 534 | 73.29 | 30.09 | 23.68 | 23.66 | 22.27 |
| 536 | 73.59 | 30.2  | 23.71 | 23.68 | 22.29 |
| 538 | 73.91 | 30.28 | 23.7  | 23.66 | 22.28 |
| 540 | 74.21 | 30.42 | 23.74 | 23.67 | 22.29 |
| 542 | 74.48 | 30.5  | 23.75 | 23.68 | 22.28 |
| 544 | 74.79 | 30.64 | 23.8  | 23.72 | 22.33 |
| 546 | 75.1  | 30.72 | 23.79 | 23.7  | 22.3  |
| 548 | 75.43 | 30.85 | 23.84 | 23.72 | 22.33 |

|     |       |       |       |       |       |
|-----|-------|-------|-------|-------|-------|
| 550 | 75.69 | 30.93 | 23.83 | 23.7  | 22.31 |
| 552 | 75.98 | 31.04 | 23.85 | 23.71 | 22.3  |
| 554 | 76.24 | 31.13 | 23.85 | 23.71 | 22.3  |
| 556 | 76.58 | 31.27 | 23.89 | 23.72 | 22.31 |
| 558 | 76.89 | 31.38 | 23.92 | 23.74 | 22.33 |
| 560 | 77.16 | 31.47 | 23.93 | 23.73 | 22.32 |
| 562 | 77.47 | 31.56 | 23.93 | 23.72 | 22.3  |
| 564 | 77.76 | 31.68 | 23.96 | 23.72 | 22.31 |
| 566 | 78.03 | 31.78 | 23.97 | 23.72 | 22.3  |
| 568 | 78.33 | 31.88 | 24    | 23.73 | 22.32 |
| 570 | 78.68 | 32    | 24.02 | 23.75 | 22.34 |
| 572 | 78.96 | 32.12 | 24.04 | 23.73 | 22.32 |
| 574 | 79.25 | 32.23 | 24.08 | 23.75 | 22.36 |
| 576 | 79.52 | 32.32 | 24.08 | 23.73 | 22.33 |
| 578 | 79.89 | 32.48 | 24.12 | 23.77 | 22.37 |
| 580 | 80.2  | 32.61 | 24.18 | 23.8  | 22.4  |
| 582 | 80.46 | 32.7  | 24.18 | 23.78 | 22.38 |
| 584 | 80.77 | 32.82 | 24.22 | 23.81 | 22.4  |
| 586 | 81.06 | 32.92 | 24.24 | 23.81 | 22.4  |
| 588 | 81.36 | 33.02 | 24.24 | 23.78 | 22.37 |
| 590 | 81.65 | 33.12 | 24.27 | 23.81 | 22.38 |
| 592 | 81.92 | 33.21 | 24.27 | 23.79 | 22.37 |
| 594 | 82.25 | 33.37 | 24.34 | 23.84 | 22.42 |
| 596 | 82.6  | 33.49 | 24.36 | 23.84 | 22.41 |
| 598 | 82.88 | 33.61 | 24.39 | 23.85 | 22.41 |
| 600 | 83.16 | 33.7  | 24.39 | 23.83 | 22.4  |
| 602 | 83.45 | 33.77 | 24.38 | 23.81 | 22.38 |
| 604 | 83.74 | 33.91 | 24.42 | 23.83 | 22.39 |
| 606 | 84.02 | 34.02 | 24.46 | 23.83 | 22.41 |
| 608 | 84.3  | 34.11 | 24.46 | 23.82 | 22.39 |
| 610 | 84.63 | 34.21 | 24.49 | 23.81 | 22.39 |
| 612 | 84.93 | 34.33 | 24.51 | 23.82 | 22.39 |
| 614 | 85.21 | 34.44 | 24.54 | 23.82 | 22.4  |
| 616 | 85.5  | 34.56 | 24.58 | 23.84 | 22.42 |
| 618 | 85.83 | 34.69 | 24.62 | 23.86 | 22.43 |
| 620 | 86.12 | 34.81 | 24.65 | 23.86 | 22.45 |
| 622 | 86.41 | 34.9  | 24.66 | 23.86 | 22.42 |
| 624 | 86.7  | 35    | 24.68 | 23.86 | 22.42 |
| 626 | 87.04 | 35.12 | 24.71 | 23.86 | 22.43 |
| 628 | 87.32 | 35.23 | 24.73 | 23.87 | 22.43 |
| 630 | 87.61 | 35.33 | 24.76 | 23.88 | 22.43 |
| 632 | 87.9  | 35.44 | 24.79 | 23.88 | 22.44 |
| 634 | 88.23 | 35.56 | 24.82 | 23.89 | 22.44 |
| 636 | 88.52 | 35.66 | 24.86 | 23.89 | 22.44 |

|     |        |       |       |       |       |
|-----|--------|-------|-------|-------|-------|
| 638 | 88.81  | 35.77 | 24.89 | 23.89 | 22.45 |
| 640 | 89.1   | 35.88 | 24.93 | 23.9  | 22.47 |
| 642 | 89.39  | 36    | 24.96 | 23.91 | 22.47 |
| 644 | 89.7   | 36.09 | 24.97 | 23.9  | 22.46 |
| 646 | 89.99  | 36.19 | 25    | 23.9  | 22.46 |
| 648 | 90.28  | 36.3  | 25.03 | 23.91 | 22.46 |
| 650 | 90.62  | 36.4  | 25.06 | 23.91 | 22.47 |
| 652 | 90.91  | 36.52 | 25.09 | 23.92 | 22.47 |
| 654 | 91.2   | 36.63 | 25.13 | 23.93 | 22.47 |
| 656 | 91.48  | 36.73 | 25.16 | 23.95 | 22.48 |
| 658 | 91.81  | 36.83 | 25.19 | 23.95 | 22.48 |
| 660 | 92.09  | 36.95 | 25.21 | 23.95 | 22.49 |
| 662 | 92.38  | 37.06 | 25.25 | 23.96 | 22.49 |
| 664 | 92.67  | 37.16 | 25.28 | 23.97 | 22.5  |
| 666 | 93     | 37.23 | 25.29 | 23.95 | 22.48 |
| 668 | 93.3   | 37.37 | 25.34 | 23.97 | 22.5  |
| 670 | 93.57  | 37.45 | 25.35 | 23.95 | 22.49 |
| 672 | 93.81  | 37.52 | 25.35 | 23.91 | 22.46 |
| 674 | 94.19  | 37.65 | 25.42 | 23.96 | 22.5  |
| 676 | 94.5   | 37.78 | 25.47 | 23.99 | 22.52 |
| 678 | 94.77  | 37.87 | 25.48 | 23.96 | 22.49 |
| 680 | 95.03  | 37.95 | 25.5  | 23.96 | 22.48 |
| 682 | 95.38  | 38.06 | 25.54 | 23.96 | 22.5  |
| 684 | 95.65  | 38.14 | 25.56 | 23.96 | 22.48 |
| 686 | 95.98  | 38.3  | 25.64 | 24.02 | 22.53 |
| 688 | 96.29  | 38.42 | 25.69 | 24.04 | 22.54 |
| 690 | 96.57  | 38.49 | 25.71 | 24.03 | 22.53 |
| 692 | 96.88  | 38.59 | 25.73 | 24.03 | 22.51 |
| 694 | 97.19  | 38.7  | 25.76 | 24.02 | 22.52 |
| 696 | 97.47  | 38.81 | 25.81 | 24.04 | 22.53 |
| 698 | 97.79  | 38.9  | 25.86 | 24.07 | 22.55 |
| 700 | 98.1   | 38.99 | 25.87 | 24.06 | 22.54 |
| 702 | 98.42  | 39.12 | 25.94 | 24.08 | 22.57 |
| 704 | 98.74  | 39.24 | 26    | 24.11 | 22.6  |
| 706 | 98.99  | 39.31 | 26.01 | 24.09 | 22.58 |
| 708 | 99.34  | 39.43 | 26.06 | 24.1  | 22.59 |
| 710 | 99.65  | 39.52 | 26.1  | 24.1  | 22.6  |
| 712 | 99.93  | 39.61 | 26.13 | 24.11 | 22.6  |
| 714 | 100.25 | 39.7  | 26.17 | 24.12 | 22.59 |
| 716 | 100.5  | 39.76 | 26.16 | 24.06 | 22.55 |
| 718 | 100.81 | 39.87 | 26.22 | 24.1  | 22.58 |
| 720 | 101.15 | 40    | 26.3  | 24.14 | 22.62 |
| 722 | 101.5  | 40.12 | 26.34 | 24.16 | 22.62 |
| 724 | 101.79 | 40.21 | 26.38 | 24.18 | 22.63 |



|     |        |       |       |       |       |
|-----|--------|-------|-------|-------|-------|
| 726 | 102.08 | 40.3  | 26.42 | 24.18 | 22.63 |
| 728 | 102.36 | 40.4  | 26.46 | 24.19 | 22.63 |
| 730 | 102.66 | 40.49 | 26.5  | 24.2  | 22.64 |
| 732 | 103.01 | 40.59 | 26.55 | 24.2  | 22.65 |
| 734 | 103.3  | 40.67 | 26.58 | 24.2  | 22.63 |
| 736 | 103.55 | 40.72 | 26.6  | 24.18 | 22.61 |
| 738 | 103.92 | 40.85 | 26.65 | 24.21 | 22.65 |
| 740 | 104.23 | 40.95 | 26.71 | 24.23 | 22.66 |
| 742 | 104.53 | 41.04 | 26.76 | 24.23 | 22.67 |
| 744 | 104.82 | 41.13 | 26.8  | 24.24 | 22.68 |
| 746 | 105.12 | 41.22 | 26.84 | 24.26 | 22.68 |
| 748 | 105.47 | 41.32 | 26.88 | 24.26 | 22.69 |
| 750 | 105.76 | 41.4  | 26.93 | 24.27 | 22.69 |
| 752 | 106.06 | 41.49 | 26.97 | 24.27 | 22.7  |
| 754 | 106.39 | 41.56 | 26.99 | 24.26 | 22.68 |
| 756 | 106.69 | 41.66 | 27.04 | 24.28 | 22.7  |
| 758 | 106.99 | 41.73 | 27.06 | 24.26 | 22.67 |
| 760 | 107.28 | 41.81 | 27.1  | 24.27 | 22.69 |
| 762 | 107.63 | 41.92 | 27.17 | 24.29 | 22.7  |
| 764 | 107.92 | 42.01 | 27.21 | 24.3  | 22.71 |
| 766 | 108.21 | 42.09 | 27.25 | 24.29 | 22.71 |
| 768 | 108.49 | 42.16 | 27.29 | 24.32 | 22.72 |
| 770 | 108.85 | 42.26 | 27.32 | 24.31 | 22.7  |
| 772 | 109.17 | 42.36 | 27.4  | 24.32 | 22.71 |
| 774 | 109.44 | 42.42 | 27.41 | 24.32 | 22.7  |
| 776 | 109.75 | 42.5  | 27.45 | 24.34 | 22.7  |
| 778 | 110.1  | 42.59 | 27.48 | 24.34 | 22.7  |
| 780 | 110.43 | 42.71 | 27.57 | 24.39 | 22.74 |
| 782 | 110.71 | 42.78 | 27.6  | 24.37 | 22.74 |
| 784 | 111.04 | 42.87 | 27.67 | 24.42 | 22.78 |
| 786 | 111.32 | 42.93 | 27.69 | 24.4  | 22.75 |
| 788 | 111.67 | 43.02 | 27.74 | 24.41 | 22.75 |
| 790 | 111.98 | 43.11 | 27.81 | 24.43 | 22.78 |
| 792 | 112.27 | 43.17 | 27.82 | 24.42 | 22.76 |
| 794 | 112.65 | 43.29 | 27.9  | 24.44 | 22.8  |
| 796 | 112.94 | 43.34 | 27.92 | 24.44 | 22.79 |
| 798 | 113.25 | 43.44 | 27.99 | 24.47 | 22.81 |
| 800 | 113.61 | 43.57 | 28.08 | 24.51 | 22.85 |
| 802 | 113.93 | 43.64 | 28.1  | 24.5  | 22.84 |
| 804 | 114.24 | 43.71 | 28.15 | 24.5  | 22.84 |
| 806 | 114.55 | 43.78 | 28.19 | 24.52 | 22.84 |
| 808 | 114.84 | 43.84 | 28.22 | 24.51 | 22.82 |
| 810 | 115.19 | 43.91 | 28.26 | 24.51 | 22.82 |
| 812 | 115.53 | 44.02 | 28.34 | 24.55 | 22.86 |

|     |        |       |       |       |       |
|-----|--------|-------|-------|-------|-------|
| 814 | 115.84 | 44.09 | 28.39 | 24.57 | 22.87 |
| 816 | 116.15 | 44.18 | 28.43 | 24.57 | 22.87 |
| 818 | 116.45 | 44.25 | 28.49 | 24.59 | 22.88 |
| 820 | 116.8  | 44.32 | 28.51 | 24.58 | 22.86 |
| 822 | 117.1  | 44.38 | 28.56 | 24.6  | 22.88 |
| 824 | 117.41 | 44.46 | 28.6  | 24.6  | 22.86 |
| 826 | 117.79 | 44.56 | 28.67 | 24.65 | 22.91 |
| 828 | 118.11 | 44.64 | 28.72 | 24.64 | 22.89 |
| 830 | 118.4  | 44.69 | 28.75 | 24.65 | 22.88 |
| 832 | 118.73 | 44.78 | 28.82 | 24.68 | 22.91 |
| 834 | 119.09 | 44.87 | 28.86 | 24.7  | 22.92 |
| 836 | 119.4  | 44.94 | 28.92 | 24.7  | 22.93 |
| 838 | 119.71 | 45.01 | 28.97 | 24.71 | 22.94 |
| 840 | 120.01 | 45.08 | 29.02 | 24.72 | 22.95 |
| 842 | 120.32 | 45.14 | 29.05 | 24.72 | 22.94 |
| 844 | 120.69 | 45.21 | 29.1  | 24.72 | 22.95 |
| 846 | 120.97 | 45.26 | 29.11 | 24.7  | 22.91 |
| 848 | 121.3  | 45.33 | 29.18 | 24.72 | 22.94 |
| 850 | 121.58 | 45.38 | 29.21 | 24.72 | 22.92 |
| 852 | 121.94 | 45.46 | 29.27 | 24.73 | 22.93 |
| 854 | 122.28 | 45.55 | 29.35 | 24.77 | 22.97 |
| 856 | 122.61 | 45.63 | 29.41 | 24.79 | 22.99 |
| 858 | 122.97 | 45.72 | 29.45 | 24.8  | 22.99 |
| 860 | 123.25 | 45.73 | 29.46 | 24.77 | 22.95 |
| 862 | 123.59 | 45.83 | 29.54 | 24.82 | 22.99 |
| 864 | 123.93 | 45.91 | 29.61 | 24.84 | 23    |
| 866 | 124.32 | 46    | 29.68 | 24.88 | 23.02 |
| 868 | 124.63 | 46.06 | 29.73 | 24.89 | 23.03 |
| 870 | 124.96 | 46.13 | 29.77 | 24.9  | 23.03 |
| 872 | 125.29 | 46.2  | 29.82 | 24.92 | 23.04 |
| 874 | 125.64 | 46.24 | 29.86 | 24.92 | 23.04 |
| 876 | 125.98 | 46.35 | 29.95 | 24.96 | 23.07 |
| 878 | 126.29 | 46.39 | 29.97 | 24.95 | 23.06 |
| 880 | 126.63 | 46.47 | 30.04 | 24.98 | 23.08 |
| 882 | 126.97 | 46.5  | 30.04 | 24.94 | 23.04 |
| 884 | 127.31 | 46.58 | 30.09 | 24.95 | 23.05 |
| 886 | 127.61 | 46.61 | 30.14 | 24.95 | 23.05 |
| 888 | 127.94 | 46.68 | 30.19 | 24.96 | 23.06 |
| 890 | 128.32 | 46.77 | 30.26 | 25    | 23.09 |
| 892 | 128.61 | 46.81 | 30.29 | 24.99 | 23.07 |
| 894 | 128.95 | 46.88 | 30.35 | 25.02 | 23.1  |
| 896 | 129.28 | 46.93 | 30.39 | 25.02 | 23.08 |
| 898 | 129.62 | 47    | 30.43 | 25.03 | 23.09 |
| 900 | 130.02 | 47.08 | 30.52 | 25.08 | 23.1  |

|     |        |       |       |       |       |
|-----|--------|-------|-------|-------|-------|
| 902 | 130.39 | 47.17 | 30.6  | 25.11 | 23.14 |
| 904 | 130.69 | 47.19 | 30.6  | 25.09 | 23.11 |
| 906 | 131.04 | 47.24 | 30.64 | 25.09 | 23.12 |
| 908 | 131.37 | 47.31 | 30.69 | 25.11 | 23.12 |
| 910 | 131.69 | 47.37 | 30.75 | 25.13 | 23.13 |
| 912 | 132.03 | 47.43 | 30.81 | 25.15 | 23.15 |
| 914 | 132.44 | 47.51 | 30.86 | 25.18 | 23.15 |
| 916 | 132.79 | 47.58 | 30.93 | 25.18 | 23.17 |
| 918 | 133.12 | 47.61 | 30.95 | 25.17 | 23.17 |
| 920 | 133.39 | 47.62 | 30.95 | 25.14 | 23.13 |
| 922 | 133.81 | 47.73 | 31.04 | 25.19 | 23.17 |
| 924 | 134.15 | 47.78 | 31.11 | 25.21 | 23.18 |
| 926 | 134.48 | 47.84 | 31.16 | 25.22 | 23.19 |
| 928 | 134.79 | 47.88 | 31.19 | 25.22 | 23.19 |
| 930 | 135.13 | 47.96 | 31.25 | 25.25 | 23.2  |
| 932 | 135.54 | 48.02 | 31.32 | 25.28 | 23.21 |
| 934 | 135.87 | 48.07 | 31.36 | 25.28 | 23.22 |
| 936 | 136.21 | 48.13 | 31.41 | 25.3  | 23.22 |
| 938 | 136.62 | 48.22 | 31.49 | 25.34 | 23.25 |
| 940 | 136.91 | 48.22 | 31.49 | 25.3  | 23.22 |
| 942 | 137.26 | 48.3  | 31.57 | 25.34 | 23.24 |
| 944 | 137.61 | 48.37 | 31.63 | 25.36 | 23.26 |
| 946 | 138.01 | 48.43 | 31.67 | 25.38 | 23.26 |
| 948 | 138.33 | 48.48 | 31.73 | 25.4  | 23.27 |
| 950 | 138.67 | 48.53 | 31.77 | 25.41 | 23.27 |
| 952 | 139.01 | 48.59 | 31.82 | 25.43 | 23.28 |
| 954 | 139.41 | 48.65 | 31.87 | 25.44 | 23.29 |
| 956 | 139.75 | 48.71 | 31.94 | 25.47 | 23.31 |
| 958 | 140.08 | 48.76 | 31.98 | 25.47 | 23.31 |
| 960 | 140.45 | 48.84 | 32.05 | 25.51 | 23.34 |
| 962 | 140.83 | 48.88 | 32.09 | 25.51 | 23.33 |
| 964 | 141.18 | 48.94 | 32.14 | 25.53 | 23.33 |
| 966 | 141.54 | 49    | 32.2  | 25.56 | 23.34 |
| 968 | 141.9  | 49.06 | 32.24 | 25.57 | 23.35 |
| 970 | 142.3  | 49.09 | 32.29 | 25.58 | 23.35 |
| 972 | 142.64 | 49.17 | 32.35 | 25.62 | 23.39 |
| 974 | 142.95 | 49.2  | 32.4  | 25.61 | 23.37 |
| 976 | 143.29 | 49.24 | 32.45 | 25.62 | 23.38 |
| 978 | 143.7  | 49.3  | 32.49 | 25.64 | 23.38 |
| 980 | 144.04 | 49.36 | 32.55 | 25.65 | 23.39 |
| 982 | 144.38 | 49.4  | 32.6  | 25.68 | 23.4  |
| 984 | 144.73 | 49.46 | 32.65 | 25.69 | 23.4  |
| 986 | 145.12 | 49.51 | 32.69 | 25.71 | 23.41 |
| 988 | 145.48 | 49.56 | 32.75 | 25.72 | 23.42 |

|      |        |       |       |       |       |
|------|--------|-------|-------|-------|-------|
| 990  | 145.8  | 49.6  | 32.8  | 25.73 | 23.42 |
| 992  | 146.17 | 49.67 | 32.86 | 25.77 | 23.44 |
| 994  | 146.58 | 49.73 | 32.91 | 25.79 | 23.45 |
| 996  | 146.93 | 49.78 | 32.96 | 25.81 | 23.46 |
| 998  | 147.27 | 49.83 | 33.01 | 25.83 | 23.47 |
| 1000 | 147.62 | 49.88 | 33.06 | 25.84 | 23.48 |
| 1002 | 147.98 | 49.89 | 33.07 | 25.82 | 23.44 |
| 1004 | 148.36 | 49.96 | 33.17 | 25.86 | 23.47 |
| 1006 | 148.74 | 50.03 | 33.22 | 25.9  | 23.5  |
| 1008 | 149.12 | 50.1  | 33.31 | 25.95 | 23.56 |
| 1010 | 149.55 | 50.18 | 33.37 | 25.96 | 23.57 |
| 1012 | 149.89 | 50.21 | 33.43 | 25.99 | 23.59 |
| 1014 | 150.21 | 50.25 | 33.47 | 25.98 | 23.57 |
| 1016 | 150.54 | 50.29 | 33.51 | 26    | 23.57 |
| 1018 | 150.93 | 50.33 | 33.54 | 25.99 | 23.56 |
| 1020 | 151.29 | 50.38 | 33.59 | 26.01 | 23.57 |
| 1022 | 151.65 | 50.42 | 33.64 | 26.03 | 23.58 |
| 1024 | 152.01 | 50.48 | 33.7  | 26.06 | 23.59 |
| 1026 | 152.4  | 50.52 | 33.74 | 26.08 | 23.59 |
| 1028 | 152.77 | 50.58 | 33.81 | 26.11 | 23.6  |
| 1030 | 153.16 | 50.67 | 33.9  | 26.16 | 23.64 |
| 1032 | 153.51 | 50.71 | 33.95 | 26.19 | 23.66 |
| 1034 | 153.94 | 50.77 | 34.02 | 26.22 | 23.69 |
| 1036 | 154.26 | 50.78 | 34.04 | 26.21 | 23.67 |
| 1038 | 154.63 | 50.82 | 34.07 | 26.22 | 23.67 |
| 1040 | 154.96 | 50.85 | 34.11 | 26.22 | 23.67 |
| 1042 | 155.3  | 50.89 | 34.15 | 26.23 | 23.67 |
| 1044 | 155.74 | 50.98 | 34.25 | 26.28 | 23.72 |
| 1046 | 156.07 | 51.02 | 34.29 | 26.29 | 23.71 |
| 1048 | 156.46 | 51.09 | 34.36 | 26.34 | 23.76 |
| 1050 | 156.83 | 51.1  | 34.38 | 26.33 | 23.73 |
| 1052 | 157.19 | 51.14 | 34.44 | 26.35 | 23.73 |
| 1054 | 157.6  | 51.23 | 34.52 | 26.41 | 23.78 |
| 1056 | 157.93 | 51.26 | 34.55 | 26.41 | 23.77 |
| 1058 | 158.36 | 51.33 | 34.61 | 26.45 | 23.79 |
| 1060 | 158.7  | 51.36 | 34.65 | 26.46 | 23.78 |
| 1062 | 159.03 | 51.37 | 34.67 | 26.46 | 23.76 |
| 1064 | 159.41 | 51.43 | 34.74 | 26.5  | 23.79 |
| 1066 | 159.82 | 51.46 | 34.77 | 26.49 | 23.79 |
| 1068 | 160.18 | 51.51 | 34.83 | 26.5  | 23.78 |
| 1070 | 160.56 | 51.57 | 34.89 | 26.55 | 23.81 |
| 1072 | 160.89 | 51.59 | 34.92 | 26.57 | 23.81 |
| 1074 | 161.32 | 51.66 | 35    | 26.61 | 23.85 |
| 1076 | 161.68 | 51.69 | 35.04 | 26.62 | 23.85 |

|      |        |       |       |       |       |
|------|--------|-------|-------|-------|-------|
| 1078 | 162.06 | 51.76 | 35.12 | 26.65 | 23.86 |
| 1080 | 162.4  | 51.77 | 35.13 | 26.65 | 23.85 |
| 1082 | 162.75 | 51.8  | 35.16 | 26.66 | 23.85 |
| 1084 | 163.11 | 51.84 | 35.21 | 26.68 | 23.86 |
| 1086 | 163.52 | 51.89 | 35.27 | 26.7  | 23.87 |
| 1088 | 163.88 | 51.94 | 35.33 | 26.74 | 23.9  |
| 1090 | 164.3  | 52    | 35.38 | 26.77 | 23.91 |
| 1092 | 164.69 | 52.07 | 35.46 | 26.81 | 23.94 |
| 1094 | 165.02 | 52.07 | 35.48 | 26.79 | 23.92 |
| 1096 | 165.37 | 52.1  | 35.51 | 26.8  | 23.91 |
| 1098 | 165.82 | 52.17 | 35.57 | 26.83 | 23.95 |
| 1100 | 166.18 | 52.22 | 35.64 | 26.86 | 23.97 |
| 1102 | 166.56 | 52.27 | 35.71 | 26.9  | 23.98 |
| 1104 | 166.91 | 52.31 | 35.76 | 26.92 | 24    |
| 1106 | 167.25 | 52.33 | 35.78 | 26.91 | 23.98 |
| 1108 | 167.66 | 52.36 | 35.81 | 26.92 | 23.99 |
| 1110 | 168.02 | 52.4  | 35.86 | 26.94 | 23.99 |
| 1112 | 168.41 | 52.48 | 35.94 | 27.01 | 24.02 |
| 1114 | 168.86 | 52.53 | 35.99 | 27.03 | 24.03 |
| 1116 | 169.25 | 52.59 | 36.07 | 27.07 | 24.06 |
| 1118 | 169.58 | 52.59 | 36.06 | 27.06 | 24.03 |
| 1120 | 169.92 | 52.62 | 36.1  | 27.07 | 24.03 |
| 1122 | 170.39 | 52.72 | 36.18 | 27.13 | 24.07 |
| 1124 | 170.72 | 52.73 | 36.21 | 27.14 | 24.08 |
| 1126 | 171.07 | 52.76 | 36.25 | 27.13 | 24.06 |
| 1128 | 171.44 | 52.8  | 36.29 | 27.15 | 24.07 |
| 1130 | 171.92 | 52.89 | 36.36 | 27.2  | 24.11 |
| 1132 | 172.29 | 52.93 | 36.42 | 27.23 | 24.12 |
| 1134 | 172.67 | 52.97 | 36.47 | 27.26 | 24.14 |
| 1136 | 173.08 | 53.03 | 36.55 | 27.3  | 24.17 |
| 1138 | 173.45 | 53.04 | 36.55 | 27.28 | 24.13 |
| 1140 | 173.83 | 53.09 | 36.62 | 27.32 | 24.16 |
| 1142 | 174.21 | 53.15 | 36.68 | 27.36 | 24.19 |
| 1144 | 174.54 | 53.16 | 36.68 | 27.34 | 24.16 |
| 1146 | 174.97 | 53.19 | 36.72 | 27.35 | 24.16 |
| 1148 | 175.36 | 53.25 | 36.78 | 27.38 | 24.17 |
| 1150 | 175.71 | 53.28 | 36.82 | 27.38 | 24.18 |
| 1152 | 176.08 | 53.31 | 36.86 | 27.4  | 24.19 |
| 1154 | 176.52 | 53.36 | 36.92 | 27.42 | 24.2  |
| 1156 | 176.87 | 53.38 | 36.95 | 27.43 | 24.19 |
| 1158 | 177.24 | 53.44 | 37    | 27.46 | 24.21 |
| 1160 | 177.61 | 53.49 | 37.05 | 27.49 | 24.23 |
| 1162 | 178.04 | 53.51 | 37.08 | 27.49 | 24.22 |
| 1164 | 178.43 | 53.59 | 37.16 | 27.53 | 24.25 |

|      |        |       |       |       |       |
|------|--------|-------|-------|-------|-------|
| 1166 | 178.81 | 53.63 | 37.21 | 27.57 | 24.26 |
| 1168 | 179.18 | 53.67 | 37.25 | 27.59 | 24.27 |
| 1170 | 179.62 | 53.72 | 37.29 | 27.64 | 24.3  |
| 1172 | 179.98 | 53.78 | 37.35 | 27.66 | 24.31 |
| 1174 | 180.34 | 53.82 | 37.4  | 27.68 | 24.32 |
| 1176 | 180.72 | 53.85 | 37.44 | 27.69 | 24.31 |
| 1178 | 181.19 | 53.92 | 37.5  | 27.73 | 24.35 |
| 1180 | 181.6  | 53.99 | 37.59 | 27.79 | 24.39 |
| 1182 | 181.96 | 54.01 | 37.62 | 27.79 | 24.39 |
| 1184 | 182.3  | 54.02 | 37.63 | 27.77 | 24.37 |
| 1186 | 182.76 | 54.1  | 37.71 | 27.83 | 24.4  |
| 1188 | 183.13 | 54.13 | 37.74 | 27.85 | 24.41 |
| 1190 | 183.52 | 54.2  | 37.83 | 27.89 | 24.46 |
| 1192 | 183.89 | 54.25 | 37.86 | 27.91 | 24.46 |
| 1194 | 184.3  | 54.25 | 37.88 | 27.91 | 24.44 |
| 1196 | 184.67 | 54.29 | 37.91 | 27.93 | 24.45 |
| 1198 | 185.06 | 54.34 | 37.96 | 27.96 | 24.47 |
| 1200 | 185.45 | 54.38 | 38.02 | 27.98 | 24.48 |
| 1202 | 185.9  | 54.42 | 38.06 | 27.99 | 24.47 |
| 1204 | 186.29 | 54.46 | 38.12 | 28.01 | 24.49 |
| 1206 | 186.65 | 54.5  | 38.15 | 28.03 | 24.49 |
| 1208 | 187.01 | 54.54 | 38.19 | 28.05 | 24.51 |
| 1210 | 187.47 | 54.59 | 38.25 | 28.09 | 24.54 |
| 1212 | 187.84 | 54.62 | 38.28 | 28.1  | 24.53 |
| 1214 | 188.23 | 54.68 | 38.34 | 28.15 | 24.56 |
| 1216 | 188.64 | 54.73 | 38.4  | 28.18 | 24.57 |
| 1218 | 189.05 | 54.76 | 38.42 | 28.2  | 24.57 |
| 1220 | 189.42 | 54.8  | 38.47 | 28.22 | 24.57 |
| 1222 | 189.8  | 54.85 | 38.52 | 28.24 | 24.59 |
| 1224 | 190.22 | 54.92 | 38.6  | 28.3  | 24.64 |
| 1226 | 190.65 | 54.97 | 38.64 | 28.33 | 24.65 |
| 1228 | 191.04 | 54.99 | 38.68 | 28.32 | 24.63 |
| 1230 | 191.43 | 55.05 | 38.72 | 28.37 | 24.66 |
| 1232 | 191.81 | 55.07 | 38.76 | 28.38 | 24.66 |
| 1234 | 192.27 | 55.16 | 38.84 | 28.43 | 24.71 |
| 1236 | 192.66 | 55.2  | 38.88 | 28.44 | 24.71 |
| 1238 | 192.99 | 55.2  | 38.89 | 28.43 | 24.68 |
| 1240 | 193.38 | 55.24 | 38.94 | 28.46 | 24.69 |
| 1242 | 193.77 | 55.3  | 38.99 | 28.5  | 24.72 |
| 1244 | 194.24 | 55.35 | 39.05 | 28.54 | 24.73 |
| 1246 | 194.62 | 55.4  | 39.09 | 28.56 | 24.75 |
| 1248 | 195.01 | 55.45 | 39.15 | 28.59 | 24.76 |
| 1250 | 195.42 | 55.46 | 39.16 | 28.59 | 24.75 |
| 1252 | 195.82 | 55.53 | 39.21 | 28.63 | 24.77 |

|      |        |       |       |       |       |
|------|--------|-------|-------|-------|-------|
| 1254 | 196.22 | 55.57 | 39.27 | 28.66 | 24.78 |
| 1256 | 196.58 | 55.58 | 39.29 | 28.66 | 24.77 |
| 1258 | 197.08 | 55.66 | 39.37 | 28.71 | 24.81 |
| 1260 | 197.46 | 55.71 | 39.42 | 28.75 | 24.84 |
| 1262 | 197.82 | 55.72 | 39.44 | 28.74 | 24.82 |
| 1264 | 198.21 | 55.75 | 39.48 | 28.76 | 24.83 |
| 1266 | 198.68 | 55.82 | 39.54 | 28.79 | 24.85 |
| 1268 | 199.09 | 55.88 | 39.61 | 28.83 | 24.88 |
| 1270 | 199.46 | 55.91 | 39.63 | 28.84 | 24.88 |
| 1272 | 199.84 | 55.92 | 39.65 | 28.85 | 24.87 |
| 1274 | 200.25 | 55.99 | 39.72 | 28.91 | 24.91 |
| 1276 | 200.72 | 56.04 | 39.77 | 28.94 | 24.93 |
| 1278 | 201.1  | 56.07 | 39.81 | 28.93 | 24.91 |
| 1280 | 201.52 | 56.15 | 39.88 | 28.99 | 24.95 |
| 1282 | 202    | 56.21 | 39.95 | 29.05 | 25    |
| 1284 | 202.34 | 56.21 | 39.95 | 29.03 | 24.96 |
| 1286 | 202.73 | 56.25 | 39.97 | 29.04 | 24.95 |
| 1288 | 203.12 | 56.29 | 40.02 | 29.06 | 24.97 |
| 1290 | 203.58 | 56.33 | 40.07 | 29.09 | 24.98 |
| 1292 | 203.98 | 56.38 | 40.12 | 29.11 | 24.99 |
| 1294 | 204.37 | 56.42 | 40.16 | 29.14 | 25    |
| 1296 | 204.76 | 56.46 | 40.2  | 29.17 | 25.02 |
| 1298 | 205.2  | 56.48 | 40.23 | 29.19 | 25.01 |
| 1300 | 205.63 | 56.54 | 40.29 | 29.23 | 25.03 |
| 1302 | 206.04 | 56.59 | 40.34 | 29.27 | 25.04 |
| 1304 | 206.43 | 56.63 | 40.38 | 29.29 | 25.06 |
| 1306 | 206.8  | 56.67 | 40.41 | 29.31 | 25.07 |
| 1308 | 207.28 | 56.73 | 40.48 | 29.35 | 25.09 |
| 1310 | 207.7  | 56.79 | 40.54 | 29.39 | 25.11 |
| 1312 | 208.09 | 56.82 | 40.57 | 29.41 | 25.11 |
| 1314 | 208.47 | 56.85 | 40.61 | 29.42 | 25.12 |
| 1316 | 208.93 | 56.9  | 40.64 | 29.45 | 25.12 |
| 1318 | 209.35 | 56.96 | 40.71 | 29.48 | 25.15 |
| 1320 | 209.73 | 56.98 | 40.74 | 29.5  | 25.15 |
| 1322 | 210.21 | 57.02 | 40.78 | 29.52 | 25.16 |
| 1324 | 210.62 | 57.09 | 40.86 | 29.57 | 25.2  |
| 1326 | 211.01 | 57.12 | 40.88 | 29.58 | 25.19 |
| 1328 | 211.4  | 57.15 | 40.91 | 29.6  | 25.2  |
| 1330 | 211.88 | 57.21 | 40.97 | 29.63 | 25.22 |
| 1332 | 212.29 | 57.23 | 41    | 29.65 | 25.22 |
| 1334 | 212.67 | 57.25 | 41.02 | 29.66 | 25.22 |
| 1336 | 213.09 | 57.3  | 41.09 | 29.69 | 25.24 |
| 1338 | 213.53 | 57.37 | 41.15 | 29.76 | 25.26 |
| 1340 | 214.02 | 57.42 | 41.21 | 29.8  | 25.3  |

|      |        |       |       |       |       |
|------|--------|-------|-------|-------|-------|
| 1342 | 214.42 | 57.45 | 41.25 | 29.8  | 25.3  |
| 1344 | 214.81 | 57.48 | 41.27 | 29.82 | 25.29 |
| 1346 | 215.28 | 57.53 | 41.31 | 29.85 | 25.3  |
| 1348 | 215.72 | 57.58 | 41.37 | 29.89 | 25.33 |
| 1350 | 216.12 | 57.61 | 41.4  | 29.9  | 25.33 |
| 1352 | 216.48 | 57.62 | 41.42 | 29.88 | 25.31 |
| 1354 | 216.99 | 57.68 | 41.49 | 29.95 | 25.34 |
| 1356 | 217.4  | 57.74 | 41.53 | 29.98 | 25.36 |
| 1358 | 217.8  | 57.78 | 41.57 | 30.01 | 25.37 |
| 1360 | 218.22 | 57.82 | 41.62 | 30.04 | 25.39 |
| 1362 | 218.6  | 57.84 | 41.65 | 30.06 | 25.37 |
| 1364 | 219.13 | 57.91 | 41.72 | 30.11 | 25.4  |
| 1366 | 219.55 | 57.95 | 41.76 | 30.14 | 25.41 |
| 1368 | 219.93 | 57.99 | 41.78 | 30.15 | 25.4  |
| 1370 | 220.43 | 58.05 | 41.83 | 30.18 | 25.42 |
| 1372 | 220.84 | 58.07 | 41.87 | 30.2  | 25.42 |
| 1374 | 221.29 | 58.13 | 41.93 | 30.25 | 25.46 |
| 1376 | 221.71 | 58.16 | 41.97 | 30.27 | 25.47 |
| 1378 | 222.19 | 58.2  | 42.01 | 30.29 | 25.48 |
| 1380 | 222.6  | 58.25 | 42.05 | 30.31 | 25.5  |
| 1382 | 222.97 | 58.25 | 42.06 | 30.28 | 25.45 |
| 1384 | 223.4  | 58.29 | 42.1  | 30.31 | 25.47 |
| 1386 | 223.9  | 58.36 | 42.17 | 30.37 | 25.5  |
| 1388 | 224.32 | 58.4  | 42.2  | 30.38 | 25.5  |
| 1390 | 224.73 | 58.43 | 42.23 | 30.41 | 25.5  |
| 1392 | 225.2  | 58.51 | 42.32 | 30.46 | 25.56 |
| 1394 | 225.68 | 58.55 | 42.35 | 30.49 | 25.57 |
| 1396 | 226.13 | 58.61 | 42.41 | 30.54 | 25.59 |
| 1398 | 226.54 | 58.65 | 42.46 | 30.58 | 25.6  |
| 1400 | 226.95 | 58.69 | 42.48 | 30.59 | 25.59 |
| 1402 | 227.45 | 58.72 | 42.52 | 30.61 | 25.6  |
| 1404 | 227.89 | 58.78 | 42.58 | 30.65 | 25.63 |
| 1406 | 228.32 | 58.82 | 42.63 | 30.69 | 25.65 |
| 1408 | 228.72 | 58.84 | 42.64 | 30.68 | 25.62 |
| 1410 | 229.23 | 58.9  | 42.69 | 30.72 | 25.65 |
| 1412 | 229.64 | 58.92 | 42.74 | 30.76 | 25.66 |
| 1414 | 230.02 | 58.93 | 42.74 | 30.74 | 25.64 |
| 1416 | 230.5  | 59.01 | 42.81 | 30.8  | 25.69 |
| 1418 | 230.9  | 59.03 | 42.83 | 30.8  | 25.67 |
| 1420 | 231.43 | 59.1  | 42.9  | 30.84 | 25.7  |
| 1422 | 231.86 | 59.14 | 42.95 | 30.88 | 25.74 |
| 1424 | 232.28 | 59.18 | 42.99 | 30.9  | 25.73 |
| 1426 | 232.71 | 59.23 | 43.04 | 30.94 | 25.75 |
| 1428 | 233.21 | 59.28 | 43.08 | 30.96 | 25.77 |



|      |        |       |       |       |       |
|------|--------|-------|-------|-------|-------|
| 1430 | 233.64 | 59.32 | 43.12 | 31    | 25.78 |
| 1432 | 234.09 | 59.36 | 43.17 | 31.03 | 25.8  |
| 1434 | 234.58 | 59.42 | 43.23 | 31.08 | 25.83 |
| 1436 | 235.02 | 59.46 | 43.27 | 31.09 | 25.83 |
| 1438 | 235.46 | 59.51 | 43.31 | 31.14 | 25.84 |
| 1440 | 235.9  | 59.55 | 43.35 | 31.17 | 25.85 |
| 1442 | 236.4  | 59.59 | 43.4  | 31.19 | 25.87 |
| 1444 | 236.82 | 59.64 | 43.44 | 31.22 | 25.88 |
| 1446 | 237.26 | 59.68 | 43.49 | 31.24 | 25.9  |
| 1448 | 237.7  | 59.72 | 43.54 | 31.27 | 25.91 |
| 1450 | 238.13 | 59.76 | 43.57 | 31.29 | 25.92 |
| 1452 | 238.64 | 59.81 | 43.63 | 31.33 | 25.93 |
| 1454 | 239.07 | 59.85 | 43.67 | 31.35 | 25.95 |
| 1456 | 239.51 | 59.89 | 43.7  | 31.38 | 25.96 |
| 1458 | 239.95 | 59.93 | 43.74 | 31.4  | 25.97 |
| 1460 | 240.47 | 59.98 | 43.8  | 31.44 | 26    |
| 1462 | 240.89 | 60.01 | 43.84 | 31.46 | 26    |
| 1464 | 241.33 | 60.05 | 43.88 | 31.49 | 26.01 |
| 1466 | 241.83 | 60.07 | 43.89 | 31.5  | 26.01 |
| 1468 | 242.28 | 60.14 | 43.96 | 31.54 | 26.04 |
| 1470 | 242.75 | 60.2  | 44.03 | 31.6  | 26.07 |
| 1472 | 243.16 | 60.22 | 44.05 | 31.61 | 26.07 |
| 1474 | 243.67 | 60.26 | 44.09 | 31.64 | 26.08 |
| 1476 | 244.11 | 60.3  | 44.13 | 31.67 | 26.09 |
| 1478 | 244.56 | 60.34 | 44.17 | 31.7  | 26.1  |
| 1480 | 245    | 60.37 | 44.21 | 31.73 | 26.12 |
| 1482 | 245.44 | 60.41 | 44.25 | 31.76 | 26.13 |
| 1484 | 245.94 | 60.46 | 44.29 | 31.78 | 26.15 |
| 1486 | 246.39 | 60.5  | 44.34 | 31.82 | 26.15 |
| 1488 | 246.84 | 60.53 | 44.39 | 31.84 | 26.16 |
| 1490 | 247.36 | 60.58 | 44.43 | 31.88 | 26.2  |
| 1492 | 247.79 | 60.61 | 44.46 | 31.88 | 26.2  |
| 1494 | 248.24 | 60.66 | 44.52 | 31.93 | 26.22 |
| 1496 | 248.67 | 60.68 | 44.55 | 31.94 | 26.22 |
| 1498 | 249.17 | 60.71 | 44.58 | 31.96 | 26.22 |
| 1500 | 249.63 | 60.76 | 44.63 | 31.99 | 26.24 |
| 1502 | 250.07 | 60.79 | 44.67 | 32    | 26.24 |
| 1504 | 250.49 | 60.8  | 44.68 | 32.02 | 26.24 |
| 1506 | 251    | 60.84 | 44.73 | 32.04 | 26.25 |
| 1508 | 251.46 | 60.9  | 44.78 | 32.08 | 26.29 |
| 1510 | 251.91 | 60.94 | 44.82 | 32.12 | 26.31 |
| 1512 | 252.37 | 60.99 | 44.88 | 32.16 | 26.34 |
| 1514 | 252.81 | 61.03 | 44.93 | 32.19 | 26.35 |
| 1516 | 253.31 | 61.05 | 44.94 | 32.19 | 26.33 |

|      |        |       |       |       |       |
|------|--------|-------|-------|-------|-------|
| 1518 | 253.74 | 61.07 | 44.97 | 32.21 | 26.33 |
| 1520 | 254.2  | 61.11 | 45    | 32.24 | 26.34 |
| 1522 | 254.73 | 61.16 | 45.06 | 32.28 | 26.38 |
| 1524 | 255.19 | 61.21 | 45.1  | 32.31 | 26.4  |
| 1526 | 255.63 | 61.25 | 45.16 | 32.36 | 26.41 |
| 1528 | 256.1  | 61.3  | 45.21 | 32.41 | 26.45 |
| 1530 | 256.62 | 61.34 | 45.26 | 32.44 | 26.46 |
| 1532 | 257.07 | 61.39 | 45.31 | 32.49 | 26.48 |
| 1534 | 257.5  | 61.42 | 45.34 | 32.51 | 26.48 |
| 1536 | 257.96 | 61.46 | 45.39 | 32.54 | 26.5  |
| 1538 | 258.48 | 61.51 | 45.44 | 32.56 | 26.51 |
| 1540 | 258.94 | 61.54 | 45.47 | 32.6  | 26.52 |
| 1542 | 259.39 | 61.57 | 45.51 | 32.62 | 26.54 |
| 1544 | 259.85 | 61.62 | 45.56 | 32.64 | 26.55 |
| 1546 | 260.26 | 61.61 | 45.56 | 32.63 | 26.53 |
| 1548 | 260.8  | 61.68 | 45.63 | 32.68 | 26.57 |
| 1550 | 261.25 | 61.71 | 45.67 | 32.71 | 26.58 |
| 1552 | 261.72 | 61.78 | 45.73 | 32.76 | 26.63 |
| 1554 | 262.22 | 61.79 | 45.75 | 32.76 | 26.6  |
| 1556 | 262.68 | 61.84 | 45.79 | 32.8  | 26.63 |
| 1558 | 263.14 | 61.88 | 45.84 | 32.84 | 26.65 |
| 1560 | 263.59 | 61.92 | 45.89 | 32.87 | 26.66 |
| 1562 | 264.12 | 61.97 | 45.94 | 32.91 | 26.68 |
| 1564 | 264.56 | 62.01 | 45.97 | 32.94 | 26.68 |
| 1566 | 265.01 | 62.04 | 46.01 | 32.98 | 26.7  |
| 1568 | 265.47 | 62.07 | 46.05 | 33.01 | 26.71 |
| 1570 | 266    | 62.11 | 46.09 | 33.03 | 26.73 |
| 1572 | 266.46 | 62.15 | 46.14 | 33.07 | 26.74 |
| 1574 | 266.92 | 62.18 | 46.18 | 33.09 | 26.76 |
| 1576 | 267.37 | 62.22 | 46.22 | 33.12 | 26.77 |
| 1578 | 267.89 | 62.26 | 46.26 | 33.16 | 26.78 |
| 1580 | 268.34 | 62.31 | 46.3  | 33.21 | 26.82 |
| 1582 | 268.83 | 62.38 | 46.37 | 33.25 | 26.84 |
| 1584 | 269.22 | 62.34 | 46.36 | 33.22 | 26.8  |
| 1586 | 269.78 | 62.4  | 46.42 | 33.27 | 26.84 |
| 1588 | 270.24 | 62.44 | 46.47 | 33.31 | 26.86 |
| 1590 | 270.69 | 62.48 | 46.5  | 33.33 | 26.86 |
| 1592 | 271.12 | 62.5  | 46.54 | 33.36 | 26.88 |
| 1594 | 271.66 | 62.55 | 46.58 | 33.39 | 26.91 |
| 1596 | 272.1  | 62.59 | 46.62 | 33.42 | 26.91 |
| 1598 | 272.56 | 62.61 | 46.67 | 33.44 | 26.93 |
| 1600 | 273.02 | 62.65 | 46.71 | 33.48 | 26.94 |
| 1602 | 273.56 | 62.68 | 46.75 | 33.51 | 26.96 |
| 1604 | 274.02 | 62.7  | 46.77 | 33.53 | 26.95 |

|      |        |       |       |       |       |
|------|--------|-------|-------|-------|-------|
| 1606 | 274.5  | 62.77 | 46.84 | 33.58 | 26.98 |
| 1608 | 274.94 | 62.8  | 46.88 | 33.59 | 26.99 |
| 1610 | 275.46 | 62.83 | 46.93 | 33.64 | 27.01 |
| 1612 | 275.9  | 62.86 | 46.95 | 33.65 | 27.02 |
| 1614 | 276.36 | 62.91 | 47    | 33.7  | 27.05 |
| 1616 | 276.8  | 62.94 | 47.03 | 33.73 | 27.05 |
| 1618 | 277.34 | 62.96 | 47.07 | 33.75 | 27.06 |
| 1620 | 277.78 | 62.98 | 47.09 | 33.77 | 27.05 |
| 1622 | 278.26 | 63.04 | 47.16 | 33.84 | 27.1  |
| 1624 | 278.7  | 63.07 | 47.19 | 33.86 | 27.1  |
| 1626 | 279.15 | 63.1  | 47.23 | 33.89 | 27.11 |
| 1628 | 279.68 | 63.15 | 47.26 | 33.92 | 27.13 |
| 1630 | 280.14 | 63.18 | 47.31 | 33.96 | 27.15 |
| 1632 | 280.61 | 63.21 | 47.35 | 33.98 | 27.16 |
| 1634 | 281.15 | 63.25 | 47.39 | 34.02 | 27.18 |
| 1636 | 281.56 | 63.27 | 47.39 | 34.01 | 27.15 |
| 1638 | 281.99 | 63.31 | 47.43 | 34.05 | 27.16 |
| 1640 | 282.45 | 63.35 | 47.48 | 34.1  | 27.2  |
| 1642 | 283.01 | 63.4  | 47.54 | 34.13 | 27.22 |
| 1644 | 283.46 | 63.42 | 47.58 | 34.15 | 27.24 |
| 1646 | 283.93 | 63.46 | 47.62 | 34.18 | 27.26 |
| 1648 | 284.46 | 63.48 | 47.65 | 34.2  | 27.27 |
| 1650 | 284.85 | 63.52 | 47.7  | 34.24 | 27.29 |
| 1652 | 285.38 | 63.56 | 47.74 | 34.27 | 27.3  |
| 1654 | 285.83 | 63.59 | 47.78 | 34.31 | 27.31 |
| 1656 | 286.29 | 63.63 | 47.83 | 34.35 | 27.33 |
| 1658 | 286.81 | 63.66 | 47.85 | 34.36 | 27.34 |
| 1660 | 287.28 | 63.71 | 47.9  | 34.4  | 27.36 |
| 1662 | 287.73 | 63.73 | 47.93 | 34.42 | 27.37 |
| 1664 | 288.19 | 63.76 | 47.97 | 34.46 | 27.38 |
| 1666 | 288.71 | 63.78 | 47.99 | 34.47 | 27.39 |
| 1668 | 289.17 | 63.83 | 48.05 | 34.52 | 27.41 |
| 1670 | 289.63 | 63.87 | 48.08 | 34.56 | 27.42 |
| 1672 | 290.07 | 63.89 | 48.11 | 34.58 | 27.43 |
| 1674 | 290.61 | 63.94 | 48.16 | 34.62 | 27.46 |
| 1676 | 291.08 | 63.97 | 48.21 | 34.65 | 27.47 |
| 1678 | 291.54 | 64.01 | 48.24 | 34.68 | 27.48 |
| 1680 | 291.99 | 64.04 | 48.28 | 34.71 | 27.5  |
| 1682 | 292.5  | 64.07 | 48.31 | 34.74 | 27.51 |
| 1684 | 292.95 | 64.1  | 48.34 | 34.76 | 27.53 |
| 1686 | 293.37 | 64.11 | 48.36 | 34.78 | 27.53 |
| 1688 | 293.87 | 64.16 | 48.43 | 34.83 | 27.56 |
| 1690 | 294.41 | 64.19 | 48.47 | 34.85 | 27.57 |
| 1692 | 294.89 | 64.23 | 48.51 | 34.88 | 27.59 |

|      |        |       |       |       |       |
|------|--------|-------|-------|-------|-------|
| 1694 | 295.33 | 64.26 | 48.54 | 34.92 | 27.6  |
| 1696 | 295.77 | 64.3  | 48.58 | 34.95 | 27.61 |
| 1698 | 296.29 | 64.33 | 48.62 | 34.98 | 27.63 |
| 1700 | 296.75 | 64.36 | 48.66 | 35.01 | 27.64 |
| 1702 | 297.23 | 64.4  | 48.73 | 35.05 | 27.67 |
| 1704 | 297.67 | 64.41 | 48.75 | 35.07 | 27.68 |
| 1706 | 298.14 | 64.45 | 48.79 | 35.12 | 27.7  |
| 1708 | 298.68 | 64.47 | 48.81 | 35.13 | 27.7  |
| 1710 | 299.15 | 64.52 | 48.87 | 35.17 | 27.74 |
| 1712 | 299.59 | 64.56 | 48.91 | 35.18 | 27.75 |
| 1714 | 300.09 | 64.58 | 48.94 | 35.21 | 27.76 |
| 1716 | 300.54 | 64.6  | 48.97 | 35.24 | 27.76 |
| 1718 | 301.02 | 64.64 | 49    | 35.27 | 27.77 |
| 1720 | 301.5  | 64.68 | 49.04 | 35.3  | 27.79 |
| 1722 | 302.03 | 64.7  | 49.08 | 35.33 | 27.8  |
| 1724 | 302.48 | 64.74 | 49.12 | 35.36 | 27.82 |
| 1726 | 302.92 | 64.79 | 49.17 | 35.41 | 27.83 |
| 1728 | 303.38 | 64.82 | 49.21 | 35.44 | 27.85 |
| 1730 | 303.93 | 64.86 | 49.23 | 35.46 | 27.86 |
| 1732 | 304.39 | 64.89 | 49.3  | 35.53 | 27.92 |
| 1734 | 304.84 | 64.91 | 49.32 | 35.54 | 27.91 |
| 1736 | 305.34 | 64.99 | 49.39 | 35.61 | 27.96 |
| 1738 | 305.76 | 64.99 | 49.39 | 35.6  | 27.93 |
| 1740 | 306.25 | 65    | 49.41 | 35.61 | 27.93 |
| 1742 | 306.71 | 65.03 | 49.45 | 35.65 | 27.96 |
| 1744 | 307.16 | 65.05 | 49.49 | 35.68 | 27.97 |
| 1746 | 307.63 | 65.1  | 49.53 | 35.71 | 27.98 |
| 1748 | 308.18 | 65.13 | 49.58 | 35.75 | 28.01 |
| 1750 | 308.64 | 65.16 | 49.61 | 35.77 | 28.01 |
| 1752 | 309.07 | 65.19 | 49.64 | 35.8  | 28.03 |
| 1754 | 309.62 | 65.26 | 49.7  | 35.86 | 28.07 |
| 1756 | 310.05 | 65.27 | 49.72 | 35.87 | 28.06 |
| 1758 | 310.53 | 65.32 | 49.78 | 35.92 | 28.11 |
| 1760 | 310.97 | 65.33 | 49.79 | 35.92 | 28.09 |
| 1762 | 311.47 | 65.35 | 49.82 | 35.94 | 28.08 |
| 1764 | 311.99 | 65.45 | 49.92 | 36.04 | 28.16 |
| 1766 | 312.45 | 65.48 | 49.96 | 36.06 | 28.18 |
| 1768 | 312.89 | 65.48 | 49.97 | 36.06 | 28.16 |
| 1770 | 313.44 | 65.53 | 50.03 | 36.12 | 28.21 |
| 1772 | 313.87 | 65.57 | 50.04 | 36.13 | 28.19 |
| 1774 | 314.32 | 65.59 | 50.07 | 36.14 | 28.19 |
| 1776 | 314.79 | 65.62 | 50.1  | 36.17 | 28.22 |
| 1778 | 315.33 | 65.66 | 50.16 | 36.22 | 28.26 |
| 1780 | 315.77 | 65.69 | 50.18 | 36.24 | 28.27 |

|      |        |       |       |       |       |
|------|--------|-------|-------|-------|-------|
| 1782 | 316.21 | 65.7  | 50.22 | 36.27 | 28.27 |
| 1784 | 316.68 | 65.76 | 50.28 | 36.32 | 28.3  |
| 1786 | 317.2  | 65.79 | 50.3  | 36.33 | 28.3  |
| 1788 | 317.65 | 65.82 | 50.34 | 36.36 | 28.3  |
| 1790 | 318.12 | 65.85 | 50.37 | 36.38 | 28.32 |
| 1792 | 318.53 | 65.84 | 50.37 | 36.39 | 28.31 |
| 1794 | 319.1  | 65.91 | 50.44 | 36.45 | 28.34 |
| 1796 | 319.58 | 65.99 | 50.49 | 36.49 | 28.38 |
| 1798 | 320.01 | 65.99 | 50.52 | 36.52 | 28.39 |
| 1800 | 320.49 | 66.05 | 50.59 | 36.57 | 28.43 |
| 1802 | 321.01 | 66.07 | 50.6  | 36.58 | 28.42 |
| 1804 | 321.47 | 66.12 | 50.65 | 36.62 | 28.45 |
| 1806 | 321.94 | 66.15 | 50.69 | 36.67 | 28.48 |
| 1808 | 322.41 | 66.18 | 50.72 | 36.68 | 28.48 |
| 1810 | 322.89 | 66.18 | 50.72 | 36.68 | 28.45 |
| 1812 | 323.34 | 66.22 | 50.76 | 36.72 | 28.49 |
| 1814 | 323.83 | 66.29 | 50.83 | 36.78 | 28.52 |
| 1816 | 324.26 | 66.29 | 50.83 | 36.78 | 28.51 |
| 1818 | 324.74 | 66.34 | 50.87 | 36.82 | 28.52 |
| 1820 | 325.26 | 66.37 | 50.9  | 36.84 | 28.53 |
| 1822 | 325.75 | 66.44 | 50.97 | 36.91 | 28.58 |
| 1824 | 326.17 | 66.44 | 50.98 | 36.92 | 28.57 |
| 1826 | 326.66 | 66.51 | 51.04 | 36.98 | 28.62 |
| 1828 | 327.18 | 66.54 | 51.07 | 36.99 | 28.62 |
| 1830 | 327.63 | 66.55 | 51.09 | 37.01 | 28.62 |
| 1832 | 328.09 | 66.59 | 51.13 | 37.05 | 28.64 |
| 1834 | 328.66 | 66.67 | 51.2  | 37.11 | 28.69 |
| 1836 | 329.1  | 66.69 | 51.22 | 37.13 | 28.68 |
| 1838 | 329.56 | 66.73 | 51.27 | 37.17 | 28.71 |
| 1840 | 329.99 | 66.75 | 51.27 | 37.18 | 28.7  |
| 1842 | 330.45 | 66.78 | 51.32 | 37.22 | 28.71 |
| 1844 | 331    | 66.81 | 51.36 | 37.24 | 28.74 |
| 1846 | 331.45 | 66.84 | 51.38 | 37.27 | 28.74 |
| 1848 | 331.92 | 66.88 | 51.41 | 37.28 | 28.75 |
| 1850 | 332.48 | 66.94 | 51.47 | 37.34 | 28.79 |
| 1852 | 332.91 | 66.97 | 51.48 | 37.36 | 28.8  |
| 1854 | 333.32 | 66.98 | 51.49 | 37.36 | 28.78 |
| 1856 | 333.78 | 67.03 | 51.55 | 37.41 | 28.81 |
| 1858 | 334.32 | 67.05 | 51.58 | 37.43 | 28.83 |
| 1860 | 334.81 | 67.1  | 51.62 | 37.47 | 28.85 |
| 1862 | 335.26 | 67.12 | 51.64 | 37.48 | 28.85 |
| 1864 | 335.71 | 67.15 | 51.66 | 37.49 | 28.85 |
| 1866 | 336.24 | 67.19 | 51.7  | 37.52 | 28.87 |
| 1868 | 336.72 | 67.27 | 51.76 | 37.59 | 28.91 |

|      |        |       |       |       |       |
|------|--------|-------|-------|-------|-------|
| 1870 | 337.15 | 67.28 | 51.77 | 37.6  | 28.9  |
| 1872 | 337.61 | 67.32 | 51.81 | 37.64 | 28.92 |
| 1874 | 338.16 | 67.38 | 51.85 | 37.66 | 28.94 |
| 1876 | 338.62 | 67.41 | 51.89 | 37.7  | 28.95 |
| 1878 | 339.08 | 67.44 | 51.92 | 37.72 | 28.96 |
| 1880 | 339.54 | 67.49 | 51.96 | 37.76 | 28.98 |
| 1882 | 340.01 | 67.54 | 52    | 37.8  | 29    |
| 1884 | 340.53 | 67.55 | 52.02 | 37.81 | 29    |
| 1886 | 340.98 | 67.59 | 52.05 | 37.83 | 29.01 |
| 1888 | 341.43 | 67.62 | 52.08 | 37.86 | 29.03 |
| 1890 | 341.9  | 67.66 | 52.12 | 37.89 | 29.04 |
| 1892 | 342.5  | 67.76 | 52.21 | 37.97 | 29.1  |
| 1894 | 342.94 | 67.78 | 52.24 | 38    | 29.12 |
| 1896 | 343.4  | 67.81 | 52.25 | 38.01 | 29.11 |
| 1898 | 343.92 | 67.86 | 52.3  | 38.05 | 29.14 |
| 1900 | 344.34 | 67.88 | 52.31 | 38.06 | 29.13 |
| 1902 | 344.79 | 67.9  | 52.33 | 38.07 | 29.13 |
| 1904 | 345.25 | 67.95 | 52.36 | 38.1  | 29.14 |
| 1906 | 345.79 | 67.99 | 52.39 | 38.13 | 29.15 |
| 1908 | 346.25 | 68.02 | 52.44 | 38.16 | 29.17 |
| 1910 | 346.73 | 68.08 | 52.49 | 38.2  | 29.21 |
| 1912 | 347.21 | 68.13 | 52.55 | 38.25 | 29.23 |
| 1914 | 347.67 | 68.18 | 52.58 | 38.28 | 29.27 |
| 1916 | 348.19 | 68.21 | 52.61 | 38.28 | 29.25 |
| 1918 | 348.64 | 68.24 | 52.63 | 38.31 | 29.27 |
| 1920 | 349.1  | 68.28 | 52.67 | 38.34 | 29.28 |
| 1922 | 349.67 | 68.33 | 52.73 | 38.39 | 29.31 |
| 1924 | 350.13 | 68.39 | 52.78 | 38.43 | 29.34 |
| 1926 | 350.58 | 68.43 | 52.81 | 38.47 | 29.35 |
| 1928 | 351.01 | 68.44 | 52.82 | 38.47 | 29.35 |
| 1930 | 351.53 | 68.47 | 52.84 | 38.5  | 29.35 |
| 1932 | 352    | 68.53 | 52.9  | 38.54 | 29.37 |
| 1934 | 352.47 | 68.57 | 52.94 | 38.59 | 29.4  |
| 1936 | 352.91 | 68.6  | 52.97 | 38.61 | 29.42 |
| 1938 | 353.45 | 68.65 | 53    | 38.63 | 29.43 |
| 1940 | 353.91 | 68.71 | 53.06 | 38.7  | 29.46 |
| 1942 | 354.35 | 68.72 | 53.08 | 38.7  | 29.46 |
| 1944 | 354.79 | 68.74 | 53.11 | 38.71 | 29.46 |
| 1946 | 355.23 | 68.77 | 53.12 | 38.72 | 29.46 |
| 1948 | 355.78 | 68.83 | 53.18 | 38.77 | 29.49 |
| 1950 | 356.22 | 68.84 | 53.21 | 38.77 | 29.49 |
| 1952 | 356.66 | 68.87 | 53.23 | 38.8  | 29.5  |
| 1954 | 357.19 | 68.91 | 53.26 | 38.83 | 29.52 |
| 1956 | 357.62 | 68.94 | 53.3  | 38.85 | 29.51 |

|      |        |       |       |       |       |
|------|--------|-------|-------|-------|-------|
| 1958 | 358.09 | 68.99 | 53.36 | 38.91 | 29.56 |
| 1960 | 358.5  | 68.99 | 53.35 | 38.89 | 29.54 |
| 1962 | 359.04 | 69.02 | 53.39 | 38.94 | 29.56 |
| 1964 | 359.5  | 69.07 | 53.43 | 38.97 | 29.58 |
| 1966 | 359.96 | 69.11 | 53.46 | 39.01 | 29.59 |
| 1968 | 360.39 | 69.13 | 53.49 | 39.03 | 29.59 |
| 1970 | 360.92 | 69.18 | 53.53 | 39.07 | 29.62 |
| 1972 | 361.36 | 69.22 | 53.58 | 39.11 | 29.63 |
| 1974 | 361.8  | 69.23 | 53.6  | 39.12 | 29.64 |
| 1976 | 362.26 | 69.27 | 53.65 | 39.17 | 29.68 |
| 1978 | 362.81 | 69.33 | 53.7  | 39.21 | 29.7  |
| 1980 | 363.23 | 69.34 | 53.73 | 39.23 | 29.72 |
| 1982 | 363.69 | 69.38 | 53.76 | 39.24 | 29.73 |
| 1984 | 364.12 | 69.41 | 53.79 | 39.26 | 29.73 |
| 1986 | 364.64 | 69.48 | 53.83 | 39.31 | 29.76 |
| 1988 | 365.06 | 69.49 | 53.86 | 39.33 | 29.76 |
| 1990 | 365.51 | 69.53 | 53.89 | 39.36 | 29.78 |
| 1992 | 365.96 | 69.56 | 53.92 | 39.38 | 29.79 |
| 1994 | 366.44 | 69.62 | 53.99 | 39.45 | 29.83 |
| 1996 | 366.94 | 69.66 | 54.02 | 39.47 | 29.84 |
| 1998 | 367.35 | 69.66 | 54.04 | 39.49 | 29.84 |
| 2000 | 367.78 | 69.71 | 54.07 | 39.53 | 29.85 |
| 2002 | 368.24 | 69.76 | 54.14 | 39.59 | 29.92 |
| 2004 | 368.74 | 69.79 | 54.15 | 39.59 | 29.91 |
| 2006 | 369.2  | 69.81 | 54.19 | 39.62 | 29.91 |
| 2008 | 369.64 | 69.85 | 54.23 | 39.66 | 29.93 |
| 2010 | 370.14 | 69.89 | 54.27 | 39.7  | 29.96 |
| 2012 | 370.54 | 69.9  | 54.28 | 39.7  | 29.95 |
| 2014 | 370.98 | 69.93 | 54.32 | 39.75 | 29.97 |
| 2016 | 371.41 | 69.97 | 54.36 | 39.77 | 29.98 |
| 2018 | 371.83 | 69.98 | 54.37 | 39.78 | 29.99 |
| 2020 | 372.34 | 70.01 | 54.39 | 39.8  | 29.99 |
| 2022 | 372.8  | 70.05 | 54.45 | 39.85 | 30.04 |
| 2024 | 373.26 | 70.1  | 54.51 | 39.9  | 30.07 |
| 2026 | 373.73 | 70.14 | 54.56 | 39.94 | 30.09 |
| 2028 | 374.14 | 70.18 | 54.59 | 39.98 | 30.12 |
| 2030 | 374.55 | 70.19 | 54.61 | 39.99 | 30.1  |
| 2032 | 374.97 | 70.2  | 54.64 | 40.02 | 30.14 |
| 2034 | 375.49 | 70.25 | 54.67 | 40.04 | 30.14 |
| 2036 | 375.92 | 70.27 | 54.7  | 40.06 | 30.14 |
| 2038 | 376.32 | 70.28 | 54.71 | 40.07 | 30.14 |
| 2040 | 376.73 | 70.3  | 54.74 | 40.09 | 30.16 |
| 2042 | 377.22 | 70.34 | 54.78 | 40.12 | 30.17 |
| 2044 | 377.64 | 70.37 | 54.81 | 40.15 | 30.19 |

|      |        |       |       |       |       |
|------|--------|-------|-------|-------|-------|
| 2046 | 378.06 | 70.4  | 54.84 | 40.19 | 30.2  |
| 2048 | 378.53 | 70.45 | 54.89 | 40.26 | 30.24 |
| 2050 | 378.95 | 70.48 | 54.93 | 40.28 | 30.26 |
| 2052 | 379.39 | 70.49 | 54.94 | 40.28 | 30.24 |
| 2054 | 379.77 | 70.5  | 54.97 | 40.31 | 30.25 |
| 2056 | 380.22 | 70.56 | 55.02 | 40.36 | 30.29 |
| 2058 | 380.69 | 70.58 | 55.04 | 40.37 | 30.29 |
| 2060 | 381.11 | 70.62 | 55.08 | 40.42 | 30.3  |
| 2062 | 381.52 | 70.65 | 55.13 | 40.45 | 30.32 |
| 2064 | 381.91 | 70.66 | 55.14 | 40.46 | 30.32 |
| 2066 | 382.42 | 70.72 | 55.19 | 40.51 | 30.38 |
| 2068 | 382.82 | 70.73 | 55.22 | 40.52 | 30.37 |
| 2070 | 383.21 | 70.74 | 55.24 | 40.53 | 30.36 |
| 2072 | 383.62 | 70.76 | 55.26 | 40.56 | 30.37 |
| 2074 | 384.1  | 70.8  | 55.31 | 40.59 | 30.38 |
| 2076 | 384.54 | 70.85 | 55.36 | 40.64 | 30.42 |
| 2078 | 384.93 | 70.86 | 55.38 | 40.67 | 30.44 |
| 2080 | 385.35 | 70.9  | 55.42 | 40.71 | 30.47 |
| 2082 | 385.81 | 70.94 | 55.45 | 40.75 | 30.48 |
| 2084 | 386.23 | 70.98 | 55.49 | 40.78 | 30.49 |
| 2086 | 386.62 | 71.02 | 55.51 | 40.8  | 30.49 |
| 2088 | 387.04 | 71.07 | 55.57 | 40.86 | 30.54 |
| 2090 | 387.49 | 71.08 | 55.59 | 40.88 | 30.55 |
| 2092 | 387.89 | 71.13 | 55.65 | 40.92 | 30.58 |
| 2094 | 388.28 | 71.15 | 55.67 | 40.93 | 30.57 |
| 2096 | 388.68 | 71.19 | 55.68 | 40.96 | 30.58 |
| 2098 | 389.14 | 71.21 | 55.71 | 40.98 | 30.59 |
| 2100 | 389.55 | 71.23 | 55.75 | 41.02 | 30.62 |
| 2102 | 389.92 | 71.25 | 55.75 | 41.02 | 30.59 |
| 2104 | 390.32 | 71.27 | 55.78 | 41.04 | 30.61 |
| 2106 | 390.74 | 71.34 | 55.84 | 41.1  | 30.66 |
| 2108 | 391.16 | 71.36 | 55.85 | 41.11 | 30.65 |
| 2110 | 391.55 | 71.38 | 55.88 | 41.13 | 30.65 |
| 2112 | 391.98 | 71.45 | 55.94 | 41.2  | 30.7  |
| 2114 | 392.35 | 71.45 | 55.94 | 41.2  | 30.68 |
| 2116 | 392.8  | 71.48 | 55.97 | 41.23 | 30.7  |
| 2118 | 393.18 | 71.51 | 55.99 | 41.24 | 30.72 |
| 2120 | 393.58 | 71.54 | 56.02 | 41.26 | 30.73 |
| 2122 | 394.04 | 71.6  | 56.08 | 41.32 | 30.77 |
| 2124 | 394.44 | 71.67 | 56.13 | 41.36 | 30.8  |
| 2126 | 394.82 | 71.71 | 56.14 | 41.37 | 30.8  |
| 2128 | 395.22 | 71.74 | 56.16 | 41.4  | 30.82 |
| 2130 | 395.68 | 71.8  | 56.19 | 41.43 | 30.84 |
| 2132 | 396.07 | 71.86 | 56.23 | 41.47 | 30.86 |



|      |        |       |       |       |       |
|------|--------|-------|-------|-------|-------|
| 2134 | 396.42 | 71.89 | 56.24 | 41.49 | 30.86 |
| 2136 | 396.82 | 71.95 | 56.28 | 41.54 | 30.87 |
| 2138 | 397.25 | 71.99 | 56.31 | 41.57 | 30.89 |
| 2140 | 397.64 | 72.06 | 56.33 | 41.59 | 30.9  |
| 2142 | 398.02 | 72.11 | 56.36 | 41.61 | 30.91 |
| 2144 | 398.37 | 72.14 | 56.36 | 41.61 | 30.9  |
| 2146 | 398.84 | 72.22 | 56.4  | 41.66 | 30.93 |
| 2148 | 399.23 | 72.31 | 56.45 | 41.71 | 30.96 |
| 2150 | 399.6  | 72.39 | 56.49 | 41.73 | 30.98 |
| 2152 | 399.95 | 72.42 | 56.46 | 41.72 | 30.97 |
| 2154 | 400.41 | 72.51 | 56.5  | 41.75 | 30.98 |
| 2156 | 400.78 | 72.57 | 56.52 | 41.76 | 30.98 |
| 2158 | 401.19 | 72.67 | 56.57 | 41.81 | 31.01 |
| 2160 | 401.58 | 72.78 | 56.62 | 41.86 | 31.05 |
| 2162 | 401.94 | 72.87 | 56.64 | 41.89 | 31.06 |
| 2164 | 402.36 | 72.96 | 56.65 | 41.9  | 31.06 |
| 2166 | 402.74 | 73.07 | 56.7  | 41.97 | 31.09 |
| 2168 | 403.09 | 73.14 | 56.7  | 41.97 | 31.08 |
| 2170 | 403.53 | 73.24 | 56.73 | 42    | 31.12 |
| 2172 | 403.91 | 73.35 | 56.75 | 42.02 | 31.13 |
| 2174 | 404.26 | 73.44 | 56.78 | 42.05 | 31.14 |
| 2176 | 404.62 | 73.53 | 56.79 | 42.07 | 31.14 |
| 2178 | 405.08 | 73.66 | 56.85 | 42.13 | 31.18 |
| 2180 | 405.44 | 73.76 | 56.87 | 42.16 | 31.2  |
| 2182 | 405.79 | 73.84 | 56.87 | 42.17 | 31.18 |
| 2184 | 406.17 | 73.93 | 56.9  | 42.18 | 31.19 |
| 2186 | 406.65 | 74.08 | 56.95 | 42.23 | 31.25 |
| 2188 | 407.01 | 74.19 | 56.99 | 42.26 | 31.26 |
| 2190 | 407.37 | 74.28 | 57.01 | 42.29 | 31.27 |
| 2192 | 407.72 | 74.39 | 57.03 | 42.33 | 31.29 |
| 2194 | 408.15 | 74.5  | 57.05 | 42.35 | 31.31 |
| 2196 | 408.51 | 74.6  | 57.08 | 42.37 | 31.32 |
| 2198 | 408.87 | 74.7  | 57.1  | 42.4  | 31.34 |
| 2200 | 409.24 | 74.8  | 57.13 | 42.43 | 31.35 |
| 2202 | 409.69 | 74.94 | 57.19 | 42.49 | 31.4  |
| 2204 | 410.01 | 75.04 | 57.18 | 42.48 | 31.38 |
| 2206 | 410.37 | 75.15 | 57.2  | 42.51 | 31.4  |
| 2208 | 410.72 | 75.24 | 57.21 | 42.53 | 31.4  |
| 2210 | 411.16 | 75.36 | 57.23 | 42.53 | 31.4  |
| 2212 | 411.54 | 75.49 | 57.27 | 42.58 | 31.43 |
| 2214 | 411.89 | 75.59 | 57.27 | 42.6  | 31.44 |
| 2216 | 412.25 | 75.7  | 57.3  | 42.62 | 31.44 |
| 2218 | 412.66 | 75.84 | 57.33 | 42.67 | 31.47 |
| 2220 | 413.01 | 75.95 | 57.36 | 42.69 | 31.48 |

|      |        |       |       |       |       |
|------|--------|-------|-------|-------|-------|
| 2222 | 413.38 | 76.07 | 57.39 | 42.72 | 31.5  |
| 2224 | 413.75 | 76.19 | 57.41 | 42.75 | 31.52 |
| 2226 | 414.13 | 76.31 | 57.44 | 42.78 | 31.54 |
| 2228 | 414.55 | 76.44 | 57.45 | 42.8  | 31.54 |
| 2230 | 414.87 | 76.53 | 57.45 | 42.8  | 31.53 |
| 2232 | 415.25 | 76.67 | 57.5  | 42.84 | 31.57 |
| 2234 | 415.65 | 76.8  | 57.52 | 42.87 | 31.58 |
| 2236 | 416.01 | 76.94 | 57.54 | 42.89 | 31.59 |
| 2238 | 416.36 | 77.07 | 57.56 | 42.91 | 31.61 |
| 2240 | 416.74 | 77.2  | 57.58 | 42.93 | 31.62 |
| 2242 | 417.19 | 77.38 | 57.62 | 42.97 | 31.65 |
| 2244 | 417.55 | 77.52 | 57.66 | 43.02 | 31.68 |
| 2246 | 417.84 | 77.59 | 57.61 | 42.99 | 31.64 |
| 2248 | 418.23 | 77.77 | 57.69 | 43.06 | 31.69 |
| 2250 | 418.61 | 77.95 | 57.74 | 43.11 | 31.73 |
| 2252 | 418.99 | 78.07 | 57.72 | 43.09 | 31.69 |
| 2254 | 419.38 | 78.26 | 57.77 | 43.15 | 31.74 |
| 2256 | 419.74 | 78.41 | 57.78 | 43.16 | 31.75 |
| 2258 | 420.11 | 78.55 | 57.78 | 43.16 | 31.73 |
| 2260 | 420.45 | 78.73 | 57.79 | 43.18 | 31.72 |
| 2262 | 420.83 | 78.9  | 57.81 | 43.22 | 31.75 |
| 2264 | 421.17 | 79.06 | 57.83 | 43.24 | 31.75 |
| 2266 | 421.59 | 79.26 | 57.85 | 43.27 | 31.77 |
| 2268 | 421.95 | 79.42 | 57.87 | 43.28 | 31.77 |
| 2270 | 422.3  | 79.61 | 57.9  | 43.33 | 31.8  |
| 2272 | 422.65 | 79.78 | 57.92 | 43.35 | 31.82 |
| 2274 | 423.06 | 80    | 57.93 | 43.37 | 31.83 |
| 2276 | 423.39 | 80.14 | 57.93 | 43.35 | 31.81 |
| 2278 | 423.79 | 80.35 | 57.98 | 43.4  | 31.85 |
| 2280 | 424.16 | 80.56 | 58.01 | 43.43 | 31.89 |
| 2282 | 424.57 | 80.74 | 58.03 | 43.46 | 31.88 |
| 2284 | 424.97 | 81    | 58.08 | 43.52 | 31.92 |
| 2286 | 425.29 | 81.17 | 58.08 | 43.52 | 31.91 |
| 2288 | 425.64 | 81.36 | 58.08 | 43.53 | 31.92 |
| 2290 | 426.09 | 81.56 | 58.1  | 43.55 | 31.93 |
| 2292 | 426.47 | 81.83 | 58.17 | 43.61 | 31.97 |
| 2294 | 426.84 | 82.04 | 58.2  | 43.66 | 32.01 |
| 2296 | 427.17 | 82.23 | 58.2  | 43.66 | 31.99 |
| 2298 | 427.6  | 82.5  | 58.24 | 43.72 | 32.04 |
| 2300 | 427.97 | 82.7  | 58.26 | 43.73 | 32.04 |
| 2302 | 428.35 | 82.92 | 58.28 | 43.77 | 32.06 |
| 2304 | 428.76 | 83.16 | 58.33 | 43.82 | 32.11 |
| 2306 | 429.12 | 83.35 | 58.33 | 43.8  | 32.1  |
| 2308 | 429.53 | 83.58 | 58.35 | 43.82 | 32.11 |

|      |        |       |       |       |       |
|------|--------|-------|-------|-------|-------|
| 2310 | 429.88 | 83.8  | 58.37 | 43.85 | 32.11 |
| 2312 | 430.26 | 84.05 | 58.41 | 43.9  | 32.16 |
| 2314 | 430.68 | 84.28 | 58.42 | 43.93 | 32.18 |
| 2316 | 431.06 | 84.56 | 58.46 | 43.97 | 32.2  |
| 2318 | 431.43 | 84.78 | 58.46 | 43.97 | 32.19 |
| 2320 | 431.83 | 85.04 | 58.51 | 44.02 | 32.23 |
| 2322 | 432.18 | 85.28 | 58.52 | 44.04 | 32.26 |
| 2324 | 432.58 | 85.54 | 58.53 | 44.05 | 32.24 |
| 2326 | 432.93 | 85.76 | 58.54 | 44.07 | 32.25 |
| 2328 | 433.36 | 86.03 | 58.59 | 44.11 | 32.3  |
| 2330 | 433.83 | 86.28 | 58.61 | 44.15 | 32.32 |
| 2332 | 434.22 | 86.58 | 58.63 | 44.17 | 32.33 |
| 2334 | 434.6  | 86.84 | 58.64 | 44.2  | 32.35 |
| 2336 | 434.98 | 87.1  | 58.66 | 44.22 | 32.36 |
| 2338 | 435.43 | 87.4  | 58.67 | 44.25 | 32.38 |
| 2340 | 435.85 | 87.65 | 58.7  | 44.27 | 32.39 |
| 2342 | 436.3  | 87.92 | 58.71 | 44.27 | 32.4  |
| 2344 | 436.74 | 88.18 | 58.73 | 44.3  | 32.41 |
| 2346 | 437.22 | 88.48 | 58.76 | 44.33 | 32.44 |
| 2348 | 437.77 | 88.82 | 58.79 | 44.38 | 32.47 |
| 2350 | 438.2  | 89.1  | 58.81 | 44.38 | 32.47 |
| 2352 | 438.64 | 89.4  | 58.82 | 44.39 | 32.48 |
| 2354 | 439.13 | 89.7  | 58.84 | 44.41 | 32.49 |
| 2356 | 439.78 | 90.08 | 58.87 | 44.42 | 32.51 |
| 2358 | 440.38 | 90.45 | 58.93 | 44.48 | 32.55 |
| 2360 | 440.94 | 90.77 | 58.93 | 44.48 | 32.54 |
| 2362 | 441.61 | 91.12 | 58.97 | 44.5  | 32.56 |
| 2364 | 442.18 | 91.54 | 59    | 44.53 | 32.57 |
| 2366 | 442.68 | 91.87 | 59    | 44.51 | 32.54 |
| 2368 | 443.22 | 92.26 | 59.05 | 44.54 | 32.57 |
| 2370 | 443.81 | 92.73 | 59.1  | 44.57 | 32.58 |
| 2372 | 444.31 | 93.17 | 59.17 | 44.61 | 32.6  |
| 2374 | 444.75 | 93.56 | 59.18 | 44.59 | 32.58 |
| 2376 | 445.19 | 94    | 59.23 | 44.6  | 32.58 |
| 2378 | 445.69 | 94.45 | 59.28 | 44.62 | 32.59 |
| 2380 | 446.09 | 94.97 | 59.32 | 44.61 | 32.58 |
| 2382 | 446.49 | 95.46 | 59.42 | 44.65 | 32.61 |
| 2384 | 446.9  | 95.99 | 59.52 | 44.7  | 32.65 |
| 2386 | 447.23 | 96.46 | 59.57 | 44.7  | 32.65 |
| 2388 | 447.62 | 97.06 | 59.68 | 44.74 | 32.68 |
| 2390 | 447.9  | 97.55 | 59.74 | 44.75 | 32.67 |
| 2392 | 448.18 | 98.05 | 59.81 | 44.76 | 32.67 |
| 2394 | 448.45 | 98.56 | 59.89 | 44.78 | 32.69 |
| 2396 | 448.73 | 99.13 | 59.98 | 44.79 | 32.68 |

|      |        |        |       |       |       |
|------|--------|--------|-------|-------|-------|
| 2398 | 448.95 | 99.66  | 60.06 | 44.82 | 32.7  |
| 2400 | 449.18 | 100.2  | 60.18 | 44.88 | 32.74 |
| 2402 | 449.35 | 100.7  | 60.25 | 44.89 | 32.74 |
| 2404 | 449.51 | 101.27 | 60.32 | 44.88 | 32.73 |
| 2406 | 449.65 | 101.77 | 60.4  | 44.9  | 32.74 |
| 2408 | 449.76 | 102.29 | 60.48 | 44.93 | 32.75 |
| 2410 | 449.87 | 102.88 | 60.56 | 44.95 | 32.75 |
| 2412 | 449.95 | 103.37 | 60.65 | 44.97 | 32.76 |
| 2414 | 450    | 103.87 | 60.72 | 45    | 32.76 |
| 2416 | 450.02 | 104.36 | 60.79 | 45.01 | 32.76 |
| 2418 | 450.06 | 104.87 | 60.86 | 45.04 | 32.78 |
| 2420 | 450.06 | 105.37 | 60.94 | 45.06 | 32.79 |
| 2422 | 450.04 | 105.95 | 61.02 | 45.09 | 32.8  |
| 2424 | 449.99 | 106.45 | 61.09 | 45.12 | 32.81 |
| 2426 | 449.94 | 106.94 | 61.15 | 45.14 | 32.81 |
| 2428 | 449.85 | 107.5  | 61.22 | 45.16 | 32.82 |
| 2430 | 449.76 | 107.99 | 61.29 | 45.19 | 32.83 |
| 2432 | 449.65 | 108.47 | 61.35 | 45.21 | 32.84 |
| 2434 | 449.51 | 108.96 | 61.41 | 45.23 | 32.85 |
| 2436 | 449.35 | 109.51 | 61.46 | 45.26 | 32.86 |
| 2438 | 449.19 | 110    | 61.52 | 45.28 | 32.86 |
| 2440 | 449.03 | 110.5  | 61.59 | 45.31 | 32.87 |
| 2442 | 448.82 | 110.98 | 61.64 | 45.33 | 32.88 |
| 2444 | 448.62 | 111.53 | 61.7  | 45.36 | 32.89 |
| 2446 | 448.44 | 112.05 | 61.79 | 45.4  | 32.95 |
| 2448 | 448.18 | 112.48 | 61.8  | 45.39 | 32.92 |
| 2450 | 447.93 | 112.93 | 61.84 | 45.41 | 32.93 |
| 2452 | 447.65 | 113.48 | 61.88 | 45.44 | 32.93 |
| 2454 | 447.39 | 113.93 | 61.92 | 45.46 | 32.92 |
| 2456 | 447.14 | 114.42 | 61.98 | 45.51 | 32.96 |
| 2458 | 446.85 | 114.87 | 62.02 | 45.52 | 32.96 |
| 2460 | 446.52 | 115.41 | 62.06 | 45.55 | 32.97 |
| 2462 | 446.23 | 115.87 | 62.1  | 45.58 | 32.98 |
| 2464 | 445.9  | 116.31 | 62.11 | 45.59 | 32.96 |
| 2466 | 445.52 | 116.77 | 62.15 | 45.6  | 32.96 |
| 2468 | 445.23 | 117.29 | 62.18 | 45.62 | 32.98 |
| 2470 | 444.87 | 117.71 | 62.18 | 45.62 | 32.95 |
| 2472 | 444.54 | 118.17 | 62.23 | 45.66 | 32.97 |
| 2474 | 444.17 | 118.63 | 62.28 | 45.72 | 32.99 |
| 2476 | 443.82 | 119.08 | 62.33 | 45.75 | 33.01 |
| 2478 | 443.47 | 119.61 | 62.35 | 45.77 | 33.02 |
| 2480 | 443.1  | 120.02 | 62.35 | 45.76 | 33    |
| 2482 | 442.71 | 120.43 | 62.35 | 45.77 | 32.99 |
| 2484 | 442.3  | 120.89 | 62.4  | 45.8  | 33.01 |

|      |        |        |       |       |       |
|------|--------|--------|-------|-------|-------|
| 2486 | 441.92 | 121.41 | 62.43 | 45.83 | 33.01 |
| 2488 | 441.57 | 121.86 | 62.48 | 45.87 | 33.04 |
| 2490 | 441.16 | 122.27 | 62.47 | 45.87 | 33.03 |
| 2492 | 440.73 | 122.8  | 62.52 | 45.91 | 33.06 |
| 2494 | 440.33 | 123.22 | 62.53 | 45.93 | 33.06 |
| 2496 | 439.94 | 123.65 | 62.56 | 45.95 | 33.07 |
| 2498 | 439.56 | 124.08 | 62.58 | 45.98 | 33.08 |
| 2500 | 439.08 | 124.6  | 62.61 | 46.01 | 33.09 |
| 2502 | 438.71 | 125.06 | 62.66 | 46.06 | 33.13 |
| 2504 | 438.3  | 125.48 | 62.67 | 46.07 | 33.14 |
| 2506 | 437.81 | 125.88 | 62.67 | 46.08 | 33.13 |
| 2508 | 437.41 | 126.38 | 62.69 | 46.11 | 33.14 |
| 2510 | 437    | 126.81 | 62.71 | 46.15 | 33.15 |
| 2512 | 436.59 | 127.24 | 62.74 | 46.19 | 33.17 |
| 2514 | 436.21 | 127.69 | 62.79 | 46.24 | 33.21 |
| 2516 | 435.7  | 128.09 | 62.78 | 46.24 | 33.2  |
| 2518 | 435.27 | 128.58 | 62.79 | 46.27 | 33.21 |
| 2520 | 434.88 | 129.02 | 62.82 | 46.3  | 33.23 |
| 2522 | 434.37 | 129.45 | 62.84 | 46.32 | 33.25 |
| 2524 | 433.93 | 129.93 | 62.84 | 46.32 | 33.22 |
| 2526 | 433.57 | 130.4  | 62.9  | 46.4  | 33.28 |
| 2528 | 433.13 | 130.8  | 62.88 | 46.38 | 33.26 |
| 2530 | 432.62 | 131.22 | 62.9  | 46.42 | 33.27 |
| 2532 | 432.21 | 131.71 | 62.91 | 46.42 | 33.26 |
| 2534 | 431.81 | 132.16 | 62.95 | 46.49 | 33.3  |
| 2536 | 431.36 | 132.56 | 62.94 | 46.5  | 33.3  |
| 2538 | 430.95 | 133    | 62.96 | 46.51 | 33.3  |
| 2540 | 430.45 | 133.48 | 62.97 | 46.54 | 33.3  |
| 2542 | 430.03 | 133.9  | 62.98 | 46.56 | 33.32 |
| 2544 | 429.64 | 134.36 | 63.02 | 46.61 | 33.35 |
| 2546 | 429.14 | 134.77 | 63.01 | 46.61 | 33.35 |
| 2548 | 428.72 | 135.29 | 63.04 | 46.63 | 33.36 |
| 2550 | 428.36 | 135.78 | 63.1  | 46.7  | 33.43 |
| 2552 | 427.94 | 136.21 | 63.12 | 46.73 | 33.42 |
| 2554 | 427.53 | 136.65 | 63.14 | 46.77 | 33.46 |
| 2556 | 427.05 | 137.16 | 63.15 | 46.8  | 33.47 |
| 2558 | 426.62 | 137.6  | 63.17 | 46.81 | 33.46 |
| 2560 | 426.23 | 138.05 | 63.18 | 46.85 | 33.49 |
| 2562 | 425.82 | 138.5  | 63.2  | 46.87 | 33.5  |
| 2564 | 425.34 | 139.01 | 63.22 | 46.89 | 33.51 |
| 2566 | 424.97 | 139.48 | 63.26 | 46.92 | 33.55 |
| 2568 | 424.52 | 139.91 | 63.25 | 46.93 | 33.55 |
| 2570 | 424.1  | 140.34 | 63.25 | 46.93 | 33.54 |
| 2572 | 423.64 | 140.89 | 63.28 | 46.97 | 33.58 |

|      |        |        |       |       |       |
|------|--------|--------|-------|-------|-------|
| 2574 | 423.24 | 141.34 | 63.3  | 47    | 33.58 |
| 2576 | 422.84 | 141.8  | 63.31 | 47.03 | 33.59 |
| 2578 | 422.34 | 142.24 | 63.32 | 47.04 | 33.59 |
| 2580 | 421.95 | 142.79 | 63.35 | 47.06 | 33.61 |
| 2582 | 421.54 | 143.24 | 63.36 | 47.09 | 33.63 |
| 2584 | 421.14 | 143.71 | 63.37 | 47.11 | 33.64 |
| 2586 | 420.76 | 144.19 | 63.4  | 47.13 | 33.66 |
| 2588 | 420.35 | 144.65 | 63.41 | 47.16 | 33.67 |
| 2590 | 419.88 | 145.2  | 63.43 | 47.19 | 33.68 |
| 2592 | 419.48 | 145.67 | 63.45 | 47.22 | 33.71 |
| 2594 | 419.09 | 146.16 | 63.47 | 47.24 | 33.72 |
| 2596 | 418.63 | 146.63 | 63.49 | 47.24 | 33.72 |
| 2598 | 418.24 | 147.18 | 63.5  | 47.26 | 33.74 |
| 2600 | 417.85 | 147.64 | 63.51 | 47.29 | 33.75 |
| 2602 | 417.49 | 148.16 | 63.57 | 47.34 | 33.8  |
| 2604 | 417    | 148.7  | 63.57 | 47.35 | 33.78 |
| 2606 | 416.58 | 149.15 | 63.55 | 47.35 | 33.77 |
| 2608 | 416.2  | 149.65 | 63.58 | 47.37 | 33.8  |
| 2610 | 415.8  | 150.12 | 63.59 | 47.38 | 33.79 |
| 2612 | 415.36 | 150.61 | 63.61 | 47.4  | 33.82 |
| 2614 | 414.99 | 151.18 | 63.64 | 47.43 | 33.84 |
| 2616 | 414.55 | 151.61 | 63.6  | 47.4  | 33.79 |
| 2618 | 414.17 | 152.11 | 63.63 | 47.43 | 33.82 |
| 2620 | 413.75 | 152.73 | 63.68 | 47.48 | 33.86 |
| 2622 | 413.37 | 153.23 | 63.7  | 47.51 | 33.86 |
| 2624 | 412.97 | 153.72 | 63.71 | 47.53 | 33.88 |
| 2626 | 412.6  | 154.22 | 63.72 | 47.54 | 33.88 |
| 2628 | 412.17 | 154.72 | 63.74 | 47.56 | 33.9  |
| 2630 | 411.82 | 155.35 | 63.8  | 47.63 | 33.95 |
| 2632 | 411.44 | 155.83 | 63.8  | 47.63 | 33.95 |
| 2634 | 411.05 | 156.33 | 63.81 | 47.65 | 33.96 |
| 2636 | 410.61 | 156.92 | 63.83 | 47.66 | 33.98 |
| 2638 | 410.23 | 157.44 | 63.85 | 47.68 | 33.98 |
| 2640 | 409.86 | 157.95 | 63.87 | 47.69 | 33.99 |
| 2642 | 409.41 | 158.45 | 63.86 | 47.69 | 34    |
| 2644 | 409.04 | 159.06 | 63.9  | 47.74 | 34.03 |
| 2646 | 408.66 | 159.54 | 63.88 | 47.71 | 33.99 |
| 2648 | 408.32 | 160.09 | 63.93 | 47.76 | 34.03 |
| 2650 | 407.97 | 160.62 | 63.95 | 47.8  | 34.04 |
| 2652 | 407.58 | 161.13 | 63.96 | 47.8  | 34.05 |
| 2654 | 407.17 | 161.75 | 63.99 | 47.83 | 34.07 |
| 2656 | 406.78 | 162.27 | 63.99 | 47.83 | 34.07 |
| 2658 | 406.42 | 162.8  | 64.03 | 47.87 | 34.09 |
| 2660 | 406.01 | 163.41 | 64.04 | 47.89 | 34.11 |

|      |        |        |       |       |       |
|------|--------|--------|-------|-------|-------|
| 2662 | 405.65 | 163.93 | 64.07 | 47.91 | 34.11 |
| 2664 | 405.3  | 164.45 | 64.08 | 47.94 | 34.13 |
| 2666 | 404.94 | 164.99 | 64.11 | 47.96 | 34.14 |
| 2668 | 404.52 | 165.62 | 64.13 | 47.97 | 34.15 |
| 2670 | 404.16 | 166.15 | 64.15 | 47.99 | 34.16 |
| 2672 | 403.8  | 166.69 | 64.16 | 48.01 | 34.18 |
| 2674 | 403.42 | 167.21 | 64.16 | 48    | 34.17 |
| 2676 | 403.01 | 167.84 | 64.18 | 48.03 | 34.18 |
| 2678 | 402.67 | 168.4  | 64.23 | 48.06 | 34.21 |
| 2680 | 402.29 | 168.92 | 64.22 | 48.05 | 34.2  |
| 2682 | 401.85 | 169.45 | 64.22 | 48.06 | 34.2  |
| 2684 | 401.54 | 170.11 | 64.26 | 48.08 | 34.22 |
| 2686 | 401.21 | 170.67 | 64.29 | 48.13 | 34.26 |
| 2688 | 400.82 | 171.19 | 64.3  | 48.12 | 34.25 |
| 2690 | 400.51 | 171.76 | 64.34 | 48.15 | 34.29 |
| 2692 | 400.08 | 172.39 | 64.34 | 48.15 | 34.28 |
| 2694 | 399.73 | 172.96 | 64.36 | 48.17 | 34.28 |
| 2696 | 399.36 | 173.5  | 64.35 | 48.16 | 34.27 |
| 2698 | 398.98 | 174.07 | 64.39 | 48.2  | 34.31 |
| 2700 | 398.66 | 174.75 | 64.44 | 48.25 | 34.35 |
| 2702 | 398.26 | 175.17 | 64.4  | 48.21 | 34.3  |
| 2704 | 397.95 | 175.84 | 64.45 | 48.26 | 34.33 |
| 2706 | 397.58 | 176.44 | 64.51 | 48.31 | 34.37 |
| 2708 | 397.3  | 177.01 | 64.53 | 48.33 | 34.38 |
| 2710 | 396.91 | 177.67 | 64.55 | 48.36 | 34.39 |
| 2712 | 396.57 | 178.24 | 64.57 | 48.38 | 34.4  |
| 2714 | 396.21 | 178.78 | 64.57 | 48.37 | 34.39 |
| 2716 | 395.83 | 179.35 | 64.6  | 48.4  | 34.39 |
| 2718 | 395.5  | 180.04 | 64.63 | 48.43 | 34.42 |
| 2720 | 395.18 | 180.63 | 64.67 | 48.47 | 34.45 |
| 2722 | 394.78 | 181.19 | 64.67 | 48.47 | 34.45 |
| 2724 | 394.44 | 181.86 | 64.69 | 48.47 | 34.45 |
| 2726 | 394.08 | 182.39 | 64.68 | 48.44 | 34.42 |
| 2728 | 393.75 | 182.98 | 64.7  | 48.48 | 34.44 |
| 2730 | 393.46 | 183.6  | 64.75 | 48.51 | 34.46 |
| 2732 | 393.07 | 184.28 | 64.78 | 48.53 | 34.48 |
| 2734 | 392.72 | 184.84 | 64.78 | 48.53 | 34.48 |
| 2736 | 392.39 | 185.43 | 64.8  | 48.54 | 34.49 |
| 2738 | 392.1  | 186.07 | 64.85 | 48.58 | 34.52 |
| 2740 | 391.69 | 186.7  | 64.84 | 48.56 | 34.49 |
| 2742 | 391.36 | 187.28 | 64.85 | 48.57 | 34.49 |
| 2744 | 391.06 | 187.91 | 64.91 | 48.62 | 34.53 |
| 2746 | 390.72 | 188.47 | 64.91 | 48.62 | 34.53 |
| 2748 | 390.37 | 189.11 | 64.95 | 48.67 | 34.56 |

|      |        |        |       |       |       |
|------|--------|--------|-------|-------|-------|
| 2750 | 390.07 | 189.81 | 64.98 | 48.69 | 34.58 |
| 2752 | 389.76 | 190.42 | 65.03 | 48.73 | 34.61 |
| 2754 | 389.41 | 190.98 | 65.02 | 48.71 | 34.59 |
| 2756 | 389.04 | 191.69 | 65.06 | 48.74 | 34.61 |
| 2758 | 388.7  | 192.26 | 65.05 | 48.73 | 34.6  |
| 2760 | 388.41 | 192.88 | 65.09 | 48.74 | 34.62 |
| 2762 | 388.06 | 193.51 | 65.15 | 48.8  | 34.67 |
| 2764 | 387.74 | 194.21 | 65.16 | 48.8  | 34.67 |
| 2766 | 387.43 | 194.81 | 65.2  | 48.82 | 34.68 |
| 2768 | 387.1  | 195.39 | 65.2  | 48.82 | 34.68 |
| 2770 | 386.82 | 196.03 | 65.26 | 48.87 | 34.72 |
| 2772 | 386.46 | 196.64 | 65.28 | 48.89 | 34.74 |
| 2774 | 386.15 | 197.33 | 65.31 | 48.9  | 34.74 |
| 2776 | 385.86 | 197.96 | 65.35 | 48.92 | 34.76 |
| 2778 | 385.55 | 198.56 | 65.37 | 48.93 | 34.77 |
| 2780 | 385.21 | 199.3  | 65.41 | 48.97 | 34.79 |
| 2782 | 384.89 | 199.91 | 65.44 | 48.98 | 34.79 |
| 2784 | 384.6  | 200.54 | 65.48 | 49.02 | 34.82 |
| 2786 | 384.27 | 201.14 | 65.49 | 49.02 | 34.82 |
| 2788 | 383.91 | 201.84 | 65.53 | 49.04 | 34.83 |
| 2790 | 383.59 | 202.44 | 65.54 | 49.05 | 34.83 |
| 2792 | 383.3  | 203.07 | 65.58 | 49.08 | 34.85 |
| 2794 | 383    | 203.69 | 65.61 | 49.1  | 34.86 |
| 2796 | 382.64 | 204.28 | 65.62 | 49.1  | 34.85 |
| 2798 | 382.34 | 205.01 | 65.67 | 49.12 | 34.88 |
| 2800 | 382.07 | 205.65 | 65.74 | 49.17 | 34.93 |
| 2802 | 381.76 | 206.25 | 65.75 | 49.17 | 34.93 |
| 2804 | 381.41 | 206.98 | 65.77 | 49.19 | 34.94 |
| 2806 | 381.12 | 207.6  | 65.82 | 49.22 | 34.95 |
| 2808 | 380.81 | 208.2  | 65.85 | 49.24 | 34.98 |
| 2810 | 380.52 | 208.82 | 65.89 | 49.26 | 34.98 |
| 2812 | 380.14 | 209.4  | 65.89 | 49.25 | 34.97 |
| 2814 | 379.85 | 210.12 | 65.93 | 49.27 | 34.98 |
| 2816 | 379.56 | 210.74 | 65.96 | 49.3  | 34.99 |
| 2818 | 379.26 | 211.35 | 65.99 | 49.32 | 35.01 |
| 2820 | 378.94 | 212.08 | 66.03 | 49.34 | 35.03 |
| 2822 | 378.62 | 212.69 | 66.06 | 49.35 | 35.03 |
| 2824 | 378.31 | 213.3  | 66.08 | 49.36 | 35.04 |
| 2826 | 378.04 | 213.94 | 66.13 | 49.41 | 35.06 |
| 2828 | 377.74 | 214.56 | 66.16 | 49.41 | 35.08 |
| 2830 | 377.39 | 215.28 | 66.2  | 49.42 | 35.08 |
| 2832 | 377.1  | 215.91 | 66.24 | 49.44 | 35.11 |
| 2834 | 376.78 | 216.5  | 66.25 | 49.45 | 35.11 |
| 2836 | 376.45 | 217.14 | 66.31 | 49.5  | 35.16 |



|      |        |        |       |       |       |
|------|--------|--------|-------|-------|-------|
| 2838 | 376.17 | 217.85 | 66.36 | 49.52 | 35.17 |
| 2840 | 375.86 | 218.47 | 66.39 | 49.54 | 35.18 |
| 2842 | 375.58 | 219.1  | 66.44 | 49.58 | 35.21 |
| 2844 | 375.25 | 219.83 | 66.49 | 49.62 | 35.23 |
| 2846 | 374.95 | 220.44 | 66.51 | 49.63 | 35.23 |
| 2848 | 374.6  | 221.02 | 66.51 | 49.62 | 35.23 |
| 2850 | 374.35 | 221.68 | 66.59 | 49.67 | 35.26 |
| 2852 | 373.99 | 222.29 | 66.62 | 49.68 | 35.25 |
| 2854 | 373.65 | 222.95 | 66.61 | 49.66 | 35.22 |
| 2856 | 373.38 | 223.59 | 66.66 | 49.7  | 35.26 |
| 2858 | 373.09 | 224.21 | 66.71 | 49.74 | 35.28 |
| 2860 | 372.73 | 224.93 | 66.75 | 49.76 | 35.28 |
| 2862 | 372.41 | 225.53 | 66.78 | 49.74 | 35.26 |
| 2864 | 372.14 | 226.16 | 66.83 | 49.78 | 35.29 |
| 2866 | 371.77 | 226.74 | 66.84 | 49.79 | 35.29 |
| 2868 | 371.49 | 227.48 | 66.89 | 49.82 | 35.32 |
| 2870 | 371.2  | 228.1  | 66.95 | 49.87 | 35.34 |
| 2872 | 370.91 | 228.72 | 66.99 | 49.89 | 35.35 |
| 2874 | 370.59 | 229.31 | 67.01 | 49.87 | 35.33 |
| 2876 | 370.23 | 229.9  | 67.03 | 49.89 | 35.33 |
| 2878 | 369.94 | 230.63 | 67.09 | 49.93 | 35.35 |
| 2880 | 369.64 | 231.24 | 67.13 | 49.96 | 35.37 |
| 2882 | 369.37 | 231.87 | 67.19 | 49.99 | 35.4  |
| 2884 | 368.97 | 232.54 | 67.19 | 49.97 | 35.36 |
| 2886 | 368.68 | 233.15 | 67.24 | 49.99 | 35.36 |
| 2888 | 368.39 | 233.77 | 67.29 | 50.02 | 35.4  |
| 2890 | 368.02 | 234.34 | 67.3  | 50.02 | 35.39 |
| 2892 | 367.71 | 235.04 | 67.35 | 50.04 | 35.4  |
| 2894 | 367.41 | 235.66 | 67.39 | 50.07 | 35.41 |
| 2896 | 367.11 | 236.26 | 67.42 | 50.06 | 35.41 |
| 2898 | 366.81 | 236.85 | 67.46 | 50.08 | 35.42 |
| 2900 | 366.46 | 237.45 | 67.5  | 50.1  | 35.44 |
| 2902 | 366.24 | 238.08 | 67.57 | 50.14 | 35.47 |
| 2904 | 365.88 | 238.78 | 67.62 | 50.17 | 35.47 |
| 2906 | 365.56 | 239.36 | 67.65 | 50.18 | 35.47 |
| 2908 | 365.23 | 240.09 | 67.71 | 50.21 | 35.5  |
| 2910 | 364.94 | 240.71 | 67.78 | 50.26 | 35.54 |
| 2912 | 364.63 | 241.29 | 67.79 | 50.24 | 35.51 |
| 2914 | 364.28 | 241.89 | 67.84 | 50.27 | 35.53 |
| 2916 | 363.98 | 242.58 | 67.89 | 50.28 | 35.53 |
| 2918 | 363.71 | 243.22 | 67.97 | 50.34 | 35.57 |
| 2920 | 363.38 | 243.79 | 68    | 50.34 | 35.56 |
| 2922 | 363.1  | 244.4  | 68.06 | 50.37 | 35.58 |
| 2924 | 362.75 | 244.99 | 68.11 | 50.4  | 35.59 |

|      |        |        |       |       |       |
|------|--------|--------|-------|-------|-------|
| 2926 | 362.47 | 245.7  | 68.19 | 50.43 | 35.61 |
| 2928 | 362.16 | 246.3  | 68.24 | 50.46 | 35.62 |
| 2930 | 361.9  | 246.95 | 68.34 | 50.5  | 35.67 |
| 2932 | 361.56 | 247.66 | 68.4  | 50.54 | 35.7  |
| 2934 | 361.25 | 248.23 | 68.45 | 50.55 | 35.69 |
| 2936 | 360.95 | 248.82 | 68.5  | 50.57 | 35.69 |
| 2938 | 360.61 | 249.38 | 68.53 | 50.56 | 35.68 |
| 2940 | 360.28 | 250.1  | 68.61 | 50.59 | 35.7  |
| 2942 | 359.97 | 250.69 | 68.67 | 50.6  | 35.71 |
| 2944 | 359.68 | 251.3  | 68.75 | 50.63 | 35.73 |
| 2946 | 359.38 | 251.87 | 68.79 | 50.64 | 35.74 |
| 2948 | 359.04 | 252.58 | 68.87 | 50.68 | 35.76 |
| 2950 | 358.76 | 253.19 | 68.96 | 50.7  | 35.78 |
| 2952 | 358.47 | 253.81 | 69.03 | 50.75 | 35.81 |
| 2954 | 358.15 | 254.38 | 69.09 | 50.75 | 35.79 |
| 2956 | 357.8  | 254.98 | 69.16 | 50.77 | 35.8  |
| 2958 | 357.53 | 255.7  | 69.26 | 50.82 | 35.84 |
| 2960 | 357.21 | 256.28 | 69.32 | 50.83 | 35.84 |
| 2962 | 356.91 | 256.87 | 69.39 | 50.85 | 35.85 |
| 2964 | 356.55 | 257.55 | 69.44 | 50.86 | 35.84 |
| 2966 | 356.27 | 258.18 | 69.56 | 50.92 | 35.88 |
| 2968 | 355.99 | 258.81 | 69.64 | 50.97 | 35.92 |
| 2970 | 355.63 | 259.41 | 69.71 | 50.99 | 35.92 |
| 2972 | 355.35 | 260.13 | 69.81 | 51.03 | 35.94 |
| 2974 | 355.07 | 260.75 | 69.92 | 51.07 | 35.98 |
| 2976 | 354.78 | 261.36 | 69.99 | 51.1  | 35.99 |
| 2978 | 354.46 | 261.96 | 70.06 | 51.11 | 35.98 |
| 2980 | 354.16 | 262.61 | 70.18 | 51.18 | 36.04 |
| 2982 | 353.85 | 263.34 | 70.28 | 51.21 | 36.07 |
| 2984 | 353.57 | 263.97 | 70.38 | 51.26 | 36.09 |
| 2986 | 353.26 | 264.56 | 70.43 | 51.26 | 36.07 |
| 2988 | 352.9  | 265.29 | 70.52 | 51.3  | 36.09 |
| 2990 | 352.6  | 265.92 | 70.61 | 51.32 | 36.1  |
| 2992 | 352.33 | 266.6  | 70.72 | 51.37 | 36.13 |
| 2994 | 352.05 | 267.26 | 70.82 | 51.41 | 36.15 |
| 2996 | 351.7  | 267.91 | 70.92 | 51.45 | 36.16 |
| 2998 | 351.38 | 268.65 | 70.98 | 51.45 | 36.15 |
| 3000 | 351.11 | 269.33 | 71.08 | 51.51 | 36.19 |
| 3002 | 350.81 | 270.01 | 71.17 | 51.54 | 36.2  |
| 3004 | 350.5  | 270.71 | 71.25 | 51.59 | 36.24 |
| 3006 | 350.2  | 271.52 | 71.33 | 51.61 | 36.23 |
| 3008 | 349.91 | 272.23 | 71.42 | 51.66 | 36.26 |
| 3010 | 349.63 | 272.95 | 71.5  | 51.72 | 36.28 |
| 3012 | 349.29 | 273.79 | 71.58 | 51.73 | 36.31 |

|      |        |        |       |       |       |
|------|--------|--------|-------|-------|-------|
| 3014 | 348.95 | 274.46 | 71.61 | 51.73 | 36.29 |
| 3016 | 348.68 | 275.2  | 71.7  | 51.79 | 36.34 |
| 3018 | 348.41 | 275.93 | 71.78 | 51.85 | 36.35 |
| 3020 | 348.08 | 276.65 | 71.86 | 51.9  | 36.37 |
| 3022 | 347.8  | 277.49 | 71.93 | 51.94 | 36.39 |
| 3024 | 347.51 | 278.22 | 72    | 51.98 | 36.42 |
| 3026 | 347.24 | 278.94 | 72.06 | 52.03 | 36.45 |
| 3028 | 346.89 | 279.77 | 72.11 | 52.06 | 36.46 |
| 3030 | 346.6  | 280.48 | 72.18 | 52.11 | 36.47 |
| 3032 | 346.32 | 281.18 | 72.23 | 52.15 | 36.49 |
| 3034 | 345.95 | 281.85 | 72.28 | 52.18 | 36.5  |
| 3036 | 345.68 | 282.67 | 72.34 | 52.2  | 36.51 |
| 3038 | 345.41 | 283.37 | 72.42 | 52.27 | 36.55 |
| 3040 | 345.13 | 284.05 | 72.47 | 52.31 | 36.57 |
| 3042 | 344.88 | 284.76 | 72.54 | 52.37 | 36.6  |
| 3044 | 344.54 | 285.52 | 72.61 | 52.43 | 36.63 |
| 3046 | 344.28 | 286.19 | 72.66 | 52.48 | 36.66 |
| 3048 | 344    | 286.85 | 72.71 | 52.51 | 36.67 |
| 3050 | 343.65 | 287.48 | 72.74 | 52.53 | 36.67 |
| 3052 | 343.37 | 288.24 | 72.8  | 52.58 | 36.68 |
| 3054 | 343.1  | 288.89 | 72.86 | 52.64 | 36.7  |
| 3056 | 342.8  | 289.52 | 72.91 | 52.66 | 36.7  |
| 3058 | 342.54 | 290.14 | 72.97 | 52.72 | 36.74 |
| 3060 | 342.25 | 290.79 | 73.04 | 52.78 | 36.77 |
| 3062 | 341.96 | 291.51 | 73.1  | 52.83 | 36.78 |
| 3064 | 341.68 | 292.13 | 73.15 | 52.86 | 36.8  |
| 3066 | 341.41 | 292.74 | 73.21 | 52.91 | 36.82 |
| 3068 | 341.09 | 293.46 | 73.27 | 52.96 | 36.85 |
| 3070 | 340.82 | 294.08 | 73.34 | 52.99 | 36.86 |
| 3072 | 340.54 | 294.7  | 73.4  | 53.05 | 36.88 |
| 3074 | 340.28 | 295.31 | 73.46 | 53.1  | 36.91 |
| 3076 | 339.97 | 296.02 | 73.54 | 53.17 | 36.94 |
| 3078 | 339.68 | 296.61 | 73.6  | 53.21 | 36.95 |
| 3080 | 339.41 | 297.22 | 73.66 | 53.26 | 36.98 |
| 3082 | 339.12 | 297.82 | 73.72 | 53.31 | 37.01 |
| 3084 | 338.87 | 298.48 | 73.83 | 53.4  | 37.08 |
| 3086 | 338.6  | 299.19 | 73.93 | 53.48 | 37.12 |
| 3088 | 338.3  | 299.77 | 73.97 | 53.5  | 37.12 |
| 3090 | 338    | 300.34 | 74    | 53.53 | 37.13 |
| 3092 | 337.68 | 301.05 | 74.06 | 53.55 | 37.14 |
| 3094 | 337.43 | 301.7  | 74.16 | 53.63 | 37.2  |
| 3096 | 337.15 | 302.3  | 74.23 | 53.67 | 37.22 |
| 3098 | 336.83 | 302.89 | 74.29 | 53.72 | 37.24 |
| 3100 | 336.55 | 303.58 | 74.34 | 53.74 | 37.23 |

|      |        |        |       |       |       |
|------|--------|--------|-------|-------|-------|
| 3102 | 336.28 | 304.21 | 74.44 | 53.81 | 37.27 |
| 3104 | 336.02 | 304.83 | 74.51 | 53.87 | 37.32 |
| 3106 | 335.75 | 305.45 | 74.56 | 53.91 | 37.33 |
| 3108 | 335.44 | 306.07 | 74.65 | 53.97 | 37.37 |
| 3110 | 335.17 | 306.8  | 74.73 | 54.04 | 37.4  |
| 3112 | 334.88 | 307.41 | 74.78 | 54.07 | 37.4  |
| 3114 | 334.63 | 308.06 | 74.89 | 54.15 | 37.47 |
| 3116 | 334.32 | 308.8  | 74.97 | 54.21 | 37.5  |
| 3118 | 334.04 | 309.42 | 75.06 | 54.26 | 37.5  |
| 3120 | 333.76 | 310.05 | 75.13 | 54.3  | 37.53 |
| 3122 | 333.51 | 310.72 | 75.24 | 54.39 | 37.59 |
| 3124 | 333.18 | 311.36 | 75.3  | 54.42 | 37.59 |
| 3126 | 332.91 | 312.11 | 75.39 | 54.47 | 37.61 |
| 3128 | 332.66 | 312.79 | 75.49 | 54.55 | 37.66 |
| 3130 | 332.33 | 313.43 | 75.56 | 54.59 | 37.68 |
| 3132 | 332.06 | 314.21 | 75.65 | 54.64 | 37.7  |
| 3134 | 331.8  | 314.89 | 75.75 | 54.7  | 37.74 |
| 3136 | 331.57 | 315.6  | 75.88 | 54.8  | 37.81 |
| 3138 | 331.3  | 316.28 | 75.98 | 54.86 | 37.84 |
| 3140 | 331.01 | 317.08 | 76.08 | 54.93 | 37.89 |
| 3142 | 330.71 | 317.75 | 76.15 | 54.98 | 37.89 |
| 3144 | 330.43 | 318.44 | 76.23 | 55.02 | 37.92 |
| 3146 | 330.21 | 319.17 | 76.35 | 55.12 | 37.98 |
| 3148 | 329.88 | 319.88 | 76.44 | 55.18 | 38.02 |
| 3150 | 329.59 | 320.69 | 76.5  | 55.2  | 38.01 |
| 3152 | 329.32 | 321.39 | 76.58 | 55.26 | 38.03 |
| 3154 | 329.04 | 322.11 | 76.64 | 55.3  | 38.06 |
| 3156 | 328.73 | 322.97 | 76.73 | 55.35 | 38.08 |
| 3158 | 328.47 | 323.72 | 76.84 | 55.43 | 38.13 |
| 3160 | 328.21 | 324.46 | 76.91 | 55.49 | 38.15 |
| 3162 | 327.95 | 325.21 | 76.99 | 55.55 | 38.2  |
| 3164 | 327.62 | 325.94 | 77.06 | 55.59 | 38.21 |
| 3166 | 327.38 | 326.87 | 77.18 | 55.68 | 38.26 |
| 3168 | 327.14 | 327.66 | 77.28 | 55.77 | 38.33 |
| 3170 | 326.88 | 328.44 | 77.37 | 55.85 | 38.38 |
| 3172 | 326.56 | 329.33 | 77.43 | 55.89 | 38.39 |
| 3174 | 326.33 | 330.14 | 77.55 | 55.99 | 38.44 |
| 3176 | 326.07 | 330.93 | 77.64 | 56.07 | 38.49 |
| 3178 | 325.8  | 331.73 | 77.72 | 56.14 | 38.53 |
| 3180 | 325.52 | 332.65 | 77.81 | 56.21 | 38.57 |
| 3182 | 325.24 | 333.42 | 77.89 | 56.27 | 38.59 |
| 3184 | 324.98 | 334.21 | 77.95 | 56.32 | 38.61 |
| 3186 | 324.72 | 335.01 | 78.04 | 56.39 | 38.66 |
| 3188 | 324.44 | 335.8  | 78.13 | 56.46 | 38.71 |

|      |        |        |       |       |       |
|------|--------|--------|-------|-------|-------|
| 3190 | 324.2  | 336.74 | 78.28 | 56.54 | 38.76 |
| 3192 | 323.95 | 337.52 | 78.38 | 56.62 | 38.8  |
| 3194 | 323.69 | 338.31 | 78.5  | 56.68 | 38.85 |
| 3196 | 323.33 | 339.18 | 78.57 | 56.7  | 38.83 |
| 3198 | 323.09 | 339.99 | 78.75 | 56.78 | 38.88 |
| 3200 | 322.86 | 340.8  | 78.91 | 56.86 | 38.94 |
| 3202 | 322.6  | 341.58 | 79.07 | 56.94 | 38.98 |
| 3204 | 322.31 | 342.33 | 79.21 | 57.01 | 39.02 |
| 3206 | 322.09 | 343.26 | 79.42 | 57.11 | 39.06 |
| 3208 | 321.84 | 344.03 | 79.59 | 57.17 | 39.11 |
| 3210 | 321.55 | 344.76 | 79.72 | 57.2  | 39.1  |
| 3212 | 321.27 | 345.51 | 79.9  | 57.25 | 39.13 |
| 3214 | 321.02 | 346.42 | 80.11 | 57.33 | 39.18 |
| 3216 | 320.76 | 347.18 | 80.3  | 57.38 | 39.2  |
| 3218 | 320.51 | 347.94 | 80.49 | 57.44 | 39.23 |
| 3220 | 320.22 | 348.82 | 80.72 | 57.51 | 39.28 |
| 3222 | 320.01 | 349.62 | 80.99 | 57.61 | 39.34 |
| 3224 | 319.78 | 350.37 | 81.22 | 57.68 | 39.41 |
| 3226 | 319.54 | 351.13 | 81.45 | 57.73 | 39.44 |
| 3228 | 319.27 | 351.88 | 81.68 | 57.81 | 39.49 |
| 3230 | 319.03 | 352.75 | 81.96 | 57.87 | 39.52 |
| 3232 | 318.79 | 353.5  | 82.2  | 57.94 | 39.57 |
| 3234 | 318.55 | 354.24 | 82.46 | 58    | 39.62 |
| 3236 | 318.25 | 355.08 | 82.72 | 58.05 | 39.66 |
| 3238 | 318.02 | 355.83 | 83.02 | 58.11 | 39.69 |
| 3240 | 317.79 | 356.56 | 83.3  | 58.21 | 39.75 |
| 3242 | 317.57 | 357.31 | 83.59 | 58.27 | 39.8  |
| 3244 | 317.28 | 358.16 | 83.9  | 58.32 | 39.85 |
| 3246 | 317.03 | 358.89 | 84.2  | 58.4  | 39.9  |
| 3248 | 316.81 | 359.61 | 84.51 | 58.46 | 39.94 |
| 3250 | 316.57 | 360.34 | 84.82 | 58.52 | 39.98 |
| 3252 | 316.32 | 361.09 | 85.15 | 58.6  | 40.05 |
| 3254 | 316.07 | 361.92 | 85.51 | 58.64 | 40.06 |
| 3256 | 315.86 | 362.66 | 85.86 | 58.72 | 40.14 |
| 3258 | 315.64 | 363.39 | 86.2  | 58.79 | 40.19 |
| 3260 | 315.38 | 364.08 | 86.51 | 58.81 | 40.2  |
| 3262 | 315.11 | 364.91 | 86.91 | 58.87 | 40.22 |
| 3264 | 314.88 | 365.62 | 87.26 | 58.93 | 40.27 |
| 3266 | 314.68 | 366.37 | 87.67 | 59.02 | 40.33 |
| 3268 | 314.4  | 367.07 | 88.03 | 59.08 | 40.37 |
| 3270 | 314.2  | 367.93 | 88.51 | 59.19 | 40.44 |
| 3272 | 313.97 | 368.65 | 88.91 | 59.25 | 40.49 |
| 3274 | 313.76 | 369.37 | 89.32 | 59.32 | 40.55 |
| 3276 | 313.47 | 370.16 | 89.69 | 59.34 | 40.56 |

|      |        |        |        |       |       |
|------|--------|--------|--------|-------|-------|
| 3278 | 313.27 | 370.88 | 90.19  | 59.43 | 40.62 |
| 3280 | 313.06 | 371.59 | 90.62  | 59.52 | 40.68 |
| 3282 | 312.81 | 372.26 | 91.02  | 59.54 | 40.69 |
| 3284 | 312.54 | 373.07 | 91.46  | 59.61 | 40.74 |
| 3286 | 312.34 | 373.77 | 91.98  | 59.68 | 40.79 |
| 3288 | 312.11 | 374.45 | 92.43  | 59.75 | 40.85 |
| 3290 | 311.9  | 375.16 | 92.9   | 59.8  | 40.9  |
| 3292 | 311.67 | 375.86 | 93.4   | 59.88 | 40.97 |
| 3294 | 311.47 | 376.67 | 93.95  | 59.96 | 41.01 |
| 3296 | 311.26 | 377.35 | 94.43  | 60.02 | 41.07 |
| 3298 | 311.02 | 378    | 94.92  | 60.06 | 41.09 |
| 3300 | 310.81 | 378.69 | 95.43  | 60.12 | 41.15 |
| 3302 | 310.58 | 379.38 | 95.95  | 60.19 | 41.2  |
| 3304 | 310.38 | 380.16 | 96.57  | 60.26 | 41.27 |
| 3306 | 310.16 | 380.82 | 97.1   | 60.3  | 41.3  |
| 3308 | 309.93 | 381.51 | 97.67  | 60.38 | 41.35 |
| 3310 | 309.71 | 382.27 | 98.2   | 60.43 | 41.38 |
| 3312 | 309.51 | 382.94 | 98.84  | 60.5  | 41.42 |
| 3314 | 309.34 | 383.62 | 99.44  | 60.57 | 41.48 |
| 3316 | 309.06 | 384.26 | 100    | 60.61 | 41.51 |
| 3318 | 308.88 | 385.04 | 100.68 | 60.68 | 41.56 |
| 3320 | 308.71 | 385.73 | 101.32 | 60.78 | 41.63 |
| 3322 | 308.49 | 386.36 | 101.9  | 60.82 | 41.65 |
| 3324 | 308.31 | 387    | 102.54 | 60.89 | 41.71 |
| 3326 | 308.11 | 387.79 | 103.18 | 60.96 | 41.77 |
| 3328 | 307.89 | 388.42 | 103.9  | 61.01 | 41.81 |
| 3330 | 307.66 | 389.03 | 104.53 | 61.06 | 41.82 |
| 3332 | 307.44 | 389.69 | 105.21 | 61.12 | 41.87 |
| 3334 | 307.25 | 390.44 | 105.99 | 61.17 | 41.92 |
| 3336 | 307.05 | 391.09 | 106.68 | 61.23 | 41.97 |
| 3338 | 306.86 | 391.73 | 107.35 | 61.29 | 42.03 |
| 3340 | 306.61 | 392.44 | 108.02 | 61.34 | 42.04 |
| 3342 | 306.44 | 393.08 | 108.85 | 61.38 | 42.1  |
| 3344 | 306.26 | 393.71 | 109.58 | 61.47 | 42.19 |
| 3346 | 306.08 | 394.35 | 110.31 | 61.51 | 42.22 |
| 3348 | 305.83 | 394.95 | 111.02 | 61.55 | 42.25 |
| 3350 | 305.67 | 395.71 | 111.79 | 61.65 | 42.34 |
| 3352 | 305.48 | 396.34 | 112.65 | 61.71 | 42.39 |
| 3354 | 305.3  | 396.97 | 113.4  | 61.77 | 42.45 |
| 3356 | 305.06 | 397.65 | 114.16 | 61.81 | 42.48 |
| 3358 | 304.89 | 398.28 | 115.07 | 61.88 | 42.54 |
| 3360 | 304.72 | 398.92 | 115.87 | 61.96 | 42.61 |
| 3362 | 304.53 | 399.51 | 116.64 | 62.01 | 42.65 |
| 3364 | 304.33 | 400.14 | 117.46 | 62.06 | 42.7  |

|      |        |        |        |       |       |
|------|--------|--------|--------|-------|-------|
| 3366 | 304.15 | 400.85 | 118.25 | 62.1  | 42.75 |
| 3368 | 303.99 | 401.47 | 119.23 | 62.18 | 42.83 |
| 3370 | 303.77 | 402.04 | 120.02 | 62.2  | 42.85 |
| 3372 | 303.61 | 402.78 | 120.89 | 62.27 | 42.94 |
| 3374 | 303.41 | 403.38 | 121.71 | 62.31 | 42.97 |
| 3376 | 303.21 | 403.99 | 122.69 | 62.36 | 43.04 |
| 3378 | 303.07 | 404.63 | 123.57 | 62.44 | 43.11 |
| 3380 | 302.91 | 405.24 | 124.46 | 62.49 | 43.16 |
| 3382 | 302.69 | 405.9  | 125.46 | 62.53 | 43.2  |
| 3384 | 302.53 | 406.52 | 126.35 | 62.59 | 43.27 |
| 3386 | 302.36 | 407.11 | 127.23 | 62.64 | 43.32 |
| 3388 | 302.17 | 407.73 | 128.12 | 62.7  | 43.38 |
| 3390 | 302.02 | 408.45 | 129.2  | 62.77 | 43.45 |
| 3392 | 301.85 | 409.05 | 130.13 | 62.83 | 43.5  |
| 3394 | 301.68 | 409.66 | 131.05 | 62.87 | 43.56 |
| 3396 | 301.5  | 410.38 | 131.98 | 62.92 | 43.64 |
| 3398 | 301.33 | 410.99 | 133.09 | 62.98 | 43.67 |
| 3400 | 301.2  | 411.64 | 134.05 | 63.06 | 43.76 |
| 3402 | 301.01 | 412.21 | 134.97 | 63.09 | 43.82 |
| 3404 | 300.84 | 412.79 | 135.93 | 63.13 | 43.85 |
| 3406 | 300.64 | 413.4  | 136.88 | 63.16 | 43.9  |
| 3408 | 300.47 | 414.11 | 138.03 | 63.23 | 43.95 |
| 3410 | 300.31 | 414.71 | 139    | 63.28 | 44    |
| 3412 | 300.14 | 415.33 | 140    | 63.35 | 44.05 |
| 3414 | 299.99 | 416.03 | 141.19 | 63.41 | 44.13 |
| 3416 | 299.82 | 416.61 | 142.16 | 63.43 | 44.16 |
| 3418 | 299.64 | 417.18 | 143.14 | 63.46 | 44.19 |
| 3420 | 299.53 | 417.84 | 144.22 | 63.57 | 44.29 |
| 3422 | 299.35 | 418.51 | 145.23 | 63.61 | 44.31 |
| 3424 | 299.16 | 419.06 | 146.4  | 63.62 | 44.33 |
| 3426 | 299.01 | 419.64 | 147.43 | 63.68 | 44.37 |
| 3428 | 298.84 | 420.25 | 148.48 | 63.75 | 44.44 |
| 3430 | 298.68 | 420.94 | 149.72 | 63.8  | 44.5  |
| 3432 | 298.52 | 421.51 | 150.76 | 63.84 | 44.53 |
| 3434 | 298.36 | 422.08 | 151.83 | 63.89 | 44.61 |
| 3436 | 298.21 | 422.67 | 152.91 | 63.95 | 44.67 |
| 3438 | 298.04 | 423.26 | 154.01 | 64.01 | 44.75 |
| 3440 | 297.89 | 423.91 | 155.28 | 64.05 | 44.81 |
| 3442 | 297.73 | 424.46 | 156.36 | 64.1  | 44.87 |
| 3444 | 297.56 | 425.03 | 157.45 | 64.13 | 44.92 |
| 3446 | 297.44 | 425.72 | 158.59 | 64.21 | 44.99 |
| 3448 | 297.3  | 426.29 | 159.9  | 64.26 | 45.05 |
| 3450 | 297.16 | 426.85 | 161.02 | 64.31 | 45.11 |
| 3452 | 296.99 | 427.41 | 162.15 | 64.36 | 45.16 |

|      |        |        |        |       |       |
|------|--------|--------|--------|-------|-------|
| 3454 | 296.85 | 428.07 | 163.46 | 64.4  | 45.21 |
| 3456 | 296.7  | 428.63 | 164.6  | 64.44 | 45.27 |
| 3458 | 296.55 | 429.18 | 165.73 | 64.5  | 45.32 |
| 3460 | 296.41 | 429.73 | 166.88 | 64.55 | 45.37 |
| 3462 | 296.25 | 430.37 | 168.04 | 64.6  | 45.42 |
| 3464 | 296.11 | 430.92 | 169.38 | 64.65 | 45.47 |
| 3466 | 295.97 | 431.46 | 170.53 | 64.7  | 45.53 |
| 3468 | 295.81 | 432    | 171.68 | 64.75 | 45.59 |
| 3470 | 295.67 | 432.64 | 173.06 | 64.8  | 45.65 |
| 3472 | 295.52 | 433.16 | 174.2  | 64.86 | 45.69 |
| 3474 | 295.4  | 433.71 | 175.38 | 64.92 | 45.76 |
| 3476 | 295.25 | 434.24 | 176.55 | 64.96 | 45.81 |
| 3478 | 295.11 | 434.88 | 177.71 | 65.01 | 45.88 |
| 3480 | 294.97 | 435.4  | 179.06 | 65.05 | 45.93 |
| 3482 | 294.83 | 435.94 | 180.24 | 65.11 | 46    |
| 3484 | 294.69 | 436.47 | 181.41 | 65.15 | 46.06 |
| 3486 | 294.56 | 437.07 | 182.77 | 65.2  | 46.11 |
| 3488 | 294.42 | 437.6  | 183.94 | 65.26 | 46.18 |
| 3490 | 294.29 | 438.11 | 185.12 | 65.31 | 46.23 |
| 3492 | 294.16 | 438.63 | 186.3  | 65.35 | 46.28 |
| 3494 | 293.97 | 439.2  | 187.45 | 65.37 | 46.31 |
| 3496 | 293.87 | 439.75 | 188.83 | 65.44 | 46.39 |
| 3498 | 293.74 | 440.26 | 190    | 65.49 | 46.45 |
| 3500 | 293.59 | 440.77 | 191.16 | 65.53 | 46.5  |
| 3502 | 293.46 | 441.37 | 192.52 | 65.58 | 46.57 |
| 3504 | 293.34 | 441.88 | 193.7  | 65.64 | 46.62 |
| 3506 | 293.19 | 442.38 | 194.86 | 65.69 | 46.67 |
| 3508 | 293.06 | 442.99 | 196.05 | 65.75 | 46.73 |
| 3510 | 292.92 | 443.47 | 197.39 | 65.79 | 46.78 |
| 3512 | 292.81 | 443.97 | 198.58 | 65.86 | 46.87 |
| 3514 | 292.67 | 444.45 | 199.75 | 65.89 | 46.9  |
| 3516 | 292.57 | 444.97 | 200.95 | 65.96 | 46.97 |
| 3518 | 292.4  | 445.5  | 202.09 | 65.98 | 47.01 |
| 3520 | 292.27 | 445.97 | 203.44 | 66.03 | 47.06 |
| 3522 | 292.15 | 446.46 | 204.62 | 66.07 | 47.12 |
| 3524 | 292    | 446.93 | 205.8  | 66.13 | 47.2  |
| 3526 | 291.88 | 447.48 | 207.15 | 66.16 | 47.25 |
| 3528 | 291.74 | 447.94 | 208.3  | 66.2  | 47.3  |
| 3530 | 291.64 | 448.44 | 209.47 | 66.27 | 47.38 |
| 3532 | 291.47 | 448.96 | 210.63 | 66.32 | 47.43 |
| 3534 | 291.34 | 449.41 | 211.98 | 66.36 | 47.46 |
| 3536 | 291.21 | 449.87 | 213.15 | 66.41 | 47.52 |
| 3538 | 291.09 | 450.32 | 214.31 | 66.45 | 47.58 |
| 3540 | 290.93 | 450.85 | 215.47 | 66.49 | 47.64 |



|      |        |        |        |       |       |
|------|--------|--------|--------|-------|-------|
| 3542 | 290.83 | 451.32 | 216.67 | 66.55 | 47.72 |
| 3544 | 290.69 | 451.74 | 217.98 | 66.59 | 47.78 |
| 3546 | 290.57 | 452.21 | 219.17 | 66.64 | 47.87 |
| 3548 | 290.43 | 452.64 | 220.32 | 66.68 | 47.92 |
| 3550 | 290.28 | 453.15 | 221.68 | 66.72 | 47.98 |
| 3552 | 290.16 | 453.58 | 222.84 | 66.78 | 48.06 |
| 3554 | 290.06 | 454.03 | 224.03 | 66.86 | 48.13 |
| 3556 | 289.95 | 454.48 | 225.21 | 66.92 | 48.22 |
| 3558 | 289.83 | 455    | 226.39 | 66.98 | 48.3  |
| 3560 | 289.7  | 455.42 | 227.72 | 67.02 | 48.34 |
| 3562 | 289.52 | 455.77 | 228.84 | 67.03 | 48.37 |
| 3564 | 289.39 | 456.29 | 229.99 | 67.08 | 48.43 |
| 3566 | 289.28 | 456.71 | 231.37 | 67.13 | 48.5  |
| 3568 | 289.19 | 457.16 | 232.54 | 67.21 | 48.6  |
| 3570 | 289.04 | 457.55 | 233.68 | 67.22 | 48.63 |
| 3572 | 288.91 | 457.96 | 234.85 | 67.28 | 48.69 |
| 3574 | 288.76 | 458.44 | 236.01 | 67.33 | 48.75 |
| 3576 | 288.68 | 458.88 | 237.39 | 67.41 | 48.83 |
| 3578 | 288.54 | 459.27 | 238.54 | 67.47 | 48.88 |
| 3580 | 288.38 | 459.62 | 239.67 | 67.48 | 48.92 |
| 3582 | 288.28 | 460.11 | 240.83 | 67.54 | 48.99 |
| 3584 | 288.13 | 460.49 | 242.18 | 67.58 | 49.03 |
| 3586 | 288.03 | 460.89 | 243.35 | 67.66 | 49.13 |
| 3588 | 287.89 | 461.27 | 244.52 | 67.7  | 49.17 |
| 3590 | 287.77 | 461.74 | 245.87 | 67.75 | 49.23 |
| 3592 | 287.63 | 462.11 | 247.03 | 67.8  | 49.32 |
| 3594 | 287.49 | 462.49 | 248.17 | 67.83 | 49.36 |
| 3596 | 287.37 | 462.87 | 249.34 | 67.88 | 49.44 |
| 3598 | 287.27 | 463.35 | 250.73 | 67.96 | 49.51 |
| 3600 | 287.17 | 463.74 | 251.9  | 68.05 | 49.59 |
| 3602 | 287.07 | 464.13 | 253.09 | 68.11 | 49.66 |
| 3604 | 286.95 | 464.52 | 254.26 | 68.17 | 49.75 |
| 3606 | 286.79 | 464.92 | 255.39 | 68.2  | 49.79 |
| 3608 | 286.65 | 465.28 | 256.73 | 68.25 | 49.85 |
| 3610 | 286.53 | 465.65 | 257.88 | 68.3  | 49.91 |
| 3612 | 286.39 | 466.02 | 259.05 | 68.34 | 49.97 |
| 3614 | 286.27 | 466.44 | 260.22 | 68.38 | 50.03 |
| 3616 | 286.15 | 466.8  | 261.56 | 68.44 | 50.1  |
| 3618 | 286.02 | 467.15 | 262.71 | 68.49 | 50.18 |
| 3620 | 285.91 | 467.52 | 263.87 | 68.53 | 50.26 |
| 3622 | 285.74 | 467.9  | 265.19 | 68.57 | 50.3  |
| 3624 | 285.65 | 468.27 | 266.37 | 68.65 | 50.39 |
| 3626 | 285.54 | 468.63 | 267.52 | 68.7  | 50.46 |
| 3628 | 285.4  | 468.94 | 268.64 | 68.72 | 50.5  |

|      |        |        |        |       |       |
|------|--------|--------|--------|-------|-------|
| 3630 | 285.26 | 469.34 | 269.79 | 68.77 | 50.56 |
| 3632 | 285.18 | 469.73 | 271.18 | 68.87 | 50.68 |
| 3634 | 285.03 | 470.03 | 272.28 | 68.88 | 50.73 |
| 3636 | 284.91 | 470.38 | 273.44 | 68.94 | 50.81 |
| 3638 | 284.8  | 470.77 | 274.79 | 69.01 | 50.87 |
| 3640 | 284.69 | 471.13 | 275.95 | 69.08 | 50.94 |
| 3642 | 284.58 | 471.47 | 277.07 | 69.11 | 51.01 |
| 3644 | 284.47 | 471.81 | 278.23 | 69.17 | 51.08 |
| 3646 | 284.33 | 472.14 | 279.37 | 69.22 | 51.14 |
| 3648 | 284.24 | 472.54 | 280.72 | 69.32 | 51.23 |
| 3650 | 284.1  | 472.84 | 281.82 | 69.35 | 51.27 |
| 3652 | 283.99 | 473.2  | 282.98 | 69.44 | 51.34 |
| 3654 | 283.88 | 473.57 | 284.11 | 69.49 | 51.42 |
| 3656 | 283.78 | 473.91 | 285.44 | 69.56 | 51.49 |
| 3658 | 283.69 | 474.26 | 286.57 | 69.63 | 51.58 |
| 3660 | 283.56 | 474.59 | 287.7  | 69.68 | 51.65 |
| 3662 | 283.47 | 474.93 | 288.83 | 69.76 | 51.73 |
| 3664 | 283.34 | 475.3  | 290.13 | 69.81 | 51.81 |
| 3666 | 283.22 | 475.62 | 291.25 | 69.87 | 51.89 |
| 3668 | 283.08 | 475.91 | 292.34 | 69.9  | 51.93 |
| 3670 | 282.98 | 476.32 | 293.47 | 69.98 | 52.03 |
| 3672 | 282.83 | 476.61 | 294.74 | 70.01 | 52.08 |
| 3674 | 282.73 | 476.94 | 295.85 | 70.08 | 52.16 |
| 3676 | 282.64 | 477.28 | 296.99 | 70.17 | 52.26 |
| 3678 | 282.52 | 477.61 | 298.1  | 70.24 | 52.34 |
| 3680 | 282.42 | 477.99 | 299.39 | 70.33 | 52.46 |
| 3682 | 282.3  | 478.27 | 300.48 | 70.39 | 52.53 |
| 3684 | 282.2  | 478.6  | 301.6  | 70.45 | 52.63 |
| 3686 | 282.07 | 478.92 | 302.71 | 70.53 | 52.72 |
| 3688 | 281.96 | 479.28 | 303.98 | 70.59 | 52.81 |
| 3690 | 281.85 | 479.6  | 305.08 | 70.66 | 52.91 |
| 3692 | 281.74 | 479.91 | 306.17 | 70.73 | 53    |
| 3694 | 281.62 | 480.28 | 307.26 | 70.79 | 53.1  |
| 3696 | 281.51 | 480.58 | 308.54 | 70.86 | 53.18 |
| 3698 | 281.41 | 480.88 | 309.62 | 70.93 | 53.29 |
| 3700 | 281.3  | 481.2  | 310.71 | 71    | 53.39 |
| 3702 | 281.19 | 481.53 | 311.8  | 71.09 | 53.49 |
| 3704 | 281.07 | 481.86 | 312.89 | 71.14 | 53.57 |
| 3706 | 281    | 482.19 | 314.19 | 71.27 | 53.71 |
| 3708 | 280.91 | 482.49 | 315.27 | 71.34 | 53.8  |
| 3710 | 280.73 | 482.8  | 316.31 | 71.38 | 53.85 |
| 3712 | 280.64 | 483.12 | 317.58 | 71.47 | 53.95 |
| 3714 | 280.5  | 483.38 | 318.63 | 71.53 | 54.04 |
| 3716 | 280.42 | 483.69 | 319.71 | 71.62 | 54.13 |

|      |        |        |        |       |       |
|------|--------|--------|--------|-------|-------|
| 3718 | 280.29 | 483.97 | 320.78 | 71.69 | 54.2  |
| 3720 | 280.16 | 484.3  | 322.01 | 71.78 | 54.29 |
| 3722 | 280.05 | 484.58 | 323.08 | 71.84 | 54.39 |
| 3724 | 279.93 | 484.86 | 324.15 | 71.91 | 54.47 |
| 3726 | 279.8  | 485.13 | 325.21 | 71.98 | 54.56 |
| 3728 | 279.68 | 485.45 | 326.44 | 72.04 | 54.64 |
| 3730 | 279.56 | 485.71 | 327.49 | 72.12 | 54.71 |
| 3732 | 279.46 | 486    | 328.55 | 72.21 | 54.83 |
| 3734 | 279.33 | 486.31 | 329.59 | 72.27 | 54.92 |
| 3736 | 279.22 | 486.59 | 330.83 | 72.37 | 55.02 |
| 3738 | 279.1  | 486.85 | 331.87 | 72.41 | 55.12 |
| 3740 | 278.98 | 487.12 | 332.91 | 72.5  | 55.22 |
| 3742 | 278.86 | 487.39 | 333.96 | 72.57 | 55.33 |
| 3744 | 278.74 | 487.69 | 335.19 | 72.65 | 55.42 |
| 3746 | 278.63 | 487.96 | 336.23 | 72.72 | 55.53 |
| 3748 | 278.53 | 488.24 | 337.27 | 72.8  | 55.65 |
| 3750 | 278.38 | 488.48 | 338.28 | 72.86 | 55.73 |
| 3752 | 278.28 | 488.82 | 339.52 | 72.94 | 55.85 |
| 3754 | 278.18 | 489.1  | 340.58 | 73.06 | 55.99 |
| 3756 | 278.02 | 489.31 | 341.56 | 73.09 | 56.04 |
| 3758 | 277.93 | 489.59 | 342.61 | 73.18 | 56.16 |
| 3760 | 277.78 | 489.87 | 343.63 | 73.24 | 56.26 |
| 3762 | 277.63 | 490.09 | 344.78 | 73.28 | 56.33 |
| 3764 | 277.51 | 490.33 | 345.79 | 73.35 | 56.42 |
| 3766 | 277.37 | 490.57 | 346.82 | 73.43 | 56.51 |
| 3768 | 277.24 | 490.85 | 348.01 | 73.49 | 56.62 |
| 3770 | 277.12 | 491.1  | 349.02 | 73.56 | 56.71 |
| 3772 | 277    | 491.34 | 350.02 | 73.63 | 56.82 |
| 3774 | 276.86 | 491.61 | 351.04 | 73.7  | 56.91 |
| 3776 | 276.73 | 491.85 | 352.2  | 73.76 | 57.01 |
| 3778 | 276.61 | 492.09 | 353.2  | 73.84 | 57.11 |
| 3780 | 276.49 | 492.32 | 354.21 | 73.91 | 57.21 |
| 3782 | 276.39 | 492.57 | 355.22 | 74    | 57.33 |
| 3784 | 276.21 | 492.81 | 356.17 | 74.04 | 57.41 |
| 3786 | 276.12 | 493.06 | 357.36 | 74.15 | 57.53 |
| 3788 | 275.98 | 493.28 | 358.34 | 74.2  | 57.64 |
| 3790 | 275.82 | 493.5  | 359.32 | 74.25 | 57.75 |
| 3792 | 275.69 | 493.76 | 360.48 | 74.31 | 57.84 |
| 3794 | 275.54 | 493.95 | 361.42 | 74.36 | 57.95 |
| 3796 | 275.41 | 494.18 | 362.42 | 74.44 | 58.05 |
| 3798 | 275.31 | 494.41 | 363.4  | 74.52 | 58.16 |
| 3800 | 275.18 | 494.7  | 364.39 | 74.61 | 58.28 |
| 3802 | 275.09 | 494.95 | 365.57 | 74.72 | 58.43 |
| 3804 | 274.93 | 495.13 | 366.5  | 74.75 | 58.51 |

|      |        |        |        |       |       |
|------|--------|--------|--------|-------|-------|
| 3806 | 274.78 | 495.32 | 367.46 | 74.81 | 58.61 |
| 3808 | 274.63 | 495.58 | 368.42 | 74.88 | 58.71 |
| 3810 | 274.54 | 495.82 | 369.58 | 75    | 58.88 |
| 3812 | 274.37 | 496    | 370.52 | 75.04 | 58.99 |
| 3814 | 274.21 | 496.22 | 371.45 | 75.08 | 59.09 |
| 3816 | 274.09 | 496.44 | 372.58 | 75.18 | 59.24 |
| 3818 | 273.93 | 496.62 | 373.5  | 75.21 | 59.32 |
| 3820 | 273.79 | 496.83 | 374.44 | 75.28 | 59.44 |
| 3822 | 273.65 | 497.03 | 375.39 | 75.34 | 59.55 |
| 3824 | 273.51 | 497.27 | 376.35 | 75.45 | 59.69 |
| 3826 | 273.4  | 497.48 | 377.46 | 75.53 | 59.8  |
| 3828 | 273.22 | 497.65 | 378.36 | 75.56 | 59.89 |
| 3830 | 273.06 | 497.84 | 379.28 | 75.62 | 60.01 |
| 3832 | 272.93 | 498.07 | 380.36 | 75.68 | 60.12 |
| 3834 | 272.79 | 498.28 | 381.29 | 75.78 | 60.26 |
| 3836 | 272.65 | 498.47 | 382.21 | 75.83 | 60.37 |
| 3838 | 272.5  | 498.66 | 383.13 | 75.9  | 60.47 |
| 3840 | 272.34 | 498.88 | 384.2  | 75.97 | 60.59 |
| 3842 | 272.2  | 499.07 | 385.12 | 76.03 | 60.7  |
| 3844 | 272.05 | 499.27 | 386.03 | 76.1  | 60.81 |
| 3846 | 271.93 | 499.5  | 386.97 | 76.2  | 60.95 |
| 3848 | 271.77 | 499.7  | 387.85 | 76.25 | 61.03 |
| 3850 | 271.62 | 499.89 | 388.9  | 76.32 | 61.12 |
| 3852 | 271.46 | 500.06 | 389.79 | 76.37 | 61.22 |
| 3854 | 271.29 | 500.24 | 390.7  | 76.43 | 61.32 |
| 3856 | 271.14 | 500.44 | 391.74 | 76.48 | 61.42 |
| 3858 | 270.99 | 500.61 | 392.62 | 76.53 | 61.52 |
| 3860 | 270.85 | 500.79 | 393.51 | 76.59 | 61.62 |
| 3862 | 270.71 | 500.96 | 394.41 | 76.66 | 61.72 |
| 3864 | 270.53 | 501.16 | 395.29 | 76.72 | 61.8  |
| 3866 | 270.39 | 501.32 | 396.33 | 76.77 | 61.9  |
| 3868 | 270.24 | 501.49 | 397.2  | 76.85 | 62.01 |
| 3870 | 270.06 | 501.66 | 398.07 | 76.9  | 62.1  |
| 3872 | 269.93 | 501.86 | 399.11 | 76.97 | 62.2  |
| 3874 | 269.74 | 501.99 | 399.96 | 77.03 | 62.28 |
| 3876 | 269.63 | 502.17 | 400.85 | 77.09 | 62.4  |
| 3878 | 269.49 | 502.34 | 401.73 | 77.17 | 62.53 |
| 3880 | 269.3  | 502.51 | 402.71 | 77.21 | 62.61 |
| 3882 | 269.13 | 502.65 | 403.56 | 77.25 | 62.69 |
| 3884 | 268.98 | 502.82 | 404.42 | 77.3  | 62.78 |
| 3886 | 268.83 | 502.96 | 405.28 | 77.35 | 62.88 |
| 3888 | 268.64 | 503.14 | 406.13 | 77.4  | 62.99 |
| 3890 | 268.49 | 503.29 | 407.12 | 77.47 | 63.1  |
| 3892 | 268.34 | 503.43 | 407.97 | 77.52 | 63.22 |

|      |        |        |        |       |       |
|------|--------|--------|--------|-------|-------|
| 3894 | 268.16 | 503.58 | 408.81 | 77.57 | 63.33 |
| 3896 | 268    | 503.75 | 409.79 | 77.62 | 63.43 |
| 3898 | 267.84 | 503.9  | 410.64 | 77.7  | 63.53 |
| 3900 | 267.69 | 504.05 | 411.48 | 77.76 | 63.64 |
| 3902 | 267.53 | 504.2  | 412.32 | 77.81 | 63.74 |
| 3904 | 267.35 | 504.35 | 413.15 | 77.86 | 63.84 |
| 3906 | 267.19 | 504.51 | 414.12 | 77.92 | 63.95 |
| 3908 | 267.06 | 504.68 | 414.98 | 78    | 64.07 |
| 3910 | 266.93 | 504.84 | 415.81 | 78.08 | 64.18 |
| 3912 | 266.73 | 504.95 | 416.63 | 78.12 | 64.24 |
| 3914 | 266.54 | 505.07 | 417.56 | 78.14 | 64.3  |
| 3916 | 266.37 | 505.18 | 418.37 | 78.2  | 64.39 |
| 3918 | 266.22 | 505.3  | 419.18 | 78.26 | 64.49 |
| 3920 | 266.05 | 505.41 | 420    | 78.31 | 64.57 |
| 3922 | 265.87 | 505.54 | 420.94 | 78.37 | 64.65 |
| 3924 | 265.71 | 505.66 | 421.75 | 78.44 | 64.78 |
| 3926 | 265.56 | 505.77 | 422.56 | 78.49 | 64.86 |
| 3928 | 265.41 | 505.9  | 423.39 | 78.58 | 64.99 |
| 3930 | 265.26 | 506.03 | 424.33 | 78.64 | 65.09 |
| 3932 | 265.1  | 506.12 | 425.13 | 78.7  | 65.18 |
| 3934 | 264.92 | 506.2  | 425.91 | 78.73 | 65.24 |
| 3936 | 264.74 | 506.31 | 426.7  | 78.81 | 65.34 |
| 3938 | 264.59 | 506.39 | 427.62 | 78.88 | 65.41 |
| 3940 | 264.4  | 506.43 | 428.39 | 78.93 | 65.51 |
| 3942 | 264.22 | 506.49 | 429.15 | 78.97 | 65.57 |
| 3944 | 264.08 | 506.57 | 429.92 | 79.03 | 65.64 |
| 3946 | 263.9  | 506.64 | 430.85 | 79.12 | 65.77 |
| 3948 | 263.68 | 506.65 | 431.56 | 79.15 | 65.82 |
| 3950 | 263.55 | 506.72 | 432.36 | 79.26 | 65.94 |
| 3952 | 263.39 | 506.77 | 433.15 | 79.35 | 66.04 |
| 3954 | 263.22 | 506.8  | 433.88 | 79.41 | 66.11 |
| 3956 | 263.01 | 506.77 | 434.73 | 79.47 | 66.17 |
| 3958 | 262.85 | 506.77 | 435.48 | 79.55 | 66.27 |
| 3960 | 262.68 | 506.77 | 436.25 | 79.64 | 66.36 |
| 3962 | 262.54 | 506.79 | 437.12 | 79.76 | 66.48 |
| 3964 | 262.33 | 506.73 | 437.82 | 79.82 | 66.54 |
| 3966 | 262.16 | 506.7  | 438.55 | 79.9  | 66.61 |
| 3968 | 261.99 | 506.67 | 439.28 | 79.99 | 66.72 |
| 3970 | 261.86 | 506.68 | 440.05 | 80.14 | 66.85 |
| 3972 | 261.69 | 506.64 | 440.88 | 80.27 | 66.94 |
| 3974 | 261.51 | 506.57 | 441.58 | 80.35 | 67.05 |
| 3976 | 261.34 | 506.53 | 442.3  | 80.46 | 67.14 |
| 3978 | 261.15 | 506.5  | 443.14 | 80.58 | 67.25 |
| 3980 | 260.99 | 506.46 | 443.83 | 80.73 | 67.37 |

|      |        |        |        |        |       |
|------|--------|--------|--------|--------|-------|
| 3982 | 260.79 | 506.38 | 444.49 | 80.82  | 67.43 |
| 3984 | 260.63 | 506.34 | 445.18 | 80.97  | 67.54 |
| 3986 | 260.41 | 506.29 | 445.85 | 81.09  | 67.62 |
| 3988 | 260.27 | 506.28 | 446.68 | 81.25  | 67.76 |
| 3990 | 260.09 | 506.24 | 447.34 | 81.4   | 67.87 |
| 3992 | 259.93 | 506.25 | 448.05 | 81.59  | 68    |
| 3994 | 259.74 | 506.22 | 448.84 | 81.77  | 68.09 |
| 3996 | 259.56 | 506.19 | 449.49 | 81.94  | 68.16 |
| 3998 | 259.39 | 506.18 | 450.15 | 82.12  | 68.28 |
| 4000 | 259.21 | 506.17 | 450.81 | 82.35  | 68.38 |
| 4002 | 259.02 | 506.17 | 451.47 | 82.59  | 68.47 |
| 4004 | 258.85 | 506.17 | 452.25 | 82.87  | 68.6  |
| 4006 | 258.7  | 506.2  | 452.94 | 83.13  | 68.71 |
| 4008 | 258.51 | 506.18 | 453.56 | 83.38  | 68.79 |
| 4010 | 258.32 | 506.21 | 454.22 | 83.69  | 68.89 |
| 4012 | 258.16 | 506.24 | 455    | 84.02  | 69.01 |
| 4014 | 258.02 | 506.27 | 455.66 | 84.43  | 69.12 |
| 4016 | 257.85 | 506.3  | 456.3  | 84.79  | 69.21 |
| 4018 | 257.69 | 506.36 | 456.98 | 85.17  | 69.34 |
| 4020 | 257.52 | 506.38 | 457.6  | 85.52  | 69.42 |
| 4022 | 257.36 | 506.41 | 458.35 | 85.99  | 69.54 |
| 4024 | 257.17 | 506.41 | 458.98 | 86.4   | 69.61 |
| 4026 | 256.98 | 506.42 | 459.59 | 86.84  | 69.7  |
| 4028 | 256.86 | 506.5  | 460.38 | 87.35  | 69.84 |
| 4030 | 256.68 | 506.51 | 461    | 87.91  | 69.94 |
| 4032 | 256.51 | 506.52 | 461.61 | 88.41  | 70.01 |
| 4034 | 256.37 | 506.6  | 462.27 | 88.98  | 70.13 |
| 4036 | 256.2  | 506.62 | 463    | 89.53  | 70.21 |
| 4038 | 256.01 | 506.62 | 463.6  | 90.19  | 70.27 |
| 4040 | 255.85 | 506.63 | 464.19 | 90.8   | 70.34 |
| 4042 | 255.71 | 506.69 | 464.82 | 91.46  | 70.43 |
| 4044 | 255.54 | 506.72 | 465.55 | 92.25  | 70.53 |
| 4046 | 255.36 | 506.74 | 466.14 | 92.94  | 70.61 |
| 4048 | 255.22 | 506.76 | 466.74 | 93.67  | 70.71 |
| 4050 | 255.04 | 506.79 | 467.34 | 94.43  | 70.8  |
| 4052 | 254.89 | 506.84 | 468.08 | 95.21  | 70.89 |
| 4054 | 254.77 | 506.91 | 468.7  | 96.18  | 71.03 |
| 4056 | 254.59 | 506.92 | 469.28 | 97.02  | 71.09 |
| 4058 | 254.39 | 506.94 | 469.85 | 97.83  | 71.14 |
| 4060 | 254.23 | 506.98 | 470.55 | 98.87  | 71.22 |
| 4062 | 254.09 | 507.01 | 471.14 | 99.78  | 71.34 |
| 4064 | 253.96 | 507.07 | 471.77 | 100.73 | 71.45 |
| 4066 | 253.8  | 507.09 | 472.35 | 101.66 | 71.54 |
| 4068 | 253.63 | 507.14 | 472.95 | 102.65 | 71.63 |

|      |        |        |        |        |       |
|------|--------|--------|--------|--------|-------|
| 4070 | 253.47 | 507.17 | 473.61 | 103.62 | 71.7  |
| 4072 | 253.31 | 507.2  | 474.19 | 104.79 | 71.78 |
| 4074 | 253.14 | 507.24 | 474.78 | 105.84 | 71.88 |
| 4076 | 252.97 | 507.27 | 475.43 | 106.87 | 71.94 |
| 4078 | 252.78 | 507.28 | 475.99 | 108.07 | 72    |
| 4080 | 252.63 | 507.31 | 476.55 | 109.14 | 72.08 |
| 4082 | 252.44 | 507.33 | 477.11 | 110.22 | 72.15 |
| 4084 | 252.3  | 507.4  | 477.77 | 111.35 | 72.24 |
| 4086 | 252.18 | 507.48 | 478.37 | 112.51 | 72.36 |
| 4088 | 251.99 | 507.48 | 478.89 | 113.81 | 72.44 |
| 4090 | 251.83 | 507.53 | 479.46 | 114.98 | 72.53 |
| 4092 | 251.69 | 507.59 | 480.04 | 116.16 | 72.66 |
| 4094 | 251.54 | 507.62 | 480.67 | 117.55 | 72.77 |
| 4096 | 251.39 | 507.69 | 481.22 | 118.78 | 72.93 |
| 4098 | 251.19 | 507.72 | 481.77 | 119.98 | 73.05 |
| 4100 | 251.04 | 507.79 | 482.4  | 121.21 | 73.21 |
| 4102 | 250.92 | 507.87 | 482.96 | 122.68 | 73.42 |
| 4104 | 250.76 | 507.91 | 483.5  | 123.93 | 73.58 |
| 4106 | 250.62 | 507.98 | 484.05 | 125.24 | 73.77 |
| 4108 | 250.48 | 508.06 | 484.6  | 126.55 | 73.98 |
| 4110 | 250.29 | 508.09 | 485.19 | 127.81 | 74.14 |
| 4112 | 250.15 | 508.15 | 485.71 | 129.34 | 74.41 |
| 4114 | 250.03 | 508.23 | 486.26 | 130.71 | 74.68 |
| 4116 | 249.88 | 508.3  | 486.81 | 132.06 | 74.95 |
| 4118 | 249.69 | 508.33 | 487.37 | 133.59 | 75.2  |
| 4120 | 249.59 | 508.42 | 487.92 | 134.99 | 75.6  |
| 4122 | 249.46 | 508.5  | 488.46 | 136.37 | 75.91 |
| 4124 | 249.31 | 508.57 | 488.99 | 137.78 | 76.25 |
| 4126 | 249.15 | 508.64 | 489.58 | 139.39 | 76.57 |
| 4128 | 248.99 | 508.68 | 490.05 | 140.77 | 76.93 |
| 4130 | 248.85 | 508.75 | 490.57 | 142.2  | 77.26 |
| 4132 | 248.73 | 508.85 | 491.09 | 143.66 | 77.6  |
| 4134 | 248.61 | 508.92 | 491.69 | 145.12 | 77.96 |
| 4136 | 248.5  | 509.01 | 492.22 | 146.84 | 78.38 |
| 4138 | 248.38 | 509.08 | 492.71 | 148.3  | 78.74 |
| 4140 | 248.22 | 509.15 | 493.2  | 149.76 | 79.1  |
| 4142 | 248.07 | 509.21 | 493.75 | 151.45 | 79.46 |
| 4144 | 247.94 | 509.28 | 494.26 | 152.96 | 79.92 |
| 4146 | 247.86 | 509.38 | 494.76 | 154.47 | 80.31 |
| 4148 | 247.7  | 509.46 | 495.26 | 155.97 | 80.71 |
| 4150 | 247.55 | 509.51 | 495.76 | 157.44 | 81.08 |
| 4152 | 247.46 | 509.63 | 496.29 | 159.26 | 81.54 |
| 4154 | 247.37 | 509.73 | 496.79 | 160.8  | 82.03 |
| 4156 | 247.24 | 509.81 | 497.27 | 162.33 | 82.47 |

|      |        |        |        |        |        |
|------|--------|--------|--------|--------|--------|
| 4158 | 247.09 | 509.88 | 497.73 | 163.83 | 82.9   |
| 4160 | 247    | 510    | 498.3  | 165.67 | 83.43  |
| 4162 | 246.86 | 510.07 | 498.74 | 167.19 | 83.82  |
| 4164 | 246.75 | 510.18 | 499.24 | 168.76 | 84.3   |
| 4166 | 246.66 | 510.29 | 499.72 | 170.34 | 84.76  |
| 4168 | 246.48 | 510.35 | 500.2  | 172.11 | 85.21  |
| 4170 | 246.36 | 510.46 | 500.68 | 173.69 | 85.66  |
| 4172 | 246.27 | 510.59 | 501.16 | 175.3  | 86.13  |
| 4174 | 246.17 | 510.72 | 501.71 | 176.89 | 86.56  |
| 4176 | 246.06 | 510.82 | 502.15 | 178.74 | 87.08  |
| 4178 | 245.95 | 510.93 | 502.63 | 180.34 | 87.54  |
| 4180 | 245.84 | 511.02 | 503.07 | 181.93 | 87.98  |
| 4182 | 245.74 | 511.15 | 503.55 | 183.56 | 88.49  |
| 4184 | 245.62 | 511.28 | 504.07 | 185.17 | 88.97  |
| 4186 | 245.49 | 511.37 | 504.5  | 187.03 | 89.5   |
| 4188 | 245.37 | 511.47 | 504.95 | 188.65 | 89.98  |
| 4190 | 245.27 | 511.61 | 505.38 | 190.28 | 90.49  |
| 4192 | 245.15 | 511.73 | 505.89 | 192.17 | 90.99  |
| 4194 | 245.07 | 511.88 | 506.35 | 193.84 | 91.62  |
| 4196 | 244.97 | 512.03 | 506.8  | 195.48 | 92.13  |
| 4198 | 244.84 | 512.15 | 507.3  | 197.11 | 92.65  |
| 4200 | 244.75 | 512.28 | 507.75 | 199.03 | 93.18  |
| 4202 | 244.64 | 512.4  | 508.19 | 200.71 | 93.8   |
| 4204 | 244.54 | 512.52 | 508.62 | 202.36 | 94.34  |
| 4206 | 244.43 | 512.65 | 509.04 | 204.04 | 94.88  |
| 4208 | 244.35 | 512.83 | 509.56 | 206    | 95.44  |
| 4210 | 244.24 | 512.95 | 509.99 | 207.69 | 96.08  |
| 4212 | 244.13 | 513.09 | 510.42 | 209.36 | 96.65  |
| 4214 | 244.05 | 513.28 | 510.96 | 211.06 | 97.25  |
| 4216 | 243.96 | 513.41 | 511.39 | 213.08 | 97.85  |
| 4218 | 243.91 | 513.6  | 511.84 | 214.81 | 98.54  |
| 4220 | 243.81 | 513.73 | 512.26 | 216.53 | 99.12  |
| 4222 | 243.71 | 513.89 | 512.69 | 218.23 | 99.73  |
| 4224 | 243.61 | 514.05 | 513.1  | 219.94 | 100.31 |
| 4226 | 243.52 | 514.21 | 513.62 | 221.96 | 101.02 |
| 4228 | 243.4  | 514.36 | 514.05 | 223.68 | 101.65 |
| 4230 | 243.3  | 514.5  | 514.46 | 225.42 | 102.27 |
| 4232 | 243.2  | 514.69 | 514.94 | 227.14 | 102.86 |
| 4234 | 243.14 | 514.87 | 515.39 | 229.19 | 103.59 |
| 4236 | 243.02 | 515.01 | 515.79 | 230.92 | 104.16 |
| 4238 | 242.89 | 515.18 | 516.19 | 232.66 | 104.77 |
| 4240 | 242.8  | 515.33 | 516.68 | 234.69 | 105.38 |
| 4242 | 242.72 | 515.49 | 517.09 | 236.44 | 106.12 |
| 4244 | 242.63 | 515.67 | 517.51 | 238.21 | 106.76 |



|      |        |        |        |        |        |
|------|--------|--------|--------|--------|--------|
| 4246 | 242.56 | 515.87 | 517.97 | 240    | 107.41 |
| 4248 | 242.49 | 516.06 | 518.45 | 241.77 | 108.02 |
| 4250 | 242.39 | 516.19 | 518.87 | 243.84 | 108.65 |
| 4252 | 242.29 | 516.32 | 519.26 | 245.6  | 109.36 |
| 4254 | 242.18 | 516.49 | 519.66 | 247.36 | 109.99 |
| 4256 | 242.12 | 516.65 | 520.14 | 249.14 | 110.63 |
| 4258 | 242.08 | 516.84 | 520.59 | 251.28 | 111.45 |
| 4260 | 242.01 | 516.99 | 521    | 253.06 | 112.1  |
| 4262 | 241.91 | 517.12 | 521.4  | 254.84 | 112.74 |
| 4264 | 241.83 | 517.32 | 521.89 | 256.93 | 113.43 |
| 4266 | 241.73 | 517.45 | 522.28 | 258.71 | 114.19 |
| 4268 | 241.67 | 517.61 | 522.69 | 260.52 | 114.87 |
| 4270 | 241.58 | 517.75 | 523.08 | 262.3  | 115.55 |
| 4272 | 241.51 | 517.94 | 523.56 | 264.42 | 116.24 |
| 4274 | 241.44 | 518.1  | 523.96 | 266.21 | 117.03 |
| 4276 | 241.35 | 518.24 | 524.35 | 267.99 | 117.69 |
| 4278 | 241.25 | 518.38 | 524.74 | 269.77 | 118.36 |
| 4280 | 241.16 | 518.57 | 525.13 | 271.56 | 119.04 |
| 4282 | 241.13 | 518.76 | 525.63 | 273.42 | 119.74 |
| 4284 | 241.01 | 518.87 | 525.98 | 275.48 | 120.48 |
| 4286 | 240.97 | 519.07 | 526.41 | 277.3  | 121.19 |
| 4288 | 240.91 | 519.26 | 526.87 | 279.11 | 121.88 |
| 4290 | 240.84 | 519.41 | 527.27 | 281.19 | 122.69 |
| 4292 | 240.74 | 519.54 | 527.63 | 282.95 | 123.36 |
| 4294 | 240.7  | 519.72 | 528.05 | 284.76 | 124.08 |
| 4296 | 240.62 | 519.88 | 528.44 | 286.53 | 124.79 |
| 4298 | 240.56 | 520.06 | 528.89 | 288.32 | 125.49 |
| 4300 | 240.49 | 520.22 | 529.26 | 290.37 | 126.28 |
| 4302 | 240.41 | 520.37 | 529.64 | 292.15 | 126.96 |
| 4304 | 240.31 | 520.55 | 530.01 | 293.91 | 127.63 |
| 4306 | 240.28 | 520.75 | 530.48 | 295.99 | 128.35 |
| 4308 | 240.22 | 520.92 | 530.88 | 297.75 | 129.17 |
| 4310 | 240.14 | 521.09 | 531.25 | 299.48 | 129.84 |
| 4312 | 240.05 | 521.26 | 531.66 | 301.21 | 130.47 |
| 4314 | 240.04 | 521.49 | 532.08 | 303.29 | 131.19 |
| 4316 | 239.99 | 521.68 | 532.47 | 305.06 | 131.98 |
| 4318 | 239.92 | 521.87 | 532.85 | 306.8  | 132.67 |
| 4320 | 239.82 | 522.02 | 533.2  | 308.5  | 133.3  |
| 4322 | 239.76 | 522.23 | 533.64 | 310.21 | 133.97 |
| 4324 | 239.74 | 522.46 | 534.07 | 312.26 | 134.78 |
| 4326 | 239.66 | 522.61 | 534.41 | 313.96 | 135.41 |
| 4328 | 239.55 | 522.78 | 534.81 | 315.64 | 136.04 |
| 4330 | 239.53 | 522.99 | 535.21 | 317.65 | 136.7  |
| 4332 | 239.5  | 523.2  | 535.61 | 319.38 | 137.49 |

|      |        |        |        |        |        |
|------|--------|--------|--------|--------|--------|
| 4334 | 239.44 | 523.36 | 535.99 | 321.08 | 138.12 |
| 4336 | 239.39 | 523.59 | 536.37 | 322.76 | 138.74 |
| 4338 | 239.34 | 523.76 | 536.82 | 324.46 | 139.37 |
| 4340 | 239.29 | 523.94 | 537.17 | 326.41 | 140.07 |
| 4342 | 239.23 | 524.12 | 537.53 | 328.08 | 140.68 |
| 4344 | 239.22 | 524.38 | 537.94 | 329.81 | 141.36 |
| 4346 | 239.21 | 524.58 | 538.41 | 331.51 | 142.02 |
| 4348 | 239.16 | 524.76 | 538.78 | 333.42 | 142.71 |
| 4350 | 239.09 | 524.9  | 539.12 | 335.06 | 143.32 |
| 4352 | 239.03 | 525.08 | 539.48 | 336.71 | 143.92 |
| 4354 | 238.99 | 525.28 | 539.92 | 338.63 | 144.53 |
| 4356 | 238.96 | 525.47 | 540.29 | 340.29 | 145.23 |
| 4358 | 238.92 | 525.65 | 540.67 | 341.95 | 145.84 |
| 4360 | 238.89 | 525.82 | 541.03 | 343.58 | 146.45 |
| 4362 | 238.88 | 526.05 | 541.49 | 345.23 | 147.06 |
| 4364 | 238.87 | 526.26 | 541.87 | 347.14 | 147.75 |
| 4366 | 238.8  | 526.4  | 542.21 | 348.73 | 148.32 |
| 4368 | 238.77 | 526.62 | 542.58 | 350.34 | 148.92 |
| 4370 | 238.76 | 526.81 | 543.03 | 352.26 | 149.53 |
| 4372 | 238.73 | 527    | 543.4  | 353.87 | 150.21 |
| 4374 | 238.71 | 527.19 | 543.77 | 355.47 | 150.78 |
| 4376 | 238.72 | 527.41 | 544.17 | 357.1  | 151.38 |
| 4378 | 238.7  | 527.63 | 544.62 | 358.7  | 151.95 |
| 4380 | 238.67 | 527.8  | 544.98 | 360.53 | 152.61 |
| 4382 | 238.64 | 528    | 545.34 | 362.1  | 153.19 |
| 4384 | 238.63 | 528.24 | 545.72 | 363.7  | 153.79 |
| 4386 | 238.62 | 528.44 | 546.14 | 365.27 | 154.36 |
| 4388 | 238.59 | 528.65 | 546.51 | 367.09 | 155.02 |
| 4390 | 238.58 | 528.86 | 546.88 | 368.65 | 155.57 |
| 4392 | 238.53 | 529.05 | 547.22 | 370.17 | 156.08 |
| 4394 | 238.53 | 529.32 | 547.62 | 371.73 | 156.64 |
| 4396 | 238.53 | 529.55 | 548.07 | 373.52 | 157.17 |
| 4398 | 238.51 | 529.76 | 548.43 | 375.05 | 157.78 |
| 4400 | 238.48 | 529.96 | 548.78 | 376.55 | 158.28 |
| 4402 | 238.46 | 530.22 | 549.2  | 378.04 | 158.78 |
| 4404 | 238.47 | 530.47 | 549.59 | 379.8  | 159.41 |
| 4406 | 238.43 | 530.67 | 549.95 | 381.28 | 159.92 |
| 4408 | 238.47 | 530.96 | 550.37 | 382.81 | 160.49 |
| 4410 | 238.43 | 531.16 | 550.72 | 384.27 | 160.97 |
| 4412 | 238.46 | 531.45 | 551.17 | 386.02 | 161.58 |
| 4414 | 238.47 | 531.69 | 551.55 | 387.48 | 162.05 |
| 4416 | 238.45 | 531.91 | 551.9  | 388.95 | 162.54 |
| 4418 | 238.45 | 532.14 | 552.28 | 390.4  | 163.04 |
| 4420 | 238.48 | 532.43 | 552.75 | 391.89 | 163.56 |

|      |        |        |        |        |        |
|------|--------|--------|--------|--------|--------|
| 4422 | 238.49 | 532.67 | 553.14 | 393.57 | 164.13 |
| 4424 | 238.44 | 532.88 | 553.47 | 394.96 | 164.58 |
| 4426 | 238.45 | 533.16 | 553.87 | 396.42 | 165.09 |
| 4428 | 238.45 | 533.41 | 554.29 | 398.06 | 165.57 |
| 4430 | 238.49 | 533.68 | 554.67 | 399.47 | 166.17 |
| 4432 | 238.52 | 533.95 | 555.08 | 400.92 | 166.7  |
| 4434 | 238.51 | 534.19 | 555.44 | 402.31 | 167.21 |
| 4436 | 238.54 | 534.49 | 555.9  | 403.73 | 167.73 |
| 4438 | 238.54 | 534.73 | 556.27 | 405.34 | 168.32 |
| 4440 | 238.55 | 534.99 | 556.64 | 406.71 | 168.84 |
| 4442 | 238.6  | 535.34 | 557.05 | 408.11 | 169.38 |
| 4444 | 238.6  | 535.59 | 557.49 | 409.46 | 169.88 |
| 4446 | 238.64 | 535.89 | 557.9  | 411.08 | 170.5  |
| 4448 | 238.66 | 536.15 | 558.27 | 412.43 | 170.98 |
| 4450 | 238.69 | 536.47 | 558.72 | 413.78 | 171.49 |
| 4452 | 238.71 | 536.75 | 559.04 | 415.14 | 172.02 |
| 4454 | 238.75 | 537.04 | 559.49 | 416.69 | 172.62 |
| 4456 | 238.77 | 537.32 | 559.87 | 418.02 | 173.14 |
| 4458 | 238.83 | 537.69 | 560.29 | 419.37 | 173.67 |
| 4460 | 238.85 | 537.96 | 560.73 | 420.68 | 174.17 |
| 4462 | 238.83 | 538.23 | 561.1  | 422.17 | 174.74 |
| 4464 | 238.89 | 538.56 | 561.5  | 423.49 | 175.23 |
| 4466 | 238.93 | 538.88 | 561.89 | 424.79 | 175.73 |
| 4468 | 238.98 | 539.25 | 562.34 | 426.31 | 176.22 |
| 4470 | 239.03 | 539.57 | 562.75 | 427.62 | 176.81 |
| 4472 | 239.05 | 539.87 | 563.13 | 428.89 | 177.3  |
| 4474 | 239.08 | 540.17 | 563.53 | 430.15 | 177.79 |
| 4476 | 239.12 | 540.53 | 563.99 | 431.62 | 178.28 |
| 4478 | 239.17 | 540.85 | 564.39 | 432.68 | 178.76 |
| 4480 | 239.19 | 541.14 | 564.76 | 434.12 | 179.3  |
| 4482 | 239.21 | 541.44 | 565.14 | 435.36 | 179.73 |
| 4484 | 239.27 | 541.82 | 565.61 | 436.62 | 180.18 |
| 4486 | 239.32 | 542.13 | 566.02 | 438.08 | 180.66 |
| 4488 | 239.39 | 542.48 | 566.44 | 439.33 | 181.23 |
| 4490 | 239.44 | 542.79 | 566.82 | 440.54 | 181.69 |
| 4492 | 239.47 | 543.07 | 567.18 | 441.76 | 182.13 |
| 4494 | 239.56 | 543.51 | 567.7  | 443.23 | 182.71 |
| 4496 | 239.6  | 543.82 | 568.08 | 444.42 | 183.14 |
| 4498 | 239.65 | 544.15 | 568.5  | 445.64 | 183.6  |
| 4500 | 239.74 | 544.56 | 568.91 | 446.86 | 184.07 |
| 4502 | 239.78 | 544.89 | 569.37 | 448.05 | 184.51 |
| 4504 | 239.82 | 545.22 | 569.77 | 449.43 | 185.04 |
| 4506 | 239.91 | 545.59 | 570.21 | 450.65 | 185.52 |
| 4508 | 239.95 | 545.92 | 570.61 | 451.81 | 185.98 |

|      |        |        |        |        |        |
|------|--------|--------|--------|--------|--------|
| 4510 | 240.04 | 546.35 | 571.12 | 453.2  | 186.45 |
| 4512 | 240.08 | 546.68 | 571.52 | 454.37 | 186.97 |
| 4514 | 240.14 | 547.03 | 571.91 | 455.51 | 187.38 |
| 4516 | 240.21 | 547.46 | 572.33 | 456.7  | 187.82 |
| 4518 | 240.28 | 547.85 | 572.82 | 458.06 | 188.26 |
| 4520 | 240.32 | 548.2  | 573.23 | 459.19 | 188.73 |
| 4522 | 240.37 | 548.57 | 573.65 | 460.32 | 189.13 |
| 4524 | 240.42 | 548.92 | 574.05 | 461.45 | 189.53 |
| 4526 | 240.49 | 549.37 | 574.47 | 462.59 | 189.95 |
| 4528 | 240.61 | 549.82 | 575.01 | 463.94 | 190.5  |
| 4530 | 240.64 | 550.17 | 575.4  | 465.03 | 190.87 |
| 4532 | 240.74 | 550.58 | 575.86 | 466.17 | 191.31 |
| 4534 | 240.81 | 551.05 | 576.3  | 467.3  | 191.74 |
| 4536 | 240.88 | 551.44 | 576.8  | 468.6  | 192.14 |
| 4538 | 240.94 | 551.83 | 577.23 | 469.71 | 192.59 |
| 4540 | 241.02 | 552.3  | 577.65 | 470.82 | 192.98 |
| 4542 | 241.08 | 552.69 | 578.15 | 472.08 | 193.36 |
| 4544 | 241.14 | 553.1  | 578.57 | 473.15 | 193.81 |
| 4546 | 241.17 | 553.47 | 578.99 | 474.2  | 194.17 |
| 4548 | 241.26 | 553.9  | 579.44 | 475.3  | 194.57 |
| 4550 | 241.32 | 554.35 | 579.84 | 476.34 | 194.92 |
| 4552 | 241.41 | 554.77 | 580.37 | 477.61 | 195.32 |
| 4554 | 241.47 | 555.16 | 580.8  | 478.66 | 195.73 |
| 4556 | 241.58 | 555.6  | 581.28 | 479.76 | 196.12 |
| 4558 | 241.64 | 556.07 | 581.77 | 480.8  | 196.49 |
| 4560 | 241.71 | 556.47 | 582.21 | 482.02 | 196.85 |
| 4562 | 241.77 | 556.86 | 582.65 | 483.06 | 197.27 |
| 4564 | 241.81 | 557.25 | 583.08 | 484.08 | 197.63 |
| 4566 | 241.87 | 557.71 | 583.56 | 485.24 | 197.95 |
| 4568 | 241.95 | 558.11 | 583.99 | 486.27 | 198.36 |
| 4570 | 242.05 | 558.54 | 584.47 | 487.33 | 198.76 |
| 4572 | 242.09 | 558.97 | 584.9  | 488.32 | 199.11 |
| 4574 | 242.13 | 559.3  | 585.32 | 489.32 | 199.45 |
| 4576 | 242.22 | 559.75 | 585.82 | 490.46 | 199.81 |
| 4578 | 242.29 | 560.16 | 586.28 | 491.49 | 200.22 |
| 4580 | 242.35 | 560.54 | 586.69 | 492.47 | 200.54 |
| 4582 | 242.43 | 560.95 | 587.15 | 493.46 | 200.88 |
| 4584 | 242.49 | 561.4  | 587.67 | 494.63 | 201.25 |
| 4586 | 242.54 | 561.76 | 588.09 | 495.6  | 201.55 |
| 4588 | 242.56 | 562.12 | 588.49 | 496.54 | 201.84 |
| 4590 | 242.67 | 562.6  | 588.95 | 497.55 | 202.18 |
| 4592 | 242.72 | 562.96 | 589.46 | 498.65 | 202.47 |
| 4594 | 242.76 | 563.34 | 589.91 | 499.63 | 202.86 |
| 4596 | 242.83 | 563.75 | 590.35 | 500.6  | 203.19 |

|      |        |        |        |        |        |
|------|--------|--------|--------|--------|--------|
| 4598 | 242.91 | 564.19 | 590.84 | 501.56 | 203.51 |
| 4600 | 242.93 | 564.54 | 591.26 | 502.67 | 203.82 |
| 4602 | 242.97 | 564.89 | 591.68 | 503.61 | 204.18 |
| 4604 | 243.02 | 565.26 | 592.12 | 504.55 | 204.46 |
| 4606 | 243.08 | 565.62 | 592.54 | 505.5  | 204.77 |
| 4608 | 243.14 | 566.07 | 593.05 | 506.44 | 205.09 |
| 4610 | 243.22 | 566.48 | 593.53 | 507.57 | 205.48 |
| 4612 | 243.26 | 566.82 | 593.94 | 508.51 | 205.77 |
| 4614 | 243.33 | 567.26 | 594.4  | 509.47 | 206.13 |
| 4616 | 243.36 | 567.61 | 594.88 | 510.53 | 206.43 |
| 4618 | 243.43 | 568    | 595.33 | 511.49 | 206.83 |
| 4620 | 243.49 | 568.38 | 595.77 | 512.42 | 207.17 |
| 4622 | 243.55 | 568.74 | 596.21 | 513.36 | 207.49 |
| 4624 | 243.63 | 569.17 | 596.66 | 514.31 | 207.84 |
| 4626 | 243.7  | 569.55 | 597.16 | 515.27 | 208.16 |
| 4628 | 243.75 | 569.89 | 597.59 | 516.35 | 208.55 |
| 4630 | 243.8  | 570.25 | 598.02 | 517.27 | 208.89 |
| 4632 | 243.85 | 570.67 | 598.44 | 518.19 | 209.24 |
| 4634 | 243.89 | 571.01 | 598.92 | 519.27 | 209.65 |
| 4636 | 243.93 | 571.35 | 599.33 | 520.17 | 210    |
| 4638 | 244    | 571.76 | 599.76 | 521.11 | 210.37 |
| 4640 | 244.04 | 572.1  | 600.24 | 522.2  | 210.77 |
| 4642 | 244.09 | 572.44 | 600.65 | 523.11 | 211.22 |
| 4644 | 244.14 | 572.78 | 601.07 | 524.02 | 211.61 |
| 4646 | 244.2  | 573.13 | 601.5  | 524.96 | 212.01 |
| 4648 | 244.26 | 573.53 | 601.98 | 525.88 | 212.41 |
| 4650 | 244.32 | 573.89 | 602.4  | 526.96 | 212.91 |
| 4652 | 244.36 | 574.2  | 602.78 | 527.89 | 213.31 |
| 4654 | 244.41 | 574.56 | 603.18 | 528.8  | 213.73 |
| 4656 | 244.45 | 574.88 | 603.65 | 529.86 | 214.16 |
| 4658 | 244.49 | 575.22 | 604.07 | 530.78 | 214.69 |
| 4660 | 244.55 | 575.54 | 604.47 | 531.7  | 215.13 |
| 4662 | 244.64 | 575.89 | 604.88 | 532.62 | 215.6  |
| 4664 | 244.69 | 576.29 | 605.38 | 533.73 | 216.06 |
| 4666 | 244.7  | 576.58 | 605.75 | 534.62 | 216.6  |
| 4668 | 244.76 | 576.91 | 606.16 | 535.55 | 217.09 |
| 4670 | 244.79 | 577.27 | 606.54 | 536.44 | 217.55 |
| 4672 | 244.83 | 577.59 | 606.95 | 537.35 | 218.05 |
| 4674 | 244.92 | 577.93 | 607.45 | 538.43 | 218.58 |
| 4676 | 244.95 | 578.22 | 607.83 | 539.34 | 219.15 |
| 4678 | 244.97 | 578.51 | 608.2  | 540.22 | 219.61 |
| 4680 | 245.03 | 578.87 | 608.66 | 541.15 | 220.11 |
| 4682 | 245.07 | 579.15 | 609.04 | 542.21 | 220.66 |
| 4684 | 245.1  | 579.43 | 609.43 | 543.1  | 221.14 |

|      |        |        |        |        |        |
|------|--------|--------|--------|--------|--------|
| 4686 | 245.16 | 579.72 | 609.83 | 544.01 | 221.63 |
| 4688 | 245.2  | 580.05 | 610.22 | 544.92 | 222.13 |
| 4690 | 245.25 | 580.34 | 610.67 | 545.83 | 222.62 |
| 4692 | 245.32 | 580.65 | 611.09 | 546.91 | 223.22 |
| 4694 | 245.35 | 580.92 | 611.47 | 547.82 | 223.68 |
| 4696 | 245.41 | 581.26 | 611.88 | 548.74 | 224.17 |
| 4698 | 245.43 | 581.52 | 612.31 | 549.8  | 224.63 |
| 4700 | 245.52 | 581.84 | 612.74 | 550.75 | 225.24 |
| 4702 | 245.53 | 582.1  | 613.1  | 551.61 | 225.68 |
| 4704 | 245.57 | 582.42 | 613.55 | 552.52 | 226.17 |
| 4706 | 245.6  | 582.69 | 613.93 | 553.6  | 226.74 |
| 4708 | 245.65 | 583    | 614.35 | 554.53 | 227.27 |
| 4710 | 245.7  | 583.28 | 614.73 | 555.44 | 227.79 |
| 4712 | 245.74 | 583.59 | 615.12 | 556.35 | 228.31 |
| 4714 | 245.76 | 583.85 | 615.57 | 557.39 | 228.8  |
| 4716 | 245.79 | 584.12 | 615.96 | 558.29 | 229.39 |
| 4718 | 245.86 | 584.42 | 616.39 | 559.21 | 229.92 |
| 4720 | 245.92 | 584.7  | 616.78 | 560.12 | 230.43 |
| 4722 | 245.96 | 585.03 | 617.26 | 561.2  | 230.97 |
| 4724 | 246.01 | 585.32 | 617.67 | 562.13 | 231.61 |
| 4726 | 246.06 | 585.59 | 618.07 | 563.03 | 232.13 |
| 4728 | 246.14 | 585.88 | 618.49 | 563.97 | 232.63 |
| 4730 | 246.14 | 586.16 | 618.93 | 564.85 | 233.1  |
| 4732 | 246.16 | 586.4  | 619.32 | 565.92 | 233.6  |
| 4734 | 246.22 | 586.68 | 619.74 | 566.83 | 234.21 |
| 4736 | 246.29 | 586.97 | 620.17 | 567.76 | 234.73 |
| 4738 | 246.32 | 587.28 | 620.63 | 568.68 | 235.26 |
| 4740 | 246.36 | 587.56 | 621.04 | 569.75 | 235.9  |
| 4742 | 246.4  | 587.83 | 621.46 | 570.66 | 236.46 |
| 4744 | 246.4  | 588.07 | 621.84 | 571.53 | 237.02 |
| 4746 | 246.43 | 588.37 | 622.23 | 572.4  | 237.6  |
| 4748 | 246.47 | 588.63 | 622.72 | 573.44 | 238.33 |
| 4750 | 246.53 | 588.91 | 623.16 | 574.36 | 238.99 |
| 4752 | 246.57 | 589.18 | 623.59 | 575.25 | 239.67 |
| 4754 | 246.63 | 589.51 | 624.09 | 576.13 | 240.38 |
| 4756 | 246.69 | 589.79 | 624.53 | 577.17 | 241.24 |
| 4758 | 246.71 | 590.04 | 624.93 | 578.01 | 241.97 |
| 4760 | 246.75 | 590.31 | 625.35 | 578.86 | 242.74 |
| 4762 | 246.8  | 590.57 | 625.79 | 579.7  | 243.53 |
| 4764 | 246.87 | 590.9  | 626.3  | 580.55 | 244.37 |
| 4766 | 246.9  | 591.17 | 626.72 | 581.52 | 245.33 |
| 4768 | 246.95 | 591.46 | 627.17 | 582.35 | 246.2  |
| 4770 | 247.01 | 591.81 | 627.63 | 583.16 | 247.08 |
| 4772 | 247.04 | 592.07 | 628.14 | 584.08 | 247.95 |

|      |        |        |        |        |        |
|------|--------|--------|--------|--------|--------|
| 4774 | 247.09 | 592.35 | 628.58 | 584.88 | 248.97 |
| 4776 | 247.14 | 592.64 | 629.03 | 585.65 | 249.84 |
| 4778 | 247.2  | 592.96 | 629.5  | 586.43 | 250.72 |
| 4780 | 247.24 | 593.28 | 629.94 | 587.16 | 251.55 |
| 4782 | 247.3  | 593.6  | 630.48 | 588.05 | 252.52 |
| 4784 | 247.36 | 593.91 | 630.96 | 588.8  | 253.37 |
| 4786 | 247.42 | 594.23 | 631.45 | 589.54 | 254.23 |
| 4788 | 247.49 | 594.6  | 631.92 | 590.26 | 255.07 |
| 4790 | 247.53 | 594.9  | 632.45 | 591.06 | 255.88 |
| 4792 | 247.56 | 595.19 | 632.9  | 591.75 | 256.83 |
| 4794 | 247.62 | 595.5  | 633.37 | 592.42 | 257.67 |
| 4796 | 247.68 | 595.87 | 633.93 | 593.08 | 258.51 |
| 4798 | 247.73 | 596.18 | 634.4  | 593.86 | 259.46 |
| 4800 | 247.8  | 596.48 | 634.9  | 594.51 | 260.25 |
| 4802 | 247.85 | 596.78 | 635.34 | 595.13 | 261.01 |
| 4804 | 247.94 | 597.11 | 635.83 | 595.81 | 261.82 |
| 4806 | 248    | 597.45 | 636.27 | 596.39 | 262.55 |
| 4808 | 248.08 | 597.77 | 636.83 | 597.14 | 263.43 |
| 4810 | 248.14 | 598.06 | 637.27 | 597.75 | 264.13 |
| 4812 | 248.2  | 598.38 | 637.7  | 598.32 | 264.82 |
| 4814 | 248.24 | 598.65 | 638.18 | 598.89 | 265.5  |
| 4816 | 248.32 | 598.94 | 638.62 | 599.57 | 266.3  |
| 4818 | 248.37 | 599.21 | 639.02 | 600.11 | 266.96 |
| 4820 | 248.47 | 599.53 | 639.5  | 600.66 | 267.67 |
| 4822 | 248.56 | 599.9  | 640.03 | 601.23 | 268.37 |
| 4824 | 248.62 | 600.18 | 640.48 | 601.86 | 269.14 |
| 4826 | 248.68 | 600.46 | 640.92 | 602.39 | 269.73 |
| 4828 | 248.73 | 600.75 | 641.33 | 602.89 | 270.29 |
| 4830 | 248.81 | 601.03 | 641.84 | 603.51 | 270.85 |
| 4832 | 248.9  | 601.34 | 642.32 | 604.05 | 271.53 |
| 4834 | 248.96 | 601.6  | 642.77 | 604.55 | 272.08 |
| 4836 | 249.01 | 601.86 | 643.21 | 605.03 | 272.62 |
| 4838 | 249.07 | 602.16 | 643.64 | 605.52 | 273.13 |
| 4840 | 249.17 | 602.44 | 644.19 | 606.12 | 273.75 |
| 4842 | 249.22 | 602.68 | 644.61 | 606.57 | 274.21 |
| 4844 | 249.29 | 602.92 | 645.05 | 607.03 | 274.66 |
| 4846 | 249.34 | 603.19 | 645.48 | 607.48 | 275.08 |
| 4848 | 249.43 | 603.46 | 646.02 | 608.04 | 275.55 |
| 4850 | 249.49 | 603.71 | 646.47 | 608.48 | 276.06 |
| 4852 | 249.59 | 603.96 | 646.93 | 608.92 | 276.51 |
| 4854 | 249.65 | 604.25 | 647.45 | 609.36 | 276.96 |
| 4856 | 249.76 | 604.54 | 647.93 | 609.88 | 277.54 |
| 4858 | 249.85 | 604.81 | 648.39 | 610.31 | 278.02 |
| 4860 | 249.9  | 605.05 | 648.81 | 610.69 | 278.45 |

|      |        |        |        |        |        |
|------|--------|--------|--------|--------|--------|
| 4862 | 249.97 | 605.33 | 649.24 | 611.08 | 278.87 |
| 4864 | 250.03 | 605.58 | 649.75 | 611.48 | 279.31 |
| 4866 | 250.1  | 605.84 | 650.2  | 611.96 | 279.81 |
| 4868 | 250.19 | 606.09 | 650.63 | 612.35 | 280.21 |
| 4870 | 250.25 | 606.37 | 651.07 | 612.75 | 280.61 |
| 4872 | 250.33 | 606.63 | 651.61 | 613.16 | 281.03 |
| 4874 | 250.42 | 606.88 | 652.04 | 613.65 | 281.47 |
| 4876 | 250.53 | 607.15 | 652.49 | 614.09 | 281.87 |
| 4878 | 250.62 | 607.41 | 652.91 | 614.52 | 282.26 |
| 4880 | 250.68 | 607.66 | 653.38 | 614.92 | 282.62 |
| 4882 | 250.77 | 607.9  | 653.81 | 615.42 | 283.02 |
| 4884 | 250.84 | 608.12 | 654.22 | 615.86 | 283.48 |
| 4886 | 250.92 | 608.33 | 654.62 | 616.28 | 283.84 |
| 4888 | 251    | 608.59 | 655.1  | 616.73 | 284.21 |
| 4890 | 251.06 | 608.79 | 655.49 | 617.25 | 284.64 |
| 4892 | 251.14 | 609.02 | 655.89 | 617.7  | 285.04 |
| 4894 | 251.19 | 609.21 | 656.25 | 618.13 | 285.39 |
| 4896 | 251.27 | 609.46 | 656.63 | 618.59 | 285.73 |
| 4898 | 251.34 | 609.68 | 657.07 | 619.16 | 286.15 |
| 4900 | 251.43 | 609.9  | 657.43 | 619.64 | 286.51 |
| 4902 | 251.49 | 610.08 | 657.77 | 620.12 | 286.86 |
| 4904 | 251.57 | 610.31 | 658.1  | 620.62 | 287.2  |
| 4906 | 251.66 | 610.5  | 658.52 | 621.22 | 287.58 |
| 4908 | 251.72 | 610.67 | 658.85 | 621.71 | 287.95 |
| 4910 | 251.83 | 610.88 | 659.2  | 622.24 | 288.3  |
| 4912 | 251.95 | 611.11 | 659.6  | 622.8  | 288.63 |
| 4914 | 252.02 | 611.28 | 659.91 | 623.42 | 289.01 |
| 4916 | 252.1  | 611.44 | 660.2  | 623.95 | 289.35 |
| 4918 | 252.17 | 611.6  | 660.51 | 624.47 | 289.71 |
| 4920 | 252.25 | 611.75 | 660.79 | 624.98 | 290.07 |
| 4922 | 252.34 | 611.94 | 661.13 | 625.51 | 290.4  |
| 4924 | 252.45 | 612.12 | 661.43 | 626.16 | 290.84 |
| 4926 | 252.51 | 612.26 | 661.67 | 626.65 | 291.18 |
| 4928 | 252.61 | 612.44 | 661.95 | 627.17 | 291.56 |
| 4930 | 252.72 | 612.62 | 662.27 | 627.72 | 291.95 |
| 4932 | 252.8  | 612.77 | 662.52 | 628.33 | 292.41 |
| 4934 | 252.88 | 612.91 | 662.77 | 628.84 | 292.81 |
| 4936 | 252.96 | 613.04 | 663    | 629.34 | 293.21 |
| 4938 | 253.03 | 613.17 | 663.25 | 629.81 | 293.62 |
| 4940 | 253.11 | 613.3  | 663.47 | 630.37 | 294.04 |
| 4942 | 253.2  | 613.44 | 663.72 | 630.87 | 294.38 |
| 4944 | 253.3  | 613.6  | 663.94 | 631.36 | 294.73 |
| 4946 | 253.37 | 613.7  | 664.18 | 631.93 | 295.07 |
| 4948 | 253.49 | 613.83 | 664.41 | 632.44 | 295.5  |



|      |        |        |        |        |        |
|------|--------|--------|--------|--------|--------|
| 4950 | 253.62 | 613.98 | 664.64 | 632.96 | 295.91 |
| 4952 | 253.71 | 614.11 | 664.85 | 633.44 | 296.32 |
| 4954 | 253.81 | 614.23 | 665.03 | 633.92 | 296.73 |
| 4956 | 253.91 | 614.34 | 665.26 | 634.47 | 297.19 |
| 4958 | 253.99 | 614.46 | 665.44 | 634.95 | 297.55 |
| 4960 | 254.04 | 614.53 | 665.59 | 635.39 | 297.91 |
| 4962 | 254.18 | 614.66 | 665.79 | 635.87 | 298.31 |
| 4964 | 254.26 | 614.78 | 665.98 | 636.34 | 298.64 |
| 4966 | 254.36 | 614.9  | 666.15 | 636.9  | 299.05 |
| 4968 | 254.43 | 615    | 666.31 | 637.39 | 299.38 |
| 4970 | 254.54 | 615.12 | 666.46 | 637.86 | 299.72 |
| 4972 | 254.65 | 615.25 | 666.66 | 638.45 | 300.07 |
| 4974 | 254.73 | 615.38 | 666.81 | 638.92 | 300.44 |
| 4976 | 254.8  | 615.48 | 666.94 | 639.37 | 300.7  |
| 4978 | 254.92 | 615.62 | 667.1  | 639.88 | 301.02 |
| 4980 | 255.03 | 615.77 | 667.27 | 640.4  | 301.33 |
| 4982 | 255.09 | 615.88 | 667.4  | 640.97 | 301.65 |
| 4984 | 255.2  | 616.03 | 667.55 | 641.45 | 302.06 |
| 4986 | 255.31 | 616.19 | 667.67 | 641.92 | 302.43 |
| 4988 | 255.4  | 616.32 | 667.82 | 642.39 | 302.78 |
| 4990 | 255.49 | 616.45 | 667.94 | 642.96 | 303.16 |
| 4992 | 255.58 | 616.58 | 668.04 | 643.44 | 303.49 |
| 4994 | 255.64 | 616.67 | 668.13 | 643.89 | 303.82 |
| 4996 | 255.78 | 616.87 | 668.29 | 644.39 | 304.25 |
| 4998 | 255.87 | 617    | 668.38 | 644.92 | 304.67 |
| 5000 | 255.96 | 617.13 | 668.48 | 645.38 | 305    |
| 5002 | 256.05 | 617.26 | 668.59 | 645.85 | 305.36 |
| 5004 | 256.17 | 617.41 | 668.69 | 646.33 | 305.69 |
| 5006 | 256.26 | 617.54 | 668.78 | 646.85 | 305.99 |
| 5008 | 256.35 | 617.66 | 668.87 | 647.31 | 306.32 |
| 5010 | 256.47 | 617.77 | 668.95 | 647.78 | 306.6  |
| 5012 | 256.59 | 617.93 | 669.06 | 648.25 | 306.92 |
| 5014 | 256.66 | 618.02 | 669.12 | 648.76 | 307.23 |
| 5016 | 256.75 | 618.12 | 669.19 | 649.21 | 307.62 |
| 5018 | 256.85 | 618.23 | 669.26 | 649.65 | 307.96 |
| 5020 | 256.95 | 618.34 | 669.33 | 650.1  | 308.28 |
| 5022 | 257.04 | 618.42 | 669.39 | 650.52 | 308.56 |
| 5024 | 257.09 | 618.48 | 669.43 | 650.98 | 308.78 |
| 5026 | 257.21 | 618.59 | 669.53 | 651.44 | 309.08 |
| 5028 | 257.32 | 618.69 | 669.59 | 651.87 | 309.29 |
| 5030 | 257.41 | 618.77 | 669.66 | 652.28 | 309.56 |
| 5032 | 257.54 | 618.85 | 669.75 | 652.78 | 309.84 |
| 5034 | 257.59 | 618.88 | 669.78 | 653.15 | 310.12 |
| 5036 | 257.75 | 618.99 | 669.9  | 653.62 | 310.45 |

|      |        |        |        |        |        |
|------|--------|--------|--------|--------|--------|
| 5038 | 257.85 | 619.05 | 669.99 | 654.03 | 310.73 |
| 5040 | 257.94 | 619.1  | 670.07 | 654.5  | 311.03 |
| 5042 | 258.04 | 619.14 | 670.16 | 654.91 | 311.38 |
| 5044 | 258.14 | 619.18 | 670.25 | 655.3  | 311.64 |
| 5046 | 258.25 | 619.22 | 670.35 | 655.71 | 311.87 |
| 5048 | 258.32 | 619.23 | 670.44 | 656.09 | 312.07 |
| 5050 | 258.43 | 619.27 | 670.56 | 656.57 | 312.33 |
| 5052 | 258.54 | 619.29 | 670.67 | 656.98 | 312.56 |
| 5054 | 258.65 | 619.3  | 670.78 | 657.36 | 312.79 |
| 5056 | 258.75 | 619.32 | 670.92 | 657.76 | 313.07 |
| 5058 | 258.83 | 619.3  | 671.03 | 658.19 | 313.36 |
| 5060 | 258.92 | 619.28 | 671.15 | 658.57 | 313.59 |
| 5062 | 259.02 | 619.26 | 671.26 | 658.96 | 313.81 |
| 5064 | 259.11 | 619.24 | 671.39 | 659.33 | 314.03 |
| 5066 | 259.19 | 619.21 | 671.55 | 659.77 | 314.29 |
| 5068 | 259.29 | 619.19 | 671.68 | 660.15 | 314.48 |
| 5070 | 259.38 | 619.15 | 671.82 | 660.51 | 314.7  |
| 5072 | 259.45 | 619.12 | 671.96 | 660.86 | 314.88 |
| 5074 | 259.54 | 619.08 | 672.14 | 661.29 | 315.05 |
| 5076 | 259.63 | 619.05 | 672.3  | 661.66 | 315.23 |
| 5078 | 259.69 | 619.01 | 672.45 | 661.99 | 315.38 |
| 5080 | 259.79 | 618.96 | 672.65 | 662.35 | 315.56 |
| 5082 | 259.85 | 618.9  | 672.78 | 662.67 | 315.75 |
| 5084 | 259.92 | 618.85 | 672.98 | 663.07 | 315.95 |
| 5086 | 260.02 | 618.81 | 673.18 | 663.41 | 316.14 |
| 5088 | 260.08 | 618.73 | 673.37 | 663.74 | 316.34 |
| 5090 | 260.16 | 618.71 | 673.6  | 664.06 | 316.55 |
| 5092 | 260.22 | 618.64 | 673.78 | 664.41 | 316.75 |
| 5094 | 260.29 | 618.59 | 673.99 | 664.72 | 316.95 |
| 5096 | 260.37 | 618.54 | 674.21 | 665.02 | 317.16 |
| 5098 | 260.45 | 618.48 | 674.48 | 665.33 | 317.34 |
| 5100 | 260.52 | 618.45 | 674.73 | 665.71 | 317.54 |
| 5102 | 260.58 | 618.37 | 674.95 | 665.99 | 317.64 |
| 5104 | 260.61 | 618.27 | 675.15 | 666.27 | 317.72 |
| 5106 | 260.66 | 618.19 | 675.43 | 666.63 | 317.82 |
| 5108 | 260.7  | 618.09 | 675.66 | 666.92 | 317.96 |
| 5110 | 260.72 | 617.99 | 675.89 | 667.22 | 318.05 |
| 5112 | 260.77 | 617.89 | 676.15 | 667.52 | 318.13 |
| 5114 | 260.8  | 617.77 | 676.39 | 667.84 | 318.21 |
| 5116 | 260.81 | 617.65 | 676.68 | 668.21 | 318.29 |
| 5118 | 260.82 | 617.51 | 676.93 | 668.51 | 318.39 |
| 5120 | 260.8  | 617.37 | 677.18 | 668.82 | 318.45 |
| 5122 | 260.81 | 617.23 | 677.46 | 669.14 | 318.53 |
| 5124 | 260.78 | 617.02 | 677.75 | 669.48 | 318.59 |

|      |        |        |        |        |        |
|------|--------|--------|--------|--------|--------|
| 5126 | 260.73 | 616.84 | 678.01 | 669.79 | 318.72 |
| 5128 | 260.66 | 616.64 | 678.26 | 670.09 | 318.78 |
| 5130 | 260.57 | 616.41 | 678.56 | 670.43 | 318.87 |
| 5132 | 260.45 | 616.19 | 678.89 | 670.76 | 318.95 |
| 5134 | 260.25 | 615.92 | 679.16 | 671.12 | 319    |
| 5136 | 260.06 | 615.66 | 679.44 | 671.46 | 319.06 |
| 5138 | 259.8  | 615.32 | 679.73 | 671.79 | 319.14 |
| 5140 | 259.52 | 614.97 | 680.05 | 672.15 | 319.18 |
| 5142 | 259.21 | 614.6  | 680.31 | 672.44 | 319.21 |
| 5144 | 258.9  | 614.21 | 680.59 | 672.78 | 319.27 |
| 5146 | 258.58 | 613.84 | 680.91 | 673.15 | 319.38 |
| 5148 | 258.22 | 613.29 | 681.24 | 673.46 | 319.43 |
| 5150 | 257.88 | 612.78 | 681.51 | 673.84 | 319.46 |
| 5152 | 257.54 | 612.27 | 681.83 | 674.19 | 319.5  |
| 5154 | 257.14 | 611.62 | 682.13 | 674.53 | 319.56 |
| 5156 | 256.8  | 611.02 | 682.48 | 674.91 | 319.63 |
| 5158 | 256.41 | 610.37 | 682.75 | 675.2  | 319.66 |
| 5160 | 256.07 | 609.74 | 683.07 | 675.55 | 319.72 |
| 5162 | 255.7  | 609.03 | 683.37 | 675.88 | 319.76 |
| 5164 | 255.27 | 608.19 | 683.72 | 676.26 | 319.79 |
| 5166 | 254.92 | 607.45 | 684.02 | 676.58 | 319.83 |
| 5168 | 254.53 | 606.66 | 684.3  | 676.88 | 319.84 |
| 5170 | 254.08 | 605.86 | 684.6  | 677.17 | 319.86 |
| 5172 | 253.71 | 604.94 | 684.97 | 677.48 | 319.87 |
| 5174 | 253.32 | 604.13 | 685.27 | 677.84 | 319.87 |
| 5176 | 252.96 | 603.32 | 685.59 | 678.17 | 319.88 |
| 5178 | 252.5  | 602.48 | 685.87 | 678.45 | 319.89 |
| 5180 | 252.13 | 601.51 | 686.22 | 678.77 | 319.93 |
| 5182 | 251.78 | 600.71 | 686.54 | 679.11 | 320.01 |
| 5184 | 251.39 | 599.87 | 686.84 | 679.45 | 320.06 |
| 5186 | 250.95 | 599.05 | 687.15 | 679.77 | 320.11 |
| 5188 | 250.58 | 598.1  | 687.45 | 680.09 | 320.18 |
| 5190 | 250.21 | 597.29 | 687.81 | 680.39 | 320.25 |
| 5192 | 249.82 | 596.47 | 688.1  | 680.73 | 320.3  |
| 5194 | 249.46 | 595.66 | 688.42 | 681.06 | 320.35 |
| 5196 | 249.04 | 594.74 | 688.76 | 681.4  | 320.41 |
| 5198 | 248.69 | 593.98 | 689.15 | 681.79 | 320.5  |
| 5200 | 248.3  | 593.16 | 689.44 | 682.09 | 320.53 |
| 5202 | 247.95 | 592.38 | 689.77 | 682.43 | 320.58 |
| 5204 | 247.54 | 591.6  | 690.09 | 682.75 | 320.63 |
| 5206 | 247.2  | 590.72 | 690.5  | 683.11 | 320.69 |
| 5208 | 246.85 | 589.95 | 690.82 | 683.49 | 320.72 |
| 5210 | 246.52 | 589.21 | 691.16 | 683.83 | 320.81 |
| 5212 | 246.09 | 588.3  | 691.47 | 684.14 | 320.87 |

|      |        |        |        |        |        |
|------|--------|--------|--------|--------|--------|
| 5214 | 245.73 | 587.53 | 691.85 | 684.52 | 320.96 |
| 5216 | 245.4  | 586.79 | 692.19 | 684.86 | 321.08 |
| 5218 | 245.06 | 586.02 | 692.51 | 685.18 | 321.16 |
| 5220 | 244.71 | 585.26 | 692.84 | 685.49 | 321.23 |
| 5222 | 244.3  | 584.37 | 693.2  | 685.81 | 321.27 |
| 5224 | 243.98 | 583.62 | 693.53 | 686.19 | 321.39 |
| 5226 | 243.66 | 582.88 | 693.85 | 686.51 | 321.49 |
| 5228 | 243.32 | 582.12 | 694.16 | 686.84 | 321.6  |
| 5230 | 242.97 | 581.29 | 694.5  | 687.17 | 321.73 |
| 5232 | 242.66 | 580.55 | 694.87 | 687.51 | 321.85 |
| 5234 | 242.31 | 579.79 | 695.17 | 687.85 | 321.94 |
| 5236 | 241.93 | 579.04 | 695.46 | 688.14 | 322.06 |
| 5238 | 241.62 | 578.18 | 695.77 | 688.45 | 322.18 |
| 5240 | 241.28 | 577.44 | 696.12 | 688.78 | 322.27 |
| 5242 | 240.97 | 576.73 | 696.42 | 689.09 | 322.4  |
| 5244 | 240.68 | 576.03 | 696.75 | 689.39 | 322.51 |
| 5246 | 240.33 | 575.31 | 697.06 | 689.68 | 322.63 |
| 5248 | 240.03 | 574.49 | 697.41 | 690.02 | 322.75 |
| 5250 | 239.72 | 573.77 | 697.7  | 690.31 | 322.92 |
| 5252 | 239.41 | 573.06 | 698    | 690.6  | 323.07 |
| 5254 | 239.08 | 572.38 | 698.33 | 690.88 | 323.28 |
| 5256 | 238.79 | 571.59 | 698.68 | 691.15 | 323.48 |
| 5258 | 238.51 | 570.91 | 698.97 | 691.46 | 323.7  |
| 5260 | 238.23 | 570.22 | 699.26 | 691.73 | 323.85 |
| 5262 | 237.9  | 569.43 | 699.55 | 691.98 | 323.98 |
| 5264 | 237.62 | 568.77 | 699.9  | 692.26 | 324.1  |
| 5266 | 237.34 | 568.1  | 700.19 | 692.51 | 324.28 |
| 5268 | 237.06 | 567.44 | 700.47 | 692.74 | 324.43 |
| 5270 | 236.82 | 566.82 | 700.78 | 693    | 324.6  |
| 5272 | 236.51 | 566.06 | 701.04 | 693.2  | 324.75 |
| 5274 | 236.25 | 565.44 | 701.37 | 693.44 | 324.92 |
| 5276 | 235.98 | 564.8  | 701.63 | 693.65 | 325.07 |
| 5278 | 235.65 | 564.16 | 701.88 | 693.84 | 325.22 |
| 5280 | 235.4  | 563.46 | 702.17 | 694.05 | 325.38 |
| 5282 | 235.16 | 562.85 | 702.49 | 694.26 | 325.51 |
| 5284 | 234.89 | 562.24 | 702.73 | 694.43 | 325.65 |
| 5286 | 234.67 | 561.67 | 703.01 | 694.63 | 325.8  |
| 5288 | 234.36 | 560.98 | 703.3  | 694.77 | 325.93 |
| 5290 | 234.14 | 560.43 | 703.57 | 694.96 | 326.05 |
| 5292 | 233.91 | 559.86 | 703.83 | 695.14 | 326.14 |
| 5294 | 233.65 | 559.3  | 704.09 | 695.28 | 326.2  |
| 5296 | 233.41 | 558.69 | 704.35 | 695.42 | 326.25 |
| 5298 | 233.16 | 558.14 | 704.65 | 695.55 | 326.27 |
| 5300 | 232.95 | 557.63 | 704.93 | 695.72 | 326.35 |

|      |        |        |        |        |        |
|------|--------|--------|--------|--------|--------|
| 5302 | 232.71 | 557.08 | 705.15 | 695.81 | 326.35 |
| 5304 | 232.43 | 556.55 | 705.37 | 695.88 | 326.36 |
| 5306 | 232.23 | 555.98 | 705.66 | 696    | 326.42 |
| 5308 | 232.02 | 555.48 | 705.89 | 696.09 | 326.44 |
| 5310 | 231.79 | 554.95 | 706.1  | 696.15 | 326.42 |
| 5312 | 231.54 | 554.47 | 706.31 | 696.22 | 326.41 |
| 5314 | 231.35 | 553.95 | 706.6  | 696.31 | 326.43 |
| 5316 | 231.11 | 553.46 | 706.79 | 696.34 | 326.38 |
| 5318 | 230.94 | 553.02 | 707.04 | 696.41 | 326.33 |
| 5320 | 230.7  | 552.57 | 707.25 | 696.43 | 326.27 |
| 5322 | 230.48 | 552.01 | 707.47 | 696.42 | 326.19 |
| 5324 | 230.28 | 551.58 | 707.68 | 696.44 | 326.14 |
| 5326 | 230.08 | 551.14 | 707.87 | 696.43 | 326.05 |
| 5328 | 229.89 | 550.73 | 708.08 | 696.44 | 326    |
| 5330 | 229.69 | 550.25 | 708.27 | 696.42 | 325.93 |
| 5332 | 229.53 | 549.86 | 708.52 | 696.4  | 325.92 |
| 5334 | 229.31 | 549.41 | 708.67 | 696.32 | 325.85 |
| 5336 | 229.11 | 548.97 | 708.83 | 696.25 | 325.8  |
| 5338 | 228.9  | 548.58 | 709    | 696.18 | 325.75 |
| 5340 | 228.76 | 548.15 | 709.21 | 696.14 | 325.69 |
| 5342 | 228.59 | 547.78 | 709.4  | 696.05 | 325.61 |
| 5344 | 228.41 | 547.39 | 709.55 | 695.94 | 325.51 |
| 5346 | 228.23 | 546.97 | 709.71 | 695.84 | 325.43 |
| 5348 | 228.09 | 546.61 | 709.91 | 695.73 | 325.37 |
| 5350 | 227.89 | 546.23 | 710.02 | 695.57 | 325.2  |
| 5352 | 227.74 | 545.89 | 710.18 | 695.42 | 325.12 |
| 5354 | 227.54 | 545.51 | 710.29 | 695.25 | 324.97 |
| 5356 | 227.41 | 545.16 | 710.46 | 695.14 | 324.89 |
| 5358 | 227.26 | 544.83 | 710.63 | 694.95 | 324.73 |
| 5360 | 227.08 | 544.48 | 710.73 | 694.74 | 324.55 |
| 5362 | 226.91 | 544.16 | 710.86 | 694.55 | 324.4  |
| 5364 | 226.73 | 543.75 | 710.95 | 694.32 | 324.24 |
| 5366 | 226.62 | 543.45 | 711.07 | 694.09 | 324.12 |
| 5368 | 226.47 | 543.15 | 711.19 | 693.89 | 324    |
| 5370 | 226.32 | 542.86 | 711.3  | 693.66 | 323.88 |
| 5372 | 226.19 | 542.54 | 711.41 | 693.44 | 323.77 |
| 5374 | 226.06 | 542.24 | 711.51 | 693.17 | 323.62 |
| 5376 | 225.93 | 541.97 | 711.61 | 692.89 | 323.47 |
| 5378 | 225.76 | 541.69 | 711.69 | 692.63 | 323.34 |
| 5380 | 225.63 | 541.37 | 711.78 | 692.33 | 323.18 |
| 5382 | 225.49 | 541.08 | 711.84 | 691.98 | 323    |
| 5384 | 225.35 | 540.82 | 711.92 | 691.69 | 322.8  |
| 5386 | 225.24 | 540.59 | 712.01 | 691.42 | 322.67 |
| 5388 | 225.1  | 540.36 | 712.1  | 691.12 | 322.48 |

|      |        |        |        |        |        |
|------|--------|--------|--------|--------|--------|
| 5390 | 224.99 | 540.09 | 712.21 | 690.78 | 322.28 |
| 5392 | 224.86 | 539.84 | 712.26 | 690.46 | 322.03 |
| 5394 | 224.71 | 539.59 | 712.3  | 690.11 | 321.79 |
| 5396 | 224.56 | 539.33 | 712.38 | 689.8  | 321.62 |
| 5398 | 224.45 | 539.13 | 712.47 | 689.47 | 321.42 |
| 5400 | 224.36 | 538.94 | 712.55 | 689.1  | 321.26 |
| 5402 | 224.23 | 538.72 | 712.6  | 688.74 | 321.04 |
| 5404 | 224.1  | 538.48 | 712.66 | 688.38 | 320.88 |
| 5406 | 223.98 | 538.28 | 712.72 | 687.94 | 320.67 |
| 5408 | 223.81 | 538.04 | 712.72 | 687.53 | 320.41 |
| 5410 | 223.7  | 537.87 | 712.77 | 687.16 | 320.22 |
| 5412 | 223.62 | 537.72 | 712.84 | 686.8  | 320.03 |
| 5414 | 223.49 | 537.52 | 712.88 | 686.43 | 319.83 |
| 5416 | 223.38 | 537.37 | 712.94 | 685.96 | 319.6  |
| 5418 | 223.26 | 537.2  | 712.97 | 685.56 | 319.4  |
| 5420 | 223.11 | 537.04 | 713    | 685.13 | 319.2  |
| 5422 | 223.01 | 536.88 | 713.04 | 684.72 | 319.03 |
| 5424 | 222.9  | 536.74 | 713.09 | 684.22 | 318.85 |
| 5426 | 222.79 | 536.6  | 713.11 | 683.8  | 318.63 |
| 5428 | 222.67 | 536.45 | 713.14 | 683.35 | 318.42 |
| 5430 | 222.53 | 536.33 | 713.17 | 682.91 | 318.21 |
| 5432 | 222.43 | 536.2  | 713.22 | 682.46 | 318.01 |
| 5434 | 222.32 | 536.1  | 713.27 | 681.95 | 317.76 |
| 5436 | 222.22 | 535.99 | 713.31 | 681.51 | 317.54 |
| 5438 | 222.1  | 535.87 | 713.34 | 681.05 | 317.32 |
| 5440 | 221.97 | 535.76 | 713.38 | 680.52 | 317.09 |
| 5442 | 221.87 | 535.68 | 713.43 | 680.06 | 316.85 |
| 5444 | 221.75 | 535.59 | 713.46 | 679.59 | 316.59 |
| 5446 | 221.62 | 535.5  | 713.5  | 679.12 | 316.31 |
| 5448 | 221.52 | 535.41 | 713.53 | 678.65 | 316.05 |
| 5450 | 221.43 | 535.36 | 713.59 | 678.12 | 315.82 |
| 5452 | 221.32 | 535.28 | 713.62 | 677.64 | 315.57 |
| 5454 | 221.19 | 535.23 | 713.66 | 677.15 | 315.34 |
| 5456 | 221.08 | 535.15 | 713.71 | 676.66 | 315.12 |
| 5458 | 220.99 | 535.12 | 713.77 | 676.12 | 314.93 |
| 5460 | 220.87 | 535.05 | 713.79 | 675.61 | 314.66 |
| 5462 | 220.74 | 535    | 713.83 | 675.11 | 314.41 |
| 5464 | 220.63 | 534.96 | 713.88 | 674.61 | 314.15 |
| 5466 | 220.53 | 534.91 | 713.93 | 674.02 | 313.86 |
| 5468 | 220.42 | 534.86 | 713.96 | 673.5  | 313.57 |
| 5470 | 220.32 | 534.84 | 714.02 | 673    | 313.29 |
| 5472 | 220.16 | 534.77 | 714.04 | 672.45 | 313    |
| 5474 | 220.11 | 534.78 | 714.17 | 671.96 | 312.8  |
| 5476 | 220.02 | 534.76 | 714.25 | 671.37 | 312.55 |

|      |        |        |        |        |        |
|------|--------|--------|--------|--------|--------|
| 5478 | 219.93 | 534.74 | 714.32 | 670.84 | 312.35 |
| 5480 | 219.77 | 534.7  | 714.36 | 670.25 | 312.02 |
| 5482 | 219.71 | 534.71 | 714.49 | 669.75 | 311.81 |
| 5484 | 219.61 | 534.71 | 714.58 | 669.12 | 311.55 |
| 5486 | 219.52 | 534.7  | 714.67 | 668.56 | 311.32 |
| 5488 | 219.41 | 534.68 | 714.74 | 668    | 311.08 |
| 5490 | 219.32 | 534.68 | 714.85 | 667.44 | 310.8  |
| 5492 | 219.24 | 534.68 | 714.95 | 666.78 | 310.51 |
| 5494 | 219.15 | 534.69 | 715.04 | 666.2  | 310.23 |
| 5496 | 219.05 | 534.69 | 715.14 | 665.61 | 309.98 |
| 5498 | 218.96 | 534.7  | 715.23 | 664.9  | 309.75 |
| 5500 | 218.87 | 534.71 | 715.32 | 664.28 | 309.47 |
| 5502 | 218.76 | 534.69 | 715.38 | 663.64 | 309.2  |
| 5504 | 218.68 | 534.72 | 715.45 | 663.02 | 308.96 |
| 5506 | 218.57 | 534.72 | 715.5  | 662.34 | 308.69 |
| 5508 | 218.51 | 534.75 | 715.6  | 661.6  | 308.41 |
| 5510 | 218.42 | 534.75 | 715.66 | 660.91 | 308.12 |
| 5512 | 218.32 | 534.77 | 715.74 | 660.21 | 307.82 |
| 5514 | 218.22 | 534.78 | 715.83 | 659.5  | 307.54 |
| 5516 | 218.18 | 534.85 | 716    | 658.72 | 307.31 |
| 5518 | 218.09 | 534.87 | 716.13 | 658.01 | 307.01 |
| 5520 | 218.01 | 534.89 | 716.26 | 657.29 | 306.72 |
| 5522 | 217.93 | 534.94 | 716.43 | 656.59 | 306.45 |
| 5524 | 217.88 | 535.01 | 716.61 | 655.76 | 306.2  |
| 5526 | 217.84 | 535.08 | 716.8  | 655.06 | 305.91 |
| 5528 | 217.78 | 535.14 | 716.96 | 654.33 | 305.6  |
| 5530 | 217.71 | 535.19 | 717.13 | 653.61 | 305.31 |
| 5532 | 217.66 | 535.25 | 717.29 | 652.88 | 305    |
| 5534 | 217.55 | 535.3  | 717.44 | 652.01 | 304.66 |
| 5536 | 217.48 | 535.37 | 717.6  | 651.3  | 304.42 |
| 5538 | 217.45 | 535.46 | 717.76 | 650.59 | 304.18 |
| 5540 | 217.4  | 535.57 | 717.91 | 649.85 | 303.93 |
| 5542 | 217.34 | 535.66 | 718.09 | 649.02 | 303.68 |
| 5544 | 217.28 | 535.72 | 718.21 | 648.29 | 303.37 |
| 5546 | 217.24 | 535.82 | 718.36 | 647.57 | 303.1  |
| 5548 | 217.12 | 535.87 | 718.44 | 646.8  | 302.77 |
| 5550 | 217.11 | 536.01 | 718.61 | 645.97 | 302.48 |
| 5552 | 217.06 | 536.12 | 718.73 | 645.26 | 302.2  |
| 5554 | 217.02 | 536.22 | 718.84 | 644.54 | 301.92 |
| 5556 | 216.95 | 536.33 | 718.93 | 643.8  | 301.61 |
| 5558 | 216.88 | 536.43 | 719.07 | 642.96 | 301.35 |
| 5560 | 216.84 | 536.54 | 719.18 | 642.22 | 301.03 |
| 5562 | 216.75 | 536.61 | 719.25 | 641.49 | 300.7  |
| 5564 | 216.74 | 536.75 | 719.37 | 640.79 | 300.42 |

|      |        |        |        |        |        |
|------|--------|--------|--------|--------|--------|
| 5566 | 216.68 | 536.86 | 719.47 | 639.91 | 300.12 |
| 5568 | 216.62 | 536.96 | 719.54 | 639.16 | 299.74 |
| 5570 | 216.59 | 537.09 | 719.66 | 638.46 | 299.46 |
| 5572 | 216.54 | 537.2  | 719.75 | 637.72 | 299.16 |
| 5574 | 216.48 | 537.32 | 719.83 | 636.96 | 298.83 |
| 5576 | 216.4  | 537.4  | 719.89 | 636.04 | 298.43 |
| 5578 | 216.33 | 537.51 | 719.96 | 635.29 | 298.13 |
| 5580 | 216.27 | 537.62 | 720.04 | 634.54 | 297.87 |
| 5582 | 216.24 | 537.78 | 720.11 | 633.78 | 297.61 |
| 5584 | 216.21 | 537.92 | 720.21 | 632.91 | 297.37 |
| 5586 | 216.14 | 538.03 | 720.24 | 632.16 | 297.09 |
| 5588 | 216.08 | 538.15 | 720.28 | 631.42 | 296.87 |
| 5590 | 216.02 | 538.28 | 720.33 | 630.69 | 296.65 |
| 5592 | 215.97 | 538.43 | 720.37 | 629.84 | 296.38 |
| 5594 | 215.93 | 538.58 | 720.4  | 629.12 | 296.05 |
| 5596 | 215.85 | 538.7  | 720.41 | 628.39 | 295.77 |
| 5598 | 215.77 | 538.83 | 720.41 | 627.68 | 295.48 |
| 5600 | 215.7  | 538.97 | 720.37 | 626.95 | 295.19 |
| 5602 | 215.61 | 539.08 | 720.35 | 626.12 | 294.83 |
| 5604 | 215.56 | 539.23 | 720.36 | 625.45 | 294.57 |
| 5606 | 215.51 | 539.42 | 720.34 | 624.78 | 294.29 |
| 5608 | 215.47 | 539.57 | 720.31 | 624.14 | 294.04 |
| 5610 | 215.39 | 539.71 | 720.26 | 623.47 | 293.74 |
| 5612 | 215.29 | 539.83 | 720.18 | 622.65 | 293.36 |
| 5614 | 215.21 | 539.98 | 720.1  | 621.98 | 293.06 |
| 5616 | 215.14 | 540.12 | 719.99 | 621.31 | 292.76 |
| 5618 | 215.06 | 540.25 | 719.9  | 620.54 | 292.49 |
| 5620 | 214.99 | 540.39 | 719.81 | 619.92 | 292.19 |
| 5622 | 214.94 | 540.55 | 719.73 | 619.3  | 291.93 |
| 5624 | 214.84 | 540.69 | 719.6  | 618.63 | 291.63 |
| 5626 | 214.78 | 540.84 | 719.49 | 617.89 | 291.32 |
| 5628 | 214.7  | 540.98 | 719.38 | 617.26 | 291.02 |
| 5630 | 214.66 | 541.15 | 719.27 | 616.65 | 290.74 |
| 5632 | 214.54 | 541.25 | 719.12 | 615.99 | 290.38 |
| 5634 | 214.46 | 541.42 | 718.96 | 615.26 | 290.05 |
| 5636 | 214.41 | 541.61 | 718.86 | 614.67 | 289.68 |
| 5638 | 214.34 | 541.76 | 718.73 | 614.07 | 289.36 |
| 5640 | 214.28 | 541.97 | 718.6  | 613.47 | 289.07 |
| 5642 | 214.2  | 542.11 | 718.42 | 612.76 | 288.76 |
| 5644 | 214.12 | 542.26 | 718.26 | 612.16 | 288.41 |
| 5646 | 214.07 | 542.44 | 718.1  | 611.57 | 288.11 |
| 5648 | 214.01 | 542.62 | 717.96 | 610.99 | 287.84 |
| 5650 | 213.95 | 542.84 | 717.77 | 610.32 | 287.51 |
| 5652 | 213.86 | 543    | 717.59 | 609.71 | 287.09 |



|      |        |        |        |        |        |
|------|--------|--------|--------|--------|--------|
| 5654 | 213.77 | 543.17 | 717.4  | 609.1  | 286.73 |
| 5656 | 213.68 | 543.35 | 717.22 | 608.51 | 286.39 |
| 5658 | 213.6  | 543.57 | 717    | 607.93 | 286.07 |
| 5660 | 213.52 | 543.76 | 716.79 | 607.22 | 285.76 |
| 5662 | 213.46 | 543.97 | 716.62 | 606.66 | 285.47 |
| 5664 | 213.39 | 544.23 | 716.44 | 606.12 | 285.23 |
| 5666 | 213.29 | 544.43 | 716.19 | 605.51 | 284.94 |
| 5668 | 213.22 | 544.65 | 715.99 | 604.83 | 284.61 |
| 5670 | 213.13 | 544.86 | 715.77 | 604.27 | 284.32 |
| 5672 | 213.07 | 545.1  | 715.58 | 603.71 | 284.05 |
| 5674 | 213    | 545.37 | 715.33 | 603.13 | 283.75 |
| 5676 | 212.9  | 545.58 | 715.09 | 602.54 | 283.39 |
| 5678 | 212.82 | 545.81 | 714.87 | 601.89 | 282.96 |
| 5680 | 212.75 | 546.04 | 714.67 | 601.33 | 282.67 |
| 5682 | 212.65 | 546.31 | 714.44 | 600.75 | 282.27 |
| 5684 | 212.57 | 546.55 | 714.18 | 600.11 | 281.95 |
| 5686 | 212.51 | 546.8  | 713.95 | 599.56 | 281.62 |
| 5688 | 212.4  | 547.04 | 713.71 | 598.99 | 281.33 |
| 5690 | 212.34 | 547.34 | 713.51 | 598.47 | 281.08 |
| 5692 | 212.2  | 547.61 | 713.19 | 597.78 | 280.74 |
| 5694 | 212.11 | 547.9  | 712.97 | 597.23 | 280.38 |
| 5696 | 212.02 | 548.16 | 712.71 | 596.67 | 280.05 |
| 5698 | 211.87 | 548.41 | 712.44 | 596.09 | 279.7  |
| 5700 | 211.76 | 548.71 | 712.14 | 595.53 | 279.37 |
| 5702 | 211.65 | 548.98 | 711.89 | 594.89 | 279.04 |
| 5704 | 211.59 | 549.28 | 711.69 | 594.38 | 278.7  |
| 5706 | 211.49 | 549.55 | 711.45 | 593.85 | 278.37 |
| 5708 | 211.34 | 549.83 | 711.15 | 593.27 | 278.01 |
| 5710 | 211.21 | 550.06 | 710.91 | 592.61 | 277.67 |
| 5712 | 211.06 | 550.26 | 710.64 | 592.03 | 277.26 |
| 5714 | 210.94 | 550.47 | 710.41 | 591.48 | 276.95 |
| 5716 | 210.8  | 550.67 | 710.17 | 590.92 | 276.61 |
| 5718 | 210.68 | 550.9  | 709.91 | 590.27 | 276.25 |
| 5720 | 210.57 | 551.09 | 709.72 | 589.72 | 276.01 |
| 5722 | 210.43 | 551.27 | 709.51 | 589.16 | 275.65 |
| 5724 | 210.3  | 551.48 | 709.33 | 588.61 | 275.34 |
| 5726 | 210.17 | 551.65 | 709.12 | 587.97 | 275.01 |
| 5728 | 210.05 | 551.8  | 708.94 | 587.44 | 274.6  |
| 5730 | 209.93 | 551.96 | 708.76 | 586.88 | 274.25 |
| 5732 | 209.79 | 552.11 | 708.57 | 586.33 | 273.95 |
| 5734 | 209.64 | 552.24 | 708.35 | 585.78 | 273.64 |
| 5736 | 209.52 | 552.36 | 708.14 | 585.13 | 273.29 |
| 5738 | 209.39 | 552.48 | 707.96 | 584.58 | 272.99 |
| 5740 | 209.26 | 552.6  | 707.78 | 584.05 | 272.68 |

|      |        |        |        |        |        |
|------|--------|--------|--------|--------|--------|
| 5742 | 209.1  | 552.68 | 707.52 | 583.49 | 272.34 |
| 5744 | 208.98 | 552.76 | 707.32 | 582.84 | 271.97 |
| 5746 | 208.86 | 552.82 | 707.11 | 582.3  | 271.67 |
| 5748 | 208.7  | 552.84 | 706.85 | 581.71 | 271.35 |
| 5750 | 208.57 | 552.89 | 706.63 | 581.19 | 271.1  |
| 5752 | 208.46 | 552.9  | 706.35 | 580.55 | 270.82 |
| 5754 | 208.31 | 552.87 | 706.09 | 579.98 | 270.46 |
| 5756 | 208.16 | 552.87 | 705.84 | 579.44 | 270.18 |
| 5758 | 208.03 | 552.82 | 705.53 | 578.88 | 269.87 |
| 5760 | 207.86 | 552.74 | 705.24 | 578.19 | 269.55 |
| 5762 | 207.76 | 552.7  | 704.98 | 577.65 | 269.19 |
| 5764 | 207.59 | 552.62 | 704.7  | 577.09 | 268.88 |
| 5766 | 207.43 | 552.53 | 704.37 | 576.54 | 268.57 |
| 5768 | 207.27 | 552.42 | 704.07 | 575.85 | 268.19 |
| 5770 | 207.13 | 552.33 | 703.79 | 575.29 | 267.86 |
| 5772 | 207.05 | 552.28 | 703.58 | 574.77 | 267.57 |
| 5774 | 206.88 | 552.18 | 703.32 | 574.19 | 267.22 |
| 5776 | 206.75 | 552.09 | 703.02 | 573.64 | 266.93 |
| 5778 | 206.61 | 551.99 | 702.78 | 572.97 | 266.56 |
| 5780 | 206.48 | 551.89 | 702.52 | 572.41 | 266.26 |
| 5782 | 206.31 | 551.78 | 702.26 | 571.87 | 265.95 |
| 5784 | 206.18 | 551.69 | 701.98 | 571.24 | 265.65 |
| 5786 | 206.06 | 551.62 | 701.74 | 570.68 | 265.32 |
| 5788 | 205.91 | 551.53 | 701.48 | 570.13 | 265.02 |
| 5790 | 205.77 | 551.43 | 701.22 | 569.57 | 264.7  |
| 5792 | 205.65 | 551.35 | 700.94 | 568.93 | 264.35 |
| 5794 | 205.51 | 551.26 | 700.67 | 568.35 | 264.04 |
| 5796 | 205.37 | 551.18 | 700.42 | 567.81 | 263.75 |
| 5798 | 205.25 | 551.09 | 700.12 | 567.26 | 263.44 |
| 5800 | 205.12 | 551.01 | 699.84 | 566.73 | 263.12 |
| 5802 | 204.98 | 550.91 | 699.57 | 566.09 | 262.77 |
| 5804 | 204.88 | 550.83 | 699.3  | 565.55 | 262.5  |
| 5806 | 204.73 | 550.71 | 699.02 | 564.99 | 262.22 |
| 5808 | 204.6  | 550.6  | 698.69 | 564.35 | 261.92 |
| 5810 | 204.48 | 550.49 | 698.41 | 563.8  | 261.56 |
| 5812 | 204.37 | 550.41 | 698.15 | 563.25 | 261.25 |
| 5814 | 204.22 | 550.32 | 697.88 | 562.71 | 260.92 |
| 5816 | 204.11 | 550.23 | 697.61 | 562.19 | 260.63 |
| 5818 | 203.97 | 550.14 | 697.35 | 561.56 | 260.28 |
| 5820 | 203.87 | 550.07 | 697.13 | 561.04 | 260    |
| 5822 | 203.78 | 550.04 | 696.98 | 560.55 | 259.76 |
| 5824 | 203.66 | 549.98 | 696.76 | 559.93 | 259.49 |
| 5826 | 203.55 | 549.93 | 696.57 | 559.41 | 259.15 |
| 5828 | 203.43 | 549.88 | 696.41 | 558.89 | 258.87 |

|      |        |        |        |        |        |
|------|--------|--------|--------|--------|--------|
| 5830 | 203.3  | 549.82 | 696.27 | 558.37 | 258.59 |
| 5832 | 203.19 | 549.8  | 696.15 | 557.85 | 258.3  |
| 5834 | 203.08 | 549.78 | 696.03 | 557.26 | 257.95 |
| 5836 | 202.95 | 549.75 | 695.93 | 556.73 | 257.67 |
| 5838 | 202.83 | 549.74 | 695.85 | 556.23 | 257.4  |
| 5840 | 202.71 | 549.75 | 695.78 | 555.71 | 257.11 |
| 5842 | 202.59 | 549.75 | 695.72 | 555.1  | 256.81 |
| 5844 | 202.49 | 549.75 | 695.68 | 554.61 | 256.48 |
| 5846 | 202.37 | 549.77 | 695.67 | 554.14 | 256.21 |
| 5848 | 202.21 | 549.74 | 695.6  | 553.61 | 255.88 |
| 5850 | 202.07 | 549.71 | 695.57 | 553    | 255.57 |
| 5852 | 201.94 | 549.68 | 695.53 | 552.5  | 255.21 |
| 5854 | 201.81 | 549.64 | 695.47 | 551.98 | 254.88 |
| 5856 | 201.67 | 549.58 | 695.43 | 551.49 | 254.59 |
| 5858 | 201.54 | 549.51 | 695.36 | 551    | 254.32 |
| 5860 | 201.43 | 549.43 | 695.28 | 550.45 | 253.98 |
| 5862 | 201.3  | 549.31 | 695.19 | 549.94 | 253.67 |
| 5864 | 201.13 | 549.15 | 695.07 | 549.42 | 253.39 |
| 5866 | 201    | 549.01 | 694.94 | 548.85 | 253.13 |
| 5868 | 200.88 | 548.85 | 694.81 | 548.36 | 252.84 |
| 5870 | 200.74 | 548.68 | 694.68 | 547.86 | 252.6  |
| 5872 | 200.59 | 548.49 | 694.53 | 547.35 | 252.35 |
| 5874 | 200.48 | 548.26 | 694.37 | 546.88 | 252.13 |
| 5876 | 200.33 | 548.03 | 694.19 | 546.29 | 251.83 |
| 5878 | 200.19 | 547.78 | 694.02 | 545.8  | 251.57 |
| 5880 | 200.02 | 547.46 | 693.83 | 545.3  | 251.29 |
| 5882 | 199.88 | 547.19 | 693.62 | 544.72 | 251.02 |
| 5884 | 199.75 | 546.91 | 693.42 | 544.22 | 250.7  |
| 5886 | 199.6  | 546.59 | 693.2  | 543.71 | 250.4  |
| 5888 | 199.43 | 546.25 | 692.97 | 543.2  | 250.11 |
| 5890 | 199.28 | 545.88 | 692.74 | 542.73 | 249.84 |
| 5892 | 199.15 | 545.54 | 692.51 | 542.19 | 249.52 |
| 5894 | 199.01 | 545.18 | 692.26 | 541.69 | 249.23 |
| 5896 | 198.86 | 544.79 | 692    | 541.19 | 248.93 |
| 5898 | 198.7  | 544.33 | 691.77 | 540.72 | 248.67 |
| 5900 | 198.54 | 543.9  | 691.44 | 540.13 | 248.35 |
| 5902 | 198.42 | 543.51 | 691.19 | 539.67 | 248.07 |
| 5904 | 198.26 | 543.08 | 690.9  | 539.19 | 247.81 |
| 5906 | 198.09 | 542.55 | 690.56 | 538.68 | 247.57 |
| 5908 | 197.93 | 542.08 | 690.25 | 538.08 | 247.29 |
| 5910 | 197.8  | 541.63 | 689.96 | 537.61 | 247.05 |
| 5912 | 197.62 | 541.13 | 689.63 | 537.12 | 246.77 |
| 5914 | 197.48 | 540.57 | 689.32 | 536.65 | 246.5  |
| 5916 | 197.32 | 540.07 | 688.93 | 536.06 | 246.22 |

|      |        |        |        |        |        |
|------|--------|--------|--------|--------|--------|
| 5918 | 197.2  | 539.6  | 688.61 | 535.58 | 245.94 |
| 5920 | 197.08 | 539.1  | 688.3  | 535.11 | 245.71 |
| 5922 | 196.9  | 538.47 | 687.94 | 534.61 | 245.45 |
| 5924 | 196.75 | 537.94 | 687.55 | 534.05 | 245.2  |
| 5926 | 196.61 | 537.41 | 687.2  | 533.56 | 244.94 |
| 5928 | 196.46 | 536.88 | 686.84 | 533.07 | 244.72 |
| 5930 | 196.28 | 536.32 | 686.48 | 532.58 | 244.51 |
| 5932 | 196.14 | 535.65 | 686.04 | 532.1  | 244.28 |
| 5934 | 196.02 | 535.07 | 685.68 | 531.56 | 244.09 |
| 5936 | 195.9  | 534.51 | 685.32 | 531.11 | 243.84 |
| 5938 | 195.72 | 533.82 | 684.94 | 530.62 | 243.64 |
| 5940 | 195.57 | 533.19 | 684.46 | 530.02 | 243.41 |
| 5942 | 195.39 | 532.54 | 684.04 | 529.51 | 243.13 |
| 5944 | 195.24 | 531.9  | 683.62 | 529.01 | 242.92 |
| 5946 | 195.03 | 531.23 | 683.18 | 528.52 | 242.68 |
| 5948 | 194.91 | 530.46 | 682.68 | 527.98 | 242.47 |
| 5950 | 194.77 | 529.77 | 682.25 | 527.48 | 242.23 |
| 5952 | 194.62 | 529.07 | 681.8  | 526.99 | 242.01 |
| 5954 | 194.44 | 528.35 | 681.33 | 526.51 | 241.78 |
| 5956 | 194.29 | 527.46 | 680.78 | 526.03 | 241.54 |
| 5958 | 194.12 | 526.66 | 680.28 | 525.45 | 241.31 |
| 5960 | 193.94 | 525.83 | 679.75 | 524.93 | 240.99 |
| 5962 | 193.81 | 524.91 | 679.25 | 524.49 | 240.81 |
| 5964 | 193.64 | 524.03 | 678.62 | 523.98 | 240.55 |
| 5966 | 193.48 | 523.16 | 678.06 | 523.42 | 240.27 |
| 5968 | 193.34 | 522.3  | 677.53 | 522.95 | 240.05 |
| 5970 | 193.16 | 521.42 | 676.97 | 522.44 | 239.8  |
| 5972 | 192.99 | 520.45 | 676.47 | 521.99 | 239.62 |
| 5974 | 192.83 | 519.64 | 675.83 | 521.42 | 239.37 |
| 5976 | 192.67 | 518.86 | 675.3  | 520.9  | 239.13 |
| 5978 | 192.5  | 518.1  | 674.78 | 520.45 | 238.93 |
| 5980 | 192.36 | 517.26 | 674.25 | 519.97 | 238.71 |
| 5982 | 192.18 | 516.57 | 673.63 | 519.42 | 238.5  |
| 5984 | 192.01 | 515.89 | 673.09 | 518.91 | 238.24 |
| 5986 | 191.86 | 515.25 | 672.57 | 518.44 | 238.04 |
| 5988 | 191.69 | 514.65 | 672.08 | 517.98 | 237.83 |
| 5990 | 191.57 | 513.96 | 671.49 | 517.5  | 237.63 |
| 5992 | 191.38 | 513.31 | 670.92 | 516.9  | 237.33 |
| 5994 | 191.23 | 512.72 | 670.42 | 516.44 | 237.11 |
| 5996 | 191.07 | 512.14 | 669.91 | 515.98 | 236.92 |
| 5998 | 190.9  | 511.41 | 669.28 | 515.48 | 236.68 |
| 6000 | 190.73 | 510.75 | 668.73 | 514.91 | 236.42 |
| 6002 | 190.56 | 510.05 | 668.18 | 514.42 | 236.16 |
| 6004 | 190.42 | 509.26 | 667.65 | 513.96 | 235.97 |

|      |        |        |        |        |        |
|------|--------|--------|--------|--------|--------|
| 6006 | 190.25 | 508.52 | 667    | 513.37 | 235.73 |
| 6008 | 190.11 | 507.79 | 666.44 | 512.9  | 235.47 |
| 6010 | 189.96 | 507.03 | 665.88 | 512.44 | 235.25 |
| 6012 | 189.77 | 506.23 | 665.27 | 511.94 | 235    |
| 6014 | 189.62 | 505.35 | 664.71 | 511.47 | 234.79 |
| 6016 | 189.47 | 504.58 | 664.04 | 510.91 | 234.57 |
| 6018 | 189.32 | 503.8  | 663.45 | 510.42 | 234.29 |
| 6020 | 189.14 | 503.03 | 662.86 | 509.93 | 234.06 |
| 6022 | 188.97 | 502.11 | 662.17 | 509.44 | 233.8  |
| 6024 | 188.83 | 501.36 | 661.59 | 508.9  | 233.55 |
| 6026 | 188.67 | 500.6  | 660.98 | 508.41 | 233.32 |
| 6028 | 188.51 | 499.84 | 660.37 | 507.93 | 233.09 |
| 6030 | 188.35 | 499.09 | 659.76 | 507.45 | 232.88 |
| 6032 | 188.22 | 498.25 | 659.08 | 506.91 | 232.63 |
| 6034 | 188.03 | 497.48 | 658.43 | 506.4  | 232.38 |
| 6036 | 187.84 | 496.73 | 657.79 | 505.9  | 232.13 |
| 6038 | 187.72 | 496    | 657.18 | 505.44 | 231.91 |
| 6040 | 187.55 | 495.16 | 656.47 | 504.89 | 231.67 |
| 6042 | 187.38 | 494.42 | 655.81 | 504.39 | 231.4  |
| 6044 | 187.21 | 493.67 | 655.16 | 503.87 | 231.15 |
| 6046 | 187.03 | 492.86 | 654.42 | 503.41 | 230.94 |
| 6048 | 186.88 | 492.15 | 653.78 | 502.85 | 230.68 |
| 6050 | 186.72 | 491.43 | 653.12 | 502.35 | 230.44 |
| 6052 | 186.57 | 490.73 | 652.5  | 501.87 | 230.23 |
| 6054 | 186.41 | 489.93 | 651.87 | 501.4  | 230.03 |
| 6056 | 186.23 | 489.23 | 651.1  | 500.91 | 229.8  |
| 6058 | 186.07 | 488.52 | 650.45 | 500.33 | 229.58 |
| 6060 | 185.89 | 487.8  | 649.77 | 499.82 | 229.29 |
| 6062 | 185.69 | 487.08 | 649.09 | 499.31 | 229.05 |
| 6064 | 185.53 | 486.3  | 648.36 | 498.86 | 228.86 |
| 6066 | 185.4  | 485.64 | 647.74 | 498.31 | 228.59 |
| 6068 | 185.23 | 484.96 | 647.08 | 497.84 | 228.33 |
| 6070 | 185.02 | 484.27 | 646.41 | 497.34 | 228.07 |
| 6072 | 184.83 | 483.44 | 645.61 | 496.73 | 227.78 |
| 6074 | 184.71 | 482.81 | 644.98 | 496.28 | 227.53 |
| 6076 | 184.54 | 482.13 | 644.34 | 495.8  | 227.32 |
| 6078 | 184.37 | 481.45 | 643.71 | 495.33 | 227.11 |
| 6080 | 184.23 | 480.7  | 642.96 | 494.87 | 226.9  |
| 6082 | 184.07 | 480.03 | 642.3  | 494.31 | 226.62 |
| 6084 | 183.92 | 479.36 | 641.65 | 493.81 | 226.4  |
| 6086 | 183.74 | 478.67 | 641.01 | 493.32 | 226.14 |
| 6088 | 183.55 | 477.89 | 640.32 | 492.81 | 225.91 |
| 6090 | 183.4  | 477.25 | 639.6  | 492.28 | 225.68 |
| 6092 | 183.25 | 476.58 | 638.95 | 491.8  | 225.44 |

|      |        |        |        |        |        |
|------|--------|--------|--------|--------|--------|
| 6094 | 183.06 | 475.79 | 638.3  | 491.31 | 225.17 |
| 6096 | 182.91 | 475.12 | 637.56 | 490.75 | 224.9  |
| 6098 | 182.76 | 474.46 | 636.94 | 490.28 | 224.62 |
| 6100 | 182.58 | 473.77 | 636.27 | 489.79 | 224.36 |
| 6102 | 182.4  | 473.09 | 635.62 | 489.31 | 224.09 |
| 6104 | 182.22 | 472.32 | 634.87 | 488.73 | 223.84 |
| 6106 | 182.02 | 471.6  | 634.19 | 488.21 | 223.53 |
| 6108 | 181.91 | 470.96 | 633.6  | 487.79 | 223.33 |
| 6110 | 181.77 | 470.3  | 632.96 | 487.32 | 223.09 |
| 6112 | 181.54 | 469.47 | 632.3  | 486.81 | 222.81 |
| 6114 | 181.37 | 468.78 | 631.54 | 486.22 | 222.55 |
| 6116 | 181.18 | 468.09 | 630.88 | 485.72 | 222.22 |
| 6118 | 181.02 | 467.3  | 630.25 | 485.27 | 221.96 |
| 6120 | 180.89 | 466.65 | 629.52 | 484.81 | 221.71 |
| 6122 | 180.72 | 465.97 | 628.88 | 484.27 | 221.4  |
| 6124 | 180.57 | 465.27 | 628.24 | 483.8  | 221.16 |
| 6126 | 180.4  | 464.59 | 627.58 | 483.3  | 220.92 |
| 6128 | 180.18 | 463.77 | 626.91 | 482.79 | 220.66 |
| 6130 | 180.05 | 463.13 | 626.2  | 482.34 | 220.46 |
| 6132 | 179.89 | 462.45 | 625.56 | 481.77 | 220.18 |
| 6134 | 179.72 | 461.8  | 624.95 | 481.31 | 219.96 |
| 6136 | 179.54 | 460.99 | 624.29 | 480.8  | 219.69 |
| 6138 | 179.41 | 460.33 | 623.56 | 480.27 | 219.47 |
| 6140 | 179.25 | 459.67 | 622.91 | 479.78 | 219.17 |
| 6142 | 179.05 | 458.96 | 622.24 | 479.25 | 218.86 |
| 6144 | 178.86 | 458.18 | 621.5  | 478.75 | 218.6  |
| 6146 | 178.68 | 457.5  | 620.85 | 478.17 | 218.27 |
| 6148 | 178.48 | 456.81 | 620.19 | 477.65 | 217.99 |
| 6150 | 178.33 | 456.16 | 619.57 | 477.19 | 217.72 |
| 6152 | 178.15 | 455.39 | 618.95 | 476.7  | 217.45 |
| 6154 | 177.96 | 454.72 | 618.18 | 476.18 | 217.18 |
| 6156 | 177.81 | 454.07 | 617.57 | 475.61 | 216.89 |
| 6158 | 177.65 | 453.42 | 616.95 | 475.11 | 216.63 |
| 6160 | 177.43 | 452.78 | 616.29 | 474.59 | 216.36 |
| 6162 | 177.24 | 451.98 | 615.53 | 473.95 | 216.07 |
| 6164 | 177.09 | 451.34 | 614.9  | 473.46 | 215.81 |
| 6166 | 176.88 | 450.67 | 614.25 | 472.93 | 215.55 |
| 6168 | 176.71 | 450.05 | 613.64 | 472.44 | 215.32 |
| 6170 | 176.52 | 449.29 | 612.89 | 471.91 | 215.08 |
| 6172 | 176.38 | 448.69 | 612.3  | 471.35 | 214.86 |
| 6174 | 176.23 | 448.07 | 611.71 | 470.85 | 214.63 |
| 6176 | 176.03 | 447.34 | 611.06 | 470.3  | 214.35 |
| 6178 | 175.85 | 446.71 | 610.33 | 469.7  | 214.08 |
| 6180 | 175.69 | 446.09 | 609.72 | 469.18 | 213.8  |

|      |        |        |        |        |        |
|------|--------|--------|--------|--------|--------|
| 6182 | 175.54 | 445.49 | 609.1  | 468.66 | 213.57 |
| 6184 | 175.35 | 444.9  | 608.51 | 468.13 | 213.3  |
| 6186 | 175.15 | 444.13 | 607.75 | 467.57 | 213.02 |
| 6188 | 175    | 443.56 | 607.15 | 466.94 | 212.78 |
| 6190 | 174.8  | 442.92 | 606.49 | 466.37 | 212.49 |
| 6192 | 174.65 | 442.34 | 605.9  | 465.85 | 212.26 |
| 6194 | 174.45 | 441.62 | 605.17 | 465.28 | 212    |
| 6196 | 174.28 | 441.02 | 604.55 | 464.62 | 211.69 |
| 6198 | 174.05 | 440.38 | 603.89 | 464.01 | 211.42 |
| 6200 | 173.9  | 439.81 | 603.28 | 463.42 | 211.19 |
| 6202 | 173.68 | 439.09 | 602.55 | 462.73 | 210.95 |
| 6204 | 173.53 | 438.53 | 601.96 | 462.14 | 210.67 |
| 6206 | 173.37 | 437.97 | 601.36 | 461.54 | 210.46 |
| 6208 | 173.18 | 437.36 | 600.73 | 460.9  | 210.19 |
| 6210 | 172.99 | 436.69 | 600.11 | 460.26 | 209.93 |
| 6212 | 172.82 | 436.14 | 599.41 | 459.52 | 209.67 |
| 6214 | 172.62 | 435.55 | 598.77 | 458.84 | 209.33 |
| 6216 | 172.43 | 434.95 | 598.14 | 458.17 | 209.08 |
| 6218 | 172.2  | 434.35 | 597.47 | 457.48 | 208.8  |
| 6220 | 172.03 | 433.69 | 596.74 | 456.69 | 208.51 |
| 6222 | 171.85 | 433.14 | 596.11 | 455.98 | 208.24 |
| 6224 | 171.63 | 432.56 | 595.46 | 455.27 | 207.99 |
| 6226 | 171.46 | 431.91 | 594.82 | 454.56 | 207.72 |
| 6228 | 171.28 | 431.37 | 594.08 | 453.74 | 207.46 |
| 6230 | 171.11 | 430.82 | 593.42 | 453.03 | 207.15 |
| 6232 | 170.89 | 430.23 | 592.72 | 452.27 | 206.84 |
| 6234 | 170.76 | 429.64 | 592    | 451.61 | 206.63 |
| 6236 | 170.56 | 429.08 | 591.3  | 450.71 | 206.3  |
| 6238 | 170.39 | 428.54 | 590.63 | 449.97 | 206.04 |
| 6240 | 170.21 | 428    | 589.95 | 449.23 | 205.77 |
| 6242 | 170.01 | 427.46 | 589.25 | 448.49 | 205.49 |
| 6244 | 169.83 | 426.83 | 588.44 | 447.74 | 205.2  |
| 6246 | 169.67 | 426.33 | 587.77 | 446.9  | 204.91 |
| 6248 | 169.44 | 425.77 | 587.02 | 446.1  | 204.59 |
| 6250 | 169.28 | 425.18 | 586.33 | 445.37 | 204.32 |
| 6252 | 169.11 | 424.64 | 585.51 | 444.62 | 204.04 |
| 6254 | 168.93 | 424.14 | 584.78 | 443.75 | 203.69 |
| 6256 | 168.77 | 423.62 | 584.05 | 443.02 | 203.39 |
| 6258 | 168.56 | 423.01 | 583.2  | 442.27 | 203.07 |
| 6260 | 168.38 | 422.49 | 582.43 | 441.41 | 202.77 |
| 6262 | 168.21 | 421.97 | 581.67 | 440.69 | 202.41 |
| 6264 | 168.06 | 421.47 | 580.93 | 439.99 | 202.13 |
| 6266 | 167.86 | 420.97 | 580.15 | 439.25 | 201.83 |
| 6268 | 167.67 | 420.35 | 579.24 | 438.51 | 201.53 |

|      |        |        |        |        |        |
|------|--------|--------|--------|--------|--------|
| 6270 | 167.52 | 419.85 | 578.48 | 437.64 | 201.2  |
| 6272 | 167.38 | 419.35 | 577.71 | 436.87 | 200.88 |
| 6274 | 167.15 | 418.72 | 576.9  | 436.08 | 200.54 |
| 6276 | 166.97 | 418.2  | 575.97 | 435.14 | 200.22 |
| 6278 | 166.8  | 417.68 | 575.16 | 434.32 | 199.85 |
| 6280 | 166.65 | 417.17 | 574.36 | 433.51 | 199.56 |
| 6282 | 166.44 | 416.63 | 573.53 | 432.66 | 199.23 |
| 6284 | 166.27 | 416    | 572.56 | 431.8  | 198.93 |
| 6286 | 166.09 | 415.48 | 571.74 | 430.8  | 198.57 |
| 6288 | 165.93 | 414.95 | 570.91 | 429.92 | 198.26 |
| 6290 | 165.73 | 414.32 | 570.06 | 429.06 | 197.96 |
| 6292 | 165.57 | 413.77 | 569.07 | 428.19 | 197.66 |
| 6294 | 165.4  | 413.23 | 568.2  | 427.15 | 197.31 |
| 6296 | 165.23 | 412.69 | 567.33 | 426.26 | 196.98 |
| 6298 | 165.04 | 412.13 | 566.45 | 425.36 | 196.65 |
| 6300 | 164.86 | 411.49 | 565.43 | 424.32 | 196.35 |
| 6302 | 164.69 | 410.93 | 564.55 | 423.44 | 196.01 |
| 6304 | 164.51 | 410.36 | 563.64 | 422.52 | 195.67 |
| 6306 | 164.32 | 409.78 | 562.73 | 421.62 | 195.35 |
| 6308 | 164.17 | 409.13 | 561.84 | 420.75 | 195.04 |
| 6310 | 163.94 | 408.51 | 560.73 | 419.63 | 194.71 |
| 6312 | 163.79 | 407.96 | 559.83 | 418.74 | 194.34 |
| 6314 | 163.62 | 407.3  | 558.93 | 417.86 | 194.05 |
| 6316 | 163.47 | 406.72 | 557.89 | 416.96 | 193.75 |
| 6318 | 163.27 | 406.1  | 556.97 | 415.88 | 193.37 |
| 6320 | 163.11 | 405.53 | 556.13 | 415    | 193.08 |
| 6322 | 162.96 | 404.96 | 555.35 | 414.12 | 192.8  |
| 6324 | 162.74 | 404.33 | 554.59 | 413.17 | 192.47 |
| 6326 | 162.58 | 403.66 | 553.84 | 412.28 | 192.17 |
| 6328 | 162.43 | 403.08 | 553.24 | 411.24 | 191.84 |
| 6330 | 162.23 | 402.48 | 552.64 | 410.32 | 191.54 |
| 6332 | 162.05 | 401.79 | 552.04 | 409.39 | 191.22 |
| 6334 | 161.88 | 401.22 | 551.35 | 408.33 | 190.91 |
| 6336 | 161.73 | 400.68 | 550.8  | 407.43 | 190.59 |
| 6338 | 161.56 | 400.12 | 550.26 | 406.52 | 190.29 |
| 6340 | 161.34 | 399.44 | 549.7  | 405.57 | 189.96 |
| 6342 | 161.13 | 398.85 | 549.04 | 404.62 | 189.61 |
| 6344 | 160.97 | 398.3  | 548.55 | 403.52 | 189.23 |
| 6346 | 160.8  | 397.8  | 548.14 | 402.62 | 188.96 |
| 6348 | 160.59 | 397.14 | 547.68 | 401.65 | 188.61 |
| 6350 | 160.39 | 396.59 | 547.38 | 400.57 | 188.28 |
| 6352 | 160.22 | 396.05 | 547.11 | 399.63 | 187.91 |
| 6354 | 160.05 | 395.45 | 546.86 | 398.73 | 187.59 |
| 6356 | 159.84 | 394.89 | 546.45 | 397.78 | 187.23 |



|      |        |        |        |        |        |
|------|--------|--------|--------|--------|--------|
| 6358 | 159.69 | 394.38 | 546.07 | 396.73 | 186.88 |
| 6360 | 159.52 | 393.87 | 545.59 | 395.79 | 186.51 |
| 6362 | 159.28 | 393.35 | 545.09 | 394.85 | 186.16 |
| 6364 | 159.12 | 392.8  | 544.62 | 393.96 | 185.84 |
| 6366 | 158.93 | 392.29 | 544    | 393.02 | 185.46 |
| 6368 | 158.75 | 391.79 | 543.46 | 391.96 | 185.02 |
| 6370 | 158.54 | 391.26 | 542.86 | 391.05 | 184.67 |
| 6372 | 158.35 | 390.64 | 542.11 | 390.13 | 184.32 |
| 6374 | 158.17 | 390.09 | 541.42 | 389.06 | 183.93 |
| 6376 | 158    | 389.53 | 540.69 | 388.16 | 183.58 |
| 6378 | 157.79 | 388.92 | 539.9  | 387.21 | 183.22 |
| 6380 | 157.57 | 388.22 | 539    | 386.17 | 182.89 |
| 6382 | 157.4  | 387.63 | 538.26 | 385.29 | 182.53 |
| 6384 | 157.25 | 387.06 | 537.6  | 384.41 | 182.22 |
| 6386 | 157.06 | 386.46 | 536.95 | 383.5  | 181.9  |
| 6388 | 156.87 | 385.77 | 536.26 | 382.61 | 181.58 |
| 6390 | 156.71 | 385.15 | 535.72 | 381.72 | 181.27 |
| 6392 | 156.52 | 384.53 | 535.26 | 380.66 | 180.89 |
| 6394 | 156.35 | 383.92 | 534.93 | 379.77 | 180.57 |
| 6396 | 156.1  | 383.17 | 534.68 | 378.88 | 180.23 |
| 6398 | 155.95 | 382.59 | 534.58 | 377.86 | 179.85 |
| 6400 | 155.8  | 381.99 | 534.44 | 376.98 | 179.53 |
| 6402 | 155.62 | 381.39 | 534.25 | 376.11 | 179.21 |
| 6404 | 155.4  | 380.68 | 533.95 | 375.22 | 178.88 |
| 6406 | 155.25 | 380.1  | 533.49 | 374.23 | 178.59 |
| 6408 | 155.06 | 379.5  | 532.94 | 373.35 | 178.21 |
| 6410 | 154.84 | 378.91 | 532.25 | 372.49 | 177.87 |
| 6412 | 154.67 | 378.2  | 531.25 | 371.63 | 177.52 |
| 6414 | 154.5  | 377.61 | 530.34 | 370.65 | 177.16 |
| 6416 | 154.3  | 376.99 | 529.43 | 369.8  | 176.84 |
| 6418 | 154.14 | 376.39 | 528.54 | 368.95 | 176.51 |
| 6420 | 153.95 | 375.69 | 527.59 | 368.11 | 176.19 |
| 6422 | 153.76 | 375.05 | 526.36 | 367.26 | 175.87 |
| 6424 | 153.56 | 374.42 | 525.14 | 366.24 | 175.49 |
| 6426 | 153.39 | 373.82 | 523.79 | 365.41 | 175.22 |
| 6428 | 153.2  | 373.09 | 522.37 | 364.57 | 174.91 |
| 6430 | 153    | 372.44 | 520.62 | 363.55 | 174.57 |
| 6432 | 152.84 | 371.82 | 519.16 | 362.72 | 174.21 |
| 6434 | 152.66 | 371.18 | 517.68 | 361.88 | 173.9  |
| 6436 | 152.45 | 370.43 | 516    | 361.01 | 173.58 |
| 6438 | 152.25 | 369.76 | 514.55 | 360    | 173.19 |
| 6440 | 152.08 | 369.11 | 513.14 | 359.15 | 172.87 |
| 6442 | 151.91 | 368.46 | 511.77 | 358.31 | 172.55 |
| 6444 | 151.7  | 367.68 | 510.4  | 357.45 | 172.2  |

|      |        |        |        |        |        |
|------|--------|--------|--------|--------|--------|
| 6446 | 151.52 | 366.99 | 508.82 | 356.45 | 171.87 |
| 6448 | 151.35 | 366.33 | 507.51 | 355.61 | 171.5  |
| 6450 | 151.12 | 365.63 | 506.19 | 354.74 | 171.17 |
| 6452 | 150.97 | 364.85 | 504.7  | 353.91 | 170.88 |
| 6454 | 150.77 | 364.14 | 503.41 | 352.91 | 170.54 |
| 6456 | 150.59 | 363.43 | 502.11 | 352.06 | 170.16 |
| 6458 | 150.4  | 362.72 | 500.82 | 351.16 | 169.81 |
| 6460 | 150.18 | 362    | 499.53 | 350.3  | 169.46 |
| 6462 | 150    | 361.17 | 498.03 | 349.44 | 169.12 |
| 6464 | 149.81 | 360.45 | 496.73 | 348.42 | 168.71 |
| 6466 | 149.61 | 359.71 | 495.44 | 347.57 | 168.39 |
| 6468 | 149.42 | 358.89 | 494.16 | 346.72 | 168.06 |
| 6470 | 149.21 | 358.13 | 492.63 | 345.69 | 167.71 |
| 6472 | 149.02 | 357.39 | 491.31 | 344.83 | 167.31 |
| 6474 | 148.87 | 356.68 | 490.04 | 344    | 166.99 |
| 6476 | 148.64 | 355.94 | 488.73 | 343.16 | 166.65 |
| 6478 | 148.43 | 355.06 | 487.17 | 342.29 | 166.28 |
| 6480 | 148.27 | 354.34 | 485.87 | 341.34 | 165.92 |
| 6482 | 148.08 | 353.6  | 484.55 | 340.5  | 165.59 |
| 6484 | 147.87 | 352.72 | 483.22 | 339.64 | 165.25 |
| 6486 | 147.69 | 351.97 | 481.66 | 338.8  | 164.93 |
| 6488 | 147.47 | 351.18 | 480.3  | 337.78 | 164.51 |
| 6490 | 147.29 | 350.42 | 478.97 | 336.97 | 164.25 |
| 6492 | 147.09 | 349.55 | 477.63 | 336.13 | 163.87 |
| 6494 | 146.89 | 348.91 | 476.28 | 335.29 | 163.55 |
| 6496 | 146.73 | 348.03 | 474.71 | 334.31 | 163.2  |
| 6498 | 146.54 | 347.27 | 473.36 | 333.48 | 162.87 |
| 6500 | 146.33 | 346.48 | 472    | 332.66 | 162.53 |
| 6502 | 146.14 | 345.57 | 470.41 | 331.84 | 162.2  |
| 6504 | 145.91 | 344.77 | 469    | 330.83 | 161.83 |
| 6506 | 145.73 | 344    | 467.65 | 330    | 161.44 |
| 6508 | 145.52 | 343.1  | 466.28 | 329.17 | 161.11 |
| 6510 | 145.33 | 342.31 | 464.66 | 328.23 | 160.77 |
| 6512 | 145.15 | 341.54 | 463.3  | 327.41 | 160.37 |
| 6514 | 144.94 | 340.73 | 461.9  | 326.55 | 160    |
| 6516 | 144.75 | 339.98 | 460.55 | 325.76 | 159.69 |
| 6518 | 144.57 | 339.05 | 458.94 | 324.81 | 159.35 |
| 6520 | 144.38 | 338.26 | 457.55 | 323.99 | 158.95 |
| 6522 | 144.19 | 337.47 | 456.17 | 323.16 | 158.61 |
| 6524 | 143.98 | 336.55 | 454.78 | 322.34 | 158.27 |
| 6526 | 143.78 | 335.76 | 453.15 | 321.53 | 157.92 |
| 6528 | 143.57 | 334.95 | 451.75 | 320.58 | 157.52 |
| 6530 | 143.38 | 334.13 | 450.36 | 319.75 | 157.17 |
| 6532 | 143.21 | 333.35 | 448.98 | 318.96 | 156.86 |

|      |        |        |        |        |        |
|------|--------|--------|--------|--------|--------|
| 6534 | 142.92 | 332.38 | 447.31 | 317.98 | 156.47 |
| 6536 | 142.77 | 331.61 | 445.96 | 317.19 | 156.11 |
| 6538 | 142.58 | 330.8  | 444.55 | 316.37 | 155.77 |
| 6540 | 142.36 | 329.99 | 443.17 | 315.58 | 155.46 |
| 6542 | 142.16 | 329.05 | 441.53 | 314.79 | 155.15 |
| 6544 | 142.01 | 328.28 | 440.17 | 313.87 | 154.78 |
| 6546 | 141.79 | 327.48 | 438.78 | 313.06 | 154.44 |
| 6548 | 141.59 | 326.56 | 437.4  | 312.26 | 154.11 |
| 6550 | 141.36 | 325.73 | 435.77 | 311.31 | 153.76 |
| 6552 | 141.19 | 324.95 | 434.39 | 310.52 | 153.39 |
| 6554 | 140.99 | 324.16 | 433.03 | 309.74 | 153.07 |
| 6556 | 140.77 | 323.36 | 431.67 | 308.97 | 152.75 |
| 6558 | 140.59 | 322.43 | 430.29 | 308.2  | 152.43 |
| 6560 | 140.41 | 321.66 | 428.72 | 307.3  | 152.06 |
| 6562 | 140.21 | 320.86 | 427.33 | 306.51 | 151.71 |
| 6564 | 139.95 | 320.02 | 425.94 | 305.7  | 151.36 |
| 6566 | 139.77 | 319.09 | 424.35 | 304.92 | 151.03 |
| 6568 | 139.58 | 318.3  | 423    | 304.02 | 150.66 |
| 6570 | 139.39 | 317.5  | 421.64 | 303.25 | 150.35 |
| 6572 | 139.2  | 316.71 | 420.3  | 302.47 | 150.02 |
| 6574 | 138.99 | 315.8  | 418.97 | 301.73 | 149.71 |
| 6576 | 138.79 | 315.01 | 417.38 | 300.94 | 149.37 |
| 6578 | 138.6  | 314.2  | 416.04 | 300.02 | 148.98 |
| 6580 | 138.39 | 313.41 | 414.71 | 299.26 | 148.66 |
| 6582 | 138.19 | 312.49 | 413.14 | 298.5  | 148.3  |
| 6584 | 137.99 | 311.7  | 411.83 | 297.61 | 147.94 |
| 6586 | 137.79 | 310.91 | 410.49 | 296.85 | 147.61 |
| 6588 | 137.6  | 310.11 | 409.16 | 296.09 | 147.3  |
| 6590 | 137.38 | 309.21 | 407.65 | 295.23 | 147    |
| 6592 | 137.19 | 308.44 | 406.34 | 294.48 | 146.64 |
| 6594 | 137    | 307.66 | 405.05 | 293.71 | 146.33 |
| 6596 | 136.77 | 306.88 | 403.74 | 292.96 | 146.01 |
| 6598 | 136.58 | 305.98 | 402.23 | 292.23 | 145.69 |
| 6600 | 136.37 | 305.17 | 400.95 | 291.34 | 145.35 |
| 6602 | 136.2  | 304.42 | 399.67 | 290.61 | 144.98 |
| 6604 | 135.98 | 303.51 | 398.37 | 289.85 | 144.64 |
| 6606 | 135.78 | 302.74 | 396.91 | 289.01 | 144.33 |
| 6608 | 135.55 | 301.95 | 395.6  | 288.24 | 143.92 |
| 6610 | 135.35 | 301.16 | 394.32 | 287.49 | 143.59 |
| 6612 | 135.14 | 300.4  | 393.06 | 286.75 | 143.27 |
| 6614 | 134.93 | 299.5  | 391.8  | 286.01 | 142.93 |
| 6616 | 134.76 | 298.75 | 390.37 | 285.19 | 142.58 |
| 6618 | 134.56 | 297.98 | 389.12 | 284.47 | 142.25 |
| 6620 | 134.32 | 297.1  | 387.86 | 283.72 | 141.92 |

|      |        |        |        |        |        |
|------|--------|--------|--------|--------|--------|
| 6622 | 134.14 | 296.35 | 386.46 | 283.01 | 141.63 |
| 6624 | 133.93 | 295.58 | 385.21 | 282.14 | 141.21 |
| 6626 | 133.75 | 294.85 | 384.01 | 281.45 | 140.9  |
| 6628 | 133.58 | 294.1  | 382.79 | 280.75 | 140.58 |
| 6630 | 133.39 | 293.25 | 381.41 | 279.95 | 140.28 |
| 6632 | 133.21 | 292.52 | 380.21 | 279.23 | 139.92 |
| 6634 | 133    | 291.75 | 379    | 278.5  | 139.59 |
| 6636 | 132.76 | 291    | 377.81 | 277.79 | 139.28 |
| 6638 | 132.54 | 290.1  | 376.41 | 277.06 | 138.95 |
| 6640 | 132.36 | 289.39 | 375.24 | 276.26 | 138.66 |
| 6642 | 132.18 | 288.66 | 374.07 | 275.58 | 138.32 |
| 6644 | 132.02 | 287.96 | 372.92 | 274.92 | 138.05 |
| 6646 | 131.81 | 287.1  | 371.76 | 274.24 | 137.74 |
| 6648 | 131.61 | 286.35 | 370.39 | 273.53 | 137.42 |
| 6650 | 131.39 | 285.61 | 369.21 | 272.69 | 137.06 |
| 6652 | 131.19 | 284.9  | 368.06 | 272.01 | 136.77 |
| 6654 | 131    | 284.05 | 366.74 | 271.32 | 136.48 |
| 6656 | 130.8  | 283.32 | 365.58 | 270.51 | 136.12 |
| 6658 | 130.61 | 282.61 | 364.47 | 269.84 | 135.84 |
| 6660 | 130.44 | 281.9  | 363.35 | 269.16 | 135.54 |
| 6662 | 130.23 | 281.09 | 362.05 | 268.38 | 135.26 |
| 6664 | 130.04 | 280.38 | 360.93 | 267.7  | 134.91 |
| 6666 | 129.86 | 279.67 | 359.84 | 267.04 | 134.61 |
| 6668 | 129.67 | 278.96 | 358.72 | 266.36 | 134.31 |
| 6670 | 129.42 | 278.11 | 357.6  | 265.67 | 134    |
| 6672 | 129.26 | 277.42 | 356.36 | 264.93 | 133.73 |
| 6674 | 129.07 | 276.73 | 355.27 | 264.27 | 133.4  |
| 6676 | 128.86 | 275.93 | 354.19 | 263.62 | 133.1  |
| 6678 | 128.67 | 275.23 | 352.94 | 262.86 | 132.81 |
| 6680 | 128.49 | 274.56 | 351.89 | 262.22 | 132.49 |
| 6682 | 128.32 | 273.87 | 350.83 | 261.55 | 132.18 |
| 6684 | 128.09 | 273.15 | 349.74 | 260.89 | 131.86 |
| 6686 | 127.92 | 272.47 | 348.7  | 260.25 | 131.6  |
| 6688 | 127.72 | 271.66 | 347.46 | 259.48 | 131.26 |
| 6690 | 127.53 | 270.98 | 346.4  | 258.82 | 130.97 |
| 6692 | 127.31 | 270.18 | 345.35 | 258.16 | 130.68 |
| 6694 | 127.14 | 269.52 | 344.32 | 257.52 | 130.4  |
| 6696 | 126.95 | 268.83 | 343.11 | 256.77 | 130.11 |
| 6698 | 126.76 | 268.15 | 342.09 | 256.14 | 129.78 |
| 6700 | 126.54 | 267.36 | 341.08 | 255.5  | 129.49 |
| 6702 | 126.37 | 266.69 | 339.89 | 254.76 | 129.21 |
| 6704 | 126.18 | 266.02 | 338.87 | 254.14 | 128.88 |
| 6706 | 126    | 265.36 | 337.86 | 253.51 | 128.6  |
| 6708 | 125.77 | 264.68 | 336.85 | 252.87 | 128.3  |

|      |        |        |        |        |        |
|------|--------|--------|--------|--------|--------|
| 6710 | 125.56 | 263.88 | 335.66 | 252.21 | 127.99 |
| 6712 | 125.39 | 263.23 | 334.68 | 251.48 | 127.71 |
| 6714 | 125.21 | 262.58 | 333.69 | 250.88 | 127.38 |
| 6716 | 125.02 | 261.91 | 332.7  | 250.26 | 127.1  |
| 6718 | 124.83 | 261.17 | 331.73 | 249.64 | 126.84 |
| 6720 | 124.63 | 260.51 | 330.61 | 248.91 | 126.53 |
| 6722 | 124.46 | 259.88 | 329.63 | 248.31 | 126.28 |
| 6724 | 124.26 | 259.25 | 328.68 | 247.7  | 126.02 |
| 6726 | 124.04 | 258.45 | 327.71 | 247.07 | 125.72 |
| 6728 | 123.84 | 257.77 | 326.55 | 246.33 | 125.35 |
| 6730 | 123.66 | 257.14 | 325.61 | 245.73 | 125.1  |
| 6732 | 123.46 | 256.52 | 324.67 | 245.13 | 124.82 |
| 6734 | 123.27 | 255.76 | 323.55 | 244.51 | 124.52 |
| 6736 | 123.1  | 255.13 | 322.61 | 243.83 | 124.2  |
| 6738 | 122.95 | 254.54 | 321.72 | 243.27 | 123.97 |
| 6740 | 122.76 | 253.89 | 320.77 | 242.64 | 123.68 |
| 6742 | 122.55 | 253.14 | 319.84 | 242.05 | 123.42 |
| 6744 | 122.42 | 252.56 | 318.82 | 241.4  | 123.2  |
| 6746 | 122.23 | 251.92 | 317.89 | 240.79 | 122.88 |
| 6748 | 122.02 | 251.3  | 316.97 | 240.2  | 122.61 |
| 6750 | 121.8  | 250.56 | 315.89 | 239.58 | 122.31 |
| 6752 | 121.65 | 249.97 | 315.02 | 238.91 | 122.08 |
| 6754 | 121.49 | 249.36 | 314.13 | 238.35 | 121.78 |
| 6756 | 121.32 | 248.74 | 313.23 | 237.77 | 121.51 |
| 6758 | 121.11 | 248.03 | 312.19 | 237.09 | 121.25 |
| 6760 | 120.94 | 247.42 | 311.31 | 236.51 | 120.95 |
| 6762 | 120.76 | 246.82 | 310.42 | 235.94 | 120.68 |
| 6764 | 120.59 | 246.21 | 309.55 | 235.38 | 120.42 |
| 6766 | 120.38 | 245.5  | 308.53 | 234.8  | 120.15 |
| 6768 | 120.24 | 244.94 | 307.7  | 234.19 | 119.9  |
| 6770 | 120.06 | 244.34 | 306.83 | 233.6  | 119.62 |
| 6772 | 119.87 | 243.65 | 305.97 | 233.03 | 119.36 |
| 6774 | 119.68 | 243.02 | 304.94 | 232.37 | 119.07 |
| 6776 | 119.5  | 242.43 | 304.08 | 231.79 | 118.77 |
| 6778 | 119.31 | 241.83 | 303.22 | 231.22 | 118.5  |
| 6780 | 119.07 | 241.21 | 302.35 | 230.62 | 118.21 |
| 6782 | 118.92 | 240.54 | 301.51 | 230.06 | 117.95 |
| 6784 | 118.76 | 239.96 | 300.54 | 229.44 | 117.66 |
| 6786 | 118.59 | 239.37 | 299.71 | 228.9  | 117.39 |
| 6788 | 118.4  | 238.7  | 298.88 | 228.34 | 117.13 |
| 6790 | 118.22 | 238.13 | 297.91 | 227.8  | 116.86 |
| 6792 | 118.05 | 237.53 | 297.09 | 227.14 | 116.54 |
| 6794 | 117.87 | 236.95 | 296.25 | 226.6  | 116.33 |
| 6796 | 117.68 | 236.36 | 295.42 | 226.05 | 116.01 |

|      |        |        |        |        |        |
|------|--------|--------|--------|--------|--------|
| 6798 | 117.52 | 235.72 | 294.63 | 225.52 | 115.78 |
| 6800 | 117.34 | 235.14 | 293.68 | 224.88 | 115.46 |
| 6802 | 117.17 | 234.58 | 292.87 | 224.34 | 115.22 |
| 6804 | 116.96 | 234.01 | 292.07 | 223.79 | 114.96 |
| 6806 | 116.8  | 233.35 | 291.14 | 223.26 | 114.71 |
| 6808 | 116.63 | 232.78 | 290.33 | 222.63 | 114.45 |
| 6810 | 116.45 | 232.2  | 289.53 | 222.07 | 114.13 |
| 6812 | 116.24 | 231.55 | 288.73 | 221.53 | 113.88 |
| 6814 | 116.09 | 231.01 | 287.83 | 220.93 | 113.63 |
| 6816 | 115.91 | 230.43 | 287.03 | 220.38 | 113.29 |
| 6818 | 115.75 | 229.88 | 286.24 | 219.85 | 113.05 |
| 6820 | 115.54 | 229.32 | 285.46 | 219.31 | 112.79 |
| 6822 | 115.4  | 228.7  | 284.59 | 218.82 | 112.58 |
| 6824 | 115.2  | 228.11 | 283.77 | 218.17 | 112.25 |
| 6826 | 115.03 | 227.56 | 283    | 217.66 | 112    |
| 6828 | 114.84 | 226.91 | 282.25 | 217.17 | 111.76 |
| 6830 | 114.67 | 226.38 | 281.35 | 216.65 | 111.5  |
| 6832 | 114.49 | 225.82 | 280.6  | 216.04 | 111.21 |
| 6834 | 114.34 | 225.29 | 279.85 | 215.53 | 110.98 |
| 6836 | 114.19 | 224.76 | 279.1  | 215.02 | 110.74 |
| 6838 | 114.03 | 224.17 | 278.37 | 214.53 | 110.51 |
| 6840 | 113.89 | 223.65 | 277.54 | 213.98 | 110.26 |
| 6842 | 113.73 | 223.11 | 276.8  | 213.47 | 110.02 |
| 6844 | 113.53 | 222.58 | 276.07 | 212.93 | 109.77 |
| 6846 | 113.34 | 222.05 | 275.3  | 212.41 | 109.52 |
| 6848 | 113.15 | 221.4  | 274.42 | 211.8  | 109.24 |
| 6850 | 112.99 | 220.87 | 273.69 | 211.28 | 109    |
| 6852 | 112.81 | 220.27 | 272.98 | 210.81 | 108.8  |
| 6854 | 112.69 | 219.77 | 272.17 | 210.26 | 108.59 |
| 6856 | 112.55 | 219.26 | 271.46 | 209.78 | 108.34 |
| 6858 | 112.39 | 218.75 | 270.73 | 209.29 | 108.11 |
| 6860 | 112.18 | 218.2  | 269.99 | 208.77 | 107.87 |
| 6862 | 112.03 | 217.6  | 269.27 | 208.29 | 107.63 |
| 6864 | 111.89 | 217.12 | 268.47 | 207.76 | 107.43 |
| 6866 | 111.72 | 216.6  | 267.76 | 207.27 | 107.19 |
| 6868 | 111.53 | 216.08 | 267.05 | 206.77 | 106.95 |
| 6870 | 111.39 | 215.51 | 266.26 | 206.3  | 106.77 |
| 6872 | 111.19 | 214.95 | 265.51 | 205.7  | 106.48 |
| 6874 | 111.05 | 214.47 | 264.85 | 205.24 | 106.29 |
| 6876 | 110.92 | 213.99 | 264.18 | 204.79 | 106.09 |
| 6878 | 110.72 | 213.4  | 263.49 | 204.3  | 105.87 |
| 6880 | 110.56 | 212.89 | 262.68 | 203.71 | 105.6  |
| 6882 | 110.39 | 212.38 | 262    | 203.25 | 105.39 |
| 6884 | 110.17 | 211.85 | 261.28 | 202.74 | 105.13 |

|      |        |        |        |        |        |
|------|--------|--------|--------|--------|--------|
| 6886 | 110.05 | 211.3  | 260.51 | 202.31 | 104.94 |
| 6888 | 109.86 | 210.77 | 259.81 | 201.72 | 104.64 |
| 6890 | 109.72 | 210.31 | 259.17 | 201.28 | 104.45 |
| 6892 | 109.57 | 209.83 | 258.49 | 200.82 | 104.25 |
| 6894 | 109.4  | 209.24 | 257.71 | 200.28 | 104.05 |
| 6896 | 109.25 | 208.76 | 257.04 | 199.81 | 103.8  |
| 6898 | 109.12 | 208.31 | 256.41 | 199.37 | 103.61 |
| 6900 | 108.93 | 207.76 | 255.75 | 198.9  | 103.41 |
| 6902 | 108.72 | 207.21 | 254.93 | 198.39 | 103.15 |
| 6904 | 108.62 | 206.78 | 254.33 | 197.9  | 102.96 |
| 6906 | 108.48 | 206.3  | 253.68 | 197.45 | 102.77 |
| 6908 | 108.32 | 205.82 | 253.02 | 196.99 | 102.57 |
| 6910 | 108.11 | 205.25 | 252.35 | 196.51 | 102.33 |
| 6912 | 107.98 | 204.79 | 251.62 | 195.99 | 102.11 |
| 6914 | 107.84 | 204.32 | 250.99 | 195.54 | 101.91 |
| 6916 | 107.66 | 203.85 | 250.35 | 195.09 | 101.71 |
| 6918 | 107.52 | 203.3  | 249.6  | 194.65 | 101.5  |
| 6920 | 107.36 | 202.83 | 248.96 | 194.13 | 101.26 |
| 6922 | 107.22 | 202.36 | 248.33 | 193.69 | 101.06 |
| 6924 | 107.1  | 201.92 | 247.73 | 193.27 | 100.87 |
| 6926 | 106.94 | 201.49 | 247.14 | 192.86 | 100.71 |
| 6928 | 106.77 | 200.91 | 246.36 | 192.31 | 100.44 |
| 6930 | 106.61 | 200.44 | 245.72 | 191.86 | 100.23 |
| 6932 | 106.45 | 199.99 | 245.13 | 191.45 | 100.06 |
| 6934 | 106.3  | 199.45 | 244.52 | 191    | 99.86  |
| 6936 | 106.14 | 198.95 | 243.77 | 190.47 | 99.64  |
| 6938 | 106    | 198.52 | 243.17 | 190.06 | 99.41  |
| 6940 | 105.81 | 198.04 | 242.54 | 189.62 | 99.19  |
| 6942 | 105.66 | 197.5  | 241.81 | 189.18 | 98.98  |
| 6944 | 105.51 | 197.06 | 241.2  | 188.67 | 98.75  |
| 6946 | 105.34 | 196.61 | 240.6  | 188.25 | 98.56  |
| 6948 | 105.19 | 196.16 | 240    | 187.83 | 98.36  |
| 6950 | 105.01 | 195.59 | 239.36 | 187.36 | 98.12  |
| 6952 | 104.88 | 195.16 | 238.67 | 186.86 | 97.94  |
| 6954 | 104.71 | 194.72 | 238.08 | 186.43 | 97.7   |
| 6956 | 104.54 | 194.2  | 237.47 | 186    | 97.49  |
| 6958 | 104.39 | 193.75 | 236.77 | 185.5  | 97.29  |
| 6960 | 104.25 | 193.32 | 236.2  | 185.08 | 97.06  |
| 6962 | 104.12 | 192.89 | 235.63 | 184.68 | 96.88  |
| 6964 | 104    | 192.48 | 235.05 | 184.28 | 96.7   |
| 6966 | 103.83 | 191.95 | 234.36 | 183.77 | 96.49  |
| 6968 | 103.71 | 191.53 | 233.8  | 183.38 | 96.3   |
| 6970 | 103.55 | 191.09 | 233.21 | 182.97 | 96.09  |
| 6972 | 103.39 | 190.66 | 232.64 | 182.57 | 95.9   |

|      |        |        |        |        |       |
|------|--------|--------|--------|--------|-------|
| 6974 | 103.25 | 190.17 | 231.97 | 182.16 | 95.7  |
| 6976 | 103.09 | 189.73 | 231.38 | 181.66 | 95.46 |
| 6978 | 102.94 | 189.28 | 230.8  | 181.24 | 95.27 |
| 6980 | 102.77 | 188.77 | 230.2  | 180.82 | 95.08 |
| 6982 | 102.66 | 188.38 | 229.59 | 180.37 | 94.93 |
| 6984 | 102.52 | 187.97 | 229.03 | 179.97 | 94.71 |
| 6986 | 102.39 | 187.55 | 228.48 | 179.57 | 94.54 |
| 6988 | 102.15 | 187.07 | 227.85 | 179.11 | 94.29 |
| 6990 | 102    | 186.56 | 227.27 | 178.7  | 94.08 |
| 6992 | 101.89 | 186.18 | 226.65 | 178.26 | 93.89 |
| 6994 | 101.75 | 185.74 | 226.09 | 177.85 | 93.7  |
| 6996 | 101.6  | 185.26 | 225.57 | 177.48 | 93.54 |
| 6998 | 101.48 | 184.86 | 224.93 | 177.09 | 93.36 |
| 7000 | 101.31 | 184.4  | 224.33 | 176.6  | 93.12 |
| 7002 | 101.17 | 184    | 223.79 | 176.21 | 92.95 |
| 7004 | 101.03 | 183.59 | 223.25 | 175.83 | 92.76 |
| 7006 | 100.88 | 183.12 | 222.62 | 175.38 | 92.58 |
| 7008 | 100.76 | 182.72 | 222.1  | 174.99 | 92.37 |
| 7010 | 100.61 | 182.31 | 221.55 | 174.59 | 92.17 |
| 7012 | 100.47 | 181.85 | 221.01 | 174.2  | 91.99 |
| 7014 | 100.34 | 181.45 | 220.4  | 173.78 | 91.84 |
| 7016 | 100.2  | 181.05 | 219.86 | 173.38 | 91.64 |
| 7018 | 100.06 | 180.63 | 219.31 | 172.98 | 91.44 |
| 7020 | 99.94  | 180.24 | 218.77 | 172.58 | 91.26 |
| 7022 | 99.77  | 179.78 | 218.27 | 172.2  | 91.09 |
| 7024 | 99.65  | 179.4  | 217.67 | 171.77 | 90.92 |
| 7026 | 99.52  | 179    | 217.15 | 171.4  | 90.75 |
| 7028 | 99.36  | 178.59 | 216.62 | 171.02 | 90.56 |
| 7030 | 99.24  | 178.15 | 216.03 | 170.65 | 90.39 |
| 7032 | 99.11  | 177.76 | 215.51 | 170.21 | 90.19 |
| 7034 | 98.97  | 177.36 | 214.99 | 169.83 | 90.01 |
| 7036 | 98.84  | 176.97 | 214.48 | 169.45 | 89.84 |
| 7038 | 98.69  | 176.52 | 213.88 | 169.02 | 89.66 |
| 7040 | 98.56  | 176.13 | 213.35 | 168.64 | 89.46 |
| 7042 | 98.43  | 175.75 | 212.85 | 168.26 | 89.29 |
| 7044 | 98.29  | 175.35 | 212.34 | 167.88 | 89.12 |
| 7046 | 98.14  | 174.9  | 211.82 | 167.51 | 88.95 |
| 7048 | 98.04  | 174.55 | 211.27 | 167.12 | 88.81 |
| 7050 | 97.88  | 174.15 | 210.73 | 166.72 | 88.58 |
| 7052 | 97.72  | 173.69 | 210.22 | 166.34 | 88.4  |
| 7054 | 97.58  | 173.31 | 209.64 | 165.97 | 88.23 |
| 7056 | 97.43  | 172.9  | 209.12 | 165.54 | 88.01 |
| 7058 | 97.3   | 172.51 | 208.63 | 165.16 | 87.83 |
| 7060 | 97.16  | 172.07 | 208.15 | 164.81 | 87.65 |



|      |       |        |        |        |       |
|------|-------|--------|--------|--------|-------|
| 7062 | 97.03 | 171.75 | 207.66 | 164.45 | 87.48 |
| 7064 | 96.92 | 171.33 | 207.1  | 164.04 | 87.3  |
| 7066 | 96.74 | 170.91 | 206.57 | 163.65 | 87.09 |
| 7068 | 96.6  | 170.49 | 206.1  | 163.3  | 86.93 |
| 7070 | 96.45 | 170.09 | 205.5  | 162.93 | 86.75 |
| 7072 | 96.32 | 169.72 | 205.02 | 162.5  | 86.55 |
| 7074 | 96.18 | 169.33 | 204.52 | 162.12 | 86.37 |
| 7076 | 96.04 | 168.91 | 204.04 | 161.78 | 86.21 |
| 7078 | 95.95 | 168.58 | 203.53 | 161.41 | 86.09 |
| 7080 | 95.82 | 168.2  | 203.04 | 161.04 | 85.89 |
| 7082 | 95.71 | 167.84 | 202.57 | 160.68 | 85.73 |
| 7084 | 95.53 | 167.44 | 202.06 | 160.3  | 85.55 |
| 7086 | 95.44 | 167.05 | 201.54 | 159.98 | 85.42 |
| 7088 | 95.32 | 166.7  | 201.08 | 159.61 | 85.28 |
| 7090 | 95.21 | 166.34 | 200.62 | 159.25 | 85.1  |
| 7092 | 95.06 | 165.91 | 200.15 | 158.9  | 84.94 |
| 7094 | 94.93 | 165.55 | 199.58 | 158.48 | 84.77 |
| 7096 | 94.75 | 165.14 | 199.05 | 158.09 | 84.52 |
| 7098 | 94.63 | 164.78 | 198.6  | 157.75 | 84.37 |
| 7100 | 94.49 | 164.42 | 198.13 | 157.39 | 84.2  |
| 7102 | 94.35 | 164.01 | 197.6  | 156.98 | 84.03 |
| 7104 | 94.21 | 163.64 | 197.12 | 156.63 | 83.84 |
| 7106 | 94.1  | 163.3  | 196.67 | 156.3  | 83.68 |
| 7108 | 93.97 | 162.96 | 196.22 | 155.96 | 83.52 |
| 7110 | 93.85 | 162.56 | 195.7  | 155.63 | 83.37 |
| 7112 | 93.72 | 162.19 | 195.23 | 155.25 | 83.18 |
| 7114 | 93.61 | 161.84 | 194.78 | 154.91 | 83.01 |
| 7116 | 93.48 | 161.44 | 194.34 | 154.6  | 82.88 |
| 7118 | 93.35 | 161.09 | 193.81 | 154.19 | 82.72 |
| 7120 | 93.23 | 160.74 | 193.38 | 153.87 | 82.54 |
| 7122 | 93.09 | 160.36 | 192.91 | 153.5  | 82.36 |
| 7124 | 92.95 | 160.01 | 192.45 | 153.16 | 82.19 |
| 7126 | 92.82 | 159.61 | 191.94 | 152.82 | 82.04 |
| 7128 | 92.7  | 159.26 | 191.5  | 152.43 | 81.88 |
| 7130 | 92.57 | 158.91 | 191.06 | 152.08 | 81.71 |
| 7132 | 92.43 | 158.56 | 190.61 | 151.75 | 81.56 |
| 7134 | 92.31 | 158.16 | 190.1  | 151.37 | 81.4  |
| 7136 | 92.17 | 157.8  | 189.66 | 151.03 | 81.21 |
| 7138 | 92.06 | 157.48 | 189.22 | 150.72 | 81.06 |
| 7140 | 91.92 | 157.07 | 188.78 | 150.39 | 80.9  |
| 7142 | 91.82 | 156.75 | 188.36 | 150.09 | 80.76 |
| 7144 | 91.71 | 156.42 | 187.87 | 149.73 | 80.62 |
| 7146 | 91.58 | 156.07 | 187.44 | 149.39 | 80.43 |
| 7148 | 91.45 | 155.69 | 187.01 | 149.06 | 80.28 |

|      |       |        |        |        |       |
|------|-------|--------|--------|--------|-------|
| 7150 | 91.31 | 155.34 | 186.5  | 148.7  | 80.14 |
| 7152 | 91.24 | 155.07 | 186.13 | 148.41 | 80    |
| 7154 | 91.15 | 154.76 | 185.72 | 148.09 | 79.87 |
| 7156 | 90.98 | 154.4  | 185.25 | 147.75 | 79.69 |
| 7158 | 90.88 | 154.03 | 184.77 | 147.44 | 79.57 |
| 7160 | 90.76 | 153.68 | 184.34 | 147.08 | 79.4  |
| 7162 | 90.64 | 153.33 | 183.91 | 146.75 | 79.23 |
| 7164 | 90.47 | 152.94 | 183.48 | 146.42 | 79.07 |
| 7166 | 90.36 | 152.61 | 182.99 | 146.05 | 78.93 |
| 7168 | 90.25 | 152.3  | 182.59 | 145.75 | 78.78 |
| 7170 | 90.13 | 151.96 | 182.15 | 145.41 | 78.6  |
| 7172 | 90    | 151.62 | 181.74 | 145.1  | 78.45 |
| 7174 | 89.85 | 151.22 | 181.24 | 144.71 | 78.3  |
| 7176 | 89.74 | 150.9  | 180.83 | 144.41 | 78.12 |
| 7178 | 89.64 | 150.59 | 180.43 | 144.11 | 77.99 |
| 7180 | 89.52 | 150.29 | 180.03 | 143.82 | 77.85 |
| 7182 | 89.4  | 149.92 | 179.56 | 143.5  | 77.71 |
| 7184 | 89.28 | 149.59 | 179.15 | 143.13 | 77.54 |
| 7186 | 89.17 | 149.27 | 178.75 | 142.81 | 77.39 |
| 7188 | 89.02 | 148.89 | 178.34 | 142.51 | 77.24 |
| 7190 | 88.93 | 148.58 | 177.87 | 142.18 | 77.1  |
| 7192 | 88.8  | 148.26 | 177.47 | 141.87 | 76.95 |
| 7194 | 88.71 | 147.97 | 177.1  | 141.59 | 76.8  |
| 7196 | 88.58 | 147.61 | 176.68 | 141.27 | 76.65 |
| 7198 | 88.47 | 147.3  | 176.23 | 140.92 | 76.51 |
| 7200 | 88.35 | 146.97 | 175.83 | 140.63 | 76.32 |
| 7202 | 88.24 | 146.67 | 175.43 | 140.32 | 76.18 |
| 7204 | 88.1  | 146.36 | 175.03 | 140.01 | 76.03 |
| 7206 | 88    | 145.99 | 174.58 | 139.67 | 75.89 |
| 7208 | 87.88 | 145.68 | 174.19 | 139.38 | 75.72 |
| 7210 | 87.77 | 145.37 | 173.81 | 139.09 | 75.58 |
| 7212 | 87.63 | 145.04 | 173.4  | 138.78 | 75.45 |
| 7214 | 87.52 | 144.71 | 172.97 | 138.49 | 75.31 |
| 7216 | 87.41 | 144.41 | 172.56 | 138.16 | 75.16 |
| 7218 | 87.32 | 144.12 | 172.19 | 137.89 | 75.05 |
| 7220 | 87.18 | 143.76 | 171.79 | 137.58 | 74.9  |
| 7222 | 87.07 | 143.45 | 171.33 | 137.23 | 74.76 |
| 7224 | 86.96 | 143.15 | 170.95 | 136.93 | 74.61 |
| 7226 | 86.81 | 142.82 | 170.53 | 136.62 | 74.46 |
| 7228 | 86.72 | 142.55 | 170.18 | 136.37 | 74.34 |
| 7230 | 86.61 | 142.2  | 169.73 | 136.08 | 74.21 |
| 7232 | 86.52 | 141.91 | 169.37 | 135.76 | 74.08 |
| 7234 | 86.4  | 141.61 | 168.97 | 135.45 | 73.92 |
| 7236 | 86.27 | 141.28 | 168.61 | 135.18 | 73.8  |

|      |       |        |        |        |       |
|------|-------|--------|--------|--------|-------|
| 7238 | 86.17 | 140.97 | 168.17 | 134.89 | 73.68 |
| 7240 | 86.06 | 140.68 | 167.8  | 134.56 | 73.53 |
| 7242 | 85.98 | 140.41 | 167.45 | 134.31 | 73.42 |
| 7244 | 85.88 | 140.12 | 167.08 | 134.04 | 73.31 |
| 7246 | 85.72 | 139.76 | 166.63 | 133.69 | 73.15 |
| 7248 | 85.63 | 139.48 | 166.27 | 133.41 | 73.01 |
| 7250 | 85.5  | 139.18 | 165.88 | 133.12 | 72.87 |
| 7252 | 85.4  | 138.88 | 165.5  | 132.83 | 72.74 |
| 7254 | 85.25 | 138.54 | 165.06 | 132.54 | 72.62 |
| 7256 | 85.15 | 138.24 | 164.69 | 132.2  | 72.46 |
| 7258 | 85.07 | 137.99 | 164.35 | 131.95 | 72.36 |
| 7260 | 84.94 | 137.68 | 163.96 | 131.65 | 72.21 |
| 7262 | 84.84 | 137.36 | 163.62 | 131.4  | 72.1  |
| 7264 | 84.7  | 137.05 | 163.17 | 131.05 | 71.94 |
| 7266 | 84.63 | 136.8  | 162.86 | 130.82 | 71.84 |
| 7268 | 84.5  | 136.52 | 162.5  | 130.55 | 71.73 |
| 7270 | 84.4  | 136.19 | 162.14 | 130.28 | 71.6  |
| 7272 | 84.29 | 135.91 | 161.72 | 129.97 | 71.48 |
| 7274 | 84.19 | 135.64 | 161.36 | 129.69 | 71.34 |
| 7276 | 84.08 | 135.31 | 161.03 | 129.43 | 71.23 |
| 7278 | 83.98 | 135.03 | 160.6  | 129.15 | 71.11 |
| 7280 | 83.87 | 134.75 | 160.24 | 128.85 | 70.97 |
| 7282 | 83.76 | 134.47 | 159.88 | 128.57 | 70.84 |
| 7284 | 83.66 | 134.2  | 159.52 | 128.3  | 70.7  |
| 7286 | 83.55 | 133.89 | 159.18 | 128.06 | 70.61 |
| 7288 | 83.47 | 133.66 | 158.79 | 127.77 | 70.5  |
| 7290 | 83.38 | 133.38 | 158.45 | 127.52 | 70.37 |
| 7292 | 83.25 | 133.08 | 158.07 | 127.22 | 70.22 |
| 7294 | 83.15 | 132.78 | 157.69 | 126.98 | 70.11 |
| 7296 | 83.05 | 132.51 | 157.34 | 126.69 | 69.98 |
| 7298 | 82.92 | 132.2  | 156.95 | 126.4  | 69.85 |
| 7300 | 82.81 | 131.89 | 156.61 | 126.13 | 69.72 |
| 7302 | 82.7  | 131.68 | 156.28 | 125.89 | 69.62 |
| 7304 | 82.62 | 131.37 | 155.89 | 125.59 | 69.47 |
| 7306 | 82.51 | 131.11 | 155.56 | 125.33 | 69.36 |
| 7308 | 82.37 | 130.84 | 155.22 | 125.08 | 69.23 |
| 7310 | 82.28 | 130.55 | 154.88 | 124.82 | 69.12 |
| 7312 | 82.18 | 130.28 | 154.48 | 124.5  | 69    |
| 7314 | 82.11 | 130.04 | 154.17 | 124.28 | 68.89 |
| 7316 | 81.96 | 129.76 | 153.82 | 124    | 68.75 |
| 7318 | 81.87 | 129.43 | 153.42 | 123.75 | 68.64 |
| 7320 | 81.75 | 129.14 | 153.06 | 123.44 | 68.48 |
| 7322 | 81.65 | 128.88 | 152.72 | 123.18 | 68.36 |
| 7324 | 81.57 | 128.62 | 152.42 | 122.97 | 68.29 |

|      |       |        |        |        |       |
|------|-------|--------|--------|--------|-------|
| 7326 | 81.46 | 128.34 | 152    | 122.65 | 68.14 |
| 7328 | 81.4  | 128.12 | 151.71 | 122.45 | 68.06 |
| 7330 | 81.3  | 127.85 | 151.36 | 122.18 | 67.91 |
| 7332 | 81.14 | 127.56 | 151    | 121.9  | 67.77 |
| 7334 | 81.02 | 127.24 | 150.67 | 121.65 | 67.66 |
| 7336 | 80.93 | 127    | 150.29 | 121.36 | 67.52 |
| 7338 | 80.81 | 126.73 | 149.94 | 121.09 | 67.4  |
| 7340 | 80.72 | 126.45 | 149.63 | 120.86 | 67.29 |
| 7342 | 80.62 | 126.2  | 149.26 | 120.62 | 67.19 |
| 7344 | 80.52 | 125.95 | 148.93 | 120.33 | 67.05 |
| 7346 | 80.43 | 125.7  | 148.61 | 120.08 | 66.94 |
| 7348 | 80.32 | 125.41 | 148.28 | 119.84 | 66.82 |
| 7350 | 80.21 | 125.16 | 147.89 | 119.56 | 66.71 |
| 7352 | 80.1  | 124.89 | 147.57 | 119.31 | 66.57 |
| 7354 | 80.08 | 124.72 | 147.34 | 119.13 | 66.54 |
| 7356 | 79.98 | 124.47 | 147.03 | 118.9  | 66.44 |
| 7358 | 79.88 | 124.18 | 146.65 | 118.67 | 66.33 |
| 7360 | 79.79 | 123.92 | 146.33 | 118.38 | 66.21 |
| 7362 | 79.69 | 123.68 | 146.02 | 118.15 | 66.1  |
| 7364 | 79.58 | 123.39 | 145.7  | 117.91 | 65.99 |
| 7366 | 79.49 | 123.15 | 145.33 | 117.63 | 65.88 |
| 7368 | 79.4  | 122.9  | 145.02 | 117.39 | 65.76 |
| 7370 | 79.3  | 122.67 | 144.71 | 117.16 | 65.65 |
| 7372 | 79.19 | 122.42 | 144.41 | 116.93 | 65.55 |
| 7374 | 79.1  | 122.14 | 144.1  | 116.69 | 65.44 |
| 7376 | 78.98 | 121.87 | 143.71 | 116.39 | 65.29 |
| 7378 | 78.87 | 121.63 | 143.4  | 116.15 | 65.16 |
| 7380 | 78.74 | 121.34 | 143.06 | 115.9  | 65.03 |
| 7382 | 78.7  | 121.14 | 142.75 | 115.71 | 64.96 |
| 7384 | 78.59 | 120.9  | 142.45 | 115.44 | 64.83 |
| 7386 | 78.49 | 120.65 | 142.13 | 115.21 | 64.74 |
| 7388 | 78.37 | 120.39 | 141.8  | 114.95 | 64.6  |
| 7390 | 78.3  | 120.15 | 141.48 | 114.7  | 64.52 |
| 7392 | 78.23 | 119.93 | 141.19 | 114.5  | 64.42 |
| 7394 | 78.11 | 119.68 | 140.88 | 114.26 | 64.29 |
| 7396 | 78    | 119.45 | 140.58 | 114.04 | 64.19 |
| 7398 | 77.92 | 119.18 | 140.21 | 113.81 | 64.09 |
| 7400 | 77.84 | 118.95 | 139.92 | 113.55 | 63.98 |
| 7402 | 77.75 | 118.72 | 139.64 | 113.34 | 63.86 |
| 7404 | 77.63 | 118.46 | 139.32 | 113.08 | 63.73 |
| 7406 | 77.52 | 118.2  | 138.97 | 112.82 | 63.61 |
| 7408 | 77.41 | 117.94 | 138.66 | 112.58 | 63.47 |
| 7410 | 77.34 | 117.73 | 138.37 | 112.38 | 63.38 |
| 7412 | 77.24 | 117.49 | 138.08 | 112.16 | 63.27 |

|      |       |        |        |        |       |
|------|-------|--------|--------|--------|-------|
| 7414 | 77.13 | 117.22 | 137.79 | 111.93 | 63.16 |
| 7416 | 77.05 | 116.99 | 137.44 | 111.68 | 63.05 |
| 7418 | 76.97 | 116.77 | 137.15 | 111.46 | 62.95 |
| 7420 | 76.85 | 116.54 | 136.86 | 111.23 | 62.84 |
| 7422 | 76.78 | 116.3  | 136.54 | 111.02 | 62.75 |
| 7424 | 76.67 | 116.06 | 136.24 | 110.75 | 62.63 |
| 7426 | 76.58 | 115.83 | 135.95 | 110.53 | 62.54 |
| 7428 | 76.52 | 115.63 | 135.69 | 110.34 | 62.46 |
| 7430 | 76.41 | 115.38 | 135.41 | 110.13 | 62.38 |
| 7432 | 76.33 | 115.15 | 135.06 | 109.91 | 62.28 |
| 7434 | 76.27 | 114.96 | 134.8  | 109.69 | 62.18 |
| 7436 | 76.18 | 114.75 | 134.53 | 109.49 | 62.09 |
| 7438 | 76.05 | 114.43 | 134.15 | 109.22 | 61.94 |
| 7440 | 75.98 | 114.23 | 133.89 | 108.99 | 61.84 |
| 7442 | 75.92 | 114.04 | 133.64 | 108.8  | 61.76 |
| 7444 | 75.79 | 113.74 | 133.33 | 108.55 | 61.64 |
| 7446 | 75.68 | 113.52 | 132.99 | 108.29 | 61.52 |
| 7448 | 75.6  | 113.31 | 132.71 | 108.1  | 61.42 |
| 7450 | 75.5  | 113.08 | 132.42 | 107.87 | 61.3  |
| 7452 | 75.41 | 112.87 | 132.15 | 107.66 | 61.21 |
| 7454 | 75.31 | 112.63 | 131.87 | 107.45 | 61.11 |
| 7456 | 75.22 | 112.42 | 131.55 | 107.21 | 61    |
| 7458 | 75.15 | 112.21 | 131.28 | 107.01 | 60.9  |
| 7460 | 75.01 | 111.98 | 130.98 | 106.77 | 60.78 |
| 7462 | 74.9  | 111.7  | 130.65 | 106.55 | 60.67 |
| 7464 | 74.84 | 111.51 | 130.4  | 106.31 | 60.57 |
| 7466 | 74.75 | 111.29 | 130.11 | 106.1  | 60.47 |
| 7468 | 74.69 | 111.08 | 129.88 | 105.93 | 60.41 |
| 7470 | 74.6  | 110.86 | 129.6  | 105.74 | 60.33 |
| 7472 | 74.51 | 110.64 | 129.27 | 105.49 | 60.18 |
| 7474 | 74.42 | 110.43 | 128.99 | 105.26 | 60.08 |
| 7476 | 74.34 | 110.24 | 128.75 | 105.09 | 60.02 |
| 7478 | 74.28 | 110.01 | 128.5  | 104.9  | 59.94 |
| 7480 | 74.19 | 109.81 | 128.19 | 104.67 | 59.85 |
| 7482 | 74.12 | 109.6  | 127.93 | 104.47 | 59.74 |
| 7484 | 74.02 | 109.4  | 127.68 | 104.27 | 59.64 |
| 7486 | 73.94 | 109.16 | 127.37 | 104.07 | 59.55 |
| 7488 | 73.86 | 108.94 | 127.1  | 103.83 | 59.43 |
| 7490 | 73.75 | 108.72 | 126.81 | 103.62 | 59.33 |
| 7492 | 73.66 | 108.5  | 126.58 | 103.44 | 59.26 |
| 7494 | 73.58 | 108.3  | 126.28 | 103.22 | 59.17 |
| 7496 | 73.51 | 108.11 | 126.03 | 103.03 | 59.07 |
| 7498 | 73.42 | 107.9  | 125.77 | 102.83 | 58.98 |
| 7500 | 73.34 | 107.71 | 125.52 | 102.64 | 58.89 |

|      |       |        |        |        |       |
|------|-------|--------|--------|--------|-------|
| 7502 | 73.25 | 107.48 | 125.22 | 102.41 | 58.8  |
| 7504 | 73.17 | 107.28 | 124.96 | 102.21 | 58.69 |
| 7506 | 73.08 | 107.09 | 124.7  | 102.01 | 58.61 |
| 7508 | 72.99 | 106.89 | 124.45 | 101.82 | 58.52 |
| 7510 | 72.93 | 106.68 | 124.21 | 101.65 | 58.43 |
| 7512 | 72.83 | 106.46 | 123.89 | 101.4  | 58.32 |
| 7514 | 72.75 | 106.27 | 123.64 | 101.2  | 58.23 |
| 7516 | 72.66 | 106.04 | 123.38 | 101.01 | 58.15 |
| 7518 | 72.58 | 105.85 | 123.1  | 100.83 | 58.07 |
| 7520 | 72.49 | 105.65 | 122.85 | 100.61 | 57.96 |
| 7522 | 72.41 | 105.44 | 122.59 | 100.4  | 57.86 |
| 7524 | 72.34 | 105.26 | 122.35 | 100.23 | 57.79 |
| 7526 | 72.25 | 105.03 | 122.11 | 100.05 | 57.71 |
| 7528 | 72.16 | 104.83 | 121.81 | 99.82  | 57.61 |
| 7530 | 72.05 | 104.6  | 121.52 | 99.59  | 57.48 |
| 7532 | 71.96 | 104.42 | 121.29 | 99.42  | 57.4  |
| 7534 | 71.91 | 104.22 | 121.04 | 99.26  | 57.35 |
| 7536 | 71.82 | 104.03 | 120.79 | 99.04  | 57.25 |
| 7538 | 71.74 | 103.82 | 120.53 | 98.85  | 57.15 |
| 7540 | 71.63 | 103.59 | 120.28 | 98.64  | 57.05 |
| 7542 | 71.53 | 103.39 | 119.97 | 98.4   | 56.95 |
| 7544 | 71.45 | 103.2  | 119.74 | 98.23  | 56.84 |
| 7546 | 71.41 | 103.06 | 119.54 | 98.08  | 56.78 |
| 7548 | 71.32 | 102.87 | 119.29 | 97.88  | 56.69 |
| 7550 | 71.26 | 102.66 | 119.02 | 97.68  | 56.62 |
| 7552 | 71.18 | 102.47 | 118.79 | 97.51  | 56.53 |
| 7554 | 71.1  | 102.3  | 118.55 | 97.34  | 56.45 |
| 7556 | 71.01 | 102.07 | 118.32 | 97.15  | 56.37 |
| 7558 | 70.92 | 101.87 | 118.03 | 96.92  | 56.26 |
| 7560 | 70.86 | 101.7  | 117.81 | 96.76  | 56.18 |
| 7562 | 70.76 | 101.49 | 117.55 | 96.56  | 56.08 |
| 7564 | 70.68 | 101.33 | 117.33 | 96.4   | 56.01 |
| 7566 | 70.59 | 101.08 | 117.03 | 96.2   | 55.9  |
| 7568 | 70.5  | 100.88 | 116.77 | 96     | 55.8  |
| 7570 | 70.41 | 100.7  | 116.53 | 95.77  | 55.68 |
| 7572 | 70.35 | 100.52 | 116.33 | 95.63  | 55.64 |
| 7574 | 70.3  | 100.37 | 116.09 | 95.44  | 55.58 |
| 7576 | 70.22 | 100.19 | 115.86 | 95.27  | 55.51 |
| 7578 | 70.15 | 100.01 | 115.63 | 95.1   | 55.41 |
| 7580 | 70.08 | 99.83  | 115.4  | 94.92  | 55.34 |
| 7582 | 69.99 | 99.62  | 115.13 | 94.72  | 55.25 |
| 7584 | 69.91 | 99.44  | 114.91 | 94.54  | 55.15 |
| 7586 | 69.84 | 99.26  | 114.68 | 94.37  | 55.08 |
| 7588 | 69.73 | 99.09  | 114.46 | 94.2   | 54.99 |

|      |       |       |        |       |       |
|------|-------|-------|--------|-------|-------|
| 7590 | 69.65 | 98.86 | 114.22 | 94.02 | 54.91 |
| 7592 | 69.58 | 98.7  | 113.96 | 93.82 | 54.81 |
| 7594 | 69.5  | 98.52 | 113.72 | 93.64 | 54.73 |
| 7596 | 69.43 | 98.36 | 113.52 | 93.49 | 54.67 |
| 7598 | 69.37 | 98.17 | 113.25 | 93.33 | 54.6  |
| 7600 | 69.26 | 97.97 | 113    | 93.1  | 54.48 |
| 7602 | 69.17 | 97.77 | 112.77 | 92.92 | 54.38 |
| 7604 | 69.07 | 97.56 | 112.55 | 92.73 | 54.3  |
| 7606 | 68.99 | 97.38 | 112.3  | 92.53 | 54.22 |
| 7608 | 68.93 | 97.22 | 112.1  | 92.38 | 54.15 |
| 7610 | 68.87 | 97.06 | 111.88 | 92.22 | 54.1  |
| 7612 | 68.8  | 96.9  | 111.68 | 92.06 | 54.01 |
| 7614 | 68.7  | 96.68 | 111.45 | 91.86 | 53.91 |
| 7616 | 68.62 | 96.5  | 111.17 | 91.66 | 53.81 |
| 7618 | 68.54 | 96.33 | 110.95 | 91.51 | 53.73 |
| 7620 | 68.46 | 96.12 | 110.74 | 91.34 | 53.66 |
| 7622 | 68.4  | 95.97 | 110.5  | 91.19 | 53.59 |
| 7624 | 68.37 | 95.84 | 110.32 | 91.04 | 53.55 |
| 7626 | 68.3  | 95.68 | 110.1  | 90.86 | 53.47 |
| 7628 | 68.22 | 95.49 | 109.9  | 90.7  | 53.41 |
| 7630 | 68.14 | 95.32 | 109.64 | 90.5  | 53.32 |
| 7632 | 68.07 | 95.16 | 109.43 | 90.33 | 53.24 |
| 7634 | 67.99 | 94.99 | 109.22 | 90.18 | 53.16 |
| 7636 | 67.93 | 94.83 | 109.01 | 90.01 | 53.1  |
| 7638 | 67.85 | 94.64 | 108.8  | 89.86 | 53.03 |
| 7640 | 67.79 | 94.48 | 108.56 | 89.67 | 52.94 |
| 7642 | 67.72 | 94.31 | 108.36 | 89.52 | 52.87 |
| 7644 | 67.62 | 94.14 | 108.12 | 89.35 | 52.77 |
| 7646 | 67.54 | 93.93 | 107.87 | 89.19 | 52.69 |
| 7648 | 67.48 | 93.78 | 107.69 | 89.02 | 52.63 |
| 7650 | 67.41 | 93.64 | 107.5  | 88.87 | 52.55 |
| 7652 | 67.32 | 93.43 | 107.27 | 88.69 | 52.47 |
| 7654 | 67.26 | 93.31 | 107.08 | 88.54 | 52.41 |
| 7656 | 67.18 | 93.13 | 106.85 | 88.35 | 52.33 |
| 7658 | 67.11 | 92.97 | 106.64 | 88.19 | 52.25 |
| 7660 | 67.04 | 92.78 | 106.44 | 88.03 | 52.18 |
| 7662 | 66.96 | 92.62 | 106.2  | 87.85 | 52.11 |
| 7664 | 66.87 | 92.44 | 105.98 | 87.68 | 52.02 |
| 7666 | 66.77 | 92.25 | 105.75 | 87.49 | 51.91 |
| 7668 | 66.71 | 92.1  | 105.55 | 87.36 | 51.86 |
| 7670 | 66.64 | 91.93 | 105.32 | 87.22 | 51.8  |
| 7672 | 66.56 | 91.75 | 105.12 | 87.03 | 51.72 |
| 7674 | 66.52 | 91.62 | 104.93 | 86.89 | 51.65 |
| 7676 | 66.42 | 91.47 | 104.73 | 86.73 | 51.58 |

|      |       |       |        |       |       |
|------|-------|-------|--------|-------|-------|
| 7678 | 66.33 | 91.26 | 104.47 | 86.53 | 51.49 |
| 7680 | 66.3  | 91.14 | 104.3  | 86.41 | 51.44 |
| 7682 | 66.23 | 90.98 | 104.09 | 86.25 | 51.36 |
| 7684 | 66.12 | 90.79 | 103.86 | 86.05 | 51.28 |
| 7686 | 66.06 | 90.62 | 103.66 | 85.89 | 51.23 |
| 7688 | 66    | 90.46 | 103.45 | 85.73 | 51.14 |
| 7690 | 65.96 | 90.34 | 103.3  | 85.62 | 51.1  |
| 7692 | 65.89 | 90.17 | 103.12 | 85.48 | 51.04 |
| 7694 | 65.8  | 90    | 102.92 | 85.31 | 50.95 |
| 7696 | 65.73 | 89.84 | 102.68 | 85.14 | 50.87 |
| 7698 | 65.66 | 89.71 | 102.5  | 85    | 50.79 |
| 7700 | 65.55 | 89.5  | 102.27 | 84.82 | 50.69 |
| 7702 | 65.5  | 89.37 | 102.05 | 84.69 | 50.64 |
| 7704 | 65.44 | 89.22 | 101.86 | 84.51 | 50.55 |
| 7706 | 65.4  | 89.1  | 101.7  | 84.4  | 50.51 |
| 7708 | 65.29 | 88.9  | 101.47 | 84.2  | 50.4  |
| 7710 | 65.24 | 88.76 | 101.27 | 84.06 | 50.35 |
| 7712 | 65.14 | 88.58 | 101.06 | 83.89 | 50.26 |
| 7714 | 65.07 | 88.42 | 100.86 | 83.74 | 50.17 |
| 7716 | 65.01 | 88.29 | 100.69 | 83.63 | 50.14 |
| 7718 | 64.93 | 88.1  | 100.45 | 83.46 | 50.05 |
| 7720 | 64.84 | 87.93 | 100.26 | 83.27 | 49.95 |
| 7722 | 64.8  | 87.8  | 100.08 | 83.14 | 49.89 |
| 7724 | 64.71 | 87.63 | 99.9   | 83    | 49.84 |
| 7726 | 64.67 | 87.5  | 99.7   | 82.85 | 49.78 |
| 7728 | 64.61 | 87.37 | 99.53  | 82.71 | 49.73 |
| 7730 | 64.54 | 87.23 | 99.33  | 82.54 | 49.66 |
| 7732 | 64.47 | 87.06 | 99.14  | 82.41 | 49.59 |
| 7734 | 64.39 | 86.91 | 98.93  | 82.24 | 49.52 |
| 7736 | 64.33 | 86.75 | 98.75  | 82.09 | 49.45 |
| 7738 | 64.27 | 86.62 | 98.57  | 81.95 | 49.37 |
| 7740 | 64.16 | 86.43 | 98.36  | 81.78 | 49.27 |
| 7742 | 64.09 | 86.26 | 98.14  | 81.64 | 49.2  |
| 7744 | 64.03 | 86.12 | 97.95  | 81.46 | 49.12 |
| 7746 | 63.94 | 85.95 | 97.75  | 81.3  | 49.03 |
| 7748 | 63.89 | 85.8  | 97.6   | 81.2  | 49.01 |
| 7750 | 63.79 | 85.64 | 97.36  | 81.04 | 48.91 |
| 7752 | 63.76 | 85.53 | 97.21  | 80.91 | 48.86 |
| 7754 | 63.71 | 85.4  | 97.03  | 80.77 | 48.8  |
| 7756 | 63.63 | 85.24 | 96.85  | 80.63 | 48.74 |
| 7758 | 63.56 | 85.1  | 96.64  | 80.49 | 48.68 |
| 7760 | 63.5  | 84.96 | 96.46  | 80.33 | 48.6  |
| 7762 | 63.45 | 84.82 | 96.3   | 80.19 | 48.55 |
| 7764 | 63.4  | 84.7  | 96.12  | 80.06 | 48.5  |



|      |       |       |       |       |       |
|------|-------|-------|-------|-------|-------|
| 7766 | 63.29 | 84.52 | 95.9  | 79.88 | 48.42 |
| 7768 | 63.22 | 84.37 | 95.72 | 79.74 | 48.34 |
| 7770 | 63.16 | 84.23 | 95.55 | 79.61 | 48.28 |
| 7772 | 63.06 | 84.07 | 95.35 | 79.45 | 48.19 |
| 7774 | 63.01 | 83.92 | 95.17 | 79.3  | 48.14 |
| 7776 | 62.94 | 83.79 | 95    | 79.17 | 48.06 |
| 7778 | 62.87 | 83.63 | 94.81 | 79.02 | 48    |
| 7780 | 62.83 | 83.52 | 94.65 | 78.92 | 47.95 |
| 7782 | 62.78 | 83.38 | 94.49 | 78.8  | 47.9  |
| 7784 | 62.71 | 83.22 | 94.28 | 78.64 | 47.83 |
| 7786 | 62.65 | 83.09 | 94.1  | 78.49 | 47.75 |
| 7788 | 62.59 | 82.97 | 93.94 | 78.38 | 47.71 |
| 7790 | 62.5  | 82.8  | 93.73 | 78.25 | 47.66 |
| 7792 | 62.45 | 82.67 | 93.57 | 78.08 | 47.59 |
| 7794 | 62.37 | 82.51 | 93.38 | 77.93 | 47.51 |
| 7796 | 62.29 | 82.34 | 93.22 | 77.8  | 47.44 |
| 7798 | 62.24 | 82.23 | 93.03 | 77.68 | 47.4  |
| 7800 | 62.2  | 82.12 | 92.89 | 77.54 | 47.35 |
| 7802 | 62.14 | 81.99 | 92.72 | 77.41 | 47.29 |
| 7804 | 62.06 | 81.82 | 92.53 | 77.28 | 47.23 |
| 7806 | 62.01 | 81.7  | 92.35 | 77.13 | 47.18 |
| 7808 | 61.95 | 81.58 | 92.18 | 77    | 47.11 |
| 7810 | 61.91 | 81.46 | 92.05 | 76.91 | 47.08 |
| 7812 | 61.84 | 81.32 | 91.87 | 76.77 | 47.01 |
| 7814 | 61.76 | 81.17 | 91.7  | 76.63 | 46.94 |
| 7816 | 61.7  | 81.04 | 91.52 | 76.49 | 46.89 |
| 7818 | 61.66 | 80.94 | 91.37 | 76.38 | 46.84 |
| 7820 | 61.59 | 80.79 | 91.2  | 76.24 | 46.76 |
| 7822 | 61.51 | 80.63 | 91.01 | 76.11 | 46.7  |
| 7824 | 61.44 | 80.5  | 90.83 | 75.96 | 46.62 |
| 7826 | 61.37 | 80.37 | 90.67 | 75.83 | 46.56 |
| 7828 | 61.3  | 80.22 | 90.51 | 75.7  | 46.51 |
| 7830 | 61.24 | 80.09 | 90.31 | 75.58 | 46.45 |
| 7832 | 61.18 | 79.96 | 90.15 | 75.43 | 46.39 |
| 7834 | 61.15 | 79.87 | 90.01 | 75.32 | 46.34 |
| 7836 | 61.07 | 79.72 | 89.84 | 75.18 | 46.26 |
| 7838 | 61    | 79.58 | 89.66 | 75.05 | 46.2  |
| 7840 | 60.96 | 79.47 | 89.53 | 74.94 | 46.18 |
| 7842 | 60.9  | 79.35 | 89.37 | 74.82 | 46.11 |
| 7844 | 60.8  | 79.17 | 89.19 | 74.67 | 46.02 |
| 7846 | 60.74 | 79.05 | 88.99 | 74.52 | 45.96 |
| 7848 | 60.68 | 78.92 | 88.84 | 74.4  | 45.89 |
| 7850 | 60.63 | 78.8  | 88.68 | 74.28 | 45.83 |
| 7852 | 60.56 | 78.67 | 88.52 | 74.16 | 45.78 |

|      |       |       |       |       |       |
|------|-------|-------|-------|-------|-------|
| 7854 | 60.48 | 78.51 | 88.32 | 74.02 | 45.72 |
| 7856 | 60.44 | 78.4  | 88.18 | 73.9  | 45.66 |
| 7858 | 60.38 | 78.27 | 88.01 | 73.76 | 45.59 |
| 7860 | 60.32 | 78.14 | 87.88 | 73.65 | 45.55 |
| 7862 | 60.25 | 77.99 | 87.68 | 73.52 | 45.49 |
| 7864 | 60.2  | 77.88 | 87.51 | 73.36 | 45.42 |
| 7866 | 60.15 | 77.77 | 87.4  | 73.27 | 45.37 |
| 7868 | 60.07 | 77.62 | 87.24 | 73.16 | 45.3  |
| 7870 | 60.01 | 77.48 | 87.03 | 73    | 45.22 |
| 7872 | 59.96 | 77.37 | 86.89 | 72.88 | 45.17 |
| 7874 | 59.93 | 77.28 | 86.77 | 72.79 | 45.14 |
| 7876 | 59.87 | 77.16 | 86.61 | 72.66 | 45.08 |
| 7878 | 59.78 | 77.01 | 86.42 | 72.52 | 45.02 |
| 7880 | 59.74 | 76.9  | 86.29 | 72.42 | 44.97 |
| 7882 | 59.69 | 76.79 | 86.14 | 72.3  | 44.92 |
| 7884 | 59.6  | 76.65 | 85.96 | 72.17 | 44.86 |
| 7886 | 59.55 | 76.53 | 85.81 | 72.04 | 44.82 |
| 7888 | 59.48 | 76.4  | 85.64 | 71.9  | 44.72 |
| 7890 | 59.44 | 76.29 | 85.51 | 71.81 | 44.69 |
| 7892 | 59.38 | 76.18 | 85.38 | 71.7  | 44.65 |
| 7894 | 59.28 | 76.01 | 85.2  | 71.55 | 44.56 |
| 7896 | 59.24 | 75.92 | 85.04 | 71.43 | 44.51 |
| 7898 | 59.21 | 75.82 | 84.91 | 71.33 | 44.48 |
| 7900 | 59.15 | 75.7  | 84.76 | 71.21 | 44.43 |
| 7902 | 59.09 | 75.56 | 84.59 | 71.1  | 44.38 |
| 7904 | 59.04 | 75.45 | 84.45 | 70.98 | 44.32 |
| 7906 | 58.95 | 75.3  | 84.26 | 70.84 | 44.23 |
| 7908 | 58.91 | 75.2  | 84.14 | 70.74 | 44.2  |
| 7910 | 58.85 | 75.08 | 83.98 | 70.62 | 44.14 |
| 7912 | 58.79 | 74.96 | 83.83 | 70.51 | 44.09 |
| 7914 | 58.74 | 74.86 | 83.7  | 70.39 | 44.05 |
| 7916 | 58.67 | 74.75 | 83.56 | 70.28 | 44    |
| 7918 | 58.62 | 74.62 | 83.4  | 70.17 | 43.95 |
| 7920 | 58.57 | 74.5  | 83.26 | 70.05 | 43.89 |
| 7922 | 58.51 | 74.39 | 83.12 | 69.94 | 43.84 |
| 7924 | 58.46 | 74.28 | 82.98 | 69.82 | 43.79 |
| 7926 | 58.4  | 74.16 | 82.85 | 69.73 | 43.76 |
| 7928 | 58.32 | 74.04 | 82.66 | 69.58 | 43.68 |
| 7930 | 58.29 | 73.93 | 82.53 | 69.48 | 43.63 |
| 7932 | 58.22 | 73.83 | 82.39 | 69.36 | 43.57 |
| 7934 | 58.15 | 73.67 | 82.2  | 69.24 | 43.51 |
| 7936 | 58.09 | 73.55 | 82.06 | 69.12 | 43.46 |
| 7938 | 58.06 | 73.46 | 81.94 | 69.03 | 43.43 |
| 7940 | 57.98 | 73.34 | 81.78 | 68.9  | 43.35 |

|      |       |       |       |       |       |
|------|-------|-------|-------|-------|-------|
| 7942 | 57.95 | 73.22 | 81.64 | 68.81 | 43.32 |
| 7944 | 57.87 | 73.09 | 81.49 | 68.67 | 43.27 |
| 7946 | 57.81 | 72.98 | 81.36 | 68.56 | 43.2  |
| 7948 | 57.77 | 72.88 | 81.24 | 68.47 | 43.18 |
| 7950 | 57.7  | 72.75 | 81.06 | 68.35 | 43.12 |
| 7952 | 57.65 | 72.64 | 80.93 | 68.22 | 43.05 |
| 7954 | 57.59 | 72.52 | 80.79 | 68.11 | 42.99 |
| 7956 | 57.55 | 72.42 | 80.67 | 68.01 | 42.95 |
| 7958 | 57.51 | 72.33 | 80.52 | 67.89 | 42.92 |
| 7960 | 57.46 | 72.22 | 80.39 | 67.8  | 42.86 |
| 7962 | 57.39 | 72.12 | 80.25 | 67.7  | 42.81 |
| 7964 | 57.34 | 72.01 | 80.09 | 67.58 | 42.74 |
| 7966 | 57.29 | 71.89 | 79.96 | 67.47 | 42.7  |
| 7968 | 57.24 | 71.78 | 79.82 | 67.36 | 42.65 |
| 7970 | 57.17 | 71.66 | 79.67 | 67.25 | 42.6  |
| 7972 | 57.1  | 71.54 | 79.54 | 67.14 | 42.55 |
| 7974 | 57.07 | 71.43 | 79.42 | 67.05 | 42.5  |
| 7976 | 57.02 | 71.34 | 79.27 | 66.94 | 42.46 |
| 7978 | 56.95 | 71.21 | 79.13 | 66.81 | 42.38 |
| 7980 | 56.88 | 71.11 | 79    | 66.71 | 42.35 |
| 7982 | 56.82 | 70.97 | 78.82 | 66.59 | 42.29 |
| 7984 | 56.76 | 70.85 | 78.68 | 66.44 | 42.22 |
| 7986 | 56.71 | 70.76 | 78.57 | 66.37 | 42.2  |
| 7988 | 56.66 | 70.65 | 78.44 | 66.27 | 42.16 |
| 7990 | 56.64 | 70.57 | 78.31 | 66.19 | 42.13 |
| 7992 | 56.56 | 70.46 | 78.18 | 66.07 | 42.06 |
| 7994 | 56.49 | 70.34 | 78.01 | 65.94 | 41.98 |
| 7996 | 56.41 | 70.19 | 77.86 | 65.82 | 41.93 |
| 7998 | 56.38 | 70.12 | 77.75 | 65.73 | 41.89 |
| 8000 | 56.37 | 70.05 | 77.65 | 65.65 | 41.88 |
| 8002 | 56.3  | 69.93 | 77.51 | 65.54 | 41.84 |
| 8004 | 56.23 | 69.82 | 77.38 | 65.44 | 41.78 |
| 8006 | 56.2  | 69.72 | 77.27 | 65.35 | 41.74 |
| 8008 | 56.16 | 69.63 | 77.14 | 65.24 | 41.71 |
| 8010 | 56.1  | 69.52 | 76.99 | 65.12 | 41.64 |
| 8012 | 56.01 | 69.38 | 76.84 | 64.99 | 41.57 |
| 8014 | 55.99 | 69.3  | 76.74 | 64.91 | 41.55 |
| 8016 | 55.94 | 69.21 | 76.61 | 64.82 | 41.52 |
| 8018 | 55.89 | 69.11 | 76.49 | 64.73 | 41.47 |
| 8020 | 55.8  | 68.96 | 76.35 | 64.61 | 41.41 |
| 8022 | 55.73 | 68.83 | 76.17 | 64.48 | 41.33 |
| 8024 | 55.68 | 68.74 | 76.06 | 64.37 | 41.28 |
| 8026 | 55.62 | 68.64 | 75.92 | 64.27 | 41.23 |
| 8028 | 55.58 | 68.54 | 75.81 | 64.19 | 41.2  |

|      |       |       |       |       |       |
|------|-------|-------|-------|-------|-------|
| 8030 | 55.55 | 68.46 | 75.69 | 64.11 | 41.17 |
| 8032 | 55.51 | 68.37 | 75.58 | 64.02 | 41.14 |
| 8034 | 55.45 | 68.27 | 75.44 | 63.91 | 41.09 |
| 8036 | 55.4  | 68.18 | 75.32 | 63.81 | 41.04 |
| 8038 | 55.35 | 68.07 | 75.19 | 63.71 | 41    |
| 8040 | 55.31 | 67.99 | 75.08 | 63.62 | 40.97 |
| 8042 | 55.26 | 67.9  | 74.96 | 63.53 | 40.92 |
| 8044 | 55.19 | 67.77 | 74.81 | 63.41 | 40.85 |
| 8046 | 55.15 | 67.68 | 74.7  | 63.33 | 40.83 |
| 8048 | 55.11 | 67.59 | 74.59 | 63.23 | 40.77 |
| 8050 | 55.05 | 67.49 | 74.46 | 63.14 | 40.73 |
| 8052 | 55    | 67.37 | 74.34 | 63.05 | 40.69 |
| 8054 | 54.9  | 67.24 | 74.16 | 62.92 | 40.61 |
| 8056 | 54.84 | 67.12 | 74.03 | 62.79 | 40.54 |
| 8058 | 54.8  | 67.03 | 73.91 | 62.7  | 40.5  |
| 8060 | 54.77 | 66.95 | 73.8  | 62.62 | 40.48 |
| 8062 | 54.71 | 66.85 | 73.67 | 62.52 | 40.42 |
| 8064 | 54.69 | 66.78 | 73.57 | 62.43 | 40.41 |
| 8066 | 54.6  | 66.65 | 73.41 | 62.31 | 40.33 |
| 8068 | 54.57 | 66.57 | 73.31 | 62.23 | 40.3  |
| 8070 | 54.51 | 66.48 | 73.19 | 62.15 | 40.26 |
| 8072 | 54.45 | 66.36 | 73.05 | 62.03 | 40.2  |
| 8074 | 54.45 | 66.32 | 72.98 | 61.98 | 40.21 |
| 8076 | 54.41 | 66.23 | 72.87 | 61.9  | 40.17 |
| 8078 | 54.38 | 66.14 | 72.76 | 61.84 | 40.14 |
| 8080 | 54.32 | 66.04 | 72.64 | 61.74 | 40.1  |
| 8082 | 54.28 | 65.95 | 72.52 | 61.62 | 40.04 |
| 8084 | 54.21 | 65.85 | 72.41 | 61.52 | 39.99 |
| 8086 | 54.15 | 65.73 | 72.26 | 61.42 | 39.94 |
| 8088 | 54.12 | 65.64 | 72.15 | 61.33 | 39.9  |
| 8090 | 54.03 | 65.51 | 71.99 | 61.2  | 39.82 |
| 8092 | 53.98 | 65.4  | 71.87 | 61.1  | 39.77 |
| 8094 | 53.93 | 65.31 | 71.74 | 61.01 | 39.74 |
| 8096 | 53.84 | 65.19 | 71.61 | 60.89 | 39.66 |
| 8098 | 53.83 | 65.12 | 71.51 | 60.82 | 39.64 |
| 8100 | 53.76 | 65.02 | 71.38 | 60.71 | 39.59 |
| 8102 | 53.72 | 64.92 | 71.25 | 60.62 | 39.55 |
| 8104 | 53.66 | 64.82 | 71.13 | 60.52 | 39.51 |
| 8106 | 53.64 | 64.75 | 71.04 | 60.46 | 39.47 |
| 8108 | 53.6  | 64.67 | 70.94 | 60.4  | 39.45 |
| 8110 | 53.54 | 64.57 | 70.83 | 60.29 | 39.4  |
| 8112 | 53.49 | 64.48 | 70.7  | 60.19 | 39.35 |
| 8114 | 53.45 | 64.39 | 70.59 | 60.1  | 39.31 |
| 8116 | 53.4  | 64.3  | 70.49 | 60.02 | 39.27 |

|      |       |       |       |       |       |
|------|-------|-------|-------|-------|-------|
| 8118 | 53.35 | 64.21 | 70.36 | 59.94 | 39.23 |
| 8120 | 53.3  | 64.13 | 70.25 | 59.83 | 39.19 |
| 8122 | 53.22 | 64    | 70.1  | 59.69 | 39.1  |
| 8124 | 53.17 | 63.91 | 69.99 | 59.59 | 39.07 |
| 8126 | 53.13 | 63.82 | 69.9  | 59.52 | 39.04 |
| 8128 | 53.11 | 63.76 | 69.79 | 59.46 | 39.02 |
| 8130 | 53.07 | 63.68 | 69.69 | 59.38 | 38.99 |
| 8132 | 53.02 | 63.57 | 69.58 | 59.29 | 38.96 |
| 8134 | 52.94 | 63.45 | 69.41 | 59.17 | 38.88 |
| 8136 | 52.92 | 63.39 | 69.34 | 59.1  | 38.86 |
| 8138 | 52.89 | 63.32 | 69.26 | 59.05 | 38.85 |
| 8140 | 52.84 | 63.22 | 69.15 | 58.96 | 38.81 |
| 8142 | 52.8  | 63.14 | 69.02 | 58.86 | 38.76 |
| 8144 | 52.76 | 63.06 | 68.92 | 58.78 | 38.73 |
| 8146 | 52.73 | 62.99 | 68.83 | 58.71 | 38.71 |
| 8148 | 52.68 | 62.9  | 68.75 | 58.65 | 38.69 |
| 8150 | 52.63 | 62.83 | 68.62 | 58.54 | 38.64 |
| 8152 | 52.59 | 62.74 | 68.51 | 58.45 | 38.59 |
| 8154 | 52.52 | 62.64 | 68.39 | 58.33 | 38.54 |
| 8156 | 52.47 | 62.56 | 68.29 | 58.26 | 38.5  |
| 8158 | 52.44 | 62.47 | 68.21 | 58.2  | 38.48 |
| 8160 | 52.36 | 62.36 | 68.05 | 58.06 | 38.4  |
| 8162 | 52.32 | 62.27 | 67.94 | 57.98 | 38.36 |
| 8164 | 52.27 | 62.19 | 67.84 | 57.9  | 38.32 |
| 8166 | 52.27 | 62.14 | 67.76 | 57.85 | 38.31 |
| 8168 | 52.19 | 62.03 | 67.63 | 57.74 | 38.27 |
| 8170 | 52.15 | 61.95 | 67.53 | 57.67 | 38.22 |
| 8172 | 52.09 | 61.85 | 67.41 | 57.57 | 38.17 |
| 8174 | 52.03 | 61.75 | 67.29 | 57.49 | 38.13 |
| 8176 | 52.04 | 61.71 | 67.22 | 57.44 | 38.13 |
| 8178 | 51.97 | 61.61 | 67.1  | 57.34 | 38.07 |
| 8180 | 51.92 | 61.52 | 67    | 57.26 | 38.04 |
| 8182 | 51.88 | 61.43 | 66.88 | 57.16 | 38    |
| 8184 | 51.82 | 61.33 | 66.77 | 57.06 | 37.94 |
| 8186 | 51.82 | 61.3  | 66.72 | 57.04 | 37.96 |
| 8188 | 51.8  | 61.24 | 66.63 | 56.98 | 37.93 |
| 8190 | 51.72 | 61.12 | 66.49 | 56.86 | 37.87 |
| 8192 | 51.69 | 61.05 | 66.42 | 56.8  | 37.84 |
| 8194 | 51.66 | 60.98 | 66.33 | 56.73 | 37.81 |
| 8196 | 51.61 | 60.9  | 66.23 | 56.65 | 37.78 |
| 8198 | 51.58 | 60.81 | 66.12 | 56.57 | 37.74 |
| 8200 | 51.53 | 60.73 | 66.03 | 56.48 | 37.71 |
| 8202 | 51.48 | 60.64 | 65.91 | 56.38 | 37.65 |
| 8204 | 51.44 | 60.57 | 65.83 | 56.33 | 37.63 |

|      |       |       |       |       |       |
|------|-------|-------|-------|-------|-------|
| 8206 | 51.41 | 60.5  | 65.7  | 56.26 | 37.6  |
| 8208 | 51.32 | 60.37 | 65.56 | 56.11 | 37.52 |
| 8210 | 51.28 | 60.29 | 65.47 | 56.06 | 37.49 |
| 8212 | 51.23 | 60.22 | 65.37 | 55.97 | 37.45 |
| 8214 | 51.21 | 60.15 | 65.28 | 55.91 | 37.43 |
| 8216 | 51.18 | 60.09 | 65.19 | 55.82 | 37.39 |
| 8218 | 51.15 | 60.02 | 65.1  | 55.76 | 37.37 |
| 8220 | 51.08 | 59.9  | 65    | 55.67 | 37.33 |
| 8222 | 51.05 | 59.84 | 64.89 | 55.59 | 37.3  |
| 8224 | 51.02 | 59.77 | 64.8  | 55.52 | 37.26 |
| 8226 | 50.98 | 59.71 | 64.72 | 55.45 | 37.24 |
| 8228 | 50.89 | 59.6  | 64.59 | 55.34 | 37.17 |
| 8230 | 50.85 | 59.49 | 64.47 | 55.24 | 37.14 |
| 8232 | 50.8  | 59.41 | 64.37 | 55.15 | 37.09 |
| 8234 | 50.8  | 59.37 | 64.31 | 55.11 | 37.09 |
| 8236 | 50.72 | 59.26 | 64.19 | 55.01 | 37.04 |
| 8238 | 50.67 | 59.18 | 64.08 | 54.94 | 37    |
| 8240 | 50.63 | 59.09 | 63.98 | 54.85 | 36.95 |
| 8242 | 50.59 | 59.02 | 63.89 | 54.77 | 36.91 |
| 8244 | 50.53 | 58.93 | 63.8  | 54.7  | 36.88 |
| 8246 | 50.5  | 58.85 | 63.69 | 54.63 | 36.85 |
| 8248 | 50.49 | 58.82 | 63.61 | 54.57 | 36.84 |
| 8250 | 50.44 | 58.74 | 63.52 | 54.48 | 36.78 |
| 8252 | 50.39 | 58.63 | 63.44 | 54.43 | 36.77 |
| 8254 | 50.33 | 58.55 | 63.3  | 54.33 | 36.72 |
| 8256 | 50.31 | 58.5  | 63.23 | 54.27 | 36.69 |
| 8258 | 50.27 | 58.42 | 63.13 | 54.19 | 36.65 |
| 8260 | 50.25 | 58.37 | 63.08 | 54.15 | 36.63 |
| 8262 | 50.16 | 58.24 | 62.93 | 54.03 | 36.57 |
| 8264 | 50.12 | 58.17 | 62.84 | 53.97 | 36.54 |
| 8266 | 50.06 | 58.07 | 62.71 | 53.84 | 36.48 |
| 8268 | 50.03 | 58.03 | 62.66 | 53.81 | 36.47 |
| 8270 | 49.99 | 57.94 | 62.57 | 53.74 | 36.44 |
| 8272 | 49.96 | 57.87 | 62.47 | 53.66 | 36.4  |
| 8274 | 49.92 | 57.8  | 62.39 | 53.59 | 36.36 |
| 8276 | 49.86 | 57.72 | 62.28 | 53.5  | 36.31 |
| 8278 | 49.84 | 57.65 | 62.21 | 53.46 | 36.3  |
| 8280 | 49.8  | 57.59 | 62.11 | 53.39 | 36.27 |
| 8282 | 49.76 | 57.51 | 62.02 | 53.32 | 36.23 |
| 8284 | 49.71 | 57.45 | 61.94 | 53.24 | 36.2  |
| 8286 | 49.66 | 57.35 | 61.82 | 53.16 | 36.16 |
| 8288 | 49.64 | 57.3  | 61.76 | 53.11 | 36.15 |
| 8290 | 49.6  | 57.23 | 61.66 | 53.03 | 36.1  |
| 8292 | 49.55 | 57.15 | 61.57 | 52.95 | 36.07 |

|      |       |       |       |       |       |
|------|-------|-------|-------|-------|-------|
| 8294 | 49.53 | 57.1  | 61.49 | 52.88 | 36.06 |
| 8296 | 49.47 | 57.01 | 61.39 | 52.8  | 36.01 |
| 8298 | 49.41 | 56.91 | 61.27 | 52.7  | 35.97 |
| 8300 | 49.38 | 56.85 | 61.19 | 52.65 | 35.94 |
| 8302 | 49.36 | 56.81 | 61.13 | 52.59 | 35.94 |
| 8304 | 49.31 | 56.73 | 61.03 | 52.51 | 35.89 |
| 8306 | 49.26 | 56.65 | 60.93 | 52.44 | 35.85 |
| 8308 | 49.22 | 56.58 | 60.85 | 52.37 | 35.82 |
| 8310 | 49.19 | 56.49 | 60.76 | 52.31 | 35.79 |
| 8312 | 49.14 | 56.43 | 60.66 | 52.23 | 35.75 |
| 8314 | 49.11 | 56.36 | 60.58 | 52.17 | 35.72 |
| 8316 | 49.07 | 56.29 | 60.5  | 52.1  | 35.69 |
| 8318 | 49.03 | 56.21 | 60.42 | 52.03 | 35.66 |
| 8320 | 48.99 | 56.14 | 60.33 | 51.95 | 35.63 |
| 8322 | 48.96 | 56.09 | 60.25 | 51.9  | 35.6  |
| 8324 | 48.88 | 55.99 | 60.15 | 51.81 | 35.55 |
| 8326 | 48.84 | 55.9  | 60.04 | 51.73 | 35.5  |
| 8328 | 48.82 | 55.84 | 59.96 | 51.67 | 35.49 |
| 8330 | 48.77 | 55.77 | 59.88 | 51.61 | 35.47 |
| 8332 | 48.75 | 55.73 | 59.81 | 51.56 | 35.44 |
| 8334 | 48.7  | 55.65 | 59.71 | 51.48 | 35.41 |
| 8336 | 48.66 | 55.57 | 59.61 | 51.39 | 35.36 |
| 8338 | 48.62 | 55.51 | 59.54 | 51.34 | 35.34 |
| 8340 | 48.58 | 55.43 | 59.46 | 51.28 | 35.32 |
| 8342 | 48.52 | 55.34 | 59.34 | 51.18 | 35.26 |
| 8344 | 48.49 | 55.27 | 59.26 | 51.12 | 35.24 |
| 8346 | 48.44 | 55.2  | 59.17 | 51.05 | 35.19 |
| 8348 | 48.38 | 55.11 | 59.07 | 50.97 | 35.15 |
| 8350 | 48.34 | 55.05 | 59    | 50.9  | 35.12 |
| 8352 | 48.34 | 55.01 | 58.93 | 50.85 | 35.12 |
| 8354 | 48.29 | 54.94 | 58.84 | 50.79 | 35.08 |
| 8356 | 48.25 | 54.86 | 58.75 | 50.72 | 35.04 |
| 8358 | 48.23 | 54.82 | 58.68 | 50.67 | 35.04 |
| 8360 | 48.14 | 54.71 | 58.58 | 50.56 | 34.98 |
| 8362 | 48.14 | 54.68 | 58.52 | 50.52 | 34.98 |
| 8364 | 48.11 | 54.62 | 58.44 | 50.48 | 34.96 |
| 8366 | 48.07 | 54.56 | 58.35 | 50.42 | 34.93 |
| 8368 | 48.03 | 54.49 | 58.25 | 50.32 | 34.87 |
| 8370 | 47.99 | 54.43 | 58.19 | 50.27 | 34.86 |
| 8372 | 47.96 | 54.37 | 58.12 | 50.22 | 34.84 |
| 8374 | 47.92 | 54.3  | 58.03 | 50.15 | 34.81 |
| 8376 | 47.88 | 54.23 | 57.94 | 50.08 | 34.78 |
| 8378 | 47.85 | 54.17 | 57.87 | 50.02 | 34.75 |
| 8380 | 47.8  | 54.11 | 57.79 | 49.95 | 34.72 |

|      |       |       |       |       |       |
|------|-------|-------|-------|-------|-------|
| 8382 | 47.77 | 54.03 | 57.7  | 49.88 | 34.69 |
| 8384 | 47.73 | 53.97 | 57.62 | 49.82 | 34.66 |
| 8386 | 47.7  | 53.92 | 57.55 | 49.76 | 34.63 |
| 8388 | 47.67 | 53.85 | 57.47 | 49.71 | 34.62 |
| 8390 | 47.63 | 53.78 | 57.38 | 49.63 | 34.59 |
| 8392 | 47.59 | 53.71 | 57.3  | 49.56 | 34.55 |
| 8394 | 47.59 | 53.69 | 57.28 | 49.55 | 34.56 |
| 8396 | 47.55 | 53.63 | 57.2  | 49.5  | 34.53 |
| 8398 | 47.49 | 53.52 | 57.07 | 49.4  | 34.47 |
| 8400 | 47.45 | 53.45 | 56.99 | 49.32 | 34.44 |
| 8402 | 47.44 | 53.43 | 56.96 | 49.3  | 34.45 |
| 8404 | 47.4  | 53.35 | 56.89 | 49.25 | 34.42 |
| 8406 | 47.39 | 53.32 | 56.8  | 49.2  | 34.41 |
| 8408 | 47.3  | 53.21 | 56.69 | 49.08 | 34.33 |
| 8410 | 47.26 | 53.14 | 56.61 | 49    | 34.3  |
| 8412 | 47.22 | 53.08 | 56.53 | 48.94 | 34.27 |
| 8414 | 47.18 | 53.01 | 56.44 | 48.88 | 34.25 |
| 8416 | 47.11 | 52.91 | 56.33 | 48.78 | 34.2  |
| 8418 | 47.1  | 52.88 | 56.28 | 48.75 | 34.18 |
| 8420 | 47.08 | 52.82 | 56.22 | 48.69 | 34.16 |
| 8422 | 47.04 | 52.76 | 56.15 | 48.63 | 34.13 |
| 8424 | 47.01 | 52.69 | 56.06 | 48.57 | 34.11 |
| 8426 | 46.96 | 52.63 | 55.98 | 48.5  | 34.07 |
| 8428 | 46.91 | 52.55 | 55.89 | 48.43 | 34.02 |
| 8430 | 46.9  | 52.5  | 55.82 | 48.39 | 34.03 |
| 8432 | 46.86 | 52.44 | 55.74 | 48.32 | 33.98 |
| 8434 | 46.81 | 52.36 | 55.66 | 48.25 | 33.96 |
| 8436 | 46.77 | 52.31 | 55.59 | 48.19 | 33.93 |
| 8438 | 46.76 | 52.26 | 55.52 | 48.15 | 33.92 |
| 8440 | 46.71 | 52.18 | 55.43 | 48.08 | 33.88 |
| 8442 | 46.67 | 52.12 | 55.37 | 48.02 | 33.85 |
| 8444 | 46.65 | 52.08 | 55.3  | 47.98 | 33.83 |
| 8446 | 46.62 | 52.02 | 55.23 | 47.92 | 33.81 |
| 8448 | 46.61 | 51.99 | 55.19 | 47.9  | 33.82 |
| 8450 | 46.55 | 51.91 | 55.09 | 47.82 | 33.76 |
| 8452 | 46.55 | 51.88 | 55.05 | 47.78 | 33.75 |
| 8454 | 46.5  | 51.81 | 54.96 | 47.72 | 33.73 |
| 8456 | 46.47 | 51.75 | 54.87 | 47.65 | 33.69 |
| 8458 | 46.41 | 51.67 | 54.78 | 47.58 | 33.64 |
| 8460 | 46.39 | 51.63 | 54.74 | 47.55 | 33.64 |
| 8462 | 46.33 | 51.54 | 54.63 | 47.46 | 33.6  |
| 8464 | 46.29 | 51.49 | 54.56 | 47.4  | 33.56 |
| 8466 | 46.26 | 51.43 | 54.49 | 47.34 | 33.54 |
| 8468 | 46.26 | 51.42 | 54.47 | 47.33 | 33.56 |



|      |       |       |       |       |       |
|------|-------|-------|-------|-------|-------|
| 8470 | 46.19 | 51.31 | 54.35 | 47.23 | 33.5  |
| 8472 | 46.16 | 51.26 | 54.28 | 47.17 | 33.46 |
| 8474 | 46.15 | 51.22 | 54.24 | 47.13 | 33.45 |
| 8476 | 46.12 | 51.16 | 54.16 | 47.08 | 33.42 |
| 8478 | 46.08 | 51.11 | 54.09 | 47.05 | 33.42 |
| 8480 | 46.02 | 51.03 | 54    | 46.96 | 33.35 |
| 8482 | 45.96 | 50.95 | 53.91 | 46.88 | 33.31 |
| 8484 | 45.94 | 50.89 | 53.86 | 46.84 | 33.3  |
| 8486 | 45.85 | 50.8  | 53.73 | 46.73 | 33.22 |
| 8488 | 45.86 | 50.78 | 53.7  | 46.71 | 33.22 |
| 8490 | 45.85 | 50.74 | 53.65 | 46.68 | 33.23 |
| 8492 | 45.81 | 50.69 | 53.59 | 46.62 | 33.2  |
| 8494 | 45.76 | 50.61 | 53.47 | 46.53 | 33.15 |
| 8496 | 45.73 | 50.56 | 53.42 | 46.49 | 33.14 |
| 8498 | 45.68 | 50.49 | 53.34 | 46.41 | 33.09 |
| 8500 | 45.63 | 50.43 | 53.26 | 46.35 | 33.06 |
| 8502 | 45.61 | 50.37 | 53.2  | 46.3  | 33.05 |
| 8504 | 45.59 | 50.33 | 53.15 | 46.27 | 33.04 |
| 8506 | 45.58 | 50.3  | 53.1  | 46.23 | 33.03 |
| 8508 | 45.52 | 50.23 | 53.02 | 46.17 | 32.99 |
| 8510 | 45.49 | 50.15 | 52.93 | 46.09 | 32.94 |
| 8512 | 45.41 | 50.06 | 52.82 | 46    | 32.9  |
| 8514 | 45.42 | 50.05 | 52.8  | 46    | 32.9  |
| 8516 | 45.39 | 50.01 | 52.74 | 45.96 | 32.89 |
| 8518 | 45.34 | 49.92 | 52.65 | 45.89 | 32.86 |
| 8520 | 45.31 | 49.88 | 52.58 | 45.83 | 32.83 |
| 8522 | 45.27 | 49.8  | 52.5  | 45.76 | 32.79 |
| 8524 | 45.24 | 49.76 | 52.45 | 45.72 | 32.78 |
| 8526 | 45.16 | 49.65 | 52.33 | 45.61 | 32.71 |
| 8528 | 45.14 | 49.6  | 52.27 | 45.57 | 32.68 |
| 8530 | 45.15 | 49.59 | 52.25 | 45.56 | 32.7  |
| 8532 | 45.09 | 49.53 | 52.17 | 45.48 | 32.66 |
| 8534 | 45.07 | 49.48 | 52.1  | 45.42 | 32.65 |
| 8536 | 45.05 | 49.43 | 52.05 | 45.4  | 32.65 |
| 8538 | 45.02 | 49.39 | 51.99 | 45.35 | 32.62 |
| 8540 | 44.98 | 49.32 | 51.91 | 45.28 | 32.59 |
| 8542 | 44.92 | 49.24 | 51.82 | 45.2  | 32.55 |
| 8544 | 44.88 | 49.18 | 51.75 | 45.14 | 32.51 |
| 8546 | 44.87 | 49.16 | 51.73 | 45.12 | 32.52 |
| 8548 | 44.84 | 49.12 | 51.67 | 45.07 | 32.49 |
| 8550 | 44.81 | 49.05 | 51.59 | 45.04 | 32.49 |
| 8552 | 44.78 | 49.01 | 51.53 | 44.97 | 32.46 |
| 8554 | 44.74 | 48.94 | 51.46 | 44.91 | 32.42 |
| 8556 | 44.71 | 48.89 | 51.4  | 44.86 | 32.4  |

|      |       |       |       |       |       |
|------|-------|-------|-------|-------|-------|
| 8558 | 44.7  | 48.87 | 51.36 | 44.85 | 32.41 |
| 8560 | 44.67 | 48.8  | 51.29 | 44.78 | 32.38 |
| 8562 | 44.63 | 48.75 | 51.22 | 44.74 | 32.34 |
| 8564 | 44.59 | 48.69 | 51.16 | 44.69 | 32.32 |
| 8566 | 44.56 | 48.64 | 51.1  | 44.63 | 32.3  |
| 8568 | 44.53 | 48.59 | 51.03 | 44.58 | 32.27 |
| 8570 | 44.5  | 48.54 | 50.97 | 44.53 | 32.25 |
| 8572 | 44.43 | 48.43 | 50.86 | 44.44 | 32.19 |
| 8574 | 44.42 | 48.42 | 50.83 | 44.42 | 32.2  |
| 8576 | 44.41 | 48.39 | 50.77 | 44.38 | 32.19 |
| 8578 | 44.37 | 48.33 | 50.71 | 44.33 | 32.16 |
| 8580 | 44.32 | 48.26 | 50.64 | 44.27 | 32.11 |
| 8582 | 44.28 | 48.2  | 50.56 | 44.2  | 32.09 |
| 8584 | 44.25 | 48.15 | 50.5  | 44.15 | 32.06 |
| 8586 | 44.23 | 48.11 | 50.46 | 44.12 | 32.06 |
| 8588 | 44.21 | 48.07 | 50.4  | 44.08 | 32.04 |
| 8590 | 44.17 | 48.01 | 50.35 | 44.03 | 32.02 |
| 8592 | 44.13 | 47.96 | 50.27 | 43.97 | 32    |
| 8594 | 44.12 | 47.92 | 50.21 | 43.92 | 31.98 |
| 8596 | 44.07 | 47.87 | 50.15 | 43.86 | 31.96 |
| 8598 | 44.05 | 47.81 | 50.08 | 43.82 | 31.94 |
| 8600 | 44.01 | 47.75 | 50.01 | 43.76 | 31.9  |
| 8602 | 43.98 | 47.72 | 49.96 | 43.72 | 31.89 |
| 8604 | 43.95 | 47.67 | 49.92 | 43.69 | 31.88 |
| 8606 | 43.94 | 47.63 | 49.86 | 43.64 | 31.86 |
| 8608 | 43.92 | 47.6  | 49.81 | 43.62 | 31.85 |
| 8610 | 43.87 | 47.53 | 49.73 | 43.55 | 31.8  |
| 8612 | 43.84 | 47.5  | 49.68 | 43.51 | 31.79 |
| 8614 | 43.84 | 47.48 | 49.63 | 43.48 | 31.79 |
| 8616 | 43.8  | 47.42 | 49.58 | 43.43 | 31.77 |
| 8618 | 43.77 | 47.37 | 49.52 | 43.38 | 31.76 |
| 8620 | 43.7  | 47.28 | 49.43 | 43.31 | 31.71 |
| 8622 | 43.66 | 47.22 | 49.36 | 43.24 | 31.67 |
| 8624 | 43.65 | 47.2  | 49.31 | 43.2  | 31.65 |
| 8626 | 43.66 | 47.19 | 49.29 | 43.19 | 31.68 |
| 8628 | 43.58 | 47.1  | 49.19 | 43.11 | 31.63 |
| 8630 | 43.57 | 47.06 | 49.14 | 43.07 | 31.61 |
| 8632 | 43.54 | 47.01 | 49.08 | 43.02 | 31.59 |
| 8634 | 43.53 | 46.99 | 49.05 | 43.01 | 31.6  |
| 8636 | 43.5  | 46.95 | 49    | 42.96 | 31.58 |
| 8638 | 43.43 | 46.86 | 48.89 | 42.88 | 31.52 |
| 8640 | 43.43 | 46.84 | 48.86 | 42.86 | 31.53 |
| 8642 | 43.36 | 46.76 | 48.77 | 42.77 | 31.46 |
| 8644 | 43.32 | 46.69 | 48.7  | 42.72 | 31.43 |

|      |       |       |       |       |       |
|------|-------|-------|-------|-------|-------|
| 8646 | 43.29 | 46.63 | 48.62 | 42.66 | 31.4  |
| 8648 | 43.27 | 46.6  | 48.58 | 42.63 | 31.4  |
| 8650 | 43.23 | 46.56 | 48.53 | 42.59 | 31.37 |
| 8652 | 43.2  | 46.5  | 48.46 | 42.54 | 31.36 |
| 8654 | 43.18 | 46.45 | 48.41 | 42.49 | 31.33 |
| 8656 | 43.14 | 46.41 | 48.35 | 42.44 | 31.3  |
| 8658 | 43.07 | 46.32 | 48.24 | 42.35 | 31.24 |
| 8660 | 43.05 | 46.28 | 48.2  | 42.3  | 31.22 |
| 8662 | 43.05 | 46.27 | 48.17 | 42.3  | 31.25 |
| 8664 | 43.03 | 46.23 | 48.12 | 42.26 | 31.22 |
| 8666 | 43.03 | 46.21 | 48.08 | 42.24 | 31.23 |
| 8668 | 42.99 | 46.15 | 48.04 | 42.19 | 31.22 |
| 8670 | 42.94 | 46.08 | 47.96 | 42.13 | 31.17 |
| 8672 | 42.88 | 45.99 | 47.86 | 42.04 | 31.1  |
| 8674 | 42.83 | 45.94 | 47.8  | 41.99 | 31.07 |
| 8676 | 42.81 | 45.89 | 47.74 | 41.95 | 31.05 |
| 8678 | 42.79 | 45.85 | 47.68 | 41.91 | 31.04 |
| 8680 | 42.75 | 45.8  | 47.63 | 41.86 | 31.01 |
| 8682 | 42.73 | 45.77 | 47.59 | 41.83 | 31.01 |
| 8684 | 42.69 | 45.72 | 47.53 | 41.78 | 30.97 |
| 8686 | 42.67 | 45.68 | 47.48 | 41.73 | 30.96 |
| 8688 | 42.63 | 45.61 | 47.39 | 41.66 | 30.91 |
| 8690 | 42.61 | 45.58 | 47.36 | 41.64 | 30.91 |
| 8692 | 42.58 | 45.54 | 47.31 | 41.61 | 30.89 |
| 8694 | 42.56 | 45.49 | 47.25 | 41.55 | 30.87 |
| 8696 | 42.55 | 45.47 | 47.22 | 41.54 | 30.88 |
| 8698 | 42.51 | 45.41 | 47.15 | 41.48 | 30.84 |
| 8700 | 42.47 | 45.36 | 47.1  | 41.43 | 30.82 |
| 8702 | 42.44 | 45.3  | 47.04 | 41.36 | 30.78 |
| 8704 | 42.41 | 45.26 | 46.98 | 41.33 | 30.77 |
| 8706 | 42.39 | 45.22 | 46.93 | 41.3  | 30.76 |
| 8708 | 42.36 | 45.18 | 46.88 | 41.26 | 30.74 |
| 8710 | 42.34 | 45.13 | 46.83 | 41.22 | 30.72 |
| 8712 | 42.31 | 45.09 | 46.78 | 41.16 | 30.7  |
| 8714 | 42.28 | 45.05 | 46.72 | 41.12 | 30.68 |
| 8716 | 42.24 | 44.99 | 46.66 | 41.06 | 30.66 |
| 8718 | 42.24 | 44.97 | 46.63 | 41.04 | 30.66 |
| 8720 | 42.24 | 44.96 | 46.61 | 41.04 | 30.68 |
| 8722 | 42.19 | 44.9  | 46.53 | 40.97 | 30.62 |
| 8724 | 42.16 | 44.87 | 46.5  | 40.95 | 30.62 |
| 8726 | 42.12 | 44.8  | 46.42 | 40.88 | 30.58 |
| 8728 | 42.08 | 44.74 | 46.35 | 40.83 | 30.55 |
| 8730 | 42.05 | 44.69 | 46.29 | 40.78 | 30.53 |
| 8732 | 42.01 | 44.66 | 46.24 | 40.74 | 30.51 |

|      |       |       |       |       |       |
|------|-------|-------|-------|-------|-------|
| 8734 | 41.99 | 44.6  | 46.19 | 40.7  | 30.49 |
| 8736 | 41.95 | 44.56 | 46.12 | 40.65 | 30.46 |
| 8738 | 41.93 | 44.51 | 46.07 | 40.61 | 30.44 |
| 8740 | 41.89 | 44.44 | 46    | 40.55 | 30.41 |
| 8742 | 41.86 | 44.41 | 45.96 | 40.53 | 30.4  |
| 8744 | 41.83 | 44.36 | 45.9  | 40.48 | 30.36 |
| 8746 | 41.79 | 44.3  | 45.83 | 40.42 | 30.33 |
| 8748 | 41.78 | 44.28 | 45.8  | 40.39 | 30.32 |
| 8750 | 41.78 | 44.26 | 45.77 | 40.36 | 30.32 |
| 8752 | 41.75 | 44.2  | 45.71 | 40.32 | 30.3  |
| 8754 | 41.72 | 44.17 | 45.66 | 40.29 | 30.3  |
| 8756 | 41.71 | 44.15 | 45.63 | 40.27 | 30.3  |
| 8758 | 41.68 | 44.1  | 45.58 | 40.23 | 30.27 |
| 8760 | 41.65 | 44.06 | 45.53 | 40.18 | 30.24 |
| 8762 | 41.62 | 44.01 | 45.47 | 40.14 | 30.22 |
| 8764 | 41.59 | 43.97 | 45.42 | 40.1  | 30.21 |
| 8766 | 41.57 | 43.93 | 45.37 | 40.06 | 30.2  |
| 8768 | 41.51 | 43.86 | 45.29 | 39.98 | 30.15 |
| 8770 | 41.47 | 43.81 | 45.23 | 39.94 | 30.12 |
| 8772 | 41.46 | 43.79 | 45.2  | 39.91 | 30.12 |
| 8774 | 41.43 | 43.75 | 45.15 | 39.88 | 30.1  |
| 8776 | 41.4  | 43.69 | 45.09 | 39.82 | 30.08 |
| 8778 | 41.39 | 43.65 | 45.04 | 39.78 | 30.06 |
| 8780 | 41.35 | 43.62 | 45    | 39.76 | 30.04 |
| 8782 | 41.35 | 43.6  | 44.97 | 39.74 | 30.05 |
| 8784 | 41.32 | 43.56 | 44.92 | 39.69 | 30.04 |
| 8786 | 41.29 | 43.52 | 44.87 | 39.66 | 30.03 |
| 8788 | 41.27 | 43.47 | 44.82 | 39.62 | 30    |
| 8790 | 41.25 | 43.44 | 44.77 | 39.58 | 29.99 |
| 8792 | 41.22 | 43.39 | 44.72 | 39.54 | 29.97 |
| 8794 | 41.2  | 43.37 | 44.69 | 39.52 | 29.96 |
| 8796 | 41.14 | 43.29 | 44.62 | 39.45 | 29.92 |
| 8798 | 41.1  | 43.25 | 44.56 | 39.42 | 29.91 |
| 8800 | 41.07 | 43.2  | 44.5  | 39.35 | 29.86 |
| 8802 | 41.08 | 43.2  | 44.48 | 39.34 | 29.88 |
| 8804 | 41.06 | 43.16 | 44.45 | 39.31 | 29.88 |
| 8806 | 41.04 | 43.13 | 44.4  | 39.27 | 29.86 |
| 8808 | 41    | 43.08 | 44.35 | 39.23 | 29.84 |
| 8810 | 40.96 | 43.05 | 44.3  | 39.19 | 29.81 |
| 8812 | 40.96 | 43.01 | 44.26 | 39.16 | 29.81 |
| 8814 | 40.93 | 42.95 | 44.19 | 39.09 | 29.78 |
| 8816 | 40.91 | 42.93 | 44.15 | 39.09 | 29.76 |
| 8818 | 40.89 | 42.9  | 44.12 | 39.06 | 29.76 |
| 8820 | 40.86 | 42.87 | 44.08 | 39.03 | 29.74 |

|      |       |       |       |       |       |
|------|-------|-------|-------|-------|-------|
| 8822 | 40.84 | 42.82 | 44.02 | 38.99 | 29.73 |
| 8824 | 40.84 | 42.82 | 44.02 | 38.97 | 29.73 |
| 8826 | 40.84 | 42.8  | 43.99 | 38.97 | 29.74 |
| 8828 | 40.76 | 42.72 | 43.9  | 38.89 | 29.69 |
| 8830 | 40.71 | 42.64 | 43.84 | 38.83 | 29.65 |
| 8832 | 40.7  | 42.63 | 43.8  | 38.8  | 29.64 |
| 8834 | 40.66 | 42.58 | 43.74 | 38.75 | 29.61 |
| 8836 | 40.62 | 42.52 | 43.68 | 38.69 | 29.57 |
| 8838 | 40.63 | 42.51 | 43.66 | 38.68 | 29.59 |
| 8840 | 40.57 | 42.44 | 43.59 | 38.62 | 29.55 |
| 8842 | 40.56 | 42.42 | 43.55 | 38.59 | 29.54 |
| 8844 | 40.53 | 42.37 | 43.5  | 38.55 | 29.53 |
| 8846 | 40.51 | 42.35 | 43.46 | 38.52 | 29.53 |
| 8848 | 40.47 | 42.29 | 43.39 | 38.47 | 29.5  |
| 8850 | 40.44 | 42.25 | 43.35 | 38.43 | 29.47 |
| 8852 | 40.42 | 42.21 | 43.31 | 38.39 | 29.45 |
| 8854 | 40.38 | 42.16 | 43.25 | 38.35 | 29.42 |
| 8856 | 40.34 | 42.11 | 43.19 | 38.3  | 29.39 |
| 8858 | 40.35 | 42.1  | 43.17 | 38.29 | 29.4  |
| 8860 | 40.31 | 42.06 | 43.12 | 38.24 | 29.37 |
| 8862 | 40.26 | 42    | 43.06 | 38.19 | 29.34 |
| 8864 | 40.24 | 41.96 | 43.01 | 38.15 | 29.32 |
| 8866 | 40.22 | 41.93 | 42.97 | 38.12 | 29.3  |
| 8868 | 40.19 | 41.89 | 42.93 | 38.09 | 29.28 |
| 8870 | 40.17 | 41.86 | 42.89 | 38.06 | 29.28 |
| 8872 | 40.13 | 41.81 | 42.82 | 38    | 29.24 |
| 8874 | 40.12 | 41.79 | 42.8  | 37.99 | 29.24 |
| 8876 | 40.1  | 41.75 | 42.76 | 37.96 | 29.23 |
| 8878 | 40.07 | 41.69 | 42.69 | 37.92 | 29.2  |
| 8880 | 40.05 | 41.67 | 42.67 | 37.89 | 29.19 |
| 8882 | 40.01 | 41.62 | 42.62 | 37.85 | 29.17 |
| 8884 | 40    | 41.58 | 42.57 | 37.82 | 29.15 |
| 8886 | 39.98 | 41.56 | 42.53 | 37.79 | 29.14 |
| 8888 | 39.96 | 41.54 | 42.5  | 37.76 | 29.14 |
| 8890 | 39.94 | 41.5  | 42.46 | 37.73 | 29.12 |
| 8892 | 39.92 | 41.46 | 42.42 | 37.69 | 29.11 |
| 8894 | 39.92 | 41.46 | 42.41 | 37.69 | 29.13 |
| 8896 | 39.87 | 41.4  | 42.34 | 37.63 | 29.1  |
| 8898 | 39.83 | 41.35 | 42.28 | 37.58 | 29.06 |
| 8900 | 39.8  | 41.32 | 42.24 | 37.54 | 29.05 |
| 8902 | 39.78 | 41.28 | 42.2  | 37.51 | 29.03 |
| 8904 | 39.76 | 41.25 | 42.15 | 37.47 | 29.02 |
| 8906 | 39.75 | 41.23 | 42.14 | 37.46 | 29.02 |
| 8908 | 39.72 | 41.2  | 42.1  | 37.44 | 29    |

|      |       |       |       |       |       |
|------|-------|-------|-------|-------|-------|
| 8910 | 39.71 | 41.17 | 42.05 | 37.41 | 29    |
| 8912 | 39.66 | 41.11 | 41.99 | 37.35 | 28.95 |
| 8914 | 39.66 | 41.1  | 41.98 | 37.36 | 28.97 |
| 8916 | 39.67 | 41.08 | 41.97 | 37.35 | 28.98 |
| 8918 | 39.58 | 40.99 | 41.87 | 37.25 | 28.9  |
| 8920 | 39.57 | 40.97 | 41.83 | 37.22 | 28.89 |
| 8922 | 39.54 | 40.93 | 41.78 | 37.19 | 28.87 |
| 8924 | 39.54 | 40.92 | 41.76 | 37.18 | 28.88 |
| 8926 | 39.51 | 40.88 | 41.71 | 37.13 | 28.86 |
| 8928 | 39.48 | 40.85 | 41.66 | 37.09 | 28.84 |
| 8930 | 39.46 | 40.81 | 41.62 | 37.05 | 28.82 |
| 8932 | 39.45 | 40.8  | 41.61 | 37.06 | 28.84 |
| 8934 | 39.41 | 40.75 | 41.57 | 37.02 | 28.83 |
| 8936 | 39.38 | 40.7  | 41.5  | 36.95 | 28.78 |
| 8938 | 39.38 | 40.69 | 41.48 | 36.95 | 28.8  |
| 8940 | 39.34 | 40.67 | 41.44 | 36.92 | 28.77 |
| 8942 | 39.31 | 40.6  | 41.38 | 36.87 | 28.74 |
| 8944 | 39.29 | 40.58 | 41.36 | 36.85 | 28.73 |
| 8946 | 39.27 | 40.55 | 41.32 | 36.82 | 28.71 |
| 8948 | 39.27 | 40.53 | 41.3  | 36.82 | 28.72 |
| 8950 | 39.22 | 40.47 | 41.24 | 36.79 | 28.71 |
| 8952 | 39.24 | 40.47 | 41.22 | 36.76 | 28.71 |
| 8954 | 39.2  | 40.42 | 41.17 | 36.71 | 28.67 |
| 8956 | 39.17 | 40.39 | 41.12 | 36.67 | 28.65 |
| 8958 | 39.14 | 40.34 | 41.08 | 36.63 | 28.64 |
| 8960 | 39.09 | 40.29 | 41    | 36.57 | 28.59 |
| 8962 | 39.06 | 40.25 | 40.97 | 36.53 | 28.58 |
| 8964 | 39    | 40.19 | 40.9  | 36.47 | 28.54 |
| 8966 | 38.99 | 40.17 | 40.87 | 36.46 | 28.53 |
| 8968 | 38.99 | 40.15 | 40.85 | 36.44 | 28.54 |
| 8970 | 38.97 | 40.12 | 40.81 | 36.4  | 28.53 |
| 8972 | 38.95 | 40.08 | 40.78 | 36.38 | 28.52 |
| 8974 | 38.94 | 40.06 | 40.75 | 36.37 | 28.52 |
| 8976 | 38.93 | 40.05 | 40.73 | 36.37 | 28.52 |
| 8978 | 38.89 | 40    | 40.67 | 36.3  | 28.48 |
| 8980 | 38.86 | 39.95 | 40.62 | 36.27 | 28.46 |
| 8982 | 38.86 | 39.95 | 40.59 | 36.26 | 28.46 |
| 8984 | 38.84 | 39.92 | 40.56 | 36.24 | 28.45 |
| 8986 | 38.82 | 39.89 | 40.54 | 36.22 | 28.45 |
| 8988 | 38.77 | 39.82 | 40.47 | 36.15 | 28.4  |
| 8990 | 38.75 | 39.79 | 40.42 | 36.1  | 28.38 |
| 8992 | 38.73 | 39.78 | 40.4  | 36.09 | 28.39 |
| 8994 | 38.74 | 39.76 | 40.38 | 36.08 | 28.39 |
| 8996 | 38.72 | 39.75 | 40.35 | 36.05 | 28.38 |

|      |       |       |       |       |       |
|------|-------|-------|-------|-------|-------|
| 8998 | 38.71 | 39.73 | 40.34 | 36.04 | 28.4  |
| 9000 | 38.65 | 39.66 | 40.26 | 35.98 | 28.35 |
| 9002 | 38.61 | 39.61 | 40.2  | 35.93 | 28.32 |
| 9004 | 38.63 | 39.62 | 40.2  | 35.94 | 28.34 |
| 9006 | 38.6  | 39.58 | 40.15 | 35.89 | 28.3  |
| 9008 | 38.59 | 39.55 | 40.13 | 35.9  | 28.31 |
| 9010 | 38.53 | 39.49 | 40.07 | 35.84 | 28.26 |
| 9012 | 38.53 | 39.47 | 40.05 | 35.83 | 28.27 |
| 9014 | 38.5  | 39.45 | 40.02 | 35.81 | 28.27 |
| 9016 | 38.49 | 39.42 | 39.98 | 35.77 | 28.25 |
| 9018 | 38.47 | 39.39 | 39.95 | 35.73 | 28.22 |
| 9020 | 38.44 | 39.35 | 39.91 | 35.71 | 28.22 |
| 9022 | 38.41 | 39.31 | 39.85 | 35.66 | 28.19 |
| 9024 | 38.42 | 39.32 | 39.85 | 35.67 | 28.22 |
| 9026 | 38.4  | 39.29 | 39.82 | 35.63 | 28.21 |
| 9028 | 38.37 | 39.26 | 39.79 | 35.61 | 28.21 |
| 9030 | 38.36 | 39.23 | 39.75 | 35.58 | 28.19 |
| 9032 | 38.33 | 39.2  | 39.71 | 35.55 | 28.17 |
| 9034 | 38.31 | 39.17 | 39.68 | 35.52 | 28.15 |
| 9036 | 38.29 | 39.14 | 39.65 | 35.5  | 28.15 |
| 9038 | 38.27 | 39.11 | 39.61 | 35.48 | 28.14 |
| 9040 | 38.25 | 39.08 | 39.58 | 35.45 | 28.12 |
| 9042 | 38.23 | 39.05 | 39.54 | 35.43 | 28.11 |
| 9044 | 38.2  | 39.02 | 39.5  | 35.39 | 28.1  |
| 9046 | 38.16 | 38.96 | 39.44 | 35.34 | 28.06 |
| 9048 | 38.15 | 38.95 | 39.43 | 35.33 | 28.07 |
| 9050 | 38.13 | 38.92 | 39.39 | 35.3  | 28.06 |
| 9052 | 38.07 | 38.86 | 39.33 | 35.25 | 28    |
| 9054 | 38.05 | 38.83 | 39.27 | 35.21 | 28    |
| 9056 | 38.05 | 38.83 | 39.28 | 35.21 | 28.02 |
| 9058 | 38.01 | 38.77 | 39.22 | 35.16 | 27.98 |
| 9060 | 37.96 | 38.74 | 39.18 | 35.12 | 27.96 |
| 9062 | 37.95 | 38.7  | 39.15 | 35.1  | 27.96 |
| 9064 | 37.95 | 38.69 | 39.12 | 35.09 | 27.95 |
| 9066 | 37.93 | 38.68 | 39.11 | 35.06 | 27.95 |
| 9068 | 37.89 | 38.61 | 39.04 | 35    | 27.91 |
| 9070 | 37.85 | 38.57 | 38.99 | 34.97 | 27.88 |
| 9072 | 37.83 | 38.54 | 38.95 | 34.94 | 27.86 |
| 9074 | 37.81 | 38.5  | 38.91 | 34.92 | 27.85 |
| 9076 | 37.78 | 38.47 | 38.87 | 34.88 | 27.84 |
| 9078 | 37.78 | 38.46 | 38.86 | 34.87 | 27.83 |
| 9080 | 37.75 | 38.42 | 38.81 | 34.83 | 27.8  |
| 9082 | 37.72 | 38.38 | 38.77 | 34.8  | 27.79 |
| 9084 | 37.7  | 38.36 | 38.74 | 34.79 | 27.8  |

|      |       |       |       |       |       |
|------|-------|-------|-------|-------|-------|
| 9086 | 37.66 | 38.32 | 38.7  | 34.73 | 27.78 |
| 9088 | 37.67 | 38.3  | 38.67 | 34.72 | 27.78 |
| 9090 | 37.67 | 38.3  | 38.67 | 34.71 | 27.78 |
| 9092 | 37.65 | 38.3  | 38.65 | 34.7  | 27.78 |
| 9094 | 37.62 | 38.24 | 38.59 | 34.65 | 27.75 |
| 9096 | 37.57 | 38.2  | 38.54 | 34.61 | 27.73 |
| 9098 | 37.59 | 38.2  | 38.55 | 34.62 | 27.76 |
| 9100 | 37.57 | 38.18 | 38.54 | 34.61 | 27.74 |
| 9102 | 37.55 | 38.13 | 38.47 | 34.56 | 27.7  |
| 9104 | 37.53 | 38.11 | 38.44 | 34.55 | 27.7  |
| 9106 | 37.5  | 38.07 | 38.4  | 34.51 | 27.68 |
| 9108 | 37.48 | 38.04 | 38.38 | 34.5  | 27.68 |
| 9110 | 37.47 | 38.03 | 38.35 | 34.48 | 27.68 |
| 9112 | 37.45 | 38    | 38.32 | 34.46 | 27.67 |
| 9114 | 37.42 | 37.95 | 38.26 | 34.4  | 27.64 |
| 9116 | 37.37 | 37.91 | 38.21 | 34.36 | 27.62 |
| 9118 | 37.38 | 37.92 | 38.21 | 34.36 | 27.64 |
| 9120 | 37.36 | 37.88 | 38.19 | 34.34 | 27.62 |
| 9122 | 37.31 | 37.83 | 38.12 | 34.27 | 27.57 |
| 9124 | 37.31 | 37.82 | 38.12 | 34.27 | 27.6  |
| 9126 | 37.25 | 37.76 | 38.04 | 34.2  | 27.56 |
| 9128 | 37.22 | 37.72 | 38    | 34.18 | 27.52 |
| 9130 | 37.2  | 37.69 | 37.97 | 34.15 | 27.5  |
| 9132 | 37.21 | 37.69 | 37.96 | 34.17 | 27.53 |
| 9134 | 37.2  | 37.66 | 37.93 | 34.15 | 27.53 |
| 9136 | 37.16 | 37.61 | 37.88 | 34.09 | 27.49 |
| 9138 | 37.15 | 37.6  | 37.87 | 34.1  | 27.5  |
| 9140 | 37.12 | 37.57 | 37.82 | 34.05 | 27.46 |
| 9142 | 37.13 | 37.56 | 37.81 | 34.04 | 27.47 |
| 9144 | 37.07 | 37.5  | 37.75 | 33.98 | 27.43 |
| 9146 | 37.09 | 37.51 | 37.75 | 33.99 | 27.47 |
| 9148 | 37.05 | 37.48 | 37.71 | 33.97 | 27.44 |
| 9150 | 37    | 37.41 | 37.64 | 33.9  | 27.4  |
| 9152 | 36.98 | 37.39 | 37.61 | 33.86 | 27.37 |
| 9154 | 36.97 | 37.38 | 37.6  | 33.86 | 27.39 |
| 9156 | 36.99 | 37.39 | 37.61 | 33.87 | 27.43 |
| 9158 | 36.96 | 37.35 | 37.57 | 33.83 | 27.4  |
| 9160 | 36.93 | 37.32 | 37.53 | 33.83 | 27.39 |
| 9162 | 36.93 | 37.3  | 37.51 | 33.81 | 27.38 |
| 9164 | 36.91 | 37.27 | 37.48 | 33.79 | 27.38 |
| 9166 | 36.87 | 37.23 | 37.44 | 33.75 | 27.35 |
| 9168 | 36.88 | 37.23 | 37.43 | 33.74 | 27.35 |
| 9170 | 36.84 | 37.18 | 37.37 | 33.71 | 27.33 |
| 9172 | 36.81 | 37.16 | 37.34 | 33.68 | 27.32 |



|      |       |       |       |       |       |
|------|-------|-------|-------|-------|-------|
| 9174 | 36.8  | 37.14 | 37.32 | 33.65 | 27.32 |
| 9176 | 36.79 | 37.12 | 37.29 | 33.62 | 27.31 |
| 9178 | 36.71 | 37.04 | 37.21 | 33.54 | 27.24 |
| 9180 | 36.72 | 37.05 | 37.21 | 33.55 | 27.27 |
| 9182 | 36.73 | 37.04 | 37.2  | 33.55 | 27.28 |
| 9184 | 36.68 | 36.98 | 37.14 | 33.49 | 27.24 |
| 9186 | 36.65 | 36.96 | 37.11 | 33.47 | 27.22 |
| 9188 | 36.63 | 36.92 | 37.07 | 33.42 | 27.2  |
| 9190 | 36.61 | 36.89 | 37.04 | 33.41 | 27.19 |
| 9192 | 36.59 | 36.86 | 37    | 33.38 | 27.17 |
| 9194 | 36.56 | 36.84 | 36.98 | 33.36 | 27.17 |
| 9196 | 36.54 | 36.81 | 36.94 | 33.34 | 27.15 |
| 9198 | 36.52 | 36.77 | 36.9  | 33.3  | 27.13 |
| 9200 | 36.49 | 36.74 | 36.86 | 33.27 | 27.11 |
| 9202 | 36.47 | 36.72 | 36.84 | 33.25 | 27.1  |
| 9204 | 36.45 | 36.69 | 36.8  | 33.22 | 27.08 |
| 9206 | 36.44 | 36.67 | 36.78 | 33.19 | 27.09 |
| 9208 | 36.42 | 36.64 | 36.75 | 33.17 | 27.08 |
| 9210 | 36.4  | 36.62 | 36.72 | 33.14 | 27.07 |
| 9212 | 36.37 | 36.58 | 36.7  | 33.12 | 27.06 |
| 9214 | 36.35 | 36.56 | 36.65 | 33.09 | 27.04 |
| 9216 | 36.34 | 36.54 | 36.64 | 33.07 | 27.05 |
| 9218 | 36.32 | 36.52 | 36.61 | 33.05 | 27.03 |
| 9220 | 36.31 | 36.5  | 36.59 | 33.03 | 27.02 |
| 9222 | 36.28 | 36.47 | 36.55 | 33    | 27.01 |
| 9224 | 36.27 | 36.45 | 36.53 | 33    | 27    |
| 9226 | 36.26 | 36.42 | 36.5  | 32.97 | 26.99 |
| 9228 | 36.23 | 36.38 | 36.44 | 32.93 | 26.96 |
| 9230 | 36.21 | 36.37 | 36.43 | 32.92 | 26.96 |
| 9232 | 36.24 | 36.39 | 36.45 | 32.94 | 26.99 |
| 9234 | 36.18 | 36.33 | 36.39 | 32.89 | 26.95 |
| 9236 | 36.15 | 36.27 | 36.34 | 32.85 | 26.92 |
| 9238 | 36.12 | 36.25 | 36.31 | 32.81 | 26.91 |
| 9240 | 36.12 | 36.24 | 36.3  | 32.8  | 26.92 |
| 9242 | 36.1  | 36.22 | 36.27 | 32.78 | 26.91 |
| 9244 | 36.05 | 36.18 | 36.22 | 32.74 | 26.88 |
| 9246 | 36.06 | 36.16 | 36.2  | 32.73 | 26.88 |
| 9248 | 36.05 | 36.15 | 36.18 | 32.71 | 26.88 |
| 9250 | 36.06 | 36.17 | 36.18 | 32.72 | 26.9  |
| 9252 | 36.01 | 36.11 | 36.13 | 32.68 | 26.87 |
| 9254 | 35.99 | 36.08 | 36.1  | 32.65 | 26.85 |
| 9256 | 36    | 36.09 | 36.1  | 32.67 | 26.88 |
| 9258 | 35.97 | 36.05 | 36.06 | 32.63 | 26.86 |
| 9260 | 35.97 | 36.04 | 36.04 | 32.61 | 26.85 |

|      |       |       |       |       |       |
|------|-------|-------|-------|-------|-------|
| 9262 | 35.92 | 36    | 36    | 32.59 | 26.82 |
| 9264 | 35.91 | 35.97 | 35.97 | 32.56 | 26.82 |
| 9266 | 35.92 | 35.96 | 35.97 | 32.57 | 26.83 |
| 9268 | 35.92 | 35.97 | 35.97 | 32.57 | 26.85 |
| 9270 | 35.9  | 35.95 | 35.95 | 32.55 | 26.83 |
| 9272 | 35.88 | 35.92 | 35.91 | 32.53 | 26.82 |
| 9274 | 35.87 | 35.9  | 35.89 | 32.5  | 26.81 |
| 9276 | 35.85 | 35.88 | 35.86 | 32.48 | 26.8  |
| 9278 | 35.83 | 35.85 | 35.83 | 32.46 | 26.8  |
| 9280 | 35.81 | 35.83 | 35.8  | 32.44 | 26.78 |
| 9282 | 35.8  | 35.8  | 35.78 | 32.42 | 26.77 |
| 9284 | 35.75 | 35.76 | 35.73 | 32.37 | 26.73 |
| 9286 | 35.71 | 35.72 | 35.67 | 32.33 | 26.7  |
| 9288 | 35.69 | 35.69 | 35.65 | 32.3  | 26.68 |
| 9290 | 35.69 | 35.68 | 35.65 | 32.31 | 26.71 |
| 9292 | 35.67 | 35.66 | 35.61 | 32.28 | 26.69 |
| 9294 | 35.64 | 35.63 | 35.57 | 32.25 | 26.69 |
| 9296 | 35.6  | 35.59 | 35.54 | 32.21 | 26.65 |
| 9298 | 35.58 | 35.55 | 35.5  | 32.18 | 26.62 |
| 9300 | 35.57 | 35.53 | 35.47 | 32.15 | 26.63 |
| 9302 | 35.57 | 35.54 | 35.47 | 32.15 | 26.64 |
| 9304 | 35.53 | 35.49 | 35.43 | 32.11 | 26.61 |
| 9306 | 35.5  | 35.46 | 35.4  | 32.09 | 26.59 |
| 9308 | 35.49 | 35.44 | 35.37 | 32.07 | 26.59 |
| 9310 | 35.51 | 35.45 | 35.37 | 32.1  | 26.63 |
| 9312 | 35.49 | 35.44 | 35.35 | 32.05 | 26.6  |
| 9314 | 35.46 | 35.39 | 35.31 | 32.03 | 26.56 |
| 9316 | 35.41 | 35.34 | 35.25 | 31.97 | 26.53 |
| 9318 | 35.41 | 35.33 | 35.24 | 31.97 | 26.53 |
| 9320 | 35.4  | 35.31 | 35.22 | 31.96 | 26.53 |
| 9322 | 35.38 | 35.29 | 35.2  | 31.95 | 26.52 |
| 9324 | 35.37 | 35.27 | 35.17 | 31.92 | 26.51 |
| 9326 | 35.35 | 35.24 | 35.14 | 31.91 | 26.5  |
| 9328 | 35.32 | 35.22 | 35.11 | 31.87 | 26.48 |
| 9330 | 35.31 | 35.18 | 35.08 | 31.85 | 26.47 |
| 9332 | 35.29 | 35.16 | 35.05 | 31.83 | 26.46 |
| 9334 | 35.27 | 35.14 | 35.03 | 31.81 | 26.46 |
| 9336 | 35.26 | 35.13 | 35.02 | 31.81 | 26.46 |
| 9338 | 35.24 | 35.1  | 34.98 | 31.77 | 26.44 |
| 9340 | 35.21 | 35.06 | 34.93 | 31.73 | 26.4  |
| 9342 | 35.21 | 35.07 | 34.94 | 31.74 | 26.43 |
| 9344 | 35.23 | 35.09 | 34.96 | 31.77 | 26.46 |
| 9346 | 35.18 | 35.03 | 34.9  | 31.71 | 26.42 |
| 9348 | 35.17 | 35.01 | 34.88 | 31.69 | 26.41 |

|      |       |       |       |       |       |
|------|-------|-------|-------|-------|-------|
| 9350 | 35.18 | 35.01 | 34.88 | 31.7  | 26.43 |
| 9352 | 35.16 | 34.99 | 34.86 | 31.68 | 26.41 |
| 9354 | 35.15 | 34.99 | 34.84 | 31.67 | 26.42 |
| 9356 | 35.15 | 34.97 | 34.82 | 31.67 | 26.43 |
| 9358 | 35.1  | 34.92 | 34.77 | 31.62 | 26.41 |
| 9360 | 35.09 | 34.89 | 34.73 | 31.58 | 26.37 |
| 9362 | 35.09 | 34.9  | 34.74 | 31.6  | 26.39 |
| 9364 | 35.04 | 34.84 | 34.69 | 31.56 | 26.36 |
| 9366 | 35.03 | 34.82 | 34.67 | 31.54 | 26.35 |
| 9368 | 35.04 | 34.84 | 34.68 | 31.55 | 26.37 |
| 9370 | 35.01 | 34.8  | 34.65 | 31.52 | 26.36 |
| 9372 | 35.01 | 34.79 | 34.63 | 31.51 | 26.35 |
| 9374 | 35    | 34.78 | 34.6  | 31.49 | 26.34 |
| 9376 | 34.94 | 34.71 | 34.54 | 31.43 | 26.29 |
| 9378 | 34.93 | 34.7  | 34.52 | 31.43 | 26.29 |
| 9380 | 34.91 | 34.68 | 34.51 | 31.41 | 26.3  |
| 9382 | 34.88 | 34.66 | 34.47 | 31.38 | 26.27 |
| 9384 | 34.88 | 34.65 | 34.46 | 31.37 | 26.28 |
| 9386 | 34.87 | 34.64 | 34.45 | 31.36 | 26.28 |
| 9388 | 34.85 | 34.6  | 34.41 | 31.34 | 26.27 |
| 9390 | 34.81 | 34.56 | 34.36 | 31.28 | 26.22 |
| 9392 | 34.78 | 34.52 | 34.32 | 31.25 | 26.2  |
| 9394 | 34.78 | 34.53 | 34.32 | 31.25 | 26.23 |
| 9396 | 34.74 | 34.48 | 34.29 | 31.21 | 26.2  |
| 9398 | 34.73 | 34.47 | 34.26 | 31.19 | 26.18 |
| 9400 | 34.72 | 34.46 | 34.24 | 31.17 | 26.18 |
| 9402 | 34.72 | 34.44 | 34.23 | 31.17 | 26.19 |
| 9404 | 34.69 | 34.42 | 34.21 | 31.15 | 26.18 |
| 9406 | 34.67 | 34.39 | 34.16 | 31.12 | 26.15 |
| 9408 | 34.67 | 34.38 | 34.17 | 31.13 | 26.16 |
| 9410 | 34.67 | 34.37 | 34.15 | 31.13 | 26.18 |
| 9412 | 34.65 | 34.35 | 34.13 | 31.11 | 26.16 |
| 9414 | 34.62 | 34.33 | 34.1  | 31.09 | 26.15 |
| 9416 | 34.6  | 34.3  | 34.07 | 31.06 | 26.13 |
| 9418 | 34.6  | 34.29 | 34.06 | 31.05 | 26.12 |
| 9420 | 34.55 | 34.23 | 34    | 31.01 | 26.09 |
| 9422 | 34.54 | 34.23 | 33.97 | 30.98 | 26.08 |
| 9424 | 34.5  | 34.19 | 33.94 | 30.95 | 26.06 |
| 9426 | 34.5  | 34.18 | 33.92 | 30.93 | 26.06 |
| 9428 | 34.52 | 34.2  | 33.95 | 30.96 | 26.1  |
| 9430 | 34.51 | 34.18 | 33.93 | 30.96 | 26.1  |
| 9432 | 34.49 | 34.16 | 33.9  | 30.91 | 26.07 |
| 9434 | 34.46 | 34.12 | 33.86 | 30.88 | 26.06 |
| 9436 | 34.46 | 34.12 | 33.86 | 30.89 | 26.08 |

|      |       |       |       |       |       |
|------|-------|-------|-------|-------|-------|
| 9438 | 34.45 | 34.11 | 33.85 | 30.88 | 26.07 |
| 9440 | 34.41 | 34.07 | 33.81 | 30.85 | 26.04 |
| 9442 | 34.42 | 34.07 | 33.8  | 30.85 | 26.05 |
| 9444 | 34.38 | 34.03 | 33.74 | 30.81 | 26.01 |
| 9446 | 34.36 | 34    | 33.72 | 30.8  | 26.01 |
| 9448 | 34.32 | 33.95 | 33.67 | 30.75 | 25.97 |
| 9450 | 34.3  | 33.93 | 33.65 | 30.73 | 25.96 |
| 9452 | 34.28 | 33.9  | 33.63 | 30.71 | 25.95 |
| 9454 | 34.26 | 33.87 | 33.58 | 30.67 | 25.93 |
| 9456 | 34.24 | 33.86 | 33.56 | 30.66 | 25.93 |
| 9458 | 34.21 | 33.83 | 33.53 | 30.62 | 25.91 |
| 9460 | 34.19 | 33.79 | 33.49 | 30.59 | 25.88 |
| 9462 | 34.18 | 33.78 | 33.49 | 30.59 | 25.89 |
| 9464 | 34.17 | 33.77 | 33.48 | 30.59 | 25.9  |
| 9466 | 34.18 | 33.77 | 33.46 | 30.57 | 25.89 |
| 9468 | 34.16 | 33.75 | 33.44 | 30.55 | 25.89 |
| 9470 | 34.14 | 33.73 | 33.43 | 30.54 | 25.88 |
| 9472 | 34.12 | 33.69 | 33.38 | 30.51 | 25.86 |
| 9474 | 34.11 | 33.67 | 33.37 | 30.51 | 25.86 |
| 9476 | 34.09 | 33.66 | 33.35 | 30.49 | 25.85 |
| 9478 | 34.04 | 33.59 | 33.27 | 30.43 | 25.8  |
| 9480 | 34.05 | 33.6  | 33.29 | 30.44 | 25.82 |
| 9482 | 34.04 | 33.58 | 33.26 | 30.42 | 25.81 |
| 9484 | 34.03 | 33.57 | 33.25 | 30.42 | 25.81 |
| 9486 | 34.03 | 33.56 | 33.23 | 30.4  | 25.8  |
| 9488 | 34.01 | 33.54 | 33.21 | 30.38 | 25.8  |
| 9490 | 34    | 33.52 | 33.19 | 30.36 | 25.8  |
| 9492 | 33.99 | 33.51 | 33.18 | 30.36 | 25.8  |
| 9494 | 33.98 | 33.5  | 33.15 | 30.34 | 25.8  |
| 9496 | 33.96 | 33.47 | 33.14 | 30.32 | 25.78 |
| 9498 | 33.94 | 33.46 | 33.11 | 30.3  | 25.77 |
| 9500 | 33.92 | 33.44 | 33.09 | 30.28 | 25.77 |
| 9502 | 33.91 | 33.42 | 33.06 | 30.27 | 25.77 |
| 9504 | 33.89 | 33.41 | 33.05 | 30.26 | 25.76 |
| 9506 | 33.84 | 33.35 | 33    | 30.23 | 25.73 |
| 9508 | 33.86 | 33.36 | 33    | 30.23 | 25.73 |
| 9510 | 33.85 | 33.34 | 32.99 | 30.22 | 25.73 |
| 9512 | 33.81 | 33.29 | 32.94 | 30.18 | 25.7  |
| 9514 | 33.81 | 33.3  | 32.94 | 30.18 | 25.72 |
| 9516 | 33.79 | 33.27 | 32.92 | 30.17 | 25.71 |
| 9518 | 33.78 | 33.26 | 32.88 | 30.13 | 25.7  |
| 9520 | 33.74 | 33.22 | 32.85 | 30.12 | 25.68 |
| 9522 | 33.76 | 33.22 | 32.85 | 30.11 | 25.68 |
| 9524 | 33.74 | 33.21 | 32.83 | 30.09 | 25.68 |

|      |       |       |       |       |       |
|------|-------|-------|-------|-------|-------|
| 9526 | 33.69 | 33.17 | 32.79 | 30.04 | 25.66 |
| 9528 | 33.66 | 33.13 | 32.75 | 30.01 | 25.63 |
| 9530 | 33.62 | 33.09 | 32.72 | 29.98 | 25.59 |
| 9532 | 33.62 | 33.1  | 32.72 | 29.99 | 25.62 |
| 9534 | 33.62 | 33.07 | 32.69 | 29.96 | 25.61 |
| 9536 | 33.62 | 33.07 | 32.68 | 29.96 | 25.62 |
| 9538 | 33.6  | 33.05 | 32.67 | 29.95 | 25.6  |
| 9540 | 33.6  | 33.04 | 32.66 | 29.94 | 25.59 |
| 9542 | 33.57 | 33.01 | 32.62 | 29.91 | 25.56 |
| 9544 | 33.56 | 33    | 32.6  | 29.9  | 25.56 |
| 9546 | 33.54 | 32.97 | 32.59 | 29.89 | 25.55 |
| 9548 | 33.52 | 32.95 | 32.54 | 29.86 | 25.55 |
| 9550 | 33.53 | 32.94 | 32.55 | 29.87 | 25.56 |
| 9552 | 33.51 | 32.93 | 32.53 | 29.87 | 25.56 |
| 9554 | 33.51 | 32.93 | 32.53 | 29.86 | 25.57 |
| 9556 | 33.47 | 32.89 | 32.48 | 29.81 | 25.52 |
| 9558 | 33.46 | 32.87 | 32.47 | 29.79 | 25.52 |
| 9560 | 33.44 | 32.85 | 32.45 | 29.79 | 25.52 |
| 9562 | 33.39 | 32.81 | 32.41 | 29.75 | 25.49 |
| 9564 | 33.38 | 32.78 | 32.37 | 29.72 | 25.47 |
| 9566 | 33.37 | 32.79 | 32.37 | 29.72 | 25.48 |
| 9568 | 33.37 | 32.77 | 32.35 | 29.7  | 25.47 |
| 9570 | 33.34 | 32.74 | 32.33 | 29.7  | 25.47 |
| 9572 | 33.33 | 32.73 | 32.31 | 29.67 | 25.45 |
| 9574 | 33.3  | 32.69 | 32.28 | 29.64 | 25.44 |
| 9576 | 33.28 | 32.67 | 32.26 | 29.62 | 25.43 |
| 9578 | 33.27 | 32.66 | 32.24 | 29.62 | 25.43 |
| 9580 | 33.25 | 32.65 | 32.22 | 29.59 | 25.42 |
| 9582 | 33.24 | 32.63 | 32.2  | 29.58 | 25.41 |
| 9584 | 33.23 | 32.61 | 32.18 | 29.57 | 25.4  |
| 9586 | 33.22 | 32.59 | 32.16 | 29.54 | 25.4  |
| 9588 | 33.19 | 32.58 | 32.15 | 29.53 | 25.39 |
| 9590 | 33.18 | 32.55 | 32.11 | 29.5  | 25.37 |
| 9592 | 33.17 | 32.55 | 32.11 | 29.5  | 25.38 |
| 9594 | 33.15 | 32.52 | 32.08 | 29.47 | 25.35 |
| 9596 | 33.13 | 32.51 | 32.06 | 29.46 | 25.35 |
| 9598 | 33.13 | 32.5  | 32.06 | 29.46 | 25.36 |
| 9600 | 33.13 | 32.49 | 32.05 | 29.45 | 25.35 |
| 9602 | 33.11 | 32.47 | 32.03 | 29.43 | 25.36 |
| 9604 | 33.1  | 32.46 | 32.01 | 29.42 | 25.35 |
| 9606 | 33.07 | 32.44 | 31.99 | 29.4  | 25.35 |
| 9608 | 33.07 | 32.44 | 31.98 | 29.39 | 25.36 |
| 9610 | 33.09 | 32.45 | 32    | 29.41 | 25.38 |
| 9612 | 33.04 | 32.41 | 31.95 | 29.37 | 25.34 |

|      |       |       |       |       |       |
|------|-------|-------|-------|-------|-------|
| 9614 | 33.03 | 32.39 | 31.93 | 29.36 | 25.34 |
| 9616 | 32.99 | 32.35 | 31.89 | 29.33 | 25.31 |
| 9618 | 33.03 | 32.37 | 31.91 | 29.36 | 25.33 |
| 9620 | 33.02 | 32.37 | 31.91 | 29.35 | 25.34 |
| 9622 | 33.01 | 32.35 | 31.89 | 29.34 | 25.34 |
| 9624 | 32.99 | 32.33 | 31.87 | 29.31 | 25.33 |
| 9626 | 32.98 | 32.32 | 31.85 | 29.31 | 25.32 |
| 9628 | 32.96 | 32.31 | 31.83 | 29.29 | 25.32 |
| 9630 | 32.92 | 32.27 | 31.79 | 29.27 | 25.3  |
| 9632 | 32.9  | 32.24 | 31.77 | 29.23 | 25.29 |
| 9634 | 32.9  | 32.24 | 31.77 | 29.23 | 25.29 |
| 9636 | 32.86 | 32.2  | 31.71 | 29.18 | 25.25 |
| 9638 | 32.87 | 32.21 | 31.73 | 29.2  | 25.27 |
| 9640 | 32.87 | 32.2  | 31.72 | 29.19 | 25.28 |
| 9642 | 32.86 | 32.18 | 31.7  | 29.18 | 25.27 |
| 9644 | 32.84 | 32.16 | 31.67 | 29.16 | 25.25 |
| 9646 | 32.84 | 32.16 | 31.67 | 29.16 | 25.26 |
| 9648 | 32.84 | 32.15 | 31.66 | 29.16 | 25.26 |
| 9650 | 32.81 | 32.13 | 31.63 | 29.13 | 25.25 |
| 9652 | 32.75 | 32.06 | 31.57 | 29.08 | 25.21 |
| 9654 | 32.77 | 32.07 | 31.58 | 29.09 | 25.22 |
| 9656 | 32.75 | 32.05 | 31.56 | 29.07 | 25.2  |
| 9658 | 32.73 | 32.03 | 31.55 | 29.06 | 25.2  |
| 9660 | 32.72 | 32.03 | 31.53 | 29.04 | 25.21 |
| 9662 | 32.72 | 32.02 | 31.52 | 29.04 | 25.22 |
| 9664 | 32.7  | 32.01 | 31.5  | 29.01 | 25.2  |
| 9666 | 32.69 | 31.99 | 31.49 | 29.01 | 25.2  |
| 9668 | 32.69 | 31.98 | 31.49 | 29.01 | 25.21 |
| 9670 | 32.66 | 31.96 | 31.44 | 28.98 | 25.19 |
| 9672 | 32.64 | 31.94 | 31.42 | 28.96 | 25.18 |
| 9674 | 32.63 | 31.92 | 31.41 | 28.95 | 25.17 |
| 9676 | 32.62 | 31.91 | 31.4  | 28.95 | 25.16 |
| 9678 | 32.61 | 31.89 | 31.38 | 28.94 | 25.15 |
| 9680 | 32.6  | 31.88 | 31.36 | 28.92 | 25.15 |
| 9682 | 32.62 | 31.88 | 31.37 | 28.94 | 25.17 |
| 9684 | 32.57 | 31.84 | 31.34 | 28.9  | 25.14 |
| 9686 | 32.56 | 31.83 | 31.31 | 28.88 | 25.14 |
| 9688 | 32.52 | 31.79 | 31.27 | 28.83 | 25.12 |
| 9690 | 32.51 | 31.78 | 31.26 | 28.82 | 25.12 |
| 9692 | 32.48 | 31.77 | 31.25 | 28.81 | 25.1  |
| 9694 | 32.49 | 31.77 | 31.24 | 28.81 | 25.1  |
| 9696 | 32.48 | 31.75 | 31.22 | 28.8  | 25.1  |
| 9698 | 32.47 | 31.74 | 31.21 | 28.79 | 25.1  |
| 9700 | 32.46 | 31.73 | 31.2  | 28.79 | 25.11 |

|      |       |       |       |       |       |
|------|-------|-------|-------|-------|-------|
| 9702 | 32.45 | 31.71 | 31.18 | 28.77 | 25.09 |
| 9704 | 32.43 | 31.69 | 31.15 | 28.75 | 25.08 |
| 9706 | 32.47 | 31.72 | 31.17 | 28.78 | 25.11 |
| 9708 | 32.41 | 31.67 | 31.12 | 28.74 | 25.07 |
| 9710 | 32.38 | 31.64 | 31.11 | 28.72 | 25.06 |
| 9712 | 32.37 | 31.63 | 31.08 | 28.7  | 25.05 |
| 9714 | 32.36 | 31.61 | 31.07 | 28.7  | 25.05 |
| 9716 | 32.34 | 31.59 | 31.05 | 28.68 | 25.04 |
| 9718 | 32.33 | 31.58 | 31.04 | 28.66 | 25.04 |
| 9720 | 32.31 | 31.56 | 31.02 | 28.64 | 25.02 |
| 9722 | 32.28 | 31.54 | 30.99 | 28.62 | 25.02 |
| 9724 | 32.26 | 31.51 | 30.96 | 28.59 | 25.01 |
| 9726 | 32.27 | 31.51 | 30.97 | 28.59 | 25.01 |
| 9728 | 32.26 | 31.5  | 30.95 | 28.58 | 25    |
| 9730 | 32.23 | 31.47 | 30.92 | 28.56 | 24.98 |
| 9732 | 32.22 | 31.45 | 30.89 | 28.54 | 24.98 |
| 9734 | 32.22 | 31.45 | 30.9  | 28.55 | 24.99 |
| 9736 | 32.2  | 31.42 | 30.88 | 28.54 | 24.97 |
| 9738 | 32.21 | 31.44 | 30.89 | 28.56 | 25    |
| 9740 | 32.19 | 31.42 | 30.87 | 28.54 | 24.99 |
| 9742 | 32.18 | 31.4  | 30.85 | 28.53 | 24.99 |
| 9744 | 32.15 | 31.35 | 30.8  | 28.48 | 24.94 |
| 9746 | 32.15 | 31.36 | 30.8  | 28.48 | 24.95 |
| 9748 | 32.13 | 31.35 | 30.79 | 28.48 | 24.95 |
| 9750 | 32.12 | 31.33 | 30.78 | 28.46 | 24.94 |
| 9752 | 32.1  | 31.32 | 30.75 | 28.42 | 24.94 |
| 9754 | 32.08 | 31.31 | 30.73 | 28.4  | 24.91 |
| 9756 | 32.06 | 31.28 | 30.71 | 28.39 | 24.92 |
| 9758 | 32.05 | 31.26 | 30.69 | 28.38 | 24.91 |
| 9760 | 32.05 | 31.26 | 30.69 | 28.39 | 24.91 |
| 9762 | 32.02 | 31.23 | 30.66 | 28.36 | 24.9  |
| 9764 | 32.01 | 31.22 | 30.63 | 28.34 | 24.87 |
| 9766 | 32.01 | 31.21 | 30.64 | 28.35 | 24.9  |
| 9768 | 32    | 31.19 | 30.62 | 28.35 | 24.89 |
| 9770 | 31.99 | 31.19 | 30.61 | 28.34 | 24.88 |
| 9772 | 31.98 | 31.18 | 30.6  | 28.33 | 24.88 |
| 9774 | 31.97 | 31.15 | 30.58 | 28.31 | 24.87 |
| 9776 | 31.92 | 31.12 | 30.54 | 28.28 | 24.84 |
| 9778 | 31.89 | 31.07 | 30.5  | 28.24 | 24.8  |
| 9780 | 31.9  | 31.09 | 30.51 | 28.25 | 24.82 |
| 9782 | 31.9  | 31.08 | 30.5  | 28.25 | 24.84 |
| 9784 | 31.88 | 31.08 | 30.5  | 28.23 | 24.84 |
| 9786 | 31.86 | 31.05 | 30.46 | 28.2  | 24.81 |
| 9788 | 31.84 | 31.03 | 30.44 | 28.17 | 24.8  |

|      |       |       |       |       |       |
|------|-------|-------|-------|-------|-------|
| 9790 | 31.83 | 31.01 | 30.42 | 28.17 | 24.8  |
| 9792 | 31.81 | 30.99 | 30.39 | 28.14 | 24.77 |
| 9794 | 31.79 | 30.96 | 30.37 | 28.14 | 24.78 |
| 9796 | 31.77 | 30.94 | 30.36 | 28.12 | 24.75 |
| 9798 | 31.77 | 30.95 | 30.35 | 28.12 | 24.76 |
| 9800 | 31.76 | 30.93 | 30.33 | 28.09 | 24.75 |
| 9802 | 31.75 | 30.91 | 30.32 | 28.09 | 24.75 |
| 9804 | 31.76 | 30.91 | 30.31 | 28.09 | 24.75 |
| 9806 | 31.74 | 30.91 | 30.31 | 28.1  | 24.77 |
| 9808 | 31.7  | 30.86 | 30.26 | 28.06 | 24.72 |
| 9810 | 31.74 | 30.9  | 30.29 | 28.09 | 24.76 |
| 9812 | 31.7  | 30.87 | 30.26 | 28.06 | 24.74 |
| 9814 | 31.7  | 30.86 | 30.25 | 28.05 | 24.75 |
| 9816 | 31.71 | 30.85 | 30.26 | 28.05 | 24.75 |
| 9818 | 31.69 | 30.84 | 30.24 | 28.04 | 24.74 |
| 9820 | 31.67 | 30.82 | 30.21 | 28.01 | 24.73 |
| 9822 | 31.66 | 30.82 | 30.21 | 28.01 | 24.74 |
| 9824 | 31.63 | 30.79 | 30.17 | 27.97 | 24.71 |
| 9826 | 31.62 | 30.79 | 30.17 | 27.97 | 24.72 |
| 9828 | 31.62 | 30.78 | 30.17 | 27.98 | 24.72 |
| 9830 | 31.61 | 30.76 | 30.15 | 27.96 | 24.72 |
| 9832 | 31.58 | 30.74 | 30.12 | 27.92 | 24.69 |
| 9834 | 31.58 | 30.74 | 30.12 | 27.93 | 24.71 |
| 9836 | 31.53 | 30.69 | 30.07 | 27.89 | 24.66 |
| 9838 | 31.52 | 30.67 | 30.06 | 27.87 | 24.66 |
| 9840 | 31.5  | 30.65 | 30.03 | 27.85 | 24.63 |
| 9842 | 31.5  | 30.65 | 30.05 | 27.87 | 24.66 |
| 9844 | 31.52 | 30.67 | 30.04 | 27.88 | 24.68 |
| 9846 | 31.46 | 30.6  | 30    | 27.83 | 24.63 |
| 9848 | 31.48 | 30.63 | 30    | 27.84 | 24.65 |
| 9850 | 31.49 | 30.62 | 30    | 27.84 | 24.65 |
| 9852 | 31.46 | 30.62 | 29.99 | 27.83 | 24.65 |
| 9854 | 31.44 | 30.56 | 29.94 | 27.78 | 24.61 |
| 9856 | 31.42 | 30.55 | 29.92 | 27.77 | 24.6  |
| 9858 | 31.39 | 30.52 | 29.88 | 27.75 | 24.58 |
| 9860 | 31.37 | 30.5  | 29.87 | 27.73 | 24.58 |
| 9862 | 31.37 | 30.48 | 29.85 | 27.73 | 24.57 |
| 9864 | 31.39 | 30.51 | 29.88 | 27.77 | 24.6  |
| 9866 | 31.4  | 30.51 | 29.88 | 27.78 | 24.61 |
| 9868 | 31.34 | 30.46 | 29.82 | 27.71 | 24.56 |
| 9870 | 31.33 | 30.45 | 29.81 | 27.7  | 24.57 |
| 9872 | 31.32 | 30.43 | 29.79 | 27.68 | 24.55 |
| 9874 | 31.33 | 30.44 | 29.79 | 27.68 | 24.55 |
| 9876 | 31.31 | 30.42 | 29.78 | 27.69 | 24.55 |



|      |       |       |       |       |       |
|------|-------|-------|-------|-------|-------|
| 9878 | 31.29 | 30.39 | 29.77 | 27.67 | 24.55 |
| 9880 | 31.27 | 30.38 | 29.74 | 27.64 | 24.53 |
| 9882 | 31.23 | 30.34 | 29.71 | 27.6  | 24.52 |
| 9884 | 31.24 | 30.34 | 29.69 | 27.59 | 24.51 |
| 9886 | 31.2  | 30.32 | 29.67 | 27.58 | 24.49 |
| 9888 | 31.24 | 30.34 | 29.68 | 27.58 | 24.51 |
| 9890 | 31.22 | 30.32 | 29.66 | 27.59 | 24.51 |
| 9892 | 31.15 | 30.25 | 29.6  | 27.52 | 24.45 |
| 9894 | 31.16 | 30.26 | 29.61 | 27.54 | 24.47 |
| 9896 | 31.14 | 30.25 | 29.58 | 27.52 | 24.46 |
| 9898 | 31.16 | 30.25 | 29.59 | 27.53 | 24.48 |
| 9900 | 31.14 | 30.24 | 29.58 | 27.52 | 24.48 |
| 9902 | 31.13 | 30.23 | 29.57 | 27.5  | 24.47 |
| 9904 | 31.11 | 30.21 | 29.54 | 27.48 | 24.44 |
| 9906 | 31.11 | 30.2  | 29.53 | 27.49 | 24.45 |
| 9908 | 31.1  | 30.19 | 29.53 | 27.48 | 24.45 |
| 9910 | 31.14 | 30.22 | 29.56 | 27.51 | 24.49 |
| 9912 | 31.12 | 30.21 | 29.55 | 27.52 | 24.5  |
| 9914 | 31.13 | 30.2  | 29.54 | 27.51 | 24.48 |
| 9916 | 31.08 | 30.17 | 29.5  | 27.47 | 24.46 |
| 9918 | 31.1  | 30.19 | 29.52 | 27.49 | 24.49 |
| 9920 | 31.06 | 30.16 | 29.48 | 27.45 | 24.44 |
| 9922 | 31.05 | 30.15 | 29.46 | 27.44 | 24.45 |
| 9924 | 31.02 | 30.08 | 29.42 | 27.4  | 24.42 |
| 9926 | 30.98 | 30.06 | 29.38 | 27.37 | 24.39 |
| 9928 | 30.98 | 30.07 | 29.39 | 27.37 | 24.41 |
| 9930 | 30.97 | 30.05 | 29.37 | 27.35 | 24.4  |
| 9932 | 30.97 | 30.03 | 29.36 | 27.35 | 24.39 |
| 9934 | 30.97 | 30.04 | 29.36 | 27.34 | 24.4  |
| 9936 | 30.98 | 30.05 | 29.36 | 27.36 | 24.42 |
| 9938 | 30.96 | 30.04 | 29.36 | 27.34 | 24.4  |
| 9940 | 30.93 | 30    | 29.32 | 27.32 | 24.38 |
| 9942 | 30.92 | 29.98 | 29.3  | 27.31 | 24.37 |
| 9944 | 30.93 | 30    | 29.31 | 27.33 | 24.38 |
| 9946 | 30.91 | 29.97 | 29.28 | 27.31 | 24.37 |
| 9948 | 30.91 | 29.96 | 29.28 | 27.31 | 24.39 |
| 9950 | 30.9  | 29.95 | 29.26 | 27.29 | 24.37 |
| 9952 | 30.87 | 29.93 | 29.23 | 27.27 | 24.35 |
| 9954 | 30.85 | 29.9  | 29.21 | 27.24 | 24.34 |
| 9956 | 30.83 | 29.89 | 29.19 | 27.23 | 24.34 |
| 9958 | 30.82 | 29.87 | 29.19 | 27.21 | 24.33 |
| 9960 | 30.84 | 29.9  | 29.2  | 27.25 | 24.37 |
| 9962 | 30.86 | 29.92 | 29.22 | 27.24 | 24.37 |
| 9964 | 30.81 | 29.88 | 29.18 | 27.2  | 24.34 |

|       |       |       |       |       |       |
|-------|-------|-------|-------|-------|-------|
| 9966  | 30.78 | 29.84 | 29.14 | 27.18 | 24.33 |
| 9968  | 30.78 | 29.82 | 29.13 | 27.18 | 24.33 |
| 9970  | 30.79 | 29.83 | 29.14 | 27.19 | 24.32 |
| 9972  | 30.77 | 29.81 | 29.11 | 27.19 | 24.33 |
| 9974  | 30.75 | 29.79 | 29.09 | 27.16 | 24.31 |
| 9976  | 30.73 | 29.77 | 29.07 | 27.15 | 24.29 |
| 9978  | 30.74 | 29.77 | 29.07 | 27.15 | 24.32 |
| 9980  | 30.73 | 29.76 | 29.06 | 27.14 | 24.3  |
| 9982  | 30.71 | 29.75 | 29.05 | 27.14 | 24.3  |
| 9984  | 30.7  | 29.73 | 29.06 | 27.12 | 24.3  |
| 9986  | 30.68 | 29.72 | 29.01 | 27.09 | 24.28 |
| 9988  | 30.66 | 29.7  | 29    | 27.07 | 24.26 |
| 9990  | 30.64 | 29.69 | 28.98 | 27.06 | 24.26 |
| 9992  | 30.6  | 29.64 | 28.93 | 27.01 | 24.21 |
| 9994  | 30.61 | 29.65 | 28.94 | 27.02 | 24.23 |
| 9996  | 30.62 | 29.66 | 28.95 | 27.03 | 24.25 |
| 9998  | 30.61 | 29.64 | 28.94 | 27.02 | 24.26 |
| 10000 | 30.6  | 29.63 | 28.93 | 27.02 | 24.25 |
| 10002 | 30.62 | 29.66 | 28.95 | 27.04 | 24.29 |
| 10004 | 30.62 | 29.65 | 28.94 | 27.04 | 24.29 |
| 10006 | 30.61 | 29.64 | 28.93 | 27.05 | 24.29 |
| 10008 | 30.57 | 29.6  | 28.9  | 26.99 | 24.25 |
| 10010 | 30.55 | 29.58 | 28.87 | 26.98 | 24.23 |
| 10012 | 30.54 | 29.59 | 28.88 | 26.98 | 24.25 |
| 10014 | 30.56 | 29.6  | 28.89 | 26.98 | 24.26 |
| 10016 | 30.53 | 29.55 | 28.85 | 26.95 | 24.24 |
| 10018 | 30.51 | 29.55 | 28.84 | 26.95 | 24.23 |
| 10020 | 30.5  | 29.55 | 28.84 | 26.96 | 24.25 |
| 10022 | 30.48 | 29.53 | 28.83 | 26.93 | 24.23 |
| 10024 | 30.49 | 29.54 | 28.83 | 26.94 | 24.23 |
| 10026 | 30.5  | 29.54 | 28.83 | 26.95 | 24.25 |
| 10028 | 30.48 | 29.52 | 28.82 | 26.94 | 24.25 |
| 10030 | 30.46 | 29.49 | 28.78 | 26.91 | 24.23 |
| 10032 | 30.47 | 29.5  | 28.79 | 26.92 | 24.24 |
| 10034 | 30.44 | 29.48 | 28.76 | 26.89 | 24.22 |
| 10036 | 30.41 | 29.44 | 28.72 | 26.86 | 24.19 |
| 10038 | 30.38 | 29.42 | 28.7  | 26.83 | 24.17 |
| 10040 | 30.36 | 29.4  | 28.68 | 26.82 | 24.16 |
| 10042 | 30.38 | 29.39 | 28.68 | 26.82 | 24.17 |
| 10044 | 30.38 | 29.4  | 28.69 | 26.84 | 24.21 |
| 10046 | 30.36 | 29.39 | 28.68 | 26.81 | 24.17 |
| 10048 | 30.33 | 29.35 | 28.64 | 26.79 | 24.15 |
| 10050 | 30.33 | 29.35 | 28.63 | 26.79 | 24.14 |
| 10052 | 30.35 | 29.38 | 28.66 | 26.82 | 24.17 |

|       |       |       |       |       |       |
|-------|-------|-------|-------|-------|-------|
| 10054 | 30.34 | 29.36 | 28.64 | 26.81 | 24.16 |
| 10056 | 30.31 | 29.32 | 28.6  | 26.78 | 24.13 |
| 10058 | 30.29 | 29.32 | 28.61 | 26.79 | 24.15 |
| 10060 | 30.31 | 29.33 | 28.63 | 26.81 | 24.18 |
| 10062 | 30.28 | 29.29 | 28.57 | 26.75 | 24.13 |
| 10064 | 30.28 | 29.28 | 28.57 | 26.76 | 24.14 |
| 10066 | 30.27 | 29.28 | 28.56 | 26.75 | 24.15 |
| 10068 | 30.27 | 29.29 | 28.56 | 26.76 | 24.16 |
| 10070 | 30.26 | 29.27 | 28.55 | 26.73 | 24.15 |
| 10072 | 30.24 | 29.25 | 28.53 | 26.72 | 24.12 |
| 10074 | 30.22 | 29.21 | 28.49 | 26.69 | 24.1  |
| 10076 | 30.2  | 29.21 | 28.49 | 26.69 | 24.13 |
| 10078 | 30.17 | 29.18 | 28.46 | 26.65 | 24.09 |
| 10080 | 30.16 | 29.16 | 28.45 | 26.63 | 24.08 |
| 10082 | 30.15 | 29.15 | 28.43 | 26.62 | 24.08 |
| 10084 | 30.14 | 29.16 | 28.44 | 26.64 | 24.07 |
| 10086 | 30.14 | 29.14 | 28.42 | 26.62 | 24.07 |
| 10088 | 30.12 | 29.12 | 28.41 | 26.61 | 24.06 |
| 10090 | 30.12 | 29.12 | 28.39 | 26.59 | 24.06 |
| 10092 | 30.1  | 29.1  | 28.38 | 26.59 | 24.05 |
| 10094 | 30.1  | 29.09 | 28.37 | 26.58 | 24.05 |
| 10096 | 30.09 | 29.08 | 28.36 | 26.57 | 24.04 |
| 10098 | 30.07 | 29.07 | 28.35 | 26.56 | 24.04 |
| 10100 | 30.06 | 29.06 | 28.34 | 26.56 | 24.05 |
| 10102 | 30.06 | 29.05 | 28.32 | 26.55 | 24.03 |
| 10104 | 30.05 | 29.04 | 28.31 | 26.54 | 24.03 |
| 10106 | 30.04 | 29.03 | 28.29 | 26.53 | 24.02 |
| 10108 | 30    | 28.98 | 28.27 | 26.51 | 24    |
| 10110 | 29.99 | 28.98 | 28.25 | 26.49 | 23.99 |
| 10112 | 29.96 | 28.94 | 28.22 | 26.46 | 23.96 |
| 10114 | 29.95 | 28.93 | 28.2  | 26.45 | 23.95 |
| 10116 | 29.98 | 28.96 | 28.22 | 26.46 | 23.98 |
| 10118 | 29.96 | 28.93 | 28.21 | 26.46 | 23.99 |
| 10120 | 29.93 | 28.91 | 28.18 | 26.45 | 23.98 |
| 10122 | 29.97 | 28.94 | 28.22 | 26.48 | 24    |
| 10124 | 29.95 | 28.92 | 28.21 | 26.46 | 23.99 |
| 10126 | 29.92 | 28.9  | 28.17 | 26.42 | 23.97 |
| 10128 | 29.93 | 28.9  | 28.19 | 26.43 | 23.99 |
| 10130 | 29.88 | 28.85 | 28.13 | 26.39 | 23.95 |
| 10132 | 29.9  | 28.87 | 28.14 | 26.4  | 23.97 |
| 10134 | 29.9  | 28.89 | 28.15 | 26.41 | 23.98 |
| 10136 | 29.89 | 28.87 | 28.14 | 26.4  | 23.98 |
| 10138 | 29.88 | 28.86 | 28.13 | 26.39 | 23.97 |
| 10140 | 29.85 | 28.83 | 28.11 | 26.38 | 23.95 |

|       |       |       |       |       |       |
|-------|-------|-------|-------|-------|-------|
| 10142 | 29.86 | 28.83 | 28.1  | 26.38 | 23.96 |
| 10144 | 29.86 | 28.83 | 28.11 | 26.38 | 23.96 |
| 10146 | 29.84 | 28.82 | 28.1  | 26.37 | 23.96 |
| 10148 | 29.84 | 28.81 | 28.09 | 26.37 | 23.95 |
| 10150 | 29.83 | 28.79 | 28.07 | 26.36 | 23.95 |
| 10152 | 29.83 | 28.8  | 28.08 | 26.36 | 23.96 |
| 10154 | 29.81 | 28.79 | 28.06 | 26.34 | 23.95 |
| 10156 | 29.78 | 28.76 | 28.03 | 26.32 | 23.93 |
| 10158 | 29.79 | 28.75 | 28.02 | 26.31 | 23.94 |
| 10160 | 29.79 | 28.75 | 28.02 | 26.32 | 23.95 |
| 10162 | 29.77 | 28.73 | 28.01 | 26.3  | 23.93 |
| 10164 | 29.75 | 28.72 | 27.99 | 26.29 | 23.93 |
| 10166 | 29.73 | 28.71 | 27.97 | 26.27 | 23.91 |
| 10168 | 29.73 | 28.69 | 27.95 | 26.26 | 23.9  |
| 10170 | 29.73 | 28.7  | 27.97 | 26.28 | 23.91 |
| 10172 | 29.68 | 28.64 | 27.91 | 26.23 | 23.87 |
| 10174 | 29.67 | 28.65 | 27.89 | 26.22 | 23.86 |
| 10176 | 29.65 | 28.62 | 27.88 | 26.2  | 23.85 |
| 10178 | 29.63 | 28.6  | 27.87 | 26.18 | 23.85 |
| 10180 | 29.63 | 28.6  | 27.86 | 26.17 | 23.84 |
| 10182 | 29.61 | 28.59 | 27.86 | 26.17 | 23.86 |
| 10184 | 29.61 | 28.59 | 27.86 | 26.17 | 23.86 |
| 10186 | 29.62 | 28.59 | 27.86 | 26.18 | 23.86 |
| 10188 | 29.58 | 28.56 | 27.82 | 26.14 | 23.83 |
| 10190 | 29.56 | 28.54 | 27.81 | 26.13 | 23.82 |
| 10192 | 29.56 | 28.54 | 27.8  | 26.12 | 23.82 |
| 10194 | 29.56 | 28.54 | 27.8  | 26.13 | 23.84 |
| 10196 | 29.6  | 28.57 | 27.82 | 26.16 | 23.86 |
| 10198 | 29.6  | 28.56 | 27.82 | 26.16 | 23.86 |
| 10200 | 29.59 | 28.56 | 27.82 | 26.17 | 23.88 |
| 10202 | 29.58 | 28.55 | 27.79 | 26.15 | 23.86 |
| 10204 | 29.54 | 28.51 | 27.78 | 26.13 | 23.84 |
| 10206 | 29.51 | 28.48 | 27.75 | 26.08 | 23.8  |
| 10208 | 29.53 | 28.51 | 27.77 | 26.13 | 23.85 |
| 10210 | 29.5  | 28.49 | 27.76 | 26.1  | 23.84 |
| 10212 | 29.52 | 28.5  | 27.76 | 26.1  | 23.85 |
| 10214 | 29.47 | 28.44 | 27.7  | 26.04 | 23.8  |
| 10216 | 29.47 | 28.45 | 27.7  | 26.06 | 23.81 |
| 10218 | 29.49 | 28.47 | 27.72 | 26.06 | 23.81 |
| 10220 | 29.48 | 28.46 | 27.7  | 26.05 | 23.82 |
| 10222 | 29.46 | 28.43 | 27.69 | 26.04 | 23.81 |
| 10224 | 29.47 | 28.44 | 27.7  | 26.07 | 23.84 |
| 10226 | 29.43 | 28.41 | 27.67 | 26.04 | 23.8  |
| 10228 | 29.4  | 28.38 | 27.64 | 26.02 | 23.78 |

|       |       |       |       |       |       |
|-------|-------|-------|-------|-------|-------|
| 10230 | 29.42 | 28.39 | 27.64 | 26.02 | 23.79 |
| 10232 | 29.43 | 28.41 | 27.67 | 26.04 | 23.82 |
| 10234 | 29.41 | 28.38 | 27.64 | 26.03 | 23.8  |
| 10236 | 29.41 | 28.4  | 27.65 | 26.04 | 23.82 |
| 10238 | 29.41 | 28.38 | 27.64 | 26.03 | 23.82 |
| 10240 | 29.38 | 28.35 | 27.62 | 25.98 | 23.79 |
| 10242 | 29.38 | 28.36 | 27.62 | 25.99 | 23.8  |
| 10244 | 29.33 | 28.32 | 27.57 | 25.95 | 23.77 |
| 10246 | 29.36 | 28.34 | 27.6  | 25.98 | 23.8  |
| 10248 | 29.35 | 28.34 | 27.59 | 25.98 | 23.79 |
| 10250 | 29.34 | 28.33 | 27.59 | 25.97 | 23.8  |
| 10252 | 29.29 | 28.28 | 27.53 | 25.92 | 23.75 |
| 10254 | 29.32 | 28.29 | 27.55 | 25.95 | 23.77 |
| 10256 | 29.32 | 28.3  | 27.56 | 25.96 | 23.78 |
| 10258 | 29.31 | 28.29 | 27.55 | 25.96 | 23.78 |
| 10260 | 29.3  | 28.28 | 27.54 | 25.95 | 23.78 |
| 10262 | 29.27 | 28.25 | 27.52 | 25.93 | 23.77 |
| 10264 | 29.27 | 28.24 | 27.5  | 25.92 | 23.76 |
| 10266 | 29.29 | 28.25 | 27.51 | 25.92 | 23.77 |
| 10268 | 29.25 | 28.24 | 27.49 | 25.91 | 23.76 |
| 10270 | 29.25 | 28.23 | 27.49 | 25.9  | 23.76 |
| 10272 | 29.22 | 28.2  | 27.45 | 25.87 | 23.75 |
| 10274 | 29.23 | 28.2  | 27.46 | 25.88 | 23.75 |
| 10276 | 29.22 | 28.21 | 27.45 | 25.88 | 23.75 |
| 10278 | 29.21 | 28.2  | 27.44 | 25.86 | 23.75 |
| 10280 | 29.19 | 28.17 | 27.42 | 25.86 | 23.74 |
| 10282 | 29.19 | 28.17 | 27.42 | 25.85 | 23.74 |
| 10284 | 29.15 | 28.11 | 27.38 | 25.81 | 23.7  |
| 10286 | 29.18 | 28.15 | 27.41 | 25.85 | 23.73 |
| 10288 | 29.17 | 28.14 | 27.39 | 25.84 | 23.72 |
| 10290 | 29.16 | 28.14 | 27.38 | 25.82 | 23.73 |
| 10292 | 29.13 | 28.13 | 27.37 | 25.82 | 23.72 |
| 10294 | 29.1  | 28.08 | 27.34 | 25.79 | 23.69 |
| 10296 | 29.14 | 28.11 | 27.37 | 25.81 | 23.72 |
| 10298 | 29.08 | 28.05 | 27.31 | 25.75 | 23.67 |
| 10300 | 29.06 | 28.06 | 27.3  | 25.75 | 23.67 |
| 10302 | 29.07 | 28.05 | 27.31 | 25.75 | 23.69 |
| 10304 | 29.03 | 28.01 | 27.27 | 25.71 | 23.65 |
| 10306 | 29.07 | 28.06 | 27.31 | 25.77 | 23.7  |
| 10308 | 29.05 | 28.04 | 27.29 | 25.76 | 23.69 |
| 10310 | 29.04 | 28.03 | 27.28 | 25.74 | 23.69 |
| 10312 | 29.03 | 28.02 | 27.26 | 25.73 | 23.67 |
| 10314 | 29.03 | 28.01 | 27.25 | 25.71 | 23.65 |
| 10316 | 29    | 27.98 | 27.22 | 25.7  | 23.63 |

|       |       |       |       |       |       |
|-------|-------|-------|-------|-------|-------|
| 10318 | 29.02 | 28    | 27.25 | 25.73 | 23.67 |
| 10320 | 29    | 27.98 | 27.24 | 25.71 | 23.66 |
| 10322 | 28.98 | 27.96 | 27.22 | 25.7  | 23.65 |
| 10324 | 29    | 27.97 | 27.22 | 25.7  | 23.66 |
| 10326 | 28.97 | 27.96 | 27.22 | 25.71 | 23.66 |
| 10328 | 28.94 | 27.92 | 27.17 | 25.65 | 23.63 |
| 10330 | 28.91 | 27.89 | 27.13 | 25.6  | 23.59 |
| 10332 | 28.91 | 27.89 | 27.14 | 25.61 | 23.6  |
| 10334 | 28.89 | 27.88 | 27.13 | 25.59 | 23.59 |
| 10336 | 28.89 | 27.88 | 27.13 | 25.61 | 23.6  |
| 10338 | 28.89 | 27.88 | 27.12 | 25.61 | 23.6  |
| 10340 | 28.89 | 27.88 | 27.12 | 25.6  | 23.61 |
| 10342 | 28.87 | 27.85 | 27.1  | 25.59 | 23.6  |
| 10344 | 28.88 | 27.85 | 27.1  | 25.59 | 23.6  |
| 10346 | 28.87 | 27.83 | 27.09 | 25.59 | 23.59 |
| 10348 | 28.85 | 27.83 | 27.08 | 25.59 | 23.59 |
| 10350 | 28.87 | 27.84 | 27.1  | 25.62 | 23.61 |
| 10352 | 28.86 | 27.83 | 27.08 | 25.59 | 23.6  |
| 10354 | 28.87 | 27.84 | 27.09 | 25.61 | 23.62 |
| 10356 | 28.86 | 27.82 | 27.08 | 25.6  | 23.62 |
| 10358 | 28.87 | 27.83 | 27.08 | 25.61 | 23.63 |
| 10360 | 28.84 | 27.81 | 27.07 | 25.57 | 23.59 |
| 10362 | 28.83 | 27.79 | 27.06 | 25.57 | 23.61 |
| 10364 | 28.79 | 27.78 | 27.02 | 25.54 | 23.57 |
| 10366 | 28.79 | 27.76 | 27.01 | 25.51 | 23.55 |
| 10368 | 28.77 | 27.75 | 27    | 25.5  | 23.55 |
| 10370 | 28.77 | 27.74 | 26.99 | 25.49 | 23.55 |
| 10372 | 28.78 | 27.77 | 27.01 | 25.52 | 23.58 |
| 10374 | 28.78 | 27.74 | 26.98 | 25.5  | 23.57 |
| 10376 | 28.75 | 27.72 | 26.96 | 25.48 | 23.56 |
| 10378 | 28.77 | 27.74 | 26.99 | 25.51 | 23.59 |
| 10380 | 28.72 | 27.71 | 26.95 | 25.48 | 23.55 |
| 10382 | 28.72 | 27.71 | 26.94 | 25.48 | 23.55 |
| 10384 | 28.7  | 27.68 | 26.92 | 25.46 | 23.54 |
| 10386 | 28.7  | 27.67 | 26.92 | 25.45 | 23.54 |
| 10388 | 28.7  | 27.68 | 26.92 | 25.46 | 23.55 |
| 10390 | 28.69 | 27.67 | 26.91 | 25.45 | 23.54 |
| 10392 | 28.71 | 27.68 | 26.93 | 25.46 | 23.55 |
| 10394 | 28.67 | 27.65 | 26.89 | 25.44 | 23.52 |
| 10396 | 28.68 | 27.66 | 26.89 | 25.44 | 23.53 |
| 10398 | 28.66 | 27.64 | 26.88 | 25.43 | 23.52 |
| 10400 | 28.67 | 27.65 | 26.89 | 25.45 | 23.55 |
| 10402 | 28.64 | 27.63 | 26.87 | 25.43 | 23.54 |
| 10404 | 28.63 | 27.61 | 26.85 | 25.4  | 23.52 |

|       |       |       |       |       |       |
|-------|-------|-------|-------|-------|-------|
| 10406 | 28.61 | 27.59 | 26.84 | 25.4  | 23.51 |
| 10408 | 28.61 | 27.59 | 26.82 | 25.39 | 23.51 |
| 10410 | 28.6  | 27.58 | 26.82 | 25.39 | 23.5  |
| 10412 | 28.6  | 27.57 | 26.81 | 25.39 | 23.5  |
| 10414 | 28.58 | 27.55 | 26.81 | 25.39 | 23.5  |
| 10416 | 28.57 | 27.55 | 26.8  | 25.38 | 23.49 |
| 10418 | 28.58 | 27.54 | 26.79 | 25.37 | 23.5  |
| 10420 | 28.57 | 27.54 | 26.79 | 25.37 | 23.49 |
| 10422 | 28.56 | 27.53 | 26.78 | 25.36 | 23.5  |
| 10424 | 28.59 | 27.58 | 26.83 | 25.4  | 23.53 |
| 10426 | 28.55 | 27.55 | 26.8  | 25.37 | 23.51 |
| 10428 | 28.52 | 27.51 | 26.76 | 25.33 | 23.49 |
| 10430 | 28.5  | 27.5  | 26.73 | 25.32 | 23.47 |
| 10432 | 28.51 | 27.49 | 26.74 | 25.33 | 23.48 |
| 10434 | 28.5  | 27.49 | 26.73 | 25.32 | 23.47 |
| 10436 | 28.45 | 27.42 | 26.66 | 25.26 | 23.41 |
| 10438 | 28.45 | 27.43 | 26.67 | 25.26 | 23.43 |
| 10440 | 28.48 | 27.45 | 26.69 | 25.29 | 23.46 |
| 10442 | 28.47 | 27.44 | 26.68 | 25.29 | 23.45 |
| 10444 | 28.46 | 27.43 | 26.68 | 25.3  | 23.44 |
| 10446 | 28.46 | 27.44 | 26.68 | 25.3  | 23.46 |
| 10448 | 28.43 | 27.41 | 26.65 | 25.27 | 23.44 |
| 10450 | 28.43 | 27.41 | 26.65 | 25.26 | 23.43 |
| 10452 | 28.42 | 27.4  | 26.64 | 25.26 | 23.43 |
| 10454 | 28.43 | 27.41 | 26.65 | 25.28 | 23.45 |
| 10456 | 28.41 | 27.41 | 26.65 | 25.27 | 23.45 |
| 10458 | 28.42 | 27.41 | 26.65 | 25.27 | 23.45 |
| 10460 | 28.39 | 27.38 | 26.62 | 25.24 | 23.45 |
| 10462 | 28.42 | 27.4  | 26.63 | 25.24 | 23.45 |
| 10464 | 28.39 | 27.38 | 26.62 | 25.24 | 23.44 |
| 10466 | 28.37 | 27.36 | 26.61 | 25.23 | 23.43 |
| 10468 | 28.36 | 27.35 | 26.59 | 25.22 | 23.43 |
| 10470 | 28.35 | 27.35 | 26.58 | 25.21 | 23.43 |
| 10472 | 28.34 | 27.33 | 26.57 | 25.21 | 23.43 |
| 10474 | 28.34 | 27.32 | 26.56 | 25.2  | 23.42 |
| 10476 | 28.34 | 27.32 | 26.56 | 25.21 | 23.41 |
| 10478 | 28.32 | 27.3  | 26.53 | 25.18 | 23.4  |
| 10480 | 28.32 | 27.3  | 26.54 | 25.19 | 23.4  |
| 10482 | 28.32 | 27.3  | 26.54 | 25.2  | 23.41 |
| 10484 | 28.28 | 27.26 | 26.5  | 25.16 | 23.38 |
| 10486 | 28.25 | 27.24 | 26.47 | 25.13 | 23.36 |
| 10488 | 28.27 | 27.26 | 26.51 | 25.15 | 23.39 |
| 10490 | 28.25 | 27.24 | 26.48 | 25.13 | 23.37 |
| 10492 | 28.26 | 27.25 | 26.47 | 25.13 | 23.37 |

|       |       |       |       |       |       |
|-------|-------|-------|-------|-------|-------|
| 10494 | 28.23 | 27.22 | 26.46 | 25.12 | 23.36 |
| 10496 | 28.26 | 27.24 | 26.48 | 25.15 | 23.38 |
| 10498 | 28.26 | 27.23 | 26.48 | 25.15 | 23.39 |
| 10500 | 28.23 | 27.22 | 26.46 | 25.13 | 23.38 |
| 10502 | 28.19 | 27.17 | 26.42 | 25.09 | 23.34 |
| 10504 | 28.21 | 27.19 | 26.43 | 25.1  | 23.35 |
| 10506 | 28.18 | 27.16 | 26.4  | 25.08 | 23.34 |
| 10508 | 28.2  | 27.17 | 26.4  | 25.09 | 23.34 |
| 10510 | 28.2  | 27.18 | 26.42 | 25.11 | 23.37 |
| 10512 | 28.18 | 27.16 | 26.41 | 25.1  | 23.36 |
| 10514 | 28.19 | 27.16 | 26.4  | 25.09 | 23.35 |
| 10516 | 28.19 | 27.17 | 26.42 | 25.1  | 23.37 |
| 10518 | 28.19 | 27.17 | 26.41 | 25.1  | 23.36 |
| 10520 | 28.15 | 27.12 | 26.37 | 25.06 | 23.33 |

|            |    |       |       |       |       |       |
|------------|----|-------|-------|-------|-------|-------|
| 100kg425C° | 0  | 21    | 20.9  | 20.91 | 20.95 | 20.87 |
|            | 2  | 21.03 | 20.92 | 20.93 | 20.96 | 20.89 |
|            | 4  | 21.02 | 20.91 | 20.92 | 20.97 | 20.89 |
|            | 6  | 21.05 | 20.95 | 20.95 | 20.99 | 20.91 |
|            | 8  | 21.03 | 20.92 | 20.93 | 20.97 | 20.9  |
|            | 10 | 21.06 | 20.95 | 20.96 | 21.01 | 20.92 |
|            | 12 | 21.04 | 20.92 | 20.94 | 20.98 | 20.91 |
|            | 14 | 21.01 | 20.89 | 20.92 | 20.95 | 20.88 |
|            | 16 | 21.01 | 20.9  | 20.92 | 20.95 | 20.89 |
|            | 18 | 21    | 20.89 | 20.91 | 20.94 | 20.89 |
|            | 20 | 21.04 | 20.93 | 20.95 | 20.99 | 20.93 |
|            | 22 | 21.04 | 20.93 | 20.94 | 20.99 | 20.93 |
|            | 24 | 21.05 | 20.93 | 20.95 | 20.99 | 20.92 |
|            | 26 | 21.05 | 20.93 | 20.95 | 20.99 | 20.92 |
|            | 28 | 21.04 | 20.92 | 20.95 | 20.98 | 20.92 |
|            | 30 | 21.06 | 20.94 | 20.96 | 21    | 20.92 |
|            | 32 | 21.06 | 20.95 | 20.96 | 21    | 20.92 |
|            | 34 | 21.08 | 20.96 | 20.97 | 21.02 | 20.93 |
|            | 36 | 21.09 | 20.94 | 20.97 | 21.01 | 20.93 |
|            | 38 | 21.1  | 20.94 | 20.96 | 21    | 20.92 |
|            | 40 | 21.1  | 20.93 | 20.94 | 20.99 | 20.91 |
|            | 42 | 21.16 | 20.97 | 20.98 | 21.03 | 20.95 |
|            | 44 | 21.17 | 20.94 | 20.95 | 20.99 | 20.9  |
|            | 46 | 21.2  | 20.93 | 20.96 | 21    | 20.92 |
|            | 48 | 21.24 | 20.96 | 20.99 | 21.01 | 20.96 |
|            | 50 | 21.28 | 21.04 | 21.01 | 21.05 | 20.99 |
|            | 52 | 21.27 | 21.05 | 20.97 | 21.02 | 20.96 |
|            | 54 | 21.29 | 21.11 | 21    | 21.03 | 20.96 |
|            | 56 | 21.29 | 21.14 | 21.01 | 21.02 | 20.95 |



|     |       |       |       |       |       |
|-----|-------|-------|-------|-------|-------|
| 58  | 21.3  | 21.19 | 21.06 | 21.02 | 20.95 |
| 60  | 21.31 | 21.22 | 21.1  | 21.02 | 20.95 |
| 62  | 21.34 | 21.3  | 21.18 | 21.07 | 20.98 |
| 64  | 21.33 | 21.32 | 21.19 | 21.07 | 20.95 |
| 66  | 21.34 | 21.34 | 21.22 | 21.12 | 20.95 |
| 68  | 21.36 | 21.4  | 21.27 | 21.19 | 20.99 |
| 70  | 21.35 | 21.41 | 21.29 | 21.22 | 20.99 |
| 72  | 21.36 | 21.44 | 21.31 | 21.26 | 21.01 |
| 74  | 21.38 | 21.48 | 21.35 | 21.32 | 21.05 |
| 76  | 21.38 | 21.5  | 21.37 | 21.35 | 21.1  |
| 78  | 21.4  | 21.53 | 21.4  | 21.39 | 21.14 |
| 80  | 21.39 | 21.54 | 21.39 | 21.4  | 21.17 |
| 82  | 21.4  | 21.57 | 21.43 | 21.46 | 21.24 |
| 84  | 21.44 | 21.61 | 21.46 | 21.5  | 21.29 |
| 86  | 21.43 | 21.63 | 21.48 | 21.54 | 21.33 |
| 88  | 21.42 | 21.62 | 21.48 | 21.54 | 21.35 |
| 90  | 21.44 | 21.66 | 21.52 | 21.6  | 21.4  |
| 92  | 21.43 | 21.66 | 21.51 | 21.6  | 21.42 |
| 94  | 21.45 | 21.69 | 21.54 | 21.64 | 21.46 |
| 96  | 21.43 | 21.7  | 21.55 | 21.65 | 21.47 |
| 98  | 21.44 | 21.72 | 21.56 | 21.67 | 21.5  |
| 100 | 21.45 | 21.73 | 21.58 | 21.7  | 21.54 |
| 102 | 21.45 | 21.75 | 21.59 | 21.72 | 21.56 |
| 104 | 21.45 | 21.75 | 21.58 | 21.73 | 21.57 |
| 106 | 21.46 | 21.78 | 21.62 | 21.77 | 21.61 |
| 108 | 21.47 | 21.8  | 21.65 | 21.81 | 21.66 |
| 110 | 21.46 | 21.8  | 21.63 | 21.79 | 21.65 |
| 112 | 21.48 | 21.84 | 21.66 | 21.81 | 21.67 |
| 114 | 21.48 | 21.84 | 21.68 | 21.85 | 21.69 |
| 116 | 21.51 | 21.88 | 21.71 | 21.89 | 21.74 |
| 118 | 21.48 | 21.87 | 21.7  | 21.88 | 21.73 |
| 120 | 21.47 | 21.86 | 21.69 | 21.88 | 21.72 |
| 122 | 21.52 | 21.93 | 21.75 | 21.94 | 21.78 |
| 124 | 21.53 | 21.94 | 21.77 | 21.95 | 21.8  |
| 126 | 21.51 | 21.93 | 21.75 | 21.95 | 21.79 |
| 128 | 21.53 | 21.97 | 21.78 | 21.99 | 21.84 |
| 130 | 21.5  | 21.97 | 21.77 | 21.99 | 21.83 |
| 132 | 21.52 | 21.98 | 21.8  | 22.01 | 21.86 |
| 134 | 21.53 | 21.98 | 21.81 | 22.01 | 21.88 |
| 136 | 21.54 | 22    | 21.81 | 22.03 | 21.88 |
| 138 | 21.54 | 22.01 | 21.82 | 22.05 | 21.9  |
| 140 | 21.53 | 22.01 | 21.81 | 22.03 | 21.89 |
| 142 | 21.54 | 22.02 | 21.83 | 22.06 | 21.92 |
| 144 | 21.56 | 22.04 | 21.84 | 22.08 | 21.92 |

|     |       |       |       |       |       |
|-----|-------|-------|-------|-------|-------|
| 146 | 21.57 | 22.05 | 21.85 | 22.09 | 21.94 |
| 148 | 21.59 | 22.06 | 21.86 | 22.11 | 21.95 |
| 150 | 21.62 | 22.1  | 21.91 | 22.14 | 21.98 |
| 152 | 21.62 | 22.1  | 21.9  | 22.14 | 21.99 |
| 154 | 21.62 | 22.1  | 21.88 | 22.13 | 21.97 |
| 156 | 21.63 | 22.11 | 21.9  | 22.16 | 22.01 |
| 158 | 21.7  | 22.16 | 21.95 | 22.21 | 22.06 |
| 160 | 21.72 | 22.17 | 21.97 | 22.22 | 22.07 |
| 162 | 21.69 | 22.13 | 21.93 | 22.2  | 22.03 |
| 164 | 21.72 | 22.17 | 21.96 | 22.22 | 22.07 |
| 166 | 21.75 | 22.19 | 21.97 | 22.23 | 22.06 |
| 168 | 21.77 | 22.2  | 21.98 | 22.25 | 22.08 |
| 170 | 21.8  | 22.21 | 21.99 | 22.27 | 22.1  |
| 172 | 21.81 | 22.21 | 21.98 | 22.25 | 22.09 |
| 174 | 21.84 | 22.23 | 22    | 22.28 | 22.12 |
| 176 | 21.85 | 22.22 | 22    | 22.29 | 22.11 |
| 178 | 21.85 | 22.19 | 21.97 | 22.25 | 22.09 |
| 180 | 21.86 | 22.21 | 21.98 | 22.27 | 22.12 |
| 182 | 21.93 | 22.26 | 22.03 | 22.3  | 22.14 |
| 184 | 21.96 | 22.26 | 22.03 | 22.32 | 22.14 |
| 186 | 21.99 | 22.27 | 22.02 | 22.32 | 22.15 |
| 188 | 22.02 | 22.27 | 22.04 | 22.34 | 22.16 |
| 190 | 22.05 | 22.28 | 22.05 | 22.34 | 22.17 |
| 192 | 22.1  | 22.3  | 22.07 | 22.35 | 22.19 |
| 194 | 22.12 | 22.3  | 22.05 | 22.36 | 22.19 |
| 196 | 22.16 | 22.3  | 22.06 | 22.37 | 22.19 |
| 198 | 22.22 | 22.33 | 22.09 | 22.37 | 22.2  |
| 200 | 22.25 | 22.32 | 22.08 | 22.37 | 22.2  |
| 202 | 22.29 | 22.32 | 22.08 | 22.4  | 22.22 |
| 204 | 22.36 | 22.36 | 22.11 | 22.42 | 22.24 |
| 206 | 22.39 | 22.34 | 22.09 | 22.41 | 22.23 |
| 208 | 22.44 | 22.35 | 22.11 | 22.43 | 22.24 |
| 210 | 22.5  | 22.37 | 22.11 | 22.43 | 22.24 |
| 212 | 22.53 | 22.35 | 22.11 | 22.42 | 22.24 |
| 214 | 22.61 | 22.37 | 22.13 | 22.44 | 22.25 |
| 216 | 22.69 | 22.41 | 22.16 | 22.46 | 22.28 |
| 218 | 22.71 | 22.38 | 22.14 | 22.47 | 22.28 |
| 220 | 22.76 | 22.38 | 22.13 | 22.45 | 22.27 |
| 222 | 22.85 | 22.4  | 22.15 | 22.47 | 22.29 |
| 224 | 22.89 | 22.39 | 22.13 | 22.45 | 22.28 |
| 226 | 22.97 | 22.42 | 22.16 | 22.48 | 22.3  |
| 228 | 23.04 | 22.44 | 22.18 | 22.51 | 22.31 |
| 230 | 23.09 | 22.44 | 22.17 | 22.51 | 22.31 |
| 232 | 23.17 | 22.45 | 22.16 | 22.49 | 22.3  |

|     |       |       |       |       |       |
|-----|-------|-------|-------|-------|-------|
| 234 | 23.25 | 22.45 | 22.18 | 22.52 | 22.33 |
| 236 | 23.35 | 22.47 | 22.21 | 22.55 | 22.36 |
| 238 | 23.4  | 22.46 | 22.19 | 22.53 | 22.33 |
| 240 | 23.52 | 22.49 | 22.22 | 22.56 | 22.36 |
| 242 | 23.59 | 22.48 | 22.21 | 22.55 | 22.35 |
| 244 | 23.67 | 22.48 | 22.21 | 22.54 | 22.36 |
| 246 | 23.79 | 22.51 | 22.23 | 22.57 | 22.37 |
| 248 | 23.86 | 22.5  | 22.23 | 22.57 | 22.37 |
| 250 | 23.95 | 22.51 | 22.24 | 22.58 | 22.36 |
| 252 | 24.06 | 22.53 | 22.25 | 22.6  | 22.38 |
| 254 | 24.16 | 22.52 | 22.25 | 22.59 | 22.37 |
| 256 | 24.26 | 22.54 | 22.27 | 22.61 | 22.39 |
| 258 | 24.35 | 22.52 | 22.24 | 22.59 | 22.37 |
| 260 | 24.41 | 22.5  | 22.22 | 22.57 | 22.37 |
| 262 | 24.55 | 22.54 | 22.25 | 22.6  | 22.4  |
| 264 | 24.66 | 22.54 | 22.25 | 22.59 | 22.39 |
| 266 | 24.8  | 22.56 | 22.28 | 22.63 | 22.41 |
| 268 | 24.89 | 22.56 | 22.27 | 22.62 | 22.4  |
| 270 | 25    | 22.56 | 22.27 | 22.62 | 22.41 |
| 272 | 25.12 | 22.57 | 22.28 | 22.62 | 22.4  |
| 274 | 25.26 | 22.58 | 22.29 | 22.64 | 22.42 |
| 276 | 25.35 | 22.57 | 22.27 | 22.63 | 22.41 |
| 278 | 25.45 | 22.57 | 22.27 | 22.62 | 22.4  |
| 280 | 25.61 | 22.59 | 22.29 | 22.64 | 22.43 |
| 282 | 25.71 | 22.58 | 22.27 | 22.61 | 22.4  |
| 284 | 25.85 | 22.59 | 22.29 | 22.64 | 22.43 |
| 286 | 25.98 | 22.61 | 22.31 | 22.66 | 22.44 |
| 288 | 26.14 | 22.62 | 22.3  | 22.66 | 22.44 |
| 290 | 26.26 | 22.62 | 22.31 | 22.65 | 22.45 |
| 292 | 26.4  | 22.62 | 22.31 | 22.66 | 22.45 |
| 294 | 26.58 | 22.66 | 22.35 | 22.7  | 22.48 |
| 296 | 26.71 | 22.66 | 22.33 | 22.69 | 22.46 |
| 298 | 26.87 | 22.66 | 22.34 | 22.72 | 22.47 |
| 300 | 27.01 | 22.69 | 22.36 | 22.72 | 22.49 |
| 302 | 27.21 | 22.71 | 22.37 | 22.74 | 22.51 |
| 304 | 27.29 | 22.66 | 22.33 | 22.7  | 22.47 |
| 306 | 27.48 | 22.72 | 22.38 | 22.74 | 22.5  |
| 308 | 27.65 | 22.75 | 22.41 | 22.77 | 22.53 |
| 310 | 27.79 | 22.75 | 22.4  | 22.77 | 22.53 |
| 312 | 27.96 | 22.75 | 22.4  | 22.76 | 22.53 |
| 314 | 28.07 | 22.72 | 22.37 | 22.73 | 22.5  |
| 316 | 28.23 | 22.71 | 22.36 | 22.71 | 22.48 |
| 318 | 28.41 | 22.73 | 22.36 | 22.71 | 22.48 |
| 320 | 28.58 | 22.75 | 22.39 | 22.74 | 22.52 |

|     |       |       |       |       |       |
|-----|-------|-------|-------|-------|-------|
| 322 | 28.75 | 22.77 | 22.38 | 22.75 | 22.52 |
| 324 | 28.92 | 22.79 | 22.41 | 22.77 | 22.54 |
| 326 | 29.12 | 22.8  | 22.41 | 22.78 | 22.54 |
| 328 | 29.29 | 22.81 | 22.42 | 22.78 | 22.55 |
| 330 | 29.47 | 22.81 | 22.42 | 22.78 | 22.55 |
| 332 | 29.63 | 22.82 | 22.42 | 22.78 | 22.55 |
| 334 | 29.84 | 22.83 | 22.42 | 22.78 | 22.55 |
| 336 | 30.03 | 22.84 | 22.43 | 22.79 | 22.55 |
| 338 | 30.2  | 22.85 | 22.43 | 22.8  | 22.55 |
| 340 | 30.38 | 22.86 | 22.44 | 22.81 | 22.55 |
| 342 | 30.57 | 22.87 | 22.44 | 22.81 | 22.56 |
| 344 | 30.77 | 22.88 | 22.44 | 22.81 | 22.56 |
| 346 | 30.95 | 22.88 | 22.44 | 22.81 | 22.56 |
| 348 | 31.14 | 22.9  | 22.44 | 22.81 | 22.56 |
| 350 | 31.34 | 22.92 | 22.45 | 22.82 | 22.56 |
| 352 | 31.55 | 22.92 | 22.44 | 22.82 | 22.56 |
| 354 | 31.75 | 22.94 | 22.46 | 22.84 | 22.58 |
| 356 | 31.97 | 22.98 | 22.5  | 22.86 | 22.61 |
| 358 | 32.17 | 22.99 | 22.48 | 22.86 | 22.6  |
| 360 | 32.3  | 22.93 | 22.4  | 22.8  | 22.55 |
| 362 | 32.53 | 22.97 | 22.44 | 22.82 | 22.57 |
| 364 | 32.75 | 22.98 | 22.45 | 22.82 | 22.57 |
| 366 | 32.95 | 22.99 | 22.46 | 22.81 | 22.57 |
| 368 | 33.19 | 23    | 22.45 | 22.82 | 22.57 |
| 370 | 33.4  | 23.01 | 22.45 | 22.82 | 22.57 |
| 372 | 33.61 | 23.01 | 22.44 | 22.81 | 22.56 |
| 374 | 33.87 | 23.02 | 22.44 | 22.81 | 22.57 |
| 376 | 34.1  | 23.06 | 22.46 | 22.84 | 22.58 |
| 378 | 34.32 | 23.07 | 22.47 | 22.84 | 22.57 |
| 380 | 34.54 | 23.09 | 22.48 | 22.84 | 22.57 |
| 382 | 34.73 | 23.07 | 22.45 | 22.82 | 22.55 |
| 384 | 35    | 23.09 | 22.47 | 22.83 | 22.56 |
| 386 | 35.24 | 23.14 | 22.49 | 22.86 | 22.59 |
| 388 | 35.47 | 23.16 | 22.51 | 22.87 | 22.61 |
| 390 | 35.67 | 23.16 | 22.48 | 22.86 | 22.6  |
| 392 | 35.93 | 23.17 | 22.47 | 22.83 | 22.58 |
| 394 | 36.16 | 23.18 | 22.47 | 22.83 | 22.59 |
| 396 | 36.4  | 23.2  | 22.47 | 22.84 | 22.59 |
| 398 | 36.64 | 23.23 | 22.48 | 22.85 | 22.59 |
| 400 | 36.92 | 23.27 | 22.49 | 22.87 | 22.6  |
| 402 | 37.16 | 23.3  | 22.51 | 22.88 | 22.62 |
| 404 | 37.37 | 23.29 | 22.47 | 22.85 | 22.59 |
| 406 | 37.66 | 23.35 | 22.52 | 22.91 | 22.64 |
| 408 | 37.96 | 23.39 | 22.55 | 22.92 | 22.65 |

|     |       |       |       |       |       |
|-----|-------|-------|-------|-------|-------|
| 410 | 38.21 | 23.42 | 22.56 | 22.94 | 22.67 |
| 412 | 38.43 | 23.42 | 22.56 | 22.92 | 22.65 |
| 414 | 38.73 | 23.45 | 22.56 | 22.93 | 22.66 |
| 416 | 38.96 | 23.46 | 22.56 | 22.91 | 22.64 |
| 418 | 39.21 | 23.49 | 22.56 | 22.91 | 22.64 |
| 420 | 39.46 | 23.52 | 22.57 | 22.93 | 22.65 |
| 422 | 39.71 | 23.55 | 22.57 | 22.93 | 22.66 |
| 424 | 40.01 | 23.58 | 22.58 | 22.94 | 22.68 |
| 426 | 40.27 | 23.62 | 22.61 | 22.97 | 22.7  |
| 428 | 40.5  | 23.62 | 22.58 | 22.94 | 22.67 |
| 430 | 40.83 | 23.68 | 22.59 | 22.96 | 22.68 |
| 432 | 41.06 | 23.69 | 22.58 | 22.95 | 22.67 |
| 434 | 41.31 | 23.71 | 22.58 | 22.94 | 22.66 |
| 436 | 41.56 | 23.74 | 22.58 | 22.95 | 22.67 |
| 438 | 41.87 | 23.78 | 22.59 | 22.95 | 22.68 |
| 440 | 42.13 | 23.81 | 22.59 | 22.95 | 22.67 |
| 442 | 42.41 | 23.86 | 22.62 | 22.98 | 22.69 |
| 444 | 42.66 | 23.88 | 22.63 | 22.98 | 22.72 |
| 446 | 42.94 | 23.89 | 22.61 | 22.96 | 22.7  |
| 448 | 43.2  | 23.93 | 22.61 | 22.96 | 22.69 |
| 450 | 43.49 | 23.99 | 22.65 | 22.98 | 22.72 |
| 452 | 43.76 | 24.02 | 22.66 | 23    | 22.73 |
| 454 | 44    | 24.05 | 22.65 | 23    | 22.73 |
| 456 | 44.26 | 24.07 | 22.62 | 22.97 | 22.71 |
| 458 | 44.54 | 24.11 | 22.63 | 22.98 | 22.71 |
| 460 | 44.83 | 24.17 | 22.64 | 23    | 22.73 |
| 462 | 45.09 | 24.2  | 22.65 | 23.01 | 22.73 |
| 464 | 45.42 | 24.26 | 22.68 | 23.03 | 22.76 |
| 466 | 45.68 | 24.3  | 22.68 | 23.03 | 22.75 |
| 468 | 45.94 | 24.34 | 22.68 | 23.04 | 22.75 |
| 470 | 46.19 | 24.38 | 22.66 | 23.03 | 22.74 |
| 472 | 46.51 | 24.43 | 22.69 | 23.04 | 22.76 |
| 474 | 46.77 | 24.46 | 22.69 | 23.04 | 22.76 |
| 476 | 46.99 | 24.47 | 22.67 | 23.01 | 22.74 |
| 478 | 47.27 | 24.53 | 22.67 | 23.02 | 22.76 |
| 480 | 47.58 | 24.59 | 22.69 | 23.03 | 22.76 |
| 482 | 47.84 | 24.63 | 22.7  | 23.04 | 22.77 |
| 484 | 48.1  | 24.67 | 22.7  | 23.03 | 22.77 |
| 486 | 48.39 | 24.72 | 22.71 | 23.04 | 22.75 |
| 488 | 48.66 | 24.75 | 22.69 | 23.01 | 22.74 |
| 490 | 48.94 | 24.81 | 22.7  | 23.04 | 22.78 |
| 492 | 49.2  | 24.86 | 22.71 | 23.04 | 22.78 |
| 494 | 49.51 | 24.93 | 22.71 | 23.05 | 22.77 |
| 496 | 49.78 | 24.97 | 22.72 | 23.05 | 22.77 |

|     |       |       |       |       |       |
|-----|-------|-------|-------|-------|-------|
| 498 | 50.05 | 25.02 | 22.72 | 23.05 | 22.77 |
| 500 | 50.32 | 25.07 | 22.73 | 23.06 | 22.78 |
| 502 | 50.58 | 25.12 | 22.73 | 23.06 | 22.78 |
| 504 | 50.91 | 25.18 | 22.74 | 23.07 | 22.79 |
| 506 | 51.16 | 25.24 | 22.74 | 23.07 | 22.78 |
| 508 | 51.42 | 25.3  | 22.74 | 23.07 | 22.79 |
| 510 | 51.66 | 25.35 | 22.74 | 23.07 | 22.79 |
| 512 | 51.96 | 25.38 | 22.72 | 23.05 | 22.77 |
| 514 | 52.28 | 25.49 | 22.79 | 23.1  | 22.84 |
| 516 | 52.53 | 25.51 | 22.76 | 23.07 | 22.79 |
| 518 | 52.85 | 25.61 | 22.82 | 23.12 | 22.85 |
| 520 | 53.15 | 25.67 | 22.8  | 23.11 | 22.83 |
| 522 | 53.45 | 25.76 | 22.84 | 23.13 | 22.86 |
| 524 | 53.69 | 25.78 | 22.81 | 23.11 | 22.83 |
| 526 | 54    | 25.84 | 22.81 | 23.11 | 22.82 |
| 528 | 54.27 | 25.91 | 22.8  | 23.1  | 22.82 |
| 530 | 54.54 | 25.99 | 22.83 | 23.12 | 22.85 |
| 532 | 54.82 | 26.05 | 22.85 | 23.13 | 22.87 |
| 534 | 55.13 | 26.11 | 22.84 | 23.13 | 22.87 |
| 536 | 55.4  | 26.19 | 22.85 | 23.14 | 22.87 |
| 538 | 55.68 | 26.26 | 22.86 | 23.13 | 22.86 |
| 540 | 55.95 | 26.33 | 22.85 | 23.13 | 22.85 |
| 542 | 56.22 | 26.39 | 22.86 | 23.13 | 22.86 |
| 544 | 56.55 | 26.48 | 22.89 | 23.13 | 22.87 |
| 546 | 56.81 | 26.53 | 22.88 | 23.14 | 22.87 |
| 548 | 57.09 | 26.62 | 22.88 | 23.15 | 22.87 |
| 550 | 57.37 | 26.7  | 22.88 | 23.16 | 22.88 |
| 552 | 57.68 | 26.78 | 22.89 | 23.16 | 22.88 |
| 554 | 57.95 | 26.85 | 22.9  | 23.16 | 22.89 |
| 556 | 58.24 | 26.93 | 22.91 | 23.16 | 22.89 |
| 558 | 58.51 | 27    | 22.92 | 23.17 | 22.9  |
| 560 | 58.82 | 27.08 | 22.92 | 23.16 | 22.88 |
| 562 | 59.11 | 27.18 | 22.94 | 23.18 | 22.9  |
| 564 | 59.37 | 27.24 | 22.93 | 23.17 | 22.89 |
| 566 | 59.63 | 27.31 | 22.92 | 23.16 | 22.88 |
| 568 | 59.97 | 27.43 | 22.94 | 23.17 | 22.91 |
| 570 | 60.25 | 27.5  | 22.96 | 23.18 | 22.91 |
| 572 | 60.53 | 27.56 | 22.97 | 23.18 | 22.9  |
| 574 | 60.85 | 27.64 | 22.98 | 23.18 | 22.91 |
| 576 | 61.13 | 27.75 | 23    | 23.21 | 22.93 |
| 578 | 61.39 | 27.8  | 22.98 | 23.18 | 22.9  |
| 580 | 61.71 | 27.94 | 23.03 | 23.23 | 22.96 |
| 582 | 62.05 | 28.03 | 23.05 | 23.24 | 22.97 |
| 584 | 62.28 | 28.08 | 23    | 23.19 | 22.92 |

|     |       |       |       |       |       |
|-----|-------|-------|-------|-------|-------|
| 586 | 62.57 | 28.19 | 23.04 | 23.22 | 22.94 |
| 588 | 62.83 | 28.25 | 23.03 | 23.21 | 22.93 |
| 590 | 63.17 | 28.34 | 23.05 | 23.23 | 22.96 |
| 592 | 63.43 | 28.41 | 23.03 | 23.2  | 22.93 |
| 594 | 63.75 | 28.53 | 23.07 | 23.23 | 22.97 |
| 596 | 64.01 | 28.61 | 23.07 | 23.22 | 22.96 |
| 598 | 64.3  | 28.71 | 23.08 | 23.23 | 22.95 |
| 600 | 64.62 | 28.8  | 23.08 | 23.24 | 22.96 |
| 602 | 64.87 | 28.88 | 23.08 | 23.23 | 22.95 |
| 604 | 65.15 | 28.96 | 23.07 | 23.22 | 22.93 |
| 606 | 65.44 | 29.06 | 23.11 | 23.23 | 22.96 |
| 608 | 65.77 | 29.16 | 23.13 | 23.24 | 22.98 |
| 610 | 66.04 | 29.25 | 23.12 | 23.22 | 22.96 |
| 612 | 66.37 | 29.38 | 23.16 | 23.26 | 23    |
| 614 | 66.7  | 29.48 | 23.17 | 23.27 | 23    |
| 616 | 66.98 | 29.59 | 23.18 | 23.27 | 23    |
| 618 | 67.25 | 29.66 | 23.17 | 23.26 | 22.99 |
| 620 | 67.51 | 29.75 | 23.16 | 23.25 | 22.98 |
| 622 | 67.85 | 29.85 | 23.19 | 23.25 | 22.97 |
| 624 | 68.11 | 29.94 | 23.16 | 23.24 | 22.95 |
| 626 | 68.38 | 30.03 | 23.17 | 23.23 | 22.95 |
| 628 | 68.72 | 30.18 | 23.23 | 23.29 | 23    |
| 630 | 69.04 | 30.26 | 23.25 | 23.29 | 23    |
| 632 | 69.32 | 30.37 | 23.24 | 23.27 | 22.99 |
| 634 | 69.61 | 30.46 | 23.27 | 23.29 | 23.02 |
| 636 | 69.91 | 30.56 | 23.26 | 23.27 | 23    |
| 638 | 70.19 | 30.64 | 23.25 | 23.26 | 22.99 |
| 640 | 70.5  | 30.77 | 23.29 | 23.28 | 23    |
| 642 | 70.78 | 30.87 | 23.32 | 23.3  | 23.01 |
| 644 | 71.09 | 30.98 | 23.33 | 23.29 | 23.02 |
| 646 | 71.34 | 31.04 | 23.32 | 23.27 | 23.01 |
| 648 | 71.72 | 31.2  | 23.36 | 23.32 | 23.04 |
| 650 | 72.01 | 31.32 | 23.37 | 23.33 | 23.04 |
| 652 | 72.26 | 31.4  | 23.38 | 23.33 | 23.03 |
| 654 | 72.56 | 31.52 | 23.4  | 23.34 | 23.05 |
| 656 | 72.94 | 31.68 | 23.46 | 23.39 | 23.09 |
| 658 | 73.2  | 31.75 | 23.44 | 23.36 | 23.07 |
| 660 | 73.48 | 31.84 | 23.44 | 23.35 | 23.05 |
| 662 | 73.75 | 31.95 | 23.45 | 23.35 | 23.06 |
| 664 | 74.08 | 32.07 | 23.46 | 23.36 | 23.05 |
| 666 | 74.38 | 32.18 | 23.51 | 23.39 | 23.1  |
| 668 | 74.64 | 32.27 | 23.49 | 23.36 | 23.08 |
| 670 | 74.92 | 32.38 | 23.51 | 23.37 | 23.08 |
| 672 | 75.25 | 32.49 | 23.53 | 23.37 | 23.08 |

|     |       |       |       |       |       |
|-----|-------|-------|-------|-------|-------|
| 674 | 75.57 | 32.61 | 23.56 | 23.38 | 23.1  |
| 676 | 75.88 | 32.75 | 23.6  | 23.42 | 23.14 |
| 678 | 76.15 | 32.85 | 23.62 | 23.42 | 23.12 |
| 680 | 76.49 | 32.96 | 23.64 | 23.43 | 23.14 |
| 682 | 76.77 | 33.08 | 23.65 | 23.44 | 23.15 |
| 684 | 77.04 | 33.18 | 23.65 | 23.42 | 23.14 |
| 686 | 77.36 | 33.28 | 23.66 | 23.43 | 23.15 |
| 688 | 77.66 | 33.41 | 23.7  | 23.45 | 23.16 |
| 690 | 77.93 | 33.52 | 23.7  | 23.45 | 23.15 |
| 692 | 78.21 | 33.64 | 23.73 | 23.45 | 23.16 |
| 694 | 78.52 | 33.76 | 23.75 | 23.46 | 23.17 |
| 696 | 78.85 | 33.87 | 23.75 | 23.46 | 23.17 |
| 698 | 79.13 | 33.97 | 23.78 | 23.47 | 23.16 |
| 700 | 79.39 | 34.05 | 23.76 | 23.44 | 23.14 |
| 702 | 79.76 | 34.21 | 23.81 | 23.49 | 23.18 |
| 704 | 80.02 | 34.33 | 23.82 | 23.5  | 23.17 |
| 706 | 80.29 | 34.42 | 23.83 | 23.49 | 23.17 |
| 708 | 80.61 | 34.56 | 23.87 | 23.51 | 23.19 |
| 710 | 80.95 | 34.66 | 23.89 | 23.51 | 23.2  |
| 712 | 81.24 | 34.79 | 23.91 | 23.51 | 23.19 |
| 714 | 81.51 | 34.87 | 23.91 | 23.5  | 23.18 |
| 716 | 81.8  | 34.99 | 23.95 | 23.52 | 23.21 |
| 718 | 82.09 | 35.1  | 23.96 | 23.54 | 23.21 |
| 720 | 82.44 | 35.26 | 24.01 | 23.56 | 23.22 |
| 722 | 82.77 | 35.38 | 24.06 | 23.59 | 23.25 |
| 724 | 82.99 | 35.4  | 24    | 23.52 | 23.19 |
| 726 | 83.23 | 35.49 | 23.99 | 23.5  | 23.17 |
| 728 | 83.58 | 35.66 | 24.05 | 23.53 | 23.21 |
| 730 | 83.86 | 35.76 | 24.07 | 23.55 | 23.21 |
| 732 | 84.17 | 35.87 | 24.1  | 23.56 | 23.23 |
| 734 | 84.5  | 35.98 | 24.11 | 23.55 | 23.22 |
| 736 | 84.8  | 36.1  | 24.13 | 23.56 | 23.22 |
| 738 | 85.06 | 36.2  | 24.14 | 23.57 | 23.23 |
| 740 | 85.36 | 36.33 | 24.17 | 23.58 | 23.24 |
| 742 | 85.69 | 36.44 | 24.21 | 23.6  | 23.24 |
| 744 | 85.98 | 36.56 | 24.23 | 23.6  | 23.24 |
| 746 | 86.27 | 36.67 | 24.25 | 23.61 | 23.25 |
| 748 | 86.56 | 36.77 | 24.27 | 23.61 | 23.25 |
| 750 | 86.95 | 36.95 | 24.34 | 23.66 | 23.31 |
| 752 | 87.26 | 37.07 | 24.38 | 23.68 | 23.33 |
| 754 | 87.53 | 37.16 | 24.39 | 23.67 | 23.31 |
| 756 | 87.79 | 37.24 | 24.39 | 23.66 | 23.3  |
| 758 | 88.07 | 37.33 | 24.41 | 23.65 | 23.3  |
| 760 | 88.44 | 37.47 | 24.46 | 23.69 | 23.33 |



|     |        |       |       |       |       |
|-----|--------|-------|-------|-------|-------|
| 762 | 88.74  | 37.59 | 24.5  | 23.71 | 23.34 |
| 764 | 89.02  | 37.7  | 24.51 | 23.7  | 23.32 |
| 766 | 89.29  | 37.79 | 24.51 | 23.7  | 23.32 |
| 768 | 89.62  | 37.9  | 24.53 | 23.7  | 23.31 |
| 770 | 89.94  | 38.04 | 24.58 | 23.72 | 23.34 |
| 772 | 90.24  | 38.15 | 24.62 | 23.74 | 23.37 |
| 774 | 90.51  | 38.24 | 24.63 | 23.74 | 23.36 |
| 776 | 90.85  | 38.35 | 24.64 | 23.73 | 23.34 |
| 778 | 91.15  | 38.47 | 24.68 | 23.74 | 23.37 |
| 780 | 91.46  | 38.57 | 24.72 | 23.76 | 23.38 |
| 782 | 91.74  | 38.68 | 24.74 | 23.77 | 23.39 |
| 784 | 92.06  | 38.79 | 24.75 | 23.78 | 23.38 |
| 786 | 92.36  | 38.9  | 24.79 | 23.79 | 23.39 |
| 788 | 92.64  | 38.97 | 24.79 | 23.75 | 23.36 |
| 790 | 92.97  | 39.08 | 24.81 | 23.77 | 23.38 |
| 792 | 93.28  | 39.22 | 24.86 | 23.79 | 23.4  |
| 794 | 93.56  | 39.32 | 24.89 | 23.8  | 23.41 |
| 796 | 93.82  | 39.4  | 24.89 | 23.8  | 23.4  |
| 798 | 94.09  | 39.49 | 24.9  | 23.79 | 23.38 |
| 800 | 94.46  | 39.64 | 24.95 | 23.8  | 23.4  |
| 802 | 94.76  | 39.75 | 24.99 | 23.83 | 23.42 |
| 804 | 95.05  | 39.84 | 25.02 | 23.84 | 23.43 |
| 806 | 95.34  | 39.94 | 25.04 | 23.84 | 23.44 |
| 808 | 95.68  | 40.05 | 25.08 | 23.86 | 23.44 |
| 810 | 95.96  | 40.16 | 25.11 | 23.87 | 23.45 |
| 812 | 96.26  | 40.26 | 25.13 | 23.87 | 23.44 |
| 814 | 96.55  | 40.36 | 25.16 | 23.88 | 23.45 |
| 816 | 96.91  | 40.48 | 25.21 | 23.9  | 23.46 |
| 818 | 97.18  | 40.57 | 25.23 | 23.89 | 23.46 |
| 820 | 97.49  | 40.69 | 25.28 | 23.93 | 23.48 |
| 822 | 97.77  | 40.8  | 25.3  | 23.95 | 23.51 |
| 824 | 98.09  | 40.89 | 25.3  | 23.93 | 23.49 |
| 826 | 98.39  | 40.99 | 25.34 | 23.94 | 23.5  |
| 828 | 98.67  | 41.08 | 25.37 | 23.94 | 23.48 |
| 830 | 98.99  | 41.17 | 25.39 | 23.95 | 23.48 |
| 832 | 99.32  | 41.32 | 25.46 | 24.01 | 23.53 |
| 834 | 99.6   | 41.42 | 25.48 | 24    | 23.53 |
| 836 | 99.84  | 41.49 | 25.49 | 23.98 | 23.51 |
| 838 | 100.2  | 41.64 | 25.56 | 24.02 | 23.55 |
| 840 | 100.49 | 41.72 | 25.57 | 24.01 | 23.53 |
| 842 | 100.77 | 41.82 | 25.61 | 24.04 | 23.54 |
| 844 | 101.07 | 41.92 | 25.65 | 24.06 | 23.57 |
| 846 | 101.41 | 42.02 | 25.68 | 24.07 | 23.58 |
| 848 | 101.68 | 42.12 | 25.71 | 24.05 | 23.56 |

|     |        |       |       |       |       |
|-----|--------|-------|-------|-------|-------|
| 850 | 101.93 | 42.18 | 25.72 | 24.05 | 23.56 |
| 852 | 102.21 | 42.29 | 25.75 | 24.07 | 23.57 |
| 854 | 102.49 | 42.38 | 25.77 | 24.09 | 23.58 |
| 856 | 102.86 | 42.5  | 25.82 | 24.11 | 23.59 |
| 858 | 103.12 | 42.56 | 25.84 | 24.08 | 23.56 |
| 860 | 103.41 | 42.65 | 25.87 | 24.09 | 23.57 |
| 862 | 103.69 | 42.75 | 25.9  | 24.1  | 23.57 |
| 864 | 104.04 | 42.87 | 25.96 | 24.14 | 23.61 |
| 866 | 104.34 | 42.96 | 26    | 24.15 | 23.62 |
| 868 | 104.61 | 43.04 | 26.01 | 24.15 | 23.6  |
| 870 | 104.94 | 43.13 | 26.06 | 24.16 | 23.62 |
| 872 | 105.24 | 43.23 | 26.08 | 24.16 | 23.63 |
| 874 | 105.56 | 43.35 | 26.15 | 24.21 | 23.65 |
| 876 | 105.82 | 43.42 | 26.17 | 24.21 | 23.64 |
| 878 | 106.16 | 43.52 | 26.21 | 24.23 | 23.66 |
| 880 | 106.45 | 43.61 | 26.23 | 24.22 | 23.64 |
| 882 | 106.73 | 43.7  | 26.28 | 24.24 | 23.65 |
| 884 | 107.03 | 43.79 | 26.33 | 24.26 | 23.67 |
| 886 | 107.31 | 43.88 | 26.35 | 24.27 | 23.67 |
| 888 | 107.61 | 43.96 | 26.38 | 24.27 | 23.68 |
| 890 | 107.88 | 44.05 | 26.41 | 24.28 | 23.68 |
| 892 | 108.17 | 44.15 | 26.45 | 24.29 | 23.69 |
| 894 | 108.46 | 44.22 | 26.49 | 24.3  | 23.69 |
| 896 | 108.82 | 44.33 | 26.54 | 24.32 | 23.71 |
| 898 | 109.1  | 44.39 | 26.56 | 24.32 | 23.71 |
| 900 | 109.38 | 44.48 | 26.6  | 24.33 | 23.71 |
| 902 | 109.72 | 44.57 | 26.64 | 24.36 | 23.71 |
| 904 | 110.02 | 44.67 | 26.68 | 24.37 | 23.72 |
| 906 | 110.3  | 44.74 | 26.72 | 24.38 | 23.73 |
| 908 | 110.57 | 44.81 | 26.74 | 24.37 | 23.71 |
| 910 | 110.85 | 44.87 | 26.77 | 24.38 | 23.71 |
| 912 | 111.15 | 44.97 | 26.8  | 24.39 | 23.73 |
| 914 | 111.47 | 45.07 | 26.87 | 24.41 | 23.74 |
| 916 | 111.77 | 45.15 | 26.9  | 24.43 | 23.75 |
| 918 | 112.04 | 45.23 | 26.94 | 24.44 | 23.75 |
| 920 | 112.37 | 45.31 | 26.97 | 24.45 | 23.76 |
| 922 | 112.68 | 45.41 | 27.04 | 24.5  | 23.8  |
| 924 | 112.94 | 45.48 | 27.05 | 24.48 | 23.78 |
| 926 | 113.29 | 45.58 | 27.11 | 24.52 | 23.8  |
| 928 | 113.59 | 45.68 | 27.15 | 24.54 | 23.82 |
| 930 | 113.87 | 45.77 | 27.2  | 24.56 | 23.85 |
| 932 | 114.14 | 45.83 | 27.23 | 24.55 | 23.82 |
| 934 | 114.51 | 45.92 | 27.29 | 24.58 | 23.86 |
| 936 | 114.75 | 45.96 | 27.29 | 24.56 | 23.82 |

|      |        |       |       |       |       |
|------|--------|-------|-------|-------|-------|
| 938  | 115.05 | 46.04 | 27.34 | 24.58 | 23.84 |
| 940  | 115.32 | 46.11 | 27.36 | 24.58 | 23.82 |
| 942  | 115.62 | 46.18 | 27.4  | 24.61 | 23.83 |
| 944  | 115.98 | 46.28 | 27.46 | 24.63 | 23.85 |
| 946  | 116.24 | 46.33 | 27.48 | 24.61 | 23.83 |
| 948  | 116.54 | 46.42 | 27.54 | 24.63 | 23.85 |
| 950  | 116.82 | 46.49 | 27.58 | 24.66 | 23.87 |
| 952  | 117.13 | 46.56 | 27.59 | 24.66 | 23.85 |
| 954  | 117.43 | 46.64 | 27.65 | 24.68 | 23.87 |
| 956  | 117.74 | 46.73 | 27.7  | 24.71 | 23.9  |
| 958  | 118.11 | 46.82 | 27.76 | 24.74 | 23.92 |
| 960  | 118.4  | 46.91 | 27.82 | 24.76 | 23.93 |
| 962  | 118.69 | 46.98 | 27.85 | 24.78 | 23.93 |
| 964  | 118.97 | 47.05 | 27.89 | 24.79 | 23.94 |
| 966  | 119.25 | 47.13 | 27.93 | 24.8  | 23.94 |
| 968  | 119.59 | 47.18 | 27.96 | 24.81 | 23.94 |
| 970  | 119.87 | 47.25 | 28.01 | 24.81 | 23.95 |
| 972  | 120.16 | 47.32 | 28.05 | 24.82 | 23.95 |
| 974  | 120.46 | 47.38 | 28.09 | 24.84 | 23.96 |
| 976  | 120.81 | 47.46 | 28.13 | 24.86 | 23.97 |
| 978  | 121.09 | 47.51 | 28.15 | 24.86 | 23.97 |
| 980  | 121.39 | 47.59 | 28.2  | 24.88 | 23.98 |
| 982  | 121.69 | 47.65 | 28.24 | 24.9  | 23.98 |
| 984  | 122.04 | 47.72 | 28.3  | 24.91 | 23.99 |
| 986  | 122.33 | 47.8  | 28.34 | 24.94 | 23.99 |
| 988  | 122.65 | 47.89 | 28.4  | 24.98 | 24.03 |
| 990  | 122.91 | 47.92 | 28.42 | 24.97 | 24.01 |
| 992  | 123.26 | 48.01 | 28.49 | 25    | 24.04 |
| 994  | 123.58 | 48.09 | 28.54 | 25.03 | 24.07 |
| 996  | 123.86 | 48.14 | 28.56 | 25.03 | 24.05 |
| 998  | 124.19 | 48.17 | 28.58 | 25.01 | 24.04 |
| 1000 | 124.48 | 48.25 | 28.63 | 25.02 | 24.04 |
| 1002 | 124.77 | 48.3  | 28.67 | 25.03 | 24.05 |
| 1004 | 125.04 | 48.33 | 28.68 | 25    | 24.01 |
| 1006 | 125.41 | 48.42 | 28.74 | 25.05 | 24.06 |
| 1008 | 125.71 | 48.5  | 28.79 | 25.07 | 24.07 |
| 1010 | 126    | 48.57 | 28.83 | 25.08 | 24.07 |
| 1012 | 126.33 | 48.66 | 28.92 | 25.15 | 24.14 |
| 1014 | 126.61 | 48.69 | 28.92 | 25.12 | 24.1  |
| 1016 | 127.01 | 48.81 | 29.02 | 25.18 | 24.14 |
| 1018 | 127.32 | 48.89 | 29.07 | 25.22 | 24.16 |
| 1020 | 127.59 | 48.93 | 29.1  | 25.22 | 24.15 |
| 1022 | 127.88 | 48.99 | 29.14 | 25.24 | 24.16 |
| 1024 | 128.21 | 49.05 | 29.18 | 25.25 | 24.17 |

|      |        |       |       |       |       |
|------|--------|-------|-------|-------|-------|
| 1026 | 128.52 | 49.14 | 29.25 | 25.28 | 24.19 |
| 1028 | 128.84 | 49.2  | 29.3  | 25.3  | 24.2  |
| 1030 | 129.19 | 49.25 | 29.34 | 25.31 | 24.21 |
| 1032 | 129.48 | 49.3  | 29.37 | 25.3  | 24.21 |
| 1034 | 129.8  | 49.36 | 29.43 | 25.33 | 24.22 |
| 1036 | 130.11 | 49.42 | 29.46 | 25.35 | 24.23 |
| 1038 | 130.41 | 49.48 | 29.52 | 25.36 | 24.23 |
| 1040 | 130.75 | 49.54 | 29.57 | 25.37 | 24.24 |
| 1042 | 131.05 | 49.59 | 29.6  | 25.38 | 24.25 |
| 1044 | 131.34 | 49.65 | 29.65 | 25.41 | 24.25 |
| 1046 | 131.64 | 49.72 | 29.69 | 25.43 | 24.26 |
| 1048 | 132    | 49.79 | 29.74 | 25.45 | 24.27 |
| 1050 | 132.32 | 49.86 | 29.82 | 25.49 | 24.31 |
| 1052 | 132.66 | 49.94 | 29.87 | 25.53 | 24.33 |
| 1054 | 132.96 | 49.98 | 29.9  | 25.52 | 24.32 |
| 1056 | 133.27 | 50.01 | 29.91 | 25.5  | 24.28 |
| 1058 | 133.57 | 50.08 | 29.97 | 25.53 | 24.3  |
| 1060 | 133.86 | 50.12 | 30.01 | 25.55 | 24.31 |
| 1062 | 134.25 | 50.21 | 30.08 | 25.58 | 24.35 |
| 1064 | 134.57 | 50.29 | 30.16 | 25.62 | 24.39 |
| 1066 | 134.84 | 50.3  | 30.16 | 25.6  | 24.34 |
| 1068 | 135.17 | 50.37 | 30.22 | 25.63 | 24.37 |
| 1070 | 135.48 | 50.43 | 30.28 | 25.65 | 24.39 |
| 1072 | 135.86 | 50.5  | 30.33 | 25.69 | 24.42 |
| 1074 | 136.12 | 50.5  | 30.33 | 25.65 | 24.37 |
| 1076 | 136.45 | 50.58 | 30.41 | 25.69 | 24.41 |
| 1078 | 136.71 | 50.6  | 30.43 | 25.68 | 24.39 |
| 1080 | 137.07 | 50.65 | 30.46 | 25.69 | 24.39 |
| 1082 | 137.4  | 50.76 | 30.54 | 25.76 | 24.44 |
| 1084 | 137.73 | 50.82 | 30.6  | 25.78 | 24.45 |
| 1086 | 138.07 | 50.85 | 30.62 | 25.78 | 24.43 |
| 1088 | 138.37 | 50.87 | 30.63 | 25.76 | 24.41 |
| 1090 | 138.65 | 50.91 | 30.67 | 25.76 | 24.41 |
| 1092 | 139    | 50.99 | 30.76 | 25.83 | 24.47 |
| 1094 | 139.38 | 51.06 | 30.81 | 25.86 | 24.48 |
| 1096 | 139.7  | 51.15 | 30.87 | 25.89 | 24.5  |
| 1098 | 140.02 | 51.21 | 30.94 | 25.92 | 24.53 |
| 1100 | 140.33 | 51.25 | 30.97 | 25.94 | 24.52 |
| 1102 | 140.64 | 51.29 | 31.01 | 25.94 | 24.53 |
| 1104 | 141.04 | 51.37 | 31.08 | 25.99 | 24.54 |
| 1106 | 141.36 | 51.42 | 31.13 | 26.02 | 24.57 |
| 1108 | 141.68 | 51.45 | 31.17 | 26.02 | 24.56 |
| 1110 | 142.04 | 51.49 | 31.19 | 26.02 | 24.55 |
| 1112 | 142.34 | 51.54 | 31.25 | 26.04 | 24.57 |

|      |        |       |       |       |       |
|------|--------|-------|-------|-------|-------|
| 1114 | 142.66 | 51.61 | 31.31 | 26.08 | 24.6  |
| 1116 | 142.95 | 51.65 | 31.34 | 26.07 | 24.59 |
| 1118 | 143.29 | 51.7  | 31.38 | 26.09 | 24.59 |
| 1120 | 143.58 | 51.71 | 31.39 | 26.07 | 24.55 |
| 1122 | 143.91 | 51.75 | 31.45 | 26.1  | 24.58 |
| 1124 | 144.25 | 51.81 | 31.51 | 26.13 | 24.59 |
| 1126 | 144.63 | 51.87 | 31.56 | 26.15 | 24.61 |
| 1128 | 144.95 | 51.9  | 31.59 | 26.16 | 24.61 |
| 1130 | 145.26 | 51.96 | 31.64 | 26.19 | 24.63 |
| 1132 | 145.58 | 52.04 | 31.72 | 26.24 | 24.65 |
| 1134 | 145.96 | 52.09 | 31.75 | 26.26 | 24.66 |
| 1136 | 146.26 | 52.12 | 31.78 | 26.25 | 24.65 |
| 1138 | 146.58 | 52.16 | 31.84 | 26.27 | 24.66 |
| 1140 | 146.9  | 52.2  | 31.88 | 26.29 | 24.67 |
| 1142 | 147.27 | 52.25 | 31.92 | 26.29 | 24.67 |
| 1144 | 147.58 | 52.29 | 31.96 | 26.3  | 24.68 |
| 1146 | 147.91 | 52.33 | 32.01 | 26.32 | 24.69 |
| 1148 | 148.26 | 52.41 | 32.09 | 26.39 | 24.74 |
| 1150 | 148.57 | 52.44 | 32.12 | 26.37 | 24.72 |
| 1152 | 148.93 | 52.47 | 32.15 | 26.37 | 24.72 |
| 1154 | 149.24 | 52.52 | 32.19 | 26.39 | 24.72 |
| 1156 | 149.57 | 52.57 | 32.24 | 26.42 | 24.73 |
| 1158 | 149.95 | 52.61 | 32.28 | 26.45 | 24.74 |
| 1160 | 150.32 | 52.72 | 32.39 | 26.51 | 24.8  |
| 1162 | 150.6  | 52.73 | 32.39 | 26.5  | 24.77 |
| 1164 | 150.91 | 52.76 | 32.43 | 26.5  | 24.76 |
| 1166 | 151.24 | 52.81 | 32.48 | 26.53 | 24.78 |
| 1168 | 151.62 | 52.88 | 32.53 | 26.55 | 24.79 |
| 1170 | 151.92 | 52.91 | 32.57 | 26.57 | 24.79 |
| 1172 | 152.25 | 52.96 | 32.62 | 26.6  | 24.83 |
| 1174 | 152.62 | 52.99 | 32.66 | 26.61 | 24.83 |
| 1176 | 152.99 | 53.07 | 32.74 | 26.65 | 24.85 |
| 1178 | 153.33 | 53.13 | 32.8  | 26.69 | 24.88 |
| 1180 | 153.64 | 53.14 | 32.83 | 26.69 | 24.87 |
| 1182 | 154.05 | 53.21 | 32.89 | 26.72 | 24.89 |
| 1184 | 154.39 | 53.26 | 32.93 | 26.74 | 24.9  |
| 1186 | 154.72 | 53.3  | 32.98 | 26.77 | 24.91 |
| 1188 | 155.05 | 53.35 | 33.03 | 26.79 | 24.91 |
| 1190 | 155.36 | 53.4  | 33.07 | 26.81 | 24.92 |
| 1192 | 155.72 | 53.45 | 33.12 | 26.83 | 24.93 |
| 1194 | 156.03 | 53.49 | 33.17 | 26.86 | 24.93 |
| 1196 | 156.37 | 53.53 | 33.23 | 26.88 | 24.96 |
| 1198 | 156.72 | 53.59 | 33.28 | 26.91 | 24.98 |
| 1200 | 157.1  | 53.66 | 33.34 | 26.94 | 24.99 |

|      |        |       |       |       |       |
|------|--------|-------|-------|-------|-------|
| 1202 | 157.42 | 53.69 | 33.39 | 26.96 | 25.01 |
| 1204 | 157.73 | 53.71 | 33.42 | 26.96 | 25    |
| 1206 | 158.15 | 53.78 | 33.49 | 27.01 | 25.04 |
| 1208 | 158.49 | 53.85 | 33.56 | 27.04 | 25.06 |
| 1210 | 158.81 | 53.88 | 33.59 | 27.04 | 25.04 |
| 1212 | 159.09 | 53.88 | 33.59 | 27.02 | 25.01 |
| 1214 | 159.46 | 53.92 | 33.63 | 27.03 | 25.02 |
| 1216 | 159.82 | 53.97 | 33.68 | 27.07 | 25.04 |
| 1218 | 160.16 | 54.03 | 33.75 | 27.12 | 25.06 |
| 1220 | 160.47 | 54.06 | 33.8  | 27.13 | 25.06 |
| 1222 | 160.82 | 54.1  | 33.82 | 27.14 | 25.06 |
| 1224 | 161.15 | 54.14 | 33.86 | 27.14 | 25.05 |
| 1226 | 161.48 | 54.17 | 33.9  | 27.16 | 25.05 |
| 1228 | 161.8  | 54.18 | 33.93 | 27.17 | 25.05 |
| 1230 | 162.2  | 54.26 | 34    | 27.21 | 25.08 |
| 1232 | 162.53 | 54.3  | 34.04 | 27.22 | 25.09 |
| 1234 | 162.86 | 54.34 | 34.09 | 27.24 | 25.1  |
| 1236 | 163.21 | 54.4  | 34.16 | 27.3  | 25.15 |
| 1238 | 163.52 | 54.42 | 34.2  | 27.3  | 25.13 |
| 1240 | 163.89 | 54.46 | 34.25 | 27.3  | 25.13 |
| 1242 | 164.23 | 54.53 | 34.31 | 27.37 | 25.18 |
| 1244 | 164.53 | 54.54 | 34.32 | 27.35 | 25.15 |
| 1246 | 164.89 | 54.59 | 34.38 | 27.37 | 25.16 |
| 1248 | 165.29 | 54.64 | 34.44 | 27.41 | 25.19 |
| 1250 | 165.62 | 54.67 | 34.47 | 27.42 | 25.18 |
| 1252 | 165.94 | 54.7  | 34.5  | 27.43 | 25.18 |
| 1254 | 166.33 | 54.76 | 34.55 | 27.46 | 25.19 |
| 1256 | 166.66 | 54.79 | 34.59 | 27.48 | 25.2  |
| 1258 | 166.98 | 54.84 | 34.63 | 27.49 | 25.19 |
| 1260 | 167.32 | 54.88 | 34.69 | 27.52 | 25.21 |
| 1262 | 167.63 | 54.89 | 34.71 | 27.52 | 25.19 |
| 1264 | 168.05 | 54.95 | 34.78 | 27.56 | 25.23 |
| 1266 | 168.38 | 54.99 | 34.82 | 27.58 | 25.25 |
| 1268 | 168.72 | 55.03 | 34.86 | 27.59 | 25.25 |
| 1270 | 169.06 | 55.06 | 34.91 | 27.61 | 25.26 |
| 1272 | 169.5  | 55.14 | 35    | 27.67 | 25.31 |
| 1274 | 169.8  | 55.16 | 35.03 | 27.68 | 25.3  |
| 1276 | 170.12 | 55.2  | 35.06 | 27.69 | 25.31 |
| 1278 | 170.46 | 55.25 | 35.11 | 27.73 | 25.33 |
| 1280 | 170.91 | 55.35 | 35.2  | 27.8  | 25.37 |
| 1282 | 171.26 | 55.39 | 35.24 | 27.81 | 25.38 |
| 1284 | 171.59 | 55.42 | 35.27 | 27.83 | 25.37 |
| 1286 | 171.97 | 55.46 | 35.31 | 27.85 | 25.37 |
| 1288 | 172.32 | 55.52 | 35.38 | 27.88 | 25.4  |

|      |        |       |       |       |       |
|------|--------|-------|-------|-------|-------|
| 1290 | 172.63 | 55.54 | 35.4  | 27.89 | 25.39 |
| 1292 | 173    | 55.6  | 35.46 | 27.93 | 25.43 |
| 1294 | 173.34 | 55.64 | 35.51 | 27.95 | 25.42 |
| 1296 | 173.73 | 55.67 | 35.56 | 27.96 | 25.44 |
| 1298 | 174.08 | 55.7  | 35.59 | 27.97 | 25.45 |
| 1300 | 174.42 | 55.74 | 35.63 | 27.98 | 25.45 |
| 1302 | 174.77 | 55.79 | 35.68 | 28.02 | 25.47 |
| 1304 | 175.17 | 55.84 | 35.73 | 28.05 | 25.48 |
| 1306 | 175.48 | 55.85 | 35.76 | 28.06 | 25.48 |
| 1308 | 175.84 | 55.91 | 35.81 | 28.09 | 25.5  |
| 1310 | 176.24 | 55.95 | 35.86 | 28.11 | 25.52 |
| 1312 | 176.61 | 56.04 | 35.94 | 28.17 | 25.55 |
| 1314 | 176.97 | 56.09 | 35.99 | 28.22 | 25.58 |
| 1316 | 177.33 | 56.14 | 36.04 | 28.23 | 25.58 |
| 1318 | 177.64 | 56.15 | 36.06 | 28.24 | 25.56 |
| 1320 | 178.03 | 56.18 | 36.1  | 28.25 | 25.58 |
| 1322 | 178.38 | 56.25 | 36.17 | 28.31 | 25.61 |
| 1324 | 178.73 | 56.3  | 36.22 | 28.33 | 25.63 |
| 1326 | 179.08 | 56.36 | 36.27 | 28.36 | 25.64 |
| 1328 | 179.46 | 56.37 | 36.29 | 28.36 | 25.63 |
| 1330 | 179.79 | 56.39 | 36.32 | 28.35 | 25.63 |
| 1332 | 180.14 | 56.44 | 36.38 | 28.39 | 25.65 |
| 1334 | 180.55 | 56.47 | 36.41 | 28.4  | 25.65 |
| 1336 | 180.89 | 56.5  | 36.43 | 28.41 | 25.64 |
| 1338 | 181.27 | 56.58 | 36.52 | 28.47 | 25.68 |
| 1340 | 181.63 | 56.62 | 36.57 | 28.5  | 25.71 |
| 1342 | 181.93 | 56.62 | 36.58 | 28.5  | 25.68 |
| 1344 | 182.37 | 56.71 | 36.66 | 28.56 | 25.71 |
| 1346 | 182.68 | 56.74 | 36.68 | 28.55 | 25.7  |
| 1348 | 183.02 | 56.76 | 36.7  | 28.57 | 25.7  |
| 1350 | 183.43 | 56.79 | 36.74 | 28.58 | 25.71 |
| 1352 | 183.8  | 56.86 | 36.78 | 28.6  | 25.71 |
| 1354 | 184.17 | 56.91 | 36.86 | 28.65 | 25.74 |
| 1356 | 184.51 | 56.94 | 36.89 | 28.65 | 25.75 |
| 1358 | 184.87 | 56.96 | 36.92 | 28.67 | 25.76 |
| 1360 | 185.22 | 56.99 | 36.95 | 28.66 | 25.75 |
| 1362 | 185.61 | 57.05 | 37.02 | 28.73 | 25.79 |
| 1364 | 186    | 57.12 | 37.1  | 28.78 | 25.83 |
| 1366 | 186.32 | 57.14 | 37.11 | 28.77 | 25.81 |
| 1368 | 186.75 | 57.2  | 37.17 | 28.82 | 25.84 |
| 1370 | 187.08 | 57.2  | 37.18 | 28.81 | 25.81 |
| 1372 | 187.49 | 57.29 | 37.27 | 28.88 | 25.86 |
| 1374 | 187.86 | 57.34 | 37.32 | 28.92 | 25.88 |
| 1376 | 188.23 | 57.36 | 37.34 | 28.92 | 25.86 |

|      |        |       |       |       |       |
|------|--------|-------|-------|-------|-------|
| 1378 | 188.57 | 57.41 | 37.38 | 28.95 | 25.87 |
| 1380 | 188.88 | 57.45 | 37.41 | 28.97 | 25.88 |
| 1382 | 189.33 | 57.51 | 37.48 | 29.02 | 25.92 |
| 1384 | 189.67 | 57.55 | 37.52 | 29.03 | 25.92 |
| 1386 | 190.06 | 57.59 | 37.58 | 29.06 | 25.93 |
| 1388 | 190.44 | 57.64 | 37.62 | 29.09 | 25.95 |
| 1390 | 190.85 | 57.67 | 37.65 | 29.1  | 25.95 |
| 1392 | 191.24 | 57.71 | 37.7  | 29.12 | 25.97 |
| 1394 | 191.59 | 57.74 | 37.73 | 29.14 | 25.97 |
| 1396 | 191.92 | 57.74 | 37.75 | 29.13 | 25.96 |
| 1398 | 192.32 | 57.83 | 37.83 | 29.2  | 25.99 |
| 1400 | 192.74 | 57.88 | 37.87 | 29.23 | 26.01 |
| 1402 | 193.14 | 57.95 | 37.96 | 29.29 | 26.07 |
| 1404 | 193.46 | 57.98 | 37.98 | 29.28 | 26.04 |
| 1406 | 193.86 | 58    | 38    | 29.31 | 26.04 |
| 1408 | 194.23 | 58.06 | 38.04 | 29.33 | 26.05 |
| 1410 | 194.66 | 58.15 | 38.14 | 29.41 | 26.1  |
| 1412 | 195.02 | 58.16 | 38.16 | 29.41 | 26.1  |
| 1414 | 195.42 | 58.19 | 38.18 | 29.42 | 26.08 |
| 1416 | 195.75 | 58.24 | 38.22 | 29.45 | 26.1  |
| 1418 | 196.17 | 58.29 | 38.29 | 29.49 | 26.11 |
| 1420 | 196.51 | 58.35 | 38.31 | 29.51 | 26.13 |
| 1422 | 196.89 | 58.42 | 38.39 | 29.57 | 26.18 |
| 1424 | 197.28 | 58.45 | 38.41 | 29.57 | 26.17 |
| 1426 | 197.65 | 58.49 | 38.48 | 29.61 | 26.19 |
| 1428 | 198.02 | 58.51 | 38.5  | 29.61 | 26.17 |
| 1430 | 198.41 | 58.56 | 38.54 | 29.64 | 26.19 |
| 1432 | 198.86 | 58.62 | 38.59 | 29.68 | 26.21 |
| 1434 | 199.24 | 58.66 | 38.64 | 29.7  | 26.22 |
| 1436 | 199.65 | 58.73 | 38.71 | 29.75 | 26.26 |
| 1438 | 200.08 | 58.78 | 38.74 | 29.78 | 26.26 |
| 1440 | 200.45 | 58.81 | 38.79 | 29.8  | 26.28 |
| 1442 | 200.8  | 58.87 | 38.84 | 29.84 | 26.29 |
| 1444 | 201.16 | 58.91 | 38.88 | 29.87 | 26.3  |
| 1446 | 201.56 | 58.93 | 38.89 | 29.87 | 26.28 |
| 1448 | 201.92 | 58.97 | 38.94 | 29.89 | 26.29 |
| 1450 | 202.33 | 59.04 | 39    | 29.94 | 26.33 |
| 1452 | 202.7  | 59.07 | 39.04 | 29.96 | 26.34 |
| 1454 | 203.07 | 59.11 | 39.07 | 29.97 | 26.34 |
| 1456 | 203.48 | 59.16 | 39.11 | 30.01 | 26.35 |
| 1458 | 203.82 | 59.19 | 39.13 | 30.01 | 26.33 |
| 1460 | 204.17 | 59.22 | 39.15 | 30.02 | 26.32 |
| 1462 | 204.61 | 59.26 | 39.18 | 30.04 | 26.33 |
| 1464 | 204.98 | 59.3  | 39.25 | 30.07 | 26.34 |



|      |        |       |       |       |       |
|------|--------|-------|-------|-------|-------|
| 1466 | 205.38 | 59.37 | 39.31 | 30.13 | 26.38 |
| 1468 | 205.78 | 59.42 | 39.37 | 30.16 | 26.41 |
| 1470 | 206.11 | 59.43 | 39.37 | 30.14 | 26.39 |
| 1472 | 206.55 | 59.48 | 39.42 | 30.18 | 26.41 |
| 1474 | 206.95 | 59.55 | 39.49 | 30.24 | 26.44 |
| 1476 | 207.32 | 59.62 | 39.55 | 30.28 | 26.47 |
| 1478 | 207.67 | 59.64 | 39.56 | 30.28 | 26.45 |
| 1480 | 208.08 | 59.67 | 39.59 | 30.29 | 26.46 |
| 1482 | 208.48 | 59.74 | 39.67 | 30.35 | 26.48 |
| 1484 | 208.87 | 59.8  | 39.73 | 30.4  | 26.52 |
| 1486 | 209.31 | 59.84 | 39.77 | 30.41 | 26.53 |
| 1488 | 209.71 | 59.91 | 39.82 | 30.44 | 26.55 |
| 1490 | 210.06 | 59.9  | 39.83 | 30.44 | 26.53 |
| 1492 | 210.43 | 59.96 | 39.88 | 30.48 | 26.55 |
| 1494 | 210.86 | 60.03 | 39.92 | 30.52 | 26.58 |
| 1496 | 211.22 | 60.06 | 39.97 | 30.54 | 26.58 |
| 1498 | 211.62 | 60.12 | 40.05 | 30.58 | 26.61 |
| 1500 | 211.98 | 60.14 | 40.06 | 30.6  | 26.62 |
| 1502 | 212.36 | 60.17 | 40.1  | 30.62 | 26.61 |
| 1504 | 212.8  | 60.21 | 40.13 | 30.63 | 26.61 |
| 1506 | 213.18 | 60.25 | 40.17 | 30.66 | 26.63 |
| 1508 | 213.56 | 60.3  | 40.21 | 30.69 | 26.64 |
| 1510 | 214    | 60.34 | 40.26 | 30.72 | 26.66 |
| 1512 | 214.38 | 60.41 | 40.33 | 30.76 | 26.69 |
| 1514 | 214.73 | 60.42 | 40.35 | 30.77 | 26.69 |
| 1516 | 215.1  | 60.46 | 40.39 | 30.8  | 26.69 |
| 1518 | 215.59 | 60.52 | 40.45 | 30.84 | 26.72 |
| 1520 | 215.95 | 60.55 | 40.48 | 30.85 | 26.72 |
| 1522 | 216.33 | 60.6  | 40.52 | 30.89 | 26.73 |
| 1524 | 216.74 | 60.66 | 40.59 | 30.94 | 26.78 |
| 1526 | 217.14 | 60.7  | 40.63 | 30.95 | 26.79 |
| 1528 | 217.57 | 60.75 | 40.69 | 31    | 26.8  |
| 1530 | 217.92 | 60.79 | 40.73 | 31.03 | 26.8  |
| 1532 | 218.3  | 60.84 | 40.77 | 31.06 | 26.82 |
| 1534 | 218.75 | 60.88 | 40.81 | 31.09 | 26.84 |
| 1536 | 219.13 | 60.92 | 40.86 | 31.11 | 26.84 |
| 1538 | 219.52 | 60.96 | 40.9  | 31.14 | 26.85 |
| 1540 | 219.89 | 60.99 | 40.93 | 31.15 | 26.85 |
| 1542 | 220.26 | 61.04 | 40.98 | 31.19 | 26.87 |
| 1544 | 220.64 | 61.04 | 40.99 | 31.16 | 26.84 |
| 1546 | 221.02 | 61.09 | 41.03 | 31.2  | 26.86 |
| 1548 | 221.36 | 61.09 | 41.06 | 31.22 | 26.86 |
| 1550 | 221.76 | 61.16 | 41.11 | 31.25 | 26.87 |
| 1552 | 222.16 | 61.18 | 41.12 | 31.26 | 26.87 |

|      |        |       |       |       |       |
|------|--------|-------|-------|-------|-------|
| 1554 | 222.53 | 61.22 | 41.18 | 31.29 | 26.88 |
| 1556 | 222.9  | 61.26 | 41.21 | 31.31 | 26.89 |
| 1558 | 223.28 | 61.3  | 41.24 | 31.34 | 26.9  |
| 1560 | 223.74 | 61.38 | 41.31 | 31.4  | 26.92 |
| 1562 | 224.1  | 61.43 | 41.36 | 31.43 | 26.95 |
| 1564 | 224.44 | 61.44 | 41.37 | 31.44 | 26.93 |
| 1566 | 224.89 | 61.48 | 41.42 | 31.46 | 26.94 |
| 1568 | 225.28 | 61.52 | 41.46 | 31.49 | 26.95 |
| 1570 | 225.7  | 61.58 | 41.53 | 31.55 | 26.99 |
| 1572 | 226.09 | 61.63 | 41.58 | 31.58 | 27.01 |
| 1574 | 226.45 | 61.67 | 41.62 | 31.6  | 27.01 |
| 1576 | 226.88 | 61.71 | 41.66 | 31.63 | 27.03 |
| 1578 | 227.27 | 61.77 | 41.74 | 31.68 | 27.07 |
| 1580 | 227.65 | 61.8  | 41.78 | 31.71 | 27.08 |
| 1582 | 228    | 61.83 | 41.8  | 31.71 | 27.06 |
| 1584 | 228.46 | 61.89 | 41.85 | 31.76 | 27.09 |
| 1586 | 228.86 | 61.93 | 41.89 | 31.79 | 27.11 |
| 1588 | 229.21 | 61.94 | 41.91 | 31.79 | 27.09 |
| 1590 | 229.65 | 61.98 | 41.95 | 31.82 | 27.1  |
| 1592 | 229.99 | 61.99 | 41.96 | 31.83 | 27.07 |
| 1594 | 230.39 | 62.05 | 42.03 | 31.89 | 27.12 |
| 1596 | 230.8  | 62.13 | 42.1  | 31.93 | 27.15 |
| 1598 | 231.19 | 62.15 | 42.11 | 31.93 | 27.13 |
| 1600 | 231.62 | 62.2  | 42.19 | 31.98 | 27.17 |
| 1602 | 232    | 62.22 | 42.2  | 32    | 27.15 |
| 1604 | 232.38 | 62.25 | 42.25 | 32.02 | 27.17 |
| 1606 | 232.78 | 62.31 | 42.3  | 32.06 | 27.2  |
| 1608 | 233.2  | 62.33 | 42.31 | 32.06 | 27.18 |
| 1610 | 233.65 | 62.4  | 42.41 | 32.13 | 27.24 |
| 1612 | 234.02 | 62.41 | 42.45 | 32.15 | 27.25 |
| 1614 | 234.41 | 62.41 | 42.44 | 32.14 | 27.22 |
| 1616 | 234.8  | 62.49 | 42.51 | 32.2  | 27.26 |
| 1618 | 235.2  | 62.54 | 42.57 | 32.25 | 27.29 |
| 1620 | 235.6  | 62.57 | 42.6  | 32.27 | 27.29 |
| 1622 | 236.08 | 62.63 | 42.66 | 32.33 | 27.31 |
| 1624 | 236.46 | 62.66 | 42.68 | 32.34 | 27.31 |
| 1626 | 236.85 | 62.71 | 42.73 | 32.38 | 27.33 |
| 1628 | 237.2  | 62.74 | 42.76 | 32.39 | 27.33 |
| 1630 | 237.68 | 62.79 | 42.82 | 32.45 | 27.37 |
| 1632 | 238.04 | 62.83 | 42.88 | 32.48 | 27.38 |
| 1634 | 238.41 | 62.84 | 42.9  | 32.48 | 27.38 |
| 1636 | 238.84 | 62.9  | 42.96 | 32.53 | 27.4  |
| 1638 | 239.26 | 62.95 | 43.02 | 32.58 | 27.44 |
| 1640 | 239.73 | 62.99 | 43.06 | 32.61 | 27.46 |

|      |        |       |       |       |       |
|------|--------|-------|-------|-------|-------|
| 1642 | 240.12 | 63.03 | 43.11 | 32.64 | 27.47 |
| 1644 | 240.47 | 63.03 | 43.12 | 32.64 | 27.45 |
| 1646 | 240.95 | 63.09 | 43.18 | 32.69 | 27.49 |
| 1648 | 241.31 | 63.11 | 43.2  | 32.7  | 27.48 |
| 1650 | 241.71 | 63.16 | 43.26 | 32.75 | 27.52 |
| 1652 | 242.12 | 63.21 | 43.31 | 32.79 | 27.53 |
| 1654 | 242.59 | 63.26 | 43.36 | 32.83 | 27.54 |
| 1656 | 242.99 | 63.29 | 43.4  | 32.85 | 27.55 |
| 1658 | 243.41 | 63.34 | 43.44 | 32.9  | 27.57 |
| 1660 | 243.78 | 63.37 | 43.48 | 32.91 | 27.58 |
| 1662 | 244.22 | 63.41 | 43.51 | 32.94 | 27.59 |
| 1664 | 244.6  | 63.43 | 43.55 | 32.96 | 27.59 |
| 1666 | 244.98 | 63.46 | 43.59 | 32.98 | 27.62 |
| 1668 | 245.42 | 63.5  | 43.64 | 33.02 | 27.64 |
| 1670 | 245.9  | 63.56 | 43.71 | 33.07 | 27.66 |
| 1672 | 246.28 | 63.56 | 43.72 | 33.07 | 27.64 |
| 1674 | 246.69 | 63.61 | 43.77 | 33.11 | 27.66 |
| 1676 | 247.08 | 63.64 | 43.79 | 33.14 | 27.67 |
| 1678 | 247.58 | 63.7  | 43.86 | 33.19 | 27.7  |
| 1680 | 247.92 | 63.71 | 43.88 | 33.2  | 27.68 |
| 1682 | 248.29 | 63.75 | 43.92 | 33.23 | 27.69 |
| 1684 | 248.69 | 63.78 | 43.95 | 33.26 | 27.7  |
| 1686 | 249.11 | 63.82 | 44    | 33.3  | 27.71 |
| 1688 | 249.6  | 63.86 | 44.05 | 33.33 | 27.73 |
| 1690 | 250.03 | 63.89 | 44.09 | 33.36 | 27.74 |
| 1692 | 250.45 | 63.94 | 44.14 | 33.4  | 27.76 |
| 1694 | 250.82 | 63.94 | 44.15 | 33.41 | 27.75 |
| 1696 | 251.28 | 63.99 | 44.2  | 33.44 | 27.76 |
| 1698 | 251.68 | 64.03 | 44.25 | 33.48 | 27.8  |
| 1700 | 252.07 | 64.04 | 44.29 | 33.5  | 27.8  |
| 1702 | 252.51 | 64.09 | 44.33 | 33.53 | 27.79 |
| 1704 | 252.92 | 64.12 | 44.36 | 33.56 | 27.81 |
| 1706 | 253.34 | 64.14 | 44.38 | 33.57 | 27.8  |
| 1708 | 253.78 | 64.19 | 44.44 | 33.62 | 27.82 |
| 1710 | 254.25 | 64.22 | 44.46 | 33.65 | 27.82 |
| 1712 | 254.66 | 64.28 | 44.53 | 33.71 | 27.85 |
| 1714 | 255.02 | 64.29 | 44.54 | 33.71 | 27.84 |
| 1716 | 255.42 | 64.35 | 44.6  | 33.77 | 27.88 |
| 1718 | 255.86 | 64.41 | 44.67 | 33.82 | 27.91 |
| 1720 | 256.34 | 64.44 | 44.72 | 33.85 | 27.92 |
| 1722 | 256.74 | 64.46 | 44.76 | 33.88 | 27.94 |
| 1724 | 257.16 | 64.5  | 44.79 | 33.9  | 27.94 |
| 1726 | 257.61 | 64.51 | 44.81 | 33.91 | 27.94 |
| 1728 | 258.02 | 64.55 | 44.86 | 33.94 | 27.96 |

|      |        |       |       |       |       |
|------|--------|-------|-------|-------|-------|
| 1730 | 258.43 | 64.58 | 44.91 | 33.98 | 27.97 |
| 1732 | 258.83 | 64.61 | 44.95 | 34.01 | 27.98 |
| 1734 | 259.28 | 64.63 | 44.98 | 34.02 | 27.97 |
| 1736 | 259.69 | 64.68 | 45.01 | 34.06 | 28    |
| 1738 | 260.11 | 64.71 | 45.06 | 34.1  | 28.01 |
| 1740 | 260.53 | 64.75 | 45.1  | 34.14 | 28.03 |
| 1742 | 260.95 | 64.78 | 45.14 | 34.17 | 28.03 |
| 1744 | 261.43 | 64.81 | 45.18 | 34.2  | 28.04 |
| 1746 | 261.82 | 64.85 | 45.22 | 34.23 | 28.05 |
| 1748 | 262.23 | 64.9  | 45.26 | 34.28 | 28.08 |
| 1750 | 262.61 | 64.92 | 45.29 | 34.29 | 28.08 |
| 1752 | 263.07 | 64.96 | 45.34 | 34.34 | 28.1  |
| 1754 | 263.47 | 64.97 | 45.36 | 34.34 | 28.1  |
| 1756 | 263.88 | 64.98 | 45.38 | 34.34 | 28.08 |
| 1758 | 264.4  | 65.04 | 45.46 | 34.41 | 28.14 |
| 1760 | 264.81 | 65.05 | 45.48 | 34.43 | 28.13 |
| 1762 | 265.24 | 65.11 | 45.54 | 34.46 | 28.15 |
| 1764 | 265.66 | 65.13 | 45.57 | 34.49 | 28.17 |
| 1766 | 266.14 | 65.17 | 45.63 | 34.54 | 28.19 |
| 1768 | 266.51 | 65.19 | 45.66 | 34.56 | 28.19 |
| 1770 | 266.92 | 65.24 | 45.7  | 34.6  | 28.19 |
| 1772 | 267.37 | 65.3  | 45.77 | 34.67 | 28.25 |
| 1774 | 267.85 | 65.33 | 45.8  | 34.69 | 28.24 |
| 1776 | 268.26 | 65.34 | 45.82 | 34.71 | 28.25 |
| 1778 | 268.71 | 65.4  | 45.88 | 34.75 | 28.27 |
| 1780 | 269.09 | 65.41 | 45.89 | 34.76 | 28.25 |
| 1782 | 269.58 | 65.47 | 45.95 | 34.81 | 28.3  |
| 1784 | 269.98 | 65.5  | 45.97 | 34.83 | 28.3  |
| 1786 | 270.38 | 65.54 | 46.03 | 34.87 | 28.32 |
| 1788 | 270.81 | 65.56 | 46.07 | 34.9  | 28.33 |
| 1790 | 271.24 | 65.59 | 46.11 | 34.93 | 28.34 |
| 1792 | 271.74 | 65.62 | 46.15 | 34.97 | 28.36 |
| 1794 | 272.15 | 65.66 | 46.19 | 35    | 28.37 |
| 1796 | 272.56 | 65.7  | 46.22 | 35.02 | 28.37 |
| 1798 | 273.02 | 65.73 | 46.26 | 35.06 | 28.39 |
| 1800 | 273.43 | 65.78 | 46.3  | 35.1  | 28.41 |
| 1802 | 273.83 | 65.79 | 46.33 | 35.12 | 28.4  |
| 1804 | 274.26 | 65.81 | 46.37 | 35.15 | 28.42 |
| 1806 | 274.73 | 65.83 | 46.41 | 35.16 | 28.41 |
| 1808 | 275.18 | 65.86 | 46.45 | 35.2  | 28.43 |
| 1810 | 275.62 | 65.9  | 46.49 | 35.24 | 28.45 |
| 1812 | 276.03 | 65.94 | 46.52 | 35.27 | 28.46 |
| 1814 | 276.44 | 65.97 | 46.55 | 35.3  | 28.47 |
| 1816 | 276.91 | 66.02 | 46.61 | 35.35 | 28.49 |

|      |        |       |       |       |       |
|------|--------|-------|-------|-------|-------|
| 1818 | 277.29 | 66.04 | 46.64 | 35.37 | 28.5  |
| 1820 | 277.72 | 66.06 | 46.68 | 35.4  | 28.52 |
| 1822 | 278.15 | 66.08 | 46.71 | 35.41 | 28.52 |
| 1824 | 278.67 | 66.11 | 46.75 | 35.44 | 28.53 |
| 1826 | 279.13 | 66.16 | 46.8  | 35.49 | 28.56 |
| 1828 | 279.55 | 66.17 | 46.83 | 35.5  | 28.56 |
| 1830 | 279.99 | 66.21 | 46.87 | 35.54 | 28.57 |
| 1832 | 280.45 | 66.23 | 46.9  | 35.56 | 28.58 |
| 1834 | 280.85 | 66.26 | 46.93 | 35.59 | 28.6  |
| 1836 | 281.28 | 66.3  | 46.98 | 35.64 | 28.61 |
| 1838 | 281.67 | 66.31 | 47    | 35.65 | 28.62 |
| 1840 | 282.17 | 66.33 | 47.04 | 35.68 | 28.63 |
| 1842 | 282.62 | 66.36 | 47.08 | 35.72 | 28.64 |
| 1844 | 283.04 | 66.38 | 47.11 | 35.74 | 28.64 |
| 1846 | 283.47 | 66.4  | 47.14 | 35.76 | 28.66 |
| 1848 | 283.97 | 66.44 | 47.18 | 35.79 | 28.68 |
| 1850 | 284.42 | 66.48 | 47.25 | 35.85 | 28.73 |
| 1852 | 284.82 | 66.48 | 47.26 | 35.85 | 28.7  |
| 1854 | 285.29 | 66.51 | 47.29 | 35.89 | 28.72 |
| 1856 | 285.7  | 66.55 | 47.33 | 35.92 | 28.73 |
| 1858 | 286.14 | 66.58 | 47.36 | 35.95 | 28.74 |
| 1860 | 286.58 | 66.61 | 47.4  | 35.98 | 28.75 |
| 1862 | 287.04 | 66.65 | 47.45 | 36.03 | 28.78 |
| 1864 | 287.56 | 66.7  | 47.5  | 36.08 | 28.8  |
| 1866 | 287.94 | 66.7  | 47.51 | 36.08 | 28.78 |
| 1868 | 288.35 | 66.73 | 47.54 | 36.11 | 28.8  |
| 1870 | 288.79 | 66.8  | 47.6  | 36.16 | 28.82 |
| 1872 | 289.25 | 66.76 | 47.6  | 36.16 | 28.8  |
| 1874 | 289.72 | 66.83 | 47.67 | 36.2  | 28.85 |
| 1876 | 290.16 | 66.86 | 47.69 | 36.24 | 28.85 |
| 1878 | 290.63 | 66.91 | 47.77 | 36.31 | 28.91 |
| 1880 | 291.13 | 66.94 | 47.8  | 36.33 | 28.92 |
| 1882 | 291.52 | 66.94 | 47.81 | 36.34 | 28.92 |
| 1884 | 291.93 | 66.94 | 47.83 | 36.35 | 28.91 |
| 1886 | 292.41 | 66.97 | 47.87 | 36.38 | 28.91 |
| 1888 | 292.81 | 66.99 | 47.89 | 36.4  | 28.91 |
| 1890 | 293.25 | 67.02 | 47.92 | 36.43 | 28.93 |
| 1892 | 293.72 | 67.07 | 47.99 | 36.5  | 28.98 |
| 1894 | 294.2  | 67.13 | 48.05 | 36.55 | 29.02 |
| 1896 | 294.7  | 67.16 | 48.08 | 36.58 | 29.03 |
| 1898 | 295.12 | 67.18 | 48.11 | 36.6  | 29.02 |
| 1900 | 295.5  | 67.18 | 48.11 | 36.61 | 28.99 |
| 1902 | 295.96 | 67.2  | 48.13 | 36.63 | 29    |
| 1904 | 296.42 | 67.28 | 48.2  | 36.71 | 29.05 |

|      |        |       |       |       |       |
|------|--------|-------|-------|-------|-------|
| 1906 | 296.86 | 67.29 | 48.25 | 36.73 | 29.07 |
| 1908 | 297.33 | 67.33 | 48.3  | 36.78 | 29.09 |
| 1910 | 297.84 | 67.36 | 48.34 | 36.81 | 29.1  |
| 1912 | 298.28 | 67.38 | 48.37 | 36.83 | 29.11 |
| 1914 | 298.71 | 67.4  | 48.4  | 36.85 | 29.13 |
| 1916 | 299.14 | 67.42 | 48.44 | 36.88 | 29.14 |
| 1918 | 299.63 | 67.46 | 48.48 | 36.92 | 29.16 |
| 1920 | 300    | 67.46 | 48.49 | 36.92 | 29.14 |
| 1922 | 300.45 | 67.51 | 48.54 | 36.98 | 29.17 |
| 1924 | 300.89 | 67.54 | 48.57 | 37.01 | 29.19 |
| 1926 | 301.36 | 67.56 | 48.6  | 37.04 | 29.19 |
| 1928 | 301.88 | 67.57 | 48.63 | 37.06 | 29.19 |
| 1930 | 302.33 | 67.62 | 48.67 | 37.11 | 29.21 |
| 1932 | 302.74 | 67.64 | 48.71 | 37.13 | 29.22 |
| 1934 | 303.25 | 67.7  | 48.76 | 37.18 | 29.24 |
| 1936 | 303.66 | 67.72 | 48.79 | 37.21 | 29.26 |
| 1938 | 304.07 | 67.74 | 48.83 | 37.24 | 29.27 |
| 1940 | 304.51 | 67.75 | 48.85 | 37.25 | 29.28 |
| 1942 | 304.95 | 67.79 | 48.89 | 37.29 | 29.31 |
| 1944 | 305.52 | 67.83 | 48.95 | 37.35 | 29.34 |
| 1946 | 305.98 | 67.86 | 48.99 | 37.38 | 29.36 |
| 1948 | 306.39 | 67.86 | 48.99 | 37.39 | 29.35 |
| 1950 | 306.86 | 67.91 | 49.07 | 37.43 | 29.38 |
| 1952 | 307.33 | 67.92 | 49.1  | 37.45 | 29.4  |
| 1954 | 307.73 | 67.92 | 49.09 | 37.46 | 29.38 |
| 1956 | 308.14 | 67.94 | 49.12 | 37.49 | 29.39 |
| 1958 | 308.65 | 67.98 | 49.15 | 37.53 | 29.4  |
| 1960 | 309.14 | 68.06 | 49.25 | 37.6  | 29.45 |
| 1962 | 309.6  | 68.1  | 49.29 | 37.65 | 29.48 |
| 1964 | 310.05 | 68.12 | 49.32 | 37.68 | 29.5  |
| 1966 | 310.56 | 68.15 | 49.35 | 37.71 | 29.51 |
| 1968 | 310.94 | 68.16 | 49.37 | 37.73 | 29.5  |
| 1970 | 311.37 | 68.19 | 49.39 | 37.75 | 29.53 |
| 1972 | 311.77 | 68.21 | 49.42 | 37.77 | 29.53 |
| 1974 | 312.18 | 68.19 | 49.41 | 37.76 | 29.51 |
| 1976 | 312.7  | 68.21 | 49.45 | 37.79 | 29.52 |
| 1978 | 313.16 | 68.24 | 49.49 | 37.83 | 29.53 |
| 1980 | 313.63 | 68.3  | 49.55 | 37.88 | 29.56 |
| 1982 | 314.05 | 68.31 | 49.58 | 37.91 | 29.58 |
| 1984 | 314.56 | 68.31 | 49.59 | 37.92 | 29.58 |
| 1986 | 315.01 | 68.36 | 49.65 | 37.97 | 29.62 |
| 1988 | 315.4  | 68.37 | 49.66 | 37.99 | 29.6  |
| 1990 | 315.91 | 68.42 | 49.71 | 38.04 | 29.65 |
| 1992 | 316.32 | 68.43 | 49.74 | 38.06 | 29.63 |

|      |        |       |       |       |       |
|------|--------|-------|-------|-------|-------|
| 1994 | 316.78 | 68.46 | 49.77 | 38.09 | 29.63 |
| 1996 | 317.29 | 68.53 | 49.85 | 38.17 | 29.71 |
| 1998 | 317.82 | 68.55 | 49.88 | 38.19 | 29.72 |
| 2000 | 318.27 | 68.59 | 49.93 | 38.23 | 29.73 |
| 2002 | 318.68 | 68.61 | 49.95 | 38.27 | 29.75 |
| 2004 | 319.1  | 68.66 | 49.99 | 38.3  | 29.76 |
| 2006 | 319.47 | 68.64 | 49.98 | 38.28 | 29.73 |
| 2008 | 319.99 | 68.69 | 50.05 | 38.33 | 29.77 |
| 2010 | 320.46 | 68.71 | 50.08 | 38.37 | 29.8  |
| 2012 | 320.9  | 68.71 | 50.1  | 38.4  | 29.81 |
| 2014 | 321.43 | 68.75 | 50.12 | 38.4  | 29.8  |
| 2016 | 321.87 | 68.74 | 50.13 | 38.41 | 29.79 |
| 2018 | 322.29 | 68.76 | 50.15 | 38.43 | 29.8  |
| 2020 | 322.75 | 68.81 | 50.23 | 38.51 | 29.85 |
| 2022 | 323.25 | 68.86 | 50.26 | 38.53 | 29.85 |
| 2024 | 323.68 | 68.9  | 50.32 | 38.59 | 29.89 |
| 2026 | 324.12 | 68.93 | 50.35 | 38.62 | 29.9  |
| 2028 | 324.54 | 68.94 | 50.36 | 38.64 | 29.91 |
| 2030 | 325.02 | 68.98 | 50.41 | 38.68 | 29.93 |
| 2032 | 325.56 | 69.03 | 50.46 | 38.73 | 29.96 |
| 2034 | 326    | 69.04 | 50.49 | 38.76 | 29.96 |
| 2036 | 326.42 | 69.07 | 50.51 | 38.79 | 29.97 |
| 2038 | 326.92 | 69.1  | 50.54 | 38.81 | 29.98 |
| 2040 | 327.34 | 69.13 | 50.57 | 38.85 | 29.99 |
| 2042 | 327.77 | 69.15 | 50.62 | 38.9  | 30.02 |
| 2044 | 328.2  | 69.17 | 50.64 | 38.91 | 30.02 |
| 2046 | 328.65 | 69.19 | 50.68 | 38.94 | 30.03 |
| 2048 | 329.18 | 69.22 | 50.72 | 38.97 | 30.05 |
| 2050 | 329.62 | 69.25 | 50.74 | 39    | 30.06 |
| 2052 | 330.06 | 69.27 | 50.77 | 39.02 | 30.08 |
| 2054 | 330.49 | 69.28 | 50.81 | 39.05 | 30.08 |
| 2056 | 330.94 | 69.27 | 50.8  | 39.03 | 30.06 |
| 2058 | 331.36 | 69.3  | 50.84 | 39.07 | 30.09 |
| 2060 | 331.79 | 69.34 | 50.86 | 39.1  | 30.09 |
| 2062 | 332.3  | 69.37 | 50.89 | 39.14 | 30.1  |
| 2064 | 332.8  | 69.43 | 50.96 | 39.21 | 30.15 |
| 2066 | 333.26 | 69.46 | 50.98 | 39.22 | 30.15 |
| 2068 | 333.67 | 69.44 | 50.99 | 39.23 | 30.13 |
| 2070 | 334.1  | 69.46 | 51.01 | 39.25 | 30.13 |
| 2072 | 334.61 | 69.51 | 51.04 | 39.28 | 30.15 |
| 2074 | 335.03 | 69.55 | 51.1  | 39.34 | 30.2  |
| 2076 | 335.43 | 69.55 | 51.11 | 39.34 | 30.18 |
| 2078 | 335.93 | 69.56 | 51.13 | 39.35 | 30.18 |
| 2080 | 336.42 | 69.61 | 51.18 | 39.4  | 30.21 |

|      |        |       |       |       |       |
|------|--------|-------|-------|-------|-------|
| 2082 | 336.89 | 69.65 | 51.24 | 39.47 | 30.24 |
| 2084 | 337.32 | 69.65 | 51.24 | 39.47 | 30.22 |
| 2086 | 337.85 | 69.67 | 51.27 | 39.49 | 30.23 |
| 2088 | 338.29 | 69.68 | 51.3  | 39.51 | 30.25 |
| 2090 | 338.75 | 69.74 | 51.37 | 39.58 | 30.3  |
| 2092 | 339.17 | 69.77 | 51.4  | 39.62 | 30.31 |
| 2094 | 339.57 | 69.8  | 51.42 | 39.65 | 30.3  |
| 2096 | 340.11 | 69.84 | 51.45 | 39.69 | 30.33 |
| 2098 | 340.59 | 69.88 | 51.5  | 39.73 | 30.35 |
| 2100 | 341.05 | 69.89 | 51.52 | 39.75 | 30.35 |
| 2102 | 341.49 | 69.92 | 51.54 | 39.76 | 30.34 |
| 2104 | 342.03 | 69.97 | 51.59 | 39.81 | 30.37 |
| 2106 | 342.43 | 69.98 | 51.61 | 39.83 | 30.38 |
| 2108 | 342.83 | 69.99 | 51.62 | 39.85 | 30.37 |
| 2110 | 343.33 | 70.02 | 51.66 | 39.88 | 30.39 |
| 2112 | 343.76 | 70.06 | 51.7  | 39.92 | 30.42 |
| 2114 | 344.22 | 70.09 | 51.74 | 39.96 | 30.44 |
| 2116 | 344.68 | 70.12 | 51.77 | 39.98 | 30.45 |
| 2118 | 345.13 | 70.15 | 51.8  | 40.02 | 30.47 |
| 2120 | 345.65 | 70.18 | 51.84 | 40.05 | 30.48 |
| 2122 | 346.09 | 70.19 | 51.87 | 40.08 | 30.49 |
| 2124 | 346.52 | 70.21 | 51.89 | 40.1  | 30.5  |
| 2126 | 346.94 | 70.24 | 51.93 | 40.13 | 30.52 |
| 2128 | 347.43 | 70.27 | 51.95 | 40.16 | 30.52 |
| 2130 | 347.86 | 70.29 | 51.98 | 40.19 | 30.54 |
| 2132 | 348.33 | 70.32 | 52.01 | 40.22 | 30.55 |
| 2134 | 348.81 | 70.35 | 52.04 | 40.26 | 30.56 |
| 2136 | 349.33 | 70.36 | 52.06 | 40.27 | 30.56 |
| 2138 | 349.75 | 70.34 | 52.05 | 40.27 | 30.53 |
| 2140 | 350.22 | 70.4  | 52.11 | 40.34 | 30.58 |
| 2142 | 350.64 | 70.43 | 52.16 | 40.38 | 30.61 |
| 2144 | 351.13 | 70.47 | 52.2  | 40.41 | 30.62 |
| 2146 | 351.55 | 70.5  | 52.23 | 40.44 | 30.64 |
| 2148 | 351.99 | 70.54 | 52.26 | 40.47 | 30.65 |
| 2150 | 352.53 | 70.55 | 52.28 | 40.5  | 30.66 |
| 2152 | 352.99 | 70.59 | 52.31 | 40.53 | 30.67 |
| 2154 | 353.44 | 70.61 | 52.35 | 40.56 | 30.69 |
| 2156 | 353.89 | 70.66 | 52.4  | 40.61 | 30.72 |
| 2158 | 354.42 | 70.7  | 52.46 | 40.66 | 30.76 |
| 2160 | 354.81 | 70.73 | 52.48 | 40.69 | 30.78 |
| 2162 | 355.19 | 70.74 | 52.5  | 40.7  | 30.76 |
| 2164 | 355.65 | 70.77 | 52.53 | 40.75 | 30.8  |
| 2166 | 356.09 | 70.78 | 52.54 | 40.74 | 30.78 |
| 2168 | 356.62 | 70.8  | 52.57 | 40.77 | 30.8  |



|      |        |       |       |       |       |
|------|--------|-------|-------|-------|-------|
| 2170 | 357.08 | 70.8  | 52.59 | 40.79 | 30.8  |
| 2172 | 357.54 | 70.85 | 52.64 | 40.84 | 30.83 |
| 2174 | 358.02 | 70.86 | 52.66 | 40.85 | 30.83 |
| 2176 | 358.43 | 70.88 | 52.68 | 40.87 | 30.84 |
| 2178 | 358.84 | 70.9  | 52.71 | 40.89 | 30.84 |
| 2180 | 359.28 | 70.93 | 52.75 | 40.94 | 30.88 |
| 2182 | 359.7  | 70.96 | 52.77 | 40.96 | 30.88 |
| 2184 | 360.24 | 70.98 | 52.8  | 40.98 | 30.88 |
| 2186 | 360.77 | 71.06 | 52.87 | 41.07 | 30.96 |
| 2188 | 361.23 | 71.08 | 52.91 | 41.1  | 30.96 |
| 2190 | 361.64 | 71.06 | 52.89 | 41.09 | 30.92 |
| 2192 | 362.17 | 71.12 | 52.96 | 41.14 | 30.96 |
| 2194 | 362.56 | 71.15 | 52.97 | 41.17 | 30.97 |
| 2196 | 362.95 | 71.17 | 52.99 | 41.2  | 30.99 |
| 2198 | 363.41 | 71.21 | 53.03 | 41.23 | 31    |
| 2200 | 363.91 | 71.2  | 53.04 | 41.23 | 30.98 |
| 2202 | 364.39 | 71.24 | 53.1  | 41.29 | 31.02 |
| 2204 | 364.83 | 71.25 | 53.11 | 41.29 | 31.02 |
| 2206 | 365.35 | 71.27 | 53.13 | 41.31 | 31.02 |
| 2208 | 365.78 | 71.3  | 53.17 | 41.34 | 31.05 |
| 2210 | 366.21 | 71.33 | 53.2  | 41.39 | 31.05 |
| 2212 | 366.64 | 71.35 | 53.24 | 41.4  | 31.07 |
| 2214 | 367.04 | 71.36 | 53.27 | 41.44 | 31.09 |
| 2216 | 367.52 | 71.39 | 53.27 | 41.45 | 31.09 |
| 2218 | 367.98 | 71.42 | 53.3  | 41.48 | 31.1  |
| 2220 | 368.45 | 71.44 | 53.32 | 41.51 | 31.1  |
| 2222 | 368.93 | 71.49 | 53.38 | 41.56 | 31.14 |
| 2224 | 369.46 | 71.52 | 53.41 | 41.59 | 31.13 |
| 2226 | 369.89 | 71.57 | 53.46 | 41.64 | 31.18 |
| 2228 | 370.31 | 71.61 | 53.5  | 41.67 | 31.19 |
| 2230 | 370.77 | 71.64 | 53.53 | 41.72 | 31.22 |
| 2232 | 371.19 | 71.67 | 53.56 | 41.75 | 31.23 |
| 2234 | 371.6  | 71.64 | 53.55 | 41.73 | 31.21 |
| 2236 | 372.06 | 71.67 | 53.6  | 41.77 | 31.22 |
| 2238 | 372.6  | 71.7  | 53.63 | 41.81 | 31.26 |
| 2240 | 373.03 | 71.71 | 53.65 | 41.82 | 31.26 |
| 2242 | 373.45 | 71.71 | 53.65 | 41.82 | 31.24 |
| 2244 | 373.87 | 71.75 | 53.69 | 41.85 | 31.26 |
| 2246 | 374.31 | 71.79 | 53.75 | 41.91 | 31.3  |
| 2248 | 374.78 | 71.84 | 53.8  | 41.95 | 31.32 |
| 2250 | 375.17 | 71.85 | 53.8  | 41.96 | 31.3  |
| 2252 | 375.61 | 71.85 | 53.81 | 41.98 | 31.31 |
| 2254 | 376.18 | 71.91 | 53.85 | 42.02 | 31.32 |
| 2256 | 376.66 | 71.96 | 53.92 | 42.08 | 31.37 |

|      |        |       |       |       |       |
|------|--------|-------|-------|-------|-------|
| 2258 | 377.09 | 71.98 | 53.94 | 42.11 | 31.37 |
| 2260 | 377.5  | 71.99 | 53.95 | 42.11 | 31.38 |
| 2262 | 377.9  | 72.01 | 53.96 | 42.13 | 31.38 |
| 2264 | 378.38 | 72.07 | 54.02 | 42.19 | 31.41 |
| 2266 | 378.79 | 72.08 | 54.06 | 42.23 | 31.44 |
| 2268 | 379.18 | 72.09 | 54.05 | 42.22 | 31.43 |
| 2270 | 379.71 | 72.13 | 54.1  | 42.27 | 31.46 |
| 2272 | 380.17 | 72.17 | 54.12 | 42.3  | 31.48 |
| 2274 | 380.6  | 72.19 | 54.15 | 42.32 | 31.47 |
| 2276 | 381.03 | 72.2  | 54.18 | 42.33 | 31.47 |
| 2278 | 381.43 | 72.22 | 54.21 | 42.36 | 31.49 |
| 2280 | 381.93 | 72.31 | 54.28 | 42.42 | 31.54 |
| 2282 | 382.28 | 72.31 | 54.28 | 42.45 | 31.54 |
| 2284 | 382.68 | 72.33 | 54.3  | 42.48 | 31.55 |
| 2286 | 383.13 | 72.36 | 54.34 | 42.51 | 31.56 |
| 2288 | 383.69 | 72.4  | 54.38 | 42.56 | 31.59 |
| 2290 | 384.13 | 72.41 | 54.39 | 42.56 | 31.58 |
| 2292 | 384.57 | 72.42 | 54.4  | 42.57 | 31.57 |
| 2294 | 385.07 | 72.46 | 54.44 | 42.62 | 31.6  |
| 2296 | 385.48 | 72.51 | 54.48 | 42.66 | 31.62 |
| 2298 | 385.86 | 72.51 | 54.5  | 42.68 | 31.63 |
| 2300 | 386.24 | 72.53 | 54.53 | 42.7  | 31.64 |
| 2302 | 386.69 | 72.55 | 54.55 | 42.71 | 31.65 |
| 2304 | 387.12 | 72.59 | 54.58 | 42.74 | 31.66 |
| 2306 | 387.59 | 72.65 | 54.63 | 42.82 | 31.71 |
| 2308 | 388.07 | 72.71 | 54.68 | 42.86 | 31.75 |
| 2310 | 388.45 | 72.68 | 54.67 | 42.84 | 31.71 |
| 2312 | 388.94 | 72.72 | 54.7  | 42.88 | 31.73 |
| 2314 | 389.37 | 72.78 | 54.76 | 42.91 | 31.77 |
| 2316 | 389.69 | 72.76 | 54.74 | 42.9  | 31.74 |
| 2318 | 390.07 | 72.78 | 54.76 | 42.92 | 31.74 |
| 2320 | 390.55 | 72.81 | 54.78 | 42.95 | 31.75 |
| 2322 | 391.02 | 72.85 | 54.83 | 42.99 | 31.77 |
| 2324 | 391.46 | 72.87 | 54.84 | 43.01 | 31.78 |
| 2326 | 391.97 | 72.9  | 54.88 | 43.05 | 31.81 |
| 2328 | 392.37 | 72.94 | 54.91 | 43.07 | 31.81 |
| 2330 | 392.74 | 72.94 | 54.92 | 43.07 | 31.8  |
| 2332 | 393.12 | 72.97 | 54.95 | 43.11 | 31.82 |
| 2334 | 393.58 | 73.03 | 55    | 43.16 | 31.85 |
| 2336 | 393.94 | 73.06 | 55.01 | 43.18 | 31.84 |
| 2338 | 394.38 | 73.1  | 55.05 | 43.23 | 31.88 |
| 2340 | 394.82 | 73.12 | 55.06 | 43.23 | 31.87 |
| 2342 | 395.27 | 73.15 | 55.08 | 43.25 | 31.89 |
| 2344 | 395.79 | 73.2  | 55.13 | 43.31 | 31.93 |

|      |        |       |       |       |       |
|------|--------|-------|-------|-------|-------|
| 2346 | 396.2  | 73.25 | 55.17 | 43.34 | 31.92 |
| 2348 | 396.58 | 73.3  | 55.21 | 43.39 | 31.97 |
| 2350 | 396.96 | 73.36 | 55.24 | 43.43 | 31.99 |
| 2352 | 397.39 | 73.39 | 55.27 | 43.45 | 32    |
| 2354 | 397.78 | 73.4  | 55.3  | 43.47 | 32.01 |
| 2356 | 398.17 | 73.39 | 55.28 | 43.44 | 31.97 |
| 2358 | 398.68 | 73.42 | 55.3  | 43.46 | 31.97 |
| 2360 | 399.14 | 73.5  | 55.37 | 43.53 | 32.04 |
| 2362 | 399.53 | 73.52 | 55.37 | 43.53 | 32.01 |
| 2364 | 399.91 | 73.54 | 55.39 | 43.55 | 32.03 |
| 2366 | 400.37 | 73.61 | 55.43 | 43.58 | 32.05 |
| 2368 | 400.73 | 73.64 | 55.48 | 43.61 | 32.07 |
| 2370 | 401.1  | 73.69 | 55.5  | 43.67 | 32.1  |
| 2372 | 401.49 | 73.72 | 55.52 | 43.66 | 32.08 |
| 2374 | 402    | 73.77 | 55.55 | 43.7  | 32.12 |
| 2376 | 402.44 | 73.83 | 55.58 | 43.72 | 32.11 |
| 2378 | 402.88 | 73.89 | 55.62 | 43.77 | 32.12 |
| 2380 | 403.28 | 73.94 | 55.64 | 43.81 | 32.16 |
| 2382 | 403.72 | 74.01 | 55.67 | 43.84 | 32.18 |
| 2384 | 404.02 | 74.04 | 55.66 | 43.82 | 32.14 |
| 2386 | 404.39 | 74.1  | 55.7  | 43.87 | 32.17 |
| 2388 | 404.83 | 74.18 | 55.77 | 43.92 | 32.21 |
| 2390 | 405.28 | 74.24 | 55.8  | 43.95 | 32.23 |
| 2392 | 405.79 | 74.3  | 55.82 | 43.96 | 32.23 |
| 2394 | 406.23 | 74.35 | 55.85 | 43.98 | 32.25 |
| 2396 | 406.65 | 74.42 | 55.88 | 44.03 | 32.27 |
| 2398 | 407.14 | 74.52 | 55.94 | 44.08 | 32.31 |
| 2400 | 407.5  | 74.61 | 55.96 | 44.11 | 32.31 |
| 2402 | 407.85 | 74.68 | 55.99 | 44.14 | 32.35 |
| 2404 | 408.2  | 74.74 | 55.99 | 44.12 | 32.34 |
| 2406 | 408.66 | 74.79 | 56.01 | 44.13 | 32.34 |
| 2408 | 409.13 | 74.93 | 56.08 | 44.21 | 32.4  |
| 2410 | 409.55 | 74.98 | 56.08 | 44.21 | 32.4  |
| 2412 | 410.01 | 75.09 | 56.13 | 44.25 | 32.42 |
| 2414 | 410.42 | 75.2  | 56.17 | 44.29 | 32.46 |
| 2416 | 410.87 | 75.28 | 56.2  | 44.32 | 32.47 |
| 2418 | 411.23 | 75.38 | 56.24 | 44.36 | 32.48 |
| 2420 | 411.59 | 75.49 | 56.27 | 44.39 | 32.5  |
| 2422 | 411.94 | 75.58 | 56.27 | 44.41 | 32.49 |
| 2424 | 412.38 | 75.68 | 56.3  | 44.43 | 32.5  |
| 2426 | 412.94 | 75.81 | 56.34 | 44.46 | 32.53 |
| 2428 | 413.37 | 75.89 | 56.34 | 44.46 | 32.5  |
| 2430 | 413.92 | 76.01 | 56.39 | 44.51 | 32.54 |
| 2432 | 414.34 | 76.15 | 56.43 | 44.53 | 32.57 |

|      |        |       |       |       |       |
|------|--------|-------|-------|-------|-------|
| 2434 | 414.72 | 76.26 | 56.44 | 44.55 | 32.57 |
| 2436 | 415.11 | 76.39 | 56.49 | 44.6  | 32.59 |
| 2438 | 415.48 | 76.5  | 56.53 | 44.63 | 32.62 |
| 2440 | 415.89 | 76.61 | 56.54 | 44.65 | 32.63 |
| 2442 | 416.3  | 76.76 | 56.57 | 44.66 | 32.62 |
| 2444 | 416.74 | 76.86 | 56.58 | 44.68 | 32.63 |
| 2446 | 417.23 | 77.02 | 56.63 | 44.73 | 32.68 |
| 2448 | 417.74 | 77.17 | 56.66 | 44.75 | 32.68 |
| 2450 | 418.13 | 77.28 | 56.66 | 44.76 | 32.67 |
| 2452 | 418.54 | 77.44 | 56.73 | 44.82 | 32.71 |
| 2454 | 418.92 | 77.55 | 56.73 | 44.81 | 32.7  |
| 2456 | 419.29 | 77.7  | 56.74 | 44.82 | 32.7  |
| 2458 | 419.67 | 77.85 | 56.76 | 44.85 | 32.71 |
| 2460 | 420.11 | 78    | 56.79 | 44.87 | 32.72 |
| 2462 | 420.56 | 78.16 | 56.82 | 44.9  | 32.74 |
| 2464 | 421.06 | 78.32 | 56.84 | 44.93 | 32.74 |
| 2466 | 421.47 | 78.5  | 56.86 | 44.94 | 32.76 |
| 2468 | 421.88 | 78.69 | 56.93 | 45    | 32.79 |
| 2470 | 422.24 | 78.85 | 56.93 | 45.01 | 32.8  |
| 2472 | 422.69 | 79.06 | 57    | 45.08 | 32.85 |
| 2474 | 423.07 | 79.26 | 57.04 | 45.11 | 32.86 |
| 2476 | 423.5  | 79.44 | 57.07 | 45.14 | 32.88 |
| 2478 | 423.97 | 79.62 | 57.09 | 45.17 | 32.89 |
| 2480 | 424.5  | 79.81 | 57.11 | 45.19 | 32.9  |
| 2482 | 424.92 | 79.97 | 57.11 | 45.2  | 32.88 |
| 2484 | 425.37 | 80.18 | 57.16 | 45.24 | 32.92 |
| 2486 | 425.77 | 80.38 | 57.2  | 45.27 | 32.94 |
| 2488 | 426.18 | 80.58 | 57.22 | 45.3  | 32.95 |
| 2490 | 426.52 | 80.81 | 57.26 | 45.34 | 33    |
| 2492 | 426.85 | 81.04 | 57.31 | 45.38 | 33.02 |
| 2494 | 427.14 | 81.23 | 57.33 | 45.39 | 33.03 |
| 2496 | 427.44 | 81.4  | 57.32 | 45.39 | 33.01 |
| 2498 | 427.72 | 81.64 | 57.37 | 45.43 | 33.05 |
| 2500 | 427.95 | 81.84 | 57.38 | 45.44 | 33.04 |
| 2502 | 428.18 | 82.05 | 57.4  | 45.47 | 33.05 |
| 2504 | 428.44 | 82.3  | 57.43 | 45.5  | 33.06 |
| 2506 | 428.64 | 82.52 | 57.46 | 45.53 | 33.06 |
| 2508 | 428.82 | 82.74 | 57.49 | 45.55 | 33.08 |
| 2510 | 428.98 | 82.96 | 57.5  | 45.57 | 33.11 |
| 2512 | 429.17 | 83.18 | 57.53 | 45.59 | 33.11 |
| 2514 | 429.32 | 83.44 | 57.56 | 45.62 | 33.13 |
| 2516 | 429.44 | 83.67 | 57.59 | 45.65 | 33.14 |
| 2518 | 429.55 | 83.9  | 57.62 | 45.67 | 33.15 |
| 2520 | 429.65 | 84.12 | 57.62 | 45.67 | 33.15 |

|      |        |       |       |       |       |
|------|--------|-------|-------|-------|-------|
| 2522 | 429.76 | 84.41 | 57.67 | 45.72 | 33.17 |
| 2524 | 429.79 | 84.61 | 57.65 | 45.7  | 33.13 |
| 2526 | 429.85 | 84.85 | 57.67 | 45.72 | 33.16 |
| 2528 | 429.93 | 85.15 | 57.73 | 45.77 | 33.19 |
| 2530 | 429.96 | 85.38 | 57.74 | 45.77 | 33.18 |
| 2532 | 430.01 | 85.65 | 57.79 | 45.82 | 33.21 |
| 2534 | 430.05 | 85.91 | 57.83 | 45.86 | 33.24 |
| 2536 | 430.01 | 86.13 | 57.82 | 45.84 | 33.2  |
| 2538 | 430    | 86.43 | 57.85 | 45.88 | 33.23 |
| 2540 | 429.99 | 86.68 | 57.87 | 45.9  | 33.23 |
| 2542 | 429.98 | 86.97 | 57.92 | 45.94 | 33.25 |
| 2544 | 429.92 | 87.23 | 57.94 | 45.97 | 33.27 |
| 2546 | 429.84 | 87.49 | 57.94 | 45.96 | 33.24 |
| 2548 | 429.81 | 87.8  | 58.02 | 46.04 | 33.31 |
| 2550 | 429.74 | 88.07 | 58.05 | 46.06 | 33.32 |
| 2552 | 429.62 | 88.36 | 58.04 | 46.06 | 33.31 |
| 2554 | 429.51 | 88.62 | 58.05 | 46.08 | 33.31 |
| 2556 | 429.38 | 88.88 | 58.07 | 46.08 | 33.3  |
| 2558 | 429.26 | 89.14 | 58.08 | 46.1  | 33.31 |
| 2560 | 429.1  | 89.41 | 58.11 | 46.12 | 33.32 |
| 2562 | 429.01 | 89.77 | 58.16 | 46.18 | 33.37 |
| 2564 | 428.86 | 90.05 | 58.21 | 46.23 | 33.4  |
| 2566 | 428.67 | 90.31 | 58.21 | 46.23 | 33.38 |
| 2568 | 428.49 | 90.67 | 58.26 | 46.27 | 33.44 |
| 2570 | 428.31 | 90.93 | 58.27 | 46.28 | 33.43 |
| 2572 | 428.12 | 91.24 | 58.31 | 46.34 | 33.46 |
| 2574 | 427.91 | 91.5  | 58.32 | 46.35 | 33.44 |
| 2576 | 427.65 | 91.82 | 58.34 | 46.37 | 33.45 |
| 2578 | 427.44 | 92.12 | 58.37 | 46.41 | 33.49 |
| 2580 | 427.21 | 92.4  | 58.4  | 46.44 | 33.51 |
| 2582 | 426.96 | 92.69 | 58.42 | 46.47 | 33.52 |
| 2584 | 426.68 | 92.97 | 58.43 | 46.5  | 33.53 |
| 2586 | 426.4  | 93.27 | 58.41 | 46.49 | 33.51 |
| 2588 | 426.14 | 93.57 | 58.45 | 46.52 | 33.54 |
| 2590 | 425.88 | 93.85 | 58.48 | 46.56 | 33.57 |
| 2592 | 425.54 | 94.2  | 58.5  | 46.59 | 33.59 |
| 2594 | 425.23 | 94.46 | 58.5  | 46.6  | 33.59 |
| 2596 | 424.92 | 94.74 | 58.52 | 46.62 | 33.6  |
| 2598 | 424.57 | 95.02 | 58.53 | 46.65 | 33.61 |
| 2600 | 424.25 | 95.37 | 58.58 | 46.69 | 33.65 |
| 2602 | 423.91 | 95.62 | 58.56 | 46.69 | 33.64 |
| 2604 | 423.58 | 95.9  | 58.57 | 46.72 | 33.65 |
| 2606 | 423.25 | 96.18 | 58.59 | 46.74 | 33.66 |
| 2608 | 422.85 | 96.46 | 58.6  | 46.76 | 33.67 |

|      |        |        |       |       |       |
|------|--------|--------|-------|-------|-------|
| 2610 | 422.49 | 96.8   | 58.62 | 46.8  | 33.68 |
| 2612 | 422.11 | 97.06  | 58.63 | 46.82 | 33.68 |
| 2614 | 421.75 | 97.34  | 58.63 | 46.82 | 33.68 |
| 2616 | 421.32 | 97.63  | 58.65 | 46.86 | 33.7  |
| 2618 | 420.92 | 97.93  | 58.65 | 46.87 | 33.71 |
| 2620 | 420.54 | 98.21  | 58.66 | 46.9  | 33.73 |
| 2622 | 420.15 | 98.49  | 58.68 | 46.94 | 33.74 |
| 2624 | 419.68 | 98.81  | 58.7  | 46.96 | 33.76 |
| 2626 | 419.28 | 99.07  | 58.71 | 47    | 33.79 |
| 2628 | 418.91 | 99.39  | 58.76 | 47.05 | 33.84 |
| 2630 | 418.47 | 99.62  | 58.74 | 47.04 | 33.81 |
| 2632 | 417.94 | 99.86  | 58.72 | 47.03 | 33.8  |
| 2634 | 417.51 | 100.16 | 58.72 | 47.05 | 33.82 |
| 2636 | 417.07 | 100.41 | 58.74 | 47.07 | 33.83 |
| 2638 | 416.64 | 100.67 | 58.75 | 47.09 | 33.84 |
| 2640 | 416.11 | 100.96 | 58.73 | 47.1  | 33.84 |
| 2642 | 415.66 | 101.2  | 58.73 | 47.13 | 33.85 |
| 2644 | 415.23 | 101.48 | 58.76 | 47.17 | 33.86 |
| 2646 | 414.74 | 101.7  | 58.72 | 47.15 | 33.84 |
| 2648 | 414.22 | 102.02 | 58.75 | 47.18 | 33.86 |
| 2650 | 413.76 | 102.28 | 58.77 | 47.22 | 33.9  |
| 2652 | 413.3  | 102.53 | 58.78 | 47.24 | 33.9  |
| 2654 | 412.83 | 102.78 | 58.78 | 47.26 | 33.91 |
| 2656 | 412.26 | 102.99 | 58.75 | 47.25 | 33.91 |
| 2658 | 411.77 | 103.26 | 58.75 | 47.26 | 33.89 |
| 2660 | 411.29 | 103.51 | 58.77 | 47.3  | 33.9  |
| 2662 | 410.83 | 103.76 | 58.78 | 47.32 | 33.94 |
| 2664 | 410.25 | 104.03 | 58.79 | 47.35 | 33.96 |
| 2666 | 409.73 | 104.24 | 58.76 | 47.33 | 33.93 |
| 2668 | 409.22 | 104.45 | 58.75 | 47.33 | 33.93 |
| 2670 | 408.75 | 104.71 | 58.76 | 47.37 | 33.96 |
| 2672 | 408.16 | 104.95 | 58.75 | 47.36 | 33.95 |
| 2674 | 407.64 | 105.16 | 58.72 | 47.39 | 33.94 |
| 2676 | 407.15 | 105.4  | 58.74 | 47.41 | 33.97 |
| 2678 | 406.64 | 105.63 | 58.75 | 47.43 | 33.98 |
| 2680 | 406.06 | 105.87 | 58.76 | 47.46 | 34.02 |
| 2682 | 405.57 | 106.13 | 58.77 | 47.49 | 34.04 |
| 2684 | 405.07 | 106.36 | 58.78 | 47.51 | 34.04 |
| 2686 | 404.56 | 106.57 | 58.77 | 47.52 | 34.05 |
| 2688 | 404.03 | 106.78 | 58.75 | 47.54 | 34.04 |
| 2690 | 403.44 | 107.04 | 58.78 | 47.57 | 34.08 |
| 2692 | 402.92 | 107.25 | 58.78 | 47.58 | 34.07 |
| 2694 | 402.39 | 107.46 | 58.76 | 47.59 | 34.09 |
| 2696 | 401.78 | 107.64 | 58.75 | 47.6  | 34.09 |

|      |        |        |       |       |       |
|------|--------|--------|-------|-------|-------|
| 2698 | 401.25 | 107.87 | 58.76 | 47.62 | 34.11 |
| 2700 | 400.73 | 108.08 | 58.76 | 47.64 | 34.12 |
| 2702 | 400.2  | 108.28 | 58.76 | 47.65 | 34.13 |
| 2704 | 399.58 | 108.52 | 58.74 | 47.65 | 34.13 |
| 2706 | 399.04 | 108.69 | 58.73 | 47.66 | 34.14 |
| 2708 | 398.48 | 108.86 | 58.71 | 47.65 | 34.15 |
| 2710 | 397.95 | 109.06 | 58.72 | 47.68 | 34.16 |
| 2712 | 397.43 | 109.27 | 58.71 | 47.69 | 34.17 |
| 2714 | 396.82 | 109.48 | 58.7  | 47.7  | 34.17 |
| 2716 | 396.27 | 109.67 | 58.7  | 47.72 | 34.18 |
| 2718 | 395.75 | 109.86 | 58.7  | 47.74 | 34.19 |
| 2720 | 395.11 | 110.05 | 58.69 | 47.74 | 34.21 |
| 2722 | 394.6  | 110.29 | 58.71 | 47.78 | 34.24 |
| 2724 | 394.03 | 110.44 | 58.67 | 47.77 | 34.24 |
| 2726 | 393.52 | 110.64 | 58.68 | 47.8  | 34.25 |
| 2728 | 392.84 | 110.81 | 58.65 | 47.78 | 34.22 |
| 2730 | 392.3  | 110.97 | 58.63 | 47.79 | 34.24 |
| 2732 | 391.78 | 111.15 | 58.63 | 47.8  | 34.24 |
| 2734 | 391.23 | 111.33 | 58.62 | 47.82 | 34.26 |
| 2736 | 390.59 | 111.5  | 58.61 | 47.82 | 34.26 |
| 2738 | 390.05 | 111.69 | 58.61 | 47.83 | 34.27 |
| 2740 | 389.5  | 111.85 | 58.59 | 47.83 | 34.26 |
| 2742 | 388.93 | 111.98 | 58.56 | 47.84 | 34.25 |
| 2744 | 388.31 | 112.19 | 58.56 | 47.85 | 34.26 |
| 2746 | 387.78 | 112.36 | 58.57 | 47.87 | 34.28 |
| 2748 | 387.2  | 112.49 | 58.52 | 47.85 | 34.26 |
| 2750 | 386.65 | 112.63 | 58.51 | 47.86 | 34.26 |
| 2752 | 386.04 | 112.79 | 58.52 | 47.87 | 34.28 |
| 2754 | 385.49 | 112.97 | 58.5  | 47.88 | 34.28 |
| 2756 | 384.94 | 113.12 | 58.49 | 47.88 | 34.29 |
| 2758 | 384.38 | 113.26 | 58.47 | 47.87 | 34.3  |
| 2760 | 383.72 | 113.42 | 58.43 | 47.86 | 34.27 |
| 2762 | 383.18 | 113.57 | 58.43 | 47.87 | 34.29 |
| 2764 | 382.59 | 113.67 | 58.39 | 47.85 | 34.26 |
| 2766 | 382.04 | 113.81 | 58.37 | 47.84 | 34.25 |
| 2768 | 381.44 | 114    | 58.39 | 47.88 | 34.29 |
| 2770 | 380.91 | 114.17 | 58.39 | 47.91 | 34.31 |
| 2772 | 380.37 | 114.31 | 58.38 | 47.92 | 34.31 |
| 2774 | 379.82 | 114.45 | 58.37 | 47.92 | 34.32 |
| 2776 | 379.19 | 114.61 | 58.36 | 47.92 | 34.32 |
| 2778 | 378.64 | 114.73 | 58.33 | 47.92 | 34.31 |
| 2780 | 378.1  | 114.88 | 58.33 | 47.93 | 34.32 |
| 2782 | 377.56 | 115    | 58.31 | 47.94 | 34.32 |
| 2784 | 376.94 | 115.18 | 58.33 | 47.96 | 34.34 |

|      |        |        |       |       |       |
|------|--------|--------|-------|-------|-------|
| 2786 | 376.39 | 115.31 | 58.31 | 47.97 | 34.35 |
| 2788 | 375.83 | 115.42 | 58.28 | 47.96 | 34.36 |
| 2790 | 375.29 | 115.54 | 58.26 | 47.95 | 34.35 |
| 2792 | 374.65 | 115.66 | 58.24 | 47.94 | 34.35 |
| 2794 | 374.13 | 115.83 | 58.26 | 47.97 | 34.37 |
| 2796 | 373.59 | 115.96 | 58.25 | 47.98 | 34.39 |
| 2798 | 373.03 | 116.06 | 58.21 | 47.95 | 34.35 |
| 2800 | 372.38 | 116.19 | 58.2  | 47.95 | 34.36 |
| 2802 | 371.85 | 116.32 | 58.19 | 47.97 | 34.37 |
| 2804 | 371.33 | 116.46 | 58.19 | 47.99 | 34.4  |
| 2806 | 370.78 | 116.57 | 58.16 | 47.97 | 34.38 |
| 2808 | 370.11 | 116.64 | 58.12 | 47.95 | 34.36 |
| 2810 | 369.62 | 116.81 | 58.14 | 47.98 | 34.39 |
| 2812 | 369.09 | 116.93 | 58.13 | 48    | 34.4  |
| 2814 | 368.53 | 117.02 | 58.09 | 47.98 | 34.38 |
| 2816 | 367.87 | 117.11 | 58.08 | 47.97 | 34.38 |
| 2818 | 367.32 | 117.23 | 58.04 | 47.96 | 34.36 |
| 2820 | 366.8  | 117.34 | 58.02 | 47.95 | 34.36 |
| 2822 | 366.27 | 117.45 | 58.02 | 47.96 | 34.39 |
| 2824 | 365.68 | 117.59 | 58.03 | 47.99 | 34.41 |
| 2826 | 365.11 | 117.67 | 57.99 | 47.97 | 34.38 |
| 2828 | 364.58 | 117.78 | 57.98 | 47.97 | 34.39 |
| 2830 | 364.06 | 117.9  | 57.98 | 47.99 | 34.41 |
| 2832 | 363.4  | 117.97 | 57.92 | 47.94 | 34.36 |
| 2834 | 362.86 | 118.07 | 57.9  | 47.93 | 34.36 |
| 2836 | 362.37 | 118.2  | 57.93 | 47.97 | 34.4  |
| 2838 | 361.85 | 118.31 | 57.92 | 47.97 | 34.41 |
| 2840 | 361.21 | 118.4  | 57.89 | 47.95 | 34.39 |
| 2842 | 360.69 | 118.49 | 57.87 | 47.96 | 34.4  |
| 2844 | 360.16 | 118.58 | 57.85 | 47.95 | 34.41 |
| 2846 | 359.62 | 118.65 | 57.83 | 47.94 | 34.4  |
| 2848 | 359.02 | 118.76 | 57.82 | 47.95 | 34.41 |
| 2850 | 358.48 | 118.86 | 57.79 | 47.93 | 34.4  |
| 2852 | 357.96 | 118.95 | 57.78 | 47.93 | 34.4  |
| 2854 | 357.42 | 119.03 | 57.76 | 47.92 | 34.4  |
| 2856 | 356.79 | 119.09 | 57.7  | 47.89 | 34.36 |
| 2858 | 356.29 | 119.21 | 57.72 | 47.91 | 34.39 |
| 2860 | 355.77 | 119.29 | 57.7  | 47.9  | 34.39 |
| 2862 | 355.14 | 119.36 | 57.66 | 47.88 | 34.36 |
| 2864 | 354.6  | 119.43 | 57.62 | 47.86 | 34.34 |
| 2866 | 354.13 | 119.55 | 57.66 | 47.9  | 34.39 |
| 2868 | 353.62 | 119.65 | 57.65 | 47.91 | 34.4  |
| 2870 | 353.13 | 119.75 | 57.65 | 47.93 | 34.42 |
| 2872 | 352.49 | 119.81 | 57.6  | 47.88 | 34.38 |



|      |        |        |       |       |       |
|------|--------|--------|-------|-------|-------|
| 2874 | 351.98 | 119.89 | 57.59 | 47.89 | 34.39 |
| 2876 | 351.46 | 119.96 | 57.58 | 47.89 | 34.39 |
| 2878 | 350.95 | 120.04 | 57.56 | 47.88 | 34.39 |
| 2880 | 350.33 | 120.08 | 57.52 | 47.85 | 34.38 |
| 2882 | 349.82 | 120.18 | 57.5  | 47.86 | 34.38 |
| 2884 | 349.31 | 120.26 | 57.49 | 47.85 | 34.38 |
| 2886 | 348.78 | 120.31 | 57.46 | 47.84 | 34.37 |
| 2888 | 348.2  | 120.39 | 57.46 | 47.84 | 34.38 |
| 2890 | 347.69 | 120.47 | 57.43 | 47.83 | 34.38 |
| 2892 | 347.16 | 120.51 | 57.39 | 47.8  | 34.35 |
| 2894 | 346.66 | 120.59 | 57.38 | 47.81 | 34.35 |
| 2896 | 346.05 | 120.65 | 57.35 | 47.8  | 34.35 |
| 2898 | 345.52 | 120.71 | 57.32 | 47.77 | 34.31 |
| 2900 | 345.03 | 120.78 | 57.31 | 47.77 | 34.32 |
| 2902 | 344.5  | 120.82 | 57.27 | 47.75 | 34.31 |
| 2904 | 343.93 | 120.89 | 57.25 | 47.75 | 34.31 |
| 2906 | 343.43 | 120.99 | 57.27 | 47.77 | 34.33 |
| 2908 | 342.91 | 121.01 | 57.21 | 47.73 | 34.3  |
| 2910 | 342.45 | 121.12 | 57.23 | 47.75 | 34.33 |
| 2912 | 341.85 | 121.17 | 57.21 | 47.73 | 34.31 |
| 2914 | 341.36 | 121.23 | 57.19 | 47.73 | 34.32 |
| 2916 | 340.86 | 121.3  | 57.18 | 47.73 | 34.32 |
| 2918 | 340.37 | 121.35 | 57.15 | 47.72 | 34.31 |
| 2920 | 339.86 | 121.4  | 57.13 | 47.71 | 34.31 |
| 2922 | 339.27 | 121.47 | 57.11 | 47.7  | 34.31 |
| 2924 | 338.78 | 121.52 | 57.09 | 47.7  | 34.3  |
| 2926 | 338.29 | 121.58 | 57.08 | 47.7  | 34.3  |
| 2928 | 337.69 | 121.62 | 57.05 | 47.67 | 34.27 |
| 2930 | 337.23 | 121.71 | 57.06 | 47.68 | 34.29 |
| 2932 | 336.74 | 121.75 | 57.02 | 47.66 | 34.28 |
| 2934 | 336.25 | 121.8  | 57.01 | 47.67 | 34.29 |
| 2936 | 335.67 | 121.85 | 56.98 | 47.65 | 34.28 |
| 2938 | 335.18 | 121.89 | 56.95 | 47.63 | 34.27 |
| 2940 | 334.68 | 121.94 | 56.93 | 47.62 | 34.26 |
| 2942 | 334.17 | 121.98 | 56.91 | 47.61 | 34.26 |
| 2944 | 333.57 | 121.99 | 56.85 | 47.56 | 34.21 |
| 2946 | 333.09 | 122.03 | 56.83 | 47.54 | 34.19 |
| 2948 | 332.62 | 122.08 | 56.81 | 47.54 | 34.2  |
| 2950 | 332.16 | 122.15 | 56.82 | 47.56 | 34.22 |
| 2952 | 331.61 | 122.21 | 56.81 | 47.55 | 34.24 |
| 2954 | 331.12 | 122.25 | 56.78 | 47.56 | 34.24 |
| 2956 | 330.65 | 122.31 | 56.78 | 47.57 | 34.25 |
| 2958 | 330.18 | 122.36 | 56.77 | 47.56 | 34.25 |
| 2960 | 329.64 | 122.44 | 56.79 | 47.58 | 34.27 |

|      |        |        |       |       |       |
|------|--------|--------|-------|-------|-------|
| 2962 | 329.15 | 122.46 | 56.75 | 47.55 | 34.26 |
| 2964 | 328.68 | 122.5  | 56.73 | 47.55 | 34.25 |
| 2966 | 328.2  | 122.54 | 56.7  | 47.53 | 34.22 |
| 2968 | 327.64 | 122.56 | 56.67 | 47.51 | 34.21 |
| 2970 | 327.18 | 122.62 | 56.66 | 47.52 | 34.23 |
| 2972 | 326.68 | 122.64 | 56.63 | 47.48 | 34.21 |
| 2974 | 326.19 | 122.68 | 56.61 | 47.48 | 34.21 |
| 2976 | 325.63 | 122.7  | 56.58 | 47.45 | 34.2  |
| 2978 | 325.17 | 122.75 | 56.58 | 47.45 | 34.21 |
| 2980 | 324.72 | 122.79 | 56.56 | 47.45 | 34.21 |
| 2982 | 324.22 | 122.8  | 56.51 | 47.41 | 34.18 |
| 2984 | 323.64 | 122.82 | 56.48 | 47.39 | 34.17 |
| 2986 | 323.16 | 122.85 | 56.45 | 47.38 | 34.18 |
| 2988 | 322.68 | 122.86 | 56.41 | 47.34 | 34.14 |
| 2990 | 322.26 | 122.93 | 56.43 | 47.37 | 34.18 |
| 2992 | 321.69 | 122.93 | 56.38 | 47.33 | 34.14 |
| 2994 | 321.26 | 123    | 56.4  | 47.35 | 34.18 |
| 2996 | 320.8  | 123.03 | 56.38 | 47.35 | 34.18 |
| 2998 | 320.34 | 123.06 | 56.36 | 47.34 | 34.17 |
| 3000 | 319.8  | 123.09 | 56.35 | 47.33 | 34.16 |
| 3002 | 319.32 | 123.1  | 56.31 | 47.31 | 34.15 |
| 3004 | 318.87 | 123.14 | 56.3  | 47.31 | 34.15 |
| 3006 | 318.43 | 123.18 | 56.29 | 47.31 | 34.15 |
| 3008 | 317.89 | 123.2  | 56.26 | 47.29 | 34.15 |
| 3010 | 317.42 | 123.22 | 56.23 | 47.28 | 34.13 |
| 3012 | 316.96 | 123.24 | 56.21 | 47.26 | 34.14 |
| 3014 | 316.5  | 123.26 | 56.19 | 47.24 | 34.13 |
| 3016 | 315.96 | 123.28 | 56.17 | 47.23 | 34.12 |
| 3018 | 315.51 | 123.3  | 56.14 | 47.21 | 34.11 |
| 3020 | 315.08 | 123.33 | 56.14 | 47.21 | 34.12 |
| 3022 | 314.63 | 123.36 | 56.12 | 47.21 | 34.11 |
| 3024 | 314.17 | 123.38 | 56.11 | 47.2  | 34.12 |
| 3026 | 313.61 | 123.38 | 56.06 | 47.15 | 34.09 |
| 3028 | 313.16 | 123.39 | 56.03 | 47.14 | 34.09 |
| 3030 | 312.76 | 123.45 | 56.05 | 47.18 | 34.13 |
| 3032 | 312.25 | 123.48 | 56.05 | 47.18 | 34.12 |
| 3034 | 311.77 | 123.47 | 56    | 47.16 | 34.1  |
| 3036 | 311.32 | 123.49 | 55.98 | 47.14 | 34.1  |
| 3038 | 310.88 | 123.51 | 55.95 | 47.11 | 34.06 |
| 3040 | 310.37 | 123.54 | 55.95 | 47.12 | 34.09 |
| 3042 | 309.92 | 123.56 | 55.93 | 47.1  | 34.09 |
| 3044 | 309.48 | 123.56 | 55.91 | 47.09 | 34.08 |
| 3046 | 309.04 | 123.58 | 55.89 | 47.08 | 34.07 |
| 3048 | 308.53 | 123.59 | 55.86 | 47.07 | 34.07 |

|      |        |        |       |       |       |
|------|--------|--------|-------|-------|-------|
| 3050 | 308.1  | 123.6  | 55.84 | 47.05 | 34.06 |
| 3052 | 307.67 | 123.63 | 55.84 | 47.05 | 34.07 |
| 3054 | 307.21 | 123.63 | 55.81 | 47.03 | 34.07 |
| 3056 | 306.75 | 123.62 | 55.76 | 46.99 | 34.03 |
| 3058 | 306.24 | 123.63 | 55.73 | 46.97 | 34.03 |
| 3060 | 305.82 | 123.65 | 55.74 | 46.99 | 34.05 |
| 3062 | 305.39 | 123.67 | 55.71 | 46.96 | 34.03 |
| 3064 | 304.87 | 123.66 | 55.69 | 46.95 | 34.02 |
| 3066 | 304.44 | 123.68 | 55.67 | 46.95 | 34.04 |
| 3068 | 304    | 123.66 | 55.62 | 46.9  | 34    |
| 3070 | 303.59 | 123.71 | 55.64 | 46.91 | 34.01 |
| 3072 | 303.08 | 123.71 | 55.61 | 46.91 | 34.01 |
| 3074 | 302.65 | 123.7  | 55.57 | 46.88 | 33.99 |
| 3076 | 302.21 | 123.69 | 55.54 | 46.85 | 33.96 |
| 3078 | 301.78 | 123.7  | 55.53 | 46.85 | 33.98 |
| 3080 | 301.27 | 123.7  | 55.49 | 46.84 | 33.97 |
| 3082 | 300.82 | 123.7  | 55.46 | 46.8  | 33.94 |
| 3084 | 300.4  | 123.69 | 55.44 | 46.79 | 33.92 |
| 3086 | 299.96 | 123.7  | 55.42 | 46.77 | 33.92 |
| 3088 | 299.52 | 123.75 | 55.44 | 46.79 | 33.95 |
| 3090 | 299.1  | 123.73 | 55.4  | 46.77 | 33.94 |
| 3092 | 298.66 | 123.73 | 55.38 | 46.77 | 33.94 |
| 3094 | 298.24 | 123.75 | 55.37 | 46.76 | 33.94 |
| 3096 | 297.76 | 123.76 | 55.37 | 46.75 | 33.94 |
| 3098 | 297.33 | 123.73 | 55.32 | 46.72 | 33.91 |
| 3100 | 296.93 | 123.75 | 55.3  | 46.71 | 33.92 |
| 3102 | 296.51 | 123.75 | 55.28 | 46.7  | 33.91 |
| 3104 | 296.02 | 123.75 | 55.27 | 46.68 | 33.9  |
| 3106 | 295.6  | 123.74 | 55.24 | 46.66 | 33.89 |
| 3108 | 295.2  | 123.74 | 55.22 | 46.65 | 33.89 |
| 3110 | 294.76 | 123.71 | 55.17 | 46.61 | 33.85 |
| 3112 | 294.35 | 123.71 | 55.16 | 46.6  | 33.85 |
| 3114 | 293.83 | 123.7  | 55.12 | 46.57 | 33.84 |
| 3116 | 293.4  | 123.69 | 55.09 | 46.55 | 33.83 |
| 3118 | 293.02 | 123.7  | 55.09 | 46.55 | 33.82 |
| 3120 | 292.51 | 123.66 | 55.04 | 46.5  | 33.79 |
| 3122 | 292.13 | 123.68 | 55.03 | 46.5  | 33.82 |
| 3124 | 291.74 | 123.68 | 55.03 | 46.51 | 33.81 |
| 3126 | 291.33 | 123.68 | 55    | 46.49 | 33.8  |
| 3128 | 290.84 | 123.67 | 54.98 | 46.47 | 33.8  |
| 3130 | 290.43 | 123.66 | 54.95 | 46.45 | 33.79 |
| 3132 | 290.02 | 123.65 | 54.93 | 46.44 | 33.78 |
| 3134 | 289.59 | 123.61 | 54.88 | 46.39 | 33.74 |
| 3136 | 289.15 | 123.57 | 54.83 | 46.34 | 33.7  |

|      |        |        |       |       |       |
|------|--------|--------|-------|-------|-------|
| 3138 | 288.71 | 123.59 | 54.82 | 46.34 | 33.7  |
| 3140 | 288.31 | 123.59 | 54.82 | 46.34 | 33.71 |
| 3142 | 287.94 | 123.59 | 54.8  | 46.34 | 33.71 |
| 3144 | 287.45 | 123.58 | 54.78 | 46.33 | 33.71 |
| 3146 | 287.04 | 123.56 | 54.74 | 46.31 | 33.69 |
| 3148 | 286.66 | 123.56 | 54.74 | 46.29 | 33.68 |
| 3150 | 286.25 | 123.54 | 54.72 | 46.29 | 33.68 |
| 3152 | 285.79 | 123.53 | 54.7  | 46.27 | 33.68 |
| 3154 | 285.4  | 123.52 | 54.67 | 46.26 | 33.66 |
| 3156 | 284.99 | 123.48 | 54.62 | 46.21 | 33.63 |
| 3158 | 284.59 | 123.47 | 54.61 | 46.19 | 33.62 |
| 3160 | 284.09 | 123.42 | 54.55 | 46.14 | 33.59 |
| 3162 | 283.69 | 123.4  | 54.53 | 46.11 | 33.59 |
| 3164 | 283.32 | 123.41 | 54.52 | 46.13 | 33.6  |
| 3166 | 282.94 | 123.4  | 54.51 | 46.11 | 33.58 |
| 3168 | 282.5  | 123.41 | 54.51 | 46.12 | 33.61 |
| 3170 | 282.08 | 123.36 | 54.46 | 46.08 | 33.58 |
| 3172 | 281.69 | 123.35 | 54.44 | 46.07 | 33.57 |
| 3174 | 281.32 | 123.33 | 54.42 | 46.05 | 33.54 |
| 3176 | 280.85 | 123.29 | 54.38 | 46    | 33.51 |
| 3178 | 280.46 | 123.28 | 54.36 | 46    | 33.51 |
| 3180 | 280.11 | 123.3  | 54.37 | 46.01 | 33.54 |
| 3182 | 279.74 | 123.3  | 54.36 | 46.02 | 33.55 |
| 3184 | 279.25 | 123.25 | 54.31 | 45.96 | 33.51 |
| 3186 | 278.89 | 123.24 | 54.3  | 45.96 | 33.52 |
| 3188 | 278.52 | 123.24 | 54.3  | 45.96 | 33.53 |
| 3190 | 278.1  | 123.19 | 54.24 | 45.92 | 33.48 |
| 3192 | 277.64 | 123.15 | 54.21 | 45.9  | 33.47 |
| 3194 | 277.3  | 123.17 | 54.22 | 45.9  | 33.49 |
| 3196 | 276.91 | 123.15 | 54.19 | 45.89 | 33.49 |
| 3198 | 276.52 | 123.11 | 54.15 | 45.83 | 33.44 |
| 3200 | 276.12 | 123.08 | 54.12 | 45.82 | 33.42 |
| 3202 | 275.7  | 123.06 | 54.1  | 45.8  | 33.42 |
| 3204 | 275.33 | 123.04 | 54.09 | 45.79 | 33.42 |
| 3206 | 274.95 | 123.03 | 54.07 | 45.78 | 33.41 |
| 3208 | 274.54 | 123.04 | 54.08 | 45.8  | 33.44 |
| 3210 | 274.15 | 122.99 | 54.03 | 45.77 | 33.43 |
| 3212 | 273.78 | 122.97 | 54.02 | 45.75 | 33.4  |
| 3214 | 273.4  | 122.95 | 53.99 | 45.73 | 33.4  |
| 3216 | 272.96 | 122.92 | 53.96 | 45.71 | 33.38 |
| 3218 | 272.6  | 122.9  | 53.94 | 45.69 | 33.36 |
| 3220 | 272.23 | 122.89 | 53.94 | 45.7  | 33.38 |
| 3222 | 271.86 | 122.87 | 53.92 | 45.69 | 33.38 |
| 3224 | 271.42 | 122.82 | 53.88 | 45.65 | 33.36 |

|      |        |        |       |       |       |
|------|--------|--------|-------|-------|-------|
| 3226 | 271.03 | 122.79 | 53.85 | 45.61 | 33.35 |
| 3228 | 270.65 | 122.75 | 53.81 | 45.58 | 33.31 |
| 3230 | 270.3  | 122.75 | 53.82 | 45.59 | 33.33 |
| 3232 | 269.88 | 122.74 | 53.81 | 45.59 | 33.34 |
| 3234 | 269.51 | 122.71 | 53.79 | 45.57 | 33.33 |
| 3236 | 269.15 | 122.69 | 53.76 | 45.56 | 33.32 |
| 3238 | 268.79 | 122.66 | 53.74 | 45.54 | 33.31 |
| 3240 | 268.42 | 122.63 | 53.71 | 45.53 | 33.3  |
| 3242 | 268    | 122.61 | 53.69 | 45.51 | 33.29 |
| 3244 | 267.61 | 122.54 | 53.63 | 45.46 | 33.26 |
| 3246 | 267.24 | 122.51 | 53.61 | 45.43 | 33.24 |
| 3248 | 266.84 | 122.5  | 53.61 | 45.43 | 33.25 |
| 3250 | 266.49 | 122.49 | 53.61 | 45.44 | 33.27 |
| 3252 | 266.1  | 122.44 | 53.56 | 45.4  | 33.22 |
| 3254 | 265.72 | 122.37 | 53.51 | 45.35 | 33.18 |
| 3256 | 265.32 | 122.36 | 53.51 | 45.35 | 33.2  |
| 3258 | 264.98 | 122.35 | 53.5  | 45.35 | 33.19 |
| 3260 | 264.63 | 122.33 | 53.48 | 45.33 | 33.19 |
| 3262 | 264.25 | 122.27 | 53.43 | 45.29 | 33.15 |
| 3264 | 263.89 | 122.24 | 53.41 | 45.28 | 33.15 |
| 3266 | 263.51 | 122.23 | 53.41 | 45.29 | 33.17 |
| 3268 | 263.14 | 122.2  | 53.39 | 45.28 | 33.16 |
| 3270 | 262.8  | 122.18 | 53.38 | 45.26 | 33.16 |
| 3272 | 262.38 | 122.15 | 53.33 | 45.23 | 33.13 |
| 3274 | 262    | 122.08 | 53.29 | 45.2  | 33.1  |
| 3276 | 261.66 | 122.07 | 53.29 | 45.21 | 33.1  |
| 3278 | 261.32 | 122.03 | 53.26 | 45.18 | 33.08 |
| 3280 | 260.92 | 121.99 | 53.23 | 45.16 | 33.06 |
| 3282 | 260.6  | 121.99 | 53.24 | 45.18 | 33.09 |
| 3284 | 260.24 | 121.96 | 53.23 | 45.17 | 33.09 |
| 3286 | 259.87 | 121.9  | 53.18 | 45.12 | 33.05 |
| 3288 | 259.48 | 121.88 | 53.17 | 45.12 | 33.04 |
| 3290 | 259.12 | 121.82 | 53.14 | 45.08 | 33.01 |
| 3292 | 258.79 | 121.82 | 53.13 | 45.08 | 33.03 |
| 3294 | 258.41 | 121.77 | 53.1  | 45.05 | 33    |
| 3296 | 258.02 | 121.73 | 53.08 | 45.04 | 33    |
| 3298 | 257.66 | 121.7  | 53.04 | 45.02 | 32.99 |
| 3300 | 257.34 | 121.68 | 53.04 | 45.01 | 32.99 |
| 3302 | 256.97 | 121.61 | 52.99 | 44.96 | 32.94 |
| 3304 | 256.64 | 121.58 | 52.98 | 44.95 | 32.94 |
| 3306 | 256.27 | 121.57 | 52.98 | 44.96 | 32.97 |
| 3308 | 255.92 | 121.53 | 52.93 | 44.92 | 32.93 |
| 3310 | 255.54 | 121.46 | 52.89 | 44.89 | 32.89 |
| 3312 | 255.18 | 121.45 | 52.9  | 44.9  | 32.93 |

|      |        |        |       |       |       |
|------|--------|--------|-------|-------|-------|
| 3314 | 254.81 | 121.38 | 52.84 | 44.85 | 32.9  |
| 3316 | 254.46 | 121.34 | 52.82 | 44.82 | 32.86 |
| 3318 | 254.13 | 121.31 | 52.81 | 44.82 | 32.88 |
| 3320 | 253.74 | 121.28 | 52.8  | 44.81 | 32.89 |
| 3322 | 253.39 | 121.23 | 52.76 | 44.78 | 32.87 |
| 3324 | 253.03 | 121.18 | 52.71 | 44.74 | 32.82 |
| 3326 | 252.69 | 121.15 | 52.71 | 44.74 | 32.83 |
| 3328 | 252.35 | 121.14 | 52.71 | 44.74 | 32.84 |
| 3330 | 252.06 | 121.11 | 52.7  | 44.74 | 32.84 |
| 3332 | 251.66 | 121.05 | 52.65 | 44.7  | 32.81 |
| 3334 | 251.35 | 121.02 | 52.64 | 44.7  | 32.81 |
| 3336 | 251.03 | 121    | 52.64 | 44.7  | 32.82 |
| 3338 | 250.61 | 120.92 | 52.59 | 44.66 | 32.8  |
| 3340 | 250.32 | 120.91 | 52.59 | 44.66 | 32.8  |
| 3342 | 249.96 | 120.85 | 52.55 | 44.62 | 32.77 |
| 3344 | 249.64 | 120.83 | 52.54 | 44.61 | 32.76 |
| 3346 | 249.26 | 120.79 | 52.53 | 44.61 | 32.78 |
| 3348 | 248.92 | 120.74 | 52.5  | 44.58 | 32.74 |
| 3350 | 248.59 | 120.72 | 52.49 | 44.58 | 32.75 |
| 3352 | 248.22 | 120.68 | 52.47 | 44.56 | 32.75 |
| 3354 | 247.9  | 120.63 | 52.45 | 44.54 | 32.74 |
| 3356 | 247.57 | 120.6  | 52.43 | 44.53 | 32.73 |
| 3358 | 247.25 | 120.56 | 52.4  | 44.51 | 32.71 |
| 3360 | 246.93 | 120.51 | 52.38 | 44.5  | 32.71 |
| 3362 | 246.55 | 120.49 | 52.37 | 44.48 | 32.7  |
| 3364 | 246.27 | 120.49 | 52.4  | 44.51 | 32.75 |
| 3366 | 245.92 | 120.41 | 52.34 | 44.47 | 32.7  |
| 3368 | 245.58 | 120.36 | 52.32 | 44.45 | 32.68 |
| 3370 | 245.24 | 120.35 | 52.32 | 44.46 | 32.71 |
| 3372 | 244.91 | 120.3  | 52.3  | 44.44 | 32.7  |
| 3374 | 244.59 | 120.27 | 52.27 | 44.41 | 32.69 |
| 3376 | 244.23 | 120.24 | 52.27 | 44.42 | 32.7  |
| 3378 | 243.86 | 120.13 | 52.19 | 44.35 | 32.63 |
| 3380 | 243.54 | 120.1  | 52.17 | 44.34 | 32.64 |
| 3382 | 243.22 | 120.05 | 52.17 | 44.32 | 32.64 |
| 3384 | 242.89 | 120    | 52.12 | 44.29 | 32.61 |
| 3386 | 242.52 | 119.95 | 52.1  | 44.27 | 32.59 |
| 3388 | 242.24 | 119.93 | 52.1  | 44.28 | 32.61 |
| 3390 | 241.9  | 119.87 | 52.05 | 44.24 | 32.58 |
| 3392 | 241.54 | 119.84 | 52.05 | 44.23 | 32.58 |
| 3394 | 241.23 | 119.79 | 52.04 | 44.23 | 32.59 |
| 3396 | 240.91 | 119.75 | 52.01 | 44.22 | 32.57 |
| 3398 | 240.62 | 119.73 | 52.02 | 44.22 | 32.59 |
| 3400 | 240.25 | 119.67 | 51.99 | 44.18 | 32.57 |

|      |        |        |       |       |       |
|------|--------|--------|-------|-------|-------|
| 3402 | 239.93 | 119.62 | 51.96 | 44.15 | 32.56 |
| 3404 | 239.58 | 119.54 | 51.91 | 44.11 | 32.52 |
| 3406 | 239.24 | 119.48 | 51.87 | 44.07 | 32.48 |
| 3408 | 238.91 | 119.41 | 51.82 | 44.03 | 32.45 |
| 3410 | 238.57 | 119.38 | 51.83 | 44.05 | 32.47 |
| 3412 | 238.25 | 119.31 | 51.79 | 44.01 | 32.44 |
| 3414 | 237.94 | 119.28 | 51.77 | 43.99 | 32.43 |
| 3416 | 237.59 | 119.24 | 51.75 | 43.97 | 32.42 |
| 3418 | 237.3  | 119.21 | 51.76 | 43.99 | 32.44 |
| 3420 | 236.98 | 119.15 | 51.72 | 43.96 | 32.41 |
| 3422 | 236.69 | 119.11 | 51.71 | 43.95 | 32.4  |
| 3424 | 236.37 | 119.09 | 51.72 | 43.97 | 32.43 |
| 3426 | 236.05 | 119.05 | 51.7  | 43.94 | 32.42 |
| 3428 | 235.72 | 118.96 | 51.65 | 43.9  | 32.39 |
| 3430 | 235.42 | 118.93 | 51.64 | 43.89 | 32.39 |
| 3432 | 235.06 | 118.87 | 51.61 | 43.88 | 32.38 |
| 3434 | 234.73 | 118.81 | 51.57 | 43.84 | 32.36 |
| 3436 | 234.44 | 118.77 | 51.57 | 43.83 | 32.36 |
| 3438 | 234.14 | 118.72 | 51.54 | 43.81 | 32.35 |
| 3440 | 233.76 | 118.64 | 51.5  | 43.78 | 32.32 |
| 3442 | 233.49 | 118.62 | 51.5  | 43.78 | 32.33 |
| 3444 | 233.16 | 118.57 | 51.47 | 43.74 | 32.29 |
| 3446 | 232.87 | 118.5  | 51.43 | 43.71 | 32.28 |
| 3448 | 232.52 | 118.47 | 51.43 | 43.71 | 32.29 |
| 3450 | 232.19 | 118.37 | 51.36 | 43.65 | 32.24 |
| 3452 | 231.95 | 118.37 | 51.39 | 43.69 | 32.28 |
| 3454 | 231.66 | 118.33 | 51.39 | 43.69 | 32.28 |
| 3456 | 231.3  | 118.27 | 51.35 | 43.66 | 32.25 |
| 3458 | 231.01 | 118.23 | 51.34 | 43.66 | 32.26 |
| 3460 | 230.71 | 118.18 | 51.32 | 43.64 | 32.25 |
| 3462 | 230.42 | 118.13 | 51.3  | 43.62 | 32.23 |
| 3464 | 230.11 | 118.09 | 51.28 | 43.6  | 32.23 |
| 3466 | 229.77 | 118.03 | 51.25 | 43.58 | 32.22 |
| 3468 | 229.48 | 117.98 | 51.23 | 43.56 | 32.2  |
| 3470 | 229.18 | 117.92 | 51.21 | 43.55 | 32.2  |
| 3472 | 228.88 | 117.92 | 51.24 | 43.59 | 32.24 |
| 3474 | 228.57 | 117.84 | 51.19 | 43.53 | 32.21 |
| 3476 | 228.29 | 117.82 | 51.2  | 43.54 | 32.23 |
| 3478 | 228    | 117.76 | 51.18 | 43.52 | 32.22 |
| 3480 | 227.61 | 117.66 | 51.11 | 43.46 | 32.16 |
| 3482 | 227.35 | 117.65 | 51.12 | 43.47 | 32.18 |
| 3484 | 227.05 | 117.59 | 51.09 | 43.44 | 32.16 |
| 3486 | 226.74 | 117.52 | 51.06 | 43.41 | 32.13 |
| 3488 | 226.48 | 117.5  | 51.07 | 43.42 | 32.16 |

|      |        |        |       |       |       |
|------|--------|--------|-------|-------|-------|
| 3490 | 226.13 | 117.42 | 51.02 | 43.39 | 32.13 |
| 3492 | 225.83 | 117.34 | 50.98 | 43.35 | 32.09 |
| 3494 | 225.57 | 117.34 | 51.01 | 43.38 | 32.12 |
| 3496 | 225.23 | 117.28 | 50.99 | 43.36 | 32.11 |
| 3498 | 224.96 | 117.24 | 50.97 | 43.36 | 32.11 |
| 3500 | 224.66 | 117.18 | 50.95 | 43.32 | 32.08 |
| 3502 | 224.37 | 117.13 | 50.92 | 43.3  | 32.08 |
| 3504 | 224.09 | 117.07 | 50.9  | 43.29 | 32.07 |
| 3506 | 223.76 | 117.03 | 50.88 | 43.28 | 32.07 |
| 3508 | 223.47 | 116.97 | 50.86 | 43.27 | 32.06 |
| 3510 | 223.18 | 116.91 | 50.83 | 43.24 | 32.04 |
| 3512 | 222.91 | 116.86 | 50.83 | 43.23 | 32.04 |
| 3514 | 222.58 | 116.8  | 50.8  | 43.22 | 32.03 |
| 3516 | 222.28 | 116.74 | 50.76 | 43.19 | 32.02 |
| 3518 | 222.01 | 116.69 | 50.75 | 43.17 | 32    |
| 3520 | 221.7  | 116.65 | 50.73 | 43.16 | 32    |
| 3522 | 221.42 | 116.61 | 50.73 | 43.15 | 32    |
| 3524 | 221.13 | 116.56 | 50.72 | 43.15 | 32    |
| 3526 | 220.83 | 116.48 | 50.67 | 43.1  | 31.97 |
| 3528 | 220.55 | 116.42 | 50.65 | 43.08 | 31.96 |
| 3530 | 220.23 | 116.37 | 50.64 | 43.09 | 31.97 |
| 3532 | 219.99 | 116.37 | 50.66 | 43.11 | 31.98 |
| 3534 | 219.67 | 116.27 | 50.59 | 43.04 | 31.93 |
| 3536 | 219.35 | 116.23 | 50.59 | 43.05 | 31.94 |
| 3538 | 219.09 | 116.19 | 50.59 | 43.05 | 31.96 |
| 3540 | 218.79 | 116.13 | 50.56 | 43.02 | 31.94 |
| 3542 | 218.52 | 116.06 | 50.52 | 42.98 | 31.91 |
| 3544 | 218.16 | 115.97 | 50.49 | 42.96 | 31.89 |
| 3546 | 217.93 | 115.96 | 50.5  | 42.97 | 31.92 |
| 3548 | 217.63 | 115.88 | 50.46 | 42.93 | 31.88 |
| 3550 | 217.36 | 115.83 | 50.43 | 42.91 | 31.87 |
| 3552 | 217.12 | 115.8  | 50.43 | 42.92 | 31.89 |
| 3554 | 216.8  | 115.73 | 50.42 | 42.9  | 31.86 |
| 3556 | 216.53 | 115.68 | 50.39 | 42.89 | 31.86 |
| 3558 | 216.26 | 115.63 | 50.38 | 42.88 | 31.86 |
| 3560 | 215.91 | 115.54 | 50.32 | 42.83 | 31.82 |
| 3562 | 215.66 | 115.5  | 50.33 | 42.83 | 31.83 |
| 3564 | 215.35 | 115.41 | 50.28 | 42.78 | 31.8  |
| 3566 | 215.06 | 115.35 | 50.24 | 42.75 | 31.76 |
| 3568 | 214.77 | 115.3  | 50.24 | 42.76 | 31.78 |
| 3570 | 214.51 | 115.27 | 50.24 | 42.75 | 31.8  |
| 3572 | 214.23 | 115.19 | 50.19 | 42.71 | 31.75 |
| 3574 | 213.99 | 115.17 | 50.21 | 42.73 | 31.76 |
| 3576 | 213.64 | 115.1  | 50.16 | 42.68 | 31.73 |



|      |        |        |       |       |       |
|------|--------|--------|-------|-------|-------|
| 3578 | 213.39 | 115.02 | 50.14 | 42.67 | 31.74 |
| 3580 | 213.11 | 114.96 | 50.12 | 42.65 | 31.73 |
| 3582 | 212.81 | 114.89 | 50.08 | 42.61 | 31.69 |
| 3584 | 212.5  | 114.82 | 50.06 | 42.59 | 31.67 |
| 3586 | 212.23 | 114.76 | 50.03 | 42.57 | 31.66 |
| 3588 | 211.98 | 114.73 | 50.03 | 42.57 | 31.67 |
| 3590 | 211.71 | 114.67 | 50    | 42.55 | 31.65 |
| 3592 | 211.42 | 114.59 | 49.96 | 42.52 | 31.63 |
| 3594 | 211.13 | 114.53 | 49.95 | 42.5  | 31.62 |
| 3596 | 210.92 | 114.53 | 49.98 | 42.54 | 31.67 |
| 3598 | 210.6  | 114.44 | 49.91 | 42.49 | 31.61 |
| 3600 | 210.36 | 114.41 | 49.94 | 42.51 | 31.65 |
| 3602 | 210.1  | 114.36 | 49.92 | 42.5  | 31.65 |
| 3604 | 209.83 | 114.3  | 49.9  | 42.47 | 31.64 |
| 3606 | 209.54 | 114.22 | 49.86 | 42.44 | 31.62 |
| 3608 | 209.27 | 114.15 | 49.83 | 42.4  | 31.6  |
| 3610 | 208.98 | 114.11 | 49.83 | 42.4  | 31.6  |
| 3612 | 208.74 | 114.06 | 49.82 | 42.39 | 31.6  |
| 3614 | 208.46 | 113.99 | 49.78 | 42.37 | 31.58 |
| 3616 | 208.17 | 113.94 | 49.77 | 42.35 | 31.58 |
| 3618 | 207.9  | 113.85 | 49.73 | 42.31 | 31.55 |
| 3620 | 207.67 | 113.82 | 49.73 | 42.32 | 31.56 |
| 3622 | 207.41 | 113.77 | 49.71 | 42.31 | 31.54 |
| 3624 | 207.1  | 113.69 | 49.69 | 42.29 | 31.53 |
| 3626 | 206.85 | 113.63 | 49.65 | 42.27 | 31.51 |
| 3628 | 206.58 | 113.55 | 49.61 | 42.24 | 31.5  |
| 3630 | 206.35 | 113.52 | 49.62 | 42.24 | 31.51 |
| 3632 | 206.11 | 113.48 | 49.63 | 42.25 | 31.53 |
| 3634 | 205.81 | 113.42 | 49.6  | 42.23 | 31.51 |
| 3636 | 205.54 | 113.35 | 49.57 | 42.2  | 31.49 |
| 3638 | 205.29 | 113.29 | 49.55 | 42.18 | 31.48 |
| 3640 | 204.95 | 113.2  | 49.5  | 42.13 | 31.44 |
| 3642 | 204.74 | 113.15 | 49.5  | 42.15 | 31.46 |
| 3644 | 204.5  | 113.12 | 49.51 | 42.15 | 31.47 |
| 3646 | 204.24 | 113.05 | 49.48 | 42.12 | 31.45 |
| 3648 | 203.94 | 112.98 | 49.45 | 42.1  | 31.43 |
| 3650 | 203.71 | 112.94 | 49.43 | 42.08 | 31.44 |
| 3652 | 203.44 | 112.87 | 49.41 | 42.06 | 31.41 |
| 3654 | 203.19 | 112.81 | 49.38 | 42.04 | 31.4  |
| 3656 | 202.97 | 112.76 | 49.37 | 42.03 | 31.41 |
| 3658 | 202.68 | 112.71 | 49.38 | 42.06 | 31.42 |
| 3660 | 202.41 | 112.64 | 49.34 | 42.01 | 31.4  |
| 3662 | 202.11 | 112.53 | 49.26 | 41.93 | 31.33 |
| 3664 | 201.83 | 112.48 | 49.26 | 41.92 | 31.34 |

|      |        |        |       |       |       |
|------|--------|--------|-------|-------|-------|
| 3666 | 201.6  | 112.44 | 49.25 | 41.92 | 31.35 |
| 3668 | 201.32 | 112.34 | 49.19 | 41.86 | 31.3  |
| 3670 | 201.11 | 112.33 | 49.21 | 41.88 | 31.32 |
| 3672 | 200.8  | 112.26 | 49.18 | 41.87 | 31.3  |
| 3674 | 200.54 | 112.17 | 49.16 | 41.83 | 31.28 |
| 3676 | 200.27 | 112.09 | 49.1  | 41.78 | 31.25 |
| 3678 | 200.04 | 112.05 | 49.09 | 41.78 | 31.26 |
| 3680 | 199.75 | 111.98 | 49.07 | 41.77 | 31.24 |
| 3682 | 199.49 | 111.91 | 49.04 | 41.75 | 31.22 |
| 3684 | 199.26 | 111.87 | 49.04 | 41.73 | 31.22 |
| 3686 | 199.01 | 111.8  | 49.01 | 41.71 | 31.2  |
| 3688 | 198.72 | 111.72 | 48.98 | 41.69 | 31.18 |
| 3690 | 198.47 | 111.67 | 48.96 | 41.67 | 31.17 |
| 3692 | 198.27 | 111.64 | 48.97 | 41.68 | 31.18 |
| 3694 | 198    | 111.56 | 48.93 | 41.65 | 31.15 |
| 3696 | 197.71 | 111.5  | 48.91 | 41.63 | 31.15 |
| 3698 | 197.48 | 111.45 | 48.91 | 41.62 | 31.15 |
| 3700 | 197.28 | 111.42 | 48.91 | 41.63 | 31.18 |
| 3702 | 197.02 | 111.34 | 48.88 | 41.61 | 31.16 |
| 3704 | 196.76 | 111.28 | 48.87 | 41.6  | 31.16 |
| 3706 | 196.51 | 111.21 | 48.83 | 41.57 | 31.14 |
| 3708 | 196.24 | 111.12 | 48.79 | 41.52 | 31.09 |
| 3710 | 195.99 | 111.05 | 48.76 | 41.49 | 31.07 |
| 3712 | 195.76 | 111.01 | 48.76 | 41.49 | 31.07 |
| 3714 | 195.48 | 110.92 | 48.72 | 41.45 | 31.05 |
| 3716 | 195.25 | 110.87 | 48.7  | 41.46 | 31.06 |
| 3718 | 195.02 | 110.82 | 48.71 | 41.46 | 31.06 |
| 3720 | 194.78 | 110.78 | 48.71 | 41.48 | 31.08 |
| 3722 | 194.51 | 110.7  | 48.66 | 41.42 | 31.04 |
| 3724 | 194.27 | 110.62 | 48.64 | 41.4  | 31.02 |
| 3726 | 194.09 | 110.61 | 48.66 | 41.42 | 31.04 |
| 3728 | 193.76 | 110.51 | 48.59 | 41.36 | 30.98 |
| 3730 | 193.53 | 110.42 | 48.56 | 41.34 | 30.97 |
| 3732 | 193.3  | 110.36 | 48.55 | 41.32 | 30.95 |
| 3734 | 193.02 | 110.27 | 48.5  | 41.27 | 30.92 |
| 3736 | 192.78 | 110.23 | 48.5  | 41.27 | 30.95 |
| 3738 | 192.54 | 110.18 | 48.48 | 41.26 | 30.94 |
| 3740 | 192.31 | 110.11 | 48.45 | 41.23 | 30.92 |
| 3742 | 192.09 | 110.05 | 48.45 | 41.23 | 30.92 |
| 3744 | 191.88 | 110    | 48.44 | 41.22 | 30.92 |
| 3746 | 191.63 | 109.96 | 48.44 | 41.23 | 30.92 |
| 3748 | 191.38 | 109.88 | 48.4  | 41.19 | 30.91 |
| 3750 | 191.14 | 109.81 | 48.37 | 41.16 | 30.88 |
| 3752 | 190.9  | 109.76 | 48.37 | 41.17 | 30.9  |

|      |        |        |       |       |       |
|------|--------|--------|-------|-------|-------|
| 3754 | 190.67 | 109.7  | 48.36 | 41.16 | 30.88 |
| 3756 | 190.48 | 109.68 | 48.38 | 41.18 | 30.91 |
| 3758 | 190.26 | 109.62 | 48.36 | 41.17 | 30.91 |
| 3760 | 189.99 | 109.55 | 48.34 | 41.16 | 30.9  |
| 3762 | 189.76 | 109.49 | 48.32 | 41.14 | 30.89 |
| 3764 | 189.53 | 109.43 | 48.3  | 41.11 | 30.88 |
| 3766 | 189.27 | 109.34 | 48.26 | 41.08 | 30.85 |
| 3768 | 189.02 | 109.29 | 48.24 | 41.06 | 30.86 |
| 3770 | 188.8  | 109.22 | 48.22 | 41.04 | 30.84 |
| 3772 | 188.53 | 109.12 | 48.17 | 40.99 | 30.79 |
| 3774 | 188.31 | 109.07 | 48.16 | 40.97 | 30.79 |
| 3776 | 188.06 | 109.01 | 48.16 | 40.98 | 30.81 |
| 3778 | 187.85 | 108.96 | 48.14 | 40.97 | 30.8  |
| 3780 | 187.65 | 108.92 | 48.14 | 40.97 | 30.8  |
| 3782 | 187.41 | 108.84 | 48.1  | 40.94 | 30.77 |
| 3784 | 187.13 | 108.75 | 48.05 | 40.9  | 30.74 |
| 3786 | 186.95 | 108.74 | 48.09 | 40.94 | 30.78 |
| 3788 | 186.72 | 108.67 | 48.06 | 40.92 | 30.76 |
| 3790 | 186.49 | 108.61 | 48.05 | 40.9  | 30.77 |
| 3792 | 186.25 | 108.57 | 48.05 | 40.9  | 30.76 |
| 3794 | 186.03 | 108.49 | 48.02 | 40.87 | 30.75 |
| 3796 | 185.78 | 108.4  | 47.96 | 40.81 | 30.72 |
| 3798 | 185.53 | 108.33 | 47.95 | 40.8  | 30.71 |
| 3800 | 185.28 | 108.25 | 47.93 | 40.79 | 30.71 |
| 3802 | 185.04 | 108.18 | 47.9  | 40.76 | 30.68 |
| 3804 | 184.8  | 108.11 | 47.87 | 40.73 | 30.65 |
| 3806 | 184.58 | 108.05 | 47.85 | 40.71 | 30.65 |
| 3808 | 184.38 | 108    | 47.84 | 40.71 | 30.65 |
| 3810 | 184.1  | 107.92 | 47.81 | 40.69 | 30.62 |
| 3812 | 183.89 | 107.87 | 47.79 | 40.68 | 30.62 |
| 3814 | 183.69 | 107.82 | 47.79 | 40.66 | 30.62 |
| 3816 | 183.44 | 107.76 | 47.79 | 40.67 | 30.63 |
| 3818 | 183.22 | 107.68 | 47.75 | 40.63 | 30.6  |
| 3820 | 183    | 107.63 | 47.73 | 40.62 | 30.59 |
| 3822 | 182.8  | 107.59 | 47.72 | 40.61 | 30.59 |
| 3824 | 182.56 | 107.52 | 47.71 | 40.59 | 30.59 |
| 3826 | 182.37 | 107.49 | 47.73 | 40.62 | 30.62 |
| 3828 | 182.14 | 107.43 | 47.72 | 40.6  | 30.63 |
| 3830 | 181.93 | 107.37 | 47.7  | 40.58 | 30.62 |
| 3832 | 181.7  | 107.3  | 47.66 | 40.55 | 30.58 |
| 3834 | 181.42 | 107.18 | 47.61 | 40.5  | 30.54 |
| 3836 | 181.18 | 107.12 | 47.57 | 40.48 | 30.52 |
| 3838 | 180.98 | 107.07 | 47.57 | 40.47 | 30.52 |
| 3840 | 180.73 | 107.01 | 47.55 | 40.45 | 30.51 |

|      |        |        |       |       |       |
|------|--------|--------|-------|-------|-------|
| 3842 | 180.52 | 106.94 | 47.53 | 40.44 | 30.5  |
| 3844 | 180.37 | 106.94 | 47.58 | 40.48 | 30.54 |
| 3846 | 180.17 | 106.88 | 47.56 | 40.48 | 30.54 |
| 3848 | 179.95 | 106.83 | 47.54 | 40.47 | 30.54 |
| 3850 | 179.71 | 106.75 | 47.53 | 40.44 | 30.53 |
| 3852 | 179.44 | 106.64 | 47.46 | 40.38 | 30.46 |
| 3854 | 179.26 | 106.61 | 47.47 | 40.38 | 30.48 |
| 3856 | 179.01 | 106.55 | 47.46 | 40.37 | 30.47 |
| 3858 | 178.78 | 106.45 | 47.42 | 40.35 | 30.47 |
| 3860 | 178.54 | 106.36 | 47.37 | 40.29 | 30.43 |
| 3862 | 178.32 | 106.29 | 47.34 | 40.26 | 30.4  |
| 3864 | 178.1  | 106.23 | 47.34 | 40.27 | 30.4  |
| 3866 | 177.89 | 106.18 | 47.32 | 40.25 | 30.39 |
| 3868 | 177.68 | 106.12 | 47.31 | 40.24 | 30.38 |
| 3870 | 177.48 | 106.07 | 47.31 | 40.25 | 30.4  |
| 3872 | 177.29 | 106.04 | 47.32 | 40.24 | 30.41 |
| 3874 | 177.07 | 105.96 | 47.3  | 40.25 | 30.41 |
| 3876 | 176.84 | 105.88 | 47.26 | 40.21 | 30.37 |
| 3878 | 176.68 | 105.86 | 47.28 | 40.23 | 30.4  |
| 3880 | 176.45 | 105.8  | 47.26 | 40.21 | 30.38 |
| 3882 | 176.23 | 105.73 | 47.24 | 40.2  | 30.38 |
| 3884 | 176.02 | 105.67 | 47.23 | 40.18 | 30.37 |
| 3886 | 175.81 | 105.6  | 47.2  | 40.15 | 30.35 |
| 3888 | 175.58 | 105.54 | 47.2  | 40.15 | 30.35 |
| 3890 | 175.37 | 105.47 | 47.18 | 40.14 | 30.35 |
| 3892 | 175.16 | 105.41 | 47.16 | 40.12 | 30.34 |
| 3894 | 174.95 | 105.35 | 47.13 | 40.09 | 30.33 |
| 3896 | 174.71 | 105.29 | 47.12 | 40.07 | 30.32 |
| 3898 | 174.51 | 105.21 | 47.1  | 40.06 | 30.31 |
| 3900 | 174.31 | 105.15 | 47.08 | 40.05 | 30.3  |
| 3902 | 174.13 | 105.13 | 47.1  | 40.06 | 30.32 |
| 3904 | 173.91 | 105.05 | 47.07 | 40.02 | 30.29 |
| 3906 | 173.65 | 104.95 | 47.03 | 39.99 | 30.26 |
| 3908 | 173.44 | 104.87 | 46.99 | 39.97 | 30.24 |
| 3910 | 173.21 | 104.79 | 46.96 | 39.94 | 30.21 |
| 3912 | 172.99 | 104.74 | 46.95 | 39.94 | 30.21 |
| 3914 | 172.79 | 104.67 | 46.92 | 39.9  | 30.19 |
| 3916 | 172.61 | 104.64 | 46.95 | 39.93 | 30.23 |
| 3918 | 172.4  | 104.59 | 46.93 | 39.91 | 30.21 |
| 3920 | 172.16 | 104.52 | 46.91 | 39.88 | 30.2  |
| 3922 | 171.97 | 104.46 | 46.9  | 39.89 | 30.2  |
| 3924 | 171.76 | 104.39 | 46.88 | 39.88 | 30.19 |
| 3926 | 171.53 | 104.3  | 46.82 | 39.82 | 30.15 |
| 3928 | 171.33 | 104.25 | 46.82 | 39.82 | 30.16 |

|      |        |        |       |       |       |
|------|--------|--------|-------|-------|-------|
| 3930 | 171.08 | 104.17 | 46.79 | 39.79 | 30.14 |
| 3932 | 170.89 | 104.1  | 46.78 | 39.76 | 30.13 |
| 3934 | 170.72 | 104.06 | 46.78 | 39.77 | 30.14 |
| 3936 | 170.49 | 104.01 | 46.77 | 39.77 | 30.15 |
| 3938 | 170.28 | 103.93 | 46.74 | 39.75 | 30.13 |
| 3940 | 170.09 | 103.87 | 46.72 | 39.73 | 30.12 |
| 3942 | 169.9  | 103.82 | 46.72 | 39.73 | 30.11 |
| 3944 | 169.66 | 103.75 | 46.7  | 39.72 | 30.12 |
| 3946 | 169.47 | 103.69 | 46.69 | 39.7  | 30.11 |
| 3948 | 169.27 | 103.63 | 46.67 | 39.68 | 30.09 |
| 3950 | 169.07 | 103.57 | 46.65 | 39.67 | 30.09 |
| 3952 | 168.87 | 103.5  | 46.62 | 39.64 | 30.06 |
| 3954 | 168.65 | 103.44 | 46.61 | 39.64 | 30.07 |
| 3956 | 168.46 | 103.38 | 46.6  | 39.63 | 30.07 |
| 3958 | 168.27 | 103.32 | 46.58 | 39.62 | 30.05 |
| 3960 | 168.03 | 103.26 | 46.56 | 39.6  | 30.03 |
| 3962 | 167.85 | 103.22 | 46.57 | 39.61 | 30.06 |
| 3964 | 167.66 | 103.15 | 46.56 | 39.59 | 30.05 |
| 3966 | 167.44 | 103.07 | 46.52 | 39.55 | 30.02 |
| 3968 | 167.26 | 103.03 | 46.5  | 39.54 | 30.02 |
| 3970 | 167.04 | 102.97 | 46.52 | 39.56 | 30.04 |
| 3972 | 166.82 | 102.88 | 46.46 | 39.51 | 30.01 |
| 3974 | 166.63 | 102.82 | 46.46 | 39.51 | 30.01 |
| 3976 | 166.4  | 102.75 | 46.43 | 39.48 | 29.98 |
| 3978 | 166.21 | 102.68 | 46.41 | 39.46 | 29.97 |
| 3980 | 166.01 | 102.62 | 46.39 | 39.44 | 29.96 |
| 3982 | 165.83 | 102.56 | 46.38 | 39.44 | 29.97 |
| 3984 | 165.61 | 102.49 | 46.36 | 39.42 | 29.95 |
| 3986 | 165.45 | 102.46 | 46.37 | 39.42 | 29.97 |
| 3988 | 165.23 | 102.38 | 46.34 | 39.4  | 29.94 |
| 3990 | 165.03 | 102.31 | 46.32 | 39.38 | 29.92 |
| 3992 | 164.81 | 102.24 | 46.3  | 39.37 | 29.91 |
| 3994 | 164.62 | 102.18 | 46.28 | 39.35 | 29.91 |
| 3996 | 164.45 | 102.14 | 46.27 | 39.35 | 29.91 |
| 3998 | 164.25 | 102.07 | 46.25 | 39.33 | 29.9  |
| 4000 | 164.01 | 101.99 | 46.23 | 39.31 | 29.88 |
| 4002 | 163.86 | 101.96 | 46.25 | 39.34 | 29.92 |
| 4004 | 163.7  | 101.92 | 46.25 | 39.34 | 29.93 |
| 4006 | 163.48 | 101.81 | 46.2  | 39.28 | 29.88 |
| 4008 | 163.27 | 101.75 | 46.18 | 39.26 | 29.86 |
| 4010 | 163.09 | 101.7  | 46.17 | 39.25 | 29.87 |
| 4012 | 162.87 | 101.6  | 46.13 | 39.22 | 29.83 |
| 4014 | 162.68 | 101.54 | 46.12 | 39.21 | 29.83 |
| 4016 | 162.47 | 101.49 | 46.09 | 39.18 | 29.82 |

|      |        |        |       |       |       |
|------|--------|--------|-------|-------|-------|
| 4018 | 162.26 | 101.4  | 46.06 | 39.16 | 29.81 |
| 4020 | 162.09 | 101.35 | 46.06 | 39.17 | 29.83 |
| 4022 | 161.9  | 101.28 | 46.04 | 39.14 | 29.79 |
| 4024 | 161.67 | 101.2  | 46.02 | 39.11 | 29.78 |
| 4026 | 161.45 | 101.1  | 45.95 | 39.07 | 29.75 |
| 4028 | 161.28 | 101.05 | 45.94 | 39.04 | 29.73 |
| 4030 | 161.1  | 101    | 45.94 | 39.04 | 29.73 |
| 4032 | 160.9  | 100.91 | 45.9  | 39.01 | 29.7  |
| 4034 | 160.69 | 100.86 | 45.9  | 39.02 | 29.71 |
| 4036 | 160.54 | 100.83 | 45.91 | 39.03 | 29.73 |
| 4038 | 160.36 | 100.77 | 45.9  | 39.01 | 29.72 |
| 4040 | 160.13 | 100.7  | 45.87 | 38.99 | 29.7  |
| 4042 | 159.94 | 100.63 | 45.86 | 38.98 | 29.7  |
| 4044 | 159.77 | 100.58 | 45.85 | 38.97 | 29.7  |
| 4046 | 159.59 | 100.52 | 45.83 | 38.96 | 29.69 |
| 4048 | 159.39 | 100.46 | 45.84 | 38.97 | 29.71 |
| 4050 | 159.19 | 100.39 | 45.8  | 38.92 | 29.68 |
| 4052 | 159.04 | 100.35 | 45.8  | 38.92 | 29.67 |
| 4054 | 158.86 | 100.29 | 45.79 | 38.92 | 29.66 |
| 4056 | 158.65 | 100.21 | 45.75 | 38.89 | 29.64 |
| 4058 | 158.44 | 100.14 | 45.74 | 38.88 | 29.63 |
| 4060 | 158.26 | 100.08 | 45.72 | 38.86 | 29.62 |
| 4062 | 158.08 | 100.02 | 45.7  | 38.85 | 29.61 |
| 4064 | 157.86 | 99.96  | 45.69 | 38.83 | 29.61 |
| 4066 | 157.69 | 99.9   | 45.68 | 38.82 | 29.62 |
| 4068 | 157.5  | 99.83  | 45.65 | 38.79 | 29.59 |
| 4070 | 157.33 | 99.78  | 45.67 | 38.81 | 29.63 |
| 4072 | 157.1  | 99.69  | 45.62 | 38.77 | 29.58 |
| 4074 | 156.91 | 99.62  | 45.58 | 38.74 | 29.56 |
| 4076 | 156.74 | 99.58  | 45.58 | 38.74 | 29.58 |
| 4078 | 156.56 | 99.5   | 45.56 | 38.72 | 29.55 |
| 4080 | 156.38 | 99.44  | 45.54 | 38.7  | 29.54 |
| 4082 | 156.16 | 99.38  | 45.53 | 38.69 | 29.54 |
| 4084 | 155.99 | 99.3   | 45.5  | 38.67 | 29.52 |
| 4086 | 155.82 | 99.24  | 45.49 | 38.66 | 29.52 |
| 4088 | 155.63 | 99.2   | 45.49 | 38.67 | 29.53 |
| 4090 | 155.45 | 99.12  | 45.47 | 38.65 | 29.5  |
| 4092 | 155.28 | 99.08  | 45.47 | 38.65 | 29.5  |
| 4094 | 155.12 | 99.02  | 45.46 | 38.63 | 29.5  |
| 4096 | 154.9  | 98.95  | 45.42 | 38.6  | 29.49 |
| 4098 | 154.72 | 98.88  | 45.41 | 38.59 | 29.48 |
| 4100 | 154.57 | 98.86  | 45.42 | 38.61 | 29.51 |
| 4102 | 154.41 | 98.8   | 45.42 | 38.61 | 29.49 |
| 4104 | 154.22 | 98.74  | 45.41 | 38.6  | 29.51 |

|      |        |       |       |       |       |
|------|--------|-------|-------|-------|-------|
| 4106 | 154.02 | 98.67 | 45.39 | 38.58 | 29.49 |
| 4108 | 153.86 | 98.62 | 45.38 | 38.57 | 29.49 |
| 4110 | 153.68 | 98.56 | 45.35 | 38.55 | 29.48 |
| 4112 | 153.5  | 98.5  | 45.33 | 38.53 | 29.46 |
| 4114 | 153.27 | 98.39 | 45.27 | 38.49 | 29.44 |
| 4116 | 153.1  | 98.34 | 45.27 | 38.48 | 29.41 |
| 4118 | 152.89 | 98.25 | 45.23 | 38.44 | 29.38 |
| 4120 | 152.67 | 98.18 | 45.21 | 38.41 | 29.38 |
| 4122 | 152.49 | 98.12 | 45.19 | 38.4  | 29.36 |
| 4124 | 152.31 | 98.05 | 45.17 | 38.37 | 29.35 |
| 4126 | 152.16 | 98    | 45.18 | 38.4  | 29.38 |
| 4128 | 151.97 | 97.95 | 45.17 | 38.38 | 29.36 |
| 4130 | 151.79 | 97.87 | 45.13 | 38.36 | 29.36 |
| 4132 | 151.64 | 97.84 | 45.16 | 38.37 | 29.37 |
| 4134 | 151.5  | 97.8  | 45.16 | 38.38 | 29.38 |
| 4136 | 151.26 | 97.7  | 45.1  | 38.32 | 29.33 |
| 4138 | 151.12 | 97.68 | 45.13 | 38.35 | 29.36 |
| 4140 | 150.96 | 97.62 | 45.11 | 38.35 | 29.36 |
| 4142 | 150.77 | 97.55 | 45.09 | 38.33 | 29.35 |
| 4144 | 150.59 | 97.5  | 45.08 | 38.32 | 29.35 |
| 4146 | 150.4  | 97.4  | 45.03 | 38.26 | 29.29 |
| 4148 | 150.27 | 97.36 | 45.05 | 38.28 | 29.33 |
| 4150 | 150.09 | 97.31 | 45.03 | 38.27 | 29.32 |
| 4152 | 149.9  | 97.24 | 45.03 | 38.27 | 29.34 |
| 4154 | 149.7  | 97.15 | 44.98 | 38.22 | 29.28 |
| 4156 | 149.55 | 97.1  | 44.98 | 38.22 | 29.3  |
| 4158 | 149.37 | 97.05 | 44.96 | 38.2  | 29.29 |
| 4160 | 149.18 | 96.98 | 44.95 | 38.19 | 29.28 |
| 4162 | 149.01 | 96.91 | 44.93 | 38.17 | 29.27 |
| 4164 | 148.84 | 96.85 | 44.91 | 38.16 | 29.26 |
| 4166 | 148.67 | 96.79 | 44.9  | 38.15 | 29.26 |
| 4168 | 148.47 | 96.73 | 44.89 | 38.13 | 29.26 |
| 4170 | 148.32 | 96.67 | 44.88 | 38.12 | 29.25 |
| 4172 | 148.15 | 96.62 | 44.87 | 38.12 | 29.25 |
| 4174 | 147.96 | 96.54 | 44.84 | 38.1  | 29.23 |
| 4176 | 147.78 | 96.47 | 44.82 | 38.08 | 29.22 |
| 4178 | 147.62 | 96.41 | 44.8  | 38.07 | 29.21 |
| 4180 | 147.45 | 96.34 | 44.79 | 38.05 | 29.2  |
| 4182 | 147.29 | 96.29 | 44.77 | 38.04 | 29.21 |
| 4184 | 147.1  | 96.23 | 44.75 | 38.02 | 29.19 |
| 4186 | 146.9  | 96.12 | 44.7  | 37.97 | 29.15 |
| 4188 | 146.75 | 96.07 | 44.7  | 37.98 | 29.15 |
| 4190 | 146.6  | 96.03 | 44.71 | 37.99 | 29.15 |
| 4192 | 146.41 | 95.96 | 44.68 | 37.96 | 29.13 |

|      |        |       |       |       |       |
|------|--------|-------|-------|-------|-------|
| 4194 | 146.2  | 95.86 | 44.62 | 37.91 | 29.09 |
| 4196 | 146.03 | 95.8  | 44.61 | 37.89 | 29.09 |
| 4198 | 145.89 | 95.77 | 44.61 | 37.9  | 29.08 |
| 4200 | 145.7  | 95.72 | 44.61 | 37.9  | 29.09 |
| 4202 | 145.51 | 95.63 | 44.57 | 37.86 | 29.07 |
| 4204 | 145.34 | 95.55 | 44.54 | 37.83 | 29.05 |
| 4206 | 145.18 | 95.49 | 44.53 | 37.81 | 29.05 |
| 4208 | 145.02 | 95.44 | 44.52 | 37.81 | 29.05 |
| 4210 | 144.85 | 95.38 | 44.49 | 37.8  | 29.05 |
| 4212 | 144.68 | 95.32 | 44.49 | 37.78 | 29.03 |
| 4214 | 144.53 | 95.26 | 44.49 | 37.8  | 29.05 |
| 4216 | 144.35 | 95.18 | 44.46 | 37.76 | 29.02 |
| 4218 | 144.18 | 95.13 | 44.44 | 37.75 | 29.01 |
| 4220 | 144.02 | 95.07 | 44.42 | 37.73 | 29    |
| 4222 | 143.84 | 95    | 44.4  | 37.71 | 28.97 |
| 4224 | 143.66 | 94.94 | 44.39 | 37.71 | 28.97 |
| 4226 | 143.51 | 94.89 | 44.38 | 37.7  | 28.96 |
| 4228 | 143.39 | 94.85 | 44.38 | 37.7  | 28.97 |
| 4230 | 143.19 | 94.76 | 44.34 | 37.66 | 28.96 |
| 4232 | 143.09 | 94.76 | 44.38 | 37.7  | 28.99 |
| 4234 | 142.86 | 94.66 | 44.33 | 37.65 | 28.96 |
| 4236 | 142.71 | 94.61 | 44.31 | 37.65 | 28.95 |
| 4238 | 142.56 | 94.55 | 44.31 | 37.64 | 28.95 |
| 4240 | 142.42 | 94.5  | 44.31 | 37.63 | 28.95 |
| 4242 | 142.22 | 94.41 | 44.28 | 37.6  | 28.93 |
| 4244 | 142.04 | 94.33 | 44.23 | 37.56 | 28.9  |
| 4246 | 141.89 | 94.28 | 44.23 | 37.56 | 28.9  |
| 4248 | 141.74 | 94.25 | 44.25 | 37.58 | 28.92 |
| 4250 | 141.6  | 94.2  | 44.24 | 37.58 | 28.91 |
| 4252 | 141.41 | 94.11 | 44.2  | 37.55 | 28.9  |
| 4254 | 141.24 | 94.03 | 44.18 | 37.51 | 28.87 |
| 4256 | 141.09 | 94    | 44.2  | 37.54 | 28.9  |
| 4258 | 140.92 | 93.93 | 44.16 | 37.51 | 28.89 |
| 4260 | 140.75 | 93.86 | 44.13 | 37.47 | 28.85 |
| 4262 | 140.58 | 93.8  | 44.13 | 37.47 | 28.85 |
| 4264 | 140.43 | 93.74 | 44.12 | 37.46 | 28.85 |
| 4266 | 140.25 | 93.68 | 44.1  | 37.44 | 28.84 |
| 4268 | 140.09 | 93.6  | 44.06 | 37.41 | 28.81 |
| 4270 | 139.95 | 93.57 | 44.07 | 37.43 | 28.84 |
| 4272 | 139.77 | 93.5  | 44.05 | 37.41 | 28.83 |
| 4274 | 139.66 | 93.48 | 44.07 | 37.43 | 28.85 |
| 4276 | 139.44 | 93.38 | 44.01 | 37.36 | 28.78 |
| 4278 | 139.3  | 93.32 | 44    | 37.35 | 28.79 |
| 4280 | 139.15 | 93.29 | 44.01 | 37.37 | 28.8  |



|      |        |       |       |       |       |
|------|--------|-------|-------|-------|-------|
| 4282 | 139.01 | 93.23 | 44    | 37.36 | 28.79 |
| 4284 | 138.84 | 93.15 | 43.97 | 37.35 | 28.8  |
| 4286 | 138.71 | 93.11 | 43.97 | 37.34 | 28.81 |
| 4288 | 138.5  | 93.01 | 43.93 | 37.3  | 28.78 |
| 4290 | 138.33 | 92.93 | 43.89 | 37.25 | 28.74 |
| 4292 | 138.18 | 92.87 | 43.87 | 37.24 | 28.73 |
| 4294 | 138.03 | 92.82 | 43.86 | 37.22 | 28.72 |
| 4296 | 137.88 | 92.77 | 43.86 | 37.23 | 28.72 |
| 4298 | 137.76 | 92.74 | 43.88 | 37.24 | 28.74 |
| 4300 | 137.62 | 92.69 | 43.87 | 37.25 | 28.76 |
| 4302 | 137.43 | 92.6  | 43.84 | 37.21 | 28.73 |
| 4304 | 137.24 | 92.53 | 43.81 | 37.19 | 28.7  |
| 4306 | 137.13 | 92.5  | 43.83 | 37.21 | 28.73 |
| 4308 | 136.99 | 92.46 | 43.82 | 37.21 | 28.73 |
| 4310 | 136.85 | 92.4  | 43.81 | 37.2  | 28.72 |
| 4312 | 136.66 | 92.33 | 43.79 | 37.18 | 28.71 |
| 4314 | 136.52 | 92.27 | 43.77 | 37.17 | 28.71 |
| 4316 | 136.37 | 92.21 | 43.76 | 37.16 | 28.69 |
| 4318 | 136.21 | 92.15 | 43.74 | 37.14 | 28.68 |
| 4320 | 136.04 | 92.09 | 43.73 | 37.12 | 28.68 |
| 4322 | 135.87 | 92    | 43.69 | 37.08 | 28.65 |
| 4324 | 135.73 | 91.95 | 43.69 | 37.08 | 28.67 |
| 4326 | 135.56 | 91.87 | 43.66 | 37.05 | 28.65 |
| 4328 | 135.41 | 91.83 | 43.65 | 37.05 | 28.65 |
| 4330 | 135.26 | 91.79 | 43.65 | 37.05 | 28.65 |
| 4332 | 135.11 | 91.73 | 43.64 | 37.04 | 28.65 |
| 4334 | 134.97 | 91.67 | 43.62 | 37.03 | 28.64 |
| 4336 | 134.78 | 91.6  | 43.6  | 37.01 | 28.63 |
| 4338 | 134.65 | 91.55 | 43.59 | 37    | 28.63 |
| 4340 | 134.51 | 91.49 | 43.58 | 36.99 | 28.62 |
| 4342 | 134.37 | 91.44 | 43.57 | 36.98 | 28.62 |
| 4344 | 134.2  | 91.37 | 43.56 | 36.98 | 28.6  |
| 4346 | 134.09 | 91.35 | 43.58 | 37    | 28.63 |
| 4348 | 133.92 | 91.26 | 43.53 | 36.96 | 28.6  |
| 4350 | 133.77 | 91.2  | 43.52 | 36.93 | 28.59 |
| 4352 | 133.61 | 91.14 | 43.5  | 36.92 | 28.57 |
| 4354 | 133.49 | 91.1  | 43.5  | 36.95 | 28.6  |
| 4356 | 133.34 | 91.05 | 43.49 | 36.93 | 28.6  |
| 4358 | 133.17 | 90.97 | 43.45 | 36.89 | 28.56 |
| 4360 | 133.02 | 90.92 | 43.45 | 36.89 | 28.57 |
| 4362 | 132.89 | 90.87 | 43.45 | 36.89 | 28.58 |
| 4364 | 132.75 | 90.83 | 43.46 | 36.89 | 28.59 |
| 4366 | 132.6  | 90.77 | 43.45 | 36.89 | 28.59 |
| 4368 | 132.43 | 90.68 | 43.4  | 36.83 | 28.55 |

|      |        |       |       |       |       |
|------|--------|-------|-------|-------|-------|
| 4370 | 132.23 | 90.59 | 43.36 | 36.8  | 28.52 |
| 4372 | 132.11 | 90.56 | 43.37 | 36.82 | 28.55 |
| 4374 | 131.95 | 90.49 | 43.35 | 36.79 | 28.52 |
| 4376 | 131.82 | 90.45 | 43.34 | 36.79 | 28.52 |
| 4378 | 131.64 | 90.36 | 43.31 | 36.76 | 28.51 |
| 4380 | 131.49 | 90.32 | 43.31 | 36.75 | 28.51 |
| 4382 | 131.38 | 90.28 | 43.32 | 36.76 | 28.52 |
| 4384 | 131.19 | 90.19 | 43.26 | 36.72 | 28.48 |
| 4386 | 131.05 | 90.12 | 43.25 | 36.7  | 28.48 |
| 4388 | 130.9  | 90.06 | 43.24 | 36.69 | 28.47 |
| 4390 | 130.76 | 90    | 43.22 | 36.67 | 28.46 |
| 4392 | 130.65 | 89.96 | 43.22 | 36.69 | 28.47 |
| 4394 | 130.47 | 89.89 | 43.2  | 36.67 | 28.46 |
| 4396 | 130.33 | 89.83 | 43.17 | 36.64 | 28.42 |
| 4398 | 130.19 | 89.77 | 43.17 | 36.64 | 28.43 |
| 4400 | 130.04 | 89.72 | 43.15 | 36.62 | 28.43 |
| 4402 | 129.84 | 89.61 | 43.1  | 36.57 | 28.38 |
| 4404 | 129.74 | 89.59 | 43.12 | 36.59 | 28.41 |
| 4406 | 129.59 | 89.53 | 43.1  | 36.58 | 28.4  |
| 4408 | 129.44 | 89.48 | 43.1  | 36.57 | 28.41 |
| 4410 | 129.3  | 89.42 | 43.07 | 36.55 | 28.4  |
| 4412 | 129.16 | 89.36 | 43.06 | 36.53 | 28.39 |
| 4414 | 129.01 | 89.3  | 43.04 | 36.53 | 28.38 |
| 4416 | 128.86 | 89.24 | 43.04 | 36.52 | 28.38 |
| 4418 | 128.69 | 89.16 | 42.99 | 36.48 | 28.35 |
| 4420 | 128.58 | 89.13 | 43    | 36.49 | 28.37 |
| 4422 | 128.45 | 89.07 | 42.99 | 36.48 | 28.36 |
| 4424 | 128.33 | 89.02 | 42.98 | 36.47 | 28.35 |
| 4426 | 128.17 | 88.95 | 42.97 | 36.46 | 28.34 |
| 4428 | 128.03 | 88.9  | 42.95 | 36.46 | 28.34 |
| 4430 | 127.89 | 88.84 | 42.94 | 36.44 | 28.33 |
| 4432 | 127.73 | 88.78 | 42.93 | 36.43 | 28.32 |
| 4434 | 127.62 | 88.73 | 42.93 | 36.44 | 28.33 |
| 4436 | 127.46 | 88.67 | 42.92 | 36.42 | 28.33 |
| 4438 | 127.28 | 88.58 | 42.85 | 36.36 | 28.28 |
| 4440 | 127.19 | 88.57 | 42.89 | 36.4  | 28.33 |
| 4442 | 127.07 | 88.52 | 42.88 | 36.39 | 28.32 |
| 4444 | 126.9  | 88.43 | 42.84 | 36.35 | 28.3  |
| 4446 | 126.78 | 88.38 | 42.84 | 36.35 | 28.3  |
| 4448 | 126.65 | 88.35 | 42.84 | 36.35 | 28.32 |
| 4450 | 126.49 | 88.26 | 42.81 | 36.31 | 28.28 |
| 4452 | 126.36 | 88.21 | 42.79 | 36.31 | 28.27 |
| 4454 | 126.22 | 88.14 | 42.77 | 36.29 | 28.25 |
| 4456 | 126.08 | 88.09 | 42.79 | 36.3  | 28.26 |

|      |        |       |       |       |       |
|------|--------|-------|-------|-------|-------|
| 4458 | 125.92 | 88.01 | 42.74 | 36.27 | 28.23 |
| 4460 | 125.79 | 87.95 | 42.72 | 36.26 | 28.23 |
| 4462 | 125.66 | 87.9  | 42.72 | 36.25 | 28.23 |
| 4464 | 125.55 | 87.86 | 42.72 | 36.25 | 28.23 |
| 4466 | 125.38 | 87.79 | 42.7  | 36.22 | 28.21 |
| 4468 | 125.23 | 87.73 | 42.67 | 36.19 | 28.2  |
| 4470 | 125.05 | 87.63 | 42.61 | 36.13 | 28.15 |
| 4472 | 124.91 | 87.59 | 42.61 | 36.12 | 28.15 |
| 4474 | 124.79 | 87.54 | 42.61 | 36.14 | 28.17 |
| 4476 | 124.66 | 87.47 | 42.6  | 36.13 | 28.17 |
| 4478 | 124.51 | 87.42 | 42.57 | 36.12 | 28.17 |
| 4480 | 124.37 | 87.36 | 42.57 | 36.11 | 28.17 |
| 4482 | 124.23 | 87.3  | 42.54 | 36.08 | 28.14 |
| 4484 | 124.08 | 87.23 | 42.52 | 36.06 | 28.1  |
| 4486 | 123.94 | 87.16 | 42.49 | 36.04 | 28.09 |
| 4488 | 123.79 | 87.1  | 42.48 | 36.02 | 28.08 |
| 4490 | 123.66 | 87.04 | 42.46 | 36.01 | 28.08 |
| 4492 | 123.53 | 86.98 | 42.44 | 35.98 | 28.06 |
| 4494 | 123.41 | 86.94 | 42.44 | 35.99 | 28.07 |
| 4496 | 123.26 | 86.88 | 42.42 | 35.97 | 28.06 |
| 4498 | 123.1  | 86.78 | 42.37 | 35.91 | 28.02 |
| 4500 | 122.98 | 86.74 | 42.37 | 35.92 | 28.03 |
| 4502 | 122.86 | 86.69 | 42.37 | 35.92 | 28.02 |
| 4504 | 122.71 | 86.62 | 42.33 | 35.89 | 28    |
| 4506 | 122.59 | 86.58 | 42.34 | 35.89 | 28.02 |
| 4508 | 122.48 | 86.54 | 42.34 | 35.9  | 28.02 |
| 4510 | 122.35 | 86.48 | 42.33 | 35.88 | 28.02 |
| 4512 | 122.21 | 86.41 | 42.3  | 35.86 | 27.98 |
| 4514 | 122.09 | 86.36 | 42.3  | 35.87 | 27.99 |
| 4516 | 121.98 | 86.34 | 42.32 | 35.9  | 28.02 |
| 4518 | 121.85 | 86.28 | 42.3  | 35.88 | 28.01 |
| 4520 | 121.69 | 86.21 | 42.27 | 35.84 | 28    |
| 4522 | 121.62 | 86.2  | 42.3  | 35.88 | 28.02 |
| 4524 | 121.49 | 86.14 | 42.3  | 35.88 | 28.04 |
| 4526 | 121.37 | 86.09 | 42.29 | 35.86 | 28.04 |
| 4528 | 121.22 | 86.04 | 42.28 | 35.86 | 28.03 |
| 4530 | 121.08 | 85.96 | 42.26 | 35.83 | 28.02 |
| 4532 | 120.95 | 85.89 | 42.23 | 35.81 | 27.99 |
| 4534 | 120.82 | 85.84 | 42.21 | 35.78 | 27.98 |
| 4536 | 120.67 | 85.79 | 42.21 | 35.8  | 27.99 |
| 4538 | 120.54 | 85.73 | 42.18 | 35.77 | 27.98 |
| 4540 | 120.39 | 85.65 | 42.14 | 35.72 | 27.93 |
| 4542 | 120.28 | 85.62 | 42.16 | 35.74 | 27.95 |
| 4544 | 120.14 | 85.56 | 42.13 | 35.73 | 27.93 |

|      |        |       |       |       |       |
|------|--------|-------|-------|-------|-------|
| 4546 | 120    | 85.46 | 42.1  | 35.68 | 27.9  |
| 4548 | 119.88 | 85.42 | 42.07 | 35.67 | 27.9  |
| 4550 | 119.8  | 85.41 | 42.11 | 35.7  | 27.93 |
| 4552 | 119.63 | 85.34 | 42.09 | 35.67 | 27.91 |
| 4554 | 119.5  | 85.27 | 42.07 | 35.67 | 27.9  |
| 4556 | 119.33 | 85.18 | 42.01 | 35.62 | 27.86 |
| 4558 | 119.24 | 85.15 | 42.03 | 35.63 | 27.89 |
| 4560 | 119.06 | 85.06 | 41.98 | 35.59 | 27.86 |
| 4562 | 118.94 | 84.99 | 41.95 | 35.55 | 27.83 |
| 4564 | 118.84 | 84.96 | 41.97 | 35.57 | 27.84 |
| 4566 | 118.74 | 84.93 | 41.98 | 35.59 | 27.86 |
| 4568 | 118.63 | 84.88 | 41.96 | 35.56 | 27.85 |
| 4570 | 118.43 | 84.77 | 41.9  | 35.5  | 27.8  |
| 4572 | 118.36 | 84.77 | 41.94 | 35.55 | 27.84 |
| 4574 | 118.25 | 84.73 | 41.94 | 35.56 | 27.84 |
| 4576 | 118.14 | 84.69 | 41.95 | 35.57 | 27.85 |
| 4578 | 118.03 | 84.66 | 41.95 | 35.57 | 27.87 |
| 4580 | 117.91 | 84.6  | 41.93 | 35.55 | 27.87 |
| 4582 | 117.81 | 84.56 | 41.95 | 35.57 | 27.89 |
| 4584 | 117.63 | 84.48 | 41.9  | 35.52 | 27.85 |
| 4586 | 117.5  | 84.4  | 41.87 | 35.49 | 27.82 |
| 4588 | 117.41 | 84.38 | 41.9  | 35.52 | 27.87 |
| 4590 | 117.26 | 84.3  | 41.85 | 35.48 | 27.82 |
| 4592 | 117.13 | 84.26 | 41.86 | 35.49 | 27.85 |
| 4594 | 116.99 | 84.19 | 41.84 | 35.46 | 27.82 |
| 4596 | 116.91 | 84.16 | 41.85 | 35.48 | 27.85 |
| 4598 | 116.79 | 84.1  | 41.83 | 35.45 | 27.82 |
| 4600 | 116.63 | 84.03 | 41.8  | 35.43 | 27.8  |
| 4602 | 116.53 | 83.98 | 41.8  | 35.45 | 27.82 |
| 4604 | 116.41 | 83.92 | 41.78 | 35.42 | 27.8  |
| 4606 | 116.28 | 83.86 | 41.75 | 35.39 | 27.77 |
| 4608 | 116.14 | 83.8  | 41.73 | 35.38 | 27.77 |
| 4610 | 116.01 | 83.74 | 41.71 | 35.35 | 27.74 |
| 4612 | 115.93 | 83.72 | 41.73 | 35.38 | 27.77 |
| 4614 | 115.82 | 83.68 | 41.74 | 35.39 | 27.79 |
| 4616 | 115.64 | 83.6  | 41.69 | 35.34 | 27.75 |
| 4618 | 115.52 | 83.53 | 41.67 | 35.31 | 27.74 |
| 4620 | 115.39 | 83.46 | 41.64 | 35.28 | 27.72 |
| 4622 | 115.33 | 83.44 | 41.66 | 35.32 | 27.76 |
| 4624 | 115.15 | 83.37 | 41.62 | 35.27 | 27.71 |
| 4626 | 115.04 | 83.32 | 41.62 | 35.28 | 27.72 |
| 4628 | 114.92 | 83.26 | 41.59 | 35.24 | 27.7  |
| 4630 | 114.85 | 83.25 | 41.63 | 35.29 | 27.74 |
| 4632 | 114.71 | 83.19 | 41.61 | 35.27 | 27.72 |

|      |        |       |       |       |       |
|------|--------|-------|-------|-------|-------|
| 4634 | 114.6  | 83.13 | 41.61 | 35.27 | 27.73 |
| 4636 | 114.47 | 83.07 | 41.58 | 35.24 | 27.7  |
| 4638 | 114.33 | 83    | 41.54 | 35.21 | 27.67 |
| 4640 | 114.23 | 82.96 | 41.54 | 35.21 | 27.69 |
| 4642 | 114.12 | 82.92 | 41.55 | 35.21 | 27.68 |
| 4644 | 113.98 | 82.84 | 41.51 | 35.18 | 27.66 |
| 4646 | 113.88 | 82.81 | 41.52 | 35.19 | 27.67 |
| 4648 | 113.74 | 82.75 | 41.5  | 35.16 | 27.67 |
| 4650 | 113.63 | 82.7  | 41.49 | 35.17 | 27.68 |
| 4652 | 113.53 | 82.66 | 41.51 | 35.17 | 27.69 |
| 4654 | 113.4  | 82.6  | 41.48 | 35.15 | 27.66 |
| 4656 | 113.29 | 82.56 | 41.48 | 35.16 | 27.68 |
| 4658 | 113.18 | 82.51 | 41.47 | 35.15 | 27.67 |
| 4660 | 113.06 | 82.46 | 41.45 | 35.13 | 27.67 |
| 4662 | 112.95 | 82.4  | 41.45 | 35.13 | 27.66 |
| 4664 | 112.83 | 82.35 | 41.44 | 35.12 | 27.66 |
| 4666 | 112.71 | 82.29 | 41.43 | 35.11 | 27.65 |
| 4668 | 112.61 | 82.25 | 41.42 | 35.11 | 27.65 |
| 4670 | 112.5  | 82.19 | 41.4  | 35.1  | 27.64 |
| 4672 | 112.39 | 82.15 | 41.39 | 35.08 | 27.64 |
| 4674 | 112.26 | 82.08 | 41.38 | 35.07 | 27.63 |
| 4676 | 112.14 | 82.02 | 41.36 | 35.03 | 27.6  |
| 4678 | 111.99 | 81.93 | 41.31 | 35    | 27.56 |
| 4680 | 111.89 | 81.91 | 41.33 | 35.03 | 27.6  |
| 4682 | 111.74 | 81.82 | 41.28 | 34.98 | 27.57 |
| 4684 | 111.63 | 81.77 | 41.26 | 34.96 | 27.55 |
| 4686 | 111.56 | 81.75 | 41.28 | 34.98 | 27.58 |
| 4688 | 111.4  | 81.66 | 41.24 | 34.94 | 27.54 |
| 4690 | 111.27 | 81.6  | 41.22 | 34.92 | 27.52 |
| 4692 | 111.15 | 81.55 | 41.2  | 34.9  | 27.51 |
| 4694 | 111.09 | 81.55 | 41.24 | 34.94 | 27.56 |
| 4696 | 110.98 | 81.49 | 41.24 | 34.95 | 27.56 |
| 4698 | 110.82 | 81.4  | 41.17 | 34.88 | 27.51 |
| 4700 | 110.7  | 81.35 | 41.16 | 34.87 | 27.49 |
| 4702 | 110.58 | 81.29 | 41.14 | 34.85 | 27.47 |
| 4704 | 110.44 | 81.22 | 41.11 | 34.82 | 27.46 |
| 4706 | 110.36 | 81.19 | 41.12 | 34.83 | 27.47 |
| 4708 | 110.22 | 81.11 | 41.09 | 34.8  | 27.44 |
| 4710 | 110.09 | 81.05 | 41.07 | 34.79 | 27.43 |
| 4712 | 109.97 | 80.99 | 41.07 | 34.78 | 27.42 |
| 4714 | 109.89 | 80.97 | 41.07 | 34.78 | 27.44 |
| 4716 | 109.77 | 80.91 | 41.05 | 34.76 | 27.44 |
| 4718 | 109.67 | 80.86 | 41.04 | 34.76 | 27.44 |
| 4720 | 109.55 | 80.82 | 41.03 | 34.76 | 27.44 |

|      |        |       |       |       |       |
|------|--------|-------|-------|-------|-------|
| 4722 | 109.44 | 80.77 | 41.03 | 34.75 | 27.43 |
| 4724 | 109.35 | 80.73 | 41.03 | 34.75 | 27.44 |
| 4726 | 109.27 | 80.7  | 41.03 | 34.76 | 27.45 |
| 4728 | 109.15 | 80.66 | 41.03 | 34.77 | 27.46 |
| 4730 | 109.02 | 80.57 | 41    | 34.73 | 27.43 |
| 4732 | 108.92 | 80.53 | 40.99 | 34.72 | 27.43 |
| 4734 | 108.8  | 80.47 | 40.97 | 34.7  | 27.41 |
| 4736 | 108.7  | 80.47 | 41    | 34.74 | 27.45 |
| 4738 | 108.57 | 80.37 | 40.94 | 34.7  | 27.42 |
| 4740 | 108.45 | 80.32 | 40.95 | 34.69 | 27.41 |
| 4742 | 108.33 | 80.26 | 40.91 | 34.65 | 27.39 |
| 4744 | 108.26 | 80.25 | 40.95 | 34.69 | 27.44 |
| 4746 | 108.11 | 80.17 | 40.92 | 34.66 | 27.42 |
| 4748 | 107.98 | 80.09 | 40.88 | 34.62 | 27.37 |
| 4750 | 107.91 | 80.06 | 40.88 | 34.63 | 27.38 |
| 4752 | 107.77 | 80.01 | 40.87 | 34.61 | 27.37 |
| 4754 | 107.67 | 79.95 | 40.85 | 34.6  | 27.38 |
| 4756 | 107.58 | 79.92 | 40.86 | 34.61 | 27.39 |
| 4758 | 107.48 | 79.87 | 40.85 | 34.61 | 27.38 |
| 4760 | 107.38 | 79.84 | 40.85 | 34.62 | 27.38 |
| 4762 | 107.3  | 79.8  | 40.86 | 34.62 | 27.4  |
| 4764 | 107.16 | 79.71 | 40.82 | 34.58 | 27.37 |
| 4766 | 107.05 | 79.67 | 40.81 | 34.57 | 27.37 |
| 4768 | 106.92 | 79.6  | 40.79 | 34.55 | 27.34 |
| 4770 | 106.85 | 79.59 | 40.81 | 34.57 | 27.36 |
| 4772 | 106.74 | 79.54 | 40.79 | 34.56 | 27.36 |
| 4774 | 106.64 | 79.48 | 40.77 | 34.54 | 27.36 |
| 4776 | 106.53 | 79.43 | 40.76 | 34.52 | 27.35 |
| 4778 | 106.42 | 79.4  | 40.77 | 34.53 | 27.36 |
| 4780 | 106.32 | 79.35 | 40.76 | 34.52 | 27.35 |
| 4782 | 106.21 | 79.29 | 40.74 | 34.51 | 27.35 |
| 4784 | 106.09 | 79.24 | 40.73 | 34.49 | 27.35 |
| 4786 | 105.98 | 79.19 | 40.71 | 34.49 | 27.34 |
| 4788 | 105.91 | 79.17 | 40.73 | 34.5  | 27.35 |
| 4790 | 105.8  | 79.11 | 40.71 | 34.49 | 27.34 |
| 4792 | 105.66 | 79.04 | 40.69 | 34.47 | 27.32 |
| 4794 | 105.53 | 78.97 | 40.65 | 34.43 | 27.28 |
| 4796 | 105.43 | 78.92 | 40.64 | 34.43 | 27.29 |
| 4798 | 105.3  | 78.84 | 40.6  | 34.38 | 27.26 |
| 4800 | 105.17 | 78.77 | 40.58 | 34.37 | 27.24 |
| 4802 | 105.1  | 78.76 | 40.6  | 34.38 | 27.26 |
| 4804 | 104.99 | 78.7  | 40.59 | 34.36 | 27.26 |
| 4806 | 104.9  | 78.67 | 40.59 | 34.37 | 27.28 |
| 4808 | 104.81 | 78.63 | 40.58 | 34.37 | 27.28 |

|      |        |       |       |       |       |
|------|--------|-------|-------|-------|-------|
| 4810 | 104.69 | 78.55 | 40.55 | 34.34 | 27.26 |
| 4812 | 104.59 | 78.52 | 40.55 | 34.35 | 27.26 |
| 4814 | 104.49 | 78.48 | 40.55 | 34.34 | 27.27 |
| 4816 | 104.34 | 78.4  | 40.53 | 34.31 | 27.23 |
| 4818 | 104.26 | 78.37 | 40.52 | 34.31 | 27.23 |
| 4820 | 104.17 | 78.32 | 40.5  | 34.3  | 27.23 |
| 4822 | 104.08 | 78.28 | 40.51 | 34.31 | 27.24 |
| 4824 | 103.98 | 78.23 | 40.5  | 34.3  | 27.24 |
| 4826 | 103.84 | 78.16 | 40.47 | 34.28 | 27.23 |
| 4828 | 103.75 | 78.12 | 40.47 | 34.28 | 27.22 |
| 4830 | 103.65 | 78.08 | 40.46 | 34.27 | 27.21 |
| 4832 | 103.54 | 78.03 | 40.45 | 34.27 | 27.22 |
| 4834 | 103.45 | 77.97 | 40.44 | 34.25 | 27.22 |
| 4836 | 103.35 | 77.92 | 40.42 | 34.23 | 27.21 |
| 4838 | 103.25 | 77.87 | 40.41 | 34.22 | 27.21 |
| 4840 | 103.13 | 77.82 | 40.4  | 34.22 | 27.21 |
| 4842 | 103.03 | 77.75 | 40.37 | 34.19 | 27.19 |
| 4844 | 102.93 | 77.72 | 40.37 | 34.19 | 27.18 |
| 4846 | 102.83 | 77.67 | 40.36 | 34.18 | 27.18 |
| 4848 | 102.72 | 77.63 | 40.36 | 34.17 | 27.19 |
| 4850 | 102.63 | 77.58 | 40.34 | 34.17 | 27.18 |
| 4852 | 102.54 | 77.54 | 40.34 | 34.17 | 27.17 |
| 4854 | 102.43 | 77.49 | 40.33 | 34.17 | 27.17 |
| 4856 | 102.32 | 77.44 | 40.32 | 34.15 | 27.16 |
| 4858 | 102.19 | 77.36 | 40.28 | 34.11 | 27.12 |
| 4860 | 102.12 | 77.33 | 40.29 | 34.12 | 27.14 |
| 4862 | 102.03 | 77.3  | 40.28 | 34.12 | 27.15 |
| 4864 | 101.89 | 77.23 | 40.25 | 34.09 | 27.14 |
| 4866 | 101.81 | 77.19 | 40.26 | 34.09 | 27.14 |
| 4868 | 101.71 | 77.14 | 40.24 | 34.08 | 27.14 |
| 4870 | 101.61 | 77.09 | 40.23 | 34.07 | 27.14 |
| 4872 | 101.48 | 77.03 | 40.2  | 34.04 | 27.12 |
| 4874 | 101.39 | 76.99 | 40.2  | 34.04 | 27.12 |
| 4876 | 101.3  | 76.95 | 40.2  | 34.04 | 27.12 |
| 4878 | 101.21 | 76.91 | 40.19 | 34.03 | 27.12 |
| 4880 | 101.06 | 76.84 | 40.15 | 34    | 27.09 |
| 4882 | 100.96 | 76.77 | 40.11 | 33.97 | 27.05 |
| 4884 | 100.85 | 76.7  | 40.09 | 33.94 | 27.04 |
| 4886 | 100.76 | 76.65 | 40.08 | 33.92 | 27.05 |
| 4888 | 100.69 | 76.64 | 40.11 | 33.96 | 27.08 |
| 4890 | 100.62 | 76.62 | 40.12 | 33.98 | 27.09 |
| 4892 | 100.52 | 76.56 | 40.11 | 33.97 | 27.08 |
| 4894 | 100.45 | 76.53 | 40.11 | 33.97 | 27.08 |
| 4896 | 100.32 | 76.46 | 40.07 | 33.93 | 27.04 |

|      |        |       |       |       |       |
|------|--------|-------|-------|-------|-------|
| 4898 | 100.21 | 76.4  | 40.05 | 33.91 | 27.03 |
| 4900 | 100.09 | 76.32 | 40.02 | 33.87 | 27    |
| 4902 | 100.03 | 76.31 | 40.04 | 33.9  | 27.05 |
| 4904 | 99.95  | 76.29 | 40.05 | 33.91 | 27.06 |
| 4906 | 99.86  | 76.25 | 40.04 | 33.91 | 27.06 |
| 4908 | 99.76  | 76.2  | 40.03 | 33.91 | 27.05 |
| 4910 | 99.67  | 76.15 | 40.03 | 33.9  | 27.04 |
| 4912 | 99.54  | 76.1  | 39.99 | 33.85 | 27.01 |
| 4914 | 99.43  | 76.03 | 39.99 | 33.85 | 27.01 |
| 4916 | 99.34  | 75.98 | 39.96 | 33.82 | 26.99 |
| 4918 | 99.26  | 75.95 | 39.96 | 33.83 | 27.01 |
| 4920 | 99.15  | 75.92 | 39.96 | 33.83 | 27.01 |
| 4922 | 99.07  | 75.86 | 39.96 | 33.82 | 27.02 |
| 4924 | 98.97  | 75.8  | 39.94 | 33.81 | 27.01 |
| 4926 | 98.88  | 75.76 | 39.93 | 33.8  | 27.01 |
| 4928 | 98.77  | 75.71 | 39.93 | 33.8  | 27.01 |
| 4930 | 98.68  | 75.67 | 39.92 | 33.79 | 27.01 |
| 4932 | 98.59  | 75.6  | 39.89 | 33.77 | 26.99 |
| 4934 | 98.5   | 75.57 | 39.88 | 33.76 | 26.99 |
| 4936 | 98.4   | 75.52 | 39.89 | 33.76 | 27    |
| 4938 | 98.31  | 75.47 | 39.87 | 33.75 | 27    |
| 4940 | 98.22  | 75.43 | 39.86 | 33.75 | 26.99 |
| 4942 | 98.13  | 75.38 | 39.85 | 33.73 | 26.98 |
| 4944 | 98.04  | 75.33 | 39.84 | 33.72 | 26.98 |
| 4946 | 97.93  | 75.29 | 39.83 | 33.71 | 26.98 |
| 4948 | 97.84  | 75.24 | 39.81 | 33.7  | 26.96 |
| 4950 | 97.75  | 75.2  | 39.81 | 33.7  | 26.97 |
| 4952 | 97.66  | 75.16 | 39.81 | 33.7  | 26.97 |
| 4954 | 97.56  | 75.09 | 39.79 | 33.68 | 26.95 |
| 4956 | 97.47  | 75.05 | 39.78 | 33.67 | 26.95 |
| 4958 | 97.35  | 74.98 | 39.75 | 33.64 | 26.94 |
| 4960 | 97.27  | 74.96 | 39.76 | 33.64 | 26.94 |
| 4962 | 97.16  | 74.91 | 39.74 | 33.63 | 26.93 |
| 4964 | 97.06  | 74.83 | 39.71 | 33.59 | 26.9  |
| 4966 | 96.99  | 74.8  | 39.69 | 33.59 | 26.89 |
| 4968 | 96.89  | 74.77 | 39.71 | 33.61 | 26.9  |
| 4970 | 96.77  | 74.68 | 39.66 | 33.57 | 26.87 |
| 4972 | 96.71  | 74.67 | 39.68 | 33.6  | 26.9  |
| 4974 | 96.63  | 74.64 | 39.69 | 33.59 | 26.9  |
| 4976 | 96.51  | 74.57 | 39.64 | 33.56 | 26.88 |
| 4978 | 96.45  | 74.55 | 39.67 | 33.58 | 26.9  |
| 4980 | 96.35  | 74.49 | 39.64 | 33.54 | 26.87 |
| 4982 | 96.27  | 74.46 | 39.65 | 33.56 | 26.89 |
| 4984 | 96.16  | 74.41 | 39.65 | 33.55 | 26.89 |



|      |       |       |       |       |       |
|------|-------|-------|-------|-------|-------|
| 4986 | 96.07 | 74.36 | 39.63 | 33.53 | 26.89 |
| 4988 | 95.98 | 74.32 | 39.61 | 33.52 | 26.89 |
| 4990 | 95.9  | 74.27 | 39.6  | 33.52 | 26.88 |
| 4992 | 95.79 | 74.23 | 39.59 | 33.51 | 26.88 |
| 4994 | 95.69 | 74.17 | 39.57 | 33.49 | 26.86 |
| 4996 | 95.61 | 74.12 | 39.56 | 33.47 | 26.85 |
| 4998 | 95.54 | 74.09 | 39.56 | 33.48 | 26.86 |
| 5000 | 95.41 | 74.03 | 39.54 | 33.45 | 26.85 |
| 5002 | 95.32 | 73.97 | 39.52 | 33.45 | 26.85 |
| 5004 | 95.26 | 73.96 | 39.53 | 33.46 | 26.85 |
| 5006 | 95.21 | 73.94 | 39.55 | 33.48 | 26.86 |
| 5008 | 95.11 | 73.88 | 39.52 | 33.45 | 26.84 |
| 5010 | 95.01 | 73.83 | 39.51 | 33.44 | 26.84 |
| 5012 | 94.92 | 73.78 | 39.49 | 33.43 | 26.83 |
| 5014 | 94.85 | 73.76 | 39.52 | 33.45 | 26.86 |
| 5016 | 94.73 | 73.7  | 39.49 | 33.43 | 26.84 |
| 5018 | 94.67 | 73.66 | 39.5  | 33.45 | 26.86 |
| 5020 | 94.55 | 73.6  | 39.46 | 33.4  | 26.82 |
| 5022 | 94.46 | 73.55 | 39.44 | 33.38 | 26.81 |
| 5024 | 94.36 | 73.5  | 39.43 | 33.37 | 26.81 |
| 5026 | 94.3  | 73.47 | 39.45 | 33.38 | 26.83 |
| 5028 | 94.19 | 73.41 | 39.42 | 33.36 | 26.8  |
| 5030 | 94.1  | 73.36 | 39.4  | 33.34 | 26.79 |
| 5032 | 94    | 73.32 | 39.39 | 33.34 | 26.79 |
| 5034 | 93.91 | 73.27 | 39.39 | 33.33 | 26.78 |
| 5036 | 93.82 | 73.21 | 39.37 | 33.3  | 26.77 |
| 5038 | 93.74 | 73.17 | 39.36 | 33.31 | 26.77 |
| 5040 | 93.64 | 73.12 | 39.35 | 33.29 | 26.77 |
| 5042 | 93.51 | 73.05 | 39.3  | 33.25 | 26.74 |
| 5044 | 93.46 | 73.02 | 39.3  | 33.24 | 26.73 |
| 5046 | 93.36 | 72.98 | 39.3  | 33.24 | 26.73 |
| 5048 | 93.24 | 72.88 | 39.25 | 33.19 | 26.7  |
| 5050 | 93.16 | 72.85 | 39.24 | 33.19 | 26.7  |
| 5052 | 93.11 | 72.84 | 39.27 | 33.21 | 26.73 |
| 5054 | 93    | 72.77 | 39.23 | 33.18 | 26.69 |
| 5056 | 92.91 | 72.73 | 39.23 | 33.18 | 26.7  |
| 5058 | 92.83 | 72.68 | 39.22 | 33.18 | 26.69 |
| 5060 | 92.74 | 72.64 | 39.2  | 33.18 | 26.69 |
| 5062 | 92.68 | 72.61 | 39.21 | 33.17 | 26.7  |
| 5064 | 92.57 | 72.55 | 39.19 | 33.15 | 26.68 |
| 5066 | 92.49 | 72.52 | 39.19 | 33.17 | 26.7  |
| 5068 | 92.38 | 72.45 | 39.15 | 33.12 | 26.66 |
| 5070 | 92.3  | 72.41 | 39.14 | 33.11 | 26.65 |
| 5072 | 92.19 | 72.37 | 39.12 | 33.09 | 26.64 |

|      |       |       |       |       |       |
|------|-------|-------|-------|-------|-------|
| 5074 | 92.11 | 72.3  | 39.11 | 33.08 | 26.63 |
| 5076 | 92.03 | 72.27 | 39.12 | 33.08 | 26.63 |
| 5078 | 91.94 | 72.23 | 39.1  | 33.06 | 26.63 |
| 5080 | 91.87 | 72.2  | 39.11 | 33.08 | 26.64 |
| 5082 | 91.79 | 72.16 | 39.11 | 33.08 | 26.64 |
| 5084 | 91.74 | 72.16 | 39.13 | 33.1  | 26.68 |
| 5086 | 91.67 | 72.11 | 39.12 | 33.09 | 26.68 |
| 5088 | 91.57 | 72.05 | 39.08 | 33.06 | 26.66 |
| 5090 | 91.47 | 72    | 39.08 | 33.06 | 26.66 |
| 5092 | 91.41 | 71.98 | 39.1  | 33.08 | 26.67 |
| 5094 | 91.34 | 71.94 | 39.09 | 33.07 | 26.67 |
| 5096 | 91.23 | 71.88 | 39.06 | 33.04 | 26.64 |
| 5098 | 91.1  | 71.8  | 39.02 | 33.01 | 26.6  |
| 5100 | 91.06 | 71.8  | 39.04 | 33.02 | 26.63 |
| 5102 | 91    | 71.77 | 39.05 | 33.04 | 26.65 |
| 5104 | 90.92 | 71.72 | 39.03 | 33.03 | 26.63 |
| 5106 | 90.83 | 71.68 | 39.03 | 33.02 | 26.64 |
| 5108 | 90.73 | 71.62 | 38.99 | 32.99 | 26.62 |
| 5110 | 90.64 | 71.57 | 38.99 | 32.97 | 26.62 |
| 5112 | 90.55 | 71.55 | 39    | 32.99 | 26.63 |
| 5114 | 90.49 | 71.5  | 38.99 | 32.99 | 26.64 |
| 5116 | 90.39 | 71.45 | 38.97 | 32.97 | 26.62 |
| 5118 | 90.32 | 71.43 | 38.98 | 32.97 | 26.63 |
| 5120 | 90.23 | 71.38 | 38.97 | 32.96 | 26.62 |
| 5122 | 90.19 | 71.38 | 39    | 33    | 26.67 |
| 5124 | 90.1  | 71.32 | 38.97 | 32.98 | 26.64 |
| 5126 | 90    | 71.26 | 38.96 | 32.97 | 26.63 |
| 5128 | 89.87 | 71.18 | 38.91 | 32.93 | 26.6  |
| 5130 | 89.81 | 71.15 | 38.91 | 32.92 | 26.59 |
| 5132 | 89.75 | 71.12 | 38.92 | 32.94 | 26.62 |
| 5134 | 89.67 | 71.08 | 38.9  | 32.91 | 26.6  |
| 5136 | 89.58 | 71.02 | 38.89 | 32.91 | 26.59 |
| 5138 | 89.53 | 71    | 38.91 | 32.92 | 26.62 |
| 5140 | 89.41 | 70.94 | 38.87 | 32.88 | 26.59 |
| 5142 | 89.33 | 70.9  | 38.86 | 32.87 | 26.58 |
| 5144 | 89.24 | 70.85 | 38.84 | 32.86 | 26.57 |
| 5146 | 89.16 | 70.8  | 38.84 | 32.86 | 26.57 |
| 5148 | 89.09 | 70.77 | 38.83 | 32.85 | 26.57 |
| 5150 | 89.01 | 70.73 | 38.82 | 32.84 | 26.57 |
| 5152 | 88.87 | 70.65 | 38.76 | 32.78 | 26.51 |
| 5154 | 88.83 | 70.63 | 38.79 | 32.82 | 26.55 |
| 5156 | 88.78 | 70.6  | 38.8  | 32.83 | 26.57 |
| 5158 | 88.71 | 70.58 | 38.81 | 32.82 | 26.58 |
| 5160 | 88.62 | 70.54 | 38.79 | 32.81 | 26.57 |

|      |       |       |       |       |       |
|------|-------|-------|-------|-------|-------|
| 5162 | 88.54 | 70.49 | 38.78 | 32.81 | 26.55 |
| 5164 | 88.45 | 70.44 | 38.76 | 32.8  | 26.55 |
| 5166 | 88.36 | 70.39 | 38.74 | 32.77 | 26.54 |
| 5168 | 88.29 | 70.35 | 38.73 | 32.76 | 26.54 |
| 5170 | 88.2  | 70.3  | 38.72 | 32.76 | 26.53 |
| 5172 | 88.11 | 70.26 | 38.71 | 32.75 | 26.53 |
| 5174 | 88.04 | 70.24 | 38.71 | 32.75 | 26.52 |
| 5176 | 87.96 | 70.19 | 38.71 | 32.76 | 26.53 |
| 5178 | 87.9  | 70.16 | 38.71 | 32.75 | 26.53 |
| 5180 | 87.82 | 70.12 | 38.69 | 32.74 | 26.53 |
| 5182 | 87.74 | 70.08 | 38.69 | 32.74 | 26.54 |
| 5184 | 87.64 | 70.03 | 38.67 | 32.72 | 26.52 |
| 5186 | 87.58 | 70    | 38.67 | 32.72 | 26.52 |
| 5188 | 87.52 | 69.98 | 38.68 | 32.74 | 26.53 |
| 5190 | 87.44 | 69.93 | 38.66 | 32.72 | 26.52 |
| 5192 | 87.33 | 69.85 | 38.63 | 32.68 | 26.49 |
| 5194 | 87.25 | 69.81 | 38.63 | 32.68 | 26.49 |
| 5196 | 87.18 | 69.78 | 38.63 | 32.7  | 26.51 |
| 5198 | 87.13 | 69.74 | 38.61 | 32.67 | 26.5  |
| 5200 | 87.01 | 69.67 | 38.59 | 32.64 | 26.48 |
| 5202 | 86.91 | 69.61 | 38.53 | 32.6  | 26.44 |
| 5204 | 86.85 | 69.59 | 38.55 | 32.62 | 26.46 |
| 5206 | 86.79 | 69.56 | 38.55 | 32.63 | 26.47 |
| 5208 | 86.68 | 69.5  | 38.54 | 32.62 | 26.45 |
| 5210 | 86.62 | 69.46 | 38.54 | 32.61 | 26.44 |
| 5212 | 86.55 | 69.44 | 38.53 | 32.61 | 26.45 |
| 5214 | 86.47 | 69.38 | 38.52 | 32.59 | 26.43 |
| 5216 | 86.39 | 69.34 | 38.5  | 32.58 | 26.43 |
| 5218 | 86.32 | 69.31 | 38.5  | 32.59 | 26.44 |
| 5220 | 86.2  | 69.24 | 38.47 | 32.55 | 26.4  |
| 5222 | 86.14 | 69.21 | 38.47 | 32.54 | 26.42 |
| 5224 | 86.06 | 69.17 | 38.47 | 32.55 | 26.43 |
| 5226 | 85.97 | 69.12 | 38.44 | 32.52 | 26.42 |
| 5228 | 85.92 | 69.09 | 38.45 | 32.53 | 26.42 |
| 5230 | 85.87 | 69.07 | 38.47 | 32.56 | 26.46 |
| 5232 | 85.8  | 69.05 | 38.48 | 32.55 | 26.44 |
| 5234 | 85.72 | 69    | 38.44 | 32.53 | 26.43 |
| 5236 | 85.63 | 68.96 | 38.44 | 32.53 | 26.44 |
| 5238 | 85.55 | 68.91 | 38.42 | 32.52 | 26.43 |
| 5240 | 85.49 | 68.89 | 38.44 | 32.53 | 26.43 |
| 5242 | 85.42 | 68.86 | 38.43 | 32.53 | 26.43 |
| 5244 | 85.33 | 68.8  | 38.4  | 32.5  | 26.41 |
| 5246 | 85.25 | 68.74 | 38.38 | 32.48 | 26.39 |
| 5248 | 85.18 | 68.7  | 38.37 | 32.47 | 26.39 |

|      |       |       |       |       |       |
|------|-------|-------|-------|-------|-------|
| 5250 | 85.1  | 68.66 | 38.36 | 32.47 | 26.39 |
| 5252 | 85.02 | 68.61 | 38.34 | 32.45 | 26.36 |
| 5254 | 84.92 | 68.55 | 38.31 | 32.41 | 26.34 |
| 5256 | 84.86 | 68.53 | 38.33 | 32.43 | 26.36 |
| 5258 | 84.81 | 68.51 | 38.35 | 32.47 | 26.41 |
| 5260 | 84.76 | 68.48 | 38.33 | 32.45 | 26.4  |
| 5262 | 84.66 | 68.43 | 38.32 | 32.44 | 26.38 |
| 5264 | 84.59 | 68.41 | 38.33 | 32.44 | 26.39 |
| 5266 | 84.49 | 68.34 | 38.29 | 32.41 | 26.37 |
| 5268 | 84.46 | 68.34 | 38.32 | 32.44 | 26.39 |
| 5270 | 84.36 | 68.27 | 38.29 | 32.42 | 26.37 |
| 5272 | 84.26 | 68.22 | 38.26 | 32.39 | 26.34 |
| 5274 | 84.18 | 68.17 | 38.25 | 32.38 | 26.35 |
| 5276 | 84.1  | 68.13 | 38.24 | 32.36 | 26.34 |
| 5278 | 84    | 68.08 | 38.21 | 32.33 | 26.32 |
| 5280 | 83.94 | 68.05 | 38.21 | 32.33 | 26.33 |
| 5282 | 83.87 | 68.01 | 38.21 | 32.33 | 26.33 |
| 5284 | 83.81 | 67.97 | 38.2  | 32.33 | 26.33 |
| 5286 | 83.74 | 67.93 | 38.19 | 32.32 | 26.33 |
| 5288 | 83.66 | 67.89 | 38.19 | 32.31 | 26.33 |
| 5290 | 83.59 | 67.85 | 38.18 | 32.3  | 26.32 |
| 5292 | 83.52 | 67.83 | 38.19 | 32.32 | 26.33 |
| 5294 | 83.45 | 67.77 | 38.16 | 32.29 | 26.32 |
| 5296 | 83.38 | 67.73 | 38.15 | 32.29 | 26.31 |
| 5298 | 83.31 | 67.7  | 38.15 | 32.28 | 26.31 |
| 5300 | 83.24 | 67.67 | 38.14 | 32.29 | 26.3  |
| 5302 | 83.17 | 67.63 | 38.14 | 32.28 | 26.3  |
| 5304 | 83.09 | 67.59 | 38.12 | 32.27 | 26.29 |
| 5306 | 83.02 | 67.54 | 38.12 | 32.27 | 26.29 |
| 5308 | 82.93 | 67.48 | 38.08 | 32.24 | 26.26 |
| 5310 | 82.89 | 67.46 | 38.1  | 32.25 | 26.28 |
| 5312 | 82.8  | 67.42 | 38.09 | 32.24 | 26.28 |
| 5314 | 82.72 | 67.38 | 38.08 | 32.24 | 26.28 |
| 5316 | 82.66 | 67.35 | 38.07 | 32.23 | 26.28 |
| 5318 | 82.59 | 67.31 | 38.07 | 32.22 | 26.28 |
| 5320 | 82.48 | 67.24 | 38.02 | 32.19 | 26.24 |
| 5322 | 82.44 | 67.22 | 38.04 | 32.21 | 26.27 |
| 5324 | 82.38 | 67.19 | 38.04 | 32.2  | 26.27 |
| 5326 | 82.3  | 67.15 | 38.03 | 32.2  | 26.26 |
| 5328 | 82.21 | 67.09 | 38.02 | 32.18 | 26.25 |
| 5330 | 82.15 | 67.07 | 38.01 | 32.17 | 26.25 |
| 5332 | 82.07 | 67.01 | 37.99 | 32.17 | 26.24 |
| 5334 | 82.02 | 66.99 | 38    | 32.17 | 26.25 |
| 5336 | 81.93 | 66.94 | 37.97 | 32.16 | 26.24 |

|      |       |       |       |       |       |
|------|-------|-------|-------|-------|-------|
| 5338 | 81.84 | 66.87 | 37.93 | 32.12 | 26.2  |
| 5340 | 81.8  | 66.88 | 37.96 | 32.14 | 26.22 |
| 5342 | 81.71 | 66.82 | 37.94 | 32.12 | 26.22 |
| 5344 | 81.67 | 66.8  | 37.96 | 32.13 | 26.24 |
| 5346 | 81.57 | 66.75 | 37.94 | 32.12 | 26.21 |
| 5348 | 81.52 | 66.73 | 37.94 | 32.12 | 26.21 |
| 5350 | 81.44 | 66.67 | 37.91 | 32.1  | 26.2  |
| 5352 | 81.38 | 66.65 | 37.92 | 32.11 | 26.22 |
| 5354 | 81.28 | 66.58 | 37.9  | 32.08 | 26.21 |
| 5356 | 81.23 | 66.56 | 37.89 | 32.08 | 26.21 |
| 5358 | 81.17 | 66.53 | 37.89 | 32.07 | 26.21 |
| 5360 | 81.09 | 66.5  | 37.88 | 32.06 | 26.21 |
| 5362 | 81.03 | 66.45 | 37.87 | 32.07 | 26.21 |
| 5364 | 80.99 | 66.44 | 37.88 | 32.09 | 26.23 |
| 5366 | 80.9  | 66.39 | 37.86 | 32.06 | 26.21 |
| 5368 | 80.86 | 66.38 | 37.9  | 32.08 | 26.23 |
| 5370 | 80.78 | 66.34 | 37.87 | 32.07 | 26.23 |
| 5372 | 80.7  | 66.28 | 37.84 | 32.05 | 26.2  |
| 5374 | 80.66 | 66.27 | 37.86 | 32.07 | 26.21 |
| 5376 | 80.57 | 66.23 | 37.84 | 32.04 | 26.2  |
| 5378 | 80.48 | 66.16 | 37.82 | 32.02 | 26.19 |
| 5380 | 80.43 | 66.14 | 37.82 | 32.02 | 26.19 |
| 5382 | 80.35 | 66.1  | 37.82 | 32.01 | 26.18 |
| 5384 | 80.27 | 66.05 | 37.8  | 32    | 26.17 |
| 5386 | 80.2  | 66.01 | 37.79 | 31.99 | 26.17 |
| 5388 | 80.15 | 65.99 | 37.8  | 32    | 26.18 |
| 5390 | 80.07 | 65.94 | 37.77 | 31.98 | 26.17 |
| 5392 | 80    | 65.93 | 37.78 | 31.99 | 26.18 |
| 5394 | 79.94 | 65.87 | 37.76 | 31.97 | 26.17 |
| 5396 | 79.89 | 65.85 | 37.77 | 32    | 26.21 |
| 5398 | 79.85 | 65.84 | 37.79 | 32.01 | 26.21 |
| 5400 | 79.76 | 65.79 | 37.76 | 31.98 | 26.2  |
| 5402 | 79.69 | 65.74 | 37.75 | 31.97 | 26.2  |
| 5404 | 79.61 | 65.68 | 37.72 | 31.95 | 26.16 |
| 5406 | 79.53 | 65.64 | 37.71 | 31.94 | 26.17 |
| 5408 | 79.49 | 65.64 | 37.74 | 31.96 | 26.18 |
| 5410 | 79.44 | 65.61 | 37.74 | 31.96 | 26.2  |
| 5412 | 79.38 | 65.57 | 37.73 | 31.96 | 26.2  |
| 5414 | 79.28 | 65.5  | 37.68 | 31.92 | 26.16 |
| 5416 | 79.23 | 65.49 | 37.7  | 31.93 | 26.18 |
| 5418 | 79.16 | 65.45 | 37.7  | 31.93 | 26.17 |
| 5420 | 79.1  | 65.4  | 37.68 | 31.92 | 26.17 |
| 5422 | 79.05 | 65.39 | 37.68 | 31.92 | 26.18 |
| 5424 | 78.95 | 65.33 | 37.66 | 31.89 | 26.16 |

|      |       |       |       |       |       |
|------|-------|-------|-------|-------|-------|
| 5426 | 78.91 | 65.3  | 37.67 | 31.91 | 26.17 |
| 5428 | 78.85 | 65.28 | 37.66 | 31.91 | 26.16 |
| 5430 | 78.78 | 65.24 | 37.65 | 31.9  | 26.16 |
| 5432 | 78.69 | 65.18 | 37.65 | 31.88 | 26.15 |
| 5434 | 78.6  | 65.13 | 37.61 | 31.85 | 26.13 |
| 5436 | 78.52 | 65.07 | 37.58 | 31.83 | 26.12 |
| 5438 | 78.47 | 65.04 | 37.59 | 31.83 | 26.12 |
| 5440 | 78.41 | 65    | 37.59 | 31.84 | 26.13 |
| 5442 | 78.36 | 65    | 37.59 | 31.85 | 26.13 |
| 5444 | 78.3  | 64.96 | 37.58 | 31.83 | 26.12 |
| 5446 | 78.21 | 64.92 | 37.57 | 31.82 | 26.11 |
| 5448 | 78.14 | 64.88 | 37.55 | 31.82 | 26.12 |
| 5450 | 78.07 | 64.83 | 37.55 | 31.81 | 26.12 |
| 5452 | 77.97 | 64.76 | 37.5  | 31.76 | 26.07 |
| 5454 | 77.93 | 64.75 | 37.5  | 31.76 | 26.08 |
| 5456 | 77.83 | 64.68 | 37.46 | 31.73 | 26.04 |
| 5458 | 77.78 | 64.66 | 37.47 | 31.74 | 26.05 |
| 5460 | 77.73 | 64.63 | 37.47 | 31.75 | 26.07 |
| 5462 | 77.67 | 64.59 | 37.46 | 31.74 | 26.05 |
| 5464 | 77.59 | 64.56 | 37.45 | 31.73 | 26.04 |
| 5466 | 77.55 | 64.54 | 37.47 | 31.75 | 26.06 |
| 5468 | 77.48 | 64.49 | 37.45 | 31.73 | 26.05 |
| 5470 | 77.41 | 64.45 | 37.43 | 31.72 | 26.04 |
| 5472 | 77.34 | 64.42 | 37.42 | 31.71 | 26.03 |
| 5474 | 77.29 | 64.39 | 37.42 | 31.71 | 26.04 |
| 5476 | 77.23 | 64.35 | 37.41 | 31.7  | 26.05 |
| 5478 | 77.2  | 64.35 | 37.45 | 31.74 | 26.09 |
| 5480 | 77.12 | 64.3  | 37.44 | 31.72 | 26.06 |
| 5482 | 77.05 | 64.26 | 37.41 | 31.69 | 26.05 |
| 5484 | 76.96 | 64.2  | 37.39 | 31.68 | 26.03 |
| 5486 | 76.91 | 64.19 | 37.38 | 31.67 | 26.03 |
| 5488 | 76.86 | 64.16 | 37.39 | 31.67 | 26.04 |
| 5490 | 76.8  | 64.14 | 37.41 | 31.71 | 26.07 |
| 5492 | 76.73 | 64.09 | 37.37 | 31.67 | 26.04 |
| 5494 | 76.67 | 64.05 | 37.36 | 31.65 | 26.04 |
| 5496 | 76.58 | 64    | 37.34 | 31.64 | 26.01 |
| 5498 | 76.52 | 63.96 | 37.34 | 31.64 | 26.02 |
| 5500 | 76.45 | 63.92 | 37.32 | 31.62 | 26    |
| 5502 | 76.36 | 63.86 | 37.27 | 31.58 | 25.97 |
| 5504 | 76.3  | 63.83 | 37.28 | 31.59 | 25.98 |
| 5506 | 76.25 | 63.79 | 37.28 | 31.58 | 25.98 |
| 5508 | 76.19 | 63.76 | 37.28 | 31.59 | 25.98 |
| 5510 | 76.14 | 63.74 | 37.28 | 31.59 | 25.99 |
| 5512 | 76.06 | 63.7  | 37.26 | 31.57 | 25.97 |

|      |       |       |       |       |       |
|------|-------|-------|-------|-------|-------|
| 5514 | 75.99 | 63.63 | 37.22 | 31.55 | 25.96 |
| 5516 | 75.95 | 63.62 | 37.24 | 31.56 | 25.97 |
| 5518 | 75.93 | 63.61 | 37.26 | 31.58 | 25.99 |
| 5520 | 75.86 | 63.59 | 37.26 | 31.59 | 26    |
| 5522 | 75.79 | 63.55 | 37.25 | 31.58 | 26    |
| 5524 | 75.71 | 63.5  | 37.23 | 31.56 | 25.97 |
| 5526 | 75.67 | 63.48 | 37.25 | 31.57 | 25.99 |
| 5528 | 75.57 | 63.41 | 37.21 | 31.53 | 25.96 |
| 5530 | 75.51 | 63.38 | 37.2  | 31.53 | 25.95 |
| 5532 | 75.46 | 63.36 | 37.19 | 31.53 | 25.96 |
| 5534 | 75.4  | 63.33 | 37.19 | 31.51 | 25.96 |
| 5536 | 75.34 | 63.3  | 37.2  | 31.54 | 25.98 |
| 5538 | 75.26 | 63.23 | 37.16 | 31.49 | 25.94 |
| 5540 | 75.22 | 63.21 | 37.16 | 31.49 | 25.96 |
| 5542 | 75.14 | 63.16 | 37.15 | 31.48 | 25.94 |
| 5544 | 75.08 | 63.15 | 37.17 | 31.49 | 25.96 |
| 5546 | 75.02 | 63.11 | 37.15 | 31.47 | 25.95 |
| 5548 | 74.95 | 63.06 | 37.12 | 31.47 | 25.92 |
| 5550 | 74.9  | 63.03 | 37.11 | 31.47 | 25.92 |
| 5552 | 74.88 | 63.05 | 37.17 | 31.52 | 25.97 |
| 5554 | 74.81 | 63    | 37.15 | 31.5  | 25.96 |
| 5556 | 74.73 | 62.95 | 37.12 | 31.46 | 25.93 |
| 5558 | 74.67 | 62.91 | 37.11 | 31.45 | 25.92 |
| 5560 | 74.61 | 62.88 | 37.1  | 31.46 | 25.93 |
| 5562 | 74.54 | 62.84 | 37.1  | 31.46 | 25.92 |
| 5564 | 74.44 | 62.77 | 37.06 | 31.41 | 25.9  |
| 5566 | 74.38 | 62.73 | 37.04 | 31.39 | 25.89 |
| 5568 | 74.28 | 62.66 | 36.99 | 31.36 | 25.85 |
| 5570 | 74.27 | 62.66 | 37.03 | 31.39 | 25.89 |
| 5572 | 74.21 | 62.64 | 37.02 | 31.38 | 25.87 |
| 5574 | 74.15 | 62.6  | 37.01 | 31.38 | 25.88 |
| 5576 | 74.1  | 62.58 | 37.01 | 31.38 | 25.89 |
| 5578 | 74.07 | 62.57 | 37.04 | 31.4  | 25.91 |
| 5580 | 74.01 | 62.52 | 37.01 | 31.38 | 25.88 |
| 5582 | 73.94 | 62.48 | 37    | 31.37 | 25.88 |
| 5584 | 73.87 | 62.45 | 36.99 | 31.37 | 25.87 |
| 5586 | 73.8  | 62.4  | 36.97 | 31.34 | 25.85 |
| 5588 | 73.76 | 62.38 | 36.97 | 31.35 | 25.86 |
| 5590 | 73.67 | 62.32 | 36.93 | 31.31 | 25.83 |
| 5592 | 73.61 | 62.29 | 36.95 | 31.32 | 25.84 |
| 5594 | 73.56 | 62.27 | 36.95 | 31.33 | 25.86 |
| 5596 | 73.5  | 62.24 | 36.95 | 31.33 | 25.86 |
| 5598 | 73.45 | 62.21 | 36.93 | 31.31 | 25.87 |
| 5600 | 73.39 | 62.18 | 36.92 | 31.31 | 25.85 |

|      |       |       |       |       |       |
|------|-------|-------|-------|-------|-------|
| 5602 | 73.34 | 62.15 | 36.93 | 31.32 | 25.87 |
| 5604 | 73.26 | 62.11 | 36.9  | 31.29 | 25.85 |
| 5606 | 73.21 | 62.07 | 36.9  | 31.28 | 25.84 |
| 5608 | 73.14 | 62.03 | 36.89 | 31.28 | 25.84 |
| 5610 | 73.08 | 62    | 36.88 | 31.27 | 25.83 |
| 5612 | 73.02 | 61.97 | 36.87 | 31.27 | 25.83 |
| 5614 | 72.98 | 61.94 | 36.87 | 31.27 | 25.83 |
| 5616 | 72.89 | 61.88 | 36.85 | 31.24 | 25.8  |
| 5618 | 72.84 | 61.86 | 36.85 | 31.24 | 25.81 |
| 5620 | 72.8  | 61.84 | 36.85 | 31.25 | 25.82 |
| 5622 | 72.77 | 61.83 | 36.87 | 31.28 | 25.85 |
| 5624 | 72.66 | 61.75 | 36.82 | 31.22 | 25.79 |
| 5626 | 72.6  | 61.72 | 36.81 | 31.22 | 25.79 |
| 5628 | 72.58 | 61.71 | 36.83 | 31.24 | 25.8  |
| 5630 | 72.53 | 61.69 | 36.82 | 31.23 | 25.83 |
| 5632 | 72.45 | 61.64 | 36.8  | 31.23 | 25.82 |
| 5634 | 72.38 | 61.6  | 36.79 | 31.21 | 25.8  |
| 5636 | 72.32 | 61.56 | 36.78 | 31.19 | 25.8  |
| 5638 | 72.27 | 61.52 | 36.77 | 31.19 | 25.8  |
| 5640 | 72.18 | 61.46 | 36.74 | 31.16 | 25.78 |
| 5642 | 72.11 | 61.41 | 36.7  | 31.12 | 25.74 |
| 5644 | 72.08 | 61.39 | 36.71 | 31.13 | 25.76 |
| 5646 | 72.02 | 61.36 | 36.71 | 31.13 | 25.77 |
| 5648 | 71.97 | 61.34 | 36.7  | 31.12 | 25.75 |
| 5650 | 71.92 | 61.31 | 36.71 | 31.12 | 25.75 |
| 5652 | 71.84 | 61.26 | 36.69 | 31.11 | 25.74 |
| 5654 | 71.81 | 61.25 | 36.7  | 31.13 | 25.76 |
| 5656 | 71.77 | 61.23 | 36.7  | 31.13 | 25.78 |
| 5658 | 71.73 | 61.22 | 36.73 | 31.17 | 25.8  |
| 5660 | 71.67 | 61.19 | 36.72 | 31.16 | 25.8  |
| 5662 | 71.6  | 61.13 | 36.69 | 31.12 | 25.77 |
| 5664 | 71.51 | 61.08 | 36.66 | 31.1  | 25.75 |
| 5666 | 71.45 | 61.03 | 36.63 | 31.09 | 25.73 |
| 5668 | 71.37 | 60.98 | 36.61 | 31.04 | 25.69 |
| 5670 | 71.34 | 60.97 | 36.63 | 31.06 | 25.73 |
| 5672 | 71.24 | 60.9  | 36.59 | 31.03 | 25.69 |
| 5674 | 71.19 | 60.86 | 36.57 | 31.01 | 25.68 |
| 5676 | 71.13 | 60.83 | 36.56 | 31.01 | 25.68 |
| 5678 | 71.08 | 60.81 | 36.56 | 31.01 | 25.67 |
| 5680 | 71.03 | 60.78 | 36.56 | 31.02 | 25.67 |
| 5682 | 70.97 | 60.74 | 36.55 | 31.01 | 25.67 |
| 5684 | 70.92 | 60.72 | 36.54 | 31.01 | 25.68 |
| 5686 | 70.89 | 60.71 | 36.55 | 31    | 25.68 |
| 5688 | 70.81 | 60.64 | 36.52 | 30.98 | 25.66 |



|      |       |       |       |       |       |
|------|-------|-------|-------|-------|-------|
| 5690 | 70.76 | 60.62 | 36.53 | 30.99 | 25.67 |
| 5692 | 70.7  | 60.59 | 36.52 | 30.98 | 25.66 |
| 5694 | 70.65 | 60.56 | 36.51 | 30.97 | 25.66 |
| 5696 | 70.59 | 60.52 | 36.5  | 30.96 | 25.65 |
| 5698 | 70.54 | 60.49 | 36.49 | 30.96 | 25.65 |
| 5700 | 70.49 | 60.46 | 36.49 | 30.95 | 25.65 |
| 5702 | 70.44 | 60.43 | 36.48 | 30.95 | 25.65 |
| 5704 | 70.4  | 60.42 | 36.49 | 30.96 | 25.65 |
| 5706 | 70.35 | 60.39 | 36.48 | 30.95 | 25.66 |
| 5708 | 70.3  | 60.37 | 36.5  | 30.97 | 25.68 |
| 5710 | 70.25 | 60.34 | 36.5  | 30.96 | 25.67 |
| 5712 | 70.18 | 60.3  | 36.47 | 30.95 | 25.66 |
| 5714 | 70.15 | 60.28 | 36.47 | 30.97 | 25.68 |
| 5716 | 70.12 | 60.27 | 36.49 | 30.97 | 25.69 |
| 5718 | 70.05 | 60.23 | 36.48 | 30.97 | 25.67 |
| 5720 | 69.94 | 60.15 | 36.43 | 30.91 | 25.63 |
| 5722 | 69.92 | 60.15 | 36.44 | 30.92 | 25.64 |
| 5724 | 69.87 | 60.12 | 36.44 | 30.93 | 25.65 |
| 5726 | 69.79 | 60.07 | 36.41 | 30.9  | 25.63 |
| 5728 | 69.77 | 60.08 | 36.44 | 30.92 | 25.66 |
| 5730 | 69.68 | 60.01 | 36.39 | 30.88 | 25.62 |
| 5732 | 69.61 | 59.96 | 36.37 | 30.87 | 25.61 |
| 5734 | 69.56 | 59.94 | 36.37 | 30.87 | 25.63 |
| 5736 | 69.54 | 59.94 | 36.41 | 30.9  | 25.66 |
| 5738 | 69.48 | 59.9  | 36.39 | 30.88 | 25.66 |
| 5740 | 69.4  | 59.84 | 36.36 | 30.86 | 25.61 |
| 5742 | 69.33 | 59.8  | 36.34 | 30.84 | 25.6  |
| 5744 | 69.27 | 59.77 | 36.33 | 30.83 | 25.6  |
| 5746 | 69.22 | 59.73 | 36.33 | 30.83 | 25.59 |
| 5748 | 69.2  | 59.74 | 36.36 | 30.86 | 25.63 |
| 5750 | 69.15 | 59.69 | 36.34 | 30.84 | 25.61 |
| 5752 | 69.08 | 59.65 | 36.31 | 30.82 | 25.6  |
| 5754 | 69.06 | 59.66 | 36.35 | 30.86 | 25.64 |
| 5756 | 68.95 | 59.58 | 36.29 | 30.8  | 25.58 |
| 5758 | 68.94 | 59.59 | 36.33 | 30.84 | 25.63 |
| 5760 | 68.87 | 59.56 | 36.32 | 30.83 | 25.63 |
| 5762 | 68.84 | 59.53 | 36.32 | 30.84 | 25.63 |
| 5764 | 68.77 | 59.48 | 36.31 | 30.83 | 25.62 |
| 5766 | 68.71 | 59.45 | 36.28 | 30.8  | 25.58 |
| 5768 | 68.64 | 59.42 | 36.28 | 30.81 | 25.59 |
| 5770 | 68.58 | 59.36 | 36.24 | 30.78 | 25.57 |
| 5772 | 68.53 | 59.33 | 36.24 | 30.77 | 25.56 |
| 5774 | 68.51 | 59.34 | 36.26 | 30.79 | 25.59 |
| 5776 | 68.47 | 59.33 | 36.28 | 30.81 | 25.6  |

|      |       |       |       |       |       |
|------|-------|-------|-------|-------|-------|
| 5778 | 68.42 | 59.29 | 36.26 | 30.8  | 25.61 |
| 5780 | 68.36 | 59.24 | 36.25 | 30.78 | 25.59 |
| 5782 | 68.3  | 59.21 | 36.24 | 30.77 | 25.59 |
| 5784 | 68.25 | 59.18 | 36.23 | 30.77 | 25.59 |
| 5786 | 68.2  | 59.15 | 36.23 | 30.77 | 25.59 |
| 5788 | 68.15 | 59.12 | 36.22 | 30.76 | 25.59 |
| 5790 | 68.07 | 59.07 | 36.19 | 30.72 | 25.56 |
| 5792 | 68.03 | 59.04 | 36.2  | 30.75 | 25.58 |
| 5794 | 67.98 | 59.01 | 36.2  | 30.75 | 25.57 |
| 5796 | 67.93 | 58.99 | 36.19 | 30.73 | 25.57 |
| 5798 | 67.89 | 58.96 | 36.18 | 30.73 | 25.57 |
| 5800 | 67.83 | 58.93 | 36.17 | 30.73 | 25.56 |
| 5802 | 67.79 | 58.9  | 36.17 | 30.74 | 25.56 |
| 5804 | 67.73 | 58.88 | 36.16 | 30.73 | 25.56 |
| 5806 | 67.68 | 58.84 | 36.15 | 30.72 | 25.56 |
| 5808 | 67.62 | 58.81 | 36.16 | 30.72 | 25.56 |
| 5810 | 67.58 | 58.79 | 36.15 | 30.72 | 25.56 |
| 5812 | 67.53 | 58.77 | 36.16 | 30.73 | 25.57 |
| 5814 | 67.46 | 58.72 | 36.13 | 30.7  | 25.54 |
| 5816 | 67.39 | 58.68 | 36.11 | 30.68 | 25.54 |
| 5818 | 67.34 | 58.64 | 36.1  | 30.67 | 25.54 |
| 5820 | 67.28 | 58.61 | 36.09 | 30.66 | 25.54 |
| 5822 | 67.22 | 58.57 | 36.07 | 30.64 | 25.52 |
| 5824 | 67.15 | 58.53 | 36.06 | 30.63 | 25.5  |
| 5826 | 67.09 | 58.48 | 36.03 | 30.6  | 25.49 |
| 5828 | 67.03 | 58.44 | 36.01 | 30.59 | 25.47 |
| 5830 | 67.01 | 58.44 | 36.04 | 30.62 | 25.5  |
| 5832 | 66.97 | 58.42 | 36.04 | 30.63 | 25.51 |
| 5834 | 66.91 | 58.37 | 36.03 | 30.62 | 25.5  |
| 5836 | 66.84 | 58.34 | 36.01 | 30.6  | 25.47 |
| 5838 | 66.79 | 58.3  | 36.02 | 30.61 | 25.48 |
| 5840 | 66.75 | 58.27 | 35.99 | 30.58 | 25.47 |
| 5842 | 66.71 | 58.26 | 35.99 | 30.58 | 25.46 |
| 5844 | 66.63 | 58.2  | 35.96 | 30.55 | 25.43 |
| 5846 | 66.57 | 58.14 | 35.93 | 30.52 | 25.41 |
| 5848 | 66.55 | 58.15 | 35.97 | 30.57 | 25.46 |
| 5850 | 66.48 | 58.11 | 35.94 | 30.54 | 25.43 |
| 5852 | 66.45 | 58.09 | 35.95 | 30.54 | 25.44 |
| 5854 | 66.43 | 58.09 | 35.97 | 30.56 | 25.47 |
| 5856 | 66.38 | 58.07 | 35.96 | 30.57 | 25.48 |
| 5858 | 66.33 | 58.04 | 35.96 | 30.57 | 25.47 |
| 5860 | 66.26 | 57.98 | 35.94 | 30.54 | 25.44 |
| 5862 | 66.22 | 57.96 | 35.93 | 30.55 | 25.47 |
| 5864 | 66.21 | 57.95 | 35.95 | 30.57 | 25.49 |

|      |       |       |       |       |       |
|------|-------|-------|-------|-------|-------|
| 5866 | 66.12 | 57.91 | 35.92 | 30.54 | 25.47 |
| 5868 | 66.05 | 57.86 | 35.9  | 30.52 | 25.45 |
| 5870 | 66.03 | 57.85 | 35.9  | 30.53 | 25.46 |
| 5872 | 65.98 | 57.82 | 35.9  | 30.53 | 25.46 |
| 5874 | 65.92 | 57.77 | 35.87 | 30.51 | 25.44 |
| 5876 | 65.86 | 57.74 | 35.87 | 30.48 | 25.42 |
| 5878 | 65.81 | 57.7  | 35.86 | 30.49 | 25.42 |
| 5880 | 65.72 | 57.65 | 35.82 | 30.46 | 25.4  |
| 5882 | 65.69 | 57.63 | 35.83 | 30.46 | 25.4  |
| 5884 | 65.64 | 57.6  | 35.81 | 30.44 | 25.39 |
| 5886 | 65.56 | 57.55 | 35.79 | 30.42 | 25.37 |
| 5888 | 65.5  | 57.51 | 35.78 | 30.41 | 25.38 |
| 5890 | 65.47 | 57.5  | 35.81 | 30.44 | 25.39 |
| 5892 | 65.43 | 57.48 | 35.8  | 30.44 | 25.4  |
| 5894 | 65.38 | 57.46 | 35.79 | 30.44 | 25.4  |
| 5896 | 65.33 | 57.43 | 35.78 | 30.41 | 25.39 |
| 5898 | 65.31 | 57.42 | 35.79 | 30.43 | 25.4  |
| 5900 | 65.25 | 57.37 | 35.77 | 30.42 | 25.39 |
| 5902 | 65.19 | 57.36 | 35.78 | 30.42 | 25.4  |
| 5904 | 65.12 | 57.31 | 35.75 | 30.39 | 25.38 |
| 5906 | 65.06 | 57.26 | 35.71 | 30.36 | 25.35 |
| 5908 | 65.03 | 57.25 | 35.73 | 30.38 | 25.37 |
| 5910 | 65.01 | 57.25 | 35.76 | 30.41 | 25.4  |
| 5912 | 64.91 | 57.18 | 35.7  | 30.35 | 25.35 |
| 5914 | 64.91 | 57.19 | 35.73 | 30.39 | 25.38 |
| 5916 | 64.88 | 57.17 | 35.74 | 30.4  | 25.4  |
| 5918 | 64.84 | 57.14 | 35.73 | 30.39 | 25.4  |
| 5920 | 64.78 | 57.11 | 35.73 | 30.39 | 25.39 |
| 5922 | 64.73 | 57.08 | 35.72 | 30.38 | 25.39 |
| 5924 | 64.68 | 57.04 | 35.7  | 30.36 | 25.36 |
| 5926 | 64.59 | 56.99 | 35.66 | 30.33 | 25.34 |
| 5928 | 64.52 | 56.94 | 35.63 | 30.31 | 25.32 |
| 5930 | 64.47 | 56.9  | 35.63 | 30.3  | 25.32 |
| 5932 | 64.42 | 56.86 | 35.61 | 30.29 | 25.3  |
| 5934 | 64.38 | 56.83 | 35.6  | 30.28 | 25.31 |
| 5936 | 64.34 | 56.81 | 35.61 | 30.28 | 25.31 |
| 5938 | 64.29 | 56.78 | 35.6  | 30.27 | 25.3  |
| 5940 | 64.25 | 56.76 | 35.59 | 30.28 | 25.3  |
| 5942 | 64.2  | 56.73 | 35.58 | 30.27 | 25.29 |
| 5944 | 64.16 | 56.71 | 35.59 | 30.27 | 25.3  |
| 5946 | 64.15 | 56.71 | 35.61 | 30.29 | 25.31 |
| 5948 | 64.08 | 56.66 | 35.59 | 30.27 | 25.3  |
| 5950 | 64.05 | 56.65 | 35.59 | 30.28 | 25.32 |
| 5952 | 63.97 | 56.59 | 35.56 | 30.25 | 25.29 |

|      |       |       |       |       |       |
|------|-------|-------|-------|-------|-------|
| 5954 | 63.92 | 56.57 | 35.55 | 30.25 | 25.29 |
| 5956 | 63.9  | 56.56 | 35.56 | 30.26 | 25.3  |
| 5958 | 63.85 | 56.52 | 35.56 | 30.25 | 25.3  |
| 5960 | 63.79 | 56.48 | 35.53 | 30.23 | 25.28 |
| 5962 | 63.76 | 56.47 | 35.54 | 30.24 | 25.3  |
| 5964 | 63.7  | 56.43 | 35.54 | 30.25 | 25.3  |
| 5966 | 63.65 | 56.4  | 35.51 | 30.22 | 25.28 |
| 5968 | 63.59 | 56.36 | 35.5  | 30.21 | 25.26 |
| 5970 | 63.55 | 56.33 | 35.5  | 30.2  | 25.26 |
| 5972 | 63.51 | 56.31 | 35.5  | 30.22 | 25.28 |
| 5974 | 63.46 | 56.27 | 35.48 | 30.19 | 25.26 |
| 5976 | 63.4  | 56.23 | 35.46 | 30.18 | 25.26 |
| 5978 | 63.37 | 56.22 | 35.47 | 30.18 | 25.27 |
| 5980 | 63.32 | 56.19 | 35.46 | 30.18 | 25.26 |
| 5982 | 63.24 | 56.13 | 35.42 | 30.14 | 25.22 |
| 5984 | 63.2  | 56.11 | 35.42 | 30.15 | 25.23 |
| 5986 | 63.15 | 56.08 | 35.43 | 30.15 | 25.24 |
| 5988 | 63.1  | 56.06 | 35.42 | 30.14 | 25.24 |
| 5990 | 63.06 | 56.03 | 35.41 | 30.14 | 25.23 |
| 5992 | 63.04 | 56.02 | 35.43 | 30.15 | 25.24 |
| 5994 | 62.98 | 55.98 | 35.41 | 30.14 | 25.23 |
| 5996 | 62.92 | 55.95 | 35.4  | 30.14 | 25.23 |
| 5998 | 62.9  | 55.94 | 35.41 | 30.14 | 25.23 |
| 6000 | 62.84 | 55.9  | 35.38 | 30.12 | 25.22 |
| 6002 | 62.79 | 55.88 | 35.38 | 30.11 | 25.22 |
| 6004 | 62.75 | 55.85 | 35.38 | 30.11 | 25.23 |
| 6006 | 62.71 | 55.83 | 35.38 | 30.13 | 25.24 |
| 6008 | 62.67 | 55.8  | 35.37 | 30.12 | 25.24 |
| 6010 | 62.62 | 55.76 | 35.35 | 30.09 | 25.21 |
| 6012 | 62.55 | 55.72 | 35.33 | 30.07 | 25.19 |
| 6014 | 62.53 | 55.69 | 35.33 | 30.08 | 25.2  |
| 6016 | 62.48 | 55.67 | 35.32 | 30.08 | 25.21 |
| 6018 | 62.44 | 55.64 | 35.32 | 30.08 | 25.21 |
| 6020 | 62.4  | 55.62 | 35.31 | 30.07 | 25.19 |
| 6022 | 62.33 | 55.58 | 35.3  | 30.05 | 25.18 |
| 6024 | 62.3  | 55.56 | 35.3  | 30.06 | 25.19 |
| 6026 | 62.25 | 55.51 | 35.28 | 30.04 | 25.18 |
| 6028 | 62.19 | 55.47 | 35.25 | 30.02 | 25.16 |
| 6030 | 62.1  | 55.4  | 35.21 | 29.98 | 25.12 |
| 6032 | 62.1  | 55.41 | 35.23 | 30.01 | 25.15 |
| 6034 | 62.06 | 55.4  | 35.25 | 30.01 | 25.17 |
| 6036 | 62.01 | 55.36 | 35.23 | 30    | 25.16 |
| 6038 | 61.94 | 55.32 | 35.2  | 29.97 | 25.13 |
| 6040 | 61.94 | 55.32 | 35.23 | 29.99 | 25.15 |

|      |       |       |       |       |       |
|------|-------|-------|-------|-------|-------|
| 6042 | 61.91 | 55.3  | 35.24 | 30.01 | 25.17 |
| 6044 | 61.86 | 55.28 | 35.23 | 30.01 | 25.17 |
| 6046 | 61.8  | 55.23 | 35.2  | 29.99 | 25.16 |
| 6048 | 61.77 | 55.21 | 35.21 | 29.99 | 25.16 |
| 6050 | 61.72 | 55.19 | 35.21 | 29.99 | 25.16 |
| 6052 | 61.7  | 55.18 | 35.21 | 30.01 | 25.17 |
| 6054 | 61.64 | 55.15 | 35.2  | 30    | 25.17 |
| 6056 | 61.63 | 55.15 | 35.22 | 30.01 | 25.2  |
| 6058 | 61.57 | 55.11 | 35.23 | 30.02 | 25.21 |
| 6060 | 61.53 | 55.09 | 35.23 | 30.02 | 25.21 |
| 6062 | 61.44 | 55.02 | 35.17 | 29.95 | 25.16 |
| 6064 | 61.42 | 55.02 | 35.18 | 29.97 | 25.19 |
| 6066 | 61.36 | 54.97 | 35.15 | 29.96 | 25.18 |
| 6068 | 61.35 | 54.98 | 35.18 | 29.98 | 25.19 |
| 6070 | 61.28 | 54.94 | 35.16 | 29.96 | 25.17 |
| 6072 | 61.21 | 54.88 | 35.12 | 29.92 | 25.14 |
| 6074 | 61.19 | 54.87 | 35.13 | 29.93 | 25.15 |
| 6076 | 61.16 | 54.85 | 35.14 | 29.93 | 25.16 |
| 6078 | 61.1  | 54.82 | 35.12 | 29.92 | 25.15 |
| 6080 | 61.03 | 54.77 | 35.1  | 29.91 | 25.12 |
| 6082 | 60.99 | 54.75 | 35.09 | 29.9  | 25.13 |
| 6084 | 60.97 | 54.75 | 35.11 | 29.92 | 25.16 |
| 6086 | 60.92 | 54.71 | 35.1  | 29.91 | 25.15 |
| 6088 | 60.89 | 54.69 | 35.1  | 29.92 | 25.16 |
| 6090 | 60.85 | 54.67 | 35.09 | 29.91 | 25.13 |
| 6092 | 60.8  | 54.63 | 35.08 | 29.9  | 25.13 |
| 6094 | 60.72 | 54.57 | 35.04 | 29.86 | 25.09 |
| 6096 | 60.69 | 54.55 | 35.03 | 29.85 | 25.09 |
| 6098 | 60.66 | 54.54 | 35.05 | 29.87 | 25.11 |
| 6100 | 60.62 | 54.51 | 35.05 | 29.87 | 25.11 |
| 6102 | 60.63 | 54.54 | 35.09 | 29.92 | 25.16 |
| 6104 | 60.6  | 54.53 | 35.08 | 29.92 | 25.16 |
| 6106 | 60.55 | 54.5  | 35.07 | 29.92 | 25.16 |
| 6108 | 60.51 | 54.47 | 35.08 | 29.91 | 25.16 |
| 6110 | 60.45 | 54.42 | 35.06 | 29.89 | 25.15 |
| 6112 | 60.39 | 54.39 | 35.04 | 29.87 | 25.14 |
| 6114 | 60.35 | 54.37 | 35.02 | 29.86 | 25.12 |
| 6116 | 60.28 | 54.3  | 34.98 | 29.82 | 25.09 |
| 6118 | 60.25 | 54.29 | 34.99 | 29.83 | 25.1  |
| 6120 | 60.19 | 54.24 | 34.96 | 29.81 | 25.08 |
| 6122 | 60.16 | 54.23 | 34.97 | 29.81 | 25.09 |
| 6124 | 60.1  | 54.19 | 34.95 | 29.79 | 25.08 |
| 6126 | 60.09 | 54.19 | 34.96 | 29.81 | 25.09 |
| 6128 | 60.04 | 54.18 | 34.97 | 29.81 | 25.09 |

|      |       |       |       |       |       |
|------|-------|-------|-------|-------|-------|
| 6130 | 59.99 | 54.12 | 34.94 | 29.8  | 25.09 |
| 6132 | 59.99 | 54.14 | 34.98 | 29.84 | 25.13 |
| 6134 | 59.93 | 54.1  | 34.95 | 29.81 | 25.12 |
| 6136 | 59.89 | 54.09 | 34.97 | 29.82 | 25.12 |
| 6138 | 59.84 | 54.05 | 34.94 | 29.8  | 25.11 |
| 6140 | 59.83 | 54.04 | 34.96 | 29.82 | 25.12 |
| 6142 | 59.78 | 54.02 | 34.95 | 29.82 | 25.12 |
| 6144 | 59.74 | 54    | 34.95 | 29.82 | 25.12 |
| 6146 | 59.69 | 53.97 | 34.94 | 29.81 | 25.11 |
| 6148 | 59.65 | 53.94 | 34.93 | 29.8  | 25.11 |
| 6150 | 59.61 | 53.92 | 34.92 | 29.8  | 25.11 |
| 6152 | 59.56 | 53.89 | 34.92 | 29.79 | 25.11 |
| 6154 | 59.5  | 53.84 | 34.9  | 29.77 | 25.08 |
| 6156 | 59.45 | 53.8  | 34.88 | 29.74 | 25.06 |
| 6158 | 59.4  | 53.79 | 34.87 | 29.75 | 25.07 |
| 6160 | 59.36 | 53.74 | 34.86 | 29.74 | 25.07 |
| 6162 | 59.3  | 53.7  | 34.82 | 29.71 | 25.04 |
| 6164 | 59.31 | 53.72 | 34.87 | 29.76 | 25.09 |
| 6166 | 59.28 | 53.7  | 34.87 | 29.76 | 25.09 |
| 6168 | 59.22 | 53.67 | 34.85 | 29.74 | 25.08 |
| 6170 | 59.19 | 53.65 | 34.86 | 29.75 | 25.09 |
| 6172 | 59.1  | 53.58 | 34.81 | 29.7  | 25.04 |
| 6174 | 59.1  | 53.59 | 34.84 | 29.73 | 25.08 |
| 6176 | 59.06 | 53.57 | 34.84 | 29.74 | 25.08 |
| 6178 | 59.02 | 53.54 | 34.83 | 29.73 | 25.08 |
| 6180 | 58.98 | 53.52 | 34.82 | 29.73 | 25.07 |
| 6182 | 58.93 | 53.49 | 34.82 | 29.72 | 25.07 |
| 6184 | 58.86 | 53.46 | 34.79 | 29.69 | 25.04 |
| 6186 | 58.82 | 53.4  | 34.77 | 29.66 | 25.03 |
| 6188 | 58.79 | 53.4  | 34.79 | 29.69 | 25.06 |
| 6190 | 58.76 | 53.37 | 34.78 | 29.68 | 25.06 |
| 6192 | 58.69 | 53.33 | 34.75 | 29.65 | 25.06 |
| 6194 | 58.65 | 53.3  | 34.75 | 29.66 | 25.05 |
| 6196 | 58.63 | 53.29 | 34.76 | 29.67 | 25.05 |
| 6198 | 58.61 | 53.28 | 34.76 | 29.67 | 25.05 |
| 6200 | 58.54 | 53.23 | 34.75 | 29.66 | 25.05 |
| 6202 | 58.5  | 53.21 | 34.73 | 29.65 | 25.04 |
| 6204 | 58.44 | 53.15 | 34.69 | 29.61 | 25    |
| 6206 | 58.37 | 53.1  | 34.66 | 29.57 | 24.98 |
| 6208 | 58.34 | 53.09 | 34.68 | 29.6  | 25.01 |
| 6210 | 58.32 | 53.07 | 34.66 | 29.59 | 24.99 |
| 6212 | 58.26 | 53.03 | 34.65 | 29.57 | 24.97 |
| 6214 | 58.21 | 52.99 | 34.64 | 29.56 | 24.96 |
| 6216 | 58.17 | 52.98 | 34.63 | 29.56 | 24.96 |

|      |       |       |       |       |       |
|------|-------|-------|-------|-------|-------|
| 6218 | 58.15 | 52.97 | 34.64 | 29.58 | 24.97 |
| 6220 | 58.13 | 52.96 | 34.65 | 29.58 | 24.99 |
| 6222 | 58.09 | 52.93 | 34.65 | 29.58 | 24.99 |
| 6224 | 58.07 | 52.92 | 34.66 | 29.58 | 25    |
| 6226 | 58.03 | 52.9  | 34.64 | 29.6  | 25.01 |
| 6228 | 57.98 | 52.86 | 34.63 | 29.57 | 24.99 |
| 6230 | 57.97 | 52.88 | 34.67 | 29.61 | 25.03 |
| 6232 | 57.92 | 52.84 | 34.65 | 29.59 | 25.02 |
| 6234 | 57.88 | 52.81 | 34.64 | 29.59 | 25.01 |
| 6236 | 57.84 | 52.78 | 34.63 | 29.58 | 25.01 |
| 6238 | 57.8  | 52.76 | 34.62 | 29.57 | 25    |
| 6240 | 57.77 | 52.74 | 34.63 | 29.58 | 25.02 |
| 6242 | 57.7  | 52.68 | 34.59 | 29.53 | 24.98 |
| 6244 | 57.66 | 52.66 | 34.6  | 29.53 | 24.99 |
| 6246 | 57.6  | 52.61 | 34.55 | 29.51 | 24.97 |
| 6248 | 57.59 | 52.61 | 34.57 | 29.54 | 24.99 |
| 6250 | 57.56 | 52.59 | 34.58 | 29.53 | 24.99 |
| 6252 | 57.52 | 52.57 | 34.57 | 29.53 | 24.99 |
| 6254 | 57.48 | 52.54 | 34.56 | 29.52 | 24.99 |
| 6256 | 57.44 | 52.52 | 34.56 | 29.51 | 24.98 |
| 6258 | 57.4  | 52.49 | 34.56 | 29.51 | 24.98 |
| 6260 | 57.38 | 52.49 | 34.56 | 29.52 | 24.99 |
| 6262 | 57.34 | 52.46 | 34.55 | 29.53 | 24.99 |
| 6264 | 57.29 | 52.42 | 34.54 | 29.51 | 24.98 |
| 6266 | 57.25 | 52.4  | 34.54 | 29.5  | 24.97 |
| 6268 | 57.21 | 52.37 | 34.52 | 29.5  | 24.97 |
| 6270 | 57.17 | 52.35 | 34.51 | 29.49 | 24.97 |
| 6272 | 57.14 | 52.32 | 34.51 | 29.48 | 24.97 |
| 6274 | 57.09 | 52.3  | 34.5  | 29.48 | 24.97 |
| 6276 | 57.06 | 52.27 | 34.49 | 29.47 | 24.96 |
| 6278 | 57.03 | 52.26 | 34.49 | 29.48 | 24.97 |
| 6280 | 57    | 52.23 | 34.49 | 29.48 | 24.97 |
| 6282 | 56.95 | 52.19 | 34.47 | 29.46 | 24.94 |
| 6284 | 56.91 | 52.17 | 34.47 | 29.45 | 24.95 |
| 6286 | 56.88 | 52.16 | 34.47 | 29.46 | 24.95 |
| 6288 | 56.84 | 52.14 | 34.47 | 29.45 | 24.94 |
| 6290 | 56.77 | 52.07 | 34.43 | 29.42 | 24.9  |
| 6292 | 56.74 | 52.06 | 34.44 | 29.42 | 24.93 |
| 6294 | 56.71 | 52.05 | 34.42 | 29.41 | 24.93 |
| 6296 | 56.66 | 52    | 34.4  | 29.41 | 24.93 |
| 6298 | 56.61 | 51.98 | 34.41 | 29.39 | 24.92 |
| 6300 | 56.59 | 51.97 | 34.41 | 29.4  | 24.93 |
| 6302 | 56.56 | 51.95 | 34.42 | 29.42 | 24.94 |
| 6304 | 56.51 | 51.9  | 34.37 | 29.37 | 24.9  |

|      |       |       |       |       |       |
|------|-------|-------|-------|-------|-------|
| 6306 | 56.48 | 51.88 | 34.39 | 29.38 | 24.92 |
| 6308 | 56.44 | 51.86 | 34.38 | 29.4  | 24.91 |
| 6310 | 56.43 | 51.88 | 34.4  | 29.41 | 24.93 |
| 6312 | 56.36 | 51.82 | 34.38 | 29.39 | 24.9  |
| 6314 | 56.32 | 51.79 | 34.36 | 29.38 | 24.89 |
| 6316 | 56.27 | 51.76 | 34.35 | 29.36 | 24.89 |
| 6318 | 56.24 | 51.74 | 34.33 | 29.36 | 24.89 |
| 6320 | 56.19 | 51.7  | 34.31 | 29.34 | 24.87 |
| 6322 | 56.19 | 51.72 | 34.35 | 29.37 | 24.91 |
| 6324 | 56.15 | 51.69 | 34.34 | 29.37 | 24.91 |
| 6326 | 56.14 | 51.7  | 34.37 | 29.39 | 24.94 |
| 6328 | 56.08 | 51.65 | 34.35 | 29.37 | 24.93 |
| 6330 | 56.04 | 51.62 | 34.33 | 29.35 | 24.91 |
| 6332 | 56    | 51.6  | 34.32 | 29.35 | 24.91 |
| 6334 | 55.97 | 51.57 | 34.31 | 29.35 | 24.9  |
| 6336 | 55.93 | 51.55 | 34.31 | 29.34 | 24.9  |
| 6338 | 55.89 | 51.52 | 34.3  | 29.33 | 24.9  |
| 6340 | 55.85 | 51.49 | 34.28 | 29.32 | 24.87 |
| 6342 | 55.8  | 51.46 | 34.26 | 29.31 | 24.86 |
| 6344 | 55.77 | 51.45 | 34.27 | 29.32 | 24.89 |
| 6346 | 55.73 | 51.42 | 34.24 | 29.29 | 24.85 |
| 6348 | 55.71 | 51.42 | 34.27 | 29.32 | 24.89 |
| 6350 | 55.66 | 51.37 | 34.27 | 29.31 | 24.88 |
| 6352 | 55.64 | 51.36 | 34.26 | 29.31 | 24.89 |
| 6354 | 55.59 | 51.34 | 34.25 | 29.29 | 24.89 |
| 6356 | 55.52 | 51.27 | 34.22 | 29.27 | 24.87 |
| 6358 | 55.51 | 51.28 | 34.23 | 29.28 | 24.87 |
| 6360 | 55.48 | 51.27 | 34.23 | 29.29 | 24.88 |
| 6362 | 55.44 | 51.25 | 34.22 | 29.28 | 24.87 |
| 6364 | 55.4  | 51.22 | 34.22 | 29.27 | 24.88 |
| 6366 | 55.36 | 51.19 | 34.2  | 29.25 | 24.86 |
| 6368 | 55.33 | 51.18 | 34.21 | 29.26 | 24.87 |
| 6370 | 55.31 | 51.16 | 34.21 | 29.27 | 24.87 |
| 6372 | 55.28 | 51.14 | 34.2  | 29.27 | 24.87 |
| 6374 | 55.24 | 51.11 | 34.19 | 29.26 | 24.86 |
| 6376 | 55.19 | 51.09 | 34.17 | 29.24 | 24.85 |
| 6378 | 55.16 | 51.07 | 34.17 | 29.26 | 24.85 |
| 6380 | 55.09 | 51.01 | 34.14 | 29.21 | 24.82 |
| 6382 | 55.06 | 51    | 34.14 | 29.22 | 24.83 |
| 6384 | 55.04 | 50.99 | 34.15 | 29.23 | 24.84 |
| 6386 | 54.99 | 50.95 | 34.13 | 29.22 | 24.84 |
| 6388 | 54.94 | 50.9  | 34.11 | 29.19 | 24.81 |
| 6390 | 54.92 | 50.9  | 34.12 | 29.19 | 24.82 |
| 6392 | 54.9  | 50.89 | 34.12 | 29.21 | 24.84 |



|      |       |       |       |       |       |
|------|-------|-------|-------|-------|-------|
| 6394 | 54.85 | 50.86 | 34.11 | 29.2  | 24.83 |
| 6396 | 54.81 | 50.82 | 34.09 | 29.17 | 24.81 |
| 6398 | 54.8  | 50.82 | 34.11 | 29.19 | 24.83 |
| 6400 | 54.76 | 50.8  | 34.1  | 29.19 | 24.84 |
| 6402 | 54.73 | 50.76 | 34.09 | 29.16 | 24.8  |
| 6404 | 54.7  | 50.75 | 34.09 | 29.18 | 24.82 |
| 6406 | 54.67 | 50.74 | 34.09 | 29.19 | 24.82 |
| 6408 | 54.63 | 50.71 | 34.09 | 29.18 | 24.83 |
| 6410 | 54.6  | 50.69 | 34.07 | 29.17 | 24.83 |
| 6412 | 54.56 | 50.66 | 34.07 | 29.18 | 24.82 |
| 6414 | 54.53 | 50.64 | 34.06 | 29.17 | 24.82 |
| 6416 | 54.48 | 50.62 | 34.06 | 29.16 | 24.82 |
| 6418 | 54.45 | 50.58 | 34.04 | 29.15 | 24.82 |
| 6420 | 54.41 | 50.56 | 34.04 | 29.13 | 24.82 |
| 6422 | 54.37 | 50.53 | 34.02 | 29.11 | 24.8  |
| 6424 | 54.32 | 50.49 | 34    | 29.11 | 24.79 |
| 6426 | 54.3  | 50.48 | 34.01 | 29.13 | 24.8  |
| 6428 | 54.28 | 50.47 | 34.02 | 29.13 | 24.8  |
| 6430 | 54.25 | 50.45 | 34.01 | 29.11 | 24.8  |
| 6432 | 54.2  | 50.42 | 34    | 29.12 | 24.79 |
| 6434 | 54.17 | 50.4  | 33.99 | 29.11 | 24.79 |
| 6436 | 54.14 | 50.38 | 33.99 | 29.11 | 24.79 |
| 6438 | 54.12 | 50.38 | 34.01 | 29.13 | 24.82 |
| 6440 | 54.12 | 50.38 | 34.01 | 29.16 | 24.83 |
| 6442 | 54.11 | 50.38 | 34.03 | 29.17 | 24.84 |
| 6444 | 54.07 | 50.36 | 34.03 | 29.17 | 24.84 |
| 6446 | 54.04 | 50.33 | 34.02 | 29.16 | 24.84 |
| 6448 | 54    | 50.32 | 34.02 | 29.15 | 24.84 |
| 6450 | 53.94 | 50.27 | 33.99 | 29.12 | 24.82 |
| 6452 | 53.9  | 50.24 | 33.97 | 29.11 | 24.81 |
| 6454 | 53.87 | 50.22 | 33.98 | 29.12 | 24.82 |
| 6456 | 53.84 | 50.19 | 33.99 | 29.12 | 24.83 |
| 6458 | 53.76 | 50.16 | 33.93 | 29.08 | 24.78 |
| 6460 | 53.74 | 50.14 | 33.94 | 29.07 | 24.79 |
| 6462 | 53.69 | 50.09 | 33.91 | 29.05 | 24.77 |
| 6464 | 53.65 | 50.06 | 33.91 | 29.04 | 24.76 |
| 6466 | 53.61 | 50.03 | 33.9  | 29.04 | 24.77 |
| 6468 | 53.58 | 50.01 | 33.89 | 29.03 | 24.76 |
| 6470 | 53.55 | 50    | 33.9  | 29.05 | 24.78 |
| 6472 | 53.52 | 49.98 | 33.89 | 29.05 | 24.79 |
| 6474 | 53.51 | 49.99 | 33.91 | 29.06 | 24.78 |
| 6476 | 53.46 | 49.94 | 33.87 | 29.03 | 24.76 |
| 6478 | 53.42 | 49.92 | 33.88 | 29.03 | 24.78 |
| 6480 | 53.39 | 49.9  | 33.88 | 29.04 | 24.8  |

|      |       |       |       |       |       |
|------|-------|-------|-------|-------|-------|
| 6482 | 53.36 | 49.86 | 33.85 | 29.03 | 24.76 |
| 6484 | 53.37 | 49.89 | 33.89 | 29.06 | 24.82 |
| 6486 | 53.3  | 49.85 | 33.86 | 29.03 | 24.78 |
| 6488 | 53.28 | 49.82 | 33.86 | 29.02 | 24.77 |
| 6490 | 53.27 | 49.83 | 33.88 | 29.05 | 24.81 |
| 6492 | 53.23 | 49.79 | 33.87 | 29.03 | 24.79 |
| 6494 | 53.16 | 49.74 | 33.83 | 29    | 24.76 |
| 6496 | 53.14 | 49.72 | 33.84 | 29.02 | 24.77 |
| 6498 | 53.09 | 49.69 | 33.83 | 29.01 | 24.76 |
| 6500 | 53.1  | 49.71 | 33.85 | 29.03 | 24.79 |
| 6502 | 53.07 | 49.69 | 33.85 | 29.03 | 24.79 |
| 6504 | 53    | 49.64 | 33.82 | 29    | 24.76 |
| 6506 | 52.95 | 49.6  | 33.78 | 28.98 | 24.73 |
| 6508 | 52.93 | 49.59 | 33.79 | 28.99 | 24.74 |
| 6510 | 52.89 | 49.56 | 33.78 | 28.96 | 24.73 |
| 6512 | 52.83 | 49.51 | 33.75 | 28.95 | 24.72 |
| 6514 | 52.82 | 49.51 | 33.75 | 28.94 | 24.71 |
| 6516 | 52.83 | 49.52 | 33.78 | 28.98 | 24.75 |
| 6518 | 52.76 | 49.46 | 33.74 | 28.95 | 24.72 |
| 6520 | 52.73 | 49.45 | 33.74 | 28.94 | 24.72 |
| 6522 | 52.69 | 49.42 | 33.73 | 28.93 | 24.71 |
| 6524 | 52.64 | 49.39 | 33.73 | 28.92 | 24.7  |
| 6526 | 52.59 | 49.35 | 33.69 | 28.9  | 24.69 |
| 6528 | 52.59 | 49.36 | 33.72 | 28.92 | 24.71 |
| 6530 | 52.55 | 49.33 | 33.7  | 28.91 | 24.71 |
| 6532 | 52.52 | 49.32 | 33.7  | 28.91 | 24.72 |
| 6534 | 52.49 | 49.3  | 33.7  | 28.91 | 24.71 |
| 6536 | 52.45 | 49.26 | 33.69 | 28.89 | 24.7  |
| 6538 | 52.42 | 49.24 | 33.68 | 28.89 | 24.7  |
| 6540 | 52.38 | 49.22 | 33.67 | 28.89 | 24.7  |
| 6542 | 52.36 | 49.2  | 33.67 | 28.89 | 24.7  |
| 6544 | 52.34 | 49.2  | 33.68 | 28.9  | 24.7  |
| 6546 | 52.3  | 49.19 | 33.68 | 28.91 | 24.71 |
| 6548 | 52.27 | 49.15 | 33.66 | 28.89 | 24.7  |
| 6550 | 52.24 | 49.12 | 33.65 | 28.88 | 24.68 |
| 6552 | 52.21 | 49.1  | 33.64 | 28.88 | 24.69 |
| 6554 | 52.17 | 49.08 | 33.64 | 28.87 | 24.68 |
| 6556 | 52.14 | 49.06 | 33.63 | 28.87 | 24.69 |
| 6558 | 52.12 | 49.05 | 33.64 | 28.87 | 24.69 |
| 6560 | 52.04 | 48.99 | 33.59 | 28.83 | 24.67 |
| 6562 | 52.04 | 49    | 33.61 | 28.85 | 24.68 |
| 6564 | 52    | 48.96 | 33.6  | 28.84 | 24.67 |
| 6566 | 51.99 | 48.95 | 33.62 | 28.86 | 24.69 |
| 6568 | 51.94 | 48.93 | 33.6  | 28.84 | 24.68 |

|      |       |       |       |       |       |
|------|-------|-------|-------|-------|-------|
| 6570 | 51.91 | 48.9  | 33.58 | 28.83 | 24.67 |
| 6572 | 51.88 | 48.88 | 33.57 | 28.82 | 24.67 |
| 6574 | 51.84 | 48.86 | 33.57 | 28.82 | 24.67 |
| 6576 | 51.82 | 48.84 | 33.57 | 28.82 | 24.67 |
| 6578 | 51.81 | 48.83 | 33.58 | 28.83 | 24.67 |
| 6580 | 51.8  | 48.83 | 33.59 | 28.86 | 24.69 |
| 6582 | 51.77 | 48.82 | 33.57 | 28.85 | 24.68 |
| 6584 | 51.76 | 48.82 | 33.6  | 28.87 | 24.71 |
| 6586 | 51.7  | 48.78 | 33.58 | 28.84 | 24.68 |
| 6588 | 51.65 | 48.74 | 33.56 | 28.82 | 24.67 |
| 6590 | 51.61 | 48.7  | 33.53 | 28.8  | 24.66 |
| 6592 | 51.57 | 48.68 | 33.52 | 28.8  | 24.65 |
| 6594 | 51.57 | 48.69 | 33.55 | 28.83 | 24.67 |
| 6596 | 51.51 | 48.64 | 33.51 | 28.8  | 24.65 |
| 6598 | 51.5  | 48.63 | 33.52 | 28.79 | 24.65 |
| 6600 | 51.46 | 48.59 | 33.51 | 28.79 | 24.65 |
| 6602 | 51.42 | 48.56 | 33.51 | 28.78 | 24.65 |
| 6604 | 51.4  | 48.56 | 33.49 | 28.77 | 24.65 |
| 6606 | 51.38 | 48.56 | 33.5  | 28.8  | 24.67 |
| 6608 | 51.31 | 48.49 | 33.47 | 28.75 | 24.64 |
| 6610 | 51.28 | 48.47 | 33.46 | 28.75 | 24.63 |
| 6612 | 51.25 | 48.45 | 33.45 | 28.74 | 24.63 |
| 6614 | 51.22 | 48.43 | 33.45 | 28.73 | 24.63 |
| 6616 | 51.19 | 48.41 | 33.44 | 28.73 | 24.63 |
| 6618 | 51.16 | 48.39 | 33.43 | 28.73 | 24.62 |
| 6620 | 51.13 | 48.37 | 33.43 | 28.73 | 24.62 |
| 6622 | 51.12 | 48.36 | 33.43 | 28.73 | 24.64 |
| 6624 | 51.09 | 48.34 | 33.43 | 28.73 | 24.63 |
| 6626 | 51.06 | 48.31 | 33.42 | 28.73 | 24.63 |
| 6628 | 51.03 | 48.3  | 33.43 | 28.73 | 24.63 |
| 6630 | 51.04 | 48.32 | 33.46 | 28.77 | 24.66 |
| 6632 | 50.98 | 48.28 | 33.42 | 28.74 | 24.64 |
| 6634 | 50.96 | 48.25 | 33.42 | 28.72 | 24.62 |
| 6636 | 50.9  | 48.22 | 33.4  | 28.71 | 24.61 |
| 6638 | 50.87 | 48.19 | 33.39 | 28.7  | 24.6  |
| 6640 | 50.85 | 48.17 | 33.4  | 28.71 | 24.61 |
| 6642 | 50.86 | 48.2  | 33.43 | 28.75 | 24.64 |
| 6644 | 50.8  | 48.15 | 33.39 | 28.7  | 24.63 |
| 6646 | 50.74 | 48.11 | 33.36 | 28.68 | 24.6  |
| 6648 | 50.75 | 48.12 | 33.39 | 28.72 | 24.64 |
| 6650 | 50.72 | 48.1  | 33.38 | 28.7  | 24.62 |
| 6652 | 50.71 | 48.1  | 33.4  | 28.73 | 24.65 |
| 6654 | 50.63 | 48.04 | 33.35 | 28.67 | 24.62 |
| 6656 | 50.61 | 48.02 | 33.35 | 28.68 | 24.63 |

|      |       |       |       |       |       |
|------|-------|-------|-------|-------|-------|
| 6658 | 50.61 | 48.03 | 33.38 | 28.71 | 24.65 |
| 6660 | 50.57 | 48    | 33.37 | 28.7  | 24.64 |
| 6662 | 50.52 | 47.96 | 33.34 | 28.68 | 24.62 |
| 6664 | 50.52 | 47.97 | 33.36 | 28.69 | 24.64 |
| 6666 | 50.48 | 47.94 | 33.35 | 28.69 | 24.63 |
| 6668 | 50.46 | 47.93 | 33.35 | 28.69 | 24.63 |
| 6670 | 50.43 | 47.92 | 33.34 | 28.68 | 24.62 |
| 6672 | 50.39 | 47.89 | 33.34 | 28.69 | 24.62 |
| 6674 | 50.38 | 47.88 | 33.34 | 28.68 | 24.65 |
| 6676 | 50.35 | 47.87 | 33.34 | 28.69 | 24.64 |
| 6678 | 50.31 | 47.85 | 33.32 | 28.67 | 24.62 |
| 6680 | 50.25 | 47.79 | 33.29 | 28.64 | 24.58 |
| 6682 | 50.21 | 47.75 | 33.26 | 28.63 | 24.57 |
| 6684 | 50.22 | 47.76 | 33.29 | 28.65 | 24.6  |
| 6686 | 50.21 | 47.77 | 33.32 | 28.68 | 24.63 |
| 6688 | 50.16 | 47.74 | 33.29 | 28.66 | 24.62 |
| 6690 | 50.11 | 47.69 | 33.27 | 28.63 | 24.59 |
| 6692 | 50.11 | 47.71 | 33.29 | 28.65 | 24.62 |
| 6694 | 50.08 | 47.69 | 33.28 | 28.65 | 24.63 |
| 6696 | 50.03 | 47.65 | 33.28 | 28.65 | 24.61 |
| 6698 | 49.99 | 47.62 | 33.23 | 28.61 | 24.58 |
| 6700 | 49.94 | 47.57 | 33.21 | 28.59 | 24.55 |
| 6702 | 49.9  | 47.55 | 33.2  | 28.58 | 24.55 |
| 6704 | 49.88 | 47.55 | 33.22 | 28.59 | 24.57 |
| 6706 | 49.88 | 47.54 | 33.21 | 28.59 | 24.57 |
| 6708 | 49.87 | 47.55 | 33.24 | 28.62 | 24.6  |
| 6710 | 49.82 | 47.5  | 33.2  | 28.59 | 24.56 |
| 6712 | 49.79 | 47.49 | 33.2  | 28.58 | 24.56 |
| 6714 | 49.77 | 47.47 | 33.2  | 28.59 | 24.58 |
| 6716 | 49.71 | 47.43 | 33.17 | 28.56 | 24.55 |
| 6718 | 49.73 | 47.45 | 33.2  | 28.59 | 24.57 |
| 6720 | 49.7  | 47.42 | 33.2  | 28.59 | 24.58 |
| 6722 | 49.66 | 47.4  | 33.18 | 28.59 | 24.58 |
| 6724 | 49.63 | 47.39 | 33.19 | 28.58 | 24.59 |
| 6726 | 49.6  | 47.36 | 33.17 | 28.58 | 24.58 |
| 6728 | 49.56 | 47.35 | 33.17 | 28.57 | 24.58 |
| 6730 | 49.52 | 47.3  | 33.15 | 28.55 | 24.57 |
| 6732 | 49.51 | 47.3  | 33.15 | 28.55 | 24.56 |
| 6734 | 49.5  | 47.3  | 33.15 | 28.55 | 24.57 |
| 6736 | 49.47 | 47.28 | 33.16 | 28.57 | 24.59 |
| 6738 | 49.43 | 47.26 | 33.16 | 28.56 | 24.59 |
| 6740 | 49.41 | 47.25 | 33.15 | 28.56 | 24.57 |
| 6742 | 49.39 | 47.23 | 33.15 | 28.57 | 24.59 |
| 6744 | 49.36 | 47.21 | 33.14 | 28.56 | 24.56 |

|      |       |       |       |       |       |
|------|-------|-------|-------|-------|-------|
| 6746 | 49.34 | 47.2  | 33.15 | 28.57 | 24.58 |
| 6748 | 49.31 | 47.18 | 33.14 | 28.57 | 24.57 |
| 6750 | 49.29 | 47.16 | 33.13 | 28.55 | 24.57 |
| 6752 | 49.21 | 47.1  | 33.09 | 28.52 | 24.53 |
| 6754 | 49.18 | 47.06 | 33.08 | 28.5  | 24.53 |
| 6756 | 49.13 | 47.04 | 33.05 | 28.49 | 24.5  |
| 6758 | 49.15 | 47.06 | 33.1  | 28.51 | 24.54 |
| 6760 | 49.11 | 47.03 | 33.06 | 28.5  | 24.52 |
| 6762 | 49.06 | 46.99 | 33.06 | 28.49 | 24.52 |
| 6764 | 49.04 | 46.98 | 33.05 | 28.48 | 24.51 |
| 6766 | 49.02 | 46.97 | 33.04 | 28.48 | 24.52 |
| 6768 | 48.99 | 46.95 | 33.05 | 28.49 | 24.51 |
| 6770 | 48.95 | 46.92 | 33.03 | 28.47 | 24.51 |
| 6772 | 48.95 | 46.94 | 33.06 | 28.5  | 24.54 |
| 6774 | 48.91 | 46.9  | 33.03 | 28.49 | 24.52 |
| 6776 | 48.91 | 46.9  | 33.06 | 28.5  | 24.54 |
| 6778 | 48.84 | 46.84 | 33    | 28.44 | 24.5  |
| 6780 | 48.8  | 46.82 | 32.99 | 28.44 | 24.49 |
| 6782 | 48.77 | 46.8  | 32.98 | 28.44 | 24.49 |
| 6784 | 48.74 | 46.77 | 32.98 | 28.44 | 24.48 |
| 6786 | 48.72 | 46.76 | 32.97 | 28.43 | 24.49 |
| 6788 | 48.69 | 46.74 | 32.96 | 28.43 | 24.49 |
| 6790 | 48.68 | 46.73 | 32.97 | 28.45 | 24.51 |
| 6792 | 48.64 | 46.72 | 32.99 | 28.44 | 24.5  |
| 6794 | 48.62 | 46.69 | 32.97 | 28.44 | 24.49 |
| 6796 | 48.61 | 46.69 | 32.98 | 28.46 | 24.52 |
| 6798 | 48.6  | 46.7  | 33    | 28.47 | 24.53 |
| 6800 | 48.53 | 46.64 | 32.95 | 28.42 | 24.49 |
| 6802 | 48.5  | 46.61 | 32.93 | 28.41 | 24.47 |
| 6804 | 48.47 | 46.59 | 32.92 | 28.4  | 24.47 |
| 6806 | 48.45 | 46.57 | 32.92 | 28.4  | 24.47 |
| 6808 | 48.43 | 46.56 | 32.92 | 28.39 | 24.46 |
| 6810 | 48.39 | 46.54 | 32.92 | 28.4  | 24.47 |
| 6812 | 48.35 | 46.51 | 32.9  | 28.38 | 24.46 |
| 6814 | 48.34 | 46.51 | 32.92 | 28.4  | 24.49 |
| 6816 | 48.33 | 46.5  | 32.92 | 28.41 | 24.5  |
| 6818 | 48.25 | 46.43 | 32.87 | 28.36 | 24.47 |
| 6820 | 48.23 | 46.42 | 32.87 | 28.36 | 24.45 |
| 6822 | 48.27 | 46.46 | 32.93 | 28.42 | 24.51 |
| 6824 | 48.2  | 46.41 | 32.88 | 28.37 | 24.47 |
| 6826 | 48.17 | 46.38 | 32.88 | 28.37 | 24.48 |
| 6828 | 48.14 | 46.36 | 32.86 | 28.35 | 24.45 |
| 6830 | 48.13 | 46.35 | 32.86 | 28.37 | 24.46 |
| 6832 | 48.12 | 46.35 | 32.86 | 28.37 | 24.46 |

|      |       |       |       |       |       |
|------|-------|-------|-------|-------|-------|
| 6834 | 48.06 | 46.32 | 32.86 | 28.36 | 24.44 |
| 6836 | 48.05 | 46.31 | 32.86 | 28.37 | 24.46 |
| 6838 | 48.01 | 46.27 | 32.84 | 28.35 | 24.44 |
| 6840 | 47.99 | 46.26 | 32.85 | 28.36 | 24.45 |
| 6842 | 47.95 | 46.24 | 32.83 | 28.34 | 24.45 |
| 6844 | 47.91 | 46.21 | 32.82 | 28.32 | 24.44 |
| 6846 | 47.9  | 46.21 | 32.83 | 28.34 | 24.46 |
| 6848 | 47.87 | 46.18 | 32.81 | 28.32 | 24.44 |
| 6850 | 47.84 | 46.16 | 32.8  | 28.31 | 24.43 |
| 6852 | 47.82 | 46.14 | 32.8  | 28.31 | 24.43 |
| 6854 | 47.8  | 46.13 | 32.81 | 28.32 | 24.45 |
| 6856 | 47.82 | 46.15 | 32.84 | 28.35 | 24.48 |
| 6858 | 47.8  | 46.14 | 32.83 | 28.35 | 24.48 |
| 6860 | 47.78 | 46.12 | 32.84 | 28.36 | 24.48 |
| 6862 | 47.77 | 46.12 | 32.84 | 28.37 | 24.49 |
| 6864 | 47.69 | 46.06 | 32.79 | 28.32 | 24.44 |
| 6866 | 47.65 | 46.02 | 32.78 | 28.32 | 24.43 |
| 6868 | 47.67 | 46.04 | 32.81 | 28.34 | 24.48 |
| 6870 | 47.62 | 46.01 | 32.79 | 28.32 | 24.44 |
| 6872 | 47.58 | 45.99 | 32.78 | 28.31 | 24.44 |
| 6874 | 47.59 | 45.98 | 32.8  | 28.32 | 24.46 |
| 6876 | 47.54 | 45.95 | 32.78 | 28.32 | 24.46 |
| 6878 | 47.49 | 45.91 | 32.74 | 28.28 | 24.42 |
| 6880 | 47.47 | 45.89 | 32.73 | 28.27 | 24.41 |
| 6882 | 47.44 | 45.87 | 32.73 | 28.26 | 24.42 |
| 6884 | 47.41 | 45.85 | 32.73 | 28.26 | 24.41 |
| 6886 | 47.4  | 45.84 | 32.74 | 28.28 | 24.44 |
| 6888 | 47.38 | 45.84 | 32.74 | 28.28 | 24.44 |
| 6890 | 47.31 | 45.77 | 32.67 | 28.21 | 24.37 |
| 6892 | 47.35 | 45.81 | 32.73 | 28.29 | 24.43 |
| 6894 | 47.3  | 45.79 | 32.72 | 28.28 | 24.43 |
| 6896 | 47.29 | 45.79 | 32.73 | 28.28 | 24.43 |
| 6898 | 47.29 | 45.78 | 32.75 | 28.31 | 24.45 |
| 6900 | 47.25 | 45.75 | 32.72 | 28.28 | 24.44 |
| 6902 | 47.25 | 45.75 | 32.74 | 28.27 | 24.43 |
| 6904 | 47.19 | 45.7  | 32.7  | 28.25 | 24.41 |
| 6906 | 47.15 | 45.67 | 32.68 | 28.24 | 24.4  |
| 6908 | 47.14 | 45.68 | 32.7  | 28.26 | 24.44 |
| 6910 | 47.13 | 45.67 | 32.7  | 28.28 | 24.45 |
| 6912 | 47.09 | 45.63 | 32.67 | 28.25 | 24.42 |
| 6914 | 47.09 | 45.64 | 32.7  | 28.27 | 24.43 |
| 6916 | 47.06 | 45.62 | 32.69 | 28.25 | 24.42 |
| 6918 | 46.99 | 45.55 | 32.65 | 28.21 | 24.39 |
| 6920 | 47    | 45.57 | 32.67 | 28.24 | 24.42 |

|      |       |       |       |       |       |
|------|-------|-------|-------|-------|-------|
| 6922 | 46.97 | 45.55 | 32.66 | 28.24 | 24.42 |
| 6924 | 46.93 | 45.52 | 32.64 | 28.21 | 24.39 |
| 6926 | 46.9  | 45.49 | 32.63 | 28.2  | 24.38 |
| 6928 | 46.88 | 45.48 | 32.64 | 28.22 | 24.4  |
| 6930 | 46.87 | 45.49 | 32.65 | 28.23 | 24.42 |
| 6932 | 46.83 | 45.45 | 32.62 | 28.2  | 24.39 |
| 6934 | 46.83 | 45.45 | 32.63 | 28.23 | 24.41 |
| 6936 | 46.78 | 45.42 | 32.61 | 28.21 | 24.4  |
| 6938 | 46.74 | 45.39 | 32.61 | 28.2  | 24.4  |
| 6940 | 46.73 | 45.39 | 32.62 | 28.2  | 24.4  |
| 6942 | 46.72 | 45.38 | 32.61 | 28.2  | 24.41 |
| 6944 | 46.67 | 45.33 | 32.58 | 28.18 | 24.39 |
| 6946 | 46.68 | 45.36 | 32.62 | 28.22 | 24.41 |
| 6948 | 46.64 | 45.33 | 32.61 | 28.22 | 24.42 |
| 6950 | 46.61 | 45.29 | 32.59 | 28.19 | 24.4  |
| 6952 | 46.56 | 45.26 | 32.56 | 28.16 | 24.37 |
| 6954 | 46.54 | 45.25 | 32.56 | 28.15 | 24.37 |
| 6956 | 46.51 | 45.22 | 32.55 | 28.15 | 24.36 |
| 6958 | 46.5  | 45.21 | 32.55 | 28.15 | 24.36 |
| 6960 | 46.47 | 45.19 | 32.54 | 28.15 | 24.35 |
| 6962 | 46.45 | 45.18 | 32.53 | 28.15 | 24.35 |
| 6964 | 46.42 | 45.16 | 32.53 | 28.14 | 24.35 |
| 6966 | 46.42 | 45.15 | 32.54 | 28.16 | 24.36 |
| 6968 | 46.37 | 45.12 | 32.52 | 28.14 | 24.35 |
| 6970 | 46.34 | 45.11 | 32.52 | 28.14 | 24.34 |
| 6972 | 46.33 | 45.09 | 32.52 | 28.13 | 24.35 |
| 6974 | 46.3  | 45.07 | 32.51 | 28.13 | 24.35 |
| 6976 | 46.27 | 45.05 | 32.5  | 28.12 | 24.34 |
| 6978 | 46.25 | 45.04 | 32.5  | 28.11 | 24.35 |
| 6980 | 46.22 | 45.01 | 32.49 | 28.11 | 24.34 |
| 6982 | 46.19 | 45    | 32.48 | 28.11 | 24.34 |
| 6984 | 46.12 | 44.93 | 32.44 | 28.08 | 24.32 |
| 6986 | 46.12 | 44.94 | 32.44 | 28.07 | 24.31 |
| 6988 | 46.12 | 44.95 | 32.47 | 28.09 | 24.34 |
| 6990 | 46.09 | 44.93 | 32.46 | 28.1  | 24.33 |
| 6992 | 46.06 | 44.9  | 32.45 | 28.09 | 24.32 |
| 6994 | 46.04 | 44.9  | 32.45 | 28.08 | 24.33 |
| 6996 | 46.01 | 44.88 | 32.45 | 28.08 | 24.33 |
| 6998 | 45.99 | 44.86 | 32.44 | 28.08 | 24.33 |
| 7000 | 45.97 | 44.85 | 32.44 | 28.08 | 24.33 |
| 7002 | 45.95 | 44.84 | 32.43 | 28.09 | 24.32 |
| 7004 | 45.93 | 44.82 | 32.43 | 28.08 | 24.32 |
| 7006 | 45.95 | 44.85 | 32.48 | 28.11 | 24.36 |
| 7008 | 45.88 | 44.78 | 32.43 | 28.08 | 24.33 |

|      |       |       |       |       |       |
|------|-------|-------|-------|-------|-------|
| 7010 | 45.85 | 44.77 | 32.42 | 28.07 | 24.32 |
| 7012 | 45.83 | 44.75 | 32.42 | 28.07 | 24.32 |
| 7014 | 45.79 | 44.71 | 32.38 | 28.04 | 24.29 |
| 7016 | 45.77 | 44.7  | 32.4  | 28.05 | 24.31 |
| 7018 | 45.75 | 44.69 | 32.4  | 28.06 | 24.32 |
| 7020 | 45.74 | 44.7  | 32.41 | 28.07 | 24.34 |
| 7022 | 45.7  | 44.66 | 32.4  | 28.05 | 24.32 |
| 7024 | 45.68 | 44.66 | 32.41 | 28.06 | 24.33 |
| 7026 | 45.67 | 44.65 | 32.4  | 28.06 | 24.33 |
| 7028 | 45.67 | 44.65 | 32.41 | 28.07 | 24.35 |
| 7030 | 45.62 | 44.61 | 32.39 | 28.05 | 24.32 |
| 7032 | 45.59 | 44.6  | 32.39 | 28.04 | 24.31 |
| 7034 | 45.57 | 44.58 | 32.38 | 28.05 | 24.32 |
| 7036 | 45.54 | 44.55 | 32.37 | 28.04 | 24.32 |
| 7038 | 45.52 | 44.54 | 32.38 | 28.05 | 24.32 |
| 7040 | 45.53 | 44.55 | 32.39 | 28.06 | 24.34 |
| 7042 | 45.53 | 44.56 | 32.4  | 28.08 | 24.37 |
| 7044 | 45.5  | 44.55 | 32.41 | 28.08 | 24.36 |
| 7046 | 45.46 | 44.52 | 32.4  | 28.07 | 24.34 |
| 7048 | 45.45 | 44.51 | 32.39 | 28.07 | 24.35 |
| 7050 | 45.41 | 44.47 | 32.36 | 28.04 | 24.34 |
| 7052 | 45.39 | 44.46 | 32.37 | 28.06 | 24.36 |
| 7054 | 45.37 | 44.45 | 32.38 | 28.06 | 24.36 |
| 7056 | 45.35 | 44.45 | 32.38 | 28.06 | 24.36 |
| 7058 | 45.28 | 44.37 | 32.32 | 28.03 | 24.33 |
| 7060 | 45.27 | 44.37 | 32.32 | 28.01 | 24.32 |
| 7062 | 45.23 | 44.35 | 32.32 | 28    | 24.31 |
| 7064 | 45.23 | 44.35 | 32.34 | 28.01 | 24.33 |
| 7066 | 45.19 | 44.32 | 32.31 | 28    | 24.3  |
| 7068 | 45.16 | 44.29 | 32.3  | 27.99 | 24.3  |
| 7070 | 45.14 | 44.28 | 32.31 | 28    | 24.31 |
| 7072 | 45.13 | 44.29 | 32.31 | 28.02 | 24.33 |
| 7074 | 45.09 | 44.25 | 32.29 | 27.98 | 24.3  |
| 7076 | 45.06 | 44.23 | 32.27 | 27.98 | 24.29 |
| 7078 | 45.04 | 44.21 | 32.26 | 27.97 | 24.28 |
| 7080 | 45.01 | 44.19 | 32.25 | 27.97 | 24.28 |
| 7082 | 45.02 | 44.18 | 32.26 | 27.98 | 24.28 |
| 7084 | 45.03 | 44.21 | 32.3  | 28.02 | 24.33 |
| 7086 | 44.99 | 44.17 | 32.27 | 27.99 | 24.3  |
| 7088 | 44.94 | 44.14 | 32.26 | 27.97 | 24.29 |
| 7090 | 44.94 | 44.14 | 32.27 | 27.98 | 24.3  |
| 7092 | 44.88 | 44.1  | 32.24 | 27.96 | 24.28 |
| 7094 | 44.87 | 44.09 | 32.25 | 27.96 | 24.29 |
| 7096 | 44.83 | 44.06 | 32.23 | 27.95 | 24.27 |



|      |       |       |       |       |       |
|------|-------|-------|-------|-------|-------|
| 7098 | 44.82 | 44.05 | 32.23 | 27.96 | 24.26 |
| 7100 | 44.84 | 44.08 | 32.27 | 27.99 | 24.32 |
| 7102 | 44.8  | 44.05 | 32.24 | 27.97 | 24.29 |
| 7104 | 44.78 | 44.04 | 32.25 | 27.98 | 24.3  |
| 7106 | 44.73 | 43.99 | 32.21 | 27.95 | 24.28 |
| 7108 | 44.7  | 43.97 | 32.2  | 27.94 | 24.27 |
| 7110 | 44.68 | 43.96 | 32.2  | 27.94 | 24.28 |
| 7112 | 44.67 | 43.95 | 32.21 | 27.94 | 24.29 |
| 7114 | 44.63 | 43.92 | 32.2  | 27.93 | 24.26 |
| 7116 | 44.6  | 43.9  | 32.17 | 27.91 | 24.27 |
| 7118 | 44.61 | 43.92 | 32.2  | 27.94 | 24.29 |
| 7120 | 44.58 | 43.89 | 32.19 | 27.93 | 24.28 |
| 7122 | 44.53 | 43.84 | 32.16 | 27.9  | 24.25 |
| 7124 | 44.52 | 43.84 | 32.16 | 27.89 | 24.27 |
| 7126 | 44.49 | 43.82 | 32.15 | 27.89 | 24.25 |
| 7128 | 44.51 | 43.84 | 32.18 | 27.93 | 24.28 |
| 7130 | 44.47 | 43.81 | 32.17 | 27.92 | 24.26 |
| 7132 | 44.43 | 43.78 | 32.15 | 27.89 | 24.26 |
| 7134 | 44.41 | 43.76 | 32.13 | 27.89 | 24.26 |
| 7136 | 44.4  | 43.76 | 32.16 | 27.92 | 24.28 |
| 7138 | 44.36 | 43.73 | 32.13 | 27.89 | 24.26 |
| 7140 | 44.38 | 43.76 | 32.17 | 27.93 | 24.3  |
| 7142 | 44.33 | 43.72 | 32.13 | 27.88 | 24.25 |
| 7144 | 44.3  | 43.69 | 32.13 | 27.89 | 24.26 |
| 7146 | 44.27 | 43.66 | 32.12 | 27.87 | 24.23 |
| 7148 | 44.28 | 43.68 | 32.14 | 27.9  | 24.28 |
| 7150 | 44.27 | 43.68 | 32.14 | 27.9  | 24.29 |
| 7152 | 44.23 | 43.65 | 32.13 | 27.89 | 24.25 |
| 7154 | 44.22 | 43.65 | 32.14 | 27.9  | 24.28 |
| 7156 | 44.21 | 43.64 | 32.14 | 27.92 | 24.28 |
| 7158 | 44.19 | 43.63 | 32.14 | 27.92 | 24.28 |
| 7160 | 44.14 | 43.61 | 32.13 | 27.91 | 24.27 |
| 7162 | 44.13 | 43.58 | 32.11 | 27.89 | 24.26 |
| 7164 | 44.13 | 43.58 | 32.13 | 27.89 | 24.27 |
| 7166 | 44.09 | 43.54 | 32.1  | 27.87 | 24.26 |
| 7168 | 44.04 | 43.5  | 32.07 | 27.85 | 24.23 |
| 7170 | 44.02 | 43.49 | 32.07 | 27.86 | 24.24 |
| 7172 | 43.98 | 43.46 | 32.05 | 27.83 | 24.21 |
| 7174 | 43.98 | 43.46 | 32.06 | 27.85 | 24.24 |
| 7176 | 43.98 | 43.46 | 32.08 | 27.87 | 24.26 |
| 7178 | 43.95 | 43.45 | 32.08 | 27.87 | 24.26 |
| 7180 | 43.94 | 43.45 | 32.08 | 27.88 | 24.27 |
| 7182 | 43.88 | 43.4  | 32.04 | 27.83 | 24.24 |
| 7184 | 43.88 | 43.4  | 32.06 | 27.84 | 24.25 |

|      |       |       |       |       |       |
|------|-------|-------|-------|-------|-------|
| 7186 | 43.81 | 43.34 | 32.02 | 27.81 | 24.21 |
| 7188 | 43.82 | 43.36 | 32.03 | 27.83 | 24.25 |
| 7190 | 43.82 | 43.37 | 32.05 | 27.85 | 24.26 |
| 7192 | 43.8  | 43.35 | 32.05 | 27.85 | 24.26 |
| 7194 | 43.78 | 43.34 | 32.05 | 27.85 | 24.27 |
| 7196 | 43.76 | 43.32 | 32.04 | 27.84 | 24.27 |
| 7198 | 43.73 | 43.3  | 32.04 | 27.84 | 24.26 |
| 7200 | 43.69 | 43.28 | 32.02 | 27.81 | 24.22 |
| 7202 | 43.66 | 43.24 | 31.99 | 27.8  | 24.21 |
| 7204 | 43.62 | 43.21 | 31.98 | 27.78 | 24.2  |
| 7206 | 43.61 | 43.21 | 31.97 | 27.79 | 24.21 |
| 7208 | 43.6  | 43.2  | 31.99 | 27.81 | 24.22 |
| 7210 | 43.62 | 43.22 | 32.02 | 27.84 | 24.25 |
| 7212 | 43.58 | 43.2  | 32.01 | 27.83 | 24.23 |
| 7214 | 43.57 | 43.19 | 32.01 | 27.84 | 24.25 |
| 7216 | 43.53 | 43.15 | 31.98 | 27.81 | 24.22 |
| 7218 | 43.53 | 43.16 | 32    | 27.83 | 24.24 |
| 7220 | 43.48 | 43.11 | 31.96 | 27.78 | 24.21 |
| 7222 | 43.48 | 43.13 | 31.98 | 27.82 | 24.24 |
| 7224 | 43.41 | 43.06 | 31.94 | 27.76 | 24.18 |
| 7226 | 43.38 | 43.04 | 31.92 | 27.76 | 24.18 |
| 7228 | 43.42 | 43.08 | 31.97 | 27.81 | 24.24 |
| 7230 | 43.38 | 43.05 | 31.96 | 27.79 | 24.22 |
| 7232 | 43.35 | 43.02 | 31.93 | 27.77 | 24.19 |
| 7234 | 43.3  | 42.98 | 31.91 | 27.74 | 24.18 |
| 7236 | 43.3  | 42.99 | 31.93 | 27.77 | 24.21 |
| 7238 | 43.31 | 43.01 | 31.95 | 27.79 | 24.23 |
| 7240 | 43.24 | 42.94 | 31.9  | 27.73 | 24.18 |
| 7242 | 43.2  | 42.91 | 31.88 | 27.73 | 24.17 |
| 7244 | 43.19 | 42.91 | 31.88 | 27.73 | 24.18 |
| 7246 | 43.17 | 42.9  | 31.89 | 27.73 | 24.18 |
| 7248 | 43.16 | 42.89 | 31.89 | 27.74 | 24.18 |
| 7250 | 43.13 | 42.86 | 31.87 | 27.71 | 24.18 |
| 7252 | 43.12 | 42.86 | 31.88 | 27.73 | 24.17 |
| 7254 | 43.1  | 42.84 | 31.87 | 27.71 | 24.17 |
| 7256 | 43.08 | 42.83 | 31.88 | 27.73 | 24.18 |
| 7258 | 43.06 | 42.82 | 31.88 | 27.74 | 24.19 |
| 7260 | 43.04 | 42.8  | 31.86 | 27.71 | 24.17 |
| 7262 | 43.01 | 42.78 | 31.85 | 27.72 | 24.18 |
| 7264 | 42.97 | 42.76 | 31.83 | 27.7  | 24.16 |
| 7266 | 42.95 | 42.73 | 31.83 | 27.69 | 24.16 |
| 7268 | 42.93 | 42.73 | 31.83 | 27.7  | 24.16 |
| 7270 | 42.92 | 42.71 | 31.83 | 27.7  | 24.16 |
| 7272 | 42.9  | 42.7  | 31.83 | 27.69 | 24.16 |

|      |       |       |       |       |       |
|------|-------|-------|-------|-------|-------|
| 7274 | 42.88 | 42.69 | 31.82 | 27.7  | 24.15 |
| 7276 | 42.9  | 42.69 | 31.84 | 27.72 | 24.18 |
| 7278 | 42.88 | 42.69 | 31.85 | 27.72 | 24.19 |
| 7280 | 42.89 | 42.71 | 31.88 | 27.75 | 24.22 |
| 7282 | 42.81 | 42.65 | 31.83 | 27.7  | 24.16 |
| 7284 | 42.83 | 42.66 | 31.84 | 27.71 | 24.18 |
| 7286 | 42.82 | 42.65 | 31.85 | 27.73 | 24.2  |
| 7288 | 42.74 | 42.6  | 31.81 | 27.69 | 24.16 |
| 7290 | 42.72 | 42.57 | 31.8  | 27.67 | 24.15 |
| 7292 | 42.73 | 42.6  | 31.82 | 27.7  | 24.2  |
| 7294 | 42.73 | 42.59 | 31.82 | 27.71 | 24.19 |
| 7296 | 42.66 | 42.53 | 31.79 | 27.67 | 24.15 |
| 7298 | 42.64 | 42.52 | 31.78 | 27.68 | 24.17 |
| 7300 | 42.63 | 42.51 | 31.78 | 27.68 | 24.16 |
| 7302 | 42.61 | 42.49 | 31.78 | 27.67 | 24.15 |
| 7304 | 42.61 | 42.5  | 31.78 | 27.68 | 24.16 |
| 7306 | 42.61 | 42.52 | 31.82 | 27.71 | 24.2  |
| 7308 | 42.6  | 42.51 | 31.81 | 27.71 | 24.2  |
| 7310 | 42.58 | 42.49 | 31.8  | 27.71 | 24.2  |
| 7312 | 42.54 | 42.45 | 31.79 | 27.7  | 24.18 |
| 7314 | 42.54 | 42.44 | 31.79 | 27.7  | 24.19 |
| 7316 | 42.47 | 42.39 | 31.75 | 27.67 | 24.16 |
| 7318 | 42.45 | 42.39 | 31.75 | 27.66 | 24.16 |
| 7320 | 42.45 | 42.39 | 31.77 | 27.67 | 24.16 |
| 7322 | 42.44 | 42.37 | 31.76 | 27.65 | 24.16 |
| 7324 | 42.4  | 42.35 | 31.74 | 27.64 | 24.15 |
| 7326 | 42.38 | 42.33 | 31.74 | 27.63 | 24.15 |
| 7328 | 42.34 | 42.32 | 31.73 | 27.64 | 24.16 |
| 7330 | 42.35 | 42.32 | 31.74 | 27.66 | 24.17 |
| 7332 | 42.31 | 42.29 | 31.73 | 27.65 | 24.16 |
| 7334 | 42.29 | 42.27 | 31.72 | 27.63 | 24.14 |
| 7336 | 42.27 | 42.26 | 31.72 | 27.63 | 24.15 |
| 7338 | 42.25 | 42.25 | 31.73 | 27.64 | 24.15 |
| 7340 | 42.23 | 42.23 | 31.71 | 27.63 | 24.14 |
| 7342 | 42.24 | 42.25 | 31.73 | 27.66 | 24.16 |
| 7344 | 42.18 | 42.19 | 31.69 | 27.63 | 24.13 |
| 7346 | 42.18 | 42.2  | 31.7  | 27.64 | 24.14 |
| 7348 | 42.18 | 42.19 | 31.71 | 27.64 | 24.17 |
| 7350 | 42.14 | 42.16 | 31.69 | 27.62 | 24.13 |
| 7352 | 42.1  | 42.14 | 31.68 | 27.61 | 24.14 |
| 7354 | 42.1  | 42.12 | 31.67 | 27.6  | 24.13 |
| 7356 | 42.06 | 42.1  | 31.66 | 27.59 | 24.11 |
| 7358 | 42.05 | 42.11 | 31.67 | 27.6  | 24.13 |
| 7360 | 42.02 | 42.08 | 31.64 | 27.57 | 24.11 |

|      |       |       |       |       |       |
|------|-------|-------|-------|-------|-------|
| 7362 | 42.02 | 42.08 | 31.67 | 27.59 | 24.12 |
| 7364 | 41.99 | 42.04 | 31.64 | 27.58 | 24.1  |
| 7366 | 41.98 | 42.04 | 31.65 | 27.59 | 24.11 |
| 7368 | 41.97 | 42.04 | 31.64 | 27.6  | 24.13 |
| 7370 | 41.94 | 42.02 | 31.66 | 27.6  | 24.12 |
| 7372 | 41.92 | 42.02 | 31.65 | 27.6  | 24.12 |
| 7374 | 41.93 | 42.03 | 31.66 | 27.61 | 24.14 |
| 7376 | 41.91 | 42    | 31.66 | 27.6  | 24.13 |
| 7378 | 41.87 | 41.98 | 31.64 | 27.59 | 24.14 |
| 7380 | 41.85 | 41.96 | 31.62 | 27.57 | 24.12 |
| 7382 | 41.8  | 41.92 | 31.59 | 27.56 | 24.1  |
| 7384 | 41.81 | 41.93 | 31.61 | 27.57 | 24.11 |
| 7386 | 41.76 | 41.9  | 31.61 | 27.55 | 24.09 |
| 7388 | 41.76 | 41.89 | 31.61 | 27.56 | 24.11 |
| 7390 | 41.74 | 41.87 | 31.6  | 27.56 | 24.12 |
| 7392 | 41.76 | 41.89 | 31.63 | 27.59 | 24.14 |
| 7394 | 41.7  | 41.86 | 31.6  | 27.57 | 24.1  |
| 7396 | 41.68 | 41.83 | 31.58 | 27.55 | 24.09 |
| 7398 | 41.69 | 41.85 | 31.6  | 27.59 | 24.12 |
| 7400 | 41.65 | 41.81 | 31.59 | 27.56 | 24.11 |
| 7402 | 41.61 | 41.78 | 31.56 | 27.53 | 24.08 |
| 7404 | 41.62 | 41.78 | 31.58 | 27.56 | 24.11 |
| 7406 | 41.57 | 41.75 | 31.55 | 27.53 | 24.08 |
| 7408 | 41.54 | 41.72 | 31.53 | 27.5  | 24.06 |
| 7410 | 41.51 | 41.71 | 31.53 | 27.5  | 24.06 |
| 7412 | 41.5  | 41.69 | 31.53 | 27.52 | 24.07 |
| 7414 | 41.5  | 41.7  | 31.54 | 27.53 | 24.09 |
| 7416 | 41.45 | 41.67 | 31.51 | 27.49 | 24.05 |
| 7418 | 41.44 | 41.65 | 31.51 | 27.49 | 24.06 |
| 7420 | 41.45 | 41.66 | 31.53 | 27.5  | 24.07 |
| 7422 | 41.46 | 41.69 | 31.56 | 27.55 | 24.11 |
| 7424 | 41.45 | 41.66 | 31.56 | 27.54 | 24.1  |
| 7426 | 41.41 | 41.64 | 31.53 | 27.51 | 24.08 |
| 7428 | 41.37 | 41.61 | 31.5  | 27.49 | 24.05 |
| 7430 | 41.35 | 41.58 | 31.49 | 27.49 | 24.05 |
| 7432 | 41.35 | 41.59 | 31.5  | 27.5  | 24.06 |
| 7434 | 41.31 | 41.56 | 31.49 | 27.49 | 24.05 |
| 7436 | 41.28 | 41.54 | 31.48 | 27.47 | 24.05 |
| 7438 | 41.26 | 41.52 | 31.47 | 27.47 | 24.05 |
| 7440 | 41.24 | 41.51 | 31.46 | 27.46 | 24.05 |
| 7442 | 41.22 | 41.5  | 31.47 | 27.47 | 24.05 |
| 7444 | 41.2  | 41.49 | 31.46 | 27.47 | 24.04 |
| 7446 | 41.2  | 41.48 | 31.47 | 27.47 | 24.06 |
| 7448 | 41.21 | 41.49 | 31.49 | 27.49 | 24.07 |

|      |       |       |       |       |       |
|------|-------|-------|-------|-------|-------|
| 7450 | 41.16 | 41.45 | 31.46 | 27.47 | 24.06 |
| 7452 | 41.14 | 41.43 | 31.45 | 27.45 | 24.04 |
| 7454 | 41.12 | 41.43 | 31.47 | 27.47 | 24.06 |
| 7456 | 41.15 | 41.45 | 31.49 | 27.51 | 24.1  |
| 7458 | 41.12 | 41.42 | 31.46 | 27.47 | 24.06 |
| 7460 | 41.1  | 41.42 | 31.48 | 27.49 | 24.08 |
| 7462 | 41.06 | 41.37 | 31.44 | 27.45 | 24.05 |
| 7464 | 41.05 | 41.39 | 31.45 | 27.47 | 24.06 |
| 7466 | 41    | 41.33 | 31.41 | 27.44 | 24.01 |
| 7468 | 41    | 41.33 | 31.42 | 27.46 | 24.05 |
| 7470 | 41.02 | 41.34 | 31.44 | 27.46 | 24.06 |
| 7472 | 40.97 | 41.3  | 31.41 | 27.44 | 24.03 |
| 7474 | 40.95 | 41.3  | 31.42 | 27.45 | 24.05 |
| 7476 | 40.94 | 41.3  | 31.43 | 27.45 | 24.05 |
| 7478 | 40.92 | 41.28 | 31.41 | 27.44 | 24.04 |
| 7480 | 40.88 | 41.24 | 31.39 | 27.41 | 24.03 |
| 7482 | 40.89 | 41.26 | 31.42 | 27.44 | 24.07 |
| 7484 | 40.88 | 41.25 | 31.41 | 27.43 | 24.04 |
| 7486 | 40.86 | 41.23 | 31.41 | 27.44 | 24.05 |
| 7488 | 40.82 | 41.2  | 31.39 | 27.43 | 24.04 |
| 7490 | 40.81 | 41.19 | 31.39 | 27.43 | 24.04 |
| 7492 | 40.8  | 41.19 | 31.4  | 27.43 | 24.05 |
| 7494 | 40.8  | 41.19 | 31.41 | 27.44 | 24.06 |
| 7496 | 40.76 | 41.17 | 31.4  | 27.43 | 24.06 |
| 7498 | 40.73 | 41.14 | 31.38 | 27.41 | 24.04 |
| 7500 | 40.71 | 41.13 | 31.37 | 27.41 | 24.03 |
| 7502 | 40.72 | 41.14 | 31.39 | 27.43 | 24.07 |
| 7504 | 40.71 | 41.13 | 31.41 | 27.45 | 24.07 |
| 7506 | 40.66 | 41.09 | 31.36 | 27.4  | 24.04 |
| 7508 | 40.64 | 41.07 | 31.35 | 27.4  | 24.02 |
| 7510 | 40.62 | 41.06 | 31.34 | 27.4  | 24.01 |
| 7512 | 40.61 | 41.05 | 31.34 | 27.39 | 24.01 |
| 7514 | 40.62 | 41.06 | 31.36 | 27.42 | 24.04 |
| 7516 | 40.6  | 41.04 | 31.36 | 27.4  | 24.02 |
| 7518 | 40.56 | 41.01 | 31.33 | 27.39 | 24.01 |
| 7520 | 40.56 | 41.02 | 31.35 | 27.4  | 24.03 |
| 7522 | 40.52 | 40.99 | 31.33 | 27.39 | 24.01 |
| 7524 | 40.53 | 41    | 31.35 | 27.4  | 24.03 |
| 7526 | 40.5  | 40.98 | 31.34 | 27.41 | 24.05 |
| 7528 | 40.49 | 40.97 | 31.33 | 27.4  | 24.04 |
| 7530 | 40.49 | 40.97 | 31.34 | 27.4  | 24.05 |
| 7532 | 40.46 | 40.95 | 31.32 | 27.39 | 24.04 |
| 7534 | 40.4  | 40.9  | 31.28 | 27.36 | 24    |
| 7536 | 40.42 | 40.92 | 31.33 | 27.4  | 24.04 |

|      |       |       |       |       |       |
|------|-------|-------|-------|-------|-------|
| 7538 | 40.39 | 40.89 | 31.3  | 27.38 | 24.04 |
| 7540 | 40.34 | 40.85 | 31.27 | 27.35 | 24    |
| 7542 | 40.36 | 40.87 | 31.29 | 27.37 | 24.01 |
| 7544 | 40.37 | 40.88 | 31.31 | 27.39 | 24.03 |
| 7546 | 40.35 | 40.87 | 31.31 | 27.39 | 24.03 |
| 7548 | 40.3  | 40.82 | 31.27 | 27.35 | 24.01 |
| 7550 | 40.27 | 40.8  | 31.27 | 27.35 | 24    |
| 7552 | 40.28 | 40.82 | 31.3  | 27.37 | 24.01 |
| 7554 | 40.25 | 40.78 | 31.27 | 27.34 | 24    |
| 7556 | 40.24 | 40.78 | 31.28 | 27.35 | 24.01 |
| 7558 | 40.24 | 40.79 | 31.29 | 27.38 | 24.04 |
| 7560 | 40.18 | 40.75 | 31.26 | 27.34 | 24    |
| 7562 | 40.16 | 40.72 | 31.24 | 27.33 | 24    |
| 7564 | 40.15 | 40.7  | 31.24 | 27.34 | 24.01 |
| 7566 | 40.15 | 40.71 | 31.25 | 27.34 | 24.01 |
| 7568 | 40.14 | 40.72 | 31.28 | 27.36 | 24.03 |
| 7570 | 40.14 | 40.71 | 31.27 | 27.36 | 24.03 |
| 7572 | 40.12 | 40.7  | 31.27 | 27.37 | 24.04 |
| 7574 | 40.11 | 40.7  | 31.27 | 27.36 | 24.04 |
| 7576 | 40.08 | 40.68 | 31.26 | 27.35 | 24.01 |
| 7578 | 40.09 | 40.68 | 31.26 | 27.37 | 24.02 |
| 7580 | 40.03 | 40.63 | 31.22 | 27.33 | 23.99 |
| 7582 | 39.99 | 40.59 | 31.2  | 27.31 | 23.97 |
| 7584 | 39.99 | 40.59 | 31.21 | 27.32 | 23.99 |
| 7586 | 39.96 | 40.57 | 31.19 | 27.3  | 23.97 |
| 7588 | 39.95 | 40.56 | 31.19 | 27.31 | 23.98 |
| 7590 | 39.92 | 40.54 | 31.18 | 27.29 | 23.96 |
| 7592 | 39.91 | 40.53 | 31.18 | 27.28 | 23.96 |
| 7594 | 39.89 | 40.52 | 31.17 | 27.29 | 23.96 |
| 7596 | 39.87 | 40.5  | 31.17 | 27.29 | 23.96 |
| 7598 | 39.84 | 40.47 | 31.14 | 27.25 | 23.92 |
| 7600 | 39.83 | 40.46 | 31.15 | 27.26 | 23.95 |
| 7602 | 39.8  | 40.45 | 31.15 | 27.27 | 23.96 |
| 7604 | 39.79 | 40.44 | 31.14 | 27.26 | 23.95 |
| 7606 | 39.78 | 40.43 | 31.14 | 27.26 | 23.95 |
| 7608 | 39.76 | 40.42 | 31.13 | 27.26 | 23.96 |
| 7610 | 39.73 | 40.39 | 31.13 | 27.26 | 23.96 |
| 7612 | 39.72 | 40.39 | 31.12 | 27.25 | 23.95 |
| 7614 | 39.72 | 40.38 | 31.13 | 27.26 | 23.95 |
| 7616 | 39.7  | 40.37 | 31.12 | 27.25 | 23.95 |
| 7618 | 39.68 | 40.36 | 31.12 | 27.25 | 23.95 |
| 7620 | 39.7  | 40.38 | 31.16 | 27.3  | 23.99 |
| 7622 | 39.72 | 40.4  | 31.18 | 27.32 | 24.01 |
| 7624 | 39.69 | 40.38 | 31.17 | 27.31 | 23.98 |

|      |       |       |       |       |       |
|------|-------|-------|-------|-------|-------|
| 7626 | 39.69 | 40.38 | 31.17 | 27.31 | 24    |
| 7628 | 39.68 | 40.37 | 31.17 | 27.32 | 24.01 |
| 7630 | 39.66 | 40.36 | 31.17 | 27.31 | 24.01 |
| 7632 | 39.63 | 40.34 | 31.15 | 27.3  | 23.99 |
| 7634 | 39.58 | 40.3  | 31.13 | 27.27 | 23.96 |
| 7636 | 39.59 | 40.31 | 31.15 | 27.3  | 23.99 |
| 7638 | 39.58 | 40.3  | 31.15 | 27.3  | 24.01 |
| 7640 | 39.53 | 40.27 | 31.12 | 27.28 | 23.99 |
| 7642 | 39.47 | 40.19 | 31.07 | 27.21 | 23.92 |
| 7644 | 39.47 | 40.2  | 31.07 | 27.22 | 23.94 |
| 7646 | 39.46 | 40.21 | 31.09 | 27.24 | 23.96 |
| 7648 | 39.47 | 40.2  | 31.09 | 27.24 | 23.97 |
| 7650 | 39.42 | 40.17 | 31.07 | 27.22 | 23.95 |
| 7652 | 39.42 | 40.18 | 31.09 | 27.25 | 23.97 |
| 7654 | 39.45 | 40.2  | 31.11 | 27.27 | 23.98 |
| 7656 | 39.4  | 40.17 | 31.08 | 27.25 | 23.96 |
| 7658 | 39.4  | 40.17 | 31.1  | 27.27 | 23.97 |
| 7660 | 39.38 | 40.15 | 31.09 | 27.25 | 23.97 |
| 7662 | 39.36 | 40.14 | 31.08 | 27.25 | 23.97 |
| 7664 | 39.35 | 40.13 | 31.09 | 27.26 | 23.98 |
| 7666 | 39.35 | 40.13 | 31.11 | 27.27 | 23.99 |
| 7668 | 39.33 | 40.12 | 31.08 | 27.24 | 23.97 |
| 7670 | 39.28 | 40.08 | 31.07 | 27.23 | 23.95 |
| 7672 | 39.29 | 40.08 | 31.07 | 27.24 | 23.97 |
| 7674 | 39.26 | 40.06 | 31.06 | 27.23 | 23.96 |
| 7676 | 39.25 | 40.05 | 31.07 | 27.23 | 23.98 |
| 7678 | 39.21 | 40.02 | 31.04 | 27.21 | 23.95 |
| 7680 | 39.17 | 39.98 | 31.01 | 27.18 | 23.93 |
| 7682 | 39.16 | 39.98 | 31.02 | 27.19 | 23.94 |
| 7684 | 39.15 | 39.97 | 31.03 | 27.2  | 23.95 |
| 7686 | 39.18 | 40.01 | 31.06 | 27.24 | 23.98 |
| 7688 | 39.15 | 39.99 | 31.05 | 27.23 | 23.97 |
| 7690 | 39.15 | 39.99 | 31.05 | 27.23 | 23.98 |
| 7692 | 39.13 | 39.98 | 31.05 | 27.22 | 23.96 |
| 7694 | 39.11 | 39.95 | 31.03 | 27.21 | 23.96 |
| 7696 | 39.11 | 39.95 | 31.04 | 27.23 | 23.97 |
| 7698 | 39.06 | 39.91 | 31.01 | 27.21 | 23.94 |
| 7700 | 39.05 | 39.9  | 31.01 | 27.2  | 23.95 |
| 7702 | 39    | 39.86 | 30.98 | 27.17 | 23.92 |
| 7704 | 39.03 | 39.89 | 31.01 | 27.2  | 23.95 |
| 7706 | 39    | 39.87 | 31    | 27.19 | 23.93 |
| 7708 | 39.01 | 39.88 | 31.01 | 27.21 | 23.97 |
| 7710 | 38.96 | 39.83 | 30.98 | 27.17 | 23.93 |
| 7712 | 38.98 | 39.85 | 30.99 | 27.18 | 23.95 |

|      |       |       |       |       |       |
|------|-------|-------|-------|-------|-------|
| 7714 | 38.98 | 39.86 | 31.02 | 27.21 | 23.97 |
| 7716 | 38.94 | 39.83 | 31.01 | 27.19 | 23.96 |
| 7718 | 38.93 | 39.82 | 31    | 27.2  | 23.97 |
| 7720 | 38.89 | 39.77 | 30.96 | 27.15 | 23.92 |
| 7722 | 38.89 | 39.78 | 30.98 | 27.18 | 23.94 |
| 7724 | 38.87 | 39.77 | 30.97 | 27.18 | 23.94 |
| 7726 | 38.87 | 39.77 | 30.99 | 27.2  | 23.95 |
| 7728 | 38.85 | 39.74 | 30.96 | 27.18 | 23.95 |
| 7730 | 38.8  | 39.7  | 30.93 | 27.14 | 23.9  |
| 7732 | 38.78 | 39.69 | 30.92 | 27.14 | 23.9  |
| 7734 | 38.77 | 39.68 | 30.92 | 27.14 | 23.9  |
| 7736 | 38.73 | 39.65 | 30.91 | 27.12 | 23.89 |
| 7738 | 38.72 | 39.65 | 30.91 | 27.12 | 23.88 |
| 7740 | 38.7  | 39.62 | 30.89 | 27.09 | 23.88 |
| 7742 | 38.69 | 39.63 | 30.89 | 27.11 | 23.89 |
| 7744 | 38.72 | 39.64 | 30.92 | 27.14 | 23.92 |
| 7746 | 38.7  | 39.64 | 30.92 | 27.13 | 23.91 |
| 7748 | 38.71 | 39.65 | 30.94 | 27.16 | 23.94 |
| 7750 | 38.67 | 39.61 | 30.91 | 27.12 | 23.91 |
| 7752 | 38.63 | 39.58 | 30.88 | 27.12 | 23.9  |
| 7754 | 38.63 | 39.58 | 30.9  | 27.14 | 23.92 |
| 7756 | 38.62 | 39.57 | 30.9  | 27.12 | 23.89 |
| 7758 | 38.62 | 39.57 | 30.9  | 27.14 | 23.91 |
| 7760 | 38.6  | 39.56 | 30.9  | 27.13 | 23.91 |
| 7762 | 38.58 | 39.54 | 30.9  | 27.13 | 23.92 |
| 7764 | 38.55 | 39.51 | 30.87 | 27.11 | 23.88 |
| 7766 | 38.53 | 39.5  | 30.86 | 27.1  | 23.88 |
| 7768 | 38.51 | 39.49 | 30.86 | 27.09 | 23.88 |
| 7770 | 38.5  | 39.48 | 30.86 | 27.09 | 23.88 |
| 7772 | 38.47 | 39.45 | 30.85 | 27.08 | 23.87 |
| 7774 | 38.45 | 39.43 | 30.83 | 27.07 | 23.86 |
| 7776 | 38.44 | 39.43 | 30.84 | 27.07 | 23.88 |
| 7778 | 38.43 | 39.42 | 30.84 | 27.07 | 23.87 |
| 7780 | 38.42 | 39.41 | 30.83 | 27.07 | 23.88 |
| 7782 | 38.4  | 39.4  | 30.83 | 27.07 | 23.88 |
| 7784 | 38.39 | 39.39 | 30.83 | 27.07 | 23.87 |
| 7786 | 38.36 | 39.36 | 30.81 | 27.05 | 23.85 |
| 7788 | 38.36 | 39.36 | 30.81 | 27.06 | 23.87 |
| 7790 | 38.33 | 39.35 | 30.8  | 27.06 | 23.86 |
| 7792 | 38.34 | 39.35 | 30.8  | 27.05 | 23.86 |
| 7794 | 38.34 | 39.35 | 30.82 | 27.07 | 23.87 |
| 7796 | 38.31 | 39.32 | 30.8  | 27.05 | 23.87 |
| 7798 | 38.3  | 39.32 | 30.81 | 27.06 | 23.87 |
| 7800 | 38.26 | 39.28 | 30.77 | 27.04 | 23.84 |



|      |       |       |       |       |       |
|------|-------|-------|-------|-------|-------|
| 7802 | 38.26 | 39.3  | 30.8  | 27.07 | 23.86 |
| 7804 | 38.25 | 39.29 | 30.8  | 27.06 | 23.87 |
| 7806 | 38.23 | 39.28 | 30.79 | 27.05 | 23.87 |
| 7808 | 38.21 | 39.27 | 30.79 | 27.04 | 23.85 |
| 7810 | 38.18 | 39.23 | 30.76 | 27.03 | 23.84 |
| 7812 | 38.18 | 39.24 | 30.78 | 27.04 | 23.87 |
| 7814 | 38.17 | 39.23 | 30.77 | 27.04 | 23.86 |
| 7816 | 38.12 | 39.19 | 30.74 | 27.01 | 23.83 |
| 7818 | 38.13 | 39.2  | 30.76 | 27.03 | 23.86 |
| 7820 | 38.13 | 39.2  | 30.77 | 27.03 | 23.86 |
| 7822 | 38.16 | 39.23 | 30.81 | 27.08 | 23.91 |
| 7824 | 38.14 | 39.23 | 30.81 | 27.07 | 23.9  |
| 7826 | 38.14 | 39.21 | 30.81 | 27.08 | 23.9  |
| 7828 | 38.14 | 39.23 | 30.82 | 27.1  | 23.92 |
| 7830 | 38.11 | 39.19 | 30.8  | 27.07 | 23.89 |
| 7832 | 38.09 | 39.17 | 30.78 | 27.05 | 23.88 |
| 7834 | 38.07 | 39.17 | 30.8  | 27.08 | 23.9  |
| 7836 | 38.05 | 39.16 | 30.79 | 27.08 | 23.89 |
| 7838 | 38.05 | 39.15 | 30.79 | 27.07 | 23.89 |
| 7840 | 38.05 | 39.16 | 30.8  | 27.09 | 23.91 |
| 7842 | 37.99 | 39.1  | 30.75 | 27.03 | 23.87 |
| 7844 | 37.99 | 39.11 | 30.76 | 27.05 | 23.89 |
| 7846 | 37.98 | 39.1  | 30.75 | 27.04 | 23.88 |
| 7848 | 37.97 | 39.08 | 30.75 | 27.04 | 23.89 |
| 7850 | 37.97 | 39.09 | 30.77 | 27.06 | 23.9  |
| 7852 | 37.96 | 39.08 | 30.78 | 27.06 | 23.9  |
| 7854 | 37.93 | 39.06 | 30.75 | 27.04 | 23.88 |
| 7856 | 37.89 | 39.01 | 30.71 | 27.02 | 23.86 |
| 7858 | 37.89 | 39.04 | 30.74 | 27.04 | 23.88 |
| 7860 | 37.86 | 39.01 | 30.71 | 27.01 | 23.86 |
| 7862 | 37.84 | 38.98 | 30.7  | 27.02 | 23.85 |
| 7864 | 37.87 | 39.02 | 30.75 | 27.05 | 23.9  |
| 7866 | 37.86 | 39.02 | 30.76 | 27.05 | 23.91 |
| 7868 | 37.84 | 38.99 | 30.74 | 27.03 | 23.89 |
| 7870 | 37.82 | 38.99 | 30.74 | 27.04 | 23.89 |
| 7872 | 37.81 | 38.98 | 30.73 | 27.03 | 23.88 |
| 7874 | 37.75 | 38.93 | 30.71 | 27    | 23.85 |
| 7876 | 37.79 | 38.96 | 30.74 | 27.05 | 23.9  |
| 7878 | 37.79 | 38.97 | 30.75 | 27.05 | 23.9  |
| 7880 | 37.75 | 38.94 | 30.73 | 27.04 | 23.89 |
| 7882 | 37.75 | 38.94 | 30.73 | 27.05 | 23.9  |
| 7884 | 37.74 | 38.93 | 30.73 | 27.05 | 23.9  |
| 7886 | 37.71 | 38.9  | 30.7  | 27.03 | 23.87 |
| 7888 | 37.7  | 38.9  | 30.72 | 27.03 | 23.88 |

|      |       |       |       |       |       |
|------|-------|-------|-------|-------|-------|
| 7890 | 37.67 | 38.89 | 30.72 | 27.04 | 23.88 |
| 7892 | 37.65 | 38.86 | 30.69 | 27.01 | 23.89 |
| 7894 | 37.63 | 38.84 | 30.68 | 26.99 | 23.87 |
| 7896 | 37.62 | 38.83 | 30.68 | 27    | 23.88 |
| 7898 | 37.62 | 38.83 | 30.69 | 27.01 | 23.87 |
| 7900 | 37.6  | 38.83 | 30.69 | 27.01 | 23.87 |
| 7902 | 37.6  | 38.83 | 30.7  | 27.02 | 23.89 |
| 7904 | 37.55 | 38.79 | 30.67 | 26.99 | 23.87 |
| 7906 | 37.56 | 38.77 | 30.66 | 26.99 | 23.86 |
| 7908 | 37.57 | 38.8  | 30.68 | 27.02 | 23.89 |
| 7910 | 37.56 | 38.8  | 30.69 | 27.02 | 23.89 |
| 7912 | 37.55 | 38.78 | 30.69 | 27.02 | 23.89 |
| 7914 | 37.53 | 38.77 | 30.68 | 27.02 | 23.89 |
| 7916 | 37.52 | 38.77 | 30.68 | 27.01 | 23.89 |
| 7918 | 37.47 | 38.72 | 30.64 | 26.97 | 23.86 |
| 7920 | 37.49 | 38.73 | 30.66 | 27.01 | 23.88 |
| 7922 | 37.46 | 38.73 | 30.66 | 26.99 | 23.87 |
| 7924 | 37.43 | 38.69 | 30.64 | 26.98 | 23.87 |
| 7926 | 37.39 | 38.66 | 30.63 | 26.96 | 23.86 |
| 7928 | 37.39 | 38.66 | 30.65 | 26.98 | 23.85 |
| 7930 | 37.4  | 38.67 | 30.64 | 26.98 | 23.86 |
| 7932 | 37.36 | 38.64 | 30.62 | 26.97 | 23.85 |
| 7934 | 37.36 | 38.64 | 30.64 | 26.97 | 23.85 |
| 7936 | 37.33 | 38.63 | 30.61 | 26.96 | 23.85 |
| 7938 | 37.33 | 38.62 | 30.62 | 26.96 | 23.87 |
| 7940 | 37.33 | 38.61 | 30.62 | 26.98 | 23.87 |
| 7942 | 37.33 | 38.63 | 30.64 | 26.99 | 23.87 |
| 7944 | 37.31 | 38.6  | 30.62 | 26.96 | 23.85 |
| 7946 | 37.26 | 38.56 | 30.59 | 26.95 | 23.83 |
| 7948 | 37.23 | 38.54 | 30.57 | 26.93 | 23.81 |
| 7950 | 37.23 | 38.55 | 30.58 | 26.96 | 23.84 |
| 7952 | 37.19 | 38.51 | 30.56 | 26.92 | 23.81 |
| 7954 | 37.21 | 38.53 | 30.58 | 26.93 | 23.84 |
| 7956 | 37.19 | 38.51 | 30.58 | 26.93 | 23.85 |
| 7958 | 37.2  | 38.52 | 30.59 | 26.95 | 23.87 |
| 7960 | 37.2  | 38.52 | 30.6  | 26.96 | 23.86 |
| 7962 | 37.17 | 38.5  | 30.58 | 26.93 | 23.84 |
| 7964 | 37.12 | 38.46 | 30.55 | 26.91 | 23.83 |
| 7966 | 37.14 | 38.47 | 30.57 | 26.94 | 23.86 |
| 7968 | 37.15 | 38.48 | 30.59 | 26.95 | 23.87 |
| 7970 | 37.1  | 38.45 | 30.57 | 26.93 | 23.83 |
| 7972 | 37.12 | 38.47 | 30.59 | 26.95 | 23.84 |
| 7974 | 37.06 | 38.4  | 30.53 | 26.9  | 23.8  |
| 7976 | 37.09 | 38.44 | 30.56 | 26.92 | 23.83 |

|      |       |       |       |       |       |
|------|-------|-------|-------|-------|-------|
| 7978 | 37.04 | 38.39 | 30.53 | 26.9  | 23.81 |
| 7980 | 37.01 | 38.38 | 30.53 | 26.9  | 23.81 |
| 7982 | 36.99 | 38.36 | 30.51 | 26.9  | 23.79 |
| 7984 | 36.99 | 38.37 | 30.53 | 26.9  | 23.82 |
| 7986 | 36.97 | 38.34 | 30.52 | 26.9  | 23.82 |
| 7988 | 36.98 | 38.35 | 30.53 | 26.9  | 23.82 |
| 7990 | 36.98 | 38.35 | 30.53 | 26.9  | 23.83 |
| 7992 | 36.92 | 38.31 | 30.49 | 26.87 | 23.79 |
| 7994 | 36.93 | 38.31 | 30.5  | 26.88 | 23.8  |
| 7996 | 36.93 | 38.32 | 30.52 | 26.89 | 23.81 |
| 7998 | 36.91 | 38.31 | 30.51 | 26.89 | 23.82 |
| 8000 | 36.87 | 38.27 | 30.48 | 26.87 | 23.8  |
| 8002 | 36.86 | 38.25 | 30.47 | 26.87 | 23.77 |
| 8004 | 36.85 | 38.25 | 30.47 | 26.87 | 23.78 |
| 8006 | 36.82 | 38.23 | 30.46 | 26.85 | 23.77 |
| 8008 | 36.81 | 38.21 | 30.44 | 26.84 | 23.78 |
| 8010 | 36.81 | 38.2  | 30.44 | 26.83 | 23.76 |
| 8012 | 36.81 | 38.22 | 30.46 | 26.87 | 23.78 |
| 8014 | 36.8  | 38.21 | 30.47 | 26.86 | 23.79 |
| 8016 | 36.79 | 38.2  | 30.46 | 26.85 | 23.78 |
| 8018 | 36.8  | 38.21 | 30.49 | 26.87 | 23.79 |
| 8020 | 36.77 | 38.18 | 30.46 | 26.86 | 23.8  |
| 8022 | 36.76 | 38.17 | 30.47 | 26.86 | 23.81 |
| 8024 | 36.74 | 38.15 | 30.45 | 26.84 | 23.79 |
| 8026 | 36.73 | 38.14 | 30.45 | 26.84 | 23.79 |
| 8028 | 36.73 | 38.15 | 30.46 | 26.85 | 23.79 |
| 8030 | 36.7  | 38.13 | 30.44 | 26.84 | 23.78 |
| 8032 | 36.69 | 38.12 | 30.44 | 26.84 | 23.79 |
| 8034 | 36.7  | 38.13 | 30.46 | 26.86 | 23.79 |
| 8036 | 36.68 | 38.11 | 30.44 | 26.85 | 23.79 |
| 8038 | 36.65 | 38.09 | 30.42 | 26.82 | 23.76 |
| 8040 | 36.64 | 38.09 | 30.43 | 26.83 | 23.77 |
| 8042 | 36.63 | 38.08 | 30.43 | 26.84 | 23.78 |
| 8044 | 36.62 | 38.06 | 30.41 | 26.83 | 23.77 |
| 8046 | 36.61 | 38.06 | 30.42 | 26.84 | 23.78 |
| 8048 | 36.59 | 38.04 | 30.42 | 26.83 | 23.77 |
| 8050 | 36.61 | 38.06 | 30.45 | 26.85 | 23.81 |
| 8052 | 36.56 | 38.03 | 30.41 | 26.82 | 23.78 |
| 8054 | 36.57 | 38.04 | 30.43 | 26.84 | 23.81 |
| 8056 | 36.55 | 38.02 | 30.41 | 26.81 | 23.78 |
| 8058 | 36.51 | 37.98 | 30.38 | 26.79 | 23.76 |
| 8060 | 36.55 | 38.02 | 30.44 | 26.86 | 23.81 |
| 8062 | 36.53 | 38.01 | 30.41 | 26.83 | 23.79 |
| 8064 | 36.54 | 38.02 | 30.43 | 26.86 | 23.83 |

|      |       |       |       |       |       |
|------|-------|-------|-------|-------|-------|
| 8066 | 36.51 | 37.99 | 30.42 | 26.85 | 23.83 |
| 8068 | 36.46 | 37.96 | 30.4  | 26.82 | 23.79 |
| 8070 | 36.49 | 37.98 | 30.42 | 26.86 | 23.81 |
| 8072 | 36.45 | 37.96 | 30.4  | 26.82 | 23.79 |
| 8074 | 36.46 | 37.95 | 30.41 | 26.83 | 23.8  |
| 8076 | 36.43 | 37.92 | 30.39 | 26.82 | 23.79 |
| 8078 | 36.38 | 37.89 | 30.36 | 26.8  | 23.76 |
| 8080 | 36.39 | 37.9  | 30.37 | 26.8  | 23.77 |
| 8082 | 36.4  | 37.92 | 30.4  | 26.82 | 23.78 |
| 8084 | 36.39 | 37.92 | 30.4  | 26.83 | 23.79 |
| 8086 | 36.37 | 37.89 | 30.39 | 26.81 | 23.8  |
| 8088 | 36.35 | 37.86 | 30.38 | 26.82 | 23.8  |
| 8090 | 36.33 | 37.85 | 30.35 | 26.79 | 23.79 |
| 8092 | 36.32 | 37.84 | 30.36 | 26.79 | 23.78 |
| 8094 | 36.3  | 37.83 | 30.34 | 26.78 | 23.77 |
| 8096 | 36.32 | 37.84 | 30.36 | 26.8  | 23.79 |
| 8098 | 36.3  | 37.83 | 30.37 | 26.81 | 23.79 |
| 8100 | 36.26 | 37.79 | 30.34 | 26.77 | 23.76 |
| 8102 | 36.26 | 37.79 | 30.35 | 26.8  | 23.78 |
| 8104 | 36.28 | 37.82 | 30.35 | 26.8  | 23.78 |
| 8106 | 36.26 | 37.8  | 30.36 | 26.8  | 23.77 |
| 8108 | 36.27 | 37.81 | 30.37 | 26.82 | 23.8  |
| 8110 | 36.23 | 37.79 | 30.36 | 26.81 | 23.79 |
| 8112 | 36.21 | 37.76 | 30.35 | 26.79 | 23.77 |
| 8114 | 36.2  | 37.76 | 30.35 | 26.81 | 23.78 |
| 8116 | 36.18 | 37.74 | 30.33 | 26.79 | 23.77 |
| 8118 | 36.18 | 37.74 | 30.34 | 26.79 | 23.78 |
| 8120 | 36.17 | 37.74 | 30.33 | 26.79 | 23.79 |
| 8122 | 36.12 | 37.7  | 30.3  | 26.77 | 23.77 |
| 8124 | 36.15 | 37.72 | 30.34 | 26.8  | 23.8  |
| 8126 | 36.12 | 37.7  | 30.32 | 26.78 | 23.77 |
| 8128 | 36.1  | 37.68 | 30.3  | 26.76 | 23.77 |
| 8130 | 36.09 | 37.68 | 30.31 | 26.78 | 23.78 |
| 8132 | 36.11 | 37.7  | 30.34 | 26.81 | 23.81 |
| 8134 | 36.1  | 37.7  | 30.34 | 26.81 | 23.81 |
| 8136 | 36.07 | 37.66 | 30.31 | 26.78 | 23.76 |
| 8138 | 36.05 | 37.66 | 30.31 | 26.78 | 23.77 |
| 8140 | 36.03 | 37.63 | 30.3  | 26.77 | 23.77 |
| 8142 | 36.03 | 37.64 | 30.31 | 26.78 | 23.78 |
| 8144 | 36.04 | 37.65 | 30.33 | 26.81 | 23.8  |
| 8146 | 36    | 37.61 | 30.29 | 26.78 | 23.78 |
| 8148 | 35.95 | 37.56 | 30.26 | 26.74 | 23.74 |
| 8150 | 35.98 | 37.6  | 30.3  | 26.77 | 23.78 |
| 8152 | 35.98 | 37.6  | 30.31 | 26.78 | 23.8  |

|      |       |       |       |       |       |
|------|-------|-------|-------|-------|-------|
| 8154 | 35.96 | 37.59 | 30.31 | 26.77 | 23.8  |
| 8156 | 35.94 | 37.57 | 30.28 | 26.76 | 23.78 |
| 8158 | 35.92 | 37.55 | 30.27 | 26.75 | 23.76 |
| 8160 | 35.9  | 37.54 | 30.26 | 26.74 | 23.76 |
| 8162 | 35.87 | 37.52 | 30.25 | 26.72 | 23.75 |
| 8164 | 35.87 | 37.51 | 30.25 | 26.72 | 23.75 |
| 8166 | 35.86 | 37.51 | 30.24 | 26.73 | 23.74 |
| 8168 | 35.86 | 37.51 | 30.26 | 26.75 | 23.75 |
| 8170 | 35.84 | 37.48 | 30.24 | 26.73 | 23.73 |
| 8172 | 35.84 | 37.49 | 30.26 | 26.74 | 23.76 |
| 8174 | 35.84 | 37.51 | 30.28 | 26.77 | 23.79 |
| 8176 | 35.82 | 37.48 | 30.27 | 26.77 | 23.78 |
| 8178 | 35.82 | 37.49 | 30.27 | 26.77 | 23.78 |
| 8180 | 35.82 | 37.48 | 30.27 | 26.77 | 23.78 |
| 8182 | 35.8  | 37.47 | 30.28 | 26.77 | 23.79 |
| 8184 | 35.78 | 37.46 | 30.27 | 26.76 | 23.79 |
| 8186 | 35.77 | 37.45 | 30.26 | 26.75 | 23.79 |
| 8188 | 35.75 | 37.43 | 30.26 | 26.75 | 23.77 |
| 8190 | 35.74 | 37.42 | 30.24 | 26.75 | 23.78 |
| 8192 | 35.72 | 37.41 | 30.24 | 26.74 | 23.77 |
| 8194 | 35.69 | 37.4  | 30.24 | 26.73 | 23.77 |
| 8196 | 35.69 | 37.39 | 30.24 | 26.74 | 23.77 |
| 8198 | 35.68 | 37.39 | 30.23 | 26.74 | 23.77 |
| 8200 | 35.69 | 37.38 | 30.24 | 26.75 | 23.78 |
| 8202 | 35.66 | 37.36 | 30.22 | 26.74 | 23.75 |
| 8204 | 35.67 | 37.37 | 30.24 | 26.75 | 23.78 |
| 8206 | 35.65 | 37.36 | 30.22 | 26.74 | 23.77 |
| 8208 | 35.63 | 37.35 | 30.23 | 26.74 | 23.77 |
| 8210 | 35.63 | 37.35 | 30.24 | 26.75 | 23.78 |
| 8212 | 35.62 | 37.34 | 30.24 | 26.75 | 23.77 |
| 8214 | 35.61 | 37.34 | 30.22 | 26.73 | 23.75 |
| 8216 | 35.6  | 37.32 | 30.22 | 26.73 | 23.77 |
| 8218 | 35.58 | 37.31 | 30.22 | 26.74 | 23.78 |
| 8220 | 35.54 | 37.27 | 30.2  | 26.72 | 23.77 |
| 8222 | 35.54 | 37.28 | 30.21 | 26.73 | 23.77 |
| 8224 | 35.51 | 37.25 | 30.19 | 26.71 | 23.76 |
| 8226 | 35.52 | 37.24 | 30.18 | 26.71 | 23.77 |
| 8228 | 35.51 | 37.25 | 30.19 | 26.71 | 23.75 |
| 8230 | 35.47 | 37.22 | 30.18 | 26.7  | 23.75 |
| 8232 | 35.44 | 37.19 | 30.15 | 26.66 | 23.72 |
| 8234 | 35.45 | 37.2  | 30.16 | 26.7  | 23.75 |
| 8236 | 35.46 | 37.22 | 30.18 | 26.71 | 23.77 |
| 8238 | 35.45 | 37.21 | 30.18 | 26.71 | 23.77 |
| 8240 | 35.44 | 37.2  | 30.17 | 26.71 | 23.77 |

|      |       |       |       |       |       |
|------|-------|-------|-------|-------|-------|
| 8242 | 35.4  | 37.16 | 30.14 | 26.67 | 23.75 |
| 8244 | 35.36 | 37.13 | 30.12 | 26.64 | 23.7  |
| 8246 | 35.36 | 37.13 | 30.12 | 26.65 | 23.72 |
| 8248 | 35.36 | 37.12 | 30.12 | 26.65 | 23.72 |
| 8250 | 35.33 | 37.11 | 30.11 | 26.65 | 23.71 |
| 8252 | 35.32 | 37.11 | 30.13 | 26.66 | 23.72 |
| 8254 | 35.32 | 37.1  | 30.12 | 26.66 | 23.73 |
| 8256 | 35.34 | 37.13 | 30.15 | 26.69 | 23.76 |
| 8258 | 35.29 | 37.08 | 30.1  | 26.65 | 23.71 |
| 8260 | 35.3  | 37.09 | 30.12 | 26.66 | 23.71 |
| 8262 | 35.27 | 37.07 | 30.1  | 26.64 | 23.69 |
| 8264 | 35.25 | 37.05 | 30.09 | 26.63 | 23.7  |
| 8266 | 35.26 | 37.05 | 30.1  | 26.64 | 23.71 |
| 8268 | 35.23 | 37.03 | 30.09 | 26.63 | 23.69 |
| 8270 | 35.27 | 37.07 | 30.13 | 26.68 | 23.74 |
| 8272 | 35.25 | 37.05 | 30.13 | 26.69 | 23.75 |
| 8274 | 35.25 | 37.06 | 30.14 | 26.69 | 23.75 |
| 8276 | 35.24 | 37.05 | 30.13 | 26.68 | 23.75 |
| 8278 | 35.21 | 37.03 | 30.11 | 26.66 | 23.74 |
| 8280 | 35.22 | 37.04 | 30.13 | 26.68 | 23.75 |
| 8282 | 35.21 | 37.03 | 30.12 | 26.66 | 23.75 |
| 8284 | 35.19 | 37.01 | 30.11 | 26.67 | 23.74 |
| 8286 | 35.15 | 36.97 | 30.08 | 26.63 | 23.72 |
| 8288 | 35.15 | 36.97 | 30.08 | 26.64 | 23.73 |
| 8290 | 35.14 | 36.97 | 30.09 | 26.64 | 23.71 |
| 8292 | 35.1  | 36.94 | 30.06 | 26.62 | 23.69 |
| 8294 | 35.1  | 36.94 | 30.06 | 26.63 | 23.7  |
| 8296 | 35.13 | 36.97 | 30.11 | 26.67 | 23.74 |
| 8298 | 35.12 | 36.96 | 30.1  | 26.67 | 23.74 |
| 8300 | 35.09 | 36.94 | 30.09 | 26.66 | 23.73 |
| 8302 | 35.08 | 36.93 | 30.09 | 26.66 | 23.73 |
| 8304 | 35.07 | 36.92 | 30.08 | 26.65 | 23.74 |
| 8306 | 35.06 | 36.92 | 30.09 | 26.65 | 23.75 |
| 8308 | 35.05 | 36.91 | 30.08 | 26.65 | 23.74 |
| 8310 | 35.04 | 36.9  | 30.08 | 26.65 | 23.74 |
| 8312 | 35.03 | 36.9  | 30.08 | 26.65 | 23.74 |
| 8314 | 35.02 | 36.89 | 30.08 | 26.65 | 23.73 |
| 8316 | 35.01 | 36.87 | 30.08 | 26.65 | 23.74 |
| 8318 | 34.97 | 36.84 | 30.05 | 26.61 | 23.71 |
| 8320 | 34.96 | 36.83 | 30.02 | 26.6  | 23.71 |
| 8322 | 34.98 | 36.85 | 30.07 | 26.64 | 23.73 |
| 8324 | 34.98 | 36.85 | 30.07 | 26.64 | 23.72 |
| 8326 | 34.92 | 36.81 | 30.03 | 26.61 | 23.7  |
| 8328 | 34.96 | 36.83 | 30.06 | 26.64 | 23.73 |

|      |       |       |       |       |       |
|------|-------|-------|-------|-------|-------|
| 8330 | 34.95 | 36.82 | 30.06 | 26.64 | 23.73 |
| 8332 | 34.94 | 36.82 | 30.06 | 26.64 | 23.73 |
| 8334 | 34.92 | 36.81 | 30.06 | 26.65 | 23.73 |
| 8336 | 34.91 | 36.8  | 30.06 | 26.64 | 23.73 |
| 8338 | 34.89 | 36.78 | 30.04 | 26.63 | 23.73 |
| 8340 | 34.88 | 36.77 | 30.04 | 26.62 | 23.72 |
| 8342 | 34.89 | 36.78 | 30.05 | 26.64 | 23.74 |
| 8344 | 34.88 | 36.78 | 30.04 | 26.64 | 23.74 |
| 8346 | 34.85 | 36.75 | 30.04 | 26.63 | 23.73 |
| 8348 | 34.85 | 36.76 | 30.04 | 26.64 | 23.73 |
| 8350 | 34.84 | 36.74 | 30.05 | 26.63 | 23.74 |
| 8352 | 34.82 | 36.74 | 30.03 | 26.63 | 23.74 |
| 8354 | 34.79 | 36.71 | 30.01 | 26.61 | 23.72 |
| 8356 | 34.81 | 36.71 | 30.02 | 26.62 | 23.73 |
| 8358 | 34.78 | 36.71 | 30.02 | 26.62 | 23.73 |
| 8360 | 34.78 | 36.71 | 30.02 | 26.61 | 23.73 |
| 8362 | 34.77 | 36.69 | 30.01 | 26.61 | 23.73 |
| 8364 | 34.75 | 36.67 | 30    | 26.6  | 23.72 |
| 8366 | 34.74 | 36.68 | 30.02 | 26.62 | 23.74 |
| 8368 | 34.72 | 36.64 | 29.99 | 26.59 | 23.7  |
| 8370 | 34.72 | 36.64 | 29.99 | 26.6  | 23.71 |
| 8372 | 34.73 | 36.66 | 30.01 | 26.62 | 23.73 |
| 8374 | 34.76 | 36.69 | 30.05 | 26.66 | 23.77 |
| 8376 | 34.74 | 36.68 | 30.04 | 26.65 | 23.78 |
| 8378 | 34.71 | 36.65 | 30.03 | 26.63 | 23.77 |
| 8380 | 34.68 | 36.62 | 30    | 26.62 | 23.75 |
| 8382 | 34.69 | 36.64 | 30.01 | 26.62 | 23.75 |
| 8384 | 34.67 | 36.64 | 30.02 | 26.63 | 23.75 |
| 8386 | 34.68 | 36.63 | 30.03 | 26.63 | 23.75 |
| 8388 | 34.66 | 36.62 | 30.03 | 26.64 | 23.75 |
| 8390 | 34.65 | 36.6  | 30    | 26.63 | 23.75 |
| 8392 | 34.67 | 36.62 | 30.03 | 26.65 | 23.77 |
| 8394 | 34.66 | 36.62 | 30.03 | 26.66 | 23.77 |
| 8396 | 34.64 | 36.6  | 30.01 | 26.64 | 23.76 |
| 8398 | 34.6  | 36.55 | 29.98 | 26.6  | 23.73 |
| 8400 | 34.61 | 36.57 | 30    | 26.63 | 23.75 |
| 8402 | 34.61 | 36.58 | 30.02 | 26.64 | 23.77 |
| 8404 | 34.6  | 36.57 | 30.01 | 26.63 | 23.77 |
| 8406 | 34.58 | 36.56 | 30.01 | 26.63 | 23.77 |
| 8408 | 34.58 | 36.55 | 30.01 | 26.64 | 23.77 |
| 8410 | 34.55 | 36.53 | 29.99 | 26.63 | 23.75 |
| 8412 | 34.55 | 36.54 | 30    | 26.63 | 23.76 |
| 8414 | 34.54 | 36.53 | 29.99 | 26.61 | 23.76 |
| 8416 | 34.48 | 36.48 | 29.95 | 26.58 | 23.73 |

|      |       |       |       |       |       |
|------|-------|-------|-------|-------|-------|
| 8418 | 34.45 | 36.44 | 29.93 | 26.56 | 23.7  |
| 8420 | 34.5  | 36.48 | 29.97 | 26.61 | 23.73 |
| 8422 | 34.47 | 36.45 | 29.93 | 26.58 | 23.71 |
| 8424 | 34.44 | 36.43 | 29.93 | 26.56 | 23.7  |
| 8426 | 34.43 | 36.42 | 29.92 | 26.55 | 23.68 |
| 8428 | 34.42 | 36.43 | 29.92 | 26.57 | 23.7  |
| 8430 | 34.41 | 36.42 | 29.92 | 26.56 | 23.7  |
| 8432 | 34.39 | 36.4  | 29.92 | 26.56 | 23.7  |
| 8434 | 34.37 | 36.39 | 29.9  | 26.54 | 23.7  |
| 8436 | 34.36 | 36.37 | 29.9  | 26.54 | 23.7  |
| 8438 | 34.35 | 36.36 | 29.89 | 26.52 | 23.68 |
| 8440 | 34.3  | 36.32 | 29.84 | 26.49 | 23.64 |
| 8442 | 34.31 | 36.33 | 29.86 | 26.51 | 23.65 |
| 8444 | 34.29 | 36.31 | 29.86 | 26.5  | 23.66 |
| 8446 | 34.28 | 36.31 | 29.86 | 26.51 | 23.66 |
| 8448 | 34.31 | 36.34 | 29.89 | 26.54 | 23.69 |
| 8450 | 34.31 | 36.33 | 29.9  | 26.54 | 23.69 |
| 8452 | 34.29 | 36.32 | 29.89 | 26.55 | 23.69 |
| 8454 | 34.28 | 36.32 | 29.88 | 26.55 | 23.69 |
| 8456 | 34.28 | 36.31 | 29.88 | 26.55 | 23.69 |
| 8458 | 34.27 | 36.3  | 29.88 | 26.55 | 23.69 |
| 8460 | 34.24 | 36.28 | 29.87 | 26.52 | 23.69 |
| 8462 | 34.22 | 36.26 | 29.85 | 26.51 | 23.67 |
| 8464 | 34.23 | 36.27 | 29.87 | 26.53 | 23.69 |
| 8466 | 34.21 | 36.26 | 29.86 | 26.52 | 23.69 |
| 8468 | 34.2  | 36.25 | 29.86 | 26.52 | 23.69 |
| 8470 | 34.21 | 36.27 | 29.87 | 26.53 | 23.69 |
| 8472 | 34.17 | 36.23 | 29.85 | 26.51 | 23.68 |
| 8474 | 34.15 | 36.2  | 29.84 | 26.5  | 23.67 |
| 8476 | 34.15 | 36.22 | 29.85 | 26.51 | 23.68 |
| 8478 | 34.14 | 36.19 | 29.82 | 26.48 | 23.65 |
| 8480 | 34.11 | 36.17 | 29.81 | 26.49 | 23.66 |
| 8482 | 34.12 | 36.18 | 29.83 | 26.49 | 23.66 |
| 8484 | 34.12 | 36.19 | 29.83 | 26.5  | 23.68 |
| 8486 | 34.09 | 36.17 | 29.83 | 26.5  | 23.67 |
| 8488 | 34.05 | 36.12 | 29.78 | 26.45 | 23.62 |
| 8490 | 34.05 | 36.13 | 29.79 | 26.47 | 23.64 |
| 8492 | 34.07 | 36.16 | 29.84 | 26.5  | 23.68 |
| 8494 | 34.06 | 36.15 | 29.82 | 26.5  | 23.67 |
| 8496 | 34.04 | 36.13 | 29.81 | 26.47 | 23.64 |
| 8498 | 34.01 | 36.09 | 29.78 | 26.47 | 23.64 |
| 8500 | 34.01 | 36.09 | 29.78 | 26.46 | 23.65 |
| 8502 | 34.01 | 36.09 | 29.8  | 26.47 | 23.66 |
| 8504 | 34.02 | 36.1  | 29.8  | 26.48 | 23.67 |



|      |       |       |       |       |       |
|------|-------|-------|-------|-------|-------|
| 8506 | 34.01 | 36.1  | 29.8  | 26.49 | 23.66 |
| 8508 | 33.97 | 36.07 | 29.77 | 26.46 | 23.63 |
| 8510 | 33.98 | 36.08 | 29.79 | 26.48 | 23.65 |
| 8512 | 33.97 | 36.07 | 29.79 | 26.48 | 23.66 |
| 8514 | 33.96 | 36.06 | 29.79 | 26.48 | 23.66 |
| 8516 | 33.95 | 36.06 | 29.79 | 26.48 | 23.66 |
| 8518 | 33.94 | 36.05 | 29.79 | 26.47 | 23.66 |
| 8520 | 33.93 | 36.04 | 29.78 | 26.47 | 23.66 |
| 8522 | 33.91 | 36.02 | 29.78 | 26.45 | 23.64 |
| 8524 | 33.91 | 36.02 | 29.78 | 26.47 | 23.65 |
| 8526 | 33.93 | 36.05 | 29.8  | 26.49 | 23.66 |
| 8528 | 33.9  | 36.02 | 29.78 | 26.48 | 23.66 |
| 8530 | 33.89 | 36.01 | 29.78 | 26.48 | 23.66 |
| 8532 | 33.87 | 36.01 | 29.78 | 26.47 | 23.65 |
| 8534 | 33.87 | 36    | 29.77 | 26.47 | 23.65 |
| 8536 | 33.85 | 35.99 | 29.77 | 26.47 | 23.65 |
| 8538 | 33.83 | 35.98 | 29.76 | 26.46 | 23.65 |
| 8540 | 33.82 | 35.96 | 29.76 | 26.46 | 23.65 |
| 8542 | 33.8  | 35.94 | 29.74 | 26.44 | 23.63 |
| 8544 | 33.81 | 35.94 | 29.75 | 26.45 | 23.65 |
| 8546 | 33.8  | 35.94 | 29.75 | 26.45 | 23.65 |
| 8548 | 33.77 | 35.91 | 29.72 | 26.42 | 23.64 |
| 8550 | 33.76 | 35.9  | 29.73 | 26.43 | 23.63 |
| 8552 | 33.76 | 35.91 | 29.73 | 26.44 | 23.64 |
| 8554 | 33.74 | 35.91 | 29.72 | 26.42 | 23.63 |
| 8556 | 33.74 | 35.91 | 29.73 | 26.44 | 23.63 |
| 8558 | 33.75 | 35.9  | 29.73 | 26.46 | 23.64 |
| 8560 | 33.71 | 35.87 | 29.71 | 26.44 | 23.62 |
| 8562 | 33.7  | 35.87 | 29.71 | 26.43 | 23.63 |
| 8564 | 33.69 | 35.86 | 29.7  | 26.43 | 23.62 |
| 8566 | 33.71 | 35.87 | 29.74 | 26.46 | 23.65 |
| 8568 | 33.72 | 35.89 | 29.75 | 26.47 | 23.65 |
| 8570 | 33.68 | 35.86 | 29.72 | 26.45 | 23.63 |
| 8572 | 33.67 | 35.85 | 29.71 | 26.43 | 23.63 |
| 8574 | 33.64 | 35.82 | 29.69 | 26.42 | 23.62 |
| 8576 | 33.59 | 35.77 | 29.65 | 26.38 | 23.58 |
| 8578 | 33.61 | 35.8  | 29.68 | 26.4  | 23.61 |
| 8580 | 33.63 | 35.81 | 29.7  | 26.42 | 23.63 |
| 8582 | 33.62 | 35.81 | 29.7  | 26.42 | 23.63 |
| 8584 | 33.61 | 35.8  | 29.69 | 26.42 | 23.63 |
| 8586 | 33.58 | 35.77 | 29.68 | 26.39 | 23.61 |
| 8588 | 33.57 | 35.77 | 29.67 | 26.4  | 23.62 |
| 8590 | 33.56 | 35.77 | 29.67 | 26.39 | 23.61 |
| 8592 | 33.56 | 35.77 | 29.68 | 26.41 | 23.63 |

|      |       |       |       |       |       |
|------|-------|-------|-------|-------|-------|
| 8594 | 33.56 | 35.76 | 29.68 | 26.42 | 23.63 |
| 8596 | 33.51 | 35.72 | 29.64 | 26.4  | 23.6  |
| 8598 | 33.52 | 35.72 | 29.65 | 26.4  | 23.59 |
| 8600 | 33.53 | 35.72 | 29.66 | 26.41 | 23.61 |
| 8602 | 33.53 | 35.73 | 29.68 | 26.42 | 23.63 |
| 8604 | 33.52 | 35.73 | 29.68 | 26.43 | 23.62 |
| 8606 | 33.47 | 35.69 | 29.64 | 26.38 | 23.58 |
| 8608 | 33.5  | 35.71 | 29.67 | 26.42 | 23.63 |
| 8610 | 33.49 | 35.71 | 29.67 | 26.42 | 23.62 |
| 8612 | 33.49 | 35.71 | 29.67 | 26.42 | 23.62 |
| 8614 | 33.42 | 35.66 | 29.63 | 26.38 | 23.58 |
| 8616 | 33.46 | 35.68 | 29.66 | 26.41 | 23.62 |
| 8618 | 33.45 | 35.68 | 29.66 | 26.41 | 23.62 |
| 8620 | 33.44 | 35.67 | 29.66 | 26.41 | 23.62 |
| 8622 | 33.44 | 35.67 | 29.65 | 26.41 | 23.62 |
| 8624 | 33.4  | 35.63 | 29.62 | 26.37 | 23.59 |
| 8626 | 33.42 | 35.65 | 29.65 | 26.4  | 23.61 |
| 8628 | 33.41 | 35.65 | 29.65 | 26.41 | 23.62 |
| 8630 | 33.37 | 35.6  | 29.61 | 26.37 | 23.59 |
| 8632 | 33.37 | 35.62 | 29.64 | 26.39 | 23.61 |
| 8634 | 33.36 | 35.61 | 29.61 | 26.38 | 23.61 |
| 8636 | 33.31 | 35.56 | 29.58 | 26.35 | 23.58 |
| 8638 | 33.33 | 35.58 | 29.61 | 26.36 | 23.59 |
| 8640 | 33.33 | 35.57 | 29.6  | 26.35 | 23.59 |
| 8642 | 33.34 | 35.59 | 29.63 | 26.39 | 23.61 |
| 8644 | 33.33 | 35.59 | 29.62 | 26.38 | 23.62 |
| 8646 | 33.32 | 35.58 | 29.63 | 26.38 | 23.62 |
| 8648 | 33.28 | 35.54 | 29.61 | 26.37 | 23.61 |
| 8650 | 33.3  | 35.56 | 29.62 | 26.38 | 23.62 |
| 8652 | 33.3  | 35.56 | 29.62 | 26.39 | 23.61 |
| 8654 | 33.28 | 35.53 | 29.6  | 26.36 | 23.59 |
| 8656 | 33.25 | 35.51 | 29.58 | 26.35 | 23.58 |
| 8658 | 33.22 | 35.48 | 29.55 | 26.33 | 23.56 |
| 8660 | 33.23 | 35.49 | 29.57 | 26.33 | 23.56 |
| 8662 | 33.2  | 35.47 | 29.55 | 26.32 | 23.55 |
| 8664 | 33.22 | 35.49 | 29.57 | 26.34 | 23.56 |
| 8666 | 33.24 | 35.51 | 29.6  | 26.38 | 23.61 |
| 8668 | 33.23 | 35.49 | 29.59 | 26.37 | 23.6  |
| 8670 | 33.19 | 35.46 | 29.57 | 26.35 | 23.59 |
| 8672 | 33.16 | 35.43 | 29.54 | 26.31 | 23.56 |
| 8674 | 33.18 | 35.45 | 29.56 | 26.33 | 23.58 |
| 8676 | 33.17 | 35.46 | 29.56 | 26.33 | 23.58 |
| 8678 | 33.16 | 35.44 | 29.55 | 26.33 | 23.57 |
| 8680 | 33.11 | 35.41 | 29.53 | 26.31 | 23.55 |

|      |       |       |       |       |       |
|------|-------|-------|-------|-------|-------|
| 8682 | 33.14 | 35.44 | 29.55 | 26.33 | 23.58 |
| 8684 | 33.16 | 35.44 | 29.57 | 26.35 | 23.6  |
| 8686 | 33.14 | 35.43 | 29.55 | 26.33 | 23.58 |
| 8688 | 33.13 | 35.41 | 29.55 | 26.34 | 23.58 |
| 8690 | 33.15 | 35.44 | 29.58 | 26.37 | 23.61 |
| 8692 | 33.13 | 35.42 | 29.57 | 26.35 | 23.59 |
| 8694 | 33.05 | 35.35 | 29.5  | 26.29 | 23.54 |
| 8696 | 33.06 | 35.35 | 29.51 | 26.29 | 23.54 |
| 8698 | 33.05 | 35.35 | 29.51 | 26.3  | 23.53 |
| 8700 | 33.04 | 35.33 | 29.51 | 26.3  | 23.54 |
| 8702 | 33.04 | 35.34 | 29.51 | 26.3  | 23.55 |
| 8704 | 33.02 | 35.34 | 29.52 | 26.31 | 23.56 |
| 8706 | 33.01 | 35.32 | 29.49 | 26.3  | 23.55 |
| 8708 | 33.02 | 35.33 | 29.51 | 26.3  | 23.56 |
| 8710 | 33.05 | 35.35 | 29.55 | 26.34 | 23.6  |
| 8712 | 33.04 | 35.35 | 29.55 | 26.34 | 23.6  |
| 8714 | 33.02 | 35.34 | 29.54 | 26.34 | 23.6  |
| 8716 | 33.02 | 35.33 | 29.54 | 26.34 | 23.59 |
| 8718 | 33.01 | 35.33 | 29.54 | 26.34 | 23.59 |
| 8720 | 32.97 | 35.28 | 29.49 | 26.3  | 23.54 |
| 8722 | 33    | 35.32 | 29.53 | 26.34 | 23.58 |
| 8724 | 32.95 | 35.28 | 29.51 | 26.32 | 23.56 |
| 8726 | 32.95 | 35.27 | 29.51 | 26.32 | 23.56 |
| 8728 | 32.96 | 35.29 | 29.52 | 26.33 | 23.58 |
| 8730 | 32.92 | 35.25 | 29.49 | 26.3  | 23.56 |
| 8732 | 32.9  | 35.24 | 29.49 | 26.29 | 23.55 |
| 8734 | 32.94 | 35.27 | 29.52 | 26.33 | 23.58 |
| 8736 | 32.92 | 35.26 | 29.5  | 26.31 | 23.57 |
| 8738 | 32.92 | 35.26 | 29.51 | 26.32 | 23.59 |
| 8740 | 32.91 | 35.25 | 29.51 | 26.31 | 23.59 |
| 8742 | 32.9  | 35.24 | 29.51 | 26.31 | 23.58 |
| 8744 | 32.9  | 35.25 | 29.51 | 26.32 | 23.59 |
| 8746 | 32.88 | 35.22 | 29.5  | 26.32 | 23.58 |
| 8748 | 32.88 | 35.23 | 29.51 | 26.31 | 23.59 |
| 8750 | 32.88 | 35.23 | 29.52 | 26.32 | 23.58 |
| 8752 | 32.85 | 35.22 | 29.5  | 26.31 | 23.58 |
| 8754 | 32.85 | 35.2  | 29.49 | 26.31 | 23.58 |
| 8756 | 32.84 | 35.2  | 29.49 | 26.31 | 23.58 |
| 8758 | 32.83 | 35.19 | 29.49 | 26.3  | 23.58 |
| 8760 | 32.82 | 35.19 | 29.48 | 26.3  | 23.58 |
| 8762 | 32.86 | 35.22 | 29.52 | 26.35 | 23.63 |
| 8764 | 32.81 | 35.19 | 29.5  | 26.32 | 23.6  |
| 8766 | 32.79 | 35.17 | 29.5  | 26.31 | 23.59 |
| 8768 | 32.8  | 35.17 | 29.5  | 26.33 | 23.61 |

|            |      |       |       |       |       |       |
|------------|------|-------|-------|-------|-------|-------|
|            | 8770 | 32.78 | 35.15 | 29.48 | 26.3  | 23.58 |
|            | 8772 | 32.8  | 35.17 | 29.5  | 26.32 | 23.61 |
|            | 8774 | 32.79 | 35.16 | 29.5  | 26.34 | 23.6  |
| 100kg430C° | 0    | 20.9  | 21.08 | 21.06 | 21.06 | 20.79 |
|            | 2    | 20.92 | 21.09 | 21.07 | 21.06 | 20.79 |
|            | 4    | 20.91 | 21.09 | 21.07 | 21.05 | 20.79 |
|            | 6    | 20.89 | 21.08 | 21.06 | 21.04 | 20.76 |
|            | 8    | 20.89 | 21.09 | 21.07 | 21.05 | 20.78 |
|            | 10   | 20.9  | 21.11 | 21.07 | 21.06 | 20.8  |
|            | 12   | 20.9  | 21.1  | 21.09 | 21.07 | 20.79 |
|            | 14   | 20.91 | 21.11 | 21.08 | 21.07 | 20.8  |
|            | 16   | 20.91 | 21.11 | 21.08 | 21.07 | 20.8  |
|            | 18   | 20.91 | 21.11 | 21.08 | 21.07 | 20.8  |
|            | 20   | 20.94 | 21.13 | 21.11 | 21.08 | 20.82 |
|            | 22   | 20.92 | 21.11 | 21.09 | 21.07 | 20.8  |
|            | 24   | 20.91 | 21.1  | 21.07 | 21.07 | 20.8  |
|            | 26   | 20.91 | 21.1  | 21.07 | 21.06 | 20.8  |
|            | 28   | 20.88 | 21.07 | 21.04 | 21.04 | 20.77 |
|            | 30   | 20.88 | 21.08 | 21.05 | 21.05 | 20.78 |
|            | 32   | 20.9  | 21.09 | 21.04 | 21.04 | 20.79 |
|            | 34   | 20.88 | 21.07 | 21.04 | 21.03 | 20.78 |
|            | 36   | 20.88 | 21.07 | 21.04 | 21.03 | 20.79 |
|            | 38   | 20.88 | 21.07 | 21.03 | 21.02 | 20.79 |
|            | 40   | 20.87 | 21.05 | 21.02 | 21.01 | 20.78 |
|            | 42   | 20.88 | 21.06 | 21.03 | 21.03 | 20.79 |
|            | 44   | 20.89 | 21.06 | 21.03 | 21.02 | 20.79 |
|            | 46   | 20.88 | 21.06 | 21.04 | 21.02 | 20.81 |
|            | 48   | 20.85 | 21.03 | 21    | 20.98 | 20.77 |
|            | 50   | 20.85 | 21.02 | 20.98 | 20.97 | 20.76 |
|            | 52   | 20.84 | 21.01 | 20.98 | 20.95 | 20.76 |
|            | 54   | 20.82 | 20.99 | 20.96 | 20.93 | 20.74 |
|            | 56   | 20.83 | 20.99 | 20.95 | 20.94 | 20.75 |
|            | 58   | 20.82 | 20.99 | 20.94 | 20.94 | 20.74 |
|            | 60   | 20.83 | 20.99 | 20.95 | 20.94 | 20.76 |
|            | 62   | 20.82 | 20.98 | 20.94 | 20.93 | 20.74 |
|            | 64   | 20.84 | 20.98 | 20.94 | 20.93 | 20.74 |
|            | 66   | 20.85 | 21    | 20.96 | 20.94 | 20.76 |
|            | 68   | 20.83 | 20.98 | 20.95 | 20.95 | 20.75 |
|            | 70   | 20.83 | 20.98 | 20.94 | 20.94 | 20.74 |
|            | 72   | 20.82 | 20.95 | 20.92 | 20.91 | 20.73 |
|            | 74   | 20.81 | 20.95 | 20.91 | 20.9  | 20.72 |
|            | 76   | 20.77 | 20.9  | 20.86 | 20.85 | 20.69 |
|            | 78   | 20.8  | 20.93 | 20.89 | 20.88 | 20.71 |

|     |       |       |       |       |       |
|-----|-------|-------|-------|-------|-------|
| 80  | 20.8  | 20.94 | 20.89 | 20.88 | 20.72 |
| 82  | 20.79 | 20.93 | 20.88 | 20.87 | 20.71 |
| 84  | 20.79 | 20.93 | 20.88 | 20.86 | 20.71 |
| 86  | 20.79 | 20.92 | 20.87 | 20.86 | 20.72 |
| 88  | 20.77 | 20.9  | 20.86 | 20.85 | 20.7  |
| 90  | 20.77 | 20.87 | 20.83 | 20.83 | 20.68 |
| 92  | 20.76 | 20.87 | 20.84 | 20.84 | 20.68 |
| 94  | 20.78 | 20.9  | 20.86 | 20.85 | 20.7  |
| 96  | 20.8  | 20.91 | 20.87 | 20.87 | 20.71 |
| 98  | 20.76 | 20.87 | 20.83 | 20.83 | 20.68 |
| 100 | 20.78 | 20.89 | 20.85 | 20.85 | 20.7  |
| 102 | 20.79 | 20.91 | 20.87 | 20.87 | 20.71 |
| 104 | 20.79 | 20.91 | 20.86 | 20.85 | 20.71 |
| 106 | 20.79 | 20.9  | 20.86 | 20.84 | 20.71 |
| 108 | 20.79 | 20.9  | 20.86 | 20.84 | 20.71 |
| 110 | 20.79 | 20.89 | 20.85 | 20.84 | 20.7  |
| 112 | 20.79 | 20.89 | 20.84 | 20.83 | 20.7  |
| 114 | 20.79 | 20.89 | 20.84 | 20.82 | 20.7  |
| 116 | 20.77 | 20.88 | 20.82 | 20.8  | 20.69 |
| 118 | 20.78 | 20.88 | 20.83 | 20.82 | 20.7  |
| 120 | 20.77 | 20.86 | 20.8  | 20.8  | 20.68 |
| 122 | 20.77 | 20.84 | 20.79 | 20.79 | 20.67 |
| 124 | 20.78 | 20.86 | 20.81 | 20.82 | 20.68 |
| 126 | 20.79 | 20.87 | 20.82 | 20.82 | 20.69 |
| 128 | 20.78 | 20.86 | 20.81 | 20.8  | 20.67 |
| 130 | 20.77 | 20.84 | 20.8  | 20.8  | 20.66 |
| 132 | 20.76 | 20.85 | 20.81 | 20.81 | 20.67 |
| 134 | 20.73 | 20.81 | 20.76 | 20.77 | 20.63 |
| 136 | 20.77 | 20.84 | 20.8  | 20.79 | 20.68 |
| 138 | 20.76 | 20.85 | 20.79 | 20.78 | 20.67 |
| 140 | 20.77 | 20.85 | 20.79 | 20.78 | 20.67 |
| 142 | 20.8  | 20.87 | 20.81 | 20.81 | 20.69 |
| 144 | 20.83 | 20.87 | 20.81 | 20.81 | 20.69 |
| 146 | 20.86 | 20.87 | 20.81 | 20.81 | 20.7  |
| 148 | 20.88 | 20.87 | 20.81 | 20.81 | 20.7  |
| 150 | 20.92 | 20.89 | 20.82 | 20.84 | 20.72 |
| 152 | 20.96 | 20.9  | 20.84 | 20.85 | 20.73 |
| 154 | 20.96 | 20.89 | 20.83 | 20.83 | 20.7  |
| 156 | 20.97 | 20.89 | 20.81 | 20.82 | 20.7  |
| 158 | 20.97 | 20.87 | 20.81 | 20.83 | 20.7  |
| 160 | 20.96 | 20.85 | 20.77 | 20.78 | 20.67 |
| 162 | 20.99 | 20.9  | 20.8  | 20.82 | 20.7  |
| 164 | 21    | 20.91 | 20.82 | 20.83 | 20.7  |
| 166 | 21.01 | 20.95 | 20.85 | 20.83 | 20.71 |

|     |       |       |       |       |       |
|-----|-------|-------|-------|-------|-------|
| 168 | 21    | 20.96 | 20.87 | 20.83 | 20.71 |
| 170 | 21.03 | 20.99 | 20.92 | 20.87 | 20.77 |
| 172 | 21.03 | 21    | 20.93 | 20.85 | 20.73 |
| 174 | 21.05 | 21.05 | 20.96 | 20.89 | 20.76 |
| 176 | 21.02 | 21.01 | 20.94 | 20.87 | 20.73 |
| 178 | 21.01 | 21    | 20.95 | 20.88 | 20.73 |
| 180 | 21.01 | 21.02 | 20.96 | 20.9  | 20.74 |
| 182 | 21.04 | 21.05 | 20.98 | 20.95 | 20.77 |
| 184 | 21.06 | 21.08 | 21.02 | 20.98 | 20.81 |
| 186 | 21.06 | 21.08 | 21.03 | 20.98 | 20.8  |
| 188 | 21.05 | 21.07 | 21.03 | 20.97 | 20.79 |
| 190 | 21.07 | 21.1  | 21.05 | 21    | 20.81 |
| 192 | 21.04 | 21.1  | 21.03 | 20.98 | 20.79 |
| 194 | 21.05 | 21.12 | 21.07 | 21.01 | 20.81 |
| 196 | 21.03 | 21.1  | 21.03 | 20.97 | 20.8  |
| 198 | 21.01 | 21.1  | 21.03 | 20.96 | 20.8  |
| 200 | 21.02 | 21.1  | 21.03 | 20.98 | 20.8  |
| 202 | 21.04 | 21.12 | 21.05 | 20.99 | 20.81 |
| 204 | 21.05 | 21.13 | 21.07 | 21.01 | 20.83 |
| 206 | 21.04 | 21.13 | 21.06 | 21    | 20.81 |
| 208 | 21.05 | 21.12 | 21.06 | 21    | 20.81 |
| 210 | 21.07 | 21.13 | 21.06 | 21.01 | 20.82 |
| 212 | 21.09 | 21.15 | 21.09 | 21.05 | 20.85 |
| 214 | 21.11 | 21.15 | 21.09 | 21.05 | 20.83 |
| 216 | 21.13 | 21.16 | 21.11 | 21.06 | 20.83 |
| 218 | 21.15 | 21.18 | 21.12 | 21.07 | 20.86 |
| 220 | 21.18 | 21.22 | 21.15 | 21.1  | 20.89 |
| 222 | 21.17 | 21.2  | 21.14 | 21.08 | 20.86 |
| 224 | 21.19 | 21.22 | 21.16 | 21.1  | 20.89 |
| 226 | 21.24 | 21.25 | 21.17 | 21.11 | 20.9  |
| 228 | 21.23 | 21.22 | 21.15 | 21.08 | 20.89 |
| 230 | 21.25 | 21.21 | 21.15 | 21.08 | 20.88 |
| 232 | 21.27 | 21.24 | 21.17 | 21.1  | 20.89 |
| 234 | 21.3  | 21.25 | 21.17 | 21.11 | 20.89 |
| 236 | 21.31 | 21.24 | 21.15 | 21.09 | 20.88 |
| 238 | 21.31 | 21.21 | 21.13 | 21.08 | 20.85 |
| 240 | 21.37 | 21.23 | 21.16 | 21.09 | 20.87 |
| 242 | 21.4  | 21.23 | 21.16 | 21.1  | 20.88 |
| 244 | 21.42 | 21.23 | 21.15 | 21.11 | 20.87 |
| 246 | 21.46 | 21.23 | 21.16 | 21.11 | 20.86 |
| 248 | 21.48 | 21.21 | 21.14 | 21.09 | 20.86 |
| 250 | 21.53 | 21.24 | 21.16 | 21.1  | 20.87 |
| 252 | 21.58 | 21.25 | 21.17 | 21.12 | 20.88 |
| 254 | 21.66 | 21.27 | 21.19 | 21.13 | 20.89 |

|     |       |       |       |       |       |
|-----|-------|-------|-------|-------|-------|
| 256 | 21.72 | 21.31 | 21.21 | 21.15 | 20.92 |
| 258 | 21.74 | 21.28 | 21.19 | 21.12 | 20.9  |
| 260 | 21.79 | 21.29 | 21.2  | 21.14 | 20.92 |
| 262 | 21.86 | 21.31 | 21.22 | 21.16 | 20.93 |
| 264 | 21.91 | 21.32 | 21.22 | 21.15 | 20.92 |
| 266 | 21.95 | 21.29 | 21.21 | 21.15 | 20.91 |
| 268 | 22    | 21.27 | 21.19 | 21.12 | 20.89 |
| 270 | 22.07 | 21.26 | 21.19 | 21.14 | 20.89 |
| 272 | 22.14 | 21.28 | 21.2  | 21.14 | 20.89 |
| 274 | 22.21 | 21.26 | 21.18 | 21.13 | 20.89 |
| 276 | 22.29 | 21.26 | 21.18 | 21.14 | 20.88 |
| 278 | 22.36 | 21.29 | 21.2  | 21.15 | 20.9  |
| 280 | 22.45 | 21.29 | 21.21 | 21.15 | 20.89 |
| 282 | 22.54 | 21.31 | 21.22 | 21.15 | 20.89 |
| 284 | 22.59 | 21.3  | 21.21 | 21.15 | 20.88 |
| 286 | 22.67 | 21.32 | 21.22 | 21.15 | 20.91 |
| 288 | 22.78 | 21.32 | 21.22 | 21.15 | 20.91 |
| 290 | 22.88 | 21.33 | 21.24 | 21.16 | 20.92 |
| 292 | 22.95 | 21.31 | 21.2  | 21.14 | 20.89 |
| 294 | 23.05 | 21.33 | 21.22 | 21.16 | 20.92 |
| 296 | 23.12 | 21.29 | 21.21 | 21.13 | 20.88 |
| 298 | 23.2  | 21.28 | 21.18 | 21.12 | 20.87 |
| 300 | 23.29 | 21.27 | 21.17 | 21.11 | 20.85 |
| 302 | 23.45 | 21.32 | 21.21 | 21.14 | 20.89 |
| 304 | 23.6  | 21.35 | 21.27 | 21.19 | 20.92 |
| 306 | 23.7  | 21.34 | 21.26 | 21.19 | 20.91 |
| 308 | 23.78 | 21.33 | 21.24 | 21.19 | 20.9  |
| 310 | 23.92 | 21.35 | 21.25 | 21.19 | 20.92 |
| 312 | 24.01 | 21.32 | 21.22 | 21.16 | 20.88 |
| 314 | 24.16 | 21.36 | 21.26 | 21.2  | 20.91 |
| 316 | 24.31 | 21.37 | 21.27 | 21.21 | 20.93 |
| 318 | 24.46 | 21.4  | 21.29 | 21.23 | 20.96 |
| 320 | 24.56 | 21.38 | 21.28 | 21.22 | 20.95 |
| 322 | 24.66 | 21.35 | 21.25 | 21.19 | 20.91 |
| 324 | 24.78 | 21.33 | 21.24 | 21.19 | 20.91 |
| 326 | 24.9  | 21.31 | 21.23 | 21.17 | 20.88 |
| 328 | 25.05 | 21.32 | 21.23 | 21.17 | 20.87 |
| 330 | 25.18 | 21.35 | 21.26 | 21.2  | 20.91 |
| 332 | 25.33 | 21.36 | 21.26 | 21.2  | 20.93 |
| 334 | 25.48 | 21.39 | 21.28 | 21.21 | 20.94 |
| 336 | 25.65 | 21.39 | 21.28 | 21.2  | 20.94 |
| 338 | 25.77 | 21.37 | 21.27 | 21.19 | 20.92 |
| 340 | 25.93 | 21.39 | 21.28 | 21.21 | 20.95 |
| 342 | 26.07 | 21.38 | 21.27 | 21.19 | 20.93 |

|     |       |       |       |       |       |
|-----|-------|-------|-------|-------|-------|
| 344 | 26.22 | 21.37 | 21.25 | 21.19 | 20.93 |
| 346 | 26.36 | 21.37 | 21.27 | 21.19 | 20.93 |
| 348 | 26.47 | 21.34 | 21.23 | 21.15 | 20.88 |
| 350 | 26.69 | 21.38 | 21.24 | 21.17 | 20.9  |
| 352 | 26.83 | 21.36 | 21.24 | 21.16 | 20.9  |
| 354 | 27.03 | 21.39 | 21.28 | 21.2  | 20.94 |
| 356 | 27.19 | 21.4  | 21.28 | 21.19 | 20.93 |
| 358 | 27.39 | 21.4  | 21.29 | 21.2  | 20.94 |
| 360 | 27.56 | 21.41 | 21.29 | 21.21 | 20.95 |
| 362 | 27.72 | 21.41 | 21.29 | 21.21 | 20.95 |
| 364 | 27.88 | 21.42 | 21.3  | 21.22 | 20.94 |
| 366 | 28.09 | 21.41 | 21.29 | 21.22 | 20.95 |
| 368 | 28.23 | 21.38 | 21.27 | 21.19 | 20.93 |
| 370 | 28.4  | 21.38 | 21.28 | 21.21 | 20.93 |
| 372 | 28.63 | 21.41 | 21.32 | 21.24 | 20.95 |
| 374 | 28.82 | 21.42 | 21.32 | 21.24 | 20.95 |
| 376 | 28.99 | 21.43 | 21.31 | 21.24 | 20.95 |
| 378 | 29.19 | 21.43 | 21.32 | 21.24 | 20.95 |
| 380 | 29.33 | 21.38 | 21.27 | 21.2  | 20.9  |
| 382 | 29.58 | 21.42 | 21.29 | 21.22 | 20.92 |
| 384 | 29.76 | 21.4  | 21.28 | 21.21 | 20.92 |
| 386 | 29.96 | 21.4  | 21.28 | 21.2  | 20.9  |
| 388 | 30.17 | 21.42 | 21.3  | 21.21 | 20.93 |
| 390 | 30.36 | 21.39 | 21.26 | 21.19 | 20.92 |
| 392 | 30.57 | 21.41 | 21.27 | 21.17 | 20.9  |
| 394 | 30.75 | 21.42 | 21.29 | 21.19 | 20.92 |
| 396 | 30.93 | 21.4  | 21.25 | 21.17 | 20.9  |
| 398 | 31.21 | 21.43 | 21.27 | 21.2  | 20.92 |
| 400 | 31.39 | 21.41 | 21.26 | 21.18 | 20.91 |
| 402 | 31.6  | 21.39 | 21.25 | 21.17 | 20.9  |
| 404 | 31.8  | 21.39 | 21.25 | 21.17 | 20.9  |
| 406 | 32.06 | 21.39 | 21.25 | 21.17 | 20.9  |
| 408 | 32.33 | 21.45 | 21.31 | 21.23 | 20.96 |
| 410 | 32.52 | 21.42 | 21.29 | 21.2  | 20.94 |
| 412 | 32.73 | 21.43 | 21.3  | 21.21 | 20.93 |
| 414 | 32.95 | 21.4  | 21.26 | 21.17 | 20.9  |
| 416 | 33.18 | 21.41 | 21.26 | 21.17 | 20.9  |
| 418 | 33.41 | 21.41 | 21.26 | 21.17 | 20.9  |
| 420 | 33.63 | 21.41 | 21.26 | 21.18 | 20.9  |
| 422 | 33.9  | 21.41 | 21.27 | 21.17 | 20.91 |
| 424 | 34.14 | 21.42 | 21.26 | 21.18 | 20.91 |
| 426 | 34.36 | 21.42 | 21.26 | 21.17 | 20.9  |
| 428 | 34.6  | 21.43 | 21.27 | 21.18 | 20.9  |
| 430 | 34.92 | 21.49 | 21.32 | 21.23 | 20.96 |



|     |       |       |       |       |       |
|-----|-------|-------|-------|-------|-------|
| 432 | 35.16 | 21.5  | 21.34 | 21.23 | 20.98 |
| 434 | 35.4  | 21.5  | 21.34 | 21.25 | 20.97 |
| 436 | 35.64 | 21.51 | 21.35 | 21.25 | 20.98 |
| 438 | 35.92 | 21.52 | 21.35 | 21.26 | 20.97 |
| 440 | 36.16 | 21.52 | 21.36 | 21.27 | 20.97 |
| 442 | 36.4  | 21.52 | 21.35 | 21.27 | 20.98 |
| 444 | 36.62 | 21.51 | 21.35 | 21.27 | 20.97 |
| 446 | 36.92 | 21.52 | 21.34 | 21.25 | 20.98 |
| 448 | 37.19 | 21.56 | 21.37 | 21.28 | 20.99 |
| 450 | 37.42 | 21.54 | 21.36 | 21.28 | 21    |
| 452 | 37.67 | 21.55 | 21.38 | 21.28 | 20.99 |
| 454 | 37.96 | 21.54 | 21.36 | 21.27 | 20.98 |
| 456 | 38.19 | 21.53 | 21.36 | 21.27 | 20.97 |
| 458 | 38.43 | 21.52 | 21.35 | 21.25 | 20.96 |
| 460 | 38.71 | 21.55 | 21.37 | 21.28 | 20.99 |
| 462 | 38.99 | 21.56 | 21.36 | 21.27 | 20.98 |
| 464 | 39.22 | 21.54 | 21.35 | 21.26 | 20.96 |
| 466 | 39.44 | 21.51 | 21.31 | 21.22 | 20.93 |
| 468 | 39.7  | 21.51 | 21.3  | 21.21 | 20.92 |
| 470 | 40.01 | 21.52 | 21.31 | 21.21 | 20.92 |
| 472 | 40.27 | 21.53 | 21.31 | 21.21 | 20.93 |
| 474 | 40.54 | 21.56 | 21.33 | 21.23 | 20.93 |
| 476 | 40.78 | 21.54 | 21.31 | 21.23 | 20.94 |
| 478 | 41.06 | 21.54 | 21.3  | 21.19 | 20.93 |
| 480 | 41.35 | 21.57 | 21.32 | 21.2  | 20.94 |
| 482 | 41.61 | 21.58 | 21.33 | 21.23 | 20.96 |
| 484 | 41.87 | 21.56 | 21.32 | 21.21 | 20.94 |
| 486 | 42.18 | 21.57 | 21.32 | 21.22 | 20.95 |
| 488 | 42.44 | 21.57 | 21.31 | 21.2  | 20.93 |
| 490 | 42.74 | 21.61 | 21.34 | 21.24 | 20.97 |
| 492 | 42.99 | 21.6  | 21.32 | 21.22 | 20.94 |
| 494 | 43.3  | 21.6  | 21.32 | 21.22 | 20.94 |
| 496 | 43.58 | 21.61 | 21.34 | 21.24 | 20.96 |
| 498 | 43.85 | 21.61 | 21.33 | 21.23 | 20.95 |
| 500 | 44.16 | 21.62 | 21.33 | 21.23 | 20.95 |
| 502 | 44.4  | 21.6  | 21.31 | 21.2  | 20.92 |
| 504 | 44.71 | 21.67 | 21.35 | 21.24 | 20.95 |
| 506 | 45    | 21.7  | 21.37 | 21.26 | 20.96 |
| 508 | 45.25 | 21.68 | 21.35 | 21.24 | 20.97 |
| 510 | 45.57 | 21.69 | 21.35 | 21.23 | 20.98 |
| 512 | 45.85 | 21.69 | 21.34 | 21.25 | 20.97 |
| 514 | 46.13 | 21.7  | 21.34 | 21.23 | 20.97 |
| 516 | 46.43 | 21.74 | 21.38 | 21.26 | 21.01 |
| 518 | 46.7  | 21.75 | 21.38 | 21.27 | 21.01 |

|     |       |       |       |       |       |
|-----|-------|-------|-------|-------|-------|
| 520 | 47.04 | 21.78 | 21.39 | 21.28 | 21.02 |
| 522 | 47.32 | 21.78 | 21.4  | 21.29 | 21.02 |
| 524 | 47.59 | 21.8  | 21.4  | 21.28 | 21.01 |
| 526 | 47.91 | 21.81 | 21.4  | 21.29 | 21.01 |
| 528 | 48.17 | 21.82 | 21.4  | 21.28 | 21    |
| 530 | 48.46 | 21.84 | 21.4  | 21.29 | 21.01 |
| 532 | 48.7  | 21.81 | 21.36 | 21.26 | 20.98 |
| 534 | 49.03 | 21.82 | 21.38 | 21.27 | 20.98 |
| 536 | 49.33 | 21.85 | 21.38 | 21.28 | 21.01 |
| 538 | 49.58 | 21.84 | 21.35 | 21.22 | 20.98 |
| 540 | 49.89 | 21.88 | 21.38 | 21.25 | 21.01 |
| 542 | 50.23 | 21.9  | 21.4  | 21.27 | 21.03 |
| 544 | 50.48 | 21.89 | 21.36 | 21.23 | 20.98 |
| 546 | 50.75 | 21.9  | 21.35 | 21.22 | 20.97 |
| 548 | 51.02 | 21.89 | 21.34 | 21.21 | 20.96 |
| 550 | 51.31 | 21.9  | 21.33 | 21.21 | 20.96 |
| 552 | 51.64 | 21.93 | 21.34 | 21.23 | 20.97 |
| 554 | 51.91 | 21.92 | 21.33 | 21.21 | 20.94 |
| 556 | 52.2  | 21.94 | 21.32 | 21.21 | 20.94 |
| 558 | 52.57 | 21.99 | 21.37 | 21.24 | 20.98 |
| 560 | 52.86 | 22.01 | 21.37 | 21.24 | 20.98 |
| 562 | 53.14 | 22.04 | 21.37 | 21.24 | 20.98 |
| 564 | 53.43 | 22.06 | 21.37 | 21.25 | 20.98 |
| 566 | 53.76 | 22.08 | 21.38 | 21.25 | 20.99 |
| 568 | 54.04 | 22.1  | 21.37 | 21.24 | 20.99 |
| 570 | 54.32 | 22.12 | 21.37 | 21.22 | 20.99 |
| 572 | 54.6  | 22.14 | 21.37 | 21.23 | 20.99 |
| 574 | 54.93 | 22.16 | 21.36 | 21.2  | 20.97 |
| 576 | 55.23 | 22.19 | 21.37 | 21.23 | 20.99 |
| 578 | 55.51 | 22.21 | 21.37 | 21.24 | 21    |
| 580 | 55.79 | 22.23 | 21.35 | 21.21 | 20.98 |
| 582 | 56.14 | 22.28 | 21.4  | 21.26 | 21.02 |
| 584 | 56.43 | 22.29 | 21.39 | 21.25 | 21.01 |
| 586 | 56.75 | 22.34 | 21.41 | 21.28 | 21.02 |
| 588 | 57.02 | 22.35 | 21.39 | 21.26 | 21    |
| 590 | 57.39 | 22.43 | 21.45 | 21.31 | 21.05 |
| 592 | 57.68 | 22.45 | 21.44 | 21.3  | 21.05 |
| 594 | 57.97 | 22.49 | 21.46 | 21.32 | 21.07 |
| 596 | 58.21 | 22.47 | 21.41 | 21.26 | 21.02 |
| 598 | 58.57 | 22.54 | 21.45 | 21.29 | 21.04 |
| 600 | 58.86 | 22.55 | 21.44 | 21.3  | 21.06 |
| 602 | 59.13 | 22.57 | 21.42 | 21.27 | 21.03 |
| 604 | 59.39 | 22.59 | 21.4  | 21.25 | 21.01 |
| 606 | 59.73 | 22.61 | 21.4  | 21.24 | 21.01 |

|     |       |       |       |       |       |
|-----|-------|-------|-------|-------|-------|
| 608 | 60.03 | 22.65 | 21.4  | 21.24 | 21.01 |
| 610 | 60.31 | 22.67 | 21.39 | 21.23 | 21.01 |
| 612 | 60.6  | 22.71 | 21.41 | 21.24 | 21.02 |
| 614 | 60.89 | 22.74 | 21.41 | 21.25 | 21.02 |
| 616 | 61.23 | 22.78 | 21.4  | 21.25 | 21.03 |
| 618 | 61.53 | 22.82 | 21.41 | 21.25 | 21.03 |
| 620 | 61.8  | 22.85 | 21.41 | 21.25 | 21.01 |
| 622 | 62.17 | 22.9  | 21.43 | 21.26 | 21.03 |
| 624 | 62.45 | 22.94 | 21.44 | 21.27 | 21.03 |
| 626 | 62.73 | 22.98 | 21.43 | 21.27 | 21.04 |
| 628 | 62.99 | 22.99 | 21.41 | 21.25 | 21.02 |
| 630 | 63.3  | 23.02 | 21.4  | 21.24 | 21    |
| 632 | 63.62 | 23.08 | 21.41 | 21.24 | 21.02 |
| 634 | 63.89 | 23.1  | 21.39 | 21.22 | 21.01 |
| 636 | 64.2  | 23.16 | 21.42 | 21.24 | 21.03 |
| 638 | 64.55 | 23.22 | 21.44 | 21.25 | 21.05 |
| 640 | 64.83 | 23.26 | 21.44 | 21.26 | 21.06 |
| 642 | 65.12 | 23.31 | 21.44 | 21.26 | 21.06 |
| 644 | 65.41 | 23.36 | 21.44 | 21.26 | 21.06 |
| 646 | 65.74 | 23.4  | 21.45 | 21.26 | 21.06 |
| 648 | 66.07 | 23.47 | 21.48 | 21.28 | 21.08 |
| 650 | 66.36 | 23.53 | 21.49 | 21.3  | 21.08 |
| 652 | 66.66 | 23.58 | 21.51 | 21.33 | 21.1  |
| 654 | 66.96 | 23.6  | 21.48 | 21.3  | 21.08 |
| 656 | 67.24 | 23.65 | 21.48 | 21.29 | 21.07 |
| 658 | 67.5  | 23.66 | 21.45 | 21.25 | 21.05 |
| 660 | 67.82 | 23.74 | 21.48 | 21.29 | 21.08 |
| 662 | 68.15 | 23.8  | 21.48 | 21.29 | 21.09 |
| 664 | 68.42 | 23.85 | 21.48 | 21.28 | 21.08 |
| 666 | 68.69 | 23.88 | 21.46 | 21.26 | 21.07 |
| 668 | 68.97 | 23.94 | 21.47 | 21.26 | 21.08 |
| 670 | 69.23 | 23.95 | 21.45 | 21.25 | 21.06 |
| 672 | 69.61 | 24.04 | 21.48 | 21.27 | 21.08 |
| 674 | 69.9  | 24.1  | 21.48 | 21.26 | 21.08 |
| 676 | 70.19 | 24.15 | 21.5  | 21.29 | 21.09 |
| 678 | 70.54 | 24.22 | 21.5  | 21.29 | 21.1  |
| 680 | 70.83 | 24.28 | 21.51 | 21.31 | 21.1  |
| 682 | 71.12 | 24.34 | 21.53 | 21.33 | 21.11 |
| 684 | 71.41 | 24.4  | 21.54 | 21.31 | 21.13 |
| 686 | 71.75 | 24.48 | 21.55 | 21.34 | 21.14 |
| 688 | 72.02 | 24.53 | 21.55 | 21.31 | 21.12 |
| 690 | 72.32 | 24.61 | 21.57 | 21.34 | 21.13 |
| 692 | 72.63 | 24.65 | 21.54 | 21.31 | 21.12 |
| 694 | 72.9  | 24.7  | 21.53 | 21.29 | 21.12 |

|     |       |       |       |       |       |
|-----|-------|-------|-------|-------|-------|
| 696 | 73.21 | 24.78 | 21.56 | 21.3  | 21.13 |
| 698 | 73.48 | 24.82 | 21.54 | 21.3  | 21.13 |
| 700 | 73.79 | 24.9  | 21.56 | 21.33 | 21.16 |
| 702 | 74.13 | 24.99 | 21.56 | 21.32 | 21.16 |
| 704 | 74.39 | 25.02 | 21.55 | 21.3  | 21.14 |
| 706 | 74.67 | 25.07 | 21.55 | 21.31 | 21.13 |
| 708 | 74.96 | 25.14 | 21.56 | 21.32 | 21.14 |
| 710 | 75.23 | 25.18 | 21.56 | 21.31 | 21.13 |
| 712 | 75.55 | 25.26 | 21.55 | 21.32 | 21.14 |
| 714 | 75.86 | 25.33 | 21.57 | 21.33 | 21.14 |
| 716 | 76.15 | 25.41 | 21.59 | 21.33 | 21.14 |
| 718 | 76.46 | 25.45 | 21.58 | 21.31 | 21.13 |
| 720 | 76.72 | 25.51 | 21.57 | 21.3  | 21.12 |
| 722 | 76.98 | 25.57 | 21.56 | 21.28 | 21.13 |
| 724 | 77.25 | 25.61 | 21.53 | 21.25 | 21.1  |
| 726 | 77.6  | 25.72 | 21.56 | 21.28 | 21.11 |
| 728 | 77.91 | 25.81 | 21.6  | 21.32 | 21.16 |
| 730 | 78.15 | 25.85 | 21.57 | 21.29 | 21.13 |
| 732 | 78.48 | 25.95 | 21.6  | 21.32 | 21.16 |
| 734 | 78.81 | 26.02 | 21.62 | 21.34 | 21.16 |
| 736 | 79.09 | 26.06 | 21.59 | 21.3  | 21.13 |
| 738 | 79.39 | 26.16 | 21.62 | 21.34 | 21.16 |
| 740 | 79.68 | 26.25 | 21.64 | 21.35 | 21.17 |
| 742 | 80.01 | 26.33 | 21.65 | 21.35 | 21.17 |
| 744 | 80.31 | 26.42 | 21.66 | 21.36 | 21.19 |
| 746 | 80.56 | 26.48 | 21.66 | 21.35 | 21.18 |
| 748 | 80.81 | 26.53 | 21.64 | 21.33 | 21.17 |
| 750 | 81.09 | 26.62 | 21.65 | 21.33 | 21.18 |
| 752 | 81.43 | 26.7  | 21.66 | 21.34 | 21.18 |
| 754 | 81.74 | 26.8  | 21.69 | 21.35 | 21.19 |
| 756 | 82.01 | 26.86 | 21.68 | 21.34 | 21.19 |
| 758 | 82.34 | 26.94 | 21.69 | 21.36 | 21.2  |
| 760 | 82.65 | 27.05 | 21.73 | 21.39 | 21.22 |
| 762 | 82.95 | 27.12 | 21.73 | 21.39 | 21.23 |
| 764 | 83.24 | 27.21 | 21.74 | 21.4  | 21.23 |
| 766 | 83.56 | 27.26 | 21.74 | 21.39 | 21.23 |
| 768 | 83.84 | 27.36 | 21.75 | 21.41 | 21.25 |
| 770 | 84.09 | 27.42 | 21.73 | 21.38 | 21.21 |
| 772 | 84.36 | 27.49 | 21.75 | 21.38 | 21.21 |
| 774 | 84.7  | 27.58 | 21.74 | 21.37 | 21.23 |
| 776 | 84.99 | 27.68 | 21.77 | 21.39 | 21.25 |
| 778 | 85.25 | 27.74 | 21.76 | 21.36 | 21.22 |
| 780 | 85.53 | 27.82 | 21.76 | 21.36 | 21.23 |
| 782 | 85.86 | 27.91 | 21.76 | 21.37 | 21.23 |

|     |       |       |       |       |       |
|-----|-------|-------|-------|-------|-------|
| 784 | 86.1  | 27.95 | 21.73 | 21.33 | 21.19 |
| 786 | 86.42 | 28.06 | 21.77 | 21.37 | 21.23 |
| 788 | 86.75 | 28.15 | 21.79 | 21.37 | 21.24 |
| 790 | 87.05 | 28.24 | 21.8  | 21.39 | 21.24 |
| 792 | 87.33 | 28.32 | 21.82 | 21.4  | 21.24 |
| 794 | 87.61 | 28.41 | 21.82 | 21.4  | 21.25 |
| 796 | 87.87 | 28.49 | 21.83 | 21.4  | 21.25 |
| 798 | 88.22 | 28.59 | 21.85 | 21.41 | 21.27 |
| 800 | 88.49 | 28.69 | 21.85 | 21.4  | 21.26 |
| 802 | 88.77 | 28.76 | 21.85 | 21.4  | 21.26 |
| 804 | 89.04 | 28.84 | 21.85 | 21.39 | 21.26 |
| 806 | 89.39 | 28.95 | 21.89 | 21.41 | 21.3  |
| 808 | 89.67 | 29.06 | 21.9  | 21.42 | 21.31 |
| 810 | 89.96 | 29.17 | 21.93 | 21.44 | 21.32 |
| 812 | 90.27 | 29.26 | 21.93 | 21.45 | 21.32 |
| 814 | 90.51 | 29.28 | 21.89 | 21.38 | 21.27 |
| 816 | 90.78 | 29.36 | 21.88 | 21.37 | 21.27 |
| 818 | 91.09 | 29.47 | 21.91 | 21.41 | 21.29 |
| 820 | 91.43 | 29.57 | 21.93 | 21.43 | 21.29 |
| 822 | 91.71 | 29.67 | 21.95 | 21.43 | 21.29 |
| 824 | 92.01 | 29.77 | 21.97 | 21.44 | 21.29 |
| 826 | 92.29 | 29.86 | 21.97 | 21.43 | 21.3  |
| 828 | 92.57 | 29.95 | 21.98 | 21.44 | 21.31 |
| 830 | 92.87 | 30.02 | 21.96 | 21.41 | 21.29 |
| 832 | 93.16 | 30.13 | 21.99 | 21.41 | 21.3  |
| 834 | 93.44 | 30.23 | 22    | 21.42 | 21.31 |
| 836 | 93.71 | 30.31 | 22.01 | 21.42 | 21.32 |
| 838 | 94.03 | 30.4  | 22.02 | 21.43 | 21.32 |
| 840 | 94.31 | 30.51 | 22.04 | 21.43 | 21.32 |
| 842 | 94.6  | 30.6  | 22.05 | 21.43 | 21.34 |
| 844 | 94.93 | 30.72 | 22.11 | 21.48 | 21.38 |
| 846 | 95.23 | 30.78 | 22.08 | 21.46 | 21.34 |
| 848 | 95.57 | 30.94 | 22.15 | 21.52 | 21.4  |
| 850 | 95.83 | 31.04 | 22.17 | 21.52 | 21.4  |
| 852 | 96.13 | 31.12 | 22.18 | 21.51 | 21.39 |
| 854 | 96.45 | 31.22 | 22.19 | 21.52 | 21.41 |
| 856 | 96.7  | 31.27 | 22.17 | 21.48 | 21.36 |
| 858 | 97.01 | 31.4  | 22.21 | 21.51 | 21.4  |
| 860 | 97.29 | 31.51 | 22.23 | 21.52 | 21.42 |
| 862 | 97.59 | 31.57 | 22.21 | 21.48 | 21.39 |
| 864 | 97.86 | 31.66 | 22.22 | 21.48 | 21.4  |
| 866 | 98.1  | 31.72 | 22.18 | 21.44 | 21.35 |
| 868 | 98.41 | 31.82 | 22.22 | 21.46 | 21.37 |
| 870 | 98.74 | 31.9  | 22.22 | 21.45 | 21.37 |

|     |        |       |       |       |       |
|-----|--------|-------|-------|-------|-------|
| 872 | 99     | 32    | 22.22 | 21.45 | 21.37 |
| 874 | 99.28  | 32.07 | 22.22 | 21.43 | 21.34 |
| 876 | 99.59  | 32.19 | 22.26 | 21.46 | 21.37 |
| 878 | 99.9   | 32.24 | 22.25 | 21.43 | 21.34 |
| 880 | 100.2  | 32.38 | 22.28 | 21.47 | 21.37 |
| 882 | 100.46 | 32.47 | 22.3  | 21.47 | 21.36 |
| 884 | 100.74 | 32.56 | 22.31 | 21.46 | 21.37 |
| 886 | 101.08 | 32.68 | 22.33 | 21.47 | 21.37 |
| 888 | 101.36 | 32.76 | 22.34 | 21.46 | 21.37 |
| 890 | 101.67 | 32.87 | 22.38 | 21.46 | 21.38 |
| 892 | 101.99 | 33    | 22.42 | 21.49 | 21.43 |
| 894 | 102.34 | 33.1  | 22.44 | 21.51 | 21.44 |
| 896 | 102.64 | 33.22 | 22.46 | 21.52 | 21.44 |
| 898 | 102.9  | 33.28 | 22.45 | 21.5  | 21.43 |
| 900 | 103.18 | 33.39 | 22.47 | 21.5  | 21.42 |
| 902 | 103.48 | 33.46 | 22.45 | 21.48 | 21.41 |
| 904 | 103.78 | 33.58 | 22.51 | 21.52 | 21.44 |
| 906 | 104.1  | 33.7  | 22.56 | 21.55 | 21.47 |
| 908 | 104.44 | 33.81 | 22.58 | 21.57 | 21.48 |
| 910 | 104.73 | 33.93 | 22.6  | 21.57 | 21.48 |
| 912 | 105    | 33.99 | 22.58 | 21.53 | 21.45 |
| 914 | 105.32 | 34.1  | 22.64 | 21.57 | 21.48 |
| 916 | 105.59 | 34.18 | 22.63 | 21.56 | 21.47 |
| 918 | 105.93 | 34.28 | 22.67 | 21.57 | 21.48 |
| 920 | 106.21 | 34.39 | 22.68 | 21.56 | 21.48 |
| 922 | 106.48 | 34.48 | 22.7  | 21.55 | 21.49 |
| 924 | 106.78 | 34.59 | 22.72 | 21.55 | 21.49 |
| 926 | 107.12 | 34.7  | 22.75 | 21.58 | 21.51 |
| 928 | 107.4  | 34.79 | 22.77 | 21.58 | 21.52 |
| 930 | 107.68 | 34.89 | 22.79 | 21.58 | 21.52 |
| 932 | 107.97 | 34.98 | 22.82 | 21.57 | 21.52 |
| 934 | 108.3  | 35.07 | 22.83 | 21.59 | 21.53 |
| 936 | 108.6  | 35.17 | 22.86 | 21.61 | 21.54 |
| 938 | 108.91 | 35.28 | 22.89 | 21.62 | 21.54 |
| 940 | 109.21 | 35.39 | 22.94 | 21.65 | 21.57 |
| 942 | 109.54 | 35.47 | 22.95 | 21.63 | 21.56 |
| 944 | 109.78 | 35.55 | 22.97 | 21.63 | 21.56 |
| 946 | 110.11 | 35.66 | 22.99 | 21.63 | 21.57 |
| 948 | 110.44 | 35.76 | 23.01 | 21.64 | 21.57 |
| 950 | 110.67 | 35.85 | 23.03 | 21.63 | 21.57 |
| 952 | 111    | 35.95 | 23.05 | 21.63 | 21.58 |
| 954 | 111.3  | 36.05 | 23.07 | 21.63 | 21.6  |
| 956 | 111.59 | 36.13 | 23.09 | 21.63 | 21.59 |
| 958 | 111.94 | 36.24 | 23.11 | 21.64 | 21.59 |

|      |        |       |       |       |       |
|------|--------|-------|-------|-------|-------|
| 960  | 112.28 | 36.38 | 23.19 | 21.7  | 21.64 |
| 962  | 112.56 | 36.46 | 23.2  | 21.69 | 21.65 |
| 964  | 112.82 | 36.53 | 23.21 | 21.67 | 21.63 |
| 966  | 113.15 | 36.62 | 23.24 | 21.69 | 21.65 |
| 968  | 113.4  | 36.68 | 23.22 | 21.66 | 21.59 |
| 970  | 113.71 | 36.79 | 23.27 | 21.69 | 21.62 |
| 972  | 114    | 36.89 | 23.3  | 21.69 | 21.63 |
| 974  | 114.35 | 37.01 | 23.34 | 21.71 | 21.66 |
| 976  | 114.63 | 37.09 | 23.35 | 21.7  | 21.64 |
| 978  | 114.95 | 37.2  | 23.39 | 21.73 | 21.69 |
| 980  | 115.28 | 37.33 | 23.46 | 21.76 | 21.7  |
| 982  | 115.62 | 37.42 | 23.48 | 21.76 | 21.71 |
| 984  | 115.89 | 37.52 | 23.51 | 21.76 | 21.72 |
| 986  | 116.19 | 37.63 | 23.55 | 21.77 | 21.76 |
| 988  | 116.47 | 37.7  | 23.56 | 21.77 | 21.74 |
| 990  | 116.79 | 37.79 | 23.58 | 21.77 | 21.74 |
| 992  | 117.06 | 37.86 | 23.58 | 21.75 | 21.73 |
| 994  | 117.35 | 37.93 | 23.59 | 21.73 | 21.7  |
| 996  | 117.64 | 38.01 | 23.62 | 21.75 | 21.71 |
| 998  | 118.03 | 38.15 | 23.68 | 21.79 | 21.75 |
| 1000 | 118.35 | 38.26 | 23.74 | 21.83 | 21.77 |
| 1002 | 118.64 | 38.34 | 23.76 | 21.83 | 21.78 |
| 1004 | 118.93 | 38.42 | 23.79 | 21.83 | 21.78 |
| 1006 | 119.26 | 38.5  | 23.81 | 21.81 | 21.76 |
| 1008 | 119.5  | 38.56 | 23.8  | 21.78 | 21.73 |
| 1010 | 119.78 | 38.64 | 23.83 | 21.78 | 21.73 |
| 1012 | 120.06 | 38.72 | 23.85 | 21.77 | 21.74 |
| 1014 | 120.4  | 38.82 | 23.87 | 21.77 | 21.74 |
| 1016 | 120.71 | 38.91 | 23.92 | 21.79 | 21.77 |
| 1018 | 120.99 | 38.99 | 23.93 | 21.79 | 21.75 |
| 1020 | 121.29 | 39.08 | 23.96 | 21.79 | 21.76 |
| 1022 | 121.65 | 39.18 | 23.99 | 21.8  | 21.77 |
| 1024 | 121.94 | 39.28 | 24.04 | 21.83 | 21.79 |
| 1026 | 122.21 | 39.34 | 24.06 | 21.8  | 21.77 |
| 1028 | 122.51 | 39.42 | 24.1  | 21.83 | 21.78 |
| 1030 | 122.88 | 39.54 | 24.16 | 21.84 | 21.78 |
| 1032 | 123.19 | 39.65 | 24.2  | 21.88 | 21.82 |
| 1034 | 123.47 | 39.73 | 24.22 | 21.88 | 21.82 |
| 1036 | 123.74 | 39.78 | 24.23 | 21.87 | 21.8  |
| 1038 | 124.1  | 39.9  | 24.28 | 21.89 | 21.82 |
| 1040 | 124.41 | 39.99 | 24.32 | 21.89 | 21.82 |
| 1042 | 124.72 | 40.08 | 24.36 | 21.9  | 21.83 |
| 1044 | 125.02 | 40.18 | 24.41 | 21.91 | 21.87 |
| 1046 | 125.31 | 40.25 | 24.4  | 21.87 | 21.84 |

|      |        |       |       |       |       |
|------|--------|-------|-------|-------|-------|
| 1048 | 125.6  | 40.31 | 24.43 | 21.89 | 21.84 |
| 1050 | 125.91 | 40.4  | 24.47 | 21.9  | 21.85 |
| 1052 | 126.23 | 40.49 | 24.53 | 21.92 | 21.87 |
| 1054 | 126.59 | 40.58 | 24.56 | 21.93 | 21.89 |
| 1056 | 126.92 | 40.69 | 24.64 | 21.98 | 21.93 |
| 1058 | 127.17 | 40.73 | 24.61 | 21.94 | 21.88 |
| 1060 | 127.49 | 40.81 | 24.65 | 21.95 | 21.9  |
| 1062 | 127.85 | 40.9  | 24.71 | 21.97 | 21.91 |
| 1064 | 128.17 | 41.03 | 24.78 | 22.01 | 21.95 |
| 1066 | 128.47 | 41.11 | 24.82 | 22.02 | 21.96 |
| 1068 | 128.76 | 41.19 | 24.85 | 22.03 | 21.96 |
| 1070 | 129.1  | 41.29 | 24.89 | 22.04 | 21.97 |
| 1072 | 129.37 | 41.33 | 24.89 | 22    | 21.95 |
| 1074 | 129.67 | 41.41 | 24.92 | 22    | 21.95 |
| 1076 | 130    | 41.5  | 24.97 | 22.02 | 21.97 |
| 1078 | 130.36 | 41.59 | 25.01 | 22.04 | 21.98 |
| 1080 | 130.66 | 41.66 | 25.04 | 22.03 | 21.97 |
| 1082 | 130.95 | 41.74 | 25.08 | 22.04 | 22    |
| 1084 | 131.24 | 41.81 | 25.11 | 22.06 | 22    |
| 1086 | 131.61 | 41.91 | 25.16 | 22.07 | 22.01 |
| 1088 | 131.92 | 42    | 25.21 | 22.09 | 22.03 |
| 1090 | 132.21 | 42.05 | 25.23 | 22.09 | 22.01 |
| 1092 | 132.51 | 42.13 | 25.27 | 22.1  | 22.01 |
| 1094 | 132.85 | 42.18 | 25.27 | 22.08 | 21.99 |
| 1096 | 133.16 | 42.26 | 25.31 | 22.08 | 21.98 |
| 1098 | 133.49 | 42.35 | 25.36 | 22.1  | 22    |
| 1100 | 133.77 | 42.41 | 25.38 | 22.09 | 22    |
| 1102 | 134.13 | 42.48 | 25.42 | 22.1  | 22.01 |
| 1104 | 134.44 | 42.57 | 25.47 | 22.1  | 22.01 |
| 1106 | 134.74 | 42.65 | 25.51 | 22.12 | 22.02 |
| 1108 | 134.98 | 42.67 | 25.49 | 22.07 | 21.97 |
| 1110 | 135.36 | 42.79 | 25.54 | 22.09 | 22.01 |
| 1112 | 135.69 | 42.88 | 25.61 | 22.13 | 22.04 |
| 1114 | 136    | 42.93 | 25.64 | 22.11 | 22.02 |
| 1116 | 136.3  | 43    | 25.68 | 22.12 | 22.03 |
| 1118 | 136.66 | 43.09 | 25.7  | 22.13 | 22.04 |
| 1120 | 136.96 | 43.14 | 25.74 | 22.13 | 22.04 |
| 1122 | 137.3  | 43.24 | 25.8  | 22.17 | 22.06 |
| 1124 | 137.61 | 43.31 | 25.84 | 22.17 | 22.07 |
| 1126 | 137.98 | 43.39 | 25.9  | 22.2  | 22.08 |
| 1128 | 138.31 | 43.48 | 25.95 | 22.23 | 22.09 |
| 1130 | 138.6  | 43.54 | 25.97 | 22.22 | 22.09 |
| 1132 | 138.88 | 43.6  | 26    | 22.22 | 22.09 |
| 1134 | 139.27 | 43.69 | 26.06 | 22.25 | 22.12 |



|      |        |       |       |       |       |
|------|--------|-------|-------|-------|-------|
| 1136 | 139.58 | 43.78 | 26.11 | 22.26 | 22.12 |
| 1138 | 139.87 | 43.85 | 26.15 | 22.25 | 22.12 |
| 1140 | 140.19 | 43.92 | 26.19 | 22.26 | 22.13 |
| 1142 | 140.58 | 44.04 | 26.26 | 22.31 | 22.19 |
| 1144 | 140.82 | 44.05 | 26.26 | 22.27 | 22.15 |
| 1146 | 141.15 | 44.13 | 26.3  | 22.28 | 22.16 |
| 1148 | 141.47 | 44.22 | 26.37 | 22.32 | 22.18 |
| 1150 | 141.83 | 44.27 | 26.4  | 22.31 | 22.19 |
| 1152 | 142.16 | 44.36 | 26.44 | 22.33 | 22.2  |
| 1154 | 142.46 | 44.4  | 26.47 | 22.32 | 22.18 |
| 1156 | 142.78 | 44.48 | 26.53 | 22.36 | 22.21 |
| 1158 | 143.14 | 44.57 | 26.57 | 22.38 | 22.2  |
| 1160 | 143.46 | 44.64 | 26.61 | 22.38 | 22.22 |
| 1162 | 143.77 | 44.69 | 26.66 | 22.39 | 22.23 |
| 1164 | 144.13 | 44.77 | 26.7  | 22.4  | 22.23 |
| 1166 | 144.43 | 44.85 | 26.74 | 22.41 | 22.24 |
| 1168 | 144.72 | 44.91 | 26.8  | 22.42 | 22.25 |
| 1170 | 145.01 | 44.99 | 26.84 | 22.43 | 22.26 |
| 1172 | 145.33 | 45.06 | 26.88 | 22.43 | 22.29 |
| 1174 | 145.69 | 45.12 | 26.92 | 22.43 | 22.28 |
| 1176 | 146.03 | 45.22 | 27    | 22.48 | 22.32 |
| 1178 | 146.34 | 45.26 | 27.01 | 22.46 | 22.3  |
| 1180 | 146.63 | 45.31 | 27.04 | 22.47 | 22.3  |
| 1182 | 146.98 | 45.38 | 27.08 | 22.48 | 22.31 |
| 1184 | 147.31 | 45.49 | 27.15 | 22.5  | 22.33 |
| 1186 | 147.61 | 45.55 | 27.2  | 22.53 | 22.35 |
| 1188 | 147.9  | 45.58 | 27.22 | 22.52 | 22.34 |
| 1190 | 148.29 | 45.69 | 27.28 | 22.57 | 22.37 |
| 1192 | 148.6  | 45.75 | 27.33 | 22.57 | 22.36 |
| 1194 | 148.92 | 45.82 | 27.38 | 22.59 | 22.37 |
| 1196 | 149.26 | 45.89 | 27.41 | 22.59 | 22.38 |
| 1198 | 149.64 | 45.95 | 27.46 | 22.61 | 22.4  |
| 1200 | 149.94 | 46    | 27.49 | 22.6  | 22.38 |
| 1202 | 150.21 | 46.02 | 27.49 | 22.56 | 22.34 |
| 1204 | 150.51 | 46.06 | 27.52 | 22.56 | 22.33 |
| 1206 | 150.87 | 46.15 | 27.57 | 22.59 | 22.36 |
| 1208 | 151.2  | 46.22 | 27.63 | 22.62 | 22.39 |
| 1210 | 151.56 | 46.32 | 27.71 | 22.66 | 22.41 |
| 1212 | 151.81 | 46.34 | 27.7  | 22.63 | 22.37 |
| 1214 | 152.2  | 46.41 | 27.73 | 22.63 | 22.37 |
| 1216 | 152.52 | 46.47 | 27.77 | 22.64 | 22.37 |
| 1218 | 152.86 | 46.54 | 27.82 | 22.66 | 22.38 |
| 1220 | 153.18 | 46.6  | 27.86 | 22.67 | 22.38 |
| 1222 | 153.58 | 46.67 | 27.94 | 22.71 | 22.42 |

|      |        |       |       |       |       |
|------|--------|-------|-------|-------|-------|
| 1224 | 153.92 | 46.78 | 28.01 | 22.75 | 22.46 |
| 1226 | 154.24 | 46.83 | 28.06 | 22.76 | 22.47 |
| 1228 | 154.55 | 46.89 | 28.09 | 22.76 | 22.46 |
| 1230 | 154.89 | 46.93 | 28.11 | 22.75 | 22.44 |
| 1232 | 155.18 | 47    | 28.15 | 22.76 | 22.45 |
| 1234 | 155.53 | 47.09 | 28.22 | 22.8  | 22.48 |
| 1236 | 155.88 | 47.17 | 28.28 | 22.83 | 22.51 |
| 1238 | 156.26 | 47.24 | 28.33 | 22.84 | 22.52 |
| 1240 | 156.59 | 47.3  | 28.38 | 22.87 | 22.52 |
| 1242 | 156.92 | 47.36 | 28.42 | 22.88 | 22.53 |
| 1244 | 157.24 | 47.42 | 28.46 | 22.89 | 22.53 |
| 1246 | 157.63 | 47.5  | 28.54 | 22.92 | 22.56 |
| 1248 | 157.94 | 47.59 | 28.61 | 22.97 | 22.61 |
| 1250 | 158.26 | 47.63 | 28.63 | 22.95 | 22.57 |
| 1252 | 158.58 | 47.69 | 28.66 | 22.95 | 22.57 |
| 1254 | 158.92 | 47.71 | 28.67 | 22.93 | 22.55 |
| 1256 | 159.28 | 47.8  | 28.74 | 22.98 | 22.59 |
| 1258 | 159.65 | 47.89 | 28.82 | 23.02 | 22.62 |
| 1260 | 159.99 | 47.91 | 28.83 | 23    | 22.6  |
| 1262 | 160.32 | 47.97 | 28.87 | 23    | 22.6  |
| 1264 | 160.67 | 48.07 | 28.94 | 23.04 | 22.64 |
| 1266 | 160.99 | 48.12 | 28.98 | 23.07 | 22.64 |
| 1268 | 161.3  | 48.18 | 29.03 | 23.09 | 22.65 |
| 1270 | 161.66 | 48.22 | 29.05 | 23.07 | 22.65 |
| 1272 | 161.96 | 48.27 | 29.09 | 23.07 | 22.64 |
| 1274 | 162.26 | 48.32 | 29.1  | 23.05 | 22.63 |
| 1276 | 162.59 | 48.39 | 29.17 | 23.08 | 22.66 |
| 1278 | 162.98 | 48.45 | 29.22 | 23.1  | 22.66 |
| 1280 | 163.31 | 48.52 | 29.27 | 23.11 | 22.67 |
| 1282 | 163.63 | 48.58 | 29.31 | 23.13 | 22.67 |
| 1284 | 163.91 | 48.6  | 29.32 | 23.1  | 22.65 |
| 1286 | 164.28 | 48.64 | 29.34 | 23.08 | 22.64 |
| 1288 | 164.64 | 48.76 | 29.44 | 23.15 | 22.68 |
| 1290 | 164.94 | 48.79 | 29.47 | 23.16 | 22.68 |
| 1292 | 165.26 | 48.84 | 29.52 | 23.19 | 22.68 |
| 1294 | 165.66 | 48.94 | 29.6  | 23.23 | 22.73 |
| 1296 | 165.97 | 49    | 29.64 | 23.24 | 22.72 |
| 1298 | 166.29 | 49.05 | 29.67 | 23.24 | 22.72 |
| 1300 | 166.64 | 49.12 | 29.71 | 23.27 | 22.72 |
| 1302 | 166.99 | 49.14 | 29.74 | 23.26 | 22.72 |
| 1304 | 167.32 | 49.21 | 29.79 | 23.28 | 22.73 |
| 1306 | 167.62 | 49.25 | 29.83 | 23.28 | 22.74 |
| 1308 | 167.94 | 49.31 | 29.87 | 23.28 | 22.76 |
| 1310 | 168.34 | 49.42 | 29.94 | 23.32 | 22.77 |

|      |        |       |       |       |       |
|------|--------|-------|-------|-------|-------|
| 1312 | 168.66 | 49.48 | 30    | 23.36 | 22.79 |
| 1314 | 169    | 49.56 | 30.07 | 23.39 | 22.81 |
| 1316 | 169.3  | 49.6  | 30.09 | 23.38 | 22.8  |
| 1318 | 169.69 | 49.65 | 30.14 | 23.39 | 22.81 |
| 1320 | 170.01 | 49.7  | 30.19 | 23.41 | 22.82 |
| 1322 | 170.34 | 49.77 | 30.24 | 23.44 | 22.83 |
| 1324 | 170.66 | 49.81 | 30.27 | 23.45 | 22.81 |
| 1326 | 171.01 | 49.86 | 30.3  | 23.46 | 22.81 |
| 1328 | 171.35 | 49.92 | 30.37 | 23.49 | 22.84 |
| 1330 | 171.63 | 49.94 | 30.38 | 23.45 | 22.79 |
| 1332 | 171.98 | 50.04 | 30.46 | 23.52 | 22.85 |
| 1334 | 172.34 | 50.09 | 30.49 | 23.52 | 22.84 |
| 1336 | 172.67 | 50.15 | 30.54 | 23.55 | 22.86 |
| 1338 | 172.99 | 50.2  | 30.58 | 23.55 | 22.86 |
| 1340 | 173.39 | 50.28 | 30.63 | 23.58 | 22.89 |
| 1342 | 173.73 | 50.33 | 30.69 | 23.61 | 22.9  |
| 1344 | 174.06 | 50.39 | 30.73 | 23.62 | 22.91 |
| 1346 | 174.38 | 50.45 | 30.78 | 23.64 | 22.91 |
| 1348 | 174.7  | 50.5  | 30.82 | 23.65 | 22.93 |
| 1350 | 175.09 | 50.57 | 30.88 | 23.69 | 22.95 |
| 1352 | 175.41 | 50.64 | 30.94 | 23.71 | 22.97 |
| 1354 | 175.7  | 50.68 | 30.97 | 23.7  | 22.95 |
| 1356 | 176    | 50.72 | 31    | 23.72 | 22.95 |
| 1358 | 176.44 | 50.84 | 31.1  | 23.78 | 23.02 |
| 1360 | 176.72 | 50.84 | 31.09 | 23.74 | 22.98 |
| 1362 | 177.04 | 50.88 | 31.12 | 23.75 | 22.97 |
| 1364 | 177.37 | 50.93 | 31.17 | 23.77 | 22.98 |
| 1366 | 177.75 | 50.99 | 31.22 | 23.79 | 23    |
| 1368 | 178.06 | 51.07 | 31.27 | 23.82 | 23.03 |
| 1370 | 178.37 | 51.11 | 31.31 | 23.84 | 23.01 |
| 1372 | 178.69 | 51.17 | 31.36 | 23.86 | 23.04 |
| 1374 | 179.09 | 51.21 | 31.41 | 23.88 | 23.05 |
| 1376 | 179.44 | 51.29 | 31.48 | 23.92 | 23.08 |
| 1378 | 179.76 | 51.33 | 31.51 | 23.92 | 23.07 |
| 1380 | 180.11 | 51.41 | 31.56 | 23.96 | 23.09 |
| 1382 | 180.48 | 51.44 | 31.59 | 23.96 | 23.08 |
| 1384 | 180.79 | 51.47 | 31.64 | 23.98 | 23.07 |
| 1386 | 181.13 | 51.53 | 31.69 | 24.01 | 23.1  |
| 1388 | 181.46 | 51.58 | 31.76 | 24.05 | 23.12 |
| 1390 | 181.79 | 51.61 | 31.77 | 24.04 | 23.1  |
| 1392 | 182.1  | 51.66 | 31.79 | 24.04 | 23.09 |
| 1394 | 182.38 | 51.68 | 31.81 | 24.03 | 23.08 |
| 1396 | 182.75 | 51.76 | 31.89 | 24.07 | 23.1  |
| 1398 | 183.14 | 51.81 | 31.93 | 24.09 | 23.11 |

|      |        |       |       |       |       |
|------|--------|-------|-------|-------|-------|
| 1400 | 183.46 | 51.85 | 31.94 | 24.07 | 23.1  |
| 1402 | 183.81 | 51.92 | 32.01 | 24.1  | 23.14 |
| 1404 | 184.13 | 51.97 | 32.06 | 24.12 | 23.14 |
| 1406 | 184.42 | 51.99 | 32.07 | 24.12 | 23.13 |
| 1408 | 184.77 | 52.04 | 32.1  | 24.11 | 23.11 |
| 1410 | 185.08 | 52.06 | 32.13 | 24.13 | 23.12 |
| 1412 | 185.42 | 52.12 | 32.17 | 24.15 | 23.12 |
| 1414 | 185.82 | 52.16 | 32.22 | 24.16 | 23.13 |
| 1416 | 186.16 | 52.22 | 32.27 | 24.18 | 23.14 |
| 1418 | 186.51 | 52.27 | 32.31 | 24.21 | 23.15 |
| 1420 | 186.89 | 52.36 | 32.41 | 24.28 | 23.2  |
| 1422 | 187.28 | 52.42 | 32.44 | 24.31 | 23.2  |
| 1424 | 187.59 | 52.45 | 32.48 | 24.33 | 23.21 |
| 1426 | 187.93 | 52.5  | 32.54 | 24.35 | 23.22 |
| 1428 | 188.34 | 52.57 | 32.61 | 24.39 | 23.26 |
| 1430 | 188.66 | 52.65 | 32.66 | 24.41 | 23.27 |
| 1432 | 188.94 | 52.68 | 32.68 | 24.41 | 23.26 |
| 1434 | 189.24 | 52.7  | 32.7  | 24.41 | 23.25 |
| 1436 | 189.58 | 52.76 | 32.75 | 24.44 | 23.26 |
| 1438 | 189.94 | 52.77 | 32.76 | 24.41 | 23.22 |
| 1440 | 190.28 | 52.83 | 32.81 | 24.44 | 23.25 |
| 1442 | 190.58 | 52.87 | 32.84 | 24.42 | 23.22 |
| 1444 | 190.93 | 52.94 | 32.9  | 24.47 | 23.25 |
| 1446 | 191.3  | 52.99 | 32.95 | 24.48 | 23.26 |
| 1448 | 191.6  | 53.04 | 32.99 | 24.48 | 23.27 |
| 1450 | 191.97 | 53.13 | 33.06 | 24.54 | 23.32 |
| 1452 | 192.28 | 53.17 | 33.12 | 24.58 | 23.33 |
| 1454 | 192.6  | 53.21 | 33.14 | 24.59 | 23.33 |
| 1456 | 193.03 | 53.3  | 33.23 | 24.66 | 23.37 |
| 1458 | 193.36 | 53.35 | 33.27 | 24.66 | 23.38 |
| 1460 | 193.67 | 53.39 | 33.3  | 24.67 | 23.39 |
| 1462 | 194.07 | 53.47 | 33.38 | 24.73 | 23.43 |
| 1464 | 194.4  | 53.52 | 33.44 | 24.76 | 23.44 |
| 1466 | 194.73 | 53.56 | 33.48 | 24.78 | 23.43 |
| 1468 | 195.06 | 53.61 | 33.54 | 24.82 | 23.46 |
| 1470 | 195.43 | 53.67 | 33.58 | 24.84 | 23.47 |
| 1472 | 195.76 | 53.72 | 33.62 | 24.86 | 23.48 |
| 1474 | 196.1  | 53.77 | 33.67 | 24.89 | 23.49 |
| 1476 | 196.49 | 53.82 | 33.73 | 24.92 | 23.5  |
| 1478 | 196.82 | 53.85 | 33.75 | 24.91 | 23.48 |
| 1480 | 197.13 | 53.9  | 33.8  | 24.93 | 23.51 |
| 1482 | 197.44 | 53.96 | 33.84 | 24.95 | 23.53 |
| 1484 | 197.76 | 54.02 | 33.88 | 24.96 | 23.53 |
| 1486 | 198.14 | 54.06 | 33.92 | 24.98 | 23.53 |

|      |        |       |       |       |       |
|------|--------|-------|-------|-------|-------|
| 1488 | 198.48 | 54.11 | 33.99 | 25.02 | 23.55 |
| 1490 | 198.82 | 54.15 | 34.02 | 25.04 | 23.56 |
| 1492 | 199.17 | 54.19 | 34.07 | 25.06 | 23.57 |
| 1494 | 199.59 | 54.23 | 34.11 | 25.07 | 23.58 |
| 1496 | 199.95 | 54.29 | 34.17 | 25.11 | 23.59 |
| 1498 | 200.3  | 54.34 | 34.22 | 25.15 | 23.59 |
| 1500 | 200.64 | 54.39 | 34.26 | 25.17 | 23.61 |
| 1502 | 201.03 | 54.43 | 34.29 | 25.18 | 23.61 |
| 1504 | 201.36 | 54.48 | 34.35 | 25.21 | 23.62 |
| 1506 | 201.66 | 54.51 | 34.39 | 25.22 | 23.62 |
| 1508 | 202    | 54.57 | 34.45 | 25.24 | 23.64 |
| 1510 | 202.34 | 54.61 | 34.49 | 25.26 | 23.66 |
| 1512 | 202.74 | 54.67 | 34.53 | 25.27 | 23.67 |
| 1514 | 203.09 | 54.69 | 34.54 | 25.25 | 23.63 |
| 1516 | 203.47 | 54.75 | 34.6  | 25.31 | 23.67 |
| 1518 | 203.89 | 54.8  | 34.65 | 25.34 | 23.69 |
| 1520 | 204.22 | 54.83 | 34.68 | 25.36 | 23.69 |
| 1522 | 204.53 | 54.86 | 34.7  | 25.36 | 23.68 |
| 1524 | 204.87 | 54.89 | 34.74 | 25.37 | 23.68 |
| 1526 | 205.29 | 54.95 | 34.8  | 25.4  | 23.7  |
| 1528 | 205.61 | 54.98 | 34.83 | 25.42 | 23.69 |
| 1530 | 205.95 | 55.02 | 34.87 | 25.44 | 23.69 |
| 1532 | 206.29 | 55.07 | 34.92 | 25.47 | 23.7  |
| 1534 | 206.72 | 55.12 | 34.96 | 25.49 | 23.7  |
| 1536 | 207.08 | 55.17 | 34.99 | 25.51 | 23.71 |
| 1538 | 207.44 | 55.21 | 35.05 | 25.54 | 23.73 |
| 1540 | 207.75 | 55.22 | 35.05 | 25.51 | 23.7  |
| 1542 | 208.18 | 55.31 | 35.11 | 25.54 | 23.72 |
| 1544 | 208.51 | 55.36 | 35.17 | 25.56 | 23.74 |
| 1546 | 208.84 | 55.42 | 35.21 | 25.6  | 23.77 |
| 1548 | 209.19 | 55.48 | 35.28 | 25.66 | 23.8  |
| 1550 | 209.59 | 55.51 | 35.31 | 25.67 | 23.8  |
| 1552 | 209.95 | 55.56 | 35.35 | 25.68 | 23.8  |
| 1554 | 210.31 | 55.6  | 35.4  | 25.7  | 23.82 |
| 1556 | 210.68 | 55.64 | 35.44 | 25.72 | 23.83 |
| 1558 | 211.05 | 55.69 | 35.49 | 25.76 | 23.84 |
| 1560 | 211.47 | 55.75 | 35.55 | 25.81 | 23.86 |
| 1562 | 211.86 | 55.82 | 35.63 | 25.86 | 23.89 |
| 1564 | 212.19 | 55.86 | 35.67 | 25.88 | 23.9  |
| 1566 | 212.63 | 55.92 | 35.73 | 25.91 | 23.93 |
| 1568 | 212.93 | 55.94 | 35.74 | 25.91 | 23.91 |
| 1570 | 213.27 | 56    | 35.78 | 25.92 | 23.92 |
| 1572 | 213.65 | 56.07 | 35.86 | 25.97 | 23.95 |
| 1574 | 214.08 | 56.13 | 35.9  | 25.99 | 23.97 |

|      |        |       |       |       |       |
|------|--------|-------|-------|-------|-------|
| 1576 | 214.41 | 56.15 | 35.92 | 25.97 | 23.96 |
| 1578 | 214.8  | 56.22 | 35.99 | 26.04 | 24.01 |
| 1580 | 215.15 | 56.27 | 36.04 | 26.07 | 24.02 |
| 1582 | 215.49 | 56.32 | 36.07 | 26.1  | 24.03 |
| 1584 | 215.85 | 56.33 | 36.08 | 26.08 | 24.01 |
| 1586 | 216.2  | 56.38 | 36.13 | 26.11 | 24.02 |
| 1588 | 216.58 | 56.44 | 36.2  | 26.15 | 24.05 |
| 1590 | 217.03 | 56.5  | 36.26 | 26.21 | 24.08 |
| 1592 | 217.4  | 56.55 | 36.32 | 26.25 | 24.09 |
| 1594 | 217.75 | 56.6  | 36.36 | 26.28 | 24.1  |
| 1596 | 218.11 | 56.65 | 36.4  | 26.3  | 24.11 |
| 1598 | 218.51 | 56.69 | 36.44 | 26.32 | 24.13 |
| 1600 | 218.86 | 56.73 | 36.49 | 26.34 | 24.13 |
| 1602 | 219.23 | 56.79 | 36.54 | 26.37 | 24.16 |
| 1604 | 219.55 | 56.81 | 36.56 | 26.39 | 24.15 |
| 1606 | 219.94 | 56.83 | 36.57 | 26.37 | 24.13 |
| 1608 | 220.33 | 56.9  | 36.63 | 26.4  | 24.17 |
| 1610 | 220.68 | 56.92 | 36.65 | 26.41 | 24.15 |
| 1612 | 221.08 | 56.98 | 36.71 | 26.46 | 24.18 |
| 1614 | 221.53 | 57.04 | 36.77 | 26.5  | 24.21 |
| 1616 | 221.88 | 57.07 | 36.81 | 26.51 | 24.2  |
| 1618 | 222.23 | 57.12 | 36.84 | 26.52 | 24.23 |
| 1620 | 222.59 | 57.15 | 36.89 | 26.56 | 24.23 |
| 1622 | 223.01 | 57.2  | 36.95 | 26.6  | 24.24 |
| 1624 | 223.35 | 57.23 | 36.97 | 26.62 | 24.24 |
| 1626 | 223.69 | 57.28 | 37    | 26.63 | 24.24 |
| 1628 | 224.09 | 57.32 | 37.06 | 26.66 | 24.25 |
| 1630 | 224.53 | 57.35 | 37.09 | 26.68 | 24.26 |
| 1632 | 224.92 | 57.42 | 37.16 | 26.73 | 24.3  |
| 1634 | 225.29 | 57.45 | 37.19 | 26.74 | 24.3  |
| 1636 | 225.66 | 57.51 | 37.25 | 26.77 | 24.33 |
| 1638 | 226.09 | 57.56 | 37.27 | 26.79 | 24.34 |
| 1640 | 226.45 | 57.61 | 37.34 | 26.83 | 24.36 |
| 1642 | 226.8  | 57.67 | 37.39 | 26.87 | 24.4  |
| 1644 | 227.24 | 57.72 | 37.45 | 26.9  | 24.42 |
| 1646 | 227.62 | 57.74 | 37.46 | 26.9  | 24.41 |
| 1648 | 227.99 | 57.77 | 37.49 | 26.92 | 24.4  |
| 1650 | 228.39 | 57.83 | 37.56 | 26.96 | 24.43 |
| 1652 | 228.79 | 57.88 | 37.62 | 27.02 | 24.47 |
| 1654 | 229.17 | 57.92 | 37.66 | 27.04 | 24.48 |
| 1656 | 229.58 | 57.98 | 37.71 | 27.07 | 24.49 |
| 1658 | 229.95 | 58.04 | 37.77 | 27.12 | 24.54 |
| 1660 | 230.36 | 58.07 | 37.8  | 27.12 | 24.53 |
| 1662 | 230.74 | 58.11 | 37.85 | 27.16 | 24.55 |

|      |        |       |       |       |       |
|------|--------|-------|-------|-------|-------|
| 1664 | 231.11 | 58.14 | 37.89 | 27.18 | 24.55 |
| 1666 | 231.51 | 58.19 | 37.95 | 27.23 | 24.58 |
| 1668 | 231.97 | 58.23 | 37.98 | 27.24 | 24.58 |
| 1670 | 232.37 | 58.3  | 38.03 | 27.29 | 24.6  |
| 1672 | 232.72 | 58.32 | 38.07 | 27.3  | 24.59 |
| 1674 | 233.1  | 58.36 | 38.11 | 27.33 | 24.61 |
| 1676 | 233.49 | 58.4  | 38.16 | 27.36 | 24.62 |
| 1678 | 233.91 | 58.44 | 38.2  | 27.38 | 24.63 |
| 1680 | 234.27 | 58.49 | 38.24 | 27.4  | 24.65 |
| 1682 | 234.63 | 58.53 | 38.29 | 27.43 | 24.66 |
| 1684 | 235.01 | 58.57 | 38.33 | 27.46 | 24.68 |
| 1686 | 235.44 | 58.58 | 38.34 | 27.45 | 24.64 |
| 1688 | 235.83 | 58.6  | 38.35 | 27.45 | 24.63 |
| 1690 | 236.22 | 58.65 | 38.39 | 27.47 | 24.65 |
| 1692 | 236.6  | 58.69 | 38.43 | 27.51 | 24.66 |
| 1694 | 237.04 | 58.73 | 38.47 | 27.53 | 24.67 |
| 1696 | 237.39 | 58.76 | 38.5  | 27.54 | 24.66 |
| 1698 | 237.79 | 58.81 | 38.55 | 27.56 | 24.69 |
| 1700 | 238.12 | 58.82 | 38.56 | 27.56 | 24.69 |
| 1702 | 238.57 | 58.86 | 38.61 | 27.6  | 24.7  |
| 1704 | 238.94 | 58.87 | 38.63 | 27.59 | 24.69 |
| 1706 | 239.34 | 58.91 | 38.66 | 27.62 | 24.69 |
| 1708 | 239.75 | 58.95 | 38.71 | 27.64 | 24.7  |
| 1710 | 240.22 | 59    | 38.76 | 27.67 | 24.72 |
| 1712 | 240.63 | 59.07 | 38.83 | 27.73 | 24.76 |
| 1714 | 241.01 | 59.1  | 38.85 | 27.76 | 24.77 |
| 1716 | 241.44 | 59.17 | 38.93 | 27.81 | 24.82 |
| 1718 | 241.89 | 59.21 | 38.98 | 27.83 | 24.82 |
| 1720 | 242.27 | 59.28 | 39.04 | 27.88 | 24.85 |
| 1722 | 242.68 | 59.36 | 39.11 | 27.94 | 24.91 |
| 1724 | 243.06 | 59.37 | 39.12 | 27.94 | 24.89 |
| 1726 | 243.53 | 59.41 | 39.16 | 27.96 | 24.9  |
| 1728 | 243.93 | 59.45 | 39.19 | 27.98 | 24.9  |
| 1730 | 244.32 | 59.5  | 39.24 | 27.99 | 24.92 |
| 1732 | 244.71 | 59.54 | 39.28 | 28.01 | 24.94 |
| 1734 | 245.15 | 59.6  | 39.32 | 28.06 | 24.97 |
| 1736 | 245.52 | 59.63 | 39.36 | 28.08 | 24.97 |
| 1738 | 245.89 | 59.66 | 39.4  | 28.11 | 24.98 |
| 1740 | 246.29 | 59.7  | 39.44 | 28.12 | 24.99 |
| 1742 | 246.75 | 59.72 | 39.46 | 28.13 | 24.99 |
| 1744 | 247.19 | 59.78 | 39.53 | 28.18 | 25.02 |
| 1746 | 247.63 | 59.84 | 39.59 | 28.26 | 25.07 |
| 1748 | 248.08 | 59.91 | 39.65 | 28.3  | 25.09 |
| 1750 | 248.51 | 59.93 | 39.66 | 28.3  | 25.07 |

|      |        |       |       |       |       |
|------|--------|-------|-------|-------|-------|
| 1752 | 248.91 | 59.96 | 39.7  | 28.32 | 25.09 |
| 1754 | 249.3  | 60    | 39.74 | 28.34 | 25.1  |
| 1756 | 249.75 | 60.04 | 39.79 | 28.37 | 25.11 |
| 1758 | 250.11 | 60.08 | 39.82 | 28.38 | 25.11 |
| 1760 | 250.51 | 60.13 | 39.86 | 28.4  | 25.12 |
| 1762 | 250.91 | 60.16 | 39.9  | 28.43 | 25.14 |
| 1764 | 251.34 | 60.2  | 39.95 | 28.46 | 25.16 |
| 1766 | 251.74 | 60.22 | 39.97 | 28.47 | 25.17 |
| 1768 | 252.23 | 60.29 | 40.03 | 28.51 | 25.18 |
| 1770 | 252.67 | 60.36 | 40.1  | 28.58 | 25.23 |
| 1772 | 253.06 | 60.41 | 40.16 | 28.63 | 25.26 |
| 1774 | 253.52 | 60.45 | 40.18 | 28.63 | 25.25 |
| 1776 | 253.91 | 60.47 | 40.22 | 28.66 | 25.26 |
| 1778 | 254.29 | 60.49 | 40.22 | 28.66 | 25.24 |
| 1780 | 254.82 | 60.58 | 40.33 | 28.76 | 25.32 |
| 1782 | 255.21 | 60.61 | 40.35 | 28.76 | 25.3  |
| 1784 | 255.63 | 60.64 | 40.39 | 28.78 | 25.3  |
| 1786 | 256.05 | 60.69 | 40.44 | 28.81 | 25.33 |
| 1788 | 256.44 | 60.71 | 40.46 | 28.84 | 25.34 |
| 1790 | 256.92 | 60.77 | 40.53 | 28.87 | 25.36 |
| 1792 | 257.28 | 60.79 | 40.54 | 28.87 | 25.36 |
| 1794 | 257.67 | 60.85 | 40.61 | 28.92 | 25.4  |
| 1796 | 258.09 | 60.91 | 40.66 | 28.96 | 25.44 |
| 1798 | 258.59 | 60.96 | 40.71 | 28.99 | 25.46 |
| 1800 | 259.01 | 60.98 | 40.75 | 29.01 | 25.44 |
| 1802 | 259.46 | 61.04 | 40.8  | 29.06 | 25.47 |
| 1804 | 259.86 | 61.05 | 40.81 | 29.06 | 25.47 |
| 1806 | 260.37 | 61.11 | 40.86 | 29.09 | 25.5  |
| 1808 | 260.79 | 61.17 | 40.92 | 29.14 | 25.53 |
| 1810 | 261.19 | 61.21 | 40.96 | 29.18 | 25.55 |
| 1812 | 261.63 | 61.29 | 41.05 | 29.25 | 25.59 |
| 1814 | 262.07 | 61.32 | 41.08 | 29.25 | 25.58 |
| 1816 | 262.45 | 61.34 | 41.11 | 29.29 | 25.6  |
| 1818 | 262.85 | 61.38 | 41.14 | 29.31 | 25.6  |
| 1820 | 263.28 | 61.41 | 41.17 | 29.33 | 25.61 |
| 1822 | 263.78 | 61.45 | 41.21 | 29.35 | 25.63 |
| 1824 | 264.19 | 61.49 | 41.25 | 29.38 | 25.64 |
| 1826 | 264.65 | 61.56 | 41.32 | 29.43 | 25.69 |
| 1828 | 265.07 | 61.62 | 41.36 | 29.47 | 25.7  |
| 1830 | 265.46 | 61.67 | 41.41 | 29.49 | 25.71 |
| 1832 | 265.9  | 61.68 | 41.44 | 29.51 | 25.7  |
| 1834 | 266.31 | 61.73 | 41.49 | 29.55 | 25.74 |
| 1836 | 266.69 | 61.75 | 41.5  | 29.55 | 25.73 |
| 1838 | 267.18 | 61.78 | 41.53 | 29.58 | 25.74 |



|      |        |       |       |       |       |
|------|--------|-------|-------|-------|-------|
| 1840 | 267.62 | 61.82 | 41.58 | 29.61 | 25.76 |
| 1842 | 268.07 | 61.87 | 41.62 | 29.65 | 25.77 |
| 1844 | 268.49 | 61.89 | 41.65 | 29.67 | 25.76 |
| 1846 | 268.96 | 61.91 | 41.69 | 29.69 | 25.78 |
| 1848 | 269.36 | 61.93 | 41.7  | 29.69 | 25.78 |
| 1850 | 269.77 | 61.97 | 41.75 | 29.72 | 25.79 |
| 1852 | 270.17 | 62    | 41.78 | 29.74 | 25.79 |
| 1854 | 270.57 | 62.03 | 41.82 | 29.77 | 25.8  |
| 1856 | 271.06 | 62.09 | 41.87 | 29.81 | 25.82 |
| 1858 | 271.5  | 62.13 | 41.91 | 29.84 | 25.83 |
| 1860 | 271.94 | 62.17 | 41.94 | 29.87 | 25.85 |
| 1862 | 272.46 | 62.2  | 41.98 | 29.9  | 25.86 |
| 1864 | 272.92 | 62.27 | 42.06 | 29.94 | 25.88 |
| 1866 | 273.36 | 62.33 | 42.12 | 29.98 | 25.93 |
| 1868 | 273.75 | 62.35 | 42.13 | 29.99 | 25.92 |
| 1870 | 274.18 | 62.37 | 42.13 | 29.98 | 25.92 |
| 1872 | 274.59 | 62.41 | 42.18 | 30.01 | 25.94 |
| 1874 | 275    | 62.43 | 42.21 | 30.03 | 25.95 |
| 1876 | 275.47 | 62.48 | 42.27 | 30.09 | 25.98 |
| 1878 | 276.01 | 62.53 | 42.32 | 30.11 | 25.99 |
| 1880 | 276.46 | 62.57 | 42.36 | 30.15 | 26.01 |
| 1882 | 276.89 | 62.59 | 42.39 | 30.16 | 26.02 |
| 1884 | 277.34 | 62.62 | 42.43 | 30.2  | 26.03 |
| 1886 | 277.85 | 62.67 | 42.47 | 30.24 | 26.05 |
| 1888 | 278.28 | 62.71 | 42.52 | 30.27 | 26.06 |
| 1890 | 278.7  | 62.75 | 42.56 | 30.3  | 26.08 |
| 1892 | 279.14 | 62.81 | 42.62 | 30.35 | 26.11 |
| 1894 | 279.65 | 62.86 | 42.66 | 30.38 | 26.13 |
| 1896 | 280.12 | 62.92 | 42.72 | 30.42 | 26.15 |
| 1898 | 280.6  | 62.96 | 42.77 | 30.47 | 26.19 |
| 1900 | 281.13 | 63    | 42.82 | 30.5  | 26.21 |
| 1902 | 281.58 | 63.05 | 42.86 | 30.53 | 26.23 |
| 1904 | 282.02 | 63.08 | 42.89 | 30.54 | 26.25 |
| 1906 | 282.44 | 63.11 | 42.92 | 30.57 | 26.23 |
| 1908 | 282.87 | 63.14 | 42.97 | 30.59 | 26.25 |
| 1910 | 283.37 | 63.19 | 43.02 | 30.64 | 26.28 |
| 1912 | 283.78 | 63.22 | 43.04 | 30.65 | 26.29 |
| 1914 | 284.24 | 63.28 | 43.1  | 30.7  | 26.31 |
| 1916 | 284.7  | 63.31 | 43.12 | 30.71 | 26.31 |
| 1918 | 285.27 | 63.35 | 43.16 | 30.75 | 26.34 |
| 1920 | 285.73 | 63.41 | 43.22 | 30.78 | 26.36 |
| 1922 | 286.18 | 63.45 | 43.26 | 30.81 | 26.38 |
| 1924 | 286.64 | 63.49 | 43.3  | 30.84 | 26.39 |
| 1926 | 287.16 | 63.55 | 43.35 | 30.88 | 26.42 |

|      |        |       |       |       |       |
|------|--------|-------|-------|-------|-------|
| 1928 | 287.58 | 63.57 | 43.39 | 30.91 | 26.43 |
| 1930 | 288.01 | 63.6  | 43.42 | 30.93 | 26.43 |
| 1932 | 288.46 | 63.65 | 43.46 | 30.95 | 26.44 |
| 1934 | 288.99 | 63.69 | 43.5  | 30.99 | 26.46 |
| 1936 | 289.48 | 63.73 | 43.54 | 31.02 | 26.49 |
| 1938 | 289.97 | 63.8  | 43.61 | 31.08 | 26.54 |
| 1940 | 290.46 | 63.85 | 43.67 | 31.11 | 26.55 |
| 1942 | 291    | 63.91 | 43.72 | 31.15 | 26.57 |
| 1944 | 291.41 | 63.9  | 43.7  | 31.13 | 26.55 |
| 1946 | 291.84 | 63.92 | 43.73 | 31.15 | 26.55 |
| 1948 | 292.27 | 63.96 | 43.77 | 31.18 | 26.56 |
| 1950 | 292.75 | 63.99 | 43.8  | 31.19 | 26.57 |
| 1952 | 293.21 | 64.05 | 43.84 | 31.23 | 26.59 |
| 1954 | 293.67 | 64.07 | 43.86 | 31.23 | 26.59 |
| 1956 | 294.11 | 64.07 | 43.86 | 31.21 | 26.57 |
| 1958 | 294.6  | 64.11 | 43.9  | 31.25 | 26.6  |
| 1960 | 295.16 | 64.17 | 43.96 | 31.27 | 26.61 |
| 1962 | 295.59 | 64.2  | 43.98 | 31.3  | 26.62 |
| 1964 | 296.02 | 64.23 | 44.01 | 31.32 | 26.63 |
| 1966 | 296.51 | 64.26 | 44.04 | 31.35 | 26.65 |
| 1968 | 296.98 | 64.31 | 44.09 | 31.39 | 26.68 |
| 1970 | 297.43 | 64.35 | 44.13 | 31.42 | 26.69 |
| 1972 | 297.91 | 64.39 | 44.18 | 31.46 | 26.71 |
| 1974 | 298.5  | 64.44 | 44.22 | 31.5  | 26.73 |
| 1976 | 299.01 | 64.48 | 44.26 | 31.53 | 26.73 |
| 1978 | 299.5  | 64.53 | 44.32 | 31.57 | 26.76 |
| 1980 | 299.97 | 64.56 | 44.34 | 31.58 | 26.77 |
| 1982 | 300.52 | 64.6  | 44.39 | 31.62 | 26.8  |
| 1984 | 300.96 | 64.63 | 44.42 | 31.64 | 26.81 |
| 1986 | 301.44 | 64.68 | 44.49 | 31.67 | 26.82 |
| 1988 | 301.88 | 64.72 | 44.51 | 31.69 | 26.83 |
| 1990 | 302.4  | 64.77 | 44.55 | 31.72 | 26.85 |
| 1992 | 302.9  | 64.84 | 44.62 | 31.77 | 26.89 |
| 1994 | 303.37 | 64.84 | 44.62 | 31.77 | 26.88 |
| 1996 | 303.98 | 64.92 | 44.71 | 31.84 | 26.93 |
| 1998 | 304.35 | 64.94 | 44.72 | 31.84 | 26.93 |
| 2000 | 304.91 | 65.01 | 44.78 | 31.9  | 26.98 |
| 2002 | 305.36 | 65.07 | 44.83 | 31.93 | 27.01 |
| 2004 | 305.84 | 65.14 | 44.9  | 32    | 27.05 |
| 2006 | 306.3  | 65.21 | 44.96 | 32.04 | 27.08 |
| 2008 | 306.83 | 65.24 | 44.99 | 32.06 | 27.09 |
| 2010 | 307.29 | 65.23 | 44.99 | 32.05 | 27.07 |
| 2012 | 307.8  | 65.26 | 45.03 | 32.07 | 27.07 |
| 2014 | 308.34 | 65.31 | 45.08 | 32.11 | 27.11 |

|      |        |       |       |       |       |
|------|--------|-------|-------|-------|-------|
| 2016 | 308.91 | 65.35 | 45.11 | 32.13 | 27.1  |
| 2018 | 309.39 | 65.39 | 45.15 | 32.16 | 27.12 |
| 2020 | 309.88 | 65.43 | 45.19 | 32.18 | 27.13 |
| 2022 | 310.42 | 65.47 | 45.22 | 32.21 | 27.15 |
| 2024 | 310.87 | 65.52 | 45.25 | 32.24 | 27.15 |
| 2026 | 311.3  | 65.55 | 45.28 | 32.26 | 27.17 |
| 2028 | 311.72 | 65.57 | 45.29 | 32.27 | 27.16 |
| 2030 | 312.31 | 65.61 | 45.35 | 32.3  | 27.18 |
| 2032 | 312.81 | 65.63 | 45.36 | 32.3  | 27.16 |
| 2034 | 313.33 | 65.66 | 45.39 | 32.33 | 27.17 |
| 2036 | 313.88 | 65.72 | 45.46 | 32.37 | 27.2  |
| 2038 | 314.47 | 65.75 | 45.49 | 32.39 | 27.21 |
| 2040 | 315.01 | 65.84 | 45.57 | 32.47 | 27.26 |
| 2042 | 315.48 | 65.88 | 45.6  | 32.49 | 27.28 |
| 2044 | 315.93 | 65.91 | 45.63 | 32.51 | 27.29 |
| 2046 | 316.47 | 65.97 | 45.68 | 32.56 | 27.32 |
| 2048 | 316.89 | 65.99 | 45.69 | 32.55 | 27.31 |
| 2050 | 317.39 | 66.05 | 45.75 | 32.6  | 27.33 |
| 2052 | 317.87 | 66.08 | 45.78 | 32.62 | 27.34 |
| 2054 | 318.47 | 66.09 | 45.79 | 32.62 | 27.34 |
| 2056 | 319.04 | 66.17 | 45.89 | 32.69 | 27.38 |
| 2058 | 319.54 | 66.18 | 45.9  | 32.7  | 27.37 |
| 2060 | 320.15 | 66.24 | 45.95 | 32.76 | 27.41 |
| 2062 | 320.64 | 66.28 | 46    | 32.79 | 27.42 |
| 2064 | 321.18 | 66.35 | 46.07 | 32.85 | 27.47 |
| 2066 | 321.65 | 66.4  | 46.11 | 32.88 | 27.48 |
| 2068 | 322.11 | 66.44 | 46.15 | 32.9  | 27.49 |
| 2070 | 322.64 | 66.47 | 46.19 | 32.92 | 27.51 |
| 2072 | 323.12 | 66.53 | 46.23 | 32.96 | 27.53 |
| 2074 | 323.64 | 66.57 | 46.27 | 32.99 | 27.54 |
| 2076 | 324.17 | 66.62 | 46.3  | 33    | 27.54 |
| 2078 | 324.76 | 66.65 | 46.35 | 33.03 | 27.56 |
| 2080 | 325.26 | 66.69 | 46.39 | 33.06 | 27.58 |
| 2082 | 325.75 | 66.75 | 46.43 | 33.08 | 27.61 |
| 2084 | 326.23 | 66.79 | 46.47 | 33.11 | 27.64 |
| 2086 | 326.76 | 66.84 | 46.5  | 33.14 | 27.64 |
| 2088 | 327.21 | 66.86 | 46.53 | 33.17 | 27.64 |
| 2090 | 327.7  | 66.9  | 46.58 | 33.2  | 27.66 |
| 2092 | 328.16 | 66.91 | 46.57 | 33.19 | 27.63 |
| 2094 | 328.69 | 66.97 | 46.64 | 33.24 | 27.68 |
| 2096 | 329.28 | 67.03 | 46.69 | 33.28 | 27.7  |
| 2098 | 329.76 | 67.07 | 46.73 | 33.31 | 27.71 |
| 2100 | 330.24 | 67.12 | 46.77 | 33.34 | 27.72 |
| 2102 | 330.79 | 67.17 | 46.82 | 33.38 | 27.76 |

|      |        |       |       |       |       |
|------|--------|-------|-------|-------|-------|
| 2104 | 331.26 | 67.19 | 46.85 | 33.4  | 27.76 |
| 2106 | 331.76 | 67.26 | 46.91 | 33.45 | 27.77 |
| 2108 | 332.32 | 67.29 | 46.95 | 33.49 | 27.78 |
| 2110 | 332.87 | 67.38 | 47.02 | 33.56 | 27.84 |
| 2112 | 333.39 | 67.44 | 47.08 | 33.59 | 27.87 |
| 2114 | 333.86 | 67.46 | 47.1  | 33.61 | 27.87 |
| 2116 | 334.34 | 67.5  | 47.14 | 33.63 | 27.89 |
| 2118 | 334.88 | 67.53 | 47.18 | 33.65 | 27.89 |
| 2120 | 335.33 | 67.57 | 47.2  | 33.66 | 27.89 |
| 2122 | 335.77 | 67.61 | 47.24 | 33.68 | 27.9  |
| 2124 | 336.26 | 67.66 | 47.29 | 33.72 | 27.93 |
| 2126 | 336.86 | 67.71 | 47.33 | 33.72 | 27.95 |
| 2128 | 337.38 | 67.74 | 47.36 | 33.78 | 27.96 |
| 2130 | 337.92 | 67.8  | 47.42 | 33.83 | 27.99 |
| 2132 | 338.42 | 67.85 | 47.47 | 33.86 | 28.01 |
| 2134 | 338.98 | 67.89 | 47.5  | 33.88 | 28.02 |
| 2136 | 339.47 | 67.93 | 47.54 | 33.92 | 28.04 |
| 2138 | 339.95 | 67.96 | 47.58 | 33.95 | 28.06 |
| 2140 | 340.41 | 68    | 47.61 | 33.98 | 28.07 |
| 2142 | 340.91 | 67.99 | 47.61 | 33.97 | 28.02 |
| 2144 | 341.4  | 68.04 | 47.66 | 34.01 | 28.05 |
| 2146 | 341.96 | 68.12 | 47.73 | 34.07 | 28.11 |
| 2148 | 342.5  | 68.16 | 47.78 | 34.11 | 28.13 |
| 2150 | 343.07 | 68.16 | 47.79 | 34.1  | 28.11 |
| 2152 | 343.61 | 68.23 | 47.85 | 34.13 | 28.13 |
| 2154 | 344.11 | 68.29 | 47.91 | 34.19 | 28.18 |
| 2156 | 344.57 | 68.32 | 47.94 | 34.21 | 28.19 |
| 2158 | 345.05 | 68.31 | 47.92 | 34.19 | 28.16 |
| 2160 | 345.53 | 68.37 | 47.99 | 34.23 | 28.19 |
| 2162 | 346.06 | 68.43 | 48.05 | 34.28 | 28.23 |
| 2164 | 346.68 | 68.45 | 48.09 | 34.31 | 28.24 |
| 2166 | 347.14 | 68.48 | 48.12 | 34.33 | 28.25 |
| 2168 | 347.75 | 68.5  | 48.14 | 34.33 | 28.24 |
| 2170 | 348.27 | 68.54 | 48.18 | 34.36 | 28.26 |
| 2172 | 348.75 | 68.55 | 48.19 | 34.37 | 28.25 |
| 2174 | 349.32 | 68.58 | 48.23 | 34.4  | 28.27 |
| 2176 | 349.8  | 68.62 | 48.28 | 34.45 | 28.27 |
| 2178 | 350.29 | 68.65 | 48.33 | 34.48 | 28.29 |
| 2180 | 350.75 | 68.68 | 48.37 | 34.51 | 28.31 |
| 2182 | 351.34 | 68.74 | 48.42 | 34.54 | 28.34 |
| 2184 | 351.89 | 68.77 | 48.47 | 34.58 | 28.36 |
| 2186 | 352.42 | 68.81 | 48.5  | 34.6  | 28.37 |
| 2188 | 352.98 | 68.86 | 48.58 | 34.66 | 28.41 |
| 2190 | 353.58 | 68.89 | 48.58 | 34.65 | 28.42 |

|      |        |       |       |       |       |
|------|--------|-------|-------|-------|-------|
| 2192 | 354.08 | 68.92 | 48.63 | 34.68 | 28.44 |
| 2194 | 354.56 | 68.96 | 48.65 | 34.7  | 28.45 |
| 2196 | 355.04 | 69.01 | 48.71 | 34.74 | 28.49 |
| 2198 | 355.6  | 69.07 | 48.77 | 34.79 | 28.53 |
| 2200 | 356.11 | 69.11 | 48.81 | 34.82 | 28.53 |
| 2202 | 356.64 | 69.14 | 48.86 | 34.84 | 28.55 |
| 2204 | 357.17 | 69.16 | 48.9  | 34.87 | 28.57 |
| 2206 | 357.8  | 69.18 | 48.93 | 34.89 | 28.57 |
| 2208 | 358.34 | 69.22 | 48.97 | 34.94 | 28.59 |
| 2210 | 358.86 | 69.27 | 49.02 | 34.97 | 28.62 |
| 2212 | 359.41 | 69.28 | 49.04 | 34.99 | 28.63 |
| 2214 | 359.82 | 69.32 | 49.08 | 35.02 | 28.65 |
| 2216 | 360.38 | 69.37 | 49.14 | 35.06 | 28.68 |
| 2218 | 360.86 | 69.4  | 49.18 | 35.1  | 28.69 |
| 2220 | 361.37 | 69.43 | 49.22 | 35.12 | 28.71 |
| 2222 | 361.9  | 69.44 | 49.25 | 35.14 | 28.71 |
| 2224 | 362.53 | 69.48 | 49.28 | 35.17 | 28.73 |
| 2226 | 363.09 | 69.52 | 49.34 | 35.21 | 28.76 |
| 2228 | 363.71 | 69.56 | 49.37 | 35.24 | 28.78 |
| 2230 | 364.22 | 69.6  | 49.41 | 35.26 | 28.8  |
| 2232 | 364.68 | 69.6  | 49.43 | 35.28 | 28.78 |
| 2234 | 365.16 | 69.65 | 49.48 | 35.32 | 28.82 |
| 2236 | 365.64 | 69.7  | 49.53 | 35.36 | 28.86 |
| 2238 | 366.22 | 69.73 | 49.57 | 35.38 | 28.87 |
| 2240 | 366.77 | 69.79 | 49.65 | 35.45 | 28.91 |
| 2242 | 367.33 | 69.82 | 49.69 | 35.47 | 28.92 |
| 2244 | 367.9  | 69.87 | 49.75 | 35.52 | 28.97 |
| 2246 | 368.5  | 69.87 | 49.76 | 35.51 | 28.96 |
| 2248 | 369.01 | 69.9  | 49.8  | 35.57 | 28.98 |
| 2250 | 369.51 | 69.92 | 49.83 | 35.58 | 28.97 |
| 2252 | 369.97 | 69.92 | 49.86 | 35.59 | 28.97 |
| 2254 | 370.49 | 69.93 | 49.87 | 35.59 | 28.96 |
| 2256 | 370.96 | 69.96 | 49.94 | 35.65 | 28.98 |
| 2258 | 371.5  | 70.04 | 50    | 35.71 | 29.04 |
| 2260 | 372.03 | 70.05 | 50.02 | 35.73 | 29.06 |
| 2262 | 372.58 | 70.06 | 50.04 | 35.73 | 29.05 |
| 2264 | 373.24 | 70.1  | 50.08 | 35.78 | 29.09 |
| 2266 | 373.77 | 70.13 | 50.13 | 35.8  | 29.1  |
| 2268 | 374.3  | 70.18 | 50.18 | 35.84 | 29.13 |
| 2270 | 374.85 | 70.2  | 50.2  | 35.84 | 29.14 |
| 2272 | 375.33 | 70.21 | 50.23 | 35.88 | 29.17 |
| 2274 | 375.81 | 70.27 | 50.3  | 35.93 | 29.22 |
| 2276 | 376.27 | 70.28 | 50.33 | 35.96 | 29.23 |
| 2278 | 376.84 | 70.31 | 50.36 | 35.97 | 29.22 |

|      |        |       |       |       |       |
|------|--------|-------|-------|-------|-------|
| 2280 | 377.37 | 70.31 | 50.38 | 36.01 | 29.25 |
| 2282 | 377.92 | 70.34 | 50.43 | 36.05 | 29.27 |
| 2284 | 378.44 | 70.35 | 50.46 | 36.06 | 29.26 |
| 2286 | 378.96 | 70.36 | 50.48 | 36.08 | 29.28 |
| 2288 | 379.56 | 70.44 | 50.57 | 36.15 | 29.33 |
| 2290 | 380.05 | 70.46 | 50.62 | 36.19 | 29.36 |
| 2292 | 380.5  | 70.47 | 50.65 | 36.22 | 29.38 |
| 2294 | 380.92 | 70.47 | 50.65 | 36.2  | 29.35 |
| 2296 | 381.49 | 70.53 | 50.71 | 36.25 | 29.4  |
| 2298 | 382    | 70.55 | 50.75 | 36.28 | 29.43 |
| 2300 | 382.54 | 70.57 | 50.78 | 36.3  | 29.44 |
| 2302 | 383.16 | 70.59 | 50.81 | 36.33 | 29.46 |
| 2304 | 383.68 | 70.62 | 50.85 | 36.35 | 29.47 |
| 2306 | 384.16 | 70.62 | 50.88 | 36.39 | 29.48 |
| 2308 | 384.63 | 70.65 | 50.9  | 36.39 | 29.48 |
| 2310 | 385.16 | 70.67 | 50.94 | 36.44 | 29.51 |
| 2312 | 385.55 | 70.65 | 50.94 | 36.43 | 29.48 |
| 2314 | 386.01 | 70.66 | 50.97 | 36.46 | 29.49 |
| 2316 | 386.47 | 70.68 | 50.99 | 36.48 | 29.49 |
| 2318 | 387.03 | 70.69 | 51.02 | 36.5  | 29.5  |
| 2320 | 387.56 | 70.69 | 51.03 | 36.5  | 29.48 |
| 2322 | 388.07 | 70.7  | 51.07 | 36.52 | 29.5  |
| 2324 | 388.56 | 70.72 | 51.09 | 36.54 | 29.5  |
| 2326 | 389.06 | 70.76 | 51.15 | 36.59 | 29.53 |
| 2328 | 389.61 | 70.83 | 51.21 | 36.64 | 29.59 |
| 2330 | 390.03 | 70.85 | 51.24 | 36.66 | 29.61 |
| 2332 | 390.45 | 70.87 | 51.26 | 36.69 | 29.64 |
| 2334 | 390.89 | 70.89 | 51.3  | 36.73 | 29.66 |
| 2336 | 391.48 | 70.92 | 51.35 | 36.76 | 29.67 |
| 2338 | 391.99 | 70.94 | 51.38 | 36.79 | 29.69 |
| 2340 | 392.5  | 70.96 | 51.42 | 36.82 | 29.73 |
| 2342 | 393.06 | 70.95 | 51.43 | 36.82 | 29.71 |
| 2344 | 393.55 | 71    | 51.47 | 36.87 | 29.73 |
| 2346 | 394.03 | 71.02 | 51.52 | 36.91 | 29.75 |
| 2348 | 394.48 | 71.05 | 51.55 | 36.95 | 29.77 |
| 2350 | 394.96 | 71.06 | 51.59 | 36.97 | 29.78 |
| 2352 | 395.38 | 71.1  | 51.63 | 37.01 | 29.82 |
| 2354 | 395.79 | 71.09 | 51.63 | 37    | 29.79 |
| 2356 | 396.2  | 71.07 | 51.61 | 36.98 | 29.75 |
| 2358 | 396.81 | 71.11 | 51.67 | 37.03 | 29.8  |
| 2360 | 397.32 | 71.16 | 51.71 | 37.06 | 29.83 |
| 2362 | 397.79 | 71.18 | 51.74 | 37.07 | 29.84 |
| 2364 | 398.26 | 71.25 | 51.8  | 37.14 | 29.9  |
| 2366 | 398.77 | 71.27 | 51.83 | 37.17 | 29.91 |

|      |        |       |       |       |       |
|------|--------|-------|-------|-------|-------|
| 2368 | 399.16 | 71.3  | 51.86 | 37.19 | 29.92 |
| 2370 | 399.54 | 71.31 | 51.89 | 37.23 | 29.94 |
| 2372 | 399.96 | 71.34 | 51.91 | 37.24 | 29.95 |
| 2374 | 400.51 | 71.37 | 51.95 | 37.28 | 29.99 |
| 2376 | 401.02 | 71.4  | 52    | 37.32 | 30    |
| 2378 | 401.46 | 71.38 | 51.99 | 37.33 | 29.99 |
| 2380 | 401.94 | 71.43 | 52.05 | 37.38 | 30.03 |
| 2382 | 402.36 | 71.43 | 52.04 | 37.37 | 30    |
| 2384 | 402.87 | 71.47 | 52.09 | 37.39 | 30.02 |
| 2386 | 403.3  | 71.5  | 52.14 | 37.43 | 30.06 |
| 2388 | 403.67 | 71.51 | 52.16 | 37.45 | 30.06 |
| 2390 | 404.13 | 71.53 | 52.18 | 37.47 | 30.07 |
| 2392 | 404.58 | 71.58 | 52.23 | 37.5  | 30.1  |
| 2394 | 405.03 | 71.6  | 52.24 | 37.51 | 30.1  |
| 2396 | 405.48 | 71.62 | 52.27 | 37.53 | 30.12 |
| 2398 | 406    | 71.65 | 52.3  | 37.55 | 30.14 |
| 2400 | 406.42 | 71.69 | 52.34 | 37.58 | 30.16 |
| 2402 | 406.82 | 71.71 | 52.37 | 37.62 | 30.17 |
| 2404 | 407.22 | 71.78 | 52.43 | 37.68 | 30.23 |
| 2406 | 407.65 | 71.78 | 52.44 | 37.68 | 30.22 |
| 2408 | 408.07 | 71.81 | 52.49 | 37.71 | 30.23 |
| 2410 | 408.55 | 71.89 | 52.56 | 37.79 | 30.3  |
| 2412 | 409    | 71.91 | 52.58 | 37.81 | 30.29 |
| 2414 | 409.51 | 71.92 | 52.59 | 37.81 | 30.29 |
| 2416 | 410    | 71.97 | 52.67 | 37.88 | 30.35 |
| 2418 | 410.41 | 72    | 52.68 | 37.9  | 30.34 |
| 2420 | 410.79 | 72    | 52.7  | 37.91 | 30.35 |
| 2422 | 411.27 | 72.07 | 52.76 | 37.97 | 30.4  |
| 2424 | 411.64 | 72.09 | 52.8  | 38    | 30.41 |
| 2426 | 412.04 | 72.12 | 52.84 | 38.04 | 30.45 |
| 2428 | 412.46 | 72.15 | 52.86 | 38.05 | 30.44 |
| 2430 | 413.01 | 72.19 | 52.91 | 38.1  | 30.47 |
| 2432 | 413.47 | 72.22 | 52.95 | 38.14 | 30.5  |
| 2434 | 413.92 | 72.25 | 52.98 | 38.17 | 30.52 |
| 2436 | 414.35 | 72.28 | 53    | 38.19 | 30.53 |
| 2438 | 414.84 | 72.32 | 53.06 | 38.25 | 30.59 |
| 2440 | 415.19 | 72.33 | 53.09 | 38.25 | 30.58 |
| 2442 | 415.56 | 72.37 | 53.12 | 38.27 | 30.61 |
| 2444 | 415.95 | 72.44 | 53.17 | 38.32 | 30.66 |
| 2446 | 416.45 | 72.45 | 53.2  | 38.34 | 30.67 |
| 2448 | 416.89 | 72.48 | 53.23 | 38.36 | 30.67 |
| 2450 | 417.34 | 72.51 | 53.26 | 38.39 | 30.7  |
| 2452 | 417.77 | 72.54 | 53.3  | 38.42 | 30.71 |
| 2454 | 418.26 | 72.59 | 53.35 | 38.46 | 30.76 |

|      |        |       |       |       |       |
|------|--------|-------|-------|-------|-------|
| 2456 | 418.6  | 72.6  | 53.36 | 38.45 | 30.74 |
| 2458 | 419.01 | 72.66 | 53.43 | 38.53 | 30.81 |
| 2460 | 419.39 | 72.68 | 53.47 | 38.57 | 30.83 |
| 2462 | 419.86 | 72.7  | 53.5  | 38.6  | 30.84 |
| 2464 | 420.26 | 72.7  | 53.49 | 38.61 | 30.83 |
| 2466 | 420.72 | 72.73 | 53.52 | 38.63 | 30.85 |
| 2468 | 421.19 | 72.79 | 53.58 | 38.68 | 30.89 |
| 2470 | 421.7  | 72.84 | 53.62 | 38.73 | 30.93 |
| 2472 | 422.06 | 72.84 | 53.64 | 38.72 | 30.92 |
| 2474 | 422.42 | 72.89 | 53.66 | 38.74 | 30.94 |
| 2476 | 422.79 | 72.93 | 53.7  | 38.78 | 30.96 |
| 2478 | 423.21 | 72.94 | 53.72 | 38.79 | 30.97 |
| 2480 | 423.65 | 72.99 | 53.77 | 38.82 | 31    |
| 2482 | 424.1  | 73.02 | 53.8  | 38.84 | 31.02 |
| 2484 | 424.56 | 73.05 | 53.83 | 38.87 | 31.04 |
| 2486 | 425.02 | 73.09 | 53.87 | 38.92 | 31.05 |
| 2488 | 425.55 | 73.16 | 53.94 | 38.98 | 31.09 |
| 2490 | 425.95 | 73.2  | 53.98 | 39.02 | 31.12 |
| 2492 | 426.32 | 73.21 | 54    | 39.03 | 31.13 |
| 2494 | 426.66 | 73.22 | 54    | 39.03 | 31.12 |
| 2496 | 427.1  | 73.27 | 54.02 | 39.06 | 31.11 |
| 2498 | 427.55 | 73.31 | 54.07 | 39.1  | 31.16 |
| 2500 | 428.01 | 73.34 | 54.09 | 39.12 | 31.2  |
| 2502 | 428.56 | 73.39 | 54.12 | 39.14 | 31.21 |
| 2504 | 429.01 | 73.45 | 54.17 | 39.16 | 31.21 |
| 2506 | 429.44 | 73.48 | 54.19 | 39.19 | 31.24 |
| 2508 | 429.83 | 73.54 | 54.24 | 39.24 | 31.27 |
| 2510 | 430.25 | 73.57 | 54.23 | 39.23 | 31.26 |
| 2512 | 430.66 | 73.64 | 54.31 | 39.29 | 31.31 |
| 2514 | 431.04 | 73.7  | 54.36 | 39.33 | 31.35 |
| 2516 | 431.4  | 73.76 | 54.39 | 39.37 | 31.36 |
| 2518 | 431.8  | 73.82 | 54.43 | 39.4  | 31.39 |
| 2520 | 432.14 | 73.87 | 54.47 | 39.44 | 31.4  |
| 2522 | 432.47 | 73.93 | 54.5  | 39.47 | 31.42 |
| 2524 | 432.74 | 73.95 | 54.49 | 39.46 | 31.41 |
| 2526 | 433.11 | 74.04 | 54.55 | 39.52 | 31.45 |
| 2528 | 433.38 | 74.12 | 54.57 | 39.53 | 31.45 |
| 2530 | 433.64 | 74.21 | 54.62 | 39.57 | 31.48 |
| 2532 | 433.88 | 74.27 | 54.64 | 39.59 | 31.49 |
| 2534 | 434.17 | 74.37 | 54.68 | 39.61 | 31.51 |
| 2536 | 434.4  | 74.47 | 54.73 | 39.65 | 31.53 |
| 2538 | 434.61 | 74.56 | 54.76 | 39.67 | 31.53 |
| 2540 | 434.81 | 74.67 | 54.79 | 39.69 | 31.53 |
| 2542 | 435.03 | 74.77 | 54.79 | 39.68 | 31.53 |



|      |        |       |       |       |       |
|------|--------|-------|-------|-------|-------|
| 2544 | 435.22 | 74.92 | 54.86 | 39.71 | 31.56 |
| 2546 | 435.43 | 75.08 | 54.92 | 39.76 | 31.6  |
| 2548 | 435.58 | 75.19 | 54.92 | 39.77 | 31.61 |
| 2550 | 435.78 | 75.36 | 54.98 | 39.8  | 31.62 |
| 2552 | 435.93 | 75.53 | 55.03 | 39.82 | 31.62 |
| 2554 | 436.08 | 75.7  | 55.07 | 39.84 | 31.63 |
| 2556 | 436.2  | 75.83 | 55.08 | 39.83 | 31.62 |
| 2558 | 436.41 | 76.08 | 55.18 | 39.91 | 31.68 |
| 2560 | 436.54 | 76.24 | 55.22 | 39.94 | 31.69 |
| 2562 | 436.63 | 76.36 | 55.24 | 39.93 | 31.67 |
| 2564 | 436.78 | 76.55 | 55.32 | 39.99 | 31.71 |
| 2566 | 436.92 | 76.72 | 55.39 | 40.03 | 31.73 |
| 2568 | 437.09 | 76.92 | 55.47 | 40.08 | 31.77 |
| 2570 | 437.21 | 77.07 | 55.54 | 40.11 | 31.79 |
| 2572 | 437.33 | 77.21 | 55.6  | 40.13 | 31.81 |
| 2574 | 437.47 | 77.36 | 55.66 | 40.15 | 31.82 |
| 2576 | 437.57 | 77.49 | 55.7  | 40.16 | 31.82 |
| 2578 | 437.7  | 77.63 | 55.79 | 40.21 | 31.84 |
| 2580 | 437.82 | 77.76 | 55.85 | 40.24 | 31.87 |
| 2582 | 437.97 | 77.88 | 55.92 | 40.27 | 31.88 |
| 2584 | 438.09 | 77.99 | 55.98 | 40.27 | 31.88 |
| 2586 | 438.21 | 78.11 | 56.05 | 40.31 | 31.9  |
| 2588 | 438.34 | 78.22 | 56.12 | 40.34 | 31.92 |
| 2590 | 438.48 | 78.33 | 56.17 | 40.36 | 31.93 |
| 2592 | 438.63 | 78.45 | 56.28 | 40.4  | 31.95 |
| 2594 | 438.78 | 78.54 | 56.35 | 40.43 | 31.97 |
| 2596 | 438.92 | 78.64 | 56.42 | 40.46 | 31.98 |
| 2598 | 439.08 | 78.73 | 56.49 | 40.49 | 32    |
| 2600 | 439.24 | 78.84 | 56.57 | 40.52 | 32.01 |
| 2602 | 439.39 | 78.93 | 56.63 | 40.53 | 32.01 |
| 2604 | 439.53 | 79.01 | 56.7  | 40.56 | 32.03 |
| 2606 | 439.7  | 79.1  | 56.78 | 40.59 | 32.05 |
| 2608 | 439.85 | 79.18 | 56.85 | 40.6  | 32.06 |
| 2610 | 440.01 | 79.27 | 56.94 | 40.65 | 32.06 |
| 2612 | 440.12 | 79.3  | 56.97 | 40.64 | 32.06 |
| 2614 | 440.3  | 79.43 | 57.06 | 40.69 | 32.08 |
| 2616 | 440.45 | 79.5  | 57.14 | 40.72 | 32.12 |
| 2618 | 440.58 | 79.59 | 57.22 | 40.76 | 32.14 |
| 2620 | 440.65 | 79.61 | 57.23 | 40.73 | 32.09 |
| 2622 | 440.8  | 79.7  | 57.33 | 40.79 | 32.13 |
| 2624 | 440.92 | 79.8  | 57.41 | 40.82 | 32.16 |
| 2626 | 441.04 | 79.89 | 57.5  | 40.87 | 32.18 |
| 2628 | 441.1  | 79.96 | 57.56 | 40.89 | 32.18 |
| 2630 | 441.19 | 80.04 | 57.62 | 40.91 | 32.19 |

|      |        |       |       |       |       |
|------|--------|-------|-------|-------|-------|
| 2632 | 441.25 | 80.11 | 57.7  | 40.93 | 32.2  |
| 2634 | 441.3  | 80.2  | 57.78 | 40.98 | 32.24 |
| 2636 | 441.36 | 80.29 | 57.86 | 41.02 | 32.27 |
| 2638 | 441.4  | 80.39 | 57.95 | 41.07 | 32.29 |
| 2640 | 441.41 | 80.46 | 58.01 | 41.08 | 32.28 |
| 2642 | 441.42 | 80.55 | 58.09 | 41.12 | 32.32 |
| 2644 | 441.41 | 80.64 | 58.17 | 41.17 | 32.35 |
| 2646 | 441.35 | 80.69 | 58.2  | 41.17 | 32.32 |
| 2648 | 441.32 | 80.79 | 58.25 | 41.18 | 32.32 |
| 2650 | 441.27 | 80.87 | 58.33 | 41.23 | 32.34 |
| 2652 | 441.19 | 80.94 | 58.38 | 41.24 | 32.34 |
| 2654 | 441.13 | 81.05 | 58.45 | 41.27 | 32.36 |
| 2656 | 441.05 | 81.15 | 58.52 | 41.3  | 32.36 |
| 2658 | 440.95 | 81.25 | 58.59 | 41.34 | 32.38 |
| 2660 | 440.84 | 81.36 | 58.65 | 41.37 | 32.39 |
| 2662 | 440.71 | 81.47 | 58.71 | 41.4  | 32.4  |
| 2664 | 440.58 | 81.6  | 58.77 | 41.41 | 32.39 |
| 2666 | 440.44 | 81.74 | 58.82 | 41.44 | 32.39 |
| 2668 | 440.32 | 81.9  | 58.91 | 41.51 | 32.44 |
| 2670 | 440.16 | 82.08 | 58.98 | 41.55 | 32.46 |
| 2672 | 440.01 | 82.33 | 59.09 | 41.61 | 32.5  |
| 2674 | 439.82 | 82.52 | 59.13 | 41.63 | 32.51 |
| 2676 | 439.62 | 82.72 | 59.18 | 41.64 | 32.52 |
| 2678 | 439.39 | 82.93 | 59.23 | 41.66 | 32.53 |
| 2680 | 439.18 | 83.19 | 59.31 | 41.69 | 32.54 |
| 2682 | 438.95 | 83.41 | 59.35 | 41.72 | 32.55 |
| 2684 | 438.75 | 83.66 | 59.42 | 41.75 | 32.56 |
| 2686 | 438.55 | 83.93 | 59.49 | 41.79 | 32.59 |
| 2688 | 438.25 | 84.2  | 59.51 | 41.78 | 32.56 |
| 2690 | 438.02 | 84.46 | 59.56 | 41.83 | 32.56 |
| 2692 | 437.77 | 84.72 | 59.61 | 41.86 | 32.57 |
| 2694 | 437.48 | 84.99 | 59.66 | 41.89 | 32.58 |
| 2696 | 437.25 | 85.32 | 59.73 | 41.92 | 32.59 |
| 2698 | 437    | 85.6  | 59.77 | 41.95 | 32.61 |
| 2700 | 436.76 | 85.9  | 59.84 | 41.97 | 32.62 |
| 2702 | 436.44 | 86.22 | 59.87 | 41.99 | 32.62 |
| 2704 | 436.22 | 86.54 | 59.95 | 42.03 | 32.64 |
| 2706 | 435.94 | 86.82 | 59.98 | 42.07 | 32.65 |
| 2708 | 435.66 | 87.1  | 60.02 | 42.08 | 32.65 |
| 2710 | 435.41 | 87.42 | 60.08 | 42.12 | 32.68 |
| 2712 | 435.09 | 87.77 | 60.12 | 42.16 | 32.68 |
| 2714 | 434.81 | 88.05 | 60.18 | 42.19 | 32.69 |
| 2716 | 434.56 | 88.39 | 60.25 | 42.27 | 32.74 |
| 2718 | 434.23 | 88.68 | 60.28 | 42.29 | 32.73 |

|      |        |        |       |       |       |
|------|--------|--------|-------|-------|-------|
| 2720 | 433.98 | 89.09  | 60.36 | 42.36 | 32.78 |
| 2722 | 433.64 | 89.34  | 60.36 | 42.35 | 32.75 |
| 2724 | 433.37 | 89.68  | 60.43 | 42.42 | 32.8  |
| 2726 | 433.05 | 90.05  | 60.48 | 42.45 | 32.81 |
| 2728 | 432.7  | 90.34  | 60.51 | 42.46 | 32.79 |
| 2730 | 432.4  | 90.66  | 60.55 | 42.5  | 32.84 |
| 2732 | 432.09 | 90.98  | 60.6  | 42.54 | 32.84 |
| 2734 | 431.75 | 91.26  | 60.61 | 42.55 | 32.84 |
| 2736 | 431.36 | 91.63  | 60.66 | 42.58 | 32.85 |
| 2738 | 431.06 | 91.97  | 60.72 | 42.63 | 32.88 |
| 2740 | 430.72 | 92.3   | 60.76 | 42.65 | 32.89 |
| 2742 | 430.28 | 92.6   | 60.79 | 42.66 | 32.88 |
| 2744 | 429.95 | 93     | 60.84 | 42.7  | 32.91 |
| 2746 | 429.6  | 93.32  | 60.88 | 42.75 | 32.93 |
| 2748 | 429.26 | 93.66  | 60.94 | 42.79 | 32.94 |
| 2750 | 428.9  | 93.99  | 60.98 | 42.83 | 32.96 |
| 2752 | 428.46 | 94.38  | 61    | 42.84 | 32.95 |
| 2754 | 428.09 | 94.74  | 61.07 | 42.89 | 32.97 |
| 2756 | 427.71 | 95.09  | 61.12 | 42.93 | 32.98 |
| 2758 | 427.25 | 95.42  | 61.16 | 42.95 | 33    |
| 2760 | 426.85 | 95.81  | 61.21 | 42.97 | 32.99 |
| 2762 | 426.49 | 96.18  | 61.26 | 43.03 | 33.02 |
| 2764 | 426.1  | 96.52  | 61.28 | 43.05 | 33.01 |
| 2766 | 425.63 | 96.95  | 61.34 | 43.09 | 33.02 |
| 2768 | 425.23 | 97.32  | 61.42 | 43.15 | 33.06 |
| 2770 | 424.81 | 97.68  | 61.44 | 43.16 | 33.05 |
| 2772 | 424.39 | 98.01  | 61.45 | 43.16 | 33.03 |
| 2774 | 423.97 | 98.37  | 61.49 | 43.18 | 33.03 |
| 2776 | 423.5  | 98.8   | 61.56 | 43.21 | 33.04 |
| 2778 | 423.1  | 99.19  | 61.6  | 43.24 | 33.06 |
| 2780 | 422.69 | 99.55  | 61.64 | 43.27 | 33.07 |
| 2782 | 422.2  | 99.94  | 61.69 | 43.29 | 33.08 |
| 2784 | 421.78 | 100.38 | 61.75 | 43.34 | 33.1  |
| 2786 | 421.37 | 100.74 | 61.78 | 43.37 | 33.11 |
| 2788 | 420.95 | 101.11 | 61.82 | 43.39 | 33.1  |
| 2790 | 420.45 | 101.56 | 61.86 | 43.42 | 33.11 |
| 2792 | 420.05 | 101.97 | 61.93 | 43.47 | 33.14 |
| 2794 | 419.66 | 102.39 | 62.02 | 43.55 | 33.19 |
| 2796 | 419.21 | 102.74 | 62.02 | 43.55 | 33.15 |
| 2798 | 418.81 | 103.15 | 62.08 | 43.6  | 33.16 |
| 2800 | 418.31 | 103.59 | 62.14 | 43.64 | 33.18 |
| 2802 | 417.92 | 104.01 | 62.2  | 43.7  | 33.21 |
| 2804 | 417.5  | 104.4  | 62.25 | 43.74 | 33.23 |
| 2806 | 417.01 | 104.88 | 62.3  | 43.78 | 33.25 |

|      |        |        |       |       |       |
|------|--------|--------|-------|-------|-------|
| 2808 | 416.58 | 105.28 | 62.35 | 43.8  | 33.25 |
| 2810 | 416.14 | 105.67 | 62.39 | 43.84 | 33.26 |
| 2812 | 415.72 | 106.07 | 62.43 | 43.87 | 33.25 |
| 2814 | 415.3  | 106.46 | 62.46 | 43.91 | 33.27 |
| 2816 | 414.77 | 106.88 | 62.48 | 43.9  | 33.23 |
| 2818 | 414.39 | 107.33 | 62.58 | 43.98 | 33.29 |
| 2820 | 413.95 | 107.73 | 62.6  | 44    | 33.3  |
| 2822 | 413.46 | 108.19 | 62.66 | 44.04 | 33.32 |
| 2824 | 413.02 | 108.59 | 62.7  | 44.04 | 33.31 |
| 2826 | 412.59 | 108.98 | 62.74 | 44.08 | 33.33 |
| 2828 | 412.18 | 109.4  | 62.78 | 44.12 | 33.35 |
| 2830 | 411.74 | 109.8  | 62.82 | 44.13 | 33.33 |
| 2832 | 411.25 | 110.29 | 62.88 | 44.19 | 33.36 |
| 2834 | 410.84 | 110.7  | 62.93 | 44.23 | 33.39 |
| 2836 | 410.4  | 111.1  | 62.97 | 44.25 | 33.38 |
| 2838 | 409.9  | 111.52 | 63.03 | 44.3  | 33.41 |
| 2840 | 409.45 | 111.97 | 63.04 | 44.31 | 33.39 |
| 2842 | 409.01 | 112.37 | 63.09 | 44.36 | 33.38 |
| 2844 | 408.63 | 112.79 | 63.17 | 44.41 | 33.42 |
| 2846 | 408.21 | 113.21 | 63.22 | 44.45 | 33.45 |
| 2848 | 407.72 | 113.68 | 63.27 | 44.5  | 33.46 |
| 2850 | 407.27 | 114.09 | 63.3  | 44.52 | 33.45 |
| 2852 | 406.86 | 114.51 | 63.35 | 44.56 | 33.48 |
| 2854 | 406.41 | 114.9  | 63.38 | 44.58 | 33.5  |
| 2856 | 405.93 | 115.4  | 63.43 | 44.63 | 33.51 |
| 2858 | 405.48 | 115.78 | 63.46 | 44.65 | 33.52 |
| 2860 | 405.07 | 116.21 | 63.51 | 44.69 | 33.53 |
| 2862 | 404.58 | 116.62 | 63.55 | 44.72 | 33.54 |
| 2864 | 404.13 | 117.1  | 63.59 | 44.75 | 33.54 |
| 2866 | 403.69 | 117.49 | 63.62 | 44.78 | 33.55 |
| 2868 | 403.28 | 117.92 | 63.68 | 44.83 | 33.56 |
| 2870 | 402.78 | 118.34 | 63.72 | 44.88 | 33.58 |
| 2872 | 402.32 | 118.79 | 63.75 | 44.9  | 33.57 |
| 2874 | 401.88 | 119.18 | 63.76 | 44.91 | 33.55 |
| 2876 | 401.45 | 119.59 | 63.8  | 44.95 | 33.57 |
| 2878 | 400.98 | 120.08 | 63.87 | 45.02 | 33.58 |
| 2880 | 400.52 | 120.47 | 63.88 | 45.03 | 33.56 |
| 2882 | 400.09 | 120.89 | 63.94 | 45.08 | 33.59 |
| 2884 | 399.65 | 121.29 | 63.96 | 45.09 | 33.58 |
| 2886 | 399.18 | 121.81 | 64.04 | 45.18 | 33.62 |
| 2888 | 398.76 | 122.23 | 64.09 | 45.22 | 33.64 |
| 2890 | 398.33 | 122.63 | 64.13 | 45.27 | 33.66 |
| 2892 | 397.9  | 123.04 | 64.17 | 45.3  | 33.65 |
| 2894 | 397.41 | 123.46 | 64.22 | 45.35 | 33.68 |

|      |        |        |       |       |       |
|------|--------|--------|-------|-------|-------|
| 2896 | 396.99 | 123.95 | 64.26 | 45.38 | 33.69 |
| 2898 | 396.55 | 124.35 | 64.29 | 45.41 | 33.68 |
| 2900 | 396.12 | 124.78 | 64.33 | 45.46 | 33.71 |
| 2902 | 395.65 | 125.17 | 64.34 | 45.45 | 33.67 |
| 2904 | 395.14 | 125.65 | 64.4  | 45.52 | 33.71 |
| 2906 | 394.68 | 126.02 | 64.41 | 45.52 | 33.69 |
| 2908 | 394.25 | 126.43 | 64.44 | 45.56 | 33.69 |
| 2910 | 393.77 | 126.86 | 64.49 | 45.62 | 33.72 |
| 2912 | 393.33 | 127.35 | 64.54 | 45.67 | 33.73 |
| 2914 | 392.88 | 127.74 | 64.55 | 45.69 | 33.74 |
| 2916 | 392.45 | 128.13 | 64.6  | 45.72 | 33.74 |
| 2918 | 391.93 | 128.53 | 64.61 | 45.74 | 33.73 |
| 2920 | 391.49 | 129.01 | 64.67 | 45.8  | 33.76 |
| 2922 | 391.07 | 129.43 | 64.7  | 45.84 | 33.78 |
| 2924 | 390.61 | 129.84 | 64.74 | 45.88 | 33.78 |
| 2926 | 390.16 | 130.25 | 64.77 | 45.91 | 33.79 |
| 2928 | 389.61 | 130.7  | 64.79 | 45.93 | 33.76 |
| 2930 | 389.22 | 131.14 | 64.85 | 46.01 | 33.82 |
| 2932 | 388.8  | 131.57 | 64.93 | 46.08 | 33.86 |
| 2934 | 388.22 | 131.93 | 64.91 | 46.07 | 33.81 |
| 2936 | 387.8  | 132.43 | 64.99 | 46.12 | 33.84 |
| 2938 | 387.32 | 132.81 | 64.99 | 46.15 | 33.84 |
| 2940 | 386.89 | 133.22 | 65.03 | 46.2  | 33.85 |
| 2942 | 386.38 | 133.69 | 65.08 | 46.24 | 33.85 |
| 2944 | 385.96 | 134.12 | 65.15 | 46.33 | 33.9  |
| 2946 | 385.51 | 134.53 | 65.19 | 46.38 | 33.91 |
| 2948 | 385.08 | 134.95 | 65.25 | 46.44 | 33.94 |
| 2950 | 384.62 | 135.36 | 65.28 | 46.47 | 33.95 |
| 2952 | 384.07 | 135.82 | 65.32 | 46.51 | 33.95 |
| 2954 | 383.62 | 136.24 | 65.37 | 46.56 | 33.97 |
| 2956 | 383.16 | 136.63 | 65.4  | 46.6  | 33.98 |
| 2958 | 382.6  | 137.03 | 65.43 | 46.63 | 33.98 |
| 2960 | 382.15 | 137.5  | 65.48 | 46.66 | 33.99 |
| 2962 | 381.66 | 137.91 | 65.53 | 46.71 | 34    |
| 2964 | 381.21 | 138.32 | 65.56 | 46.75 | 34.02 |
| 2966 | 380.7  | 138.67 | 65.55 | 46.75 | 34    |
| 2968 | 380.18 | 139.17 | 65.64 | 46.83 | 34.04 |
| 2970 | 379.7  | 139.56 | 65.66 | 46.86 | 34.03 |
| 2972 | 379.25 | 139.97 | 65.71 | 46.91 | 34.06 |
| 2974 | 378.71 | 140.38 | 65.76 | 46.96 | 34.08 |
| 2976 | 378.23 | 140.84 | 65.79 | 47    | 34.09 |
| 2978 | 377.75 | 141.26 | 65.84 | 47.05 | 34.1  |
| 2980 | 377.27 | 141.65 | 65.86 | 47.08 | 34.1  |
| 2982 | 376.71 | 142.12 | 65.92 | 47.13 | 34.11 |

|      |        |        |       |       |       |
|------|--------|--------|-------|-------|-------|
| 2984 | 376.22 | 142.5  | 65.96 | 47.16 | 34.12 |
| 2986 | 375.76 | 142.92 | 66    | 47.23 | 34.15 |
| 2988 | 375.28 | 143.32 | 66.04 | 47.27 | 34.16 |
| 2990 | 374.72 | 143.72 | 66.07 | 47.3  | 34.15 |
| 2992 | 374.25 | 144.19 | 66.12 | 47.34 | 34.17 |
| 2994 | 373.76 | 144.58 | 66.16 | 47.39 | 34.17 |
| 2996 | 373.27 | 144.94 | 66.17 | 47.4  | 34.17 |
| 2998 | 372.8  | 145.36 | 66.23 | 47.47 | 34.2  |
| 3000 | 372.26 | 145.84 | 66.28 | 47.52 | 34.23 |
| 3002 | 371.78 | 146.23 | 66.32 | 47.56 | 34.22 |
| 3004 | 371.31 | 146.64 | 66.36 | 47.6  | 34.23 |
| 3006 | 370.73 | 147.02 | 66.38 | 47.63 | 34.22 |
| 3008 | 370.29 | 147.51 | 66.46 | 47.7  | 34.27 |
| 3010 | 369.77 | 147.86 | 66.45 | 47.71 | 34.23 |
| 3012 | 369.32 | 148.26 | 66.5  | 47.76 | 34.25 |
| 3014 | 368.78 | 148.75 | 66.55 | 47.83 | 34.29 |
| 3016 | 368.29 | 149.14 | 66.6  | 47.87 | 34.28 |
| 3018 | 367.85 | 149.56 | 66.65 | 47.92 | 34.29 |
| 3020 | 367.35 | 149.92 | 66.65 | 47.93 | 34.28 |
| 3022 | 366.83 | 150.41 | 66.7  | 48    | 34.31 |
| 3024 | 366.34 | 150.79 | 66.73 | 48.03 | 34.32 |
| 3026 | 365.9  | 151.21 | 66.8  | 48.1  | 34.36 |
| 3028 | 365.42 | 151.61 | 66.82 | 48.12 | 34.34 |
| 3030 | 364.91 | 152.04 | 66.86 | 48.18 | 34.35 |
| 3032 | 364.46 | 152.53 | 66.92 | 48.23 | 34.37 |
| 3034 | 363.99 | 152.93 | 66.94 | 48.27 | 34.39 |
| 3036 | 363.53 | 153.34 | 66.98 | 48.31 | 34.38 |
| 3038 | 363.03 | 153.85 | 67.04 | 48.38 | 34.43 |
| 3040 | 362.56 | 154.26 | 67.08 | 48.44 | 34.44 |
| 3042 | 362.15 | 154.72 | 67.15 | 48.5  | 34.47 |
| 3044 | 361.66 | 155.1  | 67.14 | 48.5  | 34.43 |
| 3046 | 361.22 | 155.52 | 67.18 | 48.55 | 34.44 |
| 3048 | 360.72 | 156.03 | 67.26 | 48.63 | 34.49 |
| 3050 | 360.27 | 156.46 | 67.29 | 48.69 | 34.5  |
| 3052 | 359.84 | 156.9  | 67.33 | 48.73 | 34.51 |
| 3054 | 359.34 | 157.43 | 67.39 | 48.79 | 34.52 |
| 3056 | 358.89 | 157.84 | 67.41 | 48.81 | 34.52 |
| 3058 | 358.44 | 158.28 | 67.44 | 48.85 | 34.51 |
| 3060 | 358.06 | 158.78 | 67.53 | 48.95 | 34.57 |
| 3062 | 357.51 | 159.19 | 67.53 | 48.96 | 34.55 |
| 3064 | 357.09 | 159.7  | 67.55 | 48.99 | 34.56 |
| 3066 | 356.69 | 160.2  | 67.63 | 49.07 | 34.58 |
| 3068 | 356.26 | 160.64 | 67.66 | 49.1  | 34.6  |
| 3070 | 355.76 | 161.18 | 67.69 | 49.14 | 34.6  |

|      |        |        |       |       |       |
|------|--------|--------|-------|-------|-------|
| 3072 | 355.34 | 161.57 | 67.73 | 49.19 | 34.62 |
| 3074 | 354.97 | 162.17 | 67.82 | 49.29 | 34.67 |
| 3076 | 354.54 | 162.62 | 67.84 | 49.32 | 34.67 |
| 3078 | 354.14 | 163.11 | 67.9  | 49.39 | 34.7  |
| 3080 | 353.65 | 163.63 | 67.91 | 49.41 | 34.67 |
| 3082 | 353.25 | 164.11 | 67.96 | 49.47 | 34.7  |
| 3084 | 352.89 | 164.63 | 68.03 | 49.54 | 34.73 |
| 3086 | 352.44 | 165.14 | 68.08 | 49.59 | 34.75 |
| 3088 | 352.04 | 165.73 | 68.14 | 49.65 | 34.78 |
| 3090 | 351.65 | 166.22 | 68.17 | 49.71 | 34.8  |
| 3092 | 351.25 | 166.72 | 68.22 | 49.76 | 34.81 |
| 3094 | 350.81 | 167.31 | 68.25 | 49.8  | 34.81 |
| 3096 | 350.41 | 167.81 | 68.3  | 49.86 | 34.83 |
| 3098 | 350.01 | 168.31 | 68.32 | 49.89 | 34.82 |
| 3100 | 349.64 | 168.83 | 68.36 | 49.94 | 34.83 |
| 3102 | 349.18 | 169.33 | 68.38 | 49.97 | 34.83 |
| 3104 | 348.81 | 169.93 | 68.42 | 50    | 34.84 |
| 3106 | 348.43 | 170.46 | 68.48 | 50.06 | 34.86 |
| 3108 | 348.06 | 170.99 | 68.51 | 50.11 | 34.88 |
| 3110 | 347.72 | 171.54 | 68.56 | 50.16 | 34.91 |
| 3112 | 347.27 | 172.06 | 68.6  | 50.21 | 34.91 |
| 3114 | 346.93 | 172.72 | 68.66 | 50.28 | 34.95 |
| 3116 | 346.57 | 173.27 | 68.72 | 50.33 | 34.96 |
| 3118 | 346.16 | 173.82 | 68.76 | 50.38 | 35    |
| 3120 | 345.81 | 174.49 | 68.83 | 50.46 | 35.03 |
| 3122 | 345.44 | 175.01 | 68.85 | 50.49 | 35.02 |
| 3124 | 345.13 | 175.62 | 68.93 | 50.57 | 35.07 |
| 3126 | 344.71 | 176.15 | 68.96 | 50.61 | 35.07 |
| 3128 | 344.38 | 176.81 | 69.02 | 50.65 | 35.09 |
| 3130 | 344.05 | 177.39 | 69.08 | 50.72 | 35.11 |
| 3132 | 343.75 | 177.99 | 69.16 | 50.81 | 35.18 |
| 3134 | 343.41 | 178.57 | 69.21 | 50.86 | 35.2  |
| 3136 | 343.03 | 179.23 | 69.24 | 50.9  | 35.21 |
| 3138 | 342.71 | 179.82 | 69.32 | 50.96 | 35.25 |
| 3140 | 342.37 | 180.38 | 69.34 | 50.99 | 35.24 |
| 3142 | 341.99 | 180.95 | 69.38 | 51.04 | 35.25 |
| 3144 | 341.66 | 181.64 | 69.44 | 51.09 | 35.28 |
| 3146 | 341.38 | 182.27 | 69.52 | 51.18 | 35.32 |
| 3148 | 341.06 | 182.86 | 69.57 | 51.22 | 35.35 |
| 3150 | 340.71 | 183.57 | 69.6  | 51.27 | 35.36 |
| 3152 | 340.39 | 184.15 | 69.65 | 51.31 | 35.37 |
| 3154 | 340.06 | 184.75 | 69.7  | 51.35 | 35.38 |
| 3156 | 339.79 | 185.41 | 69.78 | 51.43 | 35.44 |
| 3158 | 339.43 | 186.12 | 69.82 | 51.48 | 35.45 |

|      |        |        |       |       |       |
|------|--------|--------|-------|-------|-------|
| 3160 | 339.13 | 186.73 | 69.87 | 51.54 | 35.48 |
| 3162 | 338.83 | 187.35 | 69.91 | 51.6  | 35.51 |
| 3164 | 338.54 | 187.95 | 69.95 | 51.64 | 35.51 |
| 3166 | 338.19 | 188.57 | 69.99 | 51.68 | 35.52 |
| 3168 | 337.93 | 189.33 | 70.09 | 51.75 | 35.57 |
| 3170 | 337.67 | 189.97 | 70.15 | 51.84 | 35.61 |
| 3172 | 337.37 | 190.58 | 70.15 | 51.85 | 35.59 |
| 3174 | 337.11 | 191.24 | 70.24 | 51.93 | 35.65 |
| 3176 | 336.8  | 191.98 | 70.29 | 52    | 35.68 |
| 3178 | 336.48 | 192.58 | 70.3  | 52.02 | 35.66 |
| 3180 | 336.21 | 193.23 | 70.36 | 52.08 | 35.68 |
| 3182 | 335.89 | 193.86 | 70.4  | 52.12 | 35.7  |
| 3184 | 335.63 | 194.62 | 70.45 | 52.18 | 35.73 |
| 3186 | 335.4  | 195.31 | 70.54 | 52.29 | 35.79 |
| 3188 | 335.16 | 195.98 | 70.6  | 52.36 | 35.84 |
| 3190 | 334.9  | 196.64 | 70.66 | 52.4  | 35.86 |
| 3192 | 334.61 | 197.41 | 70.72 | 52.48 | 35.9  |
| 3194 | 334.35 | 198.08 | 70.78 | 52.54 | 35.94 |
| 3196 | 334.1  | 198.75 | 70.83 | 52.6  | 35.96 |
| 3198 | 333.86 | 199.43 | 70.88 | 52.68 | 36    |
| 3200 | 333.57 | 200.22 | 70.94 | 52.74 | 36.03 |
| 3202 | 333.34 | 200.9  | 71    | 52.83 | 36.07 |
| 3204 | 333.12 | 201.59 | 71.08 | 52.91 | 36.12 |
| 3206 | 332.85 | 202.27 | 71.13 | 52.97 | 36.15 |
| 3208 | 332.58 | 203.04 | 71.16 | 53    | 36.16 |
| 3210 | 332.35 | 203.72 | 71.21 | 53.06 | 36.18 |
| 3212 | 332.13 | 204.42 | 71.28 | 53.14 | 36.22 |
| 3214 | 331.89 | 205.11 | 71.33 | 53.2  | 36.25 |
| 3216 | 331.61 | 205.77 | 71.36 | 53.25 | 36.27 |
| 3218 | 331.4  | 206.58 | 71.42 | 53.32 | 36.32 |
| 3220 | 331.18 | 207.28 | 71.48 | 53.38 | 36.35 |
| 3222 | 330.94 | 207.96 | 71.52 | 53.44 | 36.37 |
| 3224 | 330.72 | 208.8  | 71.62 | 53.55 | 36.44 |
| 3226 | 330.5  | 209.5  | 71.69 | 53.63 | 36.48 |
| 3228 | 330.29 | 210.21 | 71.76 | 53.69 | 36.52 |
| 3230 | 330.04 | 210.92 | 71.81 | 53.76 | 36.56 |
| 3232 | 329.83 | 211.74 | 71.87 | 53.82 | 36.59 |
| 3234 | 329.6  | 212.43 | 71.91 | 53.88 | 36.62 |
| 3236 | 329.38 | 213.13 | 71.96 | 53.93 | 36.64 |
| 3238 | 329.13 | 213.82 | 71.99 | 53.97 | 36.65 |
| 3240 | 328.95 | 214.69 | 72.1  | 54.07 | 36.72 |
| 3242 | 328.7  | 215.37 | 72.11 | 54.09 | 36.72 |
| 3244 | 328.47 | 216.06 | 72.13 | 54.12 | 36.74 |
| 3246 | 328.27 | 216.94 | 72.22 | 54.23 | 36.81 |



|      |        |        |       |       |       |
|------|--------|--------|-------|-------|-------|
| 3248 | 328.07 | 217.64 | 72.29 | 54.3  | 36.84 |
| 3250 | 327.87 | 218.35 | 72.35 | 54.38 | 36.9  |
| 3252 | 327.69 | 219.09 | 72.42 | 54.45 | 36.93 |
| 3254 | 327.46 | 219.82 | 72.46 | 54.51 | 36.96 |
| 3256 | 327.25 | 220.66 | 72.51 | 54.56 | 36.97 |
| 3258 | 327.07 | 221.39 | 72.58 | 54.65 | 37.03 |
| 3260 | 326.88 | 222.12 | 72.63 | 54.72 | 37.06 |
| 3262 | 326.65 | 222.84 | 72.69 | 54.8  | 37.1  |
| 3264 | 326.46 | 223.69 | 72.74 | 54.86 | 37.12 |
| 3266 | 326.24 | 224.41 | 72.78 | 54.94 | 37.15 |
| 3268 | 326.02 | 225.12 | 72.8  | 54.95 | 37.15 |
| 3270 | 325.82 | 226.01 | 72.88 | 55.06 | 37.22 |
| 3272 | 325.64 | 226.73 | 72.93 | 55.13 | 37.25 |
| 3274 | 325.43 | 227.46 | 72.95 | 55.17 | 37.26 |
| 3276 | 325.23 | 228.19 | 72.99 | 55.21 | 37.28 |
| 3278 | 325.02 | 228.93 | 73.03 | 55.27 | 37.3  |
| 3280 | 324.85 | 229.8  | 73.1  | 55.35 | 37.35 |
| 3282 | 324.65 | 230.53 | 73.13 | 55.41 | 37.37 |
| 3284 | 324.47 | 231.28 | 73.18 | 55.48 | 37.41 |
| 3286 | 324.27 | 232.15 | 73.23 | 55.55 | 37.44 |
| 3288 | 324.09 | 232.89 | 73.28 | 55.62 | 37.48 |
| 3290 | 323.91 | 233.64 | 73.32 | 55.68 | 37.5  |
| 3292 | 323.73 | 234.39 | 73.36 | 55.75 | 37.54 |
| 3294 | 323.57 | 235.15 | 73.42 | 55.84 | 37.58 |
| 3296 | 323.4  | 236.07 | 73.52 | 55.96 | 37.63 |
| 3298 | 323.23 | 236.83 | 73.58 | 56.04 | 37.71 |
| 3300 | 323.08 | 237.62 | 73.65 | 56.12 | 37.77 |
| 3302 | 322.89 | 238.39 | 73.7  | 56.2  | 37.81 |
| 3304 | 322.73 | 239.27 | 73.76 | 56.27 | 37.84 |
| 3306 | 322.52 | 240    | 73.78 | 56.31 | 37.84 |
| 3308 | 322.34 | 240.74 | 73.8  | 56.35 | 37.86 |
| 3310 | 322.18 | 241.54 | 73.87 | 56.44 | 37.93 |
| 3312 | 321.99 | 242.43 | 73.92 | 56.51 | 37.99 |
| 3314 | 321.86 | 243.22 | 73.99 | 56.61 | 38.04 |
| 3316 | 321.7  | 244    | 74.04 | 56.68 | 38.07 |
| 3318 | 321.5  | 244.75 | 74.06 | 56.74 | 38.11 |
| 3320 | 321.36 | 245.5  | 74.1  | 56.78 | 38.14 |
| 3322 | 321.18 | 246.43 | 74.16 | 56.87 | 38.18 |
| 3324 | 321.06 | 247.23 | 74.23 | 56.99 | 38.27 |
| 3326 | 320.89 | 248.14 | 74.3  | 57.08 | 38.32 |
| 3328 | 320.72 | 248.91 | 74.35 | 57.13 | 38.34 |
| 3330 | 320.56 | 249.68 | 74.39 | 57.21 | 38.38 |
| 3332 | 320.38 | 250.45 | 74.41 | 57.25 | 38.42 |
| 3334 | 320.22 | 251.37 | 74.48 | 57.34 | 38.48 |

|      |        |        |       |       |       |
|------|--------|--------|-------|-------|-------|
| 3336 | 320.08 | 252.17 | 74.54 | 57.43 | 38.53 |
| 3338 | 319.9  | 252.93 | 74.57 | 57.48 | 38.57 |
| 3340 | 319.79 | 253.76 | 74.64 | 57.57 | 38.64 |
| 3342 | 319.61 | 254.53 | 74.67 | 57.62 | 38.68 |
| 3344 | 319.46 | 255.45 | 74.73 | 57.71 | 38.72 |
| 3346 | 319.31 | 256.23 | 74.78 | 57.78 | 38.77 |
| 3348 | 319.16 | 256.99 | 74.8  | 57.83 | 38.81 |
| 3350 | 319.02 | 257.96 | 74.88 | 57.94 | 38.88 |
| 3352 | 318.88 | 258.76 | 74.93 | 58.02 | 38.93 |
| 3354 | 318.7  | 259.51 | 74.93 | 58.05 | 38.93 |
| 3356 | 318.58 | 260.33 | 75.02 | 58.16 | 39    |
| 3358 | 318.42 | 261.25 | 75.05 | 58.23 | 39.03 |
| 3360 | 318.29 | 262.04 | 75.11 | 58.31 | 39.08 |
| 3362 | 318.15 | 262.85 | 75.16 | 58.4  | 39.13 |
| 3364 | 318    | 263.61 | 75.18 | 58.45 | 39.16 |
| 3366 | 317.87 | 264.57 | 75.25 | 58.55 | 39.24 |
| 3368 | 317.74 | 265.39 | 75.3  | 58.62 | 39.31 |
| 3370 | 317.56 | 266.14 | 75.3  | 58.65 | 39.32 |
| 3372 | 317.44 | 266.96 | 75.38 | 58.76 | 39.39 |
| 3374 | 317.33 | 267.78 | 75.43 | 58.84 | 39.46 |
| 3376 | 317.2  | 268.72 | 75.48 | 58.93 | 39.52 |
| 3378 | 317.05 | 269.51 | 75.51 | 58.98 | 39.55 |
| 3380 | 316.92 | 270.31 | 75.56 | 59.07 | 39.61 |
| 3382 | 316.74 | 271.08 | 75.56 | 59.12 | 39.64 |
| 3384 | 316.62 | 272.01 | 75.6  | 59.19 | 39.67 |
| 3386 | 316.52 | 272.84 | 75.68 | 59.31 | 39.76 |
| 3388 | 316.39 | 273.65 | 75.72 | 59.39 | 39.82 |
| 3390 | 316.3  | 274.47 | 75.78 | 59.48 | 39.9  |
| 3392 | 316.14 | 275.38 | 75.81 | 59.56 | 39.94 |
| 3394 | 316.02 | 276.19 | 75.86 | 59.63 | 39.99 |
| 3396 | 315.94 | 277.01 | 75.92 | 59.71 | 40.07 |
| 3398 | 315.81 | 277.82 | 75.95 | 59.78 | 40.12 |
| 3400 | 315.65 | 278.72 | 75.96 | 59.81 | 40.13 |
| 3402 | 315.52 | 279.5  | 75.98 | 59.89 | 40.19 |
| 3404 | 315.39 | 280.31 | 76.03 | 59.98 | 40.24 |
| 3406 | 315.25 | 281.1  | 76.05 | 60.02 | 40.28 |
| 3408 | 315.17 | 282.05 | 76.1  | 60.1  | 40.32 |
| 3410 | 315.07 | 282.86 | 76.14 | 60.21 | 40.4  |
| 3412 | 314.95 | 283.67 | 76.18 | 60.27 | 40.44 |
| 3414 | 314.86 | 284.49 | 76.23 | 60.37 | 40.52 |
| 3416 | 314.73 | 285.43 | 76.27 | 60.46 | 40.55 |
| 3418 | 314.64 | 286.24 | 76.33 | 60.55 | 40.63 |
| 3420 | 314.53 | 287.05 | 76.37 | 60.62 | 40.69 |
| 3422 | 314.41 | 287.86 | 76.4  | 60.69 | 40.74 |

|      |        |        |       |       |       |
|------|--------|--------|-------|-------|-------|
| 3424 | 314.31 | 288.79 | 76.44 | 60.76 | 40.78 |
| 3426 | 314.2  | 289.59 | 76.47 | 60.84 | 40.83 |
| 3428 | 314.09 | 290.4  | 76.5  | 60.9  | 40.89 |
| 3430 | 313.97 | 291.19 | 76.52 | 60.94 | 40.93 |
| 3432 | 313.81 | 292.09 | 76.52 | 60.99 | 40.96 |
| 3434 | 313.74 | 292.91 | 76.58 | 61.11 | 41.04 |
| 3436 | 313.66 | 293.74 | 76.63 | 61.18 | 41.1  |
| 3438 | 313.54 | 294.53 | 76.63 | 61.23 | 41.13 |
| 3440 | 313.43 | 295.46 | 76.68 | 61.32 | 41.2  |
| 3442 | 313.28 | 296.2  | 76.65 | 61.34 | 41.17 |
| 3444 | 313.21 | 297.05 | 76.73 | 61.45 | 41.27 |
| 3446 | 313.11 | 297.85 | 76.77 | 61.55 | 41.36 |
| 3448 | 313.03 | 298.81 | 76.82 | 61.64 | 41.41 |
| 3450 | 312.94 | 299.61 | 76.85 | 61.7  | 41.48 |
| 3452 | 312.87 | 300.43 | 76.91 | 61.79 | 41.56 |
| 3454 | 312.78 | 301.25 | 76.94 | 61.87 | 41.62 |
| 3456 | 312.65 | 302.04 | 76.97 | 61.92 | 41.67 |
| 3458 | 312.54 | 302.97 | 76.98 | 61.97 | 41.72 |
| 3460 | 312.41 | 303.74 | 76.99 | 62.02 | 41.76 |
| 3462 | 312.3  | 304.52 | 77    | 62.07 | 41.8  |
| 3464 | 312.23 | 305.47 | 77.05 | 62.15 | 41.89 |
| 3466 | 312.14 | 306.28 | 77.08 | 62.23 | 41.93 |
| 3468 | 312.03 | 307.05 | 77.1  | 62.29 | 41.99 |
| 3470 | 311.93 | 307.86 | 77.13 | 62.35 | 42.05 |
| 3472 | 311.85 | 308.79 | 77.17 | 62.43 | 42.1  |
| 3474 | 311.8  | 309.6  | 77.23 | 62.54 | 42.18 |
| 3476 | 311.71 | 310.39 | 77.25 | 62.59 | 42.22 |
| 3478 | 311.6  | 311.19 | 77.28 | 62.65 | 42.27 |
| 3480 | 311.5  | 312.1  | 77.31 | 62.69 | 42.31 |
| 3482 | 311.42 | 312.9  | 77.34 | 62.78 | 42.37 |
| 3484 | 311.37 | 313.72 | 77.39 | 62.86 | 42.45 |
| 3486 | 311.28 | 314.51 | 77.42 | 62.93 | 42.51 |
| 3488 | 311.17 | 315.43 | 77.43 | 62.97 | 42.55 |
| 3490 | 311.09 | 316.22 | 77.47 | 63.04 | 42.62 |
| 3492 | 311.02 | 317.01 | 77.51 | 63.11 | 42.69 |
| 3494 | 310.93 | 317.81 | 77.54 | 63.19 | 42.74 |
| 3496 | 310.84 | 318.72 | 77.57 | 63.26 | 42.78 |
| 3498 | 310.77 | 319.51 | 77.61 | 63.33 | 42.86 |
| 3500 | 310.73 | 320.33 | 77.66 | 63.41 | 42.95 |
| 3502 | 310.63 | 321.13 | 77.69 | 63.5  | 43.01 |
| 3504 | 310.58 | 322.06 | 77.74 | 63.58 | 43.07 |
| 3506 | 310.5  | 322.85 | 77.78 | 63.65 | 43.12 |
| 3508 | 310.41 | 323.63 | 77.8  | 63.7  | 43.17 |
| 3510 | 310.34 | 324.43 | 77.82 | 63.76 | 43.24 |

|      |        |        |       |       |       |
|------|--------|--------|-------|-------|-------|
| 3512 | 310.28 | 325.37 | 77.88 | 63.87 | 43.33 |
| 3514 | 310.2  | 326.14 | 77.9  | 63.91 | 43.37 |
| 3516 | 310.14 | 326.97 | 77.97 | 64    | 43.44 |
| 3518 | 310.04 | 327.75 | 77.97 | 64.04 | 43.49 |
| 3520 | 309.98 | 328.68 | 78.03 | 64.11 | 43.56 |
| 3522 | 309.94 | 329.48 | 78.07 | 64.21 | 43.65 |
| 3524 | 309.85 | 330.25 | 78.07 | 64.23 | 43.67 |
| 3526 | 309.77 | 331.19 | 78.11 | 64.31 | 43.74 |
| 3528 | 309.71 | 331.97 | 78.14 | 64.35 | 43.79 |
| 3530 | 309.64 | 332.76 | 78.18 | 64.44 | 43.86 |
| 3532 | 309.58 | 333.55 | 78.21 | 64.5  | 43.93 |
| 3534 | 309.52 | 334.34 | 78.24 | 64.57 | 43.99 |
| 3536 | 309.5  | 335.33 | 78.33 | 64.67 | 44.1  |
| 3538 | 309.46 | 336.13 | 78.38 | 64.77 | 44.18 |
| 3540 | 309.4  | 336.93 | 78.42 | 64.85 | 44.25 |
| 3542 | 309.34 | 337.85 | 78.45 | 64.9  | 44.32 |
| 3544 | 309.29 | 338.64 | 78.51 | 64.98 | 44.38 |
| 3546 | 309.25 | 339.46 | 78.55 | 65.05 | 44.47 |
| 3548 | 309.15 | 340.22 | 78.54 | 65.08 | 44.5  |
| 3550 | 309.13 | 341.04 | 78.61 | 65.16 | 44.57 |
| 3552 | 309.07 | 341.97 | 78.63 | 65.22 | 44.65 |
| 3554 | 309    | 342.76 | 78.67 | 65.3  | 44.74 |
| 3556 | 308.97 | 343.56 | 78.72 | 65.37 | 44.8  |
| 3558 | 308.9  | 344.36 | 78.75 | 65.44 | 44.87 |
| 3560 | 308.83 | 345.25 | 78.77 | 65.49 | 44.91 |
| 3562 | 308.8  | 346.07 | 78.82 | 65.58 | 44.98 |
| 3564 | 308.77 | 346.89 | 78.87 | 65.65 | 45.06 |
| 3566 | 308.73 | 347.69 | 78.9  | 65.72 | 45.13 |
| 3568 | 308.67 | 348.62 | 78.94 | 65.8  | 45.19 |
| 3570 | 308.62 | 349.39 | 78.95 | 65.85 | 45.26 |
| 3572 | 308.58 | 350.19 | 78.99 | 65.92 | 45.31 |
| 3574 | 308.5  | 350.97 | 79.01 | 65.97 | 45.35 |
| 3576 | 308.47 | 351.91 | 79.05 | 66.04 | 45.42 |
| 3578 | 308.46 | 352.72 | 79.12 | 66.15 | 45.52 |
| 3580 | 308.42 | 353.52 | 79.15 | 66.21 | 45.6  |
| 3582 | 308.37 | 354.45 | 79.19 | 66.27 | 45.66 |
| 3584 | 308.33 | 355.24 | 79.22 | 66.33 | 45.72 |
| 3586 | 308.3  | 356.05 | 79.26 | 66.41 | 45.82 |
| 3588 | 308.26 | 356.86 | 79.29 | 66.48 | 45.89 |
| 3590 | 308.22 | 357.64 | 79.31 | 66.54 | 45.96 |
| 3592 | 308.17 | 358.55 | 79.34 | 66.6  | 46.01 |
| 3594 | 308.14 | 359.34 | 79.36 | 66.66 | 46.08 |
| 3596 | 308.1  | 360.14 | 79.39 | 66.71 | 46.15 |
| 3598 | 308.09 | 360.96 | 79.44 | 66.81 | 46.25 |

|      |        |        |       |       |       |
|------|--------|--------|-------|-------|-------|
| 3600 | 308.06 | 361.89 | 79.48 | 66.88 | 46.3  |
| 3602 | 308.01 | 362.66 | 79.49 | 66.94 | 46.35 |
| 3604 | 307.97 | 363.45 | 79.51 | 67    | 46.43 |
| 3606 | 307.94 | 364.37 | 79.53 | 67.06 | 46.49 |
| 3608 | 307.9  | 365.15 | 79.56 | 67.12 | 46.56 |
| 3610 | 307.87 | 365.94 | 79.59 | 67.19 | 46.62 |
| 3612 | 307.85 | 366.75 | 79.62 | 67.25 | 46.68 |
| 3614 | 307.82 | 367.54 | 79.64 | 67.3  | 46.74 |
| 3616 | 307.78 | 368.46 | 79.65 | 67.36 | 46.79 |
| 3618 | 307.75 | 369.23 | 79.66 | 67.39 | 46.84 |
| 3620 | 307.71 | 370.01 | 79.69 | 67.47 | 46.92 |
| 3622 | 307.7  | 370.83 | 79.72 | 67.55 | 47    |
| 3624 | 307.67 | 371.74 | 79.75 | 67.6  | 47.05 |
| 3626 | 307.65 | 372.53 | 79.77 | 67.68 | 47.12 |
| 3628 | 307.63 | 373.31 | 79.78 | 67.73 | 47.16 |
| 3630 | 307.63 | 374.11 | 79.81 | 67.81 | 47.24 |
| 3632 | 307.6  | 375.03 | 79.85 | 67.88 | 47.31 |
| 3634 | 307.58 | 375.82 | 79.87 | 67.94 | 47.38 |
| 3636 | 307.59 | 376.64 | 79.92 | 68.03 | 47.48 |
| 3638 | 307.56 | 377.4  | 79.92 | 68.07 | 47.52 |
| 3640 | 307.52 | 378.31 | 79.93 | 68.12 | 47.58 |
| 3642 | 307.49 | 379.07 | 79.93 | 68.15 | 47.63 |
| 3644 | 307.47 | 379.83 | 79.95 | 68.2  | 47.69 |
| 3646 | 307.48 | 380.64 | 80.01 | 68.28 | 47.78 |
| 3648 | 307.47 | 381.56 | 80.03 | 68.33 | 47.85 |
| 3650 | 307.45 | 382.34 | 80.05 | 68.39 | 47.94 |
| 3652 | 307.39 | 383.08 | 80.03 | 68.39 | 47.97 |
| 3654 | 307.4  | 383.89 | 80.08 | 68.47 | 48.06 |
| 3656 | 307.41 | 384.81 | 80.12 | 68.55 | 48.14 |
| 3658 | 307.39 | 385.58 | 80.13 | 68.59 | 48.21 |
| 3660 | 307.37 | 386.35 | 80.15 | 68.63 | 48.28 |
| 3662 | 307.4  | 387.13 | 80.19 | 68.71 | 48.37 |
| 3664 | 307.4  | 388.06 | 80.24 | 68.79 | 48.45 |
| 3666 | 307.41 | 388.84 | 80.26 | 68.85 | 48.52 |
| 3668 | 307.38 | 389.6  | 80.28 | 68.9  | 48.59 |
| 3670 | 307.36 | 390.38 | 80.3  | 68.95 | 48.65 |
| 3672 | 307.36 | 391.27 | 80.35 | 68.99 | 48.72 |
| 3674 | 307.37 | 392.06 | 80.38 | 69.09 | 48.84 |
| 3676 | 307.4  | 392.83 | 80.43 | 69.15 | 48.91 |
| 3678 | 307.38 | 393.58 | 80.44 | 69.16 | 48.94 |
| 3680 | 307.35 | 394.47 | 80.46 | 69.21 | 49.01 |
| 3682 | 307.34 | 395.23 | 80.46 | 69.25 | 49.06 |
| 3684 | 307.34 | 395.99 | 80.49 | 69.31 | 49.13 |
| 3686 | 307.36 | 396.79 | 80.54 | 69.39 | 49.23 |

|      |        |        |       |       |       |
|------|--------|--------|-------|-------|-------|
| 3688 | 307.35 | 397.66 | 80.57 | 69.43 | 49.28 |
| 3690 | 307.34 | 398.39 | 80.58 | 69.47 | 49.34 |
| 3692 | 307.34 | 399.16 | 80.61 | 69.53 | 49.42 |
| 3694 | 307.35 | 400.05 | 80.64 | 69.6  | 49.49 |
| 3696 | 307.35 | 400.82 | 80.7  | 69.65 | 49.55 |
| 3698 | 307.36 | 401.57 | 80.72 | 69.71 | 49.65 |
| 3700 | 307.36 | 402.32 | 80.75 | 69.76 | 49.72 |
| 3702 | 307.36 | 403.08 | 80.79 | 69.81 | 49.8  |
| 3704 | 307.39 | 403.98 | 80.85 | 69.89 | 49.9  |
| 3706 | 307.38 | 404.73 | 80.88 | 69.93 | 49.96 |
| 3708 | 307.38 | 405.46 | 80.89 | 69.95 | 50.02 |
| 3710 | 307.37 | 406.21 | 80.93 | 70.01 | 50.11 |
| 3712 | 307.39 | 407.1  | 80.96 | 70.06 | 50.18 |
| 3714 | 307.41 | 407.85 | 81    | 70.13 | 50.27 |
| 3716 | 307.42 | 408.6  | 81.04 | 70.18 | 50.34 |
| 3718 | 307.45 | 409.49 | 81.11 | 70.26 | 50.42 |
| 3720 | 307.44 | 410.22 | 81.13 | 70.29 | 50.46 |
| 3722 | 307.46 | 410.98 | 81.17 | 70.35 | 50.51 |
| 3724 | 307.47 | 411.75 | 81.21 | 70.41 | 50.59 |
| 3726 | 307.49 | 412.49 | 81.26 | 70.47 | 50.66 |
| 3728 | 307.49 | 413.35 | 81.31 | 70.52 | 50.72 |
| 3730 | 307.51 | 414.12 | 81.36 | 70.58 | 50.8  |
| 3732 | 307.55 | 414.88 | 81.42 | 70.65 | 50.89 |
| 3734 | 307.57 | 415.63 | 81.47 | 70.7  | 50.96 |
| 3736 | 307.57 | 416.49 | 81.53 | 70.73 | 51.01 |
| 3738 | 307.6  | 417.27 | 81.62 | 70.82 | 51.12 |
| 3740 | 307.6  | 418    | 81.66 | 70.83 | 51.16 |
| 3742 | 307.62 | 418.74 | 81.73 | 70.87 | 51.22 |
| 3744 | 307.64 | 419.61 | 81.84 | 70.92 | 51.29 |
| 3746 | 307.65 | 420.37 | 81.94 | 70.98 | 51.37 |
| 3748 | 307.67 | 421.12 | 82.06 | 71.03 | 51.43 |
| 3750 | 307.72 | 422    | 82.21 | 71.09 | 51.5  |
| 3752 | 307.72 | 422.73 | 82.41 | 71.15 | 51.56 |
| 3754 | 307.74 | 423.47 | 82.62 | 71.2  | 51.63 |
| 3756 | 307.77 | 424.21 | 82.85 | 71.26 | 51.7  |
| 3758 | 307.78 | 424.96 | 83.11 | 71.29 | 51.76 |
| 3760 | 307.81 | 425.84 | 83.39 | 71.34 | 51.82 |
| 3762 | 307.85 | 426.58 | 83.76 | 71.41 | 51.89 |
| 3764 | 307.85 | 427.31 | 84.09 | 71.45 | 51.95 |
| 3766 | 307.9  | 428.2  | 84.48 | 71.5  | 52.02 |
| 3768 | 307.92 | 428.95 | 84.93 | 71.54 | 52.08 |
| 3770 | 307.94 | 429.68 | 85.33 | 71.6  | 52.15 |
| 3772 | 307.97 | 430.42 | 85.75 | 71.64 | 52.21 |
| 3774 | 307.98 | 431.16 | 86.18 | 71.66 | 52.26 |

|      |        |        |        |       |       |
|------|--------|--------|--------|-------|-------|
| 3776 | 308.02 | 432.02 | 86.73  | 71.69 | 52.33 |
| 3778 | 308.03 | 432.75 | 87.21  | 71.73 | 52.4  |
| 3780 | 308.1  | 433.53 | 87.75  | 71.83 | 52.5  |
| 3782 | 308.12 | 434.25 | 88.25  | 71.86 | 52.55 |
| 3784 | 308.14 | 435.1  | 88.87  | 71.87 | 52.61 |
| 3786 | 308.19 | 435.88 | 89.44  | 71.93 | 52.72 |
| 3788 | 308.21 | 436.6  | 89.99  | 71.97 | 52.78 |
| 3790 | 308.21 | 437.32 | 90.56  | 71.98 | 52.83 |
| 3792 | 308.24 | 438.06 | 91.15  | 72.01 | 52.9  |
| 3794 | 308.26 | 438.91 | 91.85  | 72.05 | 52.97 |
| 3796 | 308.32 | 439.67 | 92.49  | 72.1  | 53.05 |
| 3798 | 308.34 | 440.4  | 93.14  | 72.14 | 53.11 |
| 3800 | 308.38 | 441.26 | 93.78  | 72.17 | 53.18 |
| 3802 | 308.42 | 442.03 | 94.59  | 72.23 | 53.27 |
| 3804 | 308.46 | 442.78 | 95.27  | 72.25 | 53.34 |
| 3806 | 308.5  | 443.51 | 95.95  | 72.28 | 53.39 |
| 3808 | 308.56 | 444.39 | 96.8   | 72.34 | 53.49 |
| 3810 | 308.58 | 445.11 | 97.51  | 72.39 | 53.56 |
| 3812 | 308.61 | 445.84 | 98.24  | 72.39 | 53.61 |
| 3814 | 308.64 | 446.7  | 98.96  | 72.41 | 53.65 |
| 3816 | 308.69 | 447.31 | 99.72  | 72.46 | 53.73 |
| 3818 | 308.71 | 448.17 | 100.62 | 72.5  | 53.8  |
| 3820 | 308.72 | 448.88 | 101.36 | 72.49 | 53.84 |
| 3822 | 308.76 | 449.61 | 102.14 | 72.5  | 53.89 |
| 3824 | 308.81 | 450.48 | 102.96 | 72.55 | 53.97 |
| 3826 | 308.87 | 451.23 | 103.91 | 72.6  | 54.02 |
| 3828 | 308.88 | 451.94 | 104.71 | 72.61 | 54.08 |
| 3830 | 308.91 | 452.67 | 105.53 | 72.63 | 54.12 |
| 3832 | 308.95 | 453.39 | 106.37 | 72.65 | 54.18 |
| 3834 | 309    | 454.26 | 107.36 | 72.72 | 54.26 |
| 3836 | 309.05 | 454.99 | 108.2  | 72.74 | 54.31 |
| 3838 | 309.06 | 455.69 | 109.06 | 72.75 | 54.35 |
| 3840 | 309.13 | 456.56 | 110.1  | 72.82 | 54.42 |
| 3842 | 309.16 | 457.27 | 110.97 | 72.85 | 54.48 |
| 3844 | 309.2  | 457.98 | 111.87 | 72.88 | 54.53 |
| 3846 | 309.25 | 458.71 | 112.75 | 72.89 | 54.57 |
| 3848 | 309.27 | 459.52 | 113.65 | 72.92 | 54.63 |
| 3850 | 309.32 | 460.25 | 114.73 | 72.96 | 54.69 |
| 3852 | 309.37 | 460.98 | 115.67 | 73    | 54.76 |
| 3854 | 309.42 | 461.7  | 116.62 | 73.04 | 54.82 |
| 3856 | 309.47 | 462.54 | 117.72 | 73.08 | 54.87 |
| 3858 | 309.51 | 463.25 | 118.51 | 73.1  | 54.93 |
| 3860 | 309.55 | 463.96 | 119.63 | 73.13 | 55    |
| 3862 | 309.59 | 464.66 | 120.61 | 73.16 | 55.05 |

|      |        |        |        |       |       |
|------|--------|--------|--------|-------|-------|
| 3864 | 309.64 | 465.49 | 121.74 | 73.19 | 55.1  |
| 3866 | 309.66 | 466.18 | 122.71 | 73.2  | 55.14 |
| 3868 | 309.7  | 466.88 | 123.69 | 73.23 | 55.2  |
| 3870 | 309.75 | 467.61 | 124.71 | 73.28 | 55.26 |
| 3872 | 309.83 | 468.45 | 125.92 | 73.34 | 55.35 |
| 3874 | 309.85 | 469.14 | 126.9  | 73.34 | 55.4  |
| 3876 | 309.89 | 469.84 | 127.92 | 73.35 | 55.46 |
| 3878 | 309.93 | 470.53 | 128.94 | 73.39 | 55.52 |
| 3880 | 309.92 | 471.17 | 129.93 | 73.36 | 55.53 |
| 3882 | 309.99 | 472.01 | 131.16 | 73.4  | 55.59 |
| 3884 | 310.03 | 472.7  | 132.22 | 73.44 | 55.67 |
| 3886 | 310.07 | 473.37 | 133.27 | 73.46 | 55.72 |
| 3888 | 310.18 | 474.22 | 134.37 | 73.55 | 55.83 |
| 3890 | 310.23 | 474.91 | 135.63 | 73.59 | 55.89 |
| 3892 | 310.27 | 475.59 | 136.69 | 73.62 | 55.96 |
| 3894 | 310.32 | 476.28 | 137.77 | 73.65 | 56.01 |
| 3896 | 310.36 | 476.97 | 138.85 | 73.69 | 56.07 |
| 3898 | 310.41 | 477.76 | 140.11 | 73.73 | 56.14 |
| 3900 | 310.46 | 478.43 | 141.21 | 73.76 | 56.2  |
| 3902 | 310.5  | 479.1  | 142.31 | 73.78 | 56.27 |
| 3904 | 310.52 | 479.88 | 143.39 | 73.77 | 56.32 |
| 3906 | 310.59 | 480.56 | 144.7  | 73.81 | 56.4  |
| 3908 | 310.64 | 481.25 | 145.81 | 73.84 | 56.49 |
| 3910 | 310.68 | 481.93 | 146.95 | 73.88 | 56.56 |
| 3912 | 310.75 | 482.6  | 148.07 | 73.91 | 56.63 |
| 3914 | 310.79 | 483.38 | 149.4  | 73.94 | 56.7  |
| 3916 | 310.84 | 484.05 | 150.53 | 73.99 | 56.79 |
| 3918 | 310.89 | 484.71 | 151.66 | 74.02 | 56.86 |
| 3920 | 310.94 | 485.46 | 152.79 | 74.04 | 56.92 |
| 3922 | 310.99 | 486.12 | 154.15 | 74.09 | 57.01 |
| 3924 | 311.05 | 486.8  | 155.31 | 74.13 | 57.1  |
| 3926 | 311.09 | 487.44 | 156.44 | 74.16 | 57.16 |
| 3928 | 311.13 | 488.08 | 157.59 | 74.18 | 57.21 |
| 3930 | 311.15 | 488.83 | 158.93 | 74.19 | 57.24 |
| 3932 | 311.21 | 489.48 | 160.11 | 74.22 | 57.33 |
| 3934 | 311.26 | 490.13 | 161.28 | 74.25 | 57.37 |
| 3936 | 311.31 | 490.87 | 162.45 | 74.27 | 57.42 |
| 3938 | 311.35 | 491.52 | 163.8  | 74.29 | 57.45 |
| 3940 | 311.39 | 492.16 | 164.97 | 74.33 | 57.53 |
| 3942 | 311.46 | 492.81 | 166.17 | 74.38 | 57.59 |
| 3944 | 311.53 | 493.56 | 167.37 | 74.4  | 57.64 |
| 3946 | 311.59 | 494.2  | 168.76 | 74.46 | 57.71 |
| 3948 | 311.62 | 494.84 | 169.95 | 74.49 | 57.75 |
| 3950 | 311.67 | 495.47 | 171.13 | 74.53 | 57.79 |



|      |        |        |        |       |       |
|------|--------|--------|--------|-------|-------|
| 3952 | 311.75 | 496.12 | 172.36 | 74.57 | 57.86 |
| 3954 | 311.81 | 496.88 | 173.78 | 74.62 | 57.93 |
| 3956 | 311.84 | 497.49 | 174.97 | 74.64 | 57.98 |
| 3958 | 311.9  | 498.12 | 176.2  | 74.68 | 58.05 |
| 3960 | 311.96 | 498.85 | 177.4  | 74.72 | 58.11 |
| 3962 | 312    | 499.48 | 178.81 | 74.74 | 58.16 |
| 3964 | 312.04 | 500.11 | 180.02 | 74.76 | 58.22 |
| 3966 | 312.08 | 500.73 | 181.23 | 74.81 | 58.29 |
| 3968 | 312.15 | 501.35 | 182.46 | 74.85 | 58.35 |
| 3970 | 312.2  | 502.07 | 183.68 | 74.88 | 58.4  |
| 3972 | 312.22 | 502.68 | 185.09 | 74.9  | 58.45 |
| 3974 | 312.28 | 503.31 | 186.35 | 74.93 | 58.53 |
| 3976 | 312.34 | 504.03 | 187.59 | 74.96 | 58.59 |
| 3978 | 312.39 | 504.65 | 189.03 | 75    | 58.64 |
| 3980 | 312.44 | 505.27 | 190.27 | 75.04 | 58.72 |
| 3982 | 312.48 | 505.87 | 191.51 | 75.07 | 58.77 |
| 3984 | 312.53 | 506.47 | 192.75 | 75.09 | 58.82 |
| 3986 | 312.59 | 507.18 | 193.99 | 75.13 | 58.88 |
| 3988 | 312.64 | 507.8  | 195.46 | 75.17 | 58.95 |
| 3990 | 312.69 | 508.4  | 196.71 | 75.21 | 59.02 |
| 3992 | 312.73 | 508.99 | 197.95 | 75.23 | 59.07 |
| 3994 | 312.77 | 509.69 | 199.44 | 75.27 | 59.15 |
| 3996 | 312.84 | 510.3  | 200.72 | 75.33 | 59.22 |
| 3998 | 312.88 | 510.9  | 201.98 | 75.37 | 59.31 |
| 4000 | 312.91 | 511.48 | 203.24 | 75.4  | 59.37 |
| 4002 | 312.97 | 512.17 | 204.72 | 75.44 | 59.43 |
| 4004 | 313.01 | 512.75 | 205.99 | 75.48 | 59.51 |
| 4006 | 313.06 | 513.35 | 207.28 | 75.54 | 59.59 |
| 4008 | 313.1  | 513.93 | 208.54 | 75.58 | 59.65 |
| 4010 | 313.15 | 514.61 | 209.81 | 75.61 | 59.72 |
| 4012 | 313.17 | 515.17 | 211.29 | 75.63 | 59.77 |
| 4014 | 313.2  | 515.75 | 212.58 | 75.66 | 59.85 |
| 4016 | 313.24 | 516.32 | 213.86 | 75.7  | 59.92 |
| 4018 | 313.28 | 516.98 | 215.37 | 75.73 | 59.98 |
| 4020 | 313.31 | 517.53 | 216.66 | 75.78 | 60.05 |
| 4022 | 313.34 | 518.09 | 217.93 | 75.81 | 60.11 |
| 4024 | 313.39 | 518.66 | 219.23 | 75.86 | 60.18 |
| 4026 | 313.42 | 519.22 | 220.54 | 75.89 | 60.25 |
| 4028 | 313.5  | 519.89 | 222.08 | 75.98 | 60.37 |
| 4030 | 313.53 | 520.44 | 223.38 | 76.02 | 60.44 |
| 4032 | 313.57 | 521    | 224.69 | 76.05 | 60.5  |
| 4034 | 313.57 | 521.6  | 225.96 | 76.04 | 60.52 |
| 4036 | 313.64 | 522.19 | 227.52 | 76.13 | 60.63 |
| 4038 | 313.66 | 522.72 | 228.83 | 76.15 | 60.7  |

|      |        |        |        |       |       |
|------|--------|--------|--------|-------|-------|
| 4040 | 313.69 | 523.24 | 230.13 | 76.19 | 60.77 |
| 4042 | 313.72 | 523.87 | 231.68 | 76.23 | 60.85 |
| 4044 | 313.75 | 524.39 | 232.97 | 76.25 | 60.91 |
| 4046 | 313.8  | 524.95 | 234.31 | 76.32 | 61    |
| 4048 | 313.82 | 525.47 | 235.62 | 76.34 | 61.06 |
| 4050 | 313.86 | 526.08 | 237.17 | 76.39 | 61.13 |
| 4052 | 313.88 | 526.59 | 238.48 | 76.43 | 61.18 |
| 4054 | 313.91 | 527.09 | 239.8  | 76.45 | 61.23 |
| 4056 | 313.96 | 527.64 | 241.15 | 76.49 | 61.33 |
| 4058 | 313.97 | 528.23 | 242.69 | 76.52 | 61.38 |
| 4060 | 314.01 | 528.73 | 244.04 | 76.57 | 61.45 |
| 4062 | 314.05 | 529.25 | 245.4  | 76.62 | 61.54 |
| 4064 | 314.07 | 529.75 | 246.72 | 76.63 | 61.57 |
| 4066 | 314.12 | 530.28 | 248.08 | 76.69 | 61.66 |
| 4068 | 314.15 | 530.86 | 249.67 | 76.74 | 61.74 |
| 4070 | 314.2  | 531.38 | 251.02 | 76.78 | 61.82 |
| 4072 | 314.25 | 531.88 | 252.37 | 76.83 | 61.89 |
| 4074 | 314.28 | 532.46 | 253.74 | 76.87 | 61.95 |
| 4076 | 314.3  | 532.94 | 255.32 | 76.9  | 62.02 |
| 4078 | 314.35 | 533.45 | 256.68 | 76.94 | 62.1  |
| 4080 | 314.39 | 533.96 | 258.04 | 76.98 | 62.17 |
| 4082 | 314.41 | 534.53 | 259.65 | 77.02 | 62.25 |
| 4084 | 314.46 | 535.01 | 261.01 | 77.06 | 62.32 |
| 4086 | 314.49 | 535.5  | 262.38 | 77.1  | 62.38 |
| 4088 | 314.53 | 536.01 | 263.75 | 77.15 | 62.47 |
| 4090 | 314.56 | 536.55 | 265.33 | 77.16 | 62.53 |
| 4092 | 314.59 | 537.03 | 266.69 | 77.19 | 62.59 |
| 4094 | 314.61 | 537.48 | 268.04 | 77.2  | 62.65 |
| 4096 | 314.65 | 538.04 | 269.41 | 77.22 | 62.73 |
| 4098 | 314.69 | 538.53 | 271.02 | 77.29 | 62.83 |
| 4100 | 314.73 | 539    | 272.38 | 77.32 | 62.92 |
| 4102 | 314.77 | 539.47 | 273.75 | 77.36 | 62.99 |
| 4104 | 314.82 | 539.93 | 275.11 | 77.4  | 63.07 |
| 4106 | 314.86 | 540.39 | 276.45 | 77.44 | 63.15 |
| 4108 | 314.9  | 540.91 | 278.02 | 77.46 | 63.22 |
| 4110 | 314.94 | 541.37 | 279.37 | 77.5  | 63.3  |
| 4112 | 314.94 | 541.79 | 280.67 | 77.49 | 63.33 |
| 4114 | 315    | 542.35 | 282.01 | 77.54 | 63.42 |
| 4116 | 315.05 | 542.79 | 283.59 | 77.59 | 63.5  |
| 4118 | 315.06 | 543.22 | 284.9  | 77.6  | 63.56 |
| 4120 | 315.08 | 543.66 | 286.22 | 77.63 | 63.61 |
| 4122 | 315.13 | 544.17 | 287.77 | 77.65 | 63.67 |
| 4124 | 315.14 | 544.57 | 289.05 | 77.65 | 63.71 |
| 4126 | 315.21 | 545.05 | 290.4  | 77.72 | 63.81 |

|      |        |        |        |       |       |
|------|--------|--------|--------|-------|-------|
| 4128 | 315.21 | 545.45 | 291.69 | 77.72 | 63.84 |
| 4130 | 315.28 | 545.98 | 293.02 | 77.76 | 63.93 |
| 4132 | 315.31 | 546.41 | 294.55 | 77.79 | 64    |
| 4134 | 315.33 | 546.82 | 295.81 | 77.8  | 64.05 |
| 4136 | 315.33 | 547.21 | 297.09 | 77.8  | 64.07 |
| 4138 | 315.37 | 547.72 | 298.6  | 77.85 | 64.16 |
| 4140 | 315.4  | 548.15 | 299.89 | 77.89 | 64.21 |
| 4142 | 315.47 | 548.59 | 301.2  | 77.93 | 64.31 |
| 4144 | 315.5  | 549    | 302.46 | 77.95 | 64.35 |
| 4146 | 315.53 | 549.5  | 303.75 | 77.99 | 64.4  |
| 4148 | 315.56 | 549.93 | 305.24 | 78.02 | 64.48 |
| 4150 | 315.6  | 550.34 | 306.51 | 78.05 | 64.54 |
| 4152 | 315.63 | 550.76 | 307.77 | 78.07 | 64.6  |
| 4154 | 315.66 | 551.24 | 309.23 | 78.1  | 64.66 |
| 4156 | 315.69 | 551.64 | 310.48 | 78.13 | 64.74 |
| 4158 | 315.72 | 552.05 | 311.73 | 78.17 | 64.8  |
| 4160 | 315.74 | 552.44 | 312.97 | 78.18 | 64.84 |
| 4162 | 315.78 | 552.93 | 314.24 | 78.22 | 64.93 |
| 4164 | 315.81 | 553.33 | 315.69 | 78.25 | 64.99 |
| 4166 | 315.84 | 553.73 | 316.93 | 78.29 | 65.07 |
| 4168 | 315.86 | 554.1  | 318.15 | 78.3  | 65.12 |
| 4170 | 315.9  | 554.58 | 319.4  | 78.35 | 65.19 |
| 4172 | 315.93 | 554.96 | 320.83 | 78.39 | 65.24 |
| 4174 | 315.97 | 555.36 | 322.06 | 78.42 | 65.32 |
| 4176 | 316.01 | 555.77 | 323.31 | 78.47 | 65.41 |
| 4178 | 316.05 | 556.15 | 324.53 | 78.5  | 65.47 |
| 4180 | 316.07 | 556.59 | 325.94 | 78.52 | 65.53 |
| 4182 | 316.1  | 556.97 | 327.16 | 78.56 | 65.58 |
| 4184 | 316.14 | 557.36 | 328.38 | 78.59 | 65.65 |
| 4186 | 316.19 | 557.76 | 329.6  | 78.63 | 65.73 |
| 4188 | 316.23 | 558.22 | 331.03 | 78.67 | 65.8  |
| 4190 | 316.25 | 558.58 | 332.22 | 78.71 | 65.85 |
| 4192 | 316.3  | 558.98 | 333.44 | 78.76 | 65.94 |
| 4194 | 316.32 | 559.38 | 334.63 | 78.75 | 65.97 |
| 4196 | 316.35 | 559.74 | 336.03 | 78.77 | 66.02 |
| 4198 | 316.38 | 560.11 | 337.22 | 78.81 | 66.1  |
| 4200 | 316.44 | 560.5  | 338.45 | 78.87 | 66.16 |
| 4202 | 316.5  | 560.88 | 339.67 | 78.94 | 66.26 |
| 4204 | 316.54 | 561.33 | 341.07 | 78.99 | 66.33 |
| 4206 | 316.56 | 561.67 | 342.25 | 79    | 66.41 |
| 4208 | 316.61 | 562.05 | 343.45 | 79.04 | 66.5  |
| 4210 | 316.62 | 562.38 | 344.6  | 79.03 | 66.57 |
| 4212 | 316.66 | 562.79 | 345.78 | 79.04 | 66.65 |
| 4214 | 316.7  | 563.16 | 347.2  | 79.08 | 66.76 |

|      |        |        |        |       |       |
|------|--------|--------|--------|-------|-------|
| 4216 | 316.73 | 563.52 | 348.39 | 79.1  | 66.85 |
| 4218 | 316.77 | 563.89 | 349.57 | 79.14 | 66.96 |
| 4220 | 316.8  | 564.28 | 350.93 | 79.17 | 67.02 |
| 4222 | 316.82 | 564.61 | 352.09 | 79.19 | 67.11 |
| 4224 | 316.86 | 564.96 | 353.26 | 79.22 | 67.19 |
| 4226 | 316.89 | 565.37 | 354.44 | 79.27 | 67.27 |
| 4228 | 316.92 | 565.7  | 355.79 | 79.29 | 67.34 |
| 4230 | 316.96 | 566.07 | 356.98 | 79.33 | 67.42 |
| 4232 | 316.99 | 566.41 | 358.12 | 79.35 | 67.49 |
| 4234 | 317.02 | 566.74 | 359.3  | 79.38 | 67.58 |
| 4236 | 317.08 | 567.18 | 360.49 | 79.44 | 67.69 |
| 4238 | 317.15 | 567.55 | 361.91 | 79.54 | 67.79 |
| 4240 | 317.19 | 567.89 | 363.08 | 79.58 | 67.89 |
| 4242 | 317.21 | 568.23 | 364.23 | 79.61 | 67.96 |
| 4244 | 317.23 | 568.61 | 365.57 | 79.62 | 68.01 |
| 4246 | 317.29 | 568.98 | 366.76 | 79.69 | 68.11 |
| 4248 | 317.32 | 569.31 | 367.92 | 79.72 | 68.19 |
| 4250 | 317.37 | 569.67 | 369.11 | 79.76 | 68.28 |
| 4252 | 317.42 | 570.01 | 370.29 | 79.81 | 68.36 |
| 4254 | 317.46 | 570.4  | 371.65 | 79.86 | 68.43 |
| 4256 | 317.5  | 570.74 | 372.82 | 79.9  | 68.5  |
| 4258 | 317.55 | 571.08 | 373.98 | 79.94 | 68.57 |
| 4260 | 317.59 | 571.46 | 375.15 | 79.99 | 68.64 |
| 4262 | 317.63 | 571.79 | 376.51 | 80.04 | 68.72 |
| 4264 | 317.67 | 572.09 | 377.67 | 80.08 | 68.78 |
| 4266 | 317.7  | 572.45 | 378.8  | 80.11 | 68.84 |
| 4268 | 317.78 | 572.8  | 380.19 | 80.2  | 68.93 |
| 4270 | 317.82 | 573.14 | 381.36 | 80.27 | 69.01 |
| 4272 | 317.87 | 573.46 | 382.52 | 80.32 | 69.07 |
| 4274 | 317.88 | 573.75 | 383.66 | 80.36 | 69.12 |
| 4276 | 317.92 | 574.14 | 384.82 | 80.42 | 69.19 |
| 4278 | 317.96 | 574.42 | 386.15 | 80.49 | 69.25 |
| 4280 | 318.01 | 574.76 | 387.3  | 80.58 | 69.34 |
| 4282 | 318.08 | 575.07 | 388.47 | 80.68 | 69.39 |
| 4284 | 318.11 | 575.42 | 389.81 | 80.77 | 69.47 |
| 4286 | 318.16 | 575.75 | 390.95 | 80.9  | 69.55 |
| 4288 | 318.23 | 576.09 | 392.13 | 81.05 | 69.67 |
| 4290 | 318.29 | 576.42 | 393.28 | 81.21 | 69.76 |
| 4292 | 318.31 | 576.75 | 394.42 | 81.39 | 69.82 |
| 4294 | 318.38 | 577.08 | 395.78 | 81.64 | 69.9  |
| 4296 | 318.43 | 577.4  | 396.93 | 81.88 | 69.98 |
| 4298 | 318.46 | 577.67 | 398.03 | 82.11 | 70.03 |
| 4300 | 318.51 | 578.02 | 399.17 | 82.41 | 70.11 |
| 4302 | 318.58 | 578.35 | 400.53 | 82.83 | 70.23 |

|      |        |        |        |        |       |
|------|--------|--------|--------|--------|-------|
| 4304 | 318.62 | 578.65 | 401.66 | 83.19  | 70.32 |
| 4306 | 318.64 | 578.93 | 402.76 | 83.54  | 70.38 |
| 4308 | 318.68 | 579.26 | 404.07 | 83.93  | 70.46 |
| 4310 | 318.75 | 579.57 | 405.21 | 84.46  | 70.58 |
| 4312 | 318.79 | 579.84 | 406.31 | 84.93  | 70.65 |
| 4314 | 318.89 | 580.19 | 407.5  | 85.49  | 70.77 |
| 4316 | 318.95 | 580.53 | 408.62 | 86.02  | 70.87 |
| 4318 | 318.98 | 580.82 | 409.89 | 86.65  | 70.92 |
| 4320 | 319    | 581.09 | 410.99 | 87.21  | 70.97 |
| 4322 | 319.07 | 581.39 | 412.11 | 87.84  | 71.06 |
| 4324 | 319.11 | 581.71 | 413.37 | 88.47  | 71.13 |
| 4326 | 319.17 | 582.01 | 414.48 | 89.26  | 71.21 |
| 4328 | 319.24 | 582.32 | 415.59 | 89.97  | 71.32 |
| 4330 | 319.31 | 582.64 | 416.71 | 90.72  | 71.43 |
| 4332 | 319.35 | 582.93 | 417.79 | 91.44  | 71.49 |
| 4334 | 319.41 | 583.26 | 419.05 | 92.19  | 71.55 |
| 4336 | 319.47 | 583.56 | 420.13 | 93.08  | 71.63 |
| 4338 | 319.51 | 583.83 | 421.21 | 93.85  | 71.68 |
| 4340 | 319.62 | 584.21 | 422.31 | 94.7   | 71.76 |
| 4342 | 319.68 | 584.51 | 423.59 | 95.68  | 71.84 |
| 4344 | 319.76 | 584.82 | 424.67 | 96.52  | 71.94 |
| 4346 | 319.81 | 585.1  | 425.72 | 97.34  | 71.98 |
| 4348 | 319.88 | 585.4  | 426.79 | 98.21  | 72.07 |
| 4350 | 319.92 | 585.71 | 428.01 | 99.03  | 72.11 |
| 4352 | 319.94 | 585.97 | 429.06 | 100.04 | 72.14 |
| 4354 | 320.04 | 586.28 | 430.14 | 100.96 | 72.22 |
| 4356 | 320.1  | 586.61 | 431.18 | 101.85 | 72.27 |
| 4358 | 320.2  | 586.93 | 432.44 | 102.82 | 72.38 |
| 4360 | 320.24 | 587.2  | 433.48 | 103.87 | 72.42 |
| 4362 | 320.32 | 587.5  | 434.53 | 104.81 | 72.49 |
| 4364 | 320.36 | 587.83 | 435.74 | 105.74 | 72.54 |
| 4366 | 320.45 | 588.13 | 436.81 | 106.88 | 72.59 |
| 4368 | 320.5  | 588.4  | 437.85 | 107.85 | 72.69 |
| 4370 | 320.56 | 588.68 | 438.87 | 108.82 | 72.77 |
| 4372 | 320.67 | 589    | 439.94 | 109.85 | 72.88 |
| 4374 | 320.7  | 589.3  | 440.93 | 110.82 | 72.93 |
| 4376 | 320.77 | 589.58 | 442.15 | 111.99 | 73.02 |
| 4378 | 320.82 | 589.86 | 443.18 | 112.99 | 73.12 |
| 4380 | 320.91 | 590.2  | 444.21 | 114.03 | 73.23 |
| 4382 | 320.99 | 590.49 | 445.43 | 115.08 | 73.32 |
| 4384 | 321.09 | 590.81 | 446.49 | 116.34 | 73.47 |
| 4386 | 321.16 | 591.09 | 447.51 | 117.41 | 73.57 |
| 4388 | 321.21 | 591.35 | 448.51 | 118.45 | 73.64 |
| 4390 | 321.28 | 591.67 | 449.69 | 119.54 | 73.74 |

|      |        |        |        |        |       |
|------|--------|--------|--------|--------|-------|
| 4392 | 321.33 | 591.93 | 450.69 | 120.8  | 73.82 |
| 4394 | 321.43 | 592.24 | 451.72 | 121.91 | 73.91 |
| 4396 | 321.53 | 592.57 | 452.76 | 123.03 | 74.01 |
| 4398 | 321.57 | 592.81 | 453.91 | 124.11 | 74.05 |
| 4400 | 321.66 | 593.11 | 454.93 | 125.46 | 74.16 |
| 4402 | 321.7  | 593.35 | 455.9  | 126.56 | 74.18 |
| 4404 | 321.82 | 593.67 | 456.93 | 127.73 | 74.28 |
| 4406 | 321.89 | 593.94 | 458.08 | 129.09 | 74.34 |
| 4408 | 321.97 | 594.21 | 459.08 | 130.26 | 74.41 |
| 4410 | 322.02 | 594.45 | 460.07 | 131.42 | 74.48 |
| 4412 | 322.13 | 594.71 | 461.07 | 132.61 | 74.57 |
| 4414 | 322.2  | 595.02 | 462.22 | 133.81 | 74.66 |
| 4416 | 322.28 | 595.27 | 463.21 | 135.23 | 74.74 |
| 4418 | 322.35 | 595.52 | 464.18 | 136.45 | 74.84 |
| 4420 | 322.42 | 595.78 | 465.16 | 137.68 | 74.93 |
| 4422 | 322.49 | 596.06 | 466.29 | 138.89 | 75.01 |
| 4424 | 322.58 | 596.32 | 467.25 | 140.34 | 75.13 |
| 4426 | 322.65 | 596.56 | 468.23 | 141.6  | 75.25 |
| 4428 | 322.7  | 596.8  | 469.18 | 142.85 | 75.36 |
| 4430 | 322.74 | 597    | 470.09 | 144.06 | 75.43 |
| 4432 | 322.82 | 597.29 | 471.22 | 145.53 | 75.57 |
| 4434 | 322.93 | 597.57 | 472.2  | 146.85 | 75.73 |
| 4436 | 322.99 | 597.79 | 473.13 | 148.11 | 75.83 |
| 4438 | 323.08 | 598.08 | 474.06 | 149.41 | 75.93 |
| 4440 | 323.15 | 598.31 | 475.17 | 150.93 | 76.04 |
| 4442 | 323.23 | 598.52 | 476.1  | 152.23 | 76.17 |
| 4444 | 323.31 | 598.74 | 477.03 | 153.55 | 76.27 |
| 4446 | 323.39 | 599.01 | 478.11 | 154.85 | 76.39 |
| 4448 | 323.5  | 599.28 | 479.06 | 156.44 | 76.57 |
| 4450 | 323.6  | 599.53 | 480.02 | 157.79 | 76.71 |
| 4452 | 323.69 | 599.76 | 480.93 | 159.14 | 76.83 |
| 4454 | 323.77 | 600.03 | 481.85 | 160.48 | 76.95 |
| 4456 | 323.85 | 600.26 | 482.91 | 162.06 | 77.1  |
| 4458 | 323.92 | 600.48 | 483.82 | 163.4  | 77.26 |
| 4460 | 324    | 600.71 | 484.72 | 164.74 | 77.42 |
| 4462 | 324.05 | 600.94 | 485.73 | 166.07 | 77.54 |
| 4464 | 324.13 | 601.18 | 486.64 | 167.66 | 77.73 |
| 4466 | 324.21 | 601.4  | 487.53 | 169.03 | 77.89 |
| 4468 | 324.31 | 601.65 | 488.45 | 170.44 | 78.09 |
| 4470 | 324.42 | 601.94 | 489.36 | 171.86 | 78.31 |
| 4472 | 324.53 | 602.18 | 490.41 | 173.3  | 78.54 |
| 4474 | 324.6  | 602.39 | 491.29 | 174.93 | 78.79 |
| 4476 | 324.68 | 602.61 | 492.17 | 176.33 | 79.01 |
| 4478 | 324.73 | 602.85 | 493.14 | 177.71 | 79.22 |

|      |        |        |        |        |        |
|------|--------|--------|--------|--------|--------|
| 4480 | 324.77 | 603.05 | 494.02 | 179.36 | 79.49  |
| 4482 | 324.82 | 603.25 | 494.86 | 180.75 | 79.79  |
| 4484 | 324.91 | 603.5  | 495.73 | 182.22 | 80.12  |
| 4486 | 324.97 | 603.71 | 496.59 | 183.63 | 80.41  |
| 4488 | 325.03 | 603.98 | 497.59 | 185.31 | 80.75  |
| 4490 | 325.06 | 604.19 | 498.42 | 186.75 | 81.19  |
| 4492 | 325.13 | 604.43 | 499.28 | 188.22 | 81.63  |
| 4494 | 325.2  | 604.7  | 500.15 | 189.69 | 82.09  |
| 4496 | 325.27 | 604.94 | 501.13 | 191.16 | 82.58  |
| 4498 | 325.28 | 605.13 | 501.93 | 192.81 | 83.11  |
| 4500 | 325.33 | 605.35 | 502.77 | 194.3  | 83.64  |
| 4502 | 325.4  | 605.62 | 503.6  | 195.77 | 84.19  |
| 4504 | 325.46 | 605.87 | 504.58 | 197.49 | 84.76  |
| 4506 | 325.52 | 606.11 | 505.41 | 199    | 85.46  |
| 4508 | 325.56 | 606.32 | 506.21 | 200.5  | 86.05  |
| 4510 | 325.61 | 606.54 | 507.02 | 201.99 | 86.69  |
| 4512 | 325.65 | 606.8  | 507.98 | 203.47 | 87.34  |
| 4514 | 325.65 | 606.97 | 508.73 | 205.18 | 87.94  |
| 4516 | 325.69 | 607.19 | 509.54 | 206.7  | 88.75  |
| 4518 | 325.76 | 607.47 | 510.35 | 208.21 | 89.44  |
| 4520 | 325.81 | 607.7  | 511.28 | 209.96 | 90.14  |
| 4522 | 325.85 | 607.92 | 512.08 | 211.5  | 91.02  |
| 4524 | 325.87 | 608.11 | 512.84 | 213.03 | 91.78  |
| 4526 | 325.91 | 608.33 | 513.64 | 214.55 | 92.56  |
| 4528 | 325.96 | 608.58 | 514.43 | 216.1  | 93.38  |
| 4530 | 325.96 | 608.77 | 515.3  | 217.84 | 94.34  |
| 4532 | 326.01 | 609.02 | 516.11 | 219.41 | 95.28  |
| 4534 | 326.06 | 609.26 | 516.9  | 220.97 | 96.23  |
| 4536 | 326.08 | 609.48 | 517.66 | 222.5  | 97.22  |
| 4538 | 326.11 | 609.73 | 518.57 | 224.31 | 98.23  |
| 4540 | 326.14 | 609.95 | 519.33 | 225.89 | 99.46  |
| 4542 | 326.17 | 610.17 | 520.08 | 227.44 | 100.56 |
| 4544 | 326.19 | 610.41 | 520.94 | 229.25 | 101.67 |
| 4546 | 326.22 | 610.63 | 521.71 | 230.82 | 103.06 |
| 4548 | 326.22 | 610.83 | 522.44 | 232.38 | 104.25 |
| 4550 | 326.23 | 611.04 | 523.17 | 233.93 | 105.47 |
| 4552 | 326.27 | 611.31 | 523.93 | 235.54 | 106.76 |
| 4554 | 326.25 | 611.49 | 524.77 | 237.09 | 107.99 |
| 4556 | 326.25 | 611.69 | 525.48 | 238.92 | 109.5  |
| 4558 | 326.28 | 611.92 | 526.21 | 240.52 | 110.88 |
| 4560 | 326.29 | 612.16 | 526.93 | 242.11 | 112.25 |
| 4562 | 326.28 | 612.36 | 527.77 | 243.96 | 113.67 |
| 4564 | 326.26 | 612.55 | 528.47 | 245.54 | 115.35 |
| 4566 | 326.29 | 612.79 | 529.21 | 247.17 | 116.84 |

|      |        |        |        |        |        |
|------|--------|--------|--------|--------|--------|
| 4568 | 326.32 | 613.03 | 529.95 | 248.81 | 118.37 |
| 4570 | 326.32 | 613.28 | 530.78 | 250.42 | 119.89 |
| 4572 | 326.32 | 613.51 | 531.51 | 252.35 | 121.72 |
| 4574 | 326.31 | 613.71 | 532.19 | 253.95 | 123.25 |
| 4576 | 326.31 | 613.97 | 533    | 255.6  | 124.85 |
| 4578 | 326.32 | 614.21 | 533.72 | 257.53 | 126.73 |
| 4580 | 326.28 | 614.41 | 534.41 | 259.17 | 128.34 |
| 4582 | 326.3  | 614.66 | 535.14 | 260.86 | 130.02 |
| 4584 | 326.3  | 614.93 | 535.85 | 262.54 | 131.7  |
| 4586 | 326.28 | 615.17 | 536.55 | 264.21 | 133.37 |
| 4588 | 326.25 | 615.37 | 537.32 | 266.15 | 135.03 |
| 4590 | 326.23 | 615.6  | 538.01 | 267.84 | 137    |
| 4592 | 326.2  | 615.87 | 538.71 | 269.54 | 138.67 |
| 4594 | 326.17 | 616.1  | 539.49 | 271.24 | 140.33 |
| 4596 | 326.14 | 616.32 | 540.16 | 273.24 | 142.29 |
| 4598 | 326.08 | 616.54 | 540.82 | 274.95 | 143.93 |
| 4600 | 326.02 | 616.72 | 541.45 | 276.62 | 145.55 |
| 4602 | 326    | 617    | 542.26 | 278.68 | 147.24 |
| 4604 | 325.96 | 617.22 | 542.92 | 280.43 | 149.16 |
| 4606 | 325.94 | 617.44 | 543.58 | 282.17 | 150.79 |
| 4608 | 325.9  | 617.66 | 544.25 | 283.96 | 152.44 |
| 4610 | 325.87 | 617.91 | 545.02 | 285.72 | 154.1  |
| 4612 | 325.8  | 618.11 | 545.65 | 287.78 | 155.72 |
| 4614 | 325.74 | 618.33 | 546.28 | 289.55 | 157.62 |
| 4616 | 325.68 | 618.52 | 546.91 | 291.31 | 159.24 |
| 4618 | 325.61 | 618.75 | 547.64 | 293.08 | 160.85 |
| 4620 | 325.56 | 618.98 | 548.28 | 295.19 | 162.72 |
| 4622 | 325.49 | 619.16 | 548.9  | 297    | 164.32 |
| 4624 | 325.47 | 619.39 | 549.54 | 298.8  | 165.91 |
| 4626 | 325.41 | 619.65 | 550.18 | 300.63 | 167.5  |
| 4628 | 325.32 | 619.85 | 550.87 | 302.72 | 169.3  |
| 4630 | 325.27 | 620.07 | 551.48 | 304.54 | 170.85 |
| 4632 | 325.24 | 620.33 | 552.14 | 306.38 | 172.45 |
| 4634 | 325.18 | 620.6  | 552.86 | 308.21 | 174    |
| 4636 | 325.1  | 620.8  | 553.45 | 310.3  | 175.5  |
| 4638 | 325.05 | 621.02 | 554.06 | 312.14 | 177.3  |
| 4640 | 325.01 | 621.28 | 554.67 | 313.99 | 178.84 |
| 4642 | 324.92 | 621.47 | 555.25 | 315.79 | 180.33 |
| 4644 | 324.85 | 621.74 | 555.95 | 317.89 | 182.09 |
| 4646 | 324.82 | 621.98 | 556.56 | 319.72 | 183.61 |
| 4648 | 324.73 | 622.2  | 557.13 | 321.53 | 185.08 |
| 4650 | 324.64 | 622.41 | 557.69 | 323.31 | 186.54 |
| 4652 | 324.55 | 622.68 | 558.36 | 325.09 | 188    |
| 4654 | 324.48 | 622.91 | 558.93 | 327.21 | 189.71 |



|      |        |        |        |        |        |
|------|--------|--------|--------|--------|--------|
| 4656 | 324.44 | 623.16 | 559.51 | 329.02 | 191.17 |
| 4658 | 324.37 | 623.47 | 560.11 | 330.85 | 192.63 |
| 4660 | 324.3  | 623.68 | 560.75 | 332.92 | 194.07 |
| 4662 | 324.23 | 623.93 | 561.31 | 334.7  | 195.71 |
| 4664 | 324.14 | 624.14 | 561.85 | 336.48 | 197.13 |
| 4666 | 324.09 | 624.4  | 562.43 | 338.31 | 198.56 |
| 4668 | 324.01 | 624.66 | 562.97 | 340.1  | 199.99 |
| 4670 | 323.95 | 624.9  | 563.62 | 342.18 | 201.68 |
| 4672 | 323.86 | 625.13 | 564.16 | 343.95 | 203.07 |
| 4674 | 323.79 | 625.37 | 564.7  | 345.72 | 204.49 |
| 4676 | 323.73 | 625.69 | 565.36 | 347.53 | 205.93 |
| 4678 | 323.65 | 625.93 | 565.91 | 349.63 | 207.34 |
| 4680 | 323.57 | 626.16 | 566.43 | 351.38 | 208.96 |
| 4682 | 323.48 | 626.4  | 566.96 | 353.15 | 210.35 |
| 4684 | 323.42 | 626.7  | 567.59 | 354.92 | 211.75 |
| 4686 | 323.31 | 626.92 | 568.1  | 356.96 | 213.34 |
| 4688 | 323.23 | 627.14 | 568.63 | 358.72 | 214.69 |
| 4690 | 323.17 | 627.41 | 569.17 | 360.52 | 216.06 |
| 4692 | 323.07 | 627.68 | 569.71 | 362.29 | 217.42 |
| 4694 | 323.02 | 627.95 | 570.33 | 364.35 | 218.79 |
| 4696 | 322.91 | 628.18 | 570.83 | 366.08 | 220.37 |
| 4698 | 322.82 | 628.4  | 571.33 | 367.82 | 221.71 |
| 4700 | 322.7  | 628.67 | 571.92 | 369.55 | 223.03 |
| 4702 | 322.6  | 628.88 | 572.41 | 371.57 | 224.38 |
| 4704 | 322.54 | 629.12 | 572.93 | 373.35 | 225.97 |
| 4706 | 322.43 | 629.33 | 573.4  | 375.06 | 227.27 |
| 4708 | 322.33 | 629.55 | 573.94 | 376.8  | 228.62 |
| 4710 | 322.25 | 629.82 | 574.53 | 378.54 | 229.96 |
| 4712 | 322.17 | 630.04 | 575.04 | 380.57 | 231.53 |
| 4714 | 322.06 | 630.23 | 575.51 | 382.28 | 232.83 |
| 4716 | 321.9  | 630.45 | 575.98 | 383.97 | 234.12 |
| 4718 | 321.8  | 630.68 | 576.56 | 385.97 | 235.44 |
| 4720 | 321.68 | 630.88 | 577.04 | 387.66 | 236.95 |
| 4722 | 321.58 | 631.1  | 577.52 | 389.37 | 238.25 |
| 4724 | 321.52 | 631.37 | 578.06 | 391.13 | 239.58 |
| 4726 | 321.36 | 631.59 | 578.6  | 393.08 | 240.83 |
| 4728 | 321.26 | 631.81 | 579.08 | 394.78 | 242.31 |
| 4730 | 321.18 | 632.07 | 579.59 | 396.51 | 243.6  |
| 4732 | 321.05 | 632.29 | 580.06 | 398.17 | 244.84 |
| 4734 | 320.91 | 632.48 | 580.5  | 399.81 | 246.04 |
| 4736 | 320.79 | 632.76 | 581.09 | 401.78 | 247.31 |
| 4738 | 320.68 | 632.99 | 581.56 | 403.48 | 248.73 |
| 4740 | 320.5  | 633.23 | 582    | 405.11 | 249.92 |
| 4742 | 320.38 | 633.47 | 582.55 | 406.77 | 251.11 |

|      |        |        |        |        |        |
|------|--------|--------|--------|--------|--------|
| 4744 | 320.3  | 633.73 | 583.05 | 408.75 | 252.54 |
| 4746 | 320.19 | 633.97 | 583.51 | 410.42 | 253.71 |
| 4748 | 320.07 | 634.24 | 583.95 | 412.07 | 254.87 |
| 4750 | 319.96 | 634.43 | 584.43 | 413.72 | 256.02 |
| 4752 | 319.85 | 634.7  | 584.96 | 415.36 | 257.14 |
| 4754 | 319.75 | 634.93 | 585.41 | 417.27 | 258.48 |
| 4756 | 319.64 | 635.16 | 585.88 | 418.92 | 259.63 |
| 4758 | 319.55 | 635.45 | 586.43 | 420.6  | 260.77 |
| 4760 | 319.44 | 635.67 | 586.87 | 422.5  | 261.88 |
| 4762 | 319.34 | 635.9  | 587.32 | 424.12 | 263.16 |
| 4764 | 319.23 | 636.14 | 587.78 | 425.74 | 264.26 |
| 4766 | 319.1  | 636.42 | 588.22 | 427.35 | 265.37 |
| 4768 | 318.96 | 636.62 | 588.7  | 429.21 | 266.59 |
| 4770 | 318.87 | 636.88 | 589.17 | 430.84 | 267.68 |
| 4772 | 318.76 | 637.14 | 589.63 | 432.45 | 268.74 |
| 4774 | 318.61 | 637.39 | 590.02 | 434    | 269.72 |
| 4776 | 318.55 | 637.67 | 590.58 | 435.9  | 270.78 |
| 4778 | 318.44 | 637.93 | 591.03 | 437.5  | 271.98 |
| 4780 | 318.34 | 638.17 | 591.47 | 439.08 | 272.98 |
| 4782 | 318.18 | 638.42 | 591.96 | 440.64 | 273.94 |
| 4784 | 318.12 | 638.69 | 592.42 | 442.53 | 275.11 |
| 4786 | 318.02 | 638.95 | 592.87 | 444.13 | 276.1  |
| 4788 | 317.92 | 639.2  | 593.31 | 445.69 | 277.06 |
| 4790 | 317.79 | 639.45 | 593.76 | 447.25 | 278.03 |
| 4792 | 317.65 | 639.71 | 594.23 | 448.78 | 278.96 |
| 4794 | 317.53 | 639.96 | 594.66 | 450.6  | 280.1  |
| 4796 | 317.43 | 640.21 | 595.09 | 452.16 | 281.07 |
| 4798 | 317.32 | 640.51 | 595.55 | 453.74 | 282.01 |
| 4800 | 317.2  | 640.75 | 596.05 | 455.3  | 282.95 |
| 4802 | 317.12 | 641.03 | 596.5  | 457.12 | 284.07 |
| 4804 | 317    | 641.26 | 596.92 | 458.66 | 285    |
| 4806 | 316.91 | 641.54 | 597.38 | 460.24 | 285.96 |
| 4808 | 316.81 | 641.83 | 597.84 | 461.79 | 286.9  |
| 4810 | 316.7  | 642.08 | 598.33 | 463.56 | 287.97 |
| 4812 | 316.59 | 642.32 | 598.75 | 465.08 | 288.86 |
| 4814 | 316.51 | 642.58 | 599.21 | 466.66 | 289.76 |
| 4816 | 316.41 | 642.88 | 599.73 | 468.45 | 290.65 |
| 4818 | 316.32 | 643.14 | 600.17 | 470    | 291.72 |
| 4820 | 316.23 | 643.39 | 600.59 | 471.52 | 292.61 |
| 4822 | 316.12 | 643.65 | 601.04 | 473.04 | 293.52 |
| 4824 | 316.01 | 643.95 | 601.47 | 474.56 | 294.42 |
| 4826 | 315.93 | 644.2  | 602    | 476.35 | 295.29 |
| 4828 | 315.81 | 644.44 | 602.42 | 477.88 | 296.29 |
| 4830 | 315.73 | 644.7  | 602.87 | 479.4  | 297.15 |

|      |        |        |        |        |        |
|------|--------|--------|--------|--------|--------|
| 4832 | 315.6  | 644.98 | 603.37 | 480.93 | 297.97 |
| 4834 | 315.49 | 645.21 | 603.8  | 482.68 | 298.92 |
| 4836 | 315.4  | 645.49 | 604.25 | 484.21 | 299.74 |
| 4838 | 315.31 | 645.76 | 604.69 | 485.72 | 300.55 |
| 4840 | 315.19 | 646.06 | 605.21 | 487.48 | 301.37 |
| 4842 | 315.05 | 646.3  | 605.63 | 488.98 | 302.27 |
| 4844 | 314.95 | 646.54 | 606.06 | 490.5  | 303.07 |
| 4846 | 314.85 | 646.8  | 606.5  | 492.02 | 303.88 |
| 4848 | 314.75 | 647.09 | 607.02 | 493.56 | 304.69 |
| 4850 | 314.67 | 647.36 | 607.49 | 495.33 | 305.54 |
| 4852 | 314.55 | 647.6  | 607.93 | 496.84 | 306.47 |
| 4854 | 314.45 | 647.84 | 608.37 | 498.34 | 307.31 |
| 4856 | 314.33 | 648.08 | 608.81 | 499.85 | 308.14 |
| 4858 | 314.23 | 648.35 | 609.33 | 501.61 | 308.94 |
| 4860 | 314.14 | 648.6  | 609.8  | 503.16 | 309.86 |
| 4862 | 314.04 | 648.82 | 610.23 | 504.65 | 310.63 |
| 4864 | 313.93 | 649.07 | 610.68 | 506.15 | 311.42 |
| 4866 | 313.83 | 649.35 | 611.21 | 507.89 | 312.32 |
| 4868 | 313.74 | 649.59 | 611.65 | 509.38 | 313.08 |
| 4870 | 313.62 | 649.8  | 612.08 | 510.86 | 313.8  |
| 4872 | 313.49 | 650.05 | 612.5  | 512.32 | 314.51 |
| 4874 | 313.4  | 650.27 | 613.01 | 514.07 | 315.21 |
| 4876 | 313.35 | 650.52 | 613.49 | 515.59 | 316.09 |
| 4878 | 313.24 | 650.72 | 613.93 | 517.07 | 316.77 |
| 4880 | 313.16 | 650.95 | 614.4  | 518.59 | 317.48 |
| 4882 | 313.07 | 651.2  | 614.91 | 520.07 | 318.16 |
| 4884 | 312.98 | 651.4  | 615.34 | 521.78 | 318.91 |
| 4886 | 312.88 | 651.6  | 615.79 | 523.24 | 319.53 |
| 4888 | 312.77 | 651.83 | 616.23 | 524.69 | 320.14 |
| 4890 | 312.68 | 652.02 | 616.76 | 526.16 | 320.77 |
| 4892 | 312.6  | 652.22 | 617.2  | 527.89 | 321.45 |
| 4894 | 312.52 | 652.4  | 617.64 | 529.33 | 322.01 |
| 4896 | 312.41 | 652.56 | 618.05 | 530.76 | 322.56 |
| 4898 | 312.31 | 652.77 | 618.56 | 532.42 | 323.12 |
| 4900 | 312.21 | 652.94 | 618.98 | 533.81 | 323.74 |
| 4902 | 312.1  | 653.1  | 619.4  | 535.21 | 324.24 |
| 4904 | 311.98 | 653.26 | 619.81 | 536.6  | 324.72 |
| 4906 | 311.88 | 653.43 | 620.22 | 537.97 | 325.2  |
| 4908 | 311.8  | 653.6  | 620.73 | 539.58 | 325.69 |
| 4910 | 311.73 | 653.76 | 621.16 | 540.95 | 326.25 |
| 4912 | 311.64 | 653.92 | 621.58 | 542.32 | 326.74 |
| 4914 | 311.57 | 654.1  | 622.08 | 543.65 | 327.24 |
| 4916 | 311.45 | 654.22 | 622.47 | 545.15 | 327.69 |
| 4918 | 311.37 | 654.38 | 622.92 | 546.46 | 328.27 |

|      |        |        |        |        |        |
|------|--------|--------|--------|--------|--------|
| 4920 | 311.32 | 654.56 | 623.37 | 547.76 | 328.75 |
| 4922 | 311.18 | 654.65 | 623.75 | 549.01 | 329.17 |
| 4924 | 311.14 | 654.86 | 624.27 | 550.51 | 329.75 |
| 4926 | 311.05 | 655    | 624.68 | 551.73 | 330.21 |
| 4928 | 310.96 | 655.15 | 625.08 | 552.94 | 330.66 |
| 4930 | 310.82 | 655.24 | 625.45 | 554.06 | 331.09 |
| 4932 | 310.74 | 655.41 | 625.94 | 555.23 | 331.56 |
| 4934 | 310.62 | 655.53 | 626.32 | 556.54 | 332.08 |
| 4936 | 310.54 | 655.67 | 626.71 | 557.69 | 332.53 |
| 4938 | 310.46 | 655.82 | 627.13 | 558.79 | 332.98 |
| 4940 | 310.34 | 655.95 | 627.51 | 559.84 | 333.39 |
| 4942 | 310.25 | 656.08 | 627.98 | 561.1  | 333.9  |
| 4944 | 310.15 | 656.19 | 628.36 | 562.16 | 334.34 |
| 4946 | 310.07 | 656.33 | 628.77 | 563.21 | 334.82 |
| 4948 | 309.97 | 656.47 | 629.16 | 564.24 | 335.25 |
| 4950 | 309.88 | 656.6  | 629.6  | 565.42 | 335.64 |
| 4952 | 309.79 | 656.73 | 629.98 | 566.43 | 336.06 |
| 4954 | 309.71 | 656.9  | 630.38 | 567.44 | 336.43 |
| 4956 | 309.63 | 657.04 | 630.83 | 568.45 | 336.81 |
| 4958 | 309.53 | 657.16 | 631.22 | 569.6  | 337.25 |
| 4960 | 309.45 | 657.29 | 631.62 | 570.59 | 337.61 |
| 4962 | 309.37 | 657.42 | 631.98 | 571.54 | 337.94 |
| 4964 | 309.24 | 657.53 | 632.36 | 572.51 | 338.3  |
| 4966 | 309.18 | 657.72 | 632.81 | 573.51 | 338.7  |
| 4968 | 309.1  | 657.87 | 633.2  | 574.61 | 339.14 |
| 4970 | 309.02 | 658.02 | 633.58 | 575.56 | 339.51 |
| 4972 | 308.91 | 658.17 | 633.95 | 576.51 | 339.89 |
| 4974 | 308.82 | 658.32 | 634.38 | 577.44 | 340.26 |
| 4976 | 308.73 | 658.46 | 634.75 | 578.51 | 340.69 |
| 4978 | 308.62 | 658.57 | 635.09 | 579.39 | 341.01 |
| 4980 | 308.48 | 658.69 | 635.41 | 580.26 | 341.3  |
| 4982 | 308.41 | 658.86 | 635.86 | 581.37 | 341.63 |
| 4984 | 308.36 | 659.01 | 636.24 | 582.27 | 342.02 |
| 4986 | 308.24 | 659.1  | 636.57 | 583.11 | 342.3  |
| 4988 | 308.14 | 659.23 | 636.94 | 583.98 | 342.6  |
| 4990 | 308.06 | 659.38 | 637.31 | 584.88 | 342.91 |
| 4992 | 307.98 | 659.51 | 637.74 | 585.87 | 343.18 |
| 4994 | 307.89 | 659.63 | 638.09 | 586.7  | 343.45 |
| 4996 | 307.78 | 659.74 | 638.43 | 587.55 | 343.64 |
| 4998 | 307.7  | 659.88 | 638.85 | 588.4  | 343.83 |
| 5000 | 307.59 | 659.98 | 639.17 | 589.33 | 344    |
| 5002 | 307.5  | 660.09 | 639.54 | 590.16 | 344.21 |
| 5004 | 307.38 | 660.17 | 639.88 | 590.96 | 344.37 |
| 5006 | 307.28 | 660.29 | 640.23 | 591.78 | 344.55 |

|      |        |        |        |        |        |
|------|--------|--------|--------|--------|--------|
| 5008 | 307.19 | 660.39 | 640.65 | 592.58 | 344.72 |
| 5010 | 307.09 | 660.49 | 641    | 593.53 | 344.92 |
| 5012 | 306.97 | 660.59 | 641.35 | 594.32 | 345.08 |
| 5014 | 306.88 | 660.7  | 641.69 | 595.1  | 345.22 |
| 5016 | 306.78 | 660.78 | 642.1  | 595.91 | 345.38 |
| 5018 | 306.68 | 660.87 | 642.43 | 596.79 | 345.58 |
| 5020 | 306.58 | 660.96 | 642.79 | 597.56 | 345.75 |
| 5022 | 306.48 | 661.06 | 643.15 | 598.34 | 345.89 |
| 5024 | 306.38 | 661.17 | 643.55 | 599.24 | 346.05 |
| 5026 | 306.27 | 661.27 | 643.89 | 600    | 346.26 |
| 5028 | 306.16 | 661.36 | 644.24 | 600.74 | 346.43 |
| 5030 | 306.03 | 661.45 | 644.58 | 601.49 | 346.6  |
| 5032 | 305.93 | 661.55 | 644.96 | 602.24 | 346.78 |
| 5034 | 305.8  | 661.61 | 645.27 | 603.09 | 346.93 |
| 5036 | 305.71 | 661.71 | 645.64 | 603.73 | 347.12 |
| 5038 | 305.62 | 661.84 | 646.01 | 604.63 | 347.34 |
| 5040 | 305.52 | 661.92 | 646.42 | 605.4  | 347.51 |
| 5042 | 305.41 | 661.99 | 646.76 | 606.26 | 347.69 |
| 5044 | 305.31 | 662.06 | 647.11 | 607.02 | 347.9  |
| 5046 | 305.22 | 662.13 | 647.46 | 607.8  | 348.08 |
| 5048 | 305.09 | 662.17 | 647.77 | 608.53 | 348.24 |
| 5050 | 304.98 | 662.24 | 648.17 | 609.42 | 348.44 |
| 5052 | 304.9  | 662.32 | 648.53 | 610.2  | 348.64 |
| 5054 | 304.75 | 662.34 | 648.83 | 610.91 | 348.77 |
| 5056 | 304.63 | 662.41 | 649.15 | 611.65 | 348.93 |
| 5058 | 304.53 | 662.47 | 649.57 | 612.55 | 349.1  |
| 5060 | 304.48 | 662.56 | 649.95 | 613.37 | 349.35 |
| 5062 | 304.38 | 662.61 | 650.27 | 614.12 | 349.51 |
| 5064 | 304.25 | 662.65 | 650.6  | 614.87 | 349.68 |
| 5066 | 304.18 | 662.73 | 651.02 | 615.79 | 349.91 |
| 5068 | 304.07 | 662.79 | 651.36 | 616.56 | 350.1  |
| 5070 | 303.97 | 662.84 | 651.7  | 617.34 | 350.27 |
| 5072 | 303.85 | 662.88 | 652.03 | 618.11 | 350.44 |
| 5074 | 303.73 | 662.93 | 652.4  | 618.85 | 350.63 |
| 5076 | 303.64 | 662.99 | 652.73 | 619.75 | 350.88 |
| 5078 | 303.52 | 663.01 | 653.03 | 620.51 | 351.02 |
| 5080 | 303.41 | 663.07 | 653.37 | 621.3  | 351.22 |
| 5082 | 303.29 | 663.1  | 653.73 | 622.17 | 351.4  |
| 5084 | 303.19 | 663.15 | 654.07 | 622.96 | 351.62 |
| 5086 | 303.09 | 663.2  | 654.39 | 623.72 | 351.78 |
| 5088 | 303.02 | 663.27 | 654.74 | 624.52 | 351.99 |
| 5090 | 302.92 | 663.32 | 655.06 | 625.31 | 352.18 |
| 5092 | 302.84 | 663.36 | 655.44 | 626.23 | 352.44 |
| 5094 | 302.74 | 663.4  | 655.76 | 627.01 | 352.63 |

|      |        |        |        |        |        |
|------|--------|--------|--------|--------|--------|
| 5096 | 302.63 | 663.43 | 656.07 | 627.79 | 352.82 |
| 5098 | 302.54 | 663.46 | 656.38 | 628.57 | 353    |
| 5100 | 302.45 | 663.49 | 656.74 | 629.48 | 353.18 |
| 5102 | 302.33 | 663.49 | 657.02 | 630.22 | 353.35 |
| 5104 | 302.23 | 663.54 | 657.35 | 631.02 | 353.56 |
| 5106 | 302.09 | 663.51 | 657.64 | 631.77 | 353.72 |
| 5108 | 302.03 | 663.58 | 657.98 | 632.7  | 354.01 |
| 5110 | 301.93 | 663.59 | 658.28 | 633.47 | 354.2  |
| 5112 | 301.87 | 663.62 | 658.58 | 634.28 | 354.39 |
| 5114 | 301.75 | 663.63 | 658.88 | 635.06 | 354.55 |
| 5116 | 301.65 | 663.64 | 659.21 | 635.8  | 354.74 |
| 5118 | 301.55 | 663.66 | 659.5  | 636.71 | 354.96 |
| 5120 | 301.46 | 663.67 | 659.79 | 637.49 | 355.15 |
| 5122 | 301.35 | 663.67 | 660.11 | 638.26 | 355.36 |
| 5124 | 301.25 | 663.68 | 660.39 | 639.01 | 355.57 |
| 5126 | 301.16 | 663.7  | 660.67 | 639.9  | 355.83 |
| 5128 | 301.07 | 663.71 | 660.96 | 640.68 | 356.01 |
| 5130 | 300.95 | 663.7  | 661.22 | 641.41 | 356.22 |
| 5132 | 300.84 | 663.71 | 661.48 | 642.15 | 356.41 |
| 5134 | 300.74 | 663.71 | 661.79 | 643    | 356.62 |
| 5136 | 300.66 | 663.73 | 662.06 | 643.74 | 356.9  |
| 5138 | 300.54 | 663.72 | 662.32 | 644.49 | 357.15 |
| 5140 | 300.46 | 663.75 | 662.64 | 645.22 | 357.43 |
| 5142 | 300.37 | 663.75 | 662.85 | 645.95 | 357.73 |
| 5144 | 300.25 | 663.72 | 663.14 | 646.79 | 358.06 |
| 5146 | 300.17 | 663.74 | 663.4  | 647.53 | 358.35 |
| 5148 | 300.04 | 663.72 | 663.69 | 648.34 | 358.6  |
| 5150 | 299.9  | 663.68 | 663.91 | 649.02 | 358.87 |
| 5152 | 299.84 | 663.71 | 664.19 | 649.77 | 359.2  |
| 5154 | 299.76 | 663.71 | 664.45 | 650.51 | 359.48 |
| 5156 | 299.66 | 663.71 | 664.71 | 651.25 | 359.75 |
| 5158 | 299.55 | 663.68 | 665    | 651.98 | 360.04 |
| 5160 | 299.47 | 663.67 | 665.24 | 652.8  | 360.36 |
| 5162 | 299.36 | 663.65 | 665.48 | 653.5  | 360.63 |
| 5164 | 299.26 | 663.61 | 665.75 | 654.19 | 360.88 |
| 5166 | 299.16 | 663.59 | 666    | 655.02 | 361.12 |
| 5168 | 299.05 | 663.57 | 666.24 | 655.73 | 361.4  |
| 5170 | 298.96 | 663.55 | 666.5  | 656.47 | 361.62 |
| 5172 | 298.91 | 663.56 | 666.77 | 657.21 | 361.85 |
| 5174 | 298.82 | 663.53 | 667.05 | 657.89 | 362.04 |
| 5176 | 298.68 | 663.45 | 667.24 | 658.68 | 362.24 |
| 5178 | 298.58 | 663.41 | 667.48 | 659.38 | 362.44 |
| 5180 | 298.49 | 663.38 | 667.73 | 660.09 | 362.63 |
| 5182 | 298.39 | 663.33 | 668    | 660.91 | 362.79 |

|      |        |        |        |        |        |
|------|--------|--------|--------|--------|--------|
| 5184 | 298.3  | 663.29 | 668.22 | 661.6  | 363    |
| 5186 | 298.22 | 663.27 | 668.48 | 662.29 | 363.2  |
| 5188 | 298.11 | 663.22 | 668.7  | 662.98 | 363.38 |
| 5190 | 298.02 | 663.17 | 668.97 | 663.76 | 363.55 |
| 5192 | 297.93 | 663.12 | 669.19 | 664.44 | 363.71 |
| 5194 | 297.83 | 663.07 | 669.42 | 665.1  | 363.9  |
| 5196 | 297.73 | 663.03 | 669.65 | 665.76 | 364.07 |
| 5198 | 297.65 | 662.97 | 669.9  | 666.42 | 364.21 |
| 5200 | 297.56 | 662.94 | 670.13 | 667.19 | 364.43 |
| 5202 | 297.5  | 662.92 | 670.39 | 667.88 | 364.61 |
| 5204 | 297.4  | 662.86 | 670.6  | 668.51 | 364.74 |
| 5206 | 297.29 | 662.83 | 670.84 | 669.13 | 364.87 |
| 5208 | 297.21 | 662.79 | 671.13 | 669.85 | 365.01 |
| 5210 | 297.14 | 662.77 | 671.38 | 670.49 | 365.21 |
| 5212 | 297.09 | 662.76 | 671.63 | 671.12 | 365.37 |
| 5214 | 296.98 | 662.74 | 671.87 | 671.72 | 365.52 |
| 5216 | 296.89 | 662.7  | 672.14 | 672.42 | 365.69 |
| 5218 | 296.81 | 662.67 | 672.37 | 673.02 | 365.84 |
| 5220 | 296.69 | 662.61 | 672.59 | 673.6  | 365.95 |
| 5222 | 296.61 | 662.61 | 672.85 | 674.2  | 366.11 |
| 5224 | 296.53 | 662.57 | 673.11 | 674.88 | 366.25 |
| 5226 | 296.43 | 662.55 | 673.34 | 675.45 | 366.41 |
| 5228 | 296.35 | 662.52 | 673.58 | 676.05 | 366.56 |
| 5230 | 296.26 | 662.49 | 673.82 | 676.63 | 366.66 |
| 5232 | 296.17 | 662.45 | 674.06 | 677.23 | 366.72 |
| 5234 | 296.09 | 662.42 | 674.34 | 677.92 | 366.79 |
| 5236 | 296.01 | 662.39 | 674.58 | 678.48 | 366.87 |
| 5238 | 295.88 | 662.33 | 674.8  | 679.01 | 366.94 |
| 5240 | 295.78 | 662.28 | 675.02 | 679.54 | 367    |
| 5242 | 295.74 | 662.29 | 675.34 | 680.24 | 367.12 |
| 5244 | 295.67 | 662.26 | 675.59 | 680.78 | 367.19 |
| 5246 | 295.58 | 662.24 | 675.83 | 681.3  | 367.25 |
| 5248 | 295.46 | 662.2  | 676.07 | 681.83 | 367.31 |
| 5250 | 295.38 | 662.16 | 676.34 | 682.36 | 367.37 |
| 5252 | 295.32 | 662.16 | 676.6  | 682.98 | 367.49 |
| 5254 | 295.25 | 662.14 | 676.84 | 683.5  | 367.61 |
| 5256 | 295.13 | 662.11 | 677.08 | 683.98 | 367.69 |
| 5258 | 295.07 | 662.11 | 677.38 | 684.58 | 367.8  |
| 5260 | 295.01 | 662.1  | 677.63 | 685.09 | 367.91 |
| 5262 | 294.88 | 662.05 | 677.83 | 685.51 | 367.97 |
| 5264 | 294.78 | 662.02 | 678.06 | 685.98 | 368.04 |
| 5266 | 294.75 | 662.07 | 678.4  | 686.58 | 368.16 |
| 5268 | 294.63 | 662.03 | 678.6  | 686.99 | 368.24 |
| 5270 | 294.57 | 662.03 | 678.86 | 687.46 | 368.36 |

|      |        |        |        |        |        |
|------|--------|--------|--------|--------|--------|
| 5272 | 294.52 | 662.05 | 679.13 | 687.96 | 368.52 |
| 5274 | 294.43 | 662.04 | 679.37 | 688.4  | 368.66 |
| 5276 | 294.35 | 662.02 | 679.65 | 688.91 | 368.8  |
| 5278 | 294.22 | 661.97 | 679.84 | 689.31 | 368.92 |
| 5280 | 294.16 | 661.96 | 680.1  | 689.77 | 369.06 |
| 5282 | 294.09 | 661.96 | 680.36 | 690.21 | 369.17 |
| 5284 | 294    | 661.92 | 680.62 | 690.69 | 369.27 |
| 5286 | 293.92 | 661.88 | 680.85 | 691.08 | 369.42 |
| 5288 | 293.84 | 661.85 | 681.09 | 691.5  | 369.56 |
| 5290 | 293.72 | 661.8  | 681.31 | 691.9  | 369.67 |
| 5292 | 293.64 | 661.75 | 681.59 | 692.36 | 369.8  |
| 5294 | 293.52 | 661.67 | 681.79 | 692.73 | 369.93 |
| 5296 | 293.43 | 661.64 | 682.03 | 693.16 | 370.06 |
| 5298 | 293.33 | 661.6  | 682.27 | 693.55 | 370.18 |
| 5300 | 293.25 | 661.56 | 682.55 | 693.96 | 370.33 |
| 5302 | 293.18 | 661.54 | 682.8  | 694.41 | 370.5  |
| 5304 | 293.07 | 661.5  | 683.03 | 694.79 | 370.62 |
| 5306 | 292.99 | 661.46 | 683.33 | 695.18 | 370.77 |
| 5308 | 292.89 | 661.42 | 683.52 | 695.55 | 370.89 |
| 5310 | 292.79 | 661.38 | 683.8  | 695.96 | 371.01 |
| 5312 | 292.7  | 661.31 | 684.02 | 696.32 | 371.11 |
| 5314 | 292.59 | 661.27 | 684.26 | 696.68 | 371.19 |
| 5316 | 292.49 | 661.2  | 684.53 | 697.02 | 371.21 |
| 5318 | 292.39 | 661.13 | 684.76 | 697.42 | 371.25 |
| 5320 | 292.29 | 661.09 | 685.01 | 697.8  | 371.33 |
| 5322 | 292.2  | 661.02 | 685.24 | 698.15 | 371.38 |
| 5324 | 292.08 | 660.93 | 685.5  | 698.49 | 371.43 |
| 5326 | 291.97 | 660.85 | 685.73 | 698.87 | 371.53 |
| 5328 | 291.86 | 660.78 | 685.96 | 699.2  | 371.6  |
| 5330 | 291.75 | 660.71 | 686.19 | 699.51 | 371.68 |
| 5332 | 291.61 | 660.6  | 686.45 | 699.84 | 371.74 |
| 5334 | 291.47 | 660.48 | 686.65 | 700.11 | 371.76 |
| 5336 | 291.33 | 660.38 | 686.87 | 700.44 | 371.78 |
| 5338 | 291.24 | 660.31 | 687.12 | 700.78 | 371.82 |
| 5340 | 291.1  | 660.18 | 687.35 | 701.08 | 371.84 |
| 5342 | 291.01 | 660.11 | 687.64 | 701.42 | 371.88 |
| 5344 | 290.91 | 660    | 687.86 | 701.79 | 371.91 |
| 5346 | 290.76 | 659.88 | 688.06 | 702.07 | 371.9  |
| 5348 | 290.62 | 659.75 | 688.28 | 702.36 | 371.91 |
| 5350 | 290.47 | 659.62 | 688.55 | 702.65 | 371.89 |
| 5352 | 290.4  | 659.55 | 688.83 | 703.04 | 371.91 |
| 5354 | 290.27 | 659.41 | 689.04 | 703.33 | 371.87 |
| 5356 | 290.09 | 659.27 | 689.24 | 703.57 | 371.8  |
| 5358 | 289.97 | 659.13 | 689.47 | 703.86 | 371.76 |



|      |        |        |        |        |        |
|------|--------|--------|--------|--------|--------|
| 5360 | 289.88 | 659.04 | 689.77 | 704.17 | 371.74 |
| 5362 | 289.76 | 658.9  | 689.99 | 704.49 | 371.69 |
| 5364 | 289.63 | 658.77 | 690.21 | 704.77 | 371.65 |
| 5366 | 289.51 | 658.68 | 690.46 | 705.04 | 371.62 |
| 5368 | 289.37 | 658.52 | 690.73 | 705.35 | 371.56 |
| 5370 | 289.25 | 658.4  | 690.96 | 705.61 | 371.48 |
| 5372 | 289.09 | 658.23 | 691.15 | 705.83 | 371.38 |
| 5374 | 288.97 | 658.11 | 691.4  | 706.08 | 371.34 |
| 5376 | 288.86 | 657.98 | 691.68 | 706.41 | 371.31 |
| 5378 | 288.67 | 657.79 | 691.86 | 706.61 | 371.25 |
| 5380 | 288.53 | 657.64 | 692.07 | 706.86 | 371.26 |
| 5382 | 288.37 | 657.48 | 692.31 | 707.09 | 371.26 |
| 5384 | 288.21 | 657.31 | 692.54 | 707.3  | 371.21 |
| 5386 | 288.08 | 657.15 | 692.76 | 707.59 | 371.19 |
| 5388 | 287.97 | 657.02 | 693.01 | 707.86 | 371.22 |
| 5390 | 287.8  | 656.84 | 693.2  | 708.07 | 371.16 |
| 5392 | 287.64 | 656.68 | 693.42 | 708.31 | 371.14 |
| 5394 | 287.48 | 656.48 | 693.68 | 708.62 | 371.09 |
| 5396 | 287.33 | 656.3  | 693.89 | 708.87 | 371.04 |
| 5398 | 287.19 | 656.13 | 694.11 | 709.14 | 370.99 |
| 5400 | 287.07 | 655.97 | 694.37 | 709.44 | 370.95 |
| 5402 | 286.87 | 655.76 | 694.59 | 709.73 | 370.82 |
| 5404 | 286.72 | 655.58 | 694.8  | 709.99 | 370.76 |
| 5406 | 286.57 | 655.42 | 695.05 | 710.3  | 370.73 |
| 5408 | 286.42 | 655.24 | 695.27 | 710.58 | 370.69 |
| 5410 | 286.21 | 654.99 | 695.51 | 710.89 | 370.59 |
| 5412 | 286.1  | 654.85 | 695.78 | 711.22 | 370.56 |
| 5414 | 285.96 | 654.68 | 696.01 | 711.53 | 370.5  |
| 5416 | 285.76 | 654.46 | 696.21 | 711.8  | 370.43 |
| 5418 | 285.63 | 654.26 | 696.45 | 712.11 | 370.36 |
| 5420 | 285.47 | 654.08 | 696.71 | 712.44 | 370.23 |
| 5422 | 285.32 | 653.89 | 696.94 | 712.75 | 370.12 |
| 5424 | 285.14 | 653.71 | 697.18 | 713.06 | 370    |
| 5426 | 284.98 | 653.49 | 697.45 | 713.45 | 369.89 |
| 5428 | 284.82 | 653.29 | 697.67 | 713.76 | 369.74 |
| 5430 | 284.66 | 653.1  | 697.9  | 714.07 | 369.62 |
| 5432 | 284.5  | 652.91 | 698.13 | 714.4  | 369.5  |
| 5434 | 284.3  | 652.69 | 698.34 | 714.74 | 369.38 |
| 5436 | 284.14 | 652.48 | 698.61 | 715.05 | 369.3  |
| 5438 | 283.94 | 652.26 | 698.81 | 715.36 | 369.18 |
| 5440 | 283.76 | 652.06 | 699.03 | 715.67 | 369.13 |
| 5442 | 283.6  | 651.83 | 699.27 | 716.01 | 369.08 |
| 5444 | 283.42 | 651.62 | 699.53 | 716.33 | 369.01 |
| 5446 | 283.23 | 651.41 | 699.74 | 716.6  | 368.88 |

|      |        |        |        |        |        |
|------|--------|--------|--------|--------|--------|
| 5448 | 283.07 | 651.2  | 699.97 | 716.89 | 368.76 |
| 5450 | 282.92 | 651.01 | 700.21 | 717.18 | 368.64 |
| 5452 | 282.74 | 650.79 | 700.49 | 717.53 | 368.49 |
| 5454 | 282.56 | 650.56 | 700.7  | 717.81 | 368.31 |
| 5456 | 282.37 | 650.34 | 700.92 | 718.1  | 368.13 |
| 5458 | 282.16 | 650.12 | 701.12 | 718.38 | 367.94 |
| 5460 | 281.99 | 649.86 | 701.34 | 718.67 | 367.74 |
| 5462 | 281.85 | 649.66 | 701.62 | 719.07 | 367.57 |
| 5464 | 281.71 | 649.47 | 701.86 | 719.41 | 367.37 |
| 5466 | 281.47 | 649.18 | 702.04 | 719.68 | 367.14 |
| 5468 | 281.28 | 648.93 | 702.28 | 719.97 | 366.92 |
| 5470 | 281.11 | 648.72 | 702.49 | 720.33 | 366.65 |
| 5472 | 280.93 | 648.5  | 702.7  | 720.65 | 366.41 |
| 5474 | 280.75 | 648.28 | 702.91 | 720.95 | 366.18 |
| 5476 | 280.51 | 648.01 | 703.11 | 721.23 | 365.97 |
| 5478 | 280.33 | 647.8  | 703.36 | 721.53 | 365.79 |
| 5480 | 280.13 | 647.57 | 703.57 | 721.87 | 365.56 |
| 5482 | 279.97 | 647.38 | 703.8  | 722.18 | 365.38 |
| 5484 | 279.74 | 647.11 | 704    | 722.46 | 365.17 |
| 5486 | 279.54 | 646.88 | 704.25 | 722.79 | 364.98 |
| 5488 | 279.33 | 646.64 | 704.44 | 723.06 | 364.71 |
| 5490 | 279.12 | 646.41 | 704.63 | 723.32 | 364.47 |
| 5492 | 278.86 | 646.13 | 704.83 | 723.56 | 364.22 |
| 5494 | 278.63 | 645.9  | 705.07 | 723.83 | 363.99 |
| 5496 | 278.4  | 645.67 | 705.28 | 724.15 | 363.74 |
| 5498 | 278.14 | 645.45 | 705.48 | 724.44 | 363.46 |
| 5500 | 277.89 | 645.19 | 705.68 | 724.7  | 363.22 |
| 5502 | 277.63 | 644.97 | 705.92 | 724.95 | 362.96 |
| 5504 | 277.39 | 644.76 | 706.13 | 725.28 | 362.67 |
| 5506 | 277.1  | 644.55 | 706.33 | 725.53 | 362.42 |
| 5508 | 276.84 | 644.34 | 706.54 | 725.78 | 362.18 |
| 5510 | 276.5  | 644.09 | 706.78 | 726.01 | 361.92 |
| 5512 | 276.22 | 643.88 | 706.99 | 726.32 | 361.67 |
| 5514 | 275.95 | 643.67 | 707.2  | 726.58 | 361.36 |
| 5516 | 275.65 | 643.46 | 707.41 | 726.82 | 361.08 |
| 5518 | 275.3  | 643.21 | 707.62 | 727.07 | 360.79 |
| 5520 | 275    | 643    | 707.82 | 727.31 | 360.49 |
| 5522 | 274.7  | 642.81 | 708.07 | 727.6  | 360.21 |
| 5524 | 274.39 | 642.6  | 708.28 | 727.83 | 359.85 |
| 5526 | 274.05 | 642.36 | 708.49 | 728.09 | 359.55 |
| 5528 | 273.74 | 642.15 | 708.74 | 728.33 | 359.25 |
| 5530 | 273.43 | 641.94 | 708.95 | 728.59 | 358.93 |
| 5532 | 273.13 | 641.75 | 709.16 | 728.81 | 358.62 |
| 5534 | 272.79 | 641.52 | 709.35 | 729.04 | 358.29 |

|      |        |        |        |        |        |
|------|--------|--------|--------|--------|--------|
| 5536 | 272.44 | 641.3  | 709.6  | 729.34 | 357.96 |
| 5538 | 272.15 | 641.11 | 709.83 | 729.59 | 357.61 |
| 5540 | 271.85 | 640.92 | 710.06 | 729.86 | 357.31 |
| 5542 | 271.54 | 640.7  | 710.26 | 730.06 | 356.97 |
| 5544 | 271.2  | 640.48 | 710.48 | 730.31 | 356.67 |
| 5546 | 270.88 | 640.28 | 710.73 | 730.53 | 356.35 |
| 5548 | 270.59 | 640.08 | 710.94 | 730.8  | 355.98 |
| 5550 | 270.29 | 639.88 | 711.16 | 731.04 | 355.69 |
| 5552 | 269.95 | 639.7  | 711.38 | 731.27 | 355.41 |
| 5554 | 269.63 | 639.45 | 711.61 | 731.49 | 355.1  |
| 5556 | 269.34 | 639.26 | 711.82 | 731.69 | 354.76 |
| 5558 | 269.09 | 639.11 | 712.08 | 731.94 | 354.51 |
| 5560 | 268.73 | 638.91 | 712.27 | 732.12 | 354.16 |
| 5562 | 268.42 | 638.65 | 712.48 | 732.3  | 353.82 |
| 5564 | 268.13 | 638.47 | 712.68 | 732.54 | 353.43 |
| 5566 | 267.81 | 638.25 | 712.85 | 732.72 | 353.09 |
| 5568 | 267.48 | 638.03 | 713.06 | 732.9  | 352.77 |
| 5570 | 267.22 | 637.86 | 713.32 | 733.15 | 352.45 |
| 5572 | 266.93 | 637.67 | 713.53 | 733.3  | 352.07 |
| 5574 | 266.66 | 637.5  | 713.74 | 733.49 | 351.75 |
| 5576 | 266.41 | 637.32 | 713.94 | 733.69 | 351.45 |
| 5578 | 266.1  | 637.11 | 714.15 | 733.84 | 351.11 |
| 5580 | 265.79 | 636.92 | 714.38 | 734.02 | 350.73 |
| 5582 | 265.55 | 636.76 | 714.6  | 734.2  | 350.38 |
| 5584 | 265.25 | 636.59 | 714.79 | 734.38 | 350.04 |
| 5586 | 264.94 | 636.34 | 714.95 | 734.51 | 349.66 |
| 5588 | 264.69 | 636.17 | 715.19 | 734.7  | 349.31 |
| 5590 | 264.44 | 635.98 | 715.38 | 734.85 | 348.91 |
| 5592 | 264.09 | 635.77 | 715.55 | 734.97 | 348.53 |
| 5594 | 263.86 | 635.58 | 715.8  | 735.16 | 348.21 |
| 5596 | 263.6  | 635.38 | 715.98 | 735.31 | 347.84 |
| 5598 | 263.34 | 635.2  | 716.17 | 735.45 | 347.5  |
| 5600 | 263.08 | 634.99 | 716.33 | 735.57 | 347.12 |
| 5602 | 262.78 | 634.76 | 716.49 | 735.69 | 346.73 |
| 5604 | 262.53 | 634.53 | 716.68 | 735.83 | 346.37 |
| 5606 | 262.28 | 634.32 | 716.88 | 735.96 | 345.93 |
| 5608 | 262.04 | 634.12 | 717.05 | 736.08 | 345.57 |
| 5610 | 261.75 | 633.88 | 717.22 | 736.2  | 345.22 |
| 5612 | 261.49 | 633.66 | 717.4  | 736.31 | 344.87 |
| 5614 | 261.28 | 633.5  | 717.6  | 736.44 | 344.5  |
| 5616 | 261.04 | 633.28 | 717.76 | 736.53 | 344.15 |
| 5618 | 260.78 | 633.06 | 717.91 | 736.6  | 343.81 |
| 5620 | 260.52 | 632.85 | 718.08 | 736.69 | 343.5  |
| 5622 | 260.24 | 632.62 | 718.24 | 736.73 | 343.15 |

|      |        |        |        |        |        |
|------|--------|--------|--------|--------|--------|
| 5624 | 260.03 | 632.46 | 718.42 | 736.84 | 342.8  |
| 5626 | 259.78 | 632.28 | 718.6  | 736.92 | 342.5  |
| 5628 | 259.55 | 632.06 | 718.78 | 736.99 | 342.21 |
| 5630 | 259.34 | 631.87 | 718.95 | 737.08 | 341.9  |
| 5632 | 259.12 | 631.68 | 719.11 | 737.14 | 341.53 |
| 5634 | 258.9  | 631.49 | 719.26 | 737.19 | 341.21 |
| 5636 | 258.62 | 631.25 | 719.43 | 737.23 | 340.88 |
| 5638 | 258.41 | 631.08 | 719.6  | 737.3  | 340.49 |
| 5640 | 258.18 | 630.9  | 719.75 | 737.35 | 340.17 |
| 5642 | 257.95 | 630.7  | 719.9  | 737.37 | 339.81 |
| 5644 | 257.72 | 630.54 | 720.07 | 737.44 | 339.47 |
| 5646 | 257.49 | 630.32 | 720.24 | 737.48 | 339.08 |
| 5648 | 257.32 | 630.18 | 720.41 | 737.59 | 338.74 |
| 5650 | 257.09 | 629.97 | 720.53 | 737.61 | 338.27 |
| 5652 | 256.87 | 629.79 | 720.69 | 737.68 | 337.92 |
| 5654 | 256.65 | 629.62 | 720.86 | 737.73 | 337.53 |
| 5656 | 256.45 | 629.45 | 721    | 737.79 | 337.13 |
| 5658 | 256.27 | 629.32 | 721.16 | 737.85 | 336.79 |
| 5660 | 256.06 | 629.16 | 721.3  | 737.87 | 336.45 |
| 5662 | 255.83 | 628.97 | 721.47 | 737.91 | 336.1  |
| 5664 | 255.63 | 628.79 | 721.6  | 737.92 | 335.69 |
| 5666 | 255.38 | 628.59 | 721.69 | 737.89 | 335.31 |
| 5668 | 255.17 | 628.43 | 721.82 | 737.89 | 334.96 |
| 5670 | 254.94 | 628.24 | 721.98 | 737.89 | 334.59 |
| 5672 | 254.76 | 628.09 | 722.13 | 737.9  | 334.26 |
| 5674 | 254.54 | 627.92 | 722.25 | 737.88 | 333.84 |
| 5676 | 254.37 | 627.81 | 722.43 | 737.91 | 333.54 |
| 5678 | 254.17 | 627.64 | 722.54 | 737.87 | 333.21 |
| 5680 | 253.95 | 627.44 | 722.65 | 737.82 | 332.86 |
| 5682 | 253.75 | 627.27 | 722.8  | 737.78 | 332.49 |
| 5684 | 253.56 | 627.13 | 722.94 | 737.75 | 332.19 |
| 5686 | 253.33 | 626.95 | 723.05 | 737.68 | 331.85 |
| 5688 | 253.15 | 626.81 | 723.21 | 737.64 | 331.54 |
| 5690 | 252.98 | 626.67 | 723.34 | 737.6  | 331.17 |
| 5692 | 252.76 | 626.51 | 723.45 | 737.51 | 330.82 |
| 5694 | 252.54 | 626.33 | 723.57 | 737.43 | 330.48 |
| 5696 | 252.36 | 626.18 | 723.71 | 737.36 | 330.13 |
| 5698 | 252.18 | 626.04 | 723.83 | 737.28 | 329.77 |
| 5700 | 252.01 | 625.9  | 723.94 | 737.19 | 329.33 |
| 5702 | 251.8  | 625.75 | 724.07 | 737.11 | 328.95 |
| 5704 | 251.63 | 625.59 | 724.19 | 737.04 | 328.58 |
| 5706 | 251.45 | 625.43 | 724.31 | 736.95 | 328.21 |
| 5708 | 251.27 | 625.3  | 724.44 | 736.85 | 327.78 |
| 5710 | 251.1  | 625.18 | 724.59 | 736.8  | 327.42 |

|      |        |        |        |        |        |
|------|--------|--------|--------|--------|--------|
| 5712 | 250.91 | 625.03 | 724.7  | 736.71 | 327.04 |
| 5714 | 250.77 | 624.94 | 724.87 | 736.66 | 326.69 |
| 5716 | 250.6  | 624.83 | 725    | 736.55 | 326.26 |
| 5718 | 250.43 | 624.68 | 725.09 | 736.44 | 325.87 |
| 5720 | 250.23 | 624.55 | 725.21 | 736.36 | 325.53 |
| 5722 | 250.04 | 624.43 | 725.35 | 736.25 | 325.17 |
| 5724 | 249.89 | 624.33 | 725.48 | 736.17 | 324.8  |
| 5726 | 249.73 | 624.24 | 725.62 | 736.07 | 324.48 |
| 5728 | 249.54 | 624.13 | 725.73 | 735.95 | 324.16 |
| 5730 | 249.35 | 623.98 | 725.86 | 735.8  | 323.84 |
| 5732 | 249.17 | 623.84 | 725.96 | 735.65 | 323.43 |
| 5734 | 249.01 | 623.73 | 726.08 | 735.5  | 323.13 |
| 5736 | 248.78 | 623.58 | 726.16 | 735.31 | 322.79 |
| 5738 | 248.61 | 623.44 | 726.27 | 735.15 | 322.47 |
| 5740 | 248.44 | 623.32 | 726.4  | 734.97 | 322.1  |
| 5742 | 248.29 | 623.19 | 726.51 | 734.8  | 321.8  |
| 5744 | 248.1  | 623.05 | 726.62 | 734.61 | 321.49 |
| 5746 | 247.98 | 622.95 | 726.73 | 734.44 | 321.2  |
| 5748 | 247.73 | 622.74 | 726.8  | 734.15 | 320.82 |
| 5750 | 247.6  | 622.64 | 726.94 | 734.01 | 320.47 |
| 5752 | 247.46 | 622.53 | 727.07 | 733.84 | 320.13 |
| 5754 | 247.29 | 622.38 | 727.19 | 733.64 | 319.8  |
| 5756 | 247.13 | 622.25 | 727.29 | 733.4  | 319.44 |
| 5758 | 247    | 622.14 | 727.41 | 733.21 | 319.14 |
| 5760 | 246.85 | 622.01 | 727.52 | 733    | 318.81 |
| 5762 | 246.67 | 621.88 | 727.64 | 732.82 | 318.48 |
| 5764 | 246.54 | 621.78 | 727.78 | 732.62 | 318.17 |
| 5766 | 246.39 | 621.64 | 727.87 | 732.37 | 317.77 |
| 5768 | 246.17 | 621.49 | 727.94 | 732.12 | 317.4  |
| 5770 | 246.04 | 621.37 | 728.08 | 731.93 | 317.08 |
| 5772 | 245.86 | 621.21 | 728.16 | 731.65 | 316.69 |
| 5774 | 245.75 | 621.12 | 728.29 | 731.46 | 316.34 |
| 5776 | 245.56 | 620.96 | 728.36 | 731.2  | 315.98 |
| 5778 | 245.39 | 620.82 | 728.46 | 730.98 | 315.64 |
| 5780 | 245.27 | 620.7  | 728.61 | 730.76 | 315.36 |
| 5782 | 245.09 | 620.54 | 728.68 | 730.51 | 314.95 |
| 5784 | 244.94 | 620.4  | 728.77 | 730.27 | 314.61 |
| 5786 | 244.79 | 620.29 | 728.89 | 730.07 | 314.32 |
| 5788 | 244.67 | 620.14 | 729    | 729.84 | 314.03 |
| 5790 | 244.47 | 619.97 | 729.09 | 729.53 | 313.64 |
| 5792 | 244.35 | 619.84 | 729.19 | 729.29 | 313.33 |
| 5794 | 244.18 | 619.68 | 729.28 | 729.02 | 312.99 |
| 5796 | 244.05 | 619.54 | 729.42 | 728.78 | 312.66 |
| 5798 | 243.9  | 619.39 | 729.51 | 728.51 | 312.34 |

|      |        |        |        |        |        |
|------|--------|--------|--------|--------|--------|
| 5800 | 243.75 | 619.24 | 729.6  | 728.25 | 311.94 |
| 5802 | 243.62 | 619.1  | 729.69 | 727.99 | 311.6  |
| 5804 | 243.44 | 618.97 | 729.8  | 727.73 | 311.28 |
| 5806 | 243.3  | 618.79 | 729.89 | 727.46 | 310.94 |
| 5808 | 243.12 | 618.61 | 729.96 | 727.12 | 310.52 |
| 5810 | 243.01 | 618.49 | 730.08 | 726.88 | 310.22 |
| 5812 | 242.87 | 618.31 | 730.18 | 726.62 | 309.9  |
| 5814 | 242.73 | 618.16 | 730.28 | 726.29 | 309.58 |
| 5816 | 242.61 | 618.02 | 730.39 | 726.01 | 309.21 |
| 5818 | 242.47 | 617.87 | 730.49 | 725.74 | 308.91 |
| 5820 | 242.33 | 617.69 | 730.58 | 725.46 | 308.58 |
| 5822 | 242.19 | 617.54 | 730.68 | 725.1  | 308.28 |
| 5824 | 242.05 | 617.38 | 730.75 | 724.79 | 307.87 |
| 5826 | 241.95 | 617.24 | 730.86 | 724.52 | 307.56 |
| 5828 | 241.81 | 617.09 | 730.97 | 724.23 | 307.23 |
| 5830 | 241.65 | 616.91 | 731.04 | 723.92 | 306.91 |
| 5832 | 241.51 | 616.75 | 731.14 | 723.61 | 306.57 |
| 5834 | 241.35 | 616.57 | 731.2  | 723.21 | 306.16 |
| 5836 | 241.19 | 616.41 | 731.28 | 722.88 | 305.83 |
| 5838 | 241.11 | 616.27 | 731.41 | 722.6  | 305.57 |
| 5840 | 240.99 | 616.11 | 731.51 | 722.21 | 305.25 |
| 5842 | 240.86 | 615.95 | 731.6  | 721.89 | 304.92 |
| 5844 | 240.74 | 615.8  | 731.69 | 721.56 | 304.63 |
| 5846 | 240.6  | 615.61 | 731.79 | 721.2  | 304.34 |
| 5848 | 240.44 | 615.43 | 731.84 | 720.77 | 303.97 |
| 5850 | 240.34 | 615.27 | 731.93 | 720.48 | 303.74 |
| 5852 | 240.22 | 615.12 | 732.02 | 720.07 | 303.42 |
| 5854 | 240.04 | 614.92 | 732.07 | 719.66 | 303.1  |
| 5856 | 239.93 | 614.74 | 732.18 | 719.32 | 302.84 |
| 5858 | 239.8  | 614.6  | 732.27 | 718.86 | 302.49 |
| 5860 | 239.67 | 614.43 | 732.34 | 718.48 | 302.2  |
| 5862 | 239.53 | 614.26 | 732.43 | 718.11 | 301.94 |
| 5864 | 239.41 | 614.09 | 732.53 | 717.72 | 301.67 |
| 5866 | 239.28 | 613.94 | 732.62 | 717.26 | 301.4  |
| 5868 | 239.15 | 613.78 | 732.7  | 716.86 | 301.08 |
| 5870 | 239.03 | 613.64 | 732.79 | 716.46 | 300.78 |
| 5872 | 238.91 | 613.5  | 732.9  | 716.09 | 300.51 |
| 5874 | 238.84 | 613.36 | 733.02 | 715.71 | 300.23 |
| 5876 | 238.69 | 613.18 | 733.08 | 715.21 | 299.88 |
| 5878 | 238.56 | 613.04 | 733.16 | 714.8  | 299.59 |
| 5880 | 238.44 | 612.88 | 733.25 | 714.4  | 299.31 |
| 5882 | 238.32 | 612.74 | 733.35 | 713.98 | 299.03 |
| 5884 | 238.21 | 612.61 | 733.44 | 713.5  | 298.71 |
| 5886 | 238.08 | 612.46 | 733.51 | 713.07 | 298.42 |

|      |        |        |        |        |        |
|------|--------|--------|--------|--------|--------|
| 5888 | 237.97 | 612.31 | 733.61 | 712.66 | 298.17 |
| 5890 | 237.86 | 612.18 | 733.72 | 712.17 | 297.9  |
| 5892 | 237.76 | 612.04 | 733.81 | 711.75 | 297.56 |
| 5894 | 237.65 | 611.9  | 733.9  | 711.31 | 297.25 |
| 5896 | 237.54 | 611.76 | 733.98 | 710.85 | 296.94 |
| 5898 | 237.41 | 611.6  | 734.07 | 710.4  | 296.64 |
| 5900 | 237.3  | 611.47 | 734.18 | 709.87 | 296.35 |
| 5902 | 237.18 | 611.31 | 734.27 | 709.41 | 296.01 |
| 5904 | 237.07 | 611.19 | 734.37 | 708.98 | 295.73 |
| 5906 | 236.96 | 611.03 | 734.48 | 708.5  | 295.45 |
| 5908 | 236.82 | 610.85 | 734.53 | 707.91 | 295.13 |
| 5910 | 236.76 | 610.75 | 734.66 | 707.49 | 294.81 |
| 5912 | 236.64 | 610.61 | 734.77 | 707    | 294.5  |
| 5914 | 236.51 | 610.46 | 734.85 | 706.44 | 294.17 |
| 5916 | 236.42 | 610.3  | 734.96 | 705.89 | 293.85 |
| 5918 | 236.31 | 610.14 | 735.05 | 705.23 | 293.48 |
| 5920 | 236.22 | 610    | 735.16 | 704.68 | 293.19 |
| 5922 | 236.11 | 609.81 | 735.25 | 704.11 | 292.9  |
| 5924 | 236.01 | 609.65 | 735.35 | 703.45 | 292.62 |
| 5926 | 235.89 | 609.48 | 735.44 | 702.89 | 292.28 |
| 5928 | 235.78 | 609.29 | 735.51 | 702.31 | 291.96 |
| 5930 | 235.68 | 609.12 | 735.64 | 701.79 | 291.68 |
| 5932 | 235.56 | 608.93 | 735.72 | 701.14 | 291.36 |
| 5934 | 235.46 | 608.75 | 735.81 | 700.6  | 291    |
| 5936 | 235.35 | 608.57 | 735.9  | 700.06 | 290.69 |
| 5938 | 235.22 | 608.39 | 735.98 | 699.51 | 290.37 |
| 5940 | 235.09 | 608.15 | 736.05 | 698.93 | 290.06 |
| 5942 | 235.01 | 607.98 | 736.18 | 698.33 | 289.78 |
| 5944 | 234.9  | 607.79 | 736.27 | 697.8  | 289.44 |
| 5946 | 234.8  | 607.6  | 736.36 | 697.26 | 289.14 |
| 5948 | 234.68 | 607.36 | 736.45 | 696.72 | 288.84 |
| 5950 | 234.54 | 607.14 | 736.5  | 696.13 | 288.5  |
| 5952 | 234.46 | 606.95 | 736.62 | 695.54 | 288.14 |
| 5954 | 234.33 | 606.73 | 736.7  | 694.98 | 287.8  |
| 5956 | 234.21 | 606.5  | 736.8  | 694.45 | 287.49 |
| 5958 | 234.13 | 606.3  | 736.9  | 693.85 | 287.14 |
| 5960 | 234.01 | 606.09 | 736.97 | 693.3  | 286.82 |
| 5962 | 233.87 | 605.85 | 737.04 | 692.72 | 286.48 |
| 5964 | 233.71 | 605.56 | 737.07 | 692.13 | 286.11 |
| 5966 | 233.62 | 605.36 | 737.16 | 691.61 | 285.79 |
| 5968 | 233.51 | 605.12 | 737.25 | 690.99 | 285.47 |
| 5970 | 233.4  | 604.9  | 737.35 | 690.45 | 285.08 |
| 5972 | 233.31 | 604.69 | 737.44 | 689.92 | 284.73 |
| 5974 | 233.18 | 604.44 | 737.55 | 689.39 | 284.38 |

|      |        |        |        |        |        |
|------|--------|--------|--------|--------|--------|
| 5976 | 233.08 | 604.21 | 737.63 | 688.79 | 284.01 |
| 5978 | 232.95 | 603.96 | 737.7  | 688.24 | 283.64 |
| 5980 | 232.85 | 603.74 | 737.79 | 687.71 | 283.31 |
| 5982 | 232.71 | 603.44 | 737.86 | 687.17 | 282.97 |
| 5984 | 232.59 | 603.19 | 737.94 | 686.53 | 282.62 |
| 5986 | 232.5  | 602.96 | 738.02 | 686.01 | 282.22 |
| 5988 | 232.37 | 602.72 | 738.09 | 685.47 | 281.87 |
| 5990 | 232.26 | 602.43 | 738.15 | 684.92 | 281.52 |
| 5992 | 232.13 | 602.18 | 738.23 | 684.28 | 281.18 |
| 5994 | 232.02 | 601.93 | 738.3  | 683.74 | 280.79 |
| 5996 | 231.91 | 601.68 | 738.37 | 683.2  | 280.45 |
| 5998 | 231.77 | 601.38 | 738.42 | 682.65 | 280.1  |
| 6000 | 231.66 | 601.13 | 738.5  | 682.01 | 279.77 |
| 6002 | 231.54 | 600.86 | 738.55 | 681.46 | 279.43 |
| 6004 | 231.42 | 600.61 | 738.61 | 680.9  | 279.05 |
| 6006 | 231.28 | 600.36 | 738.66 | 680.34 | 278.73 |
| 6008 | 231.18 | 600.09 | 738.75 | 679.8  | 278.44 |
| 6010 | 231.08 | 599.85 | 738.83 | 679.18 | 278.17 |
| 6012 | 230.95 | 599.56 | 738.85 | 678.58 | 277.78 |
| 6014 | 230.82 | 599.26 | 738.88 | 678    | 277.46 |
| 6016 | 230.7  | 599    | 738.95 | 677.43 | 277.15 |
| 6018 | 230.56 | 598.73 | 738.98 | 676.73 | 276.85 |
| 6020 | 230.45 | 598.48 | 739.03 | 676.16 | 276.5  |
| 6022 | 230.33 | 598.22 | 739.06 | 675.54 | 276.18 |
| 6024 | 230.18 | 597.91 | 739.1  | 674.95 | 275.88 |
| 6026 | 230.03 | 597.63 | 739.11 | 674.24 | 275.47 |
| 6028 | 229.95 | 597.39 | 739.17 | 673.69 | 275.16 |
| 6030 | 229.81 | 597.1  | 739.19 | 673.1  | 274.83 |
| 6032 | 229.73 | 596.84 | 739.26 | 672.54 | 274.53 |
| 6034 | 229.6  | 596.56 | 739.28 | 671.96 | 274.19 |
| 6036 | 229.52 | 596.33 | 739.34 | 671.29 | 273.82 |
| 6038 | 229.4  | 596.06 | 739.37 | 670.72 | 273.51 |
| 6040 | 229.28 | 595.75 | 739.41 | 670.15 | 273.2  |
| 6042 | 229.14 | 595.45 | 739.41 | 669.41 | 272.84 |
| 6044 | 229.05 | 595.19 | 739.45 | 668.85 | 272.49 |
| 6046 | 228.98 | 594.96 | 739.51 | 668.29 | 272.19 |
| 6048 | 228.85 | 594.7  | 739.53 | 667.69 | 271.87 |
| 6050 | 228.72 | 594.37 | 739.53 | 666.96 | 271.53 |
| 6052 | 228.59 | 594.1  | 739.55 | 666.37 | 271.16 |
| 6054 | 228.49 | 593.82 | 739.57 | 665.76 | 270.84 |
| 6056 | 228.41 | 593.53 | 739.62 | 665.21 | 270.57 |
| 6058 | 228.28 | 593.24 | 739.61 | 664.6  | 270.25 |
| 6060 | 228.21 | 593    | 739.66 | 663.91 | 269.96 |
| 6062 | 228.06 | 592.69 | 739.63 | 663.27 | 269.55 |



|      |        |        |        |        |        |
|------|--------|--------|--------|--------|--------|
| 6064 | 227.95 | 592.41 | 739.65 | 662.68 | 269.24 |
| 6066 | 227.86 | 592.16 | 739.67 | 662.11 | 268.97 |
| 6068 | 227.74 | 591.83 | 739.69 | 661.39 | 268.62 |
| 6070 | 227.67 | 591.58 | 739.72 | 660.82 | 268.35 |
| 6072 | 227.59 | 591.3  | 739.75 | 660.23 | 268.06 |
| 6074 | 227.46 | 590.96 | 739.75 | 659.62 | 267.76 |
| 6076 | 227.37 | 590.7  | 739.77 | 658.93 | 267.44 |
| 6078 | 227.27 | 590.41 | 739.77 | 658.3  | 267.14 |
| 6080 | 227.16 | 590.12 | 739.77 | 657.69 | 266.84 |
| 6082 | 227.07 | 589.81 | 739.81 | 657.11 | 266.57 |
| 6084 | 226.93 | 589.48 | 739.78 | 656.46 | 266.26 |
| 6086 | 226.83 | 589.2  | 739.8  | 655.76 | 265.93 |
| 6088 | 226.77 | 588.96 | 739.86 | 655.19 | 265.67 |
| 6090 | 226.66 | 588.66 | 739.87 | 654.58 | 265.36 |
| 6092 | 226.58 | 588.34 | 739.89 | 653.99 | 265.08 |
| 6094 | 226.48 | 588.07 | 739.91 | 653.26 | 264.73 |
| 6096 | 226.35 | 587.77 | 739.91 | 652.64 | 264.41 |
| 6098 | 226.27 | 587.44 | 739.94 | 652.06 | 264.1  |
| 6100 | 226.17 | 587.14 | 739.96 | 651.46 | 263.77 |
| 6102 | 226.1  | 586.86 | 739.98 | 650.76 | 263.41 |
| 6104 | 225.98 | 586.57 | 739.99 | 650.13 | 263.09 |
| 6106 | 225.86 | 586.25 | 739.97 | 649.48 | 262.76 |
| 6108 | 225.73 | 585.95 | 739.98 | 648.87 | 262.46 |
| 6110 | 225.66 | 585.64 | 740.03 | 648.2  | 262.16 |
| 6112 | 225.56 | 585.34 | 740.05 | 647.59 | 261.86 |
| 6114 | 225.47 | 585.05 | 740.07 | 646.98 | 261.57 |
| 6116 | 225.37 | 584.73 | 740.1  | 646.38 | 261.29 |
| 6118 | 225.31 | 584.46 | 740.16 | 645.69 | 261.03 |
| 6120 | 225.17 | 584.12 | 740.14 | 645.05 | 260.65 |
| 6122 | 225.08 | 583.85 | 740.19 | 644.46 | 260.37 |
| 6124 | 225    | 583.52 | 740.23 | 643.89 | 260.08 |
| 6126 | 224.91 | 583.22 | 740.24 | 643.17 | 259.7  |
| 6128 | 224.8  | 582.91 | 740.25 | 642.56 | 259.39 |
| 6130 | 224.7  | 582.61 | 740.27 | 641.95 | 259.08 |
| 6132 | 224.63 | 582.34 | 740.33 | 641.39 | 258.83 |
| 6134 | 224.54 | 581.99 | 740.37 | 640.8  | 258.55 |
| 6136 | 224.45 | 581.68 | 740.35 | 640.06 | 258.16 |
| 6138 | 224.34 | 581.36 | 740.36 | 639.43 | 257.83 |
| 6140 | 224.27 | 581.06 | 740.43 | 638.87 | 257.53 |
| 6142 | 224.16 | 580.74 | 740.45 | 638.25 | 257.18 |
| 6144 | 224.07 | 580.43 | 740.46 | 637.54 | 256.81 |
| 6146 | 223.98 | 580.12 | 740.47 | 636.93 | 256.47 |
| 6148 | 223.88 | 579.78 | 740.5  | 636.32 | 256.15 |
| 6150 | 223.83 | 579.53 | 740.57 | 635.64 | 255.87 |

|      |        |        |        |        |        |
|------|--------|--------|--------|--------|--------|
| 6152 | 223.75 | 579.24 | 740.6  | 635.04 | 255.51 |
| 6154 | 223.66 | 578.93 | 740.61 | 634.41 | 255.17 |
| 6156 | 223.58 | 578.64 | 740.64 | 633.79 | 254.85 |
| 6158 | 223.47 | 578.29 | 740.67 | 633.16 | 254.52 |
| 6160 | 223.4  | 578.02 | 740.73 | 632.46 | 254.22 |
| 6162 | 223.35 | 577.76 | 740.78 | 631.85 | 253.85 |
| 6164 | 223.26 | 577.48 | 740.81 | 631.23 | 253.54 |
| 6166 | 223.16 | 577.19 | 740.84 | 630.59 | 253.2  |
| 6168 | 223.1  | 576.88 | 740.9  | 629.86 | 252.9  |
| 6170 | 223.04 | 576.62 | 740.95 | 629.25 | 252.56 |
| 6172 | 222.99 | 576.37 | 741    | 628.65 | 252.28 |
| 6174 | 222.89 | 576.08 | 741.03 | 628.01 | 251.96 |
| 6176 | 222.83 | 575.78 | 741.08 | 627.37 | 251.67 |
| 6178 | 222.79 | 575.53 | 741.15 | 626.66 | 251.33 |
| 6180 | 222.73 | 575.26 | 741.19 | 626.05 | 251.03 |
| 6182 | 222.68 | 574.97 | 741.25 | 625.41 | 250.7  |
| 6184 | 222.62 | 574.7  | 741.3  | 624.68 | 250.4  |
| 6186 | 222.55 | 574.45 | 741.33 | 624.05 | 250.04 |
| 6188 | 222.51 | 574.19 | 741.37 | 623.42 | 249.74 |
| 6190 | 222.47 | 573.94 | 741.42 | 622.78 | 249.45 |
| 6192 | 222.4  | 573.67 | 741.45 | 622.12 | 249.14 |
| 6194 | 222.35 | 573.35 | 741.46 | 621.38 | 248.78 |
| 6196 | 222.32 | 573.11 | 741.53 | 620.77 | 248.54 |
| 6198 | 222.28 | 572.84 | 741.55 | 620.11 | 248.24 |
| 6200 | 222.26 | 572.6  | 741.6  | 619.48 | 247.98 |
| 6202 | 222.22 | 572.31 | 741.64 | 618.75 | 247.69 |
| 6204 | 222.2  | 572.06 | 741.68 | 618.11 | 247.37 |
| 6206 | 222.18 | 571.82 | 741.72 | 617.48 | 247.09 |
| 6208 | 222.16 | 571.52 | 741.75 | 616.87 | 246.82 |
| 6210 | 222.13 | 571.27 | 741.78 | 616.11 | 246.46 |
| 6212 | 222.13 | 571.03 | 741.83 | 615.46 | 246.18 |
| 6214 | 222.1  | 570.76 | 741.85 | 614.8  | 245.88 |
| 6216 | 222.12 | 570.51 | 741.91 | 614.19 | 245.64 |
| 6218 | 222.13 | 570.25 | 741.96 | 613.45 | 245.37 |
| 6220 | 222.09 | 569.98 | 741.97 | 612.8  | 245    |
| 6222 | 222.09 | 569.73 | 742    | 612.17 | 244.72 |
| 6224 | 222.11 | 569.5  | 742.04 | 611.53 | 244.45 |
| 6226 | 222.12 | 569.21 | 742.08 | 610.78 | 244.18 |
| 6228 | 222.16 | 568.98 | 742.13 | 610.16 | 243.86 |
| 6230 | 222.16 | 568.73 | 742.17 | 609.51 | 243.56 |
| 6232 | 222.19 | 568.49 | 742.21 | 608.88 | 243.28 |
| 6234 | 222.24 | 568.24 | 742.28 | 608.26 | 243    |
| 6236 | 222.24 | 567.96 | 742.28 | 607.48 | 242.63 |
| 6238 | 222.31 | 567.75 | 742.35 | 606.88 | 242.36 |

|      |        |        |        |        |        |
|------|--------|--------|--------|--------|--------|
| 6240 | 222.37 | 567.48 | 742.39 | 606.25 | 242.08 |
| 6242 | 222.42 | 567.25 | 742.44 | 605.62 | 241.79 |
| 6244 | 222.42 | 566.96 | 742.42 | 604.81 | 241.4  |
| 6246 | 222.46 | 566.72 | 742.45 | 604.17 | 241.1  |
| 6248 | 222.49 | 566.47 | 742.47 | 603.51 | 240.8  |
| 6250 | 222.55 | 566.23 | 742.5  | 602.88 | 240.53 |
| 6252 | 222.67 | 565.99 | 742.58 | 602.17 | 240.25 |
| 6254 | 222.68 | 565.7  | 742.55 | 601.47 | 239.93 |
| 6256 | 222.74 | 565.43 | 742.56 | 600.8  | 239.65 |
| 6258 | 222.82 | 565.16 | 742.6  | 600.17 | 239.39 |
| 6260 | 222.9  | 564.93 | 742.66 | 599.44 | 239.13 |
| 6262 | 222.96 | 564.67 | 742.65 | 598.75 | 238.79 |
| 6264 | 223.03 | 564.4  | 742.66 | 598.09 | 238.51 |
| 6266 | 223.13 | 564.13 | 742.7  | 597.44 | 238.24 |
| 6268 | 223.23 | 563.89 | 742.74 | 596.7  | 237.93 |
| 6270 | 223.28 | 563.58 | 742.7  | 596.02 | 237.6  |
| 6272 | 223.42 | 563.38 | 742.78 | 595.41 | 237.39 |
| 6274 | 223.51 | 563.08 | 742.77 | 594.71 | 237.08 |
| 6276 | 223.64 | 562.82 | 742.82 | 594.08 | 236.82 |
| 6278 | 223.78 | 562.58 | 742.85 | 593.34 | 236.53 |
| 6280 | 223.88 | 562.32 | 742.85 | 592.66 | 236.25 |
| 6282 | 224.02 | 562.03 | 742.88 | 592.01 | 235.99 |
| 6284 | 224.13 | 561.75 | 742.88 | 591.34 | 235.72 |
| 6286 | 224.21 | 561.46 | 742.86 | 590.53 | 235.35 |
| 6288 | 224.39 | 561.23 | 742.91 | 589.9  | 235.1  |
| 6290 | 224.55 | 560.89 | 742.9  | 589.22 | 234.8  |
| 6292 | 224.67 | 560.63 | 742.91 | 588.44 | 234.52 |
| 6294 | 224.84 | 560.36 | 742.94 | 587.8  | 234.2  |
| 6296 | 224.97 | 560.06 | 742.93 | 587.11 | 233.88 |
| 6298 | 225.17 | 559.79 | 742.94 | 586.46 | 233.59 |
| 6300 | 225.31 | 559.45 | 742.93 | 585.78 | 233.28 |
| 6302 | 225.45 | 559.21 | 742.91 | 585.1  | 232.97 |
| 6304 | 225.6  | 558.87 | 742.9  | 584.28 | 232.6  |
| 6306 | 225.83 | 558.6  | 742.92 | 583.63 | 232.33 |
| 6308 | 226.04 | 558.3  | 742.94 | 582.98 | 232.07 |
| 6310 | 226.24 | 558.03 | 742.96 | 582.21 | 231.79 |
| 6312 | 226.38 | 557.7  | 742.91 | 581.5  | 231.39 |
| 6314 | 226.57 | 557.4  | 742.9  | 580.83 | 231.08 |
| 6316 | 226.84 | 557.08 | 742.92 | 580.18 | 230.81 |
| 6318 | 227.03 | 556.77 | 742.9  | 579.4  | 230.45 |
| 6320 | 227.29 | 556.52 | 742.94 | 578.75 | 230.19 |
| 6322 | 227.49 | 556.21 | 742.9  | 578.03 | 229.85 |
| 6324 | 227.73 | 555.86 | 742.89 | 577.36 | 229.56 |
| 6326 | 227.97 | 555.55 | 742.88 | 576.68 | 229.25 |

|      |        |        |        |        |        |
|------|--------|--------|--------|--------|--------|
| 6328 | 228.22 | 555.27 | 742.89 | 575.9  | 228.93 |
| 6330 | 228.48 | 554.96 | 742.88 | 575.21 | 228.63 |
| 6332 | 228.77 | 554.62 | 742.87 | 574.54 | 228.33 |
| 6334 | 229.04 | 554.33 | 742.85 | 573.74 | 228.04 |
| 6336 | 229.26 | 554.02 | 742.82 | 573.02 | 227.68 |
| 6338 | 229.54 | 553.75 | 742.82 | 572.36 | 227.41 |
| 6340 | 229.83 | 553.37 | 742.77 | 571.65 | 227.1  |
| 6342 | 230.12 | 553.08 | 742.76 | 571    | 226.83 |
| 6344 | 230.44 | 552.82 | 742.77 | 570.22 | 226.58 |
| 6346 | 230.7  | 552.48 | 742.72 | 569.51 | 226.21 |
| 6348 | 231    | 552.18 | 742.7  | 568.85 | 225.96 |
| 6350 | 231.35 | 551.86 | 742.69 | 568.16 | 225.68 |
| 6352 | 231.66 | 551.57 | 742.65 | 567.37 | 225.37 |
| 6354 | 231.94 | 551.25 | 742.6  | 566.68 | 225.07 |
| 6356 | 232.23 | 550.96 | 742.55 | 566    | 224.79 |
| 6358 | 232.57 | 550.6  | 742.49 | 565.3  | 224.51 |
| 6360 | 232.81 | 550.26 | 742.39 | 564.47 | 224.2  |
| 6362 | 233.11 | 549.96 | 742.35 | 563.79 | 223.89 |
| 6364 | 233.43 | 549.63 | 742.27 | 563.08 | 223.6  |
| 6366 | 233.7  | 549.23 | 742.17 | 562.35 | 223.3  |
| 6368 | 234.01 | 548.93 | 742.12 | 561.68 | 223.05 |
| 6370 | 234.29 | 548.6  | 742.04 | 560.85 | 222.72 |
| 6372 | 234.57 | 548.29 | 741.98 | 560.15 | 222.47 |
| 6374 | 234.85 | 547.98 | 741.91 | 559.45 | 222.2  |
| 6376 | 235.19 | 547.58 | 741.82 | 558.65 | 221.93 |
| 6378 | 235.46 | 547.24 | 741.73 | 557.94 | 221.61 |
| 6380 | 235.72 | 546.9  | 741.63 | 557.21 | 221.32 |
| 6382 | 236.08 | 546.59 | 741.57 | 556.52 | 221.07 |
| 6384 | 236.35 | 546.21 | 741.47 | 555.81 | 220.8  |
| 6386 | 236.6  | 545.86 | 741.35 | 554.94 | 220.48 |
| 6388 | 236.88 | 545.55 | 741.29 | 554.25 | 220.17 |
| 6390 | 237.23 | 545.24 | 741.22 | 553.56 | 219.92 |
| 6392 | 237.5  | 544.85 | 741.12 | 552.85 | 219.66 |
| 6394 | 237.78 | 544.52 | 741.02 | 552.01 | 219.38 |
| 6396 | 238.09 | 544.2  | 740.94 | 551.33 | 219.09 |
| 6398 | 238.34 | 543.86 | 740.82 | 550.59 | 218.81 |
| 6400 | 238.64 | 543.52 | 740.72 | 549.88 | 218.54 |
| 6402 | 238.9  | 543.14 | 740.59 | 549.15 | 218.27 |
| 6404 | 239.15 | 542.81 | 740.48 | 548.31 | 217.97 |
| 6406 | 239.4  | 542.46 | 740.35 | 547.57 | 217.69 |
| 6408 | 239.65 | 542.11 | 740.23 | 546.83 | 217.42 |
| 6410 | 239.94 | 541.71 | 740.07 | 545.99 | 217.14 |
| 6412 | 240.18 | 541.37 | 739.95 | 545.27 | 216.84 |
| 6414 | 240.39 | 541.01 | 739.79 | 544.51 | 216.54 |

|      |        |        |        |        |        |
|------|--------|--------|--------|--------|--------|
| 6416 | 240.68 | 540.68 | 739.66 | 543.78 | 216.29 |
| 6418 | 240.89 | 540.27 | 739.48 | 543.03 | 215.99 |
| 6420 | 241.11 | 539.93 | 739.33 | 542.17 | 215.66 |
| 6422 | 241.33 | 539.59 | 739.18 | 541.42 | 215.38 |
| 6424 | 241.56 | 539.19 | 739.01 | 540.66 | 215.06 |
| 6426 | 241.73 | 538.82 | 738.81 | 539.89 | 214.77 |
| 6428 | 241.93 | 538.46 | 738.64 | 538.99 | 214.4  |
| 6430 | 242.07 | 538.08 | 738.45 | 538.21 | 214.08 |
| 6432 | 242.26 | 537.75 | 738.3  | 537.46 | 213.81 |
| 6434 | 242.42 | 537.31 | 738.07 | 536.52 | 213.47 |
| 6436 | 242.6  | 536.99 | 737.91 | 535.77 | 213.16 |
| 6438 | 242.72 | 536.63 | 737.72 | 534.97 | 212.83 |
| 6440 | 242.86 | 536.27 | 737.53 | 534.18 | 212.51 |
| 6442 | 242.97 | 535.87 | 737.32 | 533.4  | 212.21 |
| 6444 | 243.07 | 535.52 | 737.11 | 532.46 | 211.83 |
| 6446 | 243.16 | 535.16 | 736.92 | 531.68 | 211.52 |
| 6448 | 243.23 | 534.76 | 736.72 | 530.87 | 211.2  |
| 6450 | 243.29 | 534.43 | 736.51 | 530.08 | 210.9  |
| 6452 | 243.31 | 534.1  | 736.32 | 529.15 | 210.56 |
| 6454 | 243.3  | 533.74 | 736.1  | 528.33 | 210.28 |
| 6456 | 243.26 | 533.39 | 735.88 | 527.51 | 209.93 |
| 6458 | 243.22 | 533.07 | 735.67 | 526.7  | 209.65 |
| 6460 | 243.15 | 532.67 | 735.42 | 525.76 | 209.31 |
| 6462 | 243.09 | 532.35 | 735.21 | 524.96 | 209.04 |
| 6464 | 243.02 | 532.03 | 734.99 | 524.15 | 208.77 |
| 6466 | 242.94 | 531.67 | 734.77 | 523.35 | 208.52 |
| 6468 | 242.79 | 531.31 | 734.47 | 522.37 | 208.23 |
| 6470 | 242.69 | 530.98 | 734.21 | 521.53 | 207.88 |
| 6472 | 242.59 | 530.68 | 733.99 | 520.73 | 207.62 |
| 6474 | 242.47 | 530.28 | 733.69 | 519.89 | 207.33 |
| 6476 | 242.33 | 529.94 | 733.43 | 518.89 | 206.96 |
| 6478 | 242.21 | 529.61 | 733.19 | 518.06 | 206.69 |
| 6480 | 242.13 | 529.31 | 732.96 | 517.25 | 206.41 |
| 6482 | 241.98 | 528.98 | 732.69 | 516.41 | 206.12 |
| 6484 | 241.84 | 528.58 | 732.41 | 515.54 | 205.8  |
| 6486 | 241.68 | 528.22 | 732.06 | 514.5  | 205.45 |
| 6488 | 241.55 | 527.88 | 731.81 | 513.64 | 205.11 |
| 6490 | 241.41 | 527.49 | 731.55 | 512.77 | 204.83 |
| 6492 | 241.34 | 527.2  | 731.3  | 511.97 | 204.59 |
| 6494 | 241.23 | 526.86 | 731.04 | 510.96 | 204.26 |
| 6496 | 241.15 | 526.56 | 730.79 | 510.12 | 203.99 |
| 6498 | 241.05 | 526.23 | 730.53 | 509.27 | 203.72 |
| 6500 | 240.9  | 525.84 | 730.2  | 508.25 | 203.44 |
| 6502 | 240.78 | 525.48 | 729.89 | 507.35 | 203.1  |

|      |        |        |        |        |        |
|------|--------|--------|--------|--------|--------|
| 6504 | 240.65 | 525.13 | 729.58 | 506.43 | 202.78 |
| 6506 | 240.59 | 524.84 | 729.34 | 505.61 | 202.53 |
| 6508 | 240.47 | 524.43 | 729.07 | 504.74 | 202.25 |
| 6510 | 240.36 | 524.07 | 728.7  | 503.67 | 201.93 |
| 6512 | 240.32 | 523.79 | 728.45 | 502.83 | 201.62 |
| 6514 | 240.21 | 523.45 | 728.16 | 501.95 | 201.3  |
| 6516 | 240.11 | 523.03 | 727.79 | 501.06 | 200.96 |
| 6518 | 240.03 | 522.7  | 727.51 | 500.05 | 200.61 |
| 6520 | 239.95 | 522.36 | 727.19 | 499.15 | 200.3  |
| 6522 | 239.89 | 522.04 | 726.9  | 498.28 | 200.02 |
| 6524 | 239.86 | 521.69 | 726.57 | 497.45 | 199.77 |
| 6526 | 239.74 | 521.3  | 726.19 | 496.38 | 199.42 |
| 6528 | 239.66 | 520.94 | 725.85 | 495.48 | 199.07 |
| 6530 | 239.57 | 520.58 | 725.51 | 494.59 | 198.77 |
| 6532 | 239.51 | 520.25 | 725.17 | 493.73 | 198.47 |
| 6534 | 239.46 | 519.85 | 724.77 | 492.72 | 198.14 |
| 6536 | 239.42 | 519.51 | 724.41 | 491.86 | 197.85 |
| 6538 | 239.38 | 519.17 | 724.05 | 490.99 | 197.56 |
| 6540 | 239.32 | 518.75 | 723.68 | 490.12 | 197.28 |
| 6542 | 239.27 | 518.39 | 723.22 | 489.11 | 196.98 |
| 6544 | 239.24 | 518.03 | 722.83 | 488.23 | 196.64 |
| 6546 | 239.14 | 517.63 | 722.38 | 487.32 | 196.3  |
| 6548 | 239.09 | 517.2  | 721.87 | 486.43 | 196    |
| 6550 | 239.05 | 516.84 | 721.46 | 485.44 | 195.71 |
| 6552 | 239.06 | 516.52 | 721.06 | 484.62 | 195.43 |
| 6554 | 239.01 | 516.13 | 720.58 | 483.74 | 195.11 |
| 6556 | 238.96 | 515.74 | 720.1  | 482.86 | 194.8  |
| 6558 | 238.98 | 515.34 | 719.59 | 482.03 | 194.53 |
| 6560 | 238.99 | 515    | 719.12 | 481.07 | 194.23 |
| 6562 | 238.96 | 514.61 | 718.61 | 480.22 | 193.93 |
| 6564 | 238.93 | 514.17 | 718.08 | 479.32 | 193.59 |
| 6566 | 238.9  | 513.8  | 717.49 | 478.48 | 193.29 |
| 6568 | 238.9  | 513.41 | 716.93 | 477.5  | 192.92 |
| 6570 | 238.9  | 513.05 | 716.39 | 476.67 | 192.62 |
| 6572 | 238.89 | 512.67 | 715.81 | 475.82 | 192.32 |
| 6574 | 238.85 | 512.2  | 715.16 | 474.93 | 191.99 |
| 6576 | 238.88 | 511.86 | 714.48 | 473.99 | 191.68 |
| 6578 | 238.87 | 511.47 | 713.83 | 473.14 | 191.37 |
| 6580 | 238.87 | 511.09 | 713.17 | 472.3  | 191.06 |
| 6582 | 238.85 | 510.64 | 712.48 | 471.44 | 190.76 |
| 6584 | 238.81 | 510.21 | 711.63 | 470.42 | 190.36 |
| 6586 | 238.84 | 509.86 | 710.94 | 469.62 | 190.09 |
| 6588 | 238.84 | 509.41 | 710.15 | 468.77 | 189.8  |
| 6590 | 238.88 | 509.06 | 709.28 | 467.84 | 189.52 |

|      |        |        |        |        |        |
|------|--------|--------|--------|--------|--------|
| 6592 | 238.9  | 508.68 | 708.46 | 467    | 189.19 |
| 6594 | 238.9  | 508.3  | 707.63 | 466.17 | 188.89 |
| 6596 | 238.89 | 507.89 | 706.75 | 465.29 | 188.56 |
| 6598 | 238.88 | 507.44 | 705.87 | 464.45 | 188.26 |
| 6600 | 238.92 | 507.07 | 704.82 | 463.52 | 187.95 |
| 6602 | 238.92 | 506.68 | 703.85 | 462.83 | 187.65 |
| 6604 | 238.92 | 506.31 | 702.88 | 461.84 | 187.27 |
| 6606 | 238.95 | 505.9  | 701.74 | 461.02 | 187    |
| 6608 | 238.95 | 505.52 | 700.7  | 460.05 | 186.7  |
| 6610 | 238.97 | 505.15 | 699.62 | 459.22 | 186.35 |
| 6612 | 238.99 | 504.77 | 698.5  | 458.4  | 186.05 |
| 6614 | 239    | 504.39 | 697.34 | 457.56 | 185.72 |
| 6616 | 239.01 | 503.95 | 695.97 | 456.59 | 185.36 |
| 6618 | 239.02 | 503.58 | 694.77 | 455.76 | 185.05 |
| 6620 | 239.04 | 503.21 | 693.56 | 454.94 | 184.73 |
| 6622 | 239.06 | 502.78 | 692.31 | 454.11 | 184.43 |
| 6624 | 239.08 | 502.4  | 690.83 | 453.16 | 184.14 |
| 6626 | 239.11 | 502.05 | 689.56 | 452.35 | 183.8  |
| 6628 | 239.17 | 501.72 | 688.29 | 451.56 | 183.53 |
| 6630 | 239.16 | 501.29 | 686.72 | 450.7  | 183.21 |
| 6632 | 239.17 | 500.92 | 685.39 | 449.71 | 182.86 |
| 6634 | 239.16 | 500.56 | 684.04 | 448.87 | 182.54 |
| 6636 | 239.12 | 500.17 | 682.63 | 447.98 | 182.19 |
| 6638 | 239.1  | 499.82 | 681.24 | 447.13 | 181.87 |
| 6640 | 239.14 | 499.47 | 679.89 | 446.33 | 181.62 |
| 6642 | 239.16 | 499.14 | 678.27 | 445.36 | 181.35 |
| 6644 | 239.18 | 498.83 | 676.84 | 444.53 | 181.02 |
| 6646 | 239.15 | 498.49 | 675.36 | 443.65 | 180.7  |
| 6648 | 239.16 | 498.13 | 673.65 | 442.66 | 180.41 |
| 6650 | 239.16 | 497.84 | 672.17 | 441.81 | 180.07 |
| 6652 | 239.11 | 497.51 | 670.62 | 440.9  | 179.72 |
| 6654 | 239.11 | 497.23 | 669.11 | 440.05 | 179.43 |
| 6656 | 239.09 | 496.93 | 667.56 | 439.17 | 179.11 |
| 6658 | 239.1  | 496.61 | 665.74 | 438.18 | 178.81 |
| 6660 | 239.05 | 496.31 | 664.1  | 437.26 | 178.42 |
| 6662 | 239.02 | 495.99 | 662.47 | 436.37 | 178.12 |
| 6664 | 239    | 495.72 | 660.51 | 435.34 | 177.82 |
| 6666 | 238.98 | 495.46 | 658.81 | 434.44 | 177.46 |
| 6668 | 238.94 | 495.2  | 657.07 | 433.54 | 177.16 |
| 6670 | 238.89 | 494.95 | 655.29 | 432.63 | 176.85 |
| 6672 | 238.86 | 494.66 | 653.47 | 431.73 | 176.56 |
| 6674 | 238.82 | 494.42 | 651.33 | 430.67 | 176.23 |
| 6676 | 238.74 | 494.15 | 649.4  | 429.72 | 175.91 |
| 6678 | 238.67 | 493.91 | 647.46 | 428.8  | 175.6  |

|      |        |        |        |        |        |
|------|--------|--------|--------|--------|--------|
| 6680 | 238.6  | 493.63 | 645.44 | 427.84 | 175.3  |
| 6682 | 238.53 | 493.4  | 643.02 | 426.73 | 174.99 |
| 6684 | 238.46 | 493.18 | 640.9  | 425.81 | 174.64 |
| 6686 | 238.35 | 492.91 | 638.7  | 424.83 | 174.33 |
| 6688 | 238.31 | 492.74 | 636.15 | 423.75 | 174.07 |
| 6690 | 238.21 | 492.53 | 633.87 | 422.77 | 173.72 |
| 6692 | 238.08 | 492.31 | 631.56 | 421.78 | 173.4  |
| 6694 | 237.94 | 492.1  | 629.22 | 420.79 | 173.09 |
| 6696 | 237.78 | 491.85 | 626.87 | 419.78 | 172.78 |
| 6698 | 237.63 | 491.64 | 624.12 | 418.78 | 172.47 |
| 6700 | 237.46 | 491.42 | 621.78 | 417.6  | 172.08 |
| 6702 | 237.28 | 491.23 | 619.52 | 416.57 | 171.76 |
| 6704 | 237.13 | 490.99 | 616.94 | 415.58 | 171.45 |
| 6706 | 236.93 | 490.76 | 614.72 | 414.33 | 171.04 |
| 6708 | 236.79 | 490.58 | 612.53 | 413.32 | 170.75 |
| 6710 | 236.64 | 490.38 | 610.29 | 412.29 | 170.43 |
| 6712 | 236.44 | 490.15 | 608.03 | 411.23 | 170.12 |
| 6714 | 236.28 | 489.95 | 605.33 | 410    | 169.8  |
| 6716 | 236.11 | 489.74 | 602.94 | 408.93 | 169.42 |
| 6718 | 235.87 | 489.5  | 600.53 | 407.82 | 169.06 |
| 6720 | 235.74 | 489.28 | 597.86 | 406.77 | 168.75 |
| 6722 | 235.57 | 489.06 | 595.58 | 405.55 | 168.44 |
| 6724 | 235.42 | 488.85 | 593.36 | 404.48 | 168.06 |
| 6726 | 235.27 | 488.63 | 591.15 | 403.4  | 167.73 |
| 6728 | 235.11 | 488.43 | 588.92 | 402.35 | 167.42 |
| 6730 | 234.97 | 488.16 | 586.61 | 401.31 | 167.1  |
| 6732 | 234.83 | 487.93 | 583.87 | 400.06 | 166.71 |
| 6734 | 234.66 | 487.68 | 581.49 | 398.97 | 166.37 |
| 6736 | 234.52 | 487.44 | 579.12 | 397.91 | 166.05 |
| 6738 | 234.37 | 487.19 | 576.37 | 396.84 | 165.72 |
| 6740 | 234.25 | 486.98 | 574.05 | 395.61 | 165.33 |
| 6742 | 234.09 | 486.71 | 571.72 | 394.51 | 164.97 |
| 6744 | 233.95 | 486.43 | 569.06 | 393.44 | 164.62 |
| 6746 | 233.85 | 486.2  | 566.82 | 392.25 | 164.32 |
| 6748 | 233.67 | 485.91 | 564.56 | 391.15 | 163.87 |
| 6750 | 233.57 | 485.7  | 562.39 | 390.12 | 163.57 |
| 6752 | 233.4  | 485.43 | 560.2  | 389.03 | 163.22 |
| 6754 | 233.32 | 485.18 | 557.76 | 388.01 | 162.92 |
| 6756 | 233.19 | 484.92 | 555.64 | 386.79 | 162.58 |
| 6758 | 233.05 | 484.66 | 553.54 | 385.72 | 162.14 |
| 6760 | 232.88 | 484.35 | 551.47 | 384.66 | 161.77 |
| 6762 | 232.76 | 484.09 | 549.12 | 383.45 | 161.41 |
| 6764 | 232.64 | 483.84 | 547.12 | 382.41 | 160.99 |
| 6766 | 232.56 | 483.62 | 545.23 | 381.43 | 160.69 |



|      |        |        |        |        |        |
|------|--------|--------|--------|--------|--------|
| 6768 | 232.39 | 483.32 | 543.27 | 380.38 | 160.3  |
| 6770 | 232.28 | 483    | 541.06 | 379.37 | 159.93 |
| 6772 | 232.18 | 482.77 | 539.25 | 378.22 | 159.61 |
| 6774 | 232.03 | 482.47 | 537.42 | 377.19 | 159.22 |
| 6776 | 231.9  | 482.18 | 535.65 | 376.19 | 158.9  |
| 6778 | 231.75 | 481.89 | 533.61 | 375    | 158.56 |
| 6780 | 231.58 | 481.57 | 531.86 | 373.96 | 158.13 |
| 6782 | 231.47 | 481.29 | 530.19 | 372.98 | 157.82 |
| 6784 | 231.29 | 480.95 | 528.47 | 371.98 | 157.45 |
| 6786 | 231.19 | 480.66 | 526.84 | 371.03 | 157.16 |
| 6788 | 231.05 | 480.36 | 524.91 | 369.88 | 156.83 |
| 6790 | 230.91 | 480.05 | 523.26 | 368.88 | 156.43 |
| 6792 | 230.73 | 479.71 | 521.61 | 367.89 | 156.1  |
| 6794 | 230.57 | 479.32 | 519.71 | 366.92 | 155.77 |
| 6796 | 230.39 | 478.95 | 518.07 | 365.74 | 155.39 |
| 6798 | 230.24 | 478.6  | 516.46 | 364.79 | 155.02 |
| 6800 | 230.09 | 478.26 | 514.86 | 363.81 | 154.66 |
| 6802 | 229.92 | 477.84 | 513    | 362.85 | 154.31 |
| 6804 | 229.78 | 477.49 | 511.44 | 361.73 | 153.91 |
| 6806 | 229.64 | 477.12 | 509.87 | 360.77 | 153.56 |
| 6808 | 229.51 | 476.77 | 508.35 | 359.83 | 153.23 |
| 6810 | 229.35 | 476.31 | 506.8  | 358.88 | 152.87 |
| 6812 | 229.2  | 475.93 | 505.03 | 357.79 | 152.52 |
| 6814 | 229.06 | 475.55 | 503.52 | 356.85 | 152.11 |
| 6816 | 228.9  | 475.17 | 502.02 | 355.92 | 151.78 |
| 6818 | 228.78 | 474.72 | 500.3  | 354.99 | 151.44 |
| 6820 | 228.64 | 474.31 | 498.82 | 353.91 | 151.07 |
| 6822 | 228.5  | 473.91 | 497.36 | 352.98 | 150.74 |
| 6824 | 228.37 | 473.52 | 495.91 | 352.05 | 150.42 |
| 6826 | 228.22 | 473.12 | 494.48 | 351.14 | 150.09 |
| 6828 | 228.11 | 472.66 | 492.82 | 350.23 | 149.76 |
| 6830 | 227.99 | 472.27 | 491.42 | 349.18 | 149.39 |
| 6832 | 227.87 | 471.87 | 490.02 | 348.29 | 149.07 |
| 6834 | 227.77 | 471.39 | 488.63 | 347.4  | 148.74 |
| 6836 | 227.66 | 470.98 | 487.01 | 346.33 | 148.4  |
| 6838 | 227.53 | 470.55 | 485.63 | 345.4  | 147.98 |
| 6840 | 227.42 | 470.13 | 484.26 | 344.5  | 147.63 |
| 6842 | 227.35 | 469.68 | 482.72 | 343.64 | 147.34 |
| 6844 | 227.26 | 469.26 | 481.38 | 342.62 | 146.96 |
| 6846 | 227.18 | 468.84 | 480.05 | 341.75 | 146.65 |
| 6848 | 227.09 | 468.42 | 478.72 | 340.88 | 146.33 |
| 6850 | 226.99 | 467.92 | 477.4  | 339.99 | 146.02 |
| 6852 | 226.91 | 467.48 | 475.88 | 339.09 | 145.7  |
| 6854 | 226.85 | 467.07 | 474.59 | 338.09 | 145.4  |

|      |        |        |        |        |        |
|------|--------|--------|--------|--------|--------|
| 6856 | 226.81 | 466.67 | 473.33 | 337.25 | 145.06 |
| 6858 | 226.76 | 466.26 | 472.07 | 336.42 | 144.76 |
| 6860 | 226.71 | 465.77 | 470.59 | 335.57 | 144.46 |
| 6862 | 226.66 | 465.34 | 469.33 | 334.58 | 144.1  |
| 6864 | 226.62 | 464.9  | 468.07 | 333.73 | 143.79 |
| 6866 | 226.59 | 464.49 | 466.85 | 332.9  | 143.48 |
| 6868 | 226.53 | 463.99 | 465.4  | 331.92 | 143.14 |
| 6870 | 226.51 | 463.57 | 464.18 | 331.08 | 142.79 |
| 6872 | 226.49 | 463.14 | 462.96 | 330.23 | 142.47 |
| 6874 | 226.45 | 462.72 | 461.76 | 329.4  | 142.17 |
| 6876 | 226.44 | 462.23 | 460.37 | 328.59 | 141.86 |
| 6878 | 226.45 | 461.84 | 459.2  | 327.67 | 141.53 |
| 6880 | 226.41 | 461.4  | 457.99 | 326.83 | 141.17 |
| 6882 | 226.39 | 460.97 | 456.8  | 326.01 | 140.86 |
| 6884 | 226.35 | 460.46 | 455.59 | 325.15 | 140.51 |
| 6886 | 226.36 | 460.06 | 454.25 | 324.25 | 140.18 |
| 6888 | 226.35 | 459.66 | 453.09 | 323.43 | 139.88 |
| 6890 | 226.29 | 459.16 | 451.89 | 322.57 | 139.53 |
| 6892 | 226.3  | 458.77 | 450.58 | 321.68 | 139.26 |
| 6894 | 226.29 | 458.38 | 449.43 | 320.88 | 138.9  |
| 6896 | 226.33 | 458.03 | 448.3  | 320.1  | 138.61 |
| 6898 | 226.35 | 457.65 | 447.18 | 319.32 | 138.32 |
| 6900 | 226.35 | 457.29 | 446.05 | 318.56 | 138.01 |
| 6902 | 226.36 | 456.93 | 444.76 | 317.78 | 137.74 |
| 6904 | 226.35 | 456.58 | 443.61 | 316.83 | 137.38 |
| 6906 | 226.37 | 456.29 | 442.51 | 316.09 | 137.1  |
| 6908 | 226.42 | 455.97 | 441.42 | 315.34 | 136.82 |
| 6910 | 226.42 | 455.68 | 440.13 | 314.42 | 136.51 |
| 6912 | 226.44 | 455.41 | 439.02 | 313.64 | 136.16 |
| 6914 | 226.46 | 455.13 | 437.93 | 312.88 | 135.85 |
| 6916 | 226.48 | 454.81 | 436.66 | 312.12 | 135.55 |
| 6918 | 226.52 | 454.54 | 435.58 | 311.25 | 135.19 |
| 6920 | 226.56 | 454.26 | 434.5  | 310.54 | 134.92 |
| 6922 | 226.59 | 453.96 | 433.42 | 309.78 | 134.63 |
| 6924 | 226.64 | 453.61 | 432.37 | 309.06 | 134.36 |
| 6926 | 226.64 | 453.25 | 431.08 | 308.27 | 134.02 |
| 6928 | 226.66 | 452.91 | 430.01 | 307.4  | 133.68 |
| 6930 | 226.72 | 452.59 | 428.98 | 306.71 | 133.42 |
| 6932 | 226.77 | 452.14 | 427.91 | 305.98 | 133.13 |
| 6934 | 226.8  | 451.74 | 426.65 | 305.1  | 132.82 |
| 6936 | 226.88 | 451.36 | 425.63 | 304.43 | 132.5  |
| 6938 | 226.95 | 450.95 | 424.57 | 303.74 | 132.23 |
| 6940 | 226.97 | 450.37 | 423.32 | 302.99 | 131.9  |
| 6942 | 227.05 | 449.92 | 422.29 | 302.18 | 131.61 |

|      |        |        |        |        |        |
|------|--------|--------|--------|--------|--------|
| 6944 | 227.1  | 449.42 | 421.23 | 301.46 | 131.32 |
| 6946 | 227.11 | 448.85 | 420.15 | 300.71 | 131    |
| 6948 | 227.16 | 448.21 | 419.09 | 300    | 130.71 |
| 6950 | 227.24 | 447.68 | 417.9  | 299.19 | 130.39 |
| 6952 | 227.31 | 447.12 | 416.86 | 298.5  | 130.11 |
| 6954 | 227.34 | 446.48 | 415.77 | 297.76 | 129.77 |
| 6956 | 227.42 | 445.76 | 414.75 | 297.1  | 129.49 |
| 6958 | 227.44 | 445.09 | 413.49 | 296.37 | 129.15 |
| 6960 | 227.5  | 444.44 | 412.46 | 295.57 | 128.8  |
| 6962 | 227.55 | 443.76 | 411.4  | 294.87 | 128.49 |
| 6964 | 227.6  | 442.96 | 410.35 | 294.17 | 128.19 |
| 6966 | 227.62 | 442.22 | 409.09 | 293.34 | 127.87 |
| 6968 | 227.68 | 441.52 | 408.08 | 292.68 | 127.55 |
| 6970 | 227.75 | 440.82 | 407.06 | 292.01 | 127.27 |
| 6972 | 227.82 | 440.09 | 406.01 | 291.34 | 126.98 |
| 6974 | 227.92 | 439.26 | 404.85 | 290.69 | 126.74 |
| 6976 | 227.94 | 438.49 | 403.79 | 289.89 | 126.39 |
| 6978 | 228    | 437.75 | 402.76 | 289.23 | 126.1  |
| 6980 | 228.03 | 436.85 | 401.71 | 288.56 | 125.82 |
| 6982 | 228.08 | 436.1  | 400.5  | 287.77 | 125.54 |
| 6984 | 228.12 | 435.34 | 399.46 | 287.08 | 125.22 |
| 6986 | 228.15 | 434.55 | 398.4  | 286.39 | 124.93 |
| 6988 | 228.23 | 433.76 | 397.26 | 285.75 | 124.69 |
| 6990 | 228.28 | 433.06 | 396.23 | 284.99 | 124.42 |
| 6992 | 228.33 | 432.36 | 395.21 | 284.32 | 124.1  |
| 6994 | 228.36 | 431.64 | 394.17 | 283.63 | 123.82 |
| 6996 | 228.43 | 430.97 | 393.15 | 282.98 | 123.56 |
| 6998 | 228.5  | 430.16 | 391.99 | 282.32 | 123.29 |
| 7000 | 228.53 | 429.43 | 390.96 | 281.53 | 122.95 |
| 7002 | 228.66 | 428.78 | 390.01 | 280.94 | 122.72 |
| 7004 | 228.76 | 427.94 | 389.02 | 280.29 | 122.45 |
| 7006 | 228.8  | 427.16 | 387.81 | 279.48 | 122.12 |
| 7008 | 228.92 | 426.45 | 386.85 | 278.86 | 121.82 |
| 7010 | 229.04 | 425.7  | 385.9  | 278.24 | 121.58 |
| 7012 | 229.18 | 424.94 | 384.93 | 277.6  | 121.34 |
| 7014 | 229.28 | 423.98 | 383.76 | 276.93 | 121.05 |
| 7016 | 229.42 | 423.2  | 382.8  | 276.21 | 120.77 |
| 7018 | 229.58 | 422.38 | 381.82 | 275.58 | 120.51 |
| 7020 | 229.75 | 421.39 | 380.85 | 274.92 | 120.24 |
| 7022 | 229.92 | 420.53 | 379.69 | 274.27 | 119.98 |
| 7024 | 230.11 | 419.66 | 378.73 | 273.53 | 119.69 |
| 7026 | 230.32 | 418.76 | 377.74 | 272.88 | 119.41 |
| 7028 | 230.63 | 417.89 | 376.79 | 272.27 | 119.18 |
| 7030 | 230.91 | 416.84 | 375.66 | 271.55 | 118.93 |

|      |        |        |        |        |        |
|------|--------|--------|--------|--------|--------|
| 7032 | 231.2  | 415.9  | 374.68 | 270.9  | 118.63 |
| 7034 | 231.53 | 414.98 | 373.7  | 270.27 | 118.36 |
| 7036 | 231.96 | 414.05 | 372.74 | 269.66 | 118.11 |
| 7038 | 232.3  | 412.9  | 371.57 | 268.99 | 117.79 |
| 7040 | 232.74 | 411.99 | 370.63 | 268.3  | 117.53 |
| 7042 | 233.15 | 411    | 369.64 | 267.68 | 117.26 |
| 7044 | 233.68 | 409.85 | 368.66 | 267.04 | 116.99 |
| 7046 | 234.18 | 408.89 | 367.54 | 266.34 | 116.74 |
| 7048 | 234.65 | 407.88 | 366.54 | 265.69 | 116.39 |
| 7050 | 235.2  | 406.93 | 365.6  | 265.12 | 116.17 |
| 7052 | 235.86 | 405.95 | 364.65 | 264.52 | 115.91 |
| 7054 | 236.45 | 404.84 | 363.55 | 263.94 | 115.7  |
| 7056 | 237.02 | 403.82 | 362.57 | 263.21 | 115.39 |
| 7058 | 237.63 | 402.82 | 361.61 | 262.6  | 115.13 |
| 7060 | 238.37 | 401.65 | 360.66 | 261.99 | 114.88 |
| 7062 | 239.01 | 400.67 | 359.52 | 261.37 | 114.61 |
| 7064 | 239.69 | 399.68 | 358.58 | 260.68 | 114.33 |
| 7066 | 240.36 | 398.66 | 357.6  | 260.04 | 114.04 |
| 7068 | 241.2  | 397.52 | 356.5  | 259.46 | 113.82 |
| 7070 | 241.94 | 396.54 | 355.55 | 258.77 | 113.53 |
| 7072 | 242.67 | 395.53 | 354.59 | 258.15 | 113.27 |
| 7074 | 243.45 | 394.56 | 353.67 | 257.57 | 113.05 |
| 7076 | 244.33 | 393.4  | 352.71 | 256.97 | 112.81 |
| 7078 | 245.07 | 392.42 | 351.59 | 256.26 | 112.56 |
| 7080 | 245.84 | 391.44 | 350.64 | 255.67 | 112.27 |
| 7082 | 246.59 | 390.44 | 349.69 | 255.08 | 112.03 |
| 7084 | 247.53 | 389.34 | 348.78 | 254.52 | 111.81 |
| 7086 | 248.3  | 388.37 | 347.7  | 253.94 | 111.58 |
| 7088 | 249.04 | 387.4  | 346.77 | 253.24 | 111.34 |
| 7090 | 249.92 | 386.45 | 345.81 | 252.65 | 111.06 |
| 7092 | 250.66 | 385.34 | 344.74 | 252.07 | 110.85 |
| 7094 | 251.36 | 384.38 | 343.8  | 251.49 | 110.61 |
| 7096 | 252.07 | 383.42 | 342.88 | 250.81 | 110.33 |
| 7098 | 252.77 | 382.48 | 341.98 | 250.24 | 110.1  |
| 7100 | 253.55 | 381.52 | 341.05 | 249.65 | 109.86 |
| 7102 | 254.21 | 380.42 | 339.99 | 248.97 | 109.59 |
| 7104 | 254.82 | 379.51 | 339.06 | 248.4  | 109.36 |
| 7106 | 255.42 | 378.59 | 338.15 | 247.83 | 109.14 |
| 7108 | 256.04 | 377.47 | 337.23 | 247.25 | 108.89 |
| 7110 | 256.53 | 376.51 | 336.13 | 246.54 | 108.62 |
| 7112 | 257.07 | 375.6  | 335.24 | 245.97 | 108.38 |
| 7114 | 257.59 | 374.7  | 334.35 | 245.4  | 108.15 |
| 7116 | 258.08 | 373.79 | 333.46 | 244.85 | 107.93 |
| 7118 | 258.66 | 372.73 | 332.56 | 244.28 | 107.7  |

|      |        |        |        |        |        |
|------|--------|--------|--------|--------|--------|
| 7120 | 259.15 | 371.86 | 331.56 | 243.65 | 107.47 |
| 7122 | 259.6  | 370.95 | 330.67 | 243.08 | 107.25 |
| 7124 | 260.13 | 370.05 | 329.8  | 242.53 | 107.04 |
| 7126 | 260.54 | 368.99 | 328.73 | 241.93 | 106.77 |
| 7128 | 261    | 368.13 | 327.89 | 241.3  | 106.54 |
| 7130 | 261.47 | 367.22 | 326.99 | 240.7  | 106.28 |
| 7132 | 261.85 | 366.38 | 326.15 | 240.18 | 106.09 |
| 7134 | 262.33 | 365.34 | 325.11 | 239.5  | 105.85 |
| 7136 | 262.75 | 364.45 | 324.24 | 238.93 | 105.58 |
| 7138 | 263.22 | 363.61 | 323.39 | 238.41 | 105.37 |
| 7140 | 263.71 | 362.73 | 322.51 | 237.83 | 105.12 |
| 7142 | 264.17 | 361.75 | 321.53 | 237.29 | 104.92 |
| 7144 | 264.67 | 360.94 | 320.71 | 236.7  | 104.7  |
| 7146 | 265.12 | 360.08 | 319.84 | 236.14 | 104.46 |
| 7148 | 265.67 | 359.11 | 319    | 235.6  | 104.26 |
| 7150 | 266.13 | 358.27 | 318    | 234.95 | 104.03 |
| 7152 | 266.63 | 357.46 | 317.18 | 234.42 | 103.79 |
| 7154 | 267.09 | 356.63 | 316.33 | 233.87 | 103.56 |
| 7156 | 267.67 | 355.68 | 315.5  | 233.32 | 103.35 |
| 7158 | 268.07 | 354.99 | 314.66 | 232.79 | 103.14 |
| 7160 | 268.66 | 354.05 | 313.69 | 232.18 | 102.92 |
| 7162 | 269.17 | 353.26 | 312.89 | 231.65 | 102.68 |
| 7164 | 269.69 | 352.49 | 312.07 | 231.14 | 102.49 |
| 7166 | 270.24 | 351.51 | 311.07 | 230.55 | 102.23 |
| 7168 | 270.73 | 350.72 | 310.25 | 229.91 | 101.98 |
| 7170 | 271.26 | 349.95 | 309.45 | 229.4  | 101.78 |
| 7172 | 271.89 | 349.19 | 308.66 | 228.89 | 101.59 |
| 7174 | 272.38 | 348.27 | 307.71 | 228.26 | 101.31 |
| 7176 | 272.94 | 347.54 | 306.92 | 227.75 | 101.15 |
| 7178 | 273.5  | 346.79 | 306.14 | 227.24 | 100.94 |
| 7180 | 274.15 | 345.86 | 305.33 | 226.69 | 100.7  |
| 7182 | 274.77 | 345.14 | 304.43 | 226.12 | 100.52 |
| 7184 | 275.39 | 344.42 | 303.66 | 225.61 | 100.33 |
| 7186 | 275.97 | 343.67 | 302.85 | 225.07 | 100.05 |
| 7188 | 276.58 | 342.92 | 302.05 | 224.53 | 99.83  |
| 7190 | 277.34 | 342.1  | 301.29 | 224.04 | 99.65  |
| 7192 | 277.97 | 341.36 | 300.36 | 223.42 | 99.36  |
| 7194 | 278.62 | 340.64 | 299.58 | 222.89 | 99.15  |
| 7196 | 279.36 | 339.79 | 298.8  | 222.38 | 98.93  |
| 7198 | 280    | 339.05 | 297.87 | 221.86 | 98.71  |
| 7200 | 280.71 | 338.38 | 297.15 | 221.3  | 98.52  |
| 7202 | 281.33 | 337.67 | 296.36 | 220.77 | 98.29  |
| 7204 | 282.09 | 336.86 | 295.62 | 220.29 | 98.12  |
| 7206 | 282.76 | 336.19 | 294.74 | 219.68 | 97.92  |

|      |        |        |        |        |       |
|------|--------|--------|--------|--------|-------|
| 7208 | 283.36 | 335.48 | 293.97 | 219.16 | 97.67 |
| 7210 | 283.98 | 334.8  | 293.23 | 218.67 | 97.51 |
| 7212 | 284.66 | 334.11 | 292.48 | 218.15 | 97.28 |
| 7214 | 285.23 | 333.32 | 291.62 | 217.65 | 97.09 |
| 7216 | 285.76 | 332.64 | 290.88 | 217.1  | 96.87 |
| 7218 | 286.32 | 332.02 | 290.17 | 216.64 | 96.71 |
| 7220 | 286.89 | 331.22 | 289.42 | 216.12 | 96.5  |
| 7222 | 287.35 | 330.54 | 288.57 | 215.54 | 96.3  |
| 7224 | 287.82 | 329.85 | 287.82 | 215.03 | 96.05 |
| 7226 | 288.24 | 329.18 | 287.08 | 214.53 | 95.85 |
| 7228 | 288.76 | 328.55 | 286.38 | 214.07 | 95.68 |
| 7230 | 289.14 | 327.77 | 285.52 | 213.49 | 95.47 |
| 7232 | 289.49 | 327.09 | 284.8  | 212.99 | 95.24 |
| 7234 | 289.83 | 326.42 | 284.07 | 212.49 | 95.04 |
| 7236 | 290.2  | 325.74 | 283.34 | 211.99 | 94.84 |
| 7238 | 290.54 | 325    | 282.52 | 211.51 | 94.65 |
| 7240 | 290.86 | 324.36 | 281.82 | 210.95 | 94.43 |
| 7242 | 291.21 | 323.71 | 281.12 | 210.46 | 94.23 |
| 7244 | 291.48 | 322.93 | 280.43 | 209.98 | 94.04 |
| 7246 | 291.75 | 322.3  | 279.59 | 209.41 | 93.84 |
| 7248 | 292    | 321.65 | 278.9  | 208.94 | 93.61 |
| 7250 | 292.27 | 321.05 | 278.22 | 208.48 | 93.43 |
| 7252 | 292.53 | 320.41 | 277.53 | 208.04 | 93.26 |
| 7254 | 292.76 | 319.7  | 276.77 | 207.59 | 93.1  |
| 7256 | 292.96 | 319.08 | 276.09 | 207.05 | 92.91 |
| 7258 | 293.13 | 318.46 | 275.4  | 206.58 | 92.69 |
| 7260 | 293.31 | 317.7  | 274.69 | 206.08 | 92.46 |
| 7262 | 293.52 | 317.11 | 273.91 | 205.57 | 92.28 |
| 7264 | 293.7  | 316.5  | 273.24 | 205.1  | 92.07 |
| 7266 | 293.87 | 315.9  | 272.55 | 204.62 | 91.85 |
| 7268 | 294.11 | 315.32 | 271.9  | 204.18 | 91.69 |
| 7270 | 294.28 | 314.6  | 271.09 | 203.61 | 91.45 |
| 7272 | 294.51 | 314.02 | 270.44 | 203.16 | 91.29 |
| 7274 | 294.71 | 313.43 | 269.75 | 202.68 | 91.08 |
| 7276 | 295.02 | 312.78 | 269.12 | 202.25 | 90.94 |
| 7278 | 295.24 | 312.17 | 268.3  | 201.75 | 90.71 |
| 7280 | 295.52 | 311.62 | 267.65 | 201.22 | 90.5  |
| 7282 | 295.79 | 311.06 | 266.99 | 200.77 | 90.3  |
| 7284 | 296.08 | 310.51 | 266.34 | 200.32 | 90.11 |
| 7286 | 296.46 | 309.87 | 265.59 | 199.8  | 89.92 |
| 7288 | 296.78 | 309.33 | 264.94 | 199.34 | 89.73 |
| 7290 | 297.12 | 308.81 | 264.31 | 198.89 | 89.56 |
| 7292 | 297.46 | 308.26 | 263.66 | 198.41 | 89.37 |
| 7294 | 297.78 | 307.64 | 262.92 | 197.95 | 89.2  |

|      |        |        |        |        |       |
|------|--------|--------|--------|--------|-------|
| 7296 | 298.11 | 307.11 | 262.29 | 197.44 | 89.04 |
| 7298 | 298.38 | 306.56 | 261.63 | 196.99 | 88.8  |
| 7300 | 298.72 | 305.94 | 261    | 196.55 | 88.64 |
| 7302 | 299    | 305.4  | 260.25 | 196.02 | 88.44 |
| 7304 | 299.27 | 304.89 | 259.64 | 195.6  | 88.25 |
| 7306 | 299.53 | 304.39 | 259.03 | 195.17 | 88.08 |
| 7308 | 299.72 | 303.85 | 258.38 | 194.71 | 87.87 |
| 7310 | 299.95 | 303.35 | 257.77 | 194.3  | 87.72 |
| 7312 | 300.16 | 302.75 | 257.05 | 193.8  | 87.51 |
| 7314 | 300.33 | 302.24 | 256.43 | 193.36 | 87.33 |
| 7316 | 300.53 | 301.65 | 255.83 | 192.93 | 87.16 |
| 7318 | 300.69 | 301.13 | 255.12 | 192.42 | 86.99 |
| 7320 | 300.83 | 300.61 | 254.51 | 191.98 | 86.77 |
| 7322 | 300.96 | 300.1  | 253.9  | 191.55 | 86.6  |
| 7324 | 301.07 | 299.59 | 253.27 | 191.08 | 86.39 |
| 7326 | 301.18 | 298.99 | 252.54 | 190.65 | 86.22 |
| 7328 | 301.28 | 298.48 | 251.94 | 190.14 | 86    |
| 7330 | 301.42 | 298.02 | 251.39 | 189.77 | 85.88 |
| 7332 | 301.55 | 297.46 | 250.81 | 189.36 | 85.72 |
| 7334 | 301.65 | 296.96 | 250.11 | 188.94 | 85.54 |
| 7336 | 301.75 | 296.44 | 249.5  | 188.43 | 85.33 |
| 7338 | 301.85 | 295.93 | 248.9  | 188    | 85.16 |
| 7340 | 302.02 | 295.38 | 248.33 | 187.61 | 85.02 |
| 7342 | 302.16 | 294.9  | 247.67 | 187.13 | 84.87 |
| 7344 | 302.34 | 294.42 | 247.12 | 186.74 | 84.7  |
| 7346 | 302.52 | 293.91 | 246.52 | 186.3  | 84.51 |
| 7348 | 302.71 | 293.4  | 245.93 | 185.89 | 84.35 |
| 7350 | 302.91 | 292.8  | 245.24 | 185.46 | 84.19 |
| 7352 | 303.13 | 292.32 | 244.68 | 184.96 | 84    |
| 7354 | 303.38 | 291.83 | 244.13 | 184.56 | 83.85 |
| 7356 | 303.61 | 291.19 | 243.5  | 184.11 | 83.63 |
| 7358 | 303.87 | 290.7  | 242.86 | 183.65 | 83.5  |
| 7360 | 304.11 | 290.19 | 242.27 | 183.23 | 83.3  |
| 7362 | 304.33 | 289.67 | 241.7  | 182.81 | 83.13 |
| 7364 | 304.59 | 289.2  | 241.16 | 182.45 | 83    |
| 7366 | 304.86 | 288.62 | 240.52 | 182    | 82.84 |
| 7368 | 305.1  | 288.13 | 239.98 | 181.61 | 82.67 |
| 7370 | 305.28 | 287.59 | 239.39 | 181.18 | 82.47 |
| 7372 | 305.5  | 287.03 | 238.86 | 180.81 | 82.33 |
| 7374 | 305.62 | 286.54 | 238.26 | 180.44 | 82.19 |
| 7376 | 305.61 | 285.98 | 237.65 | 179.92 | 81.95 |
| 7378 | 305.58 | 285.48 | 237.09 | 179.52 | 81.78 |
| 7380 | 305.44 | 284.99 | 236.56 | 179.13 | 81.63 |
| 7382 | 305.26 | 284.42 | 235.97 | 178.69 | 81.49 |

|      |        |        |        |        |       |
|------|--------|--------|--------|--------|-------|
| 7384 | 304.97 | 283.92 | 235.43 | 178.31 | 81.38 |
| 7386 | 304.57 | 283.4  | 234.89 | 177.93 | 81.2  |
| 7388 | 303.95 | 282.78 | 234.33 | 177.52 | 81.04 |
| 7390 | 303.27 | 282.25 | 233.7  | 177.05 | 80.87 |
| 7392 | 302.48 | 281.73 | 233.16 | 176.66 | 80.7  |
| 7394 | 301.63 | 281.26 | 232.66 | 176.31 | 80.56 |
| 7396 | 300.67 | 280.73 | 232.12 | 175.93 | 80.41 |
| 7398 | 299.52 | 280.11 | 231.58 | 175.52 | 80.22 |
| 7400 | 298.55 | 279.56 | 230.94 | 175.06 | 80.01 |
| 7402 | 297.67 | 279.07 | 230.44 | 174.72 | 79.91 |
| 7404 | 296.67 | 278.54 | 229.92 | 174.34 | 79.75 |
| 7406 | 295.88 | 277.9  | 229.29 | 173.93 | 79.58 |
| 7408 | 295.2  | 277.39 | 228.79 | 173.5  | 79.41 |
| 7410 | 294.61 | 276.9  | 228.3  | 173.14 | 79.29 |
| 7412 | 293.95 | 276.27 | 227.75 | 172.73 | 79.11 |
| 7414 | 293.47 | 275.75 | 227.14 | 172.27 | 78.97 |
| 7416 | 293.05 | 275.19 | 226.61 | 171.87 | 78.77 |
| 7418 | 292.71 | 274.66 | 226.11 | 171.5  | 78.62 |
| 7420 | 292.44 | 274.13 | 225.6  | 171.12 | 78.47 |
| 7422 | 292.23 | 273.53 | 225.1  | 170.77 | 78.33 |
| 7424 | 292.13 | 273.02 | 224.53 | 170.37 | 78.22 |
| 7426 | 292.05 | 272.48 | 224    | 169.97 | 78.03 |
| 7428 | 292.11 | 271.99 | 223.53 | 169.63 | 77.93 |
| 7430 | 292.14 | 271.34 | 222.91 | 169.24 | 77.75 |
| 7432 | 292.28 | 270.83 | 222.43 | 168.81 | 77.59 |
| 7434 | 292.42 | 270.32 | 221.95 | 168.45 | 77.46 |
| 7436 | 292.55 | 269.79 | 221.42 | 168.06 | 77.3  |
| 7438 | 292.63 | 269.16 | 220.92 | 167.68 | 77.16 |
| 7440 | 292.69 | 268.64 | 220.34 | 167.26 | 77.04 |
| 7442 | 292.73 | 268.15 | 219.86 | 166.91 | 76.88 |
| 7444 | 292.7  | 267.53 | 219.36 | 166.53 | 76.74 |
| 7446 | 292.6  | 267    | 218.75 | 166.14 | 76.58 |
| 7448 | 292.46 | 266.48 | 218.27 | 165.72 | 76.41 |
| 7450 | 292.26 | 265.98 | 217.78 | 165.36 | 76.28 |
| 7452 | 291.99 | 265.46 | 217.31 | 165    | 76.13 |
| 7454 | 291.6  | 264.86 | 216.74 | 164.57 | 75.98 |
| 7456 | 291.28 | 264.39 | 216.31 | 164.32 | 75.88 |
| 7458 | 290.89 | 263.88 | 215.82 | 163.89 | 75.71 |
| 7460 | 290.44 | 263.27 | 215.32 | 163.53 | 75.55 |
| 7462 | 290.04 | 262.76 | 214.76 | 163.19 | 75.42 |
| 7464 | 289.63 | 262.25 | 214.27 | 162.76 | 75.25 |
| 7466 | 289.2  | 261.73 | 213.79 | 162.4  | 75.1  |
| 7468 | 288.73 | 261.22 | 213.32 | 162.04 | 74.96 |
| 7470 | 288.15 | 260.67 | 212.8  | 161.69 | 74.86 |



|      |        |        |        |        |       |
|------|--------|--------|--------|--------|-------|
| 7472 | 287.58 | 260.16 | 212.32 | 161.32 | 74.7  |
| 7474 | 286.99 | 259.64 | 211.84 | 160.97 | 74.57 |
| 7476 | 286.31 | 259.12 | 211.36 | 160.6  | 74.41 |
| 7478 | 285.74 | 258.52 | 210.81 | 160.25 | 74.28 |
| 7480 | 285.18 | 258.01 | 210.34 | 159.83 | 74.12 |
| 7482 | 284.61 | 257.51 | 209.88 | 159.49 | 73.99 |
| 7484 | 283.96 | 256.94 | 209.43 | 159.16 | 73.87 |
| 7486 | 283.38 | 256.42 | 208.89 | 158.75 | 73.74 |
| 7488 | 282.8  | 255.92 | 208.43 | 158.4  | 73.57 |
| 7490 | 282.21 | 255.43 | 207.98 | 158.07 | 73.44 |
| 7492 | 281.63 | 254.93 | 207.53 | 157.73 | 73.31 |
| 7494 | 280.94 | 254.36 | 207.08 | 157.39 | 73.18 |
| 7496 | 280.34 | 253.87 | 206.55 | 157    | 73.02 |
| 7498 | 279.72 | 253.37 | 206.09 | 156.65 | 72.89 |
| 7500 | 279.01 | 252.78 | 205.65 | 156.31 | 72.76 |
| 7502 | 278.4  | 252.29 | 205.12 | 155.98 | 72.63 |
| 7504 | 277.79 | 251.8  | 204.66 | 155.58 | 72.47 |
| 7506 | 277.14 | 251.26 | 204.17 | 155.22 | 72.31 |
| 7508 | 276.54 | 250.78 | 203.74 | 154.89 | 72.19 |
| 7510 | 275.87 | 250.24 | 203.22 | 154.5  | 72.07 |
| 7512 | 275.23 | 249.71 | 202.75 | 154.15 | 71.9  |
| 7514 | 274.68 | 249.27 | 202.36 | 153.87 | 71.82 |
| 7516 | 273.98 | 248.79 | 201.93 | 153.54 | 71.69 |
| 7518 | 273.37 | 248.22 | 201.41 | 153.21 | 71.56 |
| 7520 | 272.74 | 247.76 | 200.98 | 152.83 | 71.43 |
| 7522 | 272.04 | 247.27 | 200.53 | 152.47 | 71.29 |
| 7524 | 271.19 | 246.71 | 200.1  | 152.15 | 71.17 |
| 7526 | 270.42 | 246.23 | 199.6  | 151.78 | 71.05 |
| 7528 | 269.57 | 245.74 | 199.14 | 151.44 | 70.89 |
| 7530 | 268.7  | 245.26 | 198.7  | 151.11 | 70.76 |
| 7532 | 267.65 | 244.82 | 198.29 | 150.81 | 70.64 |
| 7534 | 266.7  | 244.25 | 197.85 | 150.48 | 70.51 |
| 7536 | 265.74 | 243.78 | 197.35 | 150.12 | 70.37 |
| 7538 | 264.78 | 243.33 | 196.96 | 149.84 | 70.28 |
| 7540 | 263.62 | 242.78 | 196.53 | 149.53 | 70.17 |
| 7542 | 262.58 | 242.3  | 196.01 | 149.16 | 70.02 |
| 7544 | 261.57 | 241.86 | 195.62 | 148.82 | 69.91 |
| 7546 | 260.5  | 241.35 | 195.15 | 148.45 | 69.75 |
| 7548 | 259.47 | 240.87 | 194.73 | 148.13 | 69.63 |
| 7550 | 258.25 | 240.33 | 194.24 | 147.76 | 69.5  |
| 7552 | 257.21 | 239.87 | 193.82 | 147.46 | 69.37 |
| 7554 | 256.18 | 239.4  | 193.4  | 147.14 | 69.25 |
| 7556 | 254.98 | 238.91 | 192.98 | 146.81 | 69.12 |
| 7558 | 253.97 | 238.4  | 192.52 | 146.52 | 69.02 |

|      |        |        |        |        |       |
|------|--------|--------|--------|--------|-------|
| 7560 | 252.95 | 237.94 | 192.1  | 146.15 | 68.9  |
| 7562 | 251.92 | 237.44 | 191.66 | 145.82 | 68.73 |
| 7564 | 250.94 | 236.99 | 191.27 | 145.54 | 68.64 |
| 7566 | 249.79 | 236.47 | 190.87 | 145.24 | 68.53 |
| 7568 | 248.78 | 236.01 | 190.39 | 144.93 | 68.41 |
| 7570 | 247.79 | 235.53 | 189.97 | 144.55 | 68.26 |
| 7572 | 246.62 | 235.03 | 189.53 | 144.22 | 68.12 |
| 7574 | 245.68 | 234.55 | 189.16 | 143.96 | 68.04 |
| 7576 | 244.72 | 234.1  | 188.7  | 143.61 | 67.93 |
| 7578 | 243.73 | 233.62 | 188.28 | 143.28 | 67.77 |
| 7580 | 242.61 | 233.07 | 187.86 | 142.97 | 67.64 |
| 7582 | 241.66 | 232.6  | 187.38 | 142.62 | 67.53 |
| 7584 | 240.7  | 232.15 | 186.98 | 142.31 | 67.37 |
| 7586 | 239.8  | 231.71 | 186.6  | 142.04 | 67.29 |
| 7588 | 238.86 | 231.25 | 186.22 | 141.76 | 67.19 |
| 7590 | 237.81 | 230.74 | 185.83 | 141.46 | 67.08 |
| 7592 | 236.89 | 230.29 | 185.36 | 141.11 | 66.97 |
| 7594 | 235.97 | 229.8  | 184.94 | 140.78 | 66.82 |
| 7596 | 234.93 | 229.37 | 184.55 | 140.49 | 66.71 |
| 7598 | 234.01 | 228.82 | 184.08 | 140.17 | 66.59 |
| 7600 | 233.16 | 228.38 | 183.69 | 139.84 | 66.47 |
| 7602 | 232.24 | 227.89 | 183.28 | 139.52 | 66.33 |
| 7604 | 231.35 | 227.42 | 182.87 | 139.21 | 66.2  |
| 7606 | 230.33 | 226.9  | 182.41 | 138.87 | 66.1  |
| 7608 | 229.48 | 226.45 | 182.02 | 138.58 | 65.98 |
| 7610 | 228.64 | 226.01 | 181.64 | 138.3  | 65.86 |
| 7612 | 227.78 | 225.55 | 181.25 | 138    | 65.75 |
| 7614 | 226.95 | 225.1  | 180.86 | 137.71 | 65.64 |
| 7616 | 226    | 224.58 | 180.41 | 137.37 | 65.53 |
| 7618 | 225.04 | 224.12 | 180.03 | 137.08 | 65.39 |
| 7620 | 224.36 | 223.67 | 179.65 | 136.79 | 65.29 |
| 7622 | 223.44 | 223.18 | 179.23 | 136.49 | 65.19 |
| 7624 | 222.62 | 222.72 | 178.84 | 136.19 | 65.04 |
| 7626 | 221.83 | 222.28 | 178.45 | 135.9  | 64.93 |
| 7628 | 221.04 | 221.84 | 178.07 | 135.62 | 64.83 |
| 7630 | 220.18 | 221.37 | 177.74 | 135.36 | 64.76 |
| 7632 | 219.35 | 220.87 | 177.26 | 134.98 | 64.59 |
| 7634 | 218.62 | 220.47 | 176.92 | 134.75 | 64.53 |
| 7636 | 217.74 | 219.94 | 176.54 | 134.47 | 64.42 |
| 7638 | 217    | 219.51 | 176.11 | 134.19 | 64.3  |
| 7640 | 216.24 | 219.06 | 175.73 | 133.87 | 64.18 |
| 7642 | 215.52 | 218.64 | 175.38 | 133.61 | 64.09 |
| 7644 | 214.64 | 218.19 | 175    | 133.31 | 63.97 |
| 7646 | 213.93 | 217.7  | 174.57 | 133.01 | 63.88 |

|      |        |        |        |        |       |
|------|--------|--------|--------|--------|-------|
| 7648 | 213.23 | 217.3  | 174.22 | 132.75 | 63.78 |
| 7650 | 212.49 | 216.86 | 173.85 | 132.46 | 63.67 |
| 7652 | 211.68 | 216.43 | 173.49 | 132.2  | 63.57 |
| 7654 | 210.95 | 215.9  | 173.1  | 131.92 | 63.47 |
| 7656 | 210.25 | 215.46 | 172.65 | 131.57 | 63.31 |
| 7658 | 209.55 | 215.03 | 172.28 | 131.3  | 63.21 |
| 7660 | 208.76 | 214.53 | 171.9  | 131.04 | 63.12 |
| 7662 | 208.12 | 214.13 | 171.51 | 130.75 | 63.04 |
| 7664 | 207.4  | 213.65 | 171.11 | 130.44 | 62.9  |
| 7666 | 206.76 | 213.26 | 170.79 | 130.2  | 62.81 |
| 7668 | 205.97 | 212.84 | 170.44 | 129.93 | 62.73 |
| 7670 | 205.3  | 212.33 | 170.01 | 129.66 | 62.62 |
| 7672 | 204.67 | 211.91 | 169.66 | 129.34 | 62.52 |
| 7674 | 204.02 | 211.5  | 169.31 | 129.07 | 62.43 |
| 7676 | 203.26 | 211    | 168.95 | 128.81 | 62.33 |
| 7678 | 202.6  | 210.56 | 168.53 | 128.54 | 62.21 |
| 7680 | 201.94 | 210.11 | 168.15 | 128.21 | 62.08 |
| 7682 | 201.34 | 209.71 | 167.82 | 127.97 | 62.02 |
| 7684 | 200.71 | 209.28 | 167.46 | 127.7  | 61.9  |
| 7686 | 199.93 | 208.74 | 167    | 127.36 | 61.77 |
| 7688 | 199.29 | 208.33 | 166.65 | 127.09 | 61.67 |
| 7690 | 198.67 | 207.93 | 166.32 | 126.84 | 61.57 |
| 7692 | 197.96 | 207.5  | 165.95 | 126.58 | 61.45 |
| 7694 | 197.39 | 207.04 | 165.58 | 126.34 | 61.38 |
| 7696 | 196.81 | 206.65 | 165.26 | 126.07 | 61.3  |
| 7698 | 196.17 | 206.18 | 164.89 | 125.8  | 61.16 |
| 7700 | 195.58 | 205.75 | 164.53 | 125.54 | 61.05 |
| 7702 | 194.89 | 205.26 | 164.17 | 125.28 | 60.95 |
| 7704 | 194.33 | 204.86 | 163.78 | 124.99 | 60.85 |
| 7706 | 193.75 | 204.44 | 163.46 | 124.74 | 60.76 |
| 7708 | 193.09 | 204.03 | 163.12 | 124.48 | 60.66 |
| 7710 | 192.49 | 203.51 | 162.76 | 124.2  | 60.54 |
| 7712 | 191.94 | 203.12 | 162.37 | 123.92 | 60.44 |
| 7714 | 191.36 | 202.71 | 162.04 | 123.67 | 60.36 |
| 7716 | 190.75 | 202.32 | 161.73 | 123.44 | 60.3  |
| 7718 | 190.16 | 201.81 | 161.31 | 123.16 | 60.18 |
| 7720 | 189.62 | 201.39 | 160.98 | 122.88 | 60.07 |
| 7722 | 189.08 | 200.99 | 160.66 | 122.64 | 60    |
| 7724 | 188.54 | 200.59 | 160.33 | 122.4  | 59.91 |
| 7726 | 187.88 | 200.07 | 159.95 | 122.11 | 59.78 |
| 7728 | 187.34 | 199.66 | 159.58 | 121.85 | 59.69 |
| 7730 | 186.83 | 199.27 | 159.28 | 121.63 | 59.61 |
| 7732 | 186.2  | 198.83 | 158.92 | 121.36 | 59.48 |
| 7734 | 185.64 | 198.33 | 158.54 | 121.13 | 59.4  |

|      |        |        |        |        |       |
|------|--------|--------|--------|--------|-------|
| 7736 | 185.12 | 197.93 | 158.2  | 120.85 | 59.33 |
| 7738 | 184.55 | 197.48 | 157.84 | 120.59 | 59.18 |
| 7740 | 183.96 | 197.01 | 157.51 | 120.34 | 59.08 |
| 7742 | 183.48 | 196.63 | 157.22 | 120.13 | 59.01 |
| 7744 | 182.96 | 196.21 | 156.81 | 119.83 | 58.92 |
| 7746 | 182.45 | 195.8  | 156.48 | 119.58 | 58.8  |
| 7748 | 181.96 | 195.4  | 156.17 | 119.36 | 58.73 |
| 7750 | 181.32 | 194.89 | 155.77 | 119.09 | 58.63 |
| 7752 | 180.82 | 194.48 | 155.45 | 118.79 | 58.51 |
| 7754 | 180.35 | 194.1  | 155.16 | 118.57 | 58.43 |
| 7756 | 179.85 | 193.68 | 154.82 | 118.33 | 58.33 |
| 7758 | 179.29 | 193.2  | 154.45 | 118.06 | 58.24 |
| 7760 | 178.83 | 192.81 | 154.14 | 117.83 | 58.15 |
| 7762 | 178.31 | 192.36 | 153.78 | 117.55 | 58.03 |
| 7764 | 177.77 | 191.97 | 153.48 | 117.34 | 57.96 |
| 7766 | 177.34 | 191.54 | 153.14 | 117.13 | 57.91 |
| 7768 | 176.88 | 191.14 | 152.82 | 116.87 | 57.81 |
| 7770 | 176.41 | 190.72 | 152.51 | 116.63 | 57.72 |
| 7772 | 175.95 | 190.3  | 152.17 | 116.38 | 57.61 |
| 7774 | 175.37 | 189.87 | 151.82 | 116.12 | 57.5  |
| 7776 | 174.93 | 189.4  | 151.45 | 115.86 | 57.4  |
| 7778 | 174.48 | 189.01 | 151.13 | 115.62 | 57.31 |
| 7780 | 173.99 | 188.61 | 150.84 | 115.4  | 57.24 |
| 7782 | 173.54 | 188.14 | 150.53 | 115.18 | 57.14 |
| 7784 | 173.12 | 187.75 | 150.17 | 114.92 | 57.05 |
| 7786 | 172.69 | 187.38 | 149.88 | 114.72 | 56.97 |
| 7788 | 172.19 | 186.97 | 149.58 | 114.49 | 56.89 |
| 7790 | 171.73 | 186.49 | 149.2  | 114.25 | 56.8  |
| 7792 | 171.29 | 186.1  | 148.88 | 113.97 | 56.68 |
| 7794 | 170.88 | 185.68 | 148.57 | 113.75 | 56.6  |
| 7796 | 170.46 | 185.29 | 148.28 | 113.54 | 56.54 |
| 7798 | 169.99 | 184.82 | 147.96 | 113.29 | 56.44 |
| 7800 | 169.56 | 184.43 | 147.6  | 113.06 | 56.36 |
| 7802 | 169.18 | 184.06 | 147.34 | 112.83 | 56.28 |
| 7804 | 168.68 | 183.57 | 147.01 | 112.58 | 56.17 |
| 7806 | 168.28 | 183.25 | 146.7  | 112.36 | 56.08 |
| 7808 | 167.9  | 182.82 | 146.36 | 112.14 | 56.01 |
| 7810 | 167.51 | 182.43 | 146.07 | 111.92 | 55.93 |
| 7812 | 167.03 | 182.02 | 145.74 | 111.68 | 55.82 |
| 7814 | 166.65 | 181.58 | 145.44 | 111.47 | 55.73 |
| 7816 | 166.27 | 181.2  | 145.15 | 111.26 | 55.66 |
| 7818 | 165.91 | 180.85 | 144.81 | 111.02 | 55.57 |
| 7820 | 165.44 | 180.38 | 144.51 | 110.78 | 55.48 |
| 7822 | 165.06 | 180    | 144.17 | 110.56 | 55.39 |

|      |        |        |        |        |       |
|------|--------|--------|--------|--------|-------|
| 7824 | 164.72 | 179.66 | 143.91 | 110.34 | 55.33 |
| 7826 | 164.32 | 179.27 | 143.59 | 110.1  | 55.22 |
| 7828 | 163.95 | 178.88 | 143.28 | 109.86 | 55.12 |
| 7830 | 163.53 | 178.47 | 142.95 | 109.63 | 55.05 |
| 7832 | 163.15 | 178.06 | 142.63 | 109.43 | 54.96 |
| 7834 | 162.77 | 177.67 | 142.33 | 109.15 | 54.84 |
| 7836 | 162.38 | 177.33 | 142.06 | 108.96 | 54.78 |
| 7838 | 162.03 | 176.91 | 141.73 | 108.76 | 54.72 |
| 7840 | 161.68 | 176.55 | 141.43 | 108.51 | 54.64 |
| 7842 | 161.36 | 176.22 | 141.18 | 108.34 | 54.58 |
| 7844 | 161    | 175.84 | 140.86 | 108.1  | 54.48 |
| 7846 | 160.6  | 175.42 | 140.53 | 107.87 | 54.4  |
| 7848 | 160.29 | 175.09 | 140.26 | 107.69 | 54.34 |
| 7850 | 159.91 | 174.7  | 139.96 | 107.48 | 54.24 |
| 7852 | 159.53 | 174.38 | 139.7  | 107.28 | 54.19 |
| 7854 | 159.17 | 173.93 | 139.38 | 107.05 | 54.08 |
| 7856 | 158.84 | 173.58 | 139.05 | 106.81 | 54    |
| 7858 | 158.51 | 173.23 | 138.77 | 106.6  | 53.91 |
| 7860 | 158.13 | 172.82 | 138.5  | 106.39 | 53.83 |
| 7862 | 157.77 | 172.44 | 138.16 | 106.13 | 53.75 |
| 7864 | 157.45 | 172.1  | 137.88 | 105.93 | 53.65 |
| 7866 | 157.11 | 171.73 | 137.59 | 105.7  | 53.58 |
| 7868 | 156.77 | 171.4  | 137.32 | 105.5  | 53.52 |
| 7870 | 156.45 | 171.01 | 136.98 | 105.3  | 53.44 |
| 7872 | 156.1  | 170.62 | 136.68 | 105.04 | 53.33 |
| 7874 | 155.82 | 170.31 | 136.43 | 104.86 | 53.27 |
| 7876 | 155.48 | 169.93 | 136.17 | 104.67 | 53.2  |
| 7878 | 155.19 | 169.59 | 135.85 | 104.47 | 53.12 |
| 7880 | 154.87 | 169.23 | 135.55 | 104.22 | 53.02 |
| 7882 | 154.59 | 168.91 | 135.29 | 104.03 | 52.95 |
| 7884 | 154.31 | 168.58 | 135.02 | 103.83 | 52.88 |
| 7886 | 153.98 | 168.19 | 134.74 | 103.63 | 52.81 |
| 7888 | 153.7  | 167.86 | 134.44 | 103.4  | 52.72 |
| 7890 | 153.43 | 167.53 | 134.17 | 103.22 | 52.65 |
| 7892 | 153.08 | 167.17 | 133.87 | 103    | 52.54 |
| 7894 | 152.84 | 166.79 | 133.57 | 102.8  | 52.46 |
| 7896 | 152.6  | 166.48 | 133.31 | 102.6  | 52.39 |
| 7898 | 152.37 | 166.16 | 133.06 | 102.41 | 52.34 |
| 7900 | 152.1  | 165.78 | 132.79 | 102.22 | 52.27 |
| 7902 | 151.83 | 165.4  | 132.43 | 101.95 | 52.15 |
| 7904 | 151.63 | 165.1  | 132.18 | 101.78 | 52.1  |
| 7906 | 151.47 | 164.82 | 131.94 | 101.61 | 52.05 |
| 7908 | 151.24 | 164.5  | 131.67 | 101.4  | 51.97 |
| 7910 | 151.05 | 164.13 | 131.41 | 101.2  | 51.9  |

|      |        |        |        |        |       |
|------|--------|--------|--------|--------|-------|
| 7912 | 150.88 | 163.82 | 131.11 | 100.97 | 51.83 |
| 7914 | 150.77 | 163.56 | 130.9  | 100.84 | 51.8  |
| 7916 | 150.59 | 163.22 | 130.6  | 100.61 | 51.69 |
| 7918 | 150.43 | 162.85 | 130.29 | 100.41 | 51.61 |
| 7920 | 150.34 | 162.57 | 130.05 | 100.23 | 51.55 |
| 7922 | 150.23 | 162.26 | 129.79 | 100.01 | 51.48 |
| 7924 | 150.1  | 161.94 | 129.52 | 99.83  | 51.41 |
| 7926 | 149.99 | 161.6  | 129.24 | 99.67  | 51.35 |
| 7928 | 149.84 | 161.27 | 128.97 | 99.43  | 51.26 |
| 7930 | 149.7  | 160.97 | 128.7  | 99.24  | 51.18 |
| 7932 | 149.52 | 160.62 | 128.45 | 99.05  | 51.11 |
| 7934 | 149.37 | 160.32 | 128.15 | 98.84  | 51.05 |
| 7936 | 149.2  | 160.02 | 127.91 | 98.67  | 50.97 |
| 7938 | 149.02 | 159.72 | 127.65 | 98.49  | 50.9  |
| 7940 | 148.83 | 159.42 | 127.4  | 98.3   | 50.84 |
| 7942 | 148.61 | 159.08 | 127.15 | 98.11  | 50.77 |
| 7944 | 148.4  | 158.79 | 126.87 | 97.91  | 50.7  |
| 7946 | 148.19 | 158.48 | 126.6  | 97.7   | 50.62 |
| 7948 | 147.93 | 158.12 | 126.35 | 97.5   | 50.55 |
| 7950 | 147.74 | 157.84 | 126.07 | 97.33  | 50.49 |
| 7952 | 147.51 | 157.54 | 125.81 | 97.11  | 50.38 |
| 7954 | 147.31 | 157.25 | 125.57 | 96.95  | 50.34 |
| 7956 | 147.09 | 156.92 | 125.34 | 96.77  | 50.27 |
| 7958 | 146.88 | 156.63 | 125.06 | 96.56  | 50.19 |
| 7960 | 146.69 | 156.36 | 124.83 | 96.39  | 50.13 |
| 7962 | 146.47 | 156.05 | 124.57 | 96.2   | 50.05 |
| 7964 | 146.23 | 155.77 | 124.33 | 96.03  | 49.99 |
| 7966 | 146.01 | 155.42 | 124.02 | 95.83  | 49.9  |
| 7968 | 145.81 | 155.18 | 123.82 | 95.66  | 49.84 |
| 7970 | 145.57 | 154.82 | 123.52 | 95.44  | 49.73 |
| 7972 | 145.38 | 154.52 | 123.29 | 95.28  | 49.69 |
| 7974 | 145.19 | 154.22 | 123.02 | 95.08  | 49.62 |
| 7976 | 145    | 153.93 | 122.78 | 94.9   | 49.54 |
| 7978 | 144.8  | 153.65 | 122.54 | 94.73  | 49.48 |
| 7980 | 144.62 | 153.36 | 122.3  | 94.55  | 49.41 |
| 7982 | 144.41 | 153.02 | 122.03 | 94.35  | 49.35 |
| 7984 | 144.23 | 152.73 | 121.79 | 94.17  | 49.27 |
| 7986 | 144.04 | 152.45 | 121.56 | 94     | 49.21 |
| 7988 | 143.86 | 152.16 | 121.32 | 93.83  | 49.15 |
| 7990 | 143.6  | 151.8  | 121.02 | 93.62  | 49.06 |
| 7992 | 143.45 | 151.54 | 120.81 | 93.46  | 49    |
| 7994 | 143.27 | 151.26 | 120.58 | 93.3   | 48.94 |
| 7996 | 143.04 | 150.98 | 120.35 | 93.11  | 48.87 |
| 7998 | 142.85 | 150.64 | 120.06 | 92.93  | 48.8  |

|      |        |        |        |       |       |
|------|--------|--------|--------|-------|-------|
| 8000 | 142.68 | 150.38 | 119.85 | 92.76 | 48.75 |
| 8002 | 142.5  | 150.11 | 119.62 | 92.59 | 48.67 |
| 8004 | 142.29 | 149.78 | 119.39 | 92.41 | 48.61 |
| 8006 | 142.09 | 149.49 | 119.1  | 92.2  | 48.52 |
| 8008 | 141.92 | 149.23 | 118.89 | 92.04 | 48.47 |
| 8010 | 141.7  | 148.93 | 118.64 | 91.85 | 48.4  |
| 8012 | 141.52 | 148.66 | 118.43 | 91.71 | 48.35 |
| 8014 | 141.33 | 148.36 | 118.22 | 91.56 | 48.29 |
| 8016 | 141.12 | 148.05 | 117.92 | 91.34 | 48.2  |
| 8018 | 140.92 | 147.77 | 117.7  | 91.18 | 48.14 |
| 8020 | 140.71 | 147.48 | 117.47 | 91.02 | 48.08 |
| 8022 | 140.5  | 147.19 | 117.2  | 90.84 | 48    |
| 8024 | 140.36 | 146.95 | 117    | 90.67 | 47.94 |
| 8026 | 140.14 | 146.63 | 116.74 | 90.47 | 47.84 |
| 8028 | 139.97 | 146.35 | 116.55 | 90.35 | 47.82 |
| 8030 | 139.8  | 146.09 | 116.29 | 90.16 | 47.76 |
| 8032 | 139.63 | 145.81 | 116.06 | 90    | 47.7  |
| 8034 | 139.49 | 145.57 | 115.87 | 89.85 | 47.65 |
| 8036 | 139.33 | 145.3  | 115.64 | 89.7  | 47.59 |
| 8038 | 139.18 | 144.99 | 115.39 | 89.53 | 47.53 |
| 8040 | 139.04 | 144.73 | 115.16 | 89.35 | 47.47 |
| 8042 | 138.91 | 144.48 | 114.95 | 89.19 | 47.42 |
| 8044 | 138.76 | 144.18 | 114.73 | 89.03 | 47.37 |
| 8046 | 138.63 | 143.92 | 114.48 | 88.83 | 47.3  |
| 8048 | 138.51 | 143.65 | 114.25 | 88.67 | 47.22 |
| 8050 | 138.39 | 143.37 | 114.02 | 88.49 | 47.16 |
| 8052 | 138.3  | 143.13 | 113.82 | 88.34 | 47.11 |
| 8054 | 138.21 | 142.84 | 113.61 | 88.18 | 47.05 |
| 8056 | 138.14 | 142.6  | 113.36 | 88    | 46.99 |
| 8058 | 138.06 | 142.36 | 113.15 | 87.84 | 46.92 |
| 8060 | 137.96 | 142.11 | 112.94 | 87.69 | 46.86 |
| 8062 | 137.84 | 141.78 | 112.66 | 87.51 | 46.76 |
| 8064 | 137.82 | 141.57 | 112.49 | 87.35 | 46.71 |
| 8066 | 137.71 | 141.29 | 112.24 | 87.17 | 46.61 |
| 8068 | 137.64 | 141.04 | 112.04 | 87.02 | 46.56 |
| 8070 | 137.58 | 140.79 | 111.86 | 86.91 | 46.55 |
| 8072 | 137.45 | 140.51 | 111.57 | 86.67 | 46.44 |
| 8074 | 137.39 | 140.27 | 111.38 | 86.52 | 46.39 |
| 8076 | 137.29 | 140.04 | 111.16 | 86.36 | 46.32 |
| 8078 | 137.17 | 139.75 | 110.9  | 86.19 | 46.26 |
| 8080 | 137.09 | 139.51 | 110.69 | 86.01 | 46.2  |
| 8082 | 137    | 139.29 | 110.48 | 85.87 | 46.14 |
| 8084 | 136.87 | 139.01 | 110.27 | 85.71 | 46.08 |
| 8086 | 136.76 | 138.78 | 110.01 | 85.55 | 46    |

|      |        |        |        |       |       |
|------|--------|--------|--------|-------|-------|
| 8088 | 136.65 | 138.55 | 109.81 | 85.37 | 45.94 |
| 8090 | 136.58 | 138.35 | 109.64 | 85.27 | 45.91 |
| 8092 | 136.48 | 138.12 | 109.46 | 85.15 | 45.88 |
| 8094 | 136.36 | 137.89 | 109.27 | 85.02 | 45.81 |
| 8096 | 136.21 | 137.65 | 109.01 | 84.82 | 45.73 |
| 8098 | 136.07 | 137.4  | 108.78 | 84.63 | 45.65 |
| 8100 | 135.92 | 137.18 | 108.57 | 84.49 | 45.6  |
| 8102 | 135.81 | 136.94 | 108.36 | 84.35 | 45.56 |
| 8104 | 135.65 | 136.73 | 108.16 | 84.18 | 45.48 |
| 8106 | 135.49 | 136.47 | 107.92 | 84.01 | 45.41 |
| 8108 | 135.34 | 136.26 | 107.74 | 83.87 | 45.36 |
| 8110 | 135.2  | 136.04 | 107.53 | 83.74 | 45.33 |
| 8112 | 135.03 | 135.8  | 107.32 | 83.57 | 45.27 |
| 8114 | 134.91 | 135.63 | 107.16 | 83.45 | 45.24 |
| 8116 | 134.75 | 135.38 | 106.98 | 83.32 | 45.19 |
| 8118 | 134.58 | 135.15 | 106.74 | 83.17 | 45.12 |
| 8120 | 134.41 | 134.91 | 106.52 | 82.97 | 45.03 |
| 8122 | 134.23 | 134.69 | 106.3  | 82.82 | 44.97 |
| 8124 | 134.06 | 134.46 | 106.09 | 82.66 | 44.9  |
| 8126 | 133.89 | 134.23 | 105.91 | 82.52 | 44.86 |
| 8128 | 133.73 | 134.02 | 105.7  | 82.36 | 44.83 |
| 8130 | 133.58 | 133.84 | 105.52 | 82.23 | 44.78 |
| 8132 | 133.38 | 133.63 | 105.33 | 82.09 | 44.74 |
| 8134 | 133.19 | 133.37 | 105.08 | 81.93 | 44.67 |
| 8136 | 133.02 | 133.17 | 104.89 | 81.76 | 44.6  |
| 8138 | 132.87 | 132.98 | 104.7  | 81.62 | 44.56 |
| 8140 | 132.66 | 132.77 | 104.52 | 81.49 | 44.51 |
| 8142 | 132.45 | 132.51 | 104.31 | 81.34 | 44.45 |
| 8144 | 132.29 | 132.3  | 104.1  | 81.19 | 44.39 |
| 8146 | 132.12 | 132.12 | 103.94 | 81.07 | 44.36 |
| 8148 | 131.89 | 131.89 | 103.74 | 80.91 | 44.28 |
| 8150 | 131.72 | 131.66 | 103.55 | 80.77 | 44.22 |
| 8152 | 131.55 | 131.47 | 103.35 | 80.63 | 44.18 |
| 8154 | 131.37 | 131.27 | 103.18 | 80.51 | 44.14 |
| 8156 | 131.15 | 131.04 | 103    | 80.37 | 44.09 |
| 8158 | 130.95 | 130.82 | 102.76 | 80.22 | 44.02 |
| 8160 | 130.78 | 130.63 | 102.59 | 80.07 | 43.98 |
| 8162 | 130.58 | 130.43 | 102.41 | 79.93 | 43.93 |
| 8164 | 130.39 | 130.23 | 102.21 | 79.79 | 43.88 |
| 8166 | 130.16 | 129.99 | 102    | 79.63 | 43.82 |
| 8168 | 129.95 | 129.78 | 101.84 | 79.51 | 43.78 |
| 8170 | 129.75 | 129.57 | 101.62 | 79.35 | 43.72 |
| 8172 | 129.52 | 129.36 | 101.44 | 79.22 | 43.67 |
| 8174 | 129.31 | 129.12 | 101.22 | 79.09 | 43.62 |



|      |        |        |        |       |       |
|------|--------|--------|--------|-------|-------|
| 8176 | 129.1  | 128.91 | 101.05 | 78.93 | 43.57 |
| 8178 | 128.88 | 128.69 | 100.84 | 78.77 | 43.49 |
| 8180 | 128.66 | 128.46 | 100.69 | 78.66 | 43.47 |
| 8182 | 128.43 | 128.27 | 100.49 | 78.51 | 43.38 |
| 8184 | 128.26 | 128.06 | 100.3  | 78.38 | 43.35 |
| 8186 | 128.01 | 127.83 | 100.1  | 78.22 | 43.28 |
| 8188 | 127.78 | 127.62 | 99.92  | 78.08 | 43.21 |
| 8190 | 127.59 | 127.4  | 99.76  | 77.97 | 43.19 |
| 8192 | 127.36 | 127.18 | 99.54  | 77.8  | 43.14 |
| 8194 | 127.17 | 126.99 | 99.38  | 77.68 | 43.08 |
| 8196 | 126.94 | 126.76 | 99.2   | 77.55 | 43.03 |
| 8198 | 126.74 | 126.57 | 99.01  | 77.44 | 43    |
| 8200 | 126.49 | 126.33 | 98.81  | 77.26 | 42.93 |
| 8202 | 126.25 | 126.11 | 98.63  | 77.12 | 42.88 |
| 8204 | 126.05 | 125.89 | 98.45  | 76.97 | 42.81 |
| 8206 | 125.77 | 125.63 | 98.23  | 76.8  | 42.74 |
| 8208 | 125.56 | 125.43 | 98.07  | 76.72 | 42.71 |
| 8210 | 125.34 | 125.22 | 97.88  | 76.56 | 42.64 |
| 8212 | 125.11 | 125.01 | 97.71  | 76.43 | 42.59 |
| 8214 | 124.9  | 124.78 | 97.52  | 76.32 | 42.56 |
| 8216 | 124.69 | 124.57 | 97.36  | 76.2  | 42.52 |
| 8218 | 124.47 | 124.37 | 97.2   | 76.08 | 42.48 |
| 8220 | 124.28 | 124.18 | 97.05  | 75.98 | 42.45 |
| 8222 | 124    | 123.91 | 96.83  | 75.8  | 42.37 |
| 8224 | 123.8  | 123.71 | 96.67  | 75.69 | 42.33 |
| 8226 | 123.56 | 123.48 | 96.49  | 75.54 | 42.26 |
| 8228 | 123.29 | 123.27 | 96.31  | 75.41 | 42.2  |
| 8230 | 123.09 | 123.03 | 96.11  | 75.28 | 42.16 |
| 8232 | 122.86 | 122.8  | 95.93  | 75.12 | 42.1  |
| 8234 | 122.64 | 122.6  | 95.77  | 75.01 | 42.06 |
| 8236 | 122.42 | 122.38 | 95.61  | 74.91 | 42.03 |
| 8238 | 122.17 | 122.14 | 95.41  | 74.74 | 41.96 |
| 8240 | 121.97 | 121.95 | 95.26  | 74.65 | 41.93 |
| 8242 | 121.75 | 121.73 | 95.09  | 74.49 | 41.85 |
| 8244 | 121.51 | 121.54 | 94.94  | 74.38 | 41.84 |
| 8246 | 121.29 | 121.29 | 94.75  | 74.26 | 41.78 |
| 8248 | 121.03 | 121.04 | 94.55  | 74.08 | 41.71 |
| 8250 | 120.83 | 120.85 | 94.39  | 73.98 | 41.67 |
| 8252 | 120.57 | 120.6  | 94.24  | 73.86 | 41.63 |
| 8254 | 120.34 | 120.37 | 94.01  | 73.7  | 41.55 |
| 8256 | 120.13 | 120.17 | 93.87  | 73.57 | 41.51 |
| 8258 | 119.91 | 119.96 | 93.7   | 73.45 | 41.45 |
| 8260 | 119.68 | 119.75 | 93.55  | 73.33 | 41.4  |
| 8262 | 119.48 | 119.54 | 93.42  | 73.26 | 41.39 |

|      |        |        |       |       |       |
|------|--------|--------|-------|-------|-------|
| 8264 | 119.24 | 119.3  | 93.19 | 73.09 | 41.31 |
| 8266 | 119.02 | 119.09 | 93.04 | 72.97 | 41.27 |
| 8268 | 118.77 | 118.88 | 92.89 | 72.86 | 41.23 |
| 8270 | 118.56 | 118.63 | 92.69 | 72.73 | 41.17 |
| 8272 | 118.34 | 118.42 | 92.52 | 72.58 | 41.12 |
| 8274 | 118.13 | 118.22 | 92.37 | 72.47 | 41.09 |
| 8276 | 117.9  | 117.99 | 92.19 | 72.33 | 41.03 |
| 8278 | 117.65 | 117.76 | 92.02 | 72.2  | 41    |
| 8280 | 117.46 | 117.58 | 91.87 | 72.1  | 40.96 |
| 8282 | 117.24 | 117.36 | 91.72 | 71.98 | 40.91 |
| 8284 | 116.98 | 117.13 | 91.56 | 71.86 | 40.85 |
| 8286 | 116.76 | 116.88 | 91.37 | 71.73 | 40.79 |
| 8288 | 116.54 | 116.66 | 91.21 | 71.58 | 40.74 |
| 8290 | 116.33 | 116.46 | 91.05 | 71.47 | 40.69 |
| 8292 | 116.09 | 116.25 | 90.9  | 71.35 | 40.65 |
| 8294 | 115.89 | 116.02 | 90.75 | 71.24 | 40.6  |
| 8296 | 115.67 | 115.8  | 90.56 | 71.11 | 40.56 |
| 8298 | 115.46 | 115.59 | 90.4  | 71    | 40.5  |
| 8300 | 115.22 | 115.39 | 90.25 | 70.89 | 40.46 |
| 8302 | 115.02 | 115.15 | 90.07 | 70.78 | 40.41 |
| 8304 | 114.81 | 114.94 | 89.92 | 70.65 | 40.37 |
| 8306 | 114.61 | 114.74 | 89.77 | 70.54 | 40.32 |
| 8308 | 114.36 | 114.49 | 89.61 | 70.42 | 40.28 |
| 8310 | 114.15 | 114.28 | 89.44 | 70.3  | 40.26 |
| 8312 | 113.97 | 114.11 | 89.32 | 70.21 | 40.23 |
| 8314 | 113.77 | 113.9  | 89.15 | 70.08 | 40.17 |
| 8316 | 113.52 | 113.68 | 88.99 | 69.97 | 40.13 |
| 8318 | 113.3  | 113.44 | 88.82 | 69.86 | 40.09 |
| 8320 | 113.09 | 113.21 | 88.65 | 69.69 | 40.02 |
| 8322 | 112.88 | 113.01 | 88.5  | 69.58 | 39.97 |
| 8324 | 112.65 | 112.78 | 88.34 | 69.47 | 39.93 |
| 8326 | 112.45 | 112.58 | 88.17 | 69.35 | 39.88 |
| 8328 | 112.26 | 112.38 | 88.02 | 69.23 | 39.83 |
| 8330 | 112.06 | 112.18 | 87.87 | 69.12 | 39.79 |
| 8332 | 111.83 | 111.95 | 87.72 | 69    | 39.75 |
| 8334 | 111.62 | 111.75 | 87.55 | 68.87 | 39.7  |
| 8336 | 111.43 | 111.55 | 87.41 | 68.77 | 39.66 |
| 8338 | 111.23 | 111.35 | 87.27 | 68.66 | 39.62 |
| 8340 | 110.98 | 111.12 | 87.09 | 68.53 | 39.54 |
| 8342 | 110.79 | 110.9  | 86.96 | 68.46 | 39.52 |
| 8344 | 110.58 | 110.68 | 86.78 | 68.32 | 39.46 |
| 8346 | 110.38 | 110.48 | 86.63 | 68.2  | 39.42 |
| 8348 | 110.2  | 110.31 | 86.5  | 68.13 | 39.4  |
| 8350 | 109.96 | 110.05 | 86.35 | 68.01 | 39.34 |

|      |        |        |       |       |       |
|------|--------|--------|-------|-------|-------|
| 8352 | 109.78 | 109.87 | 86.19 | 67.9  | 39.31 |
| 8354 | 109.57 | 109.66 | 86.03 | 67.78 | 39.26 |
| 8356 | 109.34 | 109.46 | 85.88 | 67.65 | 39.21 |
| 8358 | 109.15 | 109.24 | 85.71 | 67.53 | 39.17 |
| 8360 | 108.96 | 109.05 | 85.59 | 67.43 | 39.15 |
| 8362 | 108.75 | 108.83 | 85.43 | 67.31 | 39.09 |
| 8364 | 108.58 | 108.65 | 85.31 | 67.22 | 39.07 |
| 8366 | 108.33 | 108.39 | 85.11 | 67.06 | 39.01 |
| 8368 | 108.11 | 108.17 | 84.95 | 66.95 | 38.94 |
| 8370 | 107.96 | 108.03 | 84.85 | 66.88 | 38.94 |
| 8372 | 107.8  | 107.85 | 84.72 | 66.8  | 38.91 |
| 8374 | 107.59 | 107.63 | 84.59 | 66.71 | 38.87 |
| 8376 | 107.35 | 107.38 | 84.37 | 66.53 | 38.78 |
| 8378 | 107.18 | 107.2  | 84.23 | 66.44 | 38.74 |
| 8380 | 107    | 107.04 | 84.12 | 66.37 | 38.74 |
| 8382 | 106.82 | 106.84 | 83.97 | 66.29 | 38.72 |
| 8384 | 106.63 | 106.65 | 83.83 | 66.17 | 38.67 |
| 8386 | 106.42 | 106.42 | 83.66 | 66.03 | 38.6  |
| 8388 | 106.25 | 106.25 | 83.55 | 65.94 | 38.59 |
| 8390 | 105.99 | 106.03 | 83.38 | 65.81 | 38.52 |
| 8392 | 105.83 | 105.82 | 83.23 | 65.7  | 38.5  |
| 8394 | 105.66 | 105.63 | 83.1  | 65.6  | 38.46 |
| 8396 | 105.46 | 105.46 | 82.98 | 65.52 | 38.44 |
| 8398 | 105.26 | 105.23 | 82.84 | 65.41 | 38.4  |
| 8400 | 105.08 | 105.04 | 82.68 | 65.29 | 38.36 |
| 8402 | 104.87 | 104.84 | 82.53 | 65.18 | 38.31 |
| 8404 | 104.67 | 104.66 | 82.4  | 65.08 | 38.27 |
| 8406 | 104.48 | 104.43 | 82.21 | 64.96 | 38.22 |
| 8408 | 104.32 | 104.26 | 82.1  | 64.86 | 38.2  |
| 8410 | 104.15 | 104.07 | 81.97 | 64.77 | 38.17 |
| 8412 | 103.91 | 103.82 | 81.8  | 64.65 | 38.1  |
| 8414 | 103.74 | 103.65 | 81.66 | 64.54 | 38.08 |
| 8416 | 103.57 | 103.48 | 81.53 | 64.44 | 38.04 |
| 8418 | 103.41 | 103.3  | 81.41 | 64.36 | 38.01 |
| 8420 | 103.24 | 103.13 | 81.28 | 64.27 | 37.98 |
| 8422 | 103    | 102.88 | 81.1  | 64.13 | 37.9  |
| 8424 | 102.85 | 102.73 | 81    | 64.07 | 37.9  |
| 8426 | 102.66 | 102.52 | 80.84 | 63.96 | 37.86 |
| 8428 | 102.47 | 102.34 | 80.7  | 63.85 | 37.81 |
| 8430 | 102.26 | 102.09 | 80.55 | 63.72 | 37.74 |
| 8432 | 102.08 | 101.92 | 80.39 | 63.61 | 37.71 |
| 8434 | 101.94 | 101.76 | 80.3  | 63.54 | 37.69 |
| 8436 | 101.73 | 101.55 | 80.14 | 63.45 | 37.66 |
| 8438 | 101.56 | 101.37 | 80    | 63.34 | 37.61 |

|      |        |        |       |       |       |
|------|--------|--------|-------|-------|-------|
| 8440 | 101.38 | 101.17 | 79.86 | 63.22 | 37.56 |
| 8442 | 101.2  | 101    | 79.72 | 63.11 | 37.52 |
| 8444 | 101.03 | 100.82 | 79.6  | 63.03 | 37.48 |
| 8446 | 100.86 | 100.63 | 79.49 | 62.95 | 37.47 |
| 8448 | 100.71 | 100.47 | 79.36 | 62.87 | 37.44 |
| 8450 | 100.53 | 100.28 | 79.22 | 62.76 | 37.38 |
| 8452 | 100.3  | 100.07 | 79.05 | 62.64 | 37.31 |
| 8454 | 100.15 | 99.88  | 78.93 | 62.56 | 37.28 |
| 8456 | 99.97  | 99.68  | 78.77 | 62.44 | 37.24 |
| 8458 | 99.83  | 99.54  | 78.68 | 62.39 | 37.24 |
| 8460 | 99.67  | 99.36  | 78.57 | 62.33 | 37.22 |
| 8462 | 99.48  | 99.16  | 78.39 | 62.18 | 37.14 |
| 8464 | 99.28  | 98.97  | 78.25 | 62.06 | 37.1  |
| 8466 | 99.12  | 98.79  | 78.13 | 61.98 | 37.09 |
| 8468 | 98.95  | 98.62  | 77.99 | 61.88 | 37.04 |
| 8470 | 98.73  | 98.39  | 77.83 | 61.75 | 36.97 |
| 8472 | 98.58  | 98.22  | 77.7  | 61.66 | 36.95 |
| 8474 | 98.43  | 98.07  | 77.58 | 61.56 | 36.91 |
| 8476 | 98.23  | 97.88  | 77.44 | 61.46 | 36.87 |
| 8478 | 98.06  | 97.68  | 77.31 | 61.37 | 36.83 |
| 8480 | 97.92  | 97.51  | 77.19 | 61.27 | 36.79 |
| 8482 | 97.73  | 97.31  | 77.05 | 61.17 | 36.72 |
| 8484 | 97.54  | 97.14  | 76.93 | 61.09 | 36.7  |
| 8486 | 97.4   | 96.96  | 76.8  | 61.01 | 36.68 |
| 8488 | 97.24  | 96.79  | 76.69 | 60.9  | 36.66 |
| 8490 | 97.09  | 96.63  | 76.57 | 60.82 | 36.62 |
| 8492 | 96.91  | 96.44  | 76.44 | 60.74 | 36.59 |
| 8494 | 96.74  | 96.26  | 76.3  | 60.63 | 36.55 |
| 8496 | 96.6   | 96.11  | 76.2  | 60.57 | 36.55 |
| 8498 | 96.42  | 95.92  | 76.05 | 60.45 | 36.48 |
| 8500 | 96.25  | 95.74  | 75.92 | 60.35 | 36.44 |
| 8502 | 96.07  | 95.55  | 75.78 | 60.24 | 36.4  |
| 8504 | 95.89  | 95.38  | 75.64 | 60.15 | 36.36 |
| 8506 | 95.78  | 95.27  | 75.56 | 60.1  | 36.36 |
| 8508 | 95.63  | 95.09  | 75.43 | 59.99 | 36.31 |
| 8510 | 95.42  | 94.88  | 75.29 | 59.89 | 36.26 |
| 8512 | 95.25  | 94.69  | 75.13 | 59.76 | 36.19 |
| 8514 | 95.1   | 94.52  | 75.01 | 59.68 | 36.17 |
| 8516 | 94.9   | 94.34  | 74.87 | 59.57 | 36.11 |
| 8518 | 94.74  | 94.15  | 74.74 | 59.47 | 36.07 |
| 8520 | 94.62  | 94.01  | 74.64 | 59.41 | 36.06 |
| 8522 | 94.45  | 93.84  | 74.52 | 59.33 | 36.02 |
| 8524 | 94.29  | 93.7   | 74.42 | 59.27 | 36    |
| 8526 | 94.14  | 93.54  | 74.3  | 59.18 | 35.97 |

|      |       |       |       |       |       |
|------|-------|-------|-------|-------|-------|
| 8528 | 94.01 | 93.35 | 74.17 | 59.09 | 35.95 |
| 8530 | 93.85 | 93.18 | 74.04 | 58.99 | 35.91 |
| 8532 | 93.68 | 93    | 73.92 | 58.9  | 35.86 |
| 8534 | 93.52 | 92.83 | 73.78 | 58.81 | 35.82 |
| 8536 | 93.38 | 92.68 | 73.67 | 58.71 | 35.79 |
| 8538 | 93.23 | 92.52 | 73.55 | 58.63 | 35.75 |
| 8540 | 93.1  | 92.37 | 73.45 | 58.57 | 35.76 |
| 8542 | 92.95 | 92.19 | 73.32 | 58.47 | 35.73 |
| 8544 | 92.8  | 92.04 | 73.21 | 58.38 | 35.69 |
| 8546 | 92.64 | 91.87 | 73.07 | 58.28 | 35.64 |
| 8548 | 92.5  | 91.73 | 72.98 | 58.22 | 35.63 |
| 8550 | 92.34 | 91.55 | 72.85 | 58.12 | 35.6  |
| 8552 | 92.17 | 91.38 | 72.72 | 58.02 | 35.55 |
| 8554 | 92.03 | 91.23 | 72.61 | 57.94 | 35.53 |
| 8556 | 91.9  | 91.09 | 72.5  | 57.87 | 35.5  |
| 8558 | 91.73 | 90.91 | 72.39 | 57.79 | 35.47 |
| 8560 | 91.54 | 90.72 | 72.23 | 57.68 | 35.4  |
| 8562 | 91.43 | 90.58 | 72.12 | 57.59 | 35.38 |
| 8564 | 91.26 | 90.42 | 72.02 | 57.51 | 35.36 |
| 8566 | 91.11 | 90.23 | 71.87 | 57.4  | 35.31 |
| 8568 | 91    | 90.1  | 71.79 | 57.34 | 35.31 |
| 8570 | 90.85 | 89.95 | 71.67 | 57.26 | 35.28 |
| 8572 | 90.68 | 89.8  | 71.56 | 57.19 | 35.25 |
| 8574 | 90.54 | 89.63 | 71.43 | 57.1  | 35.21 |
| 8576 | 90.4  | 89.48 | 71.31 | 57.01 | 35.18 |
| 8578 | 90.26 | 89.33 | 71.21 | 56.93 | 35.15 |
| 8580 | 90.08 | 89.17 | 71.08 | 56.84 | 35.1  |
| 8582 | 89.93 | 88.98 | 70.94 | 56.77 | 35.06 |
| 8584 | 89.8  | 88.83 | 70.85 | 56.67 | 35.03 |
| 8586 | 89.7  | 88.71 | 70.76 | 56.62 | 35.03 |
| 8588 | 89.52 | 88.52 | 70.63 | 56.53 | 34.99 |
| 8590 | 89.4  | 88.38 | 70.53 | 56.45 | 34.96 |
| 8592 | 89.24 | 88.21 | 70.39 | 56.34 | 34.91 |
| 8594 | 89.13 | 88.08 | 70.31 | 56.28 | 34.9  |
| 8596 | 88.94 | 87.91 | 70.18 | 56.18 | 34.84 |
| 8598 | 88.83 | 87.76 | 70.06 | 56.1  | 34.83 |
| 8600 | 88.68 | 87.62 | 69.96 | 56.02 | 34.81 |
| 8602 | 88.54 | 87.48 | 69.85 | 55.94 | 34.78 |
| 8604 | 88.39 | 87.31 | 69.75 | 55.87 | 34.75 |
| 8606 | 88.25 | 87.17 | 69.62 | 55.77 | 34.72 |
| 8608 | 88.1  | 87.01 | 69.51 | 55.68 | 34.67 |
| 8610 | 87.98 | 86.88 | 69.41 | 55.61 | 34.66 |
| 8612 | 87.86 | 86.73 | 69.31 | 55.54 | 34.64 |
| 8614 | 87.71 | 86.57 | 69.2  | 55.47 | 34.62 |

|      |       |       |       |       |       |
|------|-------|-------|-------|-------|-------|
| 8616 | 87.58 | 86.43 | 69.09 | 55.38 | 34.57 |
| 8618 | 87.45 | 86.28 | 68.98 | 55.31 | 34.54 |
| 8620 | 87.32 | 86.14 | 68.88 | 55.24 | 34.51 |
| 8622 | 87.13 | 85.94 | 68.72 | 55.12 | 34.45 |
| 8624 | 87.03 | 85.82 | 68.64 | 55.07 | 34.45 |
| 8626 | 86.91 | 85.68 | 68.54 | 55    | 34.43 |
| 8628 | 86.77 | 85.55 | 68.44 | 54.93 | 34.4  |
| 8630 | 86.62 | 85.39 | 68.34 | 54.85 | 34.37 |
| 8632 | 86.48 | 85.23 | 68.2  | 54.75 | 34.32 |
| 8634 | 86.36 | 85.1  | 68.12 | 54.69 | 34.31 |
| 8636 | 86.22 | 84.97 | 68.02 | 54.62 | 34.28 |
| 8638 | 86.08 | 84.81 | 67.9  | 54.55 | 34.25 |
| 8640 | 85.93 | 84.65 | 67.78 | 54.45 | 34.19 |
| 8642 | 85.78 | 84.48 | 67.66 | 54.34 | 34.14 |
| 8644 | 85.63 | 84.32 | 67.54 | 54.27 | 34.12 |
| 8646 | 85.52 | 84.2  | 67.43 | 54.19 | 34.1  |
| 8648 | 85.41 | 84.07 | 67.35 | 54.13 | 34.09 |
| 8650 | 85.24 | 83.89 | 67.2  | 54.01 | 34.02 |
| 8652 | 85.11 | 83.76 | 67.13 | 53.96 | 34.01 |
| 8654 | 85    | 83.64 | 67.01 | 53.9  | 33.99 |
| 8656 | 84.9  | 83.51 | 66.93 | 53.83 | 33.99 |
| 8658 | 84.73 | 83.35 | 66.81 | 53.74 | 33.94 |
| 8660 | 84.59 | 83.21 | 66.69 | 53.64 | 33.89 |
| 8662 | 84.49 | 83.08 | 66.62 | 53.6  | 33.9  |
| 8664 | 84.34 | 82.93 | 66.5  | 53.52 | 33.86 |
| 8666 | 84.22 | 82.8  | 66.4  | 53.45 | 33.82 |
| 8668 | 84.09 | 82.68 | 66.31 | 53.38 | 33.81 |
| 8670 | 83.98 | 82.53 | 66.2  | 53.32 | 33.8  |
| 8672 | 83.85 | 82.4  | 66.11 | 53.23 | 33.77 |
| 8674 | 83.73 | 82.26 | 66.01 | 53.15 | 33.73 |
| 8676 | 83.57 | 82.1  | 65.91 | 53.07 | 33.68 |
| 8678 | 83.45 | 81.95 | 65.78 | 53    | 33.66 |
| 8680 | 83.33 | 81.8  | 65.66 | 52.91 | 33.61 |
| 8682 | 83.21 | 81.68 | 65.57 | 52.84 | 33.58 |
| 8684 | 83.1  | 81.56 | 65.51 | 52.8  | 33.59 |
| 8686 | 82.96 | 81.42 | 65.37 | 52.7  | 33.55 |
| 8688 | 82.84 | 81.28 | 65.27 | 52.62 | 33.49 |
| 8690 | 82.72 | 81.15 | 65.17 | 52.55 | 33.47 |
| 8692 | 82.57 | 80.99 | 65.07 | 52.47 | 33.44 |
| 8694 | 82.44 | 80.87 | 64.95 | 52.38 | 33.42 |
| 8696 | 82.3  | 80.72 | 64.84 | 52.3  | 33.39 |
| 8698 | 82.19 | 80.6  | 64.75 | 52.25 | 33.37 |
| 8700 | 82.05 | 80.46 | 64.65 | 52.16 | 33.32 |
| 8702 | 81.91 | 80.3  | 64.54 | 52.06 | 33.28 |

|      |       |       |       |       |       |
|------|-------|-------|-------|-------|-------|
| 8704 | 81.79 | 80.16 | 64.43 | 51.99 | 33.25 |
| 8706 | 81.67 | 80.03 | 64.33 | 51.91 | 33.22 |
| 8708 | 81.55 | 79.92 | 64.26 | 51.86 | 33.2  |
| 8710 | 81.44 | 79.76 | 64.15 | 51.81 | 33.18 |
| 8712 | 81.31 | 79.62 | 64.04 | 51.72 | 33.14 |
| 8714 | 81.2  | 79.51 | 63.95 | 51.65 | 33.1  |
| 8716 | 81.08 | 79.37 | 63.87 | 51.6  | 33.09 |
| 8718 | 80.99 | 79.27 | 63.79 | 51.57 | 33.08 |
| 8720 | 80.87 | 79.15 | 63.69 | 51.47 | 33.06 |
| 8722 | 80.74 | 79.01 | 63.57 | 51.4  | 33.02 |
| 8724 | 80.61 | 78.86 | 63.48 | 51.34 | 33.01 |
| 8726 | 80.48 | 78.73 | 63.37 | 51.26 | 32.97 |
| 8728 | 80.36 | 78.6  | 63.26 | 51.18 | 32.93 |
| 8730 | 80.24 | 78.47 | 63.18 | 51.1  | 32.9  |
| 8732 | 80.13 | 78.35 | 63.08 | 51.04 | 32.88 |
| 8734 | 80.01 | 78.21 | 62.98 | 50.96 | 32.85 |
| 8736 | 79.89 | 78.08 | 62.89 | 50.89 | 32.82 |
| 8738 | 79.77 | 77.96 | 62.8  | 50.82 | 32.8  |
| 8740 | 79.62 | 77.82 | 62.68 | 50.74 | 32.75 |
| 8742 | 79.53 | 77.7  | 62.61 | 50.68 | 32.75 |
| 8744 | 79.42 | 77.58 | 62.51 | 50.64 | 32.72 |
| 8746 | 79.3  | 77.46 | 62.41 | 50.54 | 32.68 |
| 8748 | 79.18 | 77.34 | 62.33 | 50.48 | 32.66 |
| 8750 | 79.08 | 77.2  | 62.23 | 50.43 | 32.64 |
| 8752 | 78.96 | 77.1  | 62.16 | 50.35 | 32.61 |
| 8754 | 78.85 | 76.97 | 62.06 | 50.28 | 32.58 |
| 8756 | 78.73 | 76.84 | 61.98 | 50.22 | 32.57 |
| 8758 | 78.61 | 76.71 | 61.89 | 50.16 | 32.55 |
| 8760 | 78.49 | 76.58 | 61.76 | 50.06 | 32.52 |
| 8762 | 78.4  | 76.49 | 61.69 | 50.02 | 32.5  |
| 8764 | 78.28 | 76.35 | 61.58 | 49.93 | 32.45 |
| 8766 | 78.13 | 76.2  | 61.45 | 49.84 | 32.41 |
| 8768 | 78.04 | 76.11 | 61.38 | 49.79 | 32.4  |
| 8770 | 77.91 | 75.96 | 61.28 | 49.71 | 32.37 |
| 8772 | 77.78 | 75.82 | 61.18 | 49.64 | 32.33 |
| 8774 | 77.66 | 75.69 | 61.08 | 49.57 | 32.3  |
| 8776 | 77.62 | 75.63 | 61.04 | 49.55 | 32.33 |
| 8778 | 77.52 | 75.52 | 60.96 | 49.49 | 32.32 |
| 8780 | 77.35 | 75.36 | 60.83 | 49.39 | 32.24 |
| 8782 | 77.24 | 75.2  | 60.74 | 49.31 | 32.2  |
| 8784 | 77.14 | 75.09 | 60.64 | 49.25 | 32.18 |
| 8786 | 77.06 | 74.99 | 60.57 | 49.21 | 32.18 |
| 8788 | 76.95 | 74.91 | 60.51 | 49.17 | 32.16 |
| 8790 | 76.85 | 74.78 | 60.43 | 49.12 | 32.15 |

|      |       |       |       |       |       |
|------|-------|-------|-------|-------|-------|
| 8792 | 76.76 | 74.67 | 60.33 | 49.04 | 32.13 |
| 8794 | 76.66 | 74.56 | 60.25 | 48.98 | 32.09 |
| 8796 | 76.52 | 74.44 | 60.17 | 48.91 | 32.06 |
| 8798 | 76.43 | 74.31 | 60.09 | 48.86 | 32.05 |
| 8800 | 76.29 | 74.17 | 59.95 | 48.75 | 32.01 |
| 8802 | 76.21 | 74.07 | 59.88 | 48.71 | 31.99 |
| 8804 | 76.13 | 74    | 59.84 | 48.69 | 32    |
| 8806 | 76    | 73.84 | 59.72 | 48.61 | 31.98 |
| 8808 | 75.89 | 73.72 | 59.63 | 48.52 | 31.92 |
| 8810 | 75.79 | 73.61 | 59.55 | 48.47 | 31.9  |
| 8812 | 75.68 | 73.49 | 59.46 | 48.4  | 31.89 |
| 8814 | 75.57 | 73.37 | 59.36 | 48.32 | 31.84 |
| 8816 | 75.44 | 73.23 | 59.25 | 48.24 | 31.8  |
| 8818 | 75.34 | 73.12 | 59.16 | 48.18 | 31.77 |
| 8820 | 75.24 | 73.01 | 59.08 | 48.12 | 31.75 |
| 8822 | 75.12 | 72.88 | 58.98 | 48.05 | 31.73 |
| 8824 | 75.04 | 72.8  | 58.93 | 48.02 | 31.73 |
| 8826 | 74.92 | 72.67 | 58.82 | 47.94 | 31.68 |
| 8828 | 74.82 | 72.58 | 58.75 | 47.89 | 31.68 |
| 8830 | 74.71 | 72.44 | 58.65 | 47.82 | 31.65 |
| 8832 | 74.6  | 72.33 | 58.56 | 47.77 | 31.62 |
| 8834 | 74.55 | 72.26 | 58.53 | 47.75 | 31.63 |
| 8836 | 74.41 | 72.13 | 58.43 | 47.67 | 31.59 |
| 8838 | 74.32 | 72.02 | 58.33 | 47.61 | 31.58 |
| 8840 | 74.2  | 71.88 | 58.22 | 47.52 | 31.52 |
| 8842 | 74.1  | 71.77 | 58.14 | 47.45 | 31.49 |
| 8844 | 73.99 | 71.65 | 58.05 | 47.4  | 31.48 |
| 8846 | 73.89 | 71.54 | 57.96 | 47.32 | 31.45 |
| 8848 | 73.78 | 71.43 | 57.88 | 47.27 | 31.42 |
| 8850 | 73.67 | 71.31 | 57.79 | 47.19 | 31.38 |
| 8852 | 73.58 | 71.21 | 57.71 | 47.15 | 31.38 |
| 8854 | 73.46 | 71.07 | 57.61 | 47.07 | 31.34 |
| 8856 | 73.37 | 70.98 | 57.55 | 47.03 | 31.32 |
| 8858 | 73.28 | 70.88 | 57.47 | 46.98 | 31.31 |
| 8860 | 73.15 | 70.77 | 57.39 | 46.9  | 31.27 |
| 8862 | 73.08 | 70.67 | 57.32 | 46.86 | 31.26 |
| 8864 | 72.98 | 70.57 | 57.25 | 46.81 | 31.24 |
| 8866 | 72.87 | 70.45 | 57.15 | 46.74 | 31.21 |
| 8868 | 72.77 | 70.35 | 57.08 | 46.7  | 31.2  |
| 8870 | 72.7  | 70.26 | 57.02 | 46.66 | 31.2  |
| 8872 | 72.62 | 70.17 | 56.96 | 46.61 | 31.21 |
| 8874 | 72.55 | 70.08 | 56.89 | 46.57 | 31.18 |
| 8876 | 72.42 | 69.96 | 56.81 | 46.51 | 31.15 |
| 8878 | 72.33 | 69.85 | 56.71 | 46.44 | 31.12 |



|      |       |       |       |       |       |
|------|-------|-------|-------|-------|-------|
| 8880 | 72.21 | 69.72 | 56.6  | 46.34 | 31.06 |
| 8882 | 72.1  | 69.61 | 56.51 | 46.28 | 31.04 |
| 8884 | 72    | 69.5  | 56.45 | 46.23 | 31.03 |
| 8886 | 71.86 | 69.35 | 56.31 | 46.11 | 30.95 |
| 8888 | 71.75 | 69.24 | 56.23 | 46.05 | 30.93 |
| 8890 | 71.7  | 69.17 | 56.19 | 46.02 | 30.93 |
| 8892 | 71.61 | 69.09 | 56.12 | 45.98 | 30.93 |
| 8894 | 71.51 | 68.97 | 56.03 | 45.91 | 30.91 |
| 8896 | 71.42 | 68.87 | 55.95 | 45.87 | 30.89 |
| 8898 | 71.33 | 68.79 | 55.89 | 45.82 | 30.88 |
| 8900 | 71.21 | 68.66 | 55.81 | 45.77 | 30.86 |
| 8902 | 71.11 | 68.54 | 55.7  | 45.7  | 30.82 |
| 8904 | 71.02 | 68.45 | 55.64 | 45.64 | 30.8  |
| 8906 | 70.92 | 68.35 | 55.56 | 45.58 | 30.76 |
| 8908 | 70.86 | 68.27 | 55.51 | 45.56 | 30.79 |
| 8910 | 70.77 | 68.16 | 55.41 | 45.51 | 30.75 |
| 8912 | 70.65 | 68.04 | 55.32 | 45.42 | 30.71 |
| 8914 | 70.58 | 67.97 | 55.26 | 45.39 | 30.7  |
| 8916 | 70.5  | 67.87 | 55.19 | 45.33 | 30.68 |
| 8918 | 70.4  | 67.75 | 55.1  | 45.27 | 30.66 |
| 8920 | 70.31 | 67.65 | 55.03 | 45.22 | 30.64 |
| 8922 | 70.25 | 67.58 | 54.98 | 45.18 | 30.65 |
| 8924 | 70.12 | 67.46 | 54.89 | 45.11 | 30.6  |
| 8926 | 70.03 | 67.34 | 54.8  | 45.03 | 30.58 |
| 8928 | 69.94 | 67.25 | 54.73 | 44.98 | 30.56 |
| 8930 | 69.85 | 67.17 | 54.67 | 44.95 | 30.55 |
| 8932 | 69.73 | 67.06 | 54.6  | 44.88 | 30.52 |
| 8934 | 69.65 | 66.95 | 54.51 | 44.82 | 30.5  |
| 8936 | 69.56 | 66.85 | 54.45 | 44.77 | 30.48 |
| 8938 | 69.47 | 66.76 | 54.36 | 44.7  | 30.44 |
| 8940 | 69.39 | 66.67 | 54.32 | 44.68 | 30.45 |
| 8942 | 69.3  | 66.57 | 54.23 | 44.63 | 30.41 |
| 8944 | 69.24 | 66.51 | 54.19 | 44.61 | 30.42 |
| 8946 | 69.14 | 66.4  | 54.1  | 44.54 | 30.39 |
| 8948 | 69.05 | 66.3  | 54.03 | 44.48 | 30.36 |
| 8950 | 68.94 | 66.19 | 53.94 | 44.42 | 30.34 |
| 8952 | 68.86 | 66.1  | 53.87 | 44.37 | 30.32 |
| 8954 | 68.78 | 66    | 53.79 | 44.32 | 30.3  |
| 8956 | 68.68 | 65.89 | 53.73 | 44.25 | 30.28 |
| 8958 | 68.57 | 65.78 | 53.63 | 44.17 | 30.24 |
| 8960 | 68.49 | 65.7  | 53.57 | 44.13 | 30.24 |
| 8962 | 68.41 | 65.61 | 53.52 | 44.1  | 30.23 |
| 8964 | 68.35 | 65.56 | 53.48 | 44.09 | 30.24 |
| 8966 | 68.26 | 65.43 | 53.37 | 44    | 30.2  |

|      |       |       |       |       |       |
|------|-------|-------|-------|-------|-------|
| 8968 | 68.15 | 65.32 | 53.29 | 43.92 | 30.16 |
| 8970 | 68.07 | 65.24 | 53.21 | 43.87 | 30.13 |
| 8972 | 67.97 | 65.13 | 53.14 | 43.83 | 30.1  |
| 8974 | 67.94 | 65.08 | 53.12 | 43.83 | 30.13 |
| 8976 | 67.83 | 64.96 | 53.02 | 43.76 | 30.09 |
| 8978 | 67.74 | 64.86 | 52.94 | 43.7  | 30.06 |
| 8980 | 67.66 | 64.77 | 52.87 | 43.65 | 30.04 |
| 8982 | 67.56 | 64.67 | 52.79 | 43.59 | 30.02 |
| 8984 | 67.5  | 64.59 | 52.74 | 43.55 | 30.01 |
| 8986 | 67.4  | 64.5  | 52.66 | 43.5  | 29.98 |
| 8988 | 67.31 | 64.41 | 52.59 | 43.45 | 29.96 |
| 8990 | 67.21 | 64.31 | 52.53 | 43.41 | 29.94 |
| 8992 | 67.15 | 64.24 | 52.47 | 43.36 | 29.94 |
| 8994 | 67.05 | 64.13 | 52.37 | 43.29 | 29.9  |
| 8996 | 66.95 | 64.05 | 52.31 | 43.24 | 29.9  |
| 8998 | 66.87 | 63.94 | 52.23 | 43.19 | 29.86 |
| 9000 | 66.79 | 63.86 | 52.16 | 43.13 | 29.84 |
| 9002 | 66.71 | 63.77 | 52.1  | 43.08 | 29.82 |
| 9004 | 66.58 | 63.63 | 51.99 | 43    | 29.77 |
| 9006 | 66.53 | 63.57 | 51.95 | 42.99 | 29.79 |
| 9008 | 66.45 | 63.48 | 51.88 | 42.93 | 29.75 |
| 9010 | 66.4  | 63.41 | 51.84 | 42.9  | 29.75 |
| 9012 | 66.3  | 63.31 | 51.77 | 42.86 | 29.73 |
| 9014 | 66.22 | 63.22 | 51.7  | 42.81 | 29.71 |
| 9016 | 66.14 | 63.13 | 51.63 | 42.76 | 29.69 |
| 9018 | 66.06 | 63.05 | 51.58 | 42.71 | 29.68 |
| 9020 | 66    | 62.99 | 51.52 | 42.66 | 29.66 |
| 9022 | 65.89 | 62.88 | 51.44 | 42.6  | 29.64 |
| 9024 | 65.81 | 62.79 | 51.38 | 42.55 | 29.63 |
| 9026 | 65.72 | 62.7  | 51.3  | 42.5  | 29.59 |
| 9028 | 65.62 | 62.61 | 51.23 | 42.43 | 29.56 |
| 9030 | 65.54 | 62.5  | 51.16 | 42.39 | 29.55 |
| 9032 | 65.48 | 62.43 | 51.1  | 42.35 | 29.54 |
| 9034 | 65.4  | 62.35 | 51.03 | 42.3  | 29.53 |
| 9036 | 65.27 | 62.21 | 50.94 | 42.22 | 29.48 |
| 9038 | 65.22 | 62.16 | 50.88 | 42.19 | 29.47 |
| 9040 | 65.14 | 62.08 | 50.83 | 42.14 | 29.46 |
| 9042 | 65.08 | 62.01 | 50.78 | 42.12 | 29.44 |
| 9044 | 64.97 | 61.89 | 50.68 | 42.05 | 29.39 |
| 9046 | 64.89 | 61.81 | 50.63 | 42.02 | 29.38 |
| 9048 | 64.81 | 61.72 | 50.55 | 41.95 | 29.36 |
| 9050 | 64.75 | 61.65 | 50.51 | 41.93 | 29.36 |
| 9052 | 64.67 | 61.58 | 50.44 | 41.88 | 29.35 |
| 9054 | 64.58 | 61.46 | 50.36 | 41.83 | 29.31 |

|      |       |       |       |       |       |
|------|-------|-------|-------|-------|-------|
| 9056 | 64.49 | 61.36 | 50.29 | 41.77 | 29.29 |
| 9058 | 64.4  | 61.28 | 50.22 | 41.71 | 29.26 |
| 9060 | 64.37 | 61.24 | 50.2  | 41.71 | 29.29 |
| 9062 | 64.29 | 61.14 | 50.13 | 41.66 | 29.26 |
| 9064 | 64.19 | 61.02 | 50.02 | 41.57 | 29.2  |
| 9066 | 64.12 | 60.94 | 49.96 | 41.51 | 29.17 |
| 9068 | 64.05 | 60.9  | 49.94 | 41.51 | 29.19 |
| 9070 | 63.98 | 60.8  | 49.86 | 41.46 | 29.16 |
| 9072 | 63.92 | 60.74 | 49.82 | 41.44 | 29.18 |
| 9074 | 63.85 | 60.66 | 49.76 | 41.4  | 29.16 |
| 9076 | 63.72 | 60.54 | 49.67 | 41.32 | 29.11 |
| 9078 | 63.65 | 60.45 | 49.6  | 41.27 | 29.08 |
| 9080 | 63.56 | 60.36 | 49.54 | 41.22 | 29.06 |
| 9082 | 63.52 | 60.32 | 49.5  | 41.2  | 29.08 |
| 9084 | 63.43 | 60.25 | 49.44 | 41.16 | 29.07 |
| 9086 | 63.35 | 60.14 | 49.37 | 41.11 | 29.04 |
| 9088 | 63.28 | 60.07 | 49.28 | 41.04 | 29    |
| 9090 | 63.23 | 60.01 | 49.25 | 41.04 | 29.02 |
| 9092 | 63.13 | 59.92 | 49.19 | 40.98 | 28.99 |
| 9094 | 63.06 | 59.83 | 49.13 | 40.93 | 28.98 |
| 9096 | 62.99 | 59.76 | 49.07 | 40.89 | 28.98 |
| 9098 | 62.92 | 59.68 | 49.01 | 40.84 | 28.96 |
| 9100 | 62.84 | 59.61 | 48.95 | 40.8  | 28.94 |
| 9102 | 62.74 | 59.5  | 48.87 | 40.73 | 28.9  |
| 9104 | 62.69 | 59.45 | 48.83 | 40.7  | 28.91 |
| 9106 | 62.63 | 59.37 | 48.77 | 40.67 | 28.89 |
| 9108 | 62.55 | 59.29 | 48.72 | 40.63 | 28.88 |
| 9110 | 62.48 | 59.21 | 48.65 | 40.6  | 28.86 |
| 9112 | 62.38 | 59.09 | 48.55 | 40.51 | 28.79 |
| 9114 | 62.34 | 59.04 | 48.53 | 40.51 | 28.81 |
| 9116 | 62.23 | 58.93 | 48.46 | 40.45 | 28.79 |
| 9118 | 62.19 | 58.87 | 48.38 | 40.41 | 28.77 |
| 9120 | 62.13 | 58.81 | 48.36 | 40.39 | 28.78 |
| 9122 | 62.07 | 58.74 | 48.3  | 40.35 | 28.76 |
| 9124 | 61.99 | 58.66 | 48.24 | 40.31 | 28.74 |
| 9126 | 61.92 | 58.58 | 48.18 | 40.27 | 28.74 |
| 9128 | 61.85 | 58.51 | 48.13 | 40.22 | 28.71 |
| 9130 | 61.76 | 58.41 | 48.06 | 40.17 | 28.69 |
| 9132 | 61.7  | 58.35 | 48.02 | 40.14 | 28.69 |
| 9134 | 61.63 | 58.27 | 47.96 | 40.1  | 28.67 |
| 9136 | 61.55 | 58.19 | 47.89 | 40.05 | 28.65 |
| 9138 | 61.49 | 58.12 | 47.84 | 40.02 | 28.64 |
| 9140 | 61.41 | 58.05 | 47.79 | 39.98 | 28.63 |
| 9142 | 61.32 | 57.95 | 47.72 | 39.92 | 28.59 |

|      |       |       |       |       |       |
|------|-------|-------|-------|-------|-------|
| 9144 | 61.27 | 57.89 | 47.67 | 39.87 | 28.59 |
| 9146 | 61.18 | 57.81 | 47.59 | 39.82 | 28.57 |
| 9148 | 61.12 | 57.73 | 47.54 | 39.78 | 28.55 |
| 9150 | 61    | 57.62 | 47.45 | 39.71 | 28.52 |
| 9152 | 60.95 | 57.56 | 47.4  | 39.68 | 28.5  |
| 9154 | 60.89 | 57.49 | 47.36 | 39.66 | 28.51 |
| 9156 | 60.83 | 57.45 | 47.33 | 39.63 | 28.51 |
| 9158 | 60.78 | 57.37 | 47.27 | 39.59 | 28.49 |
| 9160 | 60.68 | 57.25 | 47.18 | 39.52 | 28.43 |
| 9162 | 60.62 | 57.2  | 47.13 | 39.49 | 28.42 |
| 9164 | 60.56 | 57.14 | 47.09 | 39.47 | 28.43 |
| 9166 | 60.49 | 57.07 | 47.03 | 39.42 | 28.4  |
| 9168 | 60.44 | 57.01 | 47    | 39.39 | 28.41 |
| 9170 | 60.38 | 56.94 | 46.96 | 39.37 | 28.39 |
| 9172 | 60.29 | 56.85 | 46.89 | 39.32 | 28.37 |
| 9174 | 60.21 | 56.76 | 46.81 | 39.27 | 28.34 |
| 9176 | 60.11 | 56.65 | 46.71 | 39.17 | 28.29 |
| 9178 | 60.05 | 56.6  | 46.68 | 39.14 | 28.29 |
| 9180 | 59.96 | 56.51 | 46.61 | 39.09 | 28.26 |
| 9182 | 59.88 | 56.43 | 46.54 | 39.05 | 28.24 |
| 9184 | 59.88 | 56.41 | 46.55 | 39.07 | 28.29 |
| 9186 | 59.78 | 56.31 | 46.46 | 39    | 28.25 |
| 9188 | 59.74 | 56.26 | 46.43 | 38.98 | 28.25 |
| 9190 | 59.62 | 56.14 | 46.32 | 38.89 | 28.19 |
| 9192 | 59.56 | 56.07 | 46.27 | 38.84 | 28.17 |
| 9194 | 59.52 | 56.02 | 46.25 | 38.84 | 28.19 |
| 9196 | 59.48 | 55.97 | 46.21 | 38.82 | 28.18 |
| 9198 | 59.39 | 55.87 | 46.14 | 38.77 | 28.14 |
| 9200 | 59.33 | 55.82 | 46.09 | 38.73 | 28.14 |
| 9202 | 59.24 | 55.73 | 46.02 | 38.69 | 28.11 |
| 9204 | 59.16 | 55.65 | 45.96 | 38.64 | 28.09 |
| 9206 | 59.12 | 55.6  | 45.91 | 38.63 | 28.09 |
| 9208 | 59.06 | 55.54 | 45.86 | 38.58 | 28.07 |
| 9210 | 58.97 | 55.44 | 45.8  | 38.52 | 28.04 |
| 9212 | 58.91 | 55.37 | 45.76 | 38.5  | 28.05 |
| 9214 | 58.84 | 55.29 | 45.68 | 38.44 | 28.04 |
| 9216 | 58.8  | 55.26 | 45.67 | 38.43 | 28.03 |
| 9218 | 58.73 | 55.19 | 45.61 | 38.38 | 28.01 |
| 9220 | 58.64 | 55.12 | 45.55 | 38.34 | 27.99 |
| 9222 | 58.54 | 55    | 45.45 | 38.26 | 27.94 |
| 9224 | 58.48 | 54.94 | 45.41 | 38.24 | 27.93 |
| 9226 | 58.42 | 54.87 | 45.36 | 38.2  | 27.93 |
| 9228 | 58.36 | 54.81 | 45.31 | 38.16 | 27.91 |
| 9230 | 58.3  | 54.75 | 45.27 | 38.12 | 27.9  |

|      |       |       |       |       |       |
|------|-------|-------|-------|-------|-------|
| 9232 | 58.27 | 54.71 | 45.26 | 38.13 | 27.91 |
| 9234 | 58.21 | 54.64 | 45.2  | 38.08 | 27.89 |
| 9236 | 58.12 | 54.57 | 45.13 | 38.05 | 27.86 |
| 9238 | 58.05 | 54.47 | 45.07 | 38    | 27.84 |
| 9240 | 58.03 | 54.45 | 45.06 | 38    | 27.87 |
| 9242 | 57.94 | 54.37 | 44.98 | 37.95 | 27.83 |
| 9244 | 57.89 | 54.31 | 44.94 | 37.93 | 27.83 |
| 9246 | 57.8  | 54.22 | 44.86 | 37.87 | 27.8  |
| 9248 | 57.74 | 54.14 | 44.8  | 37.81 | 27.77 |
| 9250 | 57.67 | 54.08 | 44.75 | 37.77 | 27.75 |
| 9252 | 57.61 | 54.03 | 44.71 | 37.74 | 27.75 |
| 9254 | 57.55 | 53.95 | 44.66 | 37.71 | 27.76 |
| 9256 | 57.48 | 53.87 | 44.59 | 37.64 | 27.71 |
| 9258 | 57.47 | 53.84 | 44.58 | 37.65 | 27.74 |
| 9260 | 57.35 | 53.74 | 44.5  | 37.58 | 27.69 |
| 9262 | 57.34 | 53.73 | 44.5  | 37.59 | 27.72 |
| 9264 | 57.25 | 53.63 | 44.4  | 37.51 | 27.68 |
| 9266 | 57.2  | 53.58 | 44.38 | 37.49 | 27.68 |
| 9268 | 57.14 | 53.52 | 44.34 | 37.47 | 27.68 |
| 9270 | 57.07 | 53.42 | 44.28 | 37.42 | 27.64 |
| 9272 | 57.04 | 53.4  | 44.25 | 37.42 | 27.66 |
| 9274 | 56.96 | 53.3  | 44.17 | 37.35 | 27.6  |
| 9276 | 56.91 | 53.26 | 44.15 | 37.36 | 27.62 |
| 9278 | 56.82 | 53.16 | 44.06 | 37.29 | 27.59 |
| 9280 | 56.75 | 53.08 | 44    | 37.23 | 27.56 |
| 9282 | 56.7  | 53.04 | 43.97 | 37.22 | 27.56 |
| 9284 | 56.63 | 52.97 | 43.91 | 37.18 | 27.52 |
| 9286 | 56.57 | 52.89 | 43.84 | 37.15 | 27.52 |
| 9288 | 56.5  | 52.83 | 43.8  | 37.08 | 27.49 |
| 9290 | 56.45 | 52.78 | 43.77 | 37.07 | 27.51 |
| 9292 | 56.42 | 52.74 | 43.75 | 37.06 | 27.52 |
| 9294 | 56.33 | 52.65 | 43.66 | 36.98 | 27.48 |
| 9296 | 56.25 | 52.58 | 43.6  | 36.93 | 27.44 |
| 9298 | 56.19 | 52.51 | 43.56 | 36.91 | 27.43 |
| 9300 | 56.13 | 52.45 | 43.52 | 36.87 | 27.42 |
| 9302 | 56.07 | 52.38 | 43.46 | 36.83 | 27.41 |
| 9304 | 56.01 | 52.32 | 43.41 | 36.8  | 27.39 |
| 9306 | 55.96 | 52.28 | 43.38 | 36.78 | 27.39 |
| 9308 | 55.9  | 52.22 | 43.34 | 36.76 | 27.37 |
| 9310 | 55.84 | 52.14 | 43.28 | 36.72 | 27.36 |
| 9312 | 55.78 | 52.08 | 43.23 | 36.69 | 27.34 |
| 9314 | 55.73 | 52.01 | 43.19 | 36.65 | 27.34 |
| 9316 | 55.65 | 51.95 | 43.14 | 36.62 | 27.31 |
| 9318 | 55.6  | 51.88 | 43.07 | 36.58 | 27.29 |

|      |       |       |       |       |       |
|------|-------|-------|-------|-------|-------|
| 9320 | 55.56 | 51.83 | 43.05 | 36.56 | 27.29 |
| 9322 | 55.49 | 51.77 | 43    | 36.53 | 27.27 |
| 9324 | 55.42 | 51.71 | 42.95 | 36.49 | 27.26 |
| 9326 | 55.38 | 51.67 | 42.91 | 36.45 | 27.28 |
| 9328 | 55.33 | 51.62 | 42.87 | 36.42 | 27.27 |
| 9330 | 55.28 | 51.57 | 42.85 | 36.41 | 27.27 |
| 9332 | 55.22 | 51.5  | 42.8  | 36.37 | 27.25 |
| 9334 | 55.16 | 51.44 | 42.75 | 36.33 | 27.25 |
| 9336 | 55.07 | 51.36 | 42.67 | 36.27 | 27.2  |
| 9338 | 55.01 | 51.29 | 42.61 | 36.24 | 27.17 |
| 9340 | 54.95 | 51.24 | 42.58 | 36.21 | 27.16 |
| 9342 | 54.9  | 51.18 | 42.53 | 36.17 | 27.15 |
| 9344 | 54.84 | 51.12 | 42.49 | 36.14 | 27.14 |
| 9346 | 54.81 | 51.07 | 42.46 | 36.12 | 27.14 |
| 9348 | 54.74 | 51.03 | 42.42 | 36.1  | 27.13 |
| 9350 | 54.68 | 50.94 | 42.35 | 36.04 | 27.11 |
| 9352 | 54.62 | 50.88 | 42.31 | 36.01 | 27.09 |
| 9354 | 54.57 | 50.83 | 42.28 | 35.99 | 27.09 |
| 9356 | 54.51 | 50.77 | 42.22 | 35.95 | 27.07 |
| 9358 | 54.45 | 50.71 | 42.17 | 35.92 | 27.06 |
| 9360 | 54.4  | 50.65 | 42.13 | 35.89 | 27.05 |
| 9362 | 54.35 | 50.59 | 42.09 | 35.86 | 27.03 |
| 9364 | 54.28 | 50.53 | 42.03 | 35.81 | 27    |
| 9366 | 54.24 | 50.47 | 41.99 | 35.79 | 27    |
| 9368 | 54.16 | 50.4  | 41.94 | 35.75 | 26.97 |
| 9370 | 54.12 | 50.35 | 41.89 | 35.71 | 26.96 |
| 9372 | 54.08 | 50.3  | 41.86 | 35.71 | 26.97 |
| 9374 | 54.03 | 50.24 | 41.81 | 35.67 | 26.96 |
| 9376 | 53.98 | 50.19 | 41.78 | 35.65 | 26.95 |
| 9378 | 53.93 | 50.13 | 41.74 | 35.63 | 26.93 |
| 9380 | 53.88 | 50.08 | 41.7  | 35.6  | 26.92 |
| 9382 | 53.78 | 49.99 | 41.64 | 35.54 | 26.88 |
| 9384 | 53.76 | 49.95 | 41.61 | 35.53 | 26.89 |
| 9386 | 53.69 | 49.89 | 41.56 | 35.48 | 26.85 |
| 9388 | 53.65 | 49.84 | 41.53 | 35.47 | 26.86 |
| 9390 | 53.6  | 49.79 | 41.48 | 35.44 | 26.86 |
| 9392 | 53.56 | 49.74 | 41.45 | 35.42 | 26.86 |
| 9394 | 53.5  | 49.68 | 41.4  | 35.39 | 26.83 |
| 9396 | 53.43 | 49.63 | 41.35 | 35.36 | 26.82 |
| 9398 | 53.37 | 49.55 | 41.29 | 35.31 | 26.79 |
| 9400 | 53.32 | 49.51 | 41.27 | 35.29 | 26.78 |
| 9402 | 53.28 | 49.46 | 41.23 | 35.26 | 26.78 |
| 9404 | 53.25 | 49.44 | 41.22 | 35.26 | 26.8  |
| 9406 | 53.18 | 49.36 | 41.16 | 35.22 | 26.79 |

|      |       |       |       |       |       |
|------|-------|-------|-------|-------|-------|
| 9408 | 53.1  | 49.28 | 41.09 | 35.15 | 26.73 |
| 9410 | 53.03 | 49.22 | 41.05 | 35.13 | 26.71 |
| 9412 | 53    | 49.18 | 41.02 | 35.11 | 26.72 |
| 9414 | 52.95 | 49.12 | 40.98 | 35.08 | 26.71 |
| 9416 | 52.88 | 49.05 | 40.92 | 35.03 | 26.69 |
| 9418 | 52.84 | 49.01 | 40.89 | 35.02 | 26.69 |
| 9420 | 52.79 | 48.96 | 40.85 | 34.99 | 26.68 |
| 9422 | 52.74 | 48.9  | 40.82 | 34.96 | 26.66 |
| 9424 | 52.69 | 48.85 | 40.78 | 34.93 | 26.65 |
| 9426 | 52.64 | 48.8  | 40.73 | 34.89 | 26.64 |
| 9428 | 52.57 | 48.74 | 40.69 | 34.86 | 26.62 |
| 9430 | 52.5  | 48.68 | 40.63 | 34.81 | 26.6  |
| 9432 | 52.49 | 48.65 | 40.61 | 34.8  | 26.62 |
| 9434 | 52.42 | 48.58 | 40.56 | 34.77 | 26.6  |
| 9436 | 52.37 | 48.52 | 40.52 | 34.73 | 26.58 |
| 9438 | 52.32 | 48.48 | 40.48 | 34.71 | 26.58 |
| 9440 | 52.25 | 48.42 | 40.43 | 34.67 | 26.56 |
| 9442 | 52.21 | 48.36 | 40.39 | 34.64 | 26.55 |
| 9444 | 52.15 | 48.3  | 40.35 | 34.63 | 26.53 |
| 9446 | 52.09 | 48.24 | 40.31 | 34.59 | 26.51 |
| 9448 | 52.06 | 48.2  | 40.28 | 34.58 | 26.51 |
| 9450 | 52.02 | 48.16 | 40.24 | 34.55 | 26.5  |
| 9452 | 51.96 | 48.1  | 40.2  | 34.52 | 26.49 |
| 9454 | 51.91 | 48.04 | 40.16 | 34.49 | 26.48 |
| 9456 | 51.86 | 47.99 | 40.13 | 34.46 | 26.47 |
| 9458 | 51.81 | 47.95 | 40.09 | 34.43 | 26.45 |
| 9460 | 51.78 | 47.91 | 40.07 | 34.42 | 26.46 |
| 9462 | 51.72 | 47.85 | 40    | 34.37 | 26.45 |
| 9464 | 51.65 | 47.79 | 39.95 | 34.32 | 26.42 |
| 9466 | 51.6  | 47.73 | 39.91 | 34.3  | 26.4  |
| 9468 | 51.55 | 47.68 | 39.87 | 34.27 | 26.4  |
| 9470 | 51.5  | 47.63 | 39.83 | 34.24 | 26.4  |
| 9472 | 51.45 | 47.58 | 39.79 | 34.21 | 26.38 |
| 9474 | 51.41 | 47.53 | 39.75 | 34.18 | 26.36 |
| 9476 | 51.33 | 47.45 | 39.69 | 34.13 | 26.32 |
| 9478 | 51.31 | 47.41 | 39.66 | 34.13 | 26.33 |
| 9480 | 51.27 | 47.37 | 39.63 | 34.11 | 26.32 |
| 9482 | 51.22 | 47.34 | 39.61 | 34.1  | 26.33 |
| 9484 | 51.18 | 47.29 | 39.58 | 34.07 | 26.32 |
| 9486 | 51.13 | 47.24 | 39.54 | 34.05 | 26.3  |
| 9488 | 51.08 | 47.2  | 39.5  | 34.03 | 26.3  |
| 9490 | 51.04 | 47.15 | 39.46 | 33.99 | 26.28 |
| 9492 | 50.98 | 47.1  | 39.42 | 33.96 | 26.27 |
| 9494 | 50.93 | 47.04 | 39.38 | 33.94 | 26.26 |

|      |       |       |       |       |       |
|------|-------|-------|-------|-------|-------|
| 9496 | 50.88 | 46.99 | 39.34 | 33.9  | 26.25 |
| 9498 | 50.84 | 46.94 | 39.3  | 33.87 | 26.24 |
| 9500 | 50.77 | 46.88 | 39.26 | 33.83 | 26.23 |
| 9502 | 50.73 | 46.83 | 39.21 | 33.8  | 26.21 |
| 9504 | 50.68 | 46.79 | 39.18 | 33.77 | 26.21 |
| 9506 | 50.63 | 46.74 | 39.15 | 33.74 | 26.19 |
| 9508 | 50.53 | 46.65 | 39.07 | 33.68 | 26.14 |
| 9510 | 50.51 | 46.62 | 39.07 | 33.68 | 26.17 |
| 9512 | 50.47 | 46.58 | 39.02 | 33.65 | 26.14 |
| 9514 | 50.44 | 46.54 | 39    | 33.64 | 26.15 |
| 9516 | 50.4  | 46.5  | 38.98 | 33.63 | 26.14 |
| 9518 | 50.33 | 46.43 | 38.92 | 33.59 | 26.13 |
| 9520 | 50.3  | 46.4  | 38.89 | 33.57 | 26.13 |
| 9522 | 50.29 | 46.39 | 38.88 | 33.58 | 26.13 |
| 9524 | 50.22 | 46.32 | 38.83 | 33.53 | 26.11 |
| 9526 | 50.14 | 46.23 | 38.76 | 33.49 | 26.07 |
| 9528 | 50.11 | 46.19 | 38.73 | 33.45 | 26.06 |
| 9530 | 50.02 | 46.11 | 38.65 | 33.38 | 26.02 |
| 9532 | 50.01 | 46.1  | 38.66 | 33.39 | 26.05 |
| 9534 | 49.96 | 46.06 | 38.63 | 33.37 | 26.05 |
| 9536 | 49.91 | 46.01 | 38.58 | 33.33 | 26.02 |
| 9538 | 49.87 | 45.97 | 38.56 | 33.31 | 26.03 |
| 9540 | 49.81 | 45.92 | 38.52 | 33.28 | 26.03 |
| 9542 | 49.77 | 45.86 | 38.47 | 33.26 | 26.01 |
| 9544 | 49.74 | 45.84 | 38.46 | 33.25 | 26    |
| 9546 | 49.7  | 45.79 | 38.43 | 33.23 | 25.99 |
| 9548 | 49.65 | 45.73 | 38.4  | 33.21 | 25.98 |
| 9550 | 49.6  | 45.68 | 38.35 | 33.18 | 25.98 |
| 9552 | 49.56 | 45.64 | 38.33 | 33.17 | 25.98 |
| 9554 | 49.55 | 45.63 | 38.33 | 33.18 | 26    |
| 9556 | 49.49 | 45.58 | 38.27 | 33.13 | 25.97 |
| 9558 | 49.42 | 45.5  | 38.22 | 33.08 | 25.93 |
| 9560 | 49.39 | 45.47 | 38.19 | 33.07 | 25.94 |
| 9562 | 49.33 | 45.41 | 38.14 | 33.03 | 25.91 |
| 9564 | 49.26 | 45.36 | 38.1  | 32.98 | 25.89 |
| 9566 | 49.2  | 45.28 | 38.05 | 32.94 | 25.88 |
| 9568 | 49.17 | 45.26 | 38.02 | 32.93 | 25.88 |
| 9570 | 49.12 | 45.21 | 37.99 | 32.9  | 25.87 |
| 9572 | 49.1  | 45.18 | 37.96 | 32.89 | 25.87 |
| 9574 | 49.04 | 45.13 | 37.92 | 32.86 | 25.86 |
| 9576 | 48.98 | 45.06 | 37.87 | 32.8  | 25.83 |
| 9578 | 48.94 | 45.02 | 37.84 | 32.78 | 25.82 |
| 9580 | 48.88 | 44.96 | 37.78 | 32.74 | 25.78 |
| 9582 | 48.84 | 44.91 | 37.77 | 32.74 | 25.78 |



|      |       |       |       |       |       |
|------|-------|-------|-------|-------|-------|
| 9584 | 48.81 | 44.87 | 37.74 | 32.73 | 25.77 |
| 9586 | 48.74 | 44.81 | 37.67 | 32.67 | 25.75 |
| 9588 | 48.67 | 44.76 | 37.63 | 32.64 | 25.73 |
| 9590 | 48.64 | 44.72 | 37.61 | 32.63 | 25.73 |
| 9592 | 48.61 | 44.68 | 37.58 | 32.62 | 25.73 |
| 9594 | 48.55 | 44.62 | 37.53 | 32.57 | 25.7  |
| 9596 | 48.51 | 44.59 | 37.5  | 32.56 | 25.71 |
| 9598 | 48.48 | 44.56 | 37.49 | 32.54 | 25.71 |
| 9600 | 48.45 | 44.53 | 37.46 | 32.53 | 25.73 |
| 9602 | 48.39 | 44.47 | 37.43 | 32.5  | 25.7  |
| 9604 | 48.34 | 44.43 | 37.4  | 32.47 | 25.69 |
| 9606 | 48.33 | 44.41 | 37.38 | 32.47 | 25.7  |
| 9608 | 48.27 | 44.36 | 37.34 | 32.43 | 25.68 |
| 9610 | 48.22 | 44.3  | 37.29 | 32.38 | 25.67 |
| 9612 | 48.18 | 44.27 | 37.27 | 32.39 | 25.67 |
| 9614 | 48.15 | 44.23 | 37.24 | 32.37 | 25.66 |
| 9616 | 48.07 | 44.14 | 37.16 | 32.3  | 25.6  |
| 9618 | 48.03 | 44.11 | 37.15 | 32.3  | 25.6  |
| 9620 | 48.01 | 44.09 | 37.14 | 32.3  | 25.62 |
| 9622 | 47.99 | 44.07 | 37.12 | 32.3  | 25.63 |
| 9624 | 47.96 | 44.02 | 37.09 | 32.27 | 25.62 |
| 9626 | 47.91 | 43.98 | 37.05 | 32.25 | 25.61 |
| 9628 | 47.87 | 43.94 | 37.03 | 32.23 | 25.6  |
| 9630 | 47.83 | 43.89 | 36.99 | 32.21 | 25.6  |
| 9632 | 47.76 | 43.81 | 36.92 | 32.16 | 25.55 |
| 9634 | 47.72 | 43.78 | 36.89 | 32.13 | 25.53 |
| 9636 | 47.69 | 43.75 | 36.88 | 32.13 | 25.55 |
| 9638 | 47.65 | 43.71 | 36.84 | 32.09 | 25.54 |
| 9640 | 47.62 | 43.68 | 36.82 | 32.08 | 25.54 |
| 9642 | 47.58 | 43.63 | 36.79 | 32.05 | 25.53 |
| 9644 | 47.53 | 43.59 | 36.76 | 32.03 | 25.53 |
| 9646 | 47.49 | 43.54 | 36.72 | 32    | 25.52 |
| 9648 | 47.44 | 43.5  | 36.69 | 31.98 | 25.51 |
| 9650 | 47.39 | 43.45 | 36.65 | 31.93 | 25.5  |
| 9652 | 47.32 | 43.38 | 36.6  | 31.89 | 25.47 |
| 9654 | 47.3  | 43.36 | 36.58 | 31.9  | 25.47 |
| 9656 | 47.25 | 43.31 | 36.54 | 31.86 | 25.46 |
| 9658 | 47.23 | 43.28 | 36.53 | 31.86 | 25.46 |
| 9660 | 47.19 | 43.25 | 36.5  | 31.83 | 25.45 |
| 9662 | 47.16 | 43.22 | 36.48 | 31.82 | 25.45 |
| 9664 | 47.09 | 43.14 | 36.41 | 31.77 | 25.41 |
| 9666 | 47.02 | 43.08 | 36.37 | 31.75 | 25.38 |
| 9668 | 47.03 | 43.09 | 36.38 | 31.77 | 25.41 |
| 9670 | 46.96 | 43.02 | 36.32 | 31.71 | 25.37 |

|      |       |       |       |       |       |
|------|-------|-------|-------|-------|-------|
| 9672 | 46.95 | 42.99 | 36.3  | 31.7  | 25.38 |
| 9674 | 46.89 | 42.92 | 36.25 | 31.66 | 25.36 |
| 9676 | 46.83 | 42.88 | 36.21 | 31.63 | 25.33 |
| 9678 | 46.83 | 42.87 | 36.2  | 31.64 | 25.36 |
| 9680 | 46.8  | 42.84 | 36.19 | 31.62 | 25.37 |
| 9682 | 46.76 | 42.8  | 36.15 | 31.59 | 25.36 |
| 9684 | 46.71 | 42.76 | 36.13 | 31.57 | 25.35 |
| 9686 | 46.67 | 42.72 | 36.09 | 31.56 | 25.34 |
| 9688 | 46.63 | 42.68 | 36.07 | 31.53 | 25.34 |
| 9690 | 46.57 | 42.62 | 36.02 | 31.49 | 25.31 |
| 9692 | 46.54 | 42.6  | 36.01 | 31.48 | 25.32 |
| 9694 | 46.5  | 42.55 | 35.97 | 31.44 | 25.29 |
| 9696 | 46.49 | 42.54 | 35.96 | 31.47 | 25.31 |
| 9698 | 46.47 | 42.52 | 35.95 | 31.46 | 25.32 |
| 9700 | 46.42 | 42.49 | 35.95 | 31.46 | 25.34 |
| 9702 | 46.36 | 42.41 | 35.87 | 31.4  | 25.28 |
| 9704 | 46.29 | 42.35 | 35.81 | 31.34 | 25.25 |
| 9706 | 46.23 | 42.28 | 35.75 | 31.3  | 25.2  |
| 9708 | 46.18 | 42.23 | 35.72 | 31.28 | 25.19 |
| 9710 | 46.15 | 42.19 | 35.69 | 31.26 | 25.18 |
| 9712 | 46.1  | 42.15 | 35.66 | 31.24 | 25.17 |
| 9714 | 46.07 | 42.13 | 35.65 | 31.23 | 25.18 |
| 9716 | 46.04 | 42.09 | 35.62 | 31.21 | 25.18 |
| 9718 | 46.01 | 42.06 | 35.6  | 31.2  | 25.18 |
| 9720 | 45.98 | 42.03 | 35.57 | 31.18 | 25.18 |
| 9722 | 45.94 | 42    | 35.53 | 31.14 | 25.15 |
| 9724 | 45.88 | 41.95 | 35.52 | 31.12 | 25.15 |
| 9726 | 45.83 | 41.88 | 35.46 | 31.07 | 25.13 |
| 9728 | 45.78 | 41.84 | 35.42 | 31.04 | 25.11 |
| 9730 | 45.75 | 41.8  | 35.39 | 31.02 | 25.1  |
| 9732 | 45.72 | 41.77 | 35.38 | 31.02 | 25.11 |
| 9734 | 45.67 | 41.73 | 35.33 | 30.99 | 25.09 |
| 9736 | 45.63 | 41.69 | 35.3  | 30.97 | 25.08 |
| 9738 | 45.59 | 41.66 | 35.28 | 30.95 | 25.07 |
| 9740 | 45.55 | 41.62 | 35.25 | 30.92 | 25.06 |
| 9742 | 45.54 | 41.6  | 35.24 | 30.93 | 25.09 |
| 9744 | 45.54 | 41.59 | 35.24 | 30.94 | 25.11 |
| 9746 | 45.48 | 41.53 | 35.19 | 30.9  | 25.07 |
| 9748 | 45.43 | 41.49 | 35.15 | 30.87 | 25.05 |
| 9750 | 45.39 | 41.44 | 35.12 | 30.86 | 25.04 |
| 9752 | 45.36 | 41.41 | 35.1  | 30.84 | 25.04 |
| 9754 | 45.33 | 41.4  | 35.1  | 30.84 | 25.05 |
| 9756 | 45.29 | 41.35 | 35.06 | 30.81 | 25.04 |
| 9758 | 45.26 | 41.32 | 35.04 | 30.79 | 25.03 |

|      |       |       |       |       |       |
|------|-------|-------|-------|-------|-------|
| 9760 | 45.23 | 41.29 | 35.02 | 30.78 | 25.03 |
| 9762 | 45.15 | 41.21 | 34.94 | 30.71 | 24.99 |
| 9764 | 45.1  | 41.17 | 34.91 | 30.69 | 24.97 |
| 9766 | 45.07 | 41.15 | 34.9  | 30.69 | 24.97 |
| 9768 | 45.04 | 41.11 | 34.87 | 30.67 | 24.98 |
| 9770 | 45    | 41.07 | 34.83 | 30.64 | 24.94 |
| 9772 | 44.95 | 41.03 | 34.8  | 30.61 | 24.94 |
| 9774 | 44.93 | 41    | 34.79 | 30.61 | 24.95 |
| 9776 | 44.9  | 40.98 | 34.78 | 30.6  | 24.94 |
| 9778 | 44.86 | 40.92 | 34.74 | 30.57 | 24.91 |
| 9780 | 44.82 | 40.88 | 34.71 | 30.55 | 24.9  |
| 9782 | 44.82 | 40.89 | 34.71 | 30.57 | 24.93 |
| 9784 | 44.79 | 40.85 | 34.68 | 30.54 | 24.93 |
| 9786 | 44.72 | 40.78 | 34.63 | 30.5  | 24.88 |
| 9788 | 44.72 | 40.78 | 34.64 | 30.52 | 24.9  |
| 9790 | 44.63 | 40.72 | 34.58 | 30.47 | 24.88 |
| 9792 | 44.61 | 40.68 | 34.55 | 30.44 | 24.88 |
| 9794 | 44.56 | 40.64 | 34.51 | 30.41 | 24.87 |
| 9796 | 44.57 | 40.64 | 34.53 | 30.43 | 24.89 |
| 9798 | 44.5  | 40.58 | 34.49 | 30.4  | 24.87 |
| 9800 | 44.5  | 40.58 | 34.48 | 30.4  | 24.89 |
| 9802 | 44.47 | 40.55 | 34.46 | 30.38 | 24.88 |
| 9804 | 44.43 | 40.51 | 34.43 | 30.36 | 24.87 |
| 9806 | 44.4  | 40.48 | 34.41 | 30.33 | 24.86 |
| 9808 | 44.36 | 40.44 | 34.38 | 30.32 | 24.85 |
| 9810 | 44.31 | 40.4  | 34.34 | 30.28 | 24.81 |
| 9812 | 44.27 | 40.36 | 34.31 | 30.27 | 24.81 |
| 9814 | 44.2  | 40.28 | 34.25 | 30.22 | 24.77 |
| 9816 | 44.2  | 40.29 | 34.27 | 30.24 | 24.79 |
| 9818 | 44.16 | 40.23 | 34.23 | 30.21 | 24.79 |
| 9820 | 44.1  | 40.19 | 34.18 | 30.18 | 24.75 |
| 9822 | 44.09 | 40.17 | 34.16 | 30.17 | 24.75 |
| 9824 | 44.09 | 40.15 | 34.16 | 30.17 | 24.77 |
| 9826 | 44    | 40.07 | 34.08 | 30.1  | 24.73 |
| 9828 | 43.94 | 40.04 | 34.05 | 30.07 | 24.71 |
| 9830 | 43.9  | 40.01 | 34.03 | 30.06 | 24.71 |
| 9832 | 43.92 | 40.02 | 34.06 | 30.08 | 24.74 |
| 9834 | 43.89 | 39.99 | 34.03 | 30.07 | 24.74 |
| 9836 | 43.84 | 39.94 | 33.99 | 30.03 | 24.71 |
| 9838 | 43.81 | 39.9  | 33.95 | 30    | 24.69 |
| 9840 | 43.73 | 39.83 | 33.9  | 29.95 | 24.67 |
| 9842 | 43.71 | 39.81 | 33.89 | 29.96 | 24.67 |
| 9844 | 43.72 | 39.82 | 33.91 | 29.98 | 24.71 |
| 9846 | 43.65 | 39.74 | 33.84 | 29.94 | 24.66 |

|      |       |       |       |       |       |
|------|-------|-------|-------|-------|-------|
| 9848 | 43.66 | 39.75 | 33.86 | 29.95 | 24.69 |
| 9850 | 43.62 | 39.72 | 33.83 | 29.94 | 24.67 |
| 9852 | 43.58 | 39.67 | 33.8  | 29.92 | 24.67 |
| 9854 | 43.52 | 39.62 | 33.74 | 29.88 | 24.64 |
| 9856 | 43.48 | 39.57 | 33.71 | 29.83 | 24.62 |
| 9858 | 43.45 | 39.55 | 33.68 | 29.83 | 24.63 |
| 9860 | 43.4  | 39.51 | 33.66 | 29.8  | 24.6  |
| 9862 | 43.39 | 39.49 | 33.65 | 29.81 | 24.6  |
| 9864 | 43.38 | 39.49 | 33.65 | 29.81 | 24.64 |
| 9866 | 43.35 | 39.46 | 33.62 | 29.79 | 24.64 |
| 9868 | 43.31 | 39.42 | 33.6  | 29.76 | 24.63 |
| 9870 | 43.26 | 39.38 | 33.58 | 29.75 | 24.62 |
| 9872 | 43.21 | 39.32 | 33.51 | 29.69 | 24.56 |
| 9874 | 43.15 | 39.27 | 33.47 | 29.66 | 24.54 |
| 9876 | 43.11 | 39.23 | 33.44 | 29.63 | 24.54 |
| 9878 | 43.1  | 39.22 | 33.43 | 29.63 | 24.54 |
| 9880 | 43.08 | 39.2  | 33.41 | 29.62 | 24.54 |
| 9882 | 43.02 | 39.14 | 33.37 | 29.58 | 24.51 |
| 9884 | 42.99 | 39.11 | 33.35 | 29.57 | 24.5  |
| 9886 | 42.96 | 39.08 | 33.33 | 29.55 | 24.5  |
| 9888 | 42.92 | 39.05 | 33.3  | 29.54 | 24.49 |
| 9890 | 42.92 | 39.06 | 33.32 | 29.55 | 24.51 |
| 9892 | 42.92 | 39.05 | 33.31 | 29.56 | 24.53 |
| 9894 | 42.85 | 38.97 | 33.27 | 29.52 | 24.5  |
| 9896 | 42.79 | 38.92 | 33.2  | 29.47 | 24.46 |
| 9898 | 42.78 | 38.9  | 33.18 | 29.46 | 24.47 |
| 9900 | 42.74 | 38.88 | 33.18 | 29.45 | 24.49 |
| 9902 | 42.73 | 38.87 | 33.17 | 29.44 | 24.5  |
| 9904 | 42.66 | 38.79 | 33.1  | 29.39 | 24.45 |
| 9906 | 42.65 | 38.79 | 33.09 | 29.39 | 24.45 |
| 9908 | 42.6  | 38.75 | 33.07 | 29.37 | 24.44 |
| 9910 | 42.55 | 38.69 | 33.02 | 29.34 | 24.42 |
| 9912 | 42.52 | 38.66 | 33    | 29.31 | 24.41 |
| 9914 | 42.49 | 38.63 | 32.97 | 29.3  | 24.4  |
| 9916 | 42.46 | 38.6  | 32.96 | 29.28 | 24.4  |
| 9918 | 42.44 | 38.57 | 32.94 | 29.28 | 24.4  |
| 9920 | 42.39 | 38.53 | 32.9  | 29.27 | 24.38 |
| 9922 | 42.38 | 38.52 | 32.89 | 29.26 | 24.38 |
| 9924 | 42.35 | 38.48 | 32.87 | 29.24 | 24.38 |
| 9926 | 42.32 | 38.46 | 32.86 | 29.24 | 24.4  |
| 9928 | 42.3  | 38.44 | 32.85 | 29.24 | 24.39 |
| 9930 | 42.26 | 38.4  | 32.82 | 29.2  | 24.37 |
| 9932 | 42.27 | 38.42 | 32.84 | 29.22 | 24.41 |
| 9934 | 42.2  | 38.37 | 32.79 | 29.17 | 24.39 |

|       |       |       |       |       |       |
|-------|-------|-------|-------|-------|-------|
| 9936  | 42.18 | 38.34 | 32.78 | 29.16 | 24.37 |
| 9938  | 42.14 | 38.3  | 32.74 | 29.14 | 24.37 |
| 9940  | 42.08 | 38.26 | 32.69 | 29.11 | 24.34 |
| 9942  | 42.08 | 38.24 | 32.67 | 29.09 | 24.34 |
| 9944  | 42.03 | 38.2  | 32.66 | 29.07 | 24.34 |
| 9946  | 42.02 | 38.19 | 32.66 | 29.07 | 24.35 |
| 9948  | 41.96 | 38.14 | 32.63 | 29.04 | 24.33 |
| 9950  | 41.94 | 38.1  | 32.59 | 29.04 | 24.31 |
| 9952  | 41.91 | 38.08 | 32.58 | 29.02 | 24.32 |
| 9954  | 41.89 | 38.07 | 32.56 | 29.01 | 24.32 |
| 9956  | 41.82 | 38    | 32.5  | 28.95 | 24.27 |
| 9958  | 41.79 | 37.96 | 32.48 | 28.94 | 24.27 |
| 9960  | 41.76 | 37.94 | 32.46 | 28.92 | 24.26 |
| 9962  | 41.78 | 37.96 | 32.48 | 28.96 | 24.29 |
| 9964  | 41.76 | 37.94 | 32.48 | 28.96 | 24.3  |
| 9966  | 41.7  | 37.87 | 32.42 | 28.92 | 24.26 |
| 9968  | 41.65 | 37.82 | 32.38 | 28.88 | 24.23 |
| 9970  | 41.62 | 37.79 | 32.36 | 28.86 | 24.22 |
| 9972  | 41.59 | 37.77 | 32.35 | 28.85 | 24.22 |
| 9974  | 41.61 | 37.78 | 32.35 | 28.88 | 24.25 |
| 9976  | 41.59 | 37.77 | 32.35 | 28.87 | 24.27 |
| 9978  | 41.56 | 37.74 | 32.32 | 28.85 | 24.25 |
| 9980  | 41.46 | 37.65 | 32.24 | 28.78 | 24.2  |
| 9982  | 41.43 | 37.61 | 32.21 | 28.75 | 24.18 |
| 9984  | 41.39 | 37.59 | 32.2  | 28.74 | 24.18 |
| 9986  | 41.36 | 37.56 | 32.17 | 28.72 | 24.17 |
| 9988  | 41.34 | 37.54 | 32.15 | 28.72 | 24.18 |
| 9990  | 41.32 | 37.52 | 32.14 | 28.7  | 24.17 |
| 9992  | 41.34 | 37.53 | 32.18 | 28.75 | 24.22 |
| 9994  | 41.31 | 37.5  | 32.16 | 28.73 | 24.2  |
| 9996  | 41.23 | 37.42 | 32.09 | 28.67 | 24.15 |
| 9998  | 41.23 | 37.42 | 32.09 | 28.67 | 24.18 |
| 10000 | 41.21 | 37.41 | 32.09 | 28.68 | 24.18 |
| 10002 | 41.19 | 37.39 | 32.07 | 28.68 | 24.18 |
| 10004 | 41.13 | 37.33 | 32.02 | 28.62 | 24.14 |
| 10006 | 41.07 | 37.27 | 31.96 | 28.58 | 24.11 |
| 10008 | 41.08 | 37.28 | 31.98 | 28.6  | 24.15 |
| 10010 | 41.05 | 37.27 | 31.97 | 28.6  | 24.16 |
| 10012 | 40.99 | 37.21 | 31.92 | 28.54 | 24.12 |
| 10014 | 40.98 | 37.2  | 31.92 | 28.55 | 24.13 |
| 10016 | 40.92 | 37.14 | 31.86 | 28.5  | 24.09 |
| 10018 | 40.93 | 37.15 | 31.88 | 28.52 | 24.12 |
| 10020 | 40.91 | 37.14 | 31.88 | 28.52 | 24.13 |
| 10022 | 40.88 | 37.1  | 31.84 | 28.49 | 24.09 |

|       |       |       |       |       |       |
|-------|-------|-------|-------|-------|-------|
| 10024 | 40.85 | 37.05 | 31.81 | 28.48 | 24.1  |
| 10026 | 40.79 | 37    | 31.77 | 28.45 | 24.05 |
| 10028 | 40.76 | 36.98 | 31.76 | 28.44 | 24.06 |
| 10030 | 40.74 | 36.97 | 31.75 | 28.42 | 24.06 |
| 10032 | 40.72 | 36.94 | 31.74 | 28.43 | 24.08 |
| 10034 | 40.67 | 36.89 | 31.68 | 28.39 | 24.02 |
| 10036 | 40.65 | 36.87 | 31.66 | 28.37 | 24.02 |
| 10038 | 40.61 | 36.84 | 31.64 | 28.35 | 24.02 |
| 10040 | 40.56 | 36.8  | 31.61 | 28.32 | 24    |
| 10042 | 40.56 | 36.79 | 31.61 | 28.31 | 24.01 |
| 10044 | 40.51 | 36.75 | 31.57 | 28.29 | 24    |
| 10046 | 40.51 | 36.76 | 31.59 | 28.33 | 24.04 |
| 10048 | 40.47 | 36.71 | 31.56 | 28.28 | 24.01 |
| 10050 | 40.44 | 36.69 | 31.53 | 28.27 | 24.01 |
| 10052 | 40.39 | 36.65 | 31.5  | 28.23 | 23.98 |
| 10054 | 40.38 | 36.64 | 31.49 | 28.25 | 23.98 |
| 10056 | 40.34 | 36.59 | 31.46 | 28.22 | 23.95 |
| 10058 | 40.32 | 36.57 | 31.44 | 28.21 | 23.95 |
| 10060 | 40.29 | 36.54 | 31.42 | 28.19 | 23.95 |
| 10062 | 40.24 | 36.5  | 31.4  | 28.17 | 23.93 |
| 10064 | 40.23 | 36.49 | 31.38 | 28.16 | 23.94 |
| 10066 | 40.21 | 36.46 | 31.36 | 28.15 | 23.93 |
| 10068 | 40.2  | 36.45 | 31.37 | 28.15 | 23.93 |
| 10070 | 40.15 | 36.41 | 31.32 | 28.13 | 23.92 |
| 10072 | 40.1  | 36.36 | 31.28 | 28.09 | 23.91 |
| 10074 | 40.09 | 36.35 | 31.28 | 28.09 | 23.91 |
| 10076 | 40.06 | 36.32 | 31.26 | 28.08 | 23.91 |
| 10078 | 40.04 | 36.3  | 31.24 | 28.07 | 23.9  |
| 10080 | 39.99 | 36.25 | 31.22 | 28.04 | 23.89 |
| 10082 | 39.98 | 36.24 | 31.21 | 28.04 | 23.89 |
| 10084 | 39.95 | 36.22 | 31.18 | 28.02 | 23.88 |
| 10086 | 39.87 | 36.15 | 31.12 | 27.97 | 23.83 |
| 10088 | 39.88 | 36.16 | 31.14 | 27.98 | 23.85 |
| 10090 | 39.85 | 36.13 | 31.12 | 27.97 | 23.86 |
| 10092 | 39.83 | 36.11 | 31.1  | 27.95 | 23.85 |
| 10094 | 39.81 | 36.1  | 31.1  | 27.95 | 23.86 |
| 10096 | 39.79 | 36.07 | 31.07 | 27.93 | 23.85 |
| 10098 | 39.75 | 36.04 | 31.04 | 27.91 | 23.82 |
| 10100 | 39.69 | 35.99 | 31.01 | 27.88 | 23.81 |
| 10102 | 39.71 | 35.99 | 31.01 | 27.9  | 23.84 |
| 10104 | 39.68 | 35.97 | 30.98 | 27.87 | 23.81 |
| 10106 | 39.67 | 35.95 | 30.98 | 27.88 | 23.83 |
| 10108 | 39.63 | 35.92 | 30.95 | 27.85 | 23.81 |
| 10110 | 39.6  | 35.88 | 30.92 | 27.85 | 23.81 |

|       |       |       |       |       |       |
|-------|-------|-------|-------|-------|-------|
| 10112 | 39.53 | 35.82 | 30.88 | 27.79 | 23.76 |
| 10114 | 39.53 | 35.82 | 30.89 | 27.82 | 23.79 |
| 10116 | 39.51 | 35.81 | 30.87 | 27.8  | 23.79 |
| 10118 | 39.47 | 35.76 | 30.83 | 27.77 | 23.78 |
| 10120 | 39.43 | 35.73 | 30.81 | 27.75 | 23.76 |
| 10122 | 39.41 | 35.71 | 30.8  | 27.73 | 23.77 |
| 10124 | 39.41 | 35.71 | 30.8  | 27.74 | 23.79 |
| 10126 | 39.36 | 35.67 | 30.78 | 27.72 | 23.77 |
| 10128 | 39.35 | 35.66 | 30.77 | 27.72 | 23.76 |
| 10130 | 39.29 | 35.6  | 30.71 | 27.68 | 23.75 |
| 10132 | 39.27 | 35.58 | 30.69 | 27.64 | 23.72 |
| 10134 | 39.26 | 35.58 | 30.7  | 27.66 | 23.75 |
| 10136 | 39.24 | 35.57 | 30.69 | 27.66 | 23.75 |
| 10138 | 39.2  | 35.54 | 30.67 | 27.64 | 23.73 |
| 10140 | 39.19 | 35.52 | 30.66 | 27.64 | 23.74 |
| 10142 | 39.15 | 35.48 | 30.62 | 27.61 | 23.72 |
| 10144 | 39.12 | 35.47 | 30.61 | 27.6  | 23.71 |
| 10146 | 39.07 | 35.39 | 30.56 | 27.55 | 23.67 |
| 10148 | 39.07 | 35.4  | 30.56 | 27.56 | 23.68 |
| 10150 | 39.07 | 35.4  | 30.58 | 27.58 | 23.71 |
| 10152 | 39.04 | 35.38 | 30.56 | 27.57 | 23.71 |
| 10154 | 39.01 | 35.35 | 30.53 | 27.55 | 23.71 |
| 10156 | 38.96 | 35.3  | 30.49 | 27.5  | 23.67 |
| 10158 | 38.96 | 35.31 | 30.5  | 27.52 | 23.69 |
| 10160 | 38.93 | 35.28 | 30.48 | 27.51 | 23.69 |
| 10162 | 38.87 | 35.21 | 30.42 | 27.46 | 23.65 |
| 10164 | 38.82 | 35.17 | 30.4  | 27.44 | 23.63 |
| 10166 | 38.84 | 35.19 | 30.41 | 27.46 | 23.66 |
| 10168 | 38.79 | 35.14 | 30.38 | 27.43 | 23.63 |
| 10170 | 38.79 | 35.15 | 30.38 | 27.45 | 23.65 |
| 10172 | 38.79 | 35.15 | 30.38 | 27.46 | 23.67 |
| 10174 | 38.77 | 35.12 | 30.37 | 27.45 | 23.66 |
| 10176 | 38.74 | 35.1  | 30.35 | 27.43 | 23.65 |
| 10178 | 38.69 | 35.05 | 30.31 | 27.41 | 23.64 |
| 10180 | 38.68 | 35.04 | 30.32 | 27.4  | 23.64 |
| 10182 | 38.64 | 35    | 30.28 | 27.38 | 23.62 |
| 10184 | 38.64 | 35    | 30.28 | 27.38 | 23.63 |
| 10186 | 38.61 | 34.98 | 30.27 | 27.36 | 23.62 |
| 10188 | 38.58 | 34.96 | 30.24 | 27.34 | 23.62 |
| 10190 | 38.54 | 34.92 | 30.21 | 27.33 | 23.61 |
| 10192 | 38.51 | 34.89 | 30.19 | 27.3  | 23.59 |
| 10194 | 38.5  | 34.88 | 30.19 | 27.3  | 23.61 |
| 10196 | 38.45 | 34.85 | 30.17 | 27.29 | 23.58 |
| 10198 | 38.41 | 34.8  | 30.11 | 27.23 | 23.56 |

|       |       |       |       |       |       |
|-------|-------|-------|-------|-------|-------|
| 10200 | 38.42 | 34.81 | 30.13 | 27.27 | 23.59 |
| 10202 | 38.39 | 34.77 | 30.11 | 27.25 | 23.58 |
| 10204 | 38.37 | 34.76 | 30.1  | 27.25 | 23.57 |
| 10206 | 38.36 | 34.74 | 30.09 | 27.26 | 23.57 |
| 10208 | 38.31 | 34.7  | 30.06 | 27.21 | 23.53 |
| 10210 | 38.3  | 34.7  | 30.06 | 27.22 | 23.56 |
| 10212 | 38.28 | 34.67 | 30.04 | 27.21 | 23.56 |
| 10214 | 38.24 | 34.63 | 30.01 | 27.18 | 23.54 |
| 10216 | 38.23 | 34.63 | 30.01 | 27.18 | 23.55 |
| 10218 | 38.2  | 34.6  | 29.98 | 27.16 | 23.53 |
| 10220 | 38.17 | 34.57 | 29.96 | 27.12 | 23.51 |
| 10222 | 38.12 | 34.54 | 29.93 | 27.11 | 23.53 |
| 10224 | 38.1  | 34.51 | 29.92 | 27.1  | 23.51 |
| 10226 | 38.06 | 34.48 | 29.88 | 27.06 | 23.47 |
| 10228 | 38.07 | 34.48 | 29.89 | 27.09 | 23.5  |
| 10230 | 38    | 34.42 | 29.84 | 27.04 | 23.47 |
| 10232 | 37.99 | 34.42 | 29.84 | 27.06 | 23.49 |
| 10234 | 37.97 | 34.39 | 29.82 | 27.03 | 23.48 |
| 10236 | 37.92 | 34.34 | 29.77 | 26.99 | 23.44 |
| 10238 | 37.92 | 34.33 | 29.78 | 27    | 23.45 |
| 10240 | 37.93 | 34.34 | 29.81 | 27.04 | 23.49 |
| 10242 | 37.87 | 34.28 | 29.74 | 26.99 | 23.43 |
| 10244 | 37.84 | 34.27 | 29.73 | 26.98 | 23.43 |
| 10246 | 37.85 | 34.28 | 29.75 | 26.99 | 23.45 |
| 10248 | 37.79 | 34.22 | 29.7  | 26.96 | 23.44 |
| 10250 | 37.78 | 34.21 | 29.68 | 26.95 | 23.42 |
| 10252 | 37.74 | 34.16 | 29.66 | 26.93 | 23.41 |
| 10254 | 37.71 | 34.14 | 29.63 | 26.9  | 23.39 |
| 10256 | 37.68 | 34.12 | 29.62 | 26.89 | 23.39 |
| 10258 | 37.67 | 34.11 | 29.62 | 26.9  | 23.4  |
| 10260 | 37.63 | 34.08 | 29.58 | 26.86 | 23.38 |
| 10262 | 37.6  | 34.05 | 29.57 | 26.84 | 23.37 |
| 10264 | 37.56 | 34.03 | 29.54 | 26.82 | 23.35 |
| 10266 | 37.55 | 34.01 | 29.53 | 26.81 | 23.36 |
| 10268 | 37.51 | 33.98 | 29.5  | 26.79 | 23.35 |
| 10270 | 37.5  | 33.96 | 29.48 | 26.78 | 23.36 |
| 10272 | 37.48 | 33.94 | 29.47 | 26.76 | 23.35 |
| 10274 | 37.48 | 33.95 | 29.46 | 26.77 | 23.36 |
| 10276 | 37.45 | 33.93 | 29.47 | 26.78 | 23.37 |
| 10278 | 37.44 | 33.91 | 29.47 | 26.79 | 23.38 |
| 10280 | 37.39 | 33.86 | 29.41 | 26.75 | 23.36 |
| 10282 | 37.38 | 33.86 | 29.41 | 26.75 | 23.36 |
| 10284 | 37.36 | 33.84 | 29.42 | 26.75 | 23.36 |
| 10286 | 37.33 | 33.8  | 29.36 | 26.72 | 23.35 |



|       |       |       |       |       |       |
|-------|-------|-------|-------|-------|-------|
| 10288 | 37.32 | 33.79 | 29.37 | 26.71 | 23.35 |
| 10290 | 37.29 | 33.76 | 29.34 | 26.69 | 23.33 |
| 10292 | 37.28 | 33.76 | 29.34 | 26.7  | 23.35 |
| 10294 | 37.28 | 33.75 | 29.36 | 26.72 | 23.37 |
| 10296 | 37.26 | 33.73 | 29.33 | 26.7  | 23.35 |
| 10298 | 37.24 | 33.72 | 29.32 | 26.71 | 23.34 |
| 10300 | 37.19 | 33.67 | 29.29 | 26.67 | 23.32 |
| 10302 | 37.14 | 33.63 | 29.25 | 26.63 | 23.3  |
| 10304 | 37.12 | 33.6  | 29.23 | 26.62 | 23.28 |
| 10306 | 37.09 | 33.58 | 29.21 | 26.6  | 23.28 |
| 10308 | 37.07 | 33.56 | 29.2  | 26.6  | 23.28 |
| 10310 | 37.04 | 33.54 | 29.18 | 26.59 | 23.27 |
| 10312 | 37.03 | 33.52 | 29.17 | 26.57 | 23.27 |
| 10314 | 37    | 33.51 | 29.16 | 26.57 | 23.27 |
| 10316 | 36.98 | 33.48 | 29.14 | 26.56 | 23.26 |
| 10318 | 36.98 | 33.48 | 29.15 | 26.57 | 23.28 |
| 10320 | 36.94 | 33.44 | 29.12 | 26.54 | 23.26 |
| 10322 | 36.92 | 33.42 | 29.11 | 26.54 | 23.26 |
| 10324 | 36.89 | 33.4  | 29.09 | 26.52 | 23.26 |
| 10326 | 36.89 | 33.4  | 29.1  | 26.53 | 23.26 |
| 10328 | 36.86 | 33.36 | 29.06 | 26.5  | 23.24 |
| 10330 | 36.82 | 33.33 | 29.03 | 26.48 | 23.23 |
| 10332 | 36.8  | 33.31 | 29.02 | 26.48 | 23.23 |
| 10334 | 36.79 | 33.29 | 29.01 | 26.46 | 23.22 |
| 10336 | 36.76 | 33.27 | 28.99 | 26.44 | 23.21 |
| 10338 | 36.75 | 33.27 | 28.98 | 26.45 | 23.24 |
| 10340 | 36.73 | 33.26 | 28.97 | 26.44 | 23.24 |
| 10342 | 36.68 | 33.21 | 28.94 | 26.4  | 23.21 |
| 10344 | 36.68 | 33.21 | 28.94 | 26.42 | 23.22 |
| 10346 | 36.67 | 33.2  | 28.94 | 26.41 | 23.24 |
| 10348 | 36.64 | 33.18 | 28.93 | 26.39 | 23.24 |
| 10350 | 36.61 | 33.14 | 28.91 | 26.38 | 23.22 |
| 10352 | 36.61 | 33.14 | 28.92 | 26.4  | 23.24 |
| 10354 | 36.61 | 33.14 | 28.91 | 26.4  | 23.23 |
| 10356 | 36.56 | 33.1  | 28.88 | 26.39 | 23.22 |
| 10358 | 36.54 | 33.07 | 28.85 | 26.37 | 23.21 |
| 10360 | 36.5  | 33.03 | 28.82 | 26.32 | 23.17 |
| 10362 | 36.47 | 33.01 | 28.8  | 26.31 | 23.17 |
| 10364 | 36.46 | 32.99 | 28.79 | 26.31 | 23.16 |
| 10366 | 36.44 | 32.98 | 28.78 | 26.31 | 23.18 |
| 10368 | 36.44 | 32.98 | 28.8  | 26.32 | 23.19 |
| 10370 | 36.42 | 32.97 | 28.78 | 26.32 | 23.18 |
| 10372 | 36.4  | 32.95 | 28.77 | 26.3  | 23.2  |
| 10374 | 36.38 | 32.92 | 28.74 | 26.26 | 23.17 |

|       |       |       |       |       |       |
|-------|-------|-------|-------|-------|-------|
| 10376 | 36.36 | 32.9  | 28.73 | 26.26 | 23.18 |
| 10378 | 36.33 | 32.89 | 28.73 | 26.26 | 23.18 |
| 10380 | 36.3  | 32.88 | 28.72 | 26.24 | 23.16 |
| 10382 | 36.31 | 32.88 | 28.72 | 26.25 | 23.19 |
| 10384 | 36.28 | 32.85 | 28.69 | 26.23 | 23.17 |
| 10386 | 36.26 | 32.83 | 28.67 | 26.22 | 23.17 |
| 10388 | 36.23 | 32.8  | 28.66 | 26.22 | 23.16 |
| 10390 | 36.23 | 32.8  | 28.67 | 26.22 | 23.17 |
| 10392 | 36.19 | 32.76 | 28.64 | 26.21 | 23.15 |
| 10394 | 36.18 | 32.74 | 28.62 | 26.19 | 23.14 |
| 10396 | 36.13 | 32.71 | 28.59 | 26.16 | 23.12 |
| 10398 | 36.09 | 32.66 | 28.55 | 26.13 | 23.1  |
| 10400 | 36.12 | 32.7  | 28.59 | 26.18 | 23.15 |
| 10402 | 36.09 | 32.67 | 28.57 | 26.14 | 23.12 |
| 10404 | 36.04 | 32.62 | 28.52 | 26.12 | 23.09 |
| 10406 | 36.01 | 32.61 | 28.52 | 26.12 | 23.09 |
| 10408 | 35.99 | 32.58 | 28.49 | 26.09 | 23.08 |
| 10410 | 35.96 | 32.55 | 28.46 | 26.07 | 23.07 |
| 10412 | 35.94 | 32.53 | 28.46 | 26.05 | 23.06 |
| 10414 | 35.91 | 32.5  | 28.42 | 26.03 | 23.03 |
| 10416 | 35.92 | 32.53 | 28.45 | 26.06 | 23.09 |
| 10418 | 35.88 | 32.47 | 28.4  | 26.02 | 23.04 |
| 10420 | 35.84 | 32.45 | 28.39 | 26    | 23.04 |
| 10422 | 35.84 | 32.44 | 28.39 | 26.01 | 23.05 |
| 10424 | 35.86 | 32.47 | 28.42 | 26.04 | 23.09 |
| 10426 | 35.8  | 32.41 | 28.37 | 25.99 | 23.04 |
| 10428 | 35.76 | 32.38 | 28.34 | 25.97 | 23.03 |
| 10430 | 35.73 | 32.35 | 28.33 | 25.95 | 23.03 |
| 10432 | 35.72 | 32.34 | 28.31 | 25.94 | 23.02 |
| 10434 | 35.69 | 32.32 | 28.3  | 25.94 | 23.01 |
| 10436 | 35.67 | 32.3  | 28.29 | 25.92 | 23.01 |
| 10438 | 35.66 | 32.29 | 28.27 | 25.92 | 23.01 |
| 10440 | 35.63 | 32.27 | 28.26 | 25.91 | 23    |
| 10442 | 35.61 | 32.25 | 28.24 | 25.89 | 23    |
| 10444 | 35.59 | 32.23 | 28.23 | 25.88 | 22.99 |
| 10446 | 35.56 | 32.2  | 28.21 | 25.85 | 22.98 |
| 10448 | 35.5  | 32.16 | 28.15 | 25.81 | 22.93 |
| 10450 | 35.53 | 32.18 | 28.2  | 25.87 | 22.98 |
| 10452 | 35.47 | 32.12 | 28.15 | 25.83 | 22.94 |
| 10454 | 35.49 | 32.14 | 28.17 | 25.85 | 22.97 |
| 10456 | 35.48 | 32.13 | 28.16 | 25.84 | 22.97 |
| 10458 | 35.45 | 32.1  | 28.14 | 25.83 | 22.96 |
| 10460 | 35.45 | 32.1  | 28.14 | 25.84 | 22.97 |
| 10462 | 35.4  | 32.05 | 28.1  | 25.81 | 22.95 |

|       |       |       |       |       |       |
|-------|-------|-------|-------|-------|-------|
| 10464 | 35.39 | 32.05 | 28.1  | 25.8  | 22.95 |
| 10466 | 35.38 | 32.04 | 28.1  | 25.8  | 22.95 |
| 10468 | 35.32 | 31.99 | 28.06 | 25.76 | 22.92 |
| 10470 | 35.33 | 31.99 | 28.06 | 25.76 | 22.95 |
| 10472 | 35.32 | 31.99 | 28.06 | 25.78 | 22.97 |
| 10474 | 35.29 | 31.97 | 28.05 | 25.77 | 22.96 |
| 10476 | 35.28 | 31.95 | 28.04 | 25.75 | 22.95 |
| 10478 | 35.25 | 31.93 | 28.01 | 25.73 | 22.93 |
| 10480 | 35.23 | 31.91 | 28    | 25.73 | 22.93 |
| 10482 | 35.21 | 31.88 | 27.99 | 25.72 | 22.92 |
| 10484 | 35.2  | 31.88 | 27.98 | 25.72 | 22.92 |
| 10486 | 35.19 | 31.87 | 27.98 | 25.72 | 22.92 |
| 10488 | 35.17 | 31.85 | 27.97 | 25.71 | 22.91 |
| 10490 | 35.15 | 31.84 | 27.96 | 25.7  | 22.91 |
| 10492 | 35.12 | 31.82 | 27.94 | 25.69 | 22.91 |
| 10494 | 35.08 | 31.78 | 27.92 | 25.67 | 22.89 |
| 10496 | 35.07 | 31.77 | 27.91 | 25.67 | 22.9  |
| 10498 | 35.07 | 31.77 | 27.91 | 25.67 | 22.9  |
| 10500 | 35.06 | 31.77 | 27.91 | 25.66 | 22.91 |
| 10502 | 35.03 | 31.74 | 27.88 | 25.64 | 22.89 |
| 10504 | 35    | 31.72 | 27.87 | 25.63 | 22.88 |
| 10506 | 34.99 | 31.71 | 27.86 | 25.62 | 22.88 |
| 10508 | 34.94 | 31.67 | 27.84 | 25.6  | 22.87 |
| 10510 | 34.91 | 31.64 | 27.8  | 25.57 | 22.85 |
| 10512 | 34.91 | 31.64 | 27.8  | 25.58 | 22.87 |
| 10514 | 34.91 | 31.64 | 27.8  | 25.58 | 22.87 |
| 10516 | 34.88 | 31.61 | 27.79 | 25.57 | 22.86 |
| 10518 | 34.85 | 31.59 | 27.76 | 25.55 | 22.86 |
| 10520 | 34.85 | 31.58 | 27.76 | 25.55 | 22.86 |
| 10522 | 34.83 | 31.55 | 27.73 | 25.53 | 22.84 |
| 10524 | 34.77 | 31.51 | 27.71 | 25.5  | 22.83 |
| 10526 | 34.78 | 31.53 | 27.72 | 25.52 | 22.84 |
| 10528 | 34.77 | 31.52 | 27.72 | 25.52 | 22.85 |
| 10530 | 34.74 | 31.48 | 27.69 | 25.51 | 22.83 |
| 10532 | 34.75 | 31.48 | 27.7  | 25.52 | 22.84 |
| 10534 | 34.73 | 31.47 | 27.69 | 25.52 | 22.85 |
| 10536 | 34.7  | 31.44 | 27.68 | 25.49 | 22.82 |
| 10538 | 34.7  | 31.45 | 27.69 | 25.51 | 22.84 |
| 10540 | 34.67 | 31.43 | 27.66 | 25.5  | 22.84 |
| 10542 | 34.65 | 31.4  | 27.64 | 25.48 | 22.83 |
| 10544 | 34.63 | 31.38 | 27.63 | 25.47 | 22.82 |
| 10546 | 34.6  | 31.36 | 27.61 | 25.44 | 22.81 |
| 10548 | 34.58 | 31.35 | 27.6  | 25.44 | 22.81 |
| 10550 | 34.55 | 31.34 | 27.58 | 25.43 | 22.81 |

|       |       |       |       |       |       |
|-------|-------|-------|-------|-------|-------|
| 10552 | 34.56 | 31.33 | 27.6  | 25.44 | 22.83 |
| 10554 | 34.53 | 31.31 | 27.57 | 25.42 | 22.82 |
| 10556 | 34.5  | 31.29 | 27.55 | 25.4  | 22.8  |
| 10558 | 34.46 | 31.25 | 27.52 | 25.37 | 22.78 |
| 10560 | 34.44 | 31.23 | 27.51 | 25.37 | 22.76 |
| 10562 | 34.45 | 31.24 | 27.53 | 25.39 | 22.79 |
| 10564 | 34.44 | 31.23 | 27.52 | 25.4  | 22.79 |
| 10566 | 34.39 | 31.18 | 27.48 | 25.37 | 22.77 |
| 10568 | 34.39 | 31.18 | 27.48 | 25.36 | 22.77 |
| 10570 | 34.37 | 31.17 | 27.46 | 25.36 | 22.76 |
| 10572 | 34.37 | 31.17 | 27.47 | 25.36 | 22.76 |
| 10574 | 34.31 | 31.12 | 27.44 | 25.33 | 22.74 |
| 10576 | 34.31 | 31.11 | 27.43 | 25.33 | 22.75 |
| 10578 | 34.3  | 31.11 | 27.42 | 25.32 | 22.75 |
| 10580 | 34.27 | 31.09 | 27.4  | 25.3  | 22.73 |
| 10582 | 34.25 | 31.06 | 27.38 | 25.28 | 22.73 |
| 10584 | 34.24 | 31.05 | 27.38 | 25.28 | 22.73 |
| 10586 | 34.23 | 31.04 | 27.37 | 25.28 | 22.75 |
| 10588 | 34.21 | 31.03 | 27.36 | 25.28 | 22.75 |
| 10590 | 34.19 | 31.02 | 27.35 | 25.27 | 22.74 |
| 10592 | 34.18 | 31    | 27.34 | 25.26 | 22.73 |
| 10594 | 34.16 | 30.98 | 27.33 | 25.24 | 22.73 |
| 10596 | 34.13 | 30.96 | 27.32 | 25.24 | 22.73 |
| 10598 | 34.11 | 30.95 | 27.31 | 25.22 | 22.72 |
| 10600 | 34.12 | 30.95 | 27.31 | 25.24 | 22.74 |
| 10602 | 34.08 | 30.93 | 27.29 | 25.21 | 22.72 |
| 10604 | 34.06 | 30.91 | 27.27 | 25.2  | 22.71 |
| 10606 | 34.05 | 30.89 | 27.27 | 25.2  | 22.71 |
| 10608 | 34.03 | 30.88 | 27.26 | 25.19 | 22.71 |
| 10610 | 33.98 | 30.84 | 27.22 | 25.16 | 22.68 |
| 10612 | 33.99 | 30.84 | 27.23 | 25.17 | 22.7  |
| 10614 | 33.95 | 30.81 | 27.2  | 25.15 | 22.69 |
| 10616 | 33.9  | 30.77 | 27.17 | 25.12 | 22.65 |
| 10618 | 33.92 | 30.79 | 27.19 | 25.15 | 22.68 |
| 10620 | 33.92 | 30.78 | 27.19 | 25.14 | 22.69 |
| 10622 | 33.88 | 30.74 | 27.15 | 25.13 | 22.67 |
| 10624 | 33.88 | 30.74 | 27.16 | 25.13 | 22.68 |
| 10626 | 33.88 | 30.74 | 27.15 | 25.13 | 22.66 |
| 10628 | 33.86 | 30.73 | 27.14 | 25.12 | 22.66 |
| 10630 | 33.84 | 30.71 | 27.14 | 25.13 | 22.68 |
| 10632 | 33.82 | 30.71 | 27.14 | 25.14 | 22.68 |
| 10634 | 33.81 | 30.69 | 27.13 | 25.12 | 22.68 |
| 10636 | 33.82 | 30.7  | 27.15 | 25.14 | 22.7  |
| 10638 | 33.77 | 30.66 | 27.11 | 25.1  | 22.67 |

|       |       |       |       |       |       |
|-------|-------|-------|-------|-------|-------|
| 10640 | 33.75 | 30.64 | 27.09 | 25.08 | 22.65 |
| 10642 | 33.74 | 30.63 | 27.09 | 25.08 | 22.67 |
| 10644 | 33.73 | 30.64 | 27.09 | 25.08 | 22.68 |
| 10646 | 33.71 | 30.61 | 27.07 | 25.07 | 22.66 |
| 10648 | 33.72 | 30.62 | 27.07 | 25.07 | 22.68 |
| 10650 | 33.67 | 30.58 | 27.04 | 25.05 | 22.66 |
| 10652 | 33.64 | 30.56 | 27.04 | 25.05 | 22.66 |
| 10654 | 33.61 | 30.53 | 27.01 | 25.02 | 22.63 |
| 10656 | 33.61 | 30.53 | 27.02 | 25.04 | 22.66 |
| 10658 | 33.61 | 30.51 | 27    | 25.03 | 22.65 |
| 10660 | 33.63 | 30.53 | 27.03 | 25.05 | 22.66 |
| 10662 | 33.63 | 30.53 | 27.04 | 25.07 | 22.67 |
| 10664 | 33.59 | 30.51 | 27.01 | 25.06 | 22.68 |
| 10666 | 33.55 | 30.47 | 26.97 | 25.02 | 22.64 |
| 10668 | 33.51 | 30.43 | 26.94 | 24.99 | 22.61 |
| 10670 | 33.52 | 30.44 | 26.96 | 25.02 | 22.64 |
| 10672 | 33.48 | 30.4  | 26.93 | 24.97 | 22.61 |
| 10674 | 33.46 | 30.4  | 26.92 | 24.97 | 22.61 |
| 10676 | 33.43 | 30.37 | 26.89 | 24.94 | 22.58 |
| 10678 | 33.45 | 30.38 | 26.93 | 24.99 | 22.63 |
| 10680 | 33.42 | 30.35 | 26.88 | 24.94 | 22.6  |
| 10682 | 33.36 | 30.29 | 26.84 | 24.92 | 22.57 |
| 10684 | 33.36 | 30.31 | 26.85 | 24.92 | 22.59 |
| 10686 | 33.34 | 30.28 | 26.83 | 24.9  | 22.57 |
| 10688 | 33.34 | 30.29 | 26.84 | 24.91 | 22.58 |
| 10690 | 33.27 | 30.22 | 26.78 | 24.85 | 22.53 |
| 10692 | 33.3  | 30.25 | 26.81 | 24.89 | 22.57 |
| 10694 | 33.28 | 30.25 | 26.81 | 24.89 | 22.58 |
| 10696 | 33.27 | 30.24 | 26.8  | 24.88 | 22.57 |
| 10698 | 33.24 | 30.22 | 26.79 | 24.87 | 22.56 |
| 10700 | 33.22 | 30.19 | 26.76 | 24.84 | 22.54 |
| 10702 | 33.2  | 30.17 | 26.75 | 24.84 | 22.54 |
| 10704 | 33.2  | 30.18 | 26.76 | 24.85 | 22.55 |
| 10706 | 33.19 | 30.17 | 26.75 | 24.85 | 22.56 |
| 10708 | 33.16 | 30.15 | 26.74 | 24.85 | 22.55 |
| 10710 | 33.15 | 30.14 | 26.73 | 24.83 | 22.56 |
| 10712 | 33.14 | 30.12 | 26.72 | 24.83 | 22.55 |
| 10714 | 33.12 | 30.11 | 26.71 | 24.82 | 22.54 |
| 10716 | 33.1  | 30.1  | 26.7  | 24.82 | 22.55 |
| 10718 | 33.09 | 30.09 | 26.69 | 24.81 | 22.54 |
| 10720 | 33.06 | 30.06 | 26.67 | 24.79 | 22.53 |
| 10722 | 33.05 | 30.05 | 26.66 | 24.78 | 22.52 |
| 10724 | 33.02 | 30.03 | 26.66 | 24.78 | 22.52 |
| 10726 | 33.02 | 30.03 | 26.65 | 24.79 | 22.53 |

|       |       |       |       |       |       |
|-------|-------|-------|-------|-------|-------|
| 10728 | 33    | 30.02 | 26.62 | 24.77 | 22.5  |
| 10730 | 32.99 | 30    | 26.64 | 24.77 | 22.52 |

| tg10K/min | ##Temp./°<br>C | Mass/%   |
|-----------|----------------|----------|
|           | 39.679         | 100      |
|           | 42.179         | 99.02046 |
|           | 44.679         | 98.71706 |
|           | 47.179         | 98.42482 |
|           | 49.679         | 98.12388 |
|           | 52.179         | 97.80546 |
|           | 54.679         | 97.46322 |
|           | 57.179         | 97.09131 |
|           | 59.679         | 96.69823 |
|           | 62.179         | 96.27127 |
|           | 64.679         | 95.82681 |
|           | 67.179         | 95.34514 |
|           | 69.679         | 94.8645  |
|           | 72.179         | 94.35872 |
|           | 74.679         | 93.8495  |
|           | 77.179         | 93.30961 |
|           | 79.679         | 92.7887  |
|           | 82.179         | 92.25028 |
|           | 84.679         | 91.74537 |
|           | 87.179         | 91.24878 |
|           | 89.679         | 90.76379 |
|           | 92.179         | 90.28547 |
|           | 94.679         | 89.83006 |
|           | 97.179         | 89.39578 |
|           | 99.679         | 88.98376 |
|           | 102.179        | 88.60175 |
|           | 104.679        | 88.25453 |
|           | 107.179        | 87.91018 |
|           | 109.679        | 87.59412 |
|           | 112.179        | 87.31775 |
|           | 114.679        | 87.04603 |
|           | 117.179        | 86.80386 |
|           | 119.679        | 86.5793  |
|           | 122.179        | 86.35818 |
|           | 124.679        | 86.18355 |
|           | 127.179        | 85.99101 |
|           | 129.679        | 85.81081 |
|           | 132.179        | 85.65885 |
|           | 134.679        | 85.51201 |

|         |          |
|---------|----------|
| 137.179 | 85.36428 |
| 139.679 | 85.24305 |
| 142.179 | 85.11084 |
| 144.679 | 84.98592 |
| 147.179 | 84.8752  |
| 149.679 | 84.77106 |
| 152.179 | 84.64988 |
| 154.679 | 84.53446 |
| 157.179 | 84.43912 |
| 159.679 | 84.3375  |
| 162.179 | 84.23208 |
| 164.679 | 84.13947 |
| 167.179 | 84.03891 |
| 169.679 | 83.94639 |
| 172.179 | 83.86963 |
| 174.679 | 83.77876 |
| 177.179 | 83.70242 |
| 179.679 | 83.60857 |
| 182.179 | 83.52324 |
| 184.679 | 83.43225 |
| 187.179 | 83.35183 |
| 189.679 | 83.26185 |
| 192.179 | 83.18355 |
| 194.679 | 83.10482 |
| 197.179 | 83.02672 |
| 199.679 | 82.93864 |
| 202.179 | 82.85703 |
| 204.679 | 82.75709 |
| 207.179 | 82.64638 |
| 209.679 | 82.53929 |
| 212.179 | 82.44134 |
| 214.679 | 82.29132 |
| 217.179 | 82.15587 |
| 219.679 | 81.98783 |
| 222.179 | 81.80065 |
| 224.679 | 81.58991 |
| 227.179 | 81.35013 |
| 229.679 | 81.05933 |
| 232.179 | 80.70009 |
| 234.679 | 80.28364 |
| 237.179 | 79.73964 |
| 239.679 | 78.99089 |
| 242.179 | 77.99148 |
| 244.679 | 76.87879 |

|         |          |
|---------|----------|
| 247.179 | 75.61826 |
| 249.679 | 74.38028 |
| 252.179 | 72.94181 |
| 254.679 | 71.77965 |
| 257.179 | 70.54962 |
| 259.679 | 69.31747 |
| 262.179 | 67.96286 |
| 264.679 | 66.65526 |
| 267.179 | 65.41996 |
| 269.679 | 64.56756 |
| 272.179 | 63.66257 |
| 274.679 | 62.85044 |
| 277.179 | 62.10226 |
| 279.679 | 61.40913 |
| 282.179 | 60.79617 |
| 284.679 | 60.18699 |
| 287.179 | 59.63203 |
| 289.679 | 59.10311 |
| 292.179 | 58.6047  |
| 294.679 | 58.12723 |
| 297.179 | 57.67813 |
| 299.679 | 57.26812 |
| 302.179 | 56.8742  |
| 304.679 | 56.49784 |
| 307.179 | 56.14171 |
| 309.679 | 55.80532 |
| 312.179 | 55.49633 |
| 314.679 | 55.18884 |
| 317.179 | 54.90686 |
| 319.679 | 54.63955 |
| 322.179 | 54.3782  |
| 324.679 | 54.11521 |
| 327.179 | 53.87989 |
| 329.679 | 53.64929 |
| 332.179 | 53.41336 |
| 334.679 | 53.21506 |
| 337.179 | 52.99589 |
| 339.679 | 52.80451 |
| 342.179 | 52.59824 |
| 344.679 | 52.39979 |
| 347.179 | 52.20661 |
| 349.679 | 52.0173  |
| 352.179 | 51.82581 |
| 354.679 | 51.61928 |



|         |          |
|---------|----------|
| 357.179 | 51.45683 |
| 359.679 | 51.28031 |
| 362.179 | 51.09614 |
| 364.679 | 50.93564 |
| 367.179 | 50.76119 |
| 369.679 | 50.61172 |
| 372.179 | 50.42776 |
| 374.679 | 50.27014 |
| 377.179 | 50.14248 |
| 379.679 | 49.96619 |
| 382.179 | 49.79296 |
| 384.679 | 49.65017 |
| 387.179 | 49.50191 |
| 389.679 | 49.35696 |
| 392.179 | 49.19842 |
| 394.679 | 49.06969 |
| 397.179 | 48.95536 |
| 399.679 | 48.8214  |
| 402.179 | 48.68928 |
| 404.679 | 48.54498 |
| 407.179 | 48.40406 |
| 409.679 | 48.27952 |
| 412.179 | 48.1542  |
| 414.679 | 48.0354  |
| 417.179 | 47.94224 |
| 419.679 | 47.81213 |
| 422.179 | 47.68293 |
| 424.679 | 47.5487  |
| 427.179 | 47.43045 |
| 429.679 | 47.32468 |
| 432.179 | 47.19379 |
| 434.679 | 47.05254 |
| 437.179 | 46.94743 |
| 439.679 | 46.82521 |
| 442.179 | 46.66925 |
| 444.679 | 46.53881 |
| 447.179 | 46.36524 |
| 449.679 | 46.23011 |
| 452.179 | 46.05837 |
| 454.679 | 45.90313 |
| 457.179 | 45.72439 |
| 459.679 | 45.57009 |
| 462.179 | 45.37009 |
| 464.679 | 45.1959  |

|         |          |
|---------|----------|
| 467.179 | 45.02645 |
| 469.679 | 44.86307 |
| 472.179 | 44.70478 |
| 474.679 | 44.53338 |
| 477.179 | 44.37582 |
| 479.679 | 44.24583 |
| 482.179 | 44.09082 |
| 484.679 | 43.94355 |
| 487.179 | 43.80691 |
| 489.679 | 43.69441 |
| 492.179 | 43.56779 |
| 494.679 | 43.46053 |
| 497.179 | 43.35144 |
| 499.679 | 43.25623 |
| 502.179 | 43.13358 |
| 504.679 | 43.0392  |
| 507.179 | 42.95334 |
| 509.679 | 42.85714 |
| 512.179 | 42.77318 |
| 514.679 | 42.67589 |
| 517.179 | 42.61305 |
| 519.679 | 42.5374  |
| 522.179 | 42.49218 |
| 524.679 | 42.42121 |
| 527.179 | 42.33667 |
| 529.679 | 42.31913 |
| 532.179 | 42.27629 |
| 534.679 | 42.22148 |
| 537.179 | 42.18713 |
| 539.679 | 42.15892 |
| 542.179 | 42.1262  |
| 544.679 | 42.09098 |
| 547.179 | 42.06944 |
| 549.679 | 42.05388 |
| 552.179 | 42.0054  |
| 554.679 | 41.98218 |
| 557.179 | 41.97321 |
| 559.679 | 41.93582 |
| 562.179 | 41.9286  |
| 564.679 | 41.91254 |
| 567.179 | 41.8825  |
| 569.679 | 41.8663  |
| 572.179 | 41.85748 |
| 574.679 | 41.84635 |

|         |          |
|---------|----------|
| 577.179 | 41.84107 |
| 579.679 | 41.82482 |
| 582.179 | 41.79107 |
| 584.679 | 41.77317 |
| 587.179 | 41.77145 |
| 589.679 | 41.7517  |
| 592.179 | 41.73391 |
| 594.679 | 41.72494 |
| 597.179 | 41.69124 |
| 599.679 | 41.67884 |
| 602.179 | 41.65061 |
| 604.679 | 41.64698 |
| 607.179 | 41.61066 |
| 609.679 | 41.56068 |
| 612.179 | 41.57854 |
| 614.679 | 41.50357 |
| 617.179 | 41.48928 |
| 619.679 | 41.44843 |
| 622.179 | 41.38801 |
| 624.679 | 41.34657 |
| 627.179 | 41.298   |
| 629.679 | 41.21305 |
| 632.179 | 41.13534 |
| 634.679 | 41.06336 |
| 637.179 | 40.95488 |
| 639.679 | 40.87571 |
| 642.179 | 40.79037 |
| 644.679 | 40.68711 |
| 647.179 | 40.57338 |
| 649.679 | 40.45384 |
| 652.179 | 40.26868 |
| 654.679 | 40.15904 |
| 657.179 | 40.00824 |
| 659.679 | 39.85814 |
| 662.179 | 39.66516 |
| 664.679 | 39.49678 |
| 667.179 | 39.3083  |
| 669.679 | 39.13342 |
| 672.179 | 38.92297 |
| 674.679 | 38.70707 |
| 677.179 | 38.48403 |
| 679.679 | 38.24496 |
| 682.179 | 38.01129 |
| 684.679 | 37.75477 |

|         |          |
|---------|----------|
| 687.179 | 37.52028 |
| 689.679 | 37.25901 |
| 692.179 | 37.01081 |
| 694.679 | 36.76528 |
| 697.179 | 36.52123 |
| 699.679 | 36.27466 |
| 702.179 | 36.02626 |
| 704.679 | 35.74519 |
| 707.179 | 35.49463 |
| 709.679 | 35.24453 |
| 712.179 | 35.01063 |
| 714.679 | 34.75243 |
| 717.179 | 34.53292 |
| 719.679 | 34.31736 |
| 722.179 | 34.11616 |
| 724.679 | 33.92123 |
| 727.179 | 33.70558 |
| 729.679 | 33.56251 |
| 732.179 | 33.36701 |
| 734.679 | 33.24096 |
| 737.179 | 33.08197 |
| 739.679 | 32.94293 |
| 742.179 | 32.79099 |
| 744.679 | 32.66447 |
| 747.179 | 32.55209 |
| 749.679 | 32.43716 |
| 752.179 | 32.30958 |
| 754.679 | 32.21247 |
| 757.179 | 32.1006  |
| 759.679 | 31.9913  |
| 762.179 | 31.89574 |
| 764.679 | 31.78439 |
| 767.179 | 31.68097 |
| 769.679 | 31.59564 |
| 772.179 | 31.49673 |
| 774.679 | 31.43166 |
| 777.179 | 31.30683 |
| 779.679 | 31.22508 |
| 782.179 | 31.15714 |
| 784.679 | 31.08039 |
| 787.179 | 30.98937 |
| 789.679 | 30.89481 |
| 792.179 | 30.81444 |
| 794.679 | 30.72834 |

|         |          |
|---------|----------|
| 797.179 | 30.64504 |
| 799.679 | 30.5576  |
| 802.179 | 30.47502 |
| 804.679 | 30.38856 |
| 807.179 | 30.31067 |
| 809.679 | 30.21746 |
| 812.179 | 30.12949 |
| 814.679 | 30.04469 |
| 817.179 | 29.97932 |
| 819.679 | 29.90519 |
| 822.179 | 29.81421 |
| 824.679 | 29.73576 |
| 827.179 | 29.66271 |
| 829.679 | 29.58677 |
| 832.179 | 29.49707 |
| 834.679 | 29.43722 |
| 837.179 | 29.3487  |
| 839.679 | 29.26957 |
| 842.179 | 29.21237 |
| 844.679 | 29.15368 |
| 847.179 | 29.0733  |
| 849.679 | 28.99232 |
| 852.179 | 28.91482 |
| 854.679 | 28.8431  |
| 857.179 | 28.75699 |
| 859.679 | 28.68957 |
| 862.179 | 28.61966 |
| 864.679 | 28.55149 |
| 867.179 | 28.47625 |
| 869.679 | 28.39949 |
| 872.179 | 28.32681 |
| 874.679 | 28.25694 |
| 877.179 | 28.17326 |
| 879.679 | 28.09665 |
| 882.179 | 28.02455 |
| 884.679 | 27.95853 |
| 887.179 | 27.87651 |
| 889.679 | 27.76549 |
| 892.179 | 27.70552 |
| 894.679 | 27.64106 |
| 897.179 | 27.5679  |

tg15K/min    ##Temp./°  
C                    Mass/%

|        |         |
|--------|---------|
| 43.112 | 99.9655 |
| 43.123 | 99.9501 |
| 43.162 | 99.9381 |
| 43.282 | 99.9275 |
| 43.486 | 99.9157 |
| 43.692 | 99.9051 |
| 43.927 | 99.8939 |
| 44.168 | 99.8822 |
| 44.405 | 99.8729 |
| 44.64  | 99.8607 |
| 44.869 | 99.8468 |
| 45.116 | 99.8318 |
| 45.388 | 99.8127 |
| 45.651 | 99.7956 |
| 45.917 | 99.7781 |
| 46.172 | 99.7601 |
| 46.456 | 99.7411 |
| 46.741 | 99.7223 |
| 47.025 | 99.7032 |
| 47.309 | 99.684  |
| 47.583 | 99.6638 |
| 47.885 | 99.6438 |
| 48.167 | 99.6233 |
| 48.456 | 99.6023 |
| 48.746 | 99.581  |
| 49.033 | 99.5584 |
| 49.326 | 99.5359 |
| 49.617 | 99.513  |
| 49.908 | 99.49   |
| 50.204 | 99.4653 |
| 50.495 | 99.4409 |
| 50.788 | 99.4161 |
| 51.073 | 99.3909 |
| 51.374 | 99.364  |
| 51.67  | 99.3376 |
| 51.954 | 99.3109 |
| 52.26  | 99.2837 |
| 52.558 | 99.2549 |
| 52.836 | 99.2263 |
| 53.139 | 99.1972 |
| 53.434 | 99.1677 |
| 53.736 | 99.1363 |
| 54.03  | 99.1052 |
| 54.33  | 99.0738 |

|        |         |
|--------|---------|
| 54.622 | 99.0421 |
| 54.908 | 99.0083 |
| 55.205 | 98.9747 |
| 55.497 | 98.9406 |
| 55.795 | 98.9062 |
| 56.083 | 98.8693 |
| 56.377 | 98.833  |
| 56.677 | 98.7966 |
| 56.971 | 98.76   |
| 57.252 | 98.7212 |
| 57.542 | 98.6827 |
| 57.838 | 98.6439 |
| 58.132 | 98.6047 |
| 58.43  | 98.5633 |
| 58.714 | 98.5224 |
| 59.005 | 98.4812 |
| 59.276 | 98.4395 |
| 59.566 | 98.3956 |
| 59.847 | 98.3521 |
| 60.148 | 98.3086 |
| 60.428 | 98.2649 |
| 60.709 | 98.2197 |
| 60.99  | 98.1748 |
| 61.276 | 98.1297 |
| 61.546 | 98.0842 |
| 61.834 | 98.0376 |
| 62.109 | 97.9906 |
| 62.391 | 97.9432 |
| 62.677 | 97.8953 |
| 62.947 | 97.8453 |
| 63.223 | 97.7957 |
| 63.499 | 97.7458 |
| 63.777 | 97.6955 |
| 64.056 | 97.6435 |
| 64.328 | 97.592  |
| 64.613 | 97.5403 |
| 64.887 | 97.4884 |
| 65.151 | 97.4359 |
| 65.432 | 97.3836 |
| 65.711 | 97.3311 |
| 65.983 | 97.2785 |
| 66.243 | 97.2253 |
| 66.518 | 97.1719 |
| 66.79  | 97.1179 |

|        |         |
|--------|---------|
| 67.062 | 97.0634 |
| 67.327 | 97.007  |
| 67.607 | 96.951  |
| 67.867 | 96.8947 |
| 68.125 | 96.8382 |
| 68.387 | 96.7816 |
| 68.663 | 96.7238 |
| 68.934 | 96.6665 |
| 69.189 | 96.6094 |
| 69.463 | 96.5522 |
| 69.725 | 96.495  |
| 69.995 | 96.4377 |
| 70.26  | 96.3803 |
| 70.52  | 96.3227 |
| 70.772 | 96.2642 |
| 71.052 | 96.2057 |
| 71.312 | 96.147  |
| 71.577 | 96.088  |
| 71.838 | 96.0279 |
| 72.099 | 95.9681 |
| 72.364 | 95.9083 |
| 72.622 | 95.8486 |
| 72.879 | 95.7886 |
| 73.147 | 95.7289 |
| 73.414 | 95.6694 |
| 73.667 | 95.61   |
| 73.93  | 95.5506 |
| 74.187 | 95.4908 |
| 74.451 | 95.4307 |
| 74.71  | 95.3705 |
| 74.975 | 95.3094 |
| 75.242 | 95.2484 |
| 75.505 | 95.1873 |
| 75.754 | 95.126  |
| 76.013 | 95.0639 |
| 76.277 | 95.0022 |
| 76.54  | 94.9407 |
| 76.793 | 94.8794 |
| 77.057 | 94.8185 |
| 77.315 | 94.7577 |
| 77.587 | 94.6969 |
| 77.839 | 94.6362 |
| 78.096 | 94.5764 |
| 78.356 | 94.5159 |



|        |         |
|--------|---------|
| 78.613 | 94.4551 |
| 78.875 | 94.394  |
| 79.142 | 94.3324 |
| 79.402 | 94.271  |
| 79.651 | 94.2096 |
| 79.899 | 94.1483 |
| 80.167 | 94.0868 |
| 80.429 | 94.0257 |
| 80.691 | 93.965  |
| 80.955 | 93.9044 |
| 81.218 | 93.8446 |
| 81.47  | 93.7844 |
| 81.737 | 93.7243 |
| 81.991 | 93.664  |
| 82.248 | 93.6039 |
| 82.512 | 93.5436 |
| 82.763 | 93.4833 |
| 83.03  | 93.4231 |
| 83.301 | 93.3629 |
| 83.552 | 93.3028 |
| 83.801 | 93.2432 |
| 84.068 | 93.1838 |
| 84.324 | 93.1254 |
| 84.574 | 93.067  |
| 84.839 | 93.0087 |
| 85.102 | 92.9504 |
| 85.359 | 92.8929 |
| 85.623 | 92.8348 |
| 85.883 | 92.7765 |
| 86.143 | 92.7182 |
| 86.4   | 92.6599 |
| 86.667 | 92.6012 |
| 86.92  | 92.543  |
| 87.177 | 92.4852 |
| 87.444 | 92.4275 |
| 87.701 | 92.3707 |
| 87.959 | 92.3139 |
| 88.218 | 92.2572 |
| 88.491 | 92.2006 |
| 88.749 | 92.1449 |
| 89.018 | 92.0888 |
| 89.267 | 92.0327 |
| 89.52  | 91.9764 |
| 89.784 | 91.9204 |

|         |         |
|---------|---------|
| 90.036  | 91.8644 |
| 90.304  | 91.8084 |
| 90.567  | 91.7528 |
| 90.821  | 91.6982 |
| 91.088  | 91.6438 |
| 91.347  | 91.5897 |
| 91.613  | 91.5359 |
| 91.871  | 91.4833 |
| 92.134  | 91.4303 |
| 92.384  | 91.3773 |
| 92.647  | 91.3242 |
| 92.919  | 91.2711 |
| 93.177  | 91.2181 |
| 93.449  | 91.1653 |
| 93.694  | 91.1127 |
| 93.957  | 91.0603 |
| 94.213  | 91.0084 |
| 94.484  | 90.9568 |
| 94.738  | 90.9054 |
| 95.007  | 90.8554 |
| 95.276  | 90.8052 |
| 95.526  | 90.7554 |
| 95.796  | 90.7057 |
| 96.054  | 90.6569 |
| 96.33   | 90.6078 |
| 96.585  | 90.5585 |
| 96.844  | 90.5091 |
| 97.108  | 90.4598 |
| 97.369  | 90.4105 |
| 97.629  | 90.3615 |
| 97.899  | 90.3126 |
| 98.16   | 90.2646 |
| 98.415  | 90.2168 |
| 98.68   | 90.1693 |
| 98.949  | 90.122  |
| 99.209  | 90.0764 |
| 99.474  | 90.0302 |
| 99.734  | 89.984  |
| 100.004 | 89.9378 |
| 100.261 | 89.8924 |
| 100.529 | 89.847  |
| 100.782 | 89.8016 |
| 101.043 | 89.7561 |
| 101.305 | 89.7114 |

|         |         |
|---------|---------|
| 101.575 | 89.6668 |
| 101.833 | 89.6225 |
| 102.099 | 89.5785 |
| 102.353 | 89.5356 |
| 102.623 | 89.4926 |
| 102.879 | 89.4499 |
| 103.14  | 89.4075 |
| 103.405 | 89.3663 |
| 103.66  | 89.3247 |
| 103.935 | 89.2832 |
| 104.201 | 89.2417 |
| 104.456 | 89.2005 |
| 104.723 | 89.1591 |
| 104.984 | 89.1178 |
| 105.254 | 89.0767 |
| 105.517 | 89.0362 |
| 105.786 | 88.9959 |
| 106.038 | 88.9561 |
| 106.304 | 88.9166 |
| 106.566 | 88.8788 |
| 106.826 | 88.8406 |
| 107.092 | 88.8027 |
| 107.358 | 88.765  |
| 107.621 | 88.7282 |
| 107.876 | 88.691  |
| 108.147 | 88.6537 |
| 108.41  | 88.6163 |
| 108.677 | 88.579  |
| 108.945 | 88.542  |
| 109.2   | 88.5054 |
| 109.471 | 88.4691 |
| 109.736 | 88.4337 |
| 109.997 | 88.3984 |
| 110.259 | 88.3635 |
| 110.528 | 88.3291 |
| 110.797 | 88.295  |
| 111.048 | 88.2625 |
| 111.313 | 88.2294 |
| 111.583 | 88.196  |
| 111.837 | 88.1627 |
| 112.097 | 88.1301 |
| 112.381 | 88.0972 |
| 112.636 | 88.0642 |
| 112.904 | 88.0314 |

|         |         |
|---------|---------|
| 113.163 | 87.999  |
| 113.431 | 87.9668 |
| 113.685 | 87.9349 |
| 113.948 | 87.9032 |
| 114.22  | 87.8727 |
| 114.48  | 87.8422 |
| 114.739 | 87.8119 |
| 115.009 | 87.7818 |
| 115.275 | 87.7527 |
| 115.526 | 87.7232 |
| 115.797 | 87.6938 |
| 116.054 | 87.6644 |
| 116.324 | 87.6351 |
| 116.585 | 87.6058 |
| 116.847 | 87.5766 |
| 117.115 | 87.5475 |
| 117.381 | 87.5189 |
| 117.647 | 87.4905 |
| 117.902 | 87.4623 |
| 118.16  | 87.4343 |
| 118.431 | 87.4079 |
| 118.691 | 87.3813 |
| 118.947 | 87.3548 |
| 119.21  | 87.3283 |
| 119.468 | 87.3031 |
| 119.748 | 87.2774 |
| 120.001 | 87.2515 |
| 120.266 | 87.2257 |
| 120.529 | 87.1998 |
| 120.801 | 87.1741 |
| 121.058 | 87.1487 |
| 121.314 | 87.1235 |
| 121.586 | 87.0987 |
| 121.848 | 87.074  |
| 122.109 | 87.0496 |
| 122.368 | 87.0256 |
| 122.626 | 87.0028 |
| 122.899 | 86.9798 |
| 123.162 | 86.9568 |
| 123.422 | 86.9337 |
| 123.694 | 86.9117 |
| 123.958 | 86.8892 |
| 124.217 | 86.8663 |
| 124.477 | 86.8432 |

|         |         |
|---------|---------|
| 124.74  | 86.8199 |
| 124.994 | 86.7969 |
| 125.268 | 86.7741 |
| 125.527 | 86.7516 |
| 125.794 | 86.7296 |
| 126.053 | 86.7079 |
| 126.317 | 86.6865 |
| 126.579 | 86.6654 |
| 126.843 | 86.646  |
| 127.103 | 86.6261 |
| 127.361 | 86.6063 |
| 127.627 | 86.5867 |
| 127.888 | 86.5676 |
| 128.154 | 86.548  |
| 128.417 | 86.5281 |
| 128.683 | 86.5082 |
| 128.945 | 86.4882 |
| 129.2   | 86.4676 |
| 129.463 | 86.4471 |
| 129.724 | 86.4269 |
| 129.989 | 86.407  |
| 130.248 | 86.3879 |
| 130.511 | 86.3689 |
| 130.771 | 86.3501 |
| 131.033 | 86.3313 |
| 131.3   | 86.3141 |
| 131.552 | 86.2965 |
| 131.827 | 86.2788 |
| 132.091 | 86.2613 |
| 132.352 | 86.2441 |
| 132.608 | 86.2265 |
| 132.866 | 86.2089 |
| 133.125 | 86.1912 |
| 133.387 | 86.1731 |
| 133.654 | 86.1552 |
| 133.921 | 86.1372 |
| 134.172 | 86.1192 |
| 134.434 | 86.1011 |
| 134.696 | 86.0834 |
| 134.961 | 86.066  |
| 135.233 | 86.0487 |
| 135.485 | 86.0321 |
| 135.75  | 86.0157 |
| 136.012 | 85.9998 |

|         |         |
|---------|---------|
| 136.276 | 85.9839 |
| 136.522 | 85.9688 |
| 136.774 | 85.9534 |
| 137.04  | 85.9378 |
| 137.307 | 85.9219 |
| 137.578 | 85.9057 |
| 137.819 | 85.8896 |
| 138.087 | 85.8735 |
| 138.36  | 85.8572 |
| 138.63  | 85.8404 |
| 138.876 | 85.8242 |
| 139.133 | 85.8081 |
| 139.394 | 85.7921 |
| 139.653 | 85.7767 |
| 139.906 | 85.7614 |
| 140.172 | 85.7462 |
| 140.433 | 85.731  |
| 140.696 | 85.717  |
| 140.961 | 85.7027 |
| 141.221 | 85.6883 |
| 141.484 | 85.674  |
| 141.732 | 85.6602 |
| 141.99  | 85.6459 |
| 142.243 | 85.6314 |
| 142.486 | 85.617  |
| 142.771 | 85.602  |
| 143.027 | 85.5872 |
| 143.293 | 85.5723 |
| 143.554 | 85.5574 |
| 143.812 | 85.5423 |
| 144.063 | 85.5276 |
| 144.325 | 85.5131 |
| 144.586 | 85.4988 |
| 144.847 | 85.4851 |
| 145.11  | 85.4713 |
| 145.358 | 85.4577 |
| 145.624 | 85.4442 |
| 145.883 | 85.4313 |
| 146.136 | 85.4183 |
| 146.395 | 85.4054 |
| 146.668 | 85.3924 |
| 146.931 | 85.3795 |
| 147.183 | 85.3664 |
| 147.444 | 85.3533 |

|         |         |
|---------|---------|
| 147.709 | 85.3399 |
| 147.978 | 85.3259 |
| 148.227 | 85.3119 |
| 148.484 | 85.2979 |
| 148.739 | 85.2839 |
| 148.994 | 85.2696 |
| 149.254 | 85.256  |
| 149.521 | 85.2426 |
| 149.778 | 85.2292 |
| 150.032 | 85.2169 |
| 150.292 | 85.2044 |
| 150.553 | 85.192  |
| 150.815 | 85.1798 |
| 151.089 | 85.168  |
| 151.331 | 85.1558 |
| 151.585 | 85.1435 |
| 151.853 | 85.1311 |
| 152.115 | 85.1184 |
| 152.369 | 85.1055 |
| 152.63  | 85.0925 |
| 152.883 | 85.0795 |
| 153.137 | 85.0663 |
| 153.405 | 85.053  |
| 153.656 | 85.0403 |
| 153.919 | 85.0279 |
| 154.179 | 85.0155 |
| 154.434 | 85.0039 |
| 154.714 | 84.9919 |
| 154.941 | 84.9799 |
| 155.207 | 84.9681 |
| 155.469 | 84.9565 |
| 155.728 | 84.945  |
| 155.99  | 84.9336 |
| 156.242 | 84.9222 |
| 156.501 | 84.9112 |
| 156.77  | 84.8997 |
| 157.028 | 84.8878 |
| 157.275 | 84.8757 |
| 157.536 | 84.863  |
| 157.794 | 84.8506 |
| 158.062 | 84.8382 |
| 158.323 | 84.8258 |
| 158.572 | 84.8132 |
| 158.83  | 84.8009 |

|         |         |
|---------|---------|
| 159.089 | 84.7888 |
| 159.345 | 84.7768 |
| 159.616 | 84.7656 |
| 159.878 | 84.7542 |
| 160.119 | 84.743  |
| 160.383 | 84.7318 |
| 160.645 | 84.7214 |
| 160.895 | 84.7109 |
| 161.158 | 84.7003 |
| 161.397 | 84.6898 |
| 161.682 | 84.6794 |
| 161.923 | 84.6686 |
| 162.179 | 84.6575 |
| 162.448 | 84.6463 |
| 162.687 | 84.6344 |
| 162.953 | 84.6227 |
| 163.23  | 84.611  |
| 163.478 | 84.5993 |
| 163.736 | 84.5874 |
| 163.992 | 84.5757 |
| 164.241 | 84.5639 |
| 164.505 | 84.5523 |
| 164.772 | 84.5414 |
| 165.022 | 84.5305 |
| 165.276 | 84.5198 |
| 165.539 | 84.5092 |
| 165.796 | 84.4993 |
| 166.051 | 84.4891 |
| 166.302 | 84.4789 |
| 166.561 | 84.4687 |
| 166.831 | 84.4585 |
| 167.064 | 84.4481 |
| 167.345 | 84.4375 |
| 167.592 | 84.4266 |
| 167.861 | 84.4154 |
| 168.126 | 84.4041 |
| 168.384 | 84.3927 |
| 168.637 | 84.3811 |
| 168.893 | 84.3691 |
| 169.142 | 84.3576 |
| 169.416 | 84.3464 |
| 169.669 | 84.3354 |
| 169.923 | 84.3248 |
| 170.181 | 84.3142 |



|         |         |
|---------|---------|
| 170.43  | 84.3037 |
| 170.705 | 84.2934 |
| 170.959 | 84.2832 |
| 171.218 | 84.2737 |
| 171.477 | 84.264  |
| 171.731 | 84.2541 |
| 171.992 | 84.2443 |
| 172.253 | 84.2348 |
| 172.509 | 84.2251 |
| 172.764 | 84.2155 |
| 173.03  | 84.2059 |
| 173.285 | 84.1964 |
| 173.525 | 84.187  |
| 173.792 | 84.1777 |
| 174.047 | 84.1686 |
| 174.299 | 84.1595 |
| 174.563 | 84.1502 |
| 174.826 | 84.1406 |
| 175.079 | 84.1307 |
| 175.327 | 84.1203 |
| 175.595 | 84.1101 |
| 175.851 | 84.0998 |
| 176.111 | 84.0894 |
| 176.371 | 84.0786 |
| 176.625 | 84.0681 |
| 176.874 | 84.0577 |
| 177.14  | 84.0473 |
| 177.402 | 84.037  |
| 177.657 | 84.0267 |
| 177.921 | 84.0163 |
| 178.174 | 84.006  |
| 178.432 | 83.9959 |
| 178.686 | 83.9859 |
| 178.946 | 83.9762 |
| 179.203 | 83.9666 |
| 179.458 | 83.9576 |
| 179.714 | 83.9485 |
| 179.97  | 83.9393 |
| 180.227 | 83.9303 |
| 180.481 | 83.9214 |
| 180.744 | 83.9121 |
| 181.012 | 83.9029 |
| 181.268 | 83.8935 |
| 181.522 | 83.884  |

|         |         |
|---------|---------|
| 181.783 | 83.8747 |
| 182.038 | 83.8654 |
| 182.302 | 83.8561 |
| 182.561 | 83.8472 |
| 182.816 | 83.8382 |
| 183.073 | 83.8292 |
| 183.325 | 83.8202 |
| 183.591 | 83.8115 |
| 183.842 | 83.8025 |
| 184.096 | 83.7934 |
| 184.36  | 83.7843 |
| 184.624 | 83.7749 |
| 184.884 | 83.7654 |
| 185.134 | 83.756  |
| 185.385 | 83.7466 |
| 185.647 | 83.7373 |
| 185.9   | 83.7283 |
| 186.158 | 83.7193 |
| 186.419 | 83.7102 |
| 186.671 | 83.7016 |
| 186.925 | 83.6926 |
| 187.187 | 83.6836 |
| 187.451 | 83.6745 |
| 187.708 | 83.6651 |
| 187.962 | 83.6558 |
| 188.219 | 83.6463 |
| 188.48  | 83.6368 |
| 188.735 | 83.6276 |
| 189.004 | 83.6186 |
| 189.254 | 83.6097 |
| 189.5   | 83.6007 |
| 189.781 | 83.5922 |
| 190.035 | 83.5833 |
| 190.254 | 83.5744 |
| 190.519 | 83.5654 |
| 190.805 | 83.5564 |
| 191.042 | 83.5474 |
| 191.318 | 83.5384 |
| 191.575 | 83.5294 |
| 191.821 | 83.5202 |
| 192.093 | 83.5108 |
| 192.358 | 83.5015 |
| 192.598 | 83.4924 |
| 192.85  | 83.4828 |

|         |         |
|---------|---------|
| 193.108 | 83.4735 |
| 193.367 | 83.4643 |
| 193.625 | 83.4552 |
| 193.889 | 83.4465 |
| 194.141 | 83.4378 |
| 194.397 | 83.4289 |
| 194.658 | 83.42   |
| 194.914 | 83.4109 |
| 195.166 | 83.4017 |
| 195.426 | 83.3924 |
| 195.683 | 83.3832 |
| 195.937 | 83.374  |
| 196.193 | 83.3647 |
| 196.453 | 83.3556 |
| 196.714 | 83.3467 |
| 196.966 | 83.3379 |
| 197.223 | 83.3293 |
| 197.484 | 83.3204 |
| 197.748 | 83.3112 |
| 197.992 | 83.3021 |
| 198.262 | 83.2925 |
| 198.519 | 83.2831 |
| 198.756 | 83.2738 |
| 199.012 | 83.2646 |
| 199.272 | 83.2555 |
| 199.543 | 83.2467 |
| 199.801 | 83.2382 |
| 200.059 | 83.23   |
| 200.318 | 83.2228 |
| 200.556 | 83.2154 |
| 200.842 | 83.2079 |
| 201.088 | 83.2004 |
| 201.341 | 83.1934 |
| 201.606 | 83.1858 |
| 201.876 | 83.178  |
| 202.105 | 83.1701 |
| 202.379 | 83.1616 |
| 202.643 | 83.1533 |
| 202.893 | 83.1449 |
| 203.165 | 83.1365 |
| 203.393 | 83.1277 |
| 203.635 | 83.1189 |
| 203.905 | 83.11   |
| 204.16  | 83.1011 |

|         |         |
|---------|---------|
| 204.435 | 83.0916 |
| 204.667 | 83.0824 |
| 204.908 | 83.0733 |
| 205.181 | 83.0643 |
| 205.463 | 83.0553 |
| 205.698 | 83.0463 |
| 205.972 | 83.0372 |
| 206.251 | 83.0282 |
| 206.494 | 83.0189 |
| 206.741 | 83.0095 |
| 206.993 | 83      |
| 207.247 | 82.9905 |
| 207.507 | 82.9807 |
| 207.743 | 82.971  |
| 208.015 | 82.9614 |
| 208.258 | 82.9517 |
| 208.541 | 82.9421 |
| 208.801 | 82.9324 |
| 209.051 | 82.9226 |
| 209.31  | 82.9129 |
| 209.564 | 82.903  |
| 209.827 | 82.8933 |
| 210.077 | 82.8836 |
| 210.352 | 82.8738 |
| 210.602 | 82.8641 |
| 210.874 | 82.8543 |
| 211.105 | 82.8444 |
| 211.368 | 82.8344 |
| 211.626 | 82.8242 |
| 211.887 | 82.814  |
| 212.14  | 82.8038 |
| 212.396 | 82.7937 |
| 212.651 | 82.7836 |
| 212.911 | 82.7734 |
| 213.176 | 82.7633 |
| 213.428 | 82.7532 |
| 213.678 | 82.7432 |
| 213.947 | 82.7331 |
| 214.201 | 82.7227 |
| 214.456 | 82.7123 |
| 214.708 | 82.7019 |
| 214.963 | 82.6914 |
| 215.213 | 82.6812 |
| 215.479 | 82.6714 |

|         |         |
|---------|---------|
| 215.73  | 82.6618 |
| 215.987 | 82.6531 |
| 216.24  | 82.6441 |
| 216.515 | 82.6352 |
| 216.765 | 82.6262 |
| 217.022 | 82.6175 |
| 217.285 | 82.6083 |
| 217.546 | 82.5989 |
| 217.798 | 82.5894 |
| 218.06  | 82.5787 |
| 218.325 | 82.5683 |
| 218.567 | 82.5575 |
| 218.815 | 82.5463 |
| 219.08  | 82.5344 |
| 219.327 | 82.5227 |
| 219.589 | 82.511  |
| 219.852 | 82.4993 |
| 220.11  | 82.4871 |
| 220.373 | 82.4752 |
| 220.637 | 82.4632 |
| 220.859 | 82.4511 |
| 221.121 | 82.4389 |
| 221.398 | 82.4264 |
| 221.656 | 82.4137 |
| 221.915 | 82.401  |
| 222.179 | 82.3878 |
| 222.424 | 82.3744 |
| 222.694 | 82.361  |
| 222.95  | 82.3475 |
| 223.2   | 82.3335 |
| 223.468 | 82.3197 |
| 223.722 | 82.3059 |
| 223.98  | 82.2922 |
| 224.235 | 82.2781 |
| 224.492 | 82.2642 |
| 224.745 | 82.2502 |
| 225.013 | 82.236  |
| 225.265 | 82.2212 |
| 225.528 | 82.2063 |
| 225.788 | 82.1913 |
| 226.048 | 82.1761 |
| 226.293 | 82.1599 |
| 226.547 | 82.1439 |
| 226.82  | 82.1278 |

|         |         |
|---------|---------|
| 227.068 | 82.1115 |
| 227.333 | 82.0947 |
| 227.593 | 82.078  |
| 227.841 | 82.0611 |
| 228.094 | 82.0442 |
| 228.357 | 82.0271 |
| 228.611 | 82.0099 |
| 228.876 | 81.9926 |
| 229.132 | 81.9751 |
| 229.382 | 81.9571 |
| 229.65  | 81.939  |
| 229.901 | 81.9208 |
| 230.164 | 81.9025 |
| 230.407 | 81.8835 |
| 230.68  | 81.8645 |
| 230.935 | 81.8452 |
| 231.194 | 81.8257 |
| 231.447 | 81.8055 |
| 231.702 | 81.7853 |
| 231.965 | 81.7647 |
| 232.214 | 81.7439 |
| 232.476 | 81.7224 |
| 232.736 | 81.701  |
| 232.996 | 81.6793 |
| 233.247 | 81.6573 |
| 233.504 | 81.6346 |
| 233.765 | 81.6119 |
| 234.021 | 81.589  |
| 234.283 | 81.5658 |
| 234.545 | 81.5412 |
| 234.799 | 81.5168 |
| 235.067 | 81.4923 |
| 235.318 | 81.4676 |
| 235.575 | 81.4416 |
| 235.831 | 81.4157 |
| 236.083 | 81.3896 |
| 236.342 | 81.3633 |
| 236.595 | 81.3367 |
| 236.854 | 81.3086 |
| 237.12  | 81.2806 |
| 237.371 | 81.2523 |
| 237.612 | 81.2238 |
| 237.876 | 81.1938 |
| 238.129 | 81.1643 |

|         |         |
|---------|---------|
| 238.391 | 81.1345 |
| 238.642 | 81.1046 |
| 238.902 | 81.0736 |
| 239.163 | 81.0427 |
| 239.418 | 81.0114 |
| 239.674 | 80.9798 |
| 239.932 | 80.9467 |
| 240.191 | 80.9137 |
| 240.447 | 80.8803 |
| 240.702 | 80.8467 |
| 240.958 | 80.8115 |
| 241.213 | 80.7765 |
| 241.467 | 80.7413 |
| 241.718 | 80.7057 |
| 241.973 | 80.6684 |
| 242.235 | 80.631  |
| 242.498 | 80.5932 |
| 242.749 | 80.555  |
| 243.008 | 80.5142 |
| 243.261 | 80.4736 |
| 243.515 | 80.4324 |
| 243.756 | 80.3908 |
| 244.021 | 80.3468 |
| 244.28  | 80.3033 |
| 244.543 | 80.2594 |
| 244.793 | 80.2152 |
| 245.043 | 80.1687 |
| 245.304 | 80.1224 |
| 245.563 | 80.0755 |
| 245.811 | 80.028  |
| 246.075 | 79.9778 |
| 246.329 | 79.9279 |
| 246.585 | 79.8772 |
| 246.839 | 79.8257 |
| 247.087 | 79.771  |
| 247.35  | 79.7161 |
| 247.602 | 79.6599 |
| 247.855 | 79.6026 |
| 248.117 | 79.5398 |
| 248.376 | 79.4771 |
| 248.631 | 79.413  |
| 248.893 | 79.3476 |
| 249.143 | 79.2754 |
| 249.398 | 79.2047 |

|         |         |
|---------|---------|
| 249.649 | 79.1329 |
| 249.906 | 79.0599 |
| 250.157 | 78.9808 |
| 250.414 | 78.9026 |
| 250.674 | 78.8231 |
| 250.92  | 78.7423 |
| 251.18  | 78.6554 |
| 251.434 | 78.5696 |
| 251.686 | 78.4828 |
| 251.943 | 78.395  |
| 252.2   | 78.3025 |
| 252.466 | 78.2116 |
| 252.719 | 78.1201 |
| 252.978 | 78.0278 |
| 253.221 | 77.9324 |
| 253.476 | 77.8373 |
| 253.748 | 77.7415 |
| 254.001 | 77.6445 |
| 254.256 | 77.5469 |
| 254.513 | 77.4456 |
| 254.764 | 77.345  |
| 255.029 | 77.2437 |
| 255.28  | 77.1421 |
| 255.54  | 77.0378 |
| 255.801 | 76.9342 |
| 256.065 | 76.8301 |
| 256.317 | 76.7257 |
| 256.566 | 76.6194 |
| 256.827 | 76.5131 |
| 257.094 | 76.4063 |
| 257.353 | 76.2991 |
| 257.607 | 76.1898 |
| 257.858 | 76.0809 |
| 258.114 | 75.9718 |
| 258.378 | 75.8625 |
| 258.634 | 75.7519 |
| 258.888 | 75.6415 |
| 259.149 | 75.531  |
| 259.399 | 75.4203 |
| 259.659 | 75.3089 |
| 259.915 | 75.1976 |
| 260.169 | 75.0861 |
| 260.433 | 74.9746 |
| 260.688 | 74.8623 |



|         |         |
|---------|---------|
| 260.942 | 74.7501 |
| 261.202 | 74.638  |
| 261.458 | 74.5259 |
| 261.722 | 74.4131 |
| 261.975 | 74.3007 |
| 262.236 | 74.1884 |
| 262.49  | 74.0762 |
| 262.744 | 73.9638 |
| 263.005 | 73.8512 |
| 263.266 | 73.7384 |
| 263.53  | 73.6254 |
| 263.785 | 73.5119 |
| 264.035 | 73.3986 |
| 264.293 | 73.2853 |
| 264.547 | 73.172  |
| 264.807 | 73.0585 |
| 265.069 | 72.9455 |
| 265.318 | 72.8327 |
| 265.578 | 72.7201 |
| 265.828 | 72.6086 |
| 266.09  | 72.4971 |
| 266.355 | 72.386  |
| 266.605 | 72.2753 |
| 266.856 | 72.1661 |
| 267.117 | 72.0566 |
| 267.37  | 71.9473 |
| 267.625 | 71.8384 |
| 267.888 | 71.731  |
| 268.135 | 71.6233 |
| 268.388 | 71.5159 |
| 268.645 | 71.4086 |
| 268.907 | 71.3027 |
| 269.16  | 71.1966 |
| 269.415 | 71.0908 |
| 269.67  | 70.9851 |
| 269.93  | 70.8804 |
| 270.186 | 70.7756 |
| 270.433 | 70.6712 |
| 270.69  | 70.567  |
| 270.944 | 70.464  |
| 271.205 | 70.361  |
| 271.455 | 70.2585 |
| 271.715 | 70.1564 |
| 271.965 | 70.0558 |

|         |         |
|---------|---------|
| 272.221 | 69.955  |
| 272.479 | 69.8544 |
| 272.733 | 69.7542 |
| 272.982 | 69.6552 |
| 273.243 | 69.5559 |
| 273.49  | 69.457  |
| 273.745 | 69.3583 |
| 274.01  | 69.2608 |
| 274.257 | 69.1635 |
| 274.518 | 69.0665 |
| 274.772 | 68.9697 |
| 275.024 | 68.8741 |
| 275.272 | 68.7782 |
| 275.526 | 68.6822 |
| 275.777 | 68.5863 |
| 276.031 | 68.4907 |
| 276.288 | 68.3949 |
| 276.542 | 68.2996 |
| 276.799 | 68.2048 |
| 277.045 | 68.1111 |
| 277.307 | 68.0175 |
| 277.551 | 67.9246 |
| 277.817 | 67.8324 |
| 278.061 | 67.7405 |
| 278.307 | 67.6511 |
| 278.567 | 67.5613 |
| 278.832 | 67.4717 |
| 279.084 | 67.3823 |
| 279.33  | 67.2946 |
| 279.583 | 67.2065 |
| 279.832 | 67.1186 |
| 280.089 | 67.031  |
| 280.343 | 66.9447 |
| 280.607 | 66.8585 |
| 280.851 | 66.7728 |
| 281.1   | 66.6874 |
| 281.36  | 66.6037 |
| 281.608 | 66.5197 |
| 281.863 | 66.4359 |
| 282.114 | 66.3522 |
| 282.364 | 66.2699 |
| 282.621 | 66.1875 |
| 282.877 | 66.1054 |
| 283.126 | 66.0236 |

|         |         |
|---------|---------|
| 283.372 | 65.9432 |
| 283.628 | 65.8626 |
| 283.886 | 65.7823 |
| 284.147 | 65.7023 |
| 284.399 | 65.6231 |
| 284.643 | 65.5434 |
| 284.9   | 65.4639 |
| 285.147 | 65.3844 |
| 285.414 | 65.3049 |
| 285.665 | 65.2256 |
| 285.917 | 65.1467 |
| 286.17  | 65.0682 |
| 286.419 | 64.9906 |
| 286.675 | 64.9132 |
| 286.927 | 64.8363 |
| 287.174 | 64.7599 |
| 287.431 | 64.6852 |
| 287.69  | 64.61   |
| 287.938 | 64.5353 |
| 288.193 | 64.4609 |
| 288.442 | 64.3881 |
| 288.697 | 64.3154 |
| 288.948 | 64.243  |
| 289.199 | 64.171  |
| 289.456 | 64.1008 |
| 289.713 | 64.03   |
| 289.966 | 63.9594 |
| 290.217 | 63.889  |
| 290.473 | 63.82   |
| 290.714 | 63.7507 |
| 290.97  | 63.6816 |
| 291.227 | 63.6129 |
| 291.473 | 63.5452 |
| 291.724 | 63.4772 |
| 291.975 | 63.4094 |
| 292.237 | 63.3418 |
| 292.485 | 63.2748 |
| 292.733 | 63.2076 |
| 292.991 | 63.1405 |
| 293.245 | 63.0733 |
| 293.491 | 63.0069 |
| 293.754 | 62.9405 |
| 294.008 | 62.8745 |
| 294.251 | 62.8088 |

|         |         |
|---------|---------|
| 294.502 | 62.7443 |
| 294.752 | 62.6799 |
| 295.012 | 62.6161 |
| 295.27  | 62.553  |
| 295.527 | 62.4903 |
| 295.757 | 62.4294 |
| 296.01  | 62.368  |
| 296.269 | 62.3066 |
| 296.526 | 62.2454 |
| 296.776 | 62.1854 |
| 297.027 | 62.1254 |
| 297.275 | 62.0658 |
| 297.529 | 62.0065 |
| 297.781 | 61.9486 |
| 298.034 | 61.8904 |
| 298.288 | 61.8326 |
| 298.537 | 61.7751 |
| 298.798 | 61.7188 |
| 299.039 | 61.6621 |
| 299.29  | 61.6056 |
| 299.551 | 61.5491 |
| 299.795 | 61.493  |
| 300.047 | 61.4366 |
| 300.296 | 61.3801 |
| 300.557 | 61.3235 |
| 300.8   | 61.2669 |
| 301.052 | 61.2107 |
| 301.318 | 61.1548 |
| 301.564 | 61.0993 |
| 301.811 | 61.0453 |
| 302.061 | 60.9914 |
| 302.315 | 60.9378 |
| 302.574 | 60.8846 |
| 302.824 | 60.8337 |
| 303.076 | 60.7821 |
| 303.332 | 60.7308 |
| 303.588 | 60.6797 |
| 303.83  | 60.6297 |
| 304.083 | 60.5795 |
| 304.33  | 60.5294 |
| 304.601 | 60.4794 |
| 304.85  | 60.4303 |
| 305.083 | 60.3812 |
| 305.342 | 60.3323 |

|         |         |
|---------|---------|
| 305.6   | 60.2837 |
| 305.849 | 60.2363 |
| 306.095 | 60.1889 |
| 306.355 | 60.142  |
| 306.604 | 60.0952 |
| 306.861 | 60.0493 |
| 307.099 | 60.0027 |
| 307.351 | 59.9558 |
| 307.614 | 59.9088 |
| 307.844 | 59.8616 |
| 308.123 | 59.8147 |
| 308.365 | 59.7681 |
| 308.615 | 59.7217 |
| 308.861 | 59.6759 |
| 309.117 | 59.6301 |
| 309.388 | 59.5848 |
| 309.643 | 59.5397 |
| 309.869 | 59.4963 |
| 310.125 | 59.4527 |
| 310.38  | 59.4093 |
| 310.617 | 59.3662 |
| 310.884 | 59.3246 |
| 311.135 | 59.2826 |
| 311.352 | 59.2406 |
| 311.622 | 59.1986 |
| 311.894 | 59.1576 |
| 312.131 | 59.1165 |
| 312.395 | 59.0755 |
| 312.648 | 59.0346 |
| 312.913 | 58.9949 |
| 313.151 | 58.955  |
| 313.39  | 58.9151 |
| 313.649 | 58.8755 |
| 313.888 | 58.8363 |
| 314.154 | 58.7967 |
| 314.41  | 58.757  |
| 314.65  | 58.7172 |
| 314.9   | 58.6769 |
| 315.159 | 58.6369 |
| 315.394 | 58.5971 |
| 315.657 | 58.5574 |
| 315.911 | 58.5185 |
| 316.143 | 58.4797 |
| 316.406 | 58.4414 |

|         |         |
|---------|---------|
| 316.66  | 58.4034 |
| 316.917 | 58.3669 |
| 317.174 | 58.3298 |
| 317.416 | 58.2928 |
| 317.673 | 58.2562 |
| 317.924 | 58.2205 |
| 318.172 | 58.1846 |
| 318.438 | 58.1489 |
| 318.657 | 58.1135 |
| 318.936 | 58.0782 |
| 319.182 | 58.0436 |
| 319.43  | 58.0089 |
| 319.672 | 57.9742 |
| 319.932 | 57.9395 |
| 320.183 | 57.9053 |
| 320.463 | 57.871  |
| 320.698 | 57.8366 |
| 320.95  | 57.8021 |
| 321.207 | 57.7677 |
| 321.445 | 57.733  |
| 321.705 | 57.6983 |
| 321.958 | 57.6637 |
| 322.198 | 57.6288 |
| 322.462 | 57.5944 |
| 322.712 | 57.5604 |
| 322.961 | 57.5267 |
| 323.208 | 57.494  |
| 323.481 | 57.4613 |
| 323.722 | 57.4288 |
| 323.962 | 57.3965 |
| 324.215 | 57.3652 |
| 324.462 | 57.3336 |
| 324.706 | 57.302  |
| 324.97  | 57.2705 |
| 325.22  | 57.2396 |
| 325.47  | 57.2087 |
| 325.726 | 57.178  |
| 325.976 | 57.1474 |
| 326.227 | 57.1174 |
| 326.472 | 57.087  |
| 326.73  | 57.0567 |
| 326.982 | 57.0264 |
| 327.233 | 56.9957 |
| 327.485 | 56.9651 |

|         |         |
|---------|---------|
| 327.735 | 56.9346 |
| 327.985 | 56.904  |
| 328.229 | 56.8729 |
| 328.5   | 56.842  |
| 328.745 | 56.8113 |
| 328.996 | 56.7808 |
| 329.253 | 56.7505 |
| 329.496 | 56.7204 |
| 329.755 | 56.6908 |
| 329.997 | 56.6613 |
| 330.264 | 56.6329 |
| 330.499 | 56.6043 |
| 330.755 | 56.5759 |
| 331.006 | 56.5477 |
| 331.256 | 56.5201 |
| 331.508 | 56.4923 |
| 331.761 | 56.4646 |
| 332.009 | 56.4369 |
| 332.254 | 56.4098 |
| 332.516 | 56.3825 |
| 332.771 | 56.3552 |
| 333.011 | 56.3281 |
| 333.261 | 56.3012 |
| 333.507 | 56.2742 |
| 333.763 | 56.2472 |
| 334.011 | 56.2201 |
| 334.259 | 56.1927 |
| 334.509 | 56.1653 |
| 334.763 | 56.1378 |
| 335.012 | 56.1104 |
| 335.266 | 56.0825 |
| 335.513 | 56.0546 |
| 335.774 | 56.0271 |
| 336.012 | 56      |
| 336.269 | 55.973  |
| 336.512 | 55.9462 |
| 336.776 | 55.9198 |
| 337.023 | 55.8937 |
| 337.269 | 55.8678 |
| 337.53  | 55.8426 |
| 337.781 | 55.8173 |
| 338.017 | 55.7919 |
| 338.278 | 55.7665 |
| 338.53  | 55.7417 |

|         |         |
|---------|---------|
| 338.778 | 55.7169 |
| 339.034 | 55.6924 |
| 339.28  | 55.6679 |
| 339.524 | 55.6437 |
| 339.779 | 55.6195 |
| 340.029 | 55.5955 |
| 340.273 | 55.5713 |
| 340.526 | 55.5468 |
| 340.788 | 55.5221 |
| 341.033 | 55.4974 |
| 341.282 | 55.4725 |
| 341.537 | 55.4469 |
| 341.794 | 55.4216 |
| 342.033 | 55.3965 |
| 342.288 | 55.3714 |
| 342.547 | 55.3465 |
| 342.788 | 55.3217 |
| 343.045 | 55.2969 |
| 343.283 | 55.2723 |
| 343.535 | 55.2485 |
| 343.786 | 55.2246 |
| 344.035 | 55.201  |
| 344.293 | 55.1776 |
| 344.552 | 55.1551 |
| 344.786 | 55.1322 |
| 345.038 | 55.1092 |
| 345.288 | 55.0863 |
| 345.539 | 55.064  |
| 345.789 | 55.0417 |
| 346.033 | 55.0195 |
| 346.284 | 54.9974 |
| 346.535 | 54.9759 |
| 346.784 | 54.9541 |
| 347.035 | 54.9319 |
| 347.286 | 54.9095 |
| 347.527 | 54.8868 |
| 347.792 | 54.8641 |
| 348.018 | 54.8413 |
| 348.283 | 54.8184 |
| 348.537 | 54.7947 |
| 348.776 | 54.7716 |
| 349.018 | 54.7487 |
| 349.274 | 54.7259 |
| 349.54  | 54.7036 |



|         |         |
|---------|---------|
| 349.772 | 54.6813 |
| 350.032 | 54.6594 |
| 350.275 | 54.6377 |
| 350.522 | 54.6172 |
| 350.78  | 54.5963 |
| 351.034 | 54.5754 |
| 351.281 | 54.5545 |
| 351.531 | 54.5345 |
| 351.777 | 54.5141 |
| 352.028 | 54.4936 |
| 352.284 | 54.4732 |
| 352.524 | 54.4529 |
| 352.767 | 54.4325 |
| 353.034 | 54.4122 |
| 353.275 | 54.3921 |
| 353.526 | 54.372  |
| 353.782 | 54.352  |
| 354.025 | 54.332  |
| 354.273 | 54.3121 |
| 354.518 | 54.2926 |
| 354.768 | 54.2731 |
| 355.028 | 54.2536 |
| 355.264 | 54.234  |
| 355.52  | 54.2145 |
| 355.77  | 54.1946 |
| 356.017 | 54.1745 |
| 356.27  | 54.1542 |
| 356.518 | 54.133  |
| 356.76  | 54.1122 |
| 357.007 | 54.0915 |
| 357.264 | 54.0708 |
| 357.509 | 54.0501 |
| 357.754 | 54.0298 |
| 358.016 | 54.01   |
| 358.26  | 53.9904 |
| 358.515 | 53.972  |
| 358.763 | 53.9534 |
| 359.007 | 53.9348 |
| 359.258 | 53.9164 |
| 359.512 | 53.8982 |
| 359.762 | 53.8805 |
| 360.006 | 53.8627 |
| 360.244 | 53.845  |
| 360.505 | 53.8272 |

|         |         |
|---------|---------|
| 360.752 | 53.8096 |
| 361.001 | 53.7921 |
| 361.257 | 53.7746 |
| 361.503 | 53.7569 |
| 361.755 | 53.7388 |
| 361.996 | 53.7205 |
| 362.249 | 53.7019 |
| 362.495 | 53.683  |
| 362.738 | 53.6634 |
| 362.994 | 53.6445 |
| 363.241 | 53.6255 |
| 363.491 | 53.6067 |
| 363.742 | 53.5884 |
| 363.988 | 53.5702 |
| 364.238 | 53.5521 |
| 364.489 | 53.5341 |
| 364.732 | 53.5169 |
| 364.99  | 53.4997 |
| 365.223 | 53.4826 |
| 365.48  | 53.4657 |
| 365.726 | 53.4496 |
| 365.979 | 53.4333 |
| 366.223 | 53.4169 |
| 366.477 | 53.4006 |
| 366.725 | 53.3844 |
| 366.976 | 53.3682 |
| 367.223 | 53.3521 |
| 367.475 | 53.3362 |
| 367.708 | 53.3197 |
| 367.981 | 53.3031 |
| 368.217 | 53.2864 |
| 368.456 | 53.2695 |
| 368.713 | 53.2521 |
| 368.975 | 53.2347 |
| 369.228 | 53.2172 |
| 369.453 | 53.1998 |
| 369.702 | 53.1826 |
| 369.958 | 53.1656 |
| 370.212 | 53.149  |
| 370.467 | 53.1326 |
| 370.712 | 53.1174 |
| 370.964 | 53.1018 |
| 371.211 | 53.0862 |
| 371.457 | 53.0707 |

|         |         |
|---------|---------|
| 371.708 | 53.0562 |
| 371.953 | 53.0414 |
| 372.204 | 53.0267 |
| 372.454 | 53.0121 |
| 372.708 | 52.9979 |
| 372.943 | 52.9835 |
| 373.19  | 52.969  |
| 373.446 | 52.9548 |
| 373.681 | 52.9405 |
| 373.929 | 52.9263 |
| 374.191 | 52.9122 |
| 374.433 | 52.898  |
| 374.688 | 52.8835 |
| 374.93  | 52.8688 |
| 375.19  | 52.8539 |
| 375.426 | 52.8388 |
| 375.682 | 52.8227 |
| 375.936 | 52.8071 |
| 376.179 | 52.7914 |
| 376.429 | 52.7759 |
| 376.681 | 52.7606 |
| 376.933 | 52.7457 |
| 377.187 | 52.7309 |
| 377.428 | 52.7166 |
| 377.678 | 52.7025 |
| 377.943 | 52.6893 |
| 378.179 | 52.6758 |
| 378.422 | 52.6622 |
| 378.668 | 52.6488 |
| 378.917 | 52.636  |
| 379.161 | 52.623  |
| 379.412 | 52.61   |
| 379.676 | 52.5973 |
| 379.923 | 52.5849 |
| 380.163 | 52.5723 |
| 380.427 | 52.5596 |
| 380.681 | 52.5469 |
| 380.928 | 52.5345 |
| 381.162 | 52.5221 |
| 381.413 | 52.5097 |
| 381.665 | 52.4974 |
| 381.928 | 52.4852 |
| 382.172 | 52.4727 |
| 382.412 | 52.4599 |

|         |         |
|---------|---------|
| 382.66  | 52.4468 |
| 382.917 | 52.4331 |
| 383.171 | 52.4195 |
| 383.426 | 52.4061 |
| 383.669 | 52.3927 |
| 383.907 | 52.3791 |
| 384.155 | 52.3659 |
| 384.42  | 52.3528 |
| 384.654 | 52.3399 |
| 384.919 | 52.3279 |
| 385.153 | 52.3157 |
| 385.41  | 52.3037 |
| 385.639 | 52.2917 |
| 385.908 | 52.2803 |
| 386.155 | 52.2688 |
| 386.4   | 52.2574 |
| 386.653 | 52.246  |
| 386.893 | 52.2349 |
| 387.152 | 52.2236 |
| 387.399 | 52.2122 |
| 387.651 | 52.2009 |
| 387.902 | 52.1895 |
| 388.149 | 52.1781 |
| 388.4   | 52.1666 |
| 388.658 | 52.1552 |
| 388.907 | 52.1432 |
| 389.154 | 52.1311 |
| 389.394 | 52.1189 |
| 389.645 | 52.1066 |
| 389.903 | 52.0939 |
| 390.146 | 52.0815 |
| 390.396 | 52.0692 |
| 390.646 | 52.0568 |
| 390.903 | 52.0451 |
| 391.144 | 52.0334 |
| 391.401 | 52.0219 |
| 391.648 | 52.0106 |
| 391.903 | 52      |
| 392.135 | 51.9892 |
| 392.397 | 51.9786 |
| 392.642 | 51.968  |
| 392.897 | 51.958  |
| 393.152 | 51.9478 |
| 393.395 | 51.9375 |

|         |         |
|---------|---------|
| 393.643 | 51.9271 |
| 393.888 | 51.917  |
| 394.139 | 51.9069 |
| 394.394 | 51.8968 |
| 394.639 | 51.8867 |
| 394.888 | 51.8767 |
| 395.136 | 51.8666 |
| 395.391 | 51.8562 |
| 395.633 | 51.8456 |
| 395.877 | 51.8346 |
| 396.134 | 51.8234 |
| 396.391 | 51.8121 |
| 396.638 | 51.8007 |
| 396.883 | 51.7887 |
| 397.137 | 51.7771 |
| 397.388 | 51.7656 |
| 397.631 | 51.7542 |
| 397.878 | 51.7434 |
| 398.137 | 51.7326 |
| 398.383 | 51.7219 |
| 398.63  | 51.7113 |
| 398.887 | 51.7012 |
| 399.132 | 51.6909 |
| 399.372 | 51.6805 |
| 399.618 | 51.6704 |
| 399.883 | 51.6604 |
| 400.122 | 51.6505 |
| 400.367 | 51.6407 |
| 400.599 | 51.6311 |
| 400.864 | 51.6215 |
| 401.113 | 51.6123 |
| 401.371 | 51.6028 |
| 401.623 | 51.5931 |
| 401.853 | 51.5834 |
| 402.106 | 51.5735 |
| 402.353 | 51.5637 |
| 402.607 | 51.554  |
| 402.851 | 51.5442 |
| 403.101 | 51.5342 |
| 403.351 | 51.524  |
| 403.598 | 51.5135 |
| 403.84  | 51.5028 |
| 404.093 | 51.4912 |
| 404.336 | 51.4798 |

|         |         |
|---------|---------|
| 404.591 | 51.4683 |
| 404.833 | 51.4567 |
| 405.089 | 51.4444 |
| 405.333 | 51.4325 |
| 405.585 | 51.421  |
| 405.831 | 51.4098 |
| 406.091 | 51.3991 |
| 406.329 | 51.3885 |
| 406.575 | 51.3779 |
| 406.829 | 51.3674 |
| 407.077 | 51.3578 |
| 407.325 | 51.3477 |
| 407.568 | 51.3374 |
| 407.824 | 51.3272 |
| 408.073 | 51.3168 |
| 408.319 | 51.3065 |
| 408.572 | 51.2962 |
| 408.825 | 51.2859 |
| 409.066 | 51.2751 |
| 409.318 | 51.2641 |
| 409.555 | 51.2528 |
| 409.811 | 51.2412 |
| 410.065 | 51.2286 |
| 410.316 | 51.2163 |
| 410.565 | 51.2041 |
| 410.818 | 51.1919 |
| 411.064 | 51.1794 |
| 411.313 | 51.1675 |
| 411.559 | 51.1559 |
| 411.805 | 51.1444 |
| 412.056 | 51.1336 |
| 412.306 | 51.1226 |
| 412.552 | 51.1115 |
| 412.802 | 51.1005 |
| 413.052 | 51.0899 |
| 413.298 | 51.0791 |
| 413.544 | 51.0682 |
| 413.799 | 51.0572 |
| 414.049 | 51.0461 |
| 414.297 | 51.0351 |
| 414.551 | 51.0242 |
| 414.801 | 51.0132 |
| 415.039 | 51.0023 |
| 415.287 | 50.9916 |

|         |         |
|---------|---------|
| 415.542 | 50.9808 |
| 415.798 | 50.9699 |
| 416.045 | 50.9591 |
| 416.29  | 50.9478 |
| 416.545 | 50.9363 |
| 416.787 | 50.9245 |
| 417.036 | 50.9126 |
| 417.288 | 50.8997 |
| 417.536 | 50.8871 |
| 417.783 | 50.8746 |
| 418.036 | 50.8619 |
| 418.29  | 50.8487 |
| 418.533 | 50.8357 |
| 418.778 | 50.8228 |
| 419.032 | 50.8101 |
| 419.282 | 50.7974 |
| 419.528 | 50.7851 |
| 419.784 | 50.7729 |
| 420.031 | 50.7607 |
| 420.281 | 50.7493 |
| 420.521 | 50.7375 |
| 420.775 | 50.7257 |
| 421.026 | 50.7139 |
| 421.278 | 50.7022 |
| 421.527 | 50.6904 |
| 421.772 | 50.6785 |
| 422.024 | 50.6666 |
| 422.273 | 50.6545 |
| 422.527 | 50.6424 |
| 422.769 | 50.6304 |
| 423.026 | 50.6183 |
| 423.279 | 50.6061 |
| 423.525 | 50.594  |
| 423.775 | 50.582  |
| 424.024 | 50.5702 |
| 424.271 | 50.5582 |
| 424.518 | 50.546  |
| 424.765 | 50.5337 |
| 425.015 | 50.5209 |
| 425.267 | 50.5074 |
| 425.515 | 50.4938 |
| 425.774 | 50.4802 |
| 426.015 | 50.4665 |
| 426.268 | 50.4518 |

|         |         |
|---------|---------|
| 426.517 | 50.4375 |
| 426.769 | 50.4235 |
| 427.015 | 50.4096 |
| 427.266 | 50.3958 |
| 427.51  | 50.3821 |
| 427.766 | 50.3686 |
| 428.016 | 50.3551 |
| 428.266 | 50.3424 |
| 428.511 | 50.3296 |
| 428.758 | 50.3169 |
| 429.007 | 50.3041 |
| 429.257 | 50.2915 |
| 429.504 | 50.2787 |
| 429.754 | 50.2658 |
| 430.007 | 50.2528 |
| 430.255 | 50.2393 |
| 430.499 | 50.2262 |
| 430.746 | 50.2131 |
| 430.997 | 50.1999 |
| 431.241 | 50.1869 |
| 431.484 | 50.1736 |
| 431.741 | 50.1603 |
| 431.991 | 50.1472 |
| 432.238 | 50.1338 |
| 432.485 | 50.1203 |
| 432.734 | 50.1068 |
| 432.982 | 50.0932 |
| 433.233 | 50.0788 |
| 433.477 | 50.0645 |
| 433.724 | 50.0499 |
| 433.979 | 50.0352 |
| 434.217 | 50.0194 |
| 434.472 | 50.0041 |
| 434.723 | 49.9886 |
| 434.966 | 49.9732 |
| 435.224 | 49.958  |
| 435.464 | 49.943  |
| 435.717 | 49.9282 |
| 435.962 | 49.9136 |
| 436.208 | 49.8998 |
| 436.457 | 49.8854 |
| 436.701 | 49.871  |
| 436.952 | 49.8566 |
| 437.2   | 49.8424 |



|         |         |
|---------|---------|
| 437.451 | 49.828  |
| 437.711 | 49.8135 |
| 437.954 | 49.799  |
| 438.202 | 49.7844 |
| 438.451 | 49.7696 |
| 438.702 | 49.7549 |
| 438.944 | 49.7403 |
| 439.191 | 49.7255 |
| 439.442 | 49.7108 |
| 439.696 | 49.696  |
| 439.951 | 49.6812 |
| 440.202 | 49.6664 |
| 440.445 | 49.6514 |
| 440.69  | 49.6361 |
| 440.942 | 49.6205 |
| 441.188 | 49.6047 |
| 441.448 | 49.5881 |
| 441.696 | 49.5715 |
| 441.948 | 49.5545 |
| 442.198 | 49.5373 |
| 442.442 | 49.5192 |
| 442.693 | 49.5014 |
| 442.938 | 49.4838 |
| 443.188 | 49.4662 |
| 443.444 | 49.4485 |
| 443.687 | 49.4311 |
| 443.942 | 49.4138 |
| 444.187 | 49.3965 |
| 444.438 | 49.3796 |
| 444.694 | 49.3625 |
| 444.936 | 49.3455 |
| 445.189 | 49.3284 |
| 445.44  | 49.3111 |
| 445.69  | 49.2936 |
| 445.943 | 49.276  |
| 446.18  | 49.2583 |
| 446.431 | 49.2401 |
| 446.691 | 49.2223 |
| 446.932 | 49.2045 |
| 447.18  | 49.1867 |
| 447.436 | 49.1686 |
| 447.691 | 49.1505 |
| 447.936 | 49.1323 |
| 448.185 | 49.1141 |

|         |         |
|---------|---------|
| 448.435 | 49.0955 |
| 448.691 | 49.077  |
| 448.938 | 49.0585 |
| 449.193 | 49.04   |
| 449.443 | 49.0215 |
| 449.686 | 49.0028 |
| 449.939 | 48.9839 |
| 450.184 | 48.9649 |
| 450.433 | 48.9455 |
| 450.69  | 48.9261 |
| 450.936 | 48.9066 |
| 451.188 | 48.8871 |
| 451.439 | 48.8675 |
| 451.686 | 48.8482 |
| 451.933 | 48.8292 |
| 452.185 | 48.8104 |
| 452.441 | 48.7927 |
| 452.68  | 48.7748 |
| 452.937 | 48.757  |
| 453.189 | 48.7395 |
| 453.44  | 48.7233 |
| 453.684 | 48.7069 |
| 453.934 | 48.6906 |
| 454.184 | 48.6744 |
| 454.432 | 48.659  |
| 454.68  | 48.6433 |
| 454.936 | 48.6278 |
| 455.17  | 48.6122 |
| 455.438 | 48.597  |
| 455.677 | 48.582  |
| 455.924 | 48.5671 |
| 456.179 | 48.5523 |
| 456.424 | 48.5377 |
| 456.668 | 48.5231 |
| 456.919 | 48.5085 |
| 457.169 | 48.4939 |
| 457.415 | 48.4796 |
| 457.667 | 48.4654 |
| 457.914 | 48.451  |
| 458.165 | 48.4364 |
| 458.412 | 48.422  |
| 458.662 | 48.4073 |
| 458.903 | 48.3923 |
| 459.147 | 48.3772 |

|         |         |
|---------|---------|
| 459.4   | 48.3614 |
| 459.645 | 48.3455 |
| 459.897 | 48.3293 |
| 460.14  | 48.3127 |
| 460.39  | 48.2957 |
| 460.637 | 48.2791 |
| 460.891 | 48.2625 |
| 461.129 | 48.2459 |
| 461.381 | 48.2294 |
| 461.626 | 48.2129 |
| 461.869 | 48.1967 |
| 462.118 | 48.1805 |
| 462.37  | 48.1644 |
| 462.62  | 48.1482 |
| 462.864 | 48.1318 |
| 463.105 | 48.1155 |
| 463.349 | 48.0992 |
| 463.6   | 48.0828 |
| 463.844 | 48.0663 |
| 464.087 | 48.0498 |
| 464.337 | 48.033  |
| 464.581 | 48.0161 |
| 464.835 | 47.999  |
| 465.082 | 47.9819 |
| 465.33  | 47.9647 |
| 465.57  | 47.9467 |
| 465.821 | 47.9289 |
| 466.062 | 47.9112 |
| 466.311 | 47.8933 |
| 466.558 | 47.8752 |
| 466.795 | 47.8573 |
| 467.042 | 47.8392 |
| 467.292 | 47.821  |
| 467.535 | 47.8024 |
| 467.787 | 47.7839 |
| 468.033 | 47.7652 |
| 468.27  | 47.7462 |
| 468.51  | 47.7261 |
| 468.773 | 47.7062 |
| 469.011 | 47.6859 |
| 469.253 | 47.6655 |
| 469.505 | 47.6436 |
| 469.754 | 47.6221 |
| 469.996 | 47.6006 |

|         |         |
|---------|---------|
| 470.242 | 47.579  |
| 470.489 | 47.5569 |
| 470.735 | 47.5354 |
| 470.981 | 47.514  |
| 471.227 | 47.4925 |
| 471.47  | 47.4718 |
| 471.712 | 47.451  |
| 471.958 | 47.4302 |
| 472.207 | 47.4092 |
| 472.457 | 47.3885 |
| 472.695 | 47.3676 |
| 472.945 | 47.3467 |
| 473.19  | 47.3258 |
| 473.433 | 47.3045 |
| 473.674 | 47.2834 |
| 473.918 | 47.2624 |
| 474.169 | 47.2413 |
| 474.406 | 47.2201 |
| 474.648 | 47.1987 |
| 474.892 | 47.1774 |
| 475.144 | 47.1561 |
| 475.386 | 47.1346 |
| 475.631 | 47.1131 |
| 475.874 | 47.0916 |
| 476.114 | 47.0699 |
| 476.359 | 47.048  |
| 476.606 | 47.0259 |
| 476.852 | 47.0039 |
| 477.099 | 46.982  |
| 477.343 | 46.9601 |
| 477.59  | 46.9385 |
| 477.842 | 46.9168 |
| 478.081 | 46.8947 |
| 478.332 | 46.8726 |
| 478.571 | 46.85   |
| 478.816 | 46.8272 |
| 479.056 | 46.8042 |
| 479.3   | 46.7799 |
| 479.543 | 46.756  |
| 479.792 | 46.7322 |
| 480.043 | 46.7085 |
| 480.285 | 46.6847 |
| 480.532 | 46.6611 |
| 480.781 | 46.6377 |

|         |         |
|---------|---------|
| 481.021 | 46.6145 |
| 481.272 | 46.5915 |
| 481.514 | 46.5694 |
| 481.764 | 46.5472 |
| 482.011 | 46.5248 |
| 482.251 | 46.5023 |
| 482.499 | 46.4802 |
| 482.748 | 46.458  |
| 482.997 | 46.4358 |
| 483.24  | 46.4136 |
| 483.485 | 46.3912 |
| 483.731 | 46.3692 |
| 483.982 | 46.3473 |
| 484.227 | 46.3255 |
| 484.473 | 46.3038 |
| 484.726 | 46.282  |
| 484.97  | 46.2603 |
| 485.211 | 46.2387 |
| 485.462 | 46.2171 |
| 485.71  | 46.1955 |
| 485.956 | 46.174  |
| 486.201 | 46.1526 |
| 486.45  | 46.1316 |
| 486.701 | 46.1106 |
| 486.942 | 46.0897 |
| 487.191 | 46.069  |
| 487.443 | 46.0486 |
| 487.686 | 46.028  |
| 487.937 | 46.0076 |
| 488.182 | 45.9872 |
| 488.427 | 45.9669 |
| 488.676 | 45.9464 |
| 488.928 | 45.9259 |
| 489.167 | 45.9053 |
| 489.413 | 45.8844 |
| 489.674 | 45.8635 |
| 489.919 | 45.8425 |
| 490.168 | 45.8214 |
| 490.412 | 45.8001 |
| 490.659 | 45.7789 |
| 490.9   | 45.7579 |
| 491.144 | 45.7371 |
| 491.399 | 45.7168 |
| 491.655 | 45.6967 |

|         |         |
|---------|---------|
| 491.894 | 45.6768 |
| 492.143 | 45.6572 |
| 492.391 | 45.6387 |
| 492.637 | 45.6201 |
| 492.884 | 45.6016 |
| 493.124 | 45.5833 |
| 493.371 | 45.5657 |
| 493.621 | 45.548  |
| 493.871 | 45.5303 |
| 494.124 | 45.5128 |
| 494.367 | 45.4958 |
| 494.619 | 45.4788 |
| 494.873 | 45.4619 |
| 495.113 | 45.4449 |
| 495.356 | 45.4285 |
| 495.602 | 45.4119 |
| 495.852 | 45.3954 |
| 496.096 | 45.379  |
| 496.346 | 45.3627 |
| 496.6   | 45.3464 |
| 496.847 | 45.3302 |
| 497.09  | 45.3142 |
| 497.341 | 45.2986 |
| 497.581 | 45.2829 |
| 497.831 | 45.2673 |
| 498.078 | 45.2518 |
| 498.317 | 45.2365 |
| 498.571 | 45.2211 |
| 498.823 | 45.2057 |
| 499.066 | 45.1904 |
| 499.319 | 45.1753 |
| 499.566 | 45.1602 |
| 499.815 | 45.1449 |
| 500.064 | 45.1296 |
| 500.318 | 45.1143 |
| 500.558 | 45.0986 |
| 500.809 | 45.0827 |
| 501.054 | 45.0667 |
| 501.305 | 45.0503 |
| 501.549 | 45.0343 |
| 501.79  | 45.0185 |
| 502.042 | 45.0027 |
| 502.277 | 44.9874 |
| 502.524 | 44.9722 |

|         |         |
|---------|---------|
| 502.776 | 44.9573 |
| 503.033 | 44.9424 |
| 503.275 | 44.9276 |
| 503.526 | 44.9136 |
| 503.766 | 44.8996 |
| 504.009 | 44.8854 |
| 504.265 | 44.8713 |
| 504.505 | 44.8581 |
| 504.758 | 44.8445 |
| 505.001 | 44.8308 |
| 505.249 | 44.8172 |
| 505.497 | 44.8036 |
| 505.745 | 44.7901 |
| 505.993 | 44.7768 |
| 506.237 | 44.7635 |
| 506.488 | 44.75   |
| 506.729 | 44.7368 |
| 506.978 | 44.7236 |
| 507.226 | 44.7103 |
| 507.475 | 44.6976 |
| 507.725 | 44.6846 |
| 507.967 | 44.6715 |
| 508.215 | 44.6585 |
| 508.461 | 44.6458 |
| 508.71  | 44.633  |
| 508.948 | 44.6202 |
| 509.193 | 44.6073 |
| 509.447 | 44.5947 |
| 509.691 | 44.5819 |
| 509.935 | 44.5689 |
| 510.18  | 44.556  |
| 510.433 | 44.5426 |
| 510.674 | 44.529  |
| 510.917 | 44.5152 |
| 511.164 | 44.5012 |
| 511.414 | 44.4864 |
| 511.654 | 44.472  |
| 511.901 | 44.4576 |
| 512.157 | 44.4434 |
| 512.396 | 44.4293 |
| 512.648 | 44.4156 |
| 512.896 | 44.4022 |
| 513.142 | 44.3888 |
| 513.392 | 44.3764 |

|         |         |
|---------|---------|
| 513.636 | 44.3637 |
| 513.885 | 44.3509 |
| 514.133 | 44.3384 |
| 514.378 | 44.3263 |
| 514.617 | 44.3141 |
| 514.866 | 44.3019 |
| 515.111 | 44.2898 |
| 515.364 | 44.2782 |
| 515.613 | 44.2663 |
| 515.862 | 44.2545 |
| 516.109 | 44.2428 |
| 516.361 | 44.2314 |
| 516.601 | 44.22   |
| 516.847 | 44.2085 |
| 517.096 | 44.197  |
| 517.34  | 44.1855 |
| 517.595 | 44.174  |
| 517.836 | 44.1624 |
| 518.086 | 44.1509 |
| 518.334 | 44.1394 |
| 518.581 | 44.1281 |
| 518.824 | 44.117  |
| 519.07  | 44.106  |
| 519.316 | 44.0956 |
| 519.559 | 44.0847 |
| 519.805 | 44.0736 |
| 520.052 | 44.0626 |
| 520.302 | 44.0517 |
| 520.558 | 44.0406 |
| 520.796 | 44.0297 |
| 521.046 | 44.0189 |
| 521.294 | 44.0081 |
| 521.539 | 43.9976 |
| 521.789 | 43.9869 |
| 522.027 | 43.9761 |
| 522.272 | 43.9653 |
| 522.527 | 43.9542 |
| 522.783 | 43.9432 |
| 523.012 | 43.9321 |
| 523.268 | 43.9209 |
| 523.509 | 43.9092 |
| 523.757 | 43.8975 |
| 524.004 | 43.8857 |
| 524.248 | 43.8739 |



|         |         |
|---------|---------|
| 524.495 | 43.8617 |
| 524.742 | 43.8498 |
| 524.994 | 43.838  |
| 525.24  | 43.8263 |
| 525.489 | 43.8152 |
| 525.735 | 43.8042 |
| 525.982 | 43.7934 |
| 526.228 | 43.7826 |
| 526.479 | 43.7729 |
| 526.721 | 43.7628 |
| 526.97  | 43.7527 |
| 527.214 | 43.7426 |
| 527.459 | 43.7328 |
| 527.702 | 43.7229 |
| 527.949 | 43.713  |
| 528.198 | 43.7031 |
| 528.45  | 43.6932 |
| 528.692 | 43.6835 |
| 528.941 | 43.674  |
| 529.174 | 43.6645 |
| 529.425 | 43.6554 |
| 529.681 | 43.6461 |
| 529.925 | 43.6365 |
| 530.175 | 43.6268 |
| 530.418 | 43.6174 |
| 530.663 | 43.6079 |
| 530.902 | 43.5984 |
| 531.154 | 43.5889 |
| 531.401 | 43.5794 |
| 531.643 | 43.5701 |
| 531.892 | 43.561  |
| 532.141 | 43.552  |
| 532.391 | 43.5432 |
| 532.636 | 43.5345 |
| 532.881 | 43.5258 |
| 533.121 | 43.517  |
| 533.373 | 43.5086 |
| 533.616 | 43.5    |
| 533.862 | 43.4915 |
| 534.106 | 43.483  |
| 534.358 | 43.4747 |
| 534.597 | 43.4662 |
| 534.842 | 43.4576 |
| 535.086 | 43.4492 |

|         |         |
|---------|---------|
| 535.338 | 43.4409 |
| 535.583 | 43.4327 |
| 535.831 | 43.4247 |
| 536.076 | 43.4171 |
| 536.33  | 43.4102 |
| 536.581 | 43.4033 |
| 536.827 | 43.3969 |
| 537.071 | 43.3907 |
| 537.32  | 43.3853 |
| 537.568 | 43.3793 |
| 537.802 | 43.3731 |
| 538.052 | 43.3668 |
| 538.297 | 43.3597 |
| 538.55  | 43.3527 |
| 538.791 | 43.3456 |
| 539.039 | 43.3384 |
| 539.289 | 43.3306 |
| 539.532 | 43.3231 |
| 539.777 | 43.3157 |
| 540.027 | 43.3083 |
| 540.279 | 43.3009 |
| 540.522 | 43.2936 |
| 540.769 | 43.2861 |
| 541.018 | 43.2785 |
| 541.261 | 43.2712 |
| 541.511 | 43.2639 |
| 541.758 | 43.2566 |
| 542.007 | 43.2495 |
| 542.254 | 43.2423 |
| 542.496 | 43.2352 |
| 542.742 | 43.2281 |
| 542.99  | 43.2209 |
| 543.241 | 43.2139 |
| 543.486 | 43.2069 |
| 543.731 | 43.1998 |
| 543.969 | 43.193  |
| 544.218 | 43.1863 |
| 544.468 | 43.1794 |
| 544.719 | 43.1727 |
| 544.958 | 43.1658 |
| 545.211 | 43.1587 |
| 545.462 | 43.1522 |
| 545.706 | 43.1455 |
| 545.946 | 43.1388 |

|         |         |
|---------|---------|
| 546.198 | 43.1324 |
| 546.442 | 43.1261 |
| 546.691 | 43.1199 |
| 546.939 | 43.1141 |
| 547.181 | 43.1086 |
| 547.431 | 43.1035 |
| 547.676 | 43.0989 |
| 547.921 | 43.0945 |
| 548.171 | 43.09   |
| 548.416 | 43.0867 |
| 548.656 | 43.0831 |
| 548.905 | 43.0791 |
| 549.157 | 43.0747 |
| 549.393 | 43.0705 |
| 549.639 | 43.0657 |
| 549.898 | 43.0604 |
| 550.138 | 43.0553 |
| 550.382 | 43.0495 |
| 550.626 | 43.0438 |
| 550.879 | 43.0382 |
| 551.128 | 43.0328 |
| 551.385 | 43.0276 |
| 551.625 | 43.0221 |
| 551.873 | 43.0168 |
| 552.119 | 43.0117 |
| 552.367 | 43.0063 |
| 552.614 | 43.0008 |
| 552.862 | 42.9955 |
| 553.113 | 42.9904 |
| 553.357 | 42.9846 |
| 553.61  | 42.9791 |
| 553.851 | 42.974  |
| 554.094 | 42.969  |
| 554.345 | 42.9639 |
| 554.593 | 42.9591 |
| 554.841 | 42.9548 |
| 555.082 | 42.9507 |
| 555.328 | 42.9469 |
| 555.576 | 42.9432 |
| 555.827 | 42.9399 |
| 556.075 | 42.9365 |
| 556.322 | 42.9329 |
| 556.573 | 42.9293 |
| 556.818 | 42.9259 |

|         |         |
|---------|---------|
| 557.069 | 42.9222 |
| 557.315 | 42.9174 |
| 557.57  | 42.9132 |
| 557.814 | 42.9094 |
| 558.06  | 42.9057 |
| 558.304 | 42.9012 |
| 558.551 | 42.8967 |
| 558.799 | 42.8926 |
| 559.044 | 42.8888 |
| 559.291 | 42.885  |
| 559.543 | 42.8808 |
| 559.789 | 42.8764 |
| 560.037 | 42.8722 |
| 560.281 | 42.8683 |
| 560.529 | 42.8639 |
| 560.781 | 42.8593 |
| 561.027 | 42.855  |
| 561.267 | 42.8511 |
| 561.519 | 42.8482 |
| 561.775 | 42.8456 |
| 562.014 | 42.8431 |
| 562.263 | 42.8404 |
| 562.512 | 42.8395 |
| 562.762 | 42.8381 |
| 563.008 | 42.8368 |
| 563.258 | 42.8358 |
| 563.503 | 42.8349 |
| 563.756 | 42.8332 |
| 564.001 | 42.8311 |
| 564.249 | 42.8289 |
| 564.509 | 42.8264 |
| 564.752 | 42.8244 |
| 565.003 | 42.8225 |
| 565.248 | 42.8209 |
| 565.484 | 42.8186 |
| 565.736 | 42.8157 |
| 565.985 | 42.8128 |
| 566.231 | 42.8099 |
| 566.472 | 42.8065 |
| 566.723 | 42.804  |
| 566.973 | 42.8018 |
| 567.214 | 42.7999 |
| 567.469 | 42.7979 |
| 567.707 | 42.795  |

|         |         |
|---------|---------|
| 567.952 | 42.792  |
| 568.196 | 42.7891 |
| 568.442 | 42.7853 |
| 568.68  | 42.7827 |
| 568.928 | 42.7802 |
| 569.166 | 42.7776 |
| 569.41  | 42.7757 |
| 569.65  | 42.7736 |
| 569.897 | 42.7719 |
| 570.135 | 42.7705 |
| 570.366 | 42.7693 |
| 570.613 | 42.7678 |
| 570.855 | 42.766  |
| 571.1   | 42.7642 |
| 571.337 | 42.7631 |
| 571.582 | 42.7617 |
| 571.826 | 42.7597 |
| 572.064 | 42.7573 |
| 572.298 | 42.7541 |
| 572.542 | 42.7512 |
| 572.778 | 42.7486 |
| 573.024 | 42.7461 |
| 573.274 | 42.7424 |
| 573.505 | 42.7387 |
| 573.746 | 42.7351 |
| 573.994 | 42.7317 |
| 574.239 | 42.7282 |
| 574.479 | 42.7245 |
| 574.721 | 42.7205 |
| 574.964 | 42.7166 |
| 575.209 | 42.7133 |
| 575.445 | 42.7102 |
| 575.687 | 42.7074 |
| 575.939 | 42.7049 |
| 576.184 | 42.7022 |
| 576.431 | 42.6988 |
| 576.675 | 42.6955 |
| 576.913 | 42.6924 |
| 577.156 | 42.6893 |
| 577.399 | 42.6873 |
| 577.646 | 42.6859 |
| 577.887 | 42.6848 |
| 578.141 | 42.6849 |
| 578.385 | 42.6838 |

|         |         |
|---------|---------|
| 578.629 | 42.6827 |
| 578.872 | 42.6817 |
| 579.109 | 42.6801 |
| 579.349 | 42.6792 |
| 579.608 | 42.6783 |
| 579.857 | 42.6772 |
| 580.094 | 42.6755 |
| 580.338 | 42.6733 |
| 580.584 | 42.6711 |
| 580.833 | 42.6689 |
| 581.073 | 42.6656 |
| 581.323 | 42.6633 |
| 581.565 | 42.6609 |
| 581.811 | 42.6581 |
| 582.06  | 42.6557 |
| 582.308 | 42.6529 |
| 582.557 | 42.6503 |
| 582.801 | 42.6479 |
| 583.041 | 42.6457 |
| 583.285 | 42.6427 |
| 583.532 | 42.6393 |
| 583.777 | 42.6359 |
| 584.03  | 42.6326 |
| 584.269 | 42.6291 |
| 584.511 | 42.6262 |
| 584.759 | 42.6233 |
| 585.002 | 42.62   |
| 585.247 | 42.6171 |
| 585.497 | 42.614  |
| 585.741 | 42.611  |
| 585.992 | 42.6082 |
| 586.229 | 42.604  |
| 586.48  | 42.5999 |
| 586.736 | 42.5963 |
| 586.978 | 42.5929 |
| 587.223 | 42.5897 |
| 587.467 | 42.5866 |
| 587.714 | 42.5834 |
| 587.966 | 42.5806 |
| 588.205 | 42.5794 |
| 588.455 | 42.5775 |
| 588.708 | 42.575  |
| 588.944 | 42.5725 |
| 589.193 | 42.5704 |

|         |         |
|---------|---------|
| 589.431 | 42.5682 |
| 589.689 | 42.5653 |
| 589.928 | 42.5619 |
| 590.184 | 42.5581 |
| 590.429 | 42.5546 |
| 590.672 | 42.5504 |
| 590.914 | 42.5457 |
| 591.169 | 42.5408 |
| 591.419 | 42.5363 |
| 591.669 | 42.5314 |
| 591.916 | 42.5262 |
| 592.156 | 42.5212 |
| 592.399 | 42.5164 |
| 592.65  | 42.5112 |
| 592.893 | 42.5058 |
| 593.152 | 42.5008 |
| 593.395 | 42.4956 |
| 593.628 | 42.4902 |
| 593.887 | 42.4847 |
| 594.125 | 42.4795 |
| 594.373 | 42.474  |
| 594.63  | 42.4684 |
| 594.876 | 42.4631 |
| 595.123 | 42.4579 |
| 595.36  | 42.4522 |
| 595.606 | 42.4467 |
| 595.839 | 42.4413 |
| 596.089 | 42.4355 |
| 596.341 | 42.4296 |
| 596.579 | 42.424  |
| 596.834 | 42.4182 |
| 597.083 | 42.4117 |
| 597.329 | 42.4059 |
| 597.578 | 42.4002 |
| 597.825 | 42.3943 |
| 598.068 | 42.3885 |
| 598.309 | 42.3828 |
| 598.549 | 42.3769 |
| 598.8   | 42.3708 |
| 599.053 | 42.3651 |
| 599.288 | 42.3589 |
| 599.541 | 42.3527 |
| 599.782 | 42.3466 |
| 600.024 | 42.3404 |

|         |         |
|---------|---------|
| 600.255 | 42.3335 |
| 600.524 | 42.3273 |
| 600.766 | 42.3211 |
| 601.001 | 42.3147 |
| 601.262 | 42.3087 |
| 601.5   | 42.3028 |
| 601.754 | 42.2967 |
| 601.994 | 42.2906 |
| 602.233 | 42.285  |
| 602.477 | 42.2789 |
| 602.732 | 42.2729 |
| 602.98  | 42.2671 |
| 603.233 | 42.2609 |
| 603.483 | 42.255  |
| 603.714 | 42.2494 |
| 603.963 | 42.2438 |
| 604.218 | 42.238  |
| 604.458 | 42.2324 |
| 604.697 | 42.2268 |
| 604.95  | 42.221  |
| 605.206 | 42.215  |
| 605.43  | 42.2092 |
| 605.692 | 42.2031 |
| 605.919 | 42.197  |
| 606.165 | 42.1916 |
| 606.427 | 42.1864 |
| 606.675 | 42.1815 |
| 606.938 | 42.1771 |
| 607.173 | 42.1741 |
| 607.422 | 42.1704 |
| 607.667 | 42.1664 |
| 607.915 | 42.1627 |
| 608.164 | 42.159  |
| 608.416 | 42.1547 |
| 608.663 | 42.1505 |
| 608.912 | 42.1464 |
| 609.159 | 42.1412 |
| 609.403 | 42.1361 |
| 609.647 | 42.1312 |
| 609.906 | 42.1264 |
| 610.154 | 42.1207 |
| 610.417 | 42.1154 |
| 610.661 | 42.1102 |
| 610.906 | 42.1049 |



|         |         |
|---------|---------|
| 611.16  | 42.0987 |
| 611.403 | 42.0929 |
| 611.648 | 42.0873 |
| 611.895 | 42.0815 |
| 612.148 | 42.0755 |
| 612.397 | 42.0701 |
| 612.649 | 42.0645 |
| 612.892 | 42.0588 |
| 613.138 | 42.0538 |
| 613.391 | 42.0483 |
| 613.636 | 42.0425 |
| 613.889 | 42.0368 |
| 614.13  | 42.0309 |
| 614.382 | 42.025  |
| 614.633 | 42.0191 |
| 614.876 | 42.0136 |
| 615.115 | 42.0076 |
| 615.362 | 42.0017 |
| 615.606 | 41.9959 |
| 615.856 | 41.99   |
| 616.105 | 41.9834 |
| 616.356 | 41.9772 |
| 616.607 | 41.971  |
| 616.858 | 41.9647 |
| 617.104 | 41.9583 |
| 617.356 | 41.952  |
| 617.595 | 41.9455 |
| 617.845 | 41.9389 |
| 618.09  | 41.9325 |
| 618.337 | 41.9257 |
| 618.582 | 41.9191 |
| 618.833 | 41.9124 |
| 619.082 | 41.9053 |
| 619.336 | 41.8985 |
| 619.584 | 41.8916 |
| 619.822 | 41.8844 |
| 620.071 | 41.8769 |
| 620.318 | 41.8689 |
| 620.556 | 41.8605 |
| 620.805 | 41.8522 |
| 621.052 | 41.8431 |
| 621.296 | 41.8345 |
| 621.546 | 41.8262 |
| 621.794 | 41.8178 |

|         |         |
|---------|---------|
| 622.045 | 41.8099 |
| 622.291 | 41.8021 |
| 622.542 | 41.7944 |
| 622.789 | 41.7868 |
| 623.032 | 41.7796 |
| 623.281 | 41.7728 |
| 623.527 | 41.7657 |
| 623.779 | 41.7586 |
| 624.026 | 41.7513 |
| 624.271 | 41.7441 |
| 624.523 | 41.7369 |
| 624.769 | 41.7296 |
| 625.016 | 41.7226 |
| 625.267 | 41.7158 |
| 625.518 | 41.7089 |
| 625.774 | 41.7022 |
| 626.014 | 41.6955 |
| 626.263 | 41.689  |
| 626.52  | 41.6826 |
| 626.771 | 41.676  |
| 627.021 | 41.6692 |
| 627.272 | 41.6622 |
| 627.519 | 41.6549 |
| 627.774 | 41.6477 |
| 628.022 | 41.6403 |
| 628.268 | 41.6323 |
| 628.522 | 41.6248 |
| 628.781 | 41.6173 |
| 629.041 | 41.6096 |
| 629.292 | 41.6023 |
| 629.55  | 41.595  |
| 629.8   | 41.5877 |
| 630.052 | 41.5804 |
| 630.305 | 41.5732 |
| 630.571 | 41.5661 |
| 630.817 | 41.5588 |
| 631.073 | 41.5513 |
| 631.335 | 41.5438 |
| 631.587 | 41.5362 |
| 631.838 | 41.5287 |
| 632.109 | 41.5212 |
| 632.363 | 41.5134 |
| 632.615 | 41.5053 |
| 632.868 | 41.497  |

|         |         |
|---------|---------|
| 633.133 | 41.4888 |
| 633.393 | 41.4801 |
| 633.647 | 41.4719 |
| 633.903 | 41.4636 |
| 634.168 | 41.4553 |
| 634.426 | 41.447  |
| 634.684 | 41.4384 |
| 634.94  | 41.4298 |
| 635.203 | 41.421  |
| 635.452 | 41.4116 |
| 635.702 | 41.4024 |
| 635.951 | 41.3929 |
| 636.2   | 41.3832 |
| 636.456 | 41.373  |
| 636.706 | 41.3629 |
| 636.961 | 41.3528 |
| 637.215 | 41.3425 |
| 637.472 | 41.332  |
| 637.722 | 41.3215 |
| 637.971 | 41.3111 |
| 638.222 | 41.3006 |
| 638.472 | 41.2898 |
| 638.719 | 41.2787 |
| 638.977 | 41.2675 |
| 639.227 | 41.2563 |
| 639.475 | 41.2443 |
| 639.72  | 41.2325 |
| 639.973 | 41.2207 |
| 640.222 | 41.2087 |
| 640.475 | 41.1967 |
| 640.73  | 41.1846 |
| 640.982 | 41.1723 |
| 641.224 | 41.1599 |
| 641.478 | 41.1475 |
| 641.726 | 41.1348 |
| 641.974 | 41.1223 |
| 642.22  | 41.1096 |
| 642.468 | 41.0968 |
| 642.726 | 41.0838 |
| 642.972 | 41.0707 |
| 643.22  | 41.0575 |
| 643.473 | 41.0443 |
| 643.722 | 41.031  |
| 643.965 | 41.0177 |

|         |         |
|---------|---------|
| 644.221 | 41.0045 |
| 644.468 | 40.9913 |
| 644.722 | 40.9777 |
| 644.974 | 40.9638 |
| 645.219 | 40.9498 |
| 645.47  | 40.9358 |
| 645.727 | 40.9213 |
| 645.973 | 40.9071 |
| 646.226 | 40.8929 |
| 646.477 | 40.8787 |
| 646.73  | 40.8641 |
| 646.978 | 40.849  |
| 647.224 | 40.8337 |
| 647.477 | 40.8184 |
| 647.729 | 40.8018 |
| 647.978 | 40.7856 |
| 648.224 | 40.7691 |
| 648.48  | 40.7526 |
| 648.731 | 40.7359 |
| 648.98  | 40.7193 |
| 649.226 | 40.7026 |
| 649.485 | 40.6859 |
| 649.733 | 40.6692 |
| 649.987 | 40.6524 |
| 650.242 | 40.6355 |
| 650.495 | 40.6186 |
| 650.751 | 40.6016 |
| 651.005 | 40.5845 |
| 651.252 | 40.5675 |
| 651.498 | 40.5505 |
| 651.749 | 40.5334 |
| 652.013 | 40.5164 |
| 652.267 | 40.4995 |
| 652.522 | 40.4825 |
| 652.782 | 40.4653 |
| 653.028 | 40.448  |
| 653.279 | 40.4307 |
| 653.541 | 40.4134 |
| 653.794 | 40.3957 |
| 654.052 | 40.378  |
| 654.311 | 40.3601 |
| 654.571 | 40.3421 |
| 654.835 | 40.324  |
| 655.088 | 40.3063 |

|         |         |
|---------|---------|
| 655.349 | 40.2896 |
| 655.628 | 40.2737 |
| 656.178 | 40.2519 |
| 657.009 | 40.2197 |
| 657.777 | 40.1889 |
| 658.474 | 40.18   |
| 659.127 | 40.092  |
| 659.766 | 39.9878 |
| 660.36  | 39.8483 |
| 660.921 | 39.6785 |
| 661.476 | 39.4799 |
| 662.005 | 39.3015 |
| 662.505 | 39.1235 |
| 662.988 | 38.9437 |
| 663.456 | 38.7621 |
| 663.921 | 38.5847 |
| 664.374 | 38.4097 |
| 664.815 | 38.2364 |
| 665.261 | 38.0718 |
| 665.708 | 37.9063 |
| 666.159 | 37.7427 |
| 666.604 | 37.5808 |
| 667.048 | 37.4283 |
| 667.493 | 37.2739 |
| 667.929 | 37.1207 |
| 668.359 | 36.9686 |
| 668.791 | 36.8228 |
| 669.212 | 36.6751 |
| 669.634 | 36.5277 |
| 670.044 | 36.3808 |
| 670.446 | 36.2361 |
| 670.836 | 36.0901 |
| 671.223 | 35.9432 |
| 671.598 | 35.7952 |
| 671.962 | 35.6463 |
| 672.315 | 35.4932 |
| 672.658 | 35.3392 |
| 672.997 | 35.1833 |
| 673.322 | 35.0258 |
| 673.643 | 34.8605 |
| 673.953 | 34.6971 |
| 674.254 | 34.5328 |
| 674.552 | 34.3677 |
| 674.84  | 34.1978 |

|         |         |
|---------|---------|
| 675.117 | 34.0296 |
| 675.397 | 33.8615 |
| 675.665 | 33.6934 |
| 675.934 | 33.5244 |
| 676.192 | 33.3562 |
| 676.441 | 33.1884 |
| 676.682 | 33.0211 |
| 676.915 | 32.8559 |
| 677.148 | 32.6913 |
| 677.37  | 32.528  |
| 677.593 | 32.3655 |
| 677.8   | 32.2076 |
| 678.001 | 32.0497 |
| 678.194 | 31.8935 |
| 678.38  | 31.7387 |
| 678.551 | 31.5908 |
| 678.708 | 31.4425 |
| 678.849 | 31.2955 |
| 678.967 | 31.1497 |
| 679.073 | 31.0097 |
| 679.164 | 30.8662 |
| 679.251 | 30.7207 |
| 679.33  | 30.5739 |
| 679.423 | 30.4222 |
| 679.533 | 30.2686 |
| 679.641 | 30.113  |
| 679.777 | 29.956  |
| 679.934 | 29.7901 |
| 680.129 | 29.6283 |
| 680.356 | 29.4665 |
| 680.547 | 29.3043 |
| 680.748 | 29.1402 |
| 680.938 | 28.975  |
| 681.081 | 28.8073 |
| 681.186 | 28.6372 |
| 681.316 | 28.4564 |
| 681.483 | 28.2734 |
| 681.661 | 28.0877 |
| 681.818 | 27.9007 |
| 681.906 | 27.7064 |
| 681.964 | 27.5256 |
| 681.994 | 27.3497 |
| 681.908 | 27.1688 |
| 681.747 | 27.0316 |

|         |         |
|---------|---------|
| 681.578 | 26.8963 |
| 681.41  | 26.8014 |
| 681.274 | 26.7206 |
| 681.16  | 26.6525 |
| 681.076 | 26.5774 |
| 681.022 | 26.5059 |
| 680.992 | 26.437  |
| 680.974 | 26.3787 |
| 680.981 | 26.3156 |
| 680.991 | 26.2524 |
| 681.025 | 26.1897 |
| 681.076 | 26.1288 |
| 681.14  | 26.0669 |
| 681.213 | 26.0046 |
| 681.3   | 25.942  |
| 681.4   | 25.8792 |
| 681.513 | 25.8159 |
| 681.636 | 25.7528 |
| 681.779 | 25.6895 |
| 681.94  | 25.6258 |
| 682.212 | 25.5607 |
| 682.671 | 25.4952 |
| 682.855 | 25.4293 |
| 682.981 | 25.3633 |
| 683.105 | 25.2953 |
| 683.249 | 25.2284 |
| 683.412 | 25.162  |
| 683.574 | 25.096  |
| 683.746 | 25.0313 |
| 683.923 | 24.9667 |
| 684.106 | 24.9026 |
| 684.299 | 24.8388 |
| 684.495 | 24.7766 |
| 684.686 | 24.7139 |
| 684.891 | 24.6511 |
| 685.096 | 24.5884 |
| 685.303 | 24.5266 |
| 685.524 | 24.4649 |
| 685.739 | 24.4036 |
| 685.965 | 24.3424 |
| 686.177 | 24.2821 |
| 686.404 | 24.2216 |
| 686.626 | 24.161  |
| 686.859 | 24.1004 |

|         |         |
|---------|---------|
| 687.092 | 24.0397 |
| 687.321 | 23.9788 |
| 687.549 | 23.9178 |
| 687.774 | 23.8569 |
| 688.002 | 23.7956 |
| 688.229 | 23.7346 |
| 688.46  | 23.6739 |
| 688.691 | 23.6132 |
| 688.922 | 23.5533 |
| 689.16  | 23.4935 |
| 689.391 | 23.434  |
| 689.622 | 23.3747 |
| 689.874 | 23.3164 |
| 690.115 | 23.258  |
| 690.367 | 23.2    |
| 690.625 | 23.1424 |
| 690.875 | 23.0855 |
| 691.123 | 23.0284 |
| 691.356 | 22.9714 |
| 691.594 | 22.9144 |
| 691.833 | 22.8577 |
| 692.074 | 22.8006 |
| 692.29  | 22.7429 |
| 692.537 | 22.6849 |
| 692.771 | 22.626  |
| 692.992 | 22.5674 |
| 693.213 | 22.5086 |
| 693.447 | 22.4496 |
| 693.678 | 22.3899 |
| 693.91  | 22.3305 |
| 694.143 | 22.2712 |
| 694.383 | 22.2119 |
| 694.61  | 22.1524 |
| 694.85  | 22.0931 |
| 695.091 | 22.0341 |
| 695.316 | 21.9753 |
| 695.558 | 21.9172 |
| 695.809 | 21.8592 |
| 696.048 | 21.8015 |
| 696.285 | 21.7442 |
| 696.522 | 21.6886 |
| 696.762 | 21.633  |
| 696.999 | 21.578  |
| 697.246 | 21.5235 |



|         |         |
|---------|---------|
| 697.476 | 21.4713 |
| 697.723 | 21.4191 |
| 697.969 | 21.3676 |
| 698.208 | 21.3168 |
| 698.456 | 21.2689 |
| 698.7   | 21.2209 |
| 698.956 | 21.1739 |
| 699.209 | 21.1279 |
| 699.461 | 21.0859 |
| 699.716 | 21.044  |
| 699.968 | 21.004  |
| 700.226 | 20.9654 |
| 700.482 | 20.9339 |
| 700.722 | 20.9026 |
| 700.983 | 20.8741 |
| 701.258 | 20.8479 |
| 701.54  | 20.8319 |
| 701.813 | 20.8142 |
| 702.087 | 20.7985 |
| 702.356 | 20.7846 |
| 702.61  | 20.7719 |
| 702.873 | 20.7671 |
| 703.128 | 20.7593 |
| 703.395 | 20.7513 |
| 703.64  | 20.7438 |
| 703.886 | 20.739  |
| 704.134 | 20.7332 |
| 704.369 | 20.7272 |
| 704.616 | 20.7215 |
| 704.864 | 20.7174 |
| 705.109 | 20.7133 |
| 705.353 | 20.7091 |
| 705.604 | 20.7047 |
| 705.848 | 20.7011 |
| 706.099 | 20.6973 |
| 706.344 | 20.6938 |
| 706.585 | 20.6905 |
| 706.827 | 20.6878 |
| 707.069 | 20.6853 |
| 707.314 | 20.6823 |
| 707.56  | 20.6789 |
| 707.809 | 20.6765 |
| 708.056 | 20.6738 |
| 708.299 | 20.6713 |

|         |         |
|---------|---------|
| 708.551 | 20.6689 |
| 708.784 | 20.6667 |
| 709.03  | 20.6648 |
| 709.282 | 20.663  |
| 709.531 | 20.6613 |
| 709.77  | 20.6592 |
| 710.018 | 20.6559 |
| 710.267 | 20.6522 |
| 710.51  | 20.6484 |
| 710.758 | 20.6429 |
| 711.006 | 20.6387 |
| 711.254 | 20.635  |
| 711.498 | 20.6315 |
| 711.74  | 20.6294 |
| 711.987 | 20.627  |
| 712.234 | 20.6249 |
| 712.489 | 20.6231 |
| 712.725 | 20.6223 |
| 712.969 | 20.6213 |
| 713.215 | 20.6204 |
| 713.454 | 20.6196 |
| 713.699 | 20.6195 |
| 713.934 | 20.6191 |
| 714.194 | 20.6186 |
| 714.437 | 20.6177 |
| 714.682 | 20.6156 |
| 714.932 | 20.6134 |
| 715.175 | 20.6112 |
| 715.427 | 20.609  |
| 715.678 | 20.6056 |
| 715.922 | 20.6034 |
| 716.16  | 20.6017 |
| 716.401 | 20.6003 |
| 716.648 | 20.6004 |
| 716.896 | 20.5999 |
| 717.132 | 20.5995 |
| 717.389 | 20.5991 |
| 717.642 | 20.5992 |
| 717.88  | 20.5991 |
| 718.124 | 20.599  |
| 718.373 | 20.599  |
| 718.615 | 20.599  |
| 718.865 | 20.599  |
| 719.108 | 20.599  |

|         |         |
|---------|---------|
| 719.359 | 20.599  |
| 719.602 | 20.599  |
| 719.848 | 20.599  |
| 720.091 | 20.599  |
| 720.344 | 20.599  |
| 720.59  | 20.599  |
| 720.826 | 20.599  |
| 721.075 | 20.599  |
| 721.324 | 20.599  |
| 721.567 | 20.599  |
| 721.815 | 20.5989 |
| 722.062 | 20.5987 |
| 722.309 | 20.5981 |
| 722.554 | 20.5969 |
| 722.799 | 20.5937 |
| 723.036 | 20.5905 |
| 723.288 | 20.587  |
| 723.533 | 20.5835 |
| 723.787 | 20.5781 |
| 724.041 | 20.5742 |
| 724.28  | 20.5709 |
| 724.527 | 20.568  |
| 724.774 | 20.5668 |
| 725.017 | 20.5652 |
| 725.263 | 20.5638 |
| 725.512 | 20.5627 |
| 725.754 | 20.5626 |
| 726.006 | 20.5621 |
| 726.254 | 20.5617 |
| 726.504 | 20.5613 |
| 726.756 | 20.5613 |
| 726.997 | 20.5612 |
| 727.239 | 20.5611 |
| 727.489 | 20.561  |
| 727.73  | 20.5611 |
| 727.98  | 20.561  |
| 728.229 | 20.561  |
| 728.47  | 20.561  |
| 728.726 | 20.561  |
| 728.974 | 20.561  |
| 729.224 | 20.5608 |
| 729.466 | 20.5603 |
| 729.712 | 20.5584 |
| 729.96  | 20.5564 |

|         |         |
|---------|---------|
| 730.214 | 20.5542 |
| 730.456 | 20.5521 |
| 730.693 | 20.5487 |
| 730.939 | 20.5465 |
| 731.188 | 20.5448 |
| 731.437 | 20.5433 |
| 731.688 | 20.5433 |
| 731.927 | 20.5427 |
| 732.178 | 20.5423 |
| 732.429 | 20.5419 |
| 732.675 | 20.542  |
| 732.918 | 20.5419 |
| 733.151 | 20.5418 |
| 733.412 | 20.5417 |
| 733.661 | 20.5417 |
| 733.898 | 20.5417 |
| 734.145 | 20.5417 |
| 734.396 | 20.5417 |
| 734.641 | 20.5417 |
| 734.897 | 20.5415 |
| 735.13  | 20.5407 |
| 735.378 | 20.5392 |
| 735.624 | 20.5364 |
| 735.866 | 20.5337 |
| 736.116 | 20.5308 |
| 736.363 | 20.5277 |
| 736.611 | 20.5232 |
| 736.847 | 20.5197 |
| 737.096 | 20.5166 |
| 737.335 | 20.5137 |
| 737.591 | 20.5119 |
| 737.841 | 20.5099 |
| 738.085 | 20.5081 |
| 738.326 | 20.5065 |
| 738.576 | 20.5059 |
| 738.826 | 20.5051 |
| 739.064 | 20.5043 |
| 739.308 | 20.5037 |
| 739.559 | 20.5031 |
| 739.795 | 20.5015 |
| 740.046 | 20.4993 |
| 740.294 | 20.4968 |
| 740.532 | 20.4935 |
| 740.79  | 20.491  |

|         |         |
|---------|---------|
| 741.033 | 20.4888 |
| 741.283 | 20.4868 |
| 741.529 | 20.4856 |
| 741.775 | 20.4844 |
| 742.02  | 20.4834 |
| 742.268 | 20.4827 |
| 742.513 | 20.4821 |
| 742.753 | 20.4824 |
| 742.997 | 20.4823 |
| 743.252 | 20.4821 |
| 743.486 | 20.4819 |
| 743.733 | 20.4804 |
| 743.99  | 20.4784 |
| 744.241 | 20.4763 |
| 744.481 | 20.4742 |
| 744.721 | 20.4708 |
| 744.961 | 20.4685 |
| 745.202 | 20.4667 |
| 745.459 | 20.4652 |
| 745.704 | 20.4648 |
| 745.958 | 20.4639 |
| 746.217 | 20.4628 |
| 746.441 | 20.4617 |
| 746.694 | 20.4604 |
| 746.94  | 20.459  |
| 747.175 | 20.4574 |
| 747.428 | 20.4557 |
| 747.675 | 20.453  |
| 747.923 | 20.4499 |
| 748.162 | 20.4463 |
| 748.41  | 20.4426 |
| 748.656 | 20.4384 |
| 748.912 | 20.435  |
| 749.162 | 20.4321 |
| 749.412 | 20.4295 |
| 749.649 | 20.4283 |
| 749.9   | 20.4269 |
| 750.139 | 20.4257 |
| 750.386 | 20.4247 |
| 750.638 | 20.4248 |
| 750.879 | 20.4246 |
| 751.122 | 20.4243 |
| 751.37  | 20.424  |
| 751.616 | 20.424  |

|         |         |
|---------|---------|
| 751.858 | 20.4234 |
| 752.107 | 20.422  |
| 752.363 | 20.4201 |
| 752.604 | 20.4174 |
| 752.85  | 20.4151 |
| 753.101 | 20.413  |
| 753.347 | 20.411  |
| 753.591 | 20.4091 |
| 753.842 | 20.4076 |
| 754.087 | 20.4064 |
| 754.328 | 20.4054 |
| 754.579 | 20.4055 |
| 754.825 | 20.4052 |
| 755.074 | 20.405  |
| 755.325 | 20.4047 |
| 755.555 | 20.4048 |
| 755.794 | 20.4048 |
| 756.047 | 20.4047 |
| 756.299 | 20.4047 |
| 756.55  | 20.4047 |
| 756.791 | 20.4046 |
| 757.048 | 20.4041 |
| 757.29  | 20.403  |
| 757.534 | 20.4006 |
| 757.792 | 20.3984 |
| 758.034 | 20.3962 |
| 758.278 | 20.3941 |
| 758.534 | 20.391  |
| 758.786 | 20.389  |
| 759.025 | 20.3874 |
| 759.278 | 20.3862 |
| 759.529 | 20.3851 |
| 759.772 | 20.3856 |
| 760.015 | 20.3854 |
| 760.258 | 20.385  |
| 760.504 | 20.3846 |
| 760.753 | 20.3839 |
| 760.994 | 20.383  |
| 761.243 | 20.3819 |
| 761.497 | 20.3805 |
| 761.748 | 20.3782 |
| 761.994 | 20.3762 |
| 762.245 | 20.3743 |
| 762.494 | 20.3725 |

|         |         |
|---------|---------|
| 762.738 | 20.3706 |
| 762.989 | 20.3691 |
| 763.241 | 20.3678 |
| 763.488 | 20.3666 |
| 763.733 | 20.3663 |
| 763.989 | 20.3658 |
| 764.234 | 20.3653 |
| 764.477 | 20.3648 |
| 764.73  | 20.3648 |
| 764.975 | 20.3647 |
| 765.224 | 20.3646 |
| 765.475 | 20.3644 |
| 765.715 | 20.3645 |
| 765.958 | 20.3644 |
| 766.203 | 20.3644 |
| 766.449 | 20.3644 |
| 766.7   | 20.3644 |
| 766.956 | 20.3644 |
| 767.199 | 20.3643 |
| 767.445 | 20.3643 |
| 767.692 | 20.3643 |
| 767.95  | 20.3643 |
| 768.2   | 20.3643 |
| 768.451 | 20.3643 |
| 768.695 | 20.3643 |
| 768.94  | 20.3643 |
| 769.188 | 20.3643 |
| 769.432 | 20.3643 |
| 769.676 | 20.3643 |
| 769.92  | 20.3643 |
| 770.169 | 20.3643 |
| 770.415 | 20.3643 |
| 770.674 | 20.3643 |
| 770.923 | 20.3643 |
| 771.165 | 20.3643 |
| 771.399 | 20.3643 |
| 771.645 | 20.3643 |
| 771.901 | 20.3643 |
| 772.142 | 20.3643 |
| 772.392 | 20.3643 |
| 772.641 | 20.3643 |
| 772.886 | 20.3643 |
| 773.125 | 20.3643 |
| 773.383 | 20.3643 |

|         |         |
|---------|---------|
| 773.634 | 20.3643 |
| 773.89  | 20.3642 |
| 774.124 | 20.364  |
| 774.361 | 20.3636 |
| 774.615 | 20.3628 |
| 774.858 | 20.3619 |
| 775.108 | 20.3608 |
| 775.36  | 20.3596 |
| 775.594 | 20.3577 |
| 775.845 | 20.3561 |
| 776.09  | 20.3547 |
| 776.343 | 20.3533 |
| 776.584 | 20.352  |
| 776.836 | 20.3509 |
| 777.079 | 20.35   |
| 777.331 | 20.3492 |
| 777.576 | 20.349  |
| 777.823 | 20.3486 |
| 778.065 | 20.3483 |
| 778.316 | 20.348  |
| 778.567 | 20.348  |
| 778.822 | 20.3479 |
| 779.061 | 20.3478 |
| 779.307 | 20.3477 |
| 779.549 | 20.3478 |
| 779.798 | 20.3477 |
| 780.053 | 20.3477 |
| 780.299 | 20.3477 |
| 780.551 | 20.3477 |
| 780.807 | 20.3477 |
| 781.049 | 20.3477 |
| 781.289 | 20.3477 |
| 781.535 | 20.3477 |
| 781.796 | 20.3477 |
| 782.039 | 20.3477 |
| 782.293 | 20.3477 |
| 782.538 | 20.3477 |
| 782.783 | 20.3477 |
| 783.033 | 20.3477 |
| 783.286 | 20.3477 |
| 783.537 | 20.3477 |
| 783.79  | 20.3477 |
| 784.037 | 20.3477 |
| 784.268 | 20.3477 |



|         |         |
|---------|---------|
| 784.511 | 20.3477 |
| 784.767 | 20.3477 |
| 785.013 | 20.3477 |
| 785.264 | 20.3477 |
| 785.518 | 20.3477 |
| 785.76  | 20.3477 |
| 785.997 | 20.3476 |
| 786.237 | 20.3472 |
| 786.493 | 20.3462 |
| 786.743 | 20.3439 |
| 786.99  | 20.3418 |
| 787.243 | 20.3397 |
| 787.487 | 20.3376 |
| 787.738 | 20.3345 |
| 787.995 | 20.3325 |
| 788.24  | 20.331  |
| 788.484 | 20.3297 |
| 788.729 | 20.3299 |
| 788.976 | 20.3295 |
| 789.216 | 20.3291 |
| 789.467 | 20.3288 |
| 789.716 | 20.3289 |
| 789.956 | 20.3288 |
| 790.208 | 20.3288 |
| 790.451 | 20.3287 |
| 790.698 | 20.3287 |
| 790.948 | 20.3287 |
| 791.202 | 20.3287 |
| 791.454 | 20.3287 |
| 791.698 | 20.3287 |
| 791.955 | 20.3287 |
| 792.191 | 20.3287 |
| 792.445 | 20.3287 |
| 792.689 | 20.3287 |
| 792.944 | 20.3287 |
| 793.201 | 20.3287 |
| 793.441 | 20.3286 |
| 793.685 | 20.3283 |
| 793.925 | 20.3278 |
| 794.175 | 20.327  |
| 794.42  | 20.326  |
| 794.668 | 20.3246 |
| 794.92  | 20.3231 |
| 795.17  | 20.3212 |

|         |         |
|---------|---------|
| 795.418 | 20.3192 |
| 795.669 | 20.3171 |
| 795.91  | 20.3151 |
| 796.149 | 20.3133 |
| 796.401 | 20.3118 |
| 796.644 | 20.3105 |
| 796.896 | 20.3095 |
| 797.146 | 20.3088 |
| 797.382 | 20.3083 |

| tg20K/min | ##Temp./°<br>C | Mass/%  |
|-----------|----------------|---------|
|           | 43.151         | 99.9618 |
|           | 43.152         | 99.9459 |
|           | 43.217         | 99.9348 |
|           | 43.389         | 99.9256 |
|           | 43.697         | 99.9164 |
|           | 44.027         | 99.9089 |
|           | 44.367         | 99.9009 |
|           | 44.722         | 99.8912 |
|           | 45.06          | 99.8804 |
|           | 45.392         | 99.8697 |
|           | 45.726         | 99.8559 |
|           | 46.071         | 99.8403 |
|           | 46.431         | 99.8239 |
|           | 46.803         | 99.801  |
|           | 47.173         | 99.7811 |
|           | 47.56          | 99.7612 |
|           | 47.952         | 99.7408 |
|           | 48.334         | 99.7199 |
|           | 48.728         | 99.6991 |
|           | 49.113         | 99.678  |
|           | 49.505         | 99.6567 |
|           | 49.909         | 99.6341 |
|           | 50.297         | 99.6114 |
|           | 50.703         | 99.5882 |
|           | 51.093         | 99.5648 |
|           | 51.478         | 99.5392 |
|           | 51.883         | 99.5136 |
|           | 52.296         | 99.4876 |
|           | 52.692         | 99.4612 |
|           | 53.084         | 99.4323 |
|           | 53.484         | 99.4039 |
|           | 53.873         | 99.3751 |

|        |         |
|--------|---------|
| 54.279 | 99.3458 |
| 54.673 | 99.3145 |
| 55.078 | 99.2833 |
| 55.469 | 99.2516 |
| 55.862 | 99.2195 |
| 56.269 | 99.1847 |
| 56.656 | 99.1501 |
| 57.048 | 99.115  |
| 57.446 | 99.0792 |
| 57.837 | 99.0405 |
| 58.23  | 99.0022 |
| 58.635 | 98.9634 |
| 59.029 | 98.924  |
| 59.403 | 98.882  |
| 59.799 | 98.8402 |
| 60.195 | 98.798  |
| 60.575 | 98.7553 |
| 60.961 | 98.71   |
| 61.348 | 98.6647 |
| 61.728 | 98.6186 |
| 62.105 | 98.5721 |
| 62.498 | 98.5228 |
| 62.899 | 98.474  |
| 63.266 | 98.4246 |
| 63.64  | 98.3747 |
| 64.023 | 98.3224 |
| 64.418 | 98.2705 |
| 64.799 | 98.2179 |
| 65.171 | 98.1648 |
| 65.549 | 98.1092 |
| 65.915 | 98.054  |
| 66.293 | 97.9985 |
| 66.671 | 97.9424 |
| 67.034 | 97.8837 |
| 67.415 | 97.8253 |
| 67.796 | 97.7665 |
| 68.157 | 97.7072 |
| 68.529 | 97.6455 |
| 68.896 | 97.5843 |
| 69.26  | 97.5227 |
| 69.624 | 97.4609 |
| 69.991 | 97.3972 |
| 70.361 | 97.3336 |
| 70.728 | 97.2695 |

|        |         |
|--------|---------|
| 71.089 | 97.2048 |
| 71.464 | 97.1396 |
| 71.824 | 97.0724 |
| 72.168 | 97.0057 |
| 72.548 | 96.9388 |
| 72.902 | 96.8716 |
| 73.274 | 96.8034 |
| 73.625 | 96.7354 |
| 73.984 | 96.6671 |
| 74.341 | 96.5988 |
| 74.693 | 96.5295 |
| 75.049 | 96.46   |
| 75.409 | 96.39   |
| 75.768 | 96.3198 |
| 76.122 | 96.248  |
| 76.463 | 96.1765 |
| 76.817 | 96.1046 |
| 77.181 | 96.0324 |
| 77.534 | 95.9593 |
| 77.885 | 95.8866 |
| 78.244 | 95.8138 |
| 78.584 | 95.7409 |
| 78.943 | 95.6676 |
| 79.296 | 95.5942 |
| 79.647 | 95.5206 |
| 79.997 | 95.4468 |
| 80.345 | 95.3722 |
| 80.697 | 95.2976 |
| 81.038 | 95.2229 |
| 81.397 | 95.1481 |
| 81.743 | 95.0721 |
| 82.088 | 94.9964 |
| 82.441 | 94.9208 |
| 82.788 | 94.8452 |
| 83.139 | 94.7692 |
| 83.481 | 94.6937 |
| 83.837 | 94.6182 |
| 84.18  | 94.5428 |
| 84.533 | 94.4675 |
| 84.866 | 94.3918 |
| 85.22  | 94.3159 |
| 85.571 | 94.2399 |
| 85.913 | 94.1633 |
| 86.267 | 94.087  |

|         |         |
|---------|---------|
| 86.608  | 94.0109 |
| 86.941  | 93.9346 |
| 87.298  | 93.8585 |
| 87.652  | 93.7826 |
| 87.994  | 93.7069 |
| 88.347  | 93.6311 |
| 88.697  | 93.5561 |
| 89.032  | 93.4808 |
| 89.375  | 93.4053 |
| 89.72   | 93.3298 |
| 90.072  | 93.2543 |
| 90.42   | 93.1788 |
| 90.759  | 93.1034 |
| 91.115  | 93.0281 |
| 91.461  | 92.9532 |
| 91.807  | 92.8785 |
| 92.154  | 92.8041 |
| 92.499  | 92.7299 |
| 92.851  | 92.6564 |
| 93.196  | 92.5826 |
| 93.551  | 92.5089 |
| 93.892  | 92.4352 |
| 94.246  | 92.3618 |
| 94.588  | 92.2887 |
| 94.936  | 92.2158 |
| 95.282  | 92.1432 |
| 95.63   | 92.0718 |
| 95.98   | 92.0003 |
| 96.322  | 91.9291 |
| 96.67   | 91.8581 |
| 97.025  | 91.7884 |
| 97.367  | 91.7182 |
| 97.709  | 91.648  |
| 98.068  | 91.5779 |
| 98.425  | 91.5083 |
| 98.765  | 91.4386 |
| 99.123  | 91.3691 |
| 99.464  | 91.2999 |
| 99.819  | 91.2318 |
| 100.162 | 91.1637 |
| 100.508 | 91.0958 |
| 100.862 | 91.0281 |
| 101.213 | 90.962  |
| 101.556 | 90.8953 |

|         |         |
|---------|---------|
| 101.914 | 90.8287 |
| 102.258 | 90.7623 |
| 102.608 | 90.6966 |
| 102.961 | 90.6309 |
| 103.301 | 90.5654 |
| 103.658 | 90.5004 |
| 104.014 | 90.4359 |
| 104.354 | 90.373  |
| 104.701 | 90.3099 |
| 105.06  | 90.247  |
| 105.417 | 90.1842 |
| 105.764 | 90.1236 |
| 106.119 | 90.0626 |
| 106.467 | 90.0016 |
| 106.811 | 89.9407 |
| 107.162 | 89.8808 |
| 107.512 | 89.8208 |
| 107.862 | 89.7611 |
| 108.218 | 89.7015 |
| 108.566 | 89.6433 |
| 108.913 | 89.5852 |
| 109.278 | 89.5276 |
| 109.625 | 89.4703 |
| 109.979 | 89.4149 |
| 110.335 | 89.359  |
| 110.675 | 89.303  |
| 111.028 | 89.2472 |
| 111.385 | 89.1922 |
| 111.733 | 89.137  |
| 112.085 | 89.0821 |
| 112.433 | 89.0275 |
| 112.789 | 88.9739 |
| 113.15  | 88.9206 |
| 113.489 | 88.868  |
| 113.844 | 88.8158 |
| 114.203 | 88.7657 |
| 114.56  | 88.715  |
| 114.914 | 88.6644 |
| 115.259 | 88.6141 |
| 115.608 | 88.5649 |
| 115.964 | 88.5158 |
| 116.321 | 88.4671 |
| 116.678 | 88.4189 |
| 117.039 | 88.3724 |

|         |         |
|---------|---------|
| 117.387 | 88.3257 |
| 117.735 | 88.2795 |
| 118.08  | 88.2339 |
| 118.441 | 88.1901 |
| 118.795 | 88.1457 |
| 119.161 | 88.1015 |
| 119.53  | 88.0576 |
| 119.867 | 88.0147 |
| 120.218 | 87.9716 |
| 120.564 | 87.9286 |
| 120.916 | 87.8859 |
| 121.275 | 87.8445 |
| 121.623 | 87.803  |
| 121.993 | 87.7617 |
| 122.341 | 87.7208 |
| 122.694 | 87.6819 |
| 123.058 | 87.6427 |
| 123.404 | 87.6038 |
| 123.762 | 87.5651 |
| 124.122 | 87.5281 |
| 124.463 | 87.4907 |
| 124.829 | 87.4534 |
| 125.174 | 87.4161 |
| 125.532 | 87.3795 |
| 125.881 | 87.3429 |
| 126.233 | 87.3064 |
| 126.61  | 87.2701 |
| 126.954 | 87.2349 |
| 127.306 | 87.2001 |
| 127.66  | 87.1658 |
| 128.008 | 87.1322 |
| 128.371 | 87.099  |
| 128.716 | 87.0678 |
| 129.07  | 87.0356 |
| 129.426 | 87.0033 |
| 129.79  | 86.9709 |
| 130.13  | 86.9391 |
| 130.487 | 86.9073 |
| 130.841 | 86.8757 |
| 131.193 | 86.8443 |
| 131.544 | 86.8139 |
| 131.902 | 86.7836 |
| 132.259 | 86.7538 |
| 132.617 | 86.7242 |

|         |         |
|---------|---------|
| 132.969 | 86.6961 |
| 133.317 | 86.6676 |
| 133.671 | 86.6391 |
| 134.026 | 86.6109 |
| 134.377 | 86.5834 |
| 134.739 | 86.5556 |
| 135.082 | 86.5279 |
| 135.442 | 86.5003 |
| 135.785 | 86.4732 |
| 136.138 | 86.4464 |
| 136.492 | 86.4198 |
| 136.84  | 86.3936 |
| 137.189 | 86.3689 |
| 137.545 | 86.3443 |
| 137.901 | 86.3202 |
| 138.248 | 86.2963 |
| 138.605 | 86.2738 |
| 138.96  | 86.2504 |
| 139.306 | 86.2269 |
| 139.653 | 86.2035 |
| 140.022 | 86.1798 |
| 140.363 | 86.156  |
| 140.716 | 86.1322 |
| 141.066 | 86.1085 |
| 141.415 | 86.0849 |
| 141.772 | 86.0618 |
| 142.119 | 86.0391 |
| 142.471 | 86.0167 |
| 142.814 | 85.9956 |
| 143.176 | 85.9744 |
| 143.521 | 85.9533 |
| 143.869 | 85.9322 |
| 144.217 | 85.9121 |
| 144.57  | 85.8916 |
| 144.916 | 85.871  |
| 145.276 | 85.8504 |
| 145.618 | 85.8294 |
| 145.975 | 85.8085 |
| 146.324 | 85.7877 |
| 146.67  | 85.767  |
| 147.025 | 85.7467 |
| 147.383 | 85.7267 |
| 147.731 | 85.7069 |
| 148.073 | 85.6874 |



|         |         |
|---------|---------|
| 148.426 | 85.669  |
| 148.774 | 85.6504 |
| 149.121 | 85.6318 |
| 149.466 | 85.6132 |
| 149.814 | 85.5947 |
| 150.172 | 85.576  |
| 150.511 | 85.5573 |
| 150.862 | 85.5388 |
| 151.215 | 85.5201 |
| 151.561 | 85.5017 |
| 151.91  | 85.4834 |
| 152.272 | 85.4652 |
| 152.61  | 85.4483 |
| 152.959 | 85.4314 |
| 153.312 | 85.4147 |
| 153.653 | 85.3981 |
| 154.006 | 85.3821 |
| 154.352 | 85.3657 |
| 154.707 | 85.3493 |
| 155.04  | 85.3331 |
| 155.392 | 85.3167 |
| 155.759 | 85.3002 |
| 156.092 | 85.2835 |
| 156.441 | 85.2668 |
| 156.79  | 85.2504 |
| 157.132 | 85.2339 |
| 157.484 | 85.2174 |
| 157.837 | 85.201  |
| 158.186 | 85.1852 |
| 158.532 | 85.1695 |
| 158.877 | 85.1538 |
| 159.222 | 85.1382 |
| 159.568 | 85.1236 |
| 159.914 | 85.1087 |
| 160.262 | 85.0937 |
| 160.61  | 85.0786 |
| 160.953 | 85.0634 |
| 161.3   | 85.0483 |
| 161.643 | 85.033  |
| 161.993 | 85.0176 |
| 162.339 | 85.0024 |
| 162.689 | 84.987  |
| 163.04  | 84.9718 |
| 163.381 | 84.9568 |

|         |         |
|---------|---------|
| 163.724 | 84.9419 |
| 164.066 | 84.9273 |
| 164.413 | 84.9128 |
| 164.764 | 84.8987 |
| 165.107 | 84.8848 |
| 165.449 | 84.871  |
| 165.793 | 84.8568 |
| 166.15  | 84.8426 |
| 166.491 | 84.8283 |
| 166.835 | 84.8133 |
| 167.187 | 84.7985 |
| 167.539 | 84.7838 |
| 167.884 | 84.769  |
| 168.224 | 84.7543 |
| 168.58  | 84.7399 |
| 168.919 | 84.7257 |
| 169.255 | 84.7117 |
| 169.604 | 84.6988 |
| 169.951 | 84.6858 |
| 170.291 | 84.673  |
| 170.644 | 84.6602 |
| 170.983 | 84.6482 |
| 171.327 | 84.6359 |
| 171.685 | 84.6234 |
| 172.028 | 84.6108 |
| 172.366 | 84.5983 |
| 172.711 | 84.5856 |
| 173.059 | 84.5727 |
| 173.405 | 84.5598 |
| 173.747 | 84.5462 |
| 174.095 | 84.5325 |
| 174.437 | 84.5188 |
| 174.779 | 84.5051 |
| 175.119 | 84.4911 |
| 175.466 | 84.4777 |
| 175.811 | 84.4647 |
| 176.157 | 84.4518 |
| 176.491 | 84.44   |
| 176.836 | 84.4279 |
| 177.192 | 84.4158 |
| 177.539 | 84.4038 |
| 177.88  | 84.3924 |
| 178.221 | 84.3807 |
| 178.572 | 84.3689 |

|         |         |
|---------|---------|
| 178.922 | 84.3574 |
| 179.263 | 84.3457 |
| 179.604 | 84.3338 |
| 179.948 | 84.3217 |
| 180.29  | 84.3095 |
| 180.63  | 84.2967 |
| 180.978 | 84.284  |
| 181.323 | 84.2712 |
| 181.665 | 84.2583 |
| 182.003 | 84.245  |
| 182.344 | 84.2322 |
| 182.699 | 84.2195 |
| 183.042 | 84.207  |
| 183.394 | 84.195  |
| 183.731 | 84.1831 |
| 184.08  | 84.1714 |
| 184.431 | 84.1598 |
| 184.775 | 84.1483 |
| 185.111 | 84.1373 |
| 185.467 | 84.1261 |
| 185.793 | 84.1149 |
| 186.137 | 84.1037 |
| 186.484 | 84.0926 |
| 186.828 | 84.0815 |
| 187.174 | 84.0703 |
| 187.521 | 84.0591 |
| 187.861 | 84.0477 |
| 188.202 | 84.036  |
| 188.542 | 84.024  |
| 188.889 | 84.0118 |
| 189.222 | 83.9986 |
| 189.58  | 83.9856 |
| 189.922 | 83.9727 |
| 190.269 | 83.9598 |
| 190.607 | 83.947  |
| 190.949 | 83.9346 |
| 191.296 | 83.9222 |
| 191.639 | 83.9099 |
| 191.983 | 83.8983 |
| 192.326 | 83.8864 |
| 192.666 | 83.8745 |
| 193.014 | 83.8626 |
| 193.352 | 83.8508 |
| 193.691 | 83.8391 |

|         |         |
|---------|---------|
| 194.046 | 83.8275 |
| 194.396 | 83.8159 |
| 194.736 | 83.8046 |
| 195.08  | 83.7931 |
| 195.414 | 83.7817 |
| 195.766 | 83.7701 |
| 196.109 | 83.7585 |
| 196.449 | 83.747  |
| 196.794 | 83.7355 |
| 197.145 | 83.724  |
| 197.48  | 83.7124 |
| 197.828 | 83.7008 |
| 198.175 | 83.6891 |
| 198.526 | 83.6774 |
| 198.859 | 83.6653 |
| 199.205 | 83.6534 |
| 199.554 | 83.6414 |
| 199.898 | 83.6293 |
| 200.237 | 83.6173 |
| 200.572 | 83.6053 |
| 200.914 | 83.5933 |
| 201.27  | 83.5814 |
| 201.607 | 83.5696 |
| 201.954 | 83.5575 |
| 202.296 | 83.5453 |
| 202.635 | 83.5332 |
| 202.974 | 83.5208 |
| 203.323 | 83.5086 |
| 203.671 | 83.4964 |
| 204.016 | 83.4843 |
| 204.354 | 83.4724 |
| 204.708 | 83.4602 |
| 205.04  | 83.448  |
| 205.39  | 83.4358 |
| 205.736 | 83.4233 |
| 206.075 | 83.4108 |
| 206.417 | 83.3983 |
| 206.757 | 83.3858 |
| 207.102 | 83.3731 |
| 207.452 | 83.3605 |
| 207.796 | 83.3477 |
| 208.136 | 83.3348 |
| 208.477 | 83.3221 |
| 208.822 | 83.3094 |

|         |         |
|---------|---------|
| 209.166 | 83.2964 |
| 209.502 | 83.2834 |
| 209.843 | 83.2701 |
| 210.189 | 83.2567 |
| 210.537 | 83.2433 |
| 210.885 | 83.2301 |
| 211.227 | 83.2163 |
| 211.57  | 83.2029 |
| 211.909 | 83.1897 |
| 212.26  | 83.1766 |
| 212.6   | 83.1638 |
| 212.942 | 83.1509 |
| 213.285 | 83.1381 |
| 213.632 | 83.1252 |
| 213.974 | 83.1121 |
| 214.322 | 83.099  |
| 214.656 | 83.0859 |
| 214.996 | 83.0727 |
| 215.345 | 83.0585 |
| 215.695 | 83.0444 |
| 216.037 | 83.0305 |
| 216.366 | 83.0166 |
| 216.725 | 83.0025 |
| 217.063 | 82.9879 |
| 217.403 | 82.9736 |
| 217.748 | 82.9593 |
| 218.092 | 82.9449 |
| 218.442 | 82.9301 |
| 218.78  | 82.9153 |
| 219.136 | 82.9006 |
| 219.469 | 82.8858 |
| 219.814 | 82.8705 |
| 220.166 | 82.8553 |
| 220.499 | 82.84   |
| 220.844 | 82.8245 |
| 221.179 | 82.8087 |
| 221.527 | 82.793  |
| 221.871 | 82.7772 |
| 222.214 | 82.7612 |
| 222.567 | 82.7448 |
| 222.913 | 82.7287 |
| 223.245 | 82.7123 |
| 223.597 | 82.6955 |
| 223.945 | 82.6784 |

|         |         |
|---------|---------|
| 224.274 | 82.6614 |
| 224.629 | 82.6442 |
| 224.964 | 82.6269 |
| 225.316 | 82.6089 |
| 225.658 | 82.5911 |
| 226.002 | 82.5731 |
| 226.346 | 82.5551 |
| 226.697 | 82.5364 |
| 227.041 | 82.5176 |
| 227.381 | 82.4986 |
| 227.725 | 82.4795 |
| 228.072 | 82.4597 |
| 228.416 | 82.4401 |
| 228.766 | 82.4203 |
| 229.108 | 82.4002 |
| 229.448 | 82.3792 |
| 229.797 | 82.358  |
| 230.138 | 82.3365 |
| 230.477 | 82.3148 |
| 230.835 | 82.2916 |
| 231.178 | 82.2688 |
| 231.521 | 82.2459 |
| 231.868 | 82.2228 |
| 232.215 | 82.199  |
| 232.562 | 82.1752 |
| 232.902 | 82.1511 |
| 233.252 | 82.1267 |
| 233.589 | 82.1012 |
| 233.934 | 82.0755 |
| 234.279 | 82.0494 |
| 234.626 | 82.023  |
| 234.965 | 81.9948 |
| 235.309 | 81.9669 |
| 235.656 | 81.9387 |
| 236.001 | 81.9101 |
| 236.346 | 81.8797 |
| 236.694 | 81.8496 |
| 237.033 | 81.8191 |
| 237.38  | 81.7881 |
| 237.728 | 81.7556 |
| 238.071 | 81.7235 |
| 238.416 | 81.6909 |
| 238.758 | 81.6581 |
| 239.108 | 81.624  |

|         |         |
|---------|---------|
| 239.45  | 81.59   |
| 239.794 | 81.5555 |
| 240.133 | 81.5202 |
| 240.475 | 81.4845 |
| 240.816 | 81.4464 |
| 241.163 | 81.4085 |
| 241.51  | 81.3698 |
| 241.857 | 81.3305 |
| 242.195 | 81.2878 |
| 242.533 | 81.2455 |
| 242.884 | 81.2024 |
| 243.228 | 81.1588 |
| 243.565 | 81.1121 |
| 243.903 | 81.0659 |
| 244.252 | 81.0192 |
| 244.587 | 80.9718 |
| 244.934 | 80.9216 |
| 245.277 | 80.8717 |
| 245.621 | 80.8211 |
| 245.963 | 80.77   |
| 246.308 | 80.7153 |
| 246.655 | 80.6609 |
| 246.993 | 80.6055 |
| 247.33  | 80.5493 |
| 247.685 | 80.4893 |
| 248.025 | 80.4297 |
| 248.361 | 80.3691 |
| 248.701 | 80.3075 |
| 249.04  | 80.2409 |
| 249.385 | 80.1742 |
| 249.727 | 80.1056 |
| 250.064 | 80.0355 |
| 250.414 | 79.9581 |
| 250.761 | 79.881  |
| 251.093 | 79.8015 |
| 251.429 | 79.7203 |
| 251.767 | 79.6299 |
| 252.11  | 79.5405 |
| 252.439 | 79.4493 |
| 252.793 | 79.3565 |
| 253.134 | 79.2541 |
| 253.473 | 79.1532 |
| 253.817 | 79.0506 |
| 254.158 | 78.9462 |

|         |         |
|---------|---------|
| 254.499 | 78.8335 |
| 254.845 | 78.7222 |
| 255.182 | 78.6091 |
| 255.519 | 78.4945 |
| 255.865 | 78.372  |
| 256.206 | 78.2508 |
| 256.551 | 78.1283 |
| 256.881 | 78.0047 |
| 257.235 | 77.8741 |
| 257.577 | 77.7447 |
| 257.91  | 77.6144 |
| 258.253 | 77.4829 |
| 258.602 | 77.346  |
| 258.936 | 77.21   |
| 259.27  | 77.0732 |
| 259.628 | 76.9357 |
| 259.986 | 76.7941 |
| 260.325 | 76.6535 |
| 260.668 | 76.5122 |
| 261.008 | 76.3704 |
| 261.355 | 76.2257 |
| 261.708 | 76.0813 |
| 262.035 | 75.9363 |
| 262.391 | 75.7908 |
| 262.726 | 75.6423 |
| 263.07  | 75.4945 |
| 263.438 | 75.3463 |
| 263.769 | 75.1977 |
| 264.111 | 75.0475 |
| 264.457 | 74.8978 |
| 264.783 | 74.748  |
| 265.121 | 74.5984 |
| 265.484 | 74.4485 |
| 265.822 | 74.2989 |
| 266.172 | 74.1495 |
| 266.502 | 74.0002 |
| 266.851 | 73.8517 |
| 267.194 | 73.7031 |
| 267.549 | 73.5544 |
| 267.888 | 73.4057 |
| 268.216 | 73.258  |
| 268.575 | 73.1103 |
| 268.914 | 72.9628 |
| 269.261 | 72.8154 |



|         |         |
|---------|---------|
| 269.631 | 72.6689 |
| 269.949 | 72.5221 |
| 270.292 | 72.3755 |
| 270.639 | 72.2291 |
| 270.975 | 72.0832 |
| 271.319 | 71.9375 |
| 271.664 | 71.7924 |
| 272.008 | 71.648  |
| 272.35  | 71.5043 |
| 272.693 | 71.363  |
| 273.037 | 71.2218 |
| 273.374 | 71.0813 |
| 273.709 | 70.9414 |
| 274.049 | 70.8047 |
| 274.401 | 70.667  |
| 274.76  | 70.5297 |
| 275.079 | 70.3927 |
| 275.397 | 70.2576 |
| 275.761 | 70.1225 |
| 276.107 | 69.988  |
| 276.451 | 69.854  |
| 276.78  | 69.7223 |
| 277.12  | 69.5904 |
| 277.453 | 69.4591 |
| 277.8   | 69.3283 |
| 278.133 | 69.2002 |
| 278.477 | 69.0716 |
| 278.824 | 68.9434 |
| 279.143 | 68.8156 |
| 279.496 | 68.69   |
| 279.844 | 68.5639 |
| 280.181 | 68.4382 |
| 280.519 | 68.3127 |
| 280.862 | 68.1893 |
| 281.187 | 68.0658 |
| 281.536 | 67.9429 |
| 281.873 | 67.8205 |
| 282.214 | 67.7007 |
| 282.572 | 67.5807 |
| 282.903 | 67.4615 |
| 283.231 | 67.3428 |
| 283.56  | 67.2271 |
| 283.903 | 67.1108 |
| 284.234 | 66.9951 |

|         |         |
|---------|---------|
| 284.579 | 66.88   |
| 284.918 | 66.7677 |
| 285.252 | 66.655  |
| 285.591 | 66.5427 |
| 285.93  | 66.431  |
| 286.272 | 66.3223 |
| 286.607 | 66.2131 |
| 286.94  | 66.1044 |
| 287.277 | 65.9962 |
| 287.61  | 65.8911 |
| 287.959 | 65.7853 |
| 288.288 | 65.6799 |
| 288.629 | 65.5749 |
| 288.95  | 65.4724 |
| 289.287 | 65.3695 |
| 289.629 | 65.2672 |
| 289.967 | 65.1654 |
| 290.305 | 65.0656 |
| 290.639 | 64.9656 |
| 290.973 | 64.8661 |
| 291.314 | 64.7669 |
| 291.648 | 64.6702 |
| 291.996 | 64.5731 |
| 292.323 | 64.4762 |
| 292.657 | 64.3799 |
| 293.011 | 64.286  |
| 293.324 | 64.1917 |
| 293.67  | 64.0979 |
| 294.007 | 64.0047 |
| 294.332 | 63.914  |
| 294.675 | 63.8229 |
| 295.008 | 63.7322 |
| 295.346 | 63.642  |
| 295.682 | 63.5523 |
| 296.021 | 63.465  |
| 296.356 | 63.3774 |
| 296.695 | 63.2902 |
| 297.028 | 63.2033 |
| 297.363 | 63.1187 |
| 297.7   | 63.0339 |
| 298.039 | 62.9496 |
| 298.38  | 62.8656 |
| 298.709 | 62.7837 |
| 299.039 | 62.7016 |

|         |         |
|---------|---------|
| 299.37  | 62.6199 |
| 299.703 | 62.5386 |
| 300.046 | 62.4593 |
| 300.38  | 62.3797 |
| 300.732 | 62.3006 |
| 301.064 | 62.2218 |
| 301.401 | 62.145  |
| 301.745 | 62.0678 |
| 302.078 | 61.991  |
| 302.401 | 61.9147 |
| 302.737 | 61.8405 |
| 303.08  | 61.7662 |
| 303.415 | 61.6923 |
| 303.743 | 61.6189 |
| 304.085 | 61.5475 |
| 304.422 | 61.4757 |
| 304.742 | 61.4042 |
| 305.082 | 61.3329 |
| 305.422 | 61.263  |
| 305.772 | 61.1929 |
| 306.101 | 61.1231 |
| 306.421 | 61.0535 |
| 306.761 | 60.985  |
| 307.097 | 60.9165 |
| 307.433 | 60.8483 |
| 307.764 | 60.7803 |
| 308.091 | 60.7137 |
| 308.425 | 60.6472 |
| 308.766 | 60.5812 |
| 309.115 | 60.5157 |
| 309.431 | 60.4525 |
| 309.77  | 60.3891 |
| 310.098 | 60.3259 |
| 310.443 | 60.2631 |
| 310.776 | 60.2027 |
| 311.128 | 60.1418 |
| 311.443 | 60.0811 |
| 311.777 | 60.0209 |
| 312.107 | 59.9624 |
| 312.445 | 59.9037 |
| 312.776 | 59.8452 |
| 313.115 | 59.7871 |
| 313.447 | 59.7304 |
| 313.796 | 59.6733 |

|         |         |
|---------|---------|
| 314.131 | 59.6166 |
| 314.463 | 59.5603 |
| 314.794 | 59.5053 |
| 315.131 | 59.4505 |
| 315.468 | 59.3959 |
| 315.802 | 59.3417 |
| 316.141 | 59.2891 |
| 316.477 | 59.236  |
| 316.814 | 59.1832 |
| 317.152 | 59.1304 |
| 317.474 | 59.0787 |
| 317.81  | 59.0268 |
| 318.149 | 58.9751 |
| 318.475 | 58.9237 |
| 318.817 | 58.8735 |
| 319.138 | 58.8232 |
| 319.48  | 58.7732 |
| 319.812 | 58.7234 |
| 320.167 | 58.675  |
| 320.496 | 58.626  |
| 320.823 | 58.5769 |
| 321.156 | 58.5278 |
| 321.487 | 58.4791 |
| 321.825 | 58.43   |
| 322.161 | 58.3812 |
| 322.488 | 58.3326 |
| 322.83  | 58.2844 |
| 323.167 | 58.2367 |
| 323.493 | 58.1894 |
| 323.83  | 58.1425 |
| 324.166 | 58.0974 |
| 324.507 | 58.0519 |
| 324.837 | 58.0069 |
| 325.178 | 57.9622 |
| 325.519 | 57.9189 |
| 325.845 | 57.8751 |
| 326.18  | 57.8313 |
| 326.519 | 57.7878 |
| 326.854 | 57.7445 |
| 327.172 | 57.7019 |
| 327.513 | 57.6595 |
| 327.845 | 57.6175 |
| 328.193 | 57.5758 |
| 328.533 | 57.5351 |

|         |         |
|---------|---------|
| 328.862 | 57.4942 |
| 329.198 | 57.4535 |
| 329.534 | 57.413  |
| 329.871 | 57.3731 |
| 330.202 | 57.3329 |
| 330.541 | 57.293  |
| 330.869 | 57.2533 |
| 331.204 | 57.214  |
| 331.545 | 57.1746 |
| 331.876 | 57.1355 |
| 332.213 | 57.0964 |
| 332.554 | 57.0576 |
| 332.888 | 57.0186 |
| 333.221 | 56.9793 |
| 333.559 | 56.9399 |
| 333.885 | 56.9004 |
| 334.215 | 56.8611 |
| 334.556 | 56.8221 |
| 334.887 | 56.7833 |
| 335.223 | 56.7448 |
| 335.564 | 56.7067 |
| 335.89  | 56.669  |
| 336.226 | 56.6316 |
| 336.557 | 56.5955 |
| 336.889 | 56.5592 |
| 337.228 | 56.5231 |
| 337.573 | 56.4871 |
| 337.897 | 56.4522 |
| 338.23  | 56.4169 |
| 338.565 | 56.3817 |
| 338.904 | 56.3466 |
| 339.236 | 56.312  |
| 339.57  | 56.2776 |
| 339.908 | 56.2433 |
| 340.244 | 56.2091 |
| 340.567 | 56.1755 |
| 340.903 | 56.1418 |
| 341.24  | 56.1082 |
| 341.578 | 56.0747 |
| 341.907 | 56.0416 |
| 342.242 | 56.0083 |
| 342.578 | 55.9749 |
| 342.91  | 55.9415 |
| 343.24  | 55.9082 |

|         |         |
|---------|---------|
| 343.584 | 55.8749 |
| 343.905 | 55.8416 |
| 344.238 | 55.8083 |
| 344.579 | 55.7748 |
| 344.905 | 55.7414 |
| 345.244 | 55.7081 |
| 345.574 | 55.6749 |
| 345.907 | 55.6422 |
| 346.234 | 55.6097 |
| 346.569 | 55.5772 |
| 346.893 | 55.545  |
| 347.236 | 55.514  |
| 347.568 | 55.4828 |
| 347.903 | 55.4517 |
| 348.235 | 55.4206 |
| 348.567 | 55.3905 |
| 348.903 | 55.3602 |
| 349.23  | 55.33   |
| 349.558 | 55.2999 |
| 349.892 | 55.27   |
| 350.224 | 55.2406 |
| 350.566 | 55.2111 |
| 350.894 | 55.1816 |
| 351.229 | 55.1523 |
| 351.567 | 55.1231 |
| 351.898 | 55.0938 |
| 352.229 | 55.0646 |
| 352.56  | 55.0352 |
| 352.892 | 55.0055 |
| 353.225 | 54.9757 |
| 353.562 | 54.9458 |
| 353.892 | 54.9159 |
| 354.242 | 54.8858 |
| 354.563 | 54.8562 |
| 354.892 | 54.8272 |
| 355.219 | 54.7983 |
| 355.562 | 54.7705 |
| 355.893 | 54.7425 |
| 356.217 | 54.7145 |
| 356.549 | 54.6867 |
| 356.878 | 54.6596 |
| 357.218 | 54.6325 |
| 357.547 | 54.6055 |
| 357.881 | 54.5787 |

|         |         |
|---------|---------|
| 358.21  | 54.5526 |
| 358.538 | 54.5264 |
| 358.876 | 54.5003 |
| 359.202 | 54.4741 |
| 359.54  | 54.4487 |
| 359.866 | 54.4232 |
| 360.194 | 54.3977 |
| 360.53  | 54.3722 |
| 360.866 | 54.347  |
| 361.192 | 54.3217 |
| 361.521 | 54.2963 |
| 361.863 | 54.2709 |
| 362.191 | 54.2454 |
| 362.514 | 54.2196 |
| 362.849 | 54.1937 |
| 363.192 | 54.1679 |
| 363.518 | 54.1418 |
| 363.841 | 54.1158 |
| 364.171 | 54.09   |
| 364.499 | 54.0643 |
| 364.83  | 54.0393 |
| 365.165 | 54.0146 |
| 365.493 | 53.9903 |
| 365.827 | 53.9661 |
| 366.155 | 53.943  |
| 366.486 | 53.9195 |
| 366.809 | 53.8961 |
| 367.151 | 53.8727 |
| 367.491 | 53.8495 |
| 367.811 | 53.8263 |
| 368.138 | 53.8033 |
| 368.471 | 53.7805 |
| 368.806 | 53.7579 |
| 369.13  | 53.7354 |
| 369.458 | 53.7132 |
| 369.788 | 53.691  |
| 370.121 | 53.6692 |
| 370.45  | 53.6473 |
| 370.768 | 53.6252 |
| 371.109 | 53.6032 |
| 371.435 | 53.581  |
| 371.771 | 53.5587 |
| 372.097 | 53.5362 |
| 372.432 | 53.5137 |

|         |         |
|---------|---------|
| 372.771 | 53.491  |
| 373.108 | 53.4686 |
| 373.424 | 53.4466 |
| 373.757 | 53.4247 |
| 374.088 | 53.4037 |
| 374.423 | 53.3828 |
| 374.743 | 53.362  |
| 375.075 | 53.3414 |
| 375.404 | 53.3219 |
| 375.735 | 53.3022 |
| 376.069 | 53.2825 |
| 376.412 | 53.2629 |
| 376.733 | 53.2438 |
| 377.061 | 53.2244 |
| 377.402 | 53.2052 |
| 377.726 | 53.1861 |
| 378.062 | 53.1672 |
| 378.385 | 53.1484 |
| 378.72  | 53.1295 |
| 379.052 | 53.1105 |
| 379.387 | 53.0914 |
| 379.713 | 53.0721 |
| 380.056 | 53.0528 |
| 380.393 | 53.0333 |
| 380.712 | 53.0138 |
| 381.046 | 52.9939 |
| 381.381 | 52.9745 |
| 381.708 | 52.9553 |
| 382.054 | 52.9362 |
| 382.375 | 52.9178 |
| 382.7   | 52.8995 |
| 383.034 | 52.8815 |
| 383.366 | 52.8638 |
| 383.693 | 52.8469 |
| 384.019 | 52.8296 |
| 384.345 | 52.8124 |
| 384.692 | 52.7953 |
| 385.024 | 52.7787 |
| 385.358 | 52.7622 |
| 385.685 | 52.7458 |
| 386.02  | 52.7295 |
| 386.345 | 52.7135 |
| 386.672 | 52.6973 |
| 387.014 | 52.6812 |



|         |         |
|---------|---------|
| 387.336 | 52.665  |
| 387.672 | 52.6487 |
| 388.002 | 52.6322 |
| 388.341 | 52.6154 |
| 388.657 | 52.5984 |
| 388.997 | 52.5811 |
| 389.323 | 52.5641 |
| 389.671 | 52.5473 |
| 389.994 | 52.5306 |
| 390.327 | 52.5143 |
| 390.644 | 52.4982 |
| 390.98  | 52.4823 |
| 391.324 | 52.4665 |
| 391.648 | 52.4514 |
| 391.975 | 52.4361 |
| 392.31  | 52.4209 |
| 392.638 | 52.406  |
| 392.962 | 52.3914 |
| 393.301 | 52.3769 |
| 393.64  | 52.3626 |
| 393.97  | 52.3483 |
| 394.292 | 52.3345 |
| 394.625 | 52.3205 |
| 394.965 | 52.3066 |
| 395.3   | 52.2927 |
| 395.625 | 52.2786 |
| 395.95  | 52.2645 |
| 396.294 | 52.2502 |
| 396.623 | 52.2356 |
| 396.96  | 52.2201 |
| 397.284 | 52.2048 |
| 397.601 | 52.1895 |
| 397.949 | 52.1742 |
| 398.276 | 52.1583 |
| 398.602 | 52.1432 |
| 398.933 | 52.1283 |
| 399.269 | 52.1135 |
| 399.592 | 52.0995 |
| 399.93  | 52.0854 |
| 400.264 | 52.0714 |
| 400.604 | 52.0575 |
| 400.921 | 52.0444 |
| 401.255 | 52.031  |
| 401.592 | 52.0177 |

|         |         |
|---------|---------|
| 401.929 | 52.0044 |
| 402.258 | 51.9917 |
| 402.587 | 51.9785 |
| 402.914 | 51.9653 |
| 403.255 | 51.9523 |
| 403.582 | 51.9394 |
| 403.904 | 51.9262 |
| 404.254 | 51.9133 |
| 404.593 | 51.9002 |
| 404.911 | 51.8869 |
| 405.249 | 51.8732 |
| 405.59  | 51.8594 |
| 405.906 | 51.8455 |
| 406.234 | 51.8314 |
| 406.567 | 51.8166 |
| 406.889 | 51.8021 |
| 407.226 | 51.7876 |
| 407.571 | 51.7732 |
| 407.905 | 51.759  |
| 408.232 | 51.7449 |
| 408.563 | 51.731  |
| 408.889 | 51.7172 |
| 409.227 | 51.7037 |
| 409.557 | 51.6901 |
| 409.882 | 51.6766 |
| 410.22  | 51.6632 |
| 410.551 | 51.6497 |
| 410.88  | 51.6361 |
| 411.215 | 51.6227 |
| 411.552 | 51.6092 |
| 411.878 | 51.5956 |
| 412.211 | 51.5821 |
| 412.55  | 51.5685 |
| 412.879 | 51.5547 |
| 413.2   | 51.5404 |
| 413.537 | 51.5259 |
| 413.871 | 51.5111 |
| 414.196 | 51.4961 |
| 414.53  | 51.48   |
| 414.859 | 51.4645 |
| 415.185 | 51.4492 |
| 415.524 | 51.4338 |
| 415.868 | 51.4183 |
| 416.194 | 51.4029 |

|         |         |
|---------|---------|
| 416.525 | 51.3876 |
| 416.85  | 51.3725 |
| 417.182 | 51.3574 |
| 417.519 | 51.3423 |
| 417.847 | 51.3274 |
| 418.181 | 51.3127 |
| 418.507 | 51.2982 |
| 418.833 | 51.2835 |
| 419.168 | 51.2689 |
| 419.509 | 51.2543 |
| 419.838 | 51.2396 |
| 420.166 | 51.2249 |
| 420.495 | 51.2101 |
| 420.829 | 51.1953 |
| 421.152 | 51.1803 |
| 421.494 | 51.1652 |
| 421.809 | 51.1499 |
| 422.152 | 51.1344 |
| 422.486 | 51.1178 |
| 422.818 | 51.1011 |
| 423.151 | 51.0842 |
| 423.48  | 51.0673 |
| 423.811 | 51.0493 |
| 424.154 | 51.032  |
| 424.473 | 51.0149 |
| 424.811 | 50.9978 |
| 425.141 | 50.9813 |
| 425.466 | 50.965  |
| 425.809 | 50.9488 |
| 426.135 | 50.9326 |
| 426.455 | 50.9166 |
| 426.796 | 50.9004 |
| 427.132 | 50.8842 |
| 427.466 | 50.868  |
| 427.795 | 50.8515 |
| 428.128 | 50.8352 |
| 428.464 | 50.819  |
| 428.8   | 50.8028 |
| 429.123 | 50.7867 |
| 429.448 | 50.7703 |
| 429.786 | 50.7537 |
| 430.115 | 50.7368 |
| 430.455 | 50.7193 |
| 430.792 | 50.7018 |

|         |         |
|---------|---------|
| 431.114 | 50.6841 |
| 431.444 | 50.6663 |
| 431.77  | 50.6474 |
| 432.102 | 50.6287 |
| 432.431 | 50.6099 |
| 432.783 | 50.5911 |
| 433.105 | 50.5721 |
| 433.436 | 50.5535 |
| 433.766 | 50.5349 |
| 434.1   | 50.5164 |
| 434.435 | 50.498  |
| 434.764 | 50.4801 |
| 435.09  | 50.4621 |
| 435.426 | 50.4442 |
| 435.761 | 50.4265 |
| 436.088 | 50.4087 |
| 436.422 | 50.3909 |
| 436.747 | 50.3732 |
| 437.083 | 50.3555 |
| 437.416 | 50.3377 |
| 437.747 | 50.32   |
| 438.074 | 50.3019 |
| 438.407 | 50.2836 |
| 438.742 | 50.2647 |
| 439.079 | 50.2456 |
| 439.402 | 50.2262 |
| 439.733 | 50.2064 |
| 440.068 | 50.1854 |
| 440.403 | 50.1647 |
| 440.728 | 50.1441 |
| 441.072 | 50.1234 |
| 441.392 | 50.1028 |
| 441.723 | 50.0823 |
| 442.061 | 50.0617 |
| 442.389 | 50.041  |
| 442.721 | 50.021  |
| 443.055 | 50.0007 |
| 443.384 | 49.9804 |
| 443.715 | 49.9599 |
| 444.055 | 49.9392 |
| 444.378 | 49.9186 |
| 444.715 | 49.898  |
| 445.045 | 49.8773 |
| 445.376 | 49.8567 |

|         |         |
|---------|---------|
| 445.708 | 49.8361 |
| 446.032 | 49.8154 |
| 446.367 | 49.7946 |
| 446.697 | 49.7737 |
| 447.028 | 49.7524 |
| 447.364 | 49.7307 |
| 447.7   | 49.7089 |
| 448.024 | 49.686  |
| 448.356 | 49.663  |
| 448.689 | 49.6398 |
| 449.008 | 49.6164 |
| 449.361 | 49.5918 |
| 449.69  | 49.5673 |
| 450.023 | 49.5426 |
| 450.358 | 49.5177 |
| 450.691 | 49.4923 |
| 451.024 | 49.4673 |
| 451.358 | 49.4427 |
| 451.69  | 49.4183 |
| 452.031 | 49.3941 |
| 452.35  | 49.3698 |
| 452.686 | 49.3457 |
| 453.024 | 49.3219 |
| 453.346 | 49.2984 |
| 453.683 | 49.2748 |
| 454.031 | 49.2514 |
| 454.352 | 49.2281 |
| 454.689 | 49.2055 |
| 455.022 | 49.1828 |
| 455.345 | 49.1602 |
| 455.686 | 49.1378 |
| 456.02  | 49.116  |
| 456.348 | 49.0942 |
| 456.674 | 49.0725 |
| 457.013 | 49.0511 |
| 457.346 | 49.0297 |
| 457.684 | 49.0084 |
| 458.018 | 48.9868 |
| 458.345 | 48.9651 |
| 458.681 | 48.9433 |
| 459.016 | 48.921  |
| 459.35  | 48.8988 |
| 459.686 | 48.8766 |
| 460.019 | 48.8546 |

|         |         |
|---------|---------|
| 460.352 | 48.8329 |
| 460.668 | 48.8113 |
| 461.004 | 48.7898 |
| 461.343 | 48.7685 |
| 461.672 | 48.7483 |
| 461.999 | 48.7278 |
| 462.335 | 48.7074 |
| 462.665 | 48.6871 |
| 462.988 | 48.667  |
| 463.321 | 48.6466 |
| 463.653 | 48.6263 |
| 463.978 | 48.6059 |
| 464.311 | 48.585  |
| 464.639 | 48.5641 |
| 464.961 | 48.5433 |
| 465.295 | 48.5224 |
| 465.63  | 48.5009 |
| 465.962 | 48.4794 |
| 466.292 | 48.4575 |
| 466.621 | 48.4354 |
| 466.954 | 48.4121 |
| 467.278 | 48.389  |
| 467.611 | 48.3657 |
| 467.933 | 48.3422 |
| 468.265 | 48.3176 |
| 468.598 | 48.2933 |
| 468.927 | 48.2691 |
| 469.255 | 48.245  |
| 469.578 | 48.2205 |
| 469.909 | 48.196  |
| 470.241 | 48.1714 |
| 470.569 | 48.1469 |
| 470.891 | 48.1225 |
| 471.222 | 48.0979 |
| 471.548 | 48.0731 |
| 471.873 | 48.0481 |
| 472.207 | 48.0227 |
| 472.53  | 47.9975 |
| 472.853 | 47.9721 |
| 473.182 | 47.9466 |
| 473.506 | 47.9205 |
| 473.84  | 47.8946 |
| 474.166 | 47.8688 |
| 474.493 | 47.8429 |

|         |         |
|---------|---------|
| 474.817 | 47.8167 |
| 475.148 | 47.7904 |
| 475.478 | 47.7638 |
| 475.802 | 47.737  |
| 476.122 | 47.7091 |
| 476.447 | 47.6813 |
| 476.775 | 47.6533 |
| 477.107 | 47.6252 |
| 477.432 | 47.5959 |
| 477.753 | 47.567  |
| 478.079 | 47.5383 |
| 478.405 | 47.5098 |
| 478.734 | 47.4811 |
| 479.057 | 47.4525 |
| 479.379 | 47.4241 |
| 479.708 | 47.3958 |
| 480.035 | 47.368  |
| 480.36  | 47.3403 |
| 480.67  | 47.3126 |
| 481.009 | 47.285  |
| 481.343 | 47.2577 |
| 481.659 | 47.2301 |
| 481.996 | 47.2025 |
| 482.319 | 47.175  |
| 482.643 | 47.1471 |
| 482.979 | 47.1193 |
| 483.299 | 47.0915 |
| 483.634 | 47.0638 |
| 483.949 | 47.0357 |
| 484.284 | 47.0075 |
| 484.613 | 46.9791 |
| 484.931 | 46.9504 |
| 485.272 | 46.921  |
| 485.607 | 46.8915 |
| 485.941 | 46.8619 |
| 486.262 | 46.8321 |
| 486.592 | 46.8017 |
| 486.928 | 46.7717 |
| 487.262 | 46.7417 |
| 487.589 | 46.7118 |
| 487.92  | 46.6819 |
| 488.253 | 46.6523 |
| 488.585 | 46.6229 |
| 488.918 | 46.5936 |

|         |         |
|---------|---------|
| 489.246 | 46.5644 |
| 489.582 | 46.536  |
| 489.906 | 46.5074 |
| 490.238 | 46.4789 |
| 490.572 | 46.4505 |
| 490.904 | 46.4227 |
| 491.238 | 46.3948 |
| 491.572 | 46.3671 |
| 491.901 | 46.3394 |
| 492.237 | 46.3119 |
| 492.568 | 46.2842 |
| 492.894 | 46.2565 |
| 493.228 | 46.2288 |
| 493.565 | 46.2008 |
| 493.897 | 46.1728 |
| 494.233 | 46.1447 |
| 494.565 | 46.1167 |
| 494.901 | 46.0884 |
| 495.236 | 46.0602 |
| 495.564 | 46.0322 |
| 495.89  | 46.0045 |
| 496.229 | 45.9773 |
| 496.56  | 45.9502 |
| 496.891 | 45.9235 |
| 497.231 | 45.8969 |
| 497.566 | 45.8716 |
| 497.898 | 45.8458 |
| 498.23  | 45.8202 |
| 498.559 | 45.7947 |
| 498.894 | 45.7699 |
| 499.225 | 45.7451 |
| 499.56  | 45.7205 |
| 499.891 | 45.6962 |
| 500.227 | 45.6728 |
| 500.559 | 45.6492 |
| 500.895 | 45.6257 |
| 501.224 | 45.6023 |
| 501.557 | 45.5795 |
| 501.889 | 45.5562 |
| 502.222 | 45.533  |
| 502.553 | 45.5099 |
| 502.885 | 45.4871 |
| 503.23  | 45.4643 |
| 503.557 | 45.4415 |



|         |         |
|---------|---------|
| 503.886 | 45.4188 |
| 504.213 | 45.3964 |
| 504.542 | 45.3738 |
| 504.872 | 45.3512 |
| 505.204 | 45.3285 |
| 505.536 | 45.3058 |
| 505.867 | 45.2832 |
| 506.197 | 45.2607 |
| 506.519 | 45.2383 |
| 506.85  | 45.2165 |
| 507.178 | 45.1947 |
| 507.515 | 45.1732 |
| 507.845 | 45.1518 |
| 508.175 | 45.1314 |
| 508.502 | 45.111  |
| 508.835 | 45.0906 |
| 509.16  | 45.0703 |
| 509.492 | 45.0508 |
| 509.825 | 45.031  |
| 510.16  | 45.0114 |
| 510.485 | 44.992  |
| 510.82  | 44.9726 |
| 511.143 | 44.9535 |
| 511.479 | 44.9343 |
| 511.808 | 44.915  |
| 512.142 | 44.8958 |
| 512.474 | 44.8767 |
| 512.798 | 44.8578 |
| 513.131 | 44.8389 |
| 513.459 | 44.8199 |
| 513.797 | 44.8011 |
| 514.124 | 44.7819 |
| 514.452 | 44.7624 |
| 514.78  | 44.7428 |
| 515.112 | 44.7222 |
| 515.446 | 44.7018 |
| 515.774 | 44.6814 |
| 516.103 | 44.661  |
| 516.434 | 44.6404 |
| 516.764 | 44.6204 |
| 517.105 | 44.6007 |
| 517.429 | 44.5812 |
| 517.762 | 44.5631 |
| 518.089 | 44.5447 |

|         |         |
|---------|---------|
| 518.423 | 44.5265 |
| 518.754 | 44.5084 |
| 519.081 | 44.4909 |
| 519.417 | 44.4733 |
| 519.753 | 44.4556 |
| 520.075 | 44.438  |
| 520.398 | 44.4207 |
| 520.736 | 44.4034 |
| 521.063 | 44.3861 |
| 521.393 | 44.369  |
| 521.723 | 44.3523 |
| 522.049 | 44.3355 |
| 522.376 | 44.3187 |
| 522.698 | 44.3019 |
| 523.036 | 44.2854 |
| 523.367 | 44.2688 |
| 523.694 | 44.2519 |
| 524.021 | 44.2348 |
| 524.348 | 44.2175 |
| 524.681 | 44.2001 |
| 525.004 | 44.1827 |
| 525.336 | 44.1654 |
| 525.661 | 44.1475 |
| 525.991 | 44.1296 |
| 526.323 | 44.1118 |
| 526.66  | 44.0939 |
| 526.983 | 44.0765 |
| 527.311 | 44.0594 |
| 527.632 | 44.0426 |
| 527.957 | 44.026  |
| 528.282 | 44.0104 |
| 528.621 | 43.9945 |
| 528.951 | 43.9786 |
| 529.272 | 43.9628 |
| 529.599 | 43.9475 |
| 529.925 | 43.9319 |
| 530.252 | 43.9164 |
| 530.583 | 43.9011 |
| 530.91  | 43.8861 |
| 531.238 | 43.8711 |
| 531.564 | 43.856  |
| 531.894 | 43.8409 |
| 532.224 | 43.8265 |
| 532.552 | 43.8121 |

|         |         |
|---------|---------|
| 532.879 | 43.7978 |
| 533.199 | 43.7835 |
| 533.526 | 43.7697 |
| 533.855 | 43.7557 |
| 534.182 | 43.7415 |
| 534.507 | 43.7274 |
| 534.838 | 43.7133 |
| 535.161 | 43.6991 |
| 535.487 | 43.6847 |
| 535.816 | 43.6701 |
| 536.136 | 43.655  |
| 536.459 | 43.6399 |
| 536.781 | 43.6248 |
| 537.111 | 43.6099 |
| 537.44  | 43.5949 |
| 537.763 | 43.5804 |
| 538.081 | 43.5665 |
| 538.411 | 43.5527 |
| 538.749 | 43.5402 |
| 539.081 | 43.5273 |
| 539.4   | 43.5144 |
| 539.72  | 43.5018 |
| 540.048 | 43.4898 |
| 540.376 | 43.4775 |
| 540.697 | 43.4654 |
| 541.023 | 43.4533 |
| 541.35  | 43.4412 |
| 541.678 | 43.4295 |
| 541.999 | 43.4178 |
| 542.327 | 43.4063 |
| 542.651 | 43.395  |
| 542.977 | 43.3841 |
| 543.304 | 43.3731 |
| 543.627 | 43.3621 |
| 543.966 | 43.3511 |
| 544.285 | 43.3403 |
| 544.611 | 43.3293 |
| 544.934 | 43.3183 |
| 545.266 | 43.3073 |
| 545.587 | 43.2962 |
| 545.911 | 43.2851 |
| 546.243 | 43.2739 |
| 546.566 | 43.2625 |
| 546.892 | 43.2508 |

|         |         |
|---------|---------|
| 547.216 | 43.239  |
| 547.543 | 43.2272 |
| 547.87  | 43.2155 |
| 548.199 | 43.2037 |
| 548.528 | 43.1924 |
| 548.848 | 43.1814 |
| 549.174 | 43.1706 |
| 549.494 | 43.161  |
| 549.829 | 43.1511 |
| 550.157 | 43.1413 |
| 550.475 | 43.1318 |
| 550.803 | 43.1229 |
| 551.139 | 43.1138 |
| 551.454 | 43.1048 |
| 551.78  | 43.0957 |
| 552.112 | 43.0869 |
| 552.436 | 43.0781 |
| 552.762 | 43.0693 |
| 553.09  | 43.0608 |
| 553.414 | 43.0523 |
| 553.739 | 43.0439 |
| 554.07  | 43.0356 |
| 554.396 | 43.0272 |
| 554.727 | 43.0193 |
| 555.046 | 43.0113 |
| 555.376 | 43.0031 |
| 555.699 | 42.995  |
| 556.029 | 42.9869 |
| 556.358 | 42.9787 |
| 556.692 | 42.9705 |
| 557.009 | 42.9623 |
| 557.337 | 42.9539 |
| 557.667 | 42.9456 |
| 557.994 | 42.9372 |
| 558.319 | 42.9286 |
| 558.642 | 42.9199 |
| 558.976 | 42.911  |
| 559.3   | 42.902  |
| 559.624 | 42.893  |
| 559.949 | 42.8838 |
| 560.28  | 42.8752 |
| 560.601 | 42.8666 |
| 560.928 | 42.8581 |
| 561.255 | 42.8507 |

|         |         |
|---------|---------|
| 561.589 | 42.8429 |
| 561.925 | 42.8351 |
| 562.247 | 42.8275 |
| 562.573 | 42.8205 |
| 562.897 | 42.8135 |
| 563.228 | 42.8065 |
| 563.553 | 42.7996 |
| 563.879 | 42.7929 |
| 564.213 | 42.7867 |
| 564.539 | 42.7803 |
| 564.871 | 42.7741 |
| 565.197 | 42.7681 |
| 565.526 | 42.7621 |
| 565.858 | 42.7562 |
| 566.185 | 42.7504 |
| 566.513 | 42.7445 |
| 566.836 | 42.7387 |
| 567.172 | 42.7333 |
| 567.502 | 42.7276 |
| 567.832 | 42.7218 |
| 568.16  | 42.7162 |
| 568.483 | 42.7106 |
| 568.822 | 42.7048 |
| 569.142 | 42.6991 |
| 569.476 | 42.6939 |
| 569.799 | 42.6887 |
| 570.133 | 42.6833 |
| 570.471 | 42.6781 |
| 570.795 | 42.674  |
| 571.13  | 42.6694 |
| 571.461 | 42.6644 |
| 571.787 | 42.6591 |
| 572.113 | 42.6542 |
| 572.441 | 42.6493 |
| 572.77  | 42.6442 |
| 573.108 | 42.6386 |
| 573.443 | 42.6329 |
| 573.77  | 42.6276 |
| 574.105 | 42.6228 |
| 574.433 | 42.6182 |
| 574.761 | 42.6141 |
| 575.09  | 42.6096 |
| 575.42  | 42.605  |
| 575.749 | 42.6007 |

|         |         |
|---------|---------|
| 576.075 | 42.5975 |
| 576.402 | 42.5943 |
| 576.731 | 42.5911 |
| 577.053 | 42.5877 |
| 577.378 | 42.5845 |
| 577.703 | 42.5812 |
| 578.031 | 42.578  |
| 578.363 | 42.5751 |
| 578.691 | 42.5716 |
| 579.013 | 42.5681 |
| 579.335 | 42.5646 |
| 579.661 | 42.5612 |
| 579.978 | 42.5586 |
| 580.298 | 42.5557 |
| 580.616 | 42.5523 |
| 580.937 | 42.5486 |
| 581.261 | 42.5452 |
| 581.576 | 42.5411 |
| 581.896 | 42.5366 |
| 582.208 | 42.5321 |
| 582.522 | 42.5273 |
| 582.835 | 42.523  |
| 583.16  | 42.5184 |
| 583.479 | 42.5135 |
| 583.806 | 42.5094 |
| 584.125 | 42.5047 |
| 584.444 | 42.4993 |
| 584.77  | 42.4937 |
| 585.086 | 42.4874 |
| 585.404 | 42.4813 |
| 585.737 | 42.4748 |
| 586.058 | 42.4679 |
| 586.375 | 42.4612 |
| 586.702 | 42.4551 |
| 587.022 | 42.4492 |
| 587.343 | 42.4432 |
| 587.677 | 42.4383 |
| 588.004 | 42.4333 |
| 588.32  | 42.428  |
| 588.651 | 42.4224 |
| 588.975 | 42.4176 |
| 589.307 | 42.4123 |
| 589.624 | 42.4068 |
| 589.954 | 42.4014 |

|         |         |
|---------|---------|
| 590.283 | 42.3965 |
| 590.607 | 42.3913 |
| 590.93  | 42.3859 |
| 591.254 | 42.3806 |
| 591.589 | 42.3757 |
| 591.91  | 42.3703 |
| 592.234 | 42.3648 |
| 592.557 | 42.3593 |
| 592.883 | 42.3528 |
| 593.21  | 42.3467 |
| 593.54  | 42.3405 |
| 593.864 | 42.3342 |
| 594.191 | 42.3282 |
| 594.521 | 42.322  |
| 594.85  | 42.3157 |
| 595.178 | 42.3096 |
| 595.509 | 42.3034 |
| 595.837 | 42.2971 |
| 596.165 | 42.291  |
| 596.494 | 42.2845 |
| 596.822 | 42.2779 |
| 597.155 | 42.2711 |
| 597.485 | 42.2643 |
| 597.82  | 42.2575 |
| 598.145 | 42.2506 |
| 598.473 | 42.243  |
| 598.814 | 42.2355 |
| 599.134 | 42.2278 |
| 599.464 | 42.2202 |
| 599.798 | 42.2114 |
| 600.133 | 42.2028 |
| 600.459 | 42.194  |
| 600.792 | 42.185  |
| 601.113 | 42.1755 |
| 601.444 | 42.1662 |
| 601.778 | 42.157  |
| 602.107 | 42.1477 |
| 602.443 | 42.1383 |
| 602.775 | 42.1289 |
| 603.111 | 42.1195 |
| 603.432 | 42.1101 |
| 603.764 | 42.1009 |
| 604.097 | 42.0917 |
| 604.426 | 42.0826 |

|         |         |
|---------|---------|
| 604.757 | 42.0736 |
| 605.083 | 42.0649 |
| 605.413 | 42.0562 |
| 605.747 | 42.0474 |
| 606.079 | 42.0386 |
| 606.411 | 42.0296 |
| 606.744 | 42.0205 |
| 607.067 | 42.0113 |
| 607.394 | 42.0021 |
| 607.726 | 41.9926 |
| 608.054 | 41.9834 |
| 608.384 | 41.9743 |
| 608.718 | 41.9652 |
| 609.048 | 41.9563 |
| 609.371 | 41.9473 |
| 609.7   | 41.9384 |
| 610.03  | 41.9295 |
| 610.357 | 41.9206 |
| 610.691 | 41.9115 |
| 611.023 | 41.9024 |
| 611.341 | 41.8934 |
| 611.67  | 41.8842 |
| 611.993 | 41.8751 |
| 612.323 | 41.8661 |
| 612.664 | 41.8571 |
| 612.997 | 41.8481 |
| 613.325 | 41.839  |
| 613.651 | 41.8298 |
| 613.985 | 41.8206 |
| 614.314 | 41.8112 |
| 614.64  | 41.8019 |
| 614.966 | 41.7927 |
| 615.299 | 41.7835 |
| 615.625 | 41.7743 |
| 615.956 | 41.7653 |
| 616.282 | 41.7563 |
| 616.614 | 41.7474 |
| 616.943 | 41.7386 |
| 617.267 | 41.7298 |
| 617.605 | 41.721  |
| 617.934 | 41.712  |
| 618.269 | 41.703  |
| 618.602 | 41.6938 |
| 618.932 | 41.6847 |



|         |         |
|---------|---------|
| 619.258 | 41.6756 |
| 619.586 | 41.6664 |
| 619.919 | 41.6573 |
| 620.254 | 41.6481 |
| 620.589 | 41.6389 |
| 620.923 | 41.6297 |
| 621.251 | 41.6204 |
| 621.585 | 41.6111 |
| 621.915 | 41.6018 |
| 622.247 | 41.5926 |
| 622.583 | 41.5838 |
| 622.914 | 41.5751 |
| 623.248 | 41.5665 |
| 623.578 | 41.5581 |
| 623.916 | 41.5505 |
| 624.262 | 41.5426 |
| 624.603 | 41.5347 |
| 624.933 | 41.5267 |
| 625.271 | 41.5188 |
| 625.599 | 41.5107 |
| 625.932 | 41.5024 |
| 626.273 | 41.494  |
| 626.614 | 41.4849 |
| 626.952 | 41.4759 |
| 627.291 | 41.4669 |
| 627.626 | 41.4578 |
| 627.956 | 41.4479 |
| 628.293 | 41.4382 |
| 628.635 | 41.4284 |
| 628.982 | 41.4185 |
| 629.317 | 41.4083 |
| 629.659 | 41.3983 |
| 629.999 | 41.3883 |
| 630.34  | 41.3783 |
| 630.677 | 41.3682 |
| 631.016 | 41.3579 |
| 631.352 | 41.3475 |
| 631.701 | 41.337  |
| 632.041 | 41.3262 |
| 632.378 | 41.3155 |
| 632.716 | 41.3047 |
| 633.071 | 41.2937 |
| 633.409 | 41.2824 |
| 633.752 | 41.2711 |

|         |         |
|---------|---------|
| 634.094 | 41.26   |
| 634.428 | 41.249  |
| 634.768 | 41.2381 |
| 635.107 | 41.2276 |
| 635.452 | 41.2174 |
| 635.791 | 41.2073 |
| 636.137 | 41.198  |
| 636.478 | 41.1881 |
| 636.824 | 41.178  |
| 637.167 | 41.168  |
| 637.511 | 41.1576 |
| 637.847 | 41.1471 |
| 638.182 | 41.1363 |
| 638.519 | 41.1252 |
| 638.851 | 41.1129 |
| 639.192 | 41.1007 |
| 639.525 | 41.0883 |
| 639.858 | 41.0757 |
| 640.195 | 41.0618 |
| 640.516 | 41.0483 |
| 640.85  | 41.0347 |
| 641.182 | 41.021  |
| 641.516 | 41.0064 |
| 641.84  | 40.9919 |
| 642.169 | 40.9774 |
| 642.501 | 40.9629 |
| 642.828 | 40.9478 |
| 643.151 | 40.9331 |
| 643.485 | 40.9182 |
| 643.812 | 40.9033 |
| 644.136 | 40.8886 |
| 644.469 | 40.8739 |
| 644.805 | 40.8592 |
| 645.142 | 40.8444 |
| 645.475 | 40.8294 |
| 645.806 | 40.8143 |
| 646.147 | 40.7992 |
| 646.487 | 40.784  |
| 646.821 | 40.7678 |
| 647.155 | 40.7518 |
| 647.501 | 40.7356 |
| 647.847 | 40.7194 |
| 648.196 | 40.7032 |
| 648.547 | 40.6865 |

|         |         |
|---------|---------|
| 648.906 | 40.6703 |
| 649.268 | 40.6542 |
| 649.625 | 40.6382 |
| 649.991 | 40.6227 |
| 650.369 | 40.6058 |
| 650.864 | 40.5846 |
| 651.587 | 40.5585 |
| 652.482 | 40.5185 |
| 653.449 | 40.4858 |
| 654.417 | 40.4381 |
| 655.356 | 40.3624 |
| 656.271 | 40.2039 |
| 657.144 | 40.0552 |
| 657.995 | 39.8907 |
| 658.802 | 39.7286 |
| 659.58  | 39.5364 |
| 660.326 | 39.353  |
| 661.028 | 39.1685 |
| 661.714 | 38.9823 |
| 662.366 | 38.7852 |
| 662.994 | 38.592  |
| 663.573 | 38.3987 |
| 664.138 | 38.2047 |
| 664.675 | 38.0081 |
| 665.2   | 37.8124 |
| 665.707 | 37.6168 |
| 666.191 | 37.4211 |
| 666.668 | 37.2247 |
| 667.124 | 37.0288 |
| 667.57  | 36.8332 |
| 668.005 | 36.6379 |
| 668.428 | 36.4436 |
| 668.845 | 36.2494 |
| 669.247 | 36.0555 |
| 669.65  | 35.8618 |
| 670.04  | 35.67   |
| 670.43  | 35.4781 |
| 670.807 | 35.2866 |
| 671.173 | 35.0955 |
| 671.539 | 34.9063 |
| 671.898 | 34.717  |
| 672.244 | 34.5282 |
| 672.603 | 34.3399 |
| 672.951 | 34.1539 |

|         |         |
|---------|---------|
| 673.293 | 33.9676 |
| 673.63  | 33.782  |
| 673.963 | 33.5968 |
| 674.304 | 33.4143 |
| 674.634 | 33.2315 |
| 674.96  | 33.0488 |
| 675.285 | 32.8665 |
| 675.602 | 32.6862 |
| 675.922 | 32.5047 |
| 676.236 | 32.3228 |
| 676.555 | 32.1407 |
| 676.862 | 31.9572 |
| 677.157 | 31.7734 |
| 677.451 | 31.5886 |
| 677.744 | 31.403  |
| 678.042 | 31.2134 |
| 678.322 | 31.0236 |
| 678.601 | 30.8326 |
| 678.886 | 30.6405 |
| 679.155 | 30.4421 |
| 679.424 | 30.2437 |
| 679.683 | 30.0432 |
| 679.949 | 29.8398 |
| 680.208 | 29.6344 |
| 680.462 | 29.4187 |
| 680.707 | 29.2045 |
| 680.942 | 28.9882 |
| 681.181 | 28.7701 |
| 681.413 | 28.5428 |
| 681.637 | 28.3183 |
| 681.862 | 28.0942 |
| 682.081 | 27.8705 |
| 682.298 | 27.647  |
| 682.512 | 27.4289 |
| 682.71  | 27.2164 |
| 682.905 | 27.0082 |
| 683.094 | 26.8182 |
| 683.212 | 26.626  |
| 683.049 | 26.4559 |
| 682.741 | 26.3002 |
| 682.455 | 26.1782 |
| 682.22  | 26.0798 |
| 682.015 | 26.0127 |
| 681.852 | 25.955  |

|         |         |
|---------|---------|
| 681.731 | 25.9045 |
| 681.635 | 25.8468 |
| 681.575 | 25.7895 |
| 681.551 | 25.7323 |
| 681.544 | 25.6745 |
| 681.565 | 25.6148 |
| 681.619 | 25.5536 |
| 681.683 | 25.4913 |
| 681.775 | 25.4234 |
| 681.888 | 25.3569 |
| 682.006 | 25.2895 |
| 682.142 | 25.2215 |
| 682.306 | 25.1497 |
| 682.47  | 25.0791 |
| 682.648 | 25.0084 |
| 682.842 | 24.9374 |
| 683.039 | 24.8645 |
| 683.249 | 24.792  |
| 683.464 | 24.7195 |
| 683.692 | 24.6468 |
| 683.933 | 24.5731 |
| 684.17  | 24.4999 |
| 684.417 | 24.4266 |
| 684.67  | 24.3532 |
| 684.932 | 24.2791 |
| 685.194 | 24.2049 |
| 685.464 | 24.1307 |
| 685.735 | 24.0565 |
| 686.007 | 23.9813 |
| 686.297 | 23.9069 |
| 686.585 | 23.8328 |
| 686.864 | 23.7588 |
| 687.154 | 23.6853 |
| 687.458 | 23.6117 |
| 687.749 | 23.5381 |
| 688.051 | 23.4644 |
| 688.359 | 23.3909 |
| 688.653 | 23.3172 |
| 688.956 | 23.2434 |
| 689.259 | 23.1694 |
| 689.576 | 23.095  |
| 689.877 | 23.0207 |
| 690.195 | 22.9465 |
| 690.501 | 22.8721 |

|         |         |
|---------|---------|
| 690.823 | 22.7974 |
| 691.138 | 22.723  |
| 691.449 | 22.649  |
| 691.767 | 22.5753 |
| 692.086 | 22.502  |
| 692.396 | 22.4288 |
| 692.721 | 22.3562 |
| 693.04  | 22.2839 |
| 693.362 | 22.2132 |
| 693.694 | 22.1424 |
| 694.018 | 22.0722 |
| 694.335 | 22.0025 |
| 694.65  | 21.9355 |
| 694.978 | 21.8687 |
| 695.313 | 21.803  |
| 695.639 | 21.7381 |
| 695.969 | 21.6773 |
| 696.296 | 21.6162 |
| 696.634 | 21.5565 |
| 696.962 | 21.4981 |
| 697.292 | 21.4449 |
| 697.627 | 21.3917 |
| 697.961 | 21.3401 |
| 698.295 | 21.2899 |
| 698.64  | 21.2472 |
| 698.975 | 21.204  |
| 699.312 | 21.163  |
| 699.648 | 21.125  |
| 699.997 | 21.0894 |
| 700.348 | 21.0646 |
| 700.703 | 21.0387 |
| 701.04  | 21.015  |
| 701.387 | 20.9931 |
| 701.728 | 20.9823 |
| 702.075 | 20.9686 |
| 702.416 | 20.9557 |
| 702.762 | 20.9441 |
| 703.09  | 20.9392 |
| 703.421 | 20.932  |
| 703.772 | 20.9248 |
| 704.11  | 20.9181 |
| 704.442 | 20.9146 |
| 704.786 | 20.9104 |
| 705.123 | 20.9067 |

|         |         |
|---------|---------|
| 705.449 | 20.9033 |
| 705.784 | 20.9009 |
| 706.121 | 20.8974 |
| 706.458 | 20.8941 |
| 706.782 | 20.891  |
| 707.109 | 20.888  |
| 707.444 | 20.8855 |
| 707.775 | 20.8834 |
| 708.104 | 20.8815 |
| 708.444 | 20.8798 |
| 708.773 | 20.8772 |
| 709.098 | 20.8746 |
| 709.439 | 20.8721 |
| 709.763 | 20.8689 |
| 710.088 | 20.8666 |
| 710.411 | 20.8648 |
| 710.743 | 20.8632 |
| 711.074 | 20.8631 |
| 711.405 | 20.8623 |
| 711.73  | 20.8606 |
| 712.066 | 20.8583 |
| 712.391 | 20.8558 |
| 712.715 | 20.8534 |
| 713.037 | 20.8511 |
| 713.372 | 20.8489 |
| 713.696 | 20.8466 |
| 714.015 | 20.8448 |
| 714.348 | 20.8435 |
| 714.671 | 20.8423 |
| 715     | 20.8425 |
| 715.33  | 20.8419 |
| 715.666 | 20.8406 |
| 715.995 | 20.8387 |
| 716.33  | 20.8363 |
| 716.652 | 20.8341 |
| 716.987 | 20.832  |
| 717.31  | 20.83   |
| 717.633 | 20.8278 |
| 717.961 | 20.8261 |
| 718.287 | 20.8249 |
| 718.617 | 20.8238 |
| 718.95  | 20.8239 |
| 719.281 | 20.8236 |
| 719.612 | 20.823  |

|         |         |
|---------|---------|
| 719.943 | 20.8219 |
| 720.262 | 20.8198 |
| 720.602 | 20.8177 |
| 720.919 | 20.8156 |
| 721.241 | 20.8136 |
| 721.562 | 20.8105 |
| 721.892 | 20.8086 |
| 722.231 | 20.8071 |
| 722.552 | 20.8058 |
| 722.886 | 20.8048 |
| 723.204 | 20.8052 |
| 723.527 | 20.8048 |
| 723.866 | 20.8035 |
| 724.19  | 20.8016 |
| 724.515 | 20.7993 |
| 724.844 | 20.7972 |
| 725.171 | 20.7952 |
| 725.503 | 20.7933 |
| 725.836 | 20.7912 |
| 726.166 | 20.7898 |
| 726.489 | 20.7886 |
| 726.812 | 20.7876 |
| 727.136 | 20.7877 |
| 727.472 | 20.7874 |
| 727.799 | 20.7871 |
| 728.121 | 20.7869 |
| 728.456 | 20.7865 |
| 728.79  | 20.7853 |
| 729.116 | 20.7834 |
| 729.44  | 20.7814 |
| 729.769 | 20.7785 |
| 730.101 | 20.7763 |
| 730.434 | 20.7744 |
| 730.758 | 20.7727 |
| 731.084 | 20.7716 |
| 731.417 | 20.7706 |
| 731.738 | 20.7698 |
| 732.066 | 20.7691 |
| 732.388 | 20.769  |
| 732.715 | 20.7678 |
| 733.051 | 20.7658 |
| 733.377 | 20.7636 |
| 733.702 | 20.7607 |
| 734.039 | 20.7583 |



|         |         |
|---------|---------|
| 734.365 | 20.7562 |
| 734.695 | 20.7542 |
| 735.023 | 20.7526 |
| 735.347 | 20.7513 |
| 735.677 | 20.7503 |
| 736.002 | 20.7494 |
| 736.329 | 20.7489 |
| 736.66  | 20.7473 |
| 736.989 | 20.7452 |
| 737.319 | 20.743  |
| 737.643 | 20.74   |
| 737.978 | 20.7378 |
| 738.303 | 20.7359 |
| 738.633 | 20.7341 |
| 738.962 | 20.7332 |
| 739.29  | 20.7322 |
| 739.623 | 20.7314 |
| 739.947 | 20.7307 |
| 740.27  | 20.7296 |
| 740.606 | 20.7276 |
| 740.93  | 20.7255 |
| 741.258 | 20.7234 |
| 741.585 | 20.7201 |
| 741.909 | 20.7179 |
| 742.239 | 20.7161 |
| 742.569 | 20.7146 |
| 742.902 | 20.7143 |
| 743.232 | 20.7136 |
| 743.551 | 20.7131 |
| 743.89  | 20.7126 |
| 744.217 | 20.7127 |
| 744.538 | 20.7125 |
| 744.87  | 20.712  |
| 745.192 | 20.711  |
| 745.521 | 20.7089 |
| 745.85  | 20.7068 |
| 746.178 | 20.7048 |
| 746.506 | 20.7028 |
| 746.842 | 20.6999 |
| 747.165 | 20.698  |
| 747.498 | 20.6966 |
| 747.824 | 20.6953 |
| 748.149 | 20.6955 |
| 748.481 | 20.6951 |

|         |         |
|---------|---------|
| 748.812 | 20.6942 |
| 749.139 | 20.6928 |
| 749.468 | 20.6907 |
| 749.792 | 20.6885 |
| 750.127 | 20.6864 |
| 750.463 | 20.6843 |
| 750.799 | 20.6815 |
| 751.126 | 20.6796 |
| 751.449 | 20.6781 |
| 751.778 | 20.6768 |
| 752.101 | 20.677  |
| 752.434 | 20.6767 |
| 752.769 | 20.6763 |
| 753.095 | 20.6761 |
| 753.421 | 20.6759 |
| 753.752 | 20.6758 |
| 754.08  | 20.675  |
| 754.411 | 20.6733 |
| 754.753 | 20.6713 |
| 755.078 | 20.6684 |
| 755.409 | 20.666  |
| 755.727 | 20.6638 |
| 756.061 | 20.6616 |
| 756.394 | 20.6592 |
| 756.717 | 20.657  |
| 757.046 | 20.6549 |
| 757.381 | 20.6528 |
| 757.714 | 20.651  |
| 758.043 | 20.6489 |
| 758.361 | 20.6462 |
| 758.691 | 20.6429 |
| 759.023 | 20.639  |
| 759.352 | 20.6355 |
| 759.685 | 20.6322 |
| 760.007 | 20.6292 |
| 760.342 | 20.6263 |
| 760.674 | 20.6241 |
| 761     | 20.6223 |
| 761.321 | 20.6207 |
| 761.657 | 20.6209 |
| 761.988 | 20.6204 |
| 762.319 | 20.6199 |
| 762.656 | 20.6195 |
| 762.986 | 20.6189 |

|         |         |
|---------|---------|
| 763.314 | 20.6174 |
| 763.643 | 20.6154 |
| 763.971 | 20.6134 |
| 764.301 | 20.6104 |
| 764.632 | 20.6082 |
| 764.962 | 20.6064 |
| 765.28  | 20.6047 |
| 765.611 | 20.604  |
| 765.942 | 20.6031 |
| 766.272 | 20.6024 |
| 766.604 | 20.6018 |
| 766.939 | 20.6019 |
| 767.259 | 20.6016 |
| 767.585 | 20.6006 |
| 767.922 | 20.5991 |
| 768.255 | 20.5968 |
| 768.589 | 20.5948 |
| 768.925 | 20.5928 |
| 769.257 | 20.5908 |
| 769.577 | 20.5884 |
| 769.896 | 20.5867 |
| 770.222 | 20.5854 |
| 770.551 | 20.5843 |
| 770.88  | 20.5844 |
| 771.216 | 20.5841 |
| 771.554 | 20.5837 |
| 771.893 | 20.5829 |
| 772.218 | 20.5812 |
| 772.539 | 20.5792 |
| 772.857 | 20.5771 |
| 773.199 | 20.575  |
| 773.525 | 20.5717 |
| 773.857 | 20.5696 |
| 774.186 | 20.5679 |
| 774.514 | 20.5664 |
| 774.849 | 20.5661 |
| 775.182 | 20.5651 |
| 775.512 | 20.5639 |
| 775.84  | 20.5626 |
| 776.169 | 20.5613 |
| 776.494 | 20.558  |
| 776.826 | 20.5542 |
| 777.161 | 20.5504 |
| 777.489 | 20.5466 |

|         |         |
|---------|---------|
| 777.809 | 20.5413 |
| 778.147 | 20.5375 |
| 778.477 | 20.5345 |
| 778.803 | 20.5317 |
| 779.141 | 20.5311 |
| 779.463 | 20.5299 |
| 779.785 | 20.5288 |
| 780.121 | 20.5279 |
| 780.452 | 20.528  |
| 780.786 | 20.5277 |
| 781.111 | 20.5271 |
| 781.451 | 20.526  |
| 781.781 | 20.5239 |
| 782.107 | 20.5218 |
| 782.426 | 20.5197 |
| 782.753 | 20.5177 |
| 783.091 | 20.5147 |
| 783.425 | 20.5127 |
| 783.757 | 20.5112 |
| 784.092 | 20.5099 |
| 784.424 | 20.5101 |
| 784.75  | 20.5097 |
| 785.073 | 20.5094 |
| 785.41  | 20.5091 |
| 785.742 | 20.5092 |
| 786.071 | 20.509  |
| 786.401 | 20.5085 |
| 786.737 | 20.5075 |
| 787.068 | 20.5054 |
| 787.395 | 20.5033 |
| 787.72  | 20.5013 |
| 788.057 | 20.4994 |
| 788.391 | 20.4965 |
| 788.724 | 20.4946 |
| 789.055 | 20.4932 |
| 789.385 | 20.492  |
| 789.711 | 20.4921 |
| 790.046 | 20.4918 |
| 790.369 | 20.4914 |
| 790.689 | 20.4912 |
| 791.017 | 20.4911 |
| 791.349 | 20.4908 |
| 791.688 | 20.4898 |
| 792.03  | 20.4881 |

|         |         |
|---------|---------|
| 792.36  | 20.486  |
| 792.691 | 20.4838 |
| 793.017 | 20.4814 |
| 793.341 | 20.4788 |
| 793.671 | 20.4759 |
| 794.006 | 20.4728 |
| 794.339 | 20.4698 |
| 794.667 | 20.4672 |
| 794.988 | 20.4652 |
| 795.322 | 20.4634 |
| 795.658 | 20.4616 |
| 795.993 | 20.46   |
| 796.329 | 20.4586 |
| 796.649 | 20.4574 |
| 796.987 | 20.4564 |
| 797.315 | 20.4557 |
| 797.64  | 20.4551 |
| 797.971 | 20.4548 |
| 798.295 | 20.4546 |

|         |      |         |
|---------|------|---------|
| xrd40kg | 5    | 5564.98 |
|         | 5.01 | 5721    |
|         | 5.02 | 6015.72 |
|         | 5.03 | 5807.68 |
|         | 5.04 | 5686.33 |
|         | 5.05 | 6015.72 |
|         | 5.06 | 6189.08 |
|         | 5.07 | 5790.35 |
|         | 5.08 | 5599.65 |
|         | 5.09 | 5842.36 |
|         | 5.1  | 5929.04 |
|         | 5.11 | 6067.73 |
|         | 5.12 | 5877.03 |
|         | 5.13 | 5738.34 |
|         | 5.14 | 5478.29 |
|         | 5.15 | 5738.34 |
|         | 5.16 | 5738.34 |
|         | 5.17 | 6258.43 |
|         | 5.18 | 5963.71 |
|         | 5.19 | 5981.05 |
|         | 5.2  | 6154.41 |
|         | 5.21 | 6119.74 |
|         | 5.22 | 5790.35 |
|         | 5.23 | 5963.71 |

5.24 5564.98  
5.25 5703.67  
5.26 5790.35  
5.27 6067.73  
5.28 6431.79  
5.29 5755.67  
5.3 5738.34  
5.31 5582.31  
5.32 6275.77  
5.33 6379.78  
5.34 5877.03  
5.35 5287.59  
5.36 5738.34  
5.37 6015.72  
5.38 6085.07  
5.39 6345.11  
5.4 6119.74  
5.41 5582.31  
5.42 5738.34  
5.43 6327.78  
5.44 6605.16  
5.45 5807.68  
5.46 5911.7  
5.47 6275.77  
5.48 5773.01  
5.49 6345.11  
5.5 5859.69  
5.51 5929.04  
5.52 5963.71  
5.53 5842.36  
5.54 6154.41  
5.55 5512.97  
5.56 5825.02  
5.57 6171.75  
5.58 5963.71  
5.59 6379.78  
5.6 6154.41  
5.61 5773.01  
5.62 6379.78  
5.63 6327.78  
5.64 5790.35  
5.65 5859.69  
5.66 6067.73  
5.67 6397.12

5.68 6154.41  
5.69 6830.53  
5.7 6154.41  
5.71 5703.67  
5.72 5530.3  
5.73 6379.78  
5.74 6119.74  
5.75 6275.77  
5.76 6154.41  
5.77 6345.11  
5.78 5530.3  
5.79 6258.43  
5.8 6345.11  
5.81 6223.76  
5.82 6449.13  
5.83 5634.32  
5.84 6050.39  
5.85 6119.74  
5.86 5929.04  
5.87 5963.71  
5.88 6293.1  
5.89 6171.75  
5.9 6674.5  
5.91 6119.74  
5.92 6865.2  
5.93 5703.67  
5.94 6275.77  
5.95 5981.05  
5.96 5998.38  
5.97 5981.05  
5.98 5825.02  
5.99 6206.42  
6 6241.09  
6.01 6362.45  
6.02 6345.11  
6.03 6483.8  
6.04 5929.04  
6.05 6050.39  
6.06 5894.37  
6.07 6293.1  
6.08 6605.16  
6.09 6206.42  
6.1 6171.75  
6.11 5651.66

6.12 6015.72  
6.13 6414.46  
6.14 6050.39  
6.15 5877.03  
6.16 5963.71  
6.17 6189.08  
6.18 6431.79  
6.19 6535.81  
6.2 6639.83  
6.21 6189.08  
6.22 6137.08  
6.23 6345.11  
6.24 6102.4  
6.25 5842.36  
6.26 6275.77  
6.27 5963.71  
6.28 5998.38  
6.29 6310.44  
6.3 5668.99  
6.31 6293.1  
6.32 6015.72  
6.33 6137.08  
6.34 6258.43  
6.35 6241.09  
6.36 6483.8  
6.37 6050.39  
6.38 6535.81  
6.39 5859.69  
6.4 6015.72  
6.41 6258.43  
6.42 5738.34  
6.43 6431.79  
6.44 6345.11  
6.45 5721  
6.46 6033.06  
6.47 6951.88  
6.48 5634.32  
6.49 6327.78  
6.5 5859.69  
6.51 6865.2  
6.52 5877.03  
6.53 5651.66  
6.54 6033.06  
6.55 6622.49



6.56 6293.1  
6.57 6015.72  
6.58 7003.89  
6.59 6015.72  
6.6 6327.78  
6.61 6189.08  
6.62 5755.67  
6.63 6067.73  
6.64 5929.04  
6.65 6102.4  
6.66 6587.82  
6.67 6223.76  
6.68 6310.44  
6.69 6501.14  
6.7 6345.11  
6.71 6431.79  
6.72 6674.5  
6.73 6206.42  
6.74 5825.02  
6.75 5981.05  
6.76 5981.05  
6.77 6449.13  
6.78 5963.71  
6.79 6102.4  
6.8 6119.74  
6.81 6206.42  
6.82 6466.47  
6.83 6466.47  
6.84 5998.38  
6.85 5981.05  
6.86 6067.73  
6.87 6171.75  
6.88 5963.71  
6.89 6137.08  
6.9 6414.46  
6.91 6206.42  
6.92 6622.49  
6.93 6553.15  
6.94 6310.44  
6.95 6431.79  
6.96 6743.85  
6.97 6345.11  
6.98 6137.08  
6.99 5894.37

7 6362.45  
7.01 6535.81  
7.02 6605.16  
7.03 6154.41  
7.04 6223.76  
7.05 6449.13  
7.06 6379.78  
7.07 5963.71  
7.08 6379.78  
7.09 6189.08  
7.1 5773.01  
7.11 6431.79  
7.12 6275.77  
7.13 6778.52  
7.14 5703.67  
7.15 5842.36  
7.16 5807.68  
7.17 5755.67  
7.18 5825.02  
7.19 6258.43  
7.2 6067.73  
7.21 6258.43  
7.22 6033.06  
7.23 5842.36  
7.24 5981.05  
7.25 6275.77  
7.26 6362.45  
7.27 5946.38  
7.28 5807.68  
7.29 5894.37  
7.3 6206.42  
7.31 6206.42  
7.32 5894.37  
7.33 6102.4  
7.34 6258.43  
7.35 5634.32  
7.36 5963.71  
7.37 6171.75  
7.38 5998.38  
7.39 6293.1  
7.4 6189.08  
7.41 6691.84  
7.42 6050.39  
7.43 5738.34

7.44 6102.4  
7.45 6033.06  
7.46 5721  
7.47 6379.78  
7.48 6501.14  
7.49 6327.78  
7.5 6137.08  
7.51 5738.34  
7.52 6154.41  
7.53 5634.32  
7.54 5911.7  
7.55 5911.7  
7.56 5894.37  
7.57 5998.38  
7.58 6119.74  
7.59 5981.05  
7.6 5512.97  
7.61 5981.05  
7.62 5755.67  
7.63 5686.33  
7.64 5963.71  
7.65 5981.05  
7.66 6033.06  
7.67 5478.29  
7.68 5339.6  
7.69 5512.97  
7.7 6293.1  
7.71 5773.01  
7.72 5738.34  
7.73 5981.05  
7.74 5894.37  
7.75 6327.78  
7.76 5599.65  
7.77 5166.24  
7.78 5963.71  
7.79 5877.03  
7.8 5981.05  
7.81 6033.06  
7.82 5668.99  
7.83 6189.08  
7.84 6293.1  
7.85 6154.41  
7.86 6154.41  
7.87 5929.04

|      |         |
|------|---------|
| 7.88 | 6535.81 |
| 7.89 | 5564.98 |
| 7.9  | 6397.12 |
| 7.91 | 5929.04 |
| 7.92 | 5426.28 |
| 7.93 | 6015.72 |
| 7.94 | 5651.66 |
| 7.95 | 5929.04 |
| 7.96 | 6293.1  |
| 7.97 | 6310.44 |
| 7.98 | 5877.03 |
| 7.99 | 5564.98 |
| 8    | 5825.02 |
| 8.01 | 5963.71 |
| 8.02 | 5512.97 |
| 8.03 | 5599.65 |
| 8.04 | 5755.67 |
| 8.05 | 5738.34 |
| 8.06 | 5183.57 |
| 8.07 | 5218.25 |
| 8.08 | 5981.05 |
| 8.09 | 5738.34 |
| 8.1  | 5929.04 |
| 8.11 | 5790.35 |
| 8.12 | 5825.02 |
| 8.13 | 5651.66 |
| 8.14 | 5460.96 |
| 8.15 | 5842.36 |
| 8.16 | 5773.01 |
| 8.17 | 5495.63 |
| 8.18 | 5963.71 |
| 8.19 | 5582.31 |
| 8.2  | 6154.41 |
| 8.21 | 5894.37 |
| 8.22 | 6067.73 |
| 8.23 | 5755.67 |
| 8.24 | 5807.68 |
| 8.25 | 5703.67 |
| 8.26 | 5339.6  |
| 8.27 | 5981.05 |
| 8.28 | 5963.71 |
| 8.29 | 5773.01 |
| 8.3  | 6085.07 |
| 8.31 | 5929.04 |

8.32 6119.74  
8.33 5946.38  
8.34 5582.31  
8.35 5963.71  
8.36 5651.66  
8.37 5825.02  
8.38 5929.04  
8.39 6085.07  
8.4 5842.36  
8.41 5998.38  
8.42 5478.29  
8.43 5911.7  
8.44 6033.06  
8.45 5703.67  
8.46 5530.3  
8.47 5686.33  
8.48 5166.24  
8.49 5564.98  
8.5 5339.6  
8.51 5651.66  
8.52 5304.93  
8.53 5634.32  
8.54 5929.04  
8.55 5668.99  
8.56 5374.27  
8.57 5564.98  
8.58 5634.32  
8.59 5755.67  
8.6 6015.72  
8.61 5408.95  
8.62 6033.06  
8.63 5564.98  
8.64 5790.35  
8.65 5703.67  
8.66 5721  
8.67 5408.95  
8.68 5304.93  
8.69 5148.9  
8.7 5599.65  
8.71 6085.07  
8.72 5634.32  
8.73 5807.68  
8.74 5131.57  
8.75 5235.58

8.76 5530.3  
8.77 5322.27  
8.78 5443.62  
8.79 4958.2  
8.8 5200.91  
8.81 5738.34  
8.82 5235.58  
8.83 5356.94  
8.84 5010.21  
8.85 5582.31  
8.86 5426.28  
8.87 5287.59  
8.88 5218.25  
8.89 5686.33  
8.9 5790.35  
8.91 5235.58  
8.92 5391.61  
8.93 5356.94  
8.94 5443.62  
8.95 5270.26  
8.96 5374.27  
8.97 5218.25  
8.98 5651.66  
8.99 5512.97  
9 5512.97  
9.01 5790.35  
9.02 6015.72  
9.03 5408.95  
9.04 5755.67  
9.05 5530.3  
9.06 5010.21  
9.07 5443.62  
9.08 5183.57  
9.09 5096.89  
9.1 4680.82  
9.11 5218.25  
9.12 5322.27  
9.13 5322.27  
9.14 5218.25  
9.15 5426.28  
9.16 5374.27  
9.17 4819.51  
9.18 5339.6  
9.19 5807.68

9.2 5235.58  
9.21 5564.98  
9.22 5408.95  
9.23 5235.58  
9.24 5114.23  
9.25 5929.04  
9.26 6067.73  
9.27 5252.92  
9.28 6015.72  
9.29 5634.32  
9.3 5668.99  
9.31 5426.28  
9.32 4906.19  
9.33 5443.62  
9.34 5200.91  
9.35 5287.59  
9.36 5564.98  
9.37 4854.18  
9.38 5391.61  
9.39 5356.94  
9.4 4715.49  
9.41 5426.28  
9.42 5773.01  
9.43 5495.63  
9.44 5564.98  
9.45 5010.21  
9.46 4940.87  
9.47 5408.95  
9.48 5426.28  
9.49 5270.26  
9.5 5218.25  
9.51 5564.98  
9.52 5027.55  
9.53 5512.97  
9.54 5235.58  
9.55 4940.87  
9.56 4923.53  
9.57 5044.88  
9.58 5183.57  
9.59 5218.25  
9.6 4854.18  
9.61 5166.24  
9.62 5270.26  
9.63 4871.52

|       |         |
|-------|---------|
| 9.64  | 5218.25 |
| 9.65  | 4819.51 |
| 9.66  | 5374.27 |
| 9.67  | 4663.48 |
| 9.68  | 5062.22 |
| 9.69  | 5062.22 |
| 9.7   | 4923.53 |
| 9.71  | 4802.17 |
| 9.72  | 5304.93 |
| 9.73  | 4819.51 |
| 9.74  | 5148.9  |
| 9.75  | 5252.92 |
| 9.76  | 4940.87 |
| 9.77  | 5114.23 |
| 9.78  | 4680.82 |
| 9.79  | 5218.25 |
| 9.8   | 5322.27 |
| 9.81  | 5582.31 |
| 9.82  | 5599.65 |
| 9.83  | 5096.89 |
| 9.84  | 5079.56 |
| 9.85  | 5322.27 |
| 9.86  | 4992.87 |
| 9.87  | 5235.58 |
| 9.88  | 5235.58 |
| 9.89  | 5062.22 |
| 9.9   | 5044.88 |
| 9.91  | 5079.56 |
| 9.92  | 5131.57 |
| 9.93  | 4784.84 |
| 9.94  | 4940.87 |
| 9.95  | 5010.21 |
| 9.96  | 4628.81 |
| 9.97  | 4438.11 |
| 9.98  | 4594.14 |
| 9.99  | 4403.44 |
| 10    | 5339.6  |
| 10.01 | 5044.88 |
| 10.02 | 5391.61 |
| 10.03 | 5218.25 |
| 10.04 | 5062.22 |
| 10.05 | 5079.56 |
| 10.06 | 4992.87 |
| 10.07 | 5096.89 |



|       |         |
|-------|---------|
| 10.08 | 4992.87 |
| 10.09 | 5512.97 |
| 10.1  | 4992.87 |
| 10.11 | 4767.5  |
| 10.12 | 5096.89 |
| 10.13 | 4247.41 |
| 10.14 | 5408.95 |
| 10.15 | 4888.86 |
| 10.16 | 5183.57 |
| 10.17 | 5183.57 |
| 10.18 | 5131.57 |
| 10.19 | 5044.88 |
| 10.2  | 4784.84 |
| 10.21 | 5374.27 |
| 10.22 | 5096.89 |
| 10.23 | 5010.21 |
| 10.24 | 4958.2  |
| 10.25 | 4750.17 |
| 10.26 | 4992.87 |
| 10.27 | 5114.23 |
| 10.28 | 5183.57 |
| 10.29 | 5235.58 |
| 10.3  | 4559.47 |
| 10.31 | 4888.86 |
| 10.32 | 4559.47 |
| 10.33 | 4490.12 |
| 10.34 | 4888.86 |
| 10.35 | 5010.21 |
| 10.36 | 5079.56 |
| 10.37 | 5304.93 |
| 10.38 | 4646.15 |
| 10.39 | 4178.07 |
| 10.4  | 4819.51 |
| 10.41 | 5010.21 |
| 10.42 | 4680.82 |
| 10.43 | 4472.78 |
| 10.44 | 5062.22 |
| 10.45 | 4923.53 |
| 10.46 | 4420.77 |
| 10.47 | 4715.49 |
| 10.48 | 4871.52 |
| 10.49 | 4455.45 |
| 10.5  | 4594.14 |
| 10.51 | 4854.18 |

|       |         |
|-------|---------|
| 10.52 | 4802.17 |
| 10.53 | 4906.19 |
| 10.54 | 5235.58 |
| 10.55 | 4230.07 |
| 10.56 | 4836.85 |
| 10.57 | 4680.82 |
| 10.58 | 4351.43 |
| 10.59 | 5010.21 |
| 10.6  | 4507.46 |
| 10.61 | 4871.52 |
| 10.62 | 4854.18 |
| 10.63 | 4663.48 |
| 10.64 | 4507.46 |
| 10.65 | 4992.87 |
| 10.66 | 5062.22 |
| 10.67 | 4732.83 |
| 10.68 | 4594.14 |
| 10.69 | 4004.7  |
| 10.7  | 4160.73 |
| 10.71 | 4490.12 |
| 10.72 | 4750.17 |
| 10.73 | 4455.45 |
| 10.74 | 4524.79 |
| 10.75 | 4472.78 |
| 10.76 | 4264.75 |
| 10.77 | 4507.46 |
| 10.78 | 4524.79 |
| 10.79 | 4594.14 |
| 10.8  | 4074.05 |
| 10.81 | 4022.04 |
| 10.82 | 4559.47 |
| 10.83 | 4264.75 |
| 10.84 | 4420.77 |
| 10.85 | 4195.4  |
| 10.86 | 4698.16 |
| 10.87 | 4940.87 |
| 10.88 | 4403.44 |
| 10.89 | 4836.85 |
| 10.9  | 4576.8  |
| 10.91 | 4056.71 |
| 10.92 | 4178.07 |
| 10.93 | 4507.46 |
| 10.94 | 4958.2  |
| 10.95 | 4594.14 |

|       |         |
|-------|---------|
| 10.96 | 5200.91 |
| 10.97 | 4594.14 |
| 10.98 | 4680.82 |
| 10.99 | 4368.77 |
| 11    | 4351.43 |
| 11.01 | 4386.1  |
| 11.02 | 4732.83 |
| 11.03 | 4490.12 |
| 11.04 | 4923.53 |
| 11.05 | 4750.17 |
| 11.06 | 4490.12 |
| 11.07 | 4126.06 |
| 11.08 | 4490.12 |
| 11.09 | 4490.12 |
| 11.1  | 4490.12 |
| 11.11 | 4507.46 |
| 11.12 | 4715.49 |
| 11.13 | 4576.8  |
| 11.14 | 4126.06 |
| 11.15 | 4022.04 |
| 11.16 | 4611.47 |
| 11.17 | 4680.82 |
| 11.18 | 4750.17 |
| 11.19 | 4490.12 |
| 11.2  | 4178.07 |
| 11.21 | 4126.06 |
| 11.22 | 4472.78 |
| 11.23 | 4403.44 |
| 11.24 | 4351.43 |
| 11.25 | 4195.4  |
| 11.26 | 4316.76 |
| 11.27 | 4524.79 |
| 11.28 | 4559.47 |
| 11.29 | 4680.82 |
| 11.3  | 4819.51 |
| 11.31 | 3987.37 |
| 11.32 | 4264.75 |
| 11.33 | 4351.43 |
| 11.34 | 4351.43 |
| 11.35 | 4351.43 |
| 11.36 | 4212.74 |
| 11.37 | 4282.08 |
| 11.38 | 4074.05 |
| 11.39 | 4472.78 |

11.4 4767.5  
11.41 4698.16  
11.42 4403.44  
11.43 4108.72  
11.44 4507.46  
11.45 4178.07  
11.46 4212.74  
11.47 3900.68  
11.48 4368.77  
11.49 3900.68  
11.5 4160.73  
11.51 4108.72  
11.52 4056.71  
11.53 4680.82  
11.54 4316.76  
11.55 4108.72  
11.56 4594.14  
11.57 4438.11  
11.58 4403.44  
11.59 4403.44  
11.6 4316.76  
11.61 4074.05  
11.62 4143.39  
11.63 4195.4  
11.64 4195.4  
11.65 4091.38  
11.66 4507.46  
11.67 4438.11  
11.68 3709.98  
11.69 4247.41  
11.7 4247.41  
11.71 4836.85  
11.72 4195.4  
11.73 4542.13  
11.74 4368.77  
11.75 4126.06  
11.76 4160.73  
11.77 4126.06  
11.78 4472.78  
11.79 4334.09  
11.8 3970.03  
11.81 3796.67  
11.82 4091.38  
11.83 4160.73

|       |         |
|-------|---------|
| 11.84 | 3970.03 |
| 11.85 | 4195.4  |
| 11.86 | 4039.37 |
| 11.87 | 4022.04 |
| 11.88 | 4368.77 |
| 11.89 | 4212.74 |
| 11.9  | 4334.09 |
| 11.91 | 4351.43 |
| 11.92 | 4559.47 |
| 11.93 | 4455.45 |
| 11.94 | 4126.06 |
| 11.95 | 4264.75 |
| 11.96 | 4906.19 |
| 11.97 | 3918.02 |
| 11.98 | 4074.05 |
| 11.99 | 4126.06 |
| 12    | 3900.68 |
| 12.01 | 3831.34 |
| 12.02 | 3866.01 |
| 12.03 | 4091.38 |
| 12.04 | 4351.43 |
| 12.05 | 4004.7  |
| 12.06 | 3900.68 |
| 12.07 | 3779.33 |
| 12.08 | 4368.77 |
| 12.09 | 4091.38 |
| 12.1  | 4039.37 |
| 12.11 | 4056.71 |
| 12.12 | 3866.01 |
| 12.13 | 4091.38 |
| 12.14 | 3744.66 |
| 12.15 | 4212.74 |
| 12.16 | 3883.35 |
| 12.17 | 3918.02 |
| 12.18 | 4022.04 |
| 12.19 | 4420.77 |
| 12.2  | 4524.79 |
| 12.21 | 3761.99 |
| 12.22 | 3640.64 |
| 12.23 | 4022.04 |
| 12.24 | 4039.37 |
| 12.25 | 4490.12 |
| 12.26 | 4282.08 |
| 12.27 | 3814    |

|       |         |
|-------|---------|
| 12.28 | 3866.01 |
| 12.29 | 3831.34 |
| 12.3  | 4455.45 |
| 12.31 | 3761.99 |
| 12.32 | 3900.68 |
| 12.33 | 3918.02 |
| 12.34 | 4195.4  |
| 12.35 | 3571.29 |
| 12.36 | 4143.39 |
| 12.37 | 3987.37 |
| 12.38 | 4490.12 |
| 12.39 | 4195.4  |
| 12.4  | 4334.09 |
| 12.41 | 3744.66 |
| 12.42 | 3657.97 |
| 12.43 | 3709.98 |
| 12.44 | 3987.37 |
| 12.45 | 4438.11 |
| 12.46 | 4126.06 |
| 12.47 | 4143.39 |
| 12.48 | 3900.68 |
| 12.49 | 4316.76 |
| 12.5  | 4108.72 |
| 12.51 | 4143.39 |
| 12.52 | 3900.68 |
| 12.53 | 4282.08 |
| 12.54 | 4108.72 |
| 12.55 | 4108.72 |
| 12.56 | 4039.37 |
| 12.57 | 3848.67 |
| 12.58 | 4282.08 |
| 12.59 | 4750.17 |
| 12.6  | 3883.35 |
| 12.61 | 3883.35 |
| 12.62 | 4108.72 |
| 12.63 | 3883.35 |
| 12.64 | 4351.43 |
| 12.65 | 3987.37 |
| 12.66 | 4143.39 |
| 12.67 | 4004.7  |
| 12.68 | 3883.35 |
| 12.69 | 4074.05 |
| 12.7  | 3935.36 |
| 12.71 | 3657.97 |

|       |         |
|-------|---------|
| 12.72 | 3866.01 |
| 12.73 | 4143.39 |
| 12.74 | 3970.03 |
| 12.75 | 4074.05 |
| 12.76 | 3935.36 |
| 12.77 | 4074.05 |
| 12.78 | 3709.98 |
| 12.79 | 4074.05 |
| 12.8  | 3900.68 |
| 12.81 | 3553.96 |
| 12.82 | 3761.99 |
| 12.83 | 3796.67 |
| 12.84 | 3415.26 |
| 12.85 | 3848.67 |
| 12.86 | 3432.6  |
| 12.87 | 4074.05 |
| 12.88 | 3987.37 |
| 12.89 | 4004.7  |
| 12.9  | 4091.38 |
| 12.91 | 3571.29 |
| 12.92 | 3900.68 |
| 12.93 | 3675.31 |
| 12.94 | 3952.69 |
| 12.95 | 4004.7  |
| 12.96 | 3484.61 |
| 12.97 | 3952.69 |
| 12.98 | 3709.98 |
| 12.99 | 3866.01 |
| 13    | 3744.66 |
| 13.01 | 3675.31 |
| 13.02 | 4212.74 |
| 13.03 | 3692.65 |
| 13.04 | 3657.97 |
| 13.05 | 3588.63 |
| 13.06 | 3761.99 |
| 13.07 | 4160.73 |
| 13.08 | 3657.97 |
| 13.09 | 3918.02 |
| 13.1  | 3657.97 |
| 13.11 | 3987.37 |
| 13.12 | 4212.74 |
| 13.13 | 3709.98 |
| 13.14 | 3605.97 |
| 13.15 | 3709.98 |

|       |         |
|-------|---------|
| 13.16 | 3605.97 |
| 13.17 | 3588.63 |
| 13.18 | 3657.97 |
| 13.19 | 3692.65 |
| 13.2  | 3952.69 |
| 13.21 | 3952.69 |
| 13.22 | 3744.66 |
| 13.23 | 4108.72 |
| 13.24 | 3779.33 |
| 13.25 | 3415.26 |
| 13.26 | 3345.92 |
| 13.27 | 3397.93 |
| 13.28 | 3952.69 |
| 13.29 | 3935.36 |
| 13.3  | 4126.06 |
| 13.31 | 3779.33 |
| 13.32 | 3918.02 |
| 13.33 | 3814    |
| 13.34 | 3224.56 |
| 13.35 | 3848.67 |
| 13.36 | 3761.99 |
| 13.37 | 3588.63 |
| 13.38 | 3779.33 |
| 13.39 | 3779.33 |
| 13.4  | 3883.35 |
| 13.41 | 3501.95 |
| 13.42 | 3623.3  |
| 13.43 | 3831.34 |
| 13.44 | 3935.36 |
| 13.45 | 3692.65 |
| 13.46 | 3935.36 |
| 13.47 | 2860.5  |
| 13.48 | 3259.24 |
| 13.49 | 3779.33 |
| 13.5  | 3709.98 |
| 13.51 | 3449.94 |
| 13.52 | 3744.66 |
| 13.53 | 3449.94 |
| 13.54 | 3692.65 |
| 13.55 | 3866.01 |
| 13.56 | 3571.29 |
| 13.57 | 3501.95 |
| 13.58 | 3519.28 |
| 13.59 | 3605.97 |



|       |         |
|-------|---------|
| 13.6  | 3744.66 |
| 13.61 | 3918.02 |
| 13.62 | 3553.96 |
| 13.63 | 3709.98 |
| 13.64 | 3536.62 |
| 13.65 | 3935.36 |
| 13.66 | 3970.03 |
| 13.67 | 3623.3  |
| 13.68 | 3501.95 |
| 13.69 | 3727.32 |
| 13.7  | 3761.99 |
| 13.71 | 3311.25 |
| 13.72 | 3432.6  |
| 13.73 | 3900.68 |
| 13.74 | 3814    |
| 13.75 | 3605.97 |
| 13.76 | 3623.3  |
| 13.77 | 3814    |
| 13.78 | 3831.34 |
| 13.79 | 3397.93 |
| 13.8  | 3605.97 |
| 13.81 | 3467.27 |
| 13.82 | 3363.26 |
| 13.83 | 3987.37 |
| 13.84 | 3311.25 |
| 13.85 | 3640.64 |
| 13.86 | 3675.31 |
| 13.87 | 3744.66 |
| 13.88 | 3432.6  |
| 13.89 | 3519.28 |
| 13.9  | 3779.33 |
| 13.91 | 3779.33 |
| 13.92 | 3588.63 |
| 13.93 | 3571.29 |
| 13.94 | 3727.32 |
| 13.95 | 3744.66 |
| 13.96 | 3970.03 |
| 13.97 | 3484.61 |
| 13.98 | 3432.6  |
| 13.99 | 4039.37 |
| 14    | 3640.64 |
| 14.01 | 3605.97 |
| 14.02 | 4056.71 |
| 14.03 | 3640.64 |

|       |         |
|-------|---------|
| 14.04 | 3657.97 |
| 14.05 | 3571.29 |
| 14.06 | 3761.99 |
| 14.07 | 3293.91 |
| 14.08 | 3675.31 |
| 14.09 | 3779.33 |
| 14.1  | 3536.62 |
| 14.11 | 3779.33 |
| 14.12 | 3172.56 |
| 14.13 | 3172.56 |
| 14.14 | 3796.67 |
| 14.15 | 3779.33 |
| 14.16 | 3553.96 |
| 14.17 | 3467.27 |
| 14.18 | 3588.63 |
| 14.19 | 3311.25 |
| 14.2  | 3467.27 |
| 14.21 | 3484.61 |
| 14.22 | 3640.64 |
| 14.23 | 3120.55 |
| 14.24 | 3692.65 |
| 14.25 | 3744.66 |
| 14.26 | 3397.93 |
| 14.27 | 3415.26 |
| 14.28 | 3224.56 |
| 14.29 | 3276.57 |
| 14.3  | 3293.91 |
| 14.31 | 3363.26 |
| 14.32 | 3241.9  |
| 14.33 | 3415.26 |
| 14.34 | 3501.95 |
| 14.35 | 3467.27 |
| 14.36 | 3501.95 |
| 14.37 | 3432.6  |
| 14.38 | 3640.64 |
| 14.39 | 3449.94 |
| 14.4  | 3259.24 |
| 14.41 | 3189.89 |
| 14.42 | 3519.28 |
| 14.43 | 3640.64 |
| 14.44 | 3120.55 |
| 14.45 | 3571.29 |
| 14.46 | 3276.57 |
| 14.47 | 3137.88 |

|       |         |
|-------|---------|
| 14.48 | 3345.92 |
| 14.49 | 3415.26 |
| 14.5  | 3605.97 |
| 14.51 | 3588.63 |
| 14.52 | 3328.58 |
| 14.53 | 3536.62 |
| 14.54 | 3779.33 |
| 14.55 | 2877.84 |
| 14.56 | 2843.16 |
| 14.57 | 3328.58 |
| 14.58 | 3311.25 |
| 14.59 | 3189.89 |
| 14.6  | 3051.2  |
| 14.61 | 3345.92 |
| 14.62 | 3380.59 |
| 14.63 | 2981.86 |
| 14.64 | 3831.34 |
| 14.65 | 3380.59 |
| 14.66 | 3380.59 |
| 14.67 | 3553.96 |
| 14.68 | 3293.91 |
| 14.69 | 3224.56 |
| 14.7  | 3449.94 |
| 14.71 | 3016.53 |
| 14.72 | 3467.27 |
| 14.73 | 3432.6  |
| 14.74 | 3501.95 |
| 14.75 | 3363.26 |
| 14.76 | 3276.57 |
| 14.77 | 3449.94 |
| 14.78 | 3935.36 |
| 14.79 | 3467.27 |
| 14.8  | 3571.29 |
| 14.81 | 3449.94 |
| 14.82 | 3328.58 |
| 14.83 | 3519.28 |
| 14.84 | 3137.88 |
| 14.85 | 3692.65 |
| 14.86 | 3241.9  |
| 14.87 | 3155.22 |
| 14.88 | 3137.88 |
| 14.89 | 3449.94 |
| 14.9  | 3553.96 |
| 14.91 | 3380.59 |

|       |         |
|-------|---------|
| 14.92 | 2999.19 |
| 14.93 | 3207.23 |
| 14.94 | 3259.24 |
| 14.95 | 3345.92 |
| 14.96 | 3588.63 |
| 14.97 | 3571.29 |
| 14.98 | 3623.3  |
| 14.99 | 3640.64 |
| 15    | 3467.27 |
| 15.01 | 3397.93 |
| 15.02 | 3519.28 |
| 15.03 | 3519.28 |
| 15.04 | 3449.94 |
| 15.05 | 3397.93 |
| 15.06 | 3051.2  |
| 15.07 | 3259.24 |
| 15.08 | 3415.26 |
| 15.09 | 3345.92 |
| 15.1  | 3259.24 |
| 15.11 | 3432.6  |
| 15.12 | 3241.9  |
| 15.13 | 3189.89 |
| 15.14 | 3467.27 |
| 15.15 | 2773.82 |
| 15.16 | 3207.23 |
| 15.17 | 3137.88 |
| 15.18 | 3900.68 |
| 15.19 | 3224.56 |
| 15.2  | 3293.91 |
| 15.21 | 4247.41 |
| 15.22 | 3328.58 |
| 15.23 | 3033.86 |
| 15.24 | 3016.53 |
| 15.25 | 3189.89 |
| 15.26 | 3224.56 |
| 15.27 | 3623.3  |
| 15.28 | 3484.61 |
| 15.29 | 3536.62 |
| 15.3  | 3259.24 |
| 15.31 | 3640.64 |
| 15.32 | 3397.93 |
| 15.33 | 3415.26 |
| 15.34 | 3779.33 |
| 15.35 | 2929.85 |

|       |         |
|-------|---------|
| 15.36 | 3276.57 |
| 15.37 | 3363.26 |
| 15.38 | 3155.22 |
| 15.39 | 3311.25 |
| 15.4  | 3068.54 |
| 15.41 | 2912.51 |
| 15.42 | 2964.52 |
| 15.43 | 3415.26 |
| 15.44 | 3241.9  |
| 15.45 | 3328.58 |
| 15.46 | 3432.6  |
| 15.47 | 2912.51 |
| 15.48 | 3276.57 |
| 15.49 | 3155.22 |
| 15.5  | 3068.54 |
| 15.51 | 3207.23 |
| 15.52 | 3259.24 |
| 15.53 | 3415.26 |
| 15.54 | 3397.93 |
| 15.55 | 3155.22 |
| 15.56 | 3328.58 |
| 15.57 | 3259.24 |
| 15.58 | 3553.96 |
| 15.59 | 2895.17 |
| 15.6  | 2860.5  |
| 15.61 | 3103.21 |
| 15.62 | 3172.56 |
| 15.63 | 3224.56 |
| 15.64 | 3449.94 |
| 15.65 | 3380.59 |
| 15.66 | 3103.21 |
| 15.67 | 2929.85 |
| 15.68 | 3016.53 |
| 15.69 | 3328.58 |
| 15.7  | 3328.58 |
| 15.71 | 3432.6  |
| 15.72 | 3189.89 |
| 15.73 | 2600.46 |
| 15.74 | 3345.92 |
| 15.75 | 3588.63 |
| 15.76 | 3120.55 |
| 15.77 | 3345.92 |
| 15.78 | 3120.55 |
| 15.79 | 3224.56 |

|       |         |
|-------|---------|
| 15.8  | 3224.56 |
| 15.81 | 3085.87 |
| 15.82 | 3033.86 |
| 15.83 | 2825.83 |
| 15.84 | 3415.26 |
| 15.85 | 3623.3  |
| 15.86 | 3380.59 |
| 15.87 | 3363.26 |
| 15.88 | 3172.56 |
| 15.89 | 3224.56 |
| 15.9  | 2877.84 |
| 15.91 | 2964.52 |
| 15.92 | 2895.17 |
| 15.93 | 3085.87 |
| 15.94 | 3363.26 |
| 15.95 | 3328.58 |
| 15.96 | 3241.9  |
| 15.97 | 3467.27 |
| 15.98 | 3415.26 |
| 15.99 | 2999.19 |
| 16    | 3051.2  |
| 16.01 | 3120.55 |
| 16.02 | 3276.57 |
| 16.03 | 3259.24 |
| 16.04 | 2964.52 |
| 16.05 | 3068.54 |
| 16.06 | 3155.22 |
| 16.07 | 3241.9  |
| 16.08 | 3103.21 |
| 16.09 | 2929.85 |
| 16.1  | 3224.56 |
| 16.11 | 2860.5  |
| 16.12 | 2912.51 |
| 16.13 | 3501.95 |
| 16.14 | 3501.95 |
| 16.15 | 2964.52 |
| 16.16 | 3224.56 |
| 16.17 | 3085.87 |
| 16.18 | 2895.17 |
| 16.19 | 2565.78 |
| 16.2  | 3189.89 |
| 16.21 | 3189.89 |
| 16.22 | 3103.21 |
| 16.23 | 3189.89 |

|       |         |
|-------|---------|
| 16.24 | 3259.24 |
| 16.25 | 3276.57 |
| 16.26 | 2981.86 |
| 16.27 | 3189.89 |
| 16.28 | 3085.87 |
| 16.29 | 3172.56 |
| 16.3  | 2999.19 |
| 16.31 | 3536.62 |
| 16.32 | 3120.55 |
| 16.33 | 3363.26 |
| 16.34 | 3189.89 |
| 16.35 | 3068.54 |
| 16.36 | 2669.8  |
| 16.37 | 3137.88 |
| 16.38 | 3120.55 |
| 16.39 | 3033.86 |
| 16.4  | 3016.53 |
| 16.41 | 3259.24 |
| 16.42 | 2964.52 |
| 16.43 | 3311.25 |
| 16.44 | 3449.94 |
| 16.45 | 3120.55 |
| 16.46 | 3155.22 |
| 16.47 | 2600.46 |
| 16.48 | 2773.82 |
| 16.49 | 3449.94 |
| 16.5  | 3380.59 |
| 16.51 | 2912.51 |
| 16.52 | 2773.82 |
| 16.53 | 3068.54 |
| 16.54 | 3415.26 |
| 16.55 | 3484.61 |
| 16.56 | 2739.15 |
| 16.57 | 2756.48 |
| 16.58 | 3155.22 |
| 16.59 | 3155.22 |
| 16.6  | 2964.52 |
| 16.61 | 3051.2  |
| 16.62 | 3051.2  |
| 16.63 | 3137.88 |
| 16.64 | 3224.56 |
| 16.65 | 3207.23 |
| 16.66 | 3172.56 |
| 16.67 | 3016.53 |

|       |         |
|-------|---------|
| 16.68 | 3085.87 |
| 16.69 | 3120.55 |
| 16.7  | 2825.83 |
| 16.71 | 2756.48 |
| 16.72 | 3103.21 |
| 16.73 | 2877.84 |
| 16.74 | 2704.47 |
| 16.75 | 3380.59 |
| 16.76 | 2981.86 |
| 16.77 | 3033.86 |
| 16.78 | 3016.53 |
| 16.79 | 2964.52 |
| 16.8  | 2791.16 |
| 16.81 | 3016.53 |
| 16.82 | 2843.16 |
| 16.83 | 2929.85 |
| 16.84 | 2999.19 |
| 16.85 | 3259.24 |
| 16.86 | 3016.53 |
| 16.87 | 2895.17 |
| 16.88 | 2704.47 |
| 16.89 | 3328.58 |
| 16.9  | 3033.86 |
| 16.91 | 3103.21 |
| 16.92 | 3120.55 |
| 16.93 | 3120.55 |
| 16.94 | 2756.48 |
| 16.95 | 2912.51 |
| 16.96 | 3120.55 |
| 16.97 | 3068.54 |
| 16.98 | 3120.55 |
| 16.99 | 3224.56 |
| 17    | 3085.87 |
| 17.01 | 3224.56 |
| 17.02 | 2773.82 |
| 17.03 | 2704.47 |
| 17.04 | 2860.5  |
| 17.05 | 3224.56 |
| 17.06 | 3051.2  |
| 17.07 | 2877.84 |
| 17.08 | 3137.88 |
| 17.09 | 2808.49 |
| 17.1  | 2652.46 |
| 17.11 | 3120.55 |



|       |         |
|-------|---------|
| 17.12 | 3068.54 |
| 17.13 | 3241.9  |
| 17.14 | 3432.6  |
| 17.15 | 3241.9  |
| 17.16 | 2461.76 |
| 17.17 | 2912.51 |
| 17.18 | 2669.8  |
| 17.19 | 2808.49 |
| 17.2  | 3016.53 |
| 17.21 | 3432.6  |
| 17.22 | 3432.6  |
| 17.23 | 3085.87 |
| 17.24 | 2912.51 |
| 17.25 | 3051.2  |
| 17.26 | 3293.91 |
| 17.27 | 3085.87 |
| 17.28 | 2756.48 |
| 17.29 | 2895.17 |
| 17.3  | 2721.81 |
| 17.31 | 3172.56 |
| 17.32 | 2531.11 |
| 17.33 | 2444.43 |
| 17.34 | 3293.91 |
| 17.35 | 2999.19 |
| 17.36 | 2825.83 |
| 17.37 | 2929.85 |
| 17.38 | 2721.81 |
| 17.39 | 2947.18 |
| 17.4  | 3016.53 |
| 17.41 | 2635.13 |
| 17.42 | 2669.8  |
| 17.43 | 2739.15 |
| 17.44 | 2825.83 |
| 17.45 | 3085.87 |
| 17.46 | 3016.53 |
| 17.47 | 2739.15 |
| 17.48 | 2877.84 |
| 17.49 | 3120.55 |
| 17.5  | 2669.8  |
| 17.51 | 3120.55 |
| 17.52 | 2912.51 |
| 17.53 | 3033.86 |
| 17.54 | 2860.5  |
| 17.55 | 2860.5  |

|       |         |
|-------|---------|
| 17.56 | 2548.45 |
| 17.57 | 2791.16 |
| 17.58 | 2843.16 |
| 17.59 | 2652.46 |
| 17.6  | 2600.46 |
| 17.61 | 2704.47 |
| 17.62 | 2739.15 |
| 17.63 | 2687.14 |
| 17.64 | 2565.78 |
| 17.65 | 2565.78 |
| 17.66 | 3120.55 |
| 17.67 | 2739.15 |
| 17.68 | 2739.15 |
| 17.69 | 2721.81 |
| 17.7  | 2548.45 |
| 17.71 | 2773.82 |
| 17.72 | 2739.15 |
| 17.73 | 2409.76 |
| 17.74 | 2756.48 |
| 17.75 | 2860.5  |
| 17.76 | 2479.1  |
| 17.77 | 2652.46 |
| 17.78 | 2652.46 |
| 17.79 | 2531.11 |
| 17.8  | 2773.82 |
| 17.81 | 3380.59 |
| 17.82 | 2704.47 |
| 17.83 | 2496.44 |
| 17.84 | 2531.11 |
| 17.85 | 2687.14 |
| 17.86 | 2548.45 |
| 17.87 | 3172.56 |
| 17.88 | 2964.52 |
| 17.89 | 2721.81 |
| 17.9  | 2652.46 |
| 17.91 | 2427.09 |
| 17.92 | 2635.13 |
| 17.93 | 2409.76 |
| 17.94 | 2669.8  |
| 17.95 | 2617.79 |
| 17.96 | 2773.82 |
| 17.97 | 2687.14 |
| 17.98 | 2479.1  |
| 17.99 | 2617.79 |

|       |         |
|-------|---------|
| 18    | 2721.81 |
| 18.01 | 2912.51 |
| 18.02 | 2496.44 |
| 18.03 | 2548.45 |
| 18.04 | 2877.84 |
| 18.05 | 2617.79 |
| 18.06 | 2617.79 |
| 18.07 | 2825.83 |
| 18.08 | 2444.43 |
| 18.09 | 2513.77 |
| 18.1  | 2877.84 |
| 18.11 | 2565.78 |
| 18.12 | 2791.16 |
| 18.13 | 2427.09 |
| 18.14 | 2877.84 |
| 18.15 | 2947.18 |
| 18.16 | 2687.14 |
| 18.17 | 2791.16 |
| 18.18 | 2513.77 |
| 18.19 | 2548.45 |
| 18.2  | 2825.83 |
| 18.21 | 2773.82 |
| 18.22 | 2496.44 |
| 18.23 | 2496.44 |
| 18.24 | 2583.12 |
| 18.25 | 2392.42 |
| 18.26 | 2513.77 |
| 18.27 | 2877.84 |
| 18.28 | 2843.16 |
| 18.29 | 2721.81 |
| 18.3  | 2756.48 |
| 18.31 | 2635.13 |
| 18.32 | 2583.12 |
| 18.33 | 2773.82 |
| 18.34 | 2652.46 |
| 18.35 | 2444.43 |
| 18.36 | 2877.84 |
| 18.37 | 2513.77 |
| 18.38 | 2513.77 |
| 18.39 | 2791.16 |
| 18.4  | 2357.75 |
| 18.41 | 2409.76 |
| 18.42 | 2843.16 |
| 18.43 | 2739.15 |

|       |         |
|-------|---------|
| 18.44 | 2739.15 |
| 18.45 | 2739.15 |
| 18.46 | 2496.44 |
| 18.47 | 2583.12 |
| 18.48 | 2565.78 |
| 18.49 | 2600.46 |
| 18.5  | 2704.47 |
| 18.51 | 2739.15 |
| 18.52 | 2305.74 |
| 18.53 | 2687.14 |
| 18.54 | 2583.12 |
| 18.55 | 2600.46 |
| 18.56 | 2791.16 |
| 18.57 | 2427.09 |
| 18.58 | 2773.82 |
| 18.59 | 2271.06 |
| 18.6  | 2461.76 |
| 18.61 | 2617.79 |
| 18.62 | 2808.49 |
| 18.63 | 2617.79 |
| 18.64 | 2617.79 |
| 18.65 | 2444.43 |
| 18.66 | 2513.77 |
| 18.67 | 2444.43 |
| 18.68 | 2825.83 |
| 18.69 | 2652.46 |
| 18.7  | 2253.73 |
| 18.71 | 2565.78 |
| 18.72 | 2513.77 |
| 18.73 | 2340.41 |
| 18.74 | 2097.7  |
| 18.75 | 2860.5  |
| 18.76 | 2721.81 |
| 18.77 | 2253.73 |
| 18.78 | 2444.43 |
| 18.79 | 2548.45 |
| 18.8  | 2929.85 |
| 18.81 | 2427.09 |
| 18.82 | 2791.16 |
| 18.83 | 2669.8  |
| 18.84 | 2773.82 |
| 18.85 | 2617.79 |
| 18.86 | 2739.15 |
| 18.87 | 2791.16 |

|       |         |
|-------|---------|
| 18.88 | 2565.78 |
| 18.89 | 2548.45 |
| 18.9  | 2531.11 |
| 18.91 | 2444.43 |
| 18.92 | 2808.49 |
| 18.93 | 2392.42 |
| 18.94 | 2444.43 |
| 18.95 | 2635.13 |
| 18.96 | 2825.83 |
| 18.97 | 2739.15 |
| 18.98 | 2323.07 |
| 18.99 | 2479.1  |
| 19    | 2687.14 |
| 19.01 | 2479.1  |
| 19.02 | 2583.12 |
| 19.03 | 2652.46 |
| 19.04 | 2669.8  |
| 19.05 | 2739.15 |
| 19.06 | 2496.44 |
| 19.07 | 2565.78 |
| 19.08 | 2825.83 |
| 19.09 | 2635.13 |
| 19.1  | 2617.79 |
| 19.11 | 2860.5  |
| 19.12 | 2565.78 |
| 19.13 | 2583.12 |
| 19.14 | 3207.23 |
| 19.15 | 2773.82 |
| 19.16 | 2600.46 |
| 19.17 | 2721.81 |
| 19.18 | 2496.44 |
| 19.19 | 2565.78 |
| 19.2  | 2340.41 |
| 19.21 | 2427.09 |
| 19.22 | 2548.45 |
| 19.23 | 2912.51 |
| 19.24 | 2340.41 |
| 19.25 | 2565.78 |
| 19.26 | 2375.08 |
| 19.27 | 2721.81 |
| 19.28 | 2340.41 |
| 19.29 | 2617.79 |
| 19.3  | 2375.08 |
| 19.31 | 2687.14 |

|       |         |
|-------|---------|
| 19.32 | 2479.1  |
| 19.33 | 2461.76 |
| 19.34 | 2600.46 |
| 19.35 | 2687.14 |
| 19.36 | 2167.05 |
| 19.37 | 2513.77 |
| 19.38 | 2288.4  |
| 19.39 | 2149.71 |
| 19.4  | 2340.41 |
| 19.41 | 2479.1  |
| 19.42 | 2357.75 |
| 19.43 | 2253.73 |
| 19.44 | 2496.44 |
| 19.45 | 2340.41 |
| 19.46 | 2271.06 |
| 19.47 | 2271.06 |
| 19.48 | 2444.43 |
| 19.49 | 2288.4  |
| 19.5  | 2548.45 |
| 19.51 | 2531.11 |
| 19.52 | 2531.11 |
| 19.53 | 2184.38 |
| 19.54 | 2531.11 |
| 19.55 | 2461.76 |
| 19.56 | 2565.78 |
| 19.57 | 2548.45 |
| 19.58 | 2600.46 |
| 19.59 | 2756.48 |
| 19.6  | 2409.76 |
| 19.61 | 2583.12 |
| 19.62 | 2600.46 |
| 19.63 | 2565.78 |
| 19.64 | 2323.07 |
| 19.65 | 2548.45 |
| 19.66 | 2219.06 |
| 19.67 | 2184.38 |
| 19.68 | 2167.05 |
| 19.69 | 2496.44 |
| 19.7  | 2583.12 |
| 19.71 | 2479.1  |
| 19.72 | 2427.09 |
| 19.73 | 2375.08 |
| 19.74 | 2323.07 |
| 19.75 | 2392.42 |

|       |         |
|-------|---------|
| 19.76 | 2236.39 |
| 19.77 | 2617.79 |
| 19.78 | 2600.46 |
| 19.79 | 2583.12 |
| 19.8  | 2531.11 |
| 19.81 | 2583.12 |
| 19.82 | 2513.77 |
| 19.83 | 2479.1  |
| 19.84 | 2236.39 |
| 19.85 | 2357.75 |
| 19.86 | 2288.4  |
| 19.87 | 2375.08 |
| 19.88 | 2600.46 |
| 19.89 | 2444.43 |
| 19.9  | 2756.48 |
| 19.91 | 2271.06 |
| 19.92 | 2271.06 |
| 19.93 | 2253.73 |
| 19.94 | 2305.74 |
| 19.95 | 2132.37 |
| 19.96 | 2323.07 |
| 19.97 | 2444.43 |
| 19.98 | 2947.18 |
| 19.99 | 2687.14 |
| 20    | 2288.4  |
| 20.01 | 2583.12 |
| 20.02 | 2444.43 |
| 20.03 | 2219.06 |
| 20.04 | 2219.06 |
| 20.05 | 2253.73 |
| 20.06 | 2132.37 |
| 20.07 | 2201.72 |
| 20.08 | 2739.15 |
| 20.09 | 2513.77 |
| 20.1  | 2340.41 |
| 20.11 | 2375.08 |
| 20.12 | 2340.41 |
| 20.13 | 2479.1  |
| 20.14 | 2392.42 |
| 20.15 | 2600.46 |
| 20.16 | 2409.76 |
| 20.17 | 2600.46 |
| 20.18 | 2721.81 |
| 20.19 | 2669.8  |

|       |         |
|-------|---------|
| 20.2  | 2808.49 |
| 20.21 | 2461.76 |
| 20.22 | 2583.12 |
| 20.23 | 2635.13 |
| 20.24 | 3016.53 |
| 20.25 | 2617.79 |
| 20.26 | 2583.12 |
| 20.27 | 2808.49 |
| 20.28 | 2773.82 |
| 20.29 | 2409.76 |
| 20.3  | 2392.42 |
| 20.31 | 2981.86 |
| 20.32 | 2773.82 |
| 20.33 | 2895.17 |
| 20.34 | 2513.77 |
| 20.35 | 2704.47 |
| 20.36 | 3103.21 |
| 20.37 | 2981.86 |
| 20.38 | 2583.12 |
| 20.39 | 2877.84 |
| 20.4  | 2947.18 |
| 20.41 | 2652.46 |
| 20.42 | 2721.81 |
| 20.43 | 2617.79 |
| 20.44 | 2912.51 |
| 20.45 | 2617.79 |
| 20.46 | 2028.36 |
| 20.47 | 2479.1  |
| 20.48 | 2513.77 |
| 20.49 | 2600.46 |
| 20.5  | 2357.75 |
| 20.51 | 2600.46 |
| 20.52 | 2271.06 |
| 20.53 | 2305.74 |
| 20.54 | 2375.08 |
| 20.55 | 2305.74 |
| 20.56 | 2323.07 |
| 20.57 | 2479.1  |
| 20.58 | 2496.44 |
| 20.59 | 2687.14 |
| 20.6  | 2548.45 |
| 20.61 | 2305.74 |
| 20.62 | 2652.46 |
| 20.63 | 2635.13 |



|       |         |
|-------|---------|
| 20.64 | 2461.76 |
| 20.65 | 2496.44 |
| 20.66 | 2513.77 |
| 20.67 | 2461.76 |
| 20.68 | 2115.04 |
| 20.69 | 2219.06 |
| 20.7  | 2357.75 |
| 20.71 | 2288.4  |
| 20.72 | 2496.44 |
| 20.73 | 2253.73 |
| 20.74 | 2548.45 |
| 20.75 | 2271.06 |
| 20.76 | 2236.39 |
| 20.77 | 2305.74 |
| 20.78 | 2652.46 |
| 20.79 | 2427.09 |
| 20.8  | 2340.41 |
| 20.81 | 2461.76 |
| 20.82 | 2635.13 |
| 20.83 | 2236.39 |
| 20.84 | 2444.43 |
| 20.85 | 2843.16 |
| 20.86 | 2635.13 |
| 20.87 | 2704.47 |
| 20.88 | 2479.1  |
| 20.89 | 2721.81 |
| 20.9  | 2288.4  |
| 20.91 | 2444.43 |
| 20.92 | 2583.12 |
| 20.93 | 2375.08 |
| 20.94 | 2219.06 |
| 20.95 | 2357.75 |
| 20.96 | 2184.38 |
| 20.97 | 2479.1  |
| 20.98 | 2773.82 |
| 20.99 | 2219.06 |
| 21    | 2271.06 |
| 21.01 | 2531.11 |
| 21.02 | 2652.46 |
| 21.03 | 2184.38 |
| 21.04 | 2531.11 |
| 21.05 | 2149.71 |
| 21.06 | 2479.1  |
| 21.07 | 2288.4  |

|       |         |
|-------|---------|
| 21.08 | 2427.09 |
| 21.09 | 2496.44 |
| 21.1  | 2340.41 |
| 21.11 | 2219.06 |
| 21.12 | 2097.7  |
| 21.13 | 2011.02 |
| 21.14 | 2219.06 |
| 21.15 | 2115.04 |
| 21.16 | 2271.06 |
| 21.17 | 2444.43 |
| 21.18 | 2375.08 |
| 21.19 | 2097.7  |
| 21.2  | 2288.4  |
| 21.21 | 2912.51 |
| 21.22 | 2444.43 |
| 21.23 | 2201.72 |
| 21.24 | 2375.08 |
| 21.25 | 2271.06 |
| 21.26 | 2271.06 |
| 21.27 | 2236.39 |
| 21.28 | 2444.43 |
| 21.29 | 2357.75 |
| 21.3  | 2739.15 |
| 21.31 | 2496.44 |
| 21.32 | 2409.76 |
| 21.33 | 2219.06 |
| 21.34 | 2184.38 |
| 21.35 | 2652.46 |
| 21.36 | 2288.4  |
| 21.37 | 2115.04 |
| 21.38 | 2548.45 |
| 21.39 | 2219.06 |
| 21.4  | 2427.09 |
| 21.41 | 2063.03 |
| 21.42 | 2063.03 |
| 21.43 | 2167.05 |
| 21.44 | 2652.46 |
| 21.45 | 2392.42 |
| 21.46 | 1959.01 |
| 21.47 | 2357.75 |
| 21.48 | 2461.76 |
| 21.49 | 2652.46 |
| 21.5  | 2375.08 |
| 21.51 | 2253.73 |

|       |         |
|-------|---------|
| 21.52 | 2756.48 |
| 21.53 | 2288.4  |
| 21.54 | 2132.37 |
| 21.55 | 2375.08 |
| 21.56 | 2132.37 |
| 21.57 | 1889.66 |
| 21.58 | 2080.36 |
| 21.59 | 2427.09 |
| 21.6  | 2288.4  |
| 21.61 | 2115.04 |
| 21.62 | 2253.73 |
| 21.63 | 2132.37 |
| 21.64 | 2288.4  |
| 21.65 | 2496.44 |
| 21.66 | 2340.41 |
| 21.67 | 2132.37 |
| 21.68 | 2340.41 |
| 21.69 | 2444.43 |
| 21.7  | 2323.07 |
| 21.71 | 2115.04 |
| 21.72 | 2305.74 |
| 21.73 | 2323.07 |
| 21.74 | 2253.73 |
| 21.75 | 2045.69 |
| 21.76 | 2461.76 |
| 21.77 | 2011.02 |
| 21.78 | 2496.44 |
| 21.79 | 2409.76 |
| 21.8  | 2340.41 |
| 21.81 | 2236.39 |
| 21.82 | 2045.69 |
| 21.83 | 2236.39 |
| 21.84 | 2357.75 |
| 21.85 | 2444.43 |
| 21.86 | 2461.76 |
| 21.87 | 2045.69 |
| 21.88 | 2115.04 |
| 21.89 | 2167.05 |
| 21.9  | 2045.69 |
| 21.91 | 2063.03 |
| 21.92 | 2184.38 |
| 21.93 | 2253.73 |
| 21.94 | 2357.75 |
| 21.95 | 2097.7  |

|       |         |
|-------|---------|
| 21.96 | 2444.43 |
| 21.97 | 2184.38 |
| 21.98 | 2236.39 |
| 21.99 | 2080.36 |
| 22    | 2479.1  |
| 22.01 | 2461.76 |
| 22.02 | 2305.74 |
| 22.03 | 2479.1  |
| 22.04 | 2288.4  |
| 22.05 | 2011.02 |
| 22.06 | 2357.75 |
| 22.07 | 2357.75 |
| 22.08 | 2028.36 |
| 22.09 | 2115.04 |
| 22.1  | 2167.05 |
| 22.11 | 2461.76 |
| 22.12 | 2323.07 |
| 22.13 | 2409.76 |
| 22.14 | 2253.73 |
| 22.15 | 1976.35 |
| 22.16 | 2063.03 |
| 22.17 | 2427.09 |
| 22.18 | 2323.07 |
| 22.19 | 2427.09 |
| 22.2  | 2097.7  |
| 22.21 | 2253.73 |
| 22.22 | 2479.1  |
| 22.23 | 2531.11 |
| 22.24 | 2392.42 |
| 22.25 | 2409.76 |
| 22.26 | 2531.11 |
| 22.27 | 2479.1  |
| 22.28 | 2496.44 |
| 22.29 | 2565.78 |
| 22.3  | 2479.1  |
| 22.31 | 2652.46 |
| 22.32 | 2427.09 |
| 22.33 | 2323.07 |
| 22.34 | 2548.45 |
| 22.35 | 2496.44 |
| 22.36 | 2236.39 |
| 22.37 | 2288.4  |
| 22.38 | 2791.16 |
| 22.39 | 2496.44 |

|       |         |
|-------|---------|
| 22.4  | 2357.75 |
| 22.41 | 2011.02 |
| 22.42 | 2375.08 |
| 22.43 | 2132.37 |
| 22.44 | 2427.09 |
| 22.45 | 2513.77 |
| 22.46 | 2652.46 |
| 22.47 | 2063.03 |
| 22.48 | 2617.79 |
| 22.49 | 2531.11 |
| 22.5  | 2513.77 |
| 22.51 | 2531.11 |
| 22.52 | 2219.06 |
| 22.53 | 2444.43 |
| 22.54 | 2132.37 |
| 22.55 | 2253.73 |
| 22.56 | 2427.09 |
| 22.57 | 2513.77 |
| 22.58 | 2271.06 |
| 22.59 | 2704.47 |
| 22.6  | 2340.41 |
| 22.61 | 2600.46 |
| 22.62 | 2357.75 |
| 22.63 | 2583.12 |
| 22.64 | 2600.46 |
| 22.65 | 2513.77 |
| 22.66 | 2444.43 |
| 22.67 | 2565.78 |
| 22.68 | 2461.76 |
| 22.69 | 2513.77 |
| 22.7  | 2392.42 |
| 22.71 | 2357.75 |
| 22.72 | 2167.05 |
| 22.73 | 2600.46 |
| 22.74 | 2513.77 |
| 22.75 | 2721.81 |
| 22.76 | 2947.18 |
| 22.77 | 2791.16 |
| 22.78 | 2756.48 |
| 22.79 | 2808.49 |
| 22.8  | 2843.16 |
| 22.81 | 2895.17 |
| 22.82 | 2721.81 |
| 22.83 | 3016.53 |

|       |         |
|-------|---------|
| 22.84 | 2808.49 |
| 22.85 | 3068.54 |
| 22.86 | 3224.56 |
| 22.87 | 3016.53 |
| 22.88 | 3085.87 |
| 22.89 | 3189.89 |
| 22.9  | 3276.57 |
| 22.91 | 4056.71 |
| 22.92 | 3605.97 |
| 22.93 | 3918.02 |
| 22.94 | 4316.76 |
| 22.95 | 4299.42 |
| 22.96 | 4836.85 |
| 22.97 | 5478.29 |
| 22.98 | 5495.63 |
| 22.99 | 5547.64 |
| 23    | 5998.38 |
| 23.01 | 6345.11 |
| 23.02 | 7107.91 |
| 23.03 | 8633.51 |
| 23.04 | 8668.19 |
| 23.05 | 9795.05 |
| 23.06 | 10332.5 |
| 23.07 | 10852.6 |
| 23.08 | 12031.4 |
| 23.09 | 14545.2 |
| 23.1  | 15377.4 |
| 23.11 | 16469.6 |
| 23.12 | 17267   |
| 23.13 | 19694.1 |
| 23.14 | 19503.4 |
| 23.15 | 21583.8 |
| 23.16 | 20023.5 |
| 23.17 | 20370.2 |
| 23.18 | 19364.7 |
| 23.19 | 16226.8 |
| 23.2  | 15620.1 |
| 23.21 | 13747.7 |
| 23.22 | 12014.1 |
| 23.23 | 10627.2 |
| 23.24 | 9500.33 |
| 23.25 | 7419.97 |
| 23.26 | 6449.13 |
| 23.27 | 5825.02 |

|       |         |
|-------|---------|
| 23.28 | 4940.87 |
| 23.29 | 4750.17 |
| 23.3  | 4420.77 |
| 23.31 | 3952.69 |
| 23.32 | 3987.37 |
| 23.33 | 3536.62 |
| 23.34 | 3189.89 |
| 23.35 | 3172.56 |
| 23.36 | 2808.49 |
| 23.37 | 3172.56 |
| 23.38 | 2877.84 |
| 23.39 | 3224.56 |
| 23.4  | 2825.83 |
| 23.41 | 2999.19 |
| 23.42 | 2912.51 |
| 23.43 | 2479.1  |
| 23.44 | 2375.08 |
| 23.45 | 2461.76 |
| 23.46 | 2756.48 |
| 23.47 | 2756.48 |
| 23.48 | 2461.76 |
| 23.49 | 2583.12 |
| 23.5  | 2687.14 |
| 23.51 | 2444.43 |
| 23.52 | 2617.79 |
| 23.53 | 2253.73 |
| 23.54 | 2340.41 |
| 23.55 | 2531.11 |
| 23.56 | 2184.38 |
| 23.57 | 2305.74 |
| 23.58 | 2531.11 |
| 23.59 | 2045.69 |
| 23.6  | 2600.46 |
| 23.61 | 2392.42 |
| 23.62 | 2600.46 |
| 23.63 | 2184.38 |
| 23.64 | 2357.75 |
| 23.65 | 2253.73 |
| 23.66 | 2357.75 |
| 23.67 | 2583.12 |
| 23.68 | 2409.76 |
| 23.69 | 2340.41 |
| 23.7  | 2583.12 |
| 23.71 | 2288.4  |

|       |         |
|-------|---------|
| 23.72 | 2167.05 |
| 23.73 | 2565.78 |
| 23.74 | 2167.05 |
| 23.75 | 2219.06 |
| 23.76 | 2409.76 |
| 23.77 | 2305.74 |
| 23.78 | 2340.41 |
| 23.79 | 2184.38 |
| 23.8  | 2045.69 |
| 23.81 | 2201.72 |
| 23.82 | 2323.07 |
| 23.83 | 2305.74 |
| 23.84 | 2167.05 |
| 23.85 | 2496.44 |
| 23.86 | 2028.36 |
| 23.87 | 2669.8  |
| 23.88 | 2063.03 |
| 23.89 | 2115.04 |
| 23.9  | 2271.06 |
| 23.91 | 2201.72 |
| 23.92 | 2444.43 |
| 23.93 | 2340.41 |
| 23.94 | 2357.75 |
| 23.95 | 2271.06 |
| 23.96 | 2063.03 |
| 23.97 | 2496.44 |
| 23.98 | 2132.37 |
| 23.99 | 2288.4  |
| 24    | 2340.41 |
| 24.01 | 2323.07 |
| 24.02 | 2288.4  |
| 24.03 | 2479.1  |
| 24.04 | 2149.71 |
| 24.05 | 2617.79 |
| 24.06 | 2496.44 |
| 24.07 | 2444.43 |
| 24.08 | 2149.71 |
| 24.09 | 2028.36 |
| 24.1  | 1976.35 |
| 24.11 | 2375.08 |
| 24.12 | 2236.39 |
| 24.13 | 2357.75 |
| 24.14 | 2271.06 |
| 24.15 | 2271.06 |



|       |         |
|-------|---------|
| 24.16 | 2115.04 |
| 24.17 | 2340.41 |
| 24.18 | 2427.09 |
| 24.19 | 2357.75 |
| 24.2  | 1959.01 |
| 24.21 | 2357.75 |
| 24.22 | 2288.4  |
| 24.23 | 2080.36 |
| 24.24 | 2271.06 |
| 24.25 | 2427.09 |
| 24.26 | 1924.34 |
| 24.27 | 1941.67 |
| 24.28 | 1941.67 |
| 24.29 | 1802.98 |
| 24.3  | 2028.36 |
| 24.31 | 2305.74 |
| 24.32 | 2271.06 |
| 24.33 | 2271.06 |
| 24.34 | 2531.11 |
| 24.35 | 2219.06 |
| 24.36 | 2011.02 |
| 24.37 | 2323.07 |
| 24.38 | 2149.71 |
| 24.39 | 2687.14 |
| 24.4  | 2253.73 |
| 24.41 | 2236.39 |
| 24.42 | 2340.41 |
| 24.43 | 2149.71 |
| 24.44 | 2063.03 |
| 24.45 | 2340.41 |
| 24.46 | 2357.75 |
| 24.47 | 2444.43 |
| 24.48 | 2496.44 |
| 24.49 | 2496.44 |
| 24.5  | 2427.09 |
| 24.51 | 2184.38 |
| 24.52 | 1820.32 |
| 24.53 | 2323.07 |
| 24.54 | 2167.05 |
| 24.55 | 2167.05 |
| 24.56 | 2201.72 |
| 24.57 | 2305.74 |
| 24.58 | 2531.11 |
| 24.59 | 2479.1  |

|       |         |
|-------|---------|
| 24.6  | 2132.37 |
| 24.61 | 2323.07 |
| 24.62 | 2063.03 |
| 24.63 | 2305.74 |
| 24.64 | 2115.04 |
| 24.65 | 1854.99 |
| 24.66 | 2201.72 |
| 24.67 | 1993.68 |
| 24.68 | 2236.39 |
| 24.69 | 1976.35 |
| 24.7  | 2115.04 |
| 24.71 | 2479.1  |
| 24.72 | 1907    |
| 24.73 | 2115.04 |
| 24.74 | 2063.03 |
| 24.75 | 2184.38 |
| 24.76 | 2288.4  |
| 24.77 | 2167.05 |
| 24.78 | 2357.75 |
| 24.79 | 2097.7  |
| 24.8  | 2184.38 |
| 24.81 | 2149.71 |
| 24.82 | 2305.74 |
| 24.83 | 2219.06 |
| 24.84 | 1924.34 |
| 24.85 | 2565.78 |
| 24.86 | 2461.76 |
| 24.87 | 2340.41 |
| 24.88 | 2253.73 |
| 24.89 | 1993.68 |
| 24.9  | 2375.08 |
| 24.91 | 2461.76 |
| 24.92 | 2097.7  |
| 24.93 | 2063.03 |
| 24.94 | 2461.76 |
| 24.95 | 2288.4  |
| 24.96 | 2479.1  |
| 24.97 | 2271.06 |
| 24.98 | 2340.41 |
| 24.99 | 1959.01 |
| 25    | 1959.01 |
| 25.01 | 2444.43 |
| 25.02 | 2219.06 |
| 25.03 | 2045.69 |

|       |         |
|-------|---------|
| 25.04 | 2375.08 |
| 25.05 | 2409.76 |
| 25.06 | 2271.06 |
| 25.07 | 2600.46 |
| 25.08 | 2149.71 |
| 25.09 | 2011.02 |
| 25.1  | 2288.4  |
| 25.11 | 2652.46 |
| 25.12 | 1993.68 |
| 25.13 | 2167.05 |
| 25.14 | 2132.37 |
| 25.15 | 2132.37 |
| 25.16 | 2011.02 |
| 25.17 | 2236.39 |
| 25.18 | 2461.76 |
| 25.19 | 2323.07 |
| 25.2  | 1976.35 |
| 25.21 | 2080.36 |
| 25.22 | 1976.35 |
| 25.23 | 2115.04 |
| 25.24 | 2063.03 |
| 25.25 | 2115.04 |
| 25.26 | 2271.06 |
| 25.27 | 2305.74 |
| 25.28 | 2496.44 |
| 25.29 | 2427.09 |
| 25.3  | 2409.76 |
| 25.31 | 2375.08 |
| 25.32 | 2375.08 |
| 25.33 | 2253.73 |
| 25.34 | 2531.11 |
| 25.35 | 2236.39 |
| 25.36 | 2635.13 |
| 25.37 | 2288.4  |
| 25.38 | 2288.4  |
| 25.39 | 2531.11 |
| 25.4  | 2427.09 |
| 25.41 | 2063.03 |
| 25.42 | 2357.75 |
| 25.43 | 1959.01 |
| 25.44 | 2149.71 |
| 25.45 | 2132.37 |
| 25.46 | 2392.42 |
| 25.47 | 2097.7  |

|       |         |
|-------|---------|
| 25.48 | 1785.65 |
| 25.49 | 2132.37 |
| 25.5  | 1889.66 |
| 25.51 | 2461.76 |
| 25.52 | 2063.03 |
| 25.53 | 2409.76 |
| 25.54 | 2167.05 |
| 25.55 | 2323.07 |
| 25.56 | 2115.04 |
| 25.57 | 2253.73 |
| 25.58 | 2201.72 |
| 25.59 | 2461.76 |
| 25.6  | 2271.06 |
| 25.61 | 2184.38 |
| 25.62 | 1854.99 |
| 25.63 | 2219.06 |
| 25.64 | 2652.46 |
| 25.65 | 1993.68 |
| 25.66 | 2132.37 |
| 25.67 | 1872.33 |
| 25.68 | 2184.38 |
| 25.69 | 1802.98 |
| 25.7  | 1629.62 |
| 25.71 | 2097.7  |
| 25.72 | 2340.41 |
| 25.73 | 2063.03 |
| 25.74 | 1924.34 |
| 25.75 | 2080.36 |
| 25.76 | 2427.09 |
| 25.77 | 2253.73 |
| 25.78 | 2444.43 |
| 25.79 | 2167.05 |
| 25.8  | 2097.7  |
| 25.81 | 2167.05 |
| 25.82 | 2132.37 |
| 25.83 | 2115.04 |
| 25.84 | 2132.37 |
| 25.85 | 2028.36 |
| 25.86 | 2548.45 |
| 25.87 | 2011.02 |
| 25.88 | 2461.76 |
| 25.89 | 2392.42 |
| 25.9  | 2375.08 |
| 25.91 | 2444.43 |

|       |         |
|-------|---------|
| 25.92 | 2600.46 |
| 25.93 | 2600.46 |
| 25.94 | 2444.43 |
| 25.95 | 2479.1  |
| 25.96 | 2427.09 |
| 25.97 | 2531.11 |
| 25.98 | 2427.09 |
| 25.99 | 2253.73 |
| 26    | 2184.38 |
| 26.01 | 2409.76 |
| 26.02 | 2097.7  |
| 26.03 | 2219.06 |
| 26.04 | 2115.04 |
| 26.05 | 2097.7  |
| 26.06 | 2548.45 |
| 26.07 | 2427.09 |
| 26.08 | 2340.41 |
| 26.09 | 1889.66 |
| 26.1  | 2184.38 |
| 26.11 | 2097.7  |
| 26.12 | 2063.03 |
| 26.13 | 2149.71 |
| 26.14 | 2097.7  |
| 26.15 | 2167.05 |
| 26.16 | 2340.41 |
| 26.17 | 2132.37 |
| 26.18 | 2323.07 |
| 26.19 | 2028.36 |
| 26.2  | 2149.71 |
| 26.21 | 2253.73 |
| 26.22 | 2565.78 |
| 26.23 | 2184.38 |
| 26.24 | 2392.42 |
| 26.25 | 2340.41 |
| 26.26 | 2357.75 |
| 26.27 | 1733.64 |
| 26.28 | 2288.4  |
| 26.29 | 1976.35 |
| 26.3  | 2375.08 |
| 26.31 | 2271.06 |
| 26.32 | 2115.04 |
| 26.33 | 2080.36 |
| 26.34 | 2583.12 |
| 26.35 | 2201.72 |

|       |         |
|-------|---------|
| 26.36 | 1993.68 |
| 26.37 | 2288.4  |
| 26.38 | 1924.34 |
| 26.39 | 2375.08 |
| 26.4  | 2323.07 |
| 26.41 | 2167.05 |
| 26.42 | 2167.05 |
| 26.43 | 2288.4  |
| 26.44 | 2392.42 |
| 26.45 | 2340.41 |
| 26.46 | 2635.13 |
| 26.47 | 2652.46 |
| 26.48 | 2825.83 |
| 26.49 | 3033.86 |
| 26.5  | 2635.13 |
| 26.51 | 2964.52 |
| 26.52 | 3103.21 |
| 26.53 | 3207.23 |
| 26.54 | 3449.94 |
| 26.55 | 3276.57 |
| 26.56 | 3536.62 |
| 26.57 | 3415.26 |
| 26.58 | 3761.99 |
| 26.59 | 4178.07 |
| 26.6  | 4074.05 |
| 26.61 | 3952.69 |
| 26.62 | 4022.04 |
| 26.63 | 3796.67 |
| 26.64 | 3571.29 |
| 26.65 | 3276.57 |
| 26.66 | 3120.55 |
| 26.67 | 3380.59 |
| 26.68 | 2583.12 |
| 26.69 | 2288.4  |
| 26.7  | 2583.12 |
| 26.71 | 2513.77 |
| 26.72 | 2721.81 |
| 26.73 | 2028.36 |
| 26.74 | 1941.67 |
| 26.75 | 2669.8  |
| 26.76 | 2565.78 |
| 26.77 | 2444.43 |
| 26.78 | 1959.01 |
| 26.79 | 2219.06 |

|       |         |
|-------|---------|
| 26.8  | 2063.03 |
| 26.81 | 2305.74 |
| 26.82 | 1837.66 |
| 26.83 | 2236.39 |
| 26.84 | 2253.73 |
| 26.85 | 2011.02 |
| 26.86 | 2132.37 |
| 26.87 | 2375.08 |
| 26.88 | 2132.37 |
| 26.89 | 2409.76 |
| 26.9  | 2305.74 |
| 26.91 | 2253.73 |
| 26.92 | 2444.43 |
| 26.93 | 2201.72 |
| 26.94 | 2236.39 |
| 26.95 | 2011.02 |
| 26.96 | 1820.32 |
| 26.97 | 2167.05 |
| 26.98 | 2149.71 |
| 26.99 | 2288.4  |
| 27    | 1889.66 |
| 27.01 | 2167.05 |
| 27.02 | 2236.39 |
| 27.03 | 2115.04 |
| 27.04 | 2444.43 |
| 27.05 | 2357.75 |
| 27.06 | 2219.06 |
| 27.07 | 2392.42 |
| 27.08 | 2063.03 |
| 27.09 | 2167.05 |
| 27.1  | 2201.72 |
| 27.11 | 2305.74 |
| 27.12 | 2045.69 |
| 27.13 | 2167.05 |
| 27.14 | 2236.39 |
| 27.15 | 2253.73 |
| 27.16 | 1872.33 |
| 27.17 | 2253.73 |
| 27.18 | 2115.04 |
| 27.19 | 2236.39 |
| 27.2  | 2115.04 |
| 27.21 | 2531.11 |
| 27.22 | 1976.35 |
| 27.23 | 2253.73 |

|       |         |
|-------|---------|
| 27.24 | 2045.69 |
| 27.25 | 2132.37 |
| 27.26 | 2219.06 |
| 27.27 | 2496.44 |
| 27.28 | 2045.69 |
| 27.29 | 2149.71 |
| 27.3  | 1750.97 |
| 27.31 | 1907    |
| 27.32 | 1854.99 |
| 27.33 | 1872.33 |
| 27.34 | 2011.02 |
| 27.35 | 2184.38 |
| 27.36 | 2201.72 |
| 27.37 | 2288.4  |
| 27.38 | 2028.36 |
| 27.39 | 2080.36 |
| 27.4  | 2496.44 |
| 27.41 | 1976.35 |
| 27.42 | 2323.07 |
| 27.43 | 2340.41 |
| 27.44 | 2045.69 |
| 27.45 | 2028.36 |
| 27.46 | 2115.04 |
| 27.47 | 2149.71 |
| 27.48 | 2149.71 |
| 27.49 | 2184.38 |
| 27.5  | 2132.37 |
| 27.51 | 2201.72 |
| 27.52 | 2253.73 |
| 27.53 | 1820.32 |
| 27.54 | 2288.4  |
| 27.55 | 2219.06 |
| 27.56 | 2097.7  |
| 27.57 | 2357.75 |
| 27.58 | 1924.34 |
| 27.59 | 2115.04 |
| 27.6  | 2045.69 |
| 27.61 | 2045.69 |
| 27.62 | 2219.06 |
| 27.63 | 2444.43 |
| 27.64 | 2375.08 |
| 27.65 | 2167.05 |
| 27.66 | 2080.36 |
| 27.67 | 2184.38 |



|       |         |
|-------|---------|
| 27.68 | 1681.63 |
| 27.69 | 1993.68 |
| 27.7  | 2028.36 |
| 27.71 | 2063.03 |
| 27.72 | 2409.76 |
| 27.73 | 2149.71 |
| 27.74 | 2115.04 |
| 27.75 | 1959.01 |
| 27.76 | 1889.66 |
| 27.77 | 2201.72 |
| 27.78 | 1889.66 |
| 27.79 | 1837.66 |
| 27.8  | 2115.04 |
| 27.81 | 2253.73 |
| 27.82 | 2271.06 |
| 27.83 | 2080.36 |
| 27.84 | 2149.71 |
| 27.85 | 2045.69 |
| 27.86 | 2236.39 |
| 27.87 | 1889.66 |
| 27.88 | 2409.76 |
| 27.89 | 2115.04 |
| 27.9  | 1976.35 |
| 27.91 | 2219.06 |
| 27.92 | 2444.43 |
| 27.93 | 2115.04 |
| 27.94 | 2028.36 |
| 27.95 | 1993.68 |
| 27.96 | 2080.36 |
| 27.97 | 2149.71 |
| 27.98 | 2288.4  |
| 27.99 | 2253.73 |
| 28    | 2288.4  |
| 28.01 | 2080.36 |
| 28.02 | 2357.75 |
| 28.03 | 2045.69 |
| 28.04 | 2357.75 |
| 28.05 | 2461.76 |
| 28.06 | 2201.72 |
| 28.07 | 2305.74 |
| 28.08 | 2201.72 |
| 28.09 | 2271.06 |
| 28.1  | 2011.02 |
| 28.11 | 2219.06 |

|       |         |
|-------|---------|
| 28.12 | 2375.08 |
| 28.13 | 2600.46 |
| 28.14 | 2565.78 |
| 28.15 | 2513.77 |
| 28.16 | 2323.07 |
| 28.17 | 2253.73 |
| 28.18 | 2080.36 |
| 28.19 | 2860.5  |
| 28.2  | 2357.75 |
| 28.21 | 2340.41 |
| 28.22 | 2167.05 |
| 28.23 | 2548.45 |
| 28.24 | 2496.44 |
| 28.25 | 2253.73 |
| 28.26 | 2340.41 |
| 28.27 | 2167.05 |
| 28.28 | 2167.05 |
| 28.29 | 2617.79 |
| 28.3  | 2219.06 |
| 28.31 | 2444.43 |
| 28.32 | 2531.11 |
| 28.33 | 2271.06 |
| 28.34 | 2496.44 |
| 28.35 | 2756.48 |
| 28.36 | 2687.14 |
| 28.37 | 2600.46 |
| 28.38 | 2652.46 |
| 28.39 | 2479.1  |
| 28.4  | 2617.79 |
| 28.41 | 2825.83 |
| 28.42 | 2721.81 |
| 28.43 | 3068.54 |
| 28.44 | 3155.22 |
| 28.45 | 3380.59 |
| 28.46 | 3363.26 |
| 28.47 | 3415.26 |
| 28.48 | 3363.26 |
| 28.49 | 3345.92 |
| 28.5  | 3588.63 |
| 28.51 | 3397.93 |
| 28.52 | 3172.56 |
| 28.53 | 3276.57 |
| 28.54 | 3415.26 |
| 28.55 | 3120.55 |

|       |         |
|-------|---------|
| 28.56 | 3432.6  |
| 28.57 | 3605.97 |
| 28.58 | 3640.64 |
| 28.59 | 3155.22 |
| 28.6  | 3328.58 |
| 28.61 | 3345.92 |
| 28.62 | 3484.61 |
| 28.63 | 3103.21 |
| 28.64 | 3363.26 |
| 28.65 | 3553.96 |
| 28.66 | 3519.28 |
| 28.67 | 3415.26 |
| 28.68 | 3484.61 |
| 28.69 | 3397.93 |
| 28.7  | 3744.66 |
| 28.71 | 3675.31 |
| 28.72 | 3657.97 |
| 28.73 | 3605.97 |
| 28.74 | 3207.23 |
| 28.75 | 3571.29 |
| 28.76 | 3432.6  |
| 28.77 | 3779.33 |
| 28.78 | 3571.29 |
| 28.79 | 3345.92 |
| 28.8  | 3675.31 |
| 28.81 | 3935.36 |
| 28.82 | 3536.62 |
| 28.83 | 4420.77 |
| 28.84 | 3467.27 |
| 28.85 | 3657.97 |
| 28.86 | 3709.98 |
| 28.87 | 3952.69 |
| 28.88 | 4056.71 |
| 28.89 | 4212.74 |
| 28.9  | 3519.28 |
| 28.91 | 3883.35 |
| 28.92 | 3987.37 |
| 28.93 | 4178.07 |
| 28.94 | 3935.36 |
| 28.95 | 4386.1  |
| 28.96 | 4074.05 |
| 28.97 | 4299.42 |
| 28.98 | 3935.36 |
| 28.99 | 4212.74 |

|       |         |
|-------|---------|
| 29    | 4715.49 |
| 29.01 | 4212.74 |
| 29.02 | 4628.81 |
| 29.03 | 4056.71 |
| 29.04 | 4524.79 |
| 29.05 | 4698.16 |
| 29.06 | 4386.1  |
| 29.07 | 5010.21 |
| 29.08 | 5200.91 |
| 29.09 | 5478.29 |
| 29.1  | 5408.95 |
| 29.11 | 5322.27 |
| 29.12 | 6397.12 |
| 29.13 | 6726.51 |
| 29.14 | 6518.48 |
| 29.15 | 6986.56 |
| 29.16 | 7263.94 |
| 29.17 | 8217.44 |
| 29.18 | 8512.16 |
| 29.19 | 8512.16 |
| 29.2  | 9396.31 |
| 29.21 | 10055.1 |
| 29.22 | 11875.4 |
| 29.23 | 11962.1 |
| 29.24 | 14181.2 |
| 29.25 | 14129.1 |
| 29.26 | 16244.2 |
| 29.27 | 17995.2 |
| 29.28 | 19330.1 |
| 29.29 | 22173.2 |
| 29.3  | 24166.9 |
| 29.31 | 25224.4 |
| 29.32 | 30356   |
| 29.33 | 34100.6 |
| 29.34 | 39370.9 |
| 29.35 | 42543.5 |
| 29.36 | 48247.1 |
| 29.37 | 53534.7 |
| 29.38 | 62272.2 |
| 29.39 | 71807.3 |
| 29.4  | 81099.5 |
| 29.41 | 93391   |
| 29.42 | 106567  |
| 29.43 | 124839  |

|       |         |
|-------|---------|
| 29.44 | 135276  |
| 29.45 | 156599  |
| 29.46 | 177022  |
| 29.47 | 194185  |
| 29.48 | 207586  |
| 29.49 | 220137  |
| 29.5  | 224211  |
| 29.51 | 217727  |
| 29.52 | 200183  |
| 29.53 | 179189  |
| 29.54 | 161662  |
| 29.55 | 145903  |
| 29.56 | 138310  |
| 29.57 | 127006  |
| 29.58 | 114923  |
| 29.59 | 97326.4 |
| 29.6  | 83266.6 |
| 29.61 | 66606.3 |
| 29.62 | 53222.7 |
| 29.63 | 42543.5 |
| 29.64 | 35973   |
| 29.65 | 27738.2 |
| 29.66 | 24062.9 |
| 29.67 | 21445.1 |
| 29.68 | 18723.3 |
| 29.69 | 16885.6 |
| 29.7  | 15100   |
| 29.71 | 14007.8 |
| 29.72 | 12395.5 |
| 29.73 | 11650   |
| 29.74 | 11615.4 |
| 29.75 | 9483    |
| 29.76 | 8928.23 |
| 29.77 | 8286.79 |
| 29.78 | 7836.04 |
| 29.79 | 7021.23 |
| 29.8  | 6639.83 |
| 29.81 | 6431.79 |
| 29.82 | 6379.78 |
| 29.83 | 6587.82 |
| 29.84 | 5842.36 |
| 29.85 | 5443.62 |
| 29.86 | 5755.67 |
| 29.87 | 5114.23 |

|       |         |
|-------|---------|
| 29.88 | 5495.63 |
| 29.89 | 5599.65 |
| 29.9  | 5027.55 |
| 29.91 | 4611.47 |
| 29.92 | 4767.5  |
| 29.93 | 4819.51 |
| 29.94 | 4056.71 |
| 29.95 | 4646.15 |
| 29.96 | 4282.08 |
| 29.97 | 3761.99 |
| 29.98 | 3987.37 |
| 29.99 | 4178.07 |
| 30    | 3900.68 |
| 30.01 | 3848.67 |
| 30.02 | 4767.5  |
| 30.03 | 3935.36 |
| 30.04 | 4386.1  |
| 30.05 | 4264.75 |
| 30.06 | 3848.67 |
| 30.07 | 3675.31 |
| 30.08 | 4143.39 |
| 30.09 | 4004.7  |
| 30.1  | 3623.3  |
| 30.11 | 3657.97 |
| 30.12 | 3640.64 |
| 30.13 | 3241.9  |
| 30.14 | 3415.26 |
| 30.15 | 3588.63 |
| 30.16 | 3571.29 |
| 30.17 | 3727.32 |
| 30.18 | 3536.62 |
| 30.19 | 3363.26 |
| 30.2  | 3467.27 |
| 30.21 | 3345.92 |
| 30.22 | 3640.64 |
| 30.23 | 3467.27 |
| 30.24 | 3172.56 |
| 30.25 | 2929.85 |
| 30.26 | 3224.56 |
| 30.27 | 3085.87 |
| 30.28 | 3224.56 |
| 30.29 | 3189.89 |
| 30.3  | 2565.78 |
| 30.31 | 2687.14 |

|       |         |
|-------|---------|
| 30.32 | 2513.77 |
| 30.33 | 2912.51 |
| 30.34 | 3051.2  |
| 30.35 | 2860.5  |
| 30.36 | 3189.89 |
| 30.37 | 2600.46 |
| 30.38 | 2756.48 |
| 30.39 | 3033.86 |
| 30.4  | 2964.52 |
| 30.41 | 2860.5  |
| 30.42 | 2895.17 |
| 30.43 | 3207.23 |
| 30.44 | 2791.16 |
| 30.45 | 2791.16 |
| 30.46 | 3224.56 |
| 30.47 | 3051.2  |
| 30.48 | 2912.51 |
| 30.49 | 2704.47 |
| 30.5  | 3068.54 |
| 30.51 | 3311.25 |
| 30.52 | 2721.81 |
| 30.53 | 3276.57 |
| 30.54 | 2877.84 |
| 30.55 | 3016.53 |
| 30.56 | 3224.56 |
| 30.57 | 2912.51 |
| 30.58 | 3588.63 |
| 30.59 | 3241.9  |
| 30.6  | 3103.21 |
| 30.61 | 3137.88 |
| 30.62 | 2964.52 |
| 30.63 | 3397.93 |
| 30.64 | 3224.56 |
| 30.65 | 3519.28 |
| 30.66 | 3328.58 |
| 30.67 | 3276.57 |
| 30.68 | 3293.91 |
| 30.69 | 2947.18 |
| 30.7  | 2791.16 |
| 30.71 | 3068.54 |
| 30.72 | 3068.54 |
| 30.73 | 3085.87 |
| 30.74 | 2860.5  |
| 30.75 | 2236.39 |

|       |         |
|-------|---------|
| 30.76 | 2236.39 |
| 30.77 | 2739.15 |
| 30.78 | 2652.46 |
| 30.79 | 2513.77 |
| 30.8  | 2617.79 |
| 30.81 | 2825.83 |
| 30.82 | 2583.12 |
| 30.83 | 2479.1  |
| 30.84 | 2929.85 |
| 30.85 | 2964.52 |
| 30.86 | 2479.1  |
| 30.87 | 2617.79 |
| 30.88 | 2357.75 |
| 30.89 | 2687.14 |
| 30.9  | 2791.16 |
| 30.91 | 2409.76 |
| 30.92 | 2305.74 |
| 30.93 | 2843.16 |
| 30.94 | 3016.53 |
| 30.95 | 2444.43 |
| 30.96 | 2496.44 |
| 30.97 | 2392.42 |
| 30.98 | 2531.11 |
| 30.99 | 2652.46 |
| 31    | 2531.11 |
| 31.01 | 2669.8  |
| 31.02 | 2617.79 |
| 31.03 | 2548.45 |
| 31.04 | 2773.82 |
| 31.05 | 2669.8  |
| 31.06 | 2479.1  |
| 31.07 | 2548.45 |
| 31.08 | 2600.46 |
| 31.09 | 2531.11 |
| 31.1  | 2513.77 |
| 31.11 | 2531.11 |
| 31.12 | 2288.4  |
| 31.13 | 2427.09 |
| 31.14 | 2201.72 |
| 31.15 | 2652.46 |
| 31.16 | 2999.19 |
| 31.17 | 2756.48 |
| 31.18 | 2687.14 |
| 31.19 | 2600.46 |



|       |         |
|-------|---------|
| 31.2  | 2219.06 |
| 31.21 | 2184.38 |
| 31.22 | 2357.75 |
| 31.23 | 2496.44 |
| 31.24 | 2999.19 |
| 31.25 | 2357.75 |
| 31.26 | 2808.49 |
| 31.27 | 2791.16 |
| 31.28 | 2583.12 |
| 31.29 | 2791.16 |
| 31.3  | 2964.52 |
| 31.31 | 2479.1  |
| 31.32 | 2808.49 |
| 31.33 | 2617.79 |
| 31.34 | 2947.18 |
| 31.35 | 3033.86 |
| 31.36 | 3276.57 |
| 31.37 | 3189.89 |
| 31.38 | 3484.61 |
| 31.39 | 3623.3  |
| 31.4  | 3900.68 |
| 31.41 | 4334.09 |
| 31.42 | 4108.72 |
| 31.43 | 4732.83 |
| 31.44 | 4992.87 |
| 31.45 | 4958.2  |
| 31.46 | 6033.06 |
| 31.47 | 6223.76 |
| 31.48 | 6657.17 |
| 31.49 | 6778.52 |
| 31.5  | 7818.7  |
| 31.51 | 7506.65 |
| 31.52 | 7714.69 |
| 31.53 | 7662.68 |
| 31.54 | 7818.7  |
| 31.55 | 7714.69 |
| 31.56 | 6691.84 |
| 31.57 | 6709.18 |
| 31.58 | 5929.04 |
| 31.59 | 5929.04 |
| 31.6  | 6241.09 |
| 31.61 | 5738.34 |
| 31.62 | 5339.6  |
| 31.63 | 4854.18 |

|       |         |
|-------|---------|
| 31.64 | 4022.04 |
| 31.65 | 3380.59 |
| 31.66 | 3501.95 |
| 31.67 | 3519.28 |
| 31.68 | 2912.51 |
| 31.69 | 2981.86 |
| 31.7  | 2444.43 |
| 31.71 | 2947.18 |
| 31.72 | 2843.16 |
| 31.73 | 2513.77 |
| 31.74 | 2513.77 |
| 31.75 | 2635.13 |
| 31.76 | 2843.16 |
| 31.77 | 3155.22 |
| 31.78 | 3103.21 |
| 31.79 | 2843.16 |
| 31.8  | 3207.23 |
| 31.81 | 2929.85 |
| 31.82 | 2548.45 |
| 31.83 | 2964.52 |
| 31.84 | 2843.16 |
| 31.85 | 2843.16 |
| 31.86 | 2617.79 |
| 31.87 | 2843.16 |
| 31.88 | 2947.18 |
| 31.89 | 3224.56 |
| 31.9  | 2479.1  |
| 31.91 | 2600.46 |
| 31.92 | 2305.74 |
| 31.93 | 2409.76 |
| 31.94 | 2011.02 |
| 31.95 | 2929.85 |
| 31.96 | 2219.06 |
| 31.97 | 2479.1  |
| 31.98 | 1820.32 |
| 31.99 | 1959.01 |
| 32    | 2513.77 |
| 32.01 | 2340.41 |
| 32.02 | 2236.39 |
| 32.03 | 2045.69 |
| 32.04 | 2219.06 |
| 32.05 | 2271.06 |
| 32.06 | 2479.1  |
| 32.07 | 2201.72 |

|       |         |
|-------|---------|
| 32.08 | 2063.03 |
| 32.09 | 2097.7  |
| 32.1  | 2496.44 |
| 32.11 | 2045.69 |
| 32.12 | 2063.03 |
| 32.13 | 2461.76 |
| 32.14 | 2253.73 |
| 32.15 | 2132.37 |
| 32.16 | 2340.41 |
| 32.17 | 2427.09 |
| 32.18 | 2097.7  |
| 32.19 | 2392.42 |
| 32.2  | 2409.76 |
| 32.21 | 2097.7  |
| 32.22 | 2323.07 |
| 32.23 | 2340.41 |
| 32.24 | 2201.72 |
| 32.25 | 2340.41 |
| 32.26 | 2288.4  |
| 32.27 | 2132.37 |
| 32.28 | 2011.02 |
| 32.29 | 1924.34 |
| 32.3  | 2028.36 |
| 32.31 | 2427.09 |
| 32.32 | 2132.37 |
| 32.33 | 2063.03 |
| 32.34 | 1993.68 |
| 32.35 | 2011.02 |
| 32.36 | 2201.72 |
| 32.37 | 1941.67 |
| 32.38 | 2011.02 |
| 32.39 | 2045.69 |
| 32.4  | 2184.38 |
| 32.41 | 2288.4  |
| 32.42 | 2357.75 |
| 32.43 | 1733.64 |
| 32.44 | 2253.73 |
| 32.45 | 2565.78 |
| 32.46 | 2375.08 |
| 32.47 | 2669.8  |
| 32.48 | 2531.11 |
| 32.49 | 2427.09 |
| 32.5  | 2565.78 |
| 32.51 | 2687.14 |

|       |         |
|-------|---------|
| 32.52 | 2479.1  |
| 32.53 | 2201.72 |
| 32.54 | 2271.06 |
| 32.55 | 2149.71 |
| 32.56 | 2548.45 |
| 32.57 | 2427.09 |
| 32.58 | 2357.75 |
| 32.59 | 2427.09 |
| 32.6  | 2167.05 |
| 32.61 | 1837.66 |
| 32.62 | 2045.69 |
| 32.63 | 1733.64 |
| 32.64 | 1993.68 |
| 32.65 | 2132.37 |
| 32.66 | 2253.73 |
| 32.67 | 1854.99 |
| 32.68 | 1854.99 |
| 32.69 | 1820.32 |
| 32.7  | 2080.36 |
| 32.71 | 2149.71 |
| 32.72 | 1941.67 |
| 32.73 | 2080.36 |
| 32.74 | 1993.68 |
| 32.75 | 2167.05 |
| 32.76 | 2097.7  |
| 32.77 | 1854.99 |
| 32.78 | 1907    |
| 32.79 | 1733.64 |
| 32.8  | 2184.38 |
| 32.81 | 2063.03 |
| 32.82 | 1716.3  |
| 32.83 | 1976.35 |
| 32.84 | 2028.36 |
| 32.85 | 1959.01 |
| 32.86 | 2201.72 |
| 32.87 | 1924.34 |
| 32.88 | 2236.39 |
| 32.89 | 2219.06 |
| 32.9  | 1924.34 |
| 32.91 | 1854.99 |
| 32.92 | 1941.67 |
| 32.93 | 2184.38 |
| 32.94 | 2132.37 |
| 32.95 | 1889.66 |

|       |         |
|-------|---------|
| 32.96 | 2132.37 |
| 32.97 | 1802.98 |
| 32.98 | 1993.68 |
| 32.99 | 2028.36 |
| 33    | 2080.36 |
| 33.01 | 1941.67 |
| 33.02 | 2097.7  |
| 33.03 | 2097.7  |
| 33.04 | 2063.03 |
| 33.05 | 1907    |
| 33.06 | 2201.72 |
| 33.07 | 2011.02 |
| 33.08 | 1976.35 |
| 33.09 | 2011.02 |
| 33.1  | 2167.05 |
| 33.11 | 2063.03 |
| 33.12 | 2080.36 |
| 33.13 | 1733.64 |
| 33.14 | 1785.65 |
| 33.15 | 2115.04 |
| 33.16 | 1750.97 |
| 33.17 | 2028.36 |
| 33.18 | 2167.05 |
| 33.19 | 2097.7  |
| 33.2  | 2253.73 |
| 33.21 | 1785.65 |
| 33.22 | 1664.29 |
| 33.23 | 1924.34 |
| 33.24 | 1698.96 |
| 33.25 | 1837.66 |
| 33.26 | 1959.01 |
| 33.27 | 1577.61 |
| 33.28 | 1924.34 |
| 33.29 | 1594.95 |
| 33.3  | 2132.37 |
| 33.31 | 1924.34 |
| 33.32 | 1854.99 |
| 33.33 | 1646.96 |
| 33.34 | 2011.02 |
| 33.35 | 2149.71 |
| 33.36 | 2097.7  |
| 33.37 | 1907    |
| 33.38 | 1837.66 |
| 33.39 | 1664.29 |

33.4 2011.02  
33.41 1646.96  
33.42 1733.64  
33.43 1698.96  
33.44 1889.66  
33.45 2080.36  
33.46 1681.63  
33.47 2167.05  
33.48 1698.96  
33.49 1646.96  
33.5 1907  
33.51 1664.29  
33.52 1733.64  
33.53 1959.01  
33.54 1941.67  
33.55 1993.68  
33.56 1594.95  
33.57 1802.98  
33.58 1837.66  
33.59 1854.99  
33.6 1976.35  
33.61 1872.33  
33.62 1820.32  
33.63 1924.34  
33.64 2132.37  
33.65 1664.29  
33.66 1976.35  
33.67 1941.67  
33.68 1820.32  
33.69 2063.03  
33.7 1907  
33.71 1750.97  
33.72 1907  
33.73 1802.98  
33.74 1733.64  
33.75 1959.01  
33.76 2045.69  
33.77 1854.99  
33.78 2028.36  
33.79 1889.66  
33.8 2011.02  
33.81 2080.36  
33.82 1837.66  
33.83 2063.03

|       |         |
|-------|---------|
| 33.84 | 1646.96 |
| 33.85 | 2063.03 |
| 33.86 | 1993.68 |
| 33.87 | 2063.03 |
| 33.88 | 1820.32 |
| 33.89 | 1646.96 |
| 33.9  | 1716.3  |
| 33.91 | 1976.35 |
| 33.92 | 1924.34 |
| 33.93 | 2063.03 |
| 33.94 | 2115.04 |
| 33.95 | 1577.61 |
| 33.96 | 1490.93 |
| 33.97 | 1889.66 |
| 33.98 | 1907    |
| 33.99 | 1993.68 |
| 34    | 1889.66 |
| 34.01 | 2080.36 |
| 34.02 | 1976.35 |
| 34.03 | 2045.69 |
| 34.04 | 1976.35 |
| 34.05 | 1837.66 |
| 34.06 | 2028.36 |
| 34.07 | 1629.62 |
| 34.08 | 1681.63 |
| 34.09 | 1924.34 |
| 34.1  | 2011.02 |
| 34.11 | 1872.33 |
| 34.12 | 1907    |
| 34.13 | 1924.34 |
| 34.14 | 1802.98 |
| 34.15 | 1750.97 |
| 34.16 | 1837.66 |
| 34.17 | 2115.04 |
| 34.18 | 2028.36 |
| 34.19 | 1993.68 |
| 34.2  | 1664.29 |
| 34.21 | 1820.32 |
| 34.22 | 1785.65 |
| 34.23 | 2011.02 |
| 34.24 | 1837.66 |
| 34.25 | 1664.29 |
| 34.26 | 1750.97 |
| 34.27 | 1785.65 |

|       |         |
|-------|---------|
| 34.28 | 1785.65 |
| 34.29 | 1959.01 |
| 34.3  | 1664.29 |
| 34.31 | 1820.32 |
| 34.32 | 1993.68 |
| 34.33 | 1750.97 |
| 34.34 | 1560.27 |
| 34.35 | 1802.98 |
| 34.36 | 1768.31 |
| 34.37 | 1889.66 |
| 34.38 | 1976.35 |
| 34.39 | 1837.66 |
| 34.4  | 1993.68 |
| 34.41 | 1889.66 |
| 34.42 | 2045.69 |
| 34.43 | 2115.04 |
| 34.44 | 1854.99 |
| 34.45 | 1889.66 |
| 34.46 | 1733.64 |
| 34.47 | 1837.66 |
| 34.48 | 1768.31 |
| 34.49 | 1542.94 |
| 34.5  | 2080.36 |
| 34.51 | 1924.34 |
| 34.52 | 2097.7  |
| 34.53 | 1854.99 |
| 34.54 | 1698.96 |
| 34.55 | 1854.99 |
| 34.56 | 1872.33 |
| 34.57 | 1907    |
| 34.58 | 1854.99 |
| 34.59 | 1889.66 |
| 34.6  | 1993.68 |
| 34.61 | 1872.33 |
| 34.62 | 1750.97 |
| 34.63 | 1768.31 |
| 34.64 | 1802.98 |
| 34.65 | 1889.66 |
| 34.66 | 1959.01 |
| 34.67 | 2219.06 |
| 34.68 | 2357.75 |
| 34.69 | 1820.32 |
| 34.7  | 2045.69 |
| 34.71 | 1907    |



|       |         |
|-------|---------|
| 34.72 | 1733.64 |
| 34.73 | 1681.63 |
| 34.74 | 2045.69 |
| 34.75 | 2011.02 |
| 34.76 | 2080.36 |
| 34.77 | 1837.66 |
| 34.78 | 1976.35 |
| 34.79 | 1993.68 |
| 34.8  | 1612.28 |
| 34.81 | 1959.01 |
| 34.82 | 1907    |
| 34.83 | 1924.34 |
| 34.84 | 2115.04 |
| 34.85 | 1959.01 |
| 34.86 | 1993.68 |
| 34.87 | 1820.32 |
| 34.88 | 2063.03 |
| 34.89 | 1941.67 |
| 34.9  | 1993.68 |
| 34.91 | 1629.62 |
| 34.92 | 1993.68 |
| 34.93 | 1698.96 |
| 34.94 | 1802.98 |
| 34.95 | 2201.72 |
| 34.96 | 1959.01 |
| 34.97 | 1907    |
| 34.98 | 2132.37 |
| 34.99 | 2219.06 |
| 35    | 1837.66 |
| 35.01 | 1802.98 |
| 35.02 | 1802.98 |
| 35.03 | 1959.01 |
| 35.04 | 1907    |
| 35.05 | 1733.64 |
| 35.06 | 1941.67 |
| 35.07 | 1785.65 |
| 35.08 | 1733.64 |
| 35.09 | 1594.95 |
| 35.1  | 1768.31 |
| 35.11 | 2045.69 |
| 35.12 | 1889.66 |
| 35.13 | 1872.33 |
| 35.14 | 2184.38 |
| 35.15 | 2011.02 |

35.16 1907  
35.17 1872.33  
35.18 2149.71  
35.19 1976.35  
35.2 2201.72  
35.21 1924.34  
35.22 1907  
35.23 1698.96  
35.24 1854.99  
35.25 1993.68  
35.26 1820.32  
35.27 1976.35  
35.28 2011.02  
35.29 1802.98  
35.3 1802.98  
35.31 1802.98  
35.32 1629.62  
35.33 1698.96  
35.34 2028.36  
35.35 1941.67  
35.36 2149.71  
35.37 1959.01  
35.38 2167.05  
35.39 1854.99  
35.4 2167.05  
35.41 1716.3  
35.42 2028.36  
35.43 1889.66  
35.44 2219.06  
35.45 1924.34  
35.46 2080.36  
35.47 1733.64  
35.48 2045.69  
35.49 2219.06  
35.5 2115.04  
35.51 2045.69  
35.52 1941.67  
35.53 1976.35  
35.54 2167.05  
35.55 2323.07  
35.56 2253.73  
35.57 2115.04  
35.58 2236.39  
35.59 2028.36

|       |         |
|-------|---------|
| 35.6  | 2305.74 |
| 35.61 | 1924.34 |
| 35.62 | 2132.37 |
| 35.63 | 2167.05 |
| 35.64 | 2028.36 |
| 35.65 | 1924.34 |
| 35.66 | 2219.06 |
| 35.67 | 2045.69 |
| 35.68 | 2288.4  |
| 35.69 | 1907    |
| 35.7  | 2028.36 |
| 35.71 | 1959.01 |
| 35.72 | 1993.68 |
| 35.73 | 2704.47 |
| 35.74 | 2271.06 |
| 35.75 | 2392.42 |
| 35.76 | 2271.06 |
| 35.77 | 2513.77 |
| 35.78 | 2288.4  |
| 35.79 | 3016.53 |
| 35.8  | 2947.18 |
| 35.81 | 2635.13 |
| 35.82 | 2877.84 |
| 35.83 | 2999.19 |
| 35.84 | 2947.18 |
| 35.85 | 3051.2  |
| 35.86 | 3640.64 |
| 35.87 | 3970.03 |
| 35.88 | 4316.76 |
| 35.89 | 4611.47 |
| 35.9  | 4316.76 |
| 35.91 | 5391.61 |
| 35.92 | 5114.23 |
| 35.93 | 5252.92 |
| 35.94 | 6570.48 |
| 35.95 | 7697.35 |
| 35.96 | 8182.77 |
| 35.97 | 9396.31 |
| 35.98 | 10696.5 |
| 35.99 | 12308.8 |
| 36    | 14233.2 |
| 36.01 | 16955   |
| 36.02 | 18879.3 |
| 36.03 | 20404.9 |

|       |         |
|-------|---------|
| 36.04 | 22554.6 |
| 36.05 | 25363.1 |
| 36.06 | 27200.8 |
| 36.07 | 27876.9 |
| 36.08 | 27287.4 |
| 36.09 | 26403.3 |
| 36.1  | 24322.9 |
| 36.11 | 21393.1 |
| 36.12 | 18653.9 |
| 36.13 | 18255.2 |
| 36.14 | 17821.8 |
| 36.15 | 16209.5 |
| 36.16 | 15654.7 |
| 36.17 | 14649.2 |
| 36.18 | 13609.1 |
| 36.19 | 12170.1 |
| 36.2  | 10471.2 |
| 36.21 | 8633.51 |
| 36.22 | 6743.85 |
| 36.23 | 6414.46 |
| 36.24 | 5408.95 |
| 36.25 | 5166.24 |
| 36.26 | 4108.72 |
| 36.27 | 3657.97 |
| 36.28 | 3328.58 |
| 36.29 | 3276.57 |
| 36.3  | 3103.21 |
| 36.31 | 3120.55 |
| 36.32 | 2791.16 |
| 36.33 | 2392.42 |
| 36.34 | 2236.39 |
| 36.35 | 2531.11 |
| 36.36 | 2409.76 |
| 36.37 | 2149.71 |
| 36.38 | 2115.04 |
| 36.39 | 2184.38 |
| 36.4  | 2219.06 |
| 36.41 | 2097.7  |
| 36.42 | 2357.75 |
| 36.43 | 2080.36 |
| 36.44 | 1959.01 |
| 36.45 | 1716.3  |
| 36.46 | 1664.29 |
| 36.47 | 1802.98 |

|       |         |
|-------|---------|
| 36.48 | 2115.04 |
| 36.49 | 1854.99 |
| 36.5  | 1941.67 |
| 36.51 | 1889.66 |
| 36.52 | 1941.67 |
| 36.53 | 1854.99 |
| 36.54 | 2132.37 |
| 36.55 | 1802.98 |
| 36.56 | 2045.69 |
| 36.57 | 1785.65 |
| 36.58 | 1924.34 |
| 36.59 | 2063.03 |
| 36.6  | 1785.65 |
| 36.61 | 1768.31 |
| 36.62 | 1907    |
| 36.63 | 1698.96 |
| 36.64 | 1750.97 |
| 36.65 | 1664.29 |
| 36.66 | 1542.94 |
| 36.67 | 1820.32 |
| 36.68 | 1889.66 |
| 36.69 | 1629.62 |
| 36.7  | 1785.65 |
| 36.71 | 1508.26 |
| 36.72 | 1560.27 |
| 36.73 | 1733.64 |
| 36.74 | 1664.29 |
| 36.75 | 2149.71 |
| 36.76 | 1907    |
| 36.77 | 1802.98 |
| 36.78 | 1768.31 |
| 36.79 | 1646.96 |
| 36.8  | 1941.67 |
| 36.81 | 1386.91 |
| 36.82 | 1716.3  |
| 36.83 | 1837.66 |
| 36.84 | 1716.3  |
| 36.85 | 1750.97 |
| 36.86 | 1473.59 |
| 36.87 | 1993.68 |
| 36.88 | 1698.96 |
| 36.89 | 1646.96 |
| 36.9  | 1889.66 |
| 36.91 | 1542.94 |

|       |         |
|-------|---------|
| 36.92 | 1681.63 |
| 36.93 | 1733.64 |
| 36.94 | 1300.23 |
| 36.95 | 1664.29 |
| 36.96 | 1664.29 |
| 36.97 | 1334.9  |
| 36.98 | 1594.95 |
| 36.99 | 1681.63 |
| 37    | 2028.36 |
| 37.01 | 1473.59 |
| 37.02 | 1490.93 |
| 37.03 | 1612.28 |
| 37.04 | 1612.28 |
| 37.05 | 1594.95 |
| 37.06 | 1404.25 |
| 37.07 | 1629.62 |
| 37.08 | 1664.29 |
| 37.09 | 1508.26 |
| 37.1  | 1386.91 |
| 37.11 | 1698.96 |
| 37.12 | 1646.96 |
| 37.13 | 1594.95 |
| 37.14 | 1508.26 |
| 37.15 | 1334.9  |
| 37.16 | 1854.99 |
| 37.17 | 1646.96 |
| 37.18 | 1490.93 |
| 37.19 | 1196.21 |
| 37.2  | 1681.63 |
| 37.21 | 1785.65 |
| 37.22 | 1612.28 |
| 37.23 | 1508.26 |
| 37.24 | 1646.96 |
| 37.25 | 1820.32 |
| 37.26 | 1646.96 |
| 37.27 | 1594.95 |
| 37.28 | 1456.26 |
| 37.29 | 1802.98 |
| 37.3  | 1508.26 |
| 37.31 | 1629.62 |
| 37.32 | 1733.64 |
| 37.33 | 1750.97 |
| 37.34 | 1612.28 |
| 37.35 | 1352.24 |

|       |         |
|-------|---------|
| 37.36 | 1473.59 |
| 37.37 | 1473.59 |
| 37.38 | 1733.64 |
| 37.39 | 1750.97 |
| 37.4  | 1594.95 |
| 37.41 | 1577.61 |
| 37.42 | 1837.66 |
| 37.43 | 1698.96 |
| 37.44 | 1577.61 |
| 37.45 | 1317.56 |
| 37.46 | 1802.98 |
| 37.47 | 1265.56 |
| 37.48 | 1594.95 |
| 37.49 | 1820.32 |
| 37.5  | 1300.23 |
| 37.51 | 1594.95 |
| 37.52 | 1456.26 |
| 37.53 | 1525.6  |
| 37.54 | 1716.3  |
| 37.55 | 1629.62 |
| 37.56 | 1664.29 |
| 37.57 | 1352.24 |
| 37.58 | 1785.65 |
| 37.59 | 1508.26 |
| 37.6  | 1716.3  |
| 37.61 | 1785.65 |
| 37.62 | 1837.66 |
| 37.63 | 1542.94 |
| 37.64 | 1560.27 |
| 37.65 | 1785.65 |
| 37.66 | 1542.94 |
| 37.67 | 1750.97 |
| 37.68 | 1646.96 |
| 37.69 | 1854.99 |
| 37.7  | 1334.9  |
| 37.71 | 1716.3  |
| 37.72 | 1785.65 |
| 37.73 | 1594.95 |
| 37.74 | 1820.32 |
| 37.75 | 1820.32 |
| 37.76 | 1421.58 |
| 37.77 | 1629.62 |
| 37.78 | 1612.28 |
| 37.79 | 1594.95 |

|       |         |
|-------|---------|
| 37.8  | 1456.26 |
| 37.81 | 1438.92 |
| 37.82 | 1802.98 |
| 37.83 | 1664.29 |
| 37.84 | 1612.28 |
| 37.85 | 1300.23 |
| 37.86 | 1386.91 |
| 37.87 | 1456.26 |
| 37.88 | 1456.26 |
| 37.89 | 1508.26 |
| 37.9  | 1646.96 |
| 37.91 | 1594.95 |
| 37.92 | 1993.68 |
| 37.93 | 1976.35 |
| 37.94 | 1612.28 |
| 37.95 | 1473.59 |
| 37.96 | 1386.91 |
| 37.97 | 1907    |
| 37.98 | 1508.26 |
| 37.99 | 1716.3  |
| 38    | 1698.96 |
| 38.01 | 1473.59 |
| 38.02 | 1473.59 |
| 38.03 | 1768.31 |
| 38.04 | 1854.99 |
| 38.05 | 1681.63 |
| 38.06 | 1750.97 |
| 38.07 | 1594.95 |
| 38.08 | 1508.26 |
| 38.09 | 1196.21 |
| 38.1  | 1317.56 |
| 38.11 | 1681.63 |
| 38.12 | 1802.98 |
| 38.13 | 1785.65 |
| 38.14 | 1907    |
| 38.15 | 1750.97 |
| 38.16 | 1577.61 |
| 38.17 | 1768.31 |
| 38.18 | 2063.03 |
| 38.19 | 1612.28 |
| 38.2  | 1664.29 |
| 38.21 | 1837.66 |
| 38.22 | 1542.94 |
| 38.23 | 1802.98 |



|       |         |
|-------|---------|
| 38.24 | 1612.28 |
| 38.25 | 1525.6  |
| 38.26 | 1698.96 |
| 38.27 | 1785.65 |
| 38.28 | 1924.34 |
| 38.29 | 2097.7  |
| 38.3  | 1750.97 |
| 38.31 | 1698.96 |
| 38.32 | 1490.93 |
| 38.33 | 1681.63 |
| 38.34 | 1438.92 |
| 38.35 | 1646.96 |
| 38.36 | 1681.63 |
| 38.37 | 1646.96 |
| 38.38 | 1681.63 |
| 38.39 | 1924.34 |
| 38.4  | 1716.3  |
| 38.41 | 1889.66 |
| 38.42 | 1872.33 |
| 38.43 | 1317.56 |
| 38.44 | 1594.95 |
| 38.45 | 1646.96 |
| 38.46 | 1820.32 |
| 38.47 | 1733.64 |
| 38.48 | 2115.04 |
| 38.49 | 1976.35 |
| 38.5  | 1820.32 |
| 38.51 | 1733.64 |
| 38.52 | 1560.27 |
| 38.53 | 1577.61 |
| 38.54 | 1941.67 |
| 38.55 | 1629.62 |
| 38.56 | 1924.34 |
| 38.57 | 1993.68 |
| 38.58 | 1837.66 |
| 38.59 | 1594.95 |
| 38.6  | 1854.99 |
| 38.61 | 2011.02 |
| 38.62 | 1820.32 |
| 38.63 | 2115.04 |
| 38.64 | 1785.65 |
| 38.65 | 1681.63 |
| 38.66 | 1716.3  |
| 38.67 | 1490.93 |

|       |         |
|-------|---------|
| 38.68 | 1594.95 |
| 38.69 | 2028.36 |
| 38.7  | 1872.33 |
| 38.71 | 1785.65 |
| 38.72 | 1698.96 |
| 38.73 | 1854.99 |
| 38.74 | 1768.31 |
| 38.75 | 1941.67 |
| 38.76 | 1854.99 |
| 38.77 | 2531.11 |
| 38.78 | 1976.35 |
| 38.79 | 1716.3  |
| 38.8  | 1646.96 |
| 38.81 | 2080.36 |
| 38.82 | 1959.01 |
| 38.83 | 1837.66 |
| 38.84 | 1802.98 |
| 38.85 | 1854.99 |
| 38.86 | 2011.02 |
| 38.87 | 1993.68 |
| 38.88 | 1854.99 |
| 38.89 | 2236.39 |
| 38.9  | 2236.39 |
| 38.91 | 2288.4  |
| 38.92 | 1941.67 |
| 38.93 | 2097.7  |
| 38.94 | 2461.76 |
| 38.95 | 2236.39 |
| 38.96 | 2115.04 |
| 38.97 | 2132.37 |
| 38.98 | 2080.36 |
| 38.99 | 1785.65 |
| 39    | 1941.67 |
| 39.01 | 2340.41 |
| 39.02 | 2011.02 |
| 39.03 | 1993.68 |
| 39.04 | 2201.72 |
| 39.05 | 1889.66 |
| 39.06 | 2132.37 |
| 39.07 | 1889.66 |
| 39.08 | 1941.67 |
| 39.09 | 2149.71 |
| 39.1  | 2167.05 |
| 39.11 | 2409.76 |

|       |         |
|-------|---------|
| 39.12 | 2080.36 |
| 39.13 | 2045.69 |
| 39.14 | 2063.03 |
| 39.15 | 2201.72 |
| 39.16 | 2063.03 |
| 39.17 | 2063.03 |
| 39.18 | 2548.45 |
| 39.19 | 2531.11 |
| 39.2  | 2825.83 |
| 39.21 | 2825.83 |
| 39.22 | 3276.57 |
| 39.23 | 3189.89 |
| 39.24 | 3120.55 |
| 39.25 | 3363.26 |
| 39.26 | 3935.36 |
| 39.27 | 4334.09 |
| 39.28 | 4126.06 |
| 39.29 | 4871.52 |
| 39.3  | 5166.24 |
| 39.31 | 5339.6  |
| 39.32 | 5668.99 |
| 39.33 | 5963.71 |
| 39.34 | 6050.39 |
| 39.35 | 7523.98 |
| 39.36 | 8546.83 |
| 39.37 | 8720.19 |
| 39.38 | 9951.08 |
| 39.39 | 10349.8 |
| 39.4  | 11788.7 |
| 39.41 | 14250.5 |
| 39.42 | 16712.3 |
| 39.43 | 18879.3 |
| 39.44 | 21913.2 |
| 39.45 | 23005.4 |
| 39.46 | 26888.7 |
| 39.47 | 32089.6 |
| 39.48 | 33927.3 |
| 39.49 | 37151.8 |
| 39.5  | 38660.1 |
| 39.51 | 40497.8 |
| 39.52 | 39492.3 |
| 39.53 | 35210.2 |
| 39.54 | 31361.5 |
| 39.55 | 28414.3 |

|       |         |
|-------|---------|
| 39.56 | 27131.4 |
| 39.57 | 25571.1 |
| 39.58 | 24149.6 |
| 39.59 | 23334.8 |
| 39.6  | 23386.8 |
| 39.61 | 21705.1 |
| 39.62 | 20647.6 |
| 39.63 | 18445.9 |
| 39.64 | 16209.5 |
| 39.65 | 13297   |
| 39.66 | 11598   |
| 39.67 | 9361.64 |
| 39.68 | 7870.71 |
| 39.69 | 7194.59 |
| 39.7  | 5721    |
| 39.71 | 5166.24 |
| 39.72 | 4420.77 |
| 39.73 | 4282.08 |
| 39.74 | 4074.05 |
| 39.75 | 3640.64 |
| 39.76 | 3866.01 |
| 39.77 | 3692.65 |
| 39.78 | 3051.2  |
| 39.79 | 3033.86 |
| 39.8  | 2825.83 |
| 39.81 | 2687.14 |
| 39.82 | 2739.15 |
| 39.83 | 2600.46 |
| 39.84 | 2531.11 |
| 39.85 | 2305.74 |
| 39.86 | 2253.73 |
| 39.87 | 2271.06 |
| 39.88 | 2375.08 |
| 39.89 | 2253.73 |
| 39.9  | 2305.74 |
| 39.91 | 2357.75 |
| 39.92 | 2271.06 |
| 39.93 | 2253.73 |
| 39.94 | 2496.44 |
| 39.95 | 2080.36 |
| 39.96 | 1976.35 |
| 39.97 | 2149.71 |
| 39.98 | 2115.04 |
| 39.99 | 2409.76 |

|       |         |
|-------|---------|
| 40    | 2063.03 |
| 40.01 | 2080.36 |
| 40.02 | 2115.04 |
| 40.03 | 2063.03 |
| 40.04 | 2011.02 |
| 40.05 | 2201.72 |
| 40.06 | 2149.71 |
| 40.07 | 2115.04 |
| 40.08 | 1976.35 |
| 40.09 | 1872.33 |
| 40.1  | 1612.28 |
| 40.11 | 1612.28 |
| 40.12 | 1802.98 |
| 40.13 | 1941.67 |
| 40.14 | 1698.96 |
| 40.15 | 1976.35 |
| 40.16 | 1664.29 |
| 40.17 | 1889.66 |
| 40.18 | 1664.29 |
| 40.19 | 1456.26 |
| 40.2  | 1907    |
| 40.21 | 1750.97 |
| 40.22 | 1664.29 |
| 40.23 | 1525.6  |
| 40.24 | 1421.58 |
| 40.25 | 1646.96 |
| 40.26 | 1854.99 |
| 40.27 | 1716.3  |
| 40.28 | 1698.96 |
| 40.29 | 1560.27 |
| 40.3  | 1768.31 |
| 40.31 | 1664.29 |
| 40.32 | 1490.93 |
| 40.33 | 1594.95 |
| 40.34 | 1438.92 |
| 40.35 | 1508.26 |
| 40.36 | 1473.59 |
| 40.37 | 1681.63 |
| 40.38 | 1872.33 |
| 40.39 | 1594.95 |
| 40.4  | 1629.62 |
| 40.41 | 1594.95 |
| 40.42 | 1594.95 |
| 40.43 | 1508.26 |

|       |         |
|-------|---------|
| 40.44 | 1750.97 |
| 40.45 | 1334.9  |
| 40.46 | 1716.3  |
| 40.47 | 1421.58 |
| 40.48 | 1629.62 |
| 40.49 | 1733.64 |
| 40.5  | 1733.64 |
| 40.51 | 1542.94 |
| 40.52 | 1612.28 |
| 40.53 | 1612.28 |
| 40.54 | 1490.93 |
| 40.55 | 1698.96 |
| 40.56 | 1542.94 |
| 40.57 | 1664.29 |
| 40.58 | 1733.64 |
| 40.59 | 1629.62 |
| 40.6  | 1490.93 |
| 40.61 | 1525.6  |
| 40.62 | 1577.61 |
| 40.63 | 1577.61 |
| 40.64 | 1750.97 |
| 40.65 | 1889.66 |
| 40.66 | 1386.91 |
| 40.67 | 1473.59 |
| 40.68 | 1542.94 |
| 40.69 | 1473.59 |
| 40.7  | 1594.95 |
| 40.71 | 1473.59 |
| 40.72 | 1560.27 |
| 40.73 | 1664.29 |
| 40.74 | 1456.26 |
| 40.75 | 1560.27 |
| 40.76 | 1594.95 |
| 40.77 | 1664.29 |
| 40.78 | 1733.64 |
| 40.79 | 1473.59 |
| 40.8  | 1508.26 |
| 40.81 | 1456.26 |
| 40.82 | 1525.6  |
| 40.83 | 1854.99 |
| 40.84 | 1646.96 |
| 40.85 | 1646.96 |
| 40.86 | 1542.94 |
| 40.87 | 1646.96 |

|       |         |
|-------|---------|
| 40.88 | 1629.62 |
| 40.89 | 1508.26 |
| 40.9  | 1664.29 |
| 40.91 | 1473.59 |
| 40.92 | 1421.58 |
| 40.93 | 1629.62 |
| 40.94 | 1542.94 |
| 40.95 | 1612.28 |
| 40.96 | 1456.26 |
| 40.97 | 1733.64 |
| 40.98 | 1750.97 |
| 40.99 | 1438.92 |
| 41    | 1646.96 |
| 41.01 | 1300.23 |
| 41.02 | 1646.96 |
| 41.03 | 1750.97 |
| 41.04 | 1733.64 |
| 41.05 | 1438.92 |
| 41.06 | 1508.26 |
| 41.07 | 1612.28 |
| 41.08 | 1369.57 |
| 41.09 | 1508.26 |
| 41.1  | 1369.57 |
| 41.11 | 1265.56 |
| 41.12 | 1525.6  |
| 41.13 | 1508.26 |
| 41.14 | 1508.26 |
| 41.15 | 1698.96 |
| 41.16 | 1508.26 |
| 41.17 | 1681.63 |
| 41.18 | 1490.93 |
| 41.19 | 1629.62 |
| 41.2  | 1681.63 |
| 41.21 | 1490.93 |
| 41.22 | 1421.58 |
| 41.23 | 1750.97 |
| 41.24 | 1542.94 |
| 41.25 | 1681.63 |
| 41.26 | 1872.33 |
| 41.27 | 1612.28 |
| 41.28 | 1733.64 |
| 41.29 | 1612.28 |
| 41.3  | 1698.96 |
| 41.31 | 1594.95 |

|       |         |
|-------|---------|
| 41.32 | 1768.31 |
| 41.33 | 1941.67 |
| 41.34 | 2132.37 |
| 41.35 | 1768.31 |
| 41.36 | 1924.34 |
| 41.37 | 1907    |
| 41.38 | 1941.67 |
| 41.39 | 1560.27 |
| 41.4  | 1716.3  |
| 41.41 | 1750.97 |
| 41.42 | 1560.27 |
| 41.43 | 1698.96 |
| 41.44 | 1508.26 |
| 41.45 | 1750.97 |
| 41.46 | 1594.95 |
| 41.47 | 1664.29 |
| 41.48 | 1716.3  |
| 41.49 | 1594.95 |
| 41.5  | 1560.27 |
| 41.51 | 1733.64 |
| 41.52 | 1473.59 |
| 41.53 | 1404.25 |
| 41.54 | 1577.61 |
| 41.55 | 1733.64 |
| 41.56 | 1577.61 |
| 41.57 | 1907    |
| 41.58 | 1768.31 |
| 41.59 | 1646.96 |
| 41.6  | 1577.61 |
| 41.61 | 1542.94 |
| 41.62 | 1716.3  |
| 41.63 | 1577.61 |
| 41.64 | 1612.28 |
| 41.65 | 1785.65 |
| 41.66 | 1750.97 |
| 41.67 | 1577.61 |
| 41.68 | 1612.28 |
| 41.69 | 1594.95 |
| 41.7  | 1698.96 |
| 41.71 | 1681.63 |
| 41.72 | 1889.66 |
| 41.73 | 2045.69 |
| 41.74 | 1854.99 |
| 41.75 | 1508.26 |



|       |         |
|-------|---------|
| 41.76 | 1750.97 |
| 41.77 | 1768.31 |
| 41.78 | 1768.31 |
| 41.79 | 2063.03 |
| 41.8  | 1750.97 |
| 41.81 | 1664.29 |
| 41.82 | 1542.94 |
| 41.83 | 1820.32 |
| 41.84 | 1993.68 |
| 41.85 | 1542.94 |
| 41.86 | 1733.64 |
| 41.87 | 1733.64 |
| 41.88 | 1820.32 |
| 41.89 | 1768.31 |
| 41.9  | 1560.27 |
| 41.91 | 1629.62 |
| 41.92 | 1629.62 |
| 41.93 | 1733.64 |
| 41.94 | 1716.3  |
| 41.95 | 1577.61 |
| 41.96 | 1872.33 |
| 41.97 | 1698.96 |
| 41.98 | 1802.98 |
| 41.99 | 1924.34 |
| 42    | 1664.29 |
| 42.01 | 1560.27 |
| 42.02 | 1577.61 |
| 42.03 | 1352.24 |
| 42.04 | 1750.97 |
| 42.05 | 1629.62 |
| 42.06 | 1976.35 |
| 42.07 | 1646.96 |
| 42.08 | 1976.35 |
| 42.09 | 1421.58 |
| 42.1  | 1525.6  |
| 42.11 | 1924.34 |
| 42.12 | 1525.6  |
| 42.13 | 1837.66 |
| 42.14 | 1820.32 |
| 42.15 | 1872.33 |
| 42.16 | 1629.62 |
| 42.17 | 1577.61 |
| 42.18 | 1664.29 |
| 42.19 | 1646.96 |

|       |         |
|-------|---------|
| 42.2  | 1629.62 |
| 42.21 | 1820.32 |
| 42.22 | 1959.01 |
| 42.23 | 1820.32 |
| 42.24 | 1785.65 |
| 42.25 | 1837.66 |
| 42.26 | 1889.66 |
| 42.27 | 1612.28 |
| 42.28 | 1716.3  |
| 42.29 | 1802.98 |
| 42.3  | 1941.67 |
| 42.31 | 1369.57 |
| 42.32 | 1750.97 |
| 42.33 | 1508.26 |
| 42.34 | 1907    |
| 42.35 | 1872.33 |
| 42.36 | 1785.65 |
| 42.37 | 1976.35 |
| 42.38 | 1612.28 |
| 42.39 | 1352.24 |
| 42.4  | 1959.01 |
| 42.41 | 1716.3  |
| 42.42 | 2097.7  |
| 42.43 | 2011.02 |
| 42.44 | 1941.67 |
| 42.45 | 2028.36 |
| 42.46 | 1820.32 |
| 42.47 | 2011.02 |
| 42.48 | 1820.32 |
| 42.49 | 1907    |
| 42.5  | 1837.66 |
| 42.51 | 1854.99 |
| 42.52 | 1750.97 |
| 42.53 | 1681.63 |
| 42.54 | 1664.29 |
| 42.55 | 2063.03 |
| 42.56 | 1802.98 |
| 42.57 | 1785.65 |
| 42.58 | 1941.67 |
| 42.59 | 1698.96 |
| 42.6  | 1837.66 |
| 42.61 | 1733.64 |
| 42.62 | 2167.05 |
| 42.63 | 1820.32 |

|       |         |
|-------|---------|
| 42.64 | 1941.67 |
| 42.65 | 2011.02 |
| 42.66 | 1976.35 |
| 42.67 | 2011.02 |
| 42.68 | 2184.38 |
| 42.69 | 1750.97 |
| 42.7  | 1802.98 |
| 42.71 | 2271.06 |
| 42.72 | 2201.72 |
| 42.73 | 2097.7  |
| 42.74 | 2201.72 |
| 42.75 | 2461.76 |
| 42.76 | 2219.06 |
| 42.77 | 1993.68 |
| 42.78 | 2149.71 |
| 42.79 | 2271.06 |
| 42.8  | 2080.36 |
| 42.81 | 2288.4  |
| 42.82 | 2583.12 |
| 42.83 | 2375.08 |
| 42.84 | 2219.06 |
| 42.85 | 2357.75 |
| 42.86 | 2097.7  |
| 42.87 | 2097.7  |
| 42.88 | 2375.08 |
| 42.89 | 2669.8  |
| 42.9  | 2288.4  |
| 42.91 | 2201.72 |
| 42.92 | 2305.74 |
| 42.93 | 2340.41 |
| 42.94 | 2115.04 |
| 42.95 | 2219.06 |
| 42.96 | 2357.75 |
| 42.97 | 2739.15 |
| 42.98 | 2773.82 |
| 42.99 | 3120.55 |
| 43    | 3328.58 |
| 43.01 | 3103.21 |
| 43.02 | 3675.31 |
| 43.03 | 3571.29 |
| 43.04 | 3380.59 |
| 43.05 | 4299.42 |
| 43.06 | 4906.19 |
| 43.07 | 4628.81 |

|       |         |
|-------|---------|
| 43.08 | 5096.89 |
| 43.09 | 5582.31 |
| 43.1  | 6015.72 |
| 43.11 | 6050.39 |
| 43.12 | 6657.17 |
| 43.13 | 7992.07 |
| 43.14 | 8772.2  |
| 43.15 | 10263.1 |
| 43.16 | 10592.5 |
| 43.17 | 13019.6 |
| 43.18 | 15082.6 |
| 43.19 | 16764.3 |
| 43.2  | 20370.2 |
| 43.21 | 21809.2 |
| 43.22 | 25085.7 |
| 43.23 | 27616.8 |
| 43.24 | 31586.9 |
| 43.25 | 32020.3 |
| 43.26 | 32367   |
| 43.27 | 31222.8 |
| 43.28 | 29038.4 |
| 43.29 | 25588.5 |
| 43.3  | 22849.3 |
| 43.31 | 20422.2 |
| 43.32 | 19763.5 |
| 43.33 | 20890.3 |
| 43.34 | 19468.7 |
| 43.35 | 19780.8 |
| 43.36 | 19191.4 |
| 43.37 | 18133.8 |
| 43.38 | 17423.1 |
| 43.39 | 16226.8 |
| 43.4  | 13487.7 |
| 43.41 | 11476.7 |
| 43.42 | 9725.7  |
| 43.43 | 8616.18 |
| 43.44 | 6986.56 |
| 43.45 | 5755.67 |
| 43.46 | 4490.12 |
| 43.47 | 4594.14 |
| 43.48 | 4646.15 |
| 43.49 | 4004.7  |
| 43.5  | 3640.64 |
| 43.51 | 3553.96 |

|       |         |
|-------|---------|
| 43.52 | 3380.59 |
| 43.53 | 3033.86 |
| 43.54 | 3155.22 |
| 43.55 | 2756.48 |
| 43.56 | 2791.16 |
| 43.57 | 3120.55 |
| 43.58 | 2912.51 |
| 43.59 | 2739.15 |
| 43.6  | 2739.15 |
| 43.61 | 2427.09 |
| 43.62 | 2721.81 |
| 43.63 | 2513.77 |
| 43.64 | 2097.7  |
| 43.65 | 2756.48 |
| 43.66 | 2427.09 |
| 43.67 | 2236.39 |
| 43.68 | 2340.41 |
| 43.69 | 2305.74 |
| 43.7  | 2392.42 |
| 43.71 | 2409.76 |
| 43.72 | 1993.68 |
| 43.73 | 2097.7  |
| 43.74 | 2149.71 |
| 43.75 | 1941.67 |
| 43.76 | 2149.71 |
| 43.77 | 1907    |
| 43.78 | 1889.66 |
| 43.79 | 1872.33 |
| 43.8  | 2253.73 |
| 43.81 | 1889.66 |
| 43.82 | 1820.32 |
| 43.83 | 1698.96 |
| 43.84 | 1733.64 |
| 43.85 | 1837.66 |
| 43.86 | 1612.28 |
| 43.87 | 1924.34 |
| 43.88 | 2097.7  |
| 43.89 | 1733.64 |
| 43.9  | 1577.61 |
| 43.91 | 1681.63 |
| 43.92 | 1976.35 |
| 43.93 | 1716.3  |
| 43.94 | 1646.96 |
| 43.95 | 1768.31 |

|       |         |
|-------|---------|
| 43.96 | 1646.96 |
| 43.97 | 1750.97 |
| 43.98 | 1698.96 |
| 43.99 | 1508.26 |
| 44    | 1404.25 |
| 44.01 | 1802.98 |
| 44.02 | 1802.98 |
| 44.03 | 1508.26 |
| 44.04 | 1716.3  |
| 44.05 | 1716.3  |
| 44.06 | 1750.97 |
| 44.07 | 1681.63 |
| 44.08 | 1525.6  |
| 44.09 | 1646.96 |
| 44.1  | 1438.92 |
| 44.11 | 1785.65 |
| 44.12 | 1854.99 |
| 44.13 | 1768.31 |
| 44.14 | 1854.99 |
| 44.15 | 1664.29 |
| 44.16 | 1334.9  |
| 44.17 | 1681.63 |
| 44.18 | 1785.65 |
| 44.19 | 1924.34 |
| 44.2  | 1525.6  |
| 44.21 | 1560.27 |
| 44.22 | 1404.25 |
| 44.23 | 1334.9  |
| 44.24 | 1629.62 |
| 44.25 | 1629.62 |
| 44.26 | 1542.94 |
| 44.27 | 1681.63 |
| 44.28 | 1594.95 |
| 44.29 | 1352.24 |
| 44.3  | 1334.9  |
| 44.31 | 1577.61 |
| 44.32 | 1664.29 |
| 44.33 | 1872.33 |
| 44.34 | 1629.62 |
| 44.35 | 1612.28 |
| 44.36 | 1473.59 |
| 44.37 | 1594.95 |
| 44.38 | 1820.32 |
| 44.39 | 1716.3  |

|       |         |
|-------|---------|
| 44.4  | 1542.94 |
| 44.41 | 1594.95 |
| 44.42 | 1716.3  |
| 44.43 | 1750.97 |
| 44.44 | 1525.6  |
| 44.45 | 1664.29 |
| 44.46 | 1508.26 |
| 44.47 | 1421.58 |
| 44.48 | 1508.26 |
| 44.49 | 1404.25 |
| 44.5  | 1542.94 |
| 44.51 | 1698.96 |
| 44.52 | 1438.92 |
| 44.53 | 1369.57 |
| 44.54 | 1508.26 |
| 44.55 | 1490.93 |
| 44.56 | 1664.29 |
| 44.57 | 1508.26 |
| 44.58 | 1750.97 |
| 44.59 | 1577.61 |
| 44.6  | 1490.93 |
| 44.61 | 1629.62 |
| 44.62 | 1577.61 |
| 44.63 | 1456.26 |
| 44.64 | 1681.63 |
| 44.65 | 1421.58 |
| 44.66 | 1456.26 |
| 44.67 | 1542.94 |
| 44.68 | 1438.92 |
| 44.69 | 1508.26 |
| 44.7  | 1664.29 |
| 44.71 | 1508.26 |
| 44.72 | 1386.91 |
| 44.73 | 1646.96 |
| 44.74 | 1681.63 |
| 44.75 | 1664.29 |
| 44.76 | 1629.62 |
| 44.77 | 1889.66 |
| 44.78 | 1750.97 |
| 44.79 | 1716.3  |
| 44.8  | 1577.61 |
| 44.81 | 1560.27 |
| 44.82 | 1473.59 |
| 44.83 | 1820.32 |

|       |         |
|-------|---------|
| 44.84 | 1646.96 |
| 44.85 | 1248.22 |
| 44.86 | 1525.6  |
| 44.87 | 1716.3  |
| 44.88 | 1837.66 |
| 44.89 | 1646.96 |
| 44.9  | 1560.27 |
| 44.91 | 1525.6  |
| 44.92 | 1646.96 |
| 44.93 | 1612.28 |
| 44.94 | 1750.97 |
| 44.95 | 1612.28 |
| 44.96 | 1473.59 |
| 44.97 | 1664.29 |
| 44.98 | 1629.62 |
| 44.99 | 1525.6  |
| 45    | 1542.94 |
| 45.01 | 1629.62 |
| 45.02 | 1577.61 |
| 45.03 | 1716.3  |
| 45.04 | 1473.59 |
| 45.05 | 1594.95 |
| 45.06 | 1542.94 |
| 45.07 | 1629.62 |
| 45.08 | 1490.93 |
| 45.09 | 1646.96 |
| 45.1  | 1612.28 |
| 45.11 | 1594.95 |
| 45.12 | 1560.27 |
| 45.13 | 1317.56 |
| 45.14 | 1629.62 |
| 45.15 | 1612.28 |
| 45.16 | 1473.59 |
| 45.17 | 1577.61 |
| 45.18 | 1837.66 |
| 45.19 | 1750.97 |
| 45.2  | 1646.96 |
| 45.21 | 1612.28 |
| 45.22 | 1438.92 |
| 45.23 | 1490.93 |
| 45.24 | 1802.98 |
| 45.25 | 1473.59 |
| 45.26 | 1698.96 |
| 45.27 | 1872.33 |



|       |         |
|-------|---------|
| 45.28 | 1750.97 |
| 45.29 | 1959.01 |
| 45.3  | 1750.97 |
| 45.31 | 1854.99 |
| 45.32 | 1681.63 |
| 45.33 | 1456.26 |
| 45.34 | 1750.97 |
| 45.35 | 1872.33 |
| 45.36 | 1282.89 |
| 45.37 | 1594.95 |
| 45.38 | 1854.99 |
| 45.39 | 1872.33 |
| 45.4  | 1577.61 |
| 45.41 | 1473.59 |
| 45.42 | 1560.27 |
| 45.43 | 1820.32 |
| 45.44 | 1993.68 |
| 45.45 | 1560.27 |
| 45.46 | 1802.98 |
| 45.47 | 1473.59 |
| 45.48 | 1698.96 |
| 45.49 | 1802.98 |
| 45.5  | 1716.3  |
| 45.51 | 1854.99 |
| 45.52 | 1941.67 |
| 45.53 | 2149.71 |
| 45.54 | 1820.32 |
| 45.55 | 1976.35 |
| 45.56 | 2115.04 |
| 45.57 | 2063.03 |
| 45.58 | 1820.32 |
| 45.59 | 1664.29 |
| 45.6  | 1907    |
| 45.61 | 1733.64 |
| 45.62 | 1820.32 |
| 45.63 | 1733.64 |
| 45.64 | 1612.28 |
| 45.65 | 1542.94 |
| 45.66 | 1629.62 |
| 45.67 | 1542.94 |
| 45.68 | 1959.01 |
| 45.69 | 1664.29 |
| 45.7  | 1490.93 |
| 45.71 | 1594.95 |

|       |         |
|-------|---------|
| 45.72 | 1577.61 |
| 45.73 | 1646.96 |
| 45.74 | 1889.66 |
| 45.75 | 1664.29 |
| 45.76 | 1352.24 |
| 45.77 | 1282.89 |
| 45.78 | 1456.26 |
| 45.79 | 1542.94 |
| 45.8  | 1594.95 |
| 45.81 | 1837.66 |
| 45.82 | 1577.61 |
| 45.83 | 1594.95 |
| 45.84 | 1681.63 |
| 45.85 | 1681.63 |
| 45.86 | 1733.64 |
| 45.87 | 1542.94 |
| 45.88 | 1941.67 |
| 45.89 | 1629.62 |
| 45.9  | 1490.93 |
| 45.91 | 1560.27 |
| 45.92 | 1560.27 |
| 45.93 | 1820.32 |
| 45.94 | 1907    |
| 45.95 | 1993.68 |
| 45.96 | 1854.99 |
| 45.97 | 1681.63 |
| 45.98 | 1386.91 |
| 45.99 | 1560.27 |
| 46    | 1612.28 |
| 46.01 | 1907    |
| 46.02 | 1802.98 |
| 46.03 | 1976.35 |
| 46.04 | 1820.32 |
| 46.05 | 1681.63 |
| 46.06 | 1681.63 |
| 46.07 | 1646.96 |
| 46.08 | 1698.96 |
| 46.09 | 1490.93 |
| 46.1  | 1594.95 |
| 46.11 | 1802.98 |
| 46.12 | 1490.93 |
| 46.13 | 1594.95 |
| 46.14 | 1907    |
| 46.15 | 1750.97 |

|       |         |
|-------|---------|
| 46.16 | 2080.36 |
| 46.17 | 2011.02 |
| 46.18 | 1959.01 |
| 46.19 | 1646.96 |
| 46.2  | 1907    |
| 46.21 | 1854.99 |
| 46.22 | 1560.27 |
| 46.23 | 1698.96 |
| 46.24 | 1438.92 |
| 46.25 | 1560.27 |
| 46.26 | 1976.35 |
| 46.27 | 1837.66 |
| 46.28 | 1508.26 |
| 46.29 | 1698.96 |
| 46.3  | 1993.68 |
| 46.31 | 1560.27 |
| 46.32 | 1560.27 |
| 46.33 | 1733.64 |
| 46.34 | 1612.28 |
| 46.35 | 1456.26 |
| 46.36 | 1768.31 |
| 46.37 | 1924.34 |
| 46.38 | 1716.3  |
| 46.39 | 1837.66 |
| 46.4  | 1907    |
| 46.41 | 1698.96 |
| 46.42 | 1837.66 |
| 46.43 | 1854.99 |
| 46.44 | 1837.66 |
| 46.45 | 1750.97 |
| 46.46 | 1768.31 |
| 46.47 | 1872.33 |
| 46.48 | 1924.34 |
| 46.49 | 1837.66 |
| 46.5  | 1768.31 |
| 46.51 | 1976.35 |
| 46.52 | 1941.67 |
| 46.53 | 1629.62 |
| 46.54 | 1542.94 |
| 46.55 | 1802.98 |
| 46.56 | 1872.33 |
| 46.57 | 1820.32 |
| 46.58 | 1889.66 |
| 46.59 | 1698.96 |

|       |         |
|-------|---------|
| 46.6  | 1837.66 |
| 46.61 | 1837.66 |
| 46.62 | 1456.26 |
| 46.63 | 1959.01 |
| 46.64 | 1733.64 |
| 46.65 | 1733.64 |
| 46.66 | 2028.36 |
| 46.67 | 1837.66 |
| 46.68 | 1820.32 |
| 46.69 | 2028.36 |
| 46.7  | 1785.65 |
| 46.71 | 1785.65 |
| 46.72 | 2063.03 |
| 46.73 | 2236.39 |
| 46.74 | 1785.65 |
| 46.75 | 1872.33 |
| 46.76 | 2097.7  |
| 46.77 | 2080.36 |
| 46.78 | 2028.36 |
| 46.79 | 1907    |
| 46.8  | 2011.02 |
| 46.81 | 2219.06 |
| 46.82 | 2271.06 |
| 46.83 | 2288.4  |
| 46.84 | 2115.04 |
| 46.85 | 2201.72 |
| 46.86 | 2219.06 |
| 46.87 | 2305.74 |
| 46.88 | 2028.36 |
| 46.89 | 2375.08 |
| 46.9  | 2513.77 |
| 46.91 | 2357.75 |
| 46.92 | 2513.77 |
| 46.93 | 2496.44 |
| 46.94 | 2427.09 |
| 46.95 | 2600.46 |
| 46.96 | 2635.13 |
| 46.97 | 2617.79 |
| 46.98 | 3120.55 |
| 46.99 | 3068.54 |
| 47    | 2756.48 |
| 47.01 | 2929.85 |
| 47.02 | 3519.28 |
| 47.03 | 3883.35 |

|       |         |
|-------|---------|
| 47.04 | 3796.67 |
| 47.05 | 4126.06 |
| 47.06 | 4230.07 |
| 47.07 | 4732.83 |
| 47.08 | 5148.9  |
| 47.09 | 5148.9  |
| 47.1  | 6015.72 |
| 47.11 | 5894.37 |
| 47.12 | 6483.8  |
| 47.13 | 7558.66 |
| 47.14 | 8581.5  |
| 47.15 | 9240.29 |
| 47.16 | 10159.1 |
| 47.17 | 10852.6 |
| 47.18 | 12222.1 |
| 47.19 | 12464.9 |
| 47.2  | 12846.3 |
| 47.21 | 13609.1 |
| 47.22 | 12724.9 |
| 47.23 | 12516.9 |
| 47.24 | 11025.9 |
| 47.25 | 10921.9 |
| 47.26 | 10713.9 |
| 47.27 | 10228.5 |
| 47.28 | 10228.5 |
| 47.29 | 10436.5 |
| 47.3  | 10055.1 |
| 47.31 | 10505.8 |
| 47.32 | 10020.4 |
| 47.33 | 10280.5 |
| 47.34 | 10055.1 |
| 47.35 | 10280.5 |
| 47.36 | 9656.36 |
| 47.37 | 9500.33 |
| 47.38 | 9829.72 |
| 47.39 | 10193.8 |
| 47.4  | 9170.94 |
| 47.41 | 9500.33 |
| 47.42 | 10159.1 |
| 47.43 | 11511.3 |
| 47.44 | 11338   |
| 47.45 | 11788.7 |
| 47.46 | 13210.3 |
| 47.47 | 15862.8 |

|       |         |
|-------|---------|
| 47.48 | 16816.3 |
| 47.49 | 18532.6 |
| 47.5  | 20786.3 |
| 47.51 | 22519.9 |
| 47.52 | 26108.6 |
| 47.53 | 28882.4 |
| 47.54 | 32575   |
| 47.55 | 34603.4 |
| 47.56 | 37671.9 |
| 47.57 | 41503.3 |
| 47.58 | 42716.8 |
| 47.59 | 43410.3 |
| 47.6  | 41555.3 |
| 47.61 | 39578.9 |
| 47.62 | 36683.8 |
| 47.63 | 34066   |
| 47.64 | 31708.2 |
| 47.65 | 29437.2 |
| 47.66 | 27270.1 |
| 47.67 | 26004.6 |
| 47.68 | 25449.8 |
| 47.69 | 24739   |
| 47.7  | 26316.6 |
| 47.71 | 24635   |
| 47.72 | 24357.6 |
| 47.73 | 22745.3 |
| 47.74 | 20075.5 |
| 47.75 | 17977.8 |
| 47.76 | 15308   |
| 47.77 | 13123.6 |
| 47.78 | 11216.6 |
| 47.79 | 10072.4 |
| 47.8  | 8616.18 |
| 47.81 | 7836.04 |
| 47.82 | 7073.24 |
| 47.83 | 6518.48 |
| 47.84 | 5686.33 |
| 47.85 | 4958.2  |
| 47.86 | 5114.23 |
| 47.87 | 4680.82 |
| 47.88 | 4091.38 |
| 47.89 | 4264.75 |
| 47.9  | 4091.38 |
| 47.91 | 3415.26 |

|       |         |
|-------|---------|
| 47.92 | 3640.64 |
| 47.93 | 3900.68 |
| 47.94 | 3536.62 |
| 47.95 | 3467.27 |
| 47.96 | 3068.54 |
| 47.97 | 3155.22 |
| 47.98 | 2825.83 |
| 47.99 | 2773.82 |
| 48    | 2877.84 |
| 48.01 | 2912.51 |
| 48.02 | 2739.15 |
| 48.03 | 2600.46 |
| 48.04 | 2583.12 |
| 48.05 | 2860.5  |
| 48.06 | 2895.17 |
| 48.07 | 2791.16 |
| 48.08 | 2635.13 |
| 48.09 | 2739.15 |
| 48.1  | 2496.44 |
| 48.11 | 2981.86 |
| 48.12 | 2791.16 |
| 48.13 | 2219.06 |
| 48.14 | 2513.77 |
| 48.15 | 2409.76 |
| 48.16 | 2981.86 |
| 48.17 | 2739.15 |
| 48.18 | 2513.77 |
| 48.19 | 2375.08 |
| 48.2  | 2513.77 |
| 48.21 | 2981.86 |
| 48.22 | 2479.1  |
| 48.23 | 2912.51 |
| 48.24 | 2721.81 |
| 48.25 | 3137.88 |
| 48.26 | 3137.88 |
| 48.27 | 3051.2  |
| 48.28 | 3068.54 |
| 48.29 | 2912.51 |
| 48.3  | 3571.29 |
| 48.31 | 3536.62 |
| 48.32 | 3692.65 |
| 48.33 | 4524.79 |
| 48.34 | 4282.08 |
| 48.35 | 4420.77 |

|       |         |
|-------|---------|
| 48.36 | 4767.5  |
| 48.37 | 4992.87 |
| 48.38 | 5668.99 |
| 48.39 | 5183.57 |
| 48.4  | 5512.97 |
| 48.41 | 6691.84 |
| 48.42 | 7523.98 |
| 48.43 | 8130.76 |
| 48.44 | 9049.58 |
| 48.45 | 9777.71 |
| 48.46 | 10921.9 |
| 48.47 | 12048.8 |
| 48.48 | 12672.9 |
| 48.49 | 13990.5 |
| 48.5  | 16972.3 |
| 48.51 | 18601.9 |
| 48.52 | 21757.1 |
| 48.53 | 23958.9 |
| 48.54 | 28778.4 |
| 48.55 | 31656.2 |
| 48.56 | 33545.9 |
| 48.57 | 37134.5 |
| 48.58 | 39700.3 |
| 48.59 | 39804.3 |
| 48.6  | 38798.8 |
| 48.61 | 39596.3 |
| 48.62 | 36146.3 |
| 48.63 | 32731.1 |
| 48.64 | 29627.9 |
| 48.65 | 26281.9 |
| 48.66 | 24964.4 |
| 48.67 | 23369.4 |
| 48.68 | 23456.1 |
| 48.69 | 24080.2 |
| 48.7  | 24080.2 |
| 48.71 | 23473.4 |
| 48.72 | 23109.4 |
| 48.73 | 22554.6 |
| 48.74 | 21601.1 |
| 48.75 | 18497.9 |
| 48.76 | 16244.2 |
| 48.77 | 13470.4 |
| 48.78 | 11182   |
| 48.79 | 10055.1 |



|       |         |
|-------|---------|
| 48.8  | 9049.58 |
| 48.81 | 7385.29 |
| 48.82 | 6795.86 |
| 48.83 | 6553.15 |
| 48.84 | 5287.59 |
| 48.85 | 4732.83 |
| 48.86 | 4732.83 |
| 48.87 | 4403.44 |
| 48.88 | 3657.97 |
| 48.89 | 3484.61 |
| 48.9  | 3328.58 |
| 48.91 | 3363.26 |
| 48.92 | 3432.6  |
| 48.93 | 3085.87 |
| 48.94 | 2981.86 |
| 48.95 | 2860.5  |
| 48.96 | 2548.45 |
| 48.97 | 2444.43 |
| 48.98 | 2357.75 |
| 48.99 | 2496.44 |
| 49    | 2167.05 |
| 49.01 | 2201.72 |
| 49.02 | 2115.04 |
| 49.03 | 2375.08 |
| 49.04 | 2375.08 |
| 49.05 | 2305.74 |
| 49.06 | 2011.02 |
| 49.07 | 1872.33 |
| 49.08 | 2253.73 |
| 49.09 | 2444.43 |
| 49.1  | 2219.06 |
| 49.11 | 2184.38 |
| 49.12 | 1837.66 |
| 49.13 | 1820.32 |
| 49.14 | 2097.7  |
| 49.15 | 2011.02 |
| 49.16 | 2045.69 |
| 49.17 | 1941.67 |
| 49.18 | 1993.68 |
| 49.19 | 1941.67 |
| 49.2  | 1889.66 |
| 49.21 | 1976.35 |
| 49.22 | 1959.01 |
| 49.23 | 1716.3  |

|       |         |
|-------|---------|
| 49.24 | 2097.7  |
| 49.25 | 1907    |
| 49.26 | 2080.36 |
| 49.27 | 2115.04 |
| 49.28 | 1750.97 |
| 49.29 | 2045.69 |
| 49.3  | 2028.36 |
| 49.31 | 1750.97 |
| 49.32 | 1907    |
| 49.33 | 1785.65 |
| 49.34 | 1594.95 |
| 49.35 | 1802.98 |
| 49.36 | 1646.96 |
| 49.37 | 1612.28 |
| 49.38 | 1542.94 |
| 49.39 | 1369.57 |
| 49.4  | 1716.3  |
| 49.41 | 1785.65 |
| 49.42 | 1872.33 |
| 49.43 | 1889.66 |
| 49.44 | 1560.27 |
| 49.45 | 1802.98 |
| 49.46 | 1629.62 |
| 49.47 | 1768.31 |
| 49.48 | 1698.96 |
| 49.49 | 1664.29 |
| 49.5  | 1924.34 |
| 49.51 | 1525.6  |
| 49.52 | 1525.6  |
| 49.53 | 1785.65 |
| 49.54 | 1508.26 |
| 49.55 | 1508.26 |
| 49.56 | 1907    |
| 49.57 | 1716.3  |
| 49.58 | 1438.92 |
| 49.59 | 1733.64 |
| 49.6  | 1490.93 |
| 49.61 | 1820.32 |
| 49.62 | 1438.92 |
| 49.63 | 1542.94 |
| 49.64 | 1612.28 |
| 49.65 | 1802.98 |
| 49.66 | 1438.92 |
| 49.67 | 1542.94 |

|       |         |
|-------|---------|
| 49.68 | 1473.59 |
| 49.69 | 1664.29 |
| 49.7  | 1525.6  |
| 49.71 | 1854.99 |
| 49.72 | 1664.29 |
| 49.73 | 1317.56 |
| 49.74 | 1681.63 |
| 49.75 | 1490.93 |
| 49.76 | 1473.59 |
| 49.77 | 1716.3  |
| 49.78 | 1456.26 |
| 49.79 | 1438.92 |
| 49.8  | 1560.27 |
| 49.81 | 1560.27 |
| 49.82 | 1594.95 |
| 49.83 | 1681.63 |
| 49.84 | 1525.6  |
| 49.85 | 1733.64 |
| 49.86 | 1802.98 |
| 49.87 | 1404.25 |
| 49.88 | 1560.27 |
| 49.89 | 1282.89 |
| 49.9  | 1577.61 |
| 49.91 | 1560.27 |
| 49.92 | 1802.98 |
| 49.93 | 1421.58 |
| 49.94 | 1352.24 |
| 49.95 | 1490.93 |
| 49.96 | 1438.92 |
| 49.97 | 1508.26 |
| 49.98 | 1178.87 |
| 49.99 | 1525.6  |
| 50    | 1456.26 |
| 50.01 | 1265.56 |
| 50.02 | 1282.89 |
| 50.03 | 1352.24 |
| 50.04 | 1560.27 |
| 50.05 | 1369.57 |
| 50.06 | 1196.21 |
| 50.07 | 1525.6  |
| 50.08 | 1508.26 |
| 50.09 | 1473.59 |
| 50.1  | 1629.62 |
| 50.11 | 1490.93 |

|       |         |
|-------|---------|
| 50.12 | 1577.61 |
| 50.13 | 1508.26 |
| 50.14 | 1386.91 |
| 50.15 | 1404.25 |
| 50.16 | 1317.56 |
| 50.17 | 1508.26 |
| 50.18 | 1456.26 |
| 50.19 | 1005.51 |
| 50.2  | 1282.89 |
| 50.21 | 1456.26 |
| 50.22 | 1334.9  |
| 50.23 | 1386.91 |
| 50.24 | 1300.23 |
| 50.25 | 1525.6  |
| 50.26 | 1369.57 |
| 50.27 | 1542.94 |
| 50.28 | 1525.6  |
| 50.29 | 1542.94 |
| 50.3  | 1612.28 |
| 50.31 | 1161.54 |
| 50.32 | 1456.26 |
| 50.33 | 1525.6  |
| 50.34 | 1248.22 |
| 50.35 | 1594.95 |
| 50.36 | 1230.88 |
| 50.37 | 1334.9  |
| 50.38 | 1300.23 |
| 50.39 | 1508.26 |
| 50.4  | 1560.27 |
| 50.41 | 1698.96 |
| 50.42 | 1317.56 |
| 50.43 | 1265.56 |
| 50.44 | 1490.93 |
| 50.45 | 1109.53 |
| 50.46 | 1352.24 |
| 50.47 | 1421.58 |
| 50.48 | 1421.58 |
| 50.49 | 1092.19 |
| 50.5  | 1508.26 |
| 50.51 | 1456.26 |
| 50.52 | 1421.58 |
| 50.53 | 1317.56 |
| 50.54 | 1369.57 |
| 50.55 | 1230.88 |

|       |         |
|-------|---------|
| 50.56 | 1386.91 |
| 50.57 | 1577.61 |
| 50.58 | 1334.9  |
| 50.59 | 1612.28 |
| 50.6  | 1300.23 |
| 50.61 | 1629.62 |
| 50.62 | 1386.91 |
| 50.63 | 1664.29 |
| 50.64 | 1317.56 |
| 50.65 | 1438.92 |
| 50.66 | 1456.26 |
| 50.67 | 1456.26 |
| 50.68 | 1404.25 |
| 50.69 | 1282.89 |
| 50.7  | 1698.96 |
| 50.71 | 1490.93 |
| 50.72 | 1144.2  |
| 50.73 | 1265.56 |
| 50.74 | 1421.58 |
| 50.75 | 1542.94 |
| 50.76 | 1282.89 |
| 50.77 | 1646.96 |
| 50.78 | 1265.56 |
| 50.79 | 1421.58 |
| 50.8  | 1404.25 |
| 50.81 | 1369.57 |
| 50.82 | 1629.62 |
| 50.83 | 1508.26 |
| 50.84 | 1334.9  |
| 50.85 | 1525.6  |
| 50.86 | 1248.22 |
| 50.87 | 1560.27 |
| 50.88 | 1560.27 |
| 50.89 | 1646.96 |
| 50.9  | 1646.96 |
| 50.91 | 1733.64 |
| 50.92 | 1456.26 |
| 50.93 | 1456.26 |
| 50.94 | 1473.59 |
| 50.95 | 1334.9  |
| 50.96 | 1161.54 |
| 50.97 | 1265.56 |
| 50.98 | 1404.25 |
| 50.99 | 1577.61 |

|       |         |
|-------|---------|
| 51    | 1456.26 |
| 51.01 | 1612.28 |
| 51.02 | 1178.87 |
| 51.03 | 1265.56 |
| 51.04 | 1213.55 |
| 51.05 | 1161.54 |
| 51.06 | 1456.26 |
| 51.07 | 1542.94 |
| 51.08 | 1490.93 |
| 51.09 | 1317.56 |
| 51.1  | 1490.93 |
| 51.11 | 1213.55 |
| 51.12 | 1577.61 |
| 51.13 | 1438.92 |
| 51.14 | 1178.87 |
| 51.15 | 1161.54 |
| 51.16 | 1109.53 |
| 51.17 | 1230.88 |
| 51.18 | 1404.25 |
| 51.19 | 1074.85 |
| 51.2  | 1629.62 |
| 51.21 | 1178.87 |
| 51.22 | 1282.89 |
| 51.23 | 1178.87 |
| 51.24 | 1421.58 |
| 51.25 | 1161.54 |
| 51.26 | 1508.26 |
| 51.27 | 1577.61 |
| 51.28 | 1421.58 |
| 51.29 | 1404.25 |
| 51.3  | 1178.87 |
| 51.31 | 1317.56 |
| 51.32 | 1438.92 |
| 51.33 | 1629.62 |
| 51.34 | 1577.61 |
| 51.35 | 1317.56 |
| 51.36 | 1542.94 |
| 51.37 | 1577.61 |
| 51.38 | 1542.94 |
| 51.39 | 1733.64 |
| 51.4  | 1230.88 |
| 51.41 | 1317.56 |
| 51.42 | 1456.26 |
| 51.43 | 1352.24 |

|       |         |
|-------|---------|
| 51.44 | 1386.91 |
| 51.45 | 1369.57 |
| 51.46 | 1404.25 |
| 51.47 | 1230.88 |
| 51.48 | 1317.56 |
| 51.49 | 1542.94 |
| 51.5  | 1542.94 |
| 51.51 | 1490.93 |
| 51.52 | 1594.95 |
| 51.53 | 1369.57 |
| 51.54 | 1733.64 |
| 51.55 | 1508.26 |
| 51.56 | 1473.59 |
| 51.57 | 1334.9  |
| 51.58 | 1317.56 |
| 51.59 | 1126.86 |
| 51.6  | 1230.88 |
| 51.61 | 1369.57 |
| 51.62 | 1126.86 |
| 51.63 | 1369.57 |
| 51.64 | 1282.89 |
| 51.65 | 1352.24 |
| 51.66 | 1369.57 |
| 51.67 | 1369.57 |
| 51.68 | 1438.92 |
| 51.69 | 1577.61 |
| 51.7  | 1612.28 |
| 51.71 | 1334.9  |
| 51.72 | 1525.6  |
| 51.73 | 1092.19 |
| 51.74 | 1265.56 |
| 51.75 | 1456.26 |
| 51.76 | 1473.59 |
| 51.77 | 1109.53 |
| 51.78 | 1473.59 |
| 51.79 | 1542.94 |
| 51.8  | 1594.95 |
| 51.81 | 1785.65 |
| 51.82 | 1456.26 |
| 51.83 | 1092.19 |
| 51.84 | 1733.64 |
| 51.85 | 1438.92 |
| 51.86 | 1282.89 |
| 51.87 | 1490.93 |

|       |         |
|-------|---------|
| 51.88 | 1473.59 |
| 51.89 | 1230.88 |
| 51.9  | 1369.57 |
| 51.91 | 1161.54 |
| 51.92 | 1317.56 |
| 51.93 | 1404.25 |
| 51.94 | 1664.29 |
| 51.95 | 1300.23 |
| 51.96 | 1456.26 |
| 51.97 | 1265.56 |
| 51.98 | 1300.23 |
| 51.99 | 1404.25 |
| 52    | 1282.89 |
| 52.01 | 1907    |
| 52.02 | 1369.57 |
| 52.03 | 1196.21 |
| 52.04 | 1456.26 |
| 52.05 | 1196.21 |
| 52.06 | 1525.6  |
| 52.07 | 1282.89 |
| 52.08 | 1126.86 |
| 52.09 | 1473.59 |
| 52.1  | 1542.94 |
| 52.11 | 1126.86 |
| 52.12 | 1386.91 |
| 52.13 | 1196.21 |
| 52.14 | 1178.87 |
| 52.15 | 1386.91 |
| 52.16 | 1161.54 |
| 52.17 | 1178.87 |
| 52.18 | 1421.58 |
| 52.19 | 1438.92 |
| 52.2  | 1144.2  |
| 52.21 | 1248.22 |
| 52.22 | 1369.57 |
| 52.23 | 988.173 |
| 52.24 | 1178.87 |
| 52.25 | 1265.56 |
| 52.26 | 1092.19 |
| 52.27 | 1230.88 |
| 52.28 | 1438.92 |
| 52.29 | 1126.86 |
| 52.3  | 1040.18 |
| 52.31 | 1421.58 |



|       |         |
|-------|---------|
| 52.32 | 1248.22 |
| 52.33 | 1057.52 |
| 52.34 | 1109.53 |
| 52.35 | 1248.22 |
| 52.36 | 1230.88 |
| 52.37 | 1161.54 |
| 52.38 | 1369.57 |
| 52.39 | 1213.55 |
| 52.4  | 1109.53 |
| 52.41 | 1317.56 |
| 52.42 | 1230.88 |
| 52.43 | 1213.55 |
| 52.44 | 988.173 |
| 52.45 | 1161.54 |
| 52.46 | 1352.24 |
| 52.47 | 1005.51 |
| 52.48 | 1092.19 |
| 52.49 | 1369.57 |
| 52.5  | 1022.85 |
| 52.51 | 1178.87 |
| 52.52 | 1352.24 |
| 52.53 | 1404.25 |
| 52.54 | 1577.61 |
| 52.55 | 1161.54 |
| 52.56 | 1161.54 |
| 52.57 | 1074.85 |
| 52.58 | 1126.86 |
| 52.59 | 1109.53 |
| 52.6  | 1092.19 |
| 52.61 | 1282.89 |
| 52.62 | 1196.21 |
| 52.63 | 1213.55 |
| 52.64 | 1248.22 |
| 52.65 | 1092.19 |
| 52.66 | 1161.54 |
| 52.67 | 1282.89 |
| 52.68 | 1490.93 |
| 52.69 | 1057.52 |
| 52.7  | 1230.88 |
| 52.71 | 1196.21 |
| 52.72 | 1126.86 |
| 52.73 | 1317.56 |
| 52.74 | 1248.22 |
| 52.75 | 1300.23 |

|       |         |
|-------|---------|
| 52.76 | 1213.55 |
| 52.77 | 970.837 |
| 52.78 | 1230.88 |
| 52.79 | 1369.57 |
| 52.8  | 936.164 |
| 52.81 | 1265.56 |
| 52.82 | 1248.22 |
| 52.83 | 1248.22 |
| 52.84 | 1213.55 |
| 52.85 | 1248.22 |
| 52.86 | 988.173 |
| 52.87 | 1022.85 |
| 52.88 | 1300.23 |
| 52.89 | 988.173 |
| 52.9  | 1092.19 |
| 52.91 | 1092.19 |
| 52.92 | 1109.53 |
| 52.93 | 1040.18 |
| 52.94 | 1074.85 |
| 52.95 | 1144.2  |
| 52.96 | 1161.54 |
| 52.97 | 1161.54 |
| 52.98 | 1334.9  |
| 52.99 | 1230.88 |
| 53    | 1213.55 |
| 53.01 | 1109.53 |
| 53.02 | 1213.55 |
| 53.03 | 1092.19 |
| 53.04 | 1265.56 |
| 53.05 | 988.173 |
| 53.06 | 1005.51 |
| 53.07 | 1040.18 |
| 53.08 | 1126.86 |
| 53.09 | 1248.22 |
| 53.1  | 1126.86 |
| 53.11 | 1126.86 |
| 53.12 | 1386.91 |
| 53.13 | 1213.55 |
| 53.14 | 1438.92 |
| 53.15 | 1300.23 |
| 53.16 | 1126.86 |
| 53.17 | 1057.52 |
| 53.18 | 1196.21 |
| 53.19 | 1074.85 |

|       |         |
|-------|---------|
| 53.2  | 1161.54 |
| 53.21 | 1213.55 |
| 53.22 | 884.155 |
| 53.23 | 1040.18 |
| 53.24 | 1230.88 |
| 53.25 | 1248.22 |
| 53.26 | 988.173 |
| 53.27 | 1022.85 |
| 53.28 | 1144.2  |
| 53.29 | 1178.87 |
| 53.3  | 1352.24 |
| 53.31 | 1282.89 |
| 53.32 | 1248.22 |
| 53.33 | 1265.56 |
| 53.34 | 1265.56 |
| 53.35 | 1161.54 |
| 53.36 | 1525.6  |
| 53.37 | 1300.23 |
| 53.38 | 970.837 |
| 53.39 | 1282.89 |
| 53.4  | 1161.54 |
| 53.41 | 1057.52 |
| 53.42 | 1144.2  |
| 53.43 | 1005.51 |
| 53.44 | 1040.18 |
| 53.45 | 1369.57 |
| 53.46 | 1265.56 |
| 53.47 | 1074.85 |
| 53.48 | 970.837 |
| 53.49 | 1161.54 |
| 53.5  | 1213.55 |
| 53.51 | 1196.21 |
| 53.52 | 1161.54 |
| 53.53 | 1144.2  |
| 53.54 | 1092.19 |
| 53.55 | 1126.86 |
| 53.56 | 1022.85 |
| 53.57 | 1092.19 |
| 53.58 | 1040.18 |
| 53.59 | 1074.85 |
| 53.6  | 1230.88 |
| 53.61 | 1040.18 |
| 53.62 | 1230.88 |
| 53.63 | 1074.85 |

|       |         |
|-------|---------|
| 53.64 | 1265.56 |
| 53.65 | 1386.91 |
| 53.66 | 1040.18 |
| 53.67 | 1352.24 |
| 53.68 | 1196.21 |
| 53.69 | 1109.53 |
| 53.7  | 1161.54 |
| 53.71 | 1196.21 |
| 53.72 | 1334.9  |
| 53.73 | 1092.19 |
| 53.74 | 1161.54 |
| 53.75 | 1005.51 |
| 53.76 | 1074.85 |
| 53.77 | 1213.55 |
| 53.78 | 1022.85 |
| 53.79 | 1334.9  |
| 53.8  | 884.155 |
| 53.81 | 1196.21 |
| 53.82 | 1040.18 |
| 53.83 | 1109.53 |
| 53.84 | 1074.85 |
| 53.85 | 1404.25 |
| 53.86 | 1352.24 |
| 53.87 | 1126.86 |
| 53.88 | 1265.56 |
| 53.89 | 1057.52 |
| 53.9  | 1074.85 |
| 53.91 | 1074.85 |
| 53.92 | 1144.2  |
| 53.93 | 1126.86 |
| 53.94 | 1161.54 |
| 53.95 | 1248.22 |
| 53.96 | 1057.52 |
| 53.97 | 1092.19 |
| 53.98 | 1230.88 |
| 53.99 | 1334.9  |
| 54    | 1144.2  |
| 54.01 | 1265.56 |
| 54.02 | 1300.23 |
| 54.03 | 1057.52 |
| 54.04 | 1126.86 |
| 54.05 | 1092.19 |
| 54.06 | 1230.88 |
| 54.07 | 1022.85 |

|       |         |
|-------|---------|
| 54.08 | 1317.56 |
| 54.09 | 1248.22 |
| 54.1  | 1317.56 |
| 54.11 | 1109.53 |
| 54.12 | 1144.2  |
| 54.13 | 918.828 |
| 54.14 | 1317.56 |
| 54.15 | 1178.87 |
| 54.16 | 1352.24 |
| 54.17 | 1161.54 |
| 54.18 | 1178.87 |
| 54.19 | 1144.2  |
| 54.2  | 1040.18 |
| 54.21 | 1057.52 |
| 54.22 | 1057.52 |
| 54.23 | 1126.86 |
| 54.24 | 1057.52 |
| 54.25 | 1109.53 |
| 54.26 | 1109.53 |
| 54.27 | 1265.56 |
| 54.28 | 1057.52 |
| 54.29 | 1109.53 |
| 54.3  | 1161.54 |
| 54.31 | 1022.85 |
| 54.32 | 1022.85 |
| 54.33 | 849.482 |
| 54.34 | 1317.56 |
| 54.35 | 1092.19 |
| 54.36 | 988.173 |
| 54.37 | 1213.55 |
| 54.38 | 918.828 |
| 54.39 | 1144.2  |
| 54.4  | 1282.89 |
| 54.41 | 1369.57 |
| 54.42 | 1178.87 |
| 54.43 | 1196.21 |
| 54.44 | 1230.88 |
| 54.45 | 1126.86 |
| 54.46 | 1057.52 |
| 54.47 | 1092.19 |
| 54.48 | 1144.2  |
| 54.49 | 1074.85 |
| 54.5  | 1213.55 |
| 54.51 | 1196.21 |

|       |         |
|-------|---------|
| 54.52 | 1040.18 |
| 54.53 | 1196.21 |
| 54.54 | 1144.2  |
| 54.55 | 1022.85 |
| 54.56 | 1317.56 |
| 54.57 | 1178.87 |
| 54.58 | 1005.51 |
| 54.59 | 1040.18 |
| 54.6  | 1074.85 |
| 54.61 | 1057.52 |
| 54.62 | 1040.18 |
| 54.63 | 1092.19 |
| 54.64 | 1248.22 |
| 54.65 | 1005.51 |
| 54.66 | 1144.2  |
| 54.67 | 953.5   |
| 54.68 | 1265.56 |
| 54.69 | 1282.89 |
| 54.7  | 1057.52 |
| 54.71 | 1092.19 |
| 54.72 | 1005.51 |
| 54.73 | 1144.2  |
| 54.74 | 1040.18 |
| 54.75 | 1022.85 |
| 54.76 | 1161.54 |
| 54.77 | 1421.58 |
| 54.78 | 1248.22 |
| 54.79 | 1144.2  |
| 54.8  | 1230.88 |
| 54.81 | 918.828 |
| 54.82 | 953.5   |
| 54.83 | 1300.23 |
| 54.84 | 1144.2  |
| 54.85 | 1248.22 |
| 54.86 | 1126.86 |
| 54.87 | 1213.55 |
| 54.88 | 1369.57 |
| 54.89 | 1230.88 |
| 54.9  | 1144.2  |
| 54.91 | 1057.52 |
| 54.92 | 1092.19 |
| 54.93 | 1230.88 |
| 54.94 | 866.819 |
| 54.95 | 1161.54 |

|       |         |
|-------|---------|
| 54.96 | 1092.19 |
| 54.97 | 1074.85 |
| 54.98 | 1126.86 |
| 54.99 | 1230.88 |
| 55    | 1057.52 |
| 55.01 | 1300.23 |
| 55.02 | 953.5   |
| 55.03 | 1161.54 |
| 55.04 | 1577.61 |
| 55.05 | 1144.2  |
| 55.06 | 1178.87 |
| 55.07 | 1144.2  |
| 55.08 | 1230.88 |
| 55.09 | 1161.54 |
| 55.1  | 1248.22 |
| 55.11 | 1057.52 |
| 55.12 | 1161.54 |
| 55.13 | 1074.85 |
| 55.14 | 1248.22 |
| 55.15 | 1057.52 |
| 55.16 | 1178.87 |
| 55.17 | 1074.85 |
| 55.18 | 1265.56 |
| 55.19 | 814.809 |
| 55.2  | 1456.26 |
| 55.21 | 1369.57 |
| 55.22 | 1248.22 |
| 55.23 | 1161.54 |
| 55.24 | 1213.55 |
| 55.25 | 1144.2  |
| 55.26 | 1144.2  |
| 55.27 | 1213.55 |
| 55.28 | 1074.85 |
| 55.29 | 1022.85 |
| 55.3  | 1213.55 |
| 55.31 | 1282.89 |
| 55.32 | 1144.2  |
| 55.33 | 1057.52 |
| 55.34 | 1230.88 |
| 55.35 | 1300.23 |
| 55.36 | 1334.9  |
| 55.37 | 1369.57 |
| 55.38 | 1334.9  |
| 55.39 | 1161.54 |

|       |         |
|-------|---------|
| 55.4  | 1248.22 |
| 55.41 | 1022.85 |
| 55.42 | 1248.22 |
| 55.43 | 1161.54 |
| 55.44 | 1074.85 |
| 55.45 | 1300.23 |
| 55.46 | 1196.21 |
| 55.47 | 953.5   |
| 55.48 | 1144.2  |
| 55.49 | 1213.55 |
| 55.5  | 1092.19 |
| 55.51 | 1282.89 |
| 55.52 | 1213.55 |
| 55.53 | 1248.22 |
| 55.54 | 884.155 |
| 55.55 | 1248.22 |
| 55.56 | 1144.2  |
| 55.57 | 1161.54 |
| 55.58 | 1057.52 |
| 55.59 | 1126.86 |
| 55.6  | 1022.85 |
| 55.61 | 1109.53 |
| 55.62 | 1126.86 |
| 55.63 | 901.491 |
| 55.64 | 1196.21 |
| 55.65 | 1334.9  |
| 55.66 | 1473.59 |
| 55.67 | 1265.56 |
| 55.68 | 901.491 |
| 55.69 | 988.173 |
| 55.7  | 1005.51 |
| 55.71 | 1473.59 |
| 55.72 | 1196.21 |
| 55.73 | 1282.89 |
| 55.74 | 1213.55 |
| 55.75 | 988.173 |
| 55.76 | 988.173 |
| 55.77 | 1126.86 |
| 55.78 | 1022.85 |
| 55.79 | 1196.21 |
| 55.8  | 1161.54 |
| 55.81 | 1161.54 |
| 55.82 | 1005.51 |
| 55.83 | 1178.87 |



|       |         |
|-------|---------|
| 55.84 | 1196.21 |
| 55.85 | 1248.22 |
| 55.86 | 1074.85 |
| 55.87 | 1352.24 |
| 55.88 | 1196.21 |
| 55.89 | 1525.6  |
| 55.9  | 1265.56 |
| 55.91 | 1508.26 |
| 55.92 | 1265.56 |
| 55.93 | 1196.21 |
| 55.94 | 936.164 |
| 55.95 | 1109.53 |
| 55.96 | 1317.56 |
| 55.97 | 1352.24 |
| 55.98 | 1161.54 |
| 55.99 | 1196.21 |
| 56    | 1352.24 |
| 56.01 | 1144.2  |
| 56.02 | 1265.56 |
| 56.03 | 1230.88 |
| 56.04 | 1282.89 |
| 56.05 | 1057.52 |
| 56.06 | 988.173 |
| 56.07 | 1092.19 |
| 56.08 | 1300.23 |
| 56.09 | 1126.86 |
| 56.1  | 1022.85 |
| 56.11 | 1005.51 |
| 56.12 | 1040.18 |
| 56.13 | 1352.24 |
| 56.14 | 1196.21 |
| 56.15 | 1144.2  |
| 56.16 | 1265.56 |
| 56.17 | 1230.88 |
| 56.18 | 1040.18 |
| 56.19 | 1248.22 |
| 56.2  | 1282.89 |
| 56.21 | 1404.25 |
| 56.22 | 1213.55 |
| 56.23 | 1248.22 |
| 56.24 | 1178.87 |
| 56.25 | 1421.58 |
| 56.26 | 1334.9  |
| 56.27 | 1092.19 |

|       |         |
|-------|---------|
| 56.28 | 1248.22 |
| 56.29 | 1473.59 |
| 56.3  | 1473.59 |
| 56.31 | 1161.54 |
| 56.32 | 1196.21 |
| 56.33 | 1317.56 |
| 56.34 | 1542.94 |
| 56.35 | 1352.24 |
| 56.36 | 1369.57 |
| 56.37 | 1612.28 |
| 56.38 | 1577.61 |
| 56.39 | 1629.62 |
| 56.4  | 1525.6  |
| 56.41 | 1456.26 |
| 56.42 | 1542.94 |
| 56.43 | 1404.25 |
| 56.44 | 1542.94 |
| 56.45 | 1750.97 |
| 56.46 | 1681.63 |
| 56.47 | 2080.36 |
| 56.48 | 1733.64 |
| 56.49 | 2201.72 |
| 56.5  | 2028.36 |
| 56.51 | 2479.1  |
| 56.52 | 2791.16 |
| 56.53 | 2825.83 |
| 56.54 | 2860.5  |
| 56.55 | 3155.22 |
| 56.56 | 4022.04 |
| 56.57 | 3449.94 |
| 56.58 | 4160.73 |
| 56.59 | 4715.49 |
| 56.6  | 5010.21 |
| 56.61 | 6189.08 |
| 56.62 | 6570.48 |
| 56.63 | 6622.49 |
| 56.64 | 6466.47 |
| 56.65 | 6483.8  |
| 56.66 | 7298.61 |
| 56.67 | 7437.3  |
| 56.68 | 6570.48 |
| 56.69 | 5998.38 |
| 56.7  | 5148.9  |
| 56.71 | 4958.2  |

|       |         |
|-------|---------|
| 56.72 | 4802.17 |
| 56.73 | 4698.16 |
| 56.74 | 4576.8  |
| 56.75 | 4160.73 |
| 56.76 | 4299.42 |
| 56.77 | 4542.13 |
| 56.78 | 4004.7  |
| 56.79 | 4386.1  |
| 56.8  | 4698.16 |
| 56.81 | 4212.74 |
| 56.82 | 4039.37 |
| 56.83 | 3640.64 |
| 56.84 | 3675.31 |
| 56.85 | 3588.63 |
| 56.86 | 3345.92 |
| 56.87 | 2860.5  |
| 56.88 | 2132.37 |
| 56.89 | 2392.42 |
| 56.9  | 2271.06 |
| 56.91 | 1941.67 |
| 56.92 | 2045.69 |
| 56.93 | 1594.95 |
| 56.94 | 1924.34 |
| 56.95 | 1698.96 |
| 56.96 | 1577.61 |
| 56.97 | 1508.26 |
| 56.98 | 1577.61 |
| 56.99 | 1542.94 |
| 57    | 1750.97 |
| 57.01 | 1421.58 |
| 57.02 | 1386.91 |
| 57.03 | 1542.94 |
| 57.04 | 1473.59 |
| 57.05 | 1594.95 |
| 57.06 | 1594.95 |
| 57.07 | 1317.56 |
| 57.08 | 1230.88 |
| 57.09 | 1646.96 |
| 57.1  | 1681.63 |
| 57.11 | 1629.62 |
| 57.12 | 1421.58 |
| 57.13 | 1542.94 |
| 57.14 | 1508.26 |
| 57.15 | 1594.95 |

|       |         |
|-------|---------|
| 57.16 | 1508.26 |
| 57.17 | 1629.62 |
| 57.18 | 1560.27 |
| 57.19 | 1750.97 |
| 57.2  | 2097.7  |
| 57.21 | 1837.66 |
| 57.22 | 1872.33 |
| 57.23 | 2063.03 |
| 57.24 | 2444.43 |
| 57.25 | 2097.7  |
| 57.26 | 2479.1  |
| 57.27 | 2565.78 |
| 57.28 | 2461.76 |
| 57.29 | 2617.79 |
| 57.3  | 3363.26 |
| 57.31 | 3345.92 |
| 57.32 | 3033.86 |
| 57.33 | 3605.97 |
| 57.34 | 3987.37 |
| 57.35 | 4403.44 |
| 57.36 | 4576.8  |
| 57.37 | 4906.19 |
| 57.38 | 6501.14 |
| 57.39 | 6206.42 |
| 57.4  | 6639.83 |
| 57.41 | 7419.97 |
| 57.42 | 10384.5 |
| 57.43 | 10679.2 |
| 57.44 | 12170.1 |
| 57.45 | 13574.4 |
| 57.46 | 14319.8 |
| 57.47 | 16001.5 |
| 57.48 | 16486.9 |
| 57.49 | 15793.4 |
| 57.5  | 15793.4 |
| 57.51 | 15221.3 |
| 57.52 | 13851.8 |
| 57.53 | 13019.6 |
| 57.54 | 11632.7 |
| 57.55 | 11008.6 |
| 57.56 | 9829.72 |
| 57.57 | 9795.05 |
| 57.58 | 9136.27 |
| 57.59 | 8581.5  |

|       |         |
|-------|---------|
| 57.6  | 9378.98 |
| 57.61 | 9292.29 |
| 57.62 | 9864.39 |
| 57.63 | 9673.69 |
| 57.64 | 9604.35 |
| 57.65 | 9153.6  |
| 57.66 | 8564.17 |
| 57.67 | 8217.44 |
| 57.68 | 7090.58 |
| 57.69 | 6553.15 |
| 57.7  | 5703.67 |
| 57.71 | 5079.56 |
| 57.72 | 4542.13 |
| 57.73 | 4351.43 |
| 57.74 | 3588.63 |
| 57.75 | 2947.18 |
| 57.76 | 2843.16 |
| 57.77 | 2860.5  |
| 57.78 | 2617.79 |
| 57.79 | 2947.18 |
| 57.8  | 2045.69 |
| 57.81 | 2097.7  |
| 57.82 | 2149.71 |
| 57.83 | 2288.4  |
| 57.84 | 2253.73 |
| 57.85 | 2219.06 |
| 57.86 | 1959.01 |
| 57.87 | 1733.64 |
| 57.88 | 1802.98 |
| 57.89 | 1421.58 |
| 57.9  | 1612.28 |
| 57.91 | 1629.62 |
| 57.92 | 1646.96 |
| 57.93 | 1594.95 |
| 57.94 | 1750.97 |
| 57.95 | 1490.93 |
| 57.96 | 1629.62 |
| 57.97 | 1664.29 |
| 57.98 | 1785.65 |
| 57.99 | 1646.96 |
| 58    | 2028.36 |
| 58.01 | 2028.36 |
| 58.02 | 1976.35 |
| 58.03 | 1854.99 |

|       |         |
|-------|---------|
| 58.04 | 2063.03 |
| 58.05 | 2305.74 |
| 58.06 | 2687.14 |
| 58.07 | 2357.75 |
| 58.08 | 2444.43 |
| 58.09 | 2635.13 |
| 58.1  | 2999.19 |
| 58.11 | 2721.81 |
| 58.12 | 3103.21 |
| 58.13 | 3241.9  |
| 58.14 | 3276.57 |
| 58.15 | 3397.93 |
| 58.16 | 3588.63 |
| 58.17 | 3415.26 |
| 58.18 | 3103.21 |
| 58.19 | 2912.51 |
| 58.2  | 2548.45 |
| 58.21 | 2409.76 |
| 58.22 | 2427.09 |
| 58.23 | 2063.03 |
| 58.24 | 2201.72 |
| 58.25 | 2305.74 |
| 58.26 | 2132.37 |
| 58.27 | 1976.35 |
| 58.28 | 2340.41 |
| 58.29 | 2548.45 |
| 58.3  | 2617.79 |
| 58.31 | 2496.44 |
| 58.32 | 2184.38 |
| 58.33 | 1681.63 |
| 58.34 | 2427.09 |
| 58.35 | 2149.71 |
| 58.36 | 2184.38 |
| 58.37 | 1941.67 |
| 58.38 | 1456.26 |
| 58.39 | 1421.58 |
| 58.4  | 1646.96 |
| 58.41 | 1473.59 |
| 58.42 | 1248.22 |
| 58.43 | 1369.57 |
| 58.44 | 1317.56 |
| 58.45 | 1404.25 |
| 58.46 | 1473.59 |
| 58.47 | 1352.24 |

|       |         |
|-------|---------|
| 58.48 | 1438.92 |
| 58.49 | 1248.22 |
| 58.5  | 1161.54 |
| 58.51 | 1352.24 |
| 58.52 | 1352.24 |
| 58.53 | 1386.91 |
| 58.54 | 1386.91 |
| 58.55 | 1300.23 |
| 58.56 | 1196.21 |
| 58.57 | 1196.21 |
| 58.58 | 1265.56 |
| 58.59 | 1334.9  |
| 58.6  | 1282.89 |
| 58.61 | 1265.56 |
| 58.62 | 1334.9  |
| 58.63 | 1334.9  |
| 58.64 | 1334.9  |
| 58.65 | 1161.54 |
| 58.66 | 1230.88 |
| 58.67 | 1144.2  |
| 58.68 | 1265.56 |
| 58.69 | 1213.55 |
| 58.7  | 1282.89 |
| 58.71 | 1282.89 |
| 58.72 | 1178.87 |
| 58.73 | 1109.53 |
| 58.74 | 1282.89 |
| 58.75 | 1282.89 |
| 58.76 | 1109.53 |
| 58.77 | 1161.54 |
| 58.78 | 1178.87 |
| 58.79 | 1404.25 |
| 58.8  | 1265.56 |
| 58.81 | 1144.2  |
| 58.82 | 1178.87 |
| 58.83 | 1334.9  |
| 58.84 | 1213.55 |
| 58.85 | 1178.87 |
| 58.86 | 1404.25 |
| 58.87 | 1213.55 |
| 58.88 | 1022.85 |
| 58.89 | 1161.54 |
| 58.9  | 1005.51 |
| 58.91 | 1230.88 |

|       |         |
|-------|---------|
| 58.92 | 1317.56 |
| 58.93 | 1074.85 |
| 58.94 | 1248.22 |
| 58.95 | 1317.56 |
| 58.96 | 953.5   |
| 58.97 | 1161.54 |
| 58.98 | 1230.88 |
| 58.99 | 1282.89 |
| 59    | 1074.85 |
| 59.01 | 1126.86 |
| 59.02 | 1265.56 |
| 59.03 | 1213.55 |
| 59.04 | 1213.55 |
| 59.05 | 1369.57 |
| 59.06 | 1022.85 |
| 59.07 | 1161.54 |
| 59.08 | 1144.2  |
| 59.09 | 1369.57 |
| 59.1  | 1040.18 |
| 59.11 | 1178.87 |
| 59.12 | 1109.53 |
| 59.13 | 970.837 |
| 59.14 | 970.837 |
| 59.15 | 953.5   |
| 59.16 | 1404.25 |
| 59.17 | 1282.89 |
| 59.18 | 1126.86 |
| 59.19 | 866.819 |
| 59.2  | 1230.88 |
| 59.21 | 1196.21 |
| 59.22 | 1126.86 |
| 59.23 | 970.837 |
| 59.24 | 1092.19 |
| 59.25 | 1005.51 |
| 59.26 | 936.164 |
| 59.27 | 1057.52 |
| 59.28 | 1196.21 |
| 59.29 | 1161.54 |
| 59.3  | 1352.24 |
| 59.31 | 1022.85 |
| 59.32 | 1022.85 |
| 59.33 | 1057.52 |
| 59.34 | 1161.54 |
| 59.35 | 1161.54 |



|       |         |
|-------|---------|
| 59.36 | 1144.2  |
| 59.37 | 1230.88 |
| 59.38 | 1022.85 |
| 59.39 | 901.491 |
| 59.4  | 1421.58 |
| 59.41 | 1196.21 |
| 59.42 | 1109.53 |
| 59.43 | 1317.56 |
| 59.44 | 1144.2  |
| 59.45 | 918.828 |
| 59.46 | 1144.2  |
| 59.47 | 884.155 |
| 59.48 | 1178.87 |
| 59.49 | 1196.21 |
| 59.5  | 1144.2  |
| 59.51 | 1040.18 |
| 59.52 | 1317.56 |
| 59.53 | 1213.55 |
| 59.54 | 1057.52 |
| 59.55 | 1161.54 |
| 59.56 | 953.5   |
| 59.57 | 1213.55 |
| 59.58 | 1230.88 |
| 59.59 | 901.491 |
| 59.6  | 1109.53 |
| 59.61 | 1109.53 |
| 59.62 | 1092.19 |
| 59.63 | 1126.86 |
| 59.64 | 1040.18 |
| 59.65 | 1248.22 |
| 59.66 | 1126.86 |
| 59.67 | 1178.87 |
| 59.68 | 1022.85 |
| 59.69 | 1109.53 |
| 59.7  | 1161.54 |
| 59.71 | 1022.85 |
| 59.72 | 1005.51 |
| 59.73 | 1109.53 |
| 59.74 | 1092.19 |
| 59.75 | 1126.86 |
| 59.76 | 1092.19 |
| 59.77 | 1109.53 |
| 59.78 | 1178.87 |
| 59.79 | 1282.89 |

|       |         |
|-------|---------|
| 59.8  | 1074.85 |
| 59.81 | 1040.18 |
| 59.82 | 1317.56 |
| 59.83 | 1282.89 |
| 59.84 | 1092.19 |
| 59.85 | 1022.85 |
| 59.86 | 1109.53 |
| 59.87 | 1161.54 |
| 59.88 | 1109.53 |
| 59.89 | 1282.89 |
| 59.9  | 1317.56 |
| 59.91 | 1144.2  |
| 59.92 | 1230.88 |
| 59.93 | 1178.87 |
| 59.94 | 936.164 |
| 59.95 | 1074.85 |
| 59.96 | 1109.53 |
| 59.97 | 1074.85 |
| 59.98 | 1265.56 |
| 59.99 | 1300.23 |
| 60    | 988.173 |
| 60.01 | 849.482 |
| 60.02 | 1092.19 |
| 60.03 | 1265.56 |
| 60.04 | 1126.86 |
| 60.05 | 1213.55 |
| 60.06 | 1300.23 |
| 60.07 | 901.491 |
| 60.08 | 970.837 |
| 60.09 | 1196.21 |
| 60.1  | 1005.51 |
| 60.11 | 1126.86 |
| 60.12 | 1144.2  |
| 60.13 | 1109.53 |
| 60.14 | 1265.56 |
| 60.15 | 1300.23 |
| 60.16 | 1109.53 |
| 60.17 | 1213.55 |
| 60.18 | 970.837 |
| 60.19 | 1022.85 |
| 60.2  | 1542.94 |
| 60.21 | 1196.21 |
| 60.22 | 1057.52 |
| 60.23 | 1109.53 |

|       |         |
|-------|---------|
| 60.24 | 1040.18 |
| 60.25 | 1092.19 |
| 60.26 | 1438.92 |
| 60.27 | 1352.24 |
| 60.28 | 1213.55 |
| 60.29 | 1248.22 |
| 60.3  | 1230.88 |
| 60.31 | 1196.21 |
| 60.32 | 1040.18 |
| 60.33 | 1126.86 |
| 60.34 | 1057.52 |
| 60.35 | 1300.23 |
| 60.36 | 1369.57 |
| 60.37 | 1300.23 |
| 60.38 | 1386.91 |
| 60.39 | 1074.85 |
| 60.4  | 1508.26 |
| 60.41 | 1248.22 |
| 60.42 | 1542.94 |
| 60.43 | 1386.91 |
| 60.44 | 1542.94 |
| 60.45 | 1490.93 |
| 60.46 | 1664.29 |
| 60.47 | 1248.22 |
| 60.48 | 1490.93 |
| 60.49 | 1508.26 |
| 60.5  | 1733.64 |
| 60.51 | 1976.35 |
| 60.52 | 1733.64 |
| 60.53 | 1802.98 |
| 60.54 | 1889.66 |
| 60.55 | 1976.35 |
| 60.56 | 2271.06 |
| 60.57 | 2097.7  |
| 60.58 | 2184.38 |
| 60.59 | 2409.76 |
| 60.6  | 2496.44 |
| 60.61 | 2825.83 |
| 60.62 | 2843.16 |
| 60.63 | 2843.16 |
| 60.64 | 3259.24 |
| 60.65 | 3831.34 |
| 60.66 | 4212.74 |
| 60.67 | 5235.58 |

|       |         |
|-------|---------|
| 60.68 | 5616.98 |
| 60.69 | 6206.42 |
| 60.7  | 7471.98 |
| 60.71 | 7333.28 |
| 60.72 | 8494.82 |
| 60.73 | 9743.04 |
| 60.74 | 9899.07 |
| 60.75 | 10835.2 |
| 60.76 | 9777.71 |
| 60.77 | 10401.8 |
| 60.78 | 9760.38 |
| 60.79 | 9448.32 |
| 60.8  | 8061.41 |
| 60.81 | 7575.99 |
| 60.82 | 6206.42 |
| 60.83 | 5911.7  |
| 60.84 | 5981.05 |
| 60.85 | 5807.68 |
| 60.86 | 5356.94 |
| 60.87 | 6067.73 |
| 60.88 | 5981.05 |
| 60.89 | 6379.78 |
| 60.9  | 6466.47 |
| 60.91 | 6882.54 |
| 60.92 | 6951.88 |
| 60.93 | 6709.18 |
| 60.94 | 5911.7  |
| 60.95 | 6033.06 |
| 60.96 | 5842.36 |
| 60.97 | 5582.31 |
| 60.98 | 5010.21 |
| 60.99 | 4888.86 |
| 61    | 4888.86 |
| 61.01 | 5010.21 |
| 61.02 | 5270.26 |
| 61.03 | 4680.82 |
| 61.04 | 5426.28 |
| 61.05 | 5634.32 |
| 61.06 | 6189.08 |
| 61.07 | 6137.08 |
| 61.08 | 6535.81 |
| 61.09 | 6171.75 |
| 61.1  | 5634.32 |
| 61.11 | 4559.47 |

|       |         |
|-------|---------|
| 61.12 | 4316.76 |
| 61.13 | 3935.36 |
| 61.14 | 4299.42 |
| 61.15 | 3380.59 |
| 61.16 | 3415.26 |
| 61.17 | 3761.99 |
| 61.18 | 3935.36 |
| 61.19 | 3970.03 |
| 61.2  | 3779.33 |
| 61.21 | 3709.98 |
| 61.22 | 4056.71 |
| 61.23 | 3588.63 |
| 61.24 | 3571.29 |
| 61.25 | 4108.72 |
| 61.26 | 3918.02 |
| 61.27 | 3744.66 |
| 61.28 | 3571.29 |
| 61.29 | 3415.26 |
| 61.3  | 3085.87 |
| 61.31 | 3137.88 |
| 61.32 | 3467.27 |
| 61.33 | 2929.85 |
| 61.34 | 3415.26 |
| 61.35 | 3536.62 |
| 61.36 | 3709.98 |
| 61.37 | 3727.32 |
| 61.38 | 4368.77 |
| 61.39 | 4524.79 |
| 61.4  | 4940.87 |
| 61.41 | 5339.6  |
| 61.42 | 5252.92 |
| 61.43 | 5651.66 |
| 61.44 | 5270.26 |
| 61.45 | 5495.63 |
| 61.46 | 5495.63 |
| 61.47 | 5339.6  |
| 61.48 | 5027.55 |
| 61.49 | 4958.2  |
| 61.5  | 4334.09 |
| 61.51 | 4195.4  |
| 61.52 | 3657.97 |
| 61.53 | 3484.61 |
| 61.54 | 3276.57 |
| 61.55 | 3241.9  |

|       |         |
|-------|---------|
| 61.56 | 3397.93 |
| 61.57 | 3796.67 |
| 61.58 | 3484.61 |
| 61.59 | 3467.27 |
| 61.6  | 3796.67 |
| 61.61 | 3675.31 |
| 61.62 | 3623.3  |
| 61.63 | 3519.28 |
| 61.64 | 3155.22 |
| 61.65 | 3051.2  |
| 61.66 | 2721.81 |
| 61.67 | 2583.12 |
| 61.68 | 2253.73 |
| 61.69 | 2045.69 |
| 61.7  | 2045.69 |
| 61.71 | 1854.99 |
| 61.72 | 2115.04 |
| 61.73 | 1698.96 |
| 61.74 | 1681.63 |
| 61.75 | 1421.58 |
| 61.76 | 1577.61 |
| 61.77 | 1646.96 |
| 61.78 | 1629.62 |
| 61.79 | 1490.93 |
| 61.8  | 1265.56 |
| 61.81 | 1300.23 |
| 61.82 | 1317.56 |
| 61.83 | 1178.87 |
| 61.84 | 1144.2  |
| 61.85 | 1473.59 |
| 61.86 | 1040.18 |
| 61.87 | 1438.92 |
| 61.88 | 1369.57 |
| 61.89 | 1282.89 |
| 61.9  | 1022.85 |
| 61.91 | 936.164 |
| 61.92 | 1334.9  |
| 61.93 | 1178.87 |
| 61.94 | 1369.57 |
| 61.95 | 1161.54 |
| 61.96 | 1213.55 |
| 61.97 | 936.164 |
| 61.98 | 1022.85 |
| 61.99 | 1144.2  |

|       |         |
|-------|---------|
| 62    | 1092.19 |
| 62.01 | 1352.24 |
| 62.02 | 1092.19 |
| 62.03 | 1230.88 |
| 62.04 | 1109.53 |
| 62.05 | 1040.18 |
| 62.06 | 1022.85 |
| 62.07 | 1300.23 |
| 62.08 | 1196.21 |
| 62.09 | 1057.52 |
| 62.1  | 1213.55 |
| 62.11 | 1057.52 |
| 62.12 | 1074.85 |
| 62.13 | 762.8   |
| 62.14 | 1126.86 |
| 62.15 | 1317.56 |
| 62.16 | 988.173 |
| 62.17 | 1248.22 |
| 62.18 | 1040.18 |
| 62.19 | 1022.85 |
| 62.2  | 1178.87 |
| 62.21 | 1074.85 |
| 62.22 | 884.155 |
| 62.23 | 918.828 |
| 62.24 | 1057.52 |
| 62.25 | 1196.21 |
| 62.26 | 1144.2  |
| 62.27 | 1074.85 |
| 62.28 | 1040.18 |
| 62.29 | 1074.85 |
| 62.3  | 1040.18 |
| 62.31 | 1265.56 |
| 62.32 | 1109.53 |
| 62.33 | 1126.86 |
| 62.34 | 1334.9  |
| 62.35 | 1126.86 |
| 62.36 | 936.164 |
| 62.37 | 1317.56 |
| 62.38 | 1022.85 |
| 62.39 | 1213.55 |
| 62.4  | 1022.85 |
| 62.41 | 1213.55 |
| 62.42 | 1334.9  |
| 62.43 | 988.173 |

|       |         |
|-------|---------|
| 62.44 | 1248.22 |
| 62.45 | 1057.52 |
| 62.46 | 1230.88 |
| 62.47 | 1213.55 |
| 62.48 | 1040.18 |
| 62.49 | 1161.54 |
| 62.5  | 1022.85 |
| 62.51 | 1092.19 |
| 62.52 | 1040.18 |
| 62.53 | 1074.85 |
| 62.54 | 1230.88 |
| 62.55 | 1213.55 |
| 62.56 | 1178.87 |
| 62.57 | 970.837 |
| 62.58 | 1092.19 |
| 62.59 | 1213.55 |
| 62.6  | 1005.51 |
| 62.61 | 1022.85 |
| 62.62 | 1144.2  |
| 62.63 | 1161.54 |
| 62.64 | 988.173 |
| 62.65 | 1300.23 |
| 62.66 | 1144.2  |
| 62.67 | 953.5   |
| 62.68 | 849.482 |
| 62.69 | 1213.55 |
| 62.7  | 1317.56 |
| 62.71 | 1057.52 |
| 62.72 | 1369.57 |
| 62.73 | 1282.89 |
| 62.74 | 884.155 |
| 62.75 | 1178.87 |
| 62.76 | 1074.85 |
| 62.77 | 1317.56 |
| 62.78 | 849.482 |
| 62.79 | 1144.2  |
| 62.8  | 1144.2  |
| 62.81 | 970.837 |
| 62.82 | 1022.85 |
| 62.83 | 1178.87 |
| 62.84 | 1404.25 |
| 62.85 | 1092.19 |
| 62.86 | 1369.57 |
| 62.87 | 1282.89 |



|       |         |
|-------|---------|
| 62.88 | 1525.6  |
| 62.89 | 1508.26 |
| 62.9  | 1282.89 |
| 62.91 | 1092.19 |
| 62.92 | 1317.56 |
| 62.93 | 1421.58 |
| 62.94 | 1577.61 |
| 62.95 | 1490.93 |
| 62.96 | 1716.3  |
| 62.97 | 2167.05 |
| 62.98 | 1802.98 |
| 62.99 | 1768.31 |
| 63    | 1802.98 |
| 63.01 | 2149.71 |
| 63.02 | 1941.67 |
| 63.03 | 1941.67 |
| 63.04 | 2236.39 |
| 63.05 | 2357.75 |
| 63.06 | 2947.18 |
| 63.07 | 3120.55 |
| 63.08 | 2721.81 |
| 63.09 | 3449.94 |
| 63.1  | 3952.69 |
| 63.11 | 3848.67 |
| 63.12 | 4004.7  |
| 63.13 | 4212.74 |
| 63.14 | 4559.47 |
| 63.15 | 4420.77 |
| 63.16 | 4056.71 |
| 63.17 | 3727.32 |
| 63.18 | 3553.96 |
| 63.19 | 3259.24 |
| 63.2  | 2981.86 |
| 63.21 | 2981.86 |
| 63.22 | 3051.2  |
| 63.23 | 2825.83 |
| 63.24 | 2825.83 |
| 63.25 | 2565.78 |
| 63.26 | 2548.45 |
| 63.27 | 2843.16 |
| 63.28 | 2791.16 |
| 63.29 | 2860.5  |
| 63.3  | 2600.46 |
| 63.31 | 2496.44 |

|       |         |
|-------|---------|
| 63.32 | 2704.47 |
| 63.33 | 2773.82 |
| 63.34 | 2253.73 |
| 63.35 | 2184.38 |
| 63.36 | 2219.06 |
| 63.37 | 1837.66 |
| 63.38 | 1802.98 |
| 63.39 | 2063.03 |
| 63.4  | 1889.66 |
| 63.41 | 1508.26 |
| 63.42 | 1716.3  |
| 63.43 | 1386.91 |
| 63.44 | 1282.89 |
| 63.45 | 1404.25 |
| 63.46 | 1282.89 |
| 63.47 | 1334.9  |
| 63.48 | 1144.2  |
| 63.49 | 1230.88 |
| 63.5  | 1438.92 |
| 63.51 | 1352.24 |
| 63.52 | 1126.86 |
| 63.53 | 1040.18 |
| 63.54 | 1386.91 |
| 63.55 | 1074.85 |
| 63.56 | 1248.22 |
| 63.57 | 1074.85 |
| 63.58 | 1282.89 |
| 63.59 | 1040.18 |
| 63.6  | 1178.87 |
| 63.61 | 1386.91 |
| 63.62 | 1092.19 |
| 63.63 | 1213.55 |
| 63.64 | 1040.18 |
| 63.65 | 1057.52 |
| 63.66 | 1126.86 |
| 63.67 | 1022.85 |
| 63.68 | 1126.86 |
| 63.69 | 1074.85 |
| 63.7  | 1178.87 |
| 63.71 | 1352.24 |
| 63.72 | 1300.23 |
| 63.73 | 1074.85 |
| 63.74 | 953.5   |
| 63.75 | 1300.23 |

|       |         |
|-------|---------|
| 63.76 | 1178.87 |
| 63.77 | 1022.85 |
| 63.78 | 1161.54 |
| 63.79 | 1230.88 |
| 63.8  | 1126.86 |
| 63.81 | 988.173 |
| 63.82 | 936.164 |
| 63.83 | 1057.52 |
| 63.84 | 1109.53 |
| 63.85 | 1144.2  |
| 63.86 | 1126.86 |
| 63.87 | 1092.19 |
| 63.88 | 1144.2  |
| 63.89 | 953.5   |
| 63.9  | 1161.54 |
| 63.91 | 1178.87 |
| 63.92 | 1230.88 |
| 63.93 | 970.837 |
| 63.94 | 1057.52 |
| 63.95 | 1144.2  |
| 63.96 | 1092.19 |
| 63.97 | 1248.22 |
| 63.98 | 1040.18 |
| 63.99 | 1005.51 |
| 64    | 797.473 |
| 64.01 | 970.837 |
| 64.02 | 1040.18 |
| 64.03 | 1126.86 |
| 64.04 | 1248.22 |
| 64.05 | 1057.52 |
| 64.06 | 970.837 |
| 64.07 | 866.819 |
| 64.08 | 1005.51 |
| 64.09 | 1040.18 |
| 64.1  | 1057.52 |
| 64.11 | 1213.55 |
| 64.12 | 1005.51 |
| 64.13 | 1057.52 |
| 64.14 | 1144.2  |
| 64.15 | 1092.19 |
| 64.16 | 988.173 |
| 64.17 | 953.5   |
| 64.18 | 1248.22 |
| 64.19 | 1265.56 |

|       |         |
|-------|---------|
| 64.2  | 1074.85 |
| 64.21 | 1144.2  |
| 64.22 | 1230.88 |
| 64.23 | 1178.87 |
| 64.24 | 1282.89 |
| 64.25 | 1300.23 |
| 64.26 | 1161.54 |
| 64.27 | 1230.88 |
| 64.28 | 1161.54 |
| 64.29 | 1092.19 |
| 64.3  | 1109.53 |
| 64.31 | 1092.19 |
| 64.32 | 1248.22 |
| 64.33 | 1196.21 |
| 64.34 | 1404.25 |
| 64.35 | 1542.94 |
| 64.36 | 1144.2  |
| 64.37 | 1196.21 |
| 64.38 | 1352.24 |
| 64.39 | 1473.59 |
| 64.4  | 1317.56 |
| 64.41 | 1334.9  |
| 64.42 | 1490.93 |
| 64.43 | 1369.57 |
| 64.44 | 1196.21 |
| 64.45 | 1334.9  |
| 64.46 | 1525.6  |
| 64.47 | 1525.6  |
| 64.48 | 1733.64 |
| 64.49 | 1698.96 |
| 64.5  | 1976.35 |
| 64.51 | 1664.29 |
| 64.52 | 1907    |
| 64.53 | 1854.99 |
| 64.54 | 1629.62 |
| 64.55 | 2011.02 |
| 64.56 | 2323.07 |
| 64.57 | 2461.76 |
| 64.58 | 2600.46 |
| 64.59 | 2305.74 |
| 64.6  | 2669.8  |
| 64.61 | 2999.19 |
| 64.62 | 3397.93 |
| 64.63 | 3866.01 |

|       |         |
|-------|---------|
| 64.64 | 4160.73 |
| 64.65 | 4524.79 |
| 64.66 | 4715.49 |
| 64.67 | 4975.54 |
| 64.68 | 6587.82 |
| 64.69 | 7437.3  |
| 64.7  | 7749.36 |
| 64.71 | 8182.77 |
| 64.72 | 9430.99 |
| 64.73 | 10211.1 |
| 64.74 | 10661.9 |
| 64.75 | 10384.5 |
| 64.76 | 10557.8 |
| 64.77 | 9691.03 |
| 64.78 | 9448.32 |
| 64.79 | 8754.87 |
| 64.8  | 7645.34 |
| 64.81 | 7662.68 |
| 64.82 | 7003.89 |
| 64.83 | 5981.05 |
| 64.84 | 5547.64 |
| 64.85 | 5408.95 |
| 64.86 | 5304.93 |
| 64.87 | 5894.37 |
| 64.88 | 6171.75 |
| 64.89 | 6085.07 |
| 64.9  | 6015.72 |
| 64.91 | 6899.88 |
| 64.92 | 7194.59 |
| 64.93 | 6414.46 |
| 64.94 | 6137.08 |
| 64.95 | 5807.68 |
| 64.96 | 5304.93 |
| 64.97 | 4888.86 |
| 64.98 | 4195.4  |
| 64.99 | 3657.97 |
| 65    | 3519.28 |
| 65.01 | 2895.17 |
| 65.02 | 2513.77 |
| 65.03 | 2565.78 |
| 65.04 | 2617.79 |
| 65.05 | 2392.42 |
| 65.06 | 2115.04 |
| 65.07 | 2201.72 |

|       |         |
|-------|---------|
| 65.08 | 1889.66 |
| 65.09 | 1854.99 |
| 65.1  | 1837.66 |
| 65.11 | 1421.58 |
| 65.12 | 1837.66 |
| 65.13 | 1716.3  |
| 65.14 | 1352.24 |
| 65.15 | 1646.96 |
| 65.16 | 1768.31 |
| 65.17 | 1369.57 |
| 65.18 | 1456.26 |
| 65.19 | 1594.95 |
| 65.2  | 1525.6  |
| 65.21 | 1404.25 |
| 65.22 | 1421.58 |
| 65.23 | 1213.55 |
| 65.24 | 1265.56 |
| 65.25 | 1144.2  |
| 65.26 | 1074.85 |
| 65.27 | 1577.61 |
| 65.28 | 1421.58 |
| 65.29 | 1421.58 |
| 65.3  | 1161.54 |
| 65.31 | 1230.88 |
| 65.32 | 1352.24 |
| 65.33 | 1334.9  |
| 65.34 | 1473.59 |
| 65.35 | 1525.6  |
| 65.36 | 1317.56 |
| 65.37 | 1525.6  |
| 65.38 | 1785.65 |
| 65.39 | 1733.64 |
| 65.4  | 1386.91 |
| 65.41 | 1334.9  |
| 65.42 | 1577.61 |
| 65.43 | 1820.32 |
| 65.44 | 2236.39 |
| 65.45 | 2063.03 |
| 65.46 | 2236.39 |
| 65.47 | 2080.36 |
| 65.48 | 2288.4  |
| 65.49 | 2305.74 |
| 65.5  | 2427.09 |
| 65.51 | 2981.86 |

|       |         |
|-------|---------|
| 65.52 | 2635.13 |
| 65.53 | 3137.88 |
| 65.54 | 3224.56 |
| 65.55 | 3380.59 |
| 65.56 | 3397.93 |
| 65.57 | 4663.48 |
| 65.58 | 4871.52 |
| 65.59 | 4871.52 |
| 65.6  | 5270.26 |
| 65.61 | 5200.91 |
| 65.62 | 6171.75 |
| 65.63 | 7229.27 |
| 65.64 | 6795.86 |
| 65.65 | 7385.29 |
| 65.66 | 7610.67 |
| 65.67 | 7801.37 |
| 65.68 | 8321.46 |
| 65.69 | 7454.64 |
| 65.7  | 7853.38 |
| 65.71 | 7281.28 |
| 65.72 | 6362.45 |
| 65.73 | 6119.74 |
| 65.74 | 5287.59 |
| 65.75 | 4923.53 |
| 65.76 | 4715.49 |
| 65.77 | 4490.12 |
| 65.78 | 4438.11 |
| 65.79 | 5218.25 |
| 65.8  | 4316.76 |
| 65.81 | 4784.84 |
| 65.82 | 4646.15 |
| 65.83 | 4264.75 |
| 65.84 | 4611.47 |
| 65.85 | 4940.87 |
| 65.86 | 4958.2  |
| 65.87 | 4767.5  |
| 65.88 | 4576.8  |
| 65.89 | 3831.34 |
| 65.9  | 3727.32 |
| 65.91 | 3293.91 |
| 65.92 | 2912.51 |
| 65.93 | 2791.16 |
| 65.94 | 2669.8  |
| 65.95 | 2409.76 |

|       |         |
|-------|---------|
| 65.96 | 1768.31 |
| 65.97 | 2045.69 |
| 65.98 | 1959.01 |
| 65.99 | 1854.99 |
| 66    | 1959.01 |
| 66.01 | 1629.62 |
| 66.02 | 1733.64 |
| 66.03 | 1421.58 |
| 66.04 | 1456.26 |
| 66.05 | 1525.6  |
| 66.06 | 1421.58 |
| 66.07 | 1248.22 |
| 66.08 | 1300.23 |
| 66.09 | 1040.18 |
| 66.1  | 1144.2  |
| 66.11 | 1300.23 |
| 66.12 | 1386.91 |
| 66.13 | 1334.9  |
| 66.14 | 1074.85 |
| 66.15 | 1092.19 |
| 66.16 | 1178.87 |
| 66.17 | 1178.87 |
| 66.18 | 1196.21 |
| 66.19 | 1196.21 |
| 66.2  | 1074.85 |
| 66.21 | 1178.87 |
| 66.22 | 1213.55 |
| 66.23 | 1144.2  |
| 66.24 | 953.5   |
| 66.25 | 988.173 |
| 66.26 | 1057.52 |
| 66.27 | 1230.88 |
| 66.28 | 1178.87 |
| 66.29 | 1005.51 |
| 66.3  | 1040.18 |
| 66.31 | 1057.52 |
| 66.32 | 1109.53 |
| 66.33 | 1161.54 |
| 66.34 | 1005.51 |
| 66.35 | 1126.86 |
| 66.36 | 849.482 |
| 66.37 | 988.173 |
| 66.38 | 1265.56 |
| 66.39 | 884.155 |



|       |         |
|-------|---------|
| 66.4  | 918.828 |
| 66.41 | 1144.2  |
| 66.42 | 918.828 |
| 66.43 | 988.173 |
| 66.44 | 970.837 |
| 66.45 | 814.809 |
| 66.46 | 1109.53 |
| 66.47 | 884.155 |
| 66.48 | 1144.2  |
| 66.49 | 953.5   |
| 66.5  | 1109.53 |
| 66.51 | 1040.18 |
| 66.52 | 762.8   |
| 66.53 | 1248.22 |
| 66.54 | 936.164 |
| 66.55 | 693.455 |
| 66.56 | 866.819 |
| 66.57 | 1109.53 |
| 66.58 | 970.837 |
| 66.59 | 1074.85 |
| 66.6  | 1161.54 |
| 66.61 | 1040.18 |
| 66.62 | 988.173 |
| 66.63 | 814.809 |
| 66.64 | 901.491 |
| 66.65 | 1040.18 |
| 66.66 | 780.137 |
| 66.67 | 866.819 |
| 66.68 | 814.809 |
| 66.69 | 1040.18 |
| 66.7  | 1109.53 |
| 66.71 | 1074.85 |
| 66.72 | 988.173 |
| 66.73 | 936.164 |
| 66.74 | 797.473 |
| 66.75 | 1005.51 |
| 66.76 | 901.491 |
| 66.77 | 936.164 |
| 66.78 | 797.473 |
| 66.79 | 918.828 |
| 66.8  | 1005.51 |
| 66.81 | 953.5   |
| 66.82 | 797.473 |
| 66.83 | 1074.85 |

|       |         |
|-------|---------|
| 66.84 | 901.491 |
| 66.85 | 866.819 |
| 66.86 | 918.828 |
| 66.87 | 1040.18 |
| 66.88 | 797.473 |
| 66.89 | 1126.86 |
| 66.9  | 641.446 |
| 66.91 | 866.819 |
| 66.92 | 953.5   |
| 66.93 | 1005.51 |
| 66.94 | 832.146 |
| 66.95 | 970.837 |
| 66.96 | 970.837 |
| 66.97 | 970.837 |
| 66.98 | 1005.51 |
| 66.99 | 658.782 |
| 67    | 780.137 |
| 67.01 | 797.473 |
| 67.02 | 953.5   |
| 67.03 | 970.837 |
| 67.04 | 884.155 |
| 67.05 | 1057.52 |
| 67.06 | 953.5   |
| 67.07 | 970.837 |
| 67.08 | 1005.51 |
| 67.09 | 953.5   |
| 67.1  | 832.146 |
| 67.11 | 1040.18 |
| 67.12 | 1057.52 |
| 67.13 | 970.837 |
| 67.14 | 1074.85 |
| 67.15 | 1248.22 |
| 67.16 | 1126.86 |
| 67.17 | 849.482 |
| 67.18 | 866.819 |
| 67.19 | 780.137 |
| 67.2  | 1109.53 |
| 67.21 | 936.164 |
| 67.22 | 728.128 |
| 67.23 | 849.482 |
| 67.24 | 936.164 |
| 67.25 | 1092.19 |
| 67.26 | 849.482 |
| 67.27 | 901.491 |

|       |         |
|-------|---------|
| 67.28 | 762.8   |
| 67.29 | 728.128 |
| 67.3  | 693.455 |
| 67.31 | 745.464 |
| 67.32 | 728.128 |
| 67.33 | 849.482 |
| 67.34 | 1005.51 |
| 67.35 | 1057.52 |
| 67.36 | 970.837 |
| 67.37 | 901.491 |
| 67.38 | 762.8   |
| 67.39 | 936.164 |
| 67.4  | 1074.85 |
| 67.41 | 1092.19 |
| 67.42 | 901.491 |
| 67.43 | 936.164 |
| 67.44 | 936.164 |
| 67.45 | 849.482 |
| 67.46 | 832.146 |
| 67.47 | 1057.52 |
| 67.48 | 918.828 |
| 67.49 | 728.128 |
| 67.5  | 780.137 |
| 67.51 | 1040.18 |
| 67.52 | 1005.51 |
| 67.53 | 1144.2  |
| 67.54 | 988.173 |
| 67.55 | 1144.2  |
| 67.56 | 988.173 |
| 67.57 | 866.819 |
| 67.58 | 745.464 |
| 67.59 | 1092.19 |
| 67.6  | 849.482 |
| 67.61 | 918.828 |
| 67.62 | 762.8   |
| 67.63 | 1074.85 |
| 67.64 | 832.146 |
| 67.65 | 918.828 |
| 67.66 | 1092.19 |
| 67.67 | 1040.18 |
| 67.68 | 1040.18 |
| 67.69 | 901.491 |
| 67.7  | 832.146 |
| 67.71 | 797.473 |

|       |         |
|-------|---------|
| 67.72 | 953.5   |
| 67.73 | 849.482 |
| 67.74 | 936.164 |
| 67.75 | 936.164 |
| 67.76 | 1022.85 |
| 67.77 | 918.828 |
| 67.78 | 728.128 |
| 67.79 | 884.155 |
| 67.8  | 884.155 |
| 67.81 | 970.837 |
| 67.82 | 1144.2  |
| 67.83 | 988.173 |
| 67.84 | 918.828 |
| 67.85 | 936.164 |
| 67.86 | 884.155 |
| 67.87 | 884.155 |
| 67.88 | 849.482 |
| 67.89 | 797.473 |
| 67.9  | 953.5   |
| 67.91 | 780.137 |
| 67.92 | 797.473 |
| 67.93 | 849.482 |
| 67.94 | 849.482 |
| 67.95 | 988.173 |
| 67.96 | 797.473 |
| 67.97 | 918.828 |
| 67.98 | 797.473 |
| 67.99 | 901.491 |
| 68    | 918.828 |
| 68.01 | 936.164 |
| 68.02 | 918.828 |
| 68.03 | 866.819 |
| 68.04 | 918.828 |
| 68.05 | 936.164 |
| 68.06 | 953.5   |
| 68.07 | 1022.85 |
| 68.08 | 936.164 |
| 68.09 | 884.155 |
| 68.1  | 901.491 |
| 68.11 | 1040.18 |
| 68.12 | 1005.51 |
| 68.13 | 970.837 |
| 68.14 | 1040.18 |
| 68.15 | 1040.18 |

|       |         |
|-------|---------|
| 68.16 | 988.173 |
| 68.17 | 832.146 |
| 68.18 | 849.482 |
| 68.19 | 797.473 |
| 68.2  | 1040.18 |
| 68.21 | 866.819 |
| 68.22 | 1126.86 |
| 68.23 | 849.482 |
| 68.24 | 693.455 |
| 68.25 | 901.491 |
| 68.26 | 814.809 |
| 68.27 | 814.809 |
| 68.28 | 762.8   |
| 68.29 | 901.491 |
| 68.3  | 918.828 |
| 68.31 | 849.482 |
| 68.32 | 953.5   |
| 68.33 | 710.791 |
| 68.34 | 606.773 |
| 68.35 | 710.791 |
| 68.36 | 901.491 |
| 68.37 | 936.164 |
| 68.38 | 676.118 |
| 68.39 | 866.819 |
| 68.4  | 1005.51 |
| 68.41 | 918.828 |
| 68.42 | 953.5   |
| 68.43 | 1040.18 |
| 68.44 | 918.828 |
| 68.45 | 970.837 |
| 68.46 | 762.8   |
| 68.47 | 936.164 |
| 68.48 | 901.491 |
| 68.49 | 1040.18 |
| 68.5  | 745.464 |
| 68.51 | 901.491 |
| 68.52 | 849.482 |
| 68.53 | 953.5   |
| 68.54 | 728.128 |
| 68.55 | 762.8   |
| 68.56 | 762.8   |
| 68.57 | 762.8   |
| 68.58 | 710.791 |
| 68.59 | 1057.52 |

|       |         |
|-------|---------|
| 68.6  | 1109.53 |
| 68.61 | 849.482 |
| 68.62 | 1092.19 |
| 68.63 | 1092.19 |
| 68.64 | 936.164 |
| 68.65 | 1092.19 |
| 68.66 | 814.809 |
| 68.67 | 936.164 |
| 68.68 | 832.146 |
| 68.69 | 884.155 |
| 68.7  | 1074.85 |
| 68.71 | 832.146 |
| 68.72 | 988.173 |
| 68.73 | 936.164 |
| 68.74 | 936.164 |
| 68.75 | 1092.19 |
| 68.76 | 918.828 |
| 68.77 | 849.482 |
| 68.78 | 1092.19 |
| 68.79 | 814.809 |
| 68.8  | 901.491 |
| 68.81 | 918.828 |
| 68.82 | 832.146 |
| 68.83 | 849.482 |
| 68.84 | 1126.86 |
| 68.85 | 762.8   |
| 68.86 | 1022.85 |
| 68.87 | 988.173 |
| 68.88 | 1161.54 |
| 68.89 | 1126.86 |
| 68.9  | 762.8   |
| 68.91 | 988.173 |
| 68.92 | 953.5   |
| 68.93 | 953.5   |
| 68.94 | 745.464 |
| 68.95 | 1144.2  |
| 68.96 | 1005.51 |
| 68.97 | 970.837 |
| 68.98 | 1126.86 |
| 68.99 | 1005.51 |
| 69    | 1005.51 |
| 69.01 | 884.155 |
| 69.02 | 1074.85 |
| 69.03 | 849.482 |

|       |         |
|-------|---------|
| 69.04 | 1213.55 |
| 69.05 | 1352.24 |
| 69.06 | 1109.53 |
| 69.07 | 936.164 |
| 69.08 | 1109.53 |
| 69.09 | 918.828 |
| 69.1  | 1178.87 |
| 69.11 | 1161.54 |
| 69.12 | 1300.23 |
| 69.13 | 1525.6  |
| 69.14 | 1438.92 |
| 69.15 | 1594.95 |
| 69.16 | 1594.95 |
| 69.17 | 1490.93 |
| 69.18 | 1733.64 |
| 69.19 | 1733.64 |
| 69.2  | 2201.72 |
| 69.21 | 1924.34 |
| 69.22 | 2461.76 |
| 69.23 | 2583.12 |
| 69.24 | 2791.16 |
| 69.25 | 3103.21 |
| 69.26 | 2825.83 |
| 69.27 | 2947.18 |
| 69.28 | 2964.52 |
| 69.29 | 2825.83 |
| 69.3  | 2461.76 |
| 69.31 | 2305.74 |
| 69.32 | 2115.04 |
| 69.33 | 1768.31 |
| 69.34 | 1525.6  |
| 69.35 | 1698.96 |
| 69.36 | 1837.66 |
| 69.37 | 1907    |
| 69.38 | 1820.32 |
| 69.39 | 1560.27 |
| 69.4  | 1802.98 |
| 69.41 | 1664.29 |
| 69.42 | 1837.66 |
| 69.43 | 1594.95 |
| 69.44 | 1646.96 |
| 69.45 | 1993.68 |
| 69.46 | 1560.27 |
| 69.47 | 1924.34 |

|       |         |
|-------|---------|
| 69.48 | 2375.08 |
| 69.49 | 1941.67 |
| 69.5  | 1889.66 |
| 69.51 | 1802.98 |
| 69.52 | 1421.58 |
| 69.53 | 1508.26 |
| 69.54 | 1386.91 |
| 69.55 | 1352.24 |
| 69.56 | 953.5   |
| 69.57 | 936.164 |
| 69.58 | 1161.54 |
| 69.59 | 970.837 |
| 69.6  | 970.837 |
| 69.61 | 936.164 |
| 69.62 | 970.837 |
| 69.63 | 953.5   |
| 69.64 | 953.5   |
| 69.65 | 762.8   |
| 69.66 | 953.5   |
| 69.67 | 953.5   |
| 69.68 | 988.173 |
| 69.69 | 1022.85 |
| 69.7  | 1213.55 |
| 69.71 | 1074.85 |
| 69.72 | 936.164 |
| 69.73 | 866.819 |
| 69.74 | 1161.54 |
| 69.75 | 832.146 |
| 69.76 | 780.137 |
| 69.77 | 953.5   |
| 69.78 | 970.837 |
| 69.79 | 849.482 |
| 69.8  | 814.809 |
| 69.81 | 936.164 |
| 69.82 | 918.828 |
| 69.83 | 970.837 |
| 69.84 | 884.155 |
| 69.85 | 1092.19 |
| 69.86 | 953.5   |
| 69.87 | 1074.85 |
| 69.88 | 1196.21 |
| 69.89 | 988.173 |
| 69.9  | 1074.85 |
| 69.91 | 1057.52 |



|       |         |
|-------|---------|
| 69.92 | 1161.54 |
| 69.93 | 1144.2  |
| 69.94 | 953.5   |
| 69.95 | 1040.18 |
| 69.96 | 1144.2  |
| 69.97 | 1092.19 |
| 69.98 | 1040.18 |
| 69.99 | 1178.87 |
| 70    | 1092.19 |
| 70.01 | 1074.85 |
| 70.02 | 1317.56 |
| 70.03 | 1040.18 |
| 70.04 | 1074.85 |
| 70.05 | 1040.18 |
| 70.06 | 1196.21 |
| 70.07 | 1334.9  |
| 70.08 | 1369.57 |
| 70.09 | 1074.85 |
| 70.1  | 1438.92 |
| 70.11 | 1369.57 |
| 70.12 | 1456.26 |
| 70.13 | 1560.27 |
| 70.14 | 1733.64 |
| 70.15 | 1681.63 |
| 70.16 | 1802.98 |
| 70.17 | 1924.34 |
| 70.18 | 1993.68 |
| 70.19 | 2444.43 |
| 70.2  | 2201.72 |
| 70.21 | 2271.06 |
| 70.22 | 2253.73 |
| 70.23 | 2808.49 |
| 70.24 | 3137.88 |
| 70.25 | 2773.82 |
| 70.26 | 3293.91 |
| 70.27 | 3467.27 |
| 70.28 | 3744.66 |
| 70.29 | 3727.32 |
| 70.3  | 3918.02 |
| 70.31 | 3814    |
| 70.32 | 3675.31 |
| 70.33 | 4490.12 |
| 70.34 | 3467.27 |
| 70.35 | 3900.68 |

|       |         |
|-------|---------|
| 70.36 | 3640.64 |
| 70.37 | 3016.53 |
| 70.38 | 3068.54 |
| 70.39 | 2756.48 |
| 70.4  | 2704.47 |
| 70.41 | 2669.8  |
| 70.42 | 2652.46 |
| 70.43 | 2479.1  |
| 70.44 | 2305.74 |
| 70.45 | 2392.42 |
| 70.46 | 2669.8  |
| 70.47 | 2583.12 |
| 70.48 | 2427.09 |
| 70.49 | 2444.43 |
| 70.5  | 2513.77 |
| 70.51 | 2600.46 |
| 70.52 | 2444.43 |
| 70.53 | 2513.77 |
| 70.54 | 2253.73 |
| 70.55 | 2444.43 |
| 70.56 | 1854.99 |
| 70.57 | 2097.7  |
| 70.58 | 1924.34 |
| 70.59 | 1629.62 |
| 70.6  | 1820.32 |
| 70.61 | 1438.92 |
| 70.62 | 1334.9  |
| 70.63 | 1404.25 |
| 70.64 | 1213.55 |
| 70.65 | 1022.85 |
| 70.66 | 1109.53 |
| 70.67 | 1300.23 |
| 70.68 | 1161.54 |
| 70.69 | 1144.2  |
| 70.7  | 1230.88 |
| 70.71 | 1022.85 |
| 70.72 | 953.5   |
| 70.73 | 1178.87 |
| 70.74 | 1074.85 |
| 70.75 | 936.164 |
| 70.76 | 953.5   |
| 70.77 | 936.164 |
| 70.78 | 1109.53 |
| 70.79 | 970.837 |

|       |         |
|-------|---------|
| 70.8  | 1022.85 |
| 70.81 | 849.482 |
| 70.82 | 953.5   |
| 70.83 | 953.5   |
| 70.84 | 814.809 |
| 70.85 | 936.164 |
| 70.86 | 1022.85 |
| 70.87 | 814.809 |
| 70.88 | 728.128 |
| 70.89 | 780.137 |
| 70.9  | 953.5   |
| 70.91 | 988.173 |
| 70.92 | 918.828 |
| 70.93 | 849.482 |
| 70.94 | 884.155 |
| 70.95 | 832.146 |
| 70.96 | 1092.19 |
| 70.97 | 953.5   |
| 70.98 | 780.137 |
| 70.99 | 918.828 |
| 71    | 988.173 |
| 71.01 | 936.164 |
| 71.02 | 970.837 |
| 71.03 | 866.819 |
| 71.04 | 832.146 |
| 71.05 | 624.109 |
| 71.06 | 814.809 |
| 71.07 | 762.8   |
| 71.08 | 988.173 |
| 71.09 | 797.473 |
| 71.1  | 814.809 |
| 71.11 | 780.137 |
| 71.12 | 762.8   |
| 71.13 | 762.8   |
| 71.14 | 901.491 |
| 71.15 | 901.491 |
| 71.16 | 866.819 |
| 71.17 | 884.155 |
| 71.18 | 1005.51 |
| 71.19 | 849.482 |
| 71.2  | 953.5   |
| 71.21 | 624.109 |
| 71.22 | 658.782 |
| 71.23 | 745.464 |

71.24 936.164  
71.25 988.173  
71.26 814.809  
71.27 832.146  
71.28 901.491  
71.29 780.137  
71.3 797.473  
71.31 849.482  
71.32 814.809  
71.33 970.837  
71.34 710.791  
71.35 832.146  
71.36 988.173  
71.37 936.164  
71.38 780.137  
71.39 745.464  
71.4 1092.19  
71.41 762.8  
71.42 780.137  
71.43 884.155  
71.44 797.473  
71.45 832.146  
71.46 884.155  
71.47 762.8  
71.48 901.491  
71.49 866.819  
71.5 866.819  
71.51 780.137  
71.52 901.491  
71.53 762.8  
71.54 832.146  
71.55 710.791  
71.56 936.164  
71.57 936.164  
71.58 936.164  
71.59 901.491  
71.6 676.118  
71.61 918.828  
71.62 641.446  
71.63 745.464  
71.64 814.809  
71.65 901.491  
71.66 658.782  
71.67 780.137

|       |         |
|-------|---------|
| 71.68 | 710.791 |
| 71.69 | 814.809 |
| 71.7  | 710.791 |
| 71.71 | 710.791 |
| 71.72 | 866.819 |
| 71.73 | 936.164 |
| 71.74 | 884.155 |
| 71.75 | 832.146 |
| 71.76 | 762.8   |
| 71.77 | 901.491 |
| 71.78 | 762.8   |
| 71.79 | 728.128 |
| 71.8  | 970.837 |
| 71.81 | 832.146 |
| 71.82 | 918.828 |
| 71.83 | 676.118 |
| 71.84 | 641.446 |
| 71.85 | 884.155 |
| 71.86 | 953.5   |
| 71.87 | 780.137 |
| 71.88 | 693.455 |
| 71.89 | 658.782 |
| 71.9  | 780.137 |
| 71.91 | 832.146 |
| 71.92 | 901.491 |
| 71.93 | 1074.85 |
| 71.94 | 797.473 |
| 71.95 | 658.782 |
| 71.96 | 676.118 |
| 71.97 | 710.791 |
| 71.98 | 762.8   |
| 71.99 | 884.155 |
| 72    | 970.837 |
| 72.01 | 918.828 |
| 72.02 | 849.482 |
| 72.03 | 832.146 |
| 72.04 | 988.173 |
| 72.05 | 745.464 |
| 72.06 | 780.137 |
| 72.07 | 1144.2  |
| 72.08 | 832.146 |
| 72.09 | 762.8   |
| 72.1  | 797.473 |
| 72.11 | 728.128 |

|       |         |
|-------|---------|
| 72.12 | 780.137 |
| 72.13 | 814.809 |
| 72.14 | 728.128 |
| 72.15 | 832.146 |
| 72.16 | 970.837 |
| 72.17 | 884.155 |
| 72.18 | 676.118 |
| 72.19 | 970.837 |
| 72.2  | 866.819 |
| 72.21 | 676.118 |
| 72.22 | 832.146 |
| 72.23 | 693.455 |
| 72.24 | 641.446 |
| 72.25 | 1022.85 |
| 72.26 | 745.464 |
| 72.27 | 797.473 |
| 72.28 | 884.155 |
| 72.29 | 849.482 |
| 72.3  | 624.109 |
| 72.31 | 849.482 |
| 72.32 | 866.819 |
| 72.33 | 866.819 |
| 72.34 | 866.819 |
| 72.35 | 988.173 |
| 72.36 | 1005.51 |
| 72.37 | 884.155 |
| 72.38 | 988.173 |
| 72.39 | 988.173 |
| 72.4  | 1213.55 |
| 72.41 | 866.819 |
| 72.42 | 849.482 |
| 72.43 | 849.482 |
| 72.44 | 970.837 |
| 72.45 | 970.837 |
| 72.46 | 832.146 |
| 72.47 | 1092.19 |
| 72.48 | 918.828 |
| 72.49 | 1022.85 |
| 72.5  | 901.491 |
| 72.51 | 1248.22 |
| 72.52 | 849.482 |
| 72.53 | 780.137 |
| 72.54 | 832.146 |
| 72.55 | 953.5   |

|       |         |
|-------|---------|
| 72.56 | 1022.85 |
| 72.57 | 918.828 |
| 72.58 | 918.828 |
| 72.59 | 1057.52 |
| 72.6  | 780.137 |
| 72.61 | 1074.85 |
| 72.62 | 1074.85 |
| 72.63 | 1196.21 |
| 72.64 | 988.173 |
| 72.65 | 1109.53 |
| 72.66 | 1265.56 |
| 72.67 | 1161.54 |
| 72.68 | 1300.23 |
| 72.69 | 953.5   |
| 72.7  | 1213.55 |
| 72.71 | 1421.58 |
| 72.72 | 1334.9  |
| 72.73 | 1178.87 |
| 72.74 | 1282.89 |
| 72.75 | 1317.56 |
| 72.76 | 1421.58 |
| 72.77 | 1785.65 |
| 72.78 | 1386.91 |
| 72.79 | 1629.62 |
| 72.8  | 1976.35 |
| 72.81 | 1941.67 |
| 72.82 | 2028.36 |
| 72.83 | 2132.37 |
| 72.84 | 2652.46 |
| 72.85 | 2912.51 |
| 72.86 | 3120.55 |
| 72.87 | 2635.13 |
| 72.88 | 3189.89 |
| 72.89 | 3137.88 |
| 72.9  | 4039.37 |
| 72.91 | 3657.97 |
| 72.92 | 4160.73 |
| 72.93 | 4646.15 |
| 72.94 | 4576.8  |
| 72.95 | 4888.86 |
| 72.96 | 4542.13 |
| 72.97 | 4854.18 |
| 72.98 | 5287.59 |
| 72.99 | 5010.21 |

|       |         |
|-------|---------|
| 73    | 4888.86 |
| 73.01 | 4715.49 |
| 73.02 | 4490.12 |
| 73.03 | 4074.05 |
| 73.04 | 3709.98 |
| 73.05 | 3397.93 |
| 73.06 | 3085.87 |
| 73.07 | 3328.58 |
| 73.08 | 3241.9  |
| 73.09 | 3068.54 |
| 73.1  | 2704.47 |
| 73.11 | 2808.49 |
| 73.12 | 3207.23 |
| 73.13 | 3311.25 |
| 73.14 | 3172.56 |
| 73.15 | 3172.56 |
| 73.16 | 3172.56 |
| 73.17 | 2895.17 |
| 73.18 | 3172.56 |
| 73.19 | 2895.17 |
| 73.2  | 2895.17 |
| 73.21 | 2947.18 |
| 73.22 | 2548.45 |
| 73.23 | 2496.44 |
| 73.24 | 2271.06 |
| 73.25 | 2305.74 |
| 73.26 | 2149.71 |
| 73.27 | 1802.98 |
| 73.28 | 1733.64 |
| 73.29 | 1924.34 |
| 73.3  | 1508.26 |
| 73.31 | 1698.96 |
| 73.32 | 1404.25 |
| 73.33 | 1438.92 |
| 73.34 | 1300.23 |
| 73.35 | 1196.21 |
| 73.36 | 1213.55 |
| 73.37 | 1369.57 |
| 73.38 | 1109.53 |
| 73.39 | 1352.24 |
| 73.4  | 1438.92 |
| 73.41 | 953.5   |
| 73.42 | 1057.52 |
| 73.43 | 1092.19 |



|       |         |
|-------|---------|
| 73.44 | 901.491 |
| 73.45 | 1005.51 |
| 73.46 | 1178.87 |
| 73.47 | 936.164 |
| 73.48 | 1213.55 |
| 73.49 | 970.837 |
| 73.5  | 1334.9  |
| 73.51 | 1178.87 |
| 73.52 | 1161.54 |
| 73.53 | 1057.52 |
| 73.54 | 1005.51 |
| 73.55 | 1074.85 |
| 73.56 | 1178.87 |
| 73.57 | 1196.21 |
| 73.58 | 1144.2  |
| 73.59 | 1109.53 |
| 73.6  | 1352.24 |
| 73.61 | 1282.89 |
| 73.62 | 1230.88 |
| 73.63 | 1161.54 |
| 73.64 | 1404.25 |
| 73.65 | 1438.92 |
| 73.66 | 1594.95 |
| 73.67 | 1369.57 |
| 73.68 | 1334.9  |
| 73.69 | 1664.29 |
| 73.7  | 1750.97 |
| 73.71 | 1733.64 |
| 73.72 | 1820.32 |
| 73.73 | 1820.32 |
| 73.74 | 1924.34 |
| 73.75 | 2063.03 |
| 73.76 | 1820.32 |
| 73.77 | 1716.3  |
| 73.78 | 1854.99 |
| 73.79 | 1837.66 |
| 73.8  | 1369.57 |
| 73.81 | 1421.58 |
| 73.82 | 1334.9  |
| 73.83 | 1230.88 |
| 73.84 | 1508.26 |
| 73.85 | 988.173 |
| 73.86 | 1473.59 |
| 73.87 | 1230.88 |

|       |         |
|-------|---------|
| 73.88 | 1438.92 |
| 73.89 | 1317.56 |
| 73.9  | 1230.88 |
| 73.91 | 1230.88 |
| 73.92 | 1334.9  |
| 73.93 | 1404.25 |
| 73.94 | 1369.57 |
| 73.95 | 1300.23 |
| 73.96 | 1161.54 |
| 73.97 | 1178.87 |
| 73.98 | 1317.56 |
| 73.99 | 1473.59 |
| 74    | 1282.89 |
| 74.01 | 1352.24 |
| 74.02 | 1126.86 |
| 74.03 | 1109.53 |
| 74.04 | 1022.85 |
| 74.05 | 814.809 |
| 74.06 | 970.837 |
| 74.07 | 936.164 |
| 74.08 | 1074.85 |
| 74.09 | 1126.86 |
| 74.1  | 901.491 |
| 74.11 | 849.482 |
| 74.12 | 884.155 |
| 74.13 | 1074.85 |
| 74.14 | 936.164 |
| 74.15 | 1005.51 |
| 74.16 | 901.491 |
| 74.17 | 849.482 |
| 74.18 | 1057.52 |
| 74.19 | 1005.51 |
| 74.2  | 988.173 |
| 74.21 | 832.146 |
| 74.22 | 849.482 |
| 74.23 | 1040.18 |
| 74.24 | 884.155 |
| 74.25 | 814.809 |
| 74.26 | 884.155 |
| 74.27 | 901.491 |
| 74.28 | 884.155 |
| 74.29 | 832.146 |
| 74.3  | 1161.54 |
| 74.31 | 1005.51 |

|       |         |
|-------|---------|
| 74.32 | 1057.52 |
| 74.33 | 866.819 |
| 74.34 | 866.819 |
| 74.35 | 814.809 |
| 74.36 | 1074.85 |
| 74.37 | 797.473 |
| 74.38 | 970.837 |
| 74.39 | 797.473 |
| 74.4  | 970.837 |
| 74.41 | 953.5   |
| 74.42 | 866.819 |
| 74.43 | 485.418 |
| 74.44 | 988.173 |
| 74.45 | 936.164 |
| 74.46 | 832.146 |
| 74.47 | 988.173 |
| 74.48 | 676.118 |
| 74.49 | 797.473 |
| 74.5  | 762.8   |
| 74.51 | 953.5   |
| 74.52 | 849.482 |
| 74.53 | 884.155 |
| 74.54 | 814.809 |
| 74.55 | 745.464 |
| 74.56 | 797.473 |
| 74.57 | 1022.85 |
| 74.58 | 884.155 |
| 74.59 | 745.464 |
| 74.6  | 797.473 |
| 74.61 | 866.819 |
| 74.62 | 693.455 |
| 74.63 | 797.473 |
| 74.64 | 918.828 |
| 74.65 | 780.137 |
| 74.66 | 624.109 |
| 74.67 | 728.128 |
| 74.68 | 780.137 |
| 74.69 | 936.164 |
| 74.7  | 745.464 |
| 74.71 | 814.809 |
| 74.72 | 918.828 |
| 74.73 | 797.473 |
| 74.74 | 901.491 |
| 74.75 | 814.809 |

|       |         |
|-------|---------|
| 74.76 | 745.464 |
| 74.77 | 849.482 |
| 74.78 | 832.146 |
| 74.79 | 710.791 |
| 74.8  | 797.473 |
| 74.81 | 901.491 |
| 74.82 | 624.109 |
| 74.83 | 780.137 |
| 74.84 | 866.819 |
| 74.85 | 884.155 |
| 74.86 | 797.473 |
| 74.87 | 970.837 |
| 74.88 | 901.491 |
| 74.89 | 710.791 |
| 74.9  | 832.146 |
| 74.91 | 849.482 |
| 74.92 | 780.137 |
| 74.93 | 693.455 |
| 74.94 | 814.809 |
| 74.95 | 849.482 |
| 74.96 | 849.482 |
| 74.97 | 953.5   |
| 74.98 | 936.164 |
| 74.99 | 849.482 |
| 75    | 780.137 |
| 75.01 | 572.1   |
| 75.02 | 676.118 |
| 75.03 | 606.773 |
| 75.04 | 953.5   |
| 75.05 | 728.128 |
| 75.06 | 797.473 |
| 75.07 | 884.155 |
| 75.08 | 1040.18 |
| 75.09 | 797.473 |
| 75.1  | 970.837 |
| 75.11 | 970.837 |
| 75.12 | 797.473 |
| 75.13 | 953.5   |
| 75.14 | 918.828 |
| 75.15 | 884.155 |
| 75.16 | 1092.19 |
| 75.17 | 814.809 |
| 75.18 | 832.146 |
| 75.19 | 676.118 |

|       |         |
|-------|---------|
| 75.2  | 641.446 |
| 75.21 | 780.137 |
| 75.22 | 710.791 |
| 75.23 | 780.137 |
| 75.24 | 849.482 |
| 75.25 | 849.482 |
| 75.26 | 762.8   |
| 75.27 | 728.128 |
| 75.28 | 1005.51 |
| 75.29 | 1074.85 |
| 75.3  | 745.464 |
| 75.31 | 1022.85 |
| 75.32 | 832.146 |
| 75.33 | 918.828 |
| 75.34 | 849.482 |
| 75.35 | 1074.85 |
| 75.36 | 693.455 |
| 75.37 | 970.837 |
| 75.38 | 1022.85 |
| 75.39 | 797.473 |
| 75.4  | 918.828 |
| 75.41 | 918.828 |
| 75.42 | 866.819 |
| 75.43 | 1057.52 |
| 75.44 | 693.455 |
| 75.45 | 762.8   |
| 75.46 | 901.491 |
| 75.47 | 970.837 |
| 75.48 | 1005.51 |
| 75.49 | 814.809 |
| 75.5  | 953.5   |
| 75.51 | 710.791 |
| 75.52 | 641.446 |
| 75.53 | 676.118 |
| 75.54 | 710.791 |
| 75.55 | 849.482 |
| 75.56 | 762.8   |
| 75.57 | 676.118 |
| 75.58 | 849.482 |
| 75.59 | 832.146 |
| 75.6  | 936.164 |
| 75.61 | 866.819 |
| 75.62 | 832.146 |
| 75.63 | 1040.18 |

|       |         |
|-------|---------|
| 75.64 | 814.809 |
| 75.65 | 728.128 |
| 75.66 | 884.155 |
| 75.67 | 970.837 |
| 75.68 | 901.491 |
| 75.69 | 884.155 |
| 75.7  | 901.491 |
| 75.71 | 1022.85 |
| 75.72 | 762.8   |
| 75.73 | 676.118 |
| 75.74 | 814.809 |
| 75.75 | 728.128 |
| 75.76 | 849.482 |
| 75.77 | 918.828 |
| 75.78 | 832.146 |
| 75.79 | 797.473 |
| 75.8  | 970.837 |
| 75.81 | 832.146 |
| 75.82 | 936.164 |
| 75.83 | 780.137 |
| 75.84 | 693.455 |
| 75.85 | 728.128 |
| 75.86 | 814.809 |
| 75.87 | 884.155 |
| 75.88 | 988.173 |
| 75.89 | 866.819 |
| 75.9  | 988.173 |
| 75.91 | 728.128 |
| 75.92 | 780.137 |
| 75.93 | 1109.53 |
| 75.94 | 936.164 |
| 75.95 | 1022.85 |
| 75.96 | 728.128 |
| 75.97 | 745.464 |
| 75.98 | 728.128 |
| 75.99 | 884.155 |
| 76    | 918.828 |
| 76.01 | 849.482 |
| 76.02 | 814.809 |
| 76.03 | 918.828 |
| 76.04 | 832.146 |
| 76.05 | 832.146 |
| 76.06 | 936.164 |
| 76.07 | 797.473 |

|       |         |
|-------|---------|
| 76.08 | 1005.51 |
| 76.09 | 762.8   |
| 76.1  | 901.491 |
| 76.11 | 1040.18 |
| 76.12 | 970.837 |
| 76.13 | 1161.54 |
| 76.14 | 1126.86 |
| 76.15 | 1178.87 |
| 76.16 | 1074.85 |
| 76.17 | 1178.87 |
| 76.18 | 1005.51 |
| 76.19 | 1161.54 |
| 76.2  | 1161.54 |
| 76.21 | 884.155 |
| 76.22 | 1300.23 |
| 76.23 | 1230.88 |
| 76.24 | 1057.52 |
| 76.25 | 1542.94 |
| 76.26 | 1716.3  |
| 76.27 | 1785.65 |
| 76.28 | 2080.36 |
| 76.29 | 2201.72 |
| 76.3  | 1837.66 |
| 76.31 | 2063.03 |
| 76.32 | 2305.74 |
| 76.33 | 2617.79 |
| 76.34 | 2721.81 |
| 76.35 | 2635.13 |
| 76.36 | 2340.41 |
| 76.37 | 2600.46 |
| 76.38 | 2513.77 |
| 76.39 | 2305.74 |
| 76.4  | 2097.7  |
| 76.41 | 2132.37 |
| 76.42 | 1993.68 |
| 76.43 | 2011.02 |
| 76.44 | 1820.32 |
| 76.45 | 1768.31 |
| 76.46 | 1646.96 |
| 76.47 | 1386.91 |
| 76.48 | 1698.96 |
| 76.49 | 1612.28 |
| 76.5  | 1525.6  |
| 76.51 | 1907    |

|       |         |
|-------|---------|
| 76.52 | 1594.95 |
| 76.53 | 1976.35 |
| 76.54 | 1698.96 |
| 76.55 | 1889.66 |
| 76.56 | 1733.64 |
| 76.57 | 1959.01 |
| 76.58 | 2028.36 |
| 76.59 | 1560.27 |
| 76.6  | 1664.29 |
| 76.61 | 1802.98 |
| 76.62 | 1629.62 |
| 76.63 | 1594.95 |
| 76.64 | 1525.6  |
| 76.65 | 1178.87 |
| 76.66 | 1196.21 |
| 76.67 | 1230.88 |
| 76.68 | 1438.92 |
| 76.69 | 1057.52 |
| 76.7  | 1057.52 |
| 76.71 | 1161.54 |
| 76.72 | 1213.55 |
| 76.73 | 1057.52 |
| 76.74 | 1178.87 |
| 76.75 | 1109.53 |
| 76.76 | 1040.18 |
| 76.77 | 1334.9  |
| 76.78 | 936.164 |
| 76.79 | 832.146 |
| 76.8  | 901.491 |
| 76.81 | 1213.55 |
| 76.82 | 1109.53 |
| 76.83 | 1109.53 |
| 76.84 | 1144.2  |
| 76.85 | 832.146 |
| 76.86 | 1005.51 |
| 76.87 | 1109.53 |
| 76.88 | 1040.18 |
| 76.89 | 1213.55 |
| 76.9  | 1022.85 |
| 76.91 | 1265.56 |
| 76.92 | 1161.54 |
| 76.93 | 1282.89 |
| 76.94 | 988.173 |
| 76.95 | 1057.52 |



|       |         |
|-------|---------|
| 76.96 | 1178.87 |
| 76.97 | 1126.86 |
| 76.98 | 1300.23 |
| 76.99 | 1369.57 |
| 77    | 1334.9  |
| 77.01 | 1386.91 |
| 77.02 | 1525.6  |
| 77.03 | 1594.95 |
| 77.04 | 1629.62 |
| 77.05 | 1959.01 |
| 77.06 | 1612.28 |
| 77.07 | 1750.97 |
| 77.08 | 1820.32 |
| 77.09 | 2236.39 |
| 77.1  | 2305.74 |
| 77.11 | 1993.68 |
| 77.12 | 2548.45 |
| 77.13 | 2496.44 |
| 77.14 | 3033.86 |
| 77.15 | 3068.54 |
| 77.16 | 3311.25 |
| 77.17 | 3623.3  |
| 77.18 | 4039.37 |
| 77.19 | 4178.07 |
| 77.2  | 4143.39 |
| 77.21 | 4004.7  |
| 77.22 | 3796.67 |
| 77.23 | 4351.43 |
| 77.24 | 3779.33 |
| 77.25 | 4039.37 |
| 77.26 | 3935.36 |
| 77.27 | 3692.65 |
| 77.28 | 3605.97 |
| 77.29 | 2825.83 |
| 77.3  | 2600.46 |
| 77.31 | 2617.79 |
| 77.32 | 2513.77 |
| 77.33 | 2409.76 |
| 77.34 | 2773.82 |
| 77.35 | 2496.44 |
| 77.36 | 2340.41 |
| 77.37 | 2461.76 |
| 77.38 | 2357.75 |
| 77.39 | 2496.44 |

|       |         |
|-------|---------|
| 77.4  | 2617.79 |
| 77.41 | 2704.47 |
| 77.42 | 2877.84 |
| 77.43 | 3224.56 |
| 77.44 | 2704.47 |
| 77.45 | 2721.81 |
| 77.46 | 2635.13 |
| 77.47 | 2808.49 |
| 77.48 | 2652.46 |
| 77.49 | 2201.72 |
| 77.5  | 1941.67 |
| 77.51 | 2080.36 |
| 77.52 | 1872.33 |
| 77.53 | 1716.3  |
| 77.54 | 1560.27 |
| 77.55 | 1421.58 |
| 77.56 | 1300.23 |
| 77.57 | 1404.25 |
| 77.58 | 1421.58 |
| 77.59 | 1386.91 |
| 77.6  | 1577.61 |
| 77.61 | 1178.87 |
| 77.62 | 1178.87 |
| 77.63 | 1074.85 |
| 77.64 | 1109.53 |
| 77.65 | 1213.55 |
| 77.66 | 1109.53 |
| 77.67 | 1109.53 |
| 77.68 | 1057.52 |
| 77.69 | 1074.85 |
| 77.7  | 832.146 |
| 77.71 | 918.828 |
| 77.72 | 814.809 |
| 77.73 | 866.819 |
| 77.74 | 728.128 |
| 77.75 | 936.164 |
| 77.76 | 1109.53 |
| 77.77 | 884.155 |
| 77.78 | 866.819 |
| 77.79 | 866.819 |
| 77.8  | 797.473 |
| 77.81 | 970.837 |
| 77.82 | 884.155 |
| 77.83 | 797.473 |

|       |         |
|-------|---------|
| 77.84 | 797.473 |
| 77.85 | 988.173 |
| 77.86 | 1040.18 |
| 77.87 | 866.819 |
| 77.88 | 970.837 |
| 77.89 | 849.482 |
| 77.9  | 918.828 |
| 77.91 | 918.828 |
| 77.92 | 797.473 |
| 77.93 | 606.773 |
| 77.94 | 814.809 |
| 77.95 | 918.828 |
| 77.96 | 849.482 |
| 77.97 | 970.837 |
| 77.98 | 953.5   |
| 77.99 | 832.146 |
| 78    | 936.164 |
| 78.01 | 988.173 |
| 78.02 | 970.837 |
| 78.03 | 884.155 |
| 78.04 | 745.464 |
| 78.05 | 866.819 |
| 78.06 | 728.128 |
| 78.07 | 832.146 |
| 78.08 | 676.118 |
| 78.09 | 1022.85 |
| 78.1  | 745.464 |
| 78.11 | 658.782 |
| 78.12 | 728.128 |
| 78.13 | 866.819 |
| 78.14 | 728.128 |
| 78.15 | 797.473 |
| 78.16 | 676.118 |
| 78.17 | 728.128 |
| 78.18 | 1057.52 |
| 78.19 | 814.809 |
| 78.2  | 866.819 |
| 78.21 | 901.491 |
| 78.22 | 728.128 |
| 78.23 | 814.809 |
| 78.24 | 780.137 |
| 78.25 | 762.8   |
| 78.26 | 953.5   |
| 78.27 | 537.427 |

|       |         |
|-------|---------|
| 78.28 | 693.455 |
| 78.29 | 814.809 |
| 78.3  | 676.118 |
| 78.31 | 780.137 |
| 78.32 | 728.128 |
| 78.33 | 866.819 |
| 78.34 | 832.146 |
| 78.35 | 797.473 |
| 78.36 | 970.837 |
| 78.37 | 1057.52 |
| 78.38 | 953.5   |
| 78.39 | 953.5   |
| 78.4  | 762.8   |
| 78.41 | 780.137 |
| 78.42 | 1040.18 |
| 78.43 | 814.809 |
| 78.44 | 866.819 |
| 78.45 | 762.8   |
| 78.46 | 901.491 |
| 78.47 | 728.128 |
| 78.48 | 554.764 |
| 78.49 | 953.5   |
| 78.5  | 901.491 |
| 78.51 | 797.473 |
| 78.52 | 988.173 |
| 78.53 | 901.491 |
| 78.54 | 693.455 |
| 78.55 | 849.482 |
| 78.56 | 797.473 |
| 78.57 | 918.828 |
| 78.58 | 710.791 |
| 78.59 | 797.473 |
| 78.6  | 832.146 |
| 78.61 | 849.482 |
| 78.62 | 849.482 |
| 78.63 | 797.473 |
| 78.64 | 832.146 |
| 78.65 | 797.473 |
| 78.66 | 728.128 |
| 78.67 | 901.491 |
| 78.68 | 901.491 |
| 78.69 | 745.464 |
| 78.7  | 832.146 |
| 78.71 | 866.819 |

|       |         |
|-------|---------|
| 78.72 | 624.109 |
| 78.73 | 762.8   |
| 78.74 | 762.8   |
| 78.75 | 762.8   |
| 78.76 | 866.819 |
| 78.77 | 866.819 |
| 78.78 | 745.464 |
| 78.79 | 918.828 |
| 78.8  | 866.819 |
| 78.81 | 832.146 |
| 78.82 | 728.128 |
| 78.83 | 866.819 |
| 78.84 | 676.118 |
| 78.85 | 728.128 |
| 78.86 | 832.146 |
| 78.87 | 606.773 |
| 78.88 | 797.473 |
| 78.89 | 780.137 |
| 78.9  | 710.791 |
| 78.91 | 710.791 |
| 78.92 | 676.118 |
| 78.93 | 866.819 |
| 78.94 | 866.819 |
| 78.95 | 658.782 |
| 78.96 | 762.8   |
| 78.97 | 710.791 |
| 78.98 | 658.782 |
| 78.99 | 780.137 |
| 79    | 762.8   |
| 79.01 | 676.118 |
| 79.02 | 728.128 |
| 79.03 | 866.819 |
| 79.04 | 970.837 |
| 79.05 | 936.164 |
| 79.06 | 832.146 |
| 79.07 | 762.8   |
| 79.08 | 710.791 |
| 79.09 | 745.464 |
| 79.1  | 710.791 |
| 79.11 | 953.5   |
| 79.12 | 849.482 |
| 79.13 | 710.791 |
| 79.14 | 797.473 |
| 79.15 | 762.8   |

|       |         |
|-------|---------|
| 79.16 | 745.464 |
| 79.17 | 884.155 |
| 79.18 | 1092.19 |
| 79.19 | 780.137 |
| 79.2  | 918.828 |
| 79.21 | 780.137 |
| 79.22 | 676.118 |
| 79.23 | 676.118 |
| 79.24 | 953.5   |
| 79.25 | 849.482 |
| 79.26 | 762.8   |
| 79.27 | 1092.19 |
| 79.28 | 780.137 |
| 79.29 | 953.5   |
| 79.3  | 676.118 |
| 79.31 | 676.118 |
| 79.32 | 710.791 |
| 79.33 | 676.118 |
| 79.34 | 554.764 |
| 79.35 | 710.791 |
| 79.36 | 832.146 |
| 79.37 | 745.464 |
| 79.38 | 589.437 |
| 79.39 | 745.464 |
| 79.4  | 866.819 |
| 79.41 | 728.128 |
| 79.42 | 745.464 |
| 79.43 | 849.482 |
| 79.44 | 780.137 |
| 79.45 | 797.473 |
| 79.46 | 641.446 |
| 79.47 | 641.446 |
| 79.48 | 693.455 |
| 79.49 | 814.809 |
| 79.5  | 641.446 |
| 79.51 | 832.146 |
| 79.52 | 832.146 |
| 79.53 | 814.809 |
| 79.54 | 884.155 |
| 79.55 | 728.128 |
| 79.56 | 849.482 |
| 79.57 | 693.455 |
| 79.58 | 745.464 |
| 79.59 | 832.146 |

|       |         |
|-------|---------|
| 79.6  | 814.809 |
| 79.61 | 606.773 |
| 79.62 | 710.791 |
| 79.63 | 780.137 |
| 79.64 | 814.809 |
| 79.65 | 849.482 |
| 79.66 | 866.819 |
| 79.67 | 814.809 |
| 79.68 | 676.118 |
| 79.69 | 780.137 |
| 79.7  | 641.446 |
| 79.71 | 832.146 |
| 79.72 | 814.809 |
| 79.73 | 728.128 |
| 79.74 | 814.809 |
| 79.75 | 728.128 |
| 79.76 | 728.128 |
| 79.77 | 728.128 |
| 79.78 | 780.137 |
| 79.79 | 988.173 |
| 79.8  | 953.5   |
| 79.81 | 901.491 |
| 79.82 | 762.8   |
| 79.83 | 797.473 |
| 79.84 | 658.782 |
| 79.85 | 814.809 |
| 79.86 | 814.809 |
| 79.87 | 624.109 |
| 79.88 | 901.491 |
| 79.89 | 866.819 |
| 79.9  | 606.773 |
| 79.91 | 832.146 |
| 79.92 | 918.828 |
| 79.93 | 849.482 |
| 79.94 | 866.819 |
| 79.95 | 797.473 |
| 79.96 | 641.446 |
| 79.97 | 762.8   |
| 79.98 | 624.109 |
| 79.99 | 901.491 |
| 80    | 936.164 |
| 80.01 | 970.837 |
| 80.02 | 780.137 |
| 80.03 | 814.809 |

|       |         |
|-------|---------|
| 80.04 | 658.782 |
| 80.05 | 658.782 |
| 80.06 | 658.782 |
| 80.07 | 814.809 |
| 80.08 | 676.118 |
| 80.09 | 624.109 |
| 80.1  | 693.455 |
| 80.11 | 658.782 |
| 80.12 | 953.5   |
| 80.13 | 849.482 |
| 80.14 | 710.791 |
| 80.15 | 710.791 |
| 80.16 | 589.437 |
| 80.17 | 676.118 |
| 80.18 | 866.819 |
| 80.19 | 988.173 |
| 80.2  | 849.482 |
| 80.21 | 901.491 |
| 80.22 | 884.155 |
| 80.23 | 832.146 |
| 80.24 | 814.809 |
| 80.25 | 728.128 |
| 80.26 | 762.8   |
| 80.27 | 745.464 |
| 80.28 | 953.5   |
| 80.29 | 1005.51 |
| 80.3  | 797.473 |
| 80.31 | 884.155 |
| 80.32 | 676.118 |
| 80.33 | 728.128 |
| 80.34 | 884.155 |
| 80.35 | 970.837 |
| 80.36 | 814.809 |
| 80.37 | 728.128 |
| 80.38 | 797.473 |
| 80.39 | 1057.52 |
| 80.4  | 797.473 |
| 80.41 | 918.828 |
| 80.42 | 814.809 |
| 80.43 | 832.146 |
| 80.44 | 832.146 |
| 80.45 | 970.837 |
| 80.46 | 780.137 |
| 80.47 | 970.837 |



|       |         |
|-------|---------|
| 80.48 | 780.137 |
| 80.49 | 762.8   |
| 80.5  | 814.809 |
| 80.51 | 970.837 |
| 80.52 | 1057.52 |
| 80.53 | 676.118 |
| 80.54 | 901.491 |
| 80.55 | 953.5   |
| 80.56 | 884.155 |
| 80.57 | 745.464 |
| 80.58 | 710.791 |
| 80.59 | 1005.51 |
| 80.6  | 849.482 |
| 80.61 | 814.809 |
| 80.62 | 884.155 |
| 80.63 | 762.8   |
| 80.64 | 884.155 |
| 80.65 | 797.473 |
| 80.66 | 797.473 |
| 80.67 | 797.473 |
| 80.68 | 901.491 |
| 80.69 | 728.128 |
| 80.7  | 728.128 |
| 80.71 | 901.491 |
| 80.72 | 849.482 |
| 80.73 | 814.809 |
| 80.74 | 780.137 |
| 80.75 | 849.482 |
| 80.76 | 780.137 |
| 80.77 | 901.491 |
| 80.78 | 814.809 |
| 80.79 | 866.819 |
| 80.8  | 901.491 |
| 80.81 | 918.828 |
| 80.82 | 849.482 |
| 80.83 | 1057.52 |
| 80.84 | 970.837 |
| 80.85 | 936.164 |
| 80.86 | 745.464 |
| 80.87 | 1126.86 |
| 80.88 | 849.482 |
| 80.89 | 1022.85 |
| 80.9  | 936.164 |
| 80.91 | 1178.87 |

|       |         |
|-------|---------|
| 80.92 | 1161.54 |
| 80.93 | 1040.18 |
| 80.94 | 1404.25 |
| 80.95 | 1178.87 |
| 80.96 | 1490.93 |
| 80.97 | 1473.59 |
| 80.98 | 1386.91 |
| 80.99 | 1456.26 |
| 81    | 1750.97 |
| 81.01 | 1612.28 |
| 81.02 | 1733.64 |
| 81.03 | 1681.63 |
| 81.04 | 1802.98 |
| 81.05 | 1386.91 |
| 81.06 | 1490.93 |
| 81.07 | 1404.25 |
| 81.08 | 1161.54 |
| 81.09 | 1282.89 |
| 81.1  | 1456.26 |
| 81.11 | 1230.88 |
| 81.12 | 1057.52 |
| 81.13 | 1265.56 |
| 81.14 | 1213.55 |
| 81.15 | 1161.54 |
| 81.16 | 1230.88 |
| 81.17 | 988.173 |
| 81.18 | 1178.87 |
| 81.19 | 1317.56 |
| 81.2  | 1282.89 |
| 81.21 | 1248.22 |
| 81.22 | 1421.58 |
| 81.23 | 1126.86 |
| 81.24 | 1178.87 |
| 81.25 | 1300.23 |
| 81.26 | 1300.23 |
| 81.27 | 1560.27 |
| 81.28 | 1334.9  |
| 81.29 | 1525.6  |
| 81.3  | 1248.22 |
| 81.31 | 1248.22 |
| 81.32 | 1473.59 |
| 81.33 | 1317.56 |
| 81.34 | 1352.24 |
| 81.35 | 1352.24 |

|       |         |
|-------|---------|
| 81.36 | 1230.88 |
| 81.37 | 1178.87 |
| 81.38 | 1369.57 |
| 81.39 | 1577.61 |
| 81.4  | 1577.61 |
| 81.41 | 1542.94 |
| 81.42 | 1646.96 |
| 81.43 | 2011.02 |
| 81.44 | 1976.35 |
| 81.45 | 2167.05 |
| 81.46 | 1941.67 |
| 81.47 | 2115.04 |
| 81.48 | 2461.76 |
| 81.49 | 2271.06 |
| 81.5  | 2929.85 |
| 81.51 | 2825.83 |
| 81.52 | 3345.92 |
| 81.53 | 3363.26 |
| 81.54 | 3779.33 |
| 81.55 | 3848.67 |
| 81.56 | 3900.68 |
| 81.57 | 4611.47 |
| 81.58 | 4646.15 |
| 81.59 | 4403.44 |
| 81.6  | 4022.04 |
| 81.61 | 4247.41 |
| 81.62 | 4247.41 |
| 81.63 | 3380.59 |
| 81.64 | 3085.87 |
| 81.65 | 3397.93 |
| 81.66 | 3051.2  |
| 81.67 | 2808.49 |
| 81.68 | 2929.85 |
| 81.69 | 2617.79 |
| 81.7  | 2271.06 |
| 81.71 | 2184.38 |
| 81.72 | 2392.42 |
| 81.73 | 2375.08 |
| 81.74 | 2444.43 |
| 81.75 | 2219.06 |
| 81.76 | 2652.46 |
| 81.77 | 2253.73 |
| 81.78 | 2565.78 |
| 81.79 | 2704.47 |

|       |         |
|-------|---------|
| 81.8  | 2947.18 |
| 81.81 | 2773.82 |
| 81.82 | 2461.76 |
| 81.83 | 2565.78 |
| 81.84 | 2877.84 |
| 81.85 | 2999.19 |
| 81.86 | 2392.42 |
| 81.87 | 2496.44 |
| 81.88 | 2028.36 |
| 81.89 | 2063.03 |
| 81.9  | 2184.38 |
| 81.91 | 1386.91 |
| 81.92 | 1889.66 |
| 81.93 | 1802.98 |
| 81.94 | 1889.66 |
| 81.95 | 1508.26 |
| 81.96 | 1369.57 |
| 81.97 | 1542.94 |
| 81.98 | 1248.22 |
| 81.99 | 1178.87 |
| 82    | 1317.56 |
| 82.01 | 1282.89 |
| 82.02 | 1126.86 |
| 82.03 | 1109.53 |
| 82.04 | 1473.59 |
| 82.05 | 1438.92 |
| 82.06 | 1542.94 |
| 82.07 | 1421.58 |
| 82.08 | 1456.26 |
| 82.09 | 1490.93 |
| 82.1  | 1369.57 |
| 82.11 | 1560.27 |
| 82.12 | 1438.92 |
| 82.13 | 1456.26 |
| 82.14 | 1404.25 |
| 82.15 | 1334.9  |
| 82.16 | 1404.25 |
| 82.17 | 1317.56 |
| 82.18 | 1473.59 |
| 82.19 | 1161.54 |
| 82.2  | 1473.59 |
| 82.21 | 1074.85 |
| 82.22 | 1282.89 |
| 82.23 | 1230.88 |

|       |         |
|-------|---------|
| 82.24 | 1126.86 |
| 82.25 | 1282.89 |
| 82.26 | 1317.56 |
| 82.27 | 1230.88 |
| 82.28 | 1144.2  |
| 82.29 | 1196.21 |
| 82.3  | 1144.2  |
| 82.31 | 1196.21 |
| 82.32 | 1005.51 |
| 82.33 | 1144.2  |
| 82.34 | 1282.89 |
| 82.35 | 918.828 |
| 82.36 | 1092.19 |
| 82.37 | 1178.87 |
| 82.38 | 1612.28 |
| 82.39 | 970.837 |
| 82.4  | 1005.51 |
| 82.41 | 1213.55 |
| 82.42 | 1057.52 |
| 82.43 | 1092.19 |
| 82.44 | 988.173 |
| 82.45 | 1144.2  |
| 82.46 | 918.828 |
| 82.47 | 970.837 |
| 82.48 | 1092.19 |
| 82.49 | 1005.51 |
| 82.5  | 953.5   |
| 82.51 | 1109.53 |
| 82.52 | 953.5   |
| 82.53 | 1074.85 |
| 82.54 | 970.837 |
| 82.55 | 953.5   |
| 82.56 | 728.128 |
| 82.57 | 1005.51 |
| 82.58 | 936.164 |
| 82.59 | 936.164 |
| 82.6  | 780.137 |
| 82.61 | 849.482 |
| 82.62 | 918.828 |
| 82.63 | 1074.85 |
| 82.64 | 1057.52 |
| 82.65 | 606.773 |
| 82.66 | 866.819 |
| 82.67 | 936.164 |

|       |         |
|-------|---------|
| 82.68 | 901.491 |
| 82.69 | 797.473 |
| 82.7  | 918.828 |
| 82.71 | 762.8   |
| 82.72 | 814.809 |
| 82.73 | 624.109 |
| 82.74 | 728.128 |
| 82.75 | 832.146 |
| 82.76 | 988.173 |
| 82.77 | 658.782 |
| 82.78 | 780.137 |
| 82.79 | 780.137 |
| 82.8  | 988.173 |
| 82.81 | 970.837 |
| 82.82 | 780.137 |
| 82.83 | 1057.52 |
| 82.84 | 849.482 |
| 82.85 | 849.482 |
| 82.86 | 658.782 |
| 82.87 | 745.464 |
| 82.88 | 728.128 |
| 82.89 | 1005.51 |
| 82.9  | 970.837 |
| 82.91 | 1022.85 |
| 82.92 | 606.773 |
| 82.93 | 710.791 |
| 82.94 | 658.782 |
| 82.95 | 710.791 |
| 82.96 | 728.128 |
| 82.97 | 780.137 |
| 82.98 | 884.155 |
| 82.99 | 849.482 |
| 83    | 832.146 |
| 83.01 | 1092.19 |
| 83.02 | 728.128 |
| 83.03 | 693.455 |
| 83.04 | 762.8   |
| 83.05 | 1022.85 |
| 83.06 | 866.819 |
| 83.07 | 988.173 |
| 83.08 | 970.837 |
| 83.09 | 849.482 |
| 83.1  | 953.5   |
| 83.11 | 953.5   |

|       |         |
|-------|---------|
| 83.12 | 693.455 |
| 83.13 | 693.455 |
| 83.14 | 1022.85 |
| 83.15 | 1022.85 |
| 83.16 | 1213.55 |
| 83.17 | 710.791 |
| 83.18 | 970.837 |
| 83.19 | 762.8   |
| 83.2  | 988.173 |
| 83.21 | 970.837 |
| 83.22 | 832.146 |
| 83.23 | 970.837 |
| 83.24 | 780.137 |
| 83.25 | 918.828 |
| 83.26 | 953.5   |
| 83.27 | 693.455 |
| 83.28 | 1005.51 |
| 83.29 | 936.164 |
| 83.3  | 988.173 |
| 83.31 | 901.491 |
| 83.32 | 953.5   |
| 83.33 | 1074.85 |
| 83.34 | 866.819 |
| 83.35 | 1109.53 |
| 83.36 | 970.837 |
| 83.37 | 1005.51 |
| 83.38 | 970.837 |
| 83.39 | 953.5   |
| 83.4  | 1074.85 |
| 83.41 | 936.164 |
| 83.42 | 953.5   |
| 83.43 | 1248.22 |
| 83.44 | 918.828 |
| 83.45 | 970.837 |
| 83.46 | 1040.18 |
| 83.47 | 1213.55 |
| 83.48 | 1144.2  |
| 83.49 | 970.837 |
| 83.5  | 1334.9  |
| 83.51 | 1300.23 |
| 83.52 | 1265.56 |
| 83.53 | 1196.21 |
| 83.54 | 1161.54 |
| 83.55 | 1092.19 |

|       |         |
|-------|---------|
| 83.56 | 1092.19 |
| 83.57 | 1109.53 |
| 83.58 | 1473.59 |
| 83.59 | 1248.22 |
| 83.6  | 1473.59 |
| 83.61 | 1733.64 |
| 83.62 | 1473.59 |
| 83.63 | 1594.95 |
| 83.64 | 1889.66 |
| 83.65 | 1802.98 |
| 83.66 | 1889.66 |
| 83.67 | 1872.33 |
| 83.68 | 1993.68 |
| 83.69 | 2201.72 |
| 83.7  | 2375.08 |
| 83.71 | 2340.41 |
| 83.72 | 2704.47 |
| 83.73 | 3293.91 |
| 83.74 | 3779.33 |
| 83.75 | 3553.96 |
| 83.76 | 3900.68 |
| 83.77 | 5114.23 |
| 83.78 | 4732.83 |
| 83.79 | 5218.25 |
| 83.8  | 5183.57 |
| 83.81 | 5894.37 |
| 83.82 | 5773.01 |
| 83.83 | 6345.11 |
| 83.84 | 6275.77 |
| 83.85 | 6379.78 |
| 83.86 | 6189.08 |
| 83.87 | 6553.15 |
| 83.88 | 5460.96 |
| 83.89 | 5096.89 |
| 83.9  | 4611.47 |
| 83.91 | 4126.06 |
| 83.92 | 4438.11 |
| 83.93 | 3970.03 |
| 83.94 | 3831.34 |
| 83.95 | 3848.67 |
| 83.96 | 3085.87 |
| 83.97 | 3432.6  |
| 83.98 | 3085.87 |
| 83.99 | 3224.56 |



|       |         |
|-------|---------|
| 84    | 3779.33 |
| 84.01 | 3536.62 |
| 84.02 | 3345.92 |
| 84.03 | 3623.3  |
| 84.04 | 3345.92 |
| 84.05 | 3779.33 |
| 84.06 | 3883.35 |
| 84.07 | 3640.64 |
| 84.08 | 3883.35 |
| 84.09 | 3848.67 |
| 84.1  | 3172.56 |
| 84.11 | 3553.96 |
| 84.12 | 4056.71 |
| 84.13 | 3796.67 |
| 84.14 | 3137.88 |
| 84.15 | 3155.22 |
| 84.16 | 3172.56 |
| 84.17 | 2739.15 |
| 84.18 | 2461.76 |
| 84.19 | 2409.76 |
| 84.2  | 1924.34 |
| 84.21 | 2011.02 |
| 84.22 | 1802.98 |
| 84.23 | 2219.06 |
| 84.24 | 2167.05 |
| 84.25 | 1941.67 |
| 84.26 | 1785.65 |
| 84.27 | 1525.6  |
| 84.28 | 1490.93 |
| 84.29 | 1456.26 |
| 84.3  | 1421.58 |
| 84.31 | 1490.93 |
| 84.32 | 1248.22 |
| 84.33 | 1265.56 |
| 84.34 | 1109.53 |
| 84.35 | 1161.54 |
| 84.36 | 1092.19 |
| 84.37 | 1300.23 |
| 84.38 | 1092.19 |
| 84.39 | 1300.23 |
| 84.4  | 1144.2  |
| 84.41 | 1126.86 |
| 84.42 | 1005.51 |
| 84.43 | 1178.87 |

|       |         |
|-------|---------|
| 84.44 | 1300.23 |
| 84.45 | 1022.85 |
| 84.46 | 1022.85 |
| 84.47 | 1265.56 |
| 84.48 | 1144.2  |
| 84.49 | 1057.52 |
| 84.5  | 1005.51 |
| 84.51 | 1334.9  |
| 84.52 | 1005.51 |
| 84.53 | 953.5   |
| 84.54 | 1178.87 |
| 84.55 | 1057.52 |
| 84.56 | 953.5   |
| 84.57 | 1178.87 |
| 84.58 | 849.482 |
| 84.59 | 1040.18 |
| 84.6  | 1040.18 |
| 84.61 | 970.837 |
| 84.62 | 866.819 |
| 84.63 | 918.828 |
| 84.64 | 1022.85 |
| 84.65 | 1144.2  |
| 84.66 | 1178.87 |
| 84.67 | 1248.22 |
| 84.68 | 1248.22 |
| 84.69 | 1178.87 |
| 84.7  | 1282.89 |
| 84.71 | 1733.64 |
| 84.72 | 1681.63 |
| 84.73 | 1577.61 |
| 84.74 | 1594.95 |
| 84.75 | 1733.64 |
| 84.76 | 1872.33 |
| 84.77 | 2201.72 |
| 84.78 | 2305.74 |
| 84.79 | 2184.38 |
| 84.8  | 2600.46 |
| 84.81 | 2635.13 |
| 84.82 | 2617.79 |
| 84.83 | 3016.53 |
| 84.84 | 3241.9  |
| 84.85 | 3345.92 |
| 84.86 | 3727.32 |
| 84.87 | 3120.55 |

|       |         |
|-------|---------|
| 84.88 | 3363.26 |
| 84.89 | 2877.84 |
| 84.9  | 2825.83 |
| 84.91 | 3016.53 |
| 84.92 | 2739.15 |
| 84.93 | 2877.84 |
| 84.94 | 2652.46 |
| 84.95 | 2479.1  |
| 84.96 | 2236.39 |
| 84.97 | 2045.69 |
| 84.98 | 2063.03 |
| 84.99 | 1959.01 |
| 85    | 1837.66 |
| 85.01 | 1993.68 |
| 85.02 | 1976.35 |
| 85.03 | 1820.32 |
| 85.04 | 2236.39 |
| 85.05 | 1646.96 |
| 85.06 | 2097.7  |
| 85.07 | 2167.05 |
| 85.08 | 2011.02 |
| 85.09 | 2028.36 |
| 85.1  | 2305.74 |
| 85.11 | 2340.41 |
| 85.12 | 2184.38 |
| 85.13 | 2375.08 |
| 85.14 | 2271.06 |
| 85.15 | 2115.04 |
| 85.16 | 1907    |
| 85.17 | 1802.98 |
| 85.18 | 1785.65 |
| 85.19 | 1820.32 |
| 85.2  | 1560.27 |
| 85.21 | 1542.94 |
| 85.22 | 1508.26 |
| 85.23 | 1473.59 |
| 85.24 | 1265.56 |
| 85.25 | 1334.9  |
| 85.26 | 1126.86 |
| 85.27 | 1126.86 |
| 85.28 | 1057.52 |
| 85.29 | 1196.21 |
| 85.3  | 1126.86 |
| 85.31 | 1005.51 |

85.32 866.819  
85.33 1040.18  
85.34 988.173  
85.35 1022.85  
85.36 953.5  
85.37 970.837  
85.38 901.491  
85.39 606.773  
85.4 884.155  
85.41 832.146  
85.42 1005.51  
85.43 849.482  
85.44 918.828  
85.45 849.482  
85.46 624.109  
85.47 866.819  
85.48 988.173  
85.49 832.146  
85.5 780.137  
85.51 641.446  
85.52 918.828  
85.53 814.809  
85.54 918.828  
85.55 953.5  
85.56 658.782  
85.57 884.155  
85.58 988.173  
85.59 780.137  
85.6 762.8  
85.61 884.155  
85.62 693.455  
85.63 832.146  
85.64 762.8  
85.65 849.482  
85.66 797.473  
85.67 658.782  
85.68 797.473  
85.69 814.809  
85.7 728.128  
85.71 901.491  
85.72 901.491  
85.73 918.828  
85.74 814.809  
85.75 728.128

|       |         |
|-------|---------|
| 85.76 | 745.464 |
| 85.77 | 658.782 |
| 85.78 | 832.146 |
| 85.79 | 658.782 |
| 85.8  | 884.155 |
| 85.81 | 814.809 |
| 85.82 | 1005.51 |
| 85.83 | 728.128 |
| 85.84 | 693.455 |
| 85.85 | 866.819 |
| 85.86 | 918.828 |
| 85.87 | 988.173 |
| 85.88 | 780.137 |
| 85.89 | 884.155 |
| 85.9  | 676.118 |
| 85.91 | 658.782 |
| 85.92 | 797.473 |
| 85.93 | 745.464 |
| 85.94 | 918.828 |
| 85.95 | 866.819 |
| 85.96 | 693.455 |
| 85.97 | 658.782 |
| 85.98 | 780.137 |
| 85.99 | 676.118 |
| 86    | 762.8   |
| 86.01 | 745.464 |
| 86.02 | 884.155 |
| 86.03 | 745.464 |
| 86.04 | 849.482 |
| 86.05 | 884.155 |
| 86.06 | 728.128 |
| 86.07 | 849.482 |
| 86.08 | 745.464 |
| 86.09 | 745.464 |
| 86.1  | 832.146 |
| 86.11 | 710.791 |
| 86.12 | 641.446 |
| 86.13 | 762.8   |
| 86.14 | 797.473 |
| 86.15 | 710.791 |
| 86.16 | 641.446 |
| 86.17 | 1144.2  |
| 86.18 | 936.164 |
| 86.19 | 710.791 |

|       |         |
|-------|---------|
| 86.2  | 884.155 |
| 86.21 | 953.5   |
| 86.22 | 849.482 |
| 86.23 | 918.828 |
| 86.24 | 849.482 |
| 86.25 | 849.482 |
| 86.26 | 762.8   |
| 86.27 | 814.809 |
| 86.28 | 953.5   |
| 86.29 | 953.5   |
| 86.3  | 884.155 |
| 86.31 | 901.491 |
| 86.32 | 797.473 |
| 86.33 | 953.5   |
| 86.34 | 953.5   |
| 86.35 | 970.837 |
| 86.36 | 1126.86 |
| 86.37 | 849.482 |
| 86.38 | 1092.19 |
| 86.39 | 1109.53 |
| 86.4  | 988.173 |
| 86.41 | 1022.85 |
| 86.42 | 1282.89 |
| 86.43 | 1074.85 |
| 86.44 | 1126.86 |
| 86.45 | 1213.55 |
| 86.46 | 1109.53 |
| 86.47 | 1196.21 |
| 86.48 | 1230.88 |
| 86.49 | 1456.26 |
| 86.5  | 1352.24 |
| 86.51 | 1456.26 |
| 86.52 | 1352.24 |
| 86.53 | 1040.18 |
| 86.54 | 1248.22 |
| 86.55 | 1196.21 |
| 86.56 | 1109.53 |
| 86.57 | 970.837 |
| 86.58 | 1230.88 |
| 86.59 | 970.837 |
| 86.6  | 1230.88 |
| 86.61 | 1334.9  |
| 86.62 | 1161.54 |
| 86.63 | 884.155 |

|       |         |
|-------|---------|
| 86.64 | 1040.18 |
| 86.65 | 936.164 |
| 86.66 | 1022.85 |
| 86.67 | 1022.85 |
| 86.68 | 1022.85 |
| 86.69 | 1005.51 |
| 86.7  | 814.809 |
| 86.71 | 1092.19 |
| 86.72 | 988.173 |
| 86.73 | 1230.88 |
| 86.74 | 1074.85 |
| 86.75 | 1040.18 |
| 86.76 | 1144.2  |
| 86.77 | 1178.87 |
| 86.78 | 849.482 |
| 86.79 | 1144.2  |
| 86.8  | 1144.2  |
| 86.81 | 970.837 |
| 86.82 | 1057.52 |
| 86.83 | 1109.53 |
| 86.84 | 1126.86 |
| 86.85 | 1022.85 |
| 86.86 | 1040.18 |
| 86.87 | 970.837 |
| 86.88 | 1040.18 |
| 86.89 | 797.473 |
| 86.9  | 866.819 |
| 86.91 | 988.173 |
| 86.92 | 918.828 |
| 86.93 | 832.146 |
| 86.94 | 970.837 |
| 86.95 | 832.146 |
| 86.96 | 710.791 |
| 86.97 | 1005.51 |
| 86.98 | 884.155 |
| 86.99 | 780.137 |
| 87    | 780.137 |
| 87.01 | 866.819 |
| 87.02 | 693.455 |
| 87.03 | 693.455 |
| 87.04 | 918.828 |
| 87.05 | 762.8   |
| 87.06 | 676.118 |
| 87.07 | 728.128 |

|       |         |
|-------|---------|
| 87.08 | 780.137 |
| 87.09 | 953.5   |
| 87.1  | 762.8   |
| 87.11 | 710.791 |
| 87.12 | 710.791 |
| 87.13 | 554.764 |
| 87.14 | 624.109 |
| 87.15 | 710.791 |
| 87.16 | 762.8   |
| 87.17 | 849.482 |
| 87.18 | 832.146 |
| 87.19 | 693.455 |
| 87.2  | 710.791 |
| 87.21 | 728.128 |
| 87.22 | 814.809 |
| 87.23 | 693.455 |
| 87.24 | 589.437 |
| 87.25 | 797.473 |
| 87.26 | 728.128 |
| 87.27 | 797.473 |
| 87.28 | 728.128 |
| 87.29 | 658.782 |
| 87.3  | 676.118 |
| 87.31 | 728.128 |
| 87.32 | 728.128 |
| 87.33 | 832.146 |
| 87.34 | 693.455 |
| 87.35 | 572.1   |
| 87.36 | 658.782 |
| 87.37 | 901.491 |
| 87.38 | 641.446 |
| 87.39 | 572.1   |
| 87.4  | 797.473 |
| 87.41 | 814.809 |
| 87.42 | 814.809 |
| 87.43 | 797.473 |
| 87.44 | 762.8   |
| 87.45 | 693.455 |
| 87.46 | 745.464 |
| 87.47 | 693.455 |
| 87.48 | 745.464 |
| 87.49 | 658.782 |
| 87.5  | 884.155 |
| 87.51 | 884.155 |



87.52 676.118  
87.53 658.782  
87.54 728.128  
87.55 676.118  
87.56 797.473  
87.57 849.482  
87.58 658.782  
87.59 884.155  
87.6 762.8  
87.61 693.455  
87.62 624.109  
87.63 832.146  
87.64 780.137  
87.65 710.791  
87.66 693.455  
87.67 745.464  
87.68 606.773  
87.69 849.482  
87.7 589.437  
87.71 884.155  
87.72 953.5  
87.73 814.809  
87.74 728.128  
87.75 572.1  
87.76 658.782  
87.77 641.446  
87.78 554.764  
87.79 658.782  
87.8 520.091  
87.81 589.437  
87.82 780.137  
87.83 780.137  
87.84 884.155  
87.85 780.137  
87.86 780.137  
87.87 745.464  
87.88 624.109  
87.89 849.482  
87.9 762.8  
87.91 797.473  
87.92 780.137  
87.93 797.473  
87.94 797.473  
87.95 832.146

|       |         |
|-------|---------|
| 87.96 | 832.146 |
| 87.97 | 658.782 |
| 87.98 | 624.109 |
| 87.99 | 693.455 |
| 88    | 589.437 |
| 88.01 | 693.455 |
| 88.02 | 884.155 |
| 88.03 | 832.146 |
| 88.04 | 762.8   |
| 88.05 | 520.091 |
| 88.06 | 502.755 |
| 88.07 | 849.482 |
| 88.08 | 832.146 |
| 88.09 | 849.482 |
| 88.1  | 728.128 |
| 88.11 | 866.819 |
| 88.12 | 780.137 |
| 88.13 | 554.764 |
| 88.14 | 554.764 |
| 88.15 | 554.764 |
| 88.16 | 970.837 |
| 88.17 | 866.819 |
| 88.18 | 797.473 |
| 88.19 | 745.464 |
| 88.2  | 624.109 |
| 88.21 | 641.446 |
| 88.22 | 797.473 |
| 88.23 | 901.491 |
| 88.24 | 884.155 |
| 88.25 | 814.809 |
| 88.26 | 728.128 |
| 88.27 | 884.155 |
| 88.28 | 520.091 |
| 88.29 | 433.409 |
| 88.3  | 745.464 |
| 88.31 | 606.773 |
| 88.32 | 641.446 |
| 88.33 | 554.764 |
| 88.34 | 762.8   |
| 88.35 | 728.128 |
| 88.36 | 970.837 |
| 88.37 | 762.8   |
| 88.38 | 849.482 |
| 88.39 | 849.482 |

|       |         |
|-------|---------|
| 88.4  | 728.128 |
| 88.41 | 762.8   |
| 88.42 | 624.109 |
| 88.43 | 745.464 |
| 88.44 | 745.464 |
| 88.45 | 814.809 |
| 88.46 | 624.109 |
| 88.47 | 676.118 |
| 88.48 | 780.137 |
| 88.49 | 676.118 |
| 88.5  | 797.473 |
| 88.51 | 502.755 |
| 88.52 | 762.8   |
| 88.53 | 468.082 |
| 88.54 | 554.764 |
| 88.55 | 624.109 |
| 88.56 | 693.455 |
| 88.57 | 606.773 |
| 88.58 | 745.464 |
| 88.59 | 762.8   |
| 88.6  | 866.819 |
| 88.61 | 658.782 |
| 88.62 | 710.791 |
| 88.63 | 780.137 |
| 88.64 | 520.091 |
| 88.65 | 624.109 |
| 88.66 | 832.146 |
| 88.67 | 728.128 |
| 88.68 | 676.118 |
| 88.69 | 641.446 |
| 88.7  | 676.118 |
| 88.71 | 641.446 |
| 88.72 | 641.446 |
| 88.73 | 572.1   |
| 88.74 | 710.791 |
| 88.75 | 797.473 |
| 88.76 | 676.118 |
| 88.77 | 953.5   |
| 88.78 | 676.118 |
| 88.79 | 589.437 |
| 88.8  | 676.118 |
| 88.81 | 797.473 |
| 88.82 | 936.164 |
| 88.83 | 780.137 |

|       |         |
|-------|---------|
| 88.84 | 728.128 |
| 88.85 | 762.8   |
| 88.86 | 693.455 |
| 88.87 | 832.146 |
| 88.88 | 728.128 |
| 88.89 | 537.427 |
| 88.9  | 710.791 |
| 88.91 | 710.791 |
| 88.92 | 658.782 |
| 88.93 | 606.773 |
| 88.94 | 658.782 |
| 88.95 | 606.773 |
| 88.96 | 641.446 |
| 88.97 | 762.8   |
| 88.98 | 641.446 |
| 88.99 | 658.782 |
| 89    | 710.791 |
| 89.01 | 797.473 |
| 89.02 | 676.118 |
| 89.03 | 693.455 |
| 89.04 | 849.482 |
| 89.05 | 641.446 |
| 89.06 | 537.427 |
| 89.07 | 780.137 |
| 89.08 | 797.473 |
| 89.09 | 693.455 |
| 89.1  | 658.782 |
| 89.11 | 866.819 |
| 89.12 | 710.791 |
| 89.13 | 589.437 |
| 89.14 | 641.446 |
| 89.15 | 762.8   |
| 89.16 | 589.437 |
| 89.17 | 641.446 |
| 89.18 | 814.809 |
| 89.19 | 693.455 |
| 89.2  | 641.446 |
| 89.21 | 641.446 |
| 89.22 | 693.455 |
| 89.23 | 589.437 |
| 89.24 | 658.782 |
| 89.25 | 624.109 |
| 89.26 | 762.8   |
| 89.27 | 710.791 |

|       |         |
|-------|---------|
| 89.28 | 762.8   |
| 89.29 | 710.791 |
| 89.3  | 728.128 |
| 89.31 | 658.782 |
| 89.32 | 884.155 |
| 89.33 | 745.464 |
| 89.34 | 589.437 |
| 89.35 | 676.118 |
| 89.36 | 849.482 |
| 89.37 | 676.118 |
| 89.38 | 641.446 |
| 89.39 | 797.473 |
| 89.4  | 728.128 |
| 89.41 | 693.455 |
| 89.42 | 814.809 |
| 89.43 | 832.146 |
| 89.44 | 728.128 |
| 89.45 | 641.446 |
| 89.46 | 797.473 |
| 89.47 | 762.8   |
| 89.48 | 953.5   |
| 89.49 | 762.8   |
| 89.5  | 468.082 |
| 89.51 | 624.109 |
| 89.52 | 589.437 |
| 89.53 | 641.446 |
| 89.54 | 849.482 |
| 89.55 | 658.782 |
| 89.56 | 710.791 |
| 89.57 | 832.146 |
| 89.58 | 658.782 |
| 89.59 | 658.782 |
| 89.6  | 728.128 |
| 89.61 | 745.464 |
| 89.62 | 554.764 |
| 89.63 | 762.8   |
| 89.64 | 762.8   |
| 89.65 | 780.137 |
| 89.66 | 676.118 |
| 89.67 | 918.828 |
| 89.68 | 814.809 |
| 89.69 | 762.8   |
| 89.7  | 658.782 |
| 89.71 | 676.118 |

|       |         |
|-------|---------|
| 89.72 | 658.782 |
| 89.73 | 728.128 |
| 89.74 | 814.809 |
| 89.75 | 693.455 |
| 89.76 | 624.109 |
| 89.77 | 745.464 |
| 89.78 | 693.455 |
| 89.79 | 728.128 |
| 89.8  | 485.418 |
| 89.81 | 537.427 |
| 89.82 | 676.118 |
| 89.83 | 832.146 |
| 89.84 | 762.8   |
| 89.85 | 849.482 |
| 89.86 | 728.128 |
| 89.87 | 745.464 |
| 89.88 | 884.155 |
| 89.89 | 641.446 |
| 89.9  | 762.8   |
| 89.91 | 866.819 |
| 89.92 | 814.809 |
| 89.93 | 797.473 |
| 89.94 | 797.473 |
| 89.95 | 606.773 |
| 89.96 | 762.8   |
| 89.97 | 676.118 |
| 89.98 | 693.455 |
| 89.99 | 693.455 |
| 90    | 710.791 |

|         |      |         |
|---------|------|---------|
| xrd60kg | 5    | 6189.08 |
|         | 5.01 | 5443.62 |
|         | 5.02 | 5374.27 |
|         | 5.03 | 5547.64 |
|         | 5.04 | 6067.73 |
|         | 5.05 | 5790.35 |
|         | 5.06 | 5668.99 |
|         | 5.07 | 5356.94 |
|         | 5.08 | 5807.68 |
|         | 5.09 | 5339.6  |
|         | 5.1  | 5460.96 |
|         | 5.11 | 5374.27 |
|         | 5.12 | 5027.55 |
|         | 5.13 | 5356.94 |

5.14 5599.65  
5.15 5963.71  
5.16 5842.36  
5.17 5252.92  
5.18 5304.93  
5.19 5270.26  
5.2 5929.04  
5.21 5755.67  
5.22 5859.69  
5.23 5859.69  
5.24 5963.71  
5.25 5686.33  
5.26 5547.64  
5.27 6154.41  
5.28 5755.67  
5.29 4802.17  
5.3 5946.38  
5.31 5963.71  
5.32 5391.61  
5.33 5790.35  
5.34 5582.31  
5.35 5443.62  
5.36 5929.04  
5.37 5495.63  
5.38 5651.66  
5.39 6119.74  
5.4 5790.35  
5.41 5963.71  
5.42 6154.41  
5.43 6067.73  
5.44 5946.38  
5.45 6431.79  
5.46 6275.77  
5.47 5946.38  
5.48 5374.27  
5.49 5582.31  
5.5 5911.7  
5.51 5894.37  
5.52 5616.98  
5.53 5564.98  
5.54 5564.98  
5.55 6674.5  
5.56 5842.36  
5.57 6466.47

5.58 5512.97  
5.59 6189.08  
5.6 6102.4  
5.61 5842.36  
5.62 6241.09  
5.63 5443.62  
5.64 5998.38  
5.65 5911.7  
5.66 5842.36  
5.67 6154.41  
5.68 6189.08  
5.69 5963.71  
5.7 6033.06  
5.71 5946.38  
5.72 5651.66  
5.73 6154.41  
5.74 6397.12  
5.75 5998.38  
5.76 5825.02  
5.77 5721  
5.78 6362.45  
5.79 5877.03  
5.8 6379.78  
5.81 6241.09  
5.82 5963.71  
5.83 6223.76  
5.84 6327.78  
5.85 6067.73  
5.86 6449.13  
5.87 5998.38  
5.88 5634.32  
5.89 6431.79  
5.9 6137.08  
5.91 5582.31  
5.92 5842.36  
5.93 5738.34  
5.94 5859.69  
5.95 6102.4  
5.96 6639.83  
5.97 5946.38  
5.98 5703.67  
5.99 6033.06  
6 5911.7  
6.01 5859.69



6.02 5929.04  
6.03 6223.76  
6.04 5668.99  
6.05 5877.03  
6.06 6275.77  
6.07 6085.07  
6.08 5634.32  
6.09 6258.43  
6.1 6015.72  
6.11 5877.03  
6.12 5790.35  
6.13 5929.04  
6.14 5998.38  
6.15 6223.76  
6.16 5946.38  
6.17 6050.39  
6.18 5963.71  
6.19 6102.4  
6.2 6223.76  
6.21 5755.67  
6.22 5859.69  
6.23 6414.46  
6.24 6431.79  
6.25 6466.47  
6.26 6033.06  
6.27 6241.09  
6.28 6397.12  
6.29 5946.38  
6.3 6241.09  
6.31 6310.44  
6.32 5963.71  
6.33 5547.64  
6.34 5478.29  
6.35 6206.42  
6.36 6518.48  
6.37 6102.4  
6.38 6015.72  
6.39 6067.73  
6.4 5911.7  
6.41 5894.37  
6.42 6137.08  
6.43 6154.41  
6.44 5929.04  
6.45 5859.69

6.46 5842.36  
6.47 6431.79  
6.48 6691.84  
6.49 6258.43  
6.5 5963.71  
6.51 5859.69  
6.52 6015.72  
6.53 6241.09  
6.54 5599.65  
6.55 6813.19  
6.56 6327.78  
6.57 6171.75  
6.58 6414.46  
6.59 6085.07  
6.6 5894.37  
6.61 5842.36  
6.62 5790.35  
6.63 6293.1  
6.64 5998.38  
6.65 5842.36  
6.66 5703.67  
6.67 6189.08  
6.68 6085.07  
6.69 6431.79  
6.7 5981.05  
6.71 5877.03  
6.72 6189.08  
6.73 5721  
6.74 6414.46  
6.75 6379.78  
6.76 6241.09  
6.77 6466.47  
6.78 6813.19  
6.79 6050.39  
6.8 5877.03  
6.81 6119.74  
6.82 6362.45  
6.83 5877.03  
6.84 6085.07  
6.85 6189.08  
6.86 5738.34  
6.87 5877.03  
6.88 5825.02  
6.89 6102.4

|      |         |
|------|---------|
| 6.9  | 6085.07 |
| 6.91 | 6483.8  |
| 6.92 | 6362.45 |
| 6.93 | 6119.74 |
| 6.94 | 6154.41 |
| 6.95 | 5547.64 |
| 6.96 | 6015.72 |
| 6.97 | 6345.11 |
| 6.98 | 5929.04 |
| 6.99 | 6119.74 |
| 7    | 6189.08 |
| 7.01 | 6206.42 |
| 7.02 | 6206.42 |
| 7.03 | 5807.68 |
| 7.04 | 6466.47 |
| 7.05 | 5755.67 |
| 7.06 | 6587.82 |
| 7.07 | 5963.71 |
| 7.08 | 6553.15 |
| 7.09 | 6206.42 |
| 7.1  | 5564.98 |
| 7.11 | 6241.09 |
| 7.12 | 5911.7  |
| 7.13 | 5998.38 |
| 7.14 | 6657.17 |
| 7.15 | 5963.71 |
| 7.16 | 6189.08 |
| 7.17 | 5686.33 |
| 7.18 | 6379.78 |
| 7.19 | 6639.83 |
| 7.2  | 5634.32 |
| 7.21 | 5859.69 |
| 7.22 | 6085.07 |
| 7.23 | 6119.74 |
| 7.24 | 5929.04 |
| 7.25 | 5807.68 |
| 7.26 | 5790.35 |
| 7.27 | 5807.68 |
| 7.28 | 5790.35 |
| 7.29 | 6102.4  |
| 7.3  | 6015.72 |
| 7.31 | 6189.08 |
| 7.32 | 5773.01 |
| 7.33 | 6223.76 |

|      |         |
|------|---------|
| 7.34 | 5408.95 |
| 7.35 | 5686.33 |
| 7.36 | 6241.09 |
| 7.37 | 6033.06 |
| 7.38 | 5981.05 |
| 7.39 | 6483.8  |
| 7.4  | 5686.33 |
| 7.41 | 6015.72 |
| 7.42 | 6414.46 |
| 7.43 | 5998.38 |
| 7.44 | 6154.41 |
| 7.45 | 5547.64 |
| 7.46 | 5894.37 |
| 7.47 | 6033.06 |
| 7.48 | 6501.14 |
| 7.49 | 5911.7  |
| 7.5  | 6206.42 |
| 7.51 | 5825.02 |
| 7.52 | 5929.04 |
| 7.53 | 6206.42 |
| 7.54 | 5981.05 |
| 7.55 | 6466.47 |
| 7.56 | 5287.59 |
| 7.57 | 6449.13 |
| 7.58 | 6310.44 |
| 7.59 | 6154.41 |
| 7.6  | 5911.7  |
| 7.61 | 6241.09 |
| 7.62 | 5512.97 |
| 7.63 | 5512.97 |
| 7.64 | 5218.25 |
| 7.65 | 6015.72 |
| 7.66 | 6379.78 |
| 7.67 | 5981.05 |
| 7.68 | 6206.42 |
| 7.69 | 6189.08 |
| 7.7  | 6015.72 |
| 7.71 | 5842.36 |
| 7.72 | 5703.67 |
| 7.73 | 5651.66 |
| 7.74 | 5564.98 |
| 7.75 | 6033.06 |
| 7.76 | 5426.28 |
| 7.77 | 5946.38 |

|      |         |
|------|---------|
| 7.78 | 6223.76 |
| 7.79 | 6119.74 |
| 7.8  | 5807.68 |
| 7.81 | 5790.35 |
| 7.82 | 5599.65 |
| 7.83 | 5634.32 |
| 7.84 | 6171.75 |
| 7.85 | 5738.34 |
| 7.86 | 6154.41 |
| 7.87 | 5703.67 |
| 7.88 | 5877.03 |
| 7.89 | 5426.28 |
| 7.9  | 5790.35 |
| 7.91 | 5564.98 |
| 7.92 | 5582.31 |
| 7.93 | 6033.06 |
| 7.94 | 6275.77 |
| 7.95 | 5703.67 |
| 7.96 | 5408.95 |
| 7.97 | 5790.35 |
| 7.98 | 5616.98 |
| 7.99 | 5877.03 |
| 8    | 5842.36 |
| 8.01 | 5668.99 |
| 8.02 | 5755.67 |
| 8.03 | 6206.42 |
| 8.04 | 5981.05 |
| 8.05 | 5651.66 |
| 8.06 | 5512.97 |
| 8.07 | 5790.35 |
| 8.08 | 5946.38 |
| 8.09 | 5998.38 |
| 8.1  | 5547.64 |
| 8.11 | 5721    |
| 8.12 | 5738.34 |
| 8.13 | 5842.36 |
| 8.14 | 5998.38 |
| 8.15 | 5825.02 |
| 8.16 | 5564.98 |
| 8.17 | 5963.71 |
| 8.18 | 6223.76 |
| 8.19 | 5582.31 |
| 8.2  | 5478.29 |
| 8.21 | 6154.41 |

8.22 5686.33  
8.23 5859.69  
8.24 5668.99  
8.25 5356.94  
8.26 6137.08  
8.27 5721  
8.28 5755.67  
8.29 5755.67  
8.3 6535.81  
8.31 5668.99  
8.32 6171.75  
8.33 5426.28  
8.34 5408.95  
8.35 5877.03  
8.36 5963.71  
8.37 5374.27  
8.38 5391.61  
8.39 5790.35  
8.4 6154.41  
8.41 6015.72  
8.42 5773.01  
8.43 6033.06  
8.44 5911.7  
8.45 5304.93  
8.46 5773.01  
8.47 5859.69  
8.48 5807.68  
8.49 5755.67  
8.5 5582.31  
8.51 6015.72  
8.52 5634.32  
8.53 5894.37  
8.54 5929.04  
8.55 6154.41  
8.56 5582.31  
8.57 5634.32  
8.58 5547.64  
8.59 5686.33  
8.6 5547.64  
8.61 5478.29  
8.62 6102.4  
8.63 5981.05  
8.64 5374.27  
8.65 5807.68

8.66 5599.65  
8.67 5703.67  
8.68 5339.6  
8.69 5235.58  
8.7 5287.59  
8.71 5079.56  
8.72 5825.02  
8.73 5686.33  
8.74 5530.3  
8.75 5460.96  
8.76 5790.35  
8.77 5374.27  
8.78 5686.33  
8.79 5235.58  
8.8 6223.76  
8.81 5738.34  
8.82 5686.33  
8.83 5339.6  
8.84 5391.61  
8.85 5790.35  
8.86 5530.3  
8.87 5530.3  
8.88 5825.02  
8.89 6310.44  
8.9 5339.6  
8.91 5114.23  
8.92 5773.01  
8.93 5651.66  
8.94 5062.22  
8.95 5616.98  
8.96 5634.32  
8.97 5738.34  
8.98 5443.62  
8.99 5790.35  
9 5391.61  
9.01 5911.7  
9.02 5963.71  
9.03 5374.27  
9.04 5738.34  
9.05 5426.28  
9.06 5270.26  
9.07 5721  
9.08 5235.58  
9.09 5651.66

9.1 5616.98  
9.11 5634.32  
9.12 5443.62  
9.13 5062.22  
9.14 5668.99  
9.15 5495.63  
9.16 5773.01  
9.17 5478.29  
9.18 5911.7  
9.19 5807.68  
9.2 5564.98  
9.21 5668.99  
9.22 5703.67  
9.23 5252.92  
9.24 5460.96  
9.25 5062.22  
9.26 6015.72  
9.27 5339.6  
9.28 5998.38  
9.29 5512.97  
9.3 5010.21  
9.31 5807.68  
9.32 5356.94  
9.33 5200.91  
9.34 5651.66  
9.35 5010.21  
9.36 5183.57  
9.37 5426.28  
9.38 5027.55  
9.39 4975.54  
9.4 5460.96  
9.41 5616.98  
9.42 5235.58  
9.43 5183.57  
9.44 5114.23  
9.45 5339.6  
9.46 5547.64  
9.47 5512.97  
9.48 5391.61  
9.49 5062.22  
9.5 4871.52  
9.51 5478.29  
9.52 5270.26  
9.53 5183.57



9.54 5252.92  
9.55 5478.29  
9.56 5356.94  
9.57 5825.02  
9.58 5408.95  
9.59 4611.47  
9.6 5114.23  
9.61 5530.3  
9.62 5218.25  
9.63 5547.64  
9.64 4611.47  
9.65 5460.96  
9.66 5183.57  
9.67 5218.25  
9.68 4958.2  
9.69 4940.87  
9.7 5131.57  
9.71 5235.58  
9.72 5512.97  
9.73 5651.66  
9.74 5114.23  
9.75 5252.92  
9.76 5252.92  
9.77 5287.59  
9.78 5235.58  
9.79 5096.89  
9.8 5027.55  
9.81 5010.21  
9.82 5183.57  
9.83 5391.61  
9.84 4854.18  
9.85 5495.63  
9.86 5287.59  
9.87 5079.56  
9.88 4524.79  
9.89 5010.21  
9.9 5183.57  
9.91 5356.94  
9.92 4906.19  
9.93 5096.89  
9.94 5304.93  
9.95 4542.13  
9.96 4663.48  
9.97 4836.85

|       |         |
|-------|---------|
| 9.98  | 5062.22 |
| 9.99  | 5114.23 |
| 10    | 5235.58 |
| 10.01 | 4923.53 |
| 10.02 | 5356.94 |
| 10.03 | 5096.89 |
| 10.04 | 4992.87 |
| 10.05 | 5183.57 |
| 10.06 | 4715.49 |
| 10.07 | 4888.86 |
| 10.08 | 5010.21 |
| 10.09 | 4854.18 |
| 10.1  | 4975.54 |
| 10.11 | 4906.19 |
| 10.12 | 5200.91 |
| 10.13 | 4646.15 |
| 10.14 | 4871.52 |
| 10.15 | 5183.57 |
| 10.16 | 5148.9  |
| 10.17 | 5062.22 |
| 10.18 | 5166.24 |
| 10.19 | 5304.93 |
| 10.2  | 5096.89 |
| 10.21 | 5027.55 |
| 10.22 | 5235.58 |
| 10.23 | 5408.95 |
| 10.24 | 5252.92 |
| 10.25 | 5200.91 |
| 10.26 | 4559.47 |
| 10.27 | 5218.25 |
| 10.28 | 4888.86 |
| 10.29 | 5200.91 |
| 10.3  | 5114.23 |
| 10.31 | 5564.98 |
| 10.32 | 5166.24 |
| 10.33 | 4888.86 |
| 10.34 | 4576.8  |
| 10.35 | 4940.87 |
| 10.36 | 4871.52 |
| 10.37 | 5183.57 |
| 10.38 | 4524.79 |
| 10.39 | 4836.85 |
| 10.4  | 4750.17 |
| 10.41 | 4940.87 |

|       |         |
|-------|---------|
| 10.42 | 5252.92 |
| 10.43 | 4958.2  |
| 10.44 | 5200.91 |
| 10.45 | 4386.1  |
| 10.46 | 4802.17 |
| 10.47 | 4888.86 |
| 10.48 | 4975.54 |
| 10.49 | 4750.17 |
| 10.5  | 4698.16 |
| 10.51 | 4715.49 |
| 10.52 | 4351.43 |
| 10.53 | 4611.47 |
| 10.54 | 4524.79 |
| 10.55 | 4299.42 |
| 10.56 | 4767.5  |
| 10.57 | 4507.46 |
| 10.58 | 4750.17 |
| 10.59 | 4767.5  |
| 10.6  | 4646.15 |
| 10.61 | 5322.27 |
| 10.62 | 4628.81 |
| 10.63 | 4698.16 |
| 10.64 | 4472.78 |
| 10.65 | 4542.13 |
| 10.66 | 4802.17 |
| 10.67 | 4472.78 |
| 10.68 | 4542.13 |
| 10.69 | 4524.79 |
| 10.7  | 4750.17 |
| 10.71 | 4958.2  |
| 10.72 | 5235.58 |
| 10.73 | 4819.51 |
| 10.74 | 4750.17 |
| 10.75 | 4368.77 |
| 10.76 | 5044.88 |
| 10.77 | 4698.16 |
| 10.78 | 4490.12 |
| 10.79 | 4784.84 |
| 10.8  | 4975.54 |
| 10.81 | 4802.17 |
| 10.82 | 5096.89 |
| 10.83 | 4819.51 |
| 10.84 | 4178.07 |
| 10.85 | 4836.85 |

|       |         |
|-------|---------|
| 10.86 | 5148.9  |
| 10.87 | 4264.75 |
| 10.88 | 4767.5  |
| 10.89 | 4646.15 |
| 10.9  | 4420.77 |
| 10.91 | 3987.37 |
| 10.92 | 4576.8  |
| 10.93 | 4594.14 |
| 10.94 | 4871.52 |
| 10.95 | 4351.43 |
| 10.96 | 4490.12 |
| 10.97 | 4472.78 |
| 10.98 | 4264.75 |
| 10.99 | 4559.47 |
| 11    | 4334.09 |
| 11.01 | 4611.47 |
| 11.02 | 4940.87 |
| 11.03 | 4455.45 |
| 11.04 | 4472.78 |
| 11.05 | 4542.13 |
| 11.06 | 5062.22 |
| 11.07 | 4611.47 |
| 11.08 | 4628.81 |
| 11.09 | 4247.41 |
| 11.1  | 4438.11 |
| 11.11 | 5027.55 |
| 11.12 | 4056.71 |
| 11.13 | 4420.77 |
| 11.14 | 4750.17 |
| 11.15 | 4316.76 |
| 11.16 | 4490.12 |
| 11.17 | 4074.05 |
| 11.18 | 4247.41 |
| 11.19 | 4680.82 |
| 11.2  | 4802.17 |
| 11.21 | 3848.67 |
| 11.22 | 4091.38 |
| 11.23 | 4542.13 |
| 11.24 | 4628.81 |
| 11.25 | 4888.86 |
| 11.26 | 4559.47 |
| 11.27 | 4178.07 |
| 11.28 | 4212.74 |
| 11.29 | 4368.77 |

11.3 4802.17  
11.31 4628.81  
11.32 4732.83  
11.33 4524.79  
11.34 3970.03  
11.35 4143.39  
11.36 4264.75  
11.37 4178.07  
11.38 4212.74  
11.39 4784.84  
11.4 3970.03  
11.41 4247.41  
11.42 4039.37  
11.43 4646.15  
11.44 4420.77  
11.45 4906.19  
11.46 4420.77  
11.47 4143.39  
11.48 4386.1  
11.49 3831.34  
11.5 4334.09  
11.51 4022.04  
11.52 4576.8  
11.53 4316.76  
11.54 4542.13  
11.55 4212.74  
11.56 3814  
11.57 4559.47  
11.58 4178.07  
11.59 4628.81  
11.6 4490.12  
11.61 3640.64  
11.62 3970.03  
11.63 4334.09  
11.64 3970.03  
11.65 4282.08  
11.66 4316.76  
11.67 4282.08  
11.68 4594.14  
11.69 4368.77  
11.7 4334.09  
11.71 4178.07  
11.72 4403.44  
11.73 3952.69

|       |         |
|-------|---------|
| 11.74 | 4663.48 |
| 11.75 | 4039.37 |
| 11.76 | 4403.44 |
| 11.77 | 4264.75 |
| 11.78 | 3848.67 |
| 11.79 | 4542.13 |
| 11.8  | 4195.4  |
| 11.81 | 4368.77 |
| 11.82 | 4698.16 |
| 11.83 | 4316.76 |
| 11.84 | 4438.11 |
| 11.85 | 4091.38 |
| 11.86 | 4264.75 |
| 11.87 | 4160.73 |
| 11.88 | 4299.42 |
| 11.89 | 4074.05 |
| 11.9  | 4056.71 |
| 11.91 | 4507.46 |
| 11.92 | 4472.78 |
| 11.93 | 3900.68 |
| 11.94 | 3727.32 |
| 11.95 | 3866.01 |
| 11.96 | 3952.69 |
| 11.97 | 4247.41 |
| 11.98 | 3900.68 |
| 11.99 | 4178.07 |
| 12    | 3709.98 |
| 12.01 | 3709.98 |
| 12.02 | 4108.72 |
| 12.03 | 3831.34 |
| 12.04 | 4299.42 |
| 12.05 | 4230.07 |
| 12.06 | 4126.06 |
| 12.07 | 3883.35 |
| 12.08 | 3779.33 |
| 12.09 | 4472.78 |
| 12.1  | 4247.41 |
| 12.11 | 4420.77 |
| 12.12 | 4143.39 |
| 12.13 | 3935.36 |
| 12.14 | 4074.05 |
| 12.15 | 4472.78 |
| 12.16 | 4784.84 |
| 12.17 | 4299.42 |

|       |         |
|-------|---------|
| 12.18 | 4143.39 |
| 12.19 | 4056.71 |
| 12.2  | 3970.03 |
| 12.21 | 4195.4  |
| 12.22 | 4351.43 |
| 12.23 | 3727.32 |
| 12.24 | 3779.33 |
| 12.25 | 4126.06 |
| 12.26 | 3883.35 |
| 12.27 | 3744.66 |
| 12.28 | 4056.71 |
| 12.29 | 4264.75 |
| 12.3  | 3519.28 |
| 12.31 | 3970.03 |
| 12.32 | 3935.36 |
| 12.33 | 4056.71 |
| 12.34 | 3952.69 |
| 12.35 | 4264.75 |
| 12.36 | 4559.47 |
| 12.37 | 3796.67 |
| 12.38 | 3571.29 |
| 12.39 | 4195.4  |
| 12.4  | 4195.4  |
| 12.41 | 4230.07 |
| 12.42 | 3761.99 |
| 12.43 | 3831.34 |
| 12.44 | 4143.39 |
| 12.45 | 4091.38 |
| 12.46 | 3675.31 |
| 12.47 | 3952.69 |
| 12.48 | 3848.67 |
| 12.49 | 4039.37 |
| 12.5  | 3657.97 |
| 12.51 | 4316.76 |
| 12.52 | 4022.04 |
| 12.53 | 3640.64 |
| 12.54 | 3519.28 |
| 12.55 | 3744.66 |
| 12.56 | 4195.4  |
| 12.57 | 3744.66 |
| 12.58 | 4386.1  |
| 12.59 | 4472.78 |
| 12.6  | 3866.01 |
| 12.61 | 4056.71 |

|       |         |
|-------|---------|
| 12.62 | 3935.36 |
| 12.63 | 4091.38 |
| 12.64 | 3952.69 |
| 12.65 | 3796.67 |
| 12.66 | 3987.37 |
| 12.67 | 3883.35 |
| 12.68 | 3675.31 |
| 12.69 | 3935.36 |
| 12.7  | 4091.38 |
| 12.71 | 4455.45 |
| 12.72 | 4212.74 |
| 12.73 | 3935.36 |
| 12.74 | 4316.76 |
| 12.75 | 4039.37 |
| 12.76 | 3814    |
| 12.77 | 4022.04 |
| 12.78 | 3779.33 |
| 12.79 | 4282.08 |
| 12.8  | 3952.69 |
| 12.81 | 3831.34 |
| 12.82 | 4091.38 |
| 12.83 | 3918.02 |
| 12.84 | 3449.94 |
| 12.85 | 4178.07 |
| 12.86 | 3952.69 |
| 12.87 | 3952.69 |
| 12.88 | 3831.34 |
| 12.89 | 3467.27 |
| 12.9  | 4022.04 |
| 12.91 | 4126.06 |
| 12.92 | 4039.37 |
| 12.93 | 3779.33 |
| 12.94 | 3970.03 |
| 12.95 | 3657.97 |
| 12.96 | 3831.34 |
| 12.97 | 3640.64 |
| 12.98 | 3588.63 |
| 12.99 | 3657.97 |
| 13    | 4126.06 |
| 13.01 | 4039.37 |
| 13.02 | 3987.37 |
| 13.03 | 4056.71 |
| 13.04 | 3449.94 |
| 13.05 | 3484.61 |



|       |         |
|-------|---------|
| 13.06 | 3779.33 |
| 13.07 | 4091.38 |
| 13.08 | 3918.02 |
| 13.09 | 3571.29 |
| 13.1  | 3761.99 |
| 13.11 | 3605.97 |
| 13.12 | 3709.98 |
| 13.13 | 3796.67 |
| 13.14 | 3484.61 |
| 13.15 | 3588.63 |
| 13.16 | 4108.72 |
| 13.17 | 3744.66 |
| 13.18 | 3761.99 |
| 13.19 | 3883.35 |
| 13.2  | 3761.99 |
| 13.21 | 3900.68 |
| 13.22 | 3675.31 |
| 13.23 | 3605.97 |
| 13.24 | 3449.94 |
| 13.25 | 3657.97 |
| 13.26 | 3866.01 |
| 13.27 | 3623.3  |
| 13.28 | 3588.63 |
| 13.29 | 3467.27 |
| 13.3  | 3623.3  |
| 13.31 | 3900.68 |
| 13.32 | 3657.97 |
| 13.33 | 3709.98 |
| 13.34 | 3709.98 |
| 13.35 | 4074.05 |
| 13.36 | 3553.96 |
| 13.37 | 3467.27 |
| 13.38 | 3883.35 |
| 13.39 | 3761.99 |
| 13.4  | 3709.98 |
| 13.41 | 4022.04 |
| 13.42 | 3553.96 |
| 13.43 | 3328.58 |
| 13.44 | 3970.03 |
| 13.45 | 3970.03 |
| 13.46 | 3588.63 |
| 13.47 | 3657.97 |
| 13.48 | 3449.94 |
| 13.49 | 3883.35 |

|       |         |
|-------|---------|
| 13.5  | 3900.68 |
| 13.51 | 3467.27 |
| 13.52 | 3328.58 |
| 13.53 | 3761.99 |
| 13.54 | 3952.69 |
| 13.55 | 3657.97 |
| 13.56 | 3536.62 |
| 13.57 | 3380.59 |
| 13.58 | 3432.6  |
| 13.59 | 3467.27 |
| 13.6  | 3952.69 |
| 13.61 | 3588.63 |
| 13.62 | 3501.95 |
| 13.63 | 3553.96 |
| 13.64 | 3536.62 |
| 13.65 | 3814    |
| 13.66 | 3623.3  |
| 13.67 | 3501.95 |
| 13.68 | 3467.27 |
| 13.69 | 3432.6  |
| 13.7  | 3675.31 |
| 13.71 | 3918.02 |
| 13.72 | 3692.65 |
| 13.73 | 3692.65 |
| 13.74 | 3761.99 |
| 13.75 | 2964.52 |
| 13.76 | 3640.64 |
| 13.77 | 3501.95 |
| 13.78 | 3397.93 |
| 13.79 | 3467.27 |
| 13.8  | 3536.62 |
| 13.81 | 3761.99 |
| 13.82 | 3814    |
| 13.83 | 3553.96 |
| 13.84 | 3397.93 |
| 13.85 | 3675.31 |
| 13.86 | 3779.33 |
| 13.87 | 3588.63 |
| 13.88 | 3605.97 |
| 13.89 | 3588.63 |
| 13.9  | 3831.34 |
| 13.91 | 3640.64 |
| 13.92 | 3311.25 |
| 13.93 | 3987.37 |

|       |         |
|-------|---------|
| 13.94 | 3657.97 |
| 13.95 | 3866.01 |
| 13.96 | 3623.3  |
| 13.97 | 3363.26 |
| 13.98 | 3657.97 |
| 13.99 | 4091.38 |
| 14    | 4022.04 |
| 14.01 | 3363.26 |
| 14.02 | 3571.29 |
| 14.03 | 3484.61 |
| 14.04 | 3761.99 |
| 14.05 | 3952.69 |
| 14.06 | 3068.54 |
| 14.07 | 3276.57 |
| 14.08 | 3120.55 |
| 14.09 | 3848.67 |
| 14.1  | 3657.97 |
| 14.11 | 3814    |
| 14.12 | 3519.28 |
| 14.13 | 3831.34 |
| 14.14 | 3779.33 |
| 14.15 | 3415.26 |
| 14.16 | 3675.31 |
| 14.17 | 3484.61 |
| 14.18 | 3761.99 |
| 14.19 | 3536.62 |
| 14.2  | 3415.26 |
| 14.21 | 3120.55 |
| 14.22 | 3709.98 |
| 14.23 | 3224.56 |
| 14.24 | 3311.25 |
| 14.25 | 3432.6  |
| 14.26 | 3519.28 |
| 14.27 | 3553.96 |
| 14.28 | 3814    |
| 14.29 | 4091.38 |
| 14.3  | 3103.21 |
| 14.31 | 3727.32 |
| 14.32 | 3241.9  |
| 14.33 | 3328.58 |
| 14.34 | 2912.51 |
| 14.35 | 3051.2  |
| 14.36 | 3241.9  |
| 14.37 | 3397.93 |

|       |         |
|-------|---------|
| 14.38 | 3415.26 |
| 14.39 | 3449.94 |
| 14.4  | 3293.91 |
| 14.41 | 3623.3  |
| 14.42 | 3519.28 |
| 14.43 | 3397.93 |
| 14.44 | 3536.62 |
| 14.45 | 3380.59 |
| 14.46 | 3519.28 |
| 14.47 | 3779.33 |
| 14.48 | 3761.99 |
| 14.49 | 3345.92 |
| 14.5  | 3623.3  |
| 14.51 | 3675.31 |
| 14.52 | 3623.3  |
| 14.53 | 3623.3  |
| 14.54 | 3536.62 |
| 14.55 | 3588.63 |
| 14.56 | 3605.97 |
| 14.57 | 3675.31 |
| 14.58 | 3345.92 |
| 14.59 | 3571.29 |
| 14.6  | 3397.93 |
| 14.61 | 3259.24 |
| 14.62 | 3380.59 |
| 14.63 | 3952.69 |
| 14.64 | 3883.35 |
| 14.65 | 3571.29 |
| 14.66 | 3761.99 |
| 14.67 | 3449.94 |
| 14.68 | 3311.25 |
| 14.69 | 3120.55 |
| 14.7  | 2895.17 |
| 14.71 | 3137.88 |
| 14.72 | 3484.61 |
| 14.73 | 3675.31 |
| 14.74 | 3085.87 |
| 14.75 | 3657.97 |
| 14.76 | 3207.23 |
| 14.77 | 3415.26 |
| 14.78 | 3276.57 |
| 14.79 | 3692.65 |
| 14.8  | 3172.56 |
| 14.81 | 3432.6  |

|       |         |
|-------|---------|
| 14.82 | 3241.9  |
| 14.83 | 3068.54 |
| 14.84 | 3449.94 |
| 14.85 | 3415.26 |
| 14.86 | 3241.9  |
| 14.87 | 3415.26 |
| 14.88 | 3293.91 |
| 14.89 | 3432.6  |
| 14.9  | 3311.25 |
| 14.91 | 3172.56 |
| 14.92 | 3657.97 |
| 14.93 | 3380.59 |
| 14.94 | 3137.88 |
| 14.95 | 3345.92 |
| 14.96 | 3657.97 |
| 14.97 | 3345.92 |
| 14.98 | 3068.54 |
| 14.99 | 3224.56 |
| 15    | 3467.27 |
| 15.01 | 3189.89 |
| 15.02 | 3363.26 |
| 15.03 | 3137.88 |
| 15.04 | 2999.19 |
| 15.05 | 3051.2  |
| 15.06 | 3103.21 |
| 15.07 | 3605.97 |
| 15.08 | 3657.97 |
| 15.09 | 3033.86 |
| 15.1  | 2999.19 |
| 15.11 | 3380.59 |
| 15.12 | 3484.61 |
| 15.13 | 3103.21 |
| 15.14 | 3120.55 |
| 15.15 | 3207.23 |
| 15.16 | 3397.93 |
| 15.17 | 3363.26 |
| 15.18 | 3449.94 |
| 15.19 | 3276.57 |
| 15.2  | 3328.58 |
| 15.21 | 3415.26 |
| 15.22 | 3484.61 |
| 15.23 | 3224.56 |
| 15.24 | 3241.9  |
| 15.25 | 3207.23 |

|       |         |
|-------|---------|
| 15.26 | 3259.24 |
| 15.27 | 3553.96 |
| 15.28 | 3085.87 |
| 15.29 | 2461.76 |
| 15.3  | 2895.17 |
| 15.31 | 3103.21 |
| 15.32 | 3189.89 |
| 15.33 | 3207.23 |
| 15.34 | 3120.55 |
| 15.35 | 2964.52 |
| 15.36 | 3259.24 |
| 15.37 | 3189.89 |
| 15.38 | 3380.59 |
| 15.39 | 2929.85 |
| 15.4  | 3380.59 |
| 15.41 | 3137.88 |
| 15.42 | 3085.87 |
| 15.43 | 3484.61 |
| 15.44 | 3120.55 |
| 15.45 | 3016.53 |
| 15.46 | 3033.86 |
| 15.47 | 3224.56 |
| 15.48 | 3172.56 |
| 15.49 | 3120.55 |
| 15.5  | 3241.9  |
| 15.51 | 3172.56 |
| 15.52 | 3207.23 |
| 15.53 | 3189.89 |
| 15.54 | 3311.25 |
| 15.55 | 3293.91 |
| 15.56 | 2877.84 |
| 15.57 | 3137.88 |
| 15.58 | 3432.6  |
| 15.59 | 3137.88 |
| 15.6  | 3415.26 |
| 15.61 | 3293.91 |
| 15.62 | 3467.27 |
| 15.63 | 3259.24 |
| 15.64 | 3068.54 |
| 15.65 | 3051.2  |
| 15.66 | 2947.18 |
| 15.67 | 3536.62 |
| 15.68 | 3207.23 |
| 15.69 | 3363.26 |

|       |         |
|-------|---------|
| 15.7  | 3155.22 |
| 15.71 | 3241.9  |
| 15.72 | 3363.26 |
| 15.73 | 3120.55 |
| 15.74 | 2635.13 |
| 15.75 | 3293.91 |
| 15.76 | 3380.59 |
| 15.77 | 3397.93 |
| 15.78 | 3068.54 |
| 15.79 | 3068.54 |
| 15.8  | 3605.97 |
| 15.81 | 3085.87 |
| 15.82 | 2999.19 |
| 15.83 | 3155.22 |
| 15.84 | 2964.52 |
| 15.85 | 3033.86 |
| 15.86 | 2999.19 |
| 15.87 | 3311.25 |
| 15.88 | 3328.58 |
| 15.89 | 2808.49 |
| 15.9  | 3172.56 |
| 15.91 | 3051.2  |
| 15.92 | 2947.18 |
| 15.93 | 2721.81 |
| 15.94 | 3033.86 |
| 15.95 | 3189.89 |
| 15.96 | 2981.86 |
| 15.97 | 3276.57 |
| 15.98 | 3051.2  |
| 15.99 | 3120.55 |
| 16    | 2999.19 |
| 16.01 | 2947.18 |
| 16.02 | 2947.18 |
| 16.03 | 3259.24 |
| 16.04 | 2895.17 |
| 16.05 | 3085.87 |
| 16.06 | 3207.23 |
| 16.07 | 3207.23 |
| 16.08 | 3328.58 |
| 16.09 | 2929.85 |
| 16.1  | 3189.89 |
| 16.11 | 3033.86 |
| 16.12 | 2756.48 |
| 16.13 | 3432.6  |

|       |         |
|-------|---------|
| 16.14 | 3467.27 |
| 16.15 | 3155.22 |
| 16.16 | 3155.22 |
| 16.17 | 2895.17 |
| 16.18 | 3033.86 |
| 16.19 | 2877.84 |
| 16.2  | 3155.22 |
| 16.21 | 3016.53 |
| 16.22 | 3519.28 |
| 16.23 | 3380.59 |
| 16.24 | 2548.45 |
| 16.25 | 3155.22 |
| 16.26 | 3103.21 |
| 16.27 | 2704.47 |
| 16.28 | 3172.56 |
| 16.29 | 2929.85 |
| 16.3  | 3051.2  |
| 16.31 | 2964.52 |
| 16.32 | 2721.81 |
| 16.33 | 3207.23 |
| 16.34 | 2877.84 |
| 16.35 | 3172.56 |
| 16.36 | 3155.22 |
| 16.37 | 2999.19 |
| 16.38 | 3155.22 |
| 16.39 | 3363.26 |
| 16.4  | 3137.88 |
| 16.41 | 3241.9  |
| 16.42 | 3623.3  |
| 16.43 | 2808.49 |
| 16.44 | 2964.52 |
| 16.45 | 3033.86 |
| 16.46 | 3085.87 |
| 16.47 | 3016.53 |
| 16.48 | 3259.24 |
| 16.49 | 2929.85 |
| 16.5  | 3207.23 |
| 16.51 | 3103.21 |
| 16.52 | 2947.18 |
| 16.53 | 3189.89 |
| 16.54 | 2947.18 |
| 16.55 | 3207.23 |
| 16.56 | 3172.56 |
| 16.57 | 2825.83 |



|       |         |
|-------|---------|
| 16.58 | 3276.57 |
| 16.59 | 3137.88 |
| 16.6  | 3276.57 |
| 16.61 | 3068.54 |
| 16.62 | 3016.53 |
| 16.63 | 3172.56 |
| 16.64 | 2999.19 |
| 16.65 | 2964.52 |
| 16.66 | 3085.87 |
| 16.67 | 2877.84 |
| 16.68 | 2669.8  |
| 16.69 | 3207.23 |
| 16.7  | 3380.59 |
| 16.71 | 2981.86 |
| 16.72 | 2600.46 |
| 16.73 | 2929.85 |
| 16.74 | 2721.81 |
| 16.75 | 3172.56 |
| 16.76 | 3155.22 |
| 16.77 | 2929.85 |
| 16.78 | 3276.57 |
| 16.79 | 3137.88 |
| 16.8  | 2981.86 |
| 16.81 | 3068.54 |
| 16.82 | 2791.16 |
| 16.83 | 3068.54 |
| 16.84 | 2981.86 |
| 16.85 | 3380.59 |
| 16.86 | 3172.56 |
| 16.87 | 3224.56 |
| 16.88 | 2929.85 |
| 16.89 | 3033.86 |
| 16.9  | 2981.86 |
| 16.91 | 2929.85 |
| 16.92 | 2756.48 |
| 16.93 | 2756.48 |
| 16.94 | 3276.57 |
| 16.95 | 3172.56 |
| 16.96 | 2808.49 |
| 16.97 | 2912.51 |
| 16.98 | 3120.55 |
| 16.99 | 3155.22 |
| 17    | 2947.18 |
| 17.01 | 2964.52 |

|       |         |
|-------|---------|
| 17.02 | 3345.92 |
| 17.03 | 2617.79 |
| 17.04 | 2739.15 |
| 17.05 | 2895.17 |
| 17.06 | 3207.23 |
| 17.07 | 3536.62 |
| 17.08 | 3137.88 |
| 17.09 | 3519.28 |
| 17.1  | 3432.6  |
| 17.11 | 3068.54 |
| 17.12 | 3189.89 |
| 17.13 | 3293.91 |
| 17.14 | 3051.2  |
| 17.15 | 3016.53 |
| 17.16 | 3259.24 |
| 17.17 | 2947.18 |
| 17.18 | 2687.14 |
| 17.19 | 3189.89 |
| 17.2  | 3276.57 |
| 17.21 | 2791.16 |
| 17.22 | 2877.84 |
| 17.23 | 2773.82 |
| 17.24 | 2860.5  |
| 17.25 | 2895.17 |
| 17.26 | 2739.15 |
| 17.27 | 3259.24 |
| 17.28 | 3016.53 |
| 17.29 | 2791.16 |
| 17.3  | 2947.18 |
| 17.31 | 3085.87 |
| 17.32 | 3033.86 |
| 17.33 | 3016.53 |
| 17.34 | 2617.79 |
| 17.35 | 3068.54 |
| 17.36 | 3311.25 |
| 17.37 | 2860.5  |
| 17.38 | 2877.84 |
| 17.39 | 2929.85 |
| 17.4  | 2947.18 |
| 17.41 | 2721.81 |
| 17.42 | 2895.17 |
| 17.43 | 3016.53 |
| 17.44 | 2739.15 |
| 17.45 | 3155.22 |

|       |         |
|-------|---------|
| 17.46 | 2964.52 |
| 17.47 | 2860.5  |
| 17.48 | 3085.87 |
| 17.49 | 3189.89 |
| 17.5  | 3016.53 |
| 17.51 | 2565.78 |
| 17.52 | 2929.85 |
| 17.53 | 2513.77 |
| 17.54 | 2912.51 |
| 17.55 | 3467.27 |
| 17.56 | 3103.21 |
| 17.57 | 3033.86 |
| 17.58 | 3016.53 |
| 17.59 | 2999.19 |
| 17.6  | 2773.82 |
| 17.61 | 2513.77 |
| 17.62 | 2496.44 |
| 17.63 | 2964.52 |
| 17.64 | 3155.22 |
| 17.65 | 2721.81 |
| 17.66 | 2877.84 |
| 17.67 | 2721.81 |
| 17.68 | 3241.9  |
| 17.69 | 3085.87 |
| 17.7  | 2600.46 |
| 17.71 | 2860.5  |
| 17.72 | 2947.18 |
| 17.73 | 3120.55 |
| 17.74 | 2877.84 |
| 17.75 | 3068.54 |
| 17.76 | 3016.53 |
| 17.77 | 3276.57 |
| 17.78 | 2877.84 |
| 17.79 | 2912.51 |
| 17.8  | 3311.25 |
| 17.81 | 2999.19 |
| 17.82 | 3345.92 |
| 17.83 | 3259.24 |
| 17.84 | 2947.18 |
| 17.85 | 2704.47 |
| 17.86 | 2895.17 |
| 17.87 | 3068.54 |
| 17.88 | 3172.56 |
| 17.89 | 2531.11 |

|       |         |
|-------|---------|
| 17.9  | 2496.44 |
| 17.91 | 2947.18 |
| 17.92 | 3068.54 |
| 17.93 | 3051.2  |
| 17.94 | 2964.52 |
| 17.95 | 3155.22 |
| 17.96 | 2600.46 |
| 17.97 | 2860.5  |
| 17.98 | 2600.46 |
| 17.99 | 2791.16 |
| 18    | 2721.81 |
| 18.01 | 3068.54 |
| 18.02 | 2704.47 |
| 18.03 | 2912.51 |
| 18.04 | 2721.81 |
| 18.05 | 2912.51 |
| 18.06 | 2669.8  |
| 18.07 | 2340.41 |
| 18.08 | 3103.21 |
| 18.09 | 3068.54 |
| 18.1  | 2791.16 |
| 18.11 | 2929.85 |
| 18.12 | 2860.5  |
| 18.13 | 2583.12 |
| 18.14 | 3103.21 |
| 18.15 | 2687.14 |
| 18.16 | 2964.52 |
| 18.17 | 2791.16 |
| 18.18 | 2600.46 |
| 18.19 | 2617.79 |
| 18.2  | 2600.46 |
| 18.21 | 2947.18 |
| 18.22 | 2669.8  |
| 18.23 | 2999.19 |
| 18.24 | 2912.51 |
| 18.25 | 2895.17 |
| 18.26 | 3120.55 |
| 18.27 | 3345.92 |
| 18.28 | 2756.48 |
| 18.29 | 3033.86 |
| 18.3  | 2912.51 |
| 18.31 | 2964.52 |
| 18.32 | 3033.86 |
| 18.33 | 3068.54 |

|       |         |
|-------|---------|
| 18.34 | 2652.46 |
| 18.35 | 2825.83 |
| 18.36 | 2721.81 |
| 18.37 | 2773.82 |
| 18.38 | 2825.83 |
| 18.39 | 2704.47 |
| 18.4  | 2791.16 |
| 18.41 | 2773.82 |
| 18.42 | 2808.49 |
| 18.43 | 2461.76 |
| 18.44 | 2843.16 |
| 18.45 | 2756.48 |
| 18.46 | 3155.22 |
| 18.47 | 2981.86 |
| 18.48 | 2947.18 |
| 18.49 | 2791.16 |
| 18.5  | 2392.42 |
| 18.51 | 2825.83 |
| 18.52 | 2652.46 |
| 18.53 | 2877.84 |
| 18.54 | 2496.44 |
| 18.55 | 2669.8  |
| 18.56 | 2964.52 |
| 18.57 | 3016.53 |
| 18.58 | 2825.83 |
| 18.59 | 2860.5  |
| 18.6  | 2999.19 |
| 18.61 | 2791.16 |
| 18.62 | 3120.55 |
| 18.63 | 2912.51 |
| 18.64 | 2808.49 |
| 18.65 | 2617.79 |
| 18.66 | 3241.9  |
| 18.67 | 3224.56 |
| 18.68 | 2877.84 |
| 18.69 | 2947.18 |
| 18.7  | 2496.44 |
| 18.71 | 2947.18 |
| 18.72 | 2825.83 |
| 18.73 | 2600.46 |
| 18.74 | 2531.11 |
| 18.75 | 3120.55 |
| 18.76 | 3103.21 |
| 18.77 | 2600.46 |

|       |         |
|-------|---------|
| 18.78 | 2617.79 |
| 18.79 | 3016.53 |
| 18.8  | 2999.19 |
| 18.81 | 2860.5  |
| 18.82 | 2600.46 |
| 18.83 | 2999.19 |
| 18.84 | 3155.22 |
| 18.85 | 2721.81 |
| 18.86 | 2635.13 |
| 18.87 | 2877.84 |
| 18.88 | 2739.15 |
| 18.89 | 2860.5  |
| 18.9  | 2791.16 |
| 18.91 | 2947.18 |
| 18.92 | 2912.51 |
| 18.93 | 2877.84 |
| 18.94 | 3033.86 |
| 18.95 | 2895.17 |
| 18.96 | 2929.85 |
| 18.97 | 2964.52 |
| 18.98 | 2877.84 |
| 18.99 | 2825.83 |
| 19    | 2947.18 |
| 19.01 | 2964.52 |
| 19.02 | 2947.18 |
| 19.03 | 3172.56 |
| 19.04 | 3224.56 |
| 19.05 | 2912.51 |
| 19.06 | 2669.8  |
| 19.07 | 3380.59 |
| 19.08 | 3397.93 |
| 19.09 | 3068.54 |
| 19.1  | 2981.86 |
| 19.11 | 2912.51 |
| 19.12 | 3137.88 |
| 19.13 | 3085.87 |
| 19.14 | 2687.14 |
| 19.15 | 2739.15 |
| 19.16 | 2808.49 |
| 19.17 | 2843.16 |
| 19.18 | 2981.86 |
| 19.19 | 2791.16 |
| 19.2  | 3051.2  |
| 19.21 | 2860.5  |

|       |         |
|-------|---------|
| 19.22 | 2773.82 |
| 19.23 | 2843.16 |
| 19.24 | 2895.17 |
| 19.25 | 2929.85 |
| 19.26 | 3293.91 |
| 19.27 | 2964.52 |
| 19.28 | 2860.5  |
| 19.29 | 2652.46 |
| 19.3  | 2808.49 |
| 19.31 | 3016.53 |
| 19.32 | 3085.87 |
| 19.33 | 2253.73 |
| 19.34 | 2721.81 |
| 19.35 | 3259.24 |
| 19.36 | 2912.51 |
| 19.37 | 2808.49 |
| 19.38 | 2895.17 |
| 19.39 | 2860.5  |
| 19.4  | 2929.85 |
| 19.41 | 2947.18 |
| 19.42 | 3016.53 |
| 19.43 | 2669.8  |
| 19.44 | 3311.25 |
| 19.45 | 3207.23 |
| 19.46 | 2947.18 |
| 19.47 | 3016.53 |
| 19.48 | 3068.54 |
| 19.49 | 2791.16 |
| 19.5  | 3155.22 |
| 19.51 | 3068.54 |
| 19.52 | 2929.85 |
| 19.53 | 2860.5  |
| 19.54 | 2739.15 |
| 19.55 | 2877.84 |
| 19.56 | 2999.19 |
| 19.57 | 2825.83 |
| 19.58 | 2756.48 |
| 19.59 | 2929.85 |
| 19.6  | 2929.85 |
| 19.61 | 2756.48 |
| 19.62 | 2981.86 |
| 19.63 | 3033.86 |
| 19.64 | 3068.54 |
| 19.65 | 2704.47 |

|       |         |
|-------|---------|
| 19.66 | 2756.48 |
| 19.67 | 2981.86 |
| 19.68 | 3120.55 |
| 19.69 | 2739.15 |
| 19.7  | 3103.21 |
| 19.71 | 3172.56 |
| 19.72 | 2895.17 |
| 19.73 | 2947.18 |
| 19.74 | 3172.56 |
| 19.75 | 2756.48 |
| 19.76 | 2877.84 |
| 19.77 | 2912.51 |
| 19.78 | 3189.89 |
| 19.79 | 2860.5  |
| 19.8  | 2929.85 |
| 19.81 | 2617.79 |
| 19.82 | 2704.47 |
| 19.83 | 3328.58 |
| 19.84 | 2947.18 |
| 19.85 | 3241.9  |
| 19.86 | 2929.85 |
| 19.87 | 3103.21 |
| 19.88 | 2635.13 |
| 19.89 | 2929.85 |
| 19.9  | 2756.48 |
| 19.91 | 2600.46 |
| 19.92 | 3033.86 |
| 19.93 | 3241.9  |
| 19.94 | 3103.21 |
| 19.95 | 2652.46 |
| 19.96 | 2687.14 |
| 19.97 | 2808.49 |
| 19.98 | 2739.15 |
| 19.99 | 3311.25 |
| 20    | 2791.16 |
| 20.01 | 2912.51 |
| 20.02 | 2964.52 |
| 20.03 | 3241.9  |
| 20.04 | 2773.82 |
| 20.05 | 2548.45 |
| 20.06 | 3224.56 |
| 20.07 | 3259.24 |
| 20.08 | 2947.18 |
| 20.09 | 2531.11 |



|       |         |
|-------|---------|
| 20.1  | 3103.21 |
| 20.11 | 3224.56 |
| 20.12 | 2947.18 |
| 20.13 | 3224.56 |
| 20.14 | 3224.56 |
| 20.15 | 2860.5  |
| 20.16 | 2843.16 |
| 20.17 | 3345.92 |
| 20.18 | 3103.21 |
| 20.19 | 3276.57 |
| 20.2  | 3189.89 |
| 20.21 | 2947.18 |
| 20.22 | 3328.58 |
| 20.23 | 3259.24 |
| 20.24 | 3259.24 |
| 20.25 | 3137.88 |
| 20.26 | 3016.53 |
| 20.27 | 3085.87 |
| 20.28 | 3155.22 |
| 20.29 | 3363.26 |
| 20.3  | 3657.97 |
| 20.31 | 3328.58 |
| 20.32 | 3224.56 |
| 20.33 | 3553.96 |
| 20.34 | 3449.94 |
| 20.35 | 4004.7  |
| 20.36 | 4126.06 |
| 20.37 | 3970.03 |
| 20.38 | 3761.99 |
| 20.39 | 3675.31 |
| 20.4  | 3276.57 |
| 20.41 | 3848.67 |
| 20.42 | 3744.66 |
| 20.43 | 3519.28 |
| 20.44 | 4022.04 |
| 20.45 | 3449.94 |
| 20.46 | 3536.62 |
| 20.47 | 3172.56 |
| 20.48 | 3293.91 |
| 20.49 | 3501.95 |
| 20.5  | 3623.3  |
| 20.51 | 3068.54 |
| 20.52 | 3241.9  |
| 20.53 | 3449.94 |

|       |         |
|-------|---------|
| 20.54 | 3068.54 |
| 20.55 | 3189.89 |
| 20.56 | 3397.93 |
| 20.57 | 2773.82 |
| 20.58 | 3224.56 |
| 20.59 | 2721.81 |
| 20.6  | 3085.87 |
| 20.61 | 3103.21 |
| 20.62 | 3016.53 |
| 20.63 | 2808.49 |
| 20.64 | 3033.86 |
| 20.65 | 2791.16 |
| 20.66 | 3103.21 |
| 20.67 | 3467.27 |
| 20.68 | 3259.24 |
| 20.69 | 2860.5  |
| 20.7  | 2860.5  |
| 20.71 | 2860.5  |
| 20.72 | 3085.87 |
| 20.73 | 2981.86 |
| 20.74 | 2704.47 |
| 20.75 | 3016.53 |
| 20.76 | 2981.86 |
| 20.77 | 2843.16 |
| 20.78 | 2964.52 |
| 20.79 | 3224.56 |
| 20.8  | 2912.51 |
| 20.81 | 2756.48 |
| 20.82 | 3137.88 |
| 20.83 | 3380.59 |
| 20.84 | 3293.91 |
| 20.85 | 2565.78 |
| 20.86 | 3120.55 |
| 20.87 | 3103.21 |
| 20.88 | 3033.86 |
| 20.89 | 3103.21 |
| 20.9  | 2964.52 |
| 20.91 | 3155.22 |
| 20.92 | 3172.56 |
| 20.93 | 2877.84 |
| 20.94 | 3103.21 |
| 20.95 | 3467.27 |
| 20.96 | 3068.54 |
| 20.97 | 3241.9  |

|       |         |
|-------|---------|
| 20.98 | 3207.23 |
| 20.99 | 3207.23 |
| 21    | 3276.57 |
| 21.01 | 2964.52 |
| 21.02 | 3103.21 |
| 21.03 | 2877.84 |
| 21.04 | 2825.83 |
| 21.05 | 3328.58 |
| 21.06 | 2895.17 |
| 21.07 | 3328.58 |
| 21.08 | 2877.84 |
| 21.09 | 2773.82 |
| 21.1  | 2877.84 |
| 21.11 | 2531.11 |
| 21.12 | 3016.53 |
| 21.13 | 2981.86 |
| 21.14 | 3085.87 |
| 21.15 | 2964.52 |
| 21.16 | 3276.57 |
| 21.17 | 3120.55 |
| 21.18 | 3051.2  |
| 21.19 | 3207.23 |
| 21.2  | 3328.58 |
| 21.21 | 3276.57 |
| 21.22 | 2964.52 |
| 21.23 | 2981.86 |
| 21.24 | 3120.55 |
| 21.25 | 2929.85 |
| 21.26 | 2999.19 |
| 21.27 | 3103.21 |
| 21.28 | 3415.26 |
| 21.29 | 3345.92 |
| 21.3  | 3207.23 |
| 21.31 | 3224.56 |
| 21.32 | 2461.76 |
| 21.33 | 2860.5  |
| 21.34 | 3172.56 |
| 21.35 | 2981.86 |
| 21.36 | 3189.89 |
| 21.37 | 2912.51 |
| 21.38 | 3259.24 |
| 21.39 | 2895.17 |
| 21.4  | 2981.86 |
| 21.41 | 3241.9  |

|       |         |
|-------|---------|
| 21.42 | 2895.17 |
| 21.43 | 3085.87 |
| 21.44 | 2912.51 |
| 21.45 | 3016.53 |
| 21.46 | 3241.9  |
| 21.47 | 2895.17 |
| 21.48 | 2999.19 |
| 21.49 | 3276.57 |
| 21.5  | 2825.83 |
| 21.51 | 2739.15 |
| 21.52 | 3224.56 |
| 21.53 | 3293.91 |
| 21.54 | 3085.87 |
| 21.55 | 3623.3  |
| 21.56 | 3103.21 |
| 21.57 | 3068.54 |
| 21.58 | 3103.21 |
| 21.59 | 3016.53 |
| 21.6  | 3085.87 |
| 21.61 | 3051.2  |
| 21.62 | 3068.54 |
| 21.63 | 3155.22 |
| 21.64 | 2860.5  |
| 21.65 | 3172.56 |
| 21.66 | 3432.6  |
| 21.67 | 3397.93 |
| 21.68 | 3016.53 |
| 21.69 | 3276.57 |
| 21.7  | 2877.84 |
| 21.71 | 2843.16 |
| 21.72 | 2912.51 |
| 21.73 | 2929.85 |
| 21.74 | 3241.9  |
| 21.75 | 2808.49 |
| 21.76 | 2999.19 |
| 21.77 | 3397.93 |
| 21.78 | 2947.18 |
| 21.79 | 3380.59 |
| 21.8  | 2825.83 |
| 21.81 | 2877.84 |
| 21.82 | 2981.86 |
| 21.83 | 2773.82 |
| 21.84 | 2947.18 |
| 21.85 | 2981.86 |

|       |         |
|-------|---------|
| 21.86 | 3068.54 |
| 21.87 | 3189.89 |
| 21.88 | 3328.58 |
| 21.89 | 3172.56 |
| 21.9  | 2929.85 |
| 21.91 | 3103.21 |
| 21.92 | 2964.52 |
| 21.93 | 3259.24 |
| 21.94 | 3172.56 |
| 21.95 | 3103.21 |
| 21.96 | 3224.56 |
| 21.97 | 3172.56 |
| 21.98 | 3189.89 |
| 21.99 | 2981.86 |
| 22    | 3224.56 |
| 22.01 | 3137.88 |
| 22.02 | 3363.26 |
| 22.03 | 3276.57 |
| 22.04 | 3241.9  |
| 22.05 | 3345.92 |
| 22.06 | 3172.56 |
| 22.07 | 3120.55 |
| 22.08 | 3103.21 |
| 22.09 | 2947.18 |
| 22.1  | 3172.56 |
| 22.11 | 3172.56 |
| 22.12 | 3259.24 |
| 22.13 | 3519.28 |
| 22.14 | 3293.91 |
| 22.15 | 3189.89 |
| 22.16 | 3224.56 |
| 22.17 | 3224.56 |
| 22.18 | 3172.56 |
| 22.19 | 2860.5  |
| 22.2  | 3051.2  |
| 22.21 | 3657.97 |
| 22.22 | 3085.87 |
| 22.23 | 3172.56 |
| 22.24 | 2912.51 |
| 22.25 | 3172.56 |
| 22.26 | 3605.97 |
| 22.27 | 3363.26 |
| 22.28 | 3467.27 |
| 22.29 | 3207.23 |

|       |         |
|-------|---------|
| 22.3  | 3085.87 |
| 22.31 | 3137.88 |
| 22.32 | 3085.87 |
| 22.33 | 3085.87 |
| 22.34 | 3068.54 |
| 22.35 | 2860.5  |
| 22.36 | 3189.89 |
| 22.37 | 3588.63 |
| 22.38 | 3137.88 |
| 22.39 | 3103.21 |
| 22.4  | 3155.22 |
| 22.41 | 2860.5  |
| 22.42 | 3033.86 |
| 22.43 | 3519.28 |
| 22.44 | 3432.6  |
| 22.45 | 3692.65 |
| 22.46 | 3363.26 |
| 22.47 | 3172.56 |
| 22.48 | 3137.88 |
| 22.49 | 3051.2  |
| 22.5  | 3623.3  |
| 22.51 | 3761.99 |
| 22.52 | 3120.55 |
| 22.53 | 2999.19 |
| 22.54 | 3207.23 |
| 22.55 | 3311.25 |
| 22.56 | 3397.93 |
| 22.57 | 3016.53 |
| 22.58 | 3103.21 |
| 22.59 | 3363.26 |
| 22.6  | 3016.53 |
| 22.61 | 3467.27 |
| 22.62 | 3761.99 |
| 22.63 | 3553.96 |
| 22.64 | 3328.58 |
| 22.65 | 3259.24 |
| 22.66 | 3553.96 |
| 22.67 | 3189.89 |
| 22.68 | 3519.28 |
| 22.69 | 3848.67 |
| 22.7  | 3796.67 |
| 22.71 | 3831.34 |
| 22.72 | 3415.26 |
| 22.73 | 3571.29 |

|       |         |
|-------|---------|
| 22.74 | 3692.65 |
| 22.75 | 3207.23 |
| 22.76 | 2999.19 |
| 22.77 | 3120.55 |
| 22.78 | 3675.31 |
| 22.79 | 3727.32 |
| 22.8  | 3467.27 |
| 22.81 | 3692.65 |
| 22.82 | 3605.97 |
| 22.83 | 3571.29 |
| 22.84 | 3328.58 |
| 22.85 | 3484.61 |
| 22.86 | 3623.3  |
| 22.87 | 4247.41 |
| 22.88 | 3363.26 |
| 22.89 | 3467.27 |
| 22.9  | 3866.01 |
| 22.91 | 4368.77 |
| 22.92 | 3952.69 |
| 22.93 | 4351.43 |
| 22.94 | 4160.73 |
| 22.95 | 4039.37 |
| 22.96 | 4524.79 |
| 22.97 | 4715.49 |
| 22.98 | 4559.47 |
| 22.99 | 4611.47 |
| 23    | 4611.47 |
| 23.01 | 4542.13 |
| 23.02 | 4802.17 |
| 23.03 | 5426.28 |
| 23.04 | 5235.58 |
| 23.05 | 5859.69 |
| 23.06 | 6085.07 |
| 23.07 | 6223.76 |
| 23.08 | 6362.45 |
| 23.09 | 6813.19 |
| 23.1  | 7125.25 |
| 23.11 | 7333.28 |
| 23.12 | 7333.28 |
| 23.13 | 7974.73 |
| 23.14 | 8772.2  |
| 23.15 | 9188.28 |
| 23.16 | 9014.91 |
| 23.17 | 10211.1 |

|       |         |
|-------|---------|
| 23.18 | 10800.6 |
| 23.19 | 10869.9 |
| 23.2  | 10939.3 |
| 23.21 | 10661.9 |
| 23.22 | 11234   |
| 23.23 | 10835.2 |
| 23.24 | 10471.2 |
| 23.25 | 10176.4 |
| 23.26 | 9101.59 |
| 23.27 | 9153.6  |
| 23.28 | 8269.45 |
| 23.29 | 8581.5  |
| 23.3  | 7506.65 |
| 23.31 | 6362.45 |
| 23.32 | 6241.09 |
| 23.33 | 6449.13 |
| 23.34 | 6379.78 |
| 23.35 | 5547.64 |
| 23.36 | 5825.02 |
| 23.37 | 5218.25 |
| 23.38 | 4940.87 |
| 23.39 | 5114.23 |
| 23.4  | 4888.86 |
| 23.41 | 4836.85 |
| 23.42 | 4646.15 |
| 23.43 | 4264.75 |
| 23.44 | 4316.76 |
| 23.45 | 4056.71 |
| 23.46 | 4074.05 |
| 23.47 | 3796.67 |
| 23.48 | 3970.03 |
| 23.49 | 3623.3  |
| 23.5  | 3727.32 |
| 23.51 | 3657.97 |
| 23.52 | 3831.34 |
| 23.53 | 3848.67 |
| 23.54 | 3987.37 |
| 23.55 | 3709.98 |
| 23.56 | 3397.93 |
| 23.57 | 3311.25 |
| 23.58 | 3709.98 |
| 23.59 | 3657.97 |
| 23.6  | 3293.91 |
| 23.61 | 2999.19 |



|       |         |
|-------|---------|
| 23.62 | 3467.27 |
| 23.63 | 3224.56 |
| 23.64 | 3709.98 |
| 23.65 | 3744.66 |
| 23.66 | 3727.32 |
| 23.67 | 3553.96 |
| 23.68 | 3501.95 |
| 23.69 | 3363.26 |
| 23.7  | 3588.63 |
| 23.71 | 3449.94 |
| 23.72 | 3328.58 |
| 23.73 | 3293.91 |
| 23.74 | 3623.3  |
| 23.75 | 3761.99 |
| 23.76 | 3259.24 |
| 23.77 | 3709.98 |
| 23.78 | 3761.99 |
| 23.79 | 3744.66 |
| 23.8  | 4091.38 |
| 23.81 | 3189.89 |
| 23.82 | 3675.31 |
| 23.83 | 3397.93 |
| 23.84 | 3189.89 |
| 23.85 | 3449.94 |
| 23.86 | 3068.54 |
| 23.87 | 3397.93 |
| 23.88 | 3172.56 |
| 23.89 | 3397.93 |
| 23.9  | 3796.67 |
| 23.91 | 3501.95 |
| 23.92 | 3137.88 |
| 23.93 | 3397.93 |
| 23.94 | 3709.98 |
| 23.95 | 3380.59 |
| 23.96 | 3432.6  |
| 23.97 | 3727.32 |
| 23.98 | 3345.92 |
| 23.99 | 3103.21 |
| 24    | 3536.62 |
| 24.01 | 3536.62 |
| 24.02 | 3415.26 |
| 24.03 | 3675.31 |
| 24.04 | 3311.25 |
| 24.05 | 2947.18 |

|       |         |
|-------|---------|
| 24.06 | 2825.83 |
| 24.07 | 3605.97 |
| 24.08 | 3519.28 |
| 24.09 | 3814    |
| 24.1  | 3380.59 |
| 24.11 | 3727.32 |
| 24.12 | 3172.56 |
| 24.13 | 3501.95 |
| 24.14 | 3397.93 |
| 24.15 | 3345.92 |
| 24.16 | 3709.98 |
| 24.17 | 3484.61 |
| 24.18 | 3571.29 |
| 24.19 | 2808.49 |
| 24.2  | 3345.92 |
| 24.21 | 3796.67 |
| 24.22 | 3623.3  |
| 24.23 | 3137.88 |
| 24.24 | 3588.63 |
| 24.25 | 3779.33 |
| 24.26 | 3588.63 |
| 24.27 | 3449.94 |
| 24.28 | 3155.22 |
| 24.29 | 3484.61 |
| 24.3  | 3085.87 |
| 24.31 | 3241.9  |
| 24.32 | 3623.3  |
| 24.33 | 3900.68 |
| 24.34 | 3293.91 |
| 24.35 | 3484.61 |
| 24.36 | 3172.56 |
| 24.37 | 3293.91 |
| 24.38 | 3536.62 |
| 24.39 | 3207.23 |
| 24.4  | 3467.27 |
| 24.41 | 3571.29 |
| 24.42 | 3501.95 |
| 24.43 | 3623.3  |
| 24.44 | 3623.3  |
| 24.45 | 3224.56 |
| 24.46 | 3519.28 |
| 24.47 | 3779.33 |
| 24.48 | 3709.98 |
| 24.49 | 3657.97 |

|       |         |
|-------|---------|
| 24.5  | 3605.97 |
| 24.51 | 3501.95 |
| 24.52 | 3189.89 |
| 24.53 | 3536.62 |
| 24.54 | 4074.05 |
| 24.55 | 3449.94 |
| 24.56 | 3276.57 |
| 24.57 | 3761.99 |
| 24.58 | 3449.94 |
| 24.59 | 3848.67 |
| 24.6  | 3293.91 |
| 24.61 | 3536.62 |
| 24.62 | 3241.9  |
| 24.63 | 3640.64 |
| 24.64 | 3432.6  |
| 24.65 | 3397.93 |
| 24.66 | 3120.55 |
| 24.67 | 3380.59 |
| 24.68 | 3553.96 |
| 24.69 | 3796.67 |
| 24.7  | 3761.99 |
| 24.71 | 3657.97 |
| 24.72 | 3415.26 |
| 24.73 | 3605.97 |
| 24.74 | 3276.57 |
| 24.75 | 3484.61 |
| 24.76 | 3432.6  |
| 24.77 | 4143.39 |
| 24.78 | 3970.03 |
| 24.79 | 3432.6  |
| 24.8  | 3536.62 |
| 24.81 | 3397.93 |
| 24.82 | 3588.63 |
| 24.83 | 3415.26 |
| 24.84 | 3432.6  |
| 24.85 | 3380.59 |
| 24.86 | 3866.01 |
| 24.87 | 3709.98 |
| 24.88 | 3311.25 |
| 24.89 | 3709.98 |
| 24.9  | 3709.98 |
| 24.91 | 3415.26 |
| 24.92 | 3397.93 |
| 24.93 | 3415.26 |

|       |         |
|-------|---------|
| 24.94 | 3883.35 |
| 24.95 | 3952.69 |
| 24.96 | 3970.03 |
| 24.97 | 3519.28 |
| 24.98 | 3900.68 |
| 24.99 | 3761.99 |
| 25    | 3259.24 |
| 25.01 | 3796.67 |
| 25.02 | 3744.66 |
| 25.03 | 3605.97 |
| 25.04 | 3363.26 |
| 25.05 | 3328.58 |
| 25.06 | 3761.99 |
| 25.07 | 3588.63 |
| 25.08 | 3675.31 |
| 25.09 | 3519.28 |
| 25.1  | 3744.66 |
| 25.11 | 3883.35 |
| 25.12 | 3536.62 |
| 25.13 | 3259.24 |
| 25.14 | 3467.27 |
| 25.15 | 3276.57 |
| 25.16 | 3467.27 |
| 25.17 | 3415.26 |
| 25.18 | 3293.91 |
| 25.19 | 3709.98 |
| 25.2  | 3467.27 |
| 25.21 | 3519.28 |
| 25.22 | 3467.27 |
| 25.23 | 3657.97 |
| 25.24 | 3397.93 |
| 25.25 | 3588.63 |
| 25.26 | 2999.19 |
| 25.27 | 3363.26 |
| 25.28 | 3779.33 |
| 25.29 | 3120.55 |
| 25.3  | 3657.97 |
| 25.31 | 3709.98 |
| 25.32 | 3519.28 |
| 25.33 | 3709.98 |
| 25.34 | 3241.9  |
| 25.35 | 3814    |
| 25.36 | 3605.97 |
| 25.37 | 3501.95 |

|       |         |
|-------|---------|
| 25.38 | 3553.96 |
| 25.39 | 3311.25 |
| 25.4  | 3415.26 |
| 25.41 | 3276.57 |
| 25.42 | 3328.58 |
| 25.43 | 3432.6  |
| 25.44 | 3259.24 |
| 25.45 | 3519.28 |
| 25.46 | 3796.67 |
| 25.47 | 3016.53 |
| 25.48 | 3432.6  |
| 25.49 | 3259.24 |
| 25.5  | 3501.95 |
| 25.51 | 3952.69 |
| 25.52 | 3553.96 |
| 25.53 | 3519.28 |
| 25.54 | 3727.32 |
| 25.55 | 3761.99 |
| 25.56 | 3779.33 |
| 25.57 | 3553.96 |
| 25.58 | 3207.23 |
| 25.59 | 3640.64 |
| 25.6  | 3536.62 |
| 25.61 | 3640.64 |
| 25.62 | 3536.62 |
| 25.63 | 3848.67 |
| 25.64 | 3640.64 |
| 25.65 | 3796.67 |
| 25.66 | 3623.3  |
| 25.67 | 3675.31 |
| 25.68 | 3571.29 |
| 25.69 | 3779.33 |
| 25.7  | 3224.56 |
| 25.71 | 3605.97 |
| 25.72 | 3189.89 |
| 25.73 | 3918.02 |
| 25.74 | 3675.31 |
| 25.75 | 3657.97 |
| 25.76 | 3623.3  |
| 25.77 | 3814    |
| 25.78 | 3883.35 |
| 25.79 | 3675.31 |
| 25.8  | 3657.97 |
| 25.81 | 3796.67 |

|       |         |
|-------|---------|
| 25.82 | 3779.33 |
| 25.83 | 4074.05 |
| 25.84 | 3432.6  |
| 25.85 | 4108.72 |
| 25.86 | 3779.33 |
| 25.87 | 4004.7  |
| 25.88 | 3415.26 |
| 25.89 | 3675.31 |
| 25.9  | 4178.07 |
| 25.91 | 4039.37 |
| 25.92 | 4195.4  |
| 25.93 | 4074.05 |
| 25.94 | 3675.31 |
| 25.95 | 3883.35 |
| 25.96 | 3918.02 |
| 25.97 | 3883.35 |
| 25.98 | 4802.17 |
| 25.99 | 4368.77 |
| 26    | 4490.12 |
| 26.01 | 3883.35 |
| 26.02 | 3831.34 |
| 26.03 | 3987.37 |
| 26.04 | 4334.09 |
| 26.05 | 4091.38 |
| 26.06 | 4542.13 |
| 26.07 | 3814    |
| 26.08 | 4212.74 |
| 26.09 | 3831.34 |
| 26.1  | 3640.64 |
| 26.11 | 3571.29 |
| 26.12 | 3276.57 |
| 26.13 | 3866.01 |
| 26.14 | 3848.67 |
| 26.15 | 3727.32 |
| 26.16 | 4022.04 |
| 26.17 | 3553.96 |
| 26.18 | 3155.22 |
| 26.19 | 3848.67 |
| 26.2  | 3675.31 |
| 26.21 | 3553.96 |
| 26.22 | 3744.66 |
| 26.23 | 3709.98 |
| 26.24 | 3709.98 |
| 26.25 | 3883.35 |

|       |         |
|-------|---------|
| 26.26 | 3779.33 |
| 26.27 | 3536.62 |
| 26.28 | 3588.63 |
| 26.29 | 3605.97 |
| 26.3  | 3727.32 |
| 26.31 | 3432.6  |
| 26.32 | 3657.97 |
| 26.33 | 3623.3  |
| 26.34 | 3744.66 |
| 26.35 | 3571.29 |
| 26.36 | 3709.98 |
| 26.37 | 3779.33 |
| 26.38 | 3709.98 |
| 26.39 | 3172.56 |
| 26.4  | 3623.3  |
| 26.41 | 3640.64 |
| 26.42 | 3935.36 |
| 26.43 | 3588.63 |
| 26.44 | 4316.76 |
| 26.45 | 4160.73 |
| 26.46 | 3987.37 |
| 26.47 | 4195.4  |
| 26.48 | 3657.97 |
| 26.49 | 3814    |
| 26.5  | 3952.69 |
| 26.51 | 3970.03 |
| 26.52 | 4160.73 |
| 26.53 | 3796.67 |
| 26.54 | 3761.99 |
| 26.55 | 3709.98 |
| 26.56 | 4160.73 |
| 26.57 | 4108.72 |
| 26.58 | 3935.36 |
| 26.59 | 4542.13 |
| 26.6  | 4542.13 |
| 26.61 | 4611.47 |
| 26.62 | 4386.1  |
| 26.63 | 4403.44 |
| 26.64 | 4784.84 |
| 26.65 | 4507.46 |
| 26.66 | 4542.13 |
| 26.67 | 4264.75 |
| 26.68 | 4490.12 |
| 26.69 | 3918.02 |

|       |         |
|-------|---------|
| 26.7  | 4368.77 |
| 26.71 | 3848.67 |
| 26.72 | 4559.47 |
| 26.73 | 3987.37 |
| 26.74 | 3796.67 |
| 26.75 | 4178.07 |
| 26.76 | 3848.67 |
| 26.77 | 3744.66 |
| 26.78 | 3657.97 |
| 26.79 | 4108.72 |
| 26.8  | 3935.36 |
| 26.81 | 3796.67 |
| 26.82 | 3987.37 |
| 26.83 | 3709.98 |
| 26.84 | 3484.61 |
| 26.85 | 3675.31 |
| 26.86 | 3553.96 |
| 26.87 | 3692.65 |
| 26.88 | 3692.65 |
| 26.89 | 3935.36 |
| 26.9  | 3207.23 |
| 26.91 | 3796.67 |
| 26.92 | 4108.72 |
| 26.93 | 4022.04 |
| 26.94 | 3744.66 |
| 26.95 | 3709.98 |
| 26.96 | 3692.65 |
| 26.97 | 3189.89 |
| 26.98 | 3623.3  |
| 26.99 | 4039.37 |
| 27    | 3571.29 |
| 27.01 | 3519.28 |
| 27.02 | 3623.3  |
| 27.03 | 3605.97 |
| 27.04 | 3831.34 |
| 27.05 | 3536.62 |
| 27.06 | 3363.26 |
| 27.07 | 3449.94 |
| 27.08 | 3640.64 |
| 27.09 | 3363.26 |
| 27.1  | 3588.63 |
| 27.11 | 3918.02 |
| 27.12 | 3831.34 |
| 27.13 | 4143.39 |



|       |         |
|-------|---------|
| 27.14 | 3501.95 |
| 27.15 | 3727.32 |
| 27.16 | 3952.69 |
| 27.17 | 3866.01 |
| 27.18 | 3883.35 |
| 27.19 | 4056.71 |
| 27.2  | 3363.26 |
| 27.21 | 3814    |
| 27.22 | 3918.02 |
| 27.23 | 3484.61 |
| 27.24 | 4160.73 |
| 27.25 | 3692.65 |
| 27.26 | 3519.28 |
| 27.27 | 4282.08 |
| 27.28 | 4160.73 |
| 27.29 | 3571.29 |
| 27.3  | 3866.01 |
| 27.31 | 3623.3  |
| 27.32 | 3397.93 |
| 27.33 | 3449.94 |
| 27.34 | 3501.95 |
| 27.35 | 3761.99 |
| 27.36 | 4056.71 |
| 27.37 | 3814    |
| 27.38 | 3605.97 |
| 27.39 | 4195.4  |
| 27.4  | 3918.02 |
| 27.41 | 3675.31 |
| 27.42 | 3761.99 |
| 27.43 | 3692.65 |
| 27.44 | 3900.68 |
| 27.45 | 4178.07 |
| 27.46 | 3814    |
| 27.47 | 3675.31 |
| 27.48 | 3744.66 |
| 27.49 | 3883.35 |
| 27.5  | 3553.96 |
| 27.51 | 4091.38 |
| 27.52 | 3467.27 |
| 27.53 | 3449.94 |
| 27.54 | 3415.26 |
| 27.55 | 3675.31 |
| 27.56 | 3605.97 |
| 27.57 | 3640.64 |

|       |         |
|-------|---------|
| 27.58 | 3727.32 |
| 27.59 | 3553.96 |
| 27.6  | 3814    |
| 27.61 | 3952.69 |
| 27.62 | 3692.65 |
| 27.63 | 3831.34 |
| 27.64 | 3866.01 |
| 27.65 | 3276.57 |
| 27.66 | 3623.3  |
| 27.67 | 3605.97 |
| 27.68 | 3900.68 |
| 27.69 | 3761.99 |
| 27.7  | 3779.33 |
| 27.71 | 3553.96 |
| 27.72 | 3935.36 |
| 27.73 | 3484.61 |
| 27.74 | 3397.93 |
| 27.75 | 3744.66 |
| 27.76 | 3692.65 |
| 27.77 | 4126.06 |
| 27.78 | 3727.32 |
| 27.79 | 3883.35 |
| 27.8  | 4143.39 |
| 27.81 | 3987.37 |
| 27.82 | 3553.96 |
| 27.83 | 3918.02 |
| 27.84 | 4212.74 |
| 27.85 | 3692.65 |
| 27.86 | 3397.93 |
| 27.87 | 3709.98 |
| 27.88 | 3831.34 |
| 27.89 | 3519.28 |
| 27.9  | 3796.67 |
| 27.91 | 3657.97 |
| 27.92 | 3761.99 |
| 27.93 | 3918.02 |
| 27.94 | 3935.36 |
| 27.95 | 4004.7  |
| 27.96 | 3900.68 |
| 27.97 | 4126.06 |
| 27.98 | 3796.67 |
| 27.99 | 4091.38 |
| 28    | 3970.03 |
| 28.01 | 4316.76 |

|       |         |
|-------|---------|
| 28.02 | 3727.32 |
| 28.03 | 4316.76 |
| 28.04 | 3866.01 |
| 28.05 | 3848.67 |
| 28.06 | 3640.64 |
| 28.07 | 3397.93 |
| 28.08 | 4039.37 |
| 28.09 | 3675.31 |
| 28.1  | 3605.97 |
| 28.11 | 3675.31 |
| 28.12 | 3709.98 |
| 28.13 | 3970.03 |
| 28.14 | 3970.03 |
| 28.15 | 4091.38 |
| 28.16 | 3970.03 |
| 28.17 | 4108.72 |
| 28.18 | 3987.37 |
| 28.19 | 4490.12 |
| 28.2  | 4108.72 |
| 28.21 | 4854.18 |
| 28.22 | 3952.69 |
| 28.23 | 4230.07 |
| 28.24 | 4074.05 |
| 28.25 | 4160.73 |
| 28.26 | 3744.66 |
| 28.27 | 3900.68 |
| 28.28 | 3970.03 |
| 28.29 | 3449.94 |
| 28.3  | 3831.34 |
| 28.31 | 4004.7  |
| 28.32 | 3814    |
| 28.33 | 4004.7  |
| 28.34 | 4004.7  |
| 28.35 | 4108.72 |
| 28.36 | 4108.72 |
| 28.37 | 4108.72 |
| 28.38 | 4126.06 |
| 28.39 | 4559.47 |
| 28.4  | 4299.42 |
| 28.41 | 3952.69 |
| 28.42 | 4438.11 |
| 28.43 | 4143.39 |
| 28.44 | 3883.35 |
| 28.45 | 4212.74 |

|       |         |
|-------|---------|
| 28.46 | 4316.76 |
| 28.47 | 4230.07 |
| 28.48 | 3918.02 |
| 28.49 | 3831.34 |
| 28.5  | 4264.75 |
| 28.51 | 4230.07 |
| 28.52 | 4628.81 |
| 28.53 | 4611.47 |
| 28.54 | 4403.44 |
| 28.55 | 4784.84 |
| 28.56 | 4767.5  |
| 28.57 | 4767.5  |
| 28.58 | 4715.49 |
| 28.59 | 4576.8  |
| 28.6  | 4663.48 |
| 28.61 | 4611.47 |
| 28.62 | 4906.19 |
| 28.63 | 4888.86 |
| 28.64 | 5131.57 |
| 28.65 | 4802.17 |
| 28.66 | 5183.57 |
| 28.67 | 4836.85 |
| 28.68 | 5148.9  |
| 28.69 | 4836.85 |
| 28.7  | 5426.28 |
| 28.71 | 4854.18 |
| 28.72 | 4854.18 |
| 28.73 | 4802.17 |
| 28.74 | 4680.82 |
| 28.75 | 4906.19 |
| 28.76 | 4871.52 |
| 28.77 | 4663.48 |
| 28.78 | 4906.19 |
| 28.79 | 4836.85 |
| 28.8  | 5096.89 |
| 28.81 | 5304.93 |
| 28.82 | 5096.89 |
| 28.83 | 5166.24 |
| 28.84 | 5547.64 |
| 28.85 | 5495.63 |
| 28.86 | 4940.87 |
| 28.87 | 5530.3  |
| 28.88 | 5408.95 |
| 28.89 | 4888.86 |

|       |         |
|-------|---------|
| 28.9  | 5044.88 |
| 28.91 | 5044.88 |
| 28.92 | 5096.89 |
| 28.93 | 4646.15 |
| 28.94 | 4767.5  |
| 28.95 | 5790.35 |
| 28.96 | 5547.64 |
| 28.97 | 5287.59 |
| 28.98 | 5304.93 |
| 28.99 | 5408.95 |
| 29    | 5443.62 |
| 29.01 | 5547.64 |
| 29.02 | 5651.66 |
| 29.03 | 5079.56 |
| 29.04 | 5773.01 |
| 29.05 | 5773.01 |
| 29.06 | 5877.03 |
| 29.07 | 5981.05 |
| 29.08 | 6258.43 |
| 29.09 | 6102.4  |
| 29.1  | 7090.58 |
| 29.11 | 6275.77 |
| 29.12 | 6535.81 |
| 29.13 | 7454.64 |
| 29.14 | 7315.95 |
| 29.15 | 7575.99 |
| 29.16 | 7922.72 |
| 29.17 | 7697.35 |
| 29.18 | 8182.77 |
| 29.19 | 9205.61 |
| 29.2  | 8893.56 |
| 29.21 | 9933.74 |
| 29.22 | 10800.6 |
| 29.23 | 10332.5 |
| 29.24 | 10765.9 |
| 29.25 | 11996.8 |
| 29.26 | 13002.3 |
| 29.27 | 13279.7 |
| 29.28 | 14753.3 |
| 29.29 | 15117.3 |
| 29.3  | 17180.3 |
| 29.31 | 17579.1 |
| 29.32 | 19052.7 |
| 29.33 | 21029   |

|       |         |
|-------|---------|
| 29.34 | 23577.5 |
| 29.35 | 24461.6 |
| 29.36 | 25987.2 |
| 29.37 | 28171.6 |
| 29.38 | 29939.9 |
| 29.39 | 33736.6 |
| 29.4  | 37273.2 |
| 29.41 | 40844.5 |
| 29.42 | 43791.7 |
| 29.43 | 48715.2 |
| 29.44 | 52009.1 |
| 29.45 | 57868.8 |
| 29.46 | 62688.3 |
| 29.47 | 67975.9 |
| 29.48 | 73194.2 |
| 29.49 | 80319.4 |
| 29.5  | 86491.2 |
| 29.51 | 96719.6 |
| 29.52 | 99476.1 |
| 29.53 | 105717  |
| 29.54 | 108976  |
| 29.55 | 112964  |
| 29.56 | 111456  |
| 29.57 | 109219  |
| 29.58 | 107416  |
| 29.59 | 101869  |
| 29.6  | 95800.8 |
| 29.61 | 90686.6 |
| 29.62 | 84237.4 |
| 29.63 | 80700.8 |
| 29.64 | 73454.2 |
| 29.65 | 67715.9 |
| 29.66 | 61752.2 |
| 29.67 | 54626.9 |
| 29.68 | 48160.4 |
| 29.69 | 42266.1 |
| 29.7  | 37498.6 |
| 29.71 | 35678.3 |
| 29.72 | 32176.3 |
| 29.73 | 28570.3 |
| 29.74 | 25640.5 |
| 29.75 | 24652.3 |
| 29.76 | 22485.3 |
| 29.77 | 21115.7 |

|       |         |
|-------|---------|
| 29.78 | 19503.4 |
| 29.79 | 18983.3 |
| 29.8  | 16798.9 |
| 29.81 | 14753.3 |
| 29.82 | 14545.2 |
| 29.83 | 13591.7 |
| 29.84 | 13522.4 |
| 29.85 | 12898.3 |
| 29.86 | 11719.4 |
| 29.87 | 11858.1 |
| 29.88 | 10939.3 |
| 29.89 | 10055.1 |
| 29.9  | 9535    |
| 29.91 | 9587.01 |
| 29.92 | 9274.96 |
| 29.93 | 9535    |
| 29.94 | 8945.57 |
| 29.95 | 8252.11 |
| 29.96 | 8425.48 |
| 29.97 | 7732.02 |
| 29.98 | 7523.98 |
| 29.99 | 7419.97 |
| 30    | 7263.94 |
| 30.01 | 7610.67 |
| 30.02 | 7281.28 |
| 30.03 | 6397.12 |
| 30.04 | 6431.79 |
| 30.05 | 6899.88 |
| 30.06 | 6310.44 |
| 30.07 | 6691.84 |
| 30.08 | 6379.78 |
| 30.09 | 6535.81 |
| 30.1  | 6327.78 |
| 30.11 | 6431.79 |
| 30.12 | 5894.37 |
| 30.13 | 6050.39 |
| 30.14 | 6431.79 |
| 30.15 | 5443.62 |
| 30.16 | 5564.98 |
| 30.17 | 5790.35 |
| 30.18 | 5495.63 |
| 30.19 | 5079.56 |
| 30.2  | 5166.24 |
| 30.21 | 5582.31 |

30.22 5114.23  
30.23 5287.59  
30.24 5044.88  
30.25 5183.57  
30.26 4715.49  
30.27 5391.61  
30.28 5114.23  
30.29 4802.17  
30.3 5062.22  
30.31 5148.9  
30.32 4819.51  
30.33 5114.23  
30.34 4940.87  
30.35 4732.83  
30.36 4576.8  
30.37 5148.9  
30.38 4559.47  
30.39 4594.14  
30.4 4732.83  
30.41 4611.47  
30.42 4992.87  
30.43 4680.82  
30.44 4438.11  
30.45 3970.03  
30.46 4732.83  
30.47 4663.48  
30.48 4230.07  
30.49 5218.25  
30.5 4888.86  
30.51 4698.16  
30.52 4940.87  
30.53 5044.88  
30.54 4992.87  
30.55 5010.21  
30.56 4732.83  
30.57 4507.46  
30.58 4975.54  
30.59 5218.25  
30.6 4958.2  
30.61 5183.57  
30.62 5599.65  
30.63 5391.61  
30.64 5634.32  
30.65 5773.01



|       |         |
|-------|---------|
| 30.66 | 5616.98 |
| 30.67 | 5807.68 |
| 30.68 | 5842.36 |
| 30.69 | 5929.04 |
| 30.7  | 5807.68 |
| 30.71 | 5582.31 |
| 30.72 | 5946.38 |
| 30.73 | 5703.67 |
| 30.74 | 5218.25 |
| 30.75 | 5252.92 |
| 30.76 | 5131.57 |
| 30.77 | 5304.93 |
| 30.78 | 4680.82 |
| 30.79 | 5114.23 |
| 30.8  | 4836.85 |
| 30.81 | 4594.14 |
| 30.82 | 4160.73 |
| 30.83 | 4524.79 |
| 30.84 | 4611.47 |
| 30.85 | 4750.17 |
| 30.86 | 4178.07 |
| 30.87 | 4351.43 |
| 30.88 | 4299.42 |
| 30.89 | 4126.06 |
| 30.9  | 4212.74 |
| 30.91 | 4646.15 |
| 30.92 | 4559.47 |
| 30.93 | 4316.76 |
| 30.94 | 4472.78 |
| 30.95 | 4316.76 |
| 30.96 | 3779.33 |
| 30.97 | 3970.03 |
| 30.98 | 4022.04 |
| 30.99 | 3987.37 |
| 31    | 4126.06 |
| 31.01 | 3970.03 |
| 31.02 | 4247.41 |
| 31.03 | 4108.72 |
| 31.04 | 3935.36 |
| 31.05 | 4074.05 |
| 31.06 | 4455.45 |
| 31.07 | 4299.42 |
| 31.08 | 3692.65 |
| 31.09 | 4126.06 |

|       |         |
|-------|---------|
| 31.1  | 4524.79 |
| 31.11 | 3987.37 |
| 31.12 | 4143.39 |
| 31.13 | 4056.71 |
| 31.14 | 3935.36 |
| 31.15 | 4178.07 |
| 31.16 | 4126.06 |
| 31.17 | 4074.05 |
| 31.18 | 3935.36 |
| 31.19 | 3883.35 |
| 31.2  | 3519.28 |
| 31.21 | 4160.73 |
| 31.22 | 3987.37 |
| 31.23 | 3796.67 |
| 31.24 | 4022.04 |
| 31.25 | 4299.42 |
| 31.26 | 3970.03 |
| 31.27 | 3709.98 |
| 31.28 | 4403.44 |
| 31.29 | 4022.04 |
| 31.3  | 4108.72 |
| 31.31 | 4386.1  |
| 31.32 | 4455.45 |
| 31.33 | 3848.67 |
| 31.34 | 3935.36 |
| 31.35 | 4490.12 |
| 31.36 | 4282.08 |
| 31.37 | 4524.79 |
| 31.38 | 4282.08 |
| 31.39 | 4195.4  |
| 31.4  | 4074.05 |
| 31.41 | 4420.77 |
| 31.42 | 4611.47 |
| 31.43 | 4490.12 |
| 31.44 | 5044.88 |
| 31.45 | 4975.54 |
| 31.46 | 5183.57 |
| 31.47 | 4906.19 |
| 31.48 | 5426.28 |
| 31.49 | 5356.94 |
| 31.5  | 5530.3  |
| 31.51 | 5981.05 |
| 31.52 | 5773.01 |
| 31.53 | 6605.16 |

|       |         |
|-------|---------|
| 31.54 | 6639.83 |
| 31.55 | 6795.86 |
| 31.56 | 6518.48 |
| 31.57 | 6293.1  |
| 31.58 | 6726.51 |
| 31.59 | 6189.08 |
| 31.6  | 6622.49 |
| 31.61 | 5929.04 |
| 31.62 | 6639.83 |
| 31.63 | 5859.69 |
| 31.64 | 5721    |
| 31.65 | 5183.57 |
| 31.66 | 5877.03 |
| 31.67 | 6119.74 |
| 31.68 | 5408.95 |
| 31.69 | 5200.91 |
| 31.7  | 5339.6  |
| 31.71 | 5062.22 |
| 31.72 | 5114.23 |
| 31.73 | 4698.16 |
| 31.74 | 5062.22 |
| 31.75 | 4542.13 |
| 31.76 | 4022.04 |
| 31.77 | 4368.77 |
| 31.78 | 4836.85 |
| 31.79 | 4126.06 |
| 31.8  | 4403.44 |
| 31.81 | 3883.35 |
| 31.82 | 3814    |
| 31.83 | 3900.68 |
| 31.84 | 3883.35 |
| 31.85 | 4490.12 |
| 31.86 | 3918.02 |
| 31.87 | 4368.77 |
| 31.88 | 3866.01 |
| 31.89 | 3918.02 |
| 31.9  | 3987.37 |
| 31.91 | 4247.41 |
| 31.92 | 3623.3  |
| 31.93 | 3640.64 |
| 31.94 | 3831.34 |
| 31.95 | 3883.35 |
| 31.96 | 3900.68 |
| 31.97 | 3918.02 |

|       |         |
|-------|---------|
| 31.98 | 3744.66 |
| 31.99 | 3519.28 |
| 32    | 3397.93 |
| 32.01 | 3415.26 |
| 32.02 | 3866.01 |
| 32.03 | 3744.66 |
| 32.04 | 3432.6  |
| 32.05 | 3657.97 |
| 32.06 | 3397.93 |
| 32.07 | 3571.29 |
| 32.08 | 3761.99 |
| 32.09 | 3519.28 |
| 32.1  | 3640.64 |
| 32.11 | 4056.71 |
| 32.12 | 3657.97 |
| 32.13 | 4386.1  |
| 32.14 | 3692.65 |
| 32.15 | 4056.71 |
| 32.16 | 3553.96 |
| 32.17 | 3328.58 |
| 32.18 | 3709.98 |
| 32.19 | 3918.02 |
| 32.2  | 3588.63 |
| 32.21 | 3761.99 |
| 32.22 | 3623.3  |
| 32.23 | 4022.04 |
| 32.24 | 3848.67 |
| 32.25 | 3241.9  |
| 32.26 | 3415.26 |
| 32.27 | 3467.27 |
| 32.28 | 3432.6  |
| 32.29 | 3519.28 |
| 32.3  | 3501.95 |
| 32.31 | 3553.96 |
| 32.32 | 3103.21 |
| 32.33 | 3397.93 |
| 32.34 | 3866.01 |
| 32.35 | 3501.95 |
| 32.36 | 3814    |
| 32.37 | 3553.96 |
| 32.38 | 3848.67 |
| 32.39 | 3553.96 |
| 32.4  | 3744.66 |
| 32.41 | 3293.91 |

|       |         |
|-------|---------|
| 32.42 | 3415.26 |
| 32.43 | 3623.3  |
| 32.44 | 3935.36 |
| 32.45 | 3640.64 |
| 32.46 | 3918.02 |
| 32.47 | 3657.97 |
| 32.48 | 4022.04 |
| 32.49 | 4022.04 |
| 32.5  | 4126.06 |
| 32.51 | 3814    |
| 32.52 | 3935.36 |
| 32.53 | 4126.06 |
| 32.54 | 4074.05 |
| 32.55 | 3519.28 |
| 32.56 | 4195.4  |
| 32.57 | 4022.04 |
| 32.58 | 3640.64 |
| 32.59 | 3952.69 |
| 32.6  | 4212.74 |
| 32.61 | 3709.98 |
| 32.62 | 4004.7  |
| 32.63 | 3692.65 |
| 32.64 | 3814    |
| 32.65 | 3345.92 |
| 32.66 | 3657.97 |
| 32.67 | 3259.24 |
| 32.68 | 3779.33 |
| 32.69 | 3727.32 |
| 32.7  | 3259.24 |
| 32.71 | 3016.53 |
| 32.72 | 3293.91 |
| 32.73 | 3501.95 |
| 32.74 | 3605.97 |
| 32.75 | 3952.69 |
| 32.76 | 3588.63 |
| 32.77 | 3605.97 |
| 32.78 | 3085.87 |
| 32.79 | 3120.55 |
| 32.8  | 3363.26 |
| 32.81 | 3172.56 |
| 32.82 | 3207.23 |
| 32.83 | 3276.57 |
| 32.84 | 3103.21 |
| 32.85 | 3172.56 |

|       |         |
|-------|---------|
| 32.86 | 3571.29 |
| 32.87 | 3293.91 |
| 32.88 | 3207.23 |
| 32.89 | 3224.56 |
| 32.9  | 3415.26 |
| 32.91 | 3189.89 |
| 32.92 | 3224.56 |
| 32.93 | 3137.88 |
| 32.94 | 3345.92 |
| 32.95 | 3553.96 |
| 32.96 | 3519.28 |
| 32.97 | 3519.28 |
| 32.98 | 3484.61 |
| 32.99 | 3293.91 |
| 33    | 3571.29 |
| 33.01 | 3224.56 |
| 33.02 | 3207.23 |
| 33.03 | 3137.88 |
| 33.04 | 2912.51 |
| 33.05 | 3224.56 |
| 33.06 | 3397.93 |
| 33.07 | 3224.56 |
| 33.08 | 3311.25 |
| 33.09 | 3224.56 |
| 33.1  | 3328.58 |
| 33.11 | 3207.23 |
| 33.12 | 3311.25 |
| 33.13 | 3605.97 |
| 33.14 | 3276.57 |
| 33.15 | 3224.56 |
| 33.16 | 3415.26 |
| 33.17 | 3380.59 |
| 33.18 | 3345.92 |
| 33.19 | 3397.93 |
| 33.2  | 3293.91 |
| 33.21 | 3345.92 |
| 33.22 | 2999.19 |
| 33.23 | 2721.81 |
| 33.24 | 3276.57 |
| 33.25 | 2981.86 |
| 33.26 | 3259.24 |
| 33.27 | 3536.62 |
| 33.28 | 3588.63 |
| 33.29 | 3241.9  |

|       |         |
|-------|---------|
| 33.3  | 3189.89 |
| 33.31 | 2999.19 |
| 33.32 | 3033.86 |
| 33.33 | 3120.55 |
| 33.34 | 3085.87 |
| 33.35 | 3259.24 |
| 33.36 | 3345.92 |
| 33.37 | 3033.86 |
| 33.38 | 3363.26 |
| 33.39 | 3172.56 |
| 33.4  | 2999.19 |
| 33.41 | 3276.57 |
| 33.42 | 3484.61 |
| 33.43 | 3120.55 |
| 33.44 | 3259.24 |
| 33.45 | 3033.86 |
| 33.46 | 3397.93 |
| 33.47 | 3293.91 |
| 33.48 | 3207.23 |
| 33.49 | 3224.56 |
| 33.5  | 3068.54 |
| 33.51 | 3241.9  |
| 33.52 | 3137.88 |
| 33.53 | 3189.89 |
| 33.54 | 3051.2  |
| 33.55 | 2791.16 |
| 33.56 | 3380.59 |
| 33.57 | 3120.55 |
| 33.58 | 3068.54 |
| 33.59 | 3276.57 |
| 33.6  | 3051.2  |
| 33.61 | 3172.56 |
| 33.62 | 3363.26 |
| 33.63 | 2860.5  |
| 33.64 | 3016.53 |
| 33.65 | 3207.23 |
| 33.66 | 2929.85 |
| 33.67 | 3189.89 |
| 33.68 | 3068.54 |
| 33.69 | 3189.89 |
| 33.7  | 2808.49 |
| 33.71 | 3120.55 |
| 33.72 | 3207.23 |
| 33.73 | 3380.59 |

|       |         |
|-------|---------|
| 33.74 | 3103.21 |
| 33.75 | 3189.89 |
| 33.76 | 3311.25 |
| 33.77 | 3397.93 |
| 33.78 | 2947.18 |
| 33.79 | 2825.83 |
| 33.8  | 3224.56 |
| 33.81 | 3068.54 |
| 33.82 | 3501.95 |
| 33.83 | 3328.58 |
| 33.84 | 3085.87 |
| 33.85 | 2947.18 |
| 33.86 | 2999.19 |
| 33.87 | 3328.58 |
| 33.88 | 2756.48 |
| 33.89 | 3449.94 |
| 33.9  | 3831.34 |
| 33.91 | 3293.91 |
| 33.92 | 3051.2  |
| 33.93 | 2964.52 |
| 33.94 | 2895.17 |
| 33.95 | 3484.61 |
| 33.96 | 3501.95 |
| 33.97 | 3207.23 |
| 33.98 | 3033.86 |
| 33.99 | 3189.89 |
| 34    | 3120.55 |
| 34.01 | 3155.22 |
| 34.02 | 3085.87 |
| 34.03 | 3172.56 |
| 34.04 | 3293.91 |
| 34.05 | 3103.21 |
| 34.06 | 3172.56 |
| 34.07 | 2999.19 |
| 34.08 | 3328.58 |
| 34.09 | 3207.23 |
| 34.1  | 2756.48 |
| 34.11 | 3293.91 |
| 34.12 | 3137.88 |
| 34.13 | 3051.2  |
| 34.14 | 3051.2  |
| 34.15 | 3189.89 |
| 34.16 | 3207.23 |
| 34.17 | 3276.57 |



|       |         |
|-------|---------|
| 34.18 | 3137.88 |
| 34.19 | 3224.56 |
| 34.2  | 3085.87 |
| 34.21 | 2721.81 |
| 34.22 | 2843.16 |
| 34.23 | 2947.18 |
| 34.24 | 3224.56 |
| 34.25 | 3068.54 |
| 34.26 | 3345.92 |
| 34.27 | 3675.31 |
| 34.28 | 2999.19 |
| 34.29 | 3293.91 |
| 34.3  | 3051.2  |
| 34.31 | 2843.16 |
| 34.32 | 3172.56 |
| 34.33 | 3241.9  |
| 34.34 | 3259.24 |
| 34.35 | 2652.46 |
| 34.36 | 2843.16 |
| 34.37 | 3051.2  |
| 34.38 | 3293.91 |
| 34.39 | 3623.3  |
| 34.4  | 2895.17 |
| 34.41 | 2704.47 |
| 34.42 | 3085.87 |
| 34.43 | 2773.82 |
| 34.44 | 3467.27 |
| 34.45 | 2895.17 |
| 34.46 | 2773.82 |
| 34.47 | 3328.58 |
| 34.48 | 3224.56 |
| 34.49 | 3051.2  |
| 34.5  | 3016.53 |
| 34.51 | 3051.2  |
| 34.52 | 3137.88 |
| 34.53 | 3484.61 |
| 34.54 | 3103.21 |
| 34.55 | 3120.55 |
| 34.56 | 2791.16 |
| 34.57 | 2860.5  |
| 34.58 | 2825.83 |
| 34.59 | 3276.57 |
| 34.6  | 3068.54 |
| 34.61 | 3051.2  |

|       |         |
|-------|---------|
| 34.62 | 2669.8  |
| 34.63 | 3588.63 |
| 34.64 | 2964.52 |
| 34.65 | 3137.88 |
| 34.66 | 3189.89 |
| 34.67 | 2929.85 |
| 34.68 | 3311.25 |
| 34.69 | 3397.93 |
| 34.7  | 3207.23 |
| 34.71 | 3259.24 |
| 34.72 | 3397.93 |
| 34.73 | 3449.94 |
| 34.74 | 2981.86 |
| 34.75 | 3085.87 |
| 34.76 | 3172.56 |
| 34.77 | 2981.86 |
| 34.78 | 3519.28 |
| 34.79 | 3345.92 |
| 34.8  | 3501.95 |
| 34.81 | 3293.91 |
| 34.82 | 3484.61 |
| 34.83 | 3120.55 |
| 34.84 | 3311.25 |
| 34.85 | 3345.92 |
| 34.86 | 2895.17 |
| 34.87 | 2929.85 |
| 34.88 | 2808.49 |
| 34.89 | 2721.81 |
| 34.9  | 3033.86 |
| 34.91 | 2877.84 |
| 34.92 | 3276.57 |
| 34.93 | 2999.19 |
| 34.94 | 3415.26 |
| 34.95 | 3051.2  |
| 34.96 | 2739.15 |
| 34.97 | 2860.5  |
| 34.98 | 2912.51 |
| 34.99 | 2912.51 |
| 35    | 2912.51 |
| 35.01 | 2999.19 |
| 35.02 | 2843.16 |
| 35.03 | 2739.15 |
| 35.04 | 2999.19 |
| 35.05 | 3259.24 |

|       |         |
|-------|---------|
| 35.06 | 2825.83 |
| 35.07 | 3103.21 |
| 35.08 | 2999.19 |
| 35.09 | 2756.48 |
| 35.1  | 3085.87 |
| 35.11 | 2721.81 |
| 35.12 | 3189.89 |
| 35.13 | 3224.56 |
| 35.14 | 3085.87 |
| 35.15 | 3016.53 |
| 35.16 | 2947.18 |
| 35.17 | 2600.46 |
| 35.18 | 3103.21 |
| 35.19 | 3033.86 |
| 35.2  | 3311.25 |
| 35.21 | 3293.91 |
| 35.22 | 3172.56 |
| 35.23 | 2860.5  |
| 35.24 | 3120.55 |
| 35.25 | 2739.15 |
| 35.26 | 3085.87 |
| 35.27 | 3033.86 |
| 35.28 | 3051.2  |
| 35.29 | 3068.54 |
| 35.3  | 3155.22 |
| 35.31 | 3363.26 |
| 35.32 | 2877.84 |
| 35.33 | 2860.5  |
| 35.34 | 2981.86 |
| 35.35 | 3345.92 |
| 35.36 | 2808.49 |
| 35.37 | 2999.19 |
| 35.38 | 3068.54 |
| 35.39 | 3051.2  |
| 35.4  | 3137.88 |
| 35.41 | 3207.23 |
| 35.42 | 3016.53 |
| 35.43 | 2669.8  |
| 35.44 | 2652.46 |
| 35.45 | 2999.19 |
| 35.46 | 2912.51 |
| 35.47 | 2843.16 |
| 35.48 | 2721.81 |
| 35.49 | 3016.53 |

|       |         |
|-------|---------|
| 35.5  | 3051.2  |
| 35.51 | 2721.81 |
| 35.52 | 2877.84 |
| 35.53 | 2652.46 |
| 35.54 | 2756.48 |
| 35.55 | 3293.91 |
| 35.56 | 3120.55 |
| 35.57 | 2739.15 |
| 35.58 | 2929.85 |
| 35.59 | 3033.86 |
| 35.6  | 2635.13 |
| 35.61 | 3259.24 |
| 35.62 | 3155.22 |
| 35.63 | 3016.53 |
| 35.64 | 3363.26 |
| 35.65 | 3345.92 |
| 35.66 | 2843.16 |
| 35.67 | 2843.16 |
| 35.68 | 3016.53 |
| 35.69 | 3415.26 |
| 35.7  | 3120.55 |
| 35.71 | 2860.5  |
| 35.72 | 2895.17 |
| 35.73 | 3397.93 |
| 35.74 | 3224.56 |
| 35.75 | 3172.56 |
| 35.76 | 3224.56 |
| 35.77 | 3605.97 |
| 35.78 | 3692.65 |
| 35.79 | 3866.01 |
| 35.8  | 3814    |
| 35.81 | 3935.36 |
| 35.82 | 3918.02 |
| 35.83 | 4143.39 |
| 35.84 | 4039.37 |
| 35.85 | 3952.69 |
| 35.86 | 4247.41 |
| 35.87 | 4455.45 |
| 35.88 | 4646.15 |
| 35.89 | 4403.44 |
| 35.9  | 5079.56 |
| 35.91 | 4888.86 |
| 35.92 | 5062.22 |
| 35.93 | 5252.92 |

|       |         |
|-------|---------|
| 35.94 | 5790.35 |
| 35.95 | 5981.05 |
| 35.96 | 6379.78 |
| 35.97 | 6622.49 |
| 35.98 | 7714.69 |
| 35.99 | 7575.99 |
| 36    | 8442.81 |
| 36.01 | 7957.39 |
| 36.02 | 8720.19 |
| 36.03 | 9795.05 |
| 36.04 | 10211.1 |
| 36.05 | 11147.3 |
| 36.06 | 11234   |
| 36.07 | 12066.1 |
| 36.08 | 12863.6 |
| 36.09 | 13869.1 |
| 36.1  | 14961.3 |
| 36.11 | 15152   |
| 36.12 | 15568.1 |
| 36.13 | 16105.5 |
| 36.14 | 15932.1 |
| 36.15 | 15169.3 |
| 36.16 | 14527.9 |
| 36.17 | 14735.9 |
| 36.18 | 13678.4 |
| 36.19 | 13123.6 |
| 36.2  | 12811.6 |
| 36.21 | 12950.3 |
| 36.22 | 12256.8 |
| 36.23 | 11320.7 |
| 36.24 | 10696.5 |
| 36.25 | 9153.6  |
| 36.26 | 9847.06 |
| 36.27 | 8165.43 |
| 36.28 | 7888.05 |
| 36.29 | 7003.89 |
| 36.3  | 6587.82 |
| 36.31 | 6050.39 |
| 36.32 | 6189.08 |
| 36.33 | 5911.7  |
| 36.34 | 5114.23 |
| 36.35 | 5148.9  |
| 36.36 | 4715.49 |
| 36.37 | 4368.77 |

|       |         |
|-------|---------|
| 36.38 | 4212.74 |
| 36.39 | 3848.67 |
| 36.4  | 4108.72 |
| 36.41 | 3848.67 |
| 36.42 | 3692.65 |
| 36.43 | 4039.37 |
| 36.44 | 2999.19 |
| 36.45 | 3657.97 |
| 36.46 | 3536.62 |
| 36.47 | 3553.96 |
| 36.48 | 3467.27 |
| 36.49 | 3051.2  |
| 36.5  | 3363.26 |
| 36.51 | 3085.87 |
| 36.52 | 2721.81 |
| 36.53 | 2999.19 |
| 36.54 | 3068.54 |
| 36.55 | 3501.95 |
| 36.56 | 3467.27 |
| 36.57 | 3120.55 |
| 36.58 | 2721.81 |
| 36.59 | 2964.52 |
| 36.6  | 2687.14 |
| 36.61 | 3328.58 |
| 36.62 | 2773.82 |
| 36.63 | 2895.17 |
| 36.64 | 2964.52 |
| 36.65 | 2999.19 |
| 36.66 | 2739.15 |
| 36.67 | 2825.83 |
| 36.68 | 2617.79 |
| 36.69 | 2531.11 |
| 36.7  | 2704.47 |
| 36.71 | 2773.82 |
| 36.72 | 2895.17 |
| 36.73 | 2999.19 |
| 36.74 | 2791.16 |
| 36.75 | 2565.78 |
| 36.76 | 2791.16 |
| 36.77 | 2357.75 |
| 36.78 | 2669.8  |
| 36.79 | 2392.42 |
| 36.8  | 2617.79 |
| 36.81 | 2565.78 |

|       |         |
|-------|---------|
| 36.82 | 2929.85 |
| 36.83 | 2791.16 |
| 36.84 | 2756.48 |
| 36.85 | 2687.14 |
| 36.86 | 2479.1  |
| 36.87 | 2583.12 |
| 36.88 | 2617.79 |
| 36.89 | 2496.44 |
| 36.9  | 2461.76 |
| 36.91 | 2479.1  |
| 36.92 | 2323.07 |
| 36.93 | 2600.46 |
| 36.94 | 2721.81 |
| 36.95 | 2288.4  |
| 36.96 | 2340.41 |
| 36.97 | 2531.11 |
| 36.98 | 2271.06 |
| 36.99 | 2513.77 |
| 37    | 2427.09 |
| 37.01 | 2375.08 |
| 37.02 | 2687.14 |
| 37.03 | 2375.08 |
| 37.04 | 2652.46 |
| 37.05 | 2531.11 |
| 37.06 | 2652.46 |
| 37.07 | 2669.8  |
| 37.08 | 2375.08 |
| 37.09 | 2773.82 |
| 37.1  | 2877.84 |
| 37.11 | 2565.78 |
| 37.12 | 2652.46 |
| 37.13 | 2617.79 |
| 37.14 | 2253.73 |
| 37.15 | 2496.44 |
| 37.16 | 2739.15 |
| 37.17 | 2479.1  |
| 37.18 | 2427.09 |
| 37.19 | 2461.76 |
| 37.2  | 2756.48 |
| 37.21 | 2479.1  |
| 37.22 | 2565.78 |
| 37.23 | 2704.47 |
| 37.24 | 2409.76 |
| 37.25 | 2635.13 |

|       |         |
|-------|---------|
| 37.26 | 2808.49 |
| 37.27 | 2600.46 |
| 37.28 | 2496.44 |
| 37.29 | 2461.76 |
| 37.3  | 2461.76 |
| 37.31 | 1993.68 |
| 37.32 | 2479.1  |
| 37.33 | 2825.83 |
| 37.34 | 2149.71 |
| 37.35 | 2357.75 |
| 37.36 | 2392.42 |
| 37.37 | 2600.46 |
| 37.38 | 2149.71 |
| 37.39 | 2652.46 |
| 37.4  | 2548.45 |
| 37.41 | 2773.82 |
| 37.42 | 2583.12 |
| 37.43 | 2496.44 |
| 37.44 | 2756.48 |
| 37.45 | 2825.83 |
| 37.46 | 2479.1  |
| 37.47 | 2704.47 |
| 37.48 | 2531.11 |
| 37.49 | 2548.45 |
| 37.5  | 2375.08 |
| 37.51 | 2687.14 |
| 37.52 | 2756.48 |
| 37.53 | 2409.76 |
| 37.54 | 2479.1  |
| 37.55 | 2444.43 |
| 37.56 | 2392.42 |
| 37.57 | 2635.13 |
| 37.58 | 2739.15 |
| 37.59 | 2375.08 |
| 37.6  | 2461.76 |
| 37.61 | 2531.11 |
| 37.62 | 2392.42 |
| 37.63 | 1993.68 |
| 37.64 | 2583.12 |
| 37.65 | 2409.76 |
| 37.66 | 2808.49 |
| 37.67 | 2600.46 |
| 37.68 | 2635.13 |
| 37.69 | 2409.76 |



|       |         |
|-------|---------|
| 37.7  | 2791.16 |
| 37.71 | 2375.08 |
| 37.72 | 2860.5  |
| 37.73 | 2184.38 |
| 37.74 | 2739.15 |
| 37.75 | 2583.12 |
| 37.76 | 2635.13 |
| 37.77 | 2617.79 |
| 37.78 | 2513.77 |
| 37.79 | 2877.84 |
| 37.8  | 2479.1  |
| 37.81 | 2305.74 |
| 37.82 | 2600.46 |
| 37.83 | 2756.48 |
| 37.84 | 2687.14 |
| 37.85 | 2635.13 |
| 37.86 | 2843.16 |
| 37.87 | 2739.15 |
| 37.88 | 2184.38 |
| 37.89 | 2669.8  |
| 37.9  | 2600.46 |
| 37.91 | 2461.76 |
| 37.92 | 2323.07 |
| 37.93 | 2652.46 |
| 37.94 | 2409.76 |
| 37.95 | 2427.09 |
| 37.96 | 2652.46 |
| 37.97 | 2548.45 |
| 37.98 | 2479.1  |
| 37.99 | 2340.41 |
| 38    | 2375.08 |
| 38.01 | 2409.76 |
| 38.02 | 2583.12 |
| 38.03 | 2080.36 |
| 38.04 | 2496.44 |
| 38.05 | 2444.43 |
| 38.06 | 2531.11 |
| 38.07 | 2253.73 |
| 38.08 | 2461.76 |
| 38.09 | 2461.76 |
| 38.1  | 2253.73 |
| 38.11 | 2392.42 |
| 38.12 | 2513.77 |
| 38.13 | 2357.75 |

|       |         |
|-------|---------|
| 38.14 | 2548.45 |
| 38.15 | 2392.42 |
| 38.16 | 2305.74 |
| 38.17 | 2548.45 |
| 38.18 | 2028.36 |
| 38.19 | 2687.14 |
| 38.2  | 2496.44 |
| 38.21 | 2548.45 |
| 38.22 | 2461.76 |
| 38.23 | 2392.42 |
| 38.24 | 2843.16 |
| 38.25 | 2617.79 |
| 38.26 | 2305.74 |
| 38.27 | 2219.06 |
| 38.28 | 2357.75 |
| 38.29 | 2409.76 |
| 38.3  | 2479.1  |
| 38.31 | 2531.11 |
| 38.32 | 2565.78 |
| 38.33 | 2288.4  |
| 38.34 | 2461.76 |
| 38.35 | 2427.09 |
| 38.36 | 2236.39 |
| 38.37 | 2305.74 |
| 38.38 | 2652.46 |
| 38.39 | 2565.78 |
| 38.4  | 2548.45 |
| 38.41 | 2721.81 |
| 38.42 | 2375.08 |
| 38.43 | 2340.41 |
| 38.44 | 2565.78 |
| 38.45 | 2635.13 |
| 38.46 | 2444.43 |
| 38.47 | 2496.44 |
| 38.48 | 2288.4  |
| 38.49 | 2063.03 |
| 38.5  | 2687.14 |
| 38.51 | 2860.5  |
| 38.52 | 2947.18 |
| 38.53 | 2669.8  |
| 38.54 | 2756.48 |
| 38.55 | 2288.4  |
| 38.56 | 2496.44 |
| 38.57 | 2444.43 |

|       |         |
|-------|---------|
| 38.58 | 2496.44 |
| 38.59 | 2721.81 |
| 38.6  | 2271.06 |
| 38.61 | 2531.11 |
| 38.62 | 2600.46 |
| 38.63 | 2305.74 |
| 38.64 | 2548.45 |
| 38.65 | 2912.51 |
| 38.66 | 2652.46 |
| 38.67 | 2687.14 |
| 38.68 | 2652.46 |
| 38.69 | 2496.44 |
| 38.7  | 2513.77 |
| 38.71 | 2756.48 |
| 38.72 | 2687.14 |
| 38.73 | 2444.43 |
| 38.74 | 2756.48 |
| 38.75 | 2635.13 |
| 38.76 | 2375.08 |
| 38.77 | 2860.5  |
| 38.78 | 2739.15 |
| 38.79 | 2704.47 |
| 38.8  | 2808.49 |
| 38.81 | 2773.82 |
| 38.82 | 2999.19 |
| 38.83 | 2791.16 |
| 38.84 | 2652.46 |
| 38.85 | 2912.51 |
| 38.86 | 3155.22 |
| 38.87 | 2687.14 |
| 38.88 | 3172.56 |
| 38.89 | 2669.8  |
| 38.9  | 3241.9  |
| 38.91 | 2877.84 |
| 38.92 | 2756.48 |
| 38.93 | 3016.53 |
| 38.94 | 2912.51 |
| 38.95 | 2773.82 |
| 38.96 | 2895.17 |
| 38.97 | 3449.94 |
| 38.98 | 2652.46 |
| 38.99 | 2877.84 |
| 39    | 2860.5  |
| 39.01 | 3016.53 |

|       |         |
|-------|---------|
| 39.02 | 2947.18 |
| 39.03 | 3051.2  |
| 39.04 | 3016.53 |
| 39.05 | 2999.19 |
| 39.06 | 2791.16 |
| 39.07 | 2565.78 |
| 39.08 | 2825.83 |
| 39.09 | 2877.84 |
| 39.1  | 2825.83 |
| 39.11 | 3380.59 |
| 39.12 | 3033.86 |
| 39.13 | 3224.56 |
| 39.14 | 2721.81 |
| 39.15 | 2964.52 |
| 39.16 | 3415.26 |
| 39.17 | 3657.97 |
| 39.18 | 3640.64 |
| 39.19 | 3709.98 |
| 39.2  | 3311.25 |
| 39.21 | 3709.98 |
| 39.22 | 3883.35 |
| 39.23 | 3692.65 |
| 39.24 | 3727.32 |
| 39.25 | 4282.08 |
| 39.26 | 4212.74 |
| 39.27 | 4368.77 |
| 39.28 | 4715.49 |
| 39.29 | 4732.83 |
| 39.3  | 5270.26 |
| 39.31 | 5773.01 |
| 39.32 | 5755.67 |
| 39.33 | 5911.7  |
| 39.34 | 5773.01 |
| 39.35 | 6050.39 |
| 39.36 | 6501.14 |
| 39.37 | 7402.63 |
| 39.38 | 7940.06 |
| 39.39 | 8494.82 |
| 39.4  | 8200.1  |
| 39.41 | 9378.98 |
| 39.42 | 9691.03 |
| 39.43 | 10904.6 |
| 39.44 | 12239.5 |
| 39.45 | 11372.7 |

|       |         |
|-------|---------|
| 39.46 | 12222.1 |
| 39.47 | 13193   |
| 39.48 | 14735.9 |
| 39.49 | 16816.3 |
| 39.5  | 16677.6 |
| 39.51 | 17943.1 |
| 39.52 | 19728.8 |
| 39.53 | 21219.7 |
| 39.54 | 20630.3 |
| 39.55 | 22710.6 |
| 39.56 | 23213.4 |
| 39.57 | 22519.9 |
| 39.58 | 21653.1 |
| 39.59 | 20803.6 |
| 39.6  | 20300.9 |
| 39.61 | 19815.5 |
| 39.62 | 18810   |
| 39.63 | 18099.2 |
| 39.64 | 18029.8 |
| 39.65 | 17249.7 |
| 39.66 | 16590.9 |
| 39.67 | 16157.5 |
| 39.68 | 14337.2 |
| 39.69 | 14042.5 |
| 39.7  | 12499.5 |
| 39.71 | 11130   |
| 39.72 | 10904.6 |
| 39.73 | 10488.5 |
| 39.74 | 10193.8 |
| 39.75 | 8633.51 |
| 39.76 | 8044.08 |
| 39.77 | 7610.67 |
| 39.78 | 6865.2  |
| 39.79 | 6657.17 |
| 39.8  | 6431.79 |
| 39.81 | 5998.38 |
| 39.82 | 5946.38 |
| 39.83 | 5322.27 |
| 39.84 | 5408.95 |
| 39.85 | 5304.93 |
| 39.86 | 5252.92 |
| 39.87 | 4888.86 |
| 39.88 | 4576.8  |
| 39.89 | 4455.45 |

|       |         |
|-------|---------|
| 39.9  | 4264.75 |
| 39.91 | 4316.76 |
| 39.92 | 3970.03 |
| 39.93 | 3744.66 |
| 39.94 | 4230.07 |
| 39.95 | 3970.03 |
| 39.96 | 3744.66 |
| 39.97 | 4455.45 |
| 39.98 | 4091.38 |
| 39.99 | 4143.39 |
| 40    | 3588.63 |
| 40.01 | 3328.58 |
| 40.02 | 3328.58 |
| 40.03 | 3553.96 |
| 40.04 | 3293.91 |
| 40.05 | 3137.88 |
| 40.06 | 3224.56 |
| 40.07 | 3397.93 |
| 40.08 | 3103.21 |
| 40.09 | 3033.86 |
| 40.1  | 2999.19 |
| 40.11 | 3085.87 |
| 40.12 | 3120.55 |
| 40.13 | 3241.9  |
| 40.14 | 3051.2  |
| 40.15 | 2947.18 |
| 40.16 | 2635.13 |
| 40.17 | 3016.53 |
| 40.18 | 2929.85 |
| 40.19 | 2652.46 |
| 40.2  | 2704.47 |
| 40.21 | 2721.81 |
| 40.22 | 2912.51 |
| 40.23 | 2513.77 |
| 40.24 | 2721.81 |
| 40.25 | 2791.16 |
| 40.26 | 2565.78 |
| 40.27 | 2773.82 |
| 40.28 | 2496.44 |
| 40.29 | 2375.08 |
| 40.3  | 2323.07 |
| 40.31 | 2583.12 |
| 40.32 | 2669.8  |
| 40.33 | 2825.83 |

|       |         |
|-------|---------|
| 40.34 | 2652.46 |
| 40.35 | 2583.12 |
| 40.36 | 2149.71 |
| 40.37 | 2652.46 |
| 40.38 | 2375.08 |
| 40.39 | 2132.37 |
| 40.4  | 2253.73 |
| 40.41 | 2617.79 |
| 40.42 | 2340.41 |
| 40.43 | 2392.42 |
| 40.44 | 2721.81 |
| 40.45 | 2756.48 |
| 40.46 | 2444.43 |
| 40.47 | 2583.12 |
| 40.48 | 2756.48 |
| 40.49 | 2496.44 |
| 40.5  | 2392.42 |
| 40.51 | 2721.81 |
| 40.52 | 2704.47 |
| 40.53 | 2600.46 |
| 40.54 | 2669.8  |
| 40.55 | 2895.17 |
| 40.56 | 2635.13 |
| 40.57 | 2565.78 |
| 40.58 | 2548.45 |
| 40.59 | 2305.74 |
| 40.6  | 2565.78 |
| 40.61 | 2375.08 |
| 40.62 | 2548.45 |
| 40.63 | 2843.16 |
| 40.64 | 2323.07 |
| 40.65 | 2323.07 |
| 40.66 | 2444.43 |
| 40.67 | 2531.11 |
| 40.68 | 2669.8  |
| 40.69 | 2583.12 |
| 40.7  | 2635.13 |
| 40.71 | 2444.43 |
| 40.72 | 2444.43 |
| 40.73 | 2323.07 |
| 40.74 | 2548.45 |
| 40.75 | 2427.09 |
| 40.76 | 2496.44 |
| 40.77 | 2219.06 |

|       |         |
|-------|---------|
| 40.78 | 2011.02 |
| 40.79 | 2479.1  |
| 40.8  | 2791.16 |
| 40.81 | 2375.08 |
| 40.82 | 2496.44 |
| 40.83 | 2791.16 |
| 40.84 | 2635.13 |
| 40.85 | 2167.05 |
| 40.86 | 2669.8  |
| 40.87 | 2184.38 |
| 40.88 | 2063.03 |
| 40.89 | 2357.75 |
| 40.9  | 2444.43 |
| 40.91 | 2860.5  |
| 40.92 | 2236.39 |
| 40.93 | 2288.4  |
| 40.94 | 2479.1  |
| 40.95 | 2115.04 |
| 40.96 | 2149.71 |
| 40.97 | 2132.37 |
| 40.98 | 2375.08 |
| 40.99 | 2305.74 |
| 41    | 2201.72 |
| 41.01 | 2479.1  |
| 41.02 | 2305.74 |
| 41.03 | 2271.06 |
| 41.04 | 2149.71 |
| 41.05 | 2375.08 |
| 41.06 | 2305.74 |
| 41.07 | 2565.78 |
| 41.08 | 2409.76 |
| 41.09 | 2669.8  |
| 41.1  | 2409.76 |
| 41.11 | 2635.13 |
| 41.12 | 2773.82 |
| 41.13 | 2427.09 |
| 41.14 | 2444.43 |
| 41.15 | 2669.8  |
| 41.16 | 2375.08 |
| 41.17 | 2323.07 |
| 41.18 | 2427.09 |
| 41.19 | 2600.46 |
| 41.2  | 2791.16 |
| 41.21 | 2652.46 |



|       |         |
|-------|---------|
| 41.22 | 2739.15 |
| 41.23 | 2496.44 |
| 41.24 | 2617.79 |
| 41.25 | 2652.46 |
| 41.26 | 2739.15 |
| 41.27 | 2756.48 |
| 41.28 | 3016.53 |
| 41.29 | 2964.52 |
| 41.3  | 2895.17 |
| 41.31 | 2617.79 |
| 41.32 | 2427.09 |
| 41.33 | 2739.15 |
| 41.34 | 2825.83 |
| 41.35 | 3051.2  |
| 41.36 | 2860.5  |
| 41.37 | 2999.19 |
| 41.38 | 2964.52 |
| 41.39 | 3068.54 |
| 41.4  | 2964.52 |
| 41.41 | 3120.55 |
| 41.42 | 3432.6  |
| 41.43 | 2981.86 |
| 41.44 | 2947.18 |
| 41.45 | 2669.8  |
| 41.46 | 2548.45 |
| 41.47 | 2583.12 |
| 41.48 | 2860.5  |
| 41.49 | 2947.18 |
| 41.5  | 2929.85 |
| 41.51 | 2340.41 |
| 41.52 | 2617.79 |
| 41.53 | 2565.78 |
| 41.54 | 2392.42 |
| 41.55 | 2739.15 |
| 41.56 | 2375.08 |
| 41.57 | 2375.08 |
| 41.58 | 2583.12 |
| 41.59 | 2271.06 |
| 41.6  | 2600.46 |
| 41.61 | 2496.44 |
| 41.62 | 2756.48 |
| 41.63 | 2479.1  |
| 41.64 | 2323.07 |
| 41.65 | 2340.41 |

|       |         |
|-------|---------|
| 41.66 | 2548.45 |
| 41.67 | 2704.47 |
| 41.68 | 2409.76 |
| 41.69 | 2219.06 |
| 41.7  | 2357.75 |
| 41.71 | 2479.1  |
| 41.72 | 2375.08 |
| 41.73 | 2791.16 |
| 41.74 | 2600.46 |
| 41.75 | 2236.39 |
| 41.76 | 2461.76 |
| 41.77 | 2635.13 |
| 41.78 | 2617.79 |
| 41.79 | 2513.77 |
| 41.8  | 2617.79 |
| 41.81 | 2427.09 |
| 41.82 | 2531.11 |
| 41.83 | 2600.46 |
| 41.84 | 2461.76 |
| 41.85 | 2513.77 |
| 41.86 | 2687.14 |
| 41.87 | 2375.08 |
| 41.88 | 2444.43 |
| 41.89 | 2375.08 |
| 41.9  | 2531.11 |
| 41.91 | 2531.11 |
| 41.92 | 2167.05 |
| 41.93 | 2687.14 |
| 41.94 | 2357.75 |
| 41.95 | 2444.43 |
| 41.96 | 2340.41 |
| 41.97 | 2513.77 |
| 41.98 | 2392.42 |
| 41.99 | 2461.76 |
| 42    | 2323.07 |
| 42.01 | 2184.38 |
| 42.02 | 2739.15 |
| 42.03 | 2392.42 |
| 42.04 | 2531.11 |
| 42.05 | 2600.46 |
| 42.06 | 2305.74 |
| 42.07 | 2357.75 |
| 42.08 | 2652.46 |
| 42.09 | 2773.82 |

|       |         |
|-------|---------|
| 42.1  | 2409.76 |
| 42.11 | 2409.76 |
| 42.12 | 2635.13 |
| 42.13 | 2340.41 |
| 42.14 | 2461.76 |
| 42.15 | 2253.73 |
| 42.16 | 2305.74 |
| 42.17 | 2791.16 |
| 42.18 | 2444.43 |
| 42.19 | 2305.74 |
| 42.2  | 2461.76 |
| 42.21 | 2444.43 |
| 42.22 | 2704.47 |
| 42.23 | 2565.78 |
| 42.24 | 2219.06 |
| 42.25 | 2305.74 |
| 42.26 | 2669.8  |
| 42.27 | 2409.76 |
| 42.28 | 2773.82 |
| 42.29 | 2617.79 |
| 42.3  | 2808.49 |
| 42.31 | 2773.82 |
| 42.32 | 3120.55 |
| 42.33 | 2756.48 |
| 42.34 | 2340.41 |
| 42.35 | 2531.11 |
| 42.36 | 2739.15 |
| 42.37 | 2184.38 |
| 42.38 | 2340.41 |
| 42.39 | 2652.46 |
| 42.4  | 2565.78 |
| 42.41 | 2600.46 |
| 42.42 | 2513.77 |
| 42.43 | 2444.43 |
| 42.44 | 2323.07 |
| 42.45 | 2201.72 |
| 42.46 | 2427.09 |
| 42.47 | 2617.79 |
| 42.48 | 2375.08 |
| 42.49 | 2479.1  |
| 42.5  | 2548.45 |
| 42.51 | 2357.75 |
| 42.52 | 2583.12 |
| 42.53 | 2669.8  |

|       |         |
|-------|---------|
| 42.54 | 2600.46 |
| 42.55 | 2357.75 |
| 42.56 | 2635.13 |
| 42.57 | 2583.12 |
| 42.58 | 2271.06 |
| 42.59 | 2756.48 |
| 42.6  | 2548.45 |
| 42.61 | 2271.06 |
| 42.62 | 2323.07 |
| 42.63 | 2617.79 |
| 42.64 | 2756.48 |
| 42.65 | 2496.44 |
| 42.66 | 2288.4  |
| 42.67 | 2548.45 |
| 42.68 | 2860.5  |
| 42.69 | 3103.21 |
| 42.7  | 2808.49 |
| 42.71 | 3103.21 |
| 42.72 | 2791.16 |
| 42.73 | 2427.09 |
| 42.74 | 3068.54 |
| 42.75 | 2843.16 |
| 42.76 | 2409.76 |
| 42.77 | 2999.19 |
| 42.78 | 2860.5  |
| 42.79 | 2981.86 |
| 42.8  | 2929.85 |
| 42.81 | 2825.83 |
| 42.82 | 2964.52 |
| 42.83 | 3172.56 |
| 42.84 | 2791.16 |
| 42.85 | 3155.22 |
| 42.86 | 3172.56 |
| 42.87 | 2843.16 |
| 42.88 | 2687.14 |
| 42.89 | 2981.86 |
| 42.9  | 3224.56 |
| 42.91 | 3311.25 |
| 42.92 | 3224.56 |
| 42.93 | 3033.86 |
| 42.94 | 3189.89 |
| 42.95 | 3588.63 |
| 42.96 | 3224.56 |
| 42.97 | 3189.89 |

|       |         |
|-------|---------|
| 42.98 | 3657.97 |
| 42.99 | 3727.32 |
| 43    | 3866.01 |
| 43.01 | 3605.97 |
| 43.02 | 4178.07 |
| 43.03 | 3987.37 |
| 43.04 | 4212.74 |
| 43.05 | 4490.12 |
| 43.06 | 5044.88 |
| 43.07 | 4767.5  |
| 43.08 | 4819.51 |
| 43.09 | 5512.97 |
| 43.1  | 5721    |
| 43.11 | 5773.01 |
| 43.12 | 6483.8  |
| 43.13 | 6345.11 |
| 43.14 | 6570.48 |
| 43.15 | 7419.97 |
| 43.16 | 8044.08 |
| 43.17 | 8928.23 |
| 43.18 | 8685.52 |
| 43.19 | 9326.97 |
| 43.2  | 9188.28 |
| 43.21 | 10800.6 |
| 43.22 | 11806.1 |
| 43.23 | 11823.4 |
| 43.24 | 13019.6 |
| 43.25 | 14614.6 |
| 43.26 | 16018.8 |
| 43.27 | 16677.6 |
| 43.28 | 17891.1 |
| 43.29 | 18151.2 |
| 43.3  | 19156.7 |
| 43.31 | 18914   |
| 43.32 | 19364.7 |
| 43.33 | 20006.2 |
| 43.34 | 19312.7 |
| 43.35 | 17388.4 |
| 43.36 | 16764.3 |
| 43.37 | 15932.1 |
| 43.38 | 14944   |
| 43.39 | 15672.1 |
| 43.4  | 14701.2 |
| 43.41 | 15412   |

|       |         |
|-------|---------|
| 43.42 | 14077.1 |
| 43.43 | 14129.1 |
| 43.44 | 12638.2 |
| 43.45 | 12014.1 |
| 43.46 | 10471.2 |
| 43.47 | 10193.8 |
| 43.48 | 9205.61 |
| 43.49 | 8893.56 |
| 43.5  | 8096.08 |
| 43.51 | 7073.24 |
| 43.52 | 7367.96 |
| 43.53 | 6830.53 |
| 43.54 | 6171.75 |
| 43.55 | 6015.72 |
| 43.56 | 5010.21 |
| 43.57 | 5235.58 |
| 43.58 | 5235.58 |
| 43.59 | 5079.56 |
| 43.6  | 4646.15 |
| 43.61 | 4507.46 |
| 43.62 | 4680.82 |
| 43.63 | 4559.47 |
| 43.64 | 4264.75 |
| 43.65 | 3779.33 |
| 43.66 | 3484.61 |
| 43.67 | 3709.98 |
| 43.68 | 3779.33 |
| 43.69 | 3831.34 |
| 43.7  | 3259.24 |
| 43.71 | 3640.64 |
| 43.72 | 3536.62 |
| 43.73 | 3207.23 |
| 43.74 | 3449.94 |
| 43.75 | 3553.96 |
| 43.76 | 3085.87 |
| 43.77 | 3276.57 |
| 43.78 | 3259.24 |
| 43.79 | 2895.17 |
| 43.8  | 3363.26 |
| 43.81 | 3415.26 |
| 43.82 | 2877.84 |
| 43.83 | 2721.81 |
| 43.84 | 2808.49 |
| 43.85 | 2565.78 |

|       |         |
|-------|---------|
| 43.86 | 2947.18 |
| 43.87 | 3068.54 |
| 43.88 | 2773.82 |
| 43.89 | 3120.55 |
| 43.9  | 2600.46 |
| 43.91 | 2964.52 |
| 43.92 | 2773.82 |
| 43.93 | 2600.46 |
| 43.94 | 2635.13 |
| 43.95 | 2860.5  |
| 43.96 | 2999.19 |
| 43.97 | 2739.15 |
| 43.98 | 2565.78 |
| 43.99 | 2583.12 |
| 44    | 2721.81 |
| 44.01 | 2895.17 |
| 44.02 | 2791.16 |
| 44.03 | 2444.43 |
| 44.04 | 2444.43 |
| 44.05 | 2479.1  |
| 44.06 | 2600.46 |
| 44.07 | 2496.44 |
| 44.08 | 2253.73 |
| 44.09 | 2687.14 |
| 44.1  | 2617.79 |
| 44.11 | 2479.1  |
| 44.12 | 2323.07 |
| 44.13 | 2427.09 |
| 44.14 | 2600.46 |
| 44.15 | 2600.46 |
| 44.16 | 2548.45 |
| 44.17 | 2375.08 |
| 44.18 | 2773.82 |
| 44.19 | 2323.07 |
| 44.2  | 2739.15 |
| 44.21 | 2236.39 |
| 44.22 | 2167.05 |
| 44.23 | 2409.76 |
| 44.24 | 2201.72 |
| 44.25 | 2825.83 |
| 44.26 | 2340.41 |
| 44.27 | 2600.46 |
| 44.28 | 2392.42 |
| 44.29 | 2531.11 |

|       |         |
|-------|---------|
| 44.3  | 2531.11 |
| 44.31 | 2305.74 |
| 44.32 | 2357.75 |
| 44.33 | 2427.09 |
| 44.34 | 2565.78 |
| 44.35 | 2340.41 |
| 44.36 | 2236.39 |
| 44.37 | 2323.07 |
| 44.38 | 2392.42 |
| 44.39 | 2427.09 |
| 44.4  | 2323.07 |
| 44.41 | 2357.75 |
| 44.42 | 2236.39 |
| 44.43 | 2323.07 |
| 44.44 | 2427.09 |
| 44.45 | 2340.41 |
| 44.46 | 2461.76 |
| 44.47 | 2479.1  |
| 44.48 | 2444.43 |
| 44.49 | 2548.45 |
| 44.5  | 2531.11 |
| 44.51 | 2392.42 |
| 44.52 | 2271.06 |
| 44.53 | 2756.48 |
| 44.54 | 2513.77 |
| 44.55 | 2583.12 |
| 44.56 | 2461.76 |
| 44.57 | 2340.41 |
| 44.58 | 2236.39 |
| 44.59 | 2340.41 |
| 44.6  | 2513.77 |
| 44.61 | 2357.75 |
| 44.62 | 2236.39 |
| 44.63 | 2600.46 |
| 44.64 | 2305.74 |
| 44.65 | 2773.82 |
| 44.66 | 2635.13 |
| 44.67 | 2271.06 |
| 44.68 | 2149.71 |
| 44.69 | 2409.76 |
| 44.7  | 2392.42 |
| 44.71 | 2288.4  |
| 44.72 | 2479.1  |
| 44.73 | 2513.77 |



|       |         |
|-------|---------|
| 44.74 | 2253.73 |
| 44.75 | 2097.7  |
| 44.76 | 2409.76 |
| 44.77 | 2444.43 |
| 44.78 | 2669.8  |
| 44.79 | 2184.38 |
| 44.8  | 2080.36 |
| 44.81 | 2392.42 |
| 44.82 | 2409.76 |
| 44.83 | 2271.06 |
| 44.84 | 2531.11 |
| 44.85 | 2271.06 |
| 44.86 | 2028.36 |
| 44.87 | 2253.73 |
| 44.88 | 2392.42 |
| 44.89 | 2375.08 |
| 44.9  | 2115.04 |
| 44.91 | 2392.42 |
| 44.92 | 2253.73 |
| 44.93 | 2409.76 |
| 44.94 | 2201.72 |
| 44.95 | 2288.4  |
| 44.96 | 2409.76 |
| 44.97 | 2427.09 |
| 44.98 | 2461.76 |
| 44.99 | 2479.1  |
| 45    | 2132.37 |
| 45.01 | 2357.75 |
| 45.02 | 2531.11 |
| 45.03 | 2288.4  |
| 45.04 | 2461.76 |
| 45.05 | 2635.13 |
| 45.06 | 2652.46 |
| 45.07 | 2600.46 |
| 45.08 | 2444.43 |
| 45.09 | 2721.81 |
| 45.1  | 2132.37 |
| 45.11 | 2565.78 |
| 45.12 | 2115.04 |
| 45.13 | 2479.1  |
| 45.14 | 2375.08 |
| 45.15 | 2253.73 |
| 45.16 | 2479.1  |
| 45.17 | 2583.12 |

|       |         |
|-------|---------|
| 45.18 | 2340.41 |
| 45.19 | 2253.73 |
| 45.2  | 2461.76 |
| 45.21 | 2669.8  |
| 45.22 | 2669.8  |
| 45.23 | 2461.76 |
| 45.24 | 2427.09 |
| 45.25 | 2357.75 |
| 45.26 | 2635.13 |
| 45.27 | 2531.11 |
| 45.28 | 2479.1  |
| 45.29 | 2635.13 |
| 45.3  | 2479.1  |
| 45.31 | 2912.51 |
| 45.32 | 2496.44 |
| 45.33 | 2340.41 |
| 45.34 | 2583.12 |
| 45.35 | 2583.12 |
| 45.36 | 2964.52 |
| 45.37 | 2409.76 |
| 45.38 | 2860.5  |
| 45.39 | 2669.8  |
| 45.4  | 2600.46 |
| 45.41 | 2513.77 |
| 45.42 | 2617.79 |
| 45.43 | 2704.47 |
| 45.44 | 2652.46 |
| 45.45 | 2565.78 |
| 45.46 | 2947.18 |
| 45.47 | 2461.76 |
| 45.48 | 2028.36 |
| 45.49 | 2444.43 |
| 45.5  | 2427.09 |
| 45.51 | 2167.05 |
| 45.52 | 2479.1  |
| 45.53 | 2409.76 |
| 45.54 | 2323.07 |
| 45.55 | 2201.72 |
| 45.56 | 2548.45 |
| 45.57 | 2184.38 |
| 45.58 | 2184.38 |
| 45.59 | 2271.06 |
| 45.6  | 2427.09 |
| 45.61 | 2340.41 |

|       |         |
|-------|---------|
| 45.62 | 2288.4  |
| 45.63 | 2236.39 |
| 45.64 | 2357.75 |
| 45.65 | 1924.34 |
| 45.66 | 2375.08 |
| 45.67 | 2219.06 |
| 45.68 | 2063.03 |
| 45.69 | 2063.03 |
| 45.7  | 2132.37 |
| 45.71 | 2513.77 |
| 45.72 | 2583.12 |
| 45.73 | 2357.75 |
| 45.74 | 2375.08 |
| 45.75 | 2184.38 |
| 45.76 | 2427.09 |
| 45.77 | 2236.39 |
| 45.78 | 2236.39 |
| 45.79 | 2531.11 |
| 45.8  | 2184.38 |
| 45.81 | 2253.73 |
| 45.82 | 2409.76 |
| 45.83 | 2253.73 |
| 45.84 | 2323.07 |
| 45.85 | 2236.39 |
| 45.86 | 2271.06 |
| 45.87 | 2409.76 |
| 45.88 | 2461.76 |
| 45.89 | 2617.79 |
| 45.9  | 2444.43 |
| 45.91 | 2427.09 |
| 45.92 | 2461.76 |
| 45.93 | 2288.4  |
| 45.94 | 2132.37 |
| 45.95 | 2461.76 |
| 45.96 | 2271.06 |
| 45.97 | 2219.06 |
| 45.98 | 2409.76 |
| 45.99 | 2115.04 |
| 46    | 2201.72 |
| 46.01 | 2253.73 |
| 46.02 | 2461.76 |
| 46.03 | 2496.44 |
| 46.04 | 2323.07 |
| 46.05 | 2652.46 |

|       |         |
|-------|---------|
| 46.06 | 2461.76 |
| 46.07 | 2461.76 |
| 46.08 | 2461.76 |
| 46.09 | 2513.77 |
| 46.1  | 2288.4  |
| 46.11 | 2513.77 |
| 46.12 | 2323.07 |
| 46.13 | 2201.72 |
| 46.14 | 2288.4  |
| 46.15 | 2496.44 |
| 46.16 | 2427.09 |
| 46.17 | 2288.4  |
| 46.18 | 2271.06 |
| 46.19 | 2669.8  |
| 46.2  | 2409.76 |
| 46.21 | 2167.05 |
| 46.22 | 2583.12 |
| 46.23 | 2444.43 |
| 46.24 | 2427.09 |
| 46.25 | 2721.81 |
| 46.26 | 2600.46 |
| 46.27 | 2843.16 |
| 46.28 | 2687.14 |
| 46.29 | 2721.81 |
| 46.3  | 2201.72 |
| 46.31 | 2375.08 |
| 46.32 | 2271.06 |
| 46.33 | 2531.11 |
| 46.34 | 2548.45 |
| 46.35 | 2496.44 |
| 46.36 | 2791.16 |
| 46.37 | 2877.84 |
| 46.38 | 2531.11 |
| 46.39 | 2392.42 |
| 46.4  | 2687.14 |
| 46.41 | 2531.11 |
| 46.42 | 2721.81 |
| 46.43 | 2513.77 |
| 46.44 | 2617.79 |
| 46.45 | 2375.08 |
| 46.46 | 2409.76 |
| 46.47 | 2513.77 |
| 46.48 | 2375.08 |
| 46.49 | 2461.76 |

|       |         |
|-------|---------|
| 46.5  | 2583.12 |
| 46.51 | 2704.47 |
| 46.52 | 2496.44 |
| 46.53 | 2548.45 |
| 46.54 | 2548.45 |
| 46.55 | 2323.07 |
| 46.56 | 2721.81 |
| 46.57 | 2565.78 |
| 46.58 | 2565.78 |
| 46.59 | 2635.13 |
| 46.6  | 2600.46 |
| 46.61 | 2357.75 |
| 46.62 | 2496.44 |
| 46.63 | 2704.47 |
| 46.64 | 2496.44 |
| 46.65 | 2375.08 |
| 46.66 | 2513.77 |
| 46.67 | 2739.15 |
| 46.68 | 2721.81 |
| 46.69 | 2496.44 |
| 46.7  | 2825.83 |
| 46.71 | 2947.18 |
| 46.72 | 2877.84 |
| 46.73 | 2669.8  |
| 46.74 | 2756.48 |
| 46.75 | 2669.8  |
| 46.76 | 2825.83 |
| 46.77 | 2929.85 |
| 46.78 | 2565.78 |
| 46.79 | 2877.84 |
| 46.8  | 2773.82 |
| 46.81 | 2929.85 |
| 46.82 | 2981.86 |
| 46.83 | 2877.84 |
| 46.84 | 3224.56 |
| 46.85 | 2756.48 |
| 46.86 | 3207.23 |
| 46.87 | 3241.9  |
| 46.88 | 3241.9  |
| 46.89 | 2739.15 |
| 46.9  | 3345.92 |
| 46.91 | 3328.58 |
| 46.92 | 3623.3  |
| 46.93 | 3640.64 |

|       |         |
|-------|---------|
| 46.94 | 3501.95 |
| 46.95 | 3640.64 |
| 46.96 | 3293.91 |
| 46.97 | 3952.69 |
| 46.98 | 3345.92 |
| 46.99 | 3519.28 |
| 47    | 3605.97 |
| 47.01 | 4230.07 |
| 47.02 | 4368.77 |
| 47.03 | 3796.67 |
| 47.04 | 4039.37 |
| 47.05 | 4282.08 |
| 47.06 | 4368.77 |
| 47.07 | 4854.18 |
| 47.08 | 4628.81 |
| 47.09 | 4247.41 |
| 47.1  | 5200.91 |
| 47.11 | 5304.93 |
| 47.12 | 5547.64 |
| 47.13 | 6310.44 |
| 47.14 | 6015.72 |
| 47.15 | 6206.42 |
| 47.16 | 6414.46 |
| 47.17 | 6709.18 |
| 47.18 | 7090.58 |
| 47.19 | 8009.4  |
| 47.2  | 8165.43 |
| 47.21 | 8494.82 |
| 47.22 | 8286.79 |
| 47.23 | 8165.43 |
| 47.24 | 8928.23 |
| 47.25 | 8997.58 |
| 47.26 | 9587.01 |
| 47.27 | 9465.66 |
| 47.28 | 9916.4  |
| 47.29 | 10263.1 |
| 47.3  | 10315.1 |
| 47.31 | 9864.39 |
| 47.32 | 10020.4 |
| 47.33 | 9136.27 |
| 47.34 | 9309.63 |
| 47.35 | 9847.06 |
| 47.36 | 9829.72 |
| 47.37 | 10141.8 |

|       |         |
|-------|---------|
| 47.38 | 11216.6 |
| 47.39 | 10592.5 |
| 47.4  | 10557.8 |
| 47.41 | 11164.6 |
| 47.42 | 11216.6 |
| 47.43 | 11043.3 |
| 47.44 | 11234   |
| 47.45 | 11858.1 |
| 47.46 | 11511.3 |
| 47.47 | 11511.3 |
| 47.48 | 12863.6 |
| 47.49 | 13071.6 |
| 47.5  | 13799.8 |
| 47.51 | 14406.5 |
| 47.52 | 15793.4 |
| 47.53 | 15637.4 |
| 47.54 | 16261.5 |
| 47.55 | 17995.2 |
| 47.56 | 19070   |
| 47.57 | 19676.8 |
| 47.58 | 20318.2 |
| 47.59 | 22294.6 |
| 47.6  | 23750.8 |
| 47.61 | 23733.5 |
| 47.62 | 24392.3 |
| 47.63 | 25380.4 |
| 47.64 | 24600.3 |
| 47.65 | 23993.5 |
| 47.66 | 25103.1 |
| 47.67 | 25189.7 |
| 47.68 | 23456.1 |
| 47.69 | 22936   |
| 47.7  | 22294.6 |
| 47.71 | 20231.5 |
| 47.72 | 19798.1 |
| 47.73 | 19538.1 |
| 47.74 | 19191.4 |
| 47.75 | 18324.5 |
| 47.76 | 17336.4 |
| 47.77 | 17665.8 |
| 47.78 | 16417.5 |
| 47.79 | 16521.6 |
| 47.8  | 15342.7 |
| 47.81 | 14406.5 |

|       |         |
|-------|---------|
| 47.82 | 13435.7 |
| 47.83 | 12447.5 |
| 47.84 | 11563.4 |
| 47.85 | 11355.3 |
| 47.86 | 10488.5 |
| 47.87 | 9153.6  |
| 47.88 | 8980.24 |
| 47.89 | 8702.86 |
| 47.9  | 8182.77 |
| 47.91 | 8616.18 |
| 47.92 | 7888.05 |
| 47.93 | 7315.95 |
| 47.94 | 7402.63 |
| 47.95 | 7142.58 |
| 47.96 | 7159.92 |
| 47.97 | 6345.11 |
| 47.98 | 6379.78 |
| 47.99 | 6501.14 |
| 48    | 5582.31 |
| 48.01 | 5478.29 |
| 48.02 | 5512.97 |
| 48.03 | 4767.5  |
| 48.04 | 5062.22 |
| 48.05 | 5512.97 |
| 48.06 | 5304.93 |
| 48.07 | 5131.57 |
| 48.08 | 4784.84 |
| 48.09 | 4784.84 |
| 48.1  | 5044.88 |
| 48.11 | 4438.11 |
| 48.12 | 4195.4  |
| 48.13 | 4299.42 |
| 48.14 | 4212.74 |
| 48.15 | 4403.44 |
| 48.16 | 4247.41 |
| 48.17 | 4264.75 |
| 48.18 | 3900.68 |
| 48.19 | 4282.08 |
| 48.2  | 4559.47 |
| 48.21 | 4126.06 |
| 48.22 | 4091.38 |
| 48.23 | 3918.02 |
| 48.24 | 3970.03 |
| 48.25 | 4039.37 |



|       |         |
|-------|---------|
| 48.26 | 4628.81 |
| 48.27 | 4091.38 |
| 48.28 | 4299.42 |
| 48.29 | 4438.11 |
| 48.3  | 4351.43 |
| 48.31 | 4836.85 |
| 48.32 | 5027.55 |
| 48.33 | 5166.24 |
| 48.34 | 5304.93 |
| 48.35 | 5842.36 |
| 48.36 | 5755.67 |
| 48.37 | 5547.64 |
| 48.38 | 5790.35 |
| 48.39 | 6362.45 |
| 48.4  | 6102.4  |
| 48.41 | 6414.46 |
| 48.42 | 7211.93 |
| 48.43 | 7437.3  |
| 48.44 | 7402.63 |
| 48.45 | 8754.87 |
| 48.46 | 8356.13 |
| 48.47 | 9535    |
| 48.48 | 9604.35 |
| 48.49 | 11095.3 |
| 48.5  | 10904.6 |
| 48.51 | 11771.4 |
| 48.52 | 11927.4 |
| 48.53 | 13765.1 |
| 48.54 | 14839.9 |
| 48.55 | 15793.4 |
| 48.56 | 16209.5 |
| 48.57 | 17249.7 |
| 48.58 | 19070   |
| 48.59 | 19486.1 |
| 48.6  | 20196.9 |
| 48.61 | 21011.7 |
| 48.62 | 22849.3 |
| 48.63 | 23109.4 |
| 48.64 | 23282.7 |
| 48.65 | 24132.2 |
| 48.66 | 23698.8 |
| 48.67 | 23022.7 |
| 48.68 | 22710.6 |
| 48.69 | 21878.5 |

|       |         |
|-------|---------|
| 48.7  | 20873   |
| 48.71 | 20335.6 |
| 48.72 | 19746.1 |
| 48.73 | 19278   |
| 48.74 | 17873.8 |
| 48.75 | 17665.8 |
| 48.76 | 17197.7 |
| 48.77 | 17041.7 |
| 48.78 | 16244.2 |
| 48.79 | 15932.1 |
| 48.8  | 14493.2 |
| 48.81 | 14163.8 |
| 48.82 | 13314.3 |
| 48.83 | 12014.1 |
| 48.84 | 11095.3 |
| 48.85 | 10297.8 |
| 48.86 | 10471.2 |
| 48.87 | 9292.29 |
| 48.88 | 8269.45 |
| 48.89 | 8338.79 |
| 48.9  | 7940.06 |
| 48.91 | 7263.94 |
| 48.92 | 6847.87 |
| 48.93 | 7263.94 |
| 48.94 | 6397.12 |
| 48.95 | 5755.67 |
| 48.96 | 6102.4  |
| 48.97 | 5270.26 |
| 48.98 | 5252.92 |
| 48.99 | 5304.93 |
| 49    | 4854.18 |
| 49.01 | 4715.49 |
| 49.02 | 5131.57 |
| 49.03 | 4750.17 |
| 49.04 | 4680.82 |
| 49.05 | 4680.82 |
| 49.06 | 4559.47 |
| 49.07 | 4403.44 |
| 49.08 | 4160.73 |
| 49.09 | 3987.37 |
| 49.1  | 4160.73 |
| 49.11 | 4126.06 |
| 49.12 | 3761.99 |
| 49.13 | 3709.98 |

|       |         |
|-------|---------|
| 49.14 | 3345.92 |
| 49.15 | 3415.26 |
| 49.16 | 3640.64 |
| 49.17 | 3449.94 |
| 49.18 | 3657.97 |
| 49.19 | 3536.62 |
| 49.2  | 3259.24 |
| 49.21 | 3484.61 |
| 49.22 | 3207.23 |
| 49.23 | 2843.16 |
| 49.24 | 3293.91 |
| 49.25 | 3536.62 |
| 49.26 | 3033.86 |
| 49.27 | 2721.81 |
| 49.28 | 3051.2  |
| 49.29 | 3155.22 |
| 49.3  | 2635.13 |
| 49.31 | 2825.83 |
| 49.32 | 2877.84 |
| 49.33 | 2531.11 |
| 49.34 | 2687.14 |
| 49.35 | 2427.09 |
| 49.36 | 2652.46 |
| 49.37 | 2756.48 |
| 49.38 | 2617.79 |
| 49.39 | 2184.38 |
| 49.4  | 2704.47 |
| 49.41 | 2704.47 |
| 49.42 | 2375.08 |
| 49.43 | 2219.06 |
| 49.44 | 2669.8  |
| 49.45 | 2305.74 |
| 49.46 | 2791.16 |
| 49.47 | 2444.43 |
| 49.48 | 2496.44 |
| 49.49 | 2531.11 |
| 49.5  | 2271.06 |
| 49.51 | 2392.42 |
| 49.52 | 2167.05 |
| 49.53 | 2392.42 |
| 49.54 | 2479.1  |
| 49.55 | 2409.76 |
| 49.56 | 2600.46 |
| 49.57 | 2201.72 |

|       |         |
|-------|---------|
| 49.58 | 2791.16 |
| 49.59 | 2340.41 |
| 49.6  | 2600.46 |
| 49.61 | 2219.06 |
| 49.62 | 2184.38 |
| 49.63 | 2167.05 |
| 49.64 | 2028.36 |
| 49.65 | 2375.08 |
| 49.66 | 1820.32 |
| 49.67 | 1993.68 |
| 49.68 | 2392.42 |
| 49.69 | 2843.16 |
| 49.7  | 2357.75 |
| 49.71 | 2167.05 |
| 49.72 | 2201.72 |
| 49.73 | 2721.81 |
| 49.74 | 2340.41 |
| 49.75 | 2375.08 |
| 49.76 | 2288.4  |
| 49.77 | 2288.4  |
| 49.78 | 2531.11 |
| 49.79 | 2409.76 |
| 49.8  | 2323.07 |
| 49.81 | 2184.38 |
| 49.82 | 2305.74 |
| 49.83 | 2167.05 |
| 49.84 | 2115.04 |
| 49.85 | 2167.05 |
| 49.86 | 2253.73 |
| 49.87 | 2063.03 |
| 49.88 | 2045.69 |
| 49.89 | 2340.41 |
| 49.9  | 2149.71 |
| 49.91 | 1993.68 |
| 49.92 | 1854.99 |
| 49.93 | 2444.43 |
| 49.94 | 2271.06 |
| 49.95 | 1907    |
| 49.96 | 2011.02 |
| 49.97 | 1750.97 |
| 49.98 | 1959.01 |
| 49.99 | 2028.36 |
| 50    | 2184.38 |
| 50.01 | 2392.42 |

|       |         |
|-------|---------|
| 50.02 | 2687.14 |
| 50.03 | 2392.42 |
| 50.04 | 2149.71 |
| 50.05 | 2063.03 |
| 50.06 | 2167.05 |
| 50.07 | 2097.7  |
| 50.08 | 1924.34 |
| 50.09 | 1941.67 |
| 50.1  | 2011.02 |
| 50.11 | 1733.64 |
| 50.12 | 2167.05 |
| 50.13 | 2219.06 |
| 50.14 | 2427.09 |
| 50.15 | 2028.36 |
| 50.16 | 1872.33 |
| 50.17 | 1976.35 |
| 50.18 | 2253.73 |
| 50.19 | 1941.67 |
| 50.2  | 1889.66 |
| 50.21 | 2219.06 |
| 50.22 | 2219.06 |
| 50.23 | 1820.32 |
| 50.24 | 1924.34 |
| 50.25 | 1924.34 |
| 50.26 | 1907    |
| 50.27 | 1872.33 |
| 50.28 | 2219.06 |
| 50.29 | 2132.37 |
| 50.3  | 2063.03 |
| 50.31 | 1941.67 |
| 50.32 | 1872.33 |
| 50.33 | 2149.71 |
| 50.34 | 1993.68 |
| 50.35 | 2201.72 |
| 50.36 | 2011.02 |
| 50.37 | 1785.65 |
| 50.38 | 2132.37 |
| 50.39 | 2115.04 |
| 50.4  | 2305.74 |
| 50.41 | 1924.34 |
| 50.42 | 2305.74 |
| 50.43 | 1959.01 |
| 50.44 | 2149.71 |
| 50.45 | 2357.75 |

|       |         |
|-------|---------|
| 50.46 | 1837.66 |
| 50.47 | 2028.36 |
| 50.48 | 1907    |
| 50.49 | 1907    |
| 50.5  | 1889.66 |
| 50.51 | 2063.03 |
| 50.52 | 2063.03 |
| 50.53 | 2115.04 |
| 50.54 | 2184.38 |
| 50.55 | 2236.39 |
| 50.56 | 2045.69 |
| 50.57 | 2097.7  |
| 50.58 | 2201.72 |
| 50.59 | 1993.68 |
| 50.6  | 1889.66 |
| 50.61 | 1941.67 |
| 50.62 | 2167.05 |
| 50.63 | 1820.32 |
| 50.64 | 1837.66 |
| 50.65 | 1993.68 |
| 50.66 | 1802.98 |
| 50.67 | 2011.02 |
| 50.68 | 1872.33 |
| 50.69 | 1976.35 |
| 50.7  | 1907    |
| 50.71 | 2149.71 |
| 50.72 | 2253.73 |
| 50.73 | 2167.05 |
| 50.74 | 2080.36 |
| 50.75 | 2305.74 |
| 50.76 | 2149.71 |
| 50.77 | 2045.69 |
| 50.78 | 2167.05 |
| 50.79 | 1907    |
| 50.8  | 1976.35 |
| 50.81 | 2253.73 |
| 50.82 | 2288.4  |
| 50.83 | 2097.7  |
| 50.84 | 2236.39 |
| 50.85 | 2201.72 |
| 50.86 | 1733.64 |
| 50.87 | 2444.43 |
| 50.88 | 2323.07 |
| 50.89 | 2617.79 |

|       |         |
|-------|---------|
| 50.9  | 2773.82 |
| 50.91 | 2496.44 |
| 50.92 | 2132.37 |
| 50.93 | 2201.72 |
| 50.94 | 2028.36 |
| 50.95 | 2392.42 |
| 50.96 | 2548.45 |
| 50.97 | 2652.46 |
| 50.98 | 2565.78 |
| 50.99 | 2149.71 |
| 51    | 2063.03 |
| 51.01 | 2184.38 |
| 51.02 | 2167.05 |
| 51.03 | 2271.06 |
| 51.04 | 2271.06 |
| 51.05 | 1924.34 |
| 51.06 | 2323.07 |
| 51.07 | 2271.06 |
| 51.08 | 2375.08 |
| 51.09 | 2184.38 |
| 51.1  | 2375.08 |
| 51.11 | 2323.07 |
| 51.12 | 2045.69 |
| 51.13 | 2063.03 |
| 51.14 | 2080.36 |
| 51.15 | 1976.35 |
| 51.16 | 1768.31 |
| 51.17 | 1854.99 |
| 51.18 | 1837.66 |
| 51.19 | 2063.03 |
| 51.2  | 2011.02 |
| 51.21 | 1681.63 |
| 51.22 | 1941.67 |
| 51.23 | 2028.36 |
| 51.24 | 2011.02 |
| 51.25 | 2011.02 |
| 51.26 | 1976.35 |
| 51.27 | 1993.68 |
| 51.28 | 1785.65 |
| 51.29 | 2011.02 |
| 51.3  | 1976.35 |
| 51.31 | 2063.03 |
| 51.32 | 2063.03 |
| 51.33 | 2011.02 |

|       |         |
|-------|---------|
| 51.34 | 2184.38 |
| 51.35 | 2028.36 |
| 51.36 | 2063.03 |
| 51.37 | 2149.71 |
| 51.38 | 2132.37 |
| 51.39 | 1941.67 |
| 51.4  | 2236.39 |
| 51.41 | 2097.7  |
| 51.42 | 1889.66 |
| 51.43 | 1854.99 |
| 51.44 | 2097.7  |
| 51.45 | 2080.36 |
| 51.46 | 1785.65 |
| 51.47 | 2080.36 |
| 51.48 | 2340.41 |
| 51.49 | 1837.66 |
| 51.5  | 1941.67 |
| 51.51 | 1941.67 |
| 51.52 | 1872.33 |
| 51.53 | 1820.32 |
| 51.54 | 1733.64 |
| 51.55 | 1907    |
| 51.56 | 2011.02 |
| 51.57 | 1872.33 |
| 51.58 | 1802.98 |
| 51.59 | 2305.74 |
| 51.6  | 1820.32 |
| 51.61 | 1959.01 |
| 51.62 | 1837.66 |
| 51.63 | 1976.35 |
| 51.64 | 1993.68 |
| 51.65 | 2063.03 |
| 51.66 | 2132.37 |
| 51.67 | 2288.4  |
| 51.68 | 2219.06 |
| 51.69 | 2080.36 |
| 51.7  | 1716.3  |
| 51.71 | 1993.68 |
| 51.72 | 1872.33 |
| 51.73 | 1594.95 |
| 51.74 | 2184.38 |
| 51.75 | 2097.7  |
| 51.76 | 2132.37 |
| 51.77 | 1854.99 |



|       |         |
|-------|---------|
| 51.78 | 2444.43 |
| 51.79 | 1768.31 |
| 51.8  | 1993.68 |
| 51.81 | 1629.62 |
| 51.82 | 1872.33 |
| 51.83 | 1716.3  |
| 51.84 | 1785.65 |
| 51.85 | 1959.01 |
| 51.86 | 1750.97 |
| 51.87 | 2063.03 |
| 51.88 | 1542.94 |
| 51.89 | 1889.66 |
| 51.9  | 2028.36 |
| 51.91 | 2167.05 |
| 51.92 | 2305.74 |
| 51.93 | 1941.67 |
| 51.94 | 1889.66 |
| 51.95 | 1889.66 |
| 51.96 | 2028.36 |
| 51.97 | 2063.03 |
| 51.98 | 2236.39 |
| 51.99 | 1733.64 |
| 52    | 1872.33 |
| 52.01 | 1802.98 |
| 52.02 | 2236.39 |
| 52.03 | 1837.66 |
| 52.04 | 1872.33 |
| 52.05 | 1924.34 |
| 52.06 | 1959.01 |
| 52.07 | 1560.27 |
| 52.08 | 2201.72 |
| 52.09 | 1959.01 |
| 52.1  | 1941.67 |
| 52.11 | 1854.99 |
| 52.12 | 1785.65 |
| 52.13 | 1889.66 |
| 52.14 | 1872.33 |
| 52.15 | 1820.32 |
| 52.16 | 1837.66 |
| 52.17 | 1837.66 |
| 52.18 | 1854.99 |
| 52.19 | 2011.02 |
| 52.2  | 1768.31 |
| 52.21 | 2080.36 |

|       |         |
|-------|---------|
| 52.22 | 1976.35 |
| 52.23 | 1733.64 |
| 52.24 | 2011.02 |
| 52.25 | 1924.34 |
| 52.26 | 1889.66 |
| 52.27 | 1750.97 |
| 52.28 | 2045.69 |
| 52.29 | 2097.7  |
| 52.3  | 2011.02 |
| 52.31 | 1959.01 |
| 52.32 | 1698.96 |
| 52.33 | 1941.67 |
| 52.34 | 1594.95 |
| 52.35 | 1664.29 |
| 52.36 | 2115.04 |
| 52.37 | 2253.73 |
| 52.38 | 1802.98 |
| 52.39 | 1802.98 |
| 52.4  | 1924.34 |
| 52.41 | 1768.31 |
| 52.42 | 1993.68 |
| 52.43 | 1924.34 |
| 52.44 | 1993.68 |
| 52.45 | 1889.66 |
| 52.46 | 1889.66 |
| 52.47 | 1837.66 |
| 52.48 | 2201.72 |
| 52.49 | 2028.36 |
| 52.5  | 1646.96 |
| 52.51 | 1941.67 |
| 52.52 | 1924.34 |
| 52.53 | 1681.63 |
| 52.54 | 1698.96 |
| 52.55 | 2097.7  |
| 52.56 | 1716.3  |
| 52.57 | 2011.02 |
| 52.58 | 1854.99 |
| 52.59 | 1993.68 |
| 52.6  | 1664.29 |
| 52.61 | 1560.27 |
| 52.62 | 1698.96 |
| 52.63 | 1837.66 |
| 52.64 | 1941.67 |
| 52.65 | 2045.69 |

|       |         |
|-------|---------|
| 52.66 | 2132.37 |
| 52.67 | 1976.35 |
| 52.68 | 1889.66 |
| 52.69 | 1768.31 |
| 52.7  | 1837.66 |
| 52.71 | 1785.65 |
| 52.72 | 1698.96 |
| 52.73 | 1785.65 |
| 52.74 | 1733.64 |
| 52.75 | 1889.66 |
| 52.76 | 1854.99 |
| 52.77 | 1820.32 |
| 52.78 | 1785.65 |
| 52.79 | 1750.97 |
| 52.8  | 2063.03 |
| 52.81 | 1698.96 |
| 52.82 | 1993.68 |
| 52.83 | 1681.63 |
| 52.84 | 1473.59 |
| 52.85 | 1889.66 |
| 52.86 | 1698.96 |
| 52.87 | 1768.31 |
| 52.88 | 1889.66 |
| 52.89 | 1907    |
| 52.9  | 1542.94 |
| 52.91 | 1508.26 |
| 52.92 | 1508.26 |
| 52.93 | 1525.6  |
| 52.94 | 1629.62 |
| 52.95 | 1854.99 |
| 52.96 | 1612.28 |
| 52.97 | 1941.67 |
| 52.98 | 1750.97 |
| 52.99 | 1959.01 |
| 53    | 1768.31 |
| 53.01 | 1785.65 |
| 53.02 | 1820.32 |
| 53.03 | 1594.95 |
| 53.04 | 2011.02 |
| 53.05 | 1872.33 |
| 53.06 | 1768.31 |
| 53.07 | 1664.29 |
| 53.08 | 1716.3  |
| 53.09 | 2097.7  |

53.1 1733.64  
53.11 1872.33  
53.12 1594.95  
53.13 1681.63  
53.14 1820.32  
53.15 1959.01  
53.16 1612.28  
53.17 1508.26  
53.18 1924.34  
53.19 1802.98  
53.2 1629.62  
53.21 1646.96  
53.22 1768.31  
53.23 2028.36  
53.24 1681.63  
53.25 1542.94  
53.26 1612.28  
53.27 1542.94  
53.28 1785.65  
53.29 1872.33  
53.3 1768.31  
53.31 1733.64  
53.32 1872.33  
53.33 1768.31  
53.34 1872.33  
53.35 1577.61  
53.36 1768.31  
53.37 1560.27  
53.38 1716.3  
53.39 2011.02  
53.4 2115.04  
53.41 1629.62  
53.42 1907  
53.43 1646.96  
53.44 2132.37  
53.45 1733.64  
53.46 1733.64  
53.47 1664.29  
53.48 1768.31  
53.49 1698.96  
53.5 1750.97  
53.51 1560.27  
53.52 1646.96  
53.53 1872.33

|       |         |
|-------|---------|
| 53.54 | 1907    |
| 53.55 | 1681.63 |
| 53.56 | 1664.29 |
| 53.57 | 1542.94 |
| 53.58 | 2063.03 |
| 53.59 | 2028.36 |
| 53.6  | 1681.63 |
| 53.61 | 1785.65 |
| 53.62 | 1854.99 |
| 53.63 | 1976.35 |
| 53.64 | 1768.31 |
| 53.65 | 1664.29 |
| 53.66 | 1889.66 |
| 53.67 | 1768.31 |
| 53.68 | 1646.96 |
| 53.69 | 1785.65 |
| 53.7  | 1438.92 |
| 53.71 | 1664.29 |
| 53.72 | 1854.99 |
| 53.73 | 1629.62 |
| 53.74 | 1820.32 |
| 53.75 | 1924.34 |
| 53.76 | 1629.62 |
| 53.77 | 1664.29 |
| 53.78 | 1993.68 |
| 53.79 | 1993.68 |
| 53.8  | 1560.27 |
| 53.81 | 1594.95 |
| 53.82 | 1716.3  |
| 53.83 | 1542.94 |
| 53.84 | 1872.33 |
| 53.85 | 1716.3  |
| 53.86 | 1907    |
| 53.87 | 1577.61 |
| 53.88 | 1854.99 |
| 53.89 | 1594.95 |
| 53.9  | 1594.95 |
| 53.91 | 1594.95 |
| 53.92 | 1490.93 |
| 53.93 | 1473.59 |
| 53.94 | 1820.32 |
| 53.95 | 1941.67 |
| 53.96 | 1733.64 |
| 53.97 | 1646.96 |

|       |         |
|-------|---------|
| 53.98 | 1681.63 |
| 53.99 | 1716.3  |
| 54    | 1352.24 |
| 54.01 | 1594.95 |
| 54.02 | 1386.91 |
| 54.03 | 1542.94 |
| 54.04 | 1785.65 |
| 54.05 | 1646.96 |
| 54.06 | 1802.98 |
| 54.07 | 1785.65 |
| 54.08 | 1664.29 |
| 54.09 | 1681.63 |
| 54.1  | 1750.97 |
| 54.11 | 1907    |
| 54.12 | 1594.95 |
| 54.13 | 1525.6  |
| 54.14 | 1438.92 |
| 54.15 | 1577.61 |
| 54.16 | 1889.66 |
| 54.17 | 2028.36 |
| 54.18 | 1594.95 |
| 54.19 | 1716.3  |
| 54.2  | 1456.26 |
| 54.21 | 1802.98 |
| 54.22 | 1907    |
| 54.23 | 1716.3  |
| 54.24 | 1854.99 |
| 54.25 | 1872.33 |
| 54.26 | 1924.34 |
| 54.27 | 1386.91 |
| 54.28 | 1612.28 |
| 54.29 | 1681.63 |
| 54.3  | 1733.64 |
| 54.31 | 1733.64 |
| 54.32 | 1733.64 |
| 54.33 | 1768.31 |
| 54.34 | 1594.95 |
| 54.35 | 1750.97 |
| 54.36 | 1438.92 |
| 54.37 | 1525.6  |
| 54.38 | 1629.62 |
| 54.39 | 1872.33 |
| 54.4  | 1820.32 |
| 54.41 | 1837.66 |

|       |         |
|-------|---------|
| 54.42 | 1542.94 |
| 54.43 | 1802.98 |
| 54.44 | 1733.64 |
| 54.45 | 1872.33 |
| 54.46 | 1889.66 |
| 54.47 | 1577.61 |
| 54.48 | 1594.95 |
| 54.49 | 1698.96 |
| 54.5  | 1802.98 |
| 54.51 | 1612.28 |
| 54.52 | 1560.27 |
| 54.53 | 1959.01 |
| 54.54 | 1317.56 |
| 54.55 | 1594.95 |
| 54.56 | 1837.66 |
| 54.57 | 1612.28 |
| 54.58 | 1854.99 |
| 54.59 | 1854.99 |
| 54.6  | 1785.65 |
| 54.61 | 1612.28 |
| 54.62 | 1820.32 |
| 54.63 | 1612.28 |
| 54.64 | 1698.96 |
| 54.65 | 1854.99 |
| 54.66 | 1629.62 |
| 54.67 | 1629.62 |
| 54.68 | 1872.33 |
| 54.69 | 1976.35 |
| 54.7  | 1612.28 |
| 54.71 | 1768.31 |
| 54.72 | 1681.63 |
| 54.73 | 1768.31 |
| 54.74 | 1959.01 |
| 54.75 | 1733.64 |
| 54.76 | 1768.31 |
| 54.77 | 1802.98 |
| 54.78 | 1941.67 |
| 54.79 | 1560.27 |
| 54.8  | 1664.29 |
| 54.81 | 1802.98 |
| 54.82 | 1837.66 |
| 54.83 | 1612.28 |
| 54.84 | 1959.01 |
| 54.85 | 1525.6  |

|       |         |
|-------|---------|
| 54.86 | 1612.28 |
| 54.87 | 1750.97 |
| 54.88 | 1993.68 |
| 54.89 | 1750.97 |
| 54.9  | 1698.96 |
| 54.91 | 1802.98 |
| 54.92 | 1854.99 |
| 54.93 | 1785.65 |
| 54.94 | 1612.28 |
| 54.95 | 1473.59 |
| 54.96 | 1577.61 |
| 54.97 | 1646.96 |
| 54.98 | 1820.32 |
| 54.99 | 1560.27 |
| 55    | 1854.99 |
| 55.01 | 1889.66 |
| 55.02 | 1456.26 |
| 55.03 | 1768.31 |
| 55.04 | 1733.64 |
| 55.05 | 2132.37 |
| 55.06 | 1785.65 |
| 55.07 | 1733.64 |
| 55.08 | 1802.98 |
| 55.09 | 1768.31 |
| 55.1  | 1750.97 |
| 55.11 | 1872.33 |
| 55.12 | 1612.28 |
| 55.13 | 1872.33 |
| 55.14 | 1646.96 |
| 55.15 | 1352.24 |
| 55.16 | 1508.26 |
| 55.17 | 1646.96 |
| 55.18 | 1594.95 |
| 55.19 | 1785.65 |
| 55.2  | 1733.64 |
| 55.21 | 1612.28 |
| 55.22 | 1889.66 |
| 55.23 | 1768.31 |
| 55.24 | 1802.98 |
| 55.25 | 1768.31 |
| 55.26 | 1854.99 |
| 55.27 | 1473.59 |
| 55.28 | 1733.64 |
| 55.29 | 1698.96 |



|       |         |
|-------|---------|
| 55.3  | 1560.27 |
| 55.31 | 1716.3  |
| 55.32 | 1681.63 |
| 55.33 | 1750.97 |
| 55.34 | 1542.94 |
| 55.35 | 1508.26 |
| 55.36 | 1612.28 |
| 55.37 | 1768.31 |
| 55.38 | 1837.66 |
| 55.39 | 1733.64 |
| 55.4  | 1872.33 |
| 55.41 | 1854.99 |
| 55.42 | 1820.32 |
| 55.43 | 1716.3  |
| 55.44 | 1837.66 |
| 55.45 | 1664.29 |
| 55.46 | 1508.26 |
| 55.47 | 1664.29 |
| 55.48 | 1473.59 |
| 55.49 | 2045.69 |
| 55.5  | 1959.01 |
| 55.51 | 1698.96 |
| 55.52 | 1490.93 |
| 55.53 | 1889.66 |
| 55.54 | 1820.32 |
| 55.55 | 1733.64 |
| 55.56 | 1976.35 |
| 55.57 | 1560.27 |
| 55.58 | 1612.28 |
| 55.59 | 1664.29 |
| 55.6  | 1768.31 |
| 55.61 | 1768.31 |
| 55.62 | 1820.32 |
| 55.63 | 1768.31 |
| 55.64 | 1872.33 |
| 55.65 | 1490.93 |
| 55.66 | 1750.97 |
| 55.67 | 1872.33 |
| 55.68 | 1646.96 |
| 55.69 | 1508.26 |
| 55.7  | 1854.99 |
| 55.71 | 1785.65 |
| 55.72 | 1768.31 |
| 55.73 | 1612.28 |

|       |         |
|-------|---------|
| 55.74 | 1646.96 |
| 55.75 | 1785.65 |
| 55.76 | 1716.3  |
| 55.77 | 1508.26 |
| 55.78 | 1733.64 |
| 55.79 | 1508.26 |
| 55.8  | 1560.27 |
| 55.81 | 1820.32 |
| 55.82 | 1733.64 |
| 55.83 | 1542.94 |
| 55.84 | 1508.26 |
| 55.85 | 1820.32 |
| 55.86 | 1802.98 |
| 55.87 | 1820.32 |
| 55.88 | 1941.67 |
| 55.89 | 1837.66 |
| 55.9  | 1907    |
| 55.91 | 2011.02 |
| 55.92 | 1854.99 |
| 55.93 | 1837.66 |
| 55.94 | 1612.28 |
| 55.95 | 1941.67 |
| 55.96 | 1716.3  |
| 55.97 | 1889.66 |
| 55.98 | 1733.64 |
| 55.99 | 1698.96 |
| 56    | 1612.28 |
| 56.01 | 1594.95 |
| 56.02 | 1837.66 |
| 56.03 | 1854.99 |
| 56.04 | 1508.26 |
| 56.05 | 1508.26 |
| 56.06 | 1542.94 |
| 56.07 | 1820.32 |
| 56.08 | 1941.67 |
| 56.09 | 1785.65 |
| 56.1  | 1612.28 |
| 56.11 | 1594.95 |
| 56.12 | 1577.61 |
| 56.13 | 1924.34 |
| 56.14 | 2115.04 |
| 56.15 | 2080.36 |
| 56.16 | 1802.98 |
| 56.17 | 1768.31 |

|       |         |
|-------|---------|
| 56.18 | 1698.96 |
| 56.19 | 1837.66 |
| 56.2  | 1629.62 |
| 56.21 | 1594.95 |
| 56.22 | 1664.29 |
| 56.23 | 1646.96 |
| 56.24 | 1802.98 |
| 56.25 | 1698.96 |
| 56.26 | 1560.27 |
| 56.27 | 1698.96 |
| 56.28 | 1612.28 |
| 56.29 | 1837.66 |
| 56.3  | 1837.66 |
| 56.31 | 1785.65 |
| 56.32 | 2080.36 |
| 56.33 | 1612.28 |
| 56.34 | 1959.01 |
| 56.35 | 1629.62 |
| 56.36 | 1854.99 |
| 56.37 | 2184.38 |
| 56.38 | 1993.68 |
| 56.39 | 2097.7  |
| 56.4  | 1907    |
| 56.41 | 2132.37 |
| 56.42 | 2028.36 |
| 56.43 | 2149.71 |
| 56.44 | 2219.06 |
| 56.45 | 2045.69 |
| 56.46 | 2080.36 |
| 56.47 | 2080.36 |
| 56.48 | 2392.42 |
| 56.49 | 2392.42 |
| 56.5  | 2219.06 |
| 56.51 | 2219.06 |
| 56.52 | 2323.07 |
| 56.53 | 2756.48 |
| 56.54 | 2652.46 |
| 56.55 | 3155.22 |
| 56.56 | 2929.85 |
| 56.57 | 3172.56 |
| 56.58 | 2999.19 |
| 56.59 | 2877.84 |
| 56.6  | 3224.56 |
| 56.61 | 3328.58 |

|       |         |
|-------|---------|
| 56.62 | 3536.62 |
| 56.63 | 3657.97 |
| 56.64 | 3536.62 |
| 56.65 | 4334.09 |
| 56.66 | 4559.47 |
| 56.67 | 4819.51 |
| 56.68 | 4316.76 |
| 56.69 | 4334.09 |
| 56.7  | 4732.83 |
| 56.71 | 4351.43 |
| 56.72 | 5200.91 |
| 56.73 | 5478.29 |
| 56.74 | 4698.16 |
| 56.75 | 4888.86 |
| 56.76 | 4126.06 |
| 56.77 | 4420.77 |
| 56.78 | 4698.16 |
| 56.79 | 4351.43 |
| 56.8  | 4594.14 |
| 56.81 | 4022.04 |
| 56.82 | 3987.37 |
| 56.83 | 4299.42 |
| 56.84 | 3883.35 |
| 56.85 | 3744.66 |
| 56.86 | 3501.95 |
| 56.87 | 3918.02 |
| 56.88 | 3796.67 |
| 56.89 | 3623.3  |
| 56.9  | 3484.61 |
| 56.91 | 3397.93 |
| 56.92 | 3328.58 |
| 56.93 | 3328.58 |
| 56.94 | 3397.93 |
| 56.95 | 3068.54 |
| 56.96 | 2721.81 |
| 56.97 | 2600.46 |
| 56.98 | 2773.82 |
| 56.99 | 2843.16 |
| 57    | 2600.46 |
| 57.01 | 2739.15 |
| 57.02 | 2583.12 |
| 57.03 | 2461.76 |
| 57.04 | 2496.44 |
| 57.05 | 2531.11 |

|       |         |
|-------|---------|
| 57.06 | 2340.41 |
| 57.07 | 2548.45 |
| 57.08 | 2444.43 |
| 57.09 | 2097.7  |
| 57.1  | 2600.46 |
| 57.11 | 2149.71 |
| 57.12 | 2427.09 |
| 57.13 | 2635.13 |
| 57.14 | 2288.4  |
| 57.15 | 2357.75 |
| 57.16 | 2635.13 |
| 57.17 | 2323.07 |
| 57.18 | 2167.05 |
| 57.19 | 2305.74 |
| 57.2  | 2323.07 |
| 57.21 | 2461.76 |
| 57.22 | 2617.79 |
| 57.23 | 2669.8  |
| 57.24 | 2323.07 |
| 57.25 | 2617.79 |
| 57.26 | 2825.83 |
| 57.27 | 3120.55 |
| 57.28 | 2947.18 |
| 57.29 | 3033.86 |
| 57.3  | 3189.89 |
| 57.31 | 3328.58 |
| 57.32 | 3657.97 |
| 57.33 | 3623.3  |
| 57.34 | 3779.33 |
| 57.35 | 4108.72 |
| 57.36 | 4542.13 |
| 57.37 | 4351.43 |
| 57.38 | 4438.11 |
| 57.39 | 4923.53 |
| 57.4  | 5478.29 |
| 57.41 | 5616.98 |
| 57.42 | 6154.41 |
| 57.43 | 6223.76 |
| 57.44 | 6241.09 |
| 57.45 | 6778.52 |
| 57.46 | 7038.57 |
| 57.47 | 7732.02 |
| 57.48 | 7801.37 |
| 57.49 | 8442.81 |

|       |         |
|-------|---------|
| 57.5  | 8529.49 |
| 57.51 | 8824.21 |
| 57.52 | 9968.41 |
| 57.53 | 9864.39 |
| 57.54 | 10055.1 |
| 57.55 | 9240.29 |
| 57.56 | 10020.4 |
| 57.57 | 9673.69 |
| 57.58 | 8754.87 |
| 57.59 | 9153.6  |
| 57.6  | 9309.63 |
| 57.61 | 8200.1  |
| 57.62 | 8269.45 |
| 57.63 | 8286.79 |
| 57.64 | 7801.37 |
| 57.65 | 8269.45 |
| 57.66 | 7940.06 |
| 57.67 | 7905.38 |
| 57.68 | 7940.06 |
| 57.69 | 7315.95 |
| 57.7  | 6657.17 |
| 57.71 | 7281.28 |
| 57.72 | 7402.63 |
| 57.73 | 6449.13 |
| 57.74 | 6033.06 |
| 57.75 | 5616.98 |
| 57.76 | 5426.28 |
| 57.77 | 5790.35 |
| 57.78 | 5200.91 |
| 57.79 | 5148.9  |
| 57.8  | 4871.52 |
| 57.81 | 4230.07 |
| 57.82 | 3605.97 |
| 57.83 | 4351.43 |
| 57.84 | 3918.02 |
| 57.85 | 3918.02 |
| 57.86 | 3380.59 |
| 57.87 | 3796.67 |
| 57.88 | 3467.27 |
| 57.89 | 3276.57 |
| 57.9  | 2895.17 |
| 57.91 | 2808.49 |
| 57.92 | 3415.26 |
| 57.93 | 3519.28 |

|       |         |
|-------|---------|
| 57.94 | 3241.9  |
| 57.95 | 3033.86 |
| 57.96 | 2860.5  |
| 57.97 | 2964.52 |
| 57.98 | 3068.54 |
| 57.99 | 2929.85 |
| 58    | 2721.81 |
| 58.01 | 2496.44 |
| 58.02 | 2999.19 |
| 58.03 | 3068.54 |
| 58.04 | 3085.87 |
| 58.05 | 2756.48 |
| 58.06 | 2756.48 |
| 58.07 | 2860.5  |
| 58.08 | 2583.12 |
| 58.09 | 2704.47 |
| 58.1  | 2756.48 |
| 58.11 | 3103.21 |
| 58.12 | 2548.45 |
| 58.13 | 2669.8  |
| 58.14 | 2860.5  |
| 58.15 | 3033.86 |
| 58.16 | 3120.55 |
| 58.17 | 2860.5  |
| 58.18 | 2947.18 |
| 58.19 | 2895.17 |
| 58.2  | 2912.51 |
| 58.21 | 2721.81 |
| 58.22 | 2895.17 |
| 58.23 | 2860.5  |
| 58.24 | 2947.18 |
| 58.25 | 2479.1  |
| 58.26 | 2531.11 |
| 58.27 | 2652.46 |
| 58.28 | 2635.13 |
| 58.29 | 2843.16 |
| 58.3  | 2565.78 |
| 58.31 | 2739.15 |
| 58.32 | 2617.79 |
| 58.33 | 2461.76 |
| 58.34 | 2375.08 |
| 58.35 | 2115.04 |
| 58.36 | 2600.46 |
| 58.37 | 2323.07 |

|       |         |
|-------|---------|
| 58.38 | 2496.44 |
| 58.39 | 2392.42 |
| 58.4  | 2895.17 |
| 58.41 | 2392.42 |
| 58.42 | 2375.08 |
| 58.43 | 2392.42 |
| 58.44 | 1924.34 |
| 58.45 | 2219.06 |
| 58.46 | 1854.99 |
| 58.47 | 2219.06 |
| 58.48 | 2340.41 |
| 58.49 | 2045.69 |
| 58.5  | 2115.04 |
| 58.51 | 2115.04 |
| 58.52 | 1854.99 |
| 58.53 | 1698.96 |
| 58.54 | 1820.32 |
| 58.55 | 1594.95 |
| 58.56 | 1941.67 |
| 58.57 | 1941.67 |
| 58.58 | 2011.02 |
| 58.59 | 1872.33 |
| 58.6  | 1941.67 |
| 58.61 | 1768.31 |
| 58.62 | 2063.03 |
| 58.63 | 1577.61 |
| 58.64 | 1612.28 |
| 58.65 | 1854.99 |
| 58.66 | 1837.66 |
| 58.67 | 1681.63 |
| 58.68 | 1716.3  |
| 58.69 | 1837.66 |
| 58.7  | 1941.67 |
| 58.71 | 2080.36 |
| 58.72 | 2028.36 |
| 58.73 | 1698.96 |
| 58.74 | 1681.63 |
| 58.75 | 1924.34 |
| 58.76 | 1802.98 |
| 58.77 | 1872.33 |
| 58.78 | 1768.31 |
| 58.79 | 1820.32 |
| 58.8  | 1820.32 |
| 58.81 | 1560.27 |



|       |         |
|-------|---------|
| 58.82 | 1785.65 |
| 58.83 | 1907    |
| 58.84 | 1612.28 |
| 58.85 | 1889.66 |
| 58.86 | 1768.31 |
| 58.87 | 1629.62 |
| 58.88 | 1924.34 |
| 58.89 | 1889.66 |
| 58.9  | 1664.29 |
| 58.91 | 1629.62 |
| 58.92 | 1404.25 |
| 58.93 | 1854.99 |
| 58.94 | 1750.97 |
| 58.95 | 1681.63 |
| 58.96 | 1872.33 |
| 58.97 | 1993.68 |
| 58.98 | 1959.01 |
| 58.99 | 1612.28 |
| 59    | 1802.98 |
| 59.01 | 1802.98 |
| 59.02 | 1698.96 |
| 59.03 | 1560.27 |
| 59.04 | 1542.94 |
| 59.05 | 1837.66 |
| 59.06 | 1646.96 |
| 59.07 | 1768.31 |
| 59.08 | 1733.64 |
| 59.09 | 1889.66 |
| 59.1  | 2063.03 |
| 59.11 | 1750.97 |
| 59.12 | 1820.32 |
| 59.13 | 1854.99 |
| 59.14 | 1837.66 |
| 59.15 | 1837.66 |
| 59.16 | 1508.26 |
| 59.17 | 1473.59 |
| 59.18 | 1525.6  |
| 59.19 | 1837.66 |
| 59.2  | 1664.29 |
| 59.21 | 1854.99 |
| 59.22 | 1889.66 |
| 59.23 | 1698.96 |
| 59.24 | 1560.27 |
| 59.25 | 1907    |

|       |         |
|-------|---------|
| 59.26 | 1577.61 |
| 59.27 | 1733.64 |
| 59.28 | 1889.66 |
| 59.29 | 1508.26 |
| 59.3  | 1646.96 |
| 59.31 | 1907    |
| 59.32 | 1594.95 |
| 59.33 | 1889.66 |
| 59.34 | 1785.65 |
| 59.35 | 1542.94 |
| 59.36 | 1525.6  |
| 59.37 | 1993.68 |
| 59.38 | 1508.26 |
| 59.39 | 1716.3  |
| 59.4  | 1525.6  |
| 59.41 | 1456.26 |
| 59.42 | 1872.33 |
| 59.43 | 1646.96 |
| 59.44 | 1577.61 |
| 59.45 | 1698.96 |
| 59.46 | 1560.27 |
| 59.47 | 1542.94 |
| 59.48 | 1421.58 |
| 59.49 | 1456.26 |
| 59.5  | 1594.95 |
| 59.51 | 1352.24 |
| 59.52 | 1716.3  |
| 59.53 | 1820.32 |
| 59.54 | 1577.61 |
| 59.55 | 1959.01 |
| 59.56 | 1716.3  |
| 59.57 | 1716.3  |
| 59.58 | 1594.95 |
| 59.59 | 1698.96 |
| 59.6  | 1386.91 |
| 59.61 | 1577.61 |
| 59.62 | 1508.26 |
| 59.63 | 1456.26 |
| 59.64 | 1664.29 |
| 59.65 | 1300.23 |
| 59.66 | 1542.94 |
| 59.67 | 1542.94 |
| 59.68 | 1802.98 |
| 59.69 | 1317.56 |

|       |         |
|-------|---------|
| 59.7  | 1802.98 |
| 59.71 | 1473.59 |
| 59.72 | 1716.3  |
| 59.73 | 1768.31 |
| 59.74 | 1820.32 |
| 59.75 | 1542.94 |
| 59.76 | 1924.34 |
| 59.77 | 1889.66 |
| 59.78 | 1542.94 |
| 59.79 | 1889.66 |
| 59.8  | 1646.96 |
| 59.81 | 1577.61 |
| 59.82 | 1577.61 |
| 59.83 | 1785.65 |
| 59.84 | 1889.66 |
| 59.85 | 1473.59 |
| 59.86 | 1733.64 |
| 59.87 | 1959.01 |
| 59.88 | 1802.98 |
| 59.89 | 1664.29 |
| 59.9  | 1646.96 |
| 59.91 | 1993.68 |
| 59.92 | 1577.61 |
| 59.93 | 1490.93 |
| 59.94 | 1525.6  |
| 59.95 | 1681.63 |
| 59.96 | 1508.26 |
| 59.97 | 1542.94 |
| 59.98 | 1508.26 |
| 59.99 | 1785.65 |
| 60    | 1456.26 |
| 60.01 | 1716.3  |
| 60.02 | 1664.29 |
| 60.03 | 1421.58 |
| 60.04 | 1352.24 |
| 60.05 | 1560.27 |
| 60.06 | 1473.59 |
| 60.07 | 1525.6  |
| 60.08 | 1837.66 |
| 60.09 | 1629.62 |
| 60.1  | 1542.94 |
| 60.11 | 1733.64 |
| 60.12 | 1490.93 |
| 60.13 | 1716.3  |

|       |         |
|-------|---------|
| 60.14 | 1768.31 |
| 60.15 | 1577.61 |
| 60.16 | 1785.65 |
| 60.17 | 1456.26 |
| 60.18 | 1733.64 |
| 60.19 | 1490.93 |
| 60.2  | 1542.94 |
| 60.21 | 1473.59 |
| 60.22 | 1577.61 |
| 60.23 | 1386.91 |
| 60.24 | 1144.2  |
| 60.25 | 1542.94 |
| 60.26 | 1594.95 |
| 60.27 | 1560.27 |
| 60.28 | 1629.62 |
| 60.29 | 1681.63 |
| 60.3  | 1577.61 |
| 60.31 | 1560.27 |
| 60.32 | 2028.36 |
| 60.33 | 1542.94 |
| 60.34 | 1577.61 |
| 60.35 | 1525.6  |
| 60.36 | 1646.96 |
| 60.37 | 1924.34 |
| 60.38 | 1889.66 |
| 60.39 | 1750.97 |
| 60.4  | 1785.65 |
| 60.41 | 2011.02 |
| 60.42 | 1768.31 |
| 60.43 | 1924.34 |
| 60.44 | 1889.66 |
| 60.45 | 1924.34 |
| 60.46 | 1750.97 |
| 60.47 | 1907    |
| 60.48 | 2011.02 |
| 60.49 | 1854.99 |
| 60.5  | 2167.05 |
| 60.51 | 1802.98 |
| 60.52 | 2097.7  |
| 60.53 | 2219.06 |
| 60.54 | 2132.37 |
| 60.55 | 2721.81 |
| 60.56 | 2340.41 |
| 60.57 | 2513.77 |

|       |         |
|-------|---------|
| 60.58 | 2461.76 |
| 60.59 | 2583.12 |
| 60.6  | 2617.79 |
| 60.61 | 2600.46 |
| 60.62 | 2600.46 |
| 60.63 | 3155.22 |
| 60.64 | 3189.89 |
| 60.65 | 3276.57 |
| 60.66 | 3120.55 |
| 60.67 | 3848.67 |
| 60.68 | 3553.96 |
| 60.69 | 3918.02 |
| 60.7  | 3675.31 |
| 60.71 | 4594.14 |
| 60.72 | 4819.51 |
| 60.73 | 5148.9  |
| 60.74 | 5634.32 |
| 60.75 | 5807.68 |
| 60.76 | 6015.72 |
| 60.77 | 6223.76 |
| 60.78 | 6362.45 |
| 60.79 | 6327.78 |
| 60.8  | 6449.13 |
| 60.81 | 7298.61 |
| 60.82 | 6691.84 |
| 60.83 | 6501.14 |
| 60.84 | 6813.19 |
| 60.85 | 6535.81 |
| 60.86 | 6206.42 |
| 60.87 | 5616.98 |
| 60.88 | 6379.78 |
| 60.89 | 6085.07 |
| 60.9  | 5582.31 |
| 60.91 | 5738.34 |
| 60.92 | 5755.67 |
| 60.93 | 6241.09 |
| 60.94 | 5738.34 |
| 60.95 | 5582.31 |
| 60.96 | 5773.01 |
| 60.97 | 5426.28 |
| 60.98 | 4836.85 |
| 60.99 | 5946.38 |
| 61    | 5616.98 |
| 61.01 | 5426.28 |

|       |         |
|-------|---------|
| 61.02 | 4663.48 |
| 61.03 | 4646.15 |
| 61.04 | 5218.25 |
| 61.05 | 4958.2  |
| 61.06 | 4958.2  |
| 61.07 | 5825.02 |
| 61.08 | 5044.88 |
| 61.09 | 5356.94 |
| 61.1  | 5079.56 |
| 61.11 | 5200.91 |
| 61.12 | 5408.95 |
| 61.13 | 4594.14 |
| 61.14 | 4940.87 |
| 61.15 | 4802.17 |
| 61.16 | 5616.98 |
| 61.17 | 4819.51 |
| 61.18 | 4386.1  |
| 61.19 | 4802.17 |
| 61.2  | 4455.45 |
| 61.21 | 4230.07 |
| 61.22 | 4178.07 |
| 61.23 | 4108.72 |
| 61.24 | 4022.04 |
| 61.25 | 4022.04 |
| 61.26 | 4594.14 |
| 61.27 | 4334.09 |
| 61.28 | 4004.7  |
| 61.29 | 3761.99 |
| 61.3  | 4403.44 |
| 61.31 | 4334.09 |
| 61.32 | 3952.69 |
| 61.33 | 4351.43 |
| 61.34 | 3761.99 |
| 61.35 | 3883.35 |
| 61.36 | 3831.34 |
| 61.37 | 3727.32 |
| 61.38 | 4264.75 |
| 61.39 | 4108.72 |
| 61.4  | 3779.33 |
| 61.41 | 3692.65 |
| 61.42 | 4264.75 |
| 61.43 | 4126.06 |
| 61.44 | 4420.77 |
| 61.45 | 4299.42 |

|       |         |
|-------|---------|
| 61.46 | 4628.81 |
| 61.47 | 4524.79 |
| 61.48 | 4958.2  |
| 61.49 | 4611.47 |
| 61.5  | 4646.15 |
| 61.51 | 4542.13 |
| 61.52 | 4178.07 |
| 61.53 | 4247.41 |
| 61.54 | 4074.05 |
| 61.55 | 4004.7  |
| 61.56 | 4039.37 |
| 61.57 | 4022.04 |
| 61.58 | 3675.31 |
| 61.59 | 3952.69 |
| 61.6  | 3848.67 |
| 61.61 | 3449.94 |
| 61.62 | 3952.69 |
| 61.63 | 3293.91 |
| 61.64 | 3657.97 |
| 61.65 | 3207.23 |
| 61.66 | 3345.92 |
| 61.67 | 3501.95 |
| 61.68 | 3397.93 |
| 61.69 | 3345.92 |
| 61.7  | 3155.22 |
| 61.71 | 3033.86 |
| 61.72 | 3189.89 |
| 61.73 | 3328.58 |
| 61.74 | 2600.46 |
| 61.75 | 2773.82 |
| 61.76 | 2617.79 |
| 61.77 | 2444.43 |
| 61.78 | 2652.46 |
| 61.79 | 2323.07 |
| 61.8  | 2409.76 |
| 61.81 | 2323.07 |
| 61.82 | 2357.75 |
| 61.83 | 2253.73 |
| 61.84 | 2080.36 |
| 61.85 | 2548.45 |
| 61.86 | 2219.06 |
| 61.87 | 2080.36 |
| 61.88 | 2253.73 |
| 61.89 | 1924.34 |

|       |         |
|-------|---------|
| 61.9  | 2011.02 |
| 61.91 | 1907    |
| 61.92 | 1959.01 |
| 61.93 | 1924.34 |
| 61.94 | 1941.67 |
| 61.95 | 2028.36 |
| 61.96 | 1820.32 |
| 61.97 | 1837.66 |
| 61.98 | 2063.03 |
| 61.99 | 1907    |
| 62    | 2011.02 |
| 62.01 | 1872.33 |
| 62.02 | 2045.69 |
| 62.03 | 2097.7  |
| 62.04 | 1456.26 |
| 62.05 | 1924.34 |
| 62.06 | 1785.65 |
| 62.07 | 1907    |
| 62.08 | 1854.99 |
| 62.09 | 1872.33 |
| 62.1  | 1924.34 |
| 62.11 | 1820.32 |
| 62.12 | 1941.67 |
| 62.13 | 1716.3  |
| 62.14 | 1733.64 |
| 62.15 | 1542.94 |
| 62.16 | 1802.98 |
| 62.17 | 1698.96 |
| 62.18 | 1785.65 |
| 62.19 | 1577.61 |
| 62.2  | 1768.31 |
| 62.21 | 1629.62 |
| 62.22 | 1681.63 |
| 62.23 | 1716.3  |
| 62.24 | 1542.94 |
| 62.25 | 1802.98 |
| 62.26 | 1716.3  |
| 62.27 | 1421.58 |
| 62.28 | 1681.63 |
| 62.29 | 1750.97 |
| 62.3  | 1282.89 |
| 62.31 | 1612.28 |
| 62.32 | 1664.29 |
| 62.33 | 1802.98 |



|       |         |
|-------|---------|
| 62.34 | 1698.96 |
| 62.35 | 1750.97 |
| 62.36 | 1473.59 |
| 62.37 | 1854.99 |
| 62.38 | 1369.57 |
| 62.39 | 1404.25 |
| 62.4  | 1438.92 |
| 62.41 | 1473.59 |
| 62.42 | 1854.99 |
| 62.43 | 1560.27 |
| 62.44 | 1508.26 |
| 62.45 | 1768.31 |
| 62.46 | 1594.95 |
| 62.47 | 1421.58 |
| 62.48 | 1577.61 |
| 62.49 | 1785.65 |
| 62.5  | 1508.26 |
| 62.51 | 1525.6  |
| 62.52 | 1629.62 |
| 62.53 | 1629.62 |
| 62.54 | 1768.31 |
| 62.55 | 1525.6  |
| 62.56 | 1525.6  |
| 62.57 | 1959.01 |
| 62.58 | 1629.62 |
| 62.59 | 1976.35 |
| 62.6  | 1802.98 |
| 62.61 | 1820.32 |
| 62.62 | 1525.6  |
| 62.63 | 1282.89 |
| 62.64 | 1785.65 |
| 62.65 | 1629.62 |
| 62.66 | 1525.6  |
| 62.67 | 1438.92 |
| 62.68 | 1525.6  |
| 62.69 | 1837.66 |
| 62.7  | 1768.31 |
| 62.71 | 1716.3  |
| 62.72 | 1768.31 |
| 62.73 | 1560.27 |
| 62.74 | 1456.26 |
| 62.75 | 1854.99 |
| 62.76 | 1612.28 |
| 62.77 | 1872.33 |

|       |         |
|-------|---------|
| 62.78 | 1872.33 |
| 62.79 | 1594.95 |
| 62.8  | 1646.96 |
| 62.81 | 1820.32 |
| 62.82 | 1646.96 |
| 62.83 | 1820.32 |
| 62.84 | 1976.35 |
| 62.85 | 1802.98 |
| 62.86 | 1820.32 |
| 62.87 | 1733.64 |
| 62.88 | 1750.97 |
| 62.89 | 1716.3  |
| 62.9  | 2097.7  |
| 62.91 | 1612.28 |
| 62.92 | 1629.62 |
| 62.93 | 1872.33 |
| 62.94 | 1820.32 |
| 62.95 | 2080.36 |
| 62.96 | 1733.64 |
| 62.97 | 1820.32 |
| 62.98 | 2097.7  |
| 62.99 | 1750.97 |
| 63    | 2149.71 |
| 63.01 | 2184.38 |
| 63.02 | 2201.72 |
| 63.03 | 2288.4  |
| 63.04 | 2201.72 |
| 63.05 | 2479.1  |
| 63.06 | 2305.74 |
| 63.07 | 2340.41 |
| 63.08 | 2340.41 |
| 63.09 | 2496.44 |
| 63.1  | 2704.47 |
| 63.11 | 2687.14 |
| 63.12 | 2981.86 |
| 63.13 | 3051.2  |
| 63.14 | 2964.52 |
| 63.15 | 2877.84 |
| 63.16 | 3103.21 |
| 63.17 | 3380.59 |
| 63.18 | 3033.86 |
| 63.19 | 3571.29 |
| 63.2  | 3449.94 |
| 63.21 | 3519.28 |

|       |         |
|-------|---------|
| 63.22 | 3033.86 |
| 63.23 | 2808.49 |
| 63.24 | 2929.85 |
| 63.25 | 3068.54 |
| 63.26 | 2791.16 |
| 63.27 | 3051.2  |
| 63.28 | 2756.48 |
| 63.29 | 2912.51 |
| 63.3  | 2791.16 |
| 63.31 | 2687.14 |
| 63.32 | 2739.15 |
| 63.33 | 2929.85 |
| 63.34 | 2617.79 |
| 63.35 | 2496.44 |
| 63.36 | 2791.16 |
| 63.37 | 2669.8  |
| 63.38 | 2340.41 |
| 63.39 | 2097.7  |
| 63.4  | 2427.09 |
| 63.41 | 2357.75 |
| 63.42 | 2097.7  |
| 63.43 | 2479.1  |
| 63.44 | 2271.06 |
| 63.45 | 2201.72 |
| 63.46 | 2305.74 |
| 63.47 | 2184.38 |
| 63.48 | 2028.36 |
| 63.49 | 2011.02 |
| 63.5  | 2063.03 |
| 63.51 | 1959.01 |
| 63.52 | 1802.98 |
| 63.53 | 1889.66 |
| 63.54 | 1924.34 |
| 63.55 | 1802.98 |
| 63.56 | 2271.06 |
| 63.57 | 1924.34 |
| 63.58 | 1872.33 |
| 63.59 | 1976.35 |
| 63.6  | 1698.96 |
| 63.61 | 1768.31 |
| 63.62 | 1421.58 |
| 63.63 | 1664.29 |
| 63.64 | 1802.98 |
| 63.65 | 1750.97 |

|       |         |
|-------|---------|
| 63.66 | 1802.98 |
| 63.67 | 1629.62 |
| 63.68 | 1854.99 |
| 63.69 | 1785.65 |
| 63.7  | 1681.63 |
| 63.71 | 1941.67 |
| 63.72 | 1716.3  |
| 63.73 | 1525.6  |
| 63.74 | 1646.96 |
| 63.75 | 1785.65 |
| 63.76 | 1681.63 |
| 63.77 | 1542.94 |
| 63.78 | 1698.96 |
| 63.79 | 1161.54 |
| 63.8  | 1594.95 |
| 63.81 | 1490.93 |
| 63.82 | 1698.96 |
| 63.83 | 1612.28 |
| 63.84 | 1664.29 |
| 63.85 | 1594.95 |
| 63.86 | 1820.32 |
| 63.87 | 1681.63 |
| 63.88 | 1664.29 |
| 63.89 | 1508.26 |
| 63.9  | 1438.92 |
| 63.91 | 1577.61 |
| 63.92 | 1421.58 |
| 63.93 | 1716.3  |
| 63.94 | 1802.98 |
| 63.95 | 1473.59 |
| 63.96 | 1542.94 |
| 63.97 | 1820.32 |
| 63.98 | 1646.96 |
| 63.99 | 1629.62 |
| 64    | 1612.28 |
| 64.01 | 1421.58 |
| 64.02 | 1404.25 |
| 64.03 | 1508.26 |
| 64.04 | 1560.27 |
| 64.05 | 1421.58 |
| 64.06 | 1421.58 |
| 64.07 | 1438.92 |
| 64.08 | 1577.61 |
| 64.09 | 1629.62 |

|       |         |
|-------|---------|
| 64.1  | 1334.9  |
| 64.11 | 1473.59 |
| 64.12 | 1560.27 |
| 64.13 | 1577.61 |
| 64.14 | 1716.3  |
| 64.15 | 1785.65 |
| 64.16 | 1872.33 |
| 64.17 | 1750.97 |
| 64.18 | 1629.62 |
| 64.19 | 1612.28 |
| 64.2  | 1664.29 |
| 64.21 | 1577.61 |
| 64.22 | 1456.26 |
| 64.23 | 1473.59 |
| 64.24 | 1490.93 |
| 64.25 | 1490.93 |
| 64.26 | 1560.27 |
| 64.27 | 1646.96 |
| 64.28 | 1490.93 |
| 64.29 | 1525.6  |
| 64.3  | 1924.34 |
| 64.31 | 1612.28 |
| 64.32 | 1646.96 |
| 64.33 | 1768.31 |
| 64.34 | 1473.59 |
| 64.35 | 1612.28 |
| 64.36 | 1438.92 |
| 64.37 | 1542.94 |
| 64.38 | 1542.94 |
| 64.39 | 1352.24 |
| 64.4  | 1664.29 |
| 64.41 | 1768.31 |
| 64.42 | 1664.29 |
| 64.43 | 1594.95 |
| 64.44 | 1750.97 |
| 64.45 | 1785.65 |
| 64.46 | 2045.69 |
| 64.47 | 2028.36 |
| 64.48 | 2097.7  |
| 64.49 | 2392.42 |
| 64.5  | 2115.04 |
| 64.51 | 1854.99 |
| 64.52 | 2375.08 |
| 64.53 | 2271.06 |

|       |         |
|-------|---------|
| 64.54 | 2340.41 |
| 64.55 | 2652.46 |
| 64.56 | 2617.79 |
| 64.57 | 2635.13 |
| 64.58 | 2392.42 |
| 64.59 | 2739.15 |
| 64.6  | 2756.48 |
| 64.61 | 2895.17 |
| 64.62 | 3293.91 |
| 64.63 | 3224.56 |
| 64.64 | 3103.21 |
| 64.65 | 3640.64 |
| 64.66 | 3814    |
| 64.67 | 3744.66 |
| 64.68 | 4074.05 |
| 64.69 | 4368.77 |
| 64.7  | 4732.83 |
| 64.71 | 4923.53 |
| 64.72 | 5616.98 |
| 64.73 | 5010.21 |
| 64.74 | 5148.9  |
| 64.75 | 5825.02 |
| 64.76 | 5790.35 |
| 64.77 | 6449.13 |
| 64.78 | 6293.1  |
| 64.79 | 6171.75 |
| 64.8  | 6587.82 |
| 64.81 | 6119.74 |
| 64.82 | 7038.57 |
| 64.83 | 6587.82 |
| 64.84 | 5877.03 |
| 64.85 | 6431.79 |
| 64.86 | 6362.45 |
| 64.87 | 5738.34 |
| 64.88 | 5859.69 |
| 64.89 | 5426.28 |
| 64.9  | 5027.55 |
| 64.91 | 5027.55 |
| 64.92 | 5790.35 |
| 64.93 | 5391.61 |
| 64.94 | 5235.58 |
| 64.95 | 5426.28 |
| 64.96 | 5339.6  |
| 64.97 | 5512.97 |

|       |         |
|-------|---------|
| 64.98 | 4628.81 |
| 64.99 | 4178.07 |
| 65    | 4715.49 |
| 65.01 | 4368.77 |
| 65.02 | 4490.12 |
| 65.03 | 4178.07 |
| 65.04 | 4091.38 |
| 65.05 | 3796.67 |
| 65.06 | 3848.67 |
| 65.07 | 3501.95 |
| 65.08 | 3380.59 |
| 65.09 | 3068.54 |
| 65.1  | 3276.57 |
| 65.11 | 3415.26 |
| 65.12 | 2929.85 |
| 65.13 | 2617.79 |
| 65.14 | 2756.48 |
| 65.15 | 2617.79 |
| 65.16 | 2721.81 |
| 65.17 | 2773.82 |
| 65.18 | 2704.47 |
| 65.19 | 2375.08 |
| 65.2  | 2548.45 |
| 65.21 | 2444.43 |
| 65.22 | 2496.44 |
| 65.23 | 2011.02 |
| 65.24 | 2097.7  |
| 65.25 | 1872.33 |
| 65.26 | 2045.69 |
| 65.27 | 2652.46 |
| 65.28 | 2357.75 |
| 65.29 | 1872.33 |
| 65.3  | 1854.99 |
| 65.31 | 2167.05 |
| 65.32 | 2357.75 |
| 65.33 | 1959.01 |
| 65.34 | 2305.74 |
| 65.35 | 2080.36 |
| 65.36 | 1941.67 |
| 65.37 | 2149.71 |
| 65.38 | 2513.77 |
| 65.39 | 2288.4  |
| 65.4  | 2444.43 |
| 65.41 | 2288.4  |

|       |         |
|-------|---------|
| 65.42 | 2219.06 |
| 65.43 | 2669.8  |
| 65.44 | 2167.05 |
| 65.45 | 2375.08 |
| 65.46 | 2565.78 |
| 65.47 | 2513.77 |
| 65.48 | 2600.46 |
| 65.49 | 2548.45 |
| 65.5  | 3033.86 |
| 65.51 | 2947.18 |
| 65.52 | 2635.13 |
| 65.53 | 2721.81 |
| 65.54 | 2999.19 |
| 65.55 | 3241.9  |
| 65.56 | 3189.89 |
| 65.57 | 3276.57 |
| 65.58 | 3328.58 |
| 65.59 | 3675.31 |
| 65.6  | 4056.71 |
| 65.61 | 3866.01 |
| 65.62 | 4022.04 |
| 65.63 | 4299.42 |
| 65.64 | 4403.44 |
| 65.65 | 4750.17 |
| 65.66 | 4542.13 |
| 65.67 | 4992.87 |
| 65.68 | 4888.86 |
| 65.69 | 5460.96 |
| 65.7  | 5426.28 |
| 65.71 | 4906.19 |
| 65.72 | 4854.18 |
| 65.73 | 4784.84 |
| 65.74 | 5304.93 |
| 65.75 | 5096.89 |
| 65.76 | 5356.94 |
| 65.77 | 5235.58 |
| 65.78 | 4316.76 |
| 65.79 | 4871.52 |
| 65.8  | 5252.92 |
| 65.81 | 4542.13 |
| 65.82 | 4611.47 |
| 65.83 | 4559.47 |
| 65.84 | 4212.74 |
| 65.85 | 4507.46 |



|       |         |
|-------|---------|
| 65.86 | 4299.42 |
| 65.87 | 4091.38 |
| 65.88 | 4056.71 |
| 65.89 | 4160.73 |
| 65.9  | 4126.06 |
| 65.91 | 3883.35 |
| 65.92 | 3900.68 |
| 65.93 | 3709.98 |
| 65.94 | 3415.26 |
| 65.95 | 3241.9  |
| 65.96 | 3259.24 |
| 65.97 | 3207.23 |
| 65.98 | 2791.16 |
| 65.99 | 2721.81 |
| 66    | 2773.82 |
| 66.01 | 2635.13 |
| 66.02 | 2340.41 |
| 66.03 | 2513.77 |
| 66.04 | 2375.08 |
| 66.05 | 2184.38 |
| 66.06 | 2635.13 |
| 66.07 | 2635.13 |
| 66.08 | 2392.42 |
| 66.09 | 2375.08 |
| 66.1  | 1907    |
| 66.11 | 2063.03 |
| 66.12 | 2167.05 |
| 66.13 | 2427.09 |
| 66.14 | 2097.7  |
| 66.15 | 1976.35 |
| 66.16 | 1907    |
| 66.17 | 1993.68 |
| 66.18 | 2028.36 |
| 66.19 | 2011.02 |
| 66.2  | 1802.98 |
| 66.21 | 1959.01 |
| 66.22 | 1924.34 |
| 66.23 | 1750.97 |
| 66.24 | 2271.06 |
| 66.25 | 2028.36 |
| 66.26 | 1716.3  |
| 66.27 | 1768.31 |
| 66.28 | 1768.31 |
| 66.29 | 1785.65 |

|       |         |
|-------|---------|
| 66.3  | 1802.98 |
| 66.31 | 1768.31 |
| 66.32 | 1768.31 |
| 66.33 | 1733.64 |
| 66.34 | 1681.63 |
| 66.35 | 1768.31 |
| 66.36 | 1629.62 |
| 66.37 | 1716.3  |
| 66.38 | 1594.95 |
| 66.39 | 1542.94 |
| 66.4  | 1352.24 |
| 66.41 | 1404.25 |
| 66.42 | 1612.28 |
| 66.43 | 1282.89 |
| 66.44 | 1421.58 |
| 66.45 | 1698.96 |
| 66.46 | 1802.98 |
| 66.47 | 1681.63 |
| 66.48 | 1542.94 |
| 66.49 | 1594.95 |
| 66.5  | 1490.93 |
| 66.51 | 1698.96 |
| 66.52 | 1490.93 |
| 66.53 | 1525.6  |
| 66.54 | 1438.92 |
| 66.55 | 1369.57 |
| 66.56 | 1196.21 |
| 66.57 | 1490.93 |
| 66.58 | 1612.28 |
| 66.59 | 1716.3  |
| 66.6  | 1629.62 |
| 66.61 | 1560.27 |
| 66.62 | 1300.23 |
| 66.63 | 1213.55 |
| 66.64 | 1352.24 |
| 66.65 | 1629.62 |
| 66.66 | 1664.29 |
| 66.67 | 1646.96 |
| 66.68 | 1369.57 |
| 66.69 | 1490.93 |
| 66.7  | 1525.6  |
| 66.71 | 1542.94 |
| 66.72 | 1716.3  |
| 66.73 | 1577.61 |

|       |         |
|-------|---------|
| 66.74 | 1646.96 |
| 66.75 | 1750.97 |
| 66.76 | 1334.9  |
| 66.77 | 1369.57 |
| 66.78 | 1681.63 |
| 66.79 | 1542.94 |
| 66.8  | 1594.95 |
| 66.81 | 1386.91 |
| 66.82 | 1265.56 |
| 66.83 | 1230.88 |
| 66.84 | 1248.22 |
| 66.85 | 1334.9  |
| 66.86 | 1265.56 |
| 66.87 | 1404.25 |
| 66.88 | 1594.95 |
| 66.89 | 1300.23 |
| 66.9  | 1456.26 |
| 66.91 | 1594.95 |
| 66.92 | 1404.25 |
| 66.93 | 1317.56 |
| 66.94 | 1369.57 |
| 66.95 | 1456.26 |
| 66.96 | 1092.19 |
| 66.97 | 1352.24 |
| 66.98 | 1317.56 |
| 66.99 | 1560.27 |
| 67    | 1577.61 |
| 67.01 | 1490.93 |
| 67.02 | 1352.24 |
| 67.03 | 1161.54 |
| 67.04 | 1300.23 |
| 67.05 | 1144.2  |
| 67.06 | 1473.59 |
| 67.07 | 1144.2  |
| 67.08 | 1334.9  |
| 67.09 | 1438.92 |
| 67.1  | 1317.56 |
| 67.11 | 1525.6  |
| 67.12 | 1473.59 |
| 67.13 | 1334.9  |
| 67.14 | 1300.23 |
| 67.15 | 1334.9  |
| 67.16 | 1248.22 |
| 67.17 | 1473.59 |

|       |         |
|-------|---------|
| 67.18 | 1300.23 |
| 67.19 | 1144.2  |
| 67.2  | 1438.92 |
| 67.21 | 1213.55 |
| 67.22 | 1404.25 |
| 67.23 | 1473.59 |
| 67.24 | 1508.26 |
| 67.25 | 1334.9  |
| 67.26 | 1352.24 |
| 67.27 | 1456.26 |
| 67.28 | 1386.91 |
| 67.29 | 1456.26 |
| 67.3  | 1334.9  |
| 67.31 | 1386.91 |
| 67.32 | 1421.58 |
| 67.33 | 1525.6  |
| 67.34 | 1421.58 |
| 67.35 | 1473.59 |
| 67.36 | 1473.59 |
| 67.37 | 1404.25 |
| 67.38 | 1161.54 |
| 67.39 | 1369.57 |
| 67.4  | 1369.57 |
| 67.41 | 1317.56 |
| 67.42 | 1248.22 |
| 67.43 | 1352.24 |
| 67.44 | 1525.6  |
| 67.45 | 1508.26 |
| 67.46 | 1317.56 |
| 67.47 | 1404.25 |
| 67.48 | 1196.21 |
| 67.49 | 1629.62 |
| 67.5  | 1300.23 |
| 67.51 | 1334.9  |
| 67.52 | 1265.56 |
| 67.53 | 1490.93 |
| 67.54 | 1265.56 |
| 67.55 | 1334.9  |
| 67.56 | 1369.57 |
| 67.57 | 1473.59 |
| 67.58 | 1352.24 |
| 67.59 | 1109.53 |
| 67.6  | 1161.54 |
| 67.61 | 1404.25 |

|       |         |
|-------|---------|
| 67.62 | 1196.21 |
| 67.63 | 1144.2  |
| 67.64 | 1542.94 |
| 67.65 | 1074.85 |
| 67.66 | 1369.57 |
| 67.67 | 1057.52 |
| 67.68 | 1386.91 |
| 67.69 | 1334.9  |
| 67.7  | 1317.56 |
| 67.71 | 1282.89 |
| 67.72 | 1334.9  |
| 67.73 | 1126.86 |
| 67.74 | 1248.22 |
| 67.75 | 1404.25 |
| 67.76 | 1352.24 |
| 67.77 | 1109.53 |
| 67.78 | 1230.88 |
| 67.79 | 1300.23 |
| 67.8  | 1490.93 |
| 67.81 | 1456.26 |
| 67.82 | 1213.55 |
| 67.83 | 1248.22 |
| 67.84 | 1369.57 |
| 67.85 | 1369.57 |
| 67.86 | 1213.55 |
| 67.87 | 1404.25 |
| 67.88 | 1248.22 |
| 67.89 | 1560.27 |
| 67.9  | 1334.9  |
| 67.91 | 1092.19 |
| 67.92 | 1144.2  |
| 67.93 | 1404.25 |
| 67.94 | 1265.56 |
| 67.95 | 1421.58 |
| 67.96 | 1282.89 |
| 67.97 | 1300.23 |
| 67.98 | 1438.92 |
| 67.99 | 1664.29 |
| 68    | 1369.57 |
| 68.01 | 1265.56 |
| 68.02 | 1560.27 |
| 68.03 | 1334.9  |
| 68.04 | 1248.22 |
| 68.05 | 1386.91 |

|       |         |
|-------|---------|
| 68.06 | 1404.25 |
| 68.07 | 1352.24 |
| 68.08 | 1074.85 |
| 68.09 | 1126.86 |
| 68.1  | 1577.61 |
| 68.11 | 1594.95 |
| 68.12 | 1473.59 |
| 68.13 | 1092.19 |
| 68.14 | 1334.9  |
| 68.15 | 1213.55 |
| 68.16 | 1300.23 |
| 68.17 | 1317.56 |
| 68.18 | 1300.23 |
| 68.19 | 1473.59 |
| 68.2  | 1490.93 |
| 68.21 | 1404.25 |
| 68.22 | 1473.59 |
| 68.23 | 1369.57 |
| 68.24 | 1369.57 |
| 68.25 | 1317.56 |
| 68.26 | 1352.24 |
| 68.27 | 1404.25 |
| 68.28 | 1282.89 |
| 68.29 | 1092.19 |
| 68.3  | 1456.26 |
| 68.31 | 1490.93 |
| 68.32 | 1404.25 |
| 68.33 | 1022.85 |
| 68.34 | 1386.91 |
| 68.35 | 1386.91 |
| 68.36 | 1352.24 |
| 68.37 | 1230.88 |
| 68.38 | 1352.24 |
| 68.39 | 1508.26 |
| 68.4  | 1473.59 |
| 68.41 | 1560.27 |
| 68.42 | 1074.85 |
| 68.43 | 1386.91 |
| 68.44 | 1404.25 |
| 68.45 | 1612.28 |
| 68.46 | 1560.27 |
| 68.47 | 1092.19 |
| 68.48 | 1230.88 |
| 68.49 | 1473.59 |

|       |         |
|-------|---------|
| 68.5  | 1542.94 |
| 68.51 | 1473.59 |
| 68.52 | 1577.61 |
| 68.53 | 1334.9  |
| 68.54 | 1282.89 |
| 68.55 | 1248.22 |
| 68.56 | 1421.58 |
| 68.57 | 1196.21 |
| 68.58 | 1144.2  |
| 68.59 | 1525.6  |
| 68.6  | 1369.57 |
| 68.61 | 1456.26 |
| 68.62 | 1178.87 |
| 68.63 | 1230.88 |
| 68.64 | 1161.54 |
| 68.65 | 1369.57 |
| 68.66 | 1317.56 |
| 68.67 | 1404.25 |
| 68.68 | 1161.54 |
| 68.69 | 1369.57 |
| 68.7  | 1248.22 |
| 68.71 | 1369.57 |
| 68.72 | 1213.55 |
| 68.73 | 1560.27 |
| 68.74 | 1386.91 |
| 68.75 | 1300.23 |
| 68.76 | 1317.56 |
| 68.77 | 1178.87 |
| 68.78 | 1508.26 |
| 68.79 | 1560.27 |
| 68.8  | 1404.25 |
| 68.81 | 1282.89 |
| 68.82 | 1404.25 |
| 68.83 | 1196.21 |
| 68.84 | 1525.6  |
| 68.85 | 1369.57 |
| 68.86 | 1265.56 |
| 68.87 | 1473.59 |
| 68.88 | 1404.25 |
| 68.89 | 1300.23 |
| 68.9  | 1265.56 |
| 68.91 | 1265.56 |
| 68.92 | 1560.27 |
| 68.93 | 1213.55 |

|       |         |
|-------|---------|
| 68.94 | 1109.53 |
| 68.95 | 1300.23 |
| 68.96 | 1421.58 |
| 68.97 | 1473.59 |
| 68.98 | 1612.28 |
| 68.99 | 1369.57 |
| 69    | 1612.28 |
| 69.01 | 1438.92 |
| 69.02 | 1750.97 |
| 69.03 | 1629.62 |
| 69.04 | 1612.28 |
| 69.05 | 1473.59 |
| 69.06 | 1525.6  |
| 69.07 | 1594.95 |
| 69.08 | 1282.89 |
| 69.09 | 1560.27 |
| 69.1  | 1560.27 |
| 69.11 | 1438.92 |
| 69.12 | 1560.27 |
| 69.13 | 1594.95 |
| 69.14 | 1750.97 |
| 69.15 | 1542.94 |
| 69.16 | 1768.31 |
| 69.17 | 1750.97 |
| 69.18 | 1976.35 |
| 69.19 | 1785.65 |
| 69.2  | 1785.65 |
| 69.21 | 1802.98 |
| 69.22 | 1872.33 |
| 69.23 | 2045.69 |
| 69.24 | 2097.7  |
| 69.25 | 2097.7  |
| 69.26 | 1976.35 |
| 69.27 | 2080.36 |
| 69.28 | 2201.72 |
| 69.29 | 2357.75 |
| 69.3  | 2201.72 |
| 69.31 | 2236.39 |
| 69.32 | 2461.76 |
| 69.33 | 2392.42 |
| 69.34 | 2357.75 |
| 69.35 | 2357.75 |
| 69.36 | 2149.71 |
| 69.37 | 2253.73 |



|       |         |
|-------|---------|
| 69.38 | 1820.32 |
| 69.39 | 2392.42 |
| 69.4  | 2149.71 |
| 69.41 | 2201.72 |
| 69.42 | 1993.68 |
| 69.43 | 2097.7  |
| 69.44 | 1802.98 |
| 69.45 | 2063.03 |
| 69.46 | 2028.36 |
| 69.47 | 2045.69 |
| 69.48 | 1907    |
| 69.49 | 1768.31 |
| 69.5  | 2236.39 |
| 69.51 | 2028.36 |
| 69.52 | 2080.36 |
| 69.53 | 2132.37 |
| 69.54 | 1872.33 |
| 69.55 | 1594.95 |
| 69.56 | 1542.94 |
| 69.57 | 1664.29 |
| 69.58 | 1664.29 |
| 69.59 | 1907    |
| 69.6  | 1612.28 |
| 69.61 | 1629.62 |
| 69.62 | 1768.31 |
| 69.63 | 1438.92 |
| 69.64 | 1629.62 |
| 69.65 | 1525.6  |
| 69.66 | 1785.65 |
| 69.67 | 1750.97 |
| 69.68 | 1542.94 |
| 69.69 | 1612.28 |
| 69.7  | 1265.56 |
| 69.71 | 1560.27 |
| 69.72 | 1490.93 |
| 69.73 | 1646.96 |
| 69.74 | 1456.26 |
| 69.75 | 1456.26 |
| 69.76 | 1733.64 |
| 69.77 | 1490.93 |
| 69.78 | 1490.93 |
| 69.79 | 1577.61 |
| 69.8  | 1248.22 |
| 69.81 | 1386.91 |

|       |         |
|-------|---------|
| 69.82 | 1490.93 |
| 69.83 | 1386.91 |
| 69.84 | 1542.94 |
| 69.85 | 1352.24 |
| 69.86 | 1577.61 |
| 69.87 | 1525.6  |
| 69.88 | 1404.25 |
| 69.89 | 1404.25 |
| 69.9  | 1334.9  |
| 69.91 | 1542.94 |
| 69.92 | 1646.96 |
| 69.93 | 1577.61 |
| 69.94 | 1317.56 |
| 69.95 | 1681.63 |
| 69.96 | 1785.65 |
| 69.97 | 1750.97 |
| 69.98 | 1594.95 |
| 69.99 | 1854.99 |
| 70    | 1768.31 |
| 70.01 | 1473.59 |
| 70.02 | 1612.28 |
| 70.03 | 1698.96 |
| 70.04 | 1542.94 |
| 70.05 | 1750.97 |
| 70.06 | 2045.69 |
| 70.07 | 1785.65 |
| 70.08 | 1750.97 |
| 70.09 | 1733.64 |
| 70.1  | 1664.29 |
| 70.11 | 1733.64 |
| 70.12 | 1664.29 |
| 70.13 | 1959.01 |
| 70.14 | 1646.96 |
| 70.15 | 1768.31 |
| 70.16 | 2028.36 |
| 70.17 | 2028.36 |
| 70.18 | 2097.7  |
| 70.19 | 1959.01 |
| 70.2  | 2011.02 |
| 70.21 | 2080.36 |
| 70.22 | 1941.67 |
| 70.23 | 2184.38 |
| 70.24 | 2392.42 |
| 70.25 | 2357.75 |

|       |         |
|-------|---------|
| 70.26 | 2583.12 |
| 70.27 | 2704.47 |
| 70.28 | 2583.12 |
| 70.29 | 2756.48 |
| 70.3  | 2964.52 |
| 70.31 | 2912.51 |
| 70.32 | 2825.83 |
| 70.33 | 3276.57 |
| 70.34 | 2947.18 |
| 70.35 | 2583.12 |
| 70.36 | 2791.16 |
| 70.37 | 2791.16 |
| 70.38 | 3051.2  |
| 70.39 | 3224.56 |
| 70.4  | 2877.84 |
| 70.41 | 2652.46 |
| 70.42 | 3016.53 |
| 70.43 | 2513.77 |
| 70.44 | 2565.78 |
| 70.45 | 2583.12 |
| 70.46 | 2791.16 |
| 70.47 | 2461.76 |
| 70.48 | 2600.46 |
| 70.49 | 2461.76 |
| 70.5  | 2652.46 |
| 70.51 | 2427.09 |
| 70.52 | 2600.46 |
| 70.53 | 2479.1  |
| 70.54 | 2548.45 |
| 70.55 | 2115.04 |
| 70.56 | 2531.11 |
| 70.57 | 2531.11 |
| 70.58 | 2045.69 |
| 70.59 | 2461.76 |
| 70.6  | 2063.03 |
| 70.61 | 2496.44 |
| 70.62 | 2045.69 |
| 70.63 | 1837.66 |
| 70.64 | 2063.03 |
| 70.65 | 2115.04 |
| 70.66 | 2063.03 |
| 70.67 | 2080.36 |
| 70.68 | 1959.01 |
| 70.69 | 1854.99 |

|       |         |
|-------|---------|
| 70.7  | 1959.01 |
| 70.71 | 1612.28 |
| 70.72 | 1854.99 |
| 70.73 | 1612.28 |
| 70.74 | 1594.95 |
| 70.75 | 1629.62 |
| 70.76 | 1248.22 |
| 70.77 | 1525.6  |
| 70.78 | 1681.63 |
| 70.79 | 1629.62 |
| 70.8  | 1438.92 |
| 70.81 | 1196.21 |
| 70.82 | 1716.3  |
| 70.83 | 1750.97 |
| 70.84 | 1542.94 |
| 70.85 | 1629.62 |
| 70.86 | 1525.6  |
| 70.87 | 1872.33 |
| 70.88 | 1646.96 |
| 70.89 | 1282.89 |
| 70.9  | 1109.53 |
| 70.91 | 1594.95 |
| 70.92 | 1612.28 |
| 70.93 | 1560.27 |
| 70.94 | 1681.63 |
| 70.95 | 1196.21 |
| 70.96 | 1230.88 |
| 70.97 | 1369.57 |
| 70.98 | 1560.27 |
| 70.99 | 1248.22 |
| 71    | 1282.89 |
| 71.01 | 1282.89 |
| 71.02 | 1317.56 |
| 71.03 | 1369.57 |
| 71.04 | 1248.22 |
| 71.05 | 1352.24 |
| 71.06 | 1300.23 |
| 71.07 | 1421.58 |
| 71.08 | 1438.92 |
| 71.09 | 1542.94 |
| 71.1  | 1248.22 |
| 71.11 | 1300.23 |
| 71.12 | 1196.21 |
| 71.13 | 1560.27 |

|       |         |
|-------|---------|
| 71.14 | 1109.53 |
| 71.15 | 1386.91 |
| 71.16 | 1334.9  |
| 71.17 | 1594.95 |
| 71.18 | 1508.26 |
| 71.19 | 1404.25 |
| 71.2  | 1334.9  |
| 71.21 | 1074.85 |
| 71.22 | 1300.23 |
| 71.23 | 1525.6  |
| 71.24 | 1456.26 |
| 71.25 | 1126.86 |
| 71.26 | 1317.56 |
| 71.27 | 1265.56 |
| 71.28 | 1213.55 |
| 71.29 | 1213.55 |
| 71.3  | 1334.9  |
| 71.31 | 1265.56 |
| 71.32 | 1334.9  |
| 71.33 | 1282.89 |
| 71.34 | 1230.88 |
| 71.35 | 1473.59 |
| 71.36 | 1386.91 |
| 71.37 | 1074.85 |
| 71.38 | 1282.89 |
| 71.39 | 1386.91 |
| 71.4  | 1334.9  |
| 71.41 | 1352.24 |
| 71.42 | 1352.24 |
| 71.43 | 1074.85 |
| 71.44 | 1040.18 |
| 71.45 | 1092.19 |
| 71.46 | 1300.23 |
| 71.47 | 1213.55 |
| 71.48 | 1386.91 |
| 71.49 | 1248.22 |
| 71.5  | 1300.23 |
| 71.51 | 1161.54 |
| 71.52 | 1438.92 |
| 71.53 | 1248.22 |
| 71.54 | 1178.87 |
| 71.55 | 1317.56 |
| 71.56 | 1022.85 |
| 71.57 | 1161.54 |

|       |         |
|-------|---------|
| 71.58 | 1421.58 |
| 71.59 | 1196.21 |
| 71.6  | 1248.22 |
| 71.61 | 1022.85 |
| 71.62 | 1421.58 |
| 71.63 | 1369.57 |
| 71.64 | 1109.53 |
| 71.65 | 1473.59 |
| 71.66 | 1282.89 |
| 71.67 | 1473.59 |
| 71.68 | 1196.21 |
| 71.69 | 1144.2  |
| 71.7  | 1248.22 |
| 71.71 | 1248.22 |
| 71.72 | 1577.61 |
| 71.73 | 1300.23 |
| 71.74 | 1317.56 |
| 71.75 | 1022.85 |
| 71.76 | 814.809 |
| 71.77 | 1126.86 |
| 71.78 | 936.164 |
| 71.79 | 1178.87 |
| 71.8  | 1196.21 |
| 71.81 | 1126.86 |
| 71.82 | 1178.87 |
| 71.83 | 1352.24 |
| 71.84 | 1213.55 |
| 71.85 | 1178.87 |
| 71.86 | 1022.85 |
| 71.87 | 1282.89 |
| 71.88 | 1473.59 |
| 71.89 | 970.837 |
| 71.9  | 1161.54 |
| 71.91 | 1421.58 |
| 71.92 | 1074.85 |
| 71.93 | 1040.18 |
| 71.94 | 1265.56 |
| 71.95 | 1022.85 |
| 71.96 | 1265.56 |
| 71.97 | 1317.56 |
| 71.98 | 1300.23 |
| 71.99 | 1057.52 |
| 72    | 1092.19 |
| 72.01 | 1005.51 |

|       |         |
|-------|---------|
| 72.02 | 1230.88 |
| 72.03 | 1126.86 |
| 72.04 | 1144.2  |
| 72.05 | 1525.6  |
| 72.06 | 1248.22 |
| 72.07 | 1126.86 |
| 72.08 | 1490.93 |
| 72.09 | 1525.6  |
| 72.1  | 1074.85 |
| 72.11 | 1213.55 |
| 72.12 | 1248.22 |
| 72.13 | 1196.21 |
| 72.14 | 1213.55 |
| 72.15 | 1352.24 |
| 72.16 | 1473.59 |
| 72.17 | 1473.59 |
| 72.18 | 1092.19 |
| 72.19 | 1109.53 |
| 72.2  | 1404.25 |
| 72.21 | 1213.55 |
| 72.22 | 1265.56 |
| 72.23 | 1213.55 |
| 72.24 | 1196.21 |
| 72.25 | 1230.88 |
| 72.26 | 1352.24 |
| 72.27 | 1317.56 |
| 72.28 | 1022.85 |
| 72.29 | 1594.95 |
| 72.3  | 1282.89 |
| 72.31 | 1230.88 |
| 72.32 | 1126.86 |
| 72.33 | 1057.52 |
| 72.34 | 1178.87 |
| 72.35 | 1352.24 |
| 72.36 | 1369.57 |
| 72.37 | 1369.57 |
| 72.38 | 1300.23 |
| 72.39 | 1248.22 |
| 72.4  | 1317.56 |
| 72.41 | 1352.24 |
| 72.42 | 1386.91 |
| 72.43 | 1092.19 |
| 72.44 | 1196.21 |
| 72.45 | 1768.31 |

|       |         |
|-------|---------|
| 72.46 | 1421.58 |
| 72.47 | 1230.88 |
| 72.48 | 1490.93 |
| 72.49 | 1248.22 |
| 72.5  | 1386.91 |
| 72.51 | 1196.21 |
| 72.52 | 1040.18 |
| 72.53 | 970.837 |
| 72.54 | 1109.53 |
| 72.55 | 1265.56 |
| 72.56 | 1542.94 |
| 72.57 | 1265.56 |
| 72.58 | 1490.93 |
| 72.59 | 1404.25 |
| 72.6  | 1438.92 |
| 72.61 | 1473.59 |
| 72.62 | 1386.91 |
| 72.63 | 1438.92 |
| 72.64 | 1577.61 |
| 72.65 | 1421.58 |
| 72.66 | 1490.93 |
| 72.67 | 1750.97 |
| 72.68 | 1542.94 |
| 72.69 | 1681.63 |
| 72.7  | 1629.62 |
| 72.71 | 1733.64 |
| 72.72 | 1664.29 |
| 72.73 | 1525.6  |
| 72.74 | 1941.67 |
| 72.75 | 1698.96 |
| 72.76 | 1664.29 |
| 72.77 | 1594.95 |
| 72.78 | 1941.67 |
| 72.79 | 1837.66 |
| 72.8  | 2028.36 |
| 72.81 | 2132.37 |
| 72.82 | 1924.34 |
| 72.83 | 2011.02 |
| 72.84 | 2253.73 |
| 72.85 | 2167.05 |
| 72.86 | 2271.06 |
| 72.87 | 2773.82 |
| 72.88 | 2548.45 |
| 72.89 | 2687.14 |



|       |         |
|-------|---------|
| 72.9  | 3068.54 |
| 72.91 | 2877.84 |
| 72.92 | 2773.82 |
| 72.93 | 2635.13 |
| 72.94 | 2791.16 |
| 72.95 | 2912.51 |
| 72.96 | 3432.6  |
| 72.97 | 3380.59 |
| 72.98 | 3172.56 |
| 72.99 | 3207.23 |
| 73    | 3623.3  |
| 73.01 | 3918.02 |
| 73.02 | 3675.31 |
| 73.03 | 3484.61 |
| 73.04 | 3033.86 |
| 73.05 | 3293.91 |
| 73.06 | 3432.6  |
| 73.07 | 3016.53 |
| 73.08 | 3189.89 |
| 73.09 | 3085.87 |
| 73.1  | 3467.27 |
| 73.11 | 2947.18 |
| 73.12 | 2981.86 |
| 73.13 | 2825.83 |
| 73.14 | 2999.19 |
| 73.15 | 2860.5  |
| 73.16 | 2721.81 |
| 73.17 | 2912.51 |
| 73.18 | 2739.15 |
| 73.19 | 2513.77 |
| 73.2  | 2548.45 |
| 73.21 | 3016.53 |
| 73.22 | 2669.8  |
| 73.23 | 2773.82 |
| 73.24 | 2791.16 |
| 73.25 | 2617.79 |
| 73.26 | 2617.79 |
| 73.27 | 2600.46 |
| 73.28 | 2721.81 |
| 73.29 | 2444.43 |
| 73.3  | 2201.72 |
| 73.31 | 2531.11 |
| 73.32 | 2149.71 |
| 73.33 | 2132.37 |

|       |         |
|-------|---------|
| 73.34 | 1889.66 |
| 73.35 | 2305.74 |
| 73.36 | 1889.66 |
| 73.37 | 1612.28 |
| 73.38 | 2028.36 |
| 73.39 | 2063.03 |
| 73.4  | 1959.01 |
| 73.41 | 1733.64 |
| 73.42 | 1802.98 |
| 73.43 | 1612.28 |
| 73.44 | 1802.98 |
| 73.45 | 1854.99 |
| 73.46 | 1733.64 |
| 73.47 | 1733.64 |
| 73.48 | 1716.3  |
| 73.49 | 1508.26 |
| 73.5  | 1854.99 |
| 73.51 | 1716.3  |
| 73.52 | 1490.93 |
| 73.53 | 1577.61 |
| 73.54 | 1681.63 |
| 73.55 | 1629.62 |
| 73.56 | 1421.58 |
| 73.57 | 1698.96 |
| 73.58 | 1681.63 |
| 73.59 | 1959.01 |
| 73.6  | 1542.94 |
| 73.61 | 1525.6  |
| 73.62 | 1612.28 |
| 73.63 | 1802.98 |
| 73.64 | 1629.62 |
| 73.65 | 1681.63 |
| 73.66 | 1924.34 |
| 73.67 | 1924.34 |
| 73.68 | 1976.35 |
| 73.69 | 1959.01 |
| 73.7  | 1802.98 |
| 73.71 | 1907    |
| 73.72 | 1681.63 |
| 73.73 | 2132.37 |
| 73.74 | 1716.3  |
| 73.75 | 1993.68 |
| 73.76 | 1750.97 |
| 73.77 | 1993.68 |

|       |         |
|-------|---------|
| 73.78 | 1612.28 |
| 73.79 | 1959.01 |
| 73.8  | 2045.69 |
| 73.81 | 1837.66 |
| 73.82 | 1872.33 |
| 73.83 | 1889.66 |
| 73.84 | 1681.63 |
| 73.85 | 1698.96 |
| 73.86 | 1733.64 |
| 73.87 | 1716.3  |
| 73.88 | 1837.66 |
| 73.89 | 1542.94 |
| 73.9  | 1438.92 |
| 73.91 | 1369.57 |
| 73.92 | 1438.92 |
| 73.93 | 1664.29 |
| 73.94 | 1508.26 |
| 73.95 | 1542.94 |
| 73.96 | 1629.62 |
| 73.97 | 1473.59 |
| 73.98 | 1733.64 |
| 73.99 | 1681.63 |
| 74    | 1664.29 |
| 74.01 | 1629.62 |
| 74.02 | 1802.98 |
| 74.03 | 1768.31 |
| 74.04 | 1733.64 |
| 74.05 | 1594.95 |
| 74.06 | 1750.97 |
| 74.07 | 1456.26 |
| 74.08 | 1369.57 |
| 74.09 | 1421.58 |
| 74.1  | 1490.93 |
| 74.11 | 1525.6  |
| 74.12 | 1404.25 |
| 74.13 | 1594.95 |
| 74.14 | 1629.62 |
| 74.15 | 1369.57 |
| 74.16 | 1664.29 |
| 74.17 | 1490.93 |
| 74.18 | 1508.26 |
| 74.19 | 1386.91 |
| 74.2  | 1438.92 |
| 74.21 | 1317.56 |

|       |         |
|-------|---------|
| 74.22 | 1230.88 |
| 74.23 | 1404.25 |
| 74.24 | 1421.58 |
| 74.25 | 1334.9  |
| 74.26 | 1161.54 |
| 74.27 | 1421.58 |
| 74.28 | 1317.56 |
| 74.29 | 1300.23 |
| 74.3  | 1230.88 |
| 74.31 | 1213.55 |
| 74.32 | 1265.56 |
| 74.33 | 1508.26 |
| 74.34 | 1542.94 |
| 74.35 | 1057.52 |
| 74.36 | 1126.86 |
| 74.37 | 1577.61 |
| 74.38 | 1265.56 |
| 74.39 | 1109.53 |
| 74.4  | 1213.55 |
| 74.41 | 1369.57 |
| 74.42 | 1352.24 |
| 74.43 | 1178.87 |
| 74.44 | 1334.9  |
| 74.45 | 1404.25 |
| 74.46 | 1282.89 |
| 74.47 | 1386.91 |
| 74.48 | 1334.9  |
| 74.49 | 1248.22 |
| 74.5  | 1126.86 |
| 74.51 | 1282.89 |
| 74.52 | 1248.22 |
| 74.53 | 1317.56 |
| 74.54 | 1265.56 |
| 74.55 | 1282.89 |
| 74.56 | 1144.2  |
| 74.57 | 1230.88 |
| 74.58 | 1317.56 |
| 74.59 | 1300.23 |
| 74.6  | 1438.92 |
| 74.61 | 1248.22 |
| 74.62 | 1196.21 |
| 74.63 | 1369.57 |
| 74.64 | 1092.19 |
| 74.65 | 1022.85 |

|       |         |
|-------|---------|
| 74.66 | 1213.55 |
| 74.67 | 1109.53 |
| 74.68 | 1074.85 |
| 74.69 | 1213.55 |
| 74.7  | 1317.56 |
| 74.71 | 1126.86 |
| 74.72 | 1369.57 |
| 74.73 | 936.164 |
| 74.74 | 1022.85 |
| 74.75 | 988.173 |
| 74.76 | 1352.24 |
| 74.77 | 1074.85 |
| 74.78 | 1334.9  |
| 74.79 | 1092.19 |
| 74.8  | 1178.87 |
| 74.81 | 866.819 |
| 74.82 | 1178.87 |
| 74.83 | 1300.23 |
| 74.84 | 1092.19 |
| 74.85 | 1022.85 |
| 74.86 | 1161.54 |
| 74.87 | 1109.53 |
| 74.88 | 1109.53 |
| 74.89 | 1282.89 |
| 74.9  | 1282.89 |
| 74.91 | 1109.53 |
| 74.92 | 1126.86 |
| 74.93 | 1317.56 |
| 74.94 | 1161.54 |
| 74.95 | 1144.2  |
| 74.96 | 1092.19 |
| 74.97 | 1317.56 |
| 74.98 | 1352.24 |
| 74.99 | 1213.55 |
| 75    | 1265.56 |
| 75.01 | 1005.51 |
| 75.02 | 1334.9  |
| 75.03 | 1126.86 |
| 75.04 | 1126.86 |
| 75.05 | 1282.89 |
| 75.06 | 1352.24 |
| 75.07 | 1334.9  |
| 75.08 | 1005.51 |
| 75.09 | 1178.87 |

|       |         |
|-------|---------|
| 75.1  | 1265.56 |
| 75.11 | 1230.88 |
| 75.12 | 1213.55 |
| 75.13 | 1196.21 |
| 75.14 | 1126.86 |
| 75.15 | 1300.23 |
| 75.16 | 1213.55 |
| 75.17 | 1456.26 |
| 75.18 | 1126.86 |
| 75.19 | 1248.22 |
| 75.2  | 1265.56 |
| 75.21 | 1178.87 |
| 75.22 | 1213.55 |
| 75.23 | 1317.56 |
| 75.24 | 1161.54 |
| 75.25 | 1248.22 |
| 75.26 | 1178.87 |
| 75.27 | 1144.2  |
| 75.28 | 1300.23 |
| 75.29 | 1178.87 |
| 75.3  | 1421.58 |
| 75.31 | 1282.89 |
| 75.32 | 1126.86 |
| 75.33 | 1074.85 |
| 75.34 | 1178.87 |
| 75.35 | 1213.55 |
| 75.36 | 1074.85 |
| 75.37 | 1438.92 |
| 75.38 | 1074.85 |
| 75.39 | 1022.85 |
| 75.4  | 832.146 |
| 75.41 | 1144.2  |
| 75.42 | 1092.19 |
| 75.43 | 1161.54 |
| 75.44 | 1144.2  |
| 75.45 | 1334.9  |
| 75.46 | 1248.22 |
| 75.47 | 1230.88 |
| 75.48 | 1074.85 |
| 75.49 | 1265.56 |
| 75.5  | 1438.92 |
| 75.51 | 1092.19 |
| 75.52 | 1040.18 |
| 75.53 | 1352.24 |

|       |         |
|-------|---------|
| 75.54 | 1248.22 |
| 75.55 | 988.173 |
| 75.56 | 1196.21 |
| 75.57 | 1369.57 |
| 75.58 | 1196.21 |
| 75.59 | 1196.21 |
| 75.6  | 1126.86 |
| 75.61 | 1109.53 |
| 75.62 | 1109.53 |
| 75.63 | 1057.52 |
| 75.64 | 1282.89 |
| 75.65 | 1109.53 |
| 75.66 | 1022.85 |
| 75.67 | 1074.85 |
| 75.68 | 1074.85 |
| 75.69 | 1577.61 |
| 75.7  | 1282.89 |
| 75.71 | 1300.23 |
| 75.72 | 1144.2  |
| 75.73 | 1196.21 |
| 75.74 | 1161.54 |
| 75.75 | 1352.24 |
| 75.76 | 1057.52 |
| 75.77 | 1300.23 |
| 75.78 | 1040.18 |
| 75.79 | 1213.55 |
| 75.8  | 1057.52 |
| 75.81 | 1126.86 |
| 75.82 | 1022.85 |
| 75.83 | 1404.25 |
| 75.84 | 1161.54 |
| 75.85 | 884.155 |
| 75.86 | 1109.53 |
| 75.87 | 970.837 |
| 75.88 | 1057.52 |
| 75.89 | 1196.21 |
| 75.9  | 1161.54 |
| 75.91 | 1178.87 |
| 75.92 | 1265.56 |
| 75.93 | 1473.59 |
| 75.94 | 1230.88 |
| 75.95 | 1282.89 |
| 75.96 | 1490.93 |
| 75.97 | 1352.24 |

|       |         |
|-------|---------|
| 75.98 | 1126.86 |
| 75.99 | 1248.22 |
| 76    | 1248.22 |
| 76.01 | 1196.21 |
| 76.02 | 1057.52 |
| 76.03 | 1213.55 |
| 76.04 | 1421.58 |
| 76.05 | 1178.87 |
| 76.06 | 1317.56 |
| 76.07 | 1404.25 |
| 76.08 | 1508.26 |
| 76.09 | 1213.55 |
| 76.1  | 1300.23 |
| 76.11 | 1265.56 |
| 76.12 | 1196.21 |
| 76.13 | 1092.19 |
| 76.14 | 1369.57 |
| 76.15 | 1161.54 |
| 76.16 | 1265.56 |
| 76.17 | 1248.22 |
| 76.18 | 1490.93 |
| 76.19 | 1282.89 |
| 76.2  | 1438.92 |
| 76.21 | 1473.59 |
| 76.22 | 1369.57 |
| 76.23 | 1404.25 |
| 76.24 | 1490.93 |
| 76.25 | 1525.6  |
| 76.26 | 1473.59 |
| 76.27 | 1560.27 |
| 76.28 | 1698.96 |
| 76.29 | 1924.34 |
| 76.3  | 1820.32 |
| 76.31 | 1768.31 |
| 76.32 | 1646.96 |
| 76.33 | 1716.3  |
| 76.34 | 1959.01 |
| 76.35 | 1820.32 |
| 76.36 | 2063.03 |
| 76.37 | 2236.39 |
| 76.38 | 2011.02 |
| 76.39 | 2357.75 |
| 76.4  | 2392.42 |
| 76.41 | 2409.76 |



|       |         |
|-------|---------|
| 76.42 | 1872.33 |
| 76.43 | 1941.67 |
| 76.44 | 2253.73 |
| 76.45 | 1959.01 |
| 76.46 | 2028.36 |
| 76.47 | 1941.67 |
| 76.48 | 1941.67 |
| 76.49 | 1872.33 |
| 76.5  | 2063.03 |
| 76.51 | 1993.68 |
| 76.52 | 1646.96 |
| 76.53 | 1802.98 |
| 76.54 | 1976.35 |
| 76.55 | 2011.02 |
| 76.56 | 1698.96 |
| 76.57 | 1802.98 |
| 76.58 | 1820.32 |
| 76.59 | 2045.69 |
| 76.6  | 1854.99 |
| 76.61 | 1785.65 |
| 76.62 | 2028.36 |
| 76.63 | 1733.64 |
| 76.64 | 1664.29 |
| 76.65 | 1924.34 |
| 76.66 | 1594.95 |
| 76.67 | 1681.63 |
| 76.68 | 1612.28 |
| 76.69 | 1854.99 |
| 76.7  | 1629.62 |
| 76.71 | 1490.93 |
| 76.72 | 1490.93 |
| 76.73 | 1629.62 |
| 76.74 | 1508.26 |
| 76.75 | 1282.89 |
| 76.76 | 1508.26 |
| 76.77 | 1820.32 |
| 76.78 | 1265.56 |
| 76.79 | 1352.24 |
| 76.8  | 1421.58 |
| 76.81 | 1369.57 |
| 76.82 | 1577.61 |
| 76.83 | 1560.27 |
| 76.84 | 1542.94 |
| 76.85 | 1698.96 |

|       |         |
|-------|---------|
| 76.86 | 1560.27 |
| 76.87 | 1352.24 |
| 76.88 | 1664.29 |
| 76.89 | 1473.59 |
| 76.9  | 1334.9  |
| 76.91 | 1334.9  |
| 76.92 | 1473.59 |
| 76.93 | 1508.26 |
| 76.94 | 1508.26 |
| 76.95 | 1386.91 |
| 76.96 | 1560.27 |
| 76.97 | 1629.62 |
| 76.98 | 1508.26 |
| 76.99 | 1698.96 |
| 77    | 1785.65 |
| 77.01 | 2201.72 |
| 77.02 | 1716.3  |
| 77.03 | 1698.96 |
| 77.04 | 1802.98 |
| 77.05 | 1837.66 |
| 77.06 | 1959.01 |
| 77.07 | 1993.68 |
| 77.08 | 2149.71 |
| 77.09 | 2201.72 |
| 77.1  | 2115.04 |
| 77.11 | 2253.73 |
| 77.12 | 2167.05 |
| 77.13 | 2357.75 |
| 77.14 | 2375.08 |
| 77.15 | 2236.39 |
| 77.16 | 2479.1  |
| 77.17 | 2357.75 |
| 77.18 | 2427.09 |
| 77.19 | 2409.76 |
| 77.2  | 2929.85 |
| 77.21 | 2479.1  |
| 77.22 | 2687.14 |
| 77.23 | 2739.15 |
| 77.24 | 2912.51 |
| 77.25 | 3345.92 |
| 77.26 | 3345.92 |
| 77.27 | 2721.81 |
| 77.28 | 2825.83 |
| 77.29 | 2860.5  |

|       |         |
|-------|---------|
| 77.3  | 2843.16 |
| 77.31 | 2773.82 |
| 77.32 | 2825.83 |
| 77.33 | 2895.17 |
| 77.34 | 2756.48 |
| 77.35 | 2219.06 |
| 77.36 | 2687.14 |
| 77.37 | 2531.11 |
| 77.38 | 2444.43 |
| 77.39 | 2635.13 |
| 77.4  | 2548.45 |
| 77.41 | 2305.74 |
| 77.42 | 2253.73 |
| 77.43 | 2548.45 |
| 77.44 | 2392.42 |
| 77.45 | 2323.07 |
| 77.46 | 2427.09 |
| 77.47 | 2496.44 |
| 77.48 | 2583.12 |
| 77.49 | 2357.75 |
| 77.5  | 2357.75 |
| 77.51 | 2548.45 |
| 77.52 | 2097.7  |
| 77.53 | 1941.67 |
| 77.54 | 2149.71 |
| 77.55 | 1907    |
| 77.56 | 2028.36 |
| 77.57 | 1941.67 |
| 77.58 | 1681.63 |
| 77.59 | 1802.98 |
| 77.6  | 1612.28 |
| 77.61 | 1907    |
| 77.62 | 1993.68 |
| 77.63 | 1716.3  |
| 77.64 | 1508.26 |
| 77.65 | 1404.25 |
| 77.66 | 1837.66 |
| 77.67 | 1421.58 |
| 77.68 | 1629.62 |
| 77.69 | 1941.67 |
| 77.7  | 1525.6  |
| 77.71 | 1681.63 |
| 77.72 | 1560.27 |
| 77.73 | 1716.3  |

|       |         |
|-------|---------|
| 77.74 | 1317.56 |
| 77.75 | 1386.91 |
| 77.76 | 1473.59 |
| 77.77 | 1490.93 |
| 77.78 | 1334.9  |
| 77.79 | 1386.91 |
| 77.8  | 1560.27 |
| 77.81 | 1542.94 |
| 77.82 | 1317.56 |
| 77.83 | 1300.23 |
| 77.84 | 1334.9  |
| 77.85 | 1352.24 |
| 77.86 | 1542.94 |
| 77.87 | 1681.63 |
| 77.88 | 1300.23 |
| 77.89 | 1248.22 |
| 77.9  | 1369.57 |
| 77.91 | 1404.25 |
| 77.92 | 1092.19 |
| 77.93 | 1300.23 |
| 77.94 | 1542.94 |
| 77.95 | 1421.58 |
| 77.96 | 1386.91 |
| 77.97 | 1369.57 |
| 77.98 | 1386.91 |
| 77.99 | 1438.92 |
| 78    | 1092.19 |
| 78.01 | 1109.53 |
| 78.02 | 1282.89 |
| 78.03 | 1352.24 |
| 78.04 | 1369.57 |
| 78.05 | 1508.26 |
| 78.06 | 1213.55 |
| 78.07 | 1109.53 |
| 78.08 | 1213.55 |
| 78.09 | 1282.89 |
| 78.1  | 918.828 |
| 78.11 | 1473.59 |
| 78.12 | 1022.85 |
| 78.13 | 1178.87 |
| 78.14 | 1178.87 |
| 78.15 | 1265.56 |
| 78.16 | 1092.19 |
| 78.17 | 1456.26 |

|       |         |
|-------|---------|
| 78.18 | 1230.88 |
| 78.19 | 1144.2  |
| 78.2  | 1092.19 |
| 78.21 | 1473.59 |
| 78.22 | 1213.55 |
| 78.23 | 1213.55 |
| 78.24 | 988.173 |
| 78.25 | 1178.87 |
| 78.26 | 1040.18 |
| 78.27 | 1057.52 |
| 78.28 | 1230.88 |
| 78.29 | 1092.19 |
| 78.3  | 1109.53 |
| 78.31 | 1178.87 |
| 78.32 | 1386.91 |
| 78.33 | 1161.54 |
| 78.34 | 1057.52 |
| 78.35 | 1386.91 |
| 78.36 | 1282.89 |
| 78.37 | 1317.56 |
| 78.38 | 1369.57 |
| 78.39 | 1161.54 |
| 78.4  | 1144.2  |
| 78.41 | 1040.18 |
| 78.42 | 1057.52 |
| 78.43 | 1334.9  |
| 78.44 | 1213.55 |
| 78.45 | 1022.85 |
| 78.46 | 1092.19 |
| 78.47 | 1213.55 |
| 78.48 | 1074.85 |
| 78.49 | 1265.56 |
| 78.5  | 1040.18 |
| 78.51 | 1161.54 |
| 78.52 | 1265.56 |
| 78.53 | 1317.56 |
| 78.54 | 1438.92 |
| 78.55 | 1161.54 |
| 78.56 | 1248.22 |
| 78.57 | 1126.86 |
| 78.58 | 1265.56 |
| 78.59 | 1126.86 |
| 78.6  | 1161.54 |
| 78.61 | 1126.86 |

|       |         |
|-------|---------|
| 78.62 | 1196.21 |
| 78.63 | 1109.53 |
| 78.64 | 1317.56 |
| 78.65 | 988.173 |
| 78.66 | 1196.21 |
| 78.67 | 1300.23 |
| 78.68 | 1248.22 |
| 78.69 | 1144.2  |
| 78.7  | 1126.86 |
| 78.71 | 1040.18 |
| 78.72 | 1022.85 |
| 78.73 | 1144.2  |
| 78.74 | 1334.9  |
| 78.75 | 953.5   |
| 78.76 | 1386.91 |
| 78.77 | 1230.88 |
| 78.78 | 1144.2  |
| 78.79 | 1248.22 |
| 78.8  | 1230.88 |
| 78.81 | 988.173 |
| 78.82 | 1092.19 |
| 78.83 | 1196.21 |
| 78.84 | 1230.88 |
| 78.85 | 1213.55 |
| 78.86 | 1144.2  |
| 78.87 | 1040.18 |
| 78.88 | 1265.56 |
| 78.89 | 988.173 |
| 78.9  | 1265.56 |
| 78.91 | 1074.85 |
| 78.92 | 1248.22 |
| 78.93 | 1282.89 |
| 78.94 | 1005.51 |
| 78.95 | 918.828 |
| 78.96 | 1005.51 |
| 78.97 | 1092.19 |
| 78.98 | 1092.19 |
| 78.99 | 1265.56 |
| 79    | 1109.53 |
| 79.01 | 1057.52 |
| 79.02 | 1022.85 |
| 79.03 | 901.491 |
| 79.04 | 1057.52 |
| 79.05 | 1109.53 |

|       |         |
|-------|---------|
| 79.06 | 1230.88 |
| 79.07 | 1057.52 |
| 79.08 | 1092.19 |
| 79.09 | 1369.57 |
| 79.1  | 1317.56 |
| 79.11 | 1178.87 |
| 79.12 | 1196.21 |
| 79.13 | 1040.18 |
| 79.14 | 1196.21 |
| 79.15 | 1248.22 |
| 79.16 | 936.164 |
| 79.17 | 1300.23 |
| 79.18 | 1040.18 |
| 79.19 | 1040.18 |
| 79.2  | 1317.56 |
| 79.21 | 1074.85 |
| 79.22 | 1178.87 |
| 79.23 | 1092.19 |
| 79.24 | 1317.56 |
| 79.25 | 1040.18 |
| 79.26 | 988.173 |
| 79.27 | 832.146 |
| 79.28 | 1092.19 |
| 79.29 | 1352.24 |
| 79.3  | 1144.2  |
| 79.31 | 1092.19 |
| 79.32 | 1161.54 |
| 79.33 | 1421.58 |
| 79.34 | 1109.53 |
| 79.35 | 1109.53 |
| 79.36 | 1352.24 |
| 79.37 | 1040.18 |
| 79.38 | 1022.85 |
| 79.39 | 1109.53 |
| 79.4  | 1317.56 |
| 79.41 | 1092.19 |
| 79.42 | 1230.88 |
| 79.43 | 1040.18 |
| 79.44 | 1109.53 |
| 79.45 | 953.5   |
| 79.46 | 1126.86 |
| 79.47 | 1074.85 |
| 79.48 | 970.837 |
| 79.49 | 1334.9  |

|       |         |
|-------|---------|
| 79.5  | 1074.85 |
| 79.51 | 918.828 |
| 79.52 | 970.837 |
| 79.53 | 918.828 |
| 79.54 | 1386.91 |
| 79.55 | 1178.87 |
| 79.56 | 1144.2  |
| 79.57 | 1144.2  |
| 79.58 | 970.837 |
| 79.59 | 1178.87 |
| 79.6  | 884.155 |
| 79.61 | 953.5   |
| 79.62 | 1092.19 |
| 79.63 | 970.837 |
| 79.64 | 988.173 |
| 79.65 | 1040.18 |
| 79.66 | 1230.88 |
| 79.67 | 1109.53 |
| 79.68 | 988.173 |
| 79.69 | 1092.19 |
| 79.7  | 901.491 |
| 79.71 | 1213.55 |
| 79.72 | 1144.2  |
| 79.73 | 970.837 |
| 79.74 | 1074.85 |
| 79.75 | 1196.21 |
| 79.76 | 1022.85 |
| 79.77 | 1040.18 |
| 79.78 | 1040.18 |
| 79.79 | 936.164 |
| 79.8  | 1057.52 |
| 79.81 | 970.837 |
| 79.82 | 1057.52 |
| 79.83 | 1022.85 |
| 79.84 | 1178.87 |
| 79.85 | 1404.25 |
| 79.86 | 1126.86 |
| 79.87 | 1074.85 |
| 79.88 | 1074.85 |
| 79.89 | 1057.52 |
| 79.9  | 1144.2  |
| 79.91 | 1161.54 |
| 79.92 | 1178.87 |
| 79.93 | 1196.21 |



|       |         |
|-------|---------|
| 79.94 | 1005.51 |
| 79.95 | 1074.85 |
| 79.96 | 1213.55 |
| 79.97 | 884.155 |
| 79.98 | 1300.23 |
| 79.99 | 1196.21 |
| 80    | 988.173 |
| 80.01 | 1022.85 |
| 80.02 | 953.5   |
| 80.03 | 1109.53 |
| 80.04 | 1040.18 |
| 80.05 | 1248.22 |
| 80.06 | 1213.55 |
| 80.07 | 1265.56 |
| 80.08 | 1109.53 |
| 80.09 | 1022.85 |
| 80.1  | 1161.54 |
| 80.11 | 1022.85 |
| 80.12 | 1074.85 |
| 80.13 | 1040.18 |
| 80.14 | 1248.22 |
| 80.15 | 953.5   |
| 80.16 | 1265.56 |
| 80.17 | 1404.25 |
| 80.18 | 1178.87 |
| 80.19 | 1005.51 |
| 80.2  | 918.828 |
| 80.21 | 936.164 |
| 80.22 | 936.164 |
| 80.23 | 1005.51 |
| 80.24 | 1126.86 |
| 80.25 | 1178.87 |
| 80.26 | 1092.19 |
| 80.27 | 1248.22 |
| 80.28 | 1230.88 |
| 80.29 | 988.173 |
| 80.3  | 1022.85 |
| 80.31 | 1230.88 |
| 80.32 | 1040.18 |
| 80.33 | 1248.22 |
| 80.34 | 1040.18 |
| 80.35 | 1473.59 |
| 80.36 | 1074.85 |
| 80.37 | 1005.51 |

|       |         |
|-------|---------|
| 80.38 | 936.164 |
| 80.39 | 1161.54 |
| 80.4  | 884.155 |
| 80.41 | 1126.86 |
| 80.42 | 1074.85 |
| 80.43 | 1196.21 |
| 80.44 | 936.164 |
| 80.45 | 1144.2  |
| 80.46 | 1144.2  |
| 80.47 | 1126.86 |
| 80.48 | 1074.85 |
| 80.49 | 1282.89 |
| 80.5  | 1126.86 |
| 80.51 | 1213.55 |
| 80.52 | 1196.21 |
| 80.53 | 1265.56 |
| 80.54 | 1057.52 |
| 80.55 | 1074.85 |
| 80.56 | 1161.54 |
| 80.57 | 1092.19 |
| 80.58 | 1144.2  |
| 80.59 | 1230.88 |
| 80.6  | 1022.85 |
| 80.61 | 1057.52 |
| 80.62 | 1092.19 |
| 80.63 | 1057.52 |
| 80.64 | 1126.86 |
| 80.65 | 1126.86 |
| 80.66 | 1040.18 |
| 80.67 | 1334.9  |
| 80.68 | 1386.91 |
| 80.69 | 953.5   |
| 80.7  | 884.155 |
| 80.71 | 1265.56 |
| 80.72 | 1144.2  |
| 80.73 | 1005.51 |
| 80.74 | 918.828 |
| 80.75 | 1161.54 |
| 80.76 | 1161.54 |
| 80.77 | 1161.54 |
| 80.78 | 1421.58 |
| 80.79 | 1421.58 |
| 80.8  | 1369.57 |
| 80.81 | 1109.53 |

|       |         |
|-------|---------|
| 80.82 | 1317.56 |
| 80.83 | 1594.95 |
| 80.84 | 1196.21 |
| 80.85 | 1213.55 |
| 80.86 | 1248.22 |
| 80.87 | 1109.53 |
| 80.88 | 1248.22 |
| 80.89 | 1178.87 |
| 80.9  | 1404.25 |
| 80.91 | 1230.88 |
| 80.92 | 1508.26 |
| 80.93 | 1577.61 |
| 80.94 | 1022.85 |
| 80.95 | 1438.92 |
| 80.96 | 1126.86 |
| 80.97 | 1282.89 |
| 80.98 | 1369.57 |
| 80.99 | 1612.28 |
| 81    | 1490.93 |
| 81.01 | 1490.93 |
| 81.02 | 1490.93 |
| 81.03 | 1577.61 |
| 81.04 | 1560.27 |
| 81.05 | 1681.63 |
| 81.06 | 1508.26 |
| 81.07 | 1508.26 |
| 81.08 | 1456.26 |
| 81.09 | 1473.59 |
| 81.1  | 1490.93 |
| 81.11 | 1664.29 |
| 81.12 | 1664.29 |
| 81.13 | 1525.6  |
| 81.14 | 1438.92 |
| 81.15 | 1577.61 |
| 81.16 | 1421.58 |
| 81.17 | 1542.94 |
| 81.18 | 1473.59 |
| 81.19 | 1976.35 |
| 81.2  | 1646.96 |
| 81.21 | 1525.6  |
| 81.22 | 1646.96 |
| 81.23 | 1612.28 |
| 81.24 | 1334.9  |
| 81.25 | 1369.57 |

|       |         |
|-------|---------|
| 81.26 | 1490.93 |
| 81.27 | 1490.93 |
| 81.28 | 1681.63 |
| 81.29 | 1508.26 |
| 81.3  | 1698.96 |
| 81.31 | 1907    |
| 81.32 | 1733.64 |
| 81.33 | 1716.3  |
| 81.34 | 1750.97 |
| 81.35 | 1612.28 |
| 81.36 | 1750.97 |
| 81.37 | 1525.6  |
| 81.38 | 1785.65 |
| 81.39 | 1854.99 |
| 81.4  | 1785.65 |
| 81.41 | 1907    |
| 81.42 | 1716.3  |
| 81.43 | 1802.98 |
| 81.44 | 1733.64 |
| 81.45 | 2097.7  |
| 81.46 | 2132.37 |
| 81.47 | 1820.32 |
| 81.48 | 2271.06 |
| 81.49 | 2149.71 |
| 81.5  | 2080.36 |
| 81.51 | 2219.06 |
| 81.52 | 2253.73 |
| 81.53 | 2895.17 |
| 81.54 | 2687.14 |
| 81.55 | 2739.15 |
| 81.56 | 2739.15 |
| 81.57 | 2600.46 |
| 81.58 | 2496.44 |
| 81.59 | 2947.18 |
| 81.6  | 2461.76 |
| 81.61 | 3241.9  |
| 81.62 | 2929.85 |
| 81.63 | 3224.56 |
| 81.64 | 3016.53 |
| 81.65 | 2669.8  |
| 81.66 | 3155.22 |
| 81.67 | 2669.8  |
| 81.68 | 2617.79 |
| 81.69 | 2843.16 |

|       |         |
|-------|---------|
| 81.7  | 2479.1  |
| 81.71 | 2912.51 |
| 81.72 | 2548.45 |
| 81.73 | 2704.47 |
| 81.74 | 2496.44 |
| 81.75 | 2513.77 |
| 81.76 | 2548.45 |
| 81.77 | 2652.46 |
| 81.78 | 2565.78 |
| 81.79 | 2149.71 |
| 81.8  | 2409.76 |
| 81.81 | 2513.77 |
| 81.82 | 2201.72 |
| 81.83 | 2444.43 |
| 81.84 | 2565.78 |
| 81.85 | 2773.82 |
| 81.86 | 2427.09 |
| 81.87 | 2097.7  |
| 81.88 | 2583.12 |
| 81.89 | 2461.76 |
| 81.9  | 2461.76 |
| 81.91 | 2652.46 |
| 81.92 | 2063.03 |
| 81.93 | 2340.41 |
| 81.94 | 2427.09 |
| 81.95 | 2253.73 |
| 81.96 | 2427.09 |
| 81.97 | 2011.02 |
| 81.98 | 2323.07 |
| 81.99 | 1976.35 |
| 82    | 1698.96 |
| 82.01 | 1768.31 |
| 82.02 | 1785.65 |
| 82.03 | 1959.01 |
| 82.04 | 2011.02 |
| 82.05 | 1785.65 |
| 82.06 | 1820.32 |
| 82.07 | 1872.33 |
| 82.08 | 1941.67 |
| 82.09 | 2063.03 |
| 82.1  | 1577.61 |
| 82.11 | 1907    |
| 82.12 | 1733.64 |
| 82.13 | 1542.94 |

|       |         |
|-------|---------|
| 82.14 | 1750.97 |
| 82.15 | 1716.3  |
| 82.16 | 1924.34 |
| 82.17 | 1317.56 |
| 82.18 | 1508.26 |
| 82.19 | 1716.3  |
| 82.2  | 1629.62 |
| 82.21 | 1733.64 |
| 82.22 | 1612.28 |
| 82.23 | 1542.94 |
| 82.24 | 1629.62 |
| 82.25 | 1664.29 |
| 82.26 | 1664.29 |
| 82.27 | 1750.97 |
| 82.28 | 1941.67 |
| 82.29 | 1750.97 |
| 82.3  | 1646.96 |
| 82.31 | 1369.57 |
| 82.32 | 1369.57 |
| 82.33 | 1508.26 |
| 82.34 | 1612.28 |
| 82.35 | 1508.26 |
| 82.36 | 1473.59 |
| 82.37 | 1386.91 |
| 82.38 | 1317.56 |
| 82.39 | 1421.58 |
| 82.4  | 1369.57 |
| 82.41 | 1490.93 |
| 82.42 | 1508.26 |
| 82.43 | 1248.22 |
| 82.44 | 1577.61 |
| 82.45 | 1438.92 |
| 82.46 | 1369.57 |
| 82.47 | 1334.9  |
| 82.48 | 1334.9  |
| 82.49 | 1369.57 |
| 82.5  | 1456.26 |
| 82.51 | 1594.95 |
| 82.52 | 1525.6  |
| 82.53 | 1282.89 |
| 82.54 | 1282.89 |
| 82.55 | 1144.2  |
| 82.56 | 1456.26 |
| 82.57 | 1109.53 |

|       |         |
|-------|---------|
| 82.58 | 1542.94 |
| 82.59 | 1282.89 |
| 82.6  | 1334.9  |
| 82.61 | 988.173 |
| 82.62 | 1334.9  |
| 82.63 | 1386.91 |
| 82.64 | 1352.24 |
| 82.65 | 1594.95 |
| 82.66 | 1386.91 |
| 82.67 | 1265.56 |
| 82.68 | 1109.53 |
| 82.69 | 1282.89 |
| 82.7  | 1144.2  |
| 82.71 | 1265.56 |
| 82.72 | 1213.55 |
| 82.73 | 1196.21 |
| 82.74 | 1109.53 |
| 82.75 | 1040.18 |
| 82.76 | 1300.23 |
| 82.77 | 1352.24 |
| 82.78 | 1334.9  |
| 82.79 | 1300.23 |
| 82.8  | 1126.86 |
| 82.81 | 1161.54 |
| 82.82 | 1057.52 |
| 82.83 | 1196.21 |
| 82.84 | 1473.59 |
| 82.85 | 1369.57 |
| 82.86 | 1196.21 |
| 82.87 | 1074.85 |
| 82.88 | 1196.21 |
| 82.89 | 1178.87 |
| 82.9  | 1317.56 |
| 82.91 | 1196.21 |
| 82.92 | 1161.54 |
| 82.93 | 1248.22 |
| 82.94 | 1144.2  |
| 82.95 | 1230.88 |
| 82.96 | 1282.89 |
| 82.97 | 1161.54 |
| 82.98 | 1248.22 |
| 82.99 | 1022.85 |
| 83    | 1005.51 |
| 83.01 | 1005.51 |

|       |         |
|-------|---------|
| 83.02 | 1230.88 |
| 83.03 | 1317.56 |
| 83.04 | 1300.23 |
| 83.05 | 1161.54 |
| 83.06 | 1005.51 |
| 83.07 | 1057.52 |
| 83.08 | 1092.19 |
| 83.09 | 1300.23 |
| 83.1  | 1404.25 |
| 83.11 | 1317.56 |
| 83.12 | 1230.88 |
| 83.13 | 1109.53 |
| 83.14 | 1092.19 |
| 83.15 | 1300.23 |
| 83.16 | 1282.89 |
| 83.17 | 1213.55 |
| 83.18 | 1248.22 |
| 83.19 | 1248.22 |
| 83.2  | 1092.19 |
| 83.21 | 1057.52 |
| 83.22 | 1092.19 |
| 83.23 | 1109.53 |
| 83.24 | 1265.56 |
| 83.25 | 1248.22 |
| 83.26 | 1022.85 |
| 83.27 | 1213.55 |
| 83.28 | 1144.2  |
| 83.29 | 1490.93 |
| 83.3  | 1421.58 |
| 83.31 | 1248.22 |
| 83.32 | 1265.56 |
| 83.33 | 1040.18 |
| 83.34 | 1196.21 |
| 83.35 | 1456.26 |
| 83.36 | 1230.88 |
| 83.37 | 1248.22 |
| 83.38 | 1178.87 |
| 83.39 | 1317.56 |
| 83.4  | 1508.26 |
| 83.41 | 1490.93 |
| 83.42 | 1334.9  |
| 83.43 | 1334.9  |
| 83.44 | 1317.56 |
| 83.45 | 1386.91 |



|       |         |
|-------|---------|
| 83.46 | 1716.3  |
| 83.47 | 1317.56 |
| 83.48 | 1438.92 |
| 83.49 | 1334.9  |
| 83.5  | 1334.9  |
| 83.51 | 1508.26 |
| 83.52 | 1265.56 |
| 83.53 | 1404.25 |
| 83.54 | 1508.26 |
| 83.55 | 1508.26 |
| 83.56 | 1594.95 |
| 83.57 | 1594.95 |
| 83.58 | 1508.26 |
| 83.59 | 1473.59 |
| 83.6  | 1854.99 |
| 83.61 | 1733.64 |
| 83.62 | 1664.29 |
| 83.63 | 1577.61 |
| 83.64 | 1907    |
| 83.65 | 1872.33 |
| 83.66 | 1976.35 |
| 83.67 | 1525.6  |
| 83.68 | 1941.67 |
| 83.69 | 2409.76 |
| 83.7  | 2219.06 |
| 83.71 | 2097.7  |
| 83.72 | 1993.68 |
| 83.73 | 2409.76 |
| 83.74 | 2652.46 |
| 83.75 | 2461.76 |
| 83.76 | 2635.13 |
| 83.77 | 2583.12 |
| 83.78 | 3207.23 |
| 83.79 | 3172.56 |
| 83.8  | 3484.61 |
| 83.81 | 3345.92 |
| 83.82 | 3484.61 |
| 83.83 | 3380.59 |
| 83.84 | 3692.65 |
| 83.85 | 3605.97 |
| 83.86 | 3761.99 |
| 83.87 | 3883.35 |
| 83.88 | 3831.34 |
| 83.89 | 3467.27 |

|       |         |
|-------|---------|
| 83.9  | 3623.3  |
| 83.91 | 3779.33 |
| 83.92 | 3900.68 |
| 83.93 | 3796.67 |
| 83.94 | 3588.63 |
| 83.95 | 3536.62 |
| 83.96 | 3709.98 |
| 83.97 | 3380.59 |
| 83.98 | 3415.26 |
| 83.99 | 3519.28 |
| 84    | 3293.91 |
| 84.01 | 3640.64 |
| 84.02 | 3311.25 |
| 84.03 | 2999.19 |
| 84.04 | 3051.2  |
| 84.05 | 3033.86 |
| 84.06 | 3155.22 |
| 84.07 | 2704.47 |
| 84.08 | 3224.56 |
| 84.09 | 3519.28 |
| 84.1  | 3189.89 |
| 84.11 | 3172.56 |
| 84.12 | 3449.94 |
| 84.13 | 2964.52 |
| 84.14 | 2860.5  |
| 84.15 | 3241.9  |
| 84.16 | 3155.22 |
| 84.17 | 3085.87 |
| 84.18 | 2635.13 |
| 84.19 | 2635.13 |
| 84.2  | 2669.8  |
| 84.21 | 2565.78 |
| 84.22 | 2652.46 |
| 84.23 | 2513.77 |
| 84.24 | 2600.46 |
| 84.25 | 2721.81 |
| 84.26 | 2340.41 |
| 84.27 | 2357.75 |
| 84.28 | 2149.71 |
| 84.29 | 2357.75 |
| 84.3  | 1941.67 |
| 84.31 | 2115.04 |
| 84.32 | 2080.36 |
| 84.33 | 2115.04 |

|       |         |
|-------|---------|
| 84.34 | 1907    |
| 84.35 | 1785.65 |
| 84.36 | 2097.7  |
| 84.37 | 1907    |
| 84.38 | 2011.02 |
| 84.39 | 1872.33 |
| 84.4  | 1785.65 |
| 84.41 | 1594.95 |
| 84.42 | 1646.96 |
| 84.43 | 1646.96 |
| 84.44 | 1976.35 |
| 84.45 | 1525.6  |
| 84.46 | 1456.26 |
| 84.47 | 1837.66 |
| 84.48 | 1785.65 |
| 84.49 | 1664.29 |
| 84.5  | 1456.26 |
| 84.51 | 1456.26 |
| 84.52 | 1976.35 |
| 84.53 | 1577.61 |
| 84.54 | 1577.61 |
| 84.55 | 1716.3  |
| 84.56 | 1750.97 |
| 84.57 | 1629.62 |
| 84.58 | 1525.6  |
| 84.59 | 1456.26 |
| 84.6  | 1612.28 |
| 84.61 | 1594.95 |
| 84.62 | 1352.24 |
| 84.63 | 1612.28 |
| 84.64 | 1889.66 |
| 84.65 | 1334.9  |
| 84.66 | 1612.28 |
| 84.67 | 1820.32 |
| 84.68 | 1768.31 |
| 84.69 | 1785.65 |
| 84.7  | 1629.62 |
| 84.71 | 2097.7  |
| 84.72 | 1872.33 |
| 84.73 | 1698.96 |
| 84.74 | 1785.65 |
| 84.75 | 1681.63 |
| 84.76 | 1577.61 |
| 84.77 | 2011.02 |

|       |         |
|-------|---------|
| 84.78 | 1924.34 |
| 84.79 | 1820.32 |
| 84.8  | 2028.36 |
| 84.81 | 2063.03 |
| 84.82 | 2409.76 |
| 84.83 | 2167.05 |
| 84.84 | 2236.39 |
| 84.85 | 1959.01 |
| 84.86 | 2461.76 |
| 84.87 | 1750.97 |
| 84.88 | 2167.05 |
| 84.89 | 2375.08 |
| 84.9  | 2461.76 |
| 84.91 | 2427.09 |
| 84.92 | 2271.06 |
| 84.93 | 2600.46 |
| 84.94 | 2843.16 |
| 84.95 | 2860.5  |
| 84.96 | 2444.43 |
| 84.97 | 2288.4  |
| 84.98 | 2097.7  |
| 84.99 | 2583.12 |
| 85    | 2253.73 |
| 85.01 | 1907    |
| 85.02 | 2063.03 |
| 85.03 | 2045.69 |
| 85.04 | 2184.38 |
| 85.05 | 1889.66 |
| 85.06 | 2063.03 |
| 85.07 | 1889.66 |
| 85.08 | 1924.34 |
| 85.09 | 1959.01 |
| 85.1  | 1820.32 |
| 85.11 | 2115.04 |
| 85.12 | 1959.01 |
| 85.13 | 1802.98 |
| 85.14 | 2080.36 |
| 85.15 | 2097.7  |
| 85.16 | 2011.02 |
| 85.17 | 2132.37 |
| 85.18 | 1941.67 |
| 85.19 | 2132.37 |
| 85.2  | 1542.94 |
| 85.21 | 2028.36 |

|       |         |
|-------|---------|
| 85.22 | 1837.66 |
| 85.23 | 1681.63 |
| 85.24 | 1646.96 |
| 85.25 | 1577.61 |
| 85.26 | 1785.65 |
| 85.27 | 1386.91 |
| 85.28 | 1404.25 |
| 85.29 | 1386.91 |
| 85.3  | 1438.92 |
| 85.31 | 1750.97 |
| 85.32 | 1282.89 |
| 85.33 | 1664.29 |
| 85.34 | 1612.28 |
| 85.35 | 1525.6  |
| 85.36 | 1664.29 |
| 85.37 | 1248.22 |
| 85.38 | 1300.23 |
| 85.39 | 1508.26 |
| 85.4  | 1456.26 |
| 85.41 | 1282.89 |
| 85.42 | 1178.87 |
| 85.43 | 1334.9  |
| 85.44 | 1352.24 |
| 85.45 | 1040.18 |
| 85.46 | 1109.53 |
| 85.47 | 1317.56 |
| 85.48 | 1144.2  |
| 85.49 | 1334.9  |
| 85.5  | 1126.86 |
| 85.51 | 1092.19 |
| 85.52 | 1560.27 |
| 85.53 | 1248.22 |
| 85.54 | 1057.52 |
| 85.55 | 1196.21 |
| 85.56 | 1265.56 |
| 85.57 | 1161.54 |
| 85.58 | 1265.56 |
| 85.59 | 1456.26 |
| 85.6  | 1265.56 |
| 85.61 | 1282.89 |
| 85.62 | 1213.55 |
| 85.63 | 1057.52 |
| 85.64 | 1040.18 |
| 85.65 | 1022.85 |

|       |         |
|-------|---------|
| 85.66 | 1196.21 |
| 85.67 | 1196.21 |
| 85.68 | 1126.86 |
| 85.69 | 1109.53 |
| 85.7  | 1057.52 |
| 85.71 | 1022.85 |
| 85.72 | 1109.53 |
| 85.73 | 1265.56 |
| 85.74 | 1109.53 |
| 85.75 | 1404.25 |
| 85.76 | 1109.53 |
| 85.77 | 1057.52 |
| 85.78 | 1057.52 |
| 85.79 | 1022.85 |
| 85.8  | 1161.54 |
| 85.81 | 988.173 |
| 85.82 | 1144.2  |
| 85.83 | 1022.85 |
| 85.84 | 1334.9  |
| 85.85 | 1213.55 |
| 85.86 | 832.146 |
| 85.87 | 936.164 |
| 85.88 | 1057.52 |
| 85.89 | 1109.53 |
| 85.9  | 1126.86 |
| 85.91 | 1178.87 |
| 85.92 | 884.155 |
| 85.93 | 1109.53 |
| 85.94 | 1196.21 |
| 85.95 | 1109.53 |
| 85.96 | 988.173 |
| 85.97 | 988.173 |
| 85.98 | 1230.88 |
| 85.99 | 936.164 |
| 86    | 1109.53 |
| 86.01 | 1057.52 |
| 86.02 | 1057.52 |
| 86.03 | 1144.2  |
| 86.04 | 936.164 |
| 86.05 | 918.828 |
| 86.06 | 1126.86 |
| 86.07 | 1282.89 |
| 86.08 | 1438.92 |
| 86.09 | 1178.87 |

|       |         |
|-------|---------|
| 86.1  | 1161.54 |
| 86.11 | 1074.85 |
| 86.12 | 1074.85 |
| 86.13 | 1161.54 |
| 86.14 | 1161.54 |
| 86.15 | 1040.18 |
| 86.16 | 1369.57 |
| 86.17 | 1282.89 |
| 86.18 | 901.491 |
| 86.19 | 1126.86 |
| 86.2  | 1074.85 |
| 86.21 | 988.173 |
| 86.22 | 1161.54 |
| 86.23 | 1057.52 |
| 86.24 | 988.173 |
| 86.25 | 1144.2  |
| 86.26 | 884.155 |
| 86.27 | 1230.88 |
| 86.28 | 1178.87 |
| 86.29 | 970.837 |
| 86.3  | 1126.86 |
| 86.31 | 1144.2  |
| 86.32 | 1317.56 |
| 86.33 | 1161.54 |
| 86.34 | 1092.19 |
| 86.35 | 1282.89 |
| 86.36 | 1334.9  |
| 86.37 | 1196.21 |
| 86.38 | 1092.19 |
| 86.39 | 1092.19 |
| 86.4  | 1421.58 |
| 86.41 | 1352.24 |
| 86.42 | 1352.24 |
| 86.43 | 1404.25 |
| 86.44 | 1265.56 |
| 86.45 | 1144.2  |
| 86.46 | 1040.18 |
| 86.47 | 1317.56 |
| 86.48 | 1386.91 |
| 86.49 | 1404.25 |
| 86.5  | 1248.22 |
| 86.51 | 1490.93 |
| 86.52 | 1560.27 |
| 86.53 | 1144.2  |

|       |         |
|-------|---------|
| 86.54 | 1282.89 |
| 86.55 | 1386.91 |
| 86.56 | 1404.25 |
| 86.57 | 1352.24 |
| 86.58 | 1612.28 |
| 86.59 | 1404.25 |
| 86.6  | 1213.55 |
| 86.61 | 1456.26 |
| 86.62 | 1369.57 |
| 86.63 | 1421.58 |
| 86.64 | 1421.58 |
| 86.65 | 1560.27 |
| 86.66 | 1022.85 |
| 86.67 | 1040.18 |
| 86.68 | 901.491 |
| 86.69 | 1404.25 |
| 86.7  | 1404.25 |
| 86.71 | 1352.24 |
| 86.72 | 1317.56 |
| 86.73 | 1178.87 |
| 86.74 | 1022.85 |
| 86.75 | 1109.53 |
| 86.76 | 1213.55 |
| 86.77 | 1161.54 |
| 86.78 | 1282.89 |
| 86.79 | 1057.52 |
| 86.8  | 1057.52 |
| 86.81 | 1161.54 |
| 86.82 | 1074.85 |
| 86.83 | 1196.21 |
| 86.84 | 1126.86 |
| 86.85 | 1057.52 |
| 86.86 | 1265.56 |
| 86.87 | 1161.54 |
| 86.88 | 1178.87 |
| 86.89 | 1196.21 |
| 86.9  | 1352.24 |
| 86.91 | 1161.54 |
| 86.92 | 1057.52 |
| 86.93 | 1057.52 |
| 86.94 | 988.173 |
| 86.95 | 1161.54 |
| 86.96 | 901.491 |
| 86.97 | 1213.55 |



|       |         |
|-------|---------|
| 86.98 | 1178.87 |
| 86.99 | 1282.89 |
| 87    | 1144.2  |
| 87.01 | 1074.85 |
| 87.02 | 901.491 |
| 87.03 | 1126.86 |
| 87.04 | 884.155 |
| 87.05 | 1352.24 |
| 87.06 | 1196.21 |
| 87.07 | 1092.19 |
| 87.08 | 1092.19 |
| 87.09 | 936.164 |
| 87.1  | 936.164 |
| 87.11 | 970.837 |
| 87.12 | 884.155 |
| 87.13 | 970.837 |
| 87.14 | 953.5   |
| 87.15 | 988.173 |
| 87.16 | 1040.18 |
| 87.17 | 970.837 |
| 87.18 | 970.837 |
| 87.19 | 1040.18 |
| 87.2  | 1005.51 |
| 87.21 | 849.482 |
| 87.22 | 918.828 |
| 87.23 | 1040.18 |
| 87.24 | 1144.2  |
| 87.25 | 1040.18 |
| 87.26 | 797.473 |
| 87.27 | 988.173 |
| 87.28 | 988.173 |
| 87.29 | 936.164 |
| 87.3  | 918.828 |
| 87.31 | 1074.85 |
| 87.32 | 884.155 |
| 87.33 | 866.819 |
| 87.34 | 1057.52 |
| 87.35 | 988.173 |
| 87.36 | 866.819 |
| 87.37 | 866.819 |
| 87.38 | 1005.51 |
| 87.39 | 988.173 |
| 87.4  | 849.482 |
| 87.41 | 832.146 |

|       |         |
|-------|---------|
| 87.42 | 866.819 |
| 87.43 | 624.109 |
| 87.44 | 1022.85 |
| 87.45 | 988.173 |
| 87.46 | 1161.54 |
| 87.47 | 1109.53 |
| 87.48 | 918.828 |
| 87.49 | 1005.51 |
| 87.5  | 797.473 |
| 87.51 | 849.482 |
| 87.52 | 901.491 |
| 87.53 | 901.491 |
| 87.54 | 832.146 |
| 87.55 | 1040.18 |
| 87.56 | 1265.56 |
| 87.57 | 1040.18 |
| 87.58 | 884.155 |
| 87.59 | 1074.85 |
| 87.6  | 953.5   |
| 87.61 | 953.5   |
| 87.62 | 936.164 |
| 87.63 | 1109.53 |
| 87.64 | 1057.52 |
| 87.65 | 970.837 |
| 87.66 | 936.164 |
| 87.67 | 884.155 |
| 87.68 | 693.455 |
| 87.69 | 936.164 |
| 87.7  | 884.155 |
| 87.71 | 953.5   |
| 87.72 | 1074.85 |
| 87.73 | 936.164 |
| 87.74 | 936.164 |
| 87.75 | 988.173 |
| 87.76 | 1126.86 |
| 87.77 | 780.137 |
| 87.78 | 762.8   |
| 87.79 | 936.164 |
| 87.8  | 1005.51 |
| 87.81 | 970.837 |
| 87.82 | 970.837 |
| 87.83 | 1005.51 |
| 87.84 | 988.173 |
| 87.85 | 1005.51 |

|       |         |
|-------|---------|
| 87.86 | 884.155 |
| 87.87 | 866.819 |
| 87.88 | 970.837 |
| 87.89 | 1005.51 |
| 87.9  | 988.173 |
| 87.91 | 1109.53 |
| 87.92 | 901.491 |
| 87.93 | 1074.85 |
| 87.94 | 710.791 |
| 87.95 | 849.482 |
| 87.96 | 936.164 |
| 87.97 | 849.482 |
| 87.98 | 1109.53 |
| 87.99 | 953.5   |
| 88    | 1230.88 |
| 88.01 | 1005.51 |
| 88.02 | 901.491 |
| 88.03 | 1074.85 |
| 88.04 | 901.491 |
| 88.05 | 1161.54 |
| 88.06 | 953.5   |
| 88.07 | 953.5   |
| 88.08 | 884.155 |
| 88.09 | 988.173 |
| 88.1  | 936.164 |
| 88.11 | 884.155 |
| 88.12 | 832.146 |
| 88.13 | 1005.51 |
| 88.14 | 832.146 |
| 88.15 | 849.482 |
| 88.16 | 901.491 |
| 88.17 | 849.482 |
| 88.18 | 1282.89 |
| 88.19 | 918.828 |
| 88.2  | 710.791 |
| 88.21 | 1109.53 |
| 88.22 | 832.146 |
| 88.23 | 936.164 |
| 88.24 | 1126.86 |
| 88.25 | 1109.53 |
| 88.26 | 918.828 |
| 88.27 | 849.482 |
| 88.28 | 953.5   |
| 88.29 | 866.819 |

88.3 866.819  
88.31 970.837  
88.32 1074.85  
88.33 988.173  
88.34 884.155  
88.35 970.837  
88.36 936.164  
88.37 970.837  
88.38 901.491  
88.39 780.137  
88.4 884.155  
88.41 988.173  
88.42 918.828  
88.43 953.5  
88.44 1005.51  
88.45 1178.87  
88.46 884.155  
88.47 693.455  
88.48 901.491  
88.49 1178.87  
88.5 918.828  
88.51 953.5  
88.52 953.5  
88.53 1005.51  
88.54 988.173  
88.55 1178.87  
88.56 936.164  
88.57 1109.53  
88.58 970.837  
88.59 849.482  
88.6 936.164  
88.61 1126.86  
88.62 1196.21  
88.63 884.155  
88.64 901.491  
88.65 988.173  
88.66 1092.19  
88.67 936.164  
88.68 866.819  
88.69 1126.86  
88.7 849.482  
88.71 1178.87  
88.72 797.473  
88.73 1005.51

|       |         |
|-------|---------|
| 88.74 | 936.164 |
| 88.75 | 953.5   |
| 88.76 | 953.5   |
| 88.77 | 1126.86 |
| 88.78 | 849.482 |
| 88.79 | 1005.51 |
| 88.8  | 884.155 |
| 88.81 | 970.837 |
| 88.82 | 901.491 |
| 88.83 | 901.491 |
| 88.84 | 676.118 |
| 88.85 | 1057.52 |
| 88.86 | 1005.51 |
| 88.87 | 849.482 |
| 88.88 | 1092.19 |
| 88.89 | 1161.54 |
| 88.9  | 1126.86 |
| 88.91 | 884.155 |
| 88.92 | 970.837 |
| 88.93 | 953.5   |
| 88.94 | 866.819 |
| 88.95 | 953.5   |
| 88.96 | 780.137 |
| 88.97 | 832.146 |
| 88.98 | 884.155 |
| 88.99 | 762.8   |
| 89    | 988.173 |
| 89.01 | 970.837 |
| 89.02 | 970.837 |
| 89.03 | 884.155 |
| 89.04 | 1126.86 |
| 89.05 | 936.164 |
| 89.06 | 1022.85 |
| 89.07 | 936.164 |
| 89.08 | 901.491 |
| 89.09 | 780.137 |
| 89.1  | 970.837 |
| 89.11 | 918.828 |
| 89.12 | 901.491 |
| 89.13 | 866.819 |
| 89.14 | 814.809 |
| 89.15 | 936.164 |
| 89.16 | 970.837 |
| 89.17 | 1005.51 |

|       |         |
|-------|---------|
| 89.18 | 936.164 |
| 89.19 | 814.809 |
| 89.2  | 884.155 |
| 89.21 | 866.819 |
| 89.22 | 866.819 |
| 89.23 | 953.5   |
| 89.24 | 901.491 |
| 89.25 | 884.155 |
| 89.26 | 1074.85 |
| 89.27 | 866.819 |
| 89.28 | 832.146 |
| 89.29 | 1074.85 |
| 89.3  | 1040.18 |
| 89.31 | 1057.52 |
| 89.32 | 1005.51 |
| 89.33 | 641.446 |
| 89.34 | 884.155 |
| 89.35 | 884.155 |
| 89.36 | 1005.51 |
| 89.37 | 884.155 |
| 89.38 | 762.8   |
| 89.39 | 832.146 |
| 89.4  | 1057.52 |
| 89.41 | 849.482 |
| 89.42 | 936.164 |
| 89.43 | 953.5   |
| 89.44 | 866.819 |
| 89.45 | 1057.52 |
| 89.46 | 918.828 |
| 89.47 | 1057.52 |
| 89.48 | 970.837 |
| 89.49 | 953.5   |
| 89.5  | 1109.53 |
| 89.51 | 970.837 |
| 89.52 | 728.128 |
| 89.53 | 1022.85 |
| 89.54 | 884.155 |
| 89.55 | 745.464 |
| 89.56 | 866.819 |
| 89.57 | 918.828 |
| 89.58 | 936.164 |
| 89.59 | 901.491 |
| 89.6  | 901.491 |
| 89.61 | 780.137 |

|       |         |
|-------|---------|
| 89.62 | 832.146 |
| 89.63 | 1040.18 |
| 89.64 | 866.819 |
| 89.65 | 1074.85 |
| 89.66 | 1040.18 |
| 89.67 | 988.173 |
| 89.68 | 936.164 |
| 89.69 | 780.137 |
| 89.7  | 936.164 |
| 89.71 | 953.5   |
| 89.72 | 936.164 |
| 89.73 | 832.146 |
| 89.74 | 918.828 |
| 89.75 | 988.173 |
| 89.76 | 901.491 |
| 89.77 | 988.173 |
| 89.78 | 814.809 |
| 89.79 | 884.155 |
| 89.8  | 988.173 |
| 89.81 | 849.482 |
| 89.82 | 1005.51 |
| 89.83 | 901.491 |
| 89.84 | 918.828 |
| 89.85 | 1040.18 |
| 89.86 | 936.164 |
| 89.87 | 849.482 |
| 89.88 | 1126.86 |
| 89.89 | 936.164 |
| 89.9  | 936.164 |
| 89.91 | 814.809 |
| 89.92 | 1005.51 |
| 89.93 | 762.8   |
| 89.94 | 762.8   |
| 89.95 | 1074.85 |
| 89.96 | 936.164 |
| 89.97 | 866.819 |
| 89.98 | 884.155 |
| 89.99 | 1005.51 |
| 90    | 953.5   |

|         |      |         |
|---------|------|---------|
| xrd80kg | 5    | 4888.86 |
|         | 5.01 | 5166.24 |
|         | 5.02 | 5339.6  |
|         | 5.03 | 5582.31 |

5.04 5408.95  
5.05 5651.66  
5.06 5616.98  
5.07 5287.59  
5.08 5322.27  
5.09 5044.88  
5.1 5148.9  
5.11 5755.67  
5.12 5478.29  
5.13 5010.21  
5.14 5460.96  
5.15 5235.58  
5.16 5842.36  
5.17 5755.67  
5.18 5530.3  
5.19 5148.9  
5.2 5148.9  
5.21 5738.34  
5.22 5460.96  
5.23 5599.65  
5.24 5929.04  
5.25 5235.58  
5.26 5426.28  
5.27 5287.59  
5.28 5963.71  
5.29 6102.4  
5.3 6154.41  
5.31 5773.01  
5.32 5356.94  
5.33 5183.57  
5.34 5773.01  
5.35 5356.94  
5.36 5460.96  
5.37 6171.75  
5.38 5374.27  
5.39 5790.35  
5.4 5564.98  
5.41 6206.42  
5.42 6362.45  
5.43 5166.24  
5.44 5460.96  
5.45 5807.68  
5.46 5634.32  
5.47 6431.79



5.48 5391.61  
5.49 5304.93  
5.5 5512.97  
5.51 6154.41  
5.52 5616.98  
5.53 5877.03  
5.54 5478.29  
5.55 5721  
5.56 5790.35  
5.57 6067.73  
5.58 5339.6  
5.59 5842.36  
5.6 5651.66  
5.61 5443.62  
5.62 5807.68  
5.63 5963.71  
5.64 5998.38  
5.65 5946.38  
5.66 5426.28  
5.67 5131.57  
5.68 5495.63  
5.69 5963.71  
5.7 6067.73  
5.71 6119.74  
5.72 5981.05  
5.73 5564.98  
5.74 5634.32  
5.75 6050.39  
5.76 5721  
5.77 5270.26  
5.78 5998.38  
5.79 6015.72  
5.8 6830.53  
5.81 5547.64  
5.82 6085.07  
5.83 5738.34  
5.84 5616.98  
5.85 6015.72  
5.86 5460.96  
5.87 5322.27  
5.88 5426.28  
5.89 5478.29  
5.9 5547.64  
5.91 6171.75

|      |         |
|------|---------|
| 5.92 | 5877.03 |
| 5.93 | 5634.32 |
| 5.94 | 5391.61 |
| 5.95 | 6119.74 |
| 5.96 | 6293.1  |
| 5.97 | 6102.4  |
| 5.98 | 5929.04 |
| 5.99 | 6137.08 |
| 6    | 5929.04 |
| 6.01 | 5738.34 |
| 6.02 | 6085.07 |
| 6.03 | 5842.36 |
| 6.04 | 5599.65 |
| 6.05 | 5929.04 |
| 6.06 | 5547.64 |
| 6.07 | 5773.01 |
| 6.08 | 5564.98 |
| 6.09 | 5998.38 |
| 6.1  | 5634.32 |
| 6.11 | 5894.37 |
| 6.12 | 6154.41 |
| 6.13 | 5703.67 |
| 6.14 | 5859.69 |
| 6.15 | 5894.37 |
| 6.16 | 6171.75 |
| 6.17 | 5946.38 |
| 6.18 | 5807.68 |
| 6.19 | 5842.36 |
| 6.2  | 5651.66 |
| 6.21 | 5946.38 |
| 6.22 | 5443.62 |
| 6.23 | 5773.01 |
| 6.24 | 6171.75 |
| 6.25 | 6067.73 |
| 6.26 | 5894.37 |
| 6.27 | 6119.74 |
| 6.28 | 5929.04 |
| 6.29 | 6171.75 |
| 6.3  | 6275.77 |
| 6.31 | 6171.75 |
| 6.32 | 5825.02 |
| 6.33 | 5773.01 |
| 6.34 | 6050.39 |
| 6.35 | 5634.32 |

6.36 5426.28  
6.37 5946.38  
6.38 5616.98  
6.39 5495.63  
6.4 5807.68  
6.41 5981.05  
6.42 5963.71  
6.43 6449.13  
6.44 6275.77  
6.45 5651.66  
6.46 5790.35  
6.47 5755.67  
6.48 6119.74  
6.49 5599.65  
6.5 6067.73  
6.51 6050.39  
6.52 5738.34  
6.53 5460.96  
6.54 5807.68  
6.55 6102.4  
6.56 5807.68  
6.57 5825.02  
6.58 6171.75  
6.59 6067.73  
6.6 6293.1  
6.61 6466.47  
6.62 6119.74  
6.63 5773.01  
6.64 6050.39  
6.65 5530.3  
6.66 5582.31  
6.67 5738.34  
6.68 5998.38  
6.69 6275.77  
6.7 5616.98  
6.71 5547.64  
6.72 5408.95  
6.73 5755.67  
6.74 6102.4  
6.75 5616.98  
6.76 5339.6  
6.77 5963.71  
6.78 6345.11  
6.79 6171.75

6.8 6015.72  
6.81 5842.36  
6.82 5668.99  
6.83 5877.03  
6.84 5877.03  
6.85 5495.63  
6.86 5825.02  
6.87 6206.42  
6.88 6847.87  
6.89 6154.41  
6.9 5807.68  
6.91 5981.05  
6.92 5547.64  
6.93 6015.72  
6.94 5790.35  
6.95 6189.08  
6.96 5773.01  
6.97 5859.69  
6.98 5911.7  
6.99 6657.17  
7 5773.01  
7.01 5807.68  
7.02 5981.05  
7.03 6102.4  
7.04 5270.26  
7.05 5235.58  
7.06 5079.56  
7.07 5721  
7.08 5859.69  
7.09 5460.96  
7.1 6189.08  
7.11 5911.7  
7.12 5582.31  
7.13 5790.35  
7.14 5512.97  
7.15 5946.38  
7.16 6379.78  
7.17 5738.34  
7.18 5981.05  
7.19 6293.1  
7.2 5877.03  
7.21 5443.62  
7.22 5703.67  
7.23 5460.96

7.24 6327.78  
7.25 6050.39  
7.26 5322.27  
7.27 6241.09  
7.28 5825.02  
7.29 6345.11  
7.3 5634.32  
7.31 6258.43  
7.32 5790.35  
7.33 6119.74  
7.34 6171.75  
7.35 6119.74  
7.36 5755.67  
7.37 5564.98  
7.38 5807.68  
7.39 6067.73  
7.4 5322.27  
7.41 5825.02  
7.42 6206.42  
7.43 5894.37  
7.44 5599.65  
7.45 5825.02  
7.46 6171.75  
7.47 6275.77  
7.48 5721  
7.49 5235.58  
7.5 5686.33  
7.51 6033.06  
7.52 6691.84  
7.53 5981.05  
7.54 5668.99  
7.55 5547.64  
7.56 6466.47  
7.57 6050.39  
7.58 6119.74  
7.59 5495.63  
7.6 5859.69  
7.61 5721  
7.62 5842.36  
7.63 5721  
7.64 6015.72  
7.65 5825.02  
7.66 5859.69  
7.67 5460.96

|      |         |
|------|---------|
| 7.68 | 5634.32 |
| 7.69 | 5478.29 |
| 7.7  | 5773.01 |
| 7.71 | 5616.98 |
| 7.72 | 5530.3  |
| 7.73 | 6102.4  |
| 7.74 | 6119.74 |
| 7.75 | 6137.08 |
| 7.76 | 5877.03 |
| 7.77 | 5356.94 |
| 7.78 | 5721    |
| 7.79 | 5703.67 |
| 7.8  | 5322.27 |
| 7.81 | 5842.36 |
| 7.82 | 6119.74 |
| 7.83 | 5651.66 |
| 7.84 | 5790.35 |
| 7.85 | 5391.61 |
| 7.86 | 5998.38 |
| 7.87 | 6067.73 |
| 7.88 | 5929.04 |
| 7.89 | 5738.34 |
| 7.9  | 5582.31 |
| 7.91 | 5478.29 |
| 7.92 | 5443.62 |
| 7.93 | 5825.02 |
| 7.94 | 5929.04 |
| 7.95 | 5686.33 |
| 7.96 | 5235.58 |
| 7.97 | 5530.3  |
| 7.98 | 5859.69 |
| 7.99 | 5807.68 |
| 8    | 6154.41 |
| 8.01 | 5981.05 |
| 8.02 | 5599.65 |
| 8.03 | 5825.02 |
| 8.04 | 5668.99 |
| 8.05 | 5842.36 |
| 8.06 | 5807.68 |
| 8.07 | 6050.39 |
| 8.08 | 5773.01 |
| 8.09 | 5599.65 |
| 8.1  | 6258.43 |
| 8.11 | 5443.62 |

8.12 5894.37  
8.13 5807.68  
8.14 5859.69  
8.15 5790.35  
8.16 5859.69  
8.17 5703.67  
8.18 5044.88  
8.19 5235.58  
8.2 5408.95  
8.21 5547.64  
8.22 4871.52  
8.23 5131.57  
8.24 5408.95  
8.25 5495.63  
8.26 5166.24  
8.27 5512.97  
8.28 5703.67  
8.29 5686.33  
8.3 5738.34  
8.31 5582.31  
8.32 5668.99  
8.33 5651.66  
8.34 5287.59  
8.35 5564.98  
8.36 5582.31  
8.37 5963.71  
8.38 5703.67  
8.39 5547.64  
8.4 5634.32  
8.41 5634.32  
8.42 6033.06  
8.43 5894.37  
8.44 5755.67  
8.45 5911.7  
8.46 5339.6  
8.47 5460.96  
8.48 5668.99  
8.49 6050.39  
8.5 5478.29  
8.51 6362.45  
8.52 5686.33  
8.53 5356.94  
8.54 5773.01  
8.55 5478.29

8.56 5304.93  
8.57 5686.33  
8.58 5478.29  
8.59 4975.54  
8.6 5044.88  
8.61 5287.59  
8.62 5651.66  
8.63 5651.66  
8.64 5443.62  
8.65 5547.64  
8.66 5460.96  
8.67 4871.52  
8.68 5287.59  
8.69 5963.71  
8.7 5963.71  
8.71 5738.34  
8.72 5374.27  
8.73 5304.93  
8.74 5686.33  
8.75 5651.66  
8.76 5443.62  
8.77 5686.33  
8.78 5131.57  
8.79 5512.97  
8.8 5755.67  
8.81 5131.57  
8.82 5408.95  
8.83 5339.6  
8.84 5218.25  
8.85 5044.88  
8.86 5651.66  
8.87 5495.63  
8.88 5322.27  
8.89 5044.88  
8.9 5686.33  
8.91 5010.21  
8.92 5339.6  
8.93 4854.18  
8.94 5218.25  
8.95 5096.89  
8.96 5148.9  
8.97 5512.97  
8.98 5495.63  
8.99 5616.98



|      |         |
|------|---------|
| 9    | 5616.98 |
| 9.01 | 5062.22 |
| 9.02 | 5304.93 |
| 9.03 | 5842.36 |
| 9.04 | 4940.87 |
| 9.05 | 5287.59 |
| 9.06 | 5408.95 |
| 9.07 | 5235.58 |
| 9.08 | 5287.59 |
| 9.09 | 5339.6  |
| 9.1  | 5114.23 |
| 9.11 | 5010.21 |
| 9.12 | 5148.9  |
| 9.13 | 5530.3  |
| 9.14 | 5356.94 |
| 9.15 | 5512.97 |
| 9.16 | 5374.27 |
| 9.17 | 5270.26 |
| 9.18 | 5686.33 |
| 9.19 | 4802.17 |
| 9.2  | 4958.2  |
| 9.21 | 5512.97 |
| 9.22 | 5374.27 |
| 9.23 | 5408.95 |
| 9.24 | 5322.27 |
| 9.25 | 5339.6  |
| 9.26 | 5512.97 |
| 9.27 | 5339.6  |
| 9.28 | 5200.91 |
| 9.29 | 5131.57 |
| 9.3  | 5252.92 |
| 9.31 | 5547.64 |
| 9.32 | 4784.84 |
| 9.33 | 5391.61 |
| 9.34 | 5183.57 |
| 9.35 | 4923.53 |
| 9.36 | 5391.61 |
| 9.37 | 4680.82 |
| 9.38 | 5356.94 |
| 9.39 | 5426.28 |
| 9.4  | 5044.88 |
| 9.41 | 4455.45 |
| 9.42 | 4975.54 |
| 9.43 | 4888.86 |

9.44 5252.92  
9.45 5460.96  
9.46 5408.95  
9.47 4975.54  
9.48 5114.23  
9.49 4940.87  
9.5 5183.57  
9.51 5200.91  
9.52 5270.26  
9.53 4958.2  
9.54 5322.27  
9.55 5391.61  
9.56 5096.89  
9.57 4802.17  
9.58 5287.59  
9.59 5148.9  
9.6 4958.2  
9.61 4958.2  
9.62 5096.89  
9.63 4923.53  
9.64 4854.18  
9.65 5027.55  
9.66 5304.93  
9.67 4594.14  
9.68 5408.95  
9.69 5218.25  
9.7 4888.86  
9.71 4958.2  
9.72 5322.27  
9.73 4594.14  
9.74 4472.78  
9.75 5148.9  
9.76 4836.85  
9.77 4871.52  
9.78 4958.2  
9.79 4888.86  
9.8 5114.23  
9.81 5773.01  
9.82 5391.61  
9.83 5200.91  
9.84 5374.27  
9.85 5252.92  
9.86 5062.22  
9.87 4524.79

|       |         |
|-------|---------|
| 9.88  | 4802.17 |
| 9.89  | 5114.23 |
| 9.9   | 5027.55 |
| 9.91  | 4802.17 |
| 9.92  | 5131.57 |
| 9.93  | 5010.21 |
| 9.94  | 4542.13 |
| 9.95  | 4732.83 |
| 9.96  | 4542.13 |
| 9.97  | 5148.9  |
| 9.98  | 4940.87 |
| 9.99  | 5148.9  |
| 10    | 4888.86 |
| 10.01 | 4802.17 |
| 10.02 | 4698.16 |
| 10.03 | 5114.23 |
| 10.04 | 5062.22 |
| 10.05 | 5356.94 |
| 10.06 | 4836.85 |
| 10.07 | 4854.18 |
| 10.08 | 4923.53 |
| 10.09 | 4940.87 |
| 10.1  | 4767.5  |
| 10.11 | 4940.87 |
| 10.12 | 4819.51 |
| 10.13 | 5131.57 |
| 10.14 | 5270.26 |
| 10.15 | 5062.22 |
| 10.16 | 5426.28 |
| 10.17 | 4975.54 |
| 10.18 | 4715.49 |
| 10.19 | 4784.84 |
| 10.2  | 4715.49 |
| 10.21 | 4923.53 |
| 10.22 | 4906.19 |
| 10.23 | 5131.57 |
| 10.24 | 5062.22 |
| 10.25 | 5460.96 |
| 10.26 | 5218.25 |
| 10.27 | 4871.52 |
| 10.28 | 5200.91 |
| 10.29 | 4698.16 |
| 10.3  | 4594.14 |
| 10.31 | 4802.17 |

|       |         |
|-------|---------|
| 10.32 | 5096.89 |
| 10.33 | 4854.18 |
| 10.34 | 5062.22 |
| 10.35 | 4715.49 |
| 10.36 | 4854.18 |
| 10.37 | 4923.53 |
| 10.38 | 5010.21 |
| 10.39 | 4906.19 |
| 10.4  | 4368.77 |
| 10.41 | 5096.89 |
| 10.42 | 4524.79 |
| 10.43 | 5096.89 |
| 10.44 | 4732.83 |
| 10.45 | 4732.83 |
| 10.46 | 4299.42 |
| 10.47 | 4871.52 |
| 10.48 | 4767.5  |
| 10.49 | 4386.1  |
| 10.5  | 4698.16 |
| 10.51 | 4871.52 |
| 10.52 | 4663.48 |
| 10.53 | 4403.44 |
| 10.54 | 4576.8  |
| 10.55 | 4663.48 |
| 10.56 | 4628.81 |
| 10.57 | 4420.77 |
| 10.58 | 4750.17 |
| 10.59 | 4836.85 |
| 10.6  | 4750.17 |
| 10.61 | 4732.83 |
| 10.62 | 4767.5  |
| 10.63 | 4958.2  |
| 10.64 | 4784.84 |
| 10.65 | 4282.08 |
| 10.66 | 4351.43 |
| 10.67 | 4576.8  |
| 10.68 | 4299.42 |
| 10.69 | 4628.81 |
| 10.7  | 4247.41 |
| 10.71 | 4715.49 |
| 10.72 | 4559.47 |
| 10.73 | 4750.17 |
| 10.74 | 4334.09 |
| 10.75 | 5062.22 |

|       |         |
|-------|---------|
| 10.76 | 4542.13 |
| 10.77 | 4490.12 |
| 10.78 | 4576.8  |
| 10.79 | 4542.13 |
| 10.8  | 4559.47 |
| 10.81 | 4455.45 |
| 10.82 | 4490.12 |
| 10.83 | 4628.81 |
| 10.84 | 4611.47 |
| 10.85 | 4767.5  |
| 10.86 | 4923.53 |
| 10.87 | 4178.07 |
| 10.88 | 4663.48 |
| 10.89 | 4212.74 |
| 10.9  | 4594.14 |
| 10.91 | 4334.09 |
| 10.92 | 4524.79 |
| 10.93 | 4646.15 |
| 10.94 | 4732.83 |
| 10.95 | 4420.77 |
| 10.96 | 4784.84 |
| 10.97 | 4940.87 |
| 10.98 | 4576.8  |
| 10.99 | 4663.48 |
| 11    | 4715.49 |
| 11.01 | 4282.08 |
| 11.02 | 4143.39 |
| 11.03 | 4611.47 |
| 11.04 | 4819.51 |
| 11.05 | 4975.54 |
| 11.06 | 4784.84 |
| 11.07 | 4871.52 |
| 11.08 | 4455.45 |
| 11.09 | 4576.8  |
| 11.1  | 4594.14 |
| 11.11 | 4455.45 |
| 11.12 | 4680.82 |
| 11.13 | 4923.53 |
| 11.14 | 4108.72 |
| 11.15 | 4368.77 |
| 11.16 | 4871.52 |
| 11.17 | 4611.47 |
| 11.18 | 4178.07 |
| 11.19 | 4334.09 |

|       |         |
|-------|---------|
| 11.2  | 4074.05 |
| 11.21 | 4576.8  |
| 11.22 | 4542.13 |
| 11.23 | 4732.83 |
| 11.24 | 4299.42 |
| 11.25 | 4472.78 |
| 11.26 | 3987.37 |
| 11.27 | 4126.06 |
| 11.28 | 4594.14 |
| 11.29 | 4056.71 |
| 11.3  | 4160.73 |
| 11.31 | 4490.12 |
| 11.32 | 4212.74 |
| 11.33 | 4351.43 |
| 11.34 | 4680.82 |
| 11.35 | 4230.07 |
| 11.36 | 4472.78 |
| 11.37 | 4576.8  |
| 11.38 | 4507.46 |
| 11.39 | 4247.41 |
| 11.4  | 4594.14 |
| 11.41 | 4455.45 |
| 11.42 | 4230.07 |
| 11.43 | 4420.77 |
| 11.44 | 4160.73 |
| 11.45 | 4472.78 |
| 11.46 | 4195.4  |
| 11.47 | 4524.79 |
| 11.48 | 4264.75 |
| 11.49 | 4299.42 |
| 11.5  | 4403.44 |
| 11.51 | 4524.79 |
| 11.52 | 3970.03 |
| 11.53 | 4126.06 |
| 11.54 | 4628.81 |
| 11.55 | 4403.44 |
| 11.56 | 4334.09 |
| 11.57 | 3970.03 |
| 11.58 | 4022.04 |
| 11.59 | 4368.77 |
| 11.6  | 4039.37 |
| 11.61 | 3918.02 |
| 11.62 | 3970.03 |
| 11.63 | 4143.39 |

|       |         |
|-------|---------|
| 11.64 | 4195.4  |
| 11.65 | 4386.1  |
| 11.66 | 4576.8  |
| 11.67 | 4403.44 |
| 11.68 | 3970.03 |
| 11.69 | 4507.46 |
| 11.7  | 4316.76 |
| 11.71 | 4455.45 |
| 11.72 | 4611.47 |
| 11.73 | 3692.65 |
| 11.74 | 4004.7  |
| 11.75 | 4247.41 |
| 11.76 | 4022.04 |
| 11.77 | 4160.73 |
| 11.78 | 4628.81 |
| 11.79 | 4195.4  |
| 11.8  | 4316.76 |
| 11.81 | 4646.15 |
| 11.82 | 4524.79 |
| 11.83 | 4178.07 |
| 11.84 | 4108.72 |
| 11.85 | 3796.67 |
| 11.86 | 4091.38 |
| 11.87 | 4247.41 |
| 11.88 | 4212.74 |
| 11.89 | 4264.75 |
| 11.9  | 4542.13 |
| 11.91 | 4056.71 |
| 11.92 | 4403.44 |
| 11.93 | 3952.69 |
| 11.94 | 4247.41 |
| 11.95 | 4438.11 |
| 11.96 | 4160.73 |
| 11.97 | 4542.13 |
| 11.98 | 3779.33 |
| 11.99 | 4074.05 |
| 12    | 4628.81 |
| 12.01 | 4542.13 |
| 12.02 | 4195.4  |
| 12.03 | 4871.52 |
| 12.04 | 4368.77 |
| 12.05 | 4351.43 |
| 12.06 | 4074.05 |
| 12.07 | 3970.03 |

|       |         |
|-------|---------|
| 12.08 | 3883.35 |
| 12.09 | 4039.37 |
| 12.1  | 4542.13 |
| 12.11 | 4160.73 |
| 12.12 | 4386.1  |
| 12.13 | 4490.12 |
| 12.14 | 4195.4  |
| 12.15 | 4091.38 |
| 12.16 | 4888.86 |
| 12.17 | 4403.44 |
| 12.18 | 3900.68 |
| 12.19 | 3744.66 |
| 12.2  | 4524.79 |
| 12.21 | 3935.36 |
| 12.22 | 4334.09 |
| 12.23 | 4039.37 |
| 12.24 | 3866.01 |
| 12.25 | 3866.01 |
| 12.26 | 4282.08 |
| 12.27 | 3970.03 |
| 12.28 | 4334.09 |
| 12.29 | 3987.37 |
| 12.3  | 4004.7  |
| 12.31 | 4438.11 |
| 12.32 | 4455.45 |
| 12.33 | 3640.64 |
| 12.34 | 4455.45 |
| 12.35 | 4247.41 |
| 12.36 | 3814    |
| 12.37 | 3709.98 |
| 12.38 | 3814    |
| 12.39 | 4056.71 |
| 12.4  | 4403.44 |
| 12.41 | 4195.4  |
| 12.42 | 3866.01 |
| 12.43 | 4195.4  |
| 12.44 | 3761.99 |
| 12.45 | 4195.4  |
| 12.46 | 4195.4  |
| 12.47 | 3918.02 |
| 12.48 | 4160.73 |
| 12.49 | 3553.96 |
| 12.5  | 3848.67 |
| 12.51 | 3779.33 |



|       |         |
|-------|---------|
| 12.52 | 4160.73 |
| 12.53 | 3761.99 |
| 12.54 | 3935.36 |
| 12.55 | 4264.75 |
| 12.56 | 4351.43 |
| 12.57 | 4056.71 |
| 12.58 | 4126.06 |
| 12.59 | 3848.67 |
| 12.6  | 3866.01 |
| 12.61 | 3814    |
| 12.62 | 3918.02 |
| 12.63 | 4056.71 |
| 12.64 | 4264.75 |
| 12.65 | 3918.02 |
| 12.66 | 4420.77 |
| 12.67 | 3727.32 |
| 12.68 | 4420.77 |
| 12.69 | 3779.33 |
| 12.7  | 3935.36 |
| 12.71 | 4004.7  |
| 12.72 | 3935.36 |
| 12.73 | 4316.76 |
| 12.74 | 4074.05 |
| 12.75 | 3744.66 |
| 12.76 | 3796.67 |
| 12.77 | 3831.34 |
| 12.78 | 3796.67 |
| 12.79 | 4039.37 |
| 12.8  | 4403.44 |
| 12.81 | 3970.03 |
| 12.82 | 3761.99 |
| 12.83 | 4056.71 |
| 12.84 | 3623.3  |
| 12.85 | 3935.36 |
| 12.86 | 4022.04 |
| 12.87 | 3571.29 |
| 12.88 | 3727.32 |
| 12.89 | 4247.41 |
| 12.9  | 4247.41 |
| 12.91 | 4004.7  |
| 12.92 | 4039.37 |
| 12.93 | 4004.7  |
| 12.94 | 3692.65 |
| 12.95 | 4143.39 |

|       |         |
|-------|---------|
| 12.96 | 4056.71 |
| 12.97 | 3727.32 |
| 12.98 | 3692.65 |
| 12.99 | 3675.31 |
| 13    | 3640.64 |
| 13.01 | 3397.93 |
| 13.02 | 3848.67 |
| 13.03 | 3952.69 |
| 13.04 | 3935.36 |
| 13.05 | 3675.31 |
| 13.06 | 4056.71 |
| 13.07 | 3883.35 |
| 13.08 | 3449.94 |
| 13.09 | 3900.68 |
| 13.1  | 3848.67 |
| 13.11 | 3796.67 |
| 13.12 | 3501.95 |
| 13.13 | 3692.65 |
| 13.14 | 3553.96 |
| 13.15 | 3588.63 |
| 13.16 | 3883.35 |
| 13.17 | 3467.27 |
| 13.18 | 3970.03 |
| 13.19 | 3657.97 |
| 13.2  | 3657.97 |
| 13.21 | 3519.28 |
| 13.22 | 3657.97 |
| 13.23 | 3415.26 |
| 13.24 | 4195.4  |
| 13.25 | 3744.66 |
| 13.26 | 3415.26 |
| 13.27 | 4056.71 |
| 13.28 | 3848.67 |
| 13.29 | 4022.04 |
| 13.3  | 3588.63 |
| 13.31 | 3519.28 |
| 13.32 | 3449.94 |
| 13.33 | 3605.97 |
| 13.34 | 4074.05 |
| 13.35 | 4091.38 |
| 13.36 | 3744.66 |
| 13.37 | 3640.64 |
| 13.38 | 3987.37 |
| 13.39 | 3883.35 |

|       |         |
|-------|---------|
| 13.4  | 3779.33 |
| 13.41 | 3571.29 |
| 13.42 | 3120.55 |
| 13.43 | 3761.99 |
| 13.44 | 3571.29 |
| 13.45 | 3328.58 |
| 13.46 | 3623.3  |
| 13.47 | 3449.94 |
| 13.48 | 3848.67 |
| 13.49 | 3571.29 |
| 13.5  | 3935.36 |
| 13.51 | 3207.23 |
| 13.52 | 3605.97 |
| 13.53 | 3796.67 |
| 13.54 | 3727.32 |
| 13.55 | 3432.6  |
| 13.56 | 3380.59 |
| 13.57 | 3709.98 |
| 13.58 | 3588.63 |
| 13.59 | 3744.66 |
| 13.6  | 3918.02 |
| 13.61 | 3761.99 |
| 13.62 | 3588.63 |
| 13.63 | 3553.96 |
| 13.64 | 3484.61 |
| 13.65 | 3189.89 |
| 13.66 | 3657.97 |
| 13.67 | 3467.27 |
| 13.68 | 3675.31 |
| 13.69 | 3848.67 |
| 13.7  | 3605.97 |
| 13.71 | 3397.93 |
| 13.72 | 3675.31 |
| 13.73 | 3103.21 |
| 13.74 | 3068.54 |
| 13.75 | 3311.25 |
| 13.76 | 3345.92 |
| 13.77 | 3814    |
| 13.78 | 3605.97 |
| 13.79 | 3345.92 |
| 13.8  | 3571.29 |
| 13.81 | 3467.27 |
| 13.82 | 4004.7  |
| 13.83 | 3692.65 |

|       |         |
|-------|---------|
| 13.84 | 4039.37 |
| 13.85 | 4212.74 |
| 13.86 | 4126.06 |
| 13.87 | 3293.91 |
| 13.88 | 3657.97 |
| 13.89 | 3605.97 |
| 13.9  | 3761.99 |
| 13.91 | 3814    |
| 13.92 | 3779.33 |
| 13.93 | 3137.88 |
| 13.94 | 3675.31 |
| 13.95 | 3328.58 |
| 13.96 | 3293.91 |
| 13.97 | 3761.99 |
| 13.98 | 3519.28 |
| 13.99 | 3831.34 |
| 14    | 3449.94 |
| 14.01 | 3935.36 |
| 14.02 | 3467.27 |
| 14.03 | 3415.26 |
| 14.04 | 3553.96 |
| 14.05 | 3848.67 |
| 14.06 | 3363.26 |
| 14.07 | 3727.32 |
| 14.08 | 3727.32 |
| 14.09 | 4074.05 |
| 14.1  | 3918.02 |
| 14.11 | 4022.04 |
| 14.12 | 3553.96 |
| 14.13 | 3623.3  |
| 14.14 | 3727.32 |
| 14.15 | 3571.29 |
| 14.16 | 3432.6  |
| 14.17 | 3848.67 |
| 14.18 | 3571.29 |
| 14.19 | 3675.31 |
| 14.2  | 3328.58 |
| 14.21 | 3380.59 |
| 14.22 | 3553.96 |
| 14.23 | 3848.67 |
| 14.24 | 3623.3  |
| 14.25 | 3345.92 |
| 14.26 | 3571.29 |
| 14.27 | 3519.28 |

|       |         |
|-------|---------|
| 14.28 | 3623.3  |
| 14.29 | 3501.95 |
| 14.3  | 3536.62 |
| 14.31 | 3103.21 |
| 14.32 | 3709.98 |
| 14.33 | 3571.29 |
| 14.34 | 4212.74 |
| 14.35 | 3605.97 |
| 14.36 | 3467.27 |
| 14.37 | 3449.94 |
| 14.38 | 3432.6  |
| 14.39 | 3796.67 |
| 14.4  | 3623.3  |
| 14.41 | 3432.6  |
| 14.42 | 3761.99 |
| 14.43 | 3137.88 |
| 14.44 | 2981.86 |
| 14.45 | 3571.29 |
| 14.46 | 3172.56 |
| 14.47 | 3432.6  |
| 14.48 | 3328.58 |
| 14.49 | 3675.31 |
| 14.5  | 3363.26 |
| 14.51 | 3848.67 |
| 14.52 | 3623.3  |
| 14.53 | 3519.28 |
| 14.54 | 3484.61 |
| 14.55 | 3345.92 |
| 14.56 | 3397.93 |
| 14.57 | 3709.98 |
| 14.58 | 3363.26 |
| 14.59 | 3449.94 |
| 14.6  | 3709.98 |
| 14.61 | 3311.25 |
| 14.62 | 3189.89 |
| 14.63 | 3484.61 |
| 14.64 | 3311.25 |
| 14.65 | 3553.96 |
| 14.66 | 3259.24 |
| 14.67 | 3467.27 |
| 14.68 | 3501.95 |
| 14.69 | 3016.53 |
| 14.7  | 3501.95 |
| 14.71 | 3779.33 |

|       |         |
|-------|---------|
| 14.72 | 3449.94 |
| 14.73 | 3345.92 |
| 14.74 | 3848.67 |
| 14.75 | 3449.94 |
| 14.76 | 3432.6  |
| 14.77 | 3848.67 |
| 14.78 | 3189.89 |
| 14.79 | 3033.86 |
| 14.8  | 3155.22 |
| 14.81 | 3380.59 |
| 14.82 | 3276.57 |
| 14.83 | 3519.28 |
| 14.84 | 3744.66 |
| 14.85 | 3137.88 |
| 14.86 | 3484.61 |
| 14.87 | 3345.92 |
| 14.88 | 3068.54 |
| 14.89 | 3224.56 |
| 14.9  | 3484.61 |
| 14.91 | 3744.66 |
| 14.92 | 3588.63 |
| 14.93 | 3432.6  |
| 14.94 | 2912.51 |
| 14.95 | 3224.56 |
| 14.96 | 3380.59 |
| 14.97 | 3397.93 |
| 14.98 | 2964.52 |
| 14.99 | 3380.59 |
| 15    | 3501.95 |
| 15.01 | 3536.62 |
| 15.02 | 3727.32 |
| 15.03 | 3397.93 |
| 15.04 | 3640.64 |
| 15.05 | 3484.61 |
| 15.06 | 3397.93 |
| 15.07 | 3519.28 |
| 15.08 | 3779.33 |
| 15.09 | 3501.95 |
| 15.1  | 3432.6  |
| 15.11 | 3137.88 |
| 15.12 | 3467.27 |
| 15.13 | 3449.94 |
| 15.14 | 3484.61 |
| 15.15 | 3293.91 |

|       |         |
|-------|---------|
| 15.16 | 3224.56 |
| 15.17 | 3172.56 |
| 15.18 | 3155.22 |
| 15.19 | 3397.93 |
| 15.2  | 3259.24 |
| 15.21 | 3380.59 |
| 15.22 | 3259.24 |
| 15.23 | 3311.25 |
| 15.24 | 3276.57 |
| 15.25 | 2999.19 |
| 15.26 | 3207.23 |
| 15.27 | 3120.55 |
| 15.28 | 3345.92 |
| 15.29 | 3571.29 |
| 15.3  | 3484.61 |
| 15.31 | 2929.85 |
| 15.32 | 3415.26 |
| 15.33 | 3449.94 |
| 15.34 | 3779.33 |
| 15.35 | 3259.24 |
| 15.36 | 2791.16 |
| 15.37 | 3449.94 |
| 15.38 | 3397.93 |
| 15.39 | 3103.21 |
| 15.4  | 3311.25 |
| 15.41 | 3172.56 |
| 15.42 | 3016.53 |
| 15.43 | 2808.49 |
| 15.44 | 3103.21 |
| 15.45 | 3172.56 |
| 15.46 | 3189.89 |
| 15.47 | 3276.57 |
| 15.48 | 2981.86 |
| 15.49 | 2912.51 |
| 15.5  | 2999.19 |
| 15.51 | 2877.84 |
| 15.52 | 3172.56 |
| 15.53 | 3172.56 |
| 15.54 | 3085.87 |
| 15.55 | 3103.21 |
| 15.56 | 3484.61 |
| 15.57 | 3779.33 |
| 15.58 | 3449.94 |
| 15.59 | 3207.23 |

|       |         |
|-------|---------|
| 15.6  | 2964.52 |
| 15.61 | 3380.59 |
| 15.62 | 3449.94 |
| 15.63 | 3103.21 |
| 15.64 | 3536.62 |
| 15.65 | 2981.86 |
| 15.66 | 3241.9  |
| 15.67 | 3345.92 |
| 15.68 | 3467.27 |
| 15.69 | 3172.56 |
| 15.7  | 3120.55 |
| 15.71 | 3241.9  |
| 15.72 | 3345.92 |
| 15.73 | 3657.97 |
| 15.74 | 3293.91 |
| 15.75 | 3172.56 |
| 15.76 | 3553.96 |
| 15.77 | 2825.83 |
| 15.78 | 3415.26 |
| 15.79 | 3449.94 |
| 15.8  | 3397.93 |
| 15.81 | 3137.88 |
| 15.82 | 2756.48 |
| 15.83 | 3380.59 |
| 15.84 | 2583.12 |
| 15.85 | 3189.89 |
| 15.86 | 3363.26 |
| 15.87 | 2964.52 |
| 15.88 | 3155.22 |
| 15.89 | 3467.27 |
| 15.9  | 3519.28 |
| 15.91 | 2756.48 |
| 15.92 | 2947.18 |
| 15.93 | 3467.27 |
| 15.94 | 3276.57 |
| 15.95 | 3380.59 |
| 15.96 | 2981.86 |
| 15.97 | 3241.9  |
| 15.98 | 3432.6  |
| 15.99 | 3085.87 |
| 16    | 3484.61 |
| 16.01 | 3189.89 |
| 16.02 | 3675.31 |
| 16.03 | 3484.61 |



|       |         |
|-------|---------|
| 16.04 | 3311.25 |
| 16.05 | 3449.94 |
| 16.06 | 3241.9  |
| 16.07 | 3172.56 |
| 16.08 | 2929.85 |
| 16.09 | 3588.63 |
| 16.1  | 3293.91 |
| 16.11 | 3207.23 |
| 16.12 | 3085.87 |
| 16.13 | 3605.97 |
| 16.14 | 3449.94 |
| 16.15 | 3224.56 |
| 16.16 | 2964.52 |
| 16.17 | 3449.94 |
| 16.18 | 3189.89 |
| 16.19 | 2947.18 |
| 16.2  | 3189.89 |
| 16.21 | 3311.25 |
| 16.22 | 3345.92 |
| 16.23 | 2947.18 |
| 16.24 | 3085.87 |
| 16.25 | 3016.53 |
| 16.26 | 2999.19 |
| 16.27 | 2773.82 |
| 16.28 | 3155.22 |
| 16.29 | 3467.27 |
| 16.3  | 3293.91 |
| 16.31 | 2929.85 |
| 16.32 | 3553.96 |
| 16.33 | 2912.51 |
| 16.34 | 3189.89 |
| 16.35 | 3415.26 |
| 16.36 | 3293.91 |
| 16.37 | 2721.81 |
| 16.38 | 3207.23 |
| 16.39 | 3224.56 |
| 16.4  | 3155.22 |
| 16.41 | 3345.92 |
| 16.42 | 2981.86 |
| 16.43 | 3085.87 |
| 16.44 | 3120.55 |
| 16.45 | 3449.94 |
| 16.46 | 3189.89 |
| 16.47 | 3467.27 |

|       |         |
|-------|---------|
| 16.48 | 3467.27 |
| 16.49 | 2912.51 |
| 16.5  | 3155.22 |
| 16.51 | 2496.44 |
| 16.52 | 3311.25 |
| 16.53 | 3363.26 |
| 16.54 | 3120.55 |
| 16.55 | 3259.24 |
| 16.56 | 2947.18 |
| 16.57 | 3571.29 |
| 16.58 | 3449.94 |
| 16.59 | 2947.18 |
| 16.6  | 3484.61 |
| 16.61 | 3068.54 |
| 16.62 | 3033.86 |
| 16.63 | 2860.5  |
| 16.64 | 3051.2  |
| 16.65 | 3033.86 |
| 16.66 | 3016.53 |
| 16.67 | 2860.5  |
| 16.68 | 2947.18 |
| 16.69 | 3207.23 |
| 16.7  | 3293.91 |
| 16.71 | 3328.58 |
| 16.72 | 2565.78 |
| 16.73 | 2947.18 |
| 16.74 | 2583.12 |
| 16.75 | 3172.56 |
| 16.76 | 3137.88 |
| 16.77 | 2877.84 |
| 16.78 | 2825.83 |
| 16.79 | 3519.28 |
| 16.8  | 3051.2  |
| 16.81 | 2895.17 |
| 16.82 | 3103.21 |
| 16.83 | 3085.87 |
| 16.84 | 3120.55 |
| 16.85 | 3033.86 |
| 16.86 | 3415.26 |
| 16.87 | 3259.24 |
| 16.88 | 3276.57 |
| 16.89 | 3449.94 |
| 16.9  | 3224.56 |
| 16.91 | 2981.86 |

|       |         |
|-------|---------|
| 16.92 | 3016.53 |
| 16.93 | 3397.93 |
| 16.94 | 3207.23 |
| 16.95 | 3033.86 |
| 16.96 | 2947.18 |
| 16.97 | 3137.88 |
| 16.98 | 3103.21 |
| 16.99 | 2947.18 |
| 17    | 3224.56 |
| 17.01 | 3033.86 |
| 17.02 | 3137.88 |
| 17.03 | 3467.27 |
| 17.04 | 3172.56 |
| 17.05 | 3328.58 |
| 17.06 | 2739.15 |
| 17.07 | 3085.87 |
| 17.08 | 3241.9  |
| 17.09 | 3033.86 |
| 17.1  | 2964.52 |
| 17.11 | 3137.88 |
| 17.12 | 3293.91 |
| 17.13 | 2999.19 |
| 17.14 | 3467.27 |
| 17.15 | 3189.89 |
| 17.16 | 2981.86 |
| 17.17 | 3051.2  |
| 17.18 | 2860.5  |
| 17.19 | 2929.85 |
| 17.2  | 2964.52 |
| 17.21 | 3605.97 |
| 17.22 | 2895.17 |
| 17.23 | 3068.54 |
| 17.24 | 3016.53 |
| 17.25 | 2860.5  |
| 17.26 | 3224.56 |
| 17.27 | 3016.53 |
| 17.28 | 3016.53 |
| 17.29 | 3189.89 |
| 17.3  | 3155.22 |
| 17.31 | 3293.91 |
| 17.32 | 2999.19 |
| 17.33 | 3120.55 |
| 17.34 | 3085.87 |
| 17.35 | 3068.54 |

|       |         |
|-------|---------|
| 17.36 | 2947.18 |
| 17.37 | 3484.61 |
| 17.38 | 3328.58 |
| 17.39 | 3033.86 |
| 17.4  | 2999.19 |
| 17.41 | 2669.8  |
| 17.42 | 3137.88 |
| 17.43 | 2756.48 |
| 17.44 | 2808.49 |
| 17.45 | 2999.19 |
| 17.46 | 2999.19 |
| 17.47 | 2912.51 |
| 17.48 | 3068.54 |
| 17.49 | 2877.84 |
| 17.5  | 2981.86 |
| 17.51 | 3016.53 |
| 17.52 | 2947.18 |
| 17.53 | 2877.84 |
| 17.54 | 3051.2  |
| 17.55 | 2721.81 |
| 17.56 | 2947.18 |
| 17.57 | 3172.56 |
| 17.58 | 3137.88 |
| 17.59 | 3467.27 |
| 17.6  | 3293.91 |
| 17.61 | 3120.55 |
| 17.62 | 2999.19 |
| 17.63 | 2929.85 |
| 17.64 | 2912.51 |
| 17.65 | 2912.51 |
| 17.66 | 2947.18 |
| 17.67 | 2652.46 |
| 17.68 | 2687.14 |
| 17.69 | 3553.96 |
| 17.7  | 2929.85 |
| 17.71 | 3103.21 |
| 17.72 | 3137.88 |
| 17.73 | 2825.83 |
| 17.74 | 2912.51 |
| 17.75 | 2791.16 |
| 17.76 | 2947.18 |
| 17.77 | 2912.51 |
| 17.78 | 2929.85 |
| 17.79 | 3103.21 |

|       |         |
|-------|---------|
| 17.8  | 2565.78 |
| 17.81 | 3189.89 |
| 17.82 | 3380.59 |
| 17.83 | 2981.86 |
| 17.84 | 2877.84 |
| 17.85 | 3207.23 |
| 17.86 | 3085.87 |
| 17.87 | 2947.18 |
| 17.88 | 2964.52 |
| 17.89 | 2895.17 |
| 17.9  | 2981.86 |
| 17.91 | 2895.17 |
| 17.92 | 3033.86 |
| 17.93 | 3103.21 |
| 17.94 | 3432.6  |
| 17.95 | 2947.18 |
| 17.96 | 2548.45 |
| 17.97 | 2721.81 |
| 17.98 | 3137.88 |
| 17.99 | 2825.83 |
| 18    | 3293.91 |
| 18.01 | 3068.54 |
| 18.02 | 3068.54 |
| 18.03 | 3224.56 |
| 18.04 | 2999.19 |
| 18.05 | 3085.87 |
| 18.06 | 2687.14 |
| 18.07 | 2912.51 |
| 18.08 | 2877.84 |
| 18.09 | 2669.8  |
| 18.1  | 3068.54 |
| 18.11 | 3120.55 |
| 18.12 | 3051.2  |
| 18.13 | 3016.53 |
| 18.14 | 2739.15 |
| 18.15 | 3085.87 |
| 18.16 | 3016.53 |
| 18.17 | 2704.47 |
| 18.18 | 3103.21 |
| 18.19 | 2617.79 |
| 18.2  | 2687.14 |
| 18.21 | 2791.16 |
| 18.22 | 2860.5  |
| 18.23 | 2739.15 |

|       |         |
|-------|---------|
| 18.24 | 2687.14 |
| 18.25 | 2721.81 |
| 18.26 | 2583.12 |
| 18.27 | 2739.15 |
| 18.28 | 3085.87 |
| 18.29 | 2548.45 |
| 18.3  | 3120.55 |
| 18.31 | 2617.79 |
| 18.32 | 2947.18 |
| 18.33 | 2999.19 |
| 18.34 | 2843.16 |
| 18.35 | 2635.13 |
| 18.36 | 2704.47 |
| 18.37 | 3311.25 |
| 18.38 | 3033.86 |
| 18.39 | 3068.54 |
| 18.4  | 3033.86 |
| 18.41 | 2895.17 |
| 18.42 | 2999.19 |
| 18.43 | 3189.89 |
| 18.44 | 2808.49 |
| 18.45 | 2964.52 |
| 18.46 | 3189.89 |
| 18.47 | 3137.88 |
| 18.48 | 2756.48 |
| 18.49 | 2652.46 |
| 18.5  | 3553.96 |
| 18.51 | 3172.56 |
| 18.52 | 2721.81 |
| 18.53 | 2687.14 |
| 18.54 | 3051.2  |
| 18.55 | 3016.53 |
| 18.56 | 3068.54 |
| 18.57 | 2825.83 |
| 18.58 | 3068.54 |
| 18.59 | 3120.55 |
| 18.6  | 2929.85 |
| 18.61 | 3241.9  |
| 18.62 | 2999.19 |
| 18.63 | 3363.26 |
| 18.64 | 2704.47 |
| 18.65 | 2947.18 |
| 18.66 | 2565.78 |
| 18.67 | 2964.52 |

|       |         |
|-------|---------|
| 18.68 | 2947.18 |
| 18.69 | 2635.13 |
| 18.7  | 2479.1  |
| 18.71 | 2877.84 |
| 18.72 | 2929.85 |
| 18.73 | 3068.54 |
| 18.74 | 2739.15 |
| 18.75 | 3137.88 |
| 18.76 | 3259.24 |
| 18.77 | 3155.22 |
| 18.78 | 2981.86 |
| 18.79 | 2877.84 |
| 18.8  | 2999.19 |
| 18.81 | 2825.83 |
| 18.82 | 2791.16 |
| 18.83 | 2929.85 |
| 18.84 | 2929.85 |
| 18.85 | 2721.81 |
| 18.86 | 2999.19 |
| 18.87 | 2999.19 |
| 18.88 | 3033.86 |
| 18.89 | 3224.56 |
| 18.9  | 2999.19 |
| 18.91 | 2929.85 |
| 18.92 | 3207.23 |
| 18.93 | 2860.5  |
| 18.94 | 3120.55 |
| 18.95 | 3137.88 |
| 18.96 | 3051.2  |
| 18.97 | 3207.23 |
| 18.98 | 2964.52 |
| 18.99 | 2808.49 |
| 19    | 2843.16 |
| 19.01 | 3103.21 |
| 19.02 | 3536.62 |
| 19.03 | 3068.54 |
| 19.04 | 3501.95 |
| 19.05 | 3189.89 |
| 19.06 | 3605.97 |
| 19.07 | 3536.62 |
| 19.08 | 3536.62 |
| 19.09 | 3016.53 |
| 19.1  | 3155.22 |
| 19.11 | 3155.22 |

|       |         |
|-------|---------|
| 19.12 | 3120.55 |
| 19.13 | 2773.82 |
| 19.14 | 3051.2  |
| 19.15 | 2964.52 |
| 19.16 | 3293.91 |
| 19.17 | 2964.52 |
| 19.18 | 2791.16 |
| 19.19 | 2773.82 |
| 19.2  | 3207.23 |
| 19.21 | 3484.61 |
| 19.22 | 2964.52 |
| 19.23 | 3224.56 |
| 19.24 | 2825.83 |
| 19.25 | 2843.16 |
| 19.26 | 3033.86 |
| 19.27 | 2773.82 |
| 19.28 | 2895.17 |
| 19.29 | 2877.84 |
| 19.3  | 3051.2  |
| 19.31 | 2825.83 |
| 19.32 | 3276.57 |
| 19.33 | 3276.57 |
| 19.34 | 3137.88 |
| 19.35 | 2877.84 |
| 19.36 | 3016.53 |
| 19.37 | 3068.54 |
| 19.38 | 2773.82 |
| 19.39 | 3016.53 |
| 19.4  | 3051.2  |
| 19.41 | 2773.82 |
| 19.42 | 2860.5  |
| 19.43 | 2739.15 |
| 19.44 | 2756.48 |
| 19.45 | 2669.8  |
| 19.46 | 3016.53 |
| 19.47 | 2964.52 |
| 19.48 | 2825.83 |
| 19.49 | 2860.5  |
| 19.5  | 3276.57 |
| 19.51 | 2912.51 |
| 19.52 | 2895.17 |
| 19.53 | 2669.8  |
| 19.54 | 2843.16 |
| 19.55 | 2721.81 |



|       |         |
|-------|---------|
| 19.56 | 2617.79 |
| 19.57 | 2583.12 |
| 19.58 | 3224.56 |
| 19.59 | 2929.85 |
| 19.6  | 3120.55 |
| 19.61 | 2808.49 |
| 19.62 | 2721.81 |
| 19.63 | 3016.53 |
| 19.64 | 3033.86 |
| 19.65 | 2929.85 |
| 19.66 | 3085.87 |
| 19.67 | 3276.57 |
| 19.68 | 2808.49 |
| 19.69 | 2999.19 |
| 19.7  | 2704.47 |
| 19.71 | 2635.13 |
| 19.72 | 3259.24 |
| 19.73 | 3120.55 |
| 19.74 | 2721.81 |
| 19.75 | 3172.56 |
| 19.76 | 2791.16 |
| 19.77 | 2947.18 |
| 19.78 | 2721.81 |
| 19.79 | 2808.49 |
| 19.8  | 2843.16 |
| 19.81 | 3189.89 |
| 19.82 | 2808.49 |
| 19.83 | 2825.83 |
| 19.84 | 2513.77 |
| 19.85 | 2825.83 |
| 19.86 | 2669.8  |
| 19.87 | 3103.21 |
| 19.88 | 2860.5  |
| 19.89 | 2808.49 |
| 19.9  | 3397.93 |
| 19.91 | 2773.82 |
| 19.92 | 3120.55 |
| 19.93 | 3189.89 |
| 19.94 | 2791.16 |
| 19.95 | 2773.82 |
| 19.96 | 2565.78 |
| 19.97 | 2739.15 |
| 19.98 | 2635.13 |
| 19.99 | 3276.57 |

|       |         |
|-------|---------|
| 20    | 2895.17 |
| 20.01 | 3137.88 |
| 20.02 | 3415.26 |
| 20.03 | 2825.83 |
| 20.04 | 2912.51 |
| 20.05 | 3033.86 |
| 20.06 | 3085.87 |
| 20.07 | 2704.47 |
| 20.08 | 2981.86 |
| 20.09 | 2687.14 |
| 20.1  | 2912.51 |
| 20.11 | 2600.46 |
| 20.12 | 2964.52 |
| 20.13 | 2999.19 |
| 20.14 | 2895.17 |
| 20.15 | 2843.16 |
| 20.16 | 2877.84 |
| 20.17 | 2895.17 |
| 20.18 | 3380.59 |
| 20.19 | 3380.59 |
| 20.2  | 2981.86 |
| 20.21 | 3276.57 |
| 20.22 | 3259.24 |
| 20.23 | 3259.24 |
| 20.24 | 3103.21 |
| 20.25 | 3051.2  |
| 20.26 | 2773.82 |
| 20.27 | 3311.25 |
| 20.28 | 3155.22 |
| 20.29 | 3501.95 |
| 20.3  | 3172.56 |
| 20.31 | 3345.92 |
| 20.32 | 2999.19 |
| 20.33 | 3449.94 |
| 20.34 | 3900.68 |
| 20.35 | 3657.97 |
| 20.36 | 3293.91 |
| 20.37 | 3761.99 |
| 20.38 | 3501.95 |
| 20.39 | 3970.03 |
| 20.4  | 3935.36 |
| 20.41 | 3779.33 |
| 20.42 | 4074.05 |
| 20.43 | 3796.67 |

|       |         |
|-------|---------|
| 20.44 | 3848.67 |
| 20.45 | 3918.02 |
| 20.46 | 4230.07 |
| 20.47 | 4230.07 |
| 20.48 | 4247.41 |
| 20.49 | 3432.6  |
| 20.5  | 3588.63 |
| 20.51 | 4004.7  |
| 20.52 | 3293.91 |
| 20.53 | 3467.27 |
| 20.54 | 2895.17 |
| 20.55 | 3172.56 |
| 20.56 | 3103.21 |
| 20.57 | 2981.86 |
| 20.58 | 3640.64 |
| 20.59 | 3363.26 |
| 20.6  | 3207.23 |
| 20.61 | 3137.88 |
| 20.62 | 3051.2  |
| 20.63 | 3068.54 |
| 20.64 | 3519.28 |
| 20.65 | 3085.87 |
| 20.66 | 3519.28 |
| 20.67 | 3068.54 |
| 20.68 | 3016.53 |
| 20.69 | 2981.86 |
| 20.7  | 2687.14 |
| 20.71 | 2635.13 |
| 20.72 | 3033.86 |
| 20.73 | 3207.23 |
| 20.74 | 3137.88 |
| 20.75 | 3137.88 |
| 20.76 | 3120.55 |
| 20.77 | 2981.86 |
| 20.78 | 2929.85 |
| 20.79 | 3068.54 |
| 20.8  | 2531.11 |
| 20.81 | 2895.17 |
| 20.82 | 2773.82 |
| 20.83 | 2947.18 |
| 20.84 | 2877.84 |
| 20.85 | 2912.51 |
| 20.86 | 3241.9  |
| 20.87 | 3207.23 |

|       |         |
|-------|---------|
| 20.88 | 3172.56 |
| 20.89 | 2877.84 |
| 20.9  | 2999.19 |
| 20.91 | 2669.8  |
| 20.92 | 3345.92 |
| 20.93 | 3103.21 |
| 20.94 | 3068.54 |
| 20.95 | 3103.21 |
| 20.96 | 3051.2  |
| 20.97 | 3571.29 |
| 20.98 | 3172.56 |
| 20.99 | 3120.55 |
| 21    | 2877.84 |
| 21.01 | 3189.89 |
| 21.02 | 3345.92 |
| 21.03 | 3328.58 |
| 21.04 | 3484.61 |
| 21.05 | 3172.56 |
| 21.06 | 3103.21 |
| 21.07 | 2860.5  |
| 21.08 | 2704.47 |
| 21.09 | 3241.9  |
| 21.1  | 2825.83 |
| 21.11 | 3155.22 |
| 21.12 | 2808.49 |
| 21.13 | 2895.17 |
| 21.14 | 2843.16 |
| 21.15 | 2877.84 |
| 21.16 | 3727.32 |
| 21.17 | 3085.87 |
| 21.18 | 2791.16 |
| 21.19 | 3155.22 |
| 21.2  | 2773.82 |
| 21.21 | 2791.16 |
| 21.22 | 3051.2  |
| 21.23 | 3051.2  |
| 21.24 | 2756.48 |
| 21.25 | 3380.59 |
| 21.26 | 2964.52 |
| 21.27 | 2929.85 |
| 21.28 | 2843.16 |
| 21.29 | 2600.46 |
| 21.3  | 2981.86 |
| 21.31 | 2756.48 |

|       |         |
|-------|---------|
| 21.32 | 2999.19 |
| 21.33 | 2739.15 |
| 21.34 | 3016.53 |
| 21.35 | 3241.9  |
| 21.36 | 2929.85 |
| 21.37 | 2895.17 |
| 21.38 | 2895.17 |
| 21.39 | 2808.49 |
| 21.4  | 2964.52 |
| 21.41 | 3137.88 |
| 21.42 | 3415.26 |
| 21.43 | 2721.81 |
| 21.44 | 2704.47 |
| 21.45 | 2947.18 |
| 21.46 | 2704.47 |
| 21.47 | 3345.92 |
| 21.48 | 3224.56 |
| 21.49 | 2964.52 |
| 21.5  | 2877.84 |
| 21.51 | 2808.49 |
| 21.52 | 2756.48 |
| 21.53 | 3120.55 |
| 21.54 | 3363.26 |
| 21.55 | 2877.84 |
| 21.56 | 3137.88 |
| 21.57 | 3345.92 |
| 21.58 | 3137.88 |
| 21.59 | 3241.9  |
| 21.6  | 3276.57 |
| 21.61 | 3051.2  |
| 21.62 | 3363.26 |
| 21.63 | 3241.9  |
| 21.64 | 2739.15 |
| 21.65 | 2999.19 |
| 21.66 | 3120.55 |
| 21.67 | 3016.53 |
| 21.68 | 3068.54 |
| 21.69 | 3241.9  |
| 21.7  | 2825.83 |
| 21.71 | 3172.56 |
| 21.72 | 3103.21 |
| 21.73 | 2929.85 |
| 21.74 | 3137.88 |
| 21.75 | 3155.22 |

|       |         |
|-------|---------|
| 21.76 | 2912.51 |
| 21.77 | 3068.54 |
| 21.78 | 2825.83 |
| 21.79 | 2825.83 |
| 21.8  | 2756.48 |
| 21.81 | 2964.52 |
| 21.82 | 2652.46 |
| 21.83 | 2860.5  |
| 21.84 | 3085.87 |
| 21.85 | 3033.86 |
| 21.86 | 3103.21 |
| 21.87 | 2964.52 |
| 21.88 | 3120.55 |
| 21.89 | 3259.24 |
| 21.9  | 3467.27 |
| 21.91 | 2843.16 |
| 21.92 | 3207.23 |
| 21.93 | 2947.18 |
| 21.94 | 3085.87 |
| 21.95 | 3085.87 |
| 21.96 | 3276.57 |
| 21.97 | 3137.88 |
| 21.98 | 3016.53 |
| 21.99 | 3727.32 |
| 22    | 3241.9  |
| 22.01 | 3224.56 |
| 22.02 | 2843.16 |
| 22.03 | 3033.86 |
| 22.04 | 3311.25 |
| 22.05 | 3345.92 |
| 22.06 | 2912.51 |
| 22.07 | 2999.19 |
| 22.08 | 3328.58 |
| 22.09 | 3120.55 |
| 22.1  | 3380.59 |
| 22.11 | 3345.92 |
| 22.12 | 3276.57 |
| 22.13 | 3120.55 |
| 22.14 | 3224.56 |
| 22.15 | 3051.2  |
| 22.16 | 3311.25 |
| 22.17 | 3207.23 |
| 22.18 | 3085.87 |
| 22.19 | 2964.52 |

|       |         |
|-------|---------|
| 22.2  | 2843.16 |
| 22.21 | 3068.54 |
| 22.22 | 3276.57 |
| 22.23 | 3033.86 |
| 22.24 | 3328.58 |
| 22.25 | 2999.19 |
| 22.26 | 3293.91 |
| 22.27 | 3103.21 |
| 22.28 | 2964.52 |
| 22.29 | 2964.52 |
| 22.3  | 3397.93 |
| 22.31 | 3120.55 |
| 22.32 | 3051.2  |
| 22.33 | 3293.91 |
| 22.34 | 3276.57 |
| 22.35 | 3276.57 |
| 22.36 | 2895.17 |
| 22.37 | 3120.55 |
| 22.38 | 3172.56 |
| 22.39 | 3068.54 |
| 22.4  | 2964.52 |
| 22.41 | 3224.56 |
| 22.42 | 2999.19 |
| 22.43 | 3345.92 |
| 22.44 | 3189.89 |
| 22.45 | 3155.22 |
| 22.46 | 3051.2  |
| 22.47 | 3085.87 |
| 22.48 | 2860.5  |
| 22.49 | 3432.6  |
| 22.5  | 2895.17 |
| 22.51 | 3172.56 |
| 22.52 | 2808.49 |
| 22.53 | 3085.87 |
| 22.54 | 3189.89 |
| 22.55 | 2791.16 |
| 22.56 | 3432.6  |
| 22.57 | 3120.55 |
| 22.58 | 3103.21 |
| 22.59 | 3328.58 |
| 22.6  | 3189.89 |
| 22.61 | 3293.91 |
| 22.62 | 3779.33 |
| 22.63 | 3467.27 |

|       |         |
|-------|---------|
| 22.64 | 3328.58 |
| 22.65 | 3189.89 |
| 22.66 | 3120.55 |
| 22.67 | 3276.57 |
| 22.68 | 3051.2  |
| 22.69 | 3363.26 |
| 22.7  | 3016.53 |
| 22.71 | 3345.92 |
| 22.72 | 3259.24 |
| 22.73 | 3449.94 |
| 22.74 | 2912.51 |
| 22.75 | 3744.66 |
| 22.76 | 3328.58 |
| 22.77 | 3259.24 |
| 22.78 | 3033.86 |
| 22.79 | 3415.26 |
| 22.8  | 3380.59 |
| 22.81 | 3432.6  |
| 22.82 | 3657.97 |
| 22.83 | 3293.91 |
| 22.84 | 3796.67 |
| 22.85 | 3605.97 |
| 22.86 | 4160.73 |
| 22.87 | 3935.36 |
| 22.88 | 3467.27 |
| 22.89 | 3692.65 |
| 22.9  | 3571.29 |
| 22.91 | 3952.69 |
| 22.92 | 3553.96 |
| 22.93 | 3623.3  |
| 22.94 | 3952.69 |
| 22.95 | 3918.02 |
| 22.96 | 3918.02 |
| 22.97 | 4178.07 |
| 22.98 | 4299.42 |
| 22.99 | 4334.09 |
| 23    | 4455.45 |
| 23.01 | 4455.45 |
| 23.02 | 4628.81 |
| 23.03 | 4732.83 |
| 23.04 | 5582.31 |
| 23.05 | 5599.65 |
| 23.06 | 5998.38 |
| 23.07 | 5807.68 |



|       |         |
|-------|---------|
| 23.08 | 6535.81 |
| 23.09 | 6483.8  |
| 23.1  | 7437.3  |
| 23.11 | 7662.68 |
| 23.12 | 8789.54 |
| 23.13 | 7940.06 |
| 23.14 | 9032.25 |
| 23.15 | 8702.86 |
| 23.16 | 9396.31 |
| 23.17 | 9465.66 |
| 23.18 | 10661.9 |
| 23.19 | 10956.6 |
| 23.2  | 11407.3 |
| 23.21 | 11944.8 |
| 23.22 | 11632.7 |
| 23.23 | 11303.3 |
| 23.24 | 11147.3 |
| 23.25 | 10540.5 |
| 23.26 | 10609.9 |
| 23.27 | 10297.8 |
| 23.28 | 9517.67 |
| 23.29 | 9049.58 |
| 23.3  | 8321.46 |
| 23.31 | 7714.69 |
| 23.32 | 6847.87 |
| 23.33 | 7402.63 |
| 23.34 | 6067.73 |
| 23.35 | 5651.66 |
| 23.36 | 5200.91 |
| 23.37 | 5634.32 |
| 23.38 | 5426.28 |
| 23.39 | 5356.94 |
| 23.4  | 5200.91 |
| 23.41 | 4680.82 |
| 23.42 | 4386.1  |
| 23.43 | 4455.45 |
| 23.44 | 4420.77 |
| 23.45 | 4056.71 |
| 23.46 | 4368.77 |
| 23.47 | 4108.72 |
| 23.48 | 3883.35 |
| 23.49 | 3449.94 |
| 23.5  | 3831.34 |
| 23.51 | 3692.65 |

|       |         |
|-------|---------|
| 23.52 | 3605.97 |
| 23.53 | 3501.95 |
| 23.54 | 3536.62 |
| 23.55 | 3207.23 |
| 23.56 | 3536.62 |
| 23.57 | 3675.31 |
| 23.58 | 3449.94 |
| 23.59 | 3501.95 |
| 23.6  | 3415.26 |
| 23.61 | 3224.56 |
| 23.62 | 3640.64 |
| 23.63 | 3397.93 |
| 23.64 | 3640.64 |
| 23.65 | 3328.58 |
| 23.66 | 3311.25 |
| 23.67 | 3519.28 |
| 23.68 | 3571.29 |
| 23.69 | 3484.61 |
| 23.7  | 3588.63 |
| 23.71 | 3276.57 |
| 23.72 | 3501.95 |
| 23.73 | 3345.92 |
| 23.74 | 3276.57 |
| 23.75 | 3501.95 |
| 23.76 | 2912.51 |
| 23.77 | 3640.64 |
| 23.78 | 3380.59 |
| 23.79 | 3709.98 |
| 23.8  | 3449.94 |
| 23.81 | 3189.89 |
| 23.82 | 3241.9  |
| 23.83 | 3016.53 |
| 23.84 | 3363.26 |
| 23.85 | 3207.23 |
| 23.86 | 3103.21 |
| 23.87 | 3363.26 |
| 23.88 | 3501.95 |
| 23.89 | 3571.29 |
| 23.9  | 3588.63 |
| 23.91 | 3172.56 |
| 23.92 | 3241.9  |
| 23.93 | 2860.5  |
| 23.94 | 3432.6  |
| 23.95 | 4056.71 |

|       |         |
|-------|---------|
| 23.96 | 3207.23 |
| 23.97 | 3727.32 |
| 23.98 | 3276.57 |
| 23.99 | 3241.9  |
| 24    | 3432.6  |
| 24.01 | 3519.28 |
| 24.02 | 3293.91 |
| 24.03 | 3397.93 |
| 24.04 | 3328.58 |
| 24.05 | 3120.55 |
| 24.06 | 3085.87 |
| 24.07 | 3276.57 |
| 24.08 | 3588.63 |
| 24.09 | 3588.63 |
| 24.1  | 3467.27 |
| 24.11 | 3224.56 |
| 24.12 | 3224.56 |
| 24.13 | 3276.57 |
| 24.14 | 3085.87 |
| 24.15 | 3293.91 |
| 24.16 | 3501.95 |
| 24.17 | 3189.89 |
| 24.18 | 3033.86 |
| 24.19 | 3553.96 |
| 24.2  | 3224.56 |
| 24.21 | 3467.27 |
| 24.22 | 3692.65 |
| 24.23 | 3189.89 |
| 24.24 | 3172.56 |
| 24.25 | 3432.6  |
| 24.26 | 3311.25 |
| 24.27 | 3744.66 |
| 24.28 | 3172.56 |
| 24.29 | 3501.95 |
| 24.3  | 3484.61 |
| 24.31 | 3224.56 |
| 24.32 | 3259.24 |
| 24.33 | 3276.57 |
| 24.34 | 3432.6  |
| 24.35 | 3276.57 |
| 24.36 | 3085.87 |
| 24.37 | 3207.23 |
| 24.38 | 3241.9  |
| 24.39 | 3259.24 |

|       |         |
|-------|---------|
| 24.4  | 3172.56 |
| 24.41 | 3605.97 |
| 24.42 | 3501.95 |
| 24.43 | 3345.92 |
| 24.44 | 3432.6  |
| 24.45 | 3640.64 |
| 24.46 | 3311.25 |
| 24.47 | 2895.17 |
| 24.48 | 3241.9  |
| 24.49 | 3571.29 |
| 24.5  | 2791.16 |
| 24.51 | 3085.87 |
| 24.52 | 3207.23 |
| 24.53 | 2704.47 |
| 24.54 | 3519.28 |
| 24.55 | 3623.3  |
| 24.56 | 3085.87 |
| 24.57 | 3259.24 |
| 24.58 | 3536.62 |
| 24.59 | 3276.57 |
| 24.6  | 3415.26 |
| 24.61 | 3016.53 |
| 24.62 | 3692.65 |
| 24.63 | 3779.33 |
| 24.64 | 3536.62 |
| 24.65 | 3397.93 |
| 24.66 | 3276.57 |
| 24.67 | 3137.88 |
| 24.68 | 3432.6  |
| 24.69 | 3484.61 |
| 24.7  | 3137.88 |
| 24.71 | 3189.89 |
| 24.72 | 3484.61 |
| 24.73 | 2999.19 |
| 24.74 | 3744.66 |
| 24.75 | 3311.25 |
| 24.76 | 3259.24 |
| 24.77 | 3536.62 |
| 24.78 | 3501.95 |
| 24.79 | 3033.86 |
| 24.8  | 3345.92 |
| 24.81 | 3137.88 |
| 24.82 | 2895.17 |
| 24.83 | 3189.89 |

|       |         |
|-------|---------|
| 24.84 | 3415.26 |
| 24.85 | 3432.6  |
| 24.86 | 3571.29 |
| 24.87 | 3380.59 |
| 24.88 | 3519.28 |
| 24.89 | 3536.62 |
| 24.9  | 3363.26 |
| 24.91 | 3449.94 |
| 24.92 | 3415.26 |
| 24.93 | 3432.6  |
| 24.94 | 3276.57 |
| 24.95 | 3380.59 |
| 24.96 | 3640.64 |
| 24.97 | 3363.26 |
| 24.98 | 3536.62 |
| 24.99 | 3605.97 |
| 25    | 3709.98 |
| 25.01 | 3692.65 |
| 25.02 | 3536.62 |
| 25.03 | 3432.6  |
| 25.04 | 3259.24 |
| 25.05 | 3293.91 |
| 25.06 | 3380.59 |
| 25.07 | 3866.01 |
| 25.08 | 3120.55 |
| 25.09 | 3536.62 |
| 25.1  | 3155.22 |
| 25.11 | 3744.66 |
| 25.12 | 3432.6  |
| 25.13 | 3519.28 |
| 25.14 | 3467.27 |
| 25.15 | 3068.54 |
| 25.16 | 3293.91 |
| 25.17 | 3536.62 |
| 25.18 | 3224.56 |
| 25.19 | 2981.86 |
| 25.2  | 3536.62 |
| 25.21 | 3415.26 |
| 25.22 | 3709.98 |
| 25.23 | 3311.25 |
| 25.24 | 3571.29 |
| 25.25 | 3501.95 |
| 25.26 | 3241.9  |
| 25.27 | 3155.22 |

|       |         |
|-------|---------|
| 25.28 | 3380.59 |
| 25.29 | 2981.86 |
| 25.3  | 3103.21 |
| 25.31 | 3189.89 |
| 25.32 | 3779.33 |
| 25.33 | 3709.98 |
| 25.34 | 3796.67 |
| 25.35 | 3415.26 |
| 25.36 | 3467.27 |
| 25.37 | 3553.96 |
| 25.38 | 3605.97 |
| 25.39 | 3155.22 |
| 25.4  | 3449.94 |
| 25.41 | 3814    |
| 25.42 | 3155.22 |
| 25.43 | 2912.51 |
| 25.44 | 3189.89 |
| 25.45 | 3501.95 |
| 25.46 | 3293.91 |
| 25.47 | 3328.58 |
| 25.48 | 3033.86 |
| 25.49 | 3553.96 |
| 25.5  | 3380.59 |
| 25.51 | 3380.59 |
| 25.52 | 3449.94 |
| 25.53 | 3449.94 |
| 25.54 | 3033.86 |
| 25.55 | 3259.24 |
| 25.56 | 3397.93 |
| 25.57 | 2929.85 |
| 25.58 | 3276.57 |
| 25.59 | 3276.57 |
| 25.6  | 3328.58 |
| 25.61 | 3484.61 |
| 25.62 | 2999.19 |
| 25.63 | 3120.55 |
| 25.64 | 3363.26 |
| 25.65 | 3311.25 |
| 25.66 | 3744.66 |
| 25.67 | 2999.19 |
| 25.68 | 3189.89 |
| 25.69 | 3432.6  |
| 25.7  | 3623.3  |
| 25.71 | 3727.32 |

|       |         |
|-------|---------|
| 25.72 | 3918.02 |
| 25.73 | 3675.31 |
| 25.74 | 3796.67 |
| 25.75 | 3259.24 |
| 25.76 | 2912.51 |
| 25.77 | 3553.96 |
| 25.78 | 3501.95 |
| 25.79 | 3657.97 |
| 25.8  | 3657.97 |
| 25.81 | 3571.29 |
| 25.82 | 3276.57 |
| 25.83 | 3467.27 |
| 25.84 | 3709.98 |
| 25.85 | 3380.59 |
| 25.86 | 3328.58 |
| 25.87 | 3727.32 |
| 25.88 | 3918.02 |
| 25.89 | 3744.66 |
| 25.9  | 3571.29 |
| 25.91 | 3692.65 |
| 25.92 | 4074.05 |
| 25.93 | 4282.08 |
| 25.94 | 4212.74 |
| 25.95 | 4143.39 |
| 25.96 | 3328.58 |
| 25.97 | 4004.7  |
| 25.98 | 3657.97 |
| 25.99 | 4039.37 |
| 26    | 3935.36 |
| 26.01 | 4247.41 |
| 26.02 | 4576.8  |
| 26.03 | 3883.35 |
| 26.04 | 3848.67 |
| 26.05 | 4091.38 |
| 26.06 | 4195.4  |
| 26.07 | 3935.36 |
| 26.08 | 3744.66 |
| 26.09 | 3727.32 |
| 26.1  | 3761.99 |
| 26.11 | 4126.06 |
| 26.12 | 3640.64 |
| 26.13 | 3779.33 |
| 26.14 | 3709.98 |
| 26.15 | 3605.97 |

|       |         |
|-------|---------|
| 26.16 | 3519.28 |
| 26.17 | 3727.32 |
| 26.18 | 3935.36 |
| 26.19 | 3970.03 |
| 26.2  | 3501.95 |
| 26.21 | 3519.28 |
| 26.22 | 3380.59 |
| 26.23 | 3605.97 |
| 26.24 | 3536.62 |
| 26.25 | 3640.64 |
| 26.26 | 3848.67 |
| 26.27 | 3553.96 |
| 26.28 | 3345.92 |
| 26.29 | 3415.26 |
| 26.3  | 3380.59 |
| 26.31 | 3640.64 |
| 26.32 | 3831.34 |
| 26.33 | 3883.35 |
| 26.34 | 3900.68 |
| 26.35 | 3588.63 |
| 26.36 | 3415.26 |
| 26.37 | 3866.01 |
| 26.38 | 3709.98 |
| 26.39 | 3484.61 |
| 26.4  | 3484.61 |
| 26.41 | 4212.74 |
| 26.42 | 3831.34 |
| 26.43 | 3935.36 |
| 26.44 | 3675.31 |
| 26.45 | 4126.06 |
| 26.46 | 4195.4  |
| 26.47 | 3588.63 |
| 26.48 | 4143.39 |
| 26.49 | 3432.6  |
| 26.5  | 4022.04 |
| 26.51 | 3432.6  |
| 26.52 | 3709.98 |
| 26.53 | 4056.71 |
| 26.54 | 4715.49 |
| 26.55 | 4212.74 |
| 26.56 | 3900.68 |
| 26.57 | 4074.05 |
| 26.58 | 3848.67 |
| 26.59 | 4247.41 |



|       |         |
|-------|---------|
| 26.6  | 4559.47 |
| 26.61 | 4160.73 |
| 26.62 | 4524.79 |
| 26.63 | 4074.05 |
| 26.64 | 4368.77 |
| 26.65 | 4698.16 |
| 26.66 | 4195.4  |
| 26.67 | 4559.47 |
| 26.68 | 4386.1  |
| 26.69 | 4143.39 |
| 26.7  | 4403.44 |
| 26.71 | 3970.03 |
| 26.72 | 4143.39 |
| 26.73 | 3692.65 |
| 26.74 | 3866.01 |
| 26.75 | 3761.99 |
| 26.76 | 3848.67 |
| 26.77 | 3744.66 |
| 26.78 | 4178.07 |
| 26.79 | 3779.33 |
| 26.8  | 3640.64 |
| 26.81 | 3761.99 |
| 26.82 | 3727.32 |
| 26.83 | 3571.29 |
| 26.84 | 3796.67 |
| 26.85 | 3605.97 |
| 26.86 | 4056.71 |
| 26.87 | 3588.63 |
| 26.88 | 3588.63 |
| 26.89 | 3640.64 |
| 26.9  | 3172.56 |
| 26.91 | 3467.27 |
| 26.92 | 3848.67 |
| 26.93 | 3640.64 |
| 26.94 | 3363.26 |
| 26.95 | 3051.2  |
| 26.96 | 3501.95 |
| 26.97 | 3831.34 |
| 26.98 | 3103.21 |
| 26.99 | 3432.6  |
| 27    | 3605.97 |
| 27.01 | 3103.21 |
| 27.02 | 3415.26 |
| 27.03 | 3640.64 |

|       |         |
|-------|---------|
| 27.04 | 3605.97 |
| 27.05 | 3866.01 |
| 27.06 | 3657.97 |
| 27.07 | 3675.31 |
| 27.08 | 3276.57 |
| 27.09 | 3657.97 |
| 27.1  | 3224.56 |
| 27.11 | 3068.54 |
| 27.12 | 3484.61 |
| 27.13 | 3623.3  |
| 27.14 | 3605.97 |
| 27.15 | 3727.32 |
| 27.16 | 3380.59 |
| 27.17 | 3675.31 |
| 27.18 | 3900.68 |
| 27.19 | 4074.05 |
| 27.2  | 3657.97 |
| 27.21 | 3536.62 |
| 27.22 | 3900.68 |
| 27.23 | 3449.94 |
| 27.24 | 3241.9  |
| 27.25 | 3467.27 |
| 27.26 | 3415.26 |
| 27.27 | 3709.98 |
| 27.28 | 3623.3  |
| 27.29 | 3380.59 |
| 27.3  | 3675.31 |
| 27.31 | 3519.28 |
| 27.32 | 3224.56 |
| 27.33 | 3675.31 |
| 27.34 | 3137.88 |
| 27.35 | 3259.24 |
| 27.36 | 3345.92 |
| 27.37 | 3987.37 |
| 27.38 | 3571.29 |
| 27.39 | 3276.57 |
| 27.4  | 3623.3  |
| 27.41 | 3484.61 |
| 27.42 | 3380.59 |
| 27.43 | 3536.62 |
| 27.44 | 3536.62 |
| 27.45 | 3519.28 |
| 27.46 | 3883.35 |
| 27.47 | 3866.01 |

|       |         |
|-------|---------|
| 27.48 | 3866.01 |
| 27.49 | 3449.94 |
| 27.5  | 3484.61 |
| 27.51 | 3588.63 |
| 27.52 | 3397.93 |
| 27.53 | 3519.28 |
| 27.54 | 3675.31 |
| 27.55 | 3241.9  |
| 27.56 | 3519.28 |
| 27.57 | 4004.7  |
| 27.58 | 3553.96 |
| 27.59 | 3623.3  |
| 27.6  | 3692.65 |
| 27.61 | 3866.01 |
| 27.62 | 4056.71 |
| 27.63 | 3588.63 |
| 27.64 | 3293.91 |
| 27.65 | 3571.29 |
| 27.66 | 3363.26 |
| 27.67 | 3449.94 |
| 27.68 | 3432.6  |
| 27.69 | 3675.31 |
| 27.7  | 3155.22 |
| 27.71 | 3085.87 |
| 27.72 | 3623.3  |
| 27.73 | 3918.02 |
| 27.74 | 3189.89 |
| 27.75 | 3415.26 |
| 27.76 | 3120.55 |
| 27.77 | 3224.56 |
| 27.78 | 3207.23 |
| 27.79 | 3415.26 |
| 27.8  | 3675.31 |
| 27.81 | 3883.35 |
| 27.82 | 3692.65 |
| 27.83 | 3553.96 |
| 27.84 | 3779.33 |
| 27.85 | 3657.97 |
| 27.86 | 3189.89 |
| 27.87 | 3241.9  |
| 27.88 | 3016.53 |
| 27.89 | 3432.6  |
| 27.9  | 3363.26 |
| 27.91 | 3449.94 |

|       |         |
|-------|---------|
| 27.92 | 3571.29 |
| 27.93 | 3467.27 |
| 27.94 | 3224.56 |
| 27.95 | 3467.27 |
| 27.96 | 3484.61 |
| 27.97 | 3363.26 |
| 27.98 | 3588.63 |
| 27.99 | 3501.95 |
| 28    | 3657.97 |
| 28.01 | 3900.68 |
| 28.02 | 3553.96 |
| 28.03 | 3207.23 |
| 28.04 | 3605.97 |
| 28.05 | 3709.98 |
| 28.06 | 3311.25 |
| 28.07 | 3657.97 |
| 28.08 | 3935.36 |
| 28.09 | 3241.9  |
| 28.1  | 3657.97 |
| 28.11 | 3779.33 |
| 28.12 | 3779.33 |
| 28.13 | 3692.65 |
| 28.14 | 3623.3  |
| 28.15 | 3866.01 |
| 28.16 | 3519.28 |
| 28.17 | 3761.99 |
| 28.18 | 3761.99 |
| 28.19 | 3848.67 |
| 28.2  | 3588.63 |
| 28.21 | 3415.26 |
| 28.22 | 3501.95 |
| 28.23 | 3051.2  |
| 28.24 | 3484.61 |
| 28.25 | 3779.33 |
| 28.26 | 3709.98 |
| 28.27 | 3553.96 |
| 28.28 | 3640.64 |
| 28.29 | 3761.99 |
| 28.3  | 3605.97 |
| 28.31 | 3501.95 |
| 28.32 | 3814    |
| 28.33 | 3657.97 |
| 28.34 | 3918.02 |
| 28.35 | 3935.36 |

|       |         |
|-------|---------|
| 28.36 | 3484.61 |
| 28.37 | 3380.59 |
| 28.38 | 3519.28 |
| 28.39 | 3675.31 |
| 28.4  | 3796.67 |
| 28.41 | 3623.3  |
| 28.42 | 3796.67 |
| 28.43 | 3987.37 |
| 28.44 | 4056.71 |
| 28.45 | 4160.73 |
| 28.46 | 3900.68 |
| 28.47 | 3883.35 |
| 28.48 | 3831.34 |
| 28.49 | 3761.99 |
| 28.5  | 4022.04 |
| 28.51 | 4264.75 |
| 28.52 | 3883.35 |
| 28.53 | 4108.72 |
| 28.54 | 4195.4  |
| 28.55 | 4368.77 |
| 28.56 | 4282.08 |
| 28.57 | 4438.11 |
| 28.58 | 4160.73 |
| 28.59 | 4264.75 |
| 28.6  | 3918.02 |
| 28.61 | 4247.41 |
| 28.62 | 4368.77 |
| 28.63 | 4750.17 |
| 28.64 | 4836.85 |
| 28.65 | 4143.39 |
| 28.66 | 4715.49 |
| 28.67 | 4178.07 |
| 28.68 | 4680.82 |
| 28.69 | 5183.57 |
| 28.7  | 4455.45 |
| 28.71 | 4628.81 |
| 28.72 | 4524.79 |
| 28.73 | 4940.87 |
| 28.74 | 4940.87 |
| 28.75 | 4490.12 |
| 28.76 | 4386.1  |
| 28.77 | 5148.9  |
| 28.78 | 4628.81 |
| 28.79 | 4923.53 |

|       |         |
|-------|---------|
| 28.8  | 4854.18 |
| 28.81 | 5218.25 |
| 28.82 | 4334.09 |
| 28.83 | 4334.09 |
| 28.84 | 4802.17 |
| 28.85 | 4628.81 |
| 28.86 | 4074.05 |
| 28.87 | 4542.13 |
| 28.88 | 4836.85 |
| 28.89 | 4559.47 |
| 28.9  | 4542.13 |
| 28.91 | 4542.13 |
| 28.92 | 4854.18 |
| 28.93 | 4906.19 |
| 28.94 | 5148.9  |
| 28.95 | 4698.16 |
| 28.96 | 5010.21 |
| 28.97 | 5322.27 |
| 28.98 | 5721    |
| 28.99 | 5512.97 |
| 29    | 5304.93 |
| 29.01 | 5287.59 |
| 29.02 | 4663.48 |
| 29.03 | 5599.65 |
| 29.04 | 5356.94 |
| 29.05 | 5322.27 |
| 29.06 | 5686.33 |
| 29.07 | 5929.04 |
| 29.08 | 5686.33 |
| 29.09 | 5287.59 |
| 29.1  | 6015.72 |
| 29.11 | 6449.13 |
| 29.12 | 6570.48 |
| 29.13 | 6969.22 |
| 29.14 | 7333.28 |
| 29.15 | 7263.94 |
| 29.16 | 7523.98 |
| 29.17 | 7870.71 |
| 29.18 | 7992.07 |
| 29.19 | 8910.89 |
| 29.2  | 8910.89 |
| 29.21 | 9933.74 |
| 29.22 | 10037.8 |
| 29.23 | 10783.2 |

|       |         |
|-------|---------|
| 29.24 | 10679.2 |
| 29.25 | 11528.7 |
| 29.26 | 11806.1 |
| 29.27 | 13366.3 |
| 29.28 | 13453   |
| 29.29 | 14822.6 |
| 29.3  | 16504.2 |
| 29.31 | 17232.4 |
| 29.32 | 19226   |
| 29.33 | 20508.9 |
| 29.34 | 21254.4 |
| 29.35 | 23664.1 |
| 29.36 | 25761.8 |
| 29.37 | 26819.4 |
| 29.38 | 30217.3 |
| 29.39 | 32540.4 |
| 29.4  | 35973   |
| 29.41 | 38313.4 |
| 29.42 | 43236.9 |
| 29.43 | 47258.9 |
| 29.44 | 52979.9 |
| 29.45 | 57556.8 |
| 29.46 | 63919.2 |
| 29.47 | 69882.9 |
| 29.48 | 76002.6 |
| 29.49 | 80631.5 |
| 29.5  | 86716.5 |
| 29.51 | 96130.2 |
| 29.52 | 102042  |
| 29.53 | 108092  |
| 29.54 | 110918  |
| 29.55 | 112097  |
| 29.56 | 111369  |
| 29.57 | 110485  |
| 29.58 | 107035  |
| 29.59 | 103446  |
| 29.6  | 97742.5 |
| 29.61 | 94465.9 |
| 29.62 | 89282.3 |
| 29.63 | 84618.8 |
| 29.64 | 80492.8 |
| 29.65 | 72864.8 |
| 29.66 | 66866.4 |
| 29.67 | 59585.1 |

|       |         |
|-------|---------|
| 29.68 | 55216.3 |
| 29.69 | 50535.5 |
| 29.7  | 44797.2 |
| 29.71 | 41451.3 |
| 29.72 | 38313.4 |
| 29.73 | 34447.4 |
| 29.74 | 30754.7 |
| 29.75 | 28171.6 |
| 29.76 | 26646   |
| 29.77 | 24652.3 |
| 29.78 | 21566.4 |
| 29.79 | 20717   |
| 29.8  | 18931.3 |
| 29.81 | 17735.1 |
| 29.82 | 16920.3 |
| 29.83 | 15464   |
| 29.84 | 15308   |
| 29.85 | 13297   |
| 29.86 | 12915.6 |
| 29.87 | 11806.1 |
| 29.88 | 12378.2 |
| 29.89 | 11580.7 |
| 29.9  | 10176.4 |
| 29.91 | 10107.1 |
| 29.92 | 9725.7  |
| 29.93 | 9361.64 |
| 29.94 | 9274.96 |
| 29.95 | 9136.27 |
| 29.96 | 8876.22 |
| 29.97 | 9153.6  |
| 29.98 | 7333.28 |
| 29.99 | 7992.07 |
| 30    | 7628    |
| 30.01 | 7298.61 |
| 30.02 | 7385.29 |
| 30.03 | 7419.97 |
| 30.04 | 7125.25 |
| 30.05 | 7315.95 |
| 30.06 | 6847.87 |
| 30.07 | 6362.45 |
| 30.08 | 6119.74 |
| 30.09 | 6275.77 |
| 30.1  | 6345.11 |
| 30.11 | 6795.86 |



|       |         |
|-------|---------|
| 30.12 | 6085.07 |
| 30.13 | 5842.36 |
| 30.14 | 5981.05 |
| 30.15 | 5616.98 |
| 30.16 | 5634.32 |
| 30.17 | 5686.33 |
| 30.18 | 5391.61 |
| 30.19 | 4888.86 |
| 30.2  | 5304.93 |
| 30.21 | 5530.3  |
| 30.22 | 5634.32 |
| 30.23 | 5235.58 |
| 30.24 | 5426.28 |
| 30.25 | 5322.27 |
| 30.26 | 4836.85 |
| 30.27 | 4906.19 |
| 30.28 | 5044.88 |
| 30.29 | 4888.86 |
| 30.3  | 5079.56 |
| 30.31 | 4628.81 |
| 30.32 | 4715.49 |
| 30.33 | 4680.82 |
| 30.34 | 4854.18 |
| 30.35 | 4663.48 |
| 30.36 | 4438.11 |
| 30.37 | 4507.46 |
| 30.38 | 4247.41 |
| 30.39 | 4403.44 |
| 30.4  | 4646.15 |
| 30.41 | 4923.53 |
| 30.42 | 4836.85 |
| 30.43 | 4507.46 |
| 30.44 | 4628.81 |
| 30.45 | 4455.45 |
| 30.46 | 4646.15 |
| 30.47 | 4958.2  |
| 30.48 | 4282.08 |
| 30.49 | 4368.77 |
| 30.5  | 4299.42 |
| 30.51 | 4888.86 |
| 30.52 | 4195.4  |
| 30.53 | 4403.44 |
| 30.54 | 4438.11 |
| 30.55 | 5200.91 |

|       |         |
|-------|---------|
| 30.56 | 4611.47 |
| 30.57 | 4888.86 |
| 30.58 | 4698.16 |
| 30.59 | 5062.22 |
| 30.6  | 4663.48 |
| 30.61 | 5079.56 |
| 30.62 | 4923.53 |
| 30.63 | 4871.52 |
| 30.64 | 4975.54 |
| 30.65 | 5408.95 |
| 30.66 | 5374.27 |
| 30.67 | 5010.21 |
| 30.68 | 5651.66 |
| 30.69 | 5703.67 |
| 30.7  | 5703.67 |
| 30.71 | 5721    |
| 30.72 | 5599.65 |
| 30.73 | 5547.64 |
| 30.74 | 5270.26 |
| 30.75 | 5010.21 |
| 30.76 | 5148.9  |
| 30.77 | 4975.54 |
| 30.78 | 5166.24 |
| 30.79 | 4611.47 |
| 30.8  | 4247.41 |
| 30.81 | 4715.49 |
| 30.82 | 4126.06 |
| 30.83 | 4299.42 |
| 30.84 | 4351.43 |
| 30.85 | 4282.08 |
| 30.86 | 4472.78 |
| 30.87 | 3952.69 |
| 30.88 | 4264.75 |
| 30.89 | 3623.3  |
| 30.9  | 3866.01 |
| 30.91 | 4195.4  |
| 30.92 | 4264.75 |
| 30.93 | 3761.99 |
| 30.94 | 3779.33 |
| 30.95 | 3467.27 |
| 30.96 | 3224.56 |
| 30.97 | 3449.94 |
| 30.98 | 3588.63 |
| 30.99 | 3605.97 |

|       |         |
|-------|---------|
| 31    | 3848.67 |
| 31.01 | 3675.31 |
| 31.02 | 3866.01 |
| 31.03 | 4004.7  |
| 31.04 | 3727.32 |
| 31.05 | 3241.9  |
| 31.06 | 3588.63 |
| 31.07 | 3918.02 |
| 31.08 | 4056.71 |
| 31.09 | 3692.65 |
| 31.1  | 4074.05 |
| 31.11 | 3519.28 |
| 31.12 | 3796.67 |
| 31.13 | 4056.71 |
| 31.14 | 3449.94 |
| 31.15 | 3241.9  |
| 31.16 | 3744.66 |
| 31.17 | 3657.97 |
| 31.18 | 3900.68 |
| 31.19 | 3727.32 |
| 31.2  | 3640.64 |
| 31.21 | 3935.36 |
| 31.22 | 3848.67 |
| 31.23 | 3796.67 |
| 31.24 | 3831.34 |
| 31.25 | 3449.94 |
| 31.26 | 3640.64 |
| 31.27 | 3866.01 |
| 31.28 | 4056.71 |
| 31.29 | 3640.64 |
| 31.3  | 3848.67 |
| 31.31 | 4039.37 |
| 31.32 | 3918.02 |
| 31.33 | 3987.37 |
| 31.34 | 3814    |
| 31.35 | 3952.69 |
| 31.36 | 4264.75 |
| 31.37 | 3952.69 |
| 31.38 | 3918.02 |
| 31.39 | 3814    |
| 31.4  | 4004.7  |
| 31.41 | 4022.04 |
| 31.42 | 4091.38 |
| 31.43 | 4472.78 |

|       |         |
|-------|---------|
| 31.44 | 4299.42 |
| 31.45 | 4299.42 |
| 31.46 | 5044.88 |
| 31.47 | 5235.58 |
| 31.48 | 5114.23 |
| 31.49 | 5062.22 |
| 31.5  | 5408.95 |
| 31.51 | 5374.27 |
| 31.52 | 5911.7  |
| 31.53 | 5703.67 |
| 31.54 | 5703.67 |
| 31.55 | 6085.07 |
| 31.56 | 5963.71 |
| 31.57 | 6154.41 |
| 31.58 | 6709.18 |
| 31.59 | 6310.44 |
| 31.6  | 6657.17 |
| 31.61 | 6258.43 |
| 31.62 | 6258.43 |
| 31.63 | 5790.35 |
| 31.64 | 5634.32 |
| 31.65 | 5010.21 |
| 31.66 | 5599.65 |
| 31.67 | 5564.98 |
| 31.68 | 4958.2  |
| 31.69 | 5096.89 |
| 31.7  | 4160.73 |
| 31.71 | 4663.48 |
| 31.72 | 4524.79 |
| 31.73 | 4403.44 |
| 31.74 | 4247.41 |
| 31.75 | 4576.8  |
| 31.76 | 4299.42 |
| 31.77 | 3900.68 |
| 31.78 | 4299.42 |
| 31.79 | 4160.73 |
| 31.8  | 3831.34 |
| 31.81 | 3935.36 |
| 31.82 | 3744.66 |
| 31.83 | 4022.04 |
| 31.84 | 3727.32 |
| 31.85 | 3831.34 |
| 31.86 | 3467.27 |
| 31.87 | 3605.97 |

|       |         |
|-------|---------|
| 31.88 | 3970.03 |
| 31.89 | 3987.37 |
| 31.9  | 3727.32 |
| 31.91 | 3571.29 |
| 31.92 | 3640.64 |
| 31.93 | 3952.69 |
| 31.94 | 3380.59 |
| 31.95 | 3623.3  |
| 31.96 | 3779.33 |
| 31.97 | 3883.35 |
| 31.98 | 3883.35 |
| 31.99 | 3553.96 |
| 32    | 3848.67 |
| 32.01 | 3536.62 |
| 32.02 | 3224.56 |
| 32.03 | 3588.63 |
| 32.04 | 3519.28 |
| 32.05 | 3467.27 |
| 32.06 | 3259.24 |
| 32.07 | 3432.6  |
| 32.08 | 3484.61 |
| 32.09 | 2999.19 |
| 32.1  | 3224.56 |
| 32.11 | 3363.26 |
| 32.12 | 3484.61 |
| 32.13 | 3675.31 |
| 32.14 | 3363.26 |
| 32.15 | 3501.95 |
| 32.16 | 3207.23 |
| 32.17 | 3207.23 |
| 32.18 | 3935.36 |
| 32.19 | 2791.16 |
| 32.2  | 3623.3  |
| 32.21 | 3363.26 |
| 32.22 | 2964.52 |
| 32.23 | 2947.18 |
| 32.24 | 3536.62 |
| 32.25 | 3553.96 |
| 32.26 | 3103.21 |
| 32.27 | 3363.26 |
| 32.28 | 3727.32 |
| 32.29 | 3311.25 |
| 32.3  | 3536.62 |
| 32.31 | 3727.32 |

|       |         |
|-------|---------|
| 32.32 | 3692.65 |
| 32.33 | 3397.93 |
| 32.34 | 3536.62 |
| 32.35 | 3311.25 |
| 32.36 | 3761.99 |
| 32.37 | 3675.31 |
| 32.38 | 3432.6  |
| 32.39 | 3328.58 |
| 32.4  | 3536.62 |
| 32.41 | 3571.29 |
| 32.42 | 3709.98 |
| 32.43 | 4178.07 |
| 32.44 | 3519.28 |
| 32.45 | 3380.59 |
| 32.46 | 3519.28 |
| 32.47 | 3415.26 |
| 32.48 | 3536.62 |
| 32.49 | 3848.67 |
| 32.5  | 3796.67 |
| 32.51 | 3449.94 |
| 32.52 | 3727.32 |
| 32.53 | 3501.95 |
| 32.54 | 3987.37 |
| 32.55 | 3866.01 |
| 32.56 | 3866.01 |
| 32.57 | 3588.63 |
| 32.58 | 3536.62 |
| 32.59 | 3675.31 |
| 32.6  | 3692.65 |
| 32.61 | 3553.96 |
| 32.62 | 3709.98 |
| 32.63 | 3536.62 |
| 32.64 | 3311.25 |
| 32.65 | 3605.97 |
| 32.66 | 3137.88 |
| 32.67 | 3900.68 |
| 32.68 | 3744.66 |
| 32.69 | 3241.9  |
| 32.7  | 3189.89 |
| 32.71 | 3241.9  |
| 32.72 | 3432.6  |
| 32.73 | 3848.67 |
| 32.74 | 3657.97 |
| 32.75 | 3155.22 |

|       |         |
|-------|---------|
| 32.76 | 3571.29 |
| 32.77 | 3172.56 |
| 32.78 | 3415.26 |
| 32.79 | 3311.25 |
| 32.8  | 3103.21 |
| 32.81 | 3172.56 |
| 32.82 | 3605.97 |
| 32.83 | 3467.27 |
| 32.84 | 3311.25 |
| 32.85 | 3328.58 |
| 32.86 | 3189.89 |
| 32.87 | 3207.23 |
| 32.88 | 3276.57 |
| 32.89 | 3293.91 |
| 32.9  | 3085.87 |
| 32.91 | 3363.26 |
| 32.92 | 3172.56 |
| 32.93 | 3692.65 |
| 32.94 | 3657.97 |
| 32.95 | 3553.96 |
| 32.96 | 3415.26 |
| 32.97 | 3519.28 |
| 32.98 | 3605.97 |
| 32.99 | 3172.56 |
| 33    | 3779.33 |
| 33.01 | 3501.95 |
| 33.02 | 3623.3  |
| 33.03 | 3172.56 |
| 33.04 | 3415.26 |
| 33.05 | 3311.25 |
| 33.06 | 3085.87 |
| 33.07 | 3363.26 |
| 33.08 | 3311.25 |
| 33.09 | 3432.6  |
| 33.1  | 3623.3  |
| 33.11 | 3432.6  |
| 33.12 | 3415.26 |
| 33.13 | 3259.24 |
| 33.14 | 3172.56 |
| 33.15 | 2947.18 |
| 33.16 | 3207.23 |
| 33.17 | 3293.91 |
| 33.18 | 3484.61 |
| 33.19 | 3432.6  |

|       |         |
|-------|---------|
| 33.2  | 3415.26 |
| 33.21 | 3311.25 |
| 33.22 | 3120.55 |
| 33.23 | 3207.23 |
| 33.24 | 3276.57 |
| 33.25 | 3588.63 |
| 33.26 | 2739.15 |
| 33.27 | 3380.59 |
| 33.28 | 3137.88 |
| 33.29 | 3744.66 |
| 33.3  | 3224.56 |
| 33.31 | 3189.89 |
| 33.32 | 3051.2  |
| 33.33 | 3241.9  |
| 33.34 | 2999.19 |
| 33.35 | 3432.6  |
| 33.36 | 3397.93 |
| 33.37 | 3328.58 |
| 33.38 | 3189.89 |
| 33.39 | 3432.6  |
| 33.4  | 2981.86 |
| 33.41 | 3241.9  |
| 33.42 | 3207.23 |
| 33.43 | 2895.17 |
| 33.44 | 2895.17 |
| 33.45 | 2964.52 |
| 33.46 | 3536.62 |
| 33.47 | 3241.9  |
| 33.48 | 2947.18 |
| 33.49 | 3068.54 |
| 33.5  | 3103.21 |
| 33.51 | 3536.62 |
| 33.52 | 3484.61 |
| 33.53 | 2843.16 |
| 33.54 | 2652.46 |
| 33.55 | 3068.54 |
| 33.56 | 3033.86 |
| 33.57 | 3051.2  |
| 33.58 | 2773.82 |
| 33.59 | 2825.83 |
| 33.6  | 3345.92 |
| 33.61 | 2964.52 |
| 33.62 | 3259.24 |
| 33.63 | 3328.58 |



|       |         |
|-------|---------|
| 33.64 | 2652.46 |
| 33.65 | 3172.56 |
| 33.66 | 3467.27 |
| 33.67 | 3553.96 |
| 33.68 | 2860.5  |
| 33.69 | 3276.57 |
| 33.7  | 3207.23 |
| 33.71 | 3033.86 |
| 33.72 | 3328.58 |
| 33.73 | 3051.2  |
| 33.74 | 2929.85 |
| 33.75 | 3276.57 |
| 33.76 | 3068.54 |
| 33.77 | 3605.97 |
| 33.78 | 3085.87 |
| 33.79 | 2999.19 |
| 33.8  | 3276.57 |
| 33.81 | 3120.55 |
| 33.82 | 2513.77 |
| 33.83 | 2877.84 |
| 33.84 | 2652.46 |
| 33.85 | 3432.6  |
| 33.86 | 3016.53 |
| 33.87 | 2999.19 |
| 33.88 | 2877.84 |
| 33.89 | 3259.24 |
| 33.9  | 2843.16 |
| 33.91 | 3103.21 |
| 33.92 | 2964.52 |
| 33.93 | 2947.18 |
| 33.94 | 2669.8  |
| 33.95 | 3814    |
| 33.96 | 3155.22 |
| 33.97 | 3155.22 |
| 33.98 | 3068.54 |
| 33.99 | 3051.2  |
| 34    | 2791.16 |
| 34.01 | 3207.23 |
| 34.02 | 3345.92 |
| 34.03 | 2791.16 |
| 34.04 | 3328.58 |
| 34.05 | 3207.23 |
| 34.06 | 3033.86 |
| 34.07 | 2860.5  |

|       |         |
|-------|---------|
| 34.08 | 3103.21 |
| 34.09 | 3120.55 |
| 34.1  | 3293.91 |
| 34.11 | 3016.53 |
| 34.12 | 2704.47 |
| 34.13 | 3120.55 |
| 34.14 | 3068.54 |
| 34.15 | 2999.19 |
| 34.16 | 3155.22 |
| 34.17 | 3207.23 |
| 34.18 | 3224.56 |
| 34.19 | 3345.92 |
| 34.2  | 2739.15 |
| 34.21 | 2981.86 |
| 34.22 | 3311.25 |
| 34.23 | 3137.88 |
| 34.24 | 2756.48 |
| 34.25 | 2999.19 |
| 34.26 | 2947.18 |
| 34.27 | 2981.86 |
| 34.28 | 3051.2  |
| 34.29 | 3155.22 |
| 34.3  | 2617.79 |
| 34.31 | 2860.5  |
| 34.32 | 3571.29 |
| 34.33 | 2843.16 |
| 34.34 | 3033.86 |
| 34.35 | 2513.77 |
| 34.36 | 3137.88 |
| 34.37 | 2756.48 |
| 34.38 | 3189.89 |
| 34.39 | 3172.56 |
| 34.4  | 2825.83 |
| 34.41 | 3103.21 |
| 34.42 | 3397.93 |
| 34.43 | 3415.26 |
| 34.44 | 3016.53 |
| 34.45 | 3363.26 |
| 34.46 | 3432.6  |
| 34.47 | 2895.17 |
| 34.48 | 3155.22 |
| 34.49 | 2981.86 |
| 34.5  | 2912.51 |
| 34.51 | 3155.22 |

|       |         |
|-------|---------|
| 34.52 | 3120.55 |
| 34.53 | 3241.9  |
| 34.54 | 3051.2  |
| 34.55 | 3189.89 |
| 34.56 | 3363.26 |
| 34.57 | 2929.85 |
| 34.58 | 2860.5  |
| 34.59 | 3311.25 |
| 34.6  | 3345.92 |
| 34.61 | 2825.83 |
| 34.62 | 2704.47 |
| 34.63 | 3553.96 |
| 34.64 | 2895.17 |
| 34.65 | 2860.5  |
| 34.66 | 3051.2  |
| 34.67 | 3241.9  |
| 34.68 | 3484.61 |
| 34.69 | 3328.58 |
| 34.7  | 3311.25 |
| 34.71 | 3241.9  |
| 34.72 | 3345.92 |
| 34.73 | 3640.64 |
| 34.74 | 3120.55 |
| 34.75 | 3519.28 |
| 34.76 | 3449.94 |
| 34.77 | 3328.58 |
| 34.78 | 3172.56 |
| 34.79 | 3207.23 |
| 34.8  | 3536.62 |
| 34.81 | 3449.94 |
| 34.82 | 3051.2  |
| 34.83 | 3155.22 |
| 34.84 | 3172.56 |
| 34.85 | 3051.2  |
| 34.86 | 2981.86 |
| 34.87 | 2825.83 |
| 34.88 | 3519.28 |
| 34.89 | 2808.49 |
| 34.9  | 2756.48 |
| 34.91 | 2721.81 |
| 34.92 | 3103.21 |
| 34.93 | 3276.57 |
| 34.94 | 2947.18 |
| 34.95 | 3120.55 |

|       |         |
|-------|---------|
| 34.96 | 2548.45 |
| 34.97 | 2773.82 |
| 34.98 | 2704.47 |
| 34.99 | 2756.48 |
| 35    | 2704.47 |
| 35.01 | 2617.79 |
| 35.02 | 2843.16 |
| 35.03 | 2912.51 |
| 35.04 | 2999.19 |
| 35.05 | 2773.82 |
| 35.06 | 2583.12 |
| 35.07 | 2548.45 |
| 35.08 | 2808.49 |
| 35.09 | 2791.16 |
| 35.1  | 2964.52 |
| 35.11 | 3189.89 |
| 35.12 | 3033.86 |
| 35.13 | 2860.5  |
| 35.14 | 2791.16 |
| 35.15 | 2999.19 |
| 35.16 | 2860.5  |
| 35.17 | 2687.14 |
| 35.18 | 2773.82 |
| 35.19 | 2877.84 |
| 35.2  | 2929.85 |
| 35.21 | 3051.2  |
| 35.22 | 2860.5  |
| 35.23 | 3293.91 |
| 35.24 | 2739.15 |
| 35.25 | 2773.82 |
| 35.26 | 2617.79 |
| 35.27 | 2687.14 |
| 35.28 | 3293.91 |
| 35.29 | 3345.92 |
| 35.3  | 2791.16 |
| 35.31 | 2791.16 |
| 35.32 | 2791.16 |
| 35.33 | 2947.18 |
| 35.34 | 2964.52 |
| 35.35 | 2825.83 |
| 35.36 | 2999.19 |
| 35.37 | 2669.8  |
| 35.38 | 2427.09 |
| 35.39 | 2808.49 |

|       |         |
|-------|---------|
| 35.4  | 2496.44 |
| 35.41 | 2687.14 |
| 35.42 | 2756.48 |
| 35.43 | 2964.52 |
| 35.44 | 2739.15 |
| 35.45 | 2687.14 |
| 35.46 | 2964.52 |
| 35.47 | 2825.83 |
| 35.48 | 2947.18 |
| 35.49 | 2721.81 |
| 35.5  | 2687.14 |
| 35.51 | 2721.81 |
| 35.52 | 2739.15 |
| 35.53 | 2895.17 |
| 35.54 | 2999.19 |
| 35.55 | 2825.83 |
| 35.56 | 2877.84 |
| 35.57 | 2791.16 |
| 35.58 | 2860.5  |
| 35.59 | 2617.79 |
| 35.6  | 2929.85 |
| 35.61 | 2947.18 |
| 35.62 | 2999.19 |
| 35.63 | 2877.84 |
| 35.64 | 3016.53 |
| 35.65 | 2860.5  |
| 35.66 | 2739.15 |
| 35.67 | 2929.85 |
| 35.68 | 2739.15 |
| 35.69 | 2964.52 |
| 35.7  | 3068.54 |
| 35.71 | 2912.51 |
| 35.72 | 3553.96 |
| 35.73 | 3484.61 |
| 35.74 | 3311.25 |
| 35.75 | 3588.63 |
| 35.76 | 3449.94 |
| 35.77 | 3155.22 |
| 35.78 | 2860.5  |
| 35.79 | 3553.96 |
| 35.8  | 3276.57 |
| 35.81 | 3536.62 |
| 35.82 | 3241.9  |
| 35.83 | 3900.68 |

|       |         |
|-------|---------|
| 35.84 | 3918.02 |
| 35.85 | 3727.32 |
| 35.86 | 4195.4  |
| 35.87 | 4074.05 |
| 35.88 | 3623.3  |
| 35.89 | 3883.35 |
| 35.9  | 4299.42 |
| 35.91 | 5096.89 |
| 35.92 | 5235.58 |
| 35.93 | 4871.52 |
| 35.94 | 5183.57 |
| 35.95 | 5807.68 |
| 35.96 | 5981.05 |
| 35.97 | 5911.7  |
| 35.98 | 6223.76 |
| 35.99 | 5963.71 |
| 36    | 7385.29 |
| 36.01 | 7419.97 |
| 36.02 | 8321.46 |
| 36.03 | 8789.54 |
| 36.04 | 9743.04 |
| 36.05 | 10089.8 |
| 36.06 | 10783.2 |
| 36.07 | 11996.8 |
| 36.08 | 12690.2 |
| 36.09 | 13175.6 |
| 36.1  | 13574.4 |
| 36.11 | 14389.2 |
| 36.12 | 15308   |
| 36.13 | 15620.1 |
| 36.14 | 16157.5 |
| 36.15 | 16053.5 |
| 36.16 | 15082.6 |
| 36.17 | 14770.6 |
| 36.18 | 14007.8 |
| 36.19 | 14319.8 |
| 36.2  | 13609.1 |
| 36.21 | 13037   |
| 36.22 | 12776.9 |
| 36.23 | 11858.1 |
| 36.24 | 11060.6 |
| 36.25 | 10592.5 |
| 36.26 | 10297.8 |
| 36.27 | 9569.68 |

|       |         |
|-------|---------|
| 36.28 | 9222.95 |
| 36.29 | 7905.38 |
| 36.3  | 7732.02 |
| 36.31 | 6969.22 |
| 36.32 | 6743.85 |
| 36.33 | 6795.86 |
| 36.34 | 5894.37 |
| 36.35 | 5582.31 |
| 36.36 | 5478.29 |
| 36.37 | 5235.58 |
| 36.38 | 4559.47 |
| 36.39 | 4143.39 |
| 36.4  | 3952.69 |
| 36.41 | 4420.77 |
| 36.42 | 4351.43 |
| 36.43 | 3900.68 |
| 36.44 | 3831.34 |
| 36.45 | 3952.69 |
| 36.46 | 3328.58 |
| 36.47 | 3605.97 |
| 36.48 | 3137.88 |
| 36.49 | 3657.97 |
| 36.5  | 3051.2  |
| 36.51 | 3380.59 |
| 36.52 | 2964.52 |
| 36.53 | 3155.22 |
| 36.54 | 3571.29 |
| 36.55 | 3501.95 |
| 36.56 | 3051.2  |
| 36.57 | 2999.19 |
| 36.58 | 2756.48 |
| 36.59 | 3172.56 |
| 36.6  | 2739.15 |
| 36.61 | 2791.16 |
| 36.62 | 2999.19 |
| 36.63 | 2981.86 |
| 36.64 | 3068.54 |
| 36.65 | 2479.1  |
| 36.66 | 2669.8  |
| 36.67 | 2947.18 |
| 36.68 | 2600.46 |
| 36.69 | 2669.8  |
| 36.7  | 2617.79 |
| 36.71 | 2600.46 |

|       |         |
|-------|---------|
| 36.72 | 2791.16 |
| 36.73 | 2808.49 |
| 36.74 | 2652.46 |
| 36.75 | 2600.46 |
| 36.76 | 2687.14 |
| 36.77 | 2461.76 |
| 36.78 | 2444.43 |
| 36.79 | 2617.79 |
| 36.8  | 2548.45 |
| 36.81 | 2340.41 |
| 36.82 | 2808.49 |
| 36.83 | 2444.43 |
| 36.84 | 2877.84 |
| 36.85 | 2184.38 |
| 36.86 | 2687.14 |
| 36.87 | 2201.72 |
| 36.88 | 2687.14 |
| 36.89 | 2305.74 |
| 36.9  | 2531.11 |
| 36.91 | 2392.42 |
| 36.92 | 2305.74 |
| 36.93 | 2357.75 |
| 36.94 | 2773.82 |
| 36.95 | 2340.41 |
| 36.96 | 2115.04 |
| 36.97 | 2132.37 |
| 36.98 | 2236.39 |
| 36.99 | 2583.12 |
| 37    | 2600.46 |
| 37.01 | 2271.06 |
| 37.02 | 2323.07 |
| 37.03 | 2739.15 |
| 37.04 | 2773.82 |
| 37.05 | 2167.05 |
| 37.06 | 2496.44 |
| 37.07 | 2427.09 |
| 37.08 | 2288.4  |
| 37.09 | 2340.41 |
| 37.1  | 2600.46 |
| 37.11 | 2531.11 |
| 37.12 | 2011.02 |
| 37.13 | 2444.43 |
| 37.14 | 2704.47 |
| 37.15 | 2427.09 |



|       |         |
|-------|---------|
| 37.16 | 2461.76 |
| 37.17 | 2253.73 |
| 37.18 | 2201.72 |
| 37.19 | 2427.09 |
| 37.2  | 2791.16 |
| 37.21 | 2687.14 |
| 37.22 | 2531.11 |
| 37.23 | 2323.07 |
| 37.24 | 2219.06 |
| 37.25 | 2392.42 |
| 37.26 | 2548.45 |
| 37.27 | 2461.76 |
| 37.28 | 2548.45 |
| 37.29 | 2288.4  |
| 37.3  | 2236.39 |
| 37.31 | 2392.42 |
| 37.32 | 2444.43 |
| 37.33 | 2704.47 |
| 37.34 | 2375.08 |
| 37.35 | 2583.12 |
| 37.36 | 2548.45 |
| 37.37 | 2773.82 |
| 37.38 | 2340.41 |
| 37.39 | 3016.53 |
| 37.4  | 2375.08 |
| 37.41 | 2583.12 |
| 37.42 | 2444.43 |
| 37.43 | 2756.48 |
| 37.44 | 2392.42 |
| 37.45 | 2531.11 |
| 37.46 | 2444.43 |
| 37.47 | 2357.75 |
| 37.48 | 2271.06 |
| 37.49 | 2548.45 |
| 37.5  | 2201.72 |
| 37.51 | 2513.77 |
| 37.52 | 2115.04 |
| 37.53 | 2427.09 |
| 37.54 | 2548.45 |
| 37.55 | 2513.77 |
| 37.56 | 2097.7  |
| 37.57 | 2323.07 |
| 37.58 | 2791.16 |
| 37.59 | 2531.11 |

|       |         |
|-------|---------|
| 37.6  | 2201.72 |
| 37.61 | 2375.08 |
| 37.62 | 2201.72 |
| 37.63 | 2617.79 |
| 37.64 | 2357.75 |
| 37.65 | 2340.41 |
| 37.66 | 2253.73 |
| 37.67 | 2652.46 |
| 37.68 | 2652.46 |
| 37.69 | 2617.79 |
| 37.7  | 2409.76 |
| 37.71 | 2305.74 |
| 37.72 | 2687.14 |
| 37.73 | 2271.06 |
| 37.74 | 2548.45 |
| 37.75 | 2739.15 |
| 37.76 | 2600.46 |
| 37.77 | 2219.06 |
| 37.78 | 2392.42 |
| 37.79 | 2791.16 |
| 37.8  | 2912.51 |
| 37.81 | 2392.42 |
| 37.82 | 2617.79 |
| 37.83 | 2531.11 |
| 37.84 | 2721.81 |
| 37.85 | 2617.79 |
| 37.86 | 2687.14 |
| 37.87 | 2236.39 |
| 37.88 | 2600.46 |
| 37.89 | 2860.5  |
| 37.9  | 2825.83 |
| 37.91 | 2981.86 |
| 37.92 | 2808.49 |
| 37.93 | 2513.77 |
| 37.94 | 2791.16 |
| 37.95 | 2721.81 |
| 37.96 | 2444.43 |
| 37.97 | 2427.09 |
| 37.98 | 2548.45 |
| 37.99 | 2791.16 |
| 38    | 2253.73 |
| 38.01 | 2565.78 |
| 38.02 | 2531.11 |
| 38.03 | 2565.78 |

|       |         |
|-------|---------|
| 38.04 | 2236.39 |
| 38.05 | 2600.46 |
| 38.06 | 2236.39 |
| 38.07 | 2929.85 |
| 38.08 | 2409.76 |
| 38.09 | 2444.43 |
| 38.1  | 2669.8  |
| 38.11 | 2687.14 |
| 38.12 | 2756.48 |
| 38.13 | 2583.12 |
| 38.14 | 2392.42 |
| 38.15 | 2756.48 |
| 38.16 | 2583.12 |
| 38.17 | 2167.05 |
| 38.18 | 2149.71 |
| 38.19 | 2704.47 |
| 38.2  | 2791.16 |
| 38.21 | 2409.76 |
| 38.22 | 2548.45 |
| 38.23 | 2635.13 |
| 38.24 | 2496.44 |
| 38.25 | 2565.78 |
| 38.26 | 2513.77 |
| 38.27 | 2825.83 |
| 38.28 | 2565.78 |
| 38.29 | 2531.11 |
| 38.3  | 2409.76 |
| 38.31 | 2375.08 |
| 38.32 | 2652.46 |
| 38.33 | 2583.12 |
| 38.34 | 2704.47 |
| 38.35 | 2340.41 |
| 38.36 | 2756.48 |
| 38.37 | 2843.16 |
| 38.38 | 2756.48 |
| 38.39 | 2461.76 |
| 38.4  | 2392.42 |
| 38.41 | 2600.46 |
| 38.42 | 2617.79 |
| 38.43 | 2271.06 |
| 38.44 | 2513.77 |
| 38.45 | 2704.47 |
| 38.46 | 2565.78 |
| 38.47 | 2981.86 |

|       |         |
|-------|---------|
| 38.48 | 2652.46 |
| 38.49 | 2617.79 |
| 38.5  | 2479.1  |
| 38.51 | 2531.11 |
| 38.52 | 2461.76 |
| 38.53 | 2687.14 |
| 38.54 | 2652.46 |
| 38.55 | 2236.39 |
| 38.56 | 2617.79 |
| 38.57 | 2825.83 |
| 38.58 | 2011.02 |
| 38.59 | 2357.75 |
| 38.6  | 2652.46 |
| 38.61 | 2444.43 |
| 38.62 | 2635.13 |
| 38.63 | 2843.16 |
| 38.64 | 2912.51 |
| 38.65 | 2375.08 |
| 38.66 | 2479.1  |
| 38.67 | 2600.46 |
| 38.68 | 2825.83 |
| 38.69 | 2652.46 |
| 38.7  | 2531.11 |
| 38.71 | 2444.43 |
| 38.72 | 2843.16 |
| 38.73 | 2375.08 |
| 38.74 | 2635.13 |
| 38.75 | 2825.83 |
| 38.76 | 2600.46 |
| 38.77 | 2756.48 |
| 38.78 | 2583.12 |
| 38.79 | 2461.76 |
| 38.8  | 2479.1  |
| 38.81 | 2877.84 |
| 38.82 | 2791.16 |
| 38.83 | 2808.49 |
| 38.84 | 2912.51 |
| 38.85 | 2548.45 |
| 38.86 | 2687.14 |
| 38.87 | 2739.15 |
| 38.88 | 2548.45 |
| 38.89 | 3033.86 |
| 38.9  | 2773.82 |
| 38.91 | 2583.12 |

|       |         |
|-------|---------|
| 38.92 | 2531.11 |
| 38.93 | 3241.9  |
| 38.94 | 2877.84 |
| 38.95 | 2548.45 |
| 38.96 | 3311.25 |
| 38.97 | 2721.81 |
| 38.98 | 3120.55 |
| 38.99 | 3051.2  |
| 39    | 2808.49 |
| 39.01 | 3103.21 |
| 39.02 | 2825.83 |
| 39.03 | 2756.48 |
| 39.04 | 2808.49 |
| 39.05 | 2999.19 |
| 39.06 | 2929.85 |
| 39.07 | 2895.17 |
| 39.08 | 2860.5  |
| 39.09 | 3172.56 |
| 39.1  | 2704.47 |
| 39.11 | 3415.26 |
| 39.12 | 3016.53 |
| 39.13 | 2773.82 |
| 39.14 | 2999.19 |
| 39.15 | 3172.56 |
| 39.16 | 2427.09 |
| 39.17 | 3432.6  |
| 39.18 | 3120.55 |
| 39.19 | 3380.59 |
| 39.2  | 3363.26 |
| 39.21 | 3449.94 |
| 39.22 | 3415.26 |
| 39.23 | 3623.3  |
| 39.24 | 3814    |
| 39.25 | 4074.05 |
| 39.26 | 3761.99 |
| 39.27 | 4368.77 |
| 39.28 | 4576.8  |
| 39.29 | 4455.45 |
| 39.3  | 4368.77 |
| 39.31 | 5148.9  |
| 39.32 | 5096.89 |
| 39.33 | 5408.95 |
| 39.34 | 5877.03 |
| 39.35 | 6483.8  |

|       |         |
|-------|---------|
| 39.36 | 6327.78 |
| 39.37 | 6622.49 |
| 39.38 | 6986.56 |
| 39.39 | 6830.53 |
| 39.4  | 7419.97 |
| 39.41 | 7888.05 |
| 39.42 | 8061.41 |
| 39.43 | 9569.68 |
| 39.44 | 9465.66 |
| 39.45 | 10679.2 |
| 39.46 | 11788.7 |
| 39.47 | 12412.8 |
| 39.48 | 13349   |
| 39.49 | 14059.8 |
| 39.5  | 15724.1 |
| 39.51 | 17059   |
| 39.52 | 17891.1 |
| 39.53 | 19676.8 |
| 39.54 | 19798.1 |
| 39.55 | 20075.5 |
| 39.56 | 21150.4 |
| 39.57 | 21947.8 |
| 39.58 | 20838.3 |
| 39.59 | 20266.2 |
| 39.6  | 21133   |
| 39.61 | 19659.4 |
| 39.62 | 18359.2 |
| 39.63 | 19000.7 |
| 39.64 | 19711.5 |
| 39.65 | 18549.9 |
| 39.66 | 18272.5 |
| 39.67 | 16833.6 |
| 39.68 | 15204   |
| 39.69 | 14805.3 |
| 39.7  | 13418.4 |
| 39.71 | 12239.5 |
| 39.72 | 11632.7 |
| 39.73 | 10367.1 |
| 39.74 | 9899.07 |
| 39.75 | 9968.41 |
| 39.76 | 9118.93 |
| 39.77 | 8113.42 |
| 39.78 | 7922.72 |
| 39.79 | 7471.98 |

|       |         |
|-------|---------|
| 39.8  | 7107.91 |
| 39.81 | 6761.18 |
| 39.82 | 6431.79 |
| 39.83 | 5755.67 |
| 39.84 | 5460.96 |
| 39.85 | 4888.86 |
| 39.86 | 5079.56 |
| 39.87 | 4472.78 |
| 39.88 | 5096.89 |
| 39.89 | 4091.38 |
| 39.9  | 4039.37 |
| 39.91 | 4576.8  |
| 39.92 | 4732.83 |
| 39.93 | 3900.68 |
| 39.94 | 4178.07 |
| 39.95 | 4091.38 |
| 39.96 | 3900.68 |
| 39.97 | 3207.23 |
| 39.98 | 3848.67 |
| 39.99 | 4282.08 |
| 40    | 3241.9  |
| 40.01 | 3900.68 |
| 40.02 | 3605.97 |
| 40.03 | 3189.89 |
| 40.04 | 3519.28 |
| 40.05 | 3241.9  |
| 40.06 | 3397.93 |
| 40.07 | 3207.23 |
| 40.08 | 3224.56 |
| 40.09 | 3449.94 |
| 40.1  | 3692.65 |
| 40.11 | 3276.57 |
| 40.12 | 2808.49 |
| 40.13 | 2912.51 |
| 40.14 | 2964.52 |
| 40.15 | 2929.85 |
| 40.16 | 2669.8  |
| 40.17 | 3085.87 |
| 40.18 | 2704.47 |
| 40.19 | 2617.79 |
| 40.2  | 2721.81 |
| 40.21 | 2756.48 |
| 40.22 | 3085.87 |
| 40.23 | 2721.81 |

|       |         |
|-------|---------|
| 40.24 | 2531.11 |
| 40.25 | 2687.14 |
| 40.26 | 2583.12 |
| 40.27 | 2531.11 |
| 40.28 | 2565.78 |
| 40.29 | 2548.45 |
| 40.3  | 2565.78 |
| 40.31 | 2548.45 |
| 40.32 | 2565.78 |
| 40.33 | 2773.82 |
| 40.34 | 2652.46 |
| 40.35 | 2513.77 |
| 40.36 | 2409.76 |
| 40.37 | 2548.45 |
| 40.38 | 2461.76 |
| 40.39 | 2461.76 |
| 40.4  | 2323.07 |
| 40.41 | 2669.8  |
| 40.42 | 2045.69 |
| 40.43 | 2288.4  |
| 40.44 | 2427.09 |
| 40.45 | 2444.43 |
| 40.46 | 2427.09 |
| 40.47 | 2600.46 |
| 40.48 | 2513.77 |
| 40.49 | 2617.79 |
| 40.5  | 2288.4  |
| 40.51 | 1993.68 |
| 40.52 | 2669.8  |
| 40.53 | 2461.76 |
| 40.54 | 2219.06 |
| 40.55 | 2531.11 |
| 40.56 | 2461.76 |
| 40.57 | 2531.11 |
| 40.58 | 2461.76 |
| 40.59 | 2184.38 |
| 40.6  | 2600.46 |
| 40.61 | 2375.08 |
| 40.62 | 2305.74 |
| 40.63 | 2271.06 |
| 40.64 | 2253.73 |
| 40.65 | 2375.08 |
| 40.66 | 2756.48 |
| 40.67 | 2513.77 |



|       |         |
|-------|---------|
| 40.68 | 2392.42 |
| 40.69 | 2288.4  |
| 40.7  | 2548.45 |
| 40.71 | 2479.1  |
| 40.72 | 2271.06 |
| 40.73 | 2583.12 |
| 40.74 | 2219.06 |
| 40.75 | 2409.76 |
| 40.76 | 2409.76 |
| 40.77 | 2271.06 |
| 40.78 | 2167.05 |
| 40.79 | 2271.06 |
| 40.8  | 2444.43 |
| 40.81 | 2496.44 |
| 40.82 | 2340.41 |
| 40.83 | 2045.69 |
| 40.84 | 2219.06 |
| 40.85 | 2149.71 |
| 40.86 | 2340.41 |
| 40.87 | 2323.07 |
| 40.88 | 2236.39 |
| 40.89 | 2340.41 |
| 40.9  | 2097.7  |
| 40.91 | 2305.74 |
| 40.92 | 2479.1  |
| 40.93 | 2253.73 |
| 40.94 | 2583.12 |
| 40.95 | 2531.11 |
| 40.96 | 2305.74 |
| 40.97 | 2409.76 |
| 40.98 | 2375.08 |
| 40.99 | 2236.39 |
| 41    | 2687.14 |
| 41.01 | 2444.43 |
| 41.02 | 2392.42 |
| 41.03 | 2409.76 |
| 41.04 | 2340.41 |
| 41.05 | 2253.73 |
| 41.06 | 2167.05 |
| 41.07 | 2357.75 |
| 41.08 | 2132.37 |
| 41.09 | 2219.06 |
| 41.1  | 2201.72 |
| 41.11 | 2271.06 |

|       |         |
|-------|---------|
| 41.12 | 2600.46 |
| 41.13 | 2184.38 |
| 41.14 | 2097.7  |
| 41.15 | 2305.74 |
| 41.16 | 2184.38 |
| 41.17 | 2167.05 |
| 41.18 | 2756.48 |
| 41.19 | 2427.09 |
| 41.2  | 2479.1  |
| 41.21 | 2496.44 |
| 41.22 | 2375.08 |
| 41.23 | 2704.47 |
| 41.24 | 2253.73 |
| 41.25 | 2600.46 |
| 41.26 | 2825.83 |
| 41.27 | 3137.88 |
| 41.28 | 2860.5  |
| 41.29 | 2600.46 |
| 41.3  | 2600.46 |
| 41.31 | 2791.16 |
| 41.32 | 2739.15 |
| 41.33 | 3016.53 |
| 41.34 | 3033.86 |
| 41.35 | 2687.14 |
| 41.36 | 2687.14 |
| 41.37 | 2305.74 |
| 41.38 | 2773.82 |
| 41.39 | 3016.53 |
| 41.4  | 2929.85 |
| 41.41 | 2843.16 |
| 41.42 | 2947.18 |
| 41.43 | 2479.1  |
| 41.44 | 2739.15 |
| 41.45 | 2895.17 |
| 41.46 | 2600.46 |
| 41.47 | 2895.17 |
| 41.48 | 2721.81 |
| 41.49 | 2895.17 |
| 41.5  | 2860.5  |
| 41.51 | 2409.76 |
| 41.52 | 2704.47 |
| 41.53 | 2600.46 |
| 41.54 | 2583.12 |
| 41.55 | 2253.73 |

|       |         |
|-------|---------|
| 41.56 | 2808.49 |
| 41.57 | 2635.13 |
| 41.58 | 2392.42 |
| 41.59 | 2947.18 |
| 41.6  | 2825.83 |
| 41.61 | 2496.44 |
| 41.62 | 2600.46 |
| 41.63 | 2635.13 |
| 41.64 | 2427.09 |
| 41.65 | 2912.51 |
| 41.66 | 2513.77 |
| 41.67 | 2236.39 |
| 41.68 | 2479.1  |
| 41.69 | 2305.74 |
| 41.7  | 2496.44 |
| 41.71 | 2097.7  |
| 41.72 | 2392.42 |
| 41.73 | 2288.4  |
| 41.74 | 2565.78 |
| 41.75 | 2669.8  |
| 41.76 | 2687.14 |
| 41.77 | 2548.45 |
| 41.78 | 2461.76 |
| 41.79 | 2635.13 |
| 41.8  | 2496.44 |
| 41.81 | 2375.08 |
| 41.82 | 2323.07 |
| 41.83 | 2115.04 |
| 41.84 | 2323.07 |
| 41.85 | 2427.09 |
| 41.86 | 2496.44 |
| 41.87 | 2444.43 |
| 41.88 | 2271.06 |
| 41.89 | 2600.46 |
| 41.9  | 2271.06 |
| 41.91 | 2427.09 |
| 41.92 | 2219.06 |
| 41.93 | 2392.42 |
| 41.94 | 2357.75 |
| 41.95 | 2531.11 |
| 41.96 | 2011.02 |
| 41.97 | 2409.76 |
| 41.98 | 2531.11 |
| 41.99 | 2461.76 |

|       |         |
|-------|---------|
| 42    | 2687.14 |
| 42.01 | 2773.82 |
| 42.02 | 2323.07 |
| 42.03 | 2687.14 |
| 42.04 | 2340.41 |
| 42.05 | 2149.71 |
| 42.06 | 2479.1  |
| 42.07 | 2375.08 |
| 42.08 | 2461.76 |
| 42.09 | 2444.43 |
| 42.1  | 2288.4  |
| 42.11 | 2045.69 |
| 42.12 | 2340.41 |
| 42.13 | 2704.47 |
| 42.14 | 2565.78 |
| 42.15 | 2167.05 |
| 42.16 | 2063.03 |
| 42.17 | 2219.06 |
| 42.18 | 2548.45 |
| 42.19 | 2340.41 |
| 42.2  | 2167.05 |
| 42.21 | 2739.15 |
| 42.22 | 2687.14 |
| 42.23 | 2600.46 |
| 42.24 | 2652.46 |
| 42.25 | 2479.1  |
| 42.26 | 2305.74 |
| 42.27 | 2496.44 |
| 42.28 | 2669.8  |
| 42.29 | 2392.42 |
| 42.3  | 2461.76 |
| 42.31 | 2669.8  |
| 42.32 | 2756.48 |
| 42.33 | 2635.13 |
| 42.34 | 2912.51 |
| 42.35 | 2531.11 |
| 42.36 | 2704.47 |
| 42.37 | 2669.8  |
| 42.38 | 2375.08 |
| 42.39 | 2548.45 |
| 42.4  | 2427.09 |
| 42.41 | 2617.79 |
| 42.42 | 2669.8  |
| 42.43 | 2669.8  |

|       |         |
|-------|---------|
| 42.44 | 2479.1  |
| 42.45 | 2496.44 |
| 42.46 | 2721.81 |
| 42.47 | 2687.14 |
| 42.48 | 2669.8  |
| 42.49 | 2375.08 |
| 42.5  | 2669.8  |
| 42.51 | 2773.82 |
| 42.52 | 2565.78 |
| 42.53 | 2513.77 |
| 42.54 | 2756.48 |
| 42.55 | 2479.1  |
| 42.56 | 2843.16 |
| 42.57 | 2860.5  |
| 42.58 | 2236.39 |
| 42.59 | 2843.16 |
| 42.6  | 2739.15 |
| 42.61 | 2843.16 |
| 42.62 | 2739.15 |
| 42.63 | 2461.76 |
| 42.64 | 2669.8  |
| 42.65 | 2669.8  |
| 42.66 | 2617.79 |
| 42.67 | 3016.53 |
| 42.68 | 3051.2  |
| 42.69 | 3051.2  |
| 42.7  | 2912.51 |
| 42.71 | 2531.11 |
| 42.72 | 2548.45 |
| 42.73 | 2843.16 |
| 42.74 | 2877.84 |
| 42.75 | 2912.51 |
| 42.76 | 2981.86 |
| 42.77 | 2999.19 |
| 42.78 | 2791.16 |
| 42.79 | 2964.52 |
| 42.8  | 3189.89 |
| 42.81 | 3137.88 |
| 42.82 | 3016.53 |
| 42.83 | 3293.91 |
| 42.84 | 3137.88 |
| 42.85 | 3051.2  |
| 42.86 | 3103.21 |
| 42.87 | 3259.24 |

|       |         |
|-------|---------|
| 42.88 | 2999.19 |
| 42.89 | 3155.22 |
| 42.9  | 3328.58 |
| 42.91 | 3189.89 |
| 42.92 | 3276.57 |
| 42.93 | 3207.23 |
| 42.94 | 3363.26 |
| 42.95 | 2947.18 |
| 42.96 | 3189.89 |
| 42.97 | 3328.58 |
| 42.98 | 3553.96 |
| 42.99 | 3761.99 |
| 43    | 3623.3  |
| 43.01 | 3883.35 |
| 43.02 | 4403.44 |
| 43.03 | 4438.11 |
| 43.04 | 4524.79 |
| 43.05 | 4680.82 |
| 43.06 | 4472.78 |
| 43.07 | 4732.83 |
| 43.08 | 4975.54 |
| 43.09 | 5200.91 |
| 43.1  | 5790.35 |
| 43.11 | 5512.97 |
| 43.12 | 5547.64 |
| 43.13 | 5582.31 |
| 43.14 | 6154.41 |
| 43.15 | 7211.93 |
| 43.16 | 7142.58 |
| 43.17 | 7090.58 |
| 43.18 | 7367.96 |
| 43.19 | 8148.09 |
| 43.2  | 9309.63 |
| 43.21 | 9587.01 |
| 43.22 | 10765.9 |
| 43.23 | 10800.6 |
| 43.24 | 12308.8 |
| 43.25 | 13331.7 |
| 43.26 | 14025.1 |
| 43.27 | 14770.6 |
| 43.28 | 15724.1 |
| 43.29 | 17215   |
| 43.3  | 18064.5 |
| 43.31 | 17596.4 |

|       |         |
|-------|---------|
| 43.32 | 18601.9 |
| 43.33 | 18081.8 |
| 43.34 | 17232.4 |
| 43.35 | 17960.5 |
| 43.36 | 17943.1 |
| 43.37 | 16400.2 |
| 43.38 | 16400.2 |
| 43.39 | 16521.6 |
| 43.4  | 15550.7 |
| 43.41 | 15325.4 |
| 43.42 | 14597.2 |
| 43.43 | 13851.8 |
| 43.44 | 14389.2 |
| 43.45 | 12516.9 |
| 43.46 | 12759.6 |
| 43.47 | 11130   |
| 43.48 | 9864.39 |
| 43.49 | 9795.05 |
| 43.5  | 9396.31 |
| 43.51 | 8009.4  |
| 43.52 | 7541.32 |
| 43.53 | 7749.36 |
| 43.54 | 6639.83 |
| 43.55 | 6310.44 |
| 43.56 | 6102.4  |
| 43.57 | 5564.98 |
| 43.58 | 5998.38 |
| 43.59 | 5218.25 |
| 43.6  | 4646.15 |
| 43.61 | 4802.17 |
| 43.62 | 4975.54 |
| 43.63 | 5200.91 |
| 43.64 | 4455.45 |
| 43.65 | 4351.43 |
| 43.66 | 4178.07 |
| 43.67 | 4698.16 |
| 43.68 | 4212.74 |
| 43.69 | 3970.03 |
| 43.7  | 4212.74 |
| 43.71 | 3657.97 |
| 43.72 | 3640.64 |
| 43.73 | 3120.55 |
| 43.74 | 3588.63 |
| 43.75 | 3432.6  |

|       |         |
|-------|---------|
| 43.76 | 3536.62 |
| 43.77 | 3397.93 |
| 43.78 | 3588.63 |
| 43.79 | 3501.95 |
| 43.8  | 2999.19 |
| 43.81 | 3224.56 |
| 43.82 | 2929.85 |
| 43.83 | 2791.16 |
| 43.84 | 2947.18 |
| 43.85 | 3276.57 |
| 43.86 | 3293.91 |
| 43.87 | 2808.49 |
| 43.88 | 3016.53 |
| 43.89 | 3051.2  |
| 43.9  | 3155.22 |
| 43.91 | 2652.46 |
| 43.92 | 3207.23 |
| 43.93 | 2687.14 |
| 43.94 | 3155.22 |
| 43.95 | 2877.84 |
| 43.96 | 2635.13 |
| 43.97 | 2825.83 |
| 43.98 | 2895.17 |
| 43.99 | 2721.81 |
| 44    | 2687.14 |
| 44.01 | 2721.81 |
| 44.02 | 2704.47 |
| 44.03 | 2860.5  |
| 44.04 | 2947.18 |
| 44.05 | 2340.41 |
| 44.06 | 2565.78 |
| 44.07 | 2721.81 |
| 44.08 | 2721.81 |
| 44.09 | 2825.83 |
| 44.1  | 2704.47 |
| 44.11 | 2687.14 |
| 44.12 | 2340.41 |
| 44.13 | 2531.11 |
| 44.14 | 2912.51 |
| 44.15 | 2583.12 |
| 44.16 | 2652.46 |
| 44.17 | 2548.45 |
| 44.18 | 2756.48 |
| 44.19 | 2288.4  |



|       |         |
|-------|---------|
| 44.2  | 2583.12 |
| 44.21 | 2773.82 |
| 44.22 | 2409.76 |
| 44.23 | 2496.44 |
| 44.24 | 2479.1  |
| 44.25 | 2531.11 |
| 44.26 | 2652.46 |
| 44.27 | 2513.77 |
| 44.28 | 2531.11 |
| 44.29 | 2236.39 |
| 44.3  | 2756.48 |
| 44.31 | 2513.77 |
| 44.32 | 2409.76 |
| 44.33 | 2531.11 |
| 44.34 | 2583.12 |
| 44.35 | 2149.71 |
| 44.36 | 2739.15 |
| 44.37 | 2288.4  |
| 44.38 | 2843.16 |
| 44.39 | 2479.1  |
| 44.4  | 2600.46 |
| 44.41 | 2219.06 |
| 44.42 | 2583.12 |
| 44.43 | 2444.43 |
| 44.44 | 2583.12 |
| 44.45 | 2392.42 |
| 44.46 | 2045.69 |
| 44.47 | 2583.12 |
| 44.48 | 2617.79 |
| 44.49 | 2548.45 |
| 44.5  | 2704.47 |
| 44.51 | 2600.46 |
| 44.52 | 2375.08 |
| 44.53 | 2444.43 |
| 44.54 | 2253.73 |
| 44.55 | 2409.76 |
| 44.56 | 2305.74 |
| 44.57 | 2583.12 |
| 44.58 | 2912.51 |
| 44.59 | 2635.13 |
| 44.6  | 2409.76 |
| 44.61 | 2375.08 |
| 44.62 | 2288.4  |
| 44.63 | 2427.09 |

|       |         |
|-------|---------|
| 44.64 | 2340.41 |
| 44.65 | 2357.75 |
| 44.66 | 2375.08 |
| 44.67 | 2583.12 |
| 44.68 | 2721.81 |
| 44.69 | 2409.76 |
| 44.7  | 2548.45 |
| 44.71 | 2600.46 |
| 44.72 | 2288.4  |
| 44.73 | 2375.08 |
| 44.74 | 2253.73 |
| 44.75 | 1993.68 |
| 44.76 | 2236.39 |
| 44.77 | 2479.1  |
| 44.78 | 2167.05 |
| 44.79 | 2635.13 |
| 44.8  | 2427.09 |
| 44.81 | 2427.09 |
| 44.82 | 2479.1  |
| 44.83 | 2201.72 |
| 44.84 | 2496.44 |
| 44.85 | 2496.44 |
| 44.86 | 2132.37 |
| 44.87 | 2427.09 |
| 44.88 | 2444.43 |
| 44.89 | 2340.41 |
| 44.9  | 1907    |
| 44.91 | 1941.67 |
| 44.92 | 2184.38 |
| 44.93 | 1993.68 |
| 44.94 | 2045.69 |
| 44.95 | 2357.75 |
| 44.96 | 2687.14 |
| 44.97 | 2305.74 |
| 44.98 | 2097.7  |
| 44.99 | 2236.39 |
| 45    | 2132.37 |
| 45.01 | 2375.08 |
| 45.02 | 2513.77 |
| 45.03 | 2860.5  |
| 45.04 | 2409.76 |
| 45.05 | 2773.82 |
| 45.06 | 2669.8  |
| 45.07 | 2687.14 |

|       |         |
|-------|---------|
| 45.08 | 2323.07 |
| 45.09 | 2271.06 |
| 45.1  | 2340.41 |
| 45.11 | 2496.44 |
| 45.12 | 2392.42 |
| 45.13 | 2461.76 |
| 45.14 | 2479.1  |
| 45.15 | 2288.4  |
| 45.16 | 2652.46 |
| 45.17 | 2617.79 |
| 45.18 | 2409.76 |
| 45.19 | 2392.42 |
| 45.2  | 2340.41 |
| 45.21 | 2531.11 |
| 45.22 | 2669.8  |
| 45.23 | 2513.77 |
| 45.24 | 2271.06 |
| 45.25 | 2583.12 |
| 45.26 | 2236.39 |
| 45.27 | 2184.38 |
| 45.28 | 2461.76 |
| 45.29 | 2565.78 |
| 45.3  | 2687.14 |
| 45.31 | 2548.45 |
| 45.32 | 2600.46 |
| 45.33 | 2531.11 |
| 45.34 | 2947.18 |
| 45.35 | 2652.46 |
| 45.36 | 2773.82 |
| 45.37 | 2877.84 |
| 45.38 | 2652.46 |
| 45.39 | 3085.87 |
| 45.4  | 2981.86 |
| 45.41 | 2513.77 |
| 45.42 | 2652.46 |
| 45.43 | 2565.78 |
| 45.44 | 2461.76 |
| 45.45 | 2669.8  |
| 45.46 | 2479.1  |
| 45.47 | 2617.79 |
| 45.48 | 2600.46 |
| 45.49 | 2895.17 |
| 45.5  | 2565.78 |
| 45.51 | 2669.8  |

|       |         |
|-------|---------|
| 45.52 | 2617.79 |
| 45.53 | 2600.46 |
| 45.54 | 2323.07 |
| 45.55 | 2253.73 |
| 45.56 | 2271.06 |
| 45.57 | 2635.13 |
| 45.58 | 2253.73 |
| 45.59 | 2444.43 |
| 45.6  | 2565.78 |
| 45.61 | 2392.42 |
| 45.62 | 2739.15 |
| 45.63 | 2201.72 |
| 45.64 | 2375.08 |
| 45.65 | 2375.08 |
| 45.66 | 2565.78 |
| 45.67 | 2687.14 |
| 45.68 | 1959.01 |
| 45.69 | 2444.43 |
| 45.7  | 2721.81 |
| 45.71 | 2583.12 |
| 45.72 | 2444.43 |
| 45.73 | 2461.76 |
| 45.74 | 2149.71 |
| 45.75 | 2427.09 |
| 45.76 | 2479.1  |
| 45.77 | 2427.09 |
| 45.78 | 2253.73 |
| 45.79 | 2496.44 |
| 45.8  | 2548.45 |
| 45.81 | 2340.41 |
| 45.82 | 2392.42 |
| 45.83 | 2652.46 |
| 45.84 | 2669.8  |
| 45.85 | 2427.09 |
| 45.86 | 2652.46 |
| 45.87 | 2635.13 |
| 45.88 | 2496.44 |
| 45.89 | 2652.46 |
| 45.9  | 2895.17 |
| 45.91 | 2687.14 |
| 45.92 | 2444.43 |
| 45.93 | 2531.11 |
| 45.94 | 2756.48 |
| 45.95 | 2635.13 |

|       |         |
|-------|---------|
| 45.96 | 2080.36 |
| 45.97 | 2669.8  |
| 45.98 | 2548.45 |
| 45.99 | 2548.45 |
| 46    | 2531.11 |
| 46.01 | 2531.11 |
| 46.02 | 2583.12 |
| 46.03 | 2687.14 |
| 46.04 | 2461.76 |
| 46.05 | 2669.8  |
| 46.06 | 2392.42 |
| 46.07 | 2843.16 |
| 46.08 | 2513.77 |
| 46.09 | 2739.15 |
| 46.1  | 2652.46 |
| 46.11 | 2669.8  |
| 46.12 | 2739.15 |
| 46.13 | 2461.76 |
| 46.14 | 2288.4  |
| 46.15 | 2427.09 |
| 46.16 | 2184.38 |
| 46.17 | 2357.75 |
| 46.18 | 2357.75 |
| 46.19 | 2721.81 |
| 46.2  | 2600.46 |
| 46.21 | 2427.09 |
| 46.22 | 2565.78 |
| 46.23 | 2721.81 |
| 46.24 | 2912.51 |
| 46.25 | 2132.37 |
| 46.26 | 2496.44 |
| 46.27 | 2964.52 |
| 46.28 | 2565.78 |
| 46.29 | 2669.8  |
| 46.3  | 2635.13 |
| 46.31 | 2357.75 |
| 46.32 | 2375.08 |
| 46.33 | 2964.52 |
| 46.34 | 2687.14 |
| 46.35 | 2617.79 |
| 46.36 | 2600.46 |
| 46.37 | 2461.76 |
| 46.38 | 2687.14 |
| 46.39 | 2496.44 |

|       |         |
|-------|---------|
| 46.4  | 2565.78 |
| 46.41 | 2877.84 |
| 46.42 | 2929.85 |
| 46.43 | 2704.47 |
| 46.44 | 2531.11 |
| 46.45 | 2583.12 |
| 46.46 | 2635.13 |
| 46.47 | 2513.77 |
| 46.48 | 2825.83 |
| 46.49 | 2583.12 |
| 46.5  | 2860.5  |
| 46.51 | 2513.77 |
| 46.52 | 2843.16 |
| 46.53 | 2825.83 |
| 46.54 | 2583.12 |
| 46.55 | 2271.06 |
| 46.56 | 2531.11 |
| 46.57 | 2427.09 |
| 46.58 | 2340.41 |
| 46.59 | 2947.18 |
| 46.6  | 2739.15 |
| 46.61 | 2687.14 |
| 46.62 | 2461.76 |
| 46.63 | 2808.49 |
| 46.64 | 2739.15 |
| 46.65 | 2652.46 |
| 46.66 | 2548.45 |
| 46.67 | 3068.54 |
| 46.68 | 3085.87 |
| 46.69 | 2479.1  |
| 46.7  | 2791.16 |
| 46.71 | 2929.85 |
| 46.72 | 2652.46 |
| 46.73 | 2669.8  |
| 46.74 | 2791.16 |
| 46.75 | 2808.49 |
| 46.76 | 3085.87 |
| 46.77 | 2808.49 |
| 46.78 | 2548.45 |
| 46.79 | 2999.19 |
| 46.8  | 2652.46 |
| 46.81 | 2704.47 |
| 46.82 | 2825.83 |
| 46.83 | 3345.92 |

|       |         |
|-------|---------|
| 46.84 | 2843.16 |
| 46.85 | 2964.52 |
| 46.86 | 3016.53 |
| 46.87 | 3155.22 |
| 46.88 | 3085.87 |
| 46.89 | 3120.55 |
| 46.9  | 3103.21 |
| 46.91 | 3432.6  |
| 46.92 | 3449.94 |
| 46.93 | 3432.6  |
| 46.94 | 3692.65 |
| 46.95 | 3259.24 |
| 46.96 | 3675.31 |
| 46.97 | 3883.35 |
| 46.98 | 3779.33 |
| 46.99 | 3449.94 |
| 47    | 3831.34 |
| 47.01 | 4264.75 |
| 47.02 | 4178.07 |
| 47.03 | 4022.04 |
| 47.04 | 3970.03 |
| 47.05 | 4646.15 |
| 47.06 | 4576.8  |
| 47.07 | 4802.17 |
| 47.08 | 4802.17 |
| 47.09 | 4767.5  |
| 47.1  | 4767.5  |
| 47.11 | 5027.55 |
| 47.12 | 4923.53 |
| 47.13 | 5443.62 |
| 47.14 | 5963.71 |
| 47.15 | 6015.72 |
| 47.16 | 6085.07 |
| 47.17 | 6154.41 |
| 47.18 | 6414.46 |
| 47.19 | 7055.9  |
| 47.2  | 7575.99 |
| 47.21 | 7957.39 |
| 47.22 | 8408.14 |
| 47.23 | 8356.13 |
| 47.24 | 8598.84 |
| 47.25 | 9413.65 |
| 47.26 | 8997.58 |
| 47.27 | 8928.23 |

|       |         |
|-------|---------|
| 47.28 | 9240.29 |
| 47.29 | 9257.62 |
| 47.3  | 9205.61 |
| 47.31 | 9448.32 |
| 47.32 | 9725.7  |
| 47.33 | 9465.66 |
| 47.34 | 9552.34 |
| 47.35 | 10124.4 |
| 47.36 | 9136.27 |
| 47.37 | 9795.05 |
| 47.38 | 9673.69 |
| 47.39 | 10869.9 |
| 47.4  | 11234   |
| 47.41 | 11407.3 |
| 47.42 | 11268.6 |
| 47.43 | 10263.1 |
| 47.44 | 10973.9 |
| 47.45 | 10939.3 |
| 47.46 | 10817.9 |
| 47.47 | 12031.4 |
| 47.48 | 12031.4 |
| 47.49 | 12274.2 |
| 47.5  | 12447.5 |
| 47.51 | 13557   |
| 47.52 | 13487.7 |
| 47.53 | 16105.5 |
| 47.54 | 15845.4 |
| 47.55 | 16296.2 |
| 47.56 | 18653.9 |
| 47.57 | 19139.4 |
| 47.58 | 20439.6 |
| 47.59 | 21549.1 |
| 47.6  | 21289.1 |
| 47.61 | 21497.1 |
| 47.62 | 22728   |
| 47.63 | 23976.2 |
| 47.64 | 23716.2 |
| 47.65 | 23924.2 |
| 47.66 | 23265.4 |
| 47.67 | 23092   |
| 47.68 | 22537.3 |
| 47.69 | 22450.6 |
| 47.7  | 20890.3 |
| 47.71 | 20734.3 |



|       |         |
|-------|---------|
| 47.72 | 20058.2 |
| 47.73 | 19867.5 |
| 47.74 | 20612.9 |
| 47.75 | 18307.2 |
| 47.76 | 17336.4 |
| 47.77 | 16625.6 |
| 47.78 | 16642.9 |
| 47.79 | 15533.4 |
| 47.8  | 14302.5 |
| 47.81 | 13955.8 |
| 47.82 | 13123.6 |
| 47.83 | 11771.4 |
| 47.84 | 11806.1 |
| 47.85 | 11112.6 |
| 47.86 | 10159.1 |
| 47.87 | 10245.8 |
| 47.88 | 9604.35 |
| 47.89 | 8581.5  |
| 47.9  | 8754.87 |
| 47.91 | 8217.44 |
| 47.92 | 7419.97 |
| 47.93 | 7489.31 |
| 47.94 | 6206.42 |
| 47.95 | 6535.81 |
| 47.96 | 6466.47 |
| 47.97 | 6067.73 |
| 47.98 | 6050.39 |
| 47.99 | 5825.02 |
| 48    | 6223.76 |
| 48.01 | 6431.79 |
| 48.02 | 5842.36 |
| 48.03 | 5148.9  |
| 48.04 | 5218.25 |
| 48.05 | 5304.93 |
| 48.06 | 5131.57 |
| 48.07 | 5166.24 |
| 48.08 | 4836.85 |
| 48.09 | 4559.47 |
| 48.1  | 4663.48 |
| 48.11 | 4854.18 |
| 48.12 | 4559.47 |
| 48.13 | 4628.81 |
| 48.14 | 4316.76 |
| 48.15 | 4542.13 |

|       |         |
|-------|---------|
| 48.16 | 4472.78 |
| 48.17 | 4698.16 |
| 48.18 | 4524.79 |
| 48.19 | 4108.72 |
| 48.2  | 3970.03 |
| 48.21 | 4524.79 |
| 48.22 | 4455.45 |
| 48.23 | 4247.41 |
| 48.24 | 4160.73 |
| 48.25 | 4299.42 |
| 48.26 | 4039.37 |
| 48.27 | 4091.38 |
| 48.28 | 4420.77 |
| 48.29 | 4264.75 |
| 48.3  | 4611.47 |
| 48.31 | 4871.52 |
| 48.32 | 4871.52 |
| 48.33 | 5044.88 |
| 48.34 | 5027.55 |
| 48.35 | 5322.27 |
| 48.36 | 5495.63 |
| 48.37 | 5391.61 |
| 48.38 | 5842.36 |
| 48.39 | 5738.34 |
| 48.4  | 6171.75 |
| 48.41 | 6206.42 |
| 48.42 | 6535.81 |
| 48.43 | 6570.48 |
| 48.44 | 7645.34 |
| 48.45 | 7732.02 |
| 48.46 | 8373.47 |
| 48.47 | 8442.81 |
| 48.48 | 8390.8  |
| 48.49 | 8841.55 |
| 48.5  | 9725.7  |
| 48.51 | 11372.7 |
| 48.52 | 11077.9 |
| 48.53 | 12707.6 |
| 48.54 | 13349   |
| 48.55 | 14423.9 |
| 48.56 | 15394.7 |
| 48.57 | 15429.4 |
| 48.58 | 17319   |
| 48.59 | 16989.6 |

|       |         |
|-------|---------|
| 48.6  | 18705.9 |
| 48.61 | 19364.7 |
| 48.62 | 21150.4 |
| 48.63 | 22121.2 |
| 48.64 | 22173.2 |
| 48.65 | 22329.2 |
| 48.66 | 22259.9 |
| 48.67 | 21653.1 |
| 48.68 | 20959.7 |
| 48.69 | 21098.4 |
| 48.7  | 21289.1 |
| 48.71 | 20144.9 |
| 48.72 | 19763.5 |
| 48.73 | 19468.7 |
| 48.74 | 18775.3 |
| 48.75 | 18324.5 |
| 48.76 | 16417.5 |
| 48.77 | 17215   |
| 48.78 | 16868.3 |
| 48.79 | 16070.8 |
| 48.8  | 15186.7 |
| 48.81 | 14493.2 |
| 48.82 | 14007.8 |
| 48.83 | 13037   |
| 48.84 | 12811.6 |
| 48.85 | 11147.3 |
| 48.86 | 10661.9 |
| 48.87 | 10089.8 |
| 48.88 | 9361.64 |
| 48.89 | 8494.82 |
| 48.9  | 8338.79 |
| 48.91 | 8044.08 |
| 48.92 | 7385.29 |
| 48.93 | 7350.62 |
| 48.94 | 6483.8  |
| 48.95 | 6223.76 |
| 48.96 | 6258.43 |
| 48.97 | 5894.37 |
| 48.98 | 5495.63 |
| 48.99 | 5287.59 |
| 49    | 5564.98 |
| 49.01 | 4490.12 |
| 49.02 | 4663.48 |
| 49.03 | 4646.15 |

|       |         |
|-------|---------|
| 49.04 | 4212.74 |
| 49.05 | 4438.11 |
| 49.06 | 4282.08 |
| 49.07 | 3848.67 |
| 49.08 | 4056.71 |
| 49.09 | 4160.73 |
| 49.1  | 3935.36 |
| 49.11 | 4004.7  |
| 49.12 | 3415.26 |
| 49.13 | 3571.29 |
| 49.14 | 4108.72 |
| 49.15 | 3866.01 |
| 49.16 | 3519.28 |
| 49.17 | 3657.97 |
| 49.18 | 3761.99 |
| 49.19 | 3328.58 |
| 49.2  | 3120.55 |
| 49.21 | 3363.26 |
| 49.22 | 3103.21 |
| 49.23 | 3051.2  |
| 49.24 | 3120.55 |
| 49.25 | 2843.16 |
| 49.26 | 3085.87 |
| 49.27 | 3467.27 |
| 49.28 | 2877.84 |
| 49.29 | 2981.86 |
| 49.3  | 3328.58 |
| 49.31 | 3103.21 |
| 49.32 | 2808.49 |
| 49.33 | 2929.85 |
| 49.34 | 3016.53 |
| 49.35 | 3276.57 |
| 49.36 | 3016.53 |
| 49.37 | 2548.45 |
| 49.38 | 2583.12 |
| 49.39 | 2704.47 |
| 49.4  | 2565.78 |
| 49.41 | 2877.84 |
| 49.42 | 2461.76 |
| 49.43 | 2669.8  |
| 49.44 | 2808.49 |
| 49.45 | 2756.48 |
| 49.46 | 2548.45 |
| 49.47 | 2635.13 |

|       |         |
|-------|---------|
| 49.48 | 2583.12 |
| 49.49 | 2756.48 |
| 49.5  | 2479.1  |
| 49.51 | 2981.86 |
| 49.52 | 2531.11 |
| 49.53 | 2565.78 |
| 49.54 | 2548.45 |
| 49.55 | 2669.8  |
| 49.56 | 2219.06 |
| 49.57 | 2635.13 |
| 49.58 | 2513.77 |
| 49.59 | 2721.81 |
| 49.6  | 2496.44 |
| 49.61 | 2548.45 |
| 49.62 | 2392.42 |
| 49.63 | 2375.08 |
| 49.64 | 2600.46 |
| 49.65 | 2583.12 |
| 49.66 | 2357.75 |
| 49.67 | 2531.11 |
| 49.68 | 2219.06 |
| 49.69 | 2271.06 |
| 49.7  | 2600.46 |
| 49.71 | 2565.78 |
| 49.72 | 2461.76 |
| 49.73 | 2288.4  |
| 49.74 | 2305.74 |
| 49.75 | 2479.1  |
| 49.76 | 2444.43 |
| 49.77 | 2496.44 |
| 49.78 | 2097.7  |
| 49.79 | 2340.41 |
| 49.8  | 2201.72 |
| 49.81 | 2357.75 |
| 49.82 | 2496.44 |
| 49.83 | 2271.06 |
| 49.84 | 2097.7  |
| 49.85 | 2635.13 |
| 49.86 | 2565.78 |
| 49.87 | 2149.71 |
| 49.88 | 2184.38 |
| 49.89 | 2063.03 |
| 49.9  | 2565.78 |
| 49.91 | 2063.03 |

|       |         |
|-------|---------|
| 49.92 | 2201.72 |
| 49.93 | 2323.07 |
| 49.94 | 2669.8  |
| 49.95 | 1976.35 |
| 49.96 | 2167.05 |
| 49.97 | 2011.02 |
| 49.98 | 2565.78 |
| 49.99 | 2184.38 |
| 50    | 2288.4  |
| 50.01 | 2167.05 |
| 50.02 | 1993.68 |
| 50.03 | 2479.1  |
| 50.04 | 2340.41 |
| 50.05 | 2513.77 |
| 50.06 | 2669.8  |
| 50.07 | 2461.76 |
| 50.08 | 2115.04 |
| 50.09 | 2236.39 |
| 50.1  | 2149.71 |
| 50.11 | 1854.99 |
| 50.12 | 2288.4  |
| 50.13 | 2461.76 |
| 50.14 | 2427.09 |
| 50.15 | 2028.36 |
| 50.16 | 2340.41 |
| 50.17 | 2149.71 |
| 50.18 | 2253.73 |
| 50.19 | 2375.08 |
| 50.2  | 2149.71 |
| 50.21 | 2323.07 |
| 50.22 | 2149.71 |
| 50.23 | 2184.38 |
| 50.24 | 1993.68 |
| 50.25 | 2167.05 |
| 50.26 | 1959.01 |
| 50.27 | 2063.03 |
| 50.28 | 2271.06 |
| 50.29 | 1889.66 |
| 50.3  | 2635.13 |
| 50.31 | 2409.76 |
| 50.32 | 2011.02 |
| 50.33 | 2184.38 |
| 50.34 | 2236.39 |
| 50.35 | 2149.71 |

|       |         |
|-------|---------|
| 50.36 | 2115.04 |
| 50.37 | 2167.05 |
| 50.38 | 2011.02 |
| 50.39 | 2028.36 |
| 50.4  | 2253.73 |
| 50.41 | 2531.11 |
| 50.42 | 2479.1  |
| 50.43 | 2305.74 |
| 50.44 | 2184.38 |
| 50.45 | 2288.4  |
| 50.46 | 2271.06 |
| 50.47 | 2271.06 |
| 50.48 | 2184.38 |
| 50.49 | 2357.75 |
| 50.5  | 2115.04 |
| 50.51 | 2184.38 |
| 50.52 | 2409.76 |
| 50.53 | 2184.38 |
| 50.54 | 2375.08 |
| 50.55 | 1924.34 |
| 50.56 | 2097.7  |
| 50.57 | 2028.36 |
| 50.58 | 2028.36 |
| 50.59 | 2132.37 |
| 50.6  | 2236.39 |
| 50.61 | 2167.05 |
| 50.62 | 2201.72 |
| 50.63 | 2236.39 |
| 50.64 | 2149.71 |
| 50.65 | 1993.68 |
| 50.66 | 2340.41 |
| 50.67 | 2236.39 |
| 50.68 | 2201.72 |
| 50.69 | 2132.37 |
| 50.7  | 2028.36 |
| 50.71 | 2427.09 |
| 50.72 | 2167.05 |
| 50.73 | 2271.06 |
| 50.74 | 2236.39 |
| 50.75 | 2409.76 |
| 50.76 | 2409.76 |
| 50.77 | 2132.37 |
| 50.78 | 2357.75 |
| 50.79 | 2045.69 |

|       |         |
|-------|---------|
| 50.8  | 1872.33 |
| 50.81 | 2444.43 |
| 50.82 | 1976.35 |
| 50.83 | 1716.3  |
| 50.84 | 1698.96 |
| 50.85 | 1889.66 |
| 50.86 | 2288.4  |
| 50.87 | 1993.68 |
| 50.88 | 2149.71 |
| 50.89 | 2271.06 |
| 50.9  | 1837.66 |
| 50.91 | 2409.76 |
| 50.92 | 1768.31 |
| 50.93 | 2271.06 |
| 50.94 | 2513.77 |
| 50.95 | 2461.76 |
| 50.96 | 2635.13 |
| 50.97 | 2375.08 |
| 50.98 | 2201.72 |
| 50.99 | 2184.38 |
| 51    | 2531.11 |
| 51.01 | 2167.05 |
| 51.02 | 2548.45 |
| 51.03 | 2271.06 |
| 51.04 | 2201.72 |
| 51.05 | 2045.69 |
| 51.06 | 2063.03 |
| 51.07 | 1993.68 |
| 51.08 | 2063.03 |
| 51.09 | 1907    |
| 51.1  | 2253.73 |
| 51.11 | 1993.68 |
| 51.12 | 2340.41 |
| 51.13 | 2167.05 |
| 51.14 | 2132.37 |
| 51.15 | 2063.03 |
| 51.16 | 2115.04 |
| 51.17 | 2201.72 |
| 51.18 | 2167.05 |
| 51.19 | 2132.37 |
| 51.2  | 1785.65 |
| 51.21 | 1646.96 |
| 51.22 | 2011.02 |
| 51.23 | 2167.05 |



|       |         |
|-------|---------|
| 51.24 | 2184.38 |
| 51.25 | 2115.04 |
| 51.26 | 2011.02 |
| 51.27 | 1854.99 |
| 51.28 | 1907    |
| 51.29 | 2132.37 |
| 51.3  | 1924.34 |
| 51.31 | 2097.7  |
| 51.32 | 2115.04 |
| 51.33 | 1594.95 |
| 51.34 | 1889.66 |
| 51.35 | 2201.72 |
| 51.36 | 1976.35 |
| 51.37 | 1854.99 |
| 51.38 | 1924.34 |
| 51.39 | 2097.7  |
| 51.4  | 1872.33 |
| 51.41 | 2115.04 |
| 51.42 | 2167.05 |
| 51.43 | 1907    |
| 51.44 | 2201.72 |
| 51.45 | 1907    |
| 51.46 | 1907    |
| 51.47 | 2011.02 |
| 51.48 | 2115.04 |
| 51.49 | 2011.02 |
| 51.5  | 1907    |
| 51.51 | 1820.32 |
| 51.52 | 1941.67 |
| 51.53 | 1924.34 |
| 51.54 | 2201.72 |
| 51.55 | 1837.66 |
| 51.56 | 1993.68 |
| 51.57 | 2132.37 |
| 51.58 | 2149.71 |
| 51.59 | 2184.38 |
| 51.6  | 2323.07 |
| 51.61 | 2080.36 |
| 51.62 | 2080.36 |
| 51.63 | 2149.71 |
| 51.64 | 2219.06 |
| 51.65 | 1768.31 |
| 51.66 | 2028.36 |
| 51.67 | 1768.31 |

|       |         |
|-------|---------|
| 51.68 | 1698.96 |
| 51.69 | 2097.7  |
| 51.7  | 1924.34 |
| 51.71 | 1889.66 |
| 51.72 | 1907    |
| 51.73 | 1768.31 |
| 51.74 | 1490.93 |
| 51.75 | 1993.68 |
| 51.76 | 1612.28 |
| 51.77 | 1924.34 |
| 51.78 | 1907    |
| 51.79 | 1768.31 |
| 51.8  | 2045.69 |
| 51.81 | 1785.65 |
| 51.82 | 2063.03 |
| 51.83 | 1629.62 |
| 51.84 | 1959.01 |
| 51.85 | 1837.66 |
| 51.86 | 1785.65 |
| 51.87 | 1907    |
| 51.88 | 1768.31 |
| 51.89 | 1820.32 |
| 51.9  | 2063.03 |
| 51.91 | 2011.02 |
| 51.92 | 1733.64 |
| 51.93 | 1854.99 |
| 51.94 | 1907    |
| 51.95 | 1802.98 |
| 51.96 | 1872.33 |
| 51.97 | 1941.67 |
| 51.98 | 1959.01 |
| 51.99 | 1681.63 |
| 52    | 1681.63 |
| 52.01 | 1646.96 |
| 52.02 | 2063.03 |
| 52.03 | 1993.68 |
| 52.04 | 1768.31 |
| 52.05 | 1941.67 |
| 52.06 | 2271.06 |
| 52.07 | 2080.36 |
| 52.08 | 1733.64 |
| 52.09 | 1768.31 |
| 52.1  | 1976.35 |
| 52.11 | 1820.32 |

|       |         |
|-------|---------|
| 52.12 | 1993.68 |
| 52.13 | 1907    |
| 52.14 | 1854.99 |
| 52.15 | 1941.67 |
| 52.16 | 1959.01 |
| 52.17 | 2045.69 |
| 52.18 | 2236.39 |
| 52.19 | 2167.05 |
| 52.2  | 1959.01 |
| 52.21 | 1681.63 |
| 52.22 | 2115.04 |
| 52.23 | 2011.02 |
| 52.24 | 1664.29 |
| 52.25 | 1941.67 |
| 52.26 | 1872.33 |
| 52.27 | 1907    |
| 52.28 | 1681.63 |
| 52.29 | 1664.29 |
| 52.3  | 2097.7  |
| 52.31 | 1872.33 |
| 52.32 | 2011.02 |
| 52.33 | 1941.67 |
| 52.34 | 1698.96 |
| 52.35 | 1785.65 |
| 52.36 | 1959.01 |
| 52.37 | 2011.02 |
| 52.38 | 1941.67 |
| 52.39 | 2236.39 |
| 52.4  | 2115.04 |
| 52.41 | 1854.99 |
| 52.42 | 1976.35 |
| 52.43 | 1664.29 |
| 52.44 | 1733.64 |
| 52.45 | 1907    |
| 52.46 | 2080.36 |
| 52.47 | 1716.3  |
| 52.48 | 1750.97 |
| 52.49 | 1924.34 |
| 52.5  | 2045.69 |
| 52.51 | 1750.97 |
| 52.52 | 2097.7  |
| 52.53 | 1785.65 |
| 52.54 | 1924.34 |
| 52.55 | 1525.6  |

|       |         |
|-------|---------|
| 52.56 | 1993.68 |
| 52.57 | 2132.37 |
| 52.58 | 2097.7  |
| 52.59 | 2167.05 |
| 52.6  | 1993.68 |
| 52.61 | 1941.67 |
| 52.62 | 1959.01 |
| 52.63 | 1854.99 |
| 52.64 | 1924.34 |
| 52.65 | 1646.96 |
| 52.66 | 1924.34 |
| 52.67 | 1664.29 |
| 52.68 | 1820.32 |
| 52.69 | 1802.98 |
| 52.7  | 2011.02 |
| 52.71 | 1993.68 |
| 52.72 | 1820.32 |
| 52.73 | 1976.35 |
| 52.74 | 2132.37 |
| 52.75 | 1924.34 |
| 52.76 | 2149.71 |
| 52.77 | 1698.96 |
| 52.78 | 1993.68 |
| 52.79 | 1907    |
| 52.8  | 1750.97 |
| 52.81 | 1959.01 |
| 52.82 | 1907    |
| 52.83 | 2080.36 |
| 52.84 | 2063.03 |
| 52.85 | 1976.35 |
| 52.86 | 2028.36 |
| 52.87 | 2028.36 |
| 52.88 | 1976.35 |
| 52.89 | 1941.67 |
| 52.9  | 1854.99 |
| 52.91 | 2184.38 |
| 52.92 | 2080.36 |
| 52.93 | 1941.67 |
| 52.94 | 1924.34 |
| 52.95 | 1733.64 |
| 52.96 | 1733.64 |
| 52.97 | 2028.36 |
| 52.98 | 2115.04 |
| 52.99 | 2080.36 |

|       |         |
|-------|---------|
| 53    | 1924.34 |
| 53.01 | 1924.34 |
| 53.02 | 2184.38 |
| 53.03 | 1924.34 |
| 53.04 | 2167.05 |
| 53.05 | 2097.7  |
| 53.06 | 1941.67 |
| 53.07 | 1820.32 |
| 53.08 | 1698.96 |
| 53.09 | 1924.34 |
| 53.1  | 2028.36 |
| 53.11 | 1750.97 |
| 53.12 | 1941.67 |
| 53.13 | 1820.32 |
| 53.14 | 1854.99 |
| 53.15 | 2097.7  |
| 53.16 | 2115.04 |
| 53.17 | 2236.39 |
| 53.18 | 2028.36 |
| 53.19 | 1698.96 |
| 53.2  | 1768.31 |
| 53.21 | 1854.99 |
| 53.22 | 2011.02 |
| 53.23 | 2288.4  |
| 53.24 | 2184.38 |
| 53.25 | 2236.39 |
| 53.26 | 1854.99 |
| 53.27 | 1993.68 |
| 53.28 | 1768.31 |
| 53.29 | 2028.36 |
| 53.3  | 2063.03 |
| 53.31 | 2097.7  |
| 53.32 | 1976.35 |
| 53.33 | 2011.02 |
| 53.34 | 2097.7  |
| 53.35 | 2028.36 |
| 53.36 | 1681.63 |
| 53.37 | 2080.36 |
| 53.38 | 1820.32 |
| 53.39 | 1924.34 |
| 53.4  | 1889.66 |
| 53.41 | 2115.04 |
| 53.42 | 1854.99 |
| 53.43 | 1854.99 |

|       |         |
|-------|---------|
| 53.44 | 1872.33 |
| 53.45 | 1907    |
| 53.46 | 2080.36 |
| 53.47 | 1525.6  |
| 53.48 | 1785.65 |
| 53.49 | 1698.96 |
| 53.5  | 1959.01 |
| 53.51 | 1733.64 |
| 53.52 | 1802.98 |
| 53.53 | 1508.26 |
| 53.54 | 1490.93 |
| 53.55 | 1907    |
| 53.56 | 1854.99 |
| 53.57 | 1854.99 |
| 53.58 | 1854.99 |
| 53.59 | 1698.96 |
| 53.6  | 1733.64 |
| 53.61 | 1629.62 |
| 53.62 | 1542.94 |
| 53.63 | 1716.3  |
| 53.64 | 1837.66 |
| 53.65 | 1820.32 |
| 53.66 | 1907    |
| 53.67 | 2219.06 |
| 53.68 | 1802.98 |
| 53.69 | 1560.27 |
| 53.7  | 1959.01 |
| 53.71 | 1733.64 |
| 53.72 | 1681.63 |
| 53.73 | 1941.67 |
| 53.74 | 1594.95 |
| 53.75 | 1733.64 |
| 53.76 | 1733.64 |
| 53.77 | 1802.98 |
| 53.78 | 1941.67 |
| 53.79 | 1681.63 |
| 53.8  | 1785.65 |
| 53.81 | 1594.95 |
| 53.82 | 1941.67 |
| 53.83 | 1924.34 |
| 53.84 | 1750.97 |
| 53.85 | 1785.65 |
| 53.86 | 1369.57 |
| 53.87 | 1438.92 |

|       |         |
|-------|---------|
| 53.88 | 1889.66 |
| 53.89 | 1525.6  |
| 53.9  | 1681.63 |
| 53.91 | 1820.32 |
| 53.92 | 1854.99 |
| 53.93 | 1785.65 |
| 53.94 | 1802.98 |
| 53.95 | 1716.3  |
| 53.96 | 1750.97 |
| 53.97 | 1473.59 |
| 53.98 | 1768.31 |
| 53.99 | 1681.63 |
| 54    | 1733.64 |
| 54.01 | 2028.36 |
| 54.02 | 1681.63 |
| 54.03 | 1594.95 |
| 54.04 | 2045.69 |
| 54.05 | 1629.62 |
| 54.06 | 1785.65 |
| 54.07 | 1993.68 |
| 54.08 | 1716.3  |
| 54.09 | 1300.23 |
| 54.1  | 1646.96 |
| 54.11 | 1785.65 |
| 54.12 | 1664.29 |
| 54.13 | 1594.95 |
| 54.14 | 1716.3  |
| 54.15 | 2184.38 |
| 54.16 | 1872.33 |
| 54.17 | 1854.99 |
| 54.18 | 1646.96 |
| 54.19 | 1837.66 |
| 54.2  | 1560.27 |
| 54.21 | 1525.6  |
| 54.22 | 1386.91 |
| 54.23 | 1612.28 |
| 54.24 | 1629.62 |
| 54.25 | 1664.29 |
| 54.26 | 1664.29 |
| 54.27 | 1802.98 |
| 54.28 | 1698.96 |
| 54.29 | 1612.28 |
| 54.3  | 1594.95 |
| 54.31 | 1872.33 |

|       |         |
|-------|---------|
| 54.32 | 1716.3  |
| 54.33 | 1560.27 |
| 54.34 | 1646.96 |
| 54.35 | 1733.64 |
| 54.36 | 1352.24 |
| 54.37 | 1629.62 |
| 54.38 | 1733.64 |
| 54.39 | 1542.94 |
| 54.4  | 1542.94 |
| 54.41 | 1508.26 |
| 54.42 | 1681.63 |
| 54.43 | 1854.99 |
| 54.44 | 1750.97 |
| 54.45 | 1421.58 |
| 54.46 | 1438.92 |
| 54.47 | 2201.72 |
| 54.48 | 1802.98 |
| 54.49 | 1924.34 |
| 54.5  | 1404.25 |
| 54.51 | 1750.97 |
| 54.52 | 1490.93 |
| 54.53 | 1508.26 |
| 54.54 | 1560.27 |
| 54.55 | 1785.65 |
| 54.56 | 1768.31 |
| 54.57 | 1750.97 |
| 54.58 | 1837.66 |
| 54.59 | 1612.28 |
| 54.6  | 1768.31 |
| 54.61 | 1993.68 |
| 54.62 | 1872.33 |
| 54.63 | 1612.28 |
| 54.64 | 1629.62 |
| 54.65 | 1664.29 |
| 54.66 | 1542.94 |
| 54.67 | 1508.26 |
| 54.68 | 1664.29 |
| 54.69 | 2115.04 |
| 54.7  | 1785.65 |
| 54.71 | 1525.6  |
| 54.72 | 1594.95 |
| 54.73 | 1612.28 |
| 54.74 | 1802.98 |
| 54.75 | 1854.99 |



|       |         |
|-------|---------|
| 54.76 | 1629.62 |
| 54.77 | 1716.3  |
| 54.78 | 1941.67 |
| 54.79 | 1716.3  |
| 54.8  | 1646.96 |
| 54.81 | 1750.97 |
| 54.82 | 1542.94 |
| 54.83 | 1733.64 |
| 54.84 | 1698.96 |
| 54.85 | 1560.27 |
| 54.86 | 1456.26 |
| 54.87 | 1854.99 |
| 54.88 | 1750.97 |
| 54.89 | 1802.98 |
| 54.9  | 1629.62 |
| 54.91 | 1716.3  |
| 54.92 | 1525.6  |
| 54.93 | 1664.29 |
| 54.94 | 1473.59 |
| 54.95 | 1334.9  |
| 54.96 | 1542.94 |
| 54.97 | 1473.59 |
| 54.98 | 1594.95 |
| 54.99 | 1473.59 |
| 55    | 1716.3  |
| 55.01 | 1941.67 |
| 55.02 | 1525.6  |
| 55.03 | 1594.95 |
| 55.04 | 1282.89 |
| 55.05 | 1629.62 |
| 55.06 | 1716.3  |
| 55.07 | 1560.27 |
| 55.08 | 1560.27 |
| 55.09 | 1560.27 |
| 55.1  | 1664.29 |
| 55.11 | 1317.56 |
| 55.12 | 1369.57 |
| 55.13 | 1716.3  |
| 55.14 | 1716.3  |
| 55.15 | 1872.33 |
| 55.16 | 1681.63 |
| 55.17 | 1352.24 |
| 55.18 | 1456.26 |
| 55.19 | 1681.63 |

|       |         |
|-------|---------|
| 55.2  | 1733.64 |
| 55.21 | 1646.96 |
| 55.22 | 1785.65 |
| 55.23 | 1265.56 |
| 55.24 | 1698.96 |
| 55.25 | 1733.64 |
| 55.26 | 1456.26 |
| 55.27 | 1560.27 |
| 55.28 | 1317.56 |
| 55.29 | 1560.27 |
| 55.3  | 1508.26 |
| 55.31 | 1664.29 |
| 55.32 | 1456.26 |
| 55.33 | 1473.59 |
| 55.34 | 1733.64 |
| 55.35 | 1629.62 |
| 55.36 | 1542.94 |
| 55.37 | 1490.93 |
| 55.38 | 1785.65 |
| 55.39 | 1924.34 |
| 55.4  | 1785.65 |
| 55.41 | 1733.64 |
| 55.42 | 1733.64 |
| 55.43 | 1802.98 |
| 55.44 | 1716.3  |
| 55.45 | 1629.62 |
| 55.46 | 1438.92 |
| 55.47 | 1681.63 |
| 55.48 | 1629.62 |
| 55.49 | 1698.96 |
| 55.5  | 1802.98 |
| 55.51 | 1612.28 |
| 55.52 | 1508.26 |
| 55.53 | 1560.27 |
| 55.54 | 1525.6  |
| 55.55 | 1629.62 |
| 55.56 | 1612.28 |
| 55.57 | 1386.91 |
| 55.58 | 1733.64 |
| 55.59 | 1560.27 |
| 55.6  | 1473.59 |
| 55.61 | 1681.63 |
| 55.62 | 1577.61 |
| 55.63 | 1750.97 |

|       |         |
|-------|---------|
| 55.64 | 1802.98 |
| 55.65 | 1577.61 |
| 55.66 | 1525.6  |
| 55.67 | 1646.96 |
| 55.68 | 1941.67 |
| 55.69 | 1681.63 |
| 55.7  | 1404.25 |
| 55.71 | 1733.64 |
| 55.72 | 1594.95 |
| 55.73 | 1542.94 |
| 55.74 | 1473.59 |
| 55.75 | 1716.3  |
| 55.76 | 1646.96 |
| 55.77 | 1577.61 |
| 55.78 | 1768.31 |
| 55.79 | 1612.28 |
| 55.8  | 1802.98 |
| 55.81 | 2132.37 |
| 55.82 | 1733.64 |
| 55.83 | 1404.25 |
| 55.84 | 1802.98 |
| 55.85 | 1837.66 |
| 55.86 | 1750.97 |
| 55.87 | 1577.61 |
| 55.88 | 1698.96 |
| 55.89 | 1698.96 |
| 55.9  | 1716.3  |
| 55.91 | 1525.6  |
| 55.92 | 1681.63 |
| 55.93 | 1646.96 |
| 55.94 | 1577.61 |
| 55.95 | 1646.96 |
| 55.96 | 1820.32 |
| 55.97 | 1820.32 |
| 55.98 | 1854.99 |
| 55.99 | 1837.66 |
| 56    | 1837.66 |
| 56.01 | 1698.96 |
| 56.02 | 1508.26 |
| 56.03 | 1750.97 |
| 56.04 | 1733.64 |
| 56.05 | 1681.63 |
| 56.06 | 1560.27 |
| 56.07 | 1473.59 |

|       |         |
|-------|---------|
| 56.08 | 1369.57 |
| 56.09 | 2011.02 |
| 56.1  | 1698.96 |
| 56.11 | 1594.95 |
| 56.12 | 2115.04 |
| 56.13 | 1646.96 |
| 56.14 | 1646.96 |
| 56.15 | 1716.3  |
| 56.16 | 1560.27 |
| 56.17 | 1681.63 |
| 56.18 | 1837.66 |
| 56.19 | 1750.97 |
| 56.2  | 1664.29 |
| 56.21 | 1612.28 |
| 56.22 | 1768.31 |
| 56.23 | 1681.63 |
| 56.24 | 1802.98 |
| 56.25 | 1386.91 |
| 56.26 | 1577.61 |
| 56.27 | 1594.95 |
| 56.28 | 1854.99 |
| 56.29 | 1820.32 |
| 56.3  | 2011.02 |
| 56.31 | 1681.63 |
| 56.32 | 1698.96 |
| 56.33 | 1646.96 |
| 56.34 | 1768.31 |
| 56.35 | 1854.99 |
| 56.36 | 1802.98 |
| 56.37 | 1889.66 |
| 56.38 | 1594.95 |
| 56.39 | 1698.96 |
| 56.4  | 2063.03 |
| 56.41 | 2323.07 |
| 56.42 | 1837.66 |
| 56.43 | 1924.34 |
| 56.44 | 2149.71 |
| 56.45 | 1733.64 |
| 56.46 | 2271.06 |
| 56.47 | 2115.04 |
| 56.48 | 1889.66 |
| 56.49 | 1941.67 |
| 56.5  | 2635.13 |
| 56.51 | 2011.02 |

|       |         |
|-------|---------|
| 56.52 | 2427.09 |
| 56.53 | 2496.44 |
| 56.54 | 2219.06 |
| 56.55 | 2444.43 |
| 56.56 | 2600.46 |
| 56.57 | 2739.15 |
| 56.58 | 2808.49 |
| 56.59 | 2843.16 |
| 56.6  | 2773.82 |
| 56.61 | 3207.23 |
| 56.62 | 3380.59 |
| 56.63 | 3866.01 |
| 56.64 | 3640.64 |
| 56.65 | 3866.01 |
| 56.66 | 4334.09 |
| 56.67 | 3744.66 |
| 56.68 | 3848.67 |
| 56.69 | 4195.4  |
| 56.7  | 4351.43 |
| 56.71 | 4091.38 |
| 56.72 | 4351.43 |
| 56.73 | 4247.41 |
| 56.74 | 4056.71 |
| 56.75 | 4611.47 |
| 56.76 | 4490.12 |
| 56.77 | 4299.42 |
| 56.78 | 4004.7  |
| 56.79 | 3605.97 |
| 56.8  | 3848.67 |
| 56.81 | 3744.66 |
| 56.82 | 3918.02 |
| 56.83 | 3848.67 |
| 56.84 | 3848.67 |
| 56.85 | 3831.34 |
| 56.86 | 3709.98 |
| 56.87 | 3883.35 |
| 56.88 | 3519.28 |
| 56.89 | 3449.94 |
| 56.9  | 3640.64 |
| 56.91 | 2843.16 |
| 56.92 | 3068.54 |
| 56.93 | 2773.82 |
| 56.94 | 2825.83 |
| 56.95 | 3189.89 |

|       |         |
|-------|---------|
| 56.96 | 2791.16 |
| 56.97 | 2600.46 |
| 56.98 | 2808.49 |
| 56.99 | 2600.46 |
| 57    | 2479.1  |
| 57.01 | 2444.43 |
| 57.02 | 2548.45 |
| 57.03 | 2496.44 |
| 57.04 | 2080.36 |
| 57.05 | 2617.79 |
| 57.06 | 2115.04 |
| 57.07 | 2132.37 |
| 57.08 | 2149.71 |
| 57.09 | 2149.71 |
| 57.1  | 2305.74 |
| 57.11 | 2496.44 |
| 57.12 | 2115.04 |
| 57.13 | 2305.74 |
| 57.14 | 1889.66 |
| 57.15 | 1924.34 |
| 57.16 | 1993.68 |
| 57.17 | 2236.39 |
| 57.18 | 2097.7  |
| 57.19 | 2392.42 |
| 57.2  | 2531.11 |
| 57.21 | 2063.03 |
| 57.22 | 2409.76 |
| 57.23 | 2427.09 |
| 57.24 | 2236.39 |
| 57.25 | 2427.09 |
| 57.26 | 2167.05 |
| 57.27 | 2617.79 |
| 57.28 | 2704.47 |
| 57.29 | 2860.5  |
| 57.3  | 2947.18 |
| 57.31 | 3155.22 |
| 57.32 | 3051.2  |
| 57.33 | 3172.56 |
| 57.34 | 3241.9  |
| 57.35 | 3553.96 |
| 57.36 | 3727.32 |
| 57.37 | 3952.69 |
| 57.38 | 3640.64 |
| 57.39 | 4126.06 |

|       |         |
|-------|---------|
| 57.4  | 4247.41 |
| 57.41 | 4143.39 |
| 57.42 | 5027.55 |
| 57.43 | 5010.21 |
| 57.44 | 5408.95 |
| 57.45 | 5547.64 |
| 57.46 | 6119.74 |
| 57.47 | 6483.8  |
| 57.48 | 7038.57 |
| 57.49 | 7263.94 |
| 57.5  | 7992.07 |
| 57.51 | 8685.52 |
| 57.52 | 8494.82 |
| 57.53 | 8720.19 |
| 57.54 | 8737.53 |
| 57.55 | 9344.3  |
| 57.56 | 9118.93 |
| 57.57 | 9101.59 |
| 57.58 | 8841.55 |
| 57.59 | 8009.4  |
| 57.6  | 8044.08 |
| 57.61 | 8356.13 |
| 57.62 | 7957.39 |
| 57.63 | 8044.08 |
| 57.64 | 7957.39 |
| 57.65 | 7125.25 |
| 57.66 | 8026.74 |
| 57.67 | 7367.96 |
| 57.68 | 7385.29 |
| 57.69 | 7073.24 |
| 57.7  | 7194.59 |
| 57.71 | 6917.21 |
| 57.72 | 6709.18 |
| 57.73 | 6501.14 |
| 57.74 | 6171.75 |
| 57.75 | 5582.31 |
| 57.76 | 5478.29 |
| 57.77 | 5374.27 |
| 57.78 | 5148.9  |
| 57.79 | 4542.13 |
| 57.8  | 4264.75 |
| 57.81 | 4160.73 |
| 57.82 | 4108.72 |
| 57.83 | 3935.36 |

|       |         |
|-------|---------|
| 57.84 | 3935.36 |
| 57.85 | 3692.65 |
| 57.86 | 3727.32 |
| 57.87 | 3779.33 |
| 57.88 | 3276.57 |
| 57.89 | 3449.94 |
| 57.9  | 3432.6  |
| 57.91 | 2825.83 |
| 57.92 | 3085.87 |
| 57.93 | 3120.55 |
| 57.94 | 2669.8  |
| 57.95 | 2825.83 |
| 57.96 | 2756.48 |
| 57.97 | 2409.76 |
| 57.98 | 2617.79 |
| 57.99 | 2531.11 |
| 58    | 2479.1  |
| 58.01 | 2652.46 |
| 58.02 | 2721.81 |
| 58.03 | 2288.4  |
| 58.04 | 2427.09 |
| 58.05 | 2583.12 |
| 58.06 | 2392.42 |
| 58.07 | 2323.07 |
| 58.08 | 2635.13 |
| 58.09 | 2323.07 |
| 58.1  | 2739.15 |
| 58.11 | 2635.13 |
| 58.12 | 2427.09 |
| 58.13 | 2721.81 |
| 58.14 | 2704.47 |
| 58.15 | 2548.45 |
| 58.16 | 2496.44 |
| 58.17 | 2981.86 |
| 58.18 | 2825.83 |
| 58.19 | 2964.52 |
| 58.2  | 2617.79 |
| 58.21 | 2375.08 |
| 58.22 | 2531.11 |
| 58.23 | 2531.11 |
| 58.24 | 2565.78 |
| 58.25 | 2461.76 |
| 58.26 | 2721.81 |
| 58.27 | 2479.1  |



|       |         |
|-------|---------|
| 58.28 | 2739.15 |
| 58.29 | 2635.13 |
| 58.3  | 2687.14 |
| 58.31 | 2427.09 |
| 58.32 | 2548.45 |
| 58.33 | 2219.06 |
| 58.34 | 2704.47 |
| 58.35 | 2323.07 |
| 58.36 | 2652.46 |
| 58.37 | 2288.4  |
| 58.38 | 2132.37 |
| 58.39 | 2600.46 |
| 58.4  | 2600.46 |
| 58.41 | 2444.43 |
| 58.42 | 2340.41 |
| 58.43 | 2167.05 |
| 58.44 | 2288.4  |
| 58.45 | 1733.64 |
| 58.46 | 2149.71 |
| 58.47 | 1924.34 |
| 58.48 | 1837.66 |
| 58.49 | 1802.98 |
| 58.5  | 1889.66 |
| 58.51 | 1907    |
| 58.52 | 1924.34 |
| 58.53 | 1785.65 |
| 58.54 | 1750.97 |
| 58.55 | 1976.35 |
| 58.56 | 1837.66 |
| 58.57 | 1560.27 |
| 58.58 | 1872.33 |
| 58.59 | 1802.98 |
| 58.6  | 1750.97 |
| 58.61 | 1560.27 |
| 58.62 | 1681.63 |
| 58.63 | 1646.96 |
| 58.64 | 1508.26 |
| 58.65 | 1525.6  |
| 58.66 | 1577.61 |
| 58.67 | 1646.96 |
| 58.68 | 1802.98 |
| 58.69 | 1716.3  |
| 58.7  | 1854.99 |
| 58.71 | 1681.63 |

|       |         |
|-------|---------|
| 58.72 | 1473.59 |
| 58.73 | 1629.62 |
| 58.74 | 1768.31 |
| 58.75 | 1802.98 |
| 58.76 | 1733.64 |
| 58.77 | 1646.96 |
| 58.78 | 1542.94 |
| 58.79 | 1681.63 |
| 58.8  | 1196.21 |
| 58.81 | 1577.61 |
| 58.82 | 1785.65 |
| 58.83 | 1646.96 |
| 58.84 | 1560.27 |
| 58.85 | 1698.96 |
| 58.86 | 1664.29 |
| 58.87 | 1802.98 |
| 58.88 | 1733.64 |
| 58.89 | 1456.26 |
| 58.9  | 1404.25 |
| 58.91 | 1525.6  |
| 58.92 | 1438.92 |
| 58.93 | 1404.25 |
| 58.94 | 1924.34 |
| 58.95 | 1698.96 |
| 58.96 | 1421.58 |
| 58.97 | 1872.33 |
| 58.98 | 1785.65 |
| 58.99 | 1438.92 |
| 59    | 1750.97 |
| 59.01 | 1698.96 |
| 59.02 | 1646.96 |
| 59.03 | 1560.27 |
| 59.04 | 1629.62 |
| 59.05 | 1490.93 |
| 59.06 | 1542.94 |
| 59.07 | 1594.95 |
| 59.08 | 1490.93 |
| 59.09 | 1334.9  |
| 59.1  | 1317.56 |
| 59.11 | 1716.3  |
| 59.12 | 1872.33 |
| 59.13 | 1872.33 |
| 59.14 | 1681.63 |
| 59.15 | 1733.64 |

|       |         |
|-------|---------|
| 59.16 | 1508.26 |
| 59.17 | 1837.66 |
| 59.18 | 1404.25 |
| 59.19 | 1386.91 |
| 59.2  | 1612.28 |
| 59.21 | 1646.96 |
| 59.22 | 1716.3  |
| 59.23 | 1473.59 |
| 59.24 | 1386.91 |
| 59.25 | 1681.63 |
| 59.26 | 1404.25 |
| 59.27 | 1542.94 |
| 59.28 | 1560.27 |
| 59.29 | 1525.6  |
| 59.3  | 1750.97 |
| 59.31 | 1716.3  |
| 59.32 | 1907    |
| 59.33 | 1334.9  |
| 59.34 | 1508.26 |
| 59.35 | 1612.28 |
| 59.36 | 1525.6  |
| 59.37 | 1664.29 |
| 59.38 | 1230.88 |
| 59.39 | 1508.26 |
| 59.4  | 1317.56 |
| 59.41 | 1594.95 |
| 59.42 | 1577.61 |
| 59.43 | 1525.6  |
| 59.44 | 1542.94 |
| 59.45 | 1525.6  |
| 59.46 | 1542.94 |
| 59.47 | 1594.95 |
| 59.48 | 1213.55 |
| 59.49 | 1404.25 |
| 59.5  | 1629.62 |
| 59.51 | 1438.92 |
| 59.52 | 1300.23 |
| 59.53 | 1733.64 |
| 59.54 | 1386.91 |
| 59.55 | 1421.58 |
| 59.56 | 1594.95 |
| 59.57 | 1646.96 |
| 59.58 | 1664.29 |
| 59.59 | 1473.59 |

|       |         |
|-------|---------|
| 59.6  | 1525.6  |
| 59.61 | 1681.63 |
| 59.62 | 1664.29 |
| 59.63 | 1681.63 |
| 59.64 | 1490.93 |
| 59.65 | 2045.69 |
| 59.66 | 1404.25 |
| 59.67 | 1421.58 |
| 59.68 | 1664.29 |
| 59.69 | 1490.93 |
| 59.7  | 1577.61 |
| 59.71 | 1473.59 |
| 59.72 | 1733.64 |
| 59.73 | 1438.92 |
| 59.74 | 1629.62 |
| 59.75 | 1664.29 |
| 59.76 | 1681.63 |
| 59.77 | 1577.61 |
| 59.78 | 1473.59 |
| 59.79 | 1560.27 |
| 59.8  | 1681.63 |
| 59.81 | 1525.6  |
| 59.82 | 1560.27 |
| 59.83 | 1490.93 |
| 59.84 | 1404.25 |
| 59.85 | 1525.6  |
| 59.86 | 1334.9  |
| 59.87 | 1508.26 |
| 59.88 | 1646.96 |
| 59.89 | 1907    |
| 59.9  | 1542.94 |
| 59.91 | 1664.29 |
| 59.92 | 1352.24 |
| 59.93 | 1542.94 |
| 59.94 | 1456.26 |
| 59.95 | 1594.95 |
| 59.96 | 1473.59 |
| 59.97 | 1438.92 |
| 59.98 | 1438.92 |
| 59.99 | 1664.29 |
| 60    | 1456.26 |
| 60.01 | 1386.91 |
| 60.02 | 1560.27 |
| 60.03 | 1646.96 |

|       |         |
|-------|---------|
| 60.04 | 1629.62 |
| 60.05 | 1594.95 |
| 60.06 | 1369.57 |
| 60.07 | 1386.91 |
| 60.08 | 1664.29 |
| 60.09 | 1716.3  |
| 60.1  | 1508.26 |
| 60.11 | 1438.92 |
| 60.12 | 1577.61 |
| 60.13 | 1681.63 |
| 60.14 | 1577.61 |
| 60.15 | 1837.66 |
| 60.16 | 1612.28 |
| 60.17 | 1490.93 |
| 60.18 | 1542.94 |
| 60.19 | 1473.59 |
| 60.2  | 1508.26 |
| 60.21 | 1508.26 |
| 60.22 | 1646.96 |
| 60.23 | 1594.95 |
| 60.24 | 1577.61 |
| 60.25 | 1698.96 |
| 60.26 | 1542.94 |
| 60.27 | 1560.27 |
| 60.28 | 1716.3  |
| 60.29 | 1837.66 |
| 60.3  | 1473.59 |
| 60.31 | 1490.93 |
| 60.32 | 1560.27 |
| 60.33 | 1802.98 |
| 60.34 | 1612.28 |
| 60.35 | 1334.9  |
| 60.36 | 1785.65 |
| 60.37 | 1750.97 |
| 60.38 | 1629.62 |
| 60.39 | 1629.62 |
| 60.4  | 1594.95 |
| 60.41 | 1820.32 |
| 60.42 | 1959.01 |
| 60.43 | 1629.62 |
| 60.44 | 1664.29 |
| 60.45 | 1681.63 |
| 60.46 | 1785.65 |
| 60.47 | 1768.31 |

|       |         |
|-------|---------|
| 60.48 | 2288.4  |
| 60.49 | 2305.74 |
| 60.5  | 1716.3  |
| 60.51 | 1750.97 |
| 60.52 | 1733.64 |
| 60.53 | 2167.05 |
| 60.54 | 1854.99 |
| 60.55 | 2028.36 |
| 60.56 | 1941.67 |
| 60.57 | 2409.76 |
| 60.58 | 2253.73 |
| 60.59 | 2635.13 |
| 60.6  | 2167.05 |
| 60.61 | 2323.07 |
| 60.62 | 2461.76 |
| 60.63 | 2513.77 |
| 60.64 | 2895.17 |
| 60.65 | 2981.86 |
| 60.66 | 2756.48 |
| 60.67 | 3276.57 |
| 60.68 | 3276.57 |
| 60.69 | 3380.59 |
| 60.7  | 3675.31 |
| 60.71 | 3779.33 |
| 60.72 | 3935.36 |
| 60.73 | 4126.06 |
| 60.74 | 4784.84 |
| 60.75 | 5460.96 |
| 60.76 | 5200.91 |
| 60.77 | 5322.27 |
| 60.78 | 5894.37 |
| 60.79 | 5859.69 |
| 60.8  | 6310.44 |
| 60.81 | 6397.12 |
| 60.82 | 6431.79 |
| 60.83 | 6067.73 |
| 60.84 | 6553.15 |
| 60.85 | 5859.69 |
| 60.86 | 6154.41 |
| 60.87 | 5547.64 |
| 60.88 | 5686.33 |
| 60.89 | 5668.99 |
| 60.9  | 5773.01 |
| 60.91 | 5270.26 |

|       |         |
|-------|---------|
| 60.92 | 4992.87 |
| 60.93 | 5356.94 |
| 60.94 | 5010.21 |
| 60.95 | 4819.51 |
| 60.96 | 5564.98 |
| 60.97 | 5148.9  |
| 60.98 | 5582.31 |
| 60.99 | 5183.57 |
| 61    | 5027.55 |
| 61.01 | 5044.88 |
| 61.02 | 5062.22 |
| 61.03 | 5010.21 |
| 61.04 | 5027.55 |
| 61.05 | 4680.82 |
| 61.06 | 5044.88 |
| 61.07 | 5131.57 |
| 61.08 | 4871.52 |
| 61.09 | 4438.11 |
| 61.1  | 4732.83 |
| 61.11 | 5027.55 |
| 61.12 | 4386.1  |
| 61.13 | 4923.53 |
| 61.14 | 5460.96 |
| 61.15 | 4299.42 |
| 61.16 | 4247.41 |
| 61.17 | 4507.46 |
| 61.18 | 4126.06 |
| 61.19 | 3831.34 |
| 61.2  | 3848.67 |
| 61.21 | 3796.67 |
| 61.22 | 4195.4  |
| 61.23 | 3484.61 |
| 61.24 | 3744.66 |
| 61.25 | 3779.33 |
| 61.26 | 3814    |
| 61.27 | 4004.7  |
| 61.28 | 3918.02 |
| 61.29 | 4247.41 |
| 61.3  | 4039.37 |
| 61.31 | 3692.65 |
| 61.32 | 3536.62 |
| 61.33 | 3328.58 |
| 61.34 | 3744.66 |
| 61.35 | 3588.63 |

|       |         |
|-------|---------|
| 61.36 | 3293.91 |
| 61.37 | 3779.33 |
| 61.38 | 4230.07 |
| 61.39 | 3970.03 |
| 61.4  | 3397.93 |
| 61.41 | 4039.37 |
| 61.42 | 4334.09 |
| 61.43 | 4247.41 |
| 61.44 | 4160.73 |
| 61.45 | 3935.36 |
| 61.46 | 4178.07 |
| 61.47 | 3987.37 |
| 61.48 | 3571.29 |
| 61.49 | 4386.1  |
| 61.5  | 4091.38 |
| 61.51 | 4455.45 |
| 61.52 | 4178.07 |
| 61.53 | 4143.39 |
| 61.54 | 4022.04 |
| 61.55 | 4230.07 |
| 61.56 | 4091.38 |
| 61.57 | 4178.07 |
| 61.58 | 3484.61 |
| 61.59 | 3987.37 |
| 61.6  | 3900.68 |
| 61.61 | 3744.66 |
| 61.62 | 3848.67 |
| 61.63 | 3207.23 |
| 61.64 | 3397.93 |
| 61.65 | 3449.94 |
| 61.66 | 3345.92 |
| 61.67 | 3397.93 |
| 61.68 | 3051.2  |
| 61.69 | 2877.84 |
| 61.7  | 2929.85 |
| 61.71 | 2635.13 |
| 61.72 | 3103.21 |
| 61.73 | 2652.46 |
| 61.74 | 2513.77 |
| 61.75 | 2565.78 |
| 61.76 | 1907    |
| 61.77 | 2548.45 |
| 61.78 | 2219.06 |
| 61.79 | 2305.74 |



|       |         |
|-------|---------|
| 61.8  | 2115.04 |
| 61.81 | 2548.45 |
| 61.82 | 2184.38 |
| 61.83 | 2409.76 |
| 61.84 | 2080.36 |
| 61.85 | 1941.67 |
| 61.86 | 2028.36 |
| 61.87 | 2323.07 |
| 61.88 | 2063.03 |
| 61.89 | 2184.38 |
| 61.9  | 1820.32 |
| 61.91 | 2184.38 |
| 61.92 | 1993.68 |
| 61.93 | 1854.99 |
| 61.94 | 1577.61 |
| 61.95 | 1577.61 |
| 61.96 | 1681.63 |
| 61.97 | 1907    |
| 61.98 | 1750.97 |
| 61.99 | 1889.66 |
| 62    | 1525.6  |
| 62.01 | 1248.22 |
| 62.02 | 1334.9  |
| 62.03 | 1750.97 |
| 62.04 | 1907    |
| 62.05 | 1681.63 |
| 62.06 | 1733.64 |
| 62.07 | 1698.96 |
| 62.08 | 1872.33 |
| 62.09 | 1837.66 |
| 62.1  | 2028.36 |
| 62.11 | 1456.26 |
| 62.12 | 1525.6  |
| 62.13 | 1508.26 |
| 62.14 | 1768.31 |
| 62.15 | 1698.96 |
| 62.16 | 1542.94 |
| 62.17 | 1698.96 |
| 62.18 | 1907    |
| 62.19 | 1404.25 |
| 62.2  | 1508.26 |
| 62.21 | 1820.32 |
| 62.22 | 1698.96 |
| 62.23 | 1560.27 |

|       |         |
|-------|---------|
| 62.24 | 1594.95 |
| 62.25 | 1629.62 |
| 62.26 | 1733.64 |
| 62.27 | 2063.03 |
| 62.28 | 1612.28 |
| 62.29 | 1716.3  |
| 62.3  | 1594.95 |
| 62.31 | 1681.63 |
| 62.32 | 1404.25 |
| 62.33 | 1820.32 |
| 62.34 | 1352.24 |
| 62.35 | 1542.94 |
| 62.36 | 1456.26 |
| 62.37 | 1473.59 |
| 62.38 | 1716.3  |
| 62.39 | 1508.26 |
| 62.4  | 1438.92 |
| 62.41 | 1300.23 |
| 62.42 | 1716.3  |
| 62.43 | 1594.95 |
| 62.44 | 1456.26 |
| 62.45 | 1404.25 |
| 62.46 | 1404.25 |
| 62.47 | 1317.56 |
| 62.48 | 1560.27 |
| 62.49 | 1352.24 |
| 62.5  | 1612.28 |
| 62.51 | 1542.94 |
| 62.52 | 1612.28 |
| 62.53 | 1282.89 |
| 62.54 | 1542.94 |
| 62.55 | 1456.26 |
| 62.56 | 1525.6  |
| 62.57 | 1490.93 |
| 62.58 | 1282.89 |
| 62.59 | 1334.9  |
| 62.6  | 1577.61 |
| 62.61 | 1698.96 |
| 62.62 | 1733.64 |
| 62.63 | 1473.59 |
| 62.64 | 1681.63 |
| 62.65 | 1629.62 |
| 62.66 | 1681.63 |
| 62.67 | 1612.28 |

|       |         |
|-------|---------|
| 62.68 | 1456.26 |
| 62.69 | 1733.64 |
| 62.7  | 1456.26 |
| 62.71 | 1646.96 |
| 62.72 | 1577.61 |
| 62.73 | 1334.9  |
| 62.74 | 1334.9  |
| 62.75 | 1438.92 |
| 62.76 | 1612.28 |
| 62.77 | 1629.62 |
| 62.78 | 1560.27 |
| 62.79 | 1386.91 |
| 62.8  | 1664.29 |
| 62.81 | 1404.25 |
| 62.82 | 1508.26 |
| 62.83 | 1560.27 |
| 62.84 | 1577.61 |
| 62.85 | 1508.26 |
| 62.86 | 1490.93 |
| 62.87 | 1369.57 |
| 62.88 | 1525.6  |
| 62.89 | 1473.59 |
| 62.9  | 1386.91 |
| 62.91 | 1594.95 |
| 62.92 | 1733.64 |
| 62.93 | 1629.62 |
| 62.94 | 2045.69 |
| 62.95 | 1889.66 |
| 62.96 | 1698.96 |
| 62.97 | 1802.98 |
| 62.98 | 1577.61 |
| 62.99 | 2115.04 |
| 63    | 1976.35 |
| 63.01 | 1924.34 |
| 63.02 | 2028.36 |
| 63.03 | 2392.42 |
| 63.04 | 2080.36 |
| 63.05 | 2219.06 |
| 63.06 | 2288.4  |
| 63.07 | 2115.04 |
| 63.08 | 2461.76 |
| 63.09 | 2236.39 |
| 63.1  | 2565.78 |
| 63.11 | 2236.39 |

|       |         |
|-------|---------|
| 63.12 | 2756.48 |
| 63.13 | 2669.8  |
| 63.14 | 2704.47 |
| 63.15 | 2981.86 |
| 63.16 | 2947.18 |
| 63.17 | 2912.51 |
| 63.18 | 3189.89 |
| 63.19 | 2999.19 |
| 63.2  | 2843.16 |
| 63.21 | 2912.51 |
| 63.22 | 3189.89 |
| 63.23 | 3103.21 |
| 63.24 | 2947.18 |
| 63.25 | 2912.51 |
| 63.26 | 2999.19 |
| 63.27 | 2999.19 |
| 63.28 | 2652.46 |
| 63.29 | 2548.45 |
| 63.3  | 2843.16 |
| 63.31 | 2756.48 |
| 63.32 | 2721.81 |
| 63.33 | 2704.47 |
| 63.34 | 2340.41 |
| 63.35 | 2548.45 |
| 63.36 | 2444.43 |
| 63.37 | 2427.09 |
| 63.38 | 2219.06 |
| 63.39 | 2375.08 |
| 63.4  | 2531.11 |
| 63.41 | 2288.4  |
| 63.42 | 2288.4  |
| 63.43 | 2288.4  |
| 63.44 | 2045.69 |
| 63.45 | 2201.72 |
| 63.46 | 1959.01 |
| 63.47 | 1941.67 |
| 63.48 | 2565.78 |
| 63.49 | 2045.69 |
| 63.5  | 2045.69 |
| 63.51 | 1768.31 |
| 63.52 | 1646.96 |
| 63.53 | 1750.97 |
| 63.54 | 1854.99 |
| 63.55 | 1612.28 |

|       |         |
|-------|---------|
| 63.56 | 1820.32 |
| 63.57 | 1785.65 |
| 63.58 | 1213.55 |
| 63.59 | 1456.26 |
| 63.6  | 1438.92 |
| 63.61 | 1629.62 |
| 63.62 | 1733.64 |
| 63.63 | 1785.65 |
| 63.64 | 1508.26 |
| 63.65 | 1525.6  |
| 63.66 | 1300.23 |
| 63.67 | 1646.96 |
| 63.68 | 1248.22 |
| 63.69 | 1525.6  |
| 63.7  | 1525.6  |
| 63.71 | 1837.66 |
| 63.72 | 1716.3  |
| 63.73 | 1456.26 |
| 63.74 | 1352.24 |
| 63.75 | 1213.55 |
| 63.76 | 1421.58 |
| 63.77 | 1976.35 |
| 63.78 | 1664.29 |
| 63.79 | 1542.94 |
| 63.8  | 1248.22 |
| 63.81 | 1612.28 |
| 63.82 | 1560.27 |
| 63.83 | 1421.58 |
| 63.84 | 1542.94 |
| 63.85 | 1404.25 |
| 63.86 | 1560.27 |
| 63.87 | 1404.25 |
| 63.88 | 1560.27 |
| 63.89 | 1594.95 |
| 63.9  | 1646.96 |
| 63.91 | 1542.94 |
| 63.92 | 1386.91 |
| 63.93 | 1733.64 |
| 63.94 | 1612.28 |
| 63.95 | 1560.27 |
| 63.96 | 1560.27 |
| 63.97 | 1282.89 |
| 63.98 | 1490.93 |
| 63.99 | 1317.56 |

|       |         |
|-------|---------|
| 64    | 1334.9  |
| 64.01 | 1282.89 |
| 64.02 | 1646.96 |
| 64.03 | 1612.28 |
| 64.04 | 1525.6  |
| 64.05 | 1490.93 |
| 64.06 | 1386.91 |
| 64.07 | 1438.92 |
| 64.08 | 1612.28 |
| 64.09 | 1369.57 |
| 64.1  | 1386.91 |
| 64.11 | 1352.24 |
| 64.12 | 1490.93 |
| 64.13 | 1438.92 |
| 64.14 | 1508.26 |
| 64.15 | 1317.56 |
| 64.16 | 1230.88 |
| 64.17 | 1282.89 |
| 64.18 | 1646.96 |
| 64.19 | 1560.27 |
| 64.2  | 1386.91 |
| 64.21 | 1352.24 |
| 64.22 | 1421.58 |
| 64.23 | 1265.56 |
| 64.24 | 1334.9  |
| 64.25 | 1421.58 |
| 64.26 | 1230.88 |
| 64.27 | 1386.91 |
| 64.28 | 1334.9  |
| 64.29 | 1456.26 |
| 64.3  | 1629.62 |
| 64.31 | 1629.62 |
| 64.32 | 1525.6  |
| 64.33 | 1629.62 |
| 64.34 | 1386.91 |
| 64.35 | 1750.97 |
| 64.36 | 1525.6  |
| 64.37 | 1698.96 |
| 64.38 | 1525.6  |
| 64.39 | 1473.59 |
| 64.4  | 1629.62 |
| 64.41 | 1594.95 |
| 64.42 | 1404.25 |
| 64.43 | 1681.63 |

|       |         |
|-------|---------|
| 64.44 | 1785.65 |
| 64.45 | 1664.29 |
| 64.46 | 1560.27 |
| 64.47 | 1768.31 |
| 64.48 | 1924.34 |
| 64.49 | 1629.62 |
| 64.5  | 1924.34 |
| 64.51 | 1681.63 |
| 64.52 | 1907    |
| 64.53 | 1941.67 |
| 64.54 | 2028.36 |
| 64.55 | 2115.04 |
| 64.56 | 2045.69 |
| 64.57 | 2132.37 |
| 64.58 | 2219.06 |
| 64.59 | 2219.06 |
| 64.6  | 2375.08 |
| 64.61 | 2635.13 |
| 64.62 | 2860.5  |
| 64.63 | 2600.46 |
| 64.64 | 2808.49 |
| 64.65 | 2652.46 |
| 64.66 | 2964.52 |
| 64.67 | 2912.51 |
| 64.68 | 3276.57 |
| 64.69 | 3918.02 |
| 64.7  | 4160.73 |
| 64.71 | 3727.32 |
| 64.72 | 4230.07 |
| 64.73 | 4628.81 |
| 64.74 | 5062.22 |
| 64.75 | 5547.64 |
| 64.76 | 5200.91 |
| 64.77 | 5582.31 |
| 64.78 | 5825.02 |
| 64.79 | 5616.98 |
| 64.8  | 5894.37 |
| 64.81 | 5790.35 |
| 64.82 | 5877.03 |
| 64.83 | 5807.68 |
| 64.84 | 6206.42 |
| 64.85 | 5963.71 |
| 64.86 | 5200.91 |
| 64.87 | 5166.24 |

|       |         |
|-------|---------|
| 64.88 | 5790.35 |
| 64.89 | 5599.65 |
| 64.9  | 4715.49 |
| 64.91 | 4854.18 |
| 64.92 | 5339.6  |
| 64.93 | 5374.27 |
| 64.94 | 4767.5  |
| 64.95 | 4472.78 |
| 64.96 | 5270.26 |
| 64.97 | 5512.97 |
| 64.98 | 4802.17 |
| 64.99 | 4559.47 |
| 65    | 4455.45 |
| 65.01 | 4334.09 |
| 65.02 | 4282.08 |
| 65.03 | 4264.75 |
| 65.04 | 4108.72 |
| 65.05 | 3519.28 |
| 65.06 | 3415.26 |
| 65.07 | 3605.97 |
| 65.08 | 3380.59 |
| 65.09 | 3207.23 |
| 65.1  | 2964.52 |
| 65.11 | 3051.2  |
| 65.12 | 3155.22 |
| 65.13 | 2687.14 |
| 65.14 | 2721.81 |
| 65.15 | 2669.8  |
| 65.16 | 2479.1  |
| 65.17 | 2392.42 |
| 65.18 | 2427.09 |
| 65.19 | 2115.04 |
| 65.2  | 2045.69 |
| 65.21 | 2132.37 |
| 65.22 | 2028.36 |
| 65.23 | 2565.78 |
| 65.24 | 2305.74 |
| 65.25 | 2288.4  |
| 65.26 | 1976.35 |
| 65.27 | 2063.03 |
| 65.28 | 2201.72 |
| 65.29 | 2045.69 |
| 65.3  | 2201.72 |
| 65.31 | 1924.34 |



|       |         |
|-------|---------|
| 65.32 | 2184.38 |
| 65.33 | 1837.66 |
| 65.34 | 2011.02 |
| 65.35 | 2167.05 |
| 65.36 | 2357.75 |
| 65.37 | 2115.04 |
| 65.38 | 1959.01 |
| 65.39 | 2219.06 |
| 65.4  | 2305.74 |
| 65.41 | 1976.35 |
| 65.42 | 2149.71 |
| 65.43 | 2080.36 |
| 65.44 | 2236.39 |
| 65.45 | 2063.03 |
| 65.46 | 2340.41 |
| 65.47 | 2600.46 |
| 65.48 | 2236.39 |
| 65.49 | 2288.4  |
| 65.5  | 2635.13 |
| 65.51 | 2548.45 |
| 65.52 | 2669.8  |
| 65.53 | 2271.06 |
| 65.54 | 2877.84 |
| 65.55 | 2704.47 |
| 65.56 | 2981.86 |
| 65.57 | 2981.86 |
| 65.58 | 3293.91 |
| 65.59 | 2981.86 |
| 65.6  | 3068.54 |
| 65.61 | 3952.69 |
| 65.62 | 3727.32 |
| 65.63 | 3727.32 |
| 65.64 | 4039.37 |
| 65.65 | 4143.39 |
| 65.66 | 4490.12 |
| 65.67 | 4663.48 |
| 65.68 | 4802.17 |
| 65.69 | 4663.48 |
| 65.7  | 4611.47 |
| 65.71 | 4472.78 |
| 65.72 | 4611.47 |
| 65.73 | 4559.47 |
| 65.74 | 4594.14 |
| 65.75 | 5096.89 |

|       |         |
|-------|---------|
| 65.76 | 4750.17 |
| 65.77 | 4403.44 |
| 65.78 | 4507.46 |
| 65.79 | 4420.77 |
| 65.8  | 4091.38 |
| 65.81 | 4108.72 |
| 65.82 | 3883.35 |
| 65.83 | 3935.36 |
| 65.84 | 3900.68 |
| 65.85 | 3779.33 |
| 65.86 | 3293.91 |
| 65.87 | 4022.04 |
| 65.88 | 3657.97 |
| 65.89 | 3328.58 |
| 65.9  | 3709.98 |
| 65.91 | 3432.6  |
| 65.92 | 3276.57 |
| 65.93 | 3172.56 |
| 65.94 | 3432.6  |
| 65.95 | 2843.16 |
| 65.96 | 2323.07 |
| 65.97 | 2600.46 |
| 65.98 | 2843.16 |
| 65.99 | 2531.11 |
| 66    | 2773.82 |
| 66.01 | 2409.76 |
| 66.02 | 2357.75 |
| 66.03 | 2063.03 |
| 66.04 | 2149.71 |
| 66.05 | 1993.68 |
| 66.06 | 2167.05 |
| 66.07 | 1976.35 |
| 66.08 | 1959.01 |
| 66.09 | 2149.71 |
| 66.1  | 2028.36 |
| 66.11 | 1889.66 |
| 66.12 | 2184.38 |
| 66.13 | 2063.03 |
| 66.14 | 1872.33 |
| 66.15 | 2028.36 |
| 66.16 | 1768.31 |
| 66.17 | 1577.61 |
| 66.18 | 1646.96 |
| 66.19 | 1802.98 |

|       |         |
|-------|---------|
| 66.2  | 1646.96 |
| 66.21 | 1837.66 |
| 66.22 | 1837.66 |
| 66.23 | 1612.28 |
| 66.24 | 1438.92 |
| 66.25 | 1629.62 |
| 66.26 | 1646.96 |
| 66.27 | 1473.59 |
| 66.28 | 1664.29 |
| 66.29 | 1508.26 |
| 66.3  | 1646.96 |
| 66.31 | 1525.6  |
| 66.32 | 1612.28 |
| 66.33 | 1577.61 |
| 66.34 | 1560.27 |
| 66.35 | 1560.27 |
| 66.36 | 1594.95 |
| 66.37 | 1629.62 |
| 66.38 | 1542.94 |
| 66.39 | 1594.95 |
| 66.4  | 1490.93 |
| 66.41 | 1404.25 |
| 66.42 | 1317.56 |
| 66.43 | 1334.9  |
| 66.44 | 1490.93 |
| 66.45 | 1612.28 |
| 66.46 | 1404.25 |
| 66.47 | 1317.56 |
| 66.48 | 1594.95 |
| 66.49 | 1594.95 |
| 66.5  | 1490.93 |
| 66.51 | 1490.93 |
| 66.52 | 1282.89 |
| 66.53 | 1317.56 |
| 66.54 | 1300.23 |
| 66.55 | 1698.96 |
| 66.56 | 1473.59 |
| 66.57 | 1421.58 |
| 66.58 | 1300.23 |
| 66.59 | 1265.56 |
| 66.6  | 1265.56 |
| 66.61 | 1369.57 |
| 66.62 | 1248.22 |
| 66.63 | 1438.92 |

|       |         |
|-------|---------|
| 66.64 | 1404.25 |
| 66.65 | 1473.59 |
| 66.66 | 1317.56 |
| 66.67 | 1508.26 |
| 66.68 | 1213.55 |
| 66.69 | 1248.22 |
| 66.7  | 1352.24 |
| 66.71 | 1334.9  |
| 66.72 | 1230.88 |
| 66.73 | 1126.86 |
| 66.74 | 1230.88 |
| 66.75 | 1196.21 |
| 66.76 | 1421.58 |
| 66.77 | 1300.23 |
| 66.78 | 1317.56 |
| 66.79 | 1404.25 |
| 66.8  | 1213.55 |
| 66.81 | 1161.54 |
| 66.82 | 1334.9  |
| 66.83 | 1265.56 |
| 66.84 | 1213.55 |
| 66.85 | 1248.22 |
| 66.86 | 1178.87 |
| 66.87 | 1109.53 |
| 66.88 | 1161.54 |
| 66.89 | 1386.91 |
| 66.9  | 1126.86 |
| 66.91 | 1352.24 |
| 66.92 | 1421.58 |
| 66.93 | 1334.9  |
| 66.94 | 1421.58 |
| 66.95 | 1300.23 |
| 66.96 | 1317.56 |
| 66.97 | 1196.21 |
| 66.98 | 1282.89 |
| 66.99 | 1178.87 |
| 67    | 1404.25 |
| 67.01 | 1265.56 |
| 67.02 | 1196.21 |
| 67.03 | 1126.86 |
| 67.04 | 1126.86 |
| 67.05 | 1421.58 |
| 67.06 | 1196.21 |
| 67.07 | 1248.22 |

|       |         |
|-------|---------|
| 67.08 | 1300.23 |
| 67.09 | 1421.58 |
| 67.1  | 1300.23 |
| 67.11 | 1248.22 |
| 67.12 | 1196.21 |
| 67.13 | 1057.52 |
| 67.14 | 1022.85 |
| 67.15 | 1213.55 |
| 67.16 | 1369.57 |
| 67.17 | 1230.88 |
| 67.18 | 1508.26 |
| 67.19 | 1074.85 |
| 67.2  | 1109.53 |
| 67.21 | 1282.89 |
| 67.22 | 1265.56 |
| 67.23 | 1178.87 |
| 67.24 | 1144.2  |
| 67.25 | 1317.56 |
| 67.26 | 1317.56 |
| 67.27 | 1317.56 |
| 67.28 | 1612.28 |
| 67.29 | 1352.24 |
| 67.3  | 1230.88 |
| 67.31 | 1369.57 |
| 67.32 | 1265.56 |
| 67.33 | 1074.85 |
| 67.34 | 1265.56 |
| 67.35 | 1386.91 |
| 67.36 | 1196.21 |
| 67.37 | 1022.85 |
| 67.38 | 1317.56 |
| 67.39 | 1092.19 |
| 67.4  | 1438.92 |
| 67.41 | 1352.24 |
| 67.42 | 1109.53 |
| 67.43 | 1040.18 |
| 67.44 | 1317.56 |
| 67.45 | 1144.2  |
| 67.46 | 1352.24 |
| 67.47 | 1490.93 |
| 67.48 | 1178.87 |
| 67.49 | 1074.85 |
| 67.5  | 1178.87 |
| 67.51 | 1508.26 |

|       |         |
|-------|---------|
| 67.52 | 1334.9  |
| 67.53 | 1213.55 |
| 67.54 | 1456.26 |
| 67.55 | 1473.59 |
| 67.56 | 1300.23 |
| 67.57 | 1265.56 |
| 67.58 | 1456.26 |
| 67.59 | 1161.54 |
| 67.6  | 1161.54 |
| 67.61 | 1126.86 |
| 67.62 | 1317.56 |
| 67.63 | 970.837 |
| 67.64 | 1213.55 |
| 67.65 | 1352.24 |
| 67.66 | 1300.23 |
| 67.67 | 1196.21 |
| 67.68 | 1404.25 |
| 67.69 | 1144.2  |
| 67.7  | 1161.54 |
| 67.71 | 1438.92 |
| 67.72 | 1317.56 |
| 67.73 | 1022.85 |
| 67.74 | 1178.87 |
| 67.75 | 1248.22 |
| 67.76 | 1161.54 |
| 67.77 | 1300.23 |
| 67.78 | 1213.55 |
| 67.79 | 1144.2  |
| 67.8  | 1334.9  |
| 67.81 | 1040.18 |
| 67.82 | 1196.21 |
| 67.83 | 1040.18 |
| 67.84 | 1230.88 |
| 67.85 | 1594.95 |
| 67.86 | 1369.57 |
| 67.87 | 901.491 |
| 67.88 | 918.828 |
| 67.89 | 1265.56 |
| 67.9  | 1196.21 |
| 67.91 | 1196.21 |
| 67.92 | 1334.9  |
| 67.93 | 1265.56 |
| 67.94 | 1178.87 |
| 67.95 | 1109.53 |

|       |         |
|-------|---------|
| 67.96 | 1213.55 |
| 67.97 | 1369.57 |
| 67.98 | 1109.53 |
| 67.99 | 1022.85 |
| 68    | 1196.21 |
| 68.01 | 1334.9  |
| 68.02 | 1196.21 |
| 68.03 | 1144.2  |
| 68.04 | 1248.22 |
| 68.05 | 1317.56 |
| 68.06 | 1282.89 |
| 68.07 | 1092.19 |
| 68.08 | 1161.54 |
| 68.09 | 1230.88 |
| 68.1  | 1144.2  |
| 68.11 | 1126.86 |
| 68.12 | 1178.87 |
| 68.13 | 1317.56 |
| 68.14 | 1248.22 |
| 68.15 | 1074.85 |
| 68.16 | 1144.2  |
| 68.17 | 1196.21 |
| 68.18 | 1178.87 |
| 68.19 | 1196.21 |
| 68.2  | 1300.23 |
| 68.21 | 1196.21 |
| 68.22 | 1282.89 |
| 68.23 | 1178.87 |
| 68.24 | 1438.92 |
| 68.25 | 1456.26 |
| 68.26 | 1352.24 |
| 68.27 | 1074.85 |
| 68.28 | 1594.95 |
| 68.29 | 1334.9  |
| 68.3  | 1265.56 |
| 68.31 | 1334.9  |
| 68.32 | 1404.25 |
| 68.33 | 1265.56 |
| 68.34 | 1196.21 |
| 68.35 | 1594.95 |
| 68.36 | 1248.22 |
| 68.37 | 1161.54 |
| 68.38 | 1178.87 |
| 68.39 | 1196.21 |

|       |         |
|-------|---------|
| 68.4  | 1230.88 |
| 68.41 | 1265.56 |
| 68.42 | 1005.51 |
| 68.43 | 1213.55 |
| 68.44 | 1282.89 |
| 68.45 | 1022.85 |
| 68.46 | 1196.21 |
| 68.47 | 1178.87 |
| 68.48 | 1196.21 |
| 68.49 | 1282.89 |
| 68.5  | 1300.23 |
| 68.51 | 1282.89 |
| 68.52 | 1300.23 |
| 68.53 | 1126.86 |
| 68.54 | 1421.58 |
| 68.55 | 1144.2  |
| 68.56 | 1040.18 |
| 68.57 | 1230.88 |
| 68.58 | 1300.23 |
| 68.59 | 1282.89 |
| 68.6  | 1092.19 |
| 68.61 | 1438.92 |
| 68.62 | 1369.57 |
| 68.63 | 1248.22 |
| 68.64 | 1421.58 |
| 68.65 | 988.173 |
| 68.66 | 1109.53 |
| 68.67 | 1109.53 |
| 68.68 | 953.5   |
| 68.69 | 1369.57 |
| 68.7  | 1438.92 |
| 68.71 | 1230.88 |
| 68.72 | 1057.52 |
| 68.73 | 1317.56 |
| 68.74 | 1369.57 |
| 68.75 | 1490.93 |
| 68.76 | 1300.23 |
| 68.77 | 1334.9  |
| 68.78 | 1421.58 |
| 68.79 | 1265.56 |
| 68.8  | 1317.56 |
| 68.81 | 1282.89 |
| 68.82 | 1161.54 |
| 68.83 | 1074.85 |



|       |         |
|-------|---------|
| 68.84 | 1092.19 |
| 68.85 | 1161.54 |
| 68.86 | 1213.55 |
| 68.87 | 1144.2  |
| 68.88 | 1386.91 |
| 68.89 | 1265.56 |
| 68.9  | 1612.28 |
| 68.91 | 1248.22 |
| 68.92 | 1282.89 |
| 68.93 | 1386.91 |
| 68.94 | 1213.55 |
| 68.95 | 1196.21 |
| 68.96 | 1542.94 |
| 68.97 | 1074.85 |
| 68.98 | 1508.26 |
| 68.99 | 1334.9  |
| 69    | 1352.24 |
| 69.01 | 1386.91 |
| 69.02 | 1282.89 |
| 69.03 | 1404.25 |
| 69.04 | 1282.89 |
| 69.05 | 1109.53 |
| 69.06 | 1213.55 |
| 69.07 | 1161.54 |
| 69.08 | 1438.92 |
| 69.09 | 1178.87 |
| 69.1  | 1196.21 |
| 69.11 | 1473.59 |
| 69.12 | 1577.61 |
| 69.13 | 1560.27 |
| 69.14 | 1612.28 |
| 69.15 | 1508.26 |
| 69.16 | 1456.26 |
| 69.17 | 1785.65 |
| 69.18 | 1594.95 |
| 69.19 | 1594.95 |
| 69.2  | 1577.61 |
| 69.21 | 1612.28 |
| 69.22 | 1837.66 |
| 69.23 | 2063.03 |
| 69.24 | 1560.27 |
| 69.25 | 1785.65 |
| 69.26 | 2149.71 |
| 69.27 | 2236.39 |

|       |         |
|-------|---------|
| 69.28 | 2097.7  |
| 69.29 | 2063.03 |
| 69.3  | 1976.35 |
| 69.31 | 2097.7  |
| 69.32 | 1993.68 |
| 69.33 | 2375.08 |
| 69.34 | 1976.35 |
| 69.35 | 2097.7  |
| 69.36 | 2167.05 |
| 69.37 | 2288.4  |
| 69.38 | 1941.67 |
| 69.39 | 1785.65 |
| 69.4  | 1959.01 |
| 69.41 | 2184.38 |
| 69.42 | 2011.02 |
| 69.43 | 1872.33 |
| 69.44 | 1976.35 |
| 69.45 | 1820.32 |
| 69.46 | 1854.99 |
| 69.47 | 1802.98 |
| 69.48 | 1872.33 |
| 69.49 | 1907    |
| 69.5  | 2028.36 |
| 69.51 | 1924.34 |
| 69.52 | 1577.61 |
| 69.53 | 1733.64 |
| 69.54 | 2011.02 |
| 69.55 | 2011.02 |
| 69.56 | 1577.61 |
| 69.57 | 1473.59 |
| 69.58 | 1473.59 |
| 69.59 | 1560.27 |
| 69.6  | 1577.61 |
| 69.61 | 1525.6  |
| 69.62 | 1352.24 |
| 69.63 | 1490.93 |
| 69.64 | 1525.6  |
| 69.65 | 1681.63 |
| 69.66 | 1421.58 |
| 69.67 | 1317.56 |
| 69.68 | 1352.24 |
| 69.69 | 1369.57 |
| 69.7  | 1525.6  |
| 69.71 | 1386.91 |

|       |         |
|-------|---------|
| 69.72 | 1508.26 |
| 69.73 | 1404.25 |
| 69.74 | 1456.26 |
| 69.75 | 1282.89 |
| 69.76 | 1386.91 |
| 69.77 | 1196.21 |
| 69.78 | 1317.56 |
| 69.79 | 1144.2  |
| 69.8  | 1248.22 |
| 69.81 | 1196.21 |
| 69.82 | 1282.89 |
| 69.83 | 1248.22 |
| 69.84 | 1317.56 |
| 69.85 | 1092.19 |
| 69.86 | 1161.54 |
| 69.87 | 1282.89 |
| 69.88 | 1213.55 |
| 69.89 | 1456.26 |
| 69.9  | 1126.86 |
| 69.91 | 1265.56 |
| 69.92 | 1421.58 |
| 69.93 | 1282.89 |
| 69.94 | 988.173 |
| 69.95 | 1542.94 |
| 69.96 | 1404.25 |
| 69.97 | 1438.92 |
| 69.98 | 1334.9  |
| 69.99 | 1109.53 |
| 70    | 1334.9  |
| 70.01 | 1144.2  |
| 70.02 | 1404.25 |
| 70.03 | 1300.23 |
| 70.04 | 1369.57 |
| 70.05 | 1577.61 |
| 70.06 | 1386.91 |
| 70.07 | 1612.28 |
| 70.08 | 1629.62 |
| 70.09 | 1612.28 |
| 70.1  | 1508.26 |
| 70.11 | 1560.27 |
| 70.12 | 1577.61 |
| 70.13 | 1577.61 |
| 70.14 | 1438.92 |
| 70.15 | 1629.62 |

|       |         |
|-------|---------|
| 70.16 | 1802.98 |
| 70.17 | 1525.6  |
| 70.18 | 1646.96 |
| 70.19 | 1802.98 |
| 70.2  | 1941.67 |
| 70.21 | 2011.02 |
| 70.22 | 2045.69 |
| 70.23 | 2149.71 |
| 70.24 | 1924.34 |
| 70.25 | 2357.75 |
| 70.26 | 2375.08 |
| 70.27 | 2253.73 |
| 70.28 | 2444.43 |
| 70.29 | 2773.82 |
| 70.3  | 2548.45 |
| 70.31 | 2357.75 |
| 70.32 | 2496.44 |
| 70.33 | 2721.81 |
| 70.34 | 2791.16 |
| 70.35 | 2635.13 |
| 70.36 | 2912.51 |
| 70.37 | 2947.18 |
| 70.38 | 2877.84 |
| 70.39 | 2739.15 |
| 70.4  | 2877.84 |
| 70.41 | 2305.74 |
| 70.42 | 2479.1  |
| 70.43 | 2236.39 |
| 70.44 | 2201.72 |
| 70.45 | 2201.72 |
| 70.46 | 2444.43 |
| 70.47 | 2132.37 |
| 70.48 | 2219.06 |
| 70.49 | 2184.38 |
| 70.5  | 2132.37 |
| 70.51 | 2513.77 |
| 70.52 | 2375.08 |
| 70.53 | 2340.41 |
| 70.54 | 2115.04 |
| 70.55 | 2149.71 |
| 70.56 | 2288.4  |
| 70.57 | 2149.71 |
| 70.58 | 2045.69 |
| 70.59 | 2409.76 |

|       |         |
|-------|---------|
| 70.6  | 2063.03 |
| 70.61 | 1820.32 |
| 70.62 | 1820.32 |
| 70.63 | 1993.68 |
| 70.64 | 2028.36 |
| 70.65 | 1785.65 |
| 70.66 | 1594.95 |
| 70.67 | 1577.61 |
| 70.68 | 1924.34 |
| 70.69 | 1872.33 |
| 70.7  | 1733.64 |
| 70.71 | 1854.99 |
| 70.72 | 1542.94 |
| 70.73 | 1404.25 |
| 70.74 | 1542.94 |
| 70.75 | 1404.25 |
| 70.76 | 1404.25 |
| 70.77 | 1473.59 |
| 70.78 | 1421.58 |
| 70.79 | 1560.27 |
| 70.8  | 1265.56 |
| 70.81 | 1542.94 |
| 70.82 | 1196.21 |
| 70.83 | 1109.53 |
| 70.84 | 1421.58 |
| 70.85 | 1317.56 |
| 70.86 | 1421.58 |
| 70.87 | 1161.54 |
| 70.88 | 1473.59 |
| 70.89 | 1334.9  |
| 70.9  | 1369.57 |
| 70.91 | 1317.56 |
| 70.92 | 1300.23 |
| 70.93 | 1577.61 |
| 70.94 | 1161.54 |
| 70.95 | 1473.59 |
| 70.96 | 1664.29 |
| 70.97 | 1438.92 |
| 70.98 | 1300.23 |
| 70.99 | 1300.23 |
| 71    | 1265.56 |
| 71.01 | 1196.21 |
| 71.02 | 1352.24 |
| 71.03 | 1334.9  |

|       |         |
|-------|---------|
| 71.04 | 1300.23 |
| 71.05 | 1092.19 |
| 71.06 | 1282.89 |
| 71.07 | 1161.54 |
| 71.08 | 1040.18 |
| 71.09 | 1352.24 |
| 71.1  | 1178.87 |
| 71.11 | 1144.2  |
| 71.12 | 1369.57 |
| 71.13 | 1317.56 |
| 71.14 | 1334.9  |
| 71.15 | 1144.2  |
| 71.16 | 1334.9  |
| 71.17 | 1126.86 |
| 71.18 | 901.491 |
| 71.19 | 988.173 |
| 71.2  | 1126.86 |
| 71.21 | 1213.55 |
| 71.22 | 1144.2  |
| 71.23 | 1213.55 |
| 71.24 | 1213.55 |
| 71.25 | 1317.56 |
| 71.26 | 1230.88 |
| 71.27 | 1161.54 |
| 71.28 | 1161.54 |
| 71.29 | 1334.9  |
| 71.3  | 1438.92 |
| 71.31 | 1040.18 |
| 71.32 | 1456.26 |
| 71.33 | 1057.52 |
| 71.34 | 1265.56 |
| 71.35 | 1196.21 |
| 71.36 | 1092.19 |
| 71.37 | 1092.19 |
| 71.38 | 1213.55 |
| 71.39 | 1022.85 |
| 71.4  | 1022.85 |
| 71.41 | 1005.51 |
| 71.42 | 1057.52 |
| 71.43 | 970.837 |
| 71.44 | 988.173 |
| 71.45 | 901.491 |
| 71.46 | 1196.21 |
| 71.47 | 1300.23 |

|       |         |
|-------|---------|
| 71.48 | 1161.54 |
| 71.49 | 1213.55 |
| 71.5  | 1265.56 |
| 71.51 | 1300.23 |
| 71.52 | 1230.88 |
| 71.53 | 1074.85 |
| 71.54 | 901.491 |
| 71.55 | 1126.86 |
| 71.56 | 918.828 |
| 71.57 | 1040.18 |
| 71.58 | 1265.56 |
| 71.59 | 1126.86 |
| 71.6  | 1386.91 |
| 71.61 | 1265.56 |
| 71.62 | 1282.89 |
| 71.63 | 1213.55 |
| 71.64 | 1057.52 |
| 71.65 | 1352.24 |
| 71.66 | 1022.85 |
| 71.67 | 1022.85 |
| 71.68 | 953.5   |
| 71.69 | 1092.19 |
| 71.7  | 1248.22 |
| 71.71 | 1317.56 |
| 71.72 | 1126.86 |
| 71.73 | 884.155 |
| 71.74 | 1057.52 |
| 71.75 | 1161.54 |
| 71.76 | 1178.87 |
| 71.77 | 1230.88 |
| 71.78 | 1161.54 |
| 71.79 | 1040.18 |
| 71.8  | 988.173 |
| 71.81 | 1196.21 |
| 71.82 | 1022.85 |
| 71.83 | 970.837 |
| 71.84 | 1196.21 |
| 71.85 | 1022.85 |
| 71.86 | 1022.85 |
| 71.87 | 918.828 |
| 71.88 | 953.5   |
| 71.89 | 1092.19 |
| 71.9  | 1057.52 |
| 71.91 | 1126.86 |

|       |         |
|-------|---------|
| 71.92 | 1317.56 |
| 71.93 | 1005.51 |
| 71.94 | 1040.18 |
| 71.95 | 918.828 |
| 71.96 | 1092.19 |
| 71.97 | 1178.87 |
| 71.98 | 1074.85 |
| 71.99 | 1074.85 |
| 72    | 1161.54 |
| 72.01 | 1109.53 |
| 72.02 | 1109.53 |
| 72.03 | 1248.22 |
| 72.04 | 1144.2  |
| 72.05 | 1109.53 |
| 72.06 | 936.164 |
| 72.07 | 901.491 |
| 72.08 | 1074.85 |
| 72.09 | 1196.21 |
| 72.1  | 1230.88 |
| 72.11 | 1317.56 |
| 72.12 | 1248.22 |
| 72.13 | 1196.21 |
| 72.14 | 918.828 |
| 72.15 | 1092.19 |
| 72.16 | 866.819 |
| 72.17 | 1144.2  |
| 72.18 | 1300.23 |
| 72.19 | 1040.18 |
| 72.2  | 901.491 |
| 72.21 | 1074.85 |
| 72.22 | 1230.88 |
| 72.23 | 1109.53 |
| 72.24 | 1126.86 |
| 72.25 | 1126.86 |
| 72.26 | 1074.85 |
| 72.27 | 1490.93 |
| 72.28 | 1092.19 |
| 72.29 | 1213.55 |
| 72.3  | 1005.51 |
| 72.31 | 1369.57 |
| 72.32 | 1126.86 |
| 72.33 | 1213.55 |
| 72.34 | 1126.86 |
| 72.35 | 1092.19 |



|       |         |
|-------|---------|
| 72.36 | 1334.9  |
| 72.37 | 988.173 |
| 72.38 | 884.155 |
| 72.39 | 1074.85 |
| 72.4  | 1126.86 |
| 72.41 | 1213.55 |
| 72.42 | 1300.23 |
| 72.43 | 1213.55 |
| 72.44 | 1005.51 |
| 72.45 | 1334.9  |
| 72.46 | 1282.89 |
| 72.47 | 1213.55 |
| 72.48 | 1248.22 |
| 72.49 | 1144.2  |
| 72.5  | 1352.24 |
| 72.51 | 1161.54 |
| 72.52 | 1265.56 |
| 72.53 | 1022.85 |
| 72.54 | 1057.52 |
| 72.55 | 1265.56 |
| 72.56 | 1352.24 |
| 72.57 | 1421.58 |
| 72.58 | 1144.2  |
| 72.59 | 1352.24 |
| 72.6  | 1300.23 |
| 72.61 | 1300.23 |
| 72.62 | 1421.58 |
| 72.63 | 1144.2  |
| 72.64 | 1369.57 |
| 72.65 | 1300.23 |
| 72.66 | 1317.56 |
| 72.67 | 1456.26 |
| 72.68 | 1282.89 |
| 72.69 | 1508.26 |
| 72.7  | 1334.9  |
| 72.71 | 1646.96 |
| 72.72 | 1369.57 |
| 72.73 | 1733.64 |
| 72.74 | 1716.3  |
| 72.75 | 1594.95 |
| 72.76 | 1872.33 |
| 72.77 | 1525.6  |
| 72.78 | 1594.95 |
| 72.79 | 1664.29 |

|       |         |
|-------|---------|
| 72.8  | 1733.64 |
| 72.81 | 1854.99 |
| 72.82 | 1785.65 |
| 72.83 | 1924.34 |
| 72.84 | 1872.33 |
| 72.85 | 1959.01 |
| 72.86 | 2132.37 |
| 72.87 | 2219.06 |
| 72.88 | 1976.35 |
| 72.89 | 2305.74 |
| 72.9  | 2167.05 |
| 72.91 | 2357.75 |
| 72.92 | 2271.06 |
| 72.93 | 2617.79 |
| 72.94 | 2773.82 |
| 72.95 | 3137.88 |
| 72.96 | 3103.21 |
| 72.97 | 3120.55 |
| 72.98 | 3155.22 |
| 72.99 | 3207.23 |
| 73    | 3623.3  |
| 73.01 | 3033.86 |
| 73.02 | 3068.54 |
| 73.03 | 3536.62 |
| 73.04 | 3397.93 |
| 73.05 | 3137.88 |
| 73.06 | 3467.27 |
| 73.07 | 3172.56 |
| 73.08 | 2895.17 |
| 73.09 | 3432.6  |
| 73.1  | 2791.16 |
| 73.11 | 2773.82 |
| 73.12 | 2756.48 |
| 73.13 | 2704.47 |
| 73.14 | 2791.16 |
| 73.15 | 2808.49 |
| 73.16 | 3085.87 |
| 73.17 | 2669.8  |
| 73.18 | 2669.8  |
| 73.19 | 2444.43 |
| 73.2  | 2340.41 |
| 73.21 | 3085.87 |
| 73.22 | 2669.8  |
| 73.23 | 2999.19 |

|       |         |
|-------|---------|
| 73.24 | 2409.76 |
| 73.25 | 2652.46 |
| 73.26 | 2739.15 |
| 73.27 | 2340.41 |
| 73.28 | 2375.08 |
| 73.29 | 1941.67 |
| 73.3  | 2063.03 |
| 73.31 | 2323.07 |
| 73.32 | 1993.68 |
| 73.33 | 1924.34 |
| 73.34 | 2132.37 |
| 73.35 | 1733.64 |
| 73.36 | 1872.33 |
| 73.37 | 2323.07 |
| 73.38 | 1993.68 |
| 73.39 | 1716.3  |
| 73.4  | 1768.31 |
| 73.41 | 1664.29 |
| 73.42 | 1716.3  |
| 73.43 | 1698.96 |
| 73.44 | 1854.99 |
| 73.45 | 1317.56 |
| 73.46 | 1473.59 |
| 73.47 | 1716.3  |
| 73.48 | 1421.58 |
| 73.49 | 1404.25 |
| 73.5  | 1456.26 |
| 73.51 | 1542.94 |
| 73.52 | 1317.56 |
| 73.53 | 1300.23 |
| 73.54 | 1473.59 |
| 73.55 | 1421.58 |
| 73.56 | 1629.62 |
| 73.57 | 1386.91 |
| 73.58 | 1317.56 |
| 73.59 | 1317.56 |
| 73.6  | 1594.95 |
| 73.61 | 1265.56 |
| 73.62 | 1646.96 |
| 73.63 | 1456.26 |
| 73.64 | 1525.6  |
| 73.65 | 1352.24 |
| 73.66 | 1369.57 |
| 73.67 | 1508.26 |

|       |         |
|-------|---------|
| 73.68 | 1490.93 |
| 73.69 | 1646.96 |
| 73.7  | 1560.27 |
| 73.71 | 1542.94 |
| 73.72 | 1560.27 |
| 73.73 | 1612.28 |
| 73.74 | 1525.6  |
| 73.75 | 1716.3  |
| 73.76 | 1612.28 |
| 73.77 | 1837.66 |
| 73.78 | 1837.66 |
| 73.79 | 1560.27 |
| 73.8  | 1733.64 |
| 73.81 | 1698.96 |
| 73.82 | 1889.66 |
| 73.83 | 1629.62 |
| 73.84 | 1352.24 |
| 73.85 | 1352.24 |
| 73.86 | 1542.94 |
| 73.87 | 1560.27 |
| 73.88 | 1508.26 |
| 73.89 | 1490.93 |
| 73.9  | 1594.95 |
| 73.91 | 1750.97 |
| 73.92 | 1577.61 |
| 73.93 | 1456.26 |
| 73.94 | 1386.91 |
| 73.95 | 1421.58 |
| 73.96 | 1681.63 |
| 73.97 | 1369.57 |
| 73.98 | 1421.58 |
| 73.99 | 1490.93 |
| 74    | 1438.92 |
| 74.01 | 1473.59 |
| 74.02 | 1525.6  |
| 74.03 | 1750.97 |
| 74.04 | 1144.2  |
| 74.05 | 1438.92 |
| 74.06 | 1490.93 |
| 74.07 | 1300.23 |
| 74.08 | 1681.63 |
| 74.09 | 1352.24 |
| 74.1  | 1386.91 |
| 74.11 | 1317.56 |

|       |         |
|-------|---------|
| 74.12 | 1386.91 |
| 74.13 | 1577.61 |
| 74.14 | 1508.26 |
| 74.15 | 1282.89 |
| 74.16 | 936.164 |
| 74.17 | 1126.86 |
| 74.18 | 1161.54 |
| 74.19 | 1109.53 |
| 74.2  | 1404.25 |
| 74.21 | 1508.26 |
| 74.22 | 1386.91 |
| 74.23 | 1369.57 |
| 74.24 | 1300.23 |
| 74.25 | 1421.58 |
| 74.26 | 1404.25 |
| 74.27 | 1213.55 |
| 74.28 | 1196.21 |
| 74.29 | 1040.18 |
| 74.3  | 1144.2  |
| 74.31 | 1040.18 |
| 74.32 | 988.173 |
| 74.33 | 953.5   |
| 74.34 | 1230.88 |
| 74.35 | 1126.86 |
| 74.36 | 1196.21 |
| 74.37 | 1352.24 |
| 74.38 | 1178.87 |
| 74.39 | 1265.56 |
| 74.4  | 1248.22 |
| 74.41 | 1178.87 |
| 74.42 | 1265.56 |
| 74.43 | 970.837 |
| 74.44 | 1109.53 |
| 74.45 | 1161.54 |
| 74.46 | 1178.87 |
| 74.47 | 1005.51 |
| 74.48 | 1404.25 |
| 74.49 | 1196.21 |
| 74.5  | 1161.54 |
| 74.51 | 1109.53 |
| 74.52 | 1230.88 |
| 74.53 | 1248.22 |
| 74.54 | 1161.54 |
| 74.55 | 1126.86 |

|       |         |
|-------|---------|
| 74.56 | 1317.56 |
| 74.57 | 1144.2  |
| 74.58 | 1057.52 |
| 74.59 | 1196.21 |
| 74.6  | 1074.85 |
| 74.61 | 953.5   |
| 74.62 | 1213.55 |
| 74.63 | 1282.89 |
| 74.64 | 1230.88 |
| 74.65 | 1196.21 |
| 74.66 | 1196.21 |
| 74.67 | 1161.54 |
| 74.68 | 1230.88 |
| 74.69 | 1092.19 |
| 74.7  | 1282.89 |
| 74.71 | 1369.57 |
| 74.72 | 1369.57 |
| 74.73 | 1196.21 |
| 74.74 | 1178.87 |
| 74.75 | 1178.87 |
| 74.76 | 1248.22 |
| 74.77 | 1265.56 |
| 74.78 | 953.5   |
| 74.79 | 1386.91 |
| 74.8  | 1092.19 |
| 74.81 | 1005.51 |
| 74.82 | 953.5   |
| 74.83 | 1144.2  |
| 74.84 | 1248.22 |
| 74.85 | 1126.86 |
| 74.86 | 1109.53 |
| 74.87 | 832.146 |
| 74.88 | 988.173 |
| 74.89 | 1282.89 |
| 74.9  | 1248.22 |
| 74.91 | 1126.86 |
| 74.92 | 1057.52 |
| 74.93 | 1144.2  |
| 74.94 | 1092.19 |
| 74.95 | 1040.18 |
| 74.96 | 1386.91 |
| 74.97 | 1126.86 |
| 74.98 | 1230.88 |
| 74.99 | 1161.54 |

|       |         |
|-------|---------|
| 75    | 1300.23 |
| 75.01 | 1178.87 |
| 75.02 | 1022.85 |
| 75.03 | 1178.87 |
| 75.04 | 1213.55 |
| 75.05 | 1074.85 |
| 75.06 | 1230.88 |
| 75.07 | 1057.52 |
| 75.08 | 1300.23 |
| 75.09 | 1265.56 |
| 75.1  | 1109.53 |
| 75.11 | 1074.85 |
| 75.12 | 1178.87 |
| 75.13 | 1230.88 |
| 75.14 | 1057.52 |
| 75.15 | 1508.26 |
| 75.16 | 1352.24 |
| 75.17 | 1040.18 |
| 75.18 | 1022.85 |
| 75.19 | 1022.85 |
| 75.2  | 1074.85 |
| 75.21 | 1213.55 |
| 75.22 | 1126.86 |
| 75.23 | 1300.23 |
| 75.24 | 1213.55 |
| 75.25 | 1092.19 |
| 75.26 | 1109.53 |
| 75.27 | 1282.89 |
| 75.28 | 1248.22 |
| 75.29 | 1022.85 |
| 75.3  | 1265.56 |
| 75.31 | 1369.57 |
| 75.32 | 1178.87 |
| 75.33 | 970.837 |
| 75.34 | 1109.53 |
| 75.35 | 1057.52 |
| 75.36 | 1178.87 |
| 75.37 | 1040.18 |
| 75.38 | 1005.51 |
| 75.39 | 1144.2  |
| 75.4  | 1092.19 |
| 75.41 | 1005.51 |
| 75.42 | 1022.85 |
| 75.43 | 1196.21 |

|       |         |
|-------|---------|
| 75.44 | 1092.19 |
| 75.45 | 1092.19 |
| 75.46 | 1230.88 |
| 75.47 | 1126.86 |
| 75.48 | 1230.88 |
| 75.49 | 1040.18 |
| 75.5  | 1282.89 |
| 75.51 | 1109.53 |
| 75.52 | 1022.85 |
| 75.53 | 884.155 |
| 75.54 | 884.155 |
| 75.55 | 936.164 |
| 75.56 | 1178.87 |
| 75.57 | 1040.18 |
| 75.58 | 1161.54 |
| 75.59 | 1126.86 |
| 75.6  | 1022.85 |
| 75.61 | 1109.53 |
| 75.62 | 1248.22 |
| 75.63 | 1144.2  |
| 75.64 | 901.491 |
| 75.65 | 1144.2  |
| 75.66 | 1421.58 |
| 75.67 | 1282.89 |
| 75.68 | 1473.59 |
| 75.69 | 1092.19 |
| 75.7  | 1005.51 |
| 75.71 | 1300.23 |
| 75.72 | 1334.9  |
| 75.73 | 1334.9  |
| 75.74 | 1213.55 |
| 75.75 | 1438.92 |
| 75.76 | 1040.18 |
| 75.77 | 1144.2  |
| 75.78 | 1317.56 |
| 75.79 | 1178.87 |
| 75.8  | 1282.89 |
| 75.81 | 953.5   |
| 75.82 | 901.491 |
| 75.83 | 1213.55 |
| 75.84 | 1230.88 |
| 75.85 | 1386.91 |
| 75.86 | 1213.55 |
| 75.87 | 1109.53 |



|       |         |
|-------|---------|
| 75.88 | 1092.19 |
| 75.89 | 1265.56 |
| 75.9  | 1248.22 |
| 75.91 | 1074.85 |
| 75.92 | 1178.87 |
| 75.93 | 1317.56 |
| 75.94 | 936.164 |
| 75.95 | 1057.52 |
| 75.96 | 1126.86 |
| 75.97 | 1022.85 |
| 75.98 | 1282.89 |
| 75.99 | 1057.52 |
| 76    | 1265.56 |
| 76.01 | 1300.23 |
| 76.02 | 1178.87 |
| 76.03 | 1126.86 |
| 76.04 | 849.482 |
| 76.05 | 953.5   |
| 76.06 | 1161.54 |
| 76.07 | 1265.56 |
| 76.08 | 1213.55 |
| 76.09 | 1230.88 |
| 76.1  | 1178.87 |
| 76.11 | 1161.54 |
| 76.12 | 1144.2  |
| 76.13 | 1074.85 |
| 76.14 | 1369.57 |
| 76.15 | 1057.52 |
| 76.16 | 1334.9  |
| 76.17 | 1300.23 |
| 76.18 | 1560.27 |
| 76.19 | 1248.22 |
| 76.2  | 1317.56 |
| 76.21 | 1213.55 |
| 76.22 | 1577.61 |
| 76.23 | 1438.92 |
| 76.24 | 1369.57 |
| 76.25 | 1386.91 |
| 76.26 | 1369.57 |
| 76.27 | 1560.27 |
| 76.28 | 1144.2  |
| 76.29 | 1265.56 |
| 76.3  | 1560.27 |
| 76.31 | 1490.93 |

|       |         |
|-------|---------|
| 76.32 | 1802.98 |
| 76.33 | 1889.66 |
| 76.34 | 1907    |
| 76.35 | 2167.05 |
| 76.36 | 1785.65 |
| 76.37 | 2184.38 |
| 76.38 | 2409.76 |
| 76.39 | 1802.98 |
| 76.4  | 2045.69 |
| 76.41 | 1976.35 |
| 76.42 | 1924.34 |
| 76.43 | 1959.01 |
| 76.44 | 1993.68 |
| 76.45 | 1959.01 |
| 76.46 | 1716.3  |
| 76.47 | 1854.99 |
| 76.48 | 1733.64 |
| 76.49 | 2063.03 |
| 76.5  | 2080.36 |
| 76.51 | 1802.98 |
| 76.52 | 1508.26 |
| 76.53 | 1386.91 |
| 76.54 | 1646.96 |
| 76.55 | 1820.32 |
| 76.56 | 1594.95 |
| 76.57 | 1854.99 |
| 76.58 | 1716.3  |
| 76.59 | 1924.34 |
| 76.6  | 1785.65 |
| 76.61 | 1646.96 |
| 76.62 | 1802.98 |
| 76.63 | 1959.01 |
| 76.64 | 1525.6  |
| 76.65 | 1560.27 |
| 76.66 | 1594.95 |
| 76.67 | 1577.61 |
| 76.68 | 1525.6  |
| 76.69 | 1785.65 |
| 76.7  | 1594.95 |
| 76.71 | 1646.96 |
| 76.72 | 1456.26 |
| 76.73 | 1542.94 |
| 76.74 | 1334.9  |
| 76.75 | 1490.93 |

|       |         |
|-------|---------|
| 76.76 | 1404.25 |
| 76.77 | 1456.26 |
| 76.78 | 1525.6  |
| 76.79 | 1542.94 |
| 76.8  | 1456.26 |
| 76.81 | 1473.59 |
| 76.82 | 1750.97 |
| 76.83 | 1612.28 |
| 76.84 | 1594.95 |
| 76.85 | 1352.24 |
| 76.86 | 1560.27 |
| 76.87 | 1386.91 |
| 76.88 | 1317.56 |
| 76.89 | 1646.96 |
| 76.9  | 1490.93 |
| 76.91 | 1334.9  |
| 76.92 | 1802.98 |
| 76.93 | 1386.91 |
| 76.94 | 1560.27 |
| 76.95 | 1404.25 |
| 76.96 | 1525.6  |
| 76.97 | 1577.61 |
| 76.98 | 1664.29 |
| 76.99 | 1456.26 |
| 77    | 1612.28 |
| 77.01 | 1594.95 |
| 77.02 | 1525.6  |
| 77.03 | 1802.98 |
| 77.04 | 1594.95 |
| 77.05 | 1854.99 |
| 77.06 | 1681.63 |
| 77.07 | 1976.35 |
| 77.08 | 1993.68 |
| 77.09 | 1768.31 |
| 77.1  | 1802.98 |
| 77.11 | 1750.97 |
| 77.12 | 2115.04 |
| 77.13 | 2288.4  |
| 77.14 | 2132.37 |
| 77.15 | 2461.76 |
| 77.16 | 2409.76 |
| 77.17 | 2375.08 |
| 77.18 | 2687.14 |
| 77.19 | 2444.43 |

|       |         |
|-------|---------|
| 77.2  | 2427.09 |
| 77.21 | 2565.78 |
| 77.22 | 2704.47 |
| 77.23 | 2687.14 |
| 77.24 | 2721.81 |
| 77.25 | 2773.82 |
| 77.26 | 2721.81 |
| 77.27 | 3276.57 |
| 77.28 | 2825.83 |
| 77.29 | 2635.13 |
| 77.3  | 2652.46 |
| 77.31 | 2496.44 |
| 77.32 | 2288.4  |
| 77.33 | 2409.76 |
| 77.34 | 2964.52 |
| 77.35 | 2999.19 |
| 77.36 | 2305.74 |
| 77.37 | 2548.45 |
| 77.38 | 2409.76 |
| 77.39 | 2115.04 |
| 77.4  | 1993.68 |
| 77.41 | 2115.04 |
| 77.42 | 2115.04 |
| 77.43 | 2288.4  |
| 77.44 | 2375.08 |
| 77.45 | 2219.06 |
| 77.46 | 2323.07 |
| 77.47 | 2288.4  |
| 77.48 | 1993.68 |
| 77.49 | 2080.36 |
| 77.5  | 1959.01 |
| 77.51 | 2253.73 |
| 77.52 | 2219.06 |
| 77.53 | 2011.02 |
| 77.54 | 1976.35 |
| 77.55 | 2045.69 |
| 77.56 | 1907    |
| 77.57 | 1768.31 |
| 77.58 | 1785.65 |
| 77.59 | 1872.33 |
| 77.6  | 1560.27 |
| 77.61 | 1698.96 |
| 77.62 | 1768.31 |
| 77.63 | 1837.66 |

|       |         |
|-------|---------|
| 77.64 | 1802.98 |
| 77.65 | 1456.26 |
| 77.66 | 1508.26 |
| 77.67 | 1612.28 |
| 77.68 | 1508.26 |
| 77.69 | 1733.64 |
| 77.7  | 1525.6  |
| 77.71 | 1386.91 |
| 77.72 | 1196.21 |
| 77.73 | 1698.96 |
| 77.74 | 1404.25 |
| 77.75 | 1317.56 |
| 77.76 | 1456.26 |
| 77.77 | 1352.24 |
| 77.78 | 1646.96 |
| 77.79 | 1265.56 |
| 77.8  | 1057.52 |
| 77.81 | 1213.55 |
| 77.82 | 1542.94 |
| 77.83 | 1421.58 |
| 77.84 | 1352.24 |
| 77.85 | 1386.91 |
| 77.86 | 1161.54 |
| 77.87 | 1057.52 |
| 77.88 | 1161.54 |
| 77.89 | 1248.22 |
| 77.9  | 1265.56 |
| 77.91 | 1334.9  |
| 77.92 | 1161.54 |
| 77.93 | 1317.56 |
| 77.94 | 1282.89 |
| 77.95 | 1144.2  |
| 77.96 | 1334.9  |
| 77.97 | 1248.22 |
| 77.98 | 1282.89 |
| 77.99 | 1248.22 |
| 78    | 1317.56 |
| 78.01 | 1109.53 |
| 78.02 | 1230.88 |
| 78.03 | 1213.55 |
| 78.04 | 1092.19 |
| 78.05 | 1317.56 |
| 78.06 | 1005.51 |
| 78.07 | 1213.55 |

|       |         |
|-------|---------|
| 78.08 | 1126.86 |
| 78.09 | 1230.88 |
| 78.1  | 1369.57 |
| 78.11 | 1213.55 |
| 78.12 | 1196.21 |
| 78.13 | 1230.88 |
| 78.14 | 1352.24 |
| 78.15 | 1404.25 |
| 78.16 | 1022.85 |
| 78.17 | 901.491 |
| 78.18 | 1092.19 |
| 78.19 | 1352.24 |
| 78.2  | 1421.58 |
| 78.21 | 1057.52 |
| 78.22 | 1005.51 |
| 78.23 | 1196.21 |
| 78.24 | 970.837 |
| 78.25 | 1109.53 |
| 78.26 | 1092.19 |
| 78.27 | 1230.88 |
| 78.28 | 1126.86 |
| 78.29 | 1352.24 |
| 78.3  | 1542.94 |
| 78.31 | 1230.88 |
| 78.32 | 1230.88 |
| 78.33 | 1282.89 |
| 78.34 | 1178.87 |
| 78.35 | 1092.19 |
| 78.36 | 1161.54 |
| 78.37 | 1022.85 |
| 78.38 | 1178.87 |
| 78.39 | 1369.57 |
| 78.4  | 1109.53 |
| 78.41 | 1144.2  |
| 78.42 | 1057.52 |
| 78.43 | 1074.85 |
| 78.44 | 1196.21 |
| 78.45 | 1126.86 |
| 78.46 | 1265.56 |
| 78.47 | 1213.55 |
| 78.48 | 1265.56 |
| 78.49 | 970.837 |
| 78.5  | 1161.54 |
| 78.51 | 1005.51 |

|       |         |
|-------|---------|
| 78.52 | 1109.53 |
| 78.53 | 936.164 |
| 78.54 | 1161.54 |
| 78.55 | 1178.87 |
| 78.56 | 1265.56 |
| 78.57 | 1109.53 |
| 78.58 | 1265.56 |
| 78.59 | 1057.52 |
| 78.6  | 1300.23 |
| 78.61 | 1196.21 |
| 78.62 | 832.146 |
| 78.63 | 1300.23 |
| 78.64 | 1109.53 |
| 78.65 | 1057.52 |
| 78.66 | 1126.86 |
| 78.67 | 1282.89 |
| 78.68 | 1144.2  |
| 78.69 | 1161.54 |
| 78.7  | 1074.85 |
| 78.71 | 1022.85 |
| 78.72 | 1248.22 |
| 78.73 | 1074.85 |
| 78.74 | 988.173 |
| 78.75 | 884.155 |
| 78.76 | 1161.54 |
| 78.77 | 1005.51 |
| 78.78 | 988.173 |
| 78.79 | 1022.85 |
| 78.8  | 1005.51 |
| 78.81 | 1317.56 |
| 78.82 | 1074.85 |
| 78.83 | 1213.55 |
| 78.84 | 1126.86 |
| 78.85 | 1057.52 |
| 78.86 | 1178.87 |
| 78.87 | 1300.23 |
| 78.88 | 1144.2  |
| 78.89 | 1126.86 |
| 78.9  | 953.5   |
| 78.91 | 1022.85 |
| 78.92 | 1022.85 |
| 78.93 | 953.5   |
| 78.94 | 1178.87 |
| 78.95 | 1213.55 |

|       |         |
|-------|---------|
| 78.96 | 1092.19 |
| 78.97 | 1144.2  |
| 78.98 | 1109.53 |
| 78.99 | 1109.53 |
| 79    | 1196.21 |
| 79.01 | 1022.85 |
| 79.02 | 1161.54 |
| 79.03 | 1265.56 |
| 79.04 | 1057.52 |
| 79.05 | 1196.21 |
| 79.06 | 1040.18 |
| 79.07 | 1144.2  |
| 79.08 | 1178.87 |
| 79.09 | 1022.85 |
| 79.1  | 1005.51 |
| 79.11 | 1057.52 |
| 79.12 | 1369.57 |
| 79.13 | 1196.21 |
| 79.14 | 1022.85 |
| 79.15 | 1161.54 |
| 79.16 | 1074.85 |
| 79.17 | 1161.54 |
| 79.18 | 918.828 |
| 79.19 | 1074.85 |
| 79.2  | 1248.22 |
| 79.21 | 1126.86 |
| 79.22 | 1144.2  |
| 79.23 | 1057.52 |
| 79.24 | 1057.52 |
| 79.25 | 1109.53 |
| 79.26 | 1109.53 |
| 79.27 | 1074.85 |
| 79.28 | 1057.52 |
| 79.29 | 988.173 |
| 79.3  | 832.146 |
| 79.31 | 1040.18 |
| 79.32 | 901.491 |
| 79.33 | 918.828 |
| 79.34 | 953.5   |
| 79.35 | 936.164 |
| 79.36 | 1144.2  |
| 79.37 | 1109.53 |
| 79.38 | 1109.53 |
| 79.39 | 936.164 |



|       |         |
|-------|---------|
| 79.4  | 866.819 |
| 79.41 | 1196.21 |
| 79.42 | 1386.91 |
| 79.43 | 988.173 |
| 79.44 | 1092.19 |
| 79.45 | 1109.53 |
| 79.46 | 1230.88 |
| 79.47 | 1265.56 |
| 79.48 | 953.5   |
| 79.49 | 1109.53 |
| 79.5  | 762.8   |
| 79.51 | 1057.52 |
| 79.52 | 936.164 |
| 79.53 | 1196.21 |
| 79.54 | 1144.2  |
| 79.55 | 1022.85 |
| 79.56 | 1144.2  |
| 79.57 | 1040.18 |
| 79.58 | 1248.22 |
| 79.59 | 1317.56 |
| 79.6  | 1022.85 |
| 79.61 | 1369.57 |
| 79.62 | 1005.51 |
| 79.63 | 918.828 |
| 79.64 | 1057.52 |
| 79.65 | 1161.54 |
| 79.66 | 1040.18 |
| 79.67 | 953.5   |
| 79.68 | 936.164 |
| 79.69 | 1213.55 |
| 79.7  | 1178.87 |
| 79.71 | 1178.87 |
| 79.72 | 1126.86 |
| 79.73 | 1196.21 |
| 79.74 | 1074.85 |
| 79.75 | 1022.85 |
| 79.76 | 953.5   |
| 79.77 | 1109.53 |
| 79.78 | 1213.55 |
| 79.79 | 1196.21 |
| 79.8  | 1126.86 |
| 79.81 | 1248.22 |
| 79.82 | 866.819 |
| 79.83 | 918.828 |

|       |         |
|-------|---------|
| 79.84 | 1074.85 |
| 79.85 | 1092.19 |
| 79.86 | 1109.53 |
| 79.87 | 1109.53 |
| 79.88 | 884.155 |
| 79.89 | 1213.55 |
| 79.9  | 1282.89 |
| 79.91 | 1074.85 |
| 79.92 | 1230.88 |
| 79.93 | 1022.85 |
| 79.94 | 1300.23 |
| 79.95 | 1230.88 |
| 79.96 | 1282.89 |
| 79.97 | 1213.55 |
| 79.98 | 1213.55 |
| 79.99 | 1282.89 |
| 80    | 1230.88 |
| 80.01 | 1074.85 |
| 80.02 | 918.828 |
| 80.03 | 1040.18 |
| 80.04 | 1092.19 |
| 80.05 | 1300.23 |
| 80.06 | 1040.18 |
| 80.07 | 970.837 |
| 80.08 | 1369.57 |
| 80.09 | 1126.86 |
| 80.1  | 1161.54 |
| 80.11 | 1074.85 |
| 80.12 | 1109.53 |
| 80.13 | 1126.86 |
| 80.14 | 1144.2  |
| 80.15 | 1109.53 |
| 80.16 | 1074.85 |
| 80.17 | 970.837 |
| 80.18 | 1144.2  |
| 80.19 | 936.164 |
| 80.2  | 1334.9  |
| 80.21 | 988.173 |
| 80.22 | 1369.57 |
| 80.23 | 1144.2  |
| 80.24 | 936.164 |
| 80.25 | 1144.2  |
| 80.26 | 1126.86 |
| 80.27 | 1265.56 |

|       |         |
|-------|---------|
| 80.28 | 1126.86 |
| 80.29 | 1057.52 |
| 80.3  | 1230.88 |
| 80.31 | 1057.52 |
| 80.32 | 1300.23 |
| 80.33 | 1161.54 |
| 80.34 | 1144.2  |
| 80.35 | 1508.26 |
| 80.36 | 1230.88 |
| 80.37 | 1473.59 |
| 80.38 | 1196.21 |
| 80.39 | 1161.54 |
| 80.4  | 1057.52 |
| 80.41 | 1109.53 |
| 80.42 | 1109.53 |
| 80.43 | 1057.52 |
| 80.44 | 1005.51 |
| 80.45 | 1144.2  |
| 80.46 | 1022.85 |
| 80.47 | 1057.52 |
| 80.48 | 1178.87 |
| 80.49 | 1126.86 |
| 80.5  | 1005.51 |
| 80.51 | 1178.87 |
| 80.52 | 1282.89 |
| 80.53 | 1074.85 |
| 80.54 | 866.819 |
| 80.55 | 1126.86 |
| 80.56 | 1248.22 |
| 80.57 | 1092.19 |
| 80.58 | 988.173 |
| 80.59 | 918.828 |
| 80.6  | 1109.53 |
| 80.61 | 1282.89 |
| 80.62 | 1178.87 |
| 80.63 | 1213.55 |
| 80.64 | 1265.56 |
| 80.65 | 1126.86 |
| 80.66 | 1022.85 |
| 80.67 | 918.828 |
| 80.68 | 901.491 |
| 80.69 | 1282.89 |
| 80.7  | 1196.21 |
| 80.71 | 918.828 |

|       |         |
|-------|---------|
| 80.72 | 1005.51 |
| 80.73 | 1386.91 |
| 80.74 | 1144.2  |
| 80.75 | 1092.19 |
| 80.76 | 1300.23 |
| 80.77 | 1074.85 |
| 80.78 | 1161.54 |
| 80.79 | 1161.54 |
| 80.8  | 1213.55 |
| 80.81 | 1265.56 |
| 80.82 | 1092.19 |
| 80.83 | 1213.55 |
| 80.84 | 1265.56 |
| 80.85 | 1074.85 |
| 80.86 | 1265.56 |
| 80.87 | 1144.2  |
| 80.88 | 1196.21 |
| 80.89 | 1178.87 |
| 80.9  | 1369.57 |
| 80.91 | 1092.19 |
| 80.92 | 1022.85 |
| 80.93 | 1421.58 |
| 80.94 | 1421.58 |
| 80.95 | 1352.24 |
| 80.96 | 1178.87 |
| 80.97 | 1386.91 |
| 80.98 | 1352.24 |
| 80.99 | 1386.91 |
| 81    | 1334.9  |
| 81.01 | 1473.59 |
| 81.02 | 1490.93 |
| 81.03 | 1646.96 |
| 81.04 | 1473.59 |
| 81.05 | 1386.91 |
| 81.06 | 1317.56 |
| 81.07 | 1646.96 |
| 81.08 | 1681.63 |
| 81.09 | 1525.6  |
| 81.1  | 1560.27 |
| 81.11 | 1560.27 |
| 81.12 | 1542.94 |
| 81.13 | 1404.25 |
| 81.14 | 1265.56 |
| 81.15 | 1334.9  |

|       |         |
|-------|---------|
| 81.16 | 1282.89 |
| 81.17 | 1629.62 |
| 81.18 | 1577.61 |
| 81.19 | 1161.54 |
| 81.2  | 1334.9  |
| 81.21 | 1594.95 |
| 81.22 | 1525.6  |
| 81.23 | 1577.61 |
| 81.24 | 1473.59 |
| 81.25 | 1473.59 |
| 81.26 | 1473.59 |
| 81.27 | 1490.93 |
| 81.28 | 1404.25 |
| 81.29 | 1473.59 |
| 81.3  | 1664.29 |
| 81.31 | 1733.64 |
| 81.32 | 1594.95 |
| 81.33 | 1872.33 |
| 81.34 | 1404.25 |
| 81.35 | 1560.27 |
| 81.36 | 1490.93 |
| 81.37 | 1334.9  |
| 81.38 | 1664.29 |
| 81.39 | 1802.98 |
| 81.4  | 1716.3  |
| 81.41 | 1768.31 |
| 81.42 | 2028.36 |
| 81.43 | 1577.61 |
| 81.44 | 1976.35 |
| 81.45 | 2028.36 |
| 81.46 | 1681.63 |
| 81.47 | 1698.96 |
| 81.48 | 1993.68 |
| 81.49 | 2461.76 |
| 81.5  | 2115.04 |
| 81.51 | 2097.7  |
| 81.52 | 2357.75 |
| 81.53 | 1993.68 |
| 81.54 | 2479.1  |
| 81.55 | 2531.11 |
| 81.56 | 2461.76 |
| 81.57 | 2617.79 |
| 81.58 | 2687.14 |
| 81.59 | 2669.8  |

|       |         |
|-------|---------|
| 81.6  | 3016.53 |
| 81.61 | 2964.52 |
| 81.62 | 3016.53 |
| 81.63 | 3207.23 |
| 81.64 | 2773.82 |
| 81.65 | 2791.16 |
| 81.66 | 2739.15 |
| 81.67 | 2756.48 |
| 81.68 | 2548.45 |
| 81.69 | 2531.11 |
| 81.7  | 2357.75 |
| 81.71 | 2513.77 |
| 81.72 | 2565.78 |
| 81.73 | 2427.09 |
| 81.74 | 2253.73 |
| 81.75 | 2392.42 |
| 81.76 | 2635.13 |
| 81.77 | 2080.36 |
| 81.78 | 2184.38 |
| 81.79 | 2305.74 |
| 81.8  | 2392.42 |
| 81.81 | 2392.42 |
| 81.82 | 1959.01 |
| 81.83 | 2479.1  |
| 81.84 | 2721.81 |
| 81.85 | 2409.76 |
| 81.86 | 2132.37 |
| 81.87 | 2045.69 |
| 81.88 | 2097.7  |
| 81.89 | 2565.78 |
| 81.9  | 2045.69 |
| 81.91 | 2011.02 |
| 81.92 | 1733.64 |
| 81.93 | 1959.01 |
| 81.94 | 1785.65 |
| 81.95 | 2357.75 |
| 81.96 | 2097.7  |
| 81.97 | 1837.66 |
| 81.98 | 1976.35 |
| 81.99 | 1959.01 |
| 82    | 2080.36 |
| 82.01 | 1924.34 |
| 82.02 | 1750.97 |
| 82.03 | 2236.39 |

|       |         |
|-------|---------|
| 82.04 | 1802.98 |
| 82.05 | 1438.92 |
| 82.06 | 1733.64 |
| 82.07 | 1802.98 |
| 82.08 | 1698.96 |
| 82.09 | 1802.98 |
| 82.1  | 1681.63 |
| 82.11 | 1508.26 |
| 82.12 | 1664.29 |
| 82.13 | 1681.63 |
| 82.14 | 1750.97 |
| 82.15 | 1837.66 |
| 82.16 | 1473.59 |
| 82.17 | 1144.2  |
| 82.18 | 1577.61 |
| 82.19 | 1456.26 |
| 82.2  | 1612.28 |
| 82.21 | 1802.98 |
| 82.22 | 1664.29 |
| 82.23 | 1716.3  |
| 82.24 | 1820.32 |
| 82.25 | 1872.33 |
| 82.26 | 1456.26 |
| 82.27 | 1716.3  |
| 82.28 | 1716.3  |
| 82.29 | 1577.61 |
| 82.3  | 1612.28 |
| 82.31 | 1386.91 |
| 82.32 | 1612.28 |
| 82.33 | 1577.61 |
| 82.34 | 1317.56 |
| 82.35 | 1386.91 |
| 82.36 | 1473.59 |
| 82.37 | 1317.56 |
| 82.38 | 1265.56 |
| 82.39 | 1404.25 |
| 82.4  | 1369.57 |
| 82.41 | 1230.88 |
| 82.42 | 1421.58 |
| 82.43 | 1230.88 |
| 82.44 | 1178.87 |
| 82.45 | 1109.53 |
| 82.46 | 1386.91 |
| 82.47 | 1473.59 |

|       |         |
|-------|---------|
| 82.48 | 1386.91 |
| 82.49 | 1369.57 |
| 82.5  | 1265.56 |
| 82.51 | 1334.9  |
| 82.52 | 1213.55 |
| 82.53 | 1386.91 |
| 82.54 | 1282.89 |
| 82.55 | 1594.95 |
| 82.56 | 1456.26 |
| 82.57 | 1092.19 |
| 82.58 | 1248.22 |
| 82.59 | 1508.26 |
| 82.6  | 1369.57 |
| 82.61 | 1196.21 |
| 82.62 | 1109.53 |
| 82.63 | 1300.23 |
| 82.64 | 936.164 |
| 82.65 | 1109.53 |
| 82.66 | 1334.9  |
| 82.67 | 1178.87 |
| 82.68 | 1248.22 |
| 82.69 | 1074.85 |
| 82.7  | 1074.85 |
| 82.71 | 1265.56 |
| 82.72 | 1282.89 |
| 82.73 | 1109.53 |
| 82.74 | 1161.54 |
| 82.75 | 970.837 |
| 82.76 | 1178.87 |
| 82.77 | 1144.2  |
| 82.78 | 1126.86 |
| 82.79 | 1213.55 |
| 82.8  | 1282.89 |
| 82.81 | 1334.9  |
| 82.82 | 1265.56 |
| 82.83 | 1005.51 |
| 82.84 | 1005.51 |
| 82.85 | 1109.53 |
| 82.86 | 1282.89 |
| 82.87 | 1126.86 |
| 82.88 | 970.837 |
| 82.89 | 1265.56 |
| 82.9  | 1300.23 |
| 82.91 | 901.491 |



|       |         |
|-------|---------|
| 82.92 | 1022.85 |
| 82.93 | 936.164 |
| 82.94 | 953.5   |
| 82.95 | 1092.19 |
| 82.96 | 1126.86 |
| 82.97 | 884.155 |
| 82.98 | 1196.21 |
| 82.99 | 970.837 |
| 83    | 1230.88 |
| 83.01 | 1421.58 |
| 83.02 | 1213.55 |
| 83.03 | 1005.51 |
| 83.04 | 1248.22 |
| 83.05 | 1126.86 |
| 83.06 | 1213.55 |
| 83.07 | 936.164 |
| 83.08 | 1057.52 |
| 83.09 | 1178.87 |
| 83.1  | 1074.85 |
| 83.11 | 1040.18 |
| 83.12 | 1161.54 |
| 83.13 | 849.482 |
| 83.14 | 1074.85 |
| 83.15 | 1265.56 |
| 83.16 | 1144.2  |
| 83.17 | 1178.87 |
| 83.18 | 1074.85 |
| 83.19 | 1196.21 |
| 83.2  | 1369.57 |
| 83.21 | 1213.55 |
| 83.22 | 1040.18 |
| 83.23 | 1144.2  |
| 83.24 | 1109.53 |
| 83.25 | 1178.87 |
| 83.26 | 1300.23 |
| 83.27 | 1213.55 |
| 83.28 | 1126.86 |
| 83.29 | 1178.87 |
| 83.3  | 1282.89 |
| 83.31 | 1144.2  |
| 83.32 | 970.837 |
| 83.33 | 1196.21 |
| 83.34 | 1282.89 |
| 83.35 | 1282.89 |

|       |         |
|-------|---------|
| 83.36 | 970.837 |
| 83.37 | 1178.87 |
| 83.38 | 1282.89 |
| 83.39 | 1144.2  |
| 83.4  | 1144.2  |
| 83.41 | 1404.25 |
| 83.42 | 1282.89 |
| 83.43 | 1196.21 |
| 83.44 | 1404.25 |
| 83.45 | 1144.2  |
| 83.46 | 1109.53 |
| 83.47 | 1352.24 |
| 83.48 | 1421.58 |
| 83.49 | 1386.91 |
| 83.5  | 1040.18 |
| 83.51 | 1334.9  |
| 83.52 | 970.837 |
| 83.53 | 1334.9  |
| 83.54 | 1473.59 |
| 83.55 | 1196.21 |
| 83.56 | 1352.24 |
| 83.57 | 1386.91 |
| 83.58 | 1352.24 |
| 83.59 | 1560.27 |
| 83.6  | 1768.31 |
| 83.61 | 1594.95 |
| 83.62 | 1456.26 |
| 83.63 | 1525.6  |
| 83.64 | 1629.62 |
| 83.65 | 1456.26 |
| 83.66 | 1802.98 |
| 83.67 | 1768.31 |
| 83.68 | 1889.66 |
| 83.69 | 1750.97 |
| 83.7  | 2028.36 |
| 83.71 | 1976.35 |
| 83.72 | 2080.36 |
| 83.73 | 2635.13 |
| 83.74 | 1941.67 |
| 83.75 | 2115.04 |
| 83.76 | 2236.39 |
| 83.77 | 2617.79 |
| 83.78 | 3103.21 |
| 83.79 | 2895.17 |

|       |         |
|-------|---------|
| 83.8  | 2704.47 |
| 83.81 | 3085.87 |
| 83.82 | 3172.56 |
| 83.83 | 3311.25 |
| 83.84 | 3120.55 |
| 83.85 | 3449.94 |
| 83.86 | 3571.29 |
| 83.87 | 3588.63 |
| 83.88 | 3970.03 |
| 83.89 | 3657.97 |
| 83.9  | 3519.28 |
| 83.91 | 3727.32 |
| 83.92 | 3657.97 |
| 83.93 | 3467.27 |
| 83.94 | 3085.87 |
| 83.95 | 2964.52 |
| 83.96 | 2929.85 |
| 83.97 | 3415.26 |
| 83.98 | 2981.86 |
| 83.99 | 3207.23 |
| 84    | 2999.19 |
| 84.01 | 2635.13 |
| 84.02 | 3068.54 |
| 84.03 | 3345.92 |
| 84.04 | 2947.18 |
| 84.05 | 3172.56 |
| 84.06 | 2791.16 |
| 84.07 | 2739.15 |
| 84.08 | 2877.84 |
| 84.09 | 3033.86 |
| 84.1  | 2617.79 |
| 84.11 | 2860.5  |
| 84.12 | 2860.5  |
| 84.13 | 2739.15 |
| 84.14 | 2912.51 |
| 84.15 | 2583.12 |
| 84.16 | 2825.83 |
| 84.17 | 3103.21 |
| 84.18 | 2496.44 |
| 84.19 | 2496.44 |
| 84.2  | 2565.78 |
| 84.21 | 2479.1  |
| 84.22 | 2496.44 |
| 84.23 | 2357.75 |

|       |         |
|-------|---------|
| 84.24 | 2392.42 |
| 84.25 | 2427.09 |
| 84.26 | 2115.04 |
| 84.27 | 1907    |
| 84.28 | 2045.69 |
| 84.29 | 1768.31 |
| 84.3  | 1872.33 |
| 84.31 | 1924.34 |
| 84.32 | 1837.66 |
| 84.33 | 1907    |
| 84.34 | 1872.33 |
| 84.35 | 1924.34 |
| 84.36 | 1993.68 |
| 84.37 | 1750.97 |
| 84.38 | 1924.34 |
| 84.39 | 1802.98 |
| 84.4  | 1820.32 |
| 84.41 | 1716.3  |
| 84.42 | 1733.64 |
| 84.43 | 1560.27 |
| 84.44 | 1352.24 |
| 84.45 | 1698.96 |
| 84.46 | 1490.93 |
| 84.47 | 1317.56 |
| 84.48 | 1560.27 |
| 84.49 | 1334.9  |
| 84.5  | 1317.56 |
| 84.51 | 1438.92 |
| 84.52 | 1456.26 |
| 84.53 | 1334.9  |
| 84.54 | 1196.21 |
| 84.55 | 1525.6  |
| 84.56 | 1352.24 |
| 84.57 | 1196.21 |
| 84.58 | 1404.25 |
| 84.59 | 1352.24 |
| 84.6  | 1352.24 |
| 84.61 | 1438.92 |
| 84.62 | 1213.55 |
| 84.63 | 1404.25 |
| 84.64 | 1248.22 |
| 84.65 | 1282.89 |
| 84.66 | 1456.26 |
| 84.67 | 1438.92 |

|       |         |
|-------|---------|
| 84.68 | 1282.89 |
| 84.69 | 1473.59 |
| 84.7  | 1404.25 |
| 84.71 | 1854.99 |
| 84.72 | 1369.57 |
| 84.73 | 1560.27 |
| 84.74 | 1577.61 |
| 84.75 | 1421.58 |
| 84.76 | 1802.98 |
| 84.77 | 1577.61 |
| 84.78 | 1768.31 |
| 84.79 | 1733.64 |
| 84.8  | 1907    |
| 84.81 | 1681.63 |
| 84.82 | 2097.7  |
| 84.83 | 1716.3  |
| 84.84 | 1872.33 |
| 84.85 | 2011.02 |
| 84.86 | 1941.67 |
| 84.87 | 1924.34 |
| 84.88 | 2253.73 |
| 84.89 | 2253.73 |
| 84.9  | 2132.37 |
| 84.91 | 2427.09 |
| 84.92 | 2201.72 |
| 84.93 | 2600.46 |
| 84.94 | 2444.43 |
| 84.95 | 2513.77 |
| 84.96 | 2444.43 |
| 84.97 | 1889.66 |
| 84.98 | 2479.1  |
| 84.99 | 2167.05 |
| 85    | 1993.68 |
| 85.01 | 1854.99 |
| 85.02 | 1889.66 |
| 85.03 | 1941.67 |
| 85.04 | 2011.02 |
| 85.05 | 2115.04 |
| 85.06 | 2097.7  |
| 85.07 | 1959.01 |
| 85.08 | 1941.67 |
| 85.09 | 1785.65 |
| 85.1  | 2271.06 |
| 85.11 | 2011.02 |

|       |         |
|-------|---------|
| 85.12 | 1750.97 |
| 85.13 | 2097.7  |
| 85.14 | 2011.02 |
| 85.15 | 2132.37 |
| 85.16 | 1941.67 |
| 85.17 | 2028.36 |
| 85.18 | 2028.36 |
| 85.19 | 1785.65 |
| 85.2  | 1750.97 |
| 85.21 | 1560.27 |
| 85.22 | 1907    |
| 85.23 | 1941.67 |
| 85.24 | 1612.28 |
| 85.25 | 1681.63 |
| 85.26 | 1698.96 |
| 85.27 | 1837.66 |
| 85.28 | 1733.64 |
| 85.29 | 1698.96 |
| 85.3  | 1594.95 |
| 85.31 | 1490.93 |
| 85.32 | 1404.25 |
| 85.33 | 1369.57 |
| 85.34 | 1508.26 |
| 85.35 | 1404.25 |
| 85.36 | 1300.23 |
| 85.37 | 1646.96 |
| 85.38 | 1317.56 |
| 85.39 | 1282.89 |
| 85.4  | 1317.56 |
| 85.41 | 1421.58 |
| 85.42 | 1317.56 |
| 85.43 | 1334.9  |
| 85.44 | 1196.21 |
| 85.45 | 1282.89 |
| 85.46 | 1421.58 |
| 85.47 | 884.155 |
| 85.48 | 1074.85 |
| 85.49 | 1282.89 |
| 85.5  | 1161.54 |
| 85.51 | 1317.56 |
| 85.52 | 1092.19 |
| 85.53 | 1057.52 |
| 85.54 | 1161.54 |
| 85.55 | 1248.22 |

|       |         |
|-------|---------|
| 85.56 | 1317.56 |
| 85.57 | 1248.22 |
| 85.58 | 1144.2  |
| 85.59 | 1213.55 |
| 85.6  | 1022.85 |
| 85.61 | 1300.23 |
| 85.62 | 1161.54 |
| 85.63 | 1248.22 |
| 85.64 | 1282.89 |
| 85.65 | 1126.86 |
| 85.66 | 970.837 |
| 85.67 | 1230.88 |
| 85.68 | 1022.85 |
| 85.69 | 988.173 |
| 85.7  | 1161.54 |
| 85.71 | 1109.53 |
| 85.72 | 1126.86 |
| 85.73 | 1282.89 |
| 85.74 | 1144.2  |
| 85.75 | 918.828 |
| 85.76 | 918.828 |
| 85.77 | 832.146 |
| 85.78 | 1144.2  |
| 85.79 | 1109.53 |
| 85.8  | 936.164 |
| 85.81 | 1126.86 |
| 85.82 | 1040.18 |
| 85.83 | 1040.18 |
| 85.84 | 1109.53 |
| 85.85 | 1126.86 |
| 85.86 | 1126.86 |
| 85.87 | 1092.19 |
| 85.88 | 1248.22 |
| 85.89 | 1040.18 |
| 85.9  | 901.491 |
| 85.91 | 1178.87 |
| 85.92 | 1161.54 |
| 85.93 | 1040.18 |
| 85.94 | 832.146 |
| 85.95 | 1022.85 |
| 85.96 | 1352.24 |
| 85.97 | 1213.55 |
| 85.98 | 1022.85 |
| 85.99 | 1040.18 |

|       |         |
|-------|---------|
| 86    | 1109.53 |
| 86.01 | 1265.56 |
| 86.02 | 814.809 |
| 86.03 | 1057.52 |
| 86.04 | 1248.22 |
| 86.05 | 1074.85 |
| 86.06 | 1109.53 |
| 86.07 | 1005.51 |
| 86.08 | 1317.56 |
| 86.09 | 1022.85 |
| 86.1  | 953.5   |
| 86.11 | 1178.87 |
| 86.12 | 918.828 |
| 86.13 | 970.837 |
| 86.14 | 1126.86 |
| 86.15 | 901.491 |
| 86.16 | 918.828 |
| 86.17 | 1040.18 |
| 86.18 | 1213.55 |
| 86.19 | 1178.87 |
| 86.2  | 1144.2  |
| 86.21 | 1126.86 |
| 86.22 | 1092.19 |
| 86.23 | 953.5   |
| 86.24 | 1092.19 |
| 86.25 | 1282.89 |
| 86.26 | 1161.54 |
| 86.27 | 970.837 |
| 86.28 | 1161.54 |
| 86.29 | 901.491 |
| 86.3  | 1109.53 |
| 86.31 | 1213.55 |
| 86.32 | 1022.85 |
| 86.33 | 1178.87 |
| 86.34 | 970.837 |
| 86.35 | 832.146 |
| 86.36 | 1178.87 |
| 86.37 | 1057.52 |
| 86.38 | 953.5   |
| 86.39 | 1126.86 |
| 86.4  | 1178.87 |
| 86.41 | 1126.86 |
| 86.42 | 1040.18 |
| 86.43 | 1092.19 |



|       |         |
|-------|---------|
| 86.44 | 1334.9  |
| 86.45 | 1161.54 |
| 86.46 | 1126.86 |
| 86.47 | 1317.56 |
| 86.48 | 1456.26 |
| 86.49 | 1178.87 |
| 86.5  | 1282.89 |
| 86.51 | 1178.87 |
| 86.52 | 1317.56 |
| 86.53 | 1092.19 |
| 86.54 | 1092.19 |
| 86.55 | 1161.54 |
| 86.56 | 1057.52 |
| 86.57 | 1144.2  |
| 86.58 | 1057.52 |
| 86.59 | 1317.56 |
| 86.6  | 1456.26 |
| 86.61 | 1577.61 |
| 86.62 | 1300.23 |
| 86.63 | 1265.56 |
| 86.64 | 1213.55 |
| 86.65 | 1456.26 |
| 86.66 | 1508.26 |
| 86.67 | 1282.89 |
| 86.68 | 1334.9  |
| 86.69 | 1126.86 |
| 86.7  | 1126.86 |
| 86.71 | 1230.88 |
| 86.72 | 1109.53 |
| 86.73 | 1074.85 |
| 86.74 | 1109.53 |
| 86.75 | 1161.54 |
| 86.76 | 1352.24 |
| 86.77 | 1213.55 |
| 86.78 | 988.173 |
| 86.79 | 1109.53 |
| 86.8  | 953.5   |
| 86.81 | 1196.21 |
| 86.82 | 1178.87 |
| 86.83 | 1196.21 |
| 86.84 | 1178.87 |
| 86.85 | 1196.21 |
| 86.86 | 1109.53 |
| 86.87 | 1248.22 |

|       |         |
|-------|---------|
| 86.88 | 1196.21 |
| 86.89 | 1040.18 |
| 86.9  | 988.173 |
| 86.91 | 1057.52 |
| 86.92 | 1126.86 |
| 86.93 | 953.5   |
| 86.94 | 1005.51 |
| 86.95 | 1248.22 |
| 86.96 | 1161.54 |
| 86.97 | 1265.56 |
| 86.98 | 1230.88 |
| 86.99 | 1126.86 |
| 87    | 1161.54 |
| 87.01 | 884.155 |
| 87.02 | 797.473 |
| 87.03 | 1126.86 |
| 87.04 | 953.5   |
| 87.05 | 1005.51 |
| 87.06 | 1178.87 |
| 87.07 | 988.173 |
| 87.08 | 1126.86 |
| 87.09 | 1057.52 |
| 87.1  | 953.5   |
| 87.11 | 1057.52 |
| 87.12 | 1092.19 |
| 87.13 | 1334.9  |
| 87.14 | 936.164 |
| 87.15 | 936.164 |
| 87.16 | 918.828 |
| 87.17 | 970.837 |
| 87.18 | 918.828 |
| 87.19 | 1057.52 |
| 87.2  | 936.164 |
| 87.21 | 1005.51 |
| 87.22 | 988.173 |
| 87.23 | 1040.18 |
| 87.24 | 1040.18 |
| 87.25 | 1074.85 |
| 87.26 | 1057.52 |
| 87.27 | 866.819 |
| 87.28 | 988.173 |
| 87.29 | 1074.85 |
| 87.3  | 1144.2  |
| 87.31 | 953.5   |

|       |         |
|-------|---------|
| 87.32 | 849.482 |
| 87.33 | 970.837 |
| 87.34 | 866.819 |
| 87.35 | 866.819 |
| 87.36 | 866.819 |
| 87.37 | 1022.85 |
| 87.38 | 1196.21 |
| 87.39 | 1126.86 |
| 87.4  | 1022.85 |
| 87.41 | 1005.51 |
| 87.42 | 901.491 |
| 87.43 | 814.809 |
| 87.44 | 849.482 |
| 87.45 | 1178.87 |
| 87.46 | 918.828 |
| 87.47 | 866.819 |
| 87.48 | 1040.18 |
| 87.49 | 797.473 |
| 87.5  | 849.482 |
| 87.51 | 970.837 |
| 87.52 | 1144.2  |
| 87.53 | 745.464 |
| 87.54 | 988.173 |
| 87.55 | 1092.19 |
| 87.56 | 970.837 |
| 87.57 | 988.173 |
| 87.58 | 1022.85 |
| 87.59 | 1126.86 |
| 87.6  | 1040.18 |
| 87.61 | 1074.85 |
| 87.62 | 1005.51 |
| 87.63 | 918.828 |
| 87.64 | 1022.85 |
| 87.65 | 918.828 |
| 87.66 | 1040.18 |
| 87.67 | 936.164 |
| 87.68 | 1126.86 |
| 87.69 | 1109.53 |
| 87.7  | 1057.52 |
| 87.71 | 1161.54 |
| 87.72 | 1092.19 |
| 87.73 | 866.819 |
| 87.74 | 953.5   |
| 87.75 | 901.491 |

|       |         |
|-------|---------|
| 87.76 | 849.482 |
| 87.77 | 849.482 |
| 87.78 | 745.464 |
| 87.79 | 866.819 |
| 87.8  | 762.8   |
| 87.81 | 988.173 |
| 87.82 | 970.837 |
| 87.83 | 1230.88 |
| 87.84 | 710.791 |
| 87.85 | 849.482 |
| 87.86 | 970.837 |
| 87.87 | 988.173 |
| 87.88 | 936.164 |
| 87.89 | 814.809 |
| 87.9  | 832.146 |
| 87.91 | 1022.85 |
| 87.92 | 901.491 |
| 87.93 | 970.837 |
| 87.94 | 970.837 |
| 87.95 | 988.173 |
| 87.96 | 901.491 |
| 87.97 | 797.473 |
| 87.98 | 1040.18 |
| 87.99 | 1022.85 |
| 88    | 936.164 |
| 88.01 | 1057.52 |
| 88.02 | 901.491 |
| 88.03 | 849.482 |
| 88.04 | 936.164 |
| 88.05 | 849.482 |
| 88.06 | 1040.18 |
| 88.07 | 936.164 |
| 88.08 | 953.5   |
| 88.09 | 849.482 |
| 88.1  | 884.155 |
| 88.11 | 1092.19 |
| 88.12 | 780.137 |
| 88.13 | 901.491 |
| 88.14 | 1057.52 |
| 88.15 | 953.5   |
| 88.16 | 832.146 |
| 88.17 | 1005.51 |
| 88.18 | 814.809 |
| 88.19 | 901.491 |

|       |         |
|-------|---------|
| 88.2  | 745.464 |
| 88.21 | 884.155 |
| 88.22 | 728.128 |
| 88.23 | 1109.53 |
| 88.24 | 832.146 |
| 88.25 | 780.137 |
| 88.26 | 918.828 |
| 88.27 | 936.164 |
| 88.28 | 728.128 |
| 88.29 | 988.173 |
| 88.3  | 936.164 |
| 88.31 | 988.173 |
| 88.32 | 1074.85 |
| 88.33 | 814.809 |
| 88.34 | 936.164 |
| 88.35 | 1005.51 |
| 88.36 | 901.491 |
| 88.37 | 1126.86 |
| 88.38 | 918.828 |
| 88.39 | 988.173 |
| 88.4  | 918.828 |
| 88.41 | 884.155 |
| 88.42 | 1074.85 |
| 88.43 | 762.8   |
| 88.44 | 1057.52 |
| 88.45 | 936.164 |
| 88.46 | 832.146 |
| 88.47 | 1005.51 |
| 88.48 | 1161.54 |
| 88.49 | 1213.55 |
| 88.5  | 953.5   |
| 88.51 | 728.128 |
| 88.52 | 953.5   |
| 88.53 | 849.482 |
| 88.54 | 1005.51 |
| 88.55 | 901.491 |
| 88.56 | 832.146 |
| 88.57 | 1144.2  |
| 88.58 | 953.5   |
| 88.59 | 1005.51 |
| 88.6  | 1022.85 |
| 88.61 | 1074.85 |
| 88.62 | 676.118 |
| 88.63 | 814.809 |

|       |         |
|-------|---------|
| 88.64 | 832.146 |
| 88.65 | 728.128 |
| 88.66 | 988.173 |
| 88.67 | 884.155 |
| 88.68 | 762.8   |
| 88.69 | 884.155 |
| 88.7  | 797.473 |
| 88.71 | 1230.88 |
| 88.72 | 1057.52 |
| 88.73 | 762.8   |
| 88.74 | 936.164 |
| 88.75 | 936.164 |
| 88.76 | 762.8   |
| 88.77 | 1126.86 |
| 88.78 | 866.819 |
| 88.79 | 970.837 |
| 88.8  | 1040.18 |
| 88.81 | 866.819 |
| 88.82 | 901.491 |
| 88.83 | 849.482 |
| 88.84 | 728.128 |
| 88.85 | 970.837 |
| 88.86 | 780.137 |
| 88.87 | 849.482 |
| 88.88 | 814.809 |
| 88.89 | 936.164 |
| 88.9  | 970.837 |
| 88.91 | 1005.51 |
| 88.92 | 953.5   |
| 88.93 | 780.137 |
| 88.94 | 1074.85 |
| 88.95 | 832.146 |
| 88.96 | 884.155 |
| 88.97 | 814.809 |
| 88.98 | 936.164 |
| 88.99 | 814.809 |
| 89    | 866.819 |
| 89.01 | 970.837 |
| 89.02 | 1005.51 |
| 89.03 | 953.5   |
| 89.04 | 884.155 |
| 89.05 | 936.164 |
| 89.06 | 1005.51 |
| 89.07 | 936.164 |

|       |         |
|-------|---------|
| 89.08 | 884.155 |
| 89.09 | 1109.53 |
| 89.1  | 918.828 |
| 89.11 | 918.828 |
| 89.12 | 1040.18 |
| 89.13 | 849.482 |
| 89.14 | 797.473 |
| 89.15 | 970.837 |
| 89.16 | 780.137 |
| 89.17 | 936.164 |
| 89.18 | 832.146 |
| 89.19 | 676.118 |
| 89.2  | 1144.2  |
| 89.21 | 866.819 |
| 89.22 | 1092.19 |
| 89.23 | 849.482 |
| 89.24 | 1092.19 |
| 89.25 | 953.5   |
| 89.26 | 866.819 |
| 89.27 | 814.809 |
| 89.28 | 1040.18 |
| 89.29 | 953.5   |
| 89.3  | 953.5   |
| 89.31 | 1005.51 |
| 89.32 | 953.5   |
| 89.33 | 936.164 |
| 89.34 | 936.164 |
| 89.35 | 1109.53 |
| 89.36 | 970.837 |
| 89.37 | 728.128 |
| 89.38 | 988.173 |
| 89.39 | 918.828 |
| 89.4  | 797.473 |
| 89.41 | 918.828 |
| 89.42 | 988.173 |
| 89.43 | 866.819 |
| 89.44 | 1074.85 |
| 89.45 | 918.828 |
| 89.46 | 762.8   |
| 89.47 | 884.155 |
| 89.48 | 1005.51 |
| 89.49 | 918.828 |
| 89.5  | 814.809 |
| 89.51 | 901.491 |

|       |         |
|-------|---------|
| 89.52 | 1040.18 |
| 89.53 | 849.482 |
| 89.54 | 1126.86 |
| 89.55 | 797.473 |
| 89.56 | 1005.51 |
| 89.57 | 589.437 |
| 89.58 | 866.819 |
| 89.59 | 1161.54 |
| 89.6  | 953.5   |
| 89.61 | 710.791 |
| 89.62 | 849.482 |
| 89.63 | 884.155 |
| 89.64 | 658.782 |
| 89.65 | 832.146 |
| 89.66 | 953.5   |
| 89.67 | 1126.86 |
| 89.68 | 936.164 |
| 89.69 | 814.809 |
| 89.7  | 866.819 |
| 89.71 | 1005.51 |
| 89.72 | 832.146 |
| 89.73 | 1022.85 |
| 89.74 | 918.828 |
| 89.75 | 884.155 |
| 89.76 | 693.455 |
| 89.77 | 780.137 |
| 89.78 | 1126.86 |
| 89.79 | 762.8   |
| 89.8  | 849.482 |
| 89.81 | 884.155 |
| 89.82 | 953.5   |
| 89.83 | 745.464 |
| 89.84 | 970.837 |
| 89.85 | 832.146 |
| 89.86 | 970.837 |
| 89.87 | 849.482 |
| 89.88 | 866.819 |
| 89.89 | 814.809 |
| 89.9  | 884.155 |
| 89.91 | 988.173 |
| 89.92 | 797.473 |
| 89.93 | 953.5   |
| 89.94 | 1074.85 |
| 89.95 | 797.473 |



|       |         |
|-------|---------|
| 89.96 | 814.809 |
| 89.97 | 832.146 |
| 89.98 | 884.155 |
| 89.99 | 1109.53 |
| 90    | 797.473 |

|          |      |         |
|----------|------|---------|
| xrd100kg | 5    | 5010.21 |
|          | 5.01 | 4195.4  |
|          | 5.02 | 5062.22 |
|          | 5.03 | 4871.52 |
|          | 5.04 | 5027.55 |
|          | 5.05 | 4819.51 |
|          | 5.06 | 4975.54 |
|          | 5.07 | 4282.08 |
|          | 5.08 | 5131.57 |
|          | 5.09 | 4732.83 |
|          | 5.1  | 4576.8  |
|          | 5.11 | 5183.57 |
|          | 5.12 | 5131.57 |
|          | 5.13 | 4455.45 |
|          | 5.14 | 4611.47 |
|          | 5.15 | 4906.19 |
|          | 5.16 | 5270.26 |
|          | 5.17 | 4923.53 |
|          | 5.18 | 4524.79 |
|          | 5.19 | 4646.15 |
|          | 5.2  | 5044.88 |
|          | 5.21 | 5027.55 |
|          | 5.22 | 4663.48 |
|          | 5.23 | 4854.18 |
|          | 5.24 | 5183.57 |
|          | 5.25 | 4940.87 |
|          | 5.26 | 4975.54 |
|          | 5.27 | 4854.18 |
|          | 5.28 | 5218.25 |
|          | 5.29 | 4663.48 |
|          | 5.3  | 5443.62 |
|          | 5.31 | 5114.23 |
|          | 5.32 | 4646.15 |
|          | 5.33 | 4732.83 |
|          | 5.34 | 4992.87 |
|          | 5.35 | 5079.56 |
|          | 5.36 | 4472.78 |
|          | 5.37 | 5200.91 |

5.38 4923.53  
5.39 4507.46  
5.4 5148.9  
5.41 5010.21  
5.42 4680.82  
5.43 5010.21  
5.44 5010.21  
5.45 4906.19  
5.46 4906.19  
5.47 4663.48  
5.48 4854.18  
5.49 4750.17  
5.5 4403.44  
5.51 4958.2  
5.52 4906.19  
5.53 4784.84  
5.54 5027.55  
5.55 5183.57  
5.56 4576.8  
5.57 5218.25  
5.58 4802.17  
5.59 5114.23  
5.6 5478.29  
5.61 4958.2  
5.62 5096.89  
5.63 5408.95  
5.64 4784.84  
5.65 4871.52  
5.66 5408.95  
5.67 5166.24  
5.68 4923.53  
5.69 4750.17  
5.7 4854.18  
5.71 4698.16  
5.72 5044.88  
5.73 4784.84  
5.74 5443.62  
5.75 5270.26  
5.76 5166.24  
5.77 5235.58  
5.78 5200.91  
5.79 5304.93  
5.8 4524.79  
5.81 4767.5

5.82 4923.53  
5.83 5027.55  
5.84 5218.25  
5.85 5200.91  
5.86 4871.52  
5.87 5114.23  
5.88 5252.92  
5.89 5218.25  
5.9 4524.79  
5.91 4576.8  
5.92 4854.18  
5.93 4802.17  
5.94 4940.87  
5.95 4559.47  
5.96 4940.87  
5.97 5096.89  
5.98 5200.91  
5.99 5166.24  
6 4836.85  
6.01 4732.83  
6.02 5062.22  
6.03 4923.53  
6.04 5183.57  
6.05 4975.54  
6.06 5495.63  
6.07 4888.86  
6.08 5235.58  
6.09 4871.52  
6.1 4958.2  
6.11 5374.27  
6.12 4663.48  
6.13 5235.58  
6.14 4403.44  
6.15 4854.18  
6.16 5166.24  
6.17 5027.55  
6.18 5252.92  
6.19 4802.17  
6.2 5114.23  
6.21 4906.19  
6.22 4732.83  
6.23 4871.52  
6.24 4628.81  
6.25 5096.89

6.26 5096.89  
6.27 5044.88  
6.28 4715.49  
6.29 4819.51  
6.3 4611.47  
6.31 4698.16  
6.32 4940.87  
6.33 5096.89  
6.34 4455.45  
6.35 4472.78  
6.36 4802.17  
6.37 5044.88  
6.38 5391.61  
6.39 5252.92  
6.4 4784.84  
6.41 5287.59  
6.42 5287.59  
6.43 5703.67  
6.44 4663.48  
6.45 5131.57  
6.46 4958.2  
6.47 5114.23  
6.48 5096.89  
6.49 4819.51  
6.5 5270.26  
6.51 5426.28  
6.52 5044.88  
6.53 4923.53  
6.54 5183.57  
6.55 4923.53  
6.56 4628.81  
6.57 5339.6  
6.58 5079.56  
6.59 5148.9  
6.6 5096.89  
6.61 4802.17  
6.62 5564.98  
6.63 4750.17  
6.64 4819.51  
6.65 4767.5  
6.66 4386.1  
6.67 4680.82  
6.68 4732.83  
6.69 5322.27

6.7 4940.87  
6.71 5200.91  
6.72 5374.27  
6.73 4732.83  
6.74 5062.22  
6.75 4975.54  
6.76 4992.87  
6.77 4715.49  
6.78 4888.86  
6.79 4958.2  
6.8 5062.22  
6.81 4715.49  
6.82 4906.19  
6.83 4784.84  
6.84 5079.56  
6.85 4975.54  
6.86 5183.57  
6.87 4958.2  
6.88 5218.25  
6.89 5062.22  
6.9 5148.9  
6.91 5148.9  
6.92 5322.27  
6.93 4784.84  
6.94 4958.2  
6.95 5183.57  
6.96 4750.17  
6.97 5408.95  
6.98 4888.86  
6.99 4975.54  
7 5374.27  
7.01 4750.17  
7.02 4906.19  
7.03 4802.17  
7.04 5374.27  
7.05 5356.94  
7.06 4958.2  
7.07 5252.92  
7.08 5166.24  
7.09 4594.14  
7.1 4472.78  
7.11 4576.8  
7.12 4680.82  
7.13 4594.14

7.14 5166.24  
7.15 4975.54  
7.16 4594.14  
7.17 4802.17  
7.18 4594.14  
7.19 4663.48  
7.2 5062.22  
7.21 4455.45  
7.22 4992.87  
7.23 4698.16  
7.24 4594.14  
7.25 5044.88  
7.26 4906.19  
7.27 4628.81  
7.28 4802.17  
7.29 5426.28  
7.3 5044.88  
7.31 4819.51  
7.32 5287.59  
7.33 4680.82  
7.34 5322.27  
7.35 5408.95  
7.36 5235.58  
7.37 4802.17  
7.38 4923.53  
7.39 4871.52  
7.4 5270.26  
7.41 4888.86  
7.42 5443.62  
7.43 5044.88  
7.44 5183.57  
7.45 5200.91  
7.46 5010.21  
7.47 4871.52  
7.48 4958.2  
7.49 5426.28  
7.5 5010.21  
7.51 4836.85  
7.52 4715.49  
7.53 5027.55  
7.54 4576.8  
7.55 4923.53  
7.56 5304.93  
7.57 4854.18

7.58 4438.11  
7.59 5010.21  
7.6 4819.51  
7.61 4802.17  
7.62 4750.17  
7.63 4507.46  
7.64 5235.58  
7.65 4906.19  
7.66 5027.55  
7.67 4420.77  
7.68 4767.5  
7.69 4767.5  
7.7 4871.52  
7.71 5304.93  
7.72 4923.53  
7.73 4784.84  
7.74 5183.57  
7.75 4472.78  
7.76 4542.13  
7.77 5148.9  
7.78 4663.48  
7.79 4819.51  
7.8 5148.9  
7.81 4750.17  
7.82 4594.14  
7.83 4715.49  
7.84 4836.85  
7.85 4524.79  
7.86 4542.13  
7.87 4906.19  
7.88 4316.76  
7.89 4282.08  
7.9 4594.14  
7.91 4403.44  
7.92 4750.17  
7.93 4958.2  
7.94 5027.55  
7.95 4524.79  
7.96 4455.45  
7.97 4819.51  
7.98 4680.82  
7.99 4403.44  
8 4975.54  
8.01 4819.51

8.02 4888.86  
8.03 4784.84  
8.04 5339.6  
8.05 5027.55  
8.06 4420.77  
8.07 4316.76  
8.08 5062.22  
8.09 4940.87  
8.1 4420.77  
8.11 4802.17  
8.12 4455.45  
8.13 4888.86  
8.14 4542.13  
8.15 4576.8  
8.16 4940.87  
8.17 4854.18  
8.18 4594.14  
8.19 4975.54  
8.2 4871.52  
8.21 5096.89  
8.22 4975.54  
8.23 4715.49  
8.24 5010.21  
8.25 4836.85  
8.26 4975.54  
8.27 4784.84  
8.28 4802.17  
8.29 4368.77  
8.3 4455.45  
8.31 4836.85  
8.32 4854.18  
8.33 4594.14  
8.34 4403.44  
8.35 5079.56  
8.36 4750.17  
8.37 4074.05  
8.38 4438.11  
8.39 4923.53  
8.4 4767.5  
8.41 4386.1  
8.42 4542.13  
8.43 4750.17  
8.44 4975.54  
8.45 4888.86



8.46 5044.88  
8.47 5148.9  
8.48 4438.11  
8.49 5027.55  
8.5 4351.43  
8.51 4871.52  
8.52 4594.14  
8.53 4871.52  
8.54 4472.78  
8.55 4420.77  
8.56 4316.76  
8.57 4732.83  
8.58 4819.51  
8.59 5044.88  
8.6 4611.47  
8.61 4438.11  
8.62 4282.08  
8.63 5044.88  
8.64 4871.52  
8.65 4802.17  
8.66 4299.42  
8.67 4524.79  
8.68 4750.17  
8.69 4819.51  
8.7 5114.23  
8.71 5166.24  
8.72 4282.08  
8.73 4368.77  
8.74 4247.41  
8.75 4542.13  
8.76 4472.78  
8.77 4230.07  
8.78 4836.85  
8.79 4438.11  
8.8 4334.09  
8.81 4888.86  
8.82 4386.1  
8.83 5044.88  
8.84 4438.11  
8.85 4195.4  
8.86 4802.17  
8.87 4767.5  
8.88 4212.74  
8.89 4386.1

8.9 4143.39  
8.91 4576.8  
8.92 4178.07  
8.93 3935.36  
8.94 4854.18  
8.95 4975.54  
8.96 5096.89  
8.97 4854.18  
8.98 4108.72  
8.99 4715.49  
9 4247.41  
9.01 4472.78  
9.02 4698.16  
9.03 4455.45  
9.04 4143.39  
9.05 4524.79  
9.06 4420.77  
9.07 4247.41  
9.08 4628.81  
9.09 4576.8  
9.1 4958.2  
9.11 4420.77  
9.12 4784.84  
9.13 4282.08  
9.14 4126.06  
9.15 4160.73  
9.16 4732.83  
9.17 4732.83  
9.18 4732.83  
9.19 4576.8  
9.2 4576.8  
9.21 4126.06  
9.22 4663.48  
9.23 4316.76  
9.24 4732.83  
9.25 4732.83  
9.26 4611.47  
9.27 4559.47  
9.28 4178.07  
9.29 4056.71  
9.3 4299.42  
9.31 4802.17  
9.32 4663.48  
9.33 4160.73

9.34 3571.29  
9.35 4195.4  
9.36 3987.37  
9.37 4074.05  
9.38 4455.45  
9.39 4507.46  
9.4 4507.46  
9.41 4351.43  
9.42 4264.75  
9.43 4022.04  
9.44 4299.42  
9.45 4455.45  
9.46 4247.41  
9.47 3935.36  
9.48 3866.01  
9.49 4455.45  
9.5 4715.49  
9.51 4074.05  
9.52 4108.72  
9.53 3987.37  
9.54 4438.11  
9.55 4212.74  
9.56 4438.11  
9.57 4178.07  
9.58 4282.08  
9.59 4230.07  
9.6 4386.1  
9.61 4282.08  
9.62 4403.44  
9.63 5079.56  
9.64 4524.79  
9.65 4143.39  
9.66 3900.68  
9.67 3848.67  
9.68 3918.02  
9.69 4386.1  
9.7 4195.4  
9.71 4212.74  
9.72 4611.47  
9.73 4230.07  
9.74 4316.76  
9.75 4316.76  
9.76 4542.13  
9.77 4819.51

|       |         |
|-------|---------|
| 9.78  | 4230.07 |
| 9.79  | 4039.37 |
| 9.8   | 4351.43 |
| 9.81  | 3918.02 |
| 9.82  | 4039.37 |
| 9.83  | 4074.05 |
| 9.84  | 4004.7  |
| 9.85  | 4039.37 |
| 9.86  | 4056.71 |
| 9.87  | 4282.08 |
| 9.88  | 3918.02 |
| 9.89  | 4091.38 |
| 9.9   | 4126.06 |
| 9.91  | 4455.45 |
| 9.92  | 3848.67 |
| 9.93  | 4351.43 |
| 9.94  | 4039.37 |
| 9.95  | 3935.36 |
| 9.96  | 4074.05 |
| 9.97  | 3866.01 |
| 9.98  | 4368.77 |
| 9.99  | 4542.13 |
| 10    | 4386.1  |
| 10.01 | 4542.13 |
| 10.02 | 3918.02 |
| 10.03 | 4282.08 |
| 10.04 | 4351.43 |
| 10.05 | 4022.04 |
| 10.06 | 3987.37 |
| 10.07 | 4472.78 |
| 10.08 | 4108.72 |
| 10.09 | 4334.09 |
| 10.1  | 4455.45 |
| 10.11 | 4178.07 |
| 10.12 | 3883.35 |
| 10.13 | 4472.78 |
| 10.14 | 4802.17 |
| 10.15 | 4576.8  |
| 10.16 | 4438.11 |
| 10.17 | 4611.47 |
| 10.18 | 4195.4  |
| 10.19 | 4490.12 |
| 10.2  | 4455.45 |
| 10.21 | 4195.4  |

|       |         |
|-------|---------|
| 10.22 | 4247.41 |
| 10.23 | 4334.09 |
| 10.24 | 4490.12 |
| 10.25 | 4264.75 |
| 10.26 | 4264.75 |
| 10.27 | 4264.75 |
| 10.28 | 4420.77 |
| 10.29 | 4542.13 |
| 10.3  | 4056.71 |
| 10.31 | 4004.7  |
| 10.32 | 4178.07 |
| 10.33 | 4368.77 |
| 10.34 | 3900.68 |
| 10.35 | 3571.29 |
| 10.36 | 3796.67 |
| 10.37 | 3744.66 |
| 10.38 | 3779.33 |
| 10.39 | 4074.05 |
| 10.4  | 4178.07 |
| 10.41 | 3883.35 |
| 10.42 | 3571.29 |
| 10.43 | 3692.65 |
| 10.44 | 3900.68 |
| 10.45 | 3848.67 |
| 10.46 | 3640.64 |
| 10.47 | 3866.01 |
| 10.48 | 3952.69 |
| 10.49 | 4403.44 |
| 10.5  | 4507.46 |
| 10.51 | 4004.7  |
| 10.52 | 3935.36 |
| 10.53 | 4039.37 |
| 10.54 | 3709.98 |
| 10.55 | 4316.76 |
| 10.56 | 4282.08 |
| 10.57 | 4056.71 |
| 10.58 | 3883.35 |
| 10.59 | 3605.97 |
| 10.6  | 4126.06 |
| 10.61 | 4091.38 |
| 10.62 | 4299.42 |
| 10.63 | 3744.66 |
| 10.64 | 4247.41 |
| 10.65 | 3866.01 |

|       |         |
|-------|---------|
| 10.66 | 4160.73 |
| 10.67 | 3796.67 |
| 10.68 | 3640.64 |
| 10.69 | 3883.35 |
| 10.7  | 3380.59 |
| 10.71 | 4126.06 |
| 10.72 | 4022.04 |
| 10.73 | 3831.34 |
| 10.74 | 3796.67 |
| 10.75 | 3588.63 |
| 10.76 | 4091.38 |
| 10.77 | 3987.37 |
| 10.78 | 3727.32 |
| 10.79 | 4004.7  |
| 10.8  | 4022.04 |
| 10.81 | 3536.62 |
| 10.82 | 3744.66 |
| 10.83 | 3640.64 |
| 10.84 | 3380.59 |
| 10.85 | 3501.95 |
| 10.86 | 3588.63 |
| 10.87 | 3727.32 |
| 10.88 | 3935.36 |
| 10.89 | 4316.76 |
| 10.9  | 3692.65 |
| 10.91 | 4091.38 |
| 10.92 | 3744.66 |
| 10.93 | 4160.73 |
| 10.94 | 3848.67 |
| 10.95 | 4004.7  |
| 10.96 | 3640.64 |
| 10.97 | 3727.32 |
| 10.98 | 3571.29 |
| 10.99 | 3657.97 |
| 11    | 3553.96 |
| 11.01 | 4039.37 |
| 11.02 | 3987.37 |
| 11.03 | 3883.35 |
| 11.04 | 3866.01 |
| 11.05 | 3207.23 |
| 11.06 | 4299.42 |
| 11.07 | 3657.97 |
| 11.08 | 3952.69 |
| 11.09 | 3640.64 |

11.1 3397.93  
11.11 3675.31  
11.12 3779.33  
11.13 3380.59  
11.14 3501.95  
11.15 3571.29  
11.16 3571.29  
11.17 3588.63  
11.18 3796.67  
11.19 3536.62  
11.2 4247.41  
11.21 3605.97  
11.22 3484.61  
11.23 3866.01  
11.24 3744.66  
11.25 3675.31  
11.26 3866.01  
11.27 3657.97  
11.28 3814  
11.29 3571.29  
11.3 3918.02  
11.31 3883.35  
11.32 3796.67  
11.33 4091.38  
11.34 3449.94  
11.35 3796.67  
11.36 3970.03  
11.37 3588.63  
11.38 3727.32  
11.39 3848.67  
11.4 3553.96  
11.41 3970.03  
11.42 3814  
11.43 3761.99  
11.44 3727.32  
11.45 3814  
11.46 3952.69  
11.47 3484.61  
11.48 3553.96  
11.49 3727.32  
11.5 4074.05  
11.51 3709.98  
11.52 3363.26  
11.53 3588.63

|       |         |
|-------|---------|
| 11.54 | 3918.02 |
| 11.55 | 3380.59 |
| 11.56 | 3675.31 |
| 11.57 | 3952.69 |
| 11.58 | 3657.97 |
| 11.59 | 3103.21 |
| 11.6  | 3536.62 |
| 11.61 | 3796.67 |
| 11.62 | 3293.91 |
| 11.63 | 3259.24 |
| 11.64 | 3779.33 |
| 11.65 | 3744.66 |
| 11.66 | 3640.64 |
| 11.67 | 3692.65 |
| 11.68 | 3571.29 |
| 11.69 | 3293.91 |
| 11.7  | 3744.66 |
| 11.71 | 3345.92 |
| 11.72 | 3207.23 |
| 11.73 | 3692.65 |
| 11.74 | 3623.3  |
| 11.75 | 3449.94 |
| 11.76 | 3588.63 |
| 11.77 | 3345.92 |
| 11.78 | 3519.28 |
| 11.79 | 3397.93 |
| 11.8  | 3189.89 |
| 11.81 | 3571.29 |
| 11.82 | 3761.99 |
| 11.83 | 3328.58 |
| 11.84 | 3987.37 |
| 11.85 | 3588.63 |
| 11.86 | 3224.56 |
| 11.87 | 3189.89 |
| 11.88 | 3137.88 |
| 11.89 | 2999.19 |
| 11.9  | 3831.34 |
| 11.91 | 3397.93 |
| 11.92 | 3432.6  |
| 11.93 | 3345.92 |
| 11.94 | 3692.65 |
| 11.95 | 3172.56 |
| 11.96 | 3224.56 |
| 11.97 | 3241.9  |



|       |         |
|-------|---------|
| 11.98 | 3224.56 |
| 11.99 | 3553.96 |
| 12    | 3311.25 |
| 12.01 | 3640.64 |
| 12.02 | 3761.99 |
| 12.03 | 3345.92 |
| 12.04 | 3137.88 |
| 12.05 | 3259.24 |
| 12.06 | 3328.58 |
| 12.07 | 3189.89 |
| 12.08 | 3172.56 |
| 12.09 | 3293.91 |
| 12.1  | 3172.56 |
| 12.11 | 3709.98 |
| 12.12 | 3380.59 |
| 12.13 | 3605.97 |
| 12.14 | 2929.85 |
| 12.15 | 3276.57 |
| 12.16 | 3155.22 |
| 12.17 | 3276.57 |
| 12.18 | 3727.32 |
| 12.19 | 3449.94 |
| 12.2  | 3415.26 |
| 12.21 | 3363.26 |
| 12.22 | 3189.89 |
| 12.23 | 3259.24 |
| 12.24 | 3189.89 |
| 12.25 | 3484.61 |
| 12.26 | 3189.89 |
| 12.27 | 3536.62 |
| 12.28 | 3293.91 |
| 12.29 | 3363.26 |
| 12.3  | 3155.22 |
| 12.31 | 3155.22 |
| 12.32 | 3016.53 |
| 12.33 | 3155.22 |
| 12.34 | 3536.62 |
| 12.35 | 3103.21 |
| 12.36 | 3484.61 |
| 12.37 | 3363.26 |
| 12.38 | 3345.92 |
| 12.39 | 3380.59 |
| 12.4  | 3519.28 |
| 12.41 | 3397.93 |

|       |         |
|-------|---------|
| 12.42 | 3241.9  |
| 12.43 | 3536.62 |
| 12.44 | 3484.61 |
| 12.45 | 2929.85 |
| 12.46 | 3155.22 |
| 12.47 | 3345.92 |
| 12.48 | 3571.29 |
| 12.49 | 3501.95 |
| 12.5  | 3328.58 |
| 12.51 | 3259.24 |
| 12.52 | 3293.91 |
| 12.53 | 3519.28 |
| 12.54 | 3224.56 |
| 12.55 | 3345.92 |
| 12.56 | 3484.61 |
| 12.57 | 3155.22 |
| 12.58 | 3259.24 |
| 12.59 | 3501.95 |
| 12.6  | 3432.6  |
| 12.61 | 3345.92 |
| 12.62 | 3779.33 |
| 12.63 | 3328.58 |
| 12.64 | 3415.26 |
| 12.65 | 3363.26 |
| 12.66 | 3501.95 |
| 12.67 | 3016.53 |
| 12.68 | 3293.91 |
| 12.69 | 3553.96 |
| 12.7  | 3380.59 |
| 12.71 | 3501.95 |
| 12.72 | 3987.37 |
| 12.73 | 3501.95 |
| 12.74 | 3484.61 |
| 12.75 | 3640.64 |
| 12.76 | 3432.6  |
| 12.77 | 3224.56 |
| 12.78 | 3519.28 |
| 12.79 | 3293.91 |
| 12.8  | 3189.89 |
| 12.81 | 3553.96 |
| 12.82 | 3588.63 |
| 12.83 | 3345.92 |
| 12.84 | 3207.23 |
| 12.85 | 3207.23 |

|       |         |
|-------|---------|
| 12.86 | 3155.22 |
| 12.87 | 2756.48 |
| 12.88 | 3345.92 |
| 12.89 | 3727.32 |
| 12.9  | 3311.25 |
| 12.91 | 3051.2  |
| 12.92 | 3241.9  |
| 12.93 | 3085.87 |
| 12.94 | 3276.57 |
| 12.95 | 3207.23 |
| 12.96 | 3137.88 |
| 12.97 | 3397.93 |
| 12.98 | 3189.89 |
| 12.99 | 3415.26 |
| 13    | 3432.6  |
| 13.01 | 3103.21 |
| 13.02 | 3120.55 |
| 13.03 | 3293.91 |
| 13.04 | 3588.63 |
| 13.05 | 3363.26 |
| 13.06 | 3293.91 |
| 13.07 | 2825.83 |
| 13.08 | 3085.87 |
| 13.09 | 3068.54 |
| 13.1  | 3033.86 |
| 13.11 | 3137.88 |
| 13.12 | 3103.21 |
| 13.13 | 3293.91 |
| 13.14 | 3311.25 |
| 13.15 | 3623.3  |
| 13.16 | 3311.25 |
| 13.17 | 2895.17 |
| 13.18 | 3155.22 |
| 13.19 | 2929.85 |
| 13.2  | 2981.86 |
| 13.21 | 2895.17 |
| 13.22 | 2895.17 |
| 13.23 | 2635.13 |
| 13.24 | 2808.49 |
| 13.25 | 2808.49 |
| 13.26 | 2999.19 |
| 13.27 | 2999.19 |
| 13.28 | 3033.86 |
| 13.29 | 3501.95 |

13.3 3155.22  
13.31 3207.23  
13.32 3172.56  
13.33 3779.33  
13.34 3068.54  
13.35 3103.21  
13.36 2877.84  
13.37 3137.88  
13.38 3068.54  
13.39 2912.51  
13.4 3016.53  
13.41 2999.19  
13.42 3363.26  
13.43 3155.22  
13.44 3016.53  
13.45 2825.83  
13.46 3276.57  
13.47 2999.19  
13.48 2843.16  
13.49 2791.16  
13.5 2929.85  
13.51 2739.15  
13.52 2999.19  
13.53 2843.16  
13.54 2583.12  
13.55 3085.87  
13.56 3051.2  
13.57 2739.15  
13.58 2981.86  
13.59 2669.8  
13.6 2825.83  
13.61 3328.58  
13.62 3068.54  
13.63 2669.8  
13.64 3016.53  
13.65 2929.85  
13.66 3155.22  
13.67 2947.18  
13.68 3068.54  
13.69 2877.84  
13.7 3155.22  
13.71 3155.22  
13.72 2635.13  
13.73 3068.54

|       |         |
|-------|---------|
| 13.74 | 2825.83 |
| 13.75 | 2687.14 |
| 13.76 | 3016.53 |
| 13.77 | 2808.49 |
| 13.78 | 3051.2  |
| 13.79 | 3155.22 |
| 13.8  | 2981.86 |
| 13.81 | 2773.82 |
| 13.82 | 3016.53 |
| 13.83 | 3051.2  |
| 13.84 | 2999.19 |
| 13.85 | 2929.85 |
| 13.86 | 2860.5  |
| 13.87 | 3259.24 |
| 13.88 | 2964.52 |
| 13.89 | 3380.59 |
| 13.9  | 3172.56 |
| 13.91 | 3068.54 |
| 13.92 | 2929.85 |
| 13.93 | 2756.48 |
| 13.94 | 3103.21 |
| 13.95 | 3207.23 |
| 13.96 | 3033.86 |
| 13.97 | 3120.55 |
| 13.98 | 3311.25 |
| 13.99 | 2877.84 |
| 14    | 3155.22 |
| 14.01 | 2687.14 |
| 14.02 | 2912.51 |
| 14.03 | 2860.5  |
| 14.04 | 3172.56 |
| 14.05 | 2964.52 |
| 14.06 | 2912.51 |
| 14.07 | 2947.18 |
| 14.08 | 3241.9  |
| 14.09 | 3085.87 |
| 14.1  | 3137.88 |
| 14.11 | 3189.89 |
| 14.12 | 3085.87 |
| 14.13 | 2947.18 |
| 14.14 | 3189.89 |
| 14.15 | 3311.25 |
| 14.16 | 2843.16 |
| 14.17 | 3120.55 |

|       |         |
|-------|---------|
| 14.18 | 3380.59 |
| 14.19 | 3328.58 |
| 14.2  | 2999.19 |
| 14.21 | 3033.86 |
| 14.22 | 3103.21 |
| 14.23 | 2773.82 |
| 14.24 | 3276.57 |
| 14.25 | 3155.22 |
| 14.26 | 2669.8  |
| 14.27 | 2652.46 |
| 14.28 | 2704.47 |
| 14.29 | 2773.82 |
| 14.3  | 2895.17 |
| 14.31 | 3363.26 |
| 14.32 | 2652.46 |
| 14.33 | 2704.47 |
| 14.34 | 2652.46 |
| 14.35 | 2860.5  |
| 14.36 | 3155.22 |
| 14.37 | 2669.8  |
| 14.38 | 2999.19 |
| 14.39 | 2964.52 |
| 14.4  | 2825.83 |
| 14.41 | 2860.5  |
| 14.42 | 2843.16 |
| 14.43 | 2825.83 |
| 14.44 | 2999.19 |
| 14.45 | 2600.46 |
| 14.46 | 3051.2  |
| 14.47 | 2895.17 |
| 14.48 | 3189.89 |
| 14.49 | 2773.82 |
| 14.5  | 2999.19 |
| 14.51 | 2669.8  |
| 14.52 | 2791.16 |
| 14.53 | 2843.16 |
| 14.54 | 3328.58 |
| 14.55 | 2461.76 |
| 14.56 | 2600.46 |
| 14.57 | 2791.16 |
| 14.58 | 2964.52 |
| 14.59 | 2981.86 |
| 14.6  | 2877.84 |
| 14.61 | 3120.55 |

|       |         |
|-------|---------|
| 14.62 | 2565.78 |
| 14.63 | 2773.82 |
| 14.64 | 2739.15 |
| 14.65 | 2479.1  |
| 14.66 | 2600.46 |
| 14.67 | 2860.5  |
| 14.68 | 2600.46 |
| 14.69 | 2531.11 |
| 14.7  | 2739.15 |
| 14.71 | 2843.16 |
| 14.72 | 2652.46 |
| 14.73 | 2947.18 |
| 14.74 | 2912.51 |
| 14.75 | 2652.46 |
| 14.76 | 3172.56 |
| 14.77 | 2687.14 |
| 14.78 | 2565.78 |
| 14.79 | 2548.45 |
| 14.8  | 2929.85 |
| 14.81 | 2548.45 |
| 14.82 | 2929.85 |
| 14.83 | 2583.12 |
| 14.84 | 2340.41 |
| 14.85 | 2669.8  |
| 14.86 | 2825.83 |
| 14.87 | 2808.49 |
| 14.88 | 3259.24 |
| 14.89 | 2999.19 |
| 14.9  | 2739.15 |
| 14.91 | 2669.8  |
| 14.92 | 2548.45 |
| 14.93 | 2704.47 |
| 14.94 | 3033.86 |
| 14.95 | 2947.18 |
| 14.96 | 2409.76 |
| 14.97 | 2704.47 |
| 14.98 | 2756.48 |
| 14.99 | 2929.85 |
| 15    | 2843.16 |
| 15.01 | 2461.76 |
| 15.02 | 2583.12 |
| 15.03 | 2981.86 |
| 15.04 | 2825.83 |
| 15.05 | 2756.48 |

|       |         |
|-------|---------|
| 15.06 | 2739.15 |
| 15.07 | 2409.76 |
| 15.08 | 2479.1  |
| 15.09 | 2617.79 |
| 15.1  | 2999.19 |
| 15.11 | 2912.51 |
| 15.12 | 2999.19 |
| 15.13 | 2583.12 |
| 15.14 | 2825.83 |
| 15.15 | 2635.13 |
| 15.16 | 2617.79 |
| 15.17 | 2791.16 |
| 15.18 | 2600.46 |
| 15.19 | 2583.12 |
| 15.2  | 2305.74 |
| 15.21 | 2427.09 |
| 15.22 | 2756.48 |
| 15.23 | 2860.5  |
| 15.24 | 2704.47 |
| 15.25 | 2375.08 |
| 15.26 | 2531.11 |
| 15.27 | 2791.16 |
| 15.28 | 2461.76 |
| 15.29 | 3051.2  |
| 15.3  | 2583.12 |
| 15.31 | 2409.76 |
| 15.32 | 2617.79 |
| 15.33 | 2479.1  |
| 15.34 | 2479.1  |
| 15.35 | 2323.07 |
| 15.36 | 2652.46 |
| 15.37 | 2756.48 |
| 15.38 | 2548.45 |
| 15.39 | 2652.46 |
| 15.4  | 2600.46 |
| 15.41 | 2496.44 |
| 15.42 | 2340.41 |
| 15.43 | 2739.15 |
| 15.44 | 2739.15 |
| 15.45 | 2721.81 |
| 15.46 | 2739.15 |
| 15.47 | 2791.16 |
| 15.48 | 2843.16 |
| 15.49 | 2652.46 |



|       |         |
|-------|---------|
| 15.5  | 2860.5  |
| 15.51 | 2531.11 |
| 15.52 | 2617.79 |
| 15.53 | 2479.1  |
| 15.54 | 2756.48 |
| 15.55 | 2531.11 |
| 15.56 | 2756.48 |
| 15.57 | 2635.13 |
| 15.58 | 2461.76 |
| 15.59 | 2929.85 |
| 15.6  | 2929.85 |
| 15.61 | 2357.75 |
| 15.62 | 2635.13 |
| 15.63 | 2444.43 |
| 15.64 | 2409.76 |
| 15.65 | 2375.08 |
| 15.66 | 2617.79 |
| 15.67 | 2860.5  |
| 15.68 | 2877.84 |
| 15.69 | 2860.5  |
| 15.7  | 2513.77 |
| 15.71 | 2877.84 |
| 15.72 | 2721.81 |
| 15.73 | 2583.12 |
| 15.74 | 2461.76 |
| 15.75 | 2704.47 |
| 15.76 | 2999.19 |
| 15.77 | 2739.15 |
| 15.78 | 2444.43 |
| 15.79 | 2513.77 |
| 15.8  | 2427.09 |
| 15.81 | 2791.16 |
| 15.82 | 2895.17 |
| 15.83 | 2808.49 |
| 15.84 | 2496.44 |
| 15.85 | 2687.14 |
| 15.86 | 2461.76 |
| 15.87 | 2565.78 |
| 15.88 | 2704.47 |
| 15.89 | 3051.2  |
| 15.9  | 2548.45 |
| 15.91 | 2721.81 |
| 15.92 | 2669.8  |
| 15.93 | 2444.43 |

|       |         |
|-------|---------|
| 15.94 | 2583.12 |
| 15.95 | 2479.1  |
| 15.96 | 2565.78 |
| 15.97 | 2444.43 |
| 15.98 | 2947.18 |
| 15.99 | 2513.77 |
| 16    | 2687.14 |
| 16.01 | 2721.81 |
| 16.02 | 2877.84 |
| 16.03 | 2999.19 |
| 16.04 | 2756.48 |
| 16.05 | 2999.19 |
| 16.06 | 2617.79 |
| 16.07 | 2773.82 |
| 16.08 | 2808.49 |
| 16.09 | 2565.78 |
| 16.1  | 2687.14 |
| 16.11 | 2721.81 |
| 16.12 | 2565.78 |
| 16.13 | 2652.46 |
| 16.14 | 2843.16 |
| 16.15 | 2583.12 |
| 16.16 | 2791.16 |
| 16.17 | 2617.79 |
| 16.18 | 2583.12 |
| 16.19 | 2409.76 |
| 16.2  | 2340.41 |
| 16.21 | 2548.45 |
| 16.22 | 2999.19 |
| 16.23 | 2669.8  |
| 16.24 | 2409.76 |
| 16.25 | 2739.15 |
| 16.26 | 2687.14 |
| 16.27 | 2375.08 |
| 16.28 | 2687.14 |
| 16.29 | 2721.81 |
| 16.3  | 2340.41 |
| 16.31 | 2444.43 |
| 16.32 | 2461.76 |
| 16.33 | 2444.43 |
| 16.34 | 2288.4  |
| 16.35 | 2149.71 |
| 16.36 | 2583.12 |
| 16.37 | 2687.14 |

|       |         |
|-------|---------|
| 16.38 | 2219.06 |
| 16.39 | 2184.38 |
| 16.4  | 2531.11 |
| 16.41 | 2392.42 |
| 16.42 | 2288.4  |
| 16.43 | 2427.09 |
| 16.44 | 2288.4  |
| 16.45 | 2600.46 |
| 16.46 | 2253.73 |
| 16.47 | 2739.15 |
| 16.48 | 2565.78 |
| 16.49 | 2427.09 |
| 16.5  | 2635.13 |
| 16.51 | 2548.45 |
| 16.52 | 2357.75 |
| 16.53 | 2947.18 |
| 16.54 | 2167.05 |
| 16.55 | 2305.74 |
| 16.56 | 2531.11 |
| 16.57 | 2808.49 |
| 16.58 | 2305.74 |
| 16.59 | 3051.2  |
| 16.6  | 2444.43 |
| 16.61 | 2652.46 |
| 16.62 | 2305.74 |
| 16.63 | 2323.07 |
| 16.64 | 2271.06 |
| 16.65 | 2513.77 |
| 16.66 | 2808.49 |
| 16.67 | 2409.76 |
| 16.68 | 2357.75 |
| 16.69 | 2357.75 |
| 16.7  | 2357.75 |
| 16.71 | 2236.39 |
| 16.72 | 2444.43 |
| 16.73 | 2565.78 |
| 16.74 | 2236.39 |
| 16.75 | 2097.7  |
| 16.76 | 2427.09 |
| 16.77 | 2427.09 |
| 16.78 | 2323.07 |
| 16.79 | 2236.39 |
| 16.8  | 2531.11 |
| 16.81 | 2201.72 |

|       |         |
|-------|---------|
| 16.82 | 2461.76 |
| 16.83 | 2184.38 |
| 16.84 | 2531.11 |
| 16.85 | 2236.39 |
| 16.86 | 2253.73 |
| 16.87 | 2201.72 |
| 16.88 | 2340.41 |
| 16.89 | 2617.79 |
| 16.9  | 2271.06 |
| 16.91 | 2704.47 |
| 16.92 | 2496.44 |
| 16.93 | 2167.05 |
| 16.94 | 2461.76 |
| 16.95 | 2219.06 |
| 16.96 | 2028.36 |
| 16.97 | 2357.75 |
| 16.98 | 2548.45 |
| 16.99 | 2843.16 |
| 17    | 2305.74 |
| 17.01 | 2149.71 |
| 17.02 | 2392.42 |
| 17.03 | 2496.44 |
| 17.04 | 2496.44 |
| 17.05 | 2375.08 |
| 17.06 | 1941.67 |
| 17.07 | 2427.09 |
| 17.08 | 2635.13 |
| 17.09 | 2271.06 |
| 17.1  | 2617.79 |
| 17.11 | 2115.04 |
| 17.12 | 2409.76 |
| 17.13 | 2704.47 |
| 17.14 | 2756.48 |
| 17.15 | 2548.45 |
| 17.16 | 2600.46 |
| 17.17 | 2600.46 |
| 17.18 | 2271.06 |
| 17.19 | 2271.06 |
| 17.2  | 2184.38 |
| 17.21 | 2149.71 |
| 17.22 | 2236.39 |
| 17.23 | 2427.09 |
| 17.24 | 2375.08 |
| 17.25 | 2583.12 |

|       |         |
|-------|---------|
| 17.26 | 2323.07 |
| 17.27 | 2496.44 |
| 17.28 | 2305.74 |
| 17.29 | 1993.68 |
| 17.3  | 2097.7  |
| 17.31 | 2271.06 |
| 17.32 | 2045.69 |
| 17.33 | 2132.37 |
| 17.34 | 2201.72 |
| 17.35 | 2323.07 |
| 17.36 | 2409.76 |
| 17.37 | 2548.45 |
| 17.38 | 2392.42 |
| 17.39 | 2340.41 |
| 17.4  | 2115.04 |
| 17.41 | 2565.78 |
| 17.42 | 1993.68 |
| 17.43 | 2357.75 |
| 17.44 | 2479.1  |
| 17.45 | 2271.06 |
| 17.46 | 2340.41 |
| 17.47 | 2375.08 |
| 17.48 | 2513.77 |
| 17.49 | 2340.41 |
| 17.5  | 2600.46 |
| 17.51 | 2548.45 |
| 17.52 | 2392.42 |
| 17.53 | 2305.74 |
| 17.54 | 2496.44 |
| 17.55 | 2167.05 |
| 17.56 | 2496.44 |
| 17.57 | 2132.37 |
| 17.58 | 2496.44 |
| 17.59 | 2011.02 |
| 17.6  | 2132.37 |
| 17.61 | 2496.44 |
| 17.62 | 2600.46 |
| 17.63 | 2479.1  |
| 17.64 | 2236.39 |
| 17.65 | 2513.77 |
| 17.66 | 2496.44 |
| 17.67 | 2271.06 |
| 17.68 | 2444.43 |
| 17.69 | 2184.38 |

|       |         |
|-------|---------|
| 17.7  | 2461.76 |
| 17.71 | 2444.43 |
| 17.72 | 2392.42 |
| 17.73 | 2461.76 |
| 17.74 | 2427.09 |
| 17.75 | 2409.76 |
| 17.76 | 2271.06 |
| 17.77 | 2444.43 |
| 17.78 | 2461.76 |
| 17.79 | 2149.71 |
| 17.8  | 2548.45 |
| 17.81 | 2028.36 |
| 17.82 | 2236.39 |
| 17.83 | 2375.08 |
| 17.84 | 2236.39 |
| 17.85 | 2479.1  |
| 17.86 | 2149.71 |
| 17.87 | 2340.41 |
| 17.88 | 2305.74 |
| 17.89 | 2392.42 |
| 17.9  | 2115.04 |
| 17.91 | 2305.74 |
| 17.92 | 2063.03 |
| 17.93 | 2340.41 |
| 17.94 | 2461.76 |
| 17.95 | 2357.75 |
| 17.96 | 2045.69 |
| 17.97 | 2340.41 |
| 17.98 | 2427.09 |
| 17.99 | 2340.41 |
| 18    | 2201.72 |
| 18.01 | 2253.73 |
| 18.02 | 2773.82 |
| 18.03 | 2080.36 |
| 18.04 | 2063.03 |
| 18.05 | 2201.72 |
| 18.06 | 2253.73 |
| 18.07 | 2149.71 |
| 18.08 | 2375.08 |
| 18.09 | 2167.05 |
| 18.1  | 2219.06 |
| 18.11 | 2201.72 |
| 18.12 | 2253.73 |
| 18.13 | 2357.75 |

18.14 2236.39  
18.15 2219.06  
18.16 2323.07  
18.17 2288.4  
18.18 2201.72  
18.19 2392.42  
18.2 2149.71  
18.21 2323.07  
18.22 2444.43  
18.23 2340.41  
18.24 2305.74  
18.25 2080.36  
18.26 2201.72  
18.27 2080.36  
18.28 2305.74  
18.29 2461.76  
18.3 2097.7  
18.31 2704.47  
18.32 2097.7  
18.33 1785.65  
18.34 2045.69  
18.35 2080.36  
18.36 2323.07  
18.37 2340.41  
18.38 2600.46  
18.39 2375.08  
18.4 2011.02  
18.41 2461.76  
18.42 2427.09  
18.43 2375.08  
18.44 2635.13  
18.45 2271.06  
18.46 2357.75  
18.47 2271.06  
18.48 2357.75  
18.49 2357.75  
18.5 2115.04  
18.51 1872.33  
18.52 2097.7  
18.53 2132.37  
18.54 2323.07  
18.55 2427.09  
18.56 2392.42  
18.57 2184.38

|       |         |
|-------|---------|
| 18.58 | 2288.4  |
| 18.59 | 2305.74 |
| 18.6  | 2132.37 |
| 18.61 | 2149.71 |
| 18.62 | 2115.04 |
| 18.63 | 2063.03 |
| 18.64 | 1768.31 |
| 18.65 | 2323.07 |
| 18.66 | 2427.09 |
| 18.67 | 2444.43 |
| 18.68 | 1993.68 |
| 18.69 | 2375.08 |
| 18.7  | 2531.11 |
| 18.71 | 1837.66 |
| 18.72 | 1750.97 |
| 18.73 | 2340.41 |
| 18.74 | 2392.42 |
| 18.75 | 2080.36 |
| 18.76 | 2063.03 |
| 18.77 | 2236.39 |
| 18.78 | 2375.08 |
| 18.79 | 1976.35 |
| 18.8  | 2201.72 |
| 18.81 | 2357.75 |
| 18.82 | 2652.46 |
| 18.83 | 2513.77 |
| 18.84 | 2461.76 |
| 18.85 | 2531.11 |
| 18.86 | 2045.69 |
| 18.87 | 2392.42 |
| 18.88 | 2288.4  |
| 18.89 | 2219.06 |
| 18.9  | 2375.08 |
| 18.91 | 1993.68 |
| 18.92 | 2132.37 |
| 18.93 | 2132.37 |
| 18.94 | 2080.36 |
| 18.95 | 2427.09 |
| 18.96 | 2132.37 |
| 18.97 | 2461.76 |
| 18.98 | 2219.06 |
| 18.99 | 2149.71 |
| 19    | 2791.16 |
| 19.01 | 2548.45 |



|       |         |
|-------|---------|
| 19.02 | 2583.12 |
| 19.03 | 2756.48 |
| 19.04 | 2635.13 |
| 19.05 | 2600.46 |
| 19.06 | 2305.74 |
| 19.07 | 2843.16 |
| 19.08 | 2357.75 |
| 19.09 | 2531.11 |
| 19.1  | 2704.47 |
| 19.11 | 2600.46 |
| 19.12 | 2652.46 |
| 19.13 | 2687.14 |
| 19.14 | 2548.45 |
| 19.15 | 2531.11 |
| 19.16 | 2496.44 |
| 19.17 | 2392.42 |
| 19.18 | 2583.12 |
| 19.19 | 2375.08 |
| 19.2  | 2513.77 |
| 19.21 | 2652.46 |
| 19.22 | 2600.46 |
| 19.23 | 1907    |
| 19.24 | 2323.07 |
| 19.25 | 2323.07 |
| 19.26 | 2097.7  |
| 19.27 | 2184.38 |
| 19.28 | 2375.08 |
| 19.29 | 2305.74 |
| 19.3  | 2340.41 |
| 19.31 | 2253.73 |
| 19.32 | 2167.05 |
| 19.33 | 2323.07 |
| 19.34 | 2513.77 |
| 19.35 | 2028.36 |
| 19.36 | 2479.1  |
| 19.37 | 2305.74 |
| 19.38 | 2392.42 |
| 19.39 | 2097.7  |
| 19.4  | 2253.73 |
| 19.41 | 1976.35 |
| 19.42 | 2409.76 |
| 19.43 | 2323.07 |
| 19.44 | 2080.36 |
| 19.45 | 2097.7  |

|       |         |
|-------|---------|
| 19.46 | 2271.06 |
| 19.47 | 2427.09 |
| 19.48 | 2184.38 |
| 19.49 | 2479.1  |
| 19.5  | 2184.38 |
| 19.51 | 2028.36 |
| 19.52 | 2011.02 |
| 19.53 | 2305.74 |
| 19.54 | 2028.36 |
| 19.55 | 2080.36 |
| 19.56 | 2479.1  |
| 19.57 | 2028.36 |
| 19.58 | 2184.38 |
| 19.59 | 1802.98 |
| 19.6  | 2149.71 |
| 19.61 | 2288.4  |
| 19.62 | 2115.04 |
| 19.63 | 2583.12 |
| 19.64 | 2357.75 |
| 19.65 | 2097.7  |
| 19.66 | 2236.39 |
| 19.67 | 2409.76 |
| 19.68 | 2392.42 |
| 19.69 | 2201.72 |
| 19.7  | 2305.74 |
| 19.71 | 2236.39 |
| 19.72 | 2531.11 |
| 19.73 | 2028.36 |
| 19.74 | 2427.09 |
| 19.75 | 2080.36 |
| 19.76 | 1837.66 |
| 19.77 | 2219.06 |
| 19.78 | 2184.38 |
| 19.79 | 2201.72 |
| 19.8  | 2375.08 |
| 19.81 | 2011.02 |
| 19.82 | 1941.67 |
| 19.83 | 2479.1  |
| 19.84 | 2115.04 |
| 19.85 | 1924.34 |
| 19.86 | 2149.71 |
| 19.87 | 2201.72 |
| 19.88 | 2115.04 |
| 19.89 | 1959.01 |

|       |         |
|-------|---------|
| 19.9  | 2201.72 |
| 19.91 | 1993.68 |
| 19.92 | 1889.66 |
| 19.93 | 1889.66 |
| 19.94 | 1872.33 |
| 19.95 | 2236.39 |
| 19.96 | 2219.06 |
| 19.97 | 2080.36 |
| 19.98 | 2375.08 |
| 19.99 | 1854.99 |
| 20    | 2253.73 |
| 20.01 | 2201.72 |
| 20.02 | 1976.35 |
| 20.03 | 2219.06 |
| 20.04 | 2115.04 |
| 20.05 | 1993.68 |
| 20.06 | 2288.4  |
| 20.07 | 2271.06 |
| 20.08 | 2063.03 |
| 20.09 | 2357.75 |
| 20.1  | 2219.06 |
| 20.11 | 2340.41 |
| 20.12 | 2392.42 |
| 20.13 | 2167.05 |
| 20.14 | 2323.07 |
| 20.15 | 2375.08 |
| 20.16 | 2253.73 |
| 20.17 | 1959.01 |
| 20.18 | 2080.36 |
| 20.19 | 2271.06 |
| 20.2  | 2461.76 |
| 20.21 | 2392.42 |
| 20.22 | 2773.82 |
| 20.23 | 2427.09 |
| 20.24 | 2167.05 |
| 20.25 | 2565.78 |
| 20.26 | 2427.09 |
| 20.27 | 2392.42 |
| 20.28 | 2687.14 |
| 20.29 | 2999.19 |
| 20.3  | 2427.09 |
| 20.31 | 2149.71 |
| 20.32 | 2531.11 |
| 20.33 | 2513.77 |

|       |         |
|-------|---------|
| 20.34 | 3016.53 |
| 20.35 | 3051.2  |
| 20.36 | 2877.84 |
| 20.37 | 3103.21 |
| 20.38 | 2756.48 |
| 20.39 | 2739.15 |
| 20.4  | 3207.23 |
| 20.41 | 2964.52 |
| 20.42 | 3155.22 |
| 20.43 | 3311.25 |
| 20.44 | 3259.24 |
| 20.45 | 2912.51 |
| 20.46 | 3085.87 |
| 20.47 | 3293.91 |
| 20.48 | 3120.55 |
| 20.49 | 3345.92 |
| 20.5  | 3415.26 |
| 20.51 | 3224.56 |
| 20.52 | 3553.96 |
| 20.53 | 3103.21 |
| 20.54 | 3259.24 |
| 20.55 | 2947.18 |
| 20.56 | 3051.2  |
| 20.57 | 2808.49 |
| 20.58 | 2583.12 |
| 20.59 | 2929.85 |
| 20.6  | 2496.44 |
| 20.61 | 2600.46 |
| 20.62 | 2565.78 |
| 20.63 | 2375.08 |
| 20.64 | 2600.46 |
| 20.65 | 2444.43 |
| 20.66 | 2236.39 |
| 20.67 | 2461.76 |
| 20.68 | 2149.71 |
| 20.69 | 2409.76 |
| 20.7  | 2271.06 |
| 20.71 | 2201.72 |
| 20.72 | 2132.37 |
| 20.73 | 2340.41 |
| 20.74 | 2167.05 |
| 20.75 | 2340.41 |
| 20.76 | 2288.4  |
| 20.77 | 2045.69 |

|       |         |
|-------|---------|
| 20.78 | 2184.38 |
| 20.79 | 2288.4  |
| 20.8  | 2184.38 |
| 20.81 | 2080.36 |
| 20.82 | 2132.37 |
| 20.83 | 2011.02 |
| 20.84 | 2115.04 |
| 20.85 | 2323.07 |
| 20.86 | 2028.36 |
| 20.87 | 2149.71 |
| 20.88 | 2149.71 |
| 20.89 | 2011.02 |
| 20.9  | 1854.99 |
| 20.91 | 2184.38 |
| 20.92 | 1750.97 |
| 20.93 | 2028.36 |
| 20.94 | 2115.04 |
| 20.95 | 2357.75 |
| 20.96 | 1976.35 |
| 20.97 | 2305.74 |
| 20.98 | 2184.38 |
| 20.99 | 2132.37 |
| 21    | 2323.07 |
| 21.01 | 2323.07 |
| 21.02 | 2548.45 |
| 21.03 | 2028.36 |
| 21.04 | 2323.07 |
| 21.05 | 1993.68 |
| 21.06 | 2115.04 |
| 21.07 | 2565.78 |
| 21.08 | 2253.73 |
| 21.09 | 2167.05 |
| 21.1  | 1889.66 |
| 21.11 | 2201.72 |
| 21.12 | 2080.36 |
| 21.13 | 2288.4  |
| 21.14 | 2409.76 |
| 21.15 | 1959.01 |
| 21.16 | 1959.01 |
| 21.17 | 2149.71 |
| 21.18 | 2132.37 |
| 21.19 | 2115.04 |
| 21.2  | 1768.31 |
| 21.21 | 2045.69 |

|       |         |
|-------|---------|
| 21.22 | 2271.06 |
| 21.23 | 2219.06 |
| 21.24 | 2028.36 |
| 21.25 | 2184.38 |
| 21.26 | 2011.02 |
| 21.27 | 2323.07 |
| 21.28 | 2305.74 |
| 21.29 | 2149.71 |
| 21.3  | 2236.39 |
| 21.31 | 2288.4  |
| 21.32 | 1941.67 |
| 21.33 | 1941.67 |
| 21.34 | 2184.38 |
| 21.35 | 1802.98 |
| 21.36 | 1698.96 |
| 21.37 | 1907    |
| 21.38 | 1837.66 |
| 21.39 | 1698.96 |
| 21.4  | 1802.98 |
| 21.41 | 1837.66 |
| 21.42 | 1872.33 |
| 21.43 | 1698.96 |
| 21.44 | 2045.69 |
| 21.45 | 2340.41 |
| 21.46 | 2115.04 |
| 21.47 | 1837.66 |
| 21.48 | 1820.32 |
| 21.49 | 1768.31 |
| 21.5  | 2340.41 |
| 21.51 | 2184.38 |
| 21.52 | 2201.72 |
| 21.53 | 1959.01 |
| 21.54 | 2167.05 |
| 21.55 | 2045.69 |
| 21.56 | 2063.03 |
| 21.57 | 2167.05 |
| 21.58 | 2063.03 |
| 21.59 | 2011.02 |
| 21.6  | 2219.06 |
| 21.61 | 2149.71 |
| 21.62 | 1802.98 |
| 21.63 | 2028.36 |
| 21.64 | 2115.04 |
| 21.65 | 1716.3  |

|       |         |
|-------|---------|
| 21.66 | 2080.36 |
| 21.67 | 2097.7  |
| 21.68 | 2184.38 |
| 21.69 | 2184.38 |
| 21.7  | 2201.72 |
| 21.71 | 2167.05 |
| 21.72 | 2045.69 |
| 21.73 | 2011.02 |
| 21.74 | 2236.39 |
| 21.75 | 1889.66 |
| 21.76 | 2132.37 |
| 21.77 | 1872.33 |
| 21.78 | 2236.39 |
| 21.79 | 1837.66 |
| 21.8  | 1976.35 |
| 21.81 | 2097.7  |
| 21.82 | 2288.4  |
| 21.83 | 2253.73 |
| 21.84 | 1941.67 |
| 21.85 | 1837.66 |
| 21.86 | 1907    |
| 21.87 | 1802.98 |
| 21.88 | 2167.05 |
| 21.89 | 2028.36 |
| 21.9  | 1993.68 |
| 21.91 | 2149.71 |
| 21.92 | 2097.7  |
| 21.93 | 2097.7  |
| 21.94 | 1594.95 |
| 21.95 | 2045.69 |
| 21.96 | 1907    |
| 21.97 | 2149.71 |
| 21.98 | 1907    |
| 21.99 | 1941.67 |
| 22    | 2097.7  |
| 22.01 | 1976.35 |
| 22.02 | 2028.36 |
| 22.03 | 1993.68 |
| 22.04 | 2011.02 |
| 22.05 | 1941.67 |
| 22.06 | 1820.32 |
| 22.07 | 1716.3  |
| 22.08 | 2080.36 |
| 22.09 | 1941.67 |

|       |         |
|-------|---------|
| 22.1  | 2045.69 |
| 22.11 | 2115.04 |
| 22.12 | 2132.37 |
| 22.13 | 1993.68 |
| 22.14 | 2375.08 |
| 22.15 | 2184.38 |
| 22.16 | 1907    |
| 22.17 | 1837.66 |
| 22.18 | 1959.01 |
| 22.19 | 2011.02 |
| 22.2  | 2028.36 |
| 22.21 | 2115.04 |
| 22.22 | 1907    |
| 22.23 | 2115.04 |
| 22.24 | 2115.04 |
| 22.25 | 2115.04 |
| 22.26 | 1924.34 |
| 22.27 | 2167.05 |
| 22.28 | 2080.36 |
| 22.29 | 1959.01 |
| 22.3  | 1716.3  |
| 22.31 | 1889.66 |
| 22.32 | 2097.7  |
| 22.33 | 2011.02 |
| 22.34 | 2219.06 |
| 22.35 | 1802.98 |
| 22.36 | 2080.36 |
| 22.37 | 1889.66 |
| 22.38 | 1993.68 |
| 22.39 | 1993.68 |
| 22.4  | 1837.66 |
| 22.41 | 1924.34 |
| 22.42 | 1907    |
| 22.43 | 2011.02 |
| 22.44 | 2149.71 |
| 22.45 | 1924.34 |
| 22.46 | 1941.67 |
| 22.47 | 1872.33 |
| 22.48 | 2167.05 |
| 22.49 | 2323.07 |
| 22.5  | 2063.03 |
| 22.51 | 2201.72 |
| 22.52 | 1976.35 |
| 22.53 | 1681.63 |



|       |         |
|-------|---------|
| 22.54 | 2271.06 |
| 22.55 | 2201.72 |
| 22.56 | 1941.67 |
| 22.57 | 2063.03 |
| 22.58 | 2149.71 |
| 22.59 | 2080.36 |
| 22.6  | 2219.06 |
| 22.61 | 1993.68 |
| 22.62 | 1837.66 |
| 22.63 | 2201.72 |
| 22.64 | 2115.04 |
| 22.65 | 2167.05 |
| 22.66 | 1993.68 |
| 22.67 | 2011.02 |
| 22.68 | 2357.75 |
| 22.69 | 1820.32 |
| 22.7  | 1976.35 |
| 22.71 | 2167.05 |
| 22.72 | 2115.04 |
| 22.73 | 2219.06 |
| 22.74 | 2461.76 |
| 22.75 | 2323.07 |
| 22.76 | 2357.75 |
| 22.77 | 2149.71 |
| 22.78 | 1976.35 |
| 22.79 | 2375.08 |
| 22.8  | 2045.69 |
| 22.81 | 2011.02 |
| 22.82 | 2149.71 |
| 22.83 | 2323.07 |
| 22.84 | 2357.75 |
| 22.85 | 2028.36 |
| 22.86 | 2340.41 |
| 22.87 | 2375.08 |
| 22.88 | 2236.39 |
| 22.89 | 2513.77 |
| 22.9  | 2808.49 |
| 22.91 | 2617.79 |
| 22.92 | 2635.13 |
| 22.93 | 2357.75 |
| 22.94 | 2600.46 |
| 22.95 | 2444.43 |
| 22.96 | 3051.2  |
| 22.97 | 2669.8  |

|       |         |
|-------|---------|
| 22.98 | 2912.51 |
| 22.99 | 2825.83 |
| 23    | 3172.56 |
| 23.01 | 2825.83 |
| 23.02 | 3172.56 |
| 23.03 | 3051.2  |
| 23.04 | 3501.95 |
| 23.05 | 4212.74 |
| 23.06 | 3935.36 |
| 23.07 | 4074.05 |
| 23.08 | 4594.14 |
| 23.09 | 4784.84 |
| 23.1  | 5131.57 |
| 23.11 | 5356.94 |
| 23.12 | 5703.67 |
| 23.13 | 6154.41 |
| 23.14 | 6674.5  |
| 23.15 | 7125.25 |
| 23.16 | 7645.34 |
| 23.17 | 8442.81 |
| 23.18 | 8945.57 |
| 23.19 | 8858.89 |
| 23.2  | 10020.4 |
| 23.21 | 9483    |
| 23.22 | 9881.73 |
| 23.23 | 10072.4 |
| 23.24 | 10263.1 |
| 23.25 | 11268.6 |
| 23.26 | 11736.7 |
| 23.27 | 11927.4 |
| 23.28 | 12326.2 |
| 23.29 | 12534.2 |
| 23.3  | 12430.2 |
| 23.31 | 12412.8 |
| 23.32 | 12620.9 |
| 23.33 | 11407.3 |
| 23.34 | 10991.3 |
| 23.35 | 10020.4 |
| 23.36 | 9552.34 |
| 23.37 | 8737.53 |
| 23.38 | 7385.29 |
| 23.39 | 6934.55 |
| 23.4  | 6691.84 |
| 23.41 | 5842.36 |

|       |         |
|-------|---------|
| 23.42 | 5322.27 |
| 23.43 | 4646.15 |
| 23.44 | 4126.06 |
| 23.45 | 3744.66 |
| 23.46 | 3900.68 |
| 23.47 | 3328.58 |
| 23.48 | 3033.86 |
| 23.49 | 2860.5  |
| 23.5  | 2895.17 |
| 23.51 | 2895.17 |
| 23.52 | 2860.5  |
| 23.53 | 2843.16 |
| 23.54 | 2323.07 |
| 23.55 | 2271.06 |
| 23.56 | 2531.11 |
| 23.57 | 2288.4  |
| 23.58 | 2167.05 |
| 23.59 | 2392.42 |
| 23.6  | 2201.72 |
| 23.61 | 2011.02 |
| 23.62 | 2184.38 |
| 23.63 | 2305.74 |
| 23.64 | 2201.72 |
| 23.65 | 1976.35 |
| 23.66 | 1907    |
| 23.67 | 1785.65 |
| 23.68 | 2288.4  |
| 23.69 | 2011.02 |
| 23.7  | 2132.37 |
| 23.71 | 2080.36 |
| 23.72 | 1993.68 |
| 23.73 | 2288.4  |
| 23.74 | 1959.01 |
| 23.75 | 2080.36 |
| 23.76 | 1924.34 |
| 23.77 | 2357.75 |
| 23.78 | 2427.09 |
| 23.79 | 2080.36 |
| 23.8  | 2080.36 |
| 23.81 | 2392.42 |
| 23.82 | 2253.73 |
| 23.83 | 2132.37 |
| 23.84 | 2167.05 |
| 23.85 | 2167.05 |

|       |         |
|-------|---------|
| 23.86 | 2219.06 |
| 23.87 | 2219.06 |
| 23.88 | 1872.33 |
| 23.89 | 1854.99 |
| 23.9  | 1820.32 |
| 23.91 | 1941.67 |
| 23.92 | 2011.02 |
| 23.93 | 1854.99 |
| 23.94 | 2115.04 |
| 23.95 | 2097.7  |
| 23.96 | 2063.03 |
| 23.97 | 1785.65 |
| 23.98 | 2201.72 |
| 23.99 | 1993.68 |
| 24    | 1941.67 |
| 24.01 | 1993.68 |
| 24.02 | 1924.34 |
| 24.03 | 2097.7  |
| 24.04 | 2045.69 |
| 24.05 | 1907    |
| 24.06 | 2236.39 |
| 24.07 | 1560.27 |
| 24.08 | 2253.73 |
| 24.09 | 2045.69 |
| 24.1  | 1941.67 |
| 24.11 | 1889.66 |
| 24.12 | 2028.36 |
| 24.13 | 1820.32 |
| 24.14 | 2063.03 |
| 24.15 | 1629.62 |
| 24.16 | 2115.04 |
| 24.17 | 2063.03 |
| 24.18 | 1750.97 |
| 24.19 | 1854.99 |
| 24.2  | 2115.04 |
| 24.21 | 2011.02 |
| 24.22 | 1837.66 |
| 24.23 | 1941.67 |
| 24.24 | 2167.05 |
| 24.25 | 1664.29 |
| 24.26 | 1976.35 |
| 24.27 | 1802.98 |
| 24.28 | 2063.03 |
| 24.29 | 1907    |

|       |         |
|-------|---------|
| 24.3  | 2253.73 |
| 24.31 | 2063.03 |
| 24.32 | 2011.02 |
| 24.33 | 1941.67 |
| 24.34 | 2219.06 |
| 24.35 | 1959.01 |
| 24.36 | 1889.66 |
| 24.37 | 1959.01 |
| 24.38 | 2132.37 |
| 24.39 | 2184.38 |
| 24.4  | 1854.99 |
| 24.41 | 2097.7  |
| 24.42 | 1854.99 |
| 24.43 | 1959.01 |
| 24.44 | 2288.4  |
| 24.45 | 1889.66 |
| 24.46 | 1924.34 |
| 24.47 | 1872.33 |
| 24.48 | 2149.71 |
| 24.49 | 2149.71 |
| 24.5  | 1976.35 |
| 24.51 | 2149.71 |
| 24.52 | 2253.73 |
| 24.53 | 1959.01 |
| 24.54 | 2011.02 |
| 24.55 | 2236.39 |
| 24.56 | 2011.02 |
| 24.57 | 1907    |
| 24.58 | 2115.04 |
| 24.59 | 1768.31 |
| 24.6  | 1941.67 |
| 24.61 | 2028.36 |
| 24.62 | 2149.71 |
| 24.63 | 1854.99 |
| 24.64 | 2028.36 |
| 24.65 | 2115.04 |
| 24.66 | 2184.38 |
| 24.67 | 1907    |
| 24.68 | 1924.34 |
| 24.69 | 1976.35 |
| 24.7  | 1837.66 |
| 24.71 | 1872.33 |
| 24.72 | 1993.68 |
| 24.73 | 2115.04 |

|       |         |
|-------|---------|
| 24.74 | 1889.66 |
| 24.75 | 2080.36 |
| 24.76 | 1924.34 |
| 24.77 | 1993.68 |
| 24.78 | 1976.35 |
| 24.79 | 1802.98 |
| 24.8  | 1889.66 |
| 24.81 | 1785.65 |
| 24.82 | 2115.04 |
| 24.83 | 2063.03 |
| 24.84 | 2115.04 |
| 24.85 | 1924.34 |
| 24.86 | 2080.36 |
| 24.87 | 2184.38 |
| 24.88 | 1959.01 |
| 24.89 | 1681.63 |
| 24.9  | 2305.74 |
| 24.91 | 2167.05 |
| 24.92 | 2357.75 |
| 24.93 | 2149.71 |
| 24.94 | 2149.71 |
| 24.95 | 1854.99 |
| 24.96 | 2201.72 |
| 24.97 | 1889.66 |
| 24.98 | 2063.03 |
| 24.99 | 2149.71 |
| 25    | 1733.64 |
| 25.01 | 2063.03 |
| 25.02 | 1820.32 |
| 25.03 | 2149.71 |
| 25.04 | 1768.31 |
| 25.05 | 2184.38 |
| 25.06 | 2045.69 |
| 25.07 | 2115.04 |
| 25.08 | 1976.35 |
| 25.09 | 2097.7  |
| 25.1  | 2097.7  |
| 25.11 | 1993.68 |
| 25.12 | 2201.72 |
| 25.13 | 1993.68 |
| 25.14 | 2271.06 |
| 25.15 | 1889.66 |
| 25.16 | 2184.38 |
| 25.17 | 1993.68 |

|       |         |
|-------|---------|
| 25.18 | 1854.99 |
| 25.19 | 2167.05 |
| 25.2  | 1750.97 |
| 25.21 | 2028.36 |
| 25.22 | 1820.32 |
| 25.23 | 2201.72 |
| 25.24 | 2288.4  |
| 25.25 | 1941.67 |
| 25.26 | 1802.98 |
| 25.27 | 2167.05 |
| 25.28 | 1854.99 |
| 25.29 | 1924.34 |
| 25.3  | 1993.68 |
| 25.31 | 2045.69 |
| 25.32 | 1872.33 |
| 25.33 | 2219.06 |
| 25.34 | 1681.63 |
| 25.35 | 1820.32 |
| 25.36 | 1941.67 |
| 25.37 | 1872.33 |
| 25.38 | 1594.95 |
| 25.39 | 1698.96 |
| 25.4  | 1872.33 |
| 25.41 | 1854.99 |
| 25.42 | 2028.36 |
| 25.43 | 1907    |
| 25.44 | 1907    |
| 25.45 | 1820.32 |
| 25.46 | 2184.38 |
| 25.47 | 2149.71 |
| 25.48 | 1907    |
| 25.49 | 1681.63 |
| 25.5  | 1768.31 |
| 25.51 | 1959.01 |
| 25.52 | 1924.34 |
| 25.53 | 1802.98 |
| 25.54 | 2288.4  |
| 25.55 | 1959.01 |
| 25.56 | 2236.39 |
| 25.57 | 1924.34 |
| 25.58 | 1525.6  |
| 25.59 | 2115.04 |
| 25.6  | 1976.35 |
| 25.61 | 2080.36 |

|       |         |
|-------|---------|
| 25.62 | 2097.7  |
| 25.63 | 1854.99 |
| 25.64 | 1820.32 |
| 25.65 | 1941.67 |
| 25.66 | 1872.33 |
| 25.67 | 1889.66 |
| 25.68 | 1959.01 |
| 25.69 | 2115.04 |
| 25.7  | 1854.99 |
| 25.71 | 1976.35 |
| 25.72 | 1993.68 |
| 25.73 | 1976.35 |
| 25.74 | 1889.66 |
| 25.75 | 2011.02 |
| 25.76 | 1854.99 |
| 25.77 | 1785.65 |
| 25.78 | 1976.35 |
| 25.79 | 1889.66 |
| 25.8  | 2063.03 |
| 25.81 | 2288.4  |
| 25.82 | 1907    |
| 25.83 | 1941.67 |
| 25.84 | 2011.02 |
| 25.85 | 2253.73 |
| 25.86 | 1854.99 |
| 25.87 | 2149.71 |
| 25.88 | 2323.07 |
| 25.89 | 2097.7  |
| 25.9  | 1941.67 |
| 25.91 | 1907    |
| 25.92 | 1872.33 |
| 25.93 | 2427.09 |
| 25.94 | 2288.4  |
| 25.95 | 2340.41 |
| 25.96 | 2600.46 |
| 25.97 | 2253.73 |
| 25.98 | 2201.72 |
| 25.99 | 2479.1  |
| 26    | 2479.1  |
| 26.01 | 2531.11 |
| 26.02 | 2167.05 |
| 26.03 | 2375.08 |
| 26.04 | 2357.75 |
| 26.05 | 2357.75 |



|       |         |
|-------|---------|
| 26.06 | 2323.07 |
| 26.07 | 2583.12 |
| 26.08 | 2513.77 |
| 26.09 | 2496.44 |
| 26.1  | 2635.13 |
| 26.11 | 2912.51 |
| 26.12 | 2548.45 |
| 26.13 | 2479.1  |
| 26.14 | 2496.44 |
| 26.15 | 2201.72 |
| 26.16 | 2340.41 |
| 26.17 | 2236.39 |
| 26.18 | 2167.05 |
| 26.19 | 1941.67 |
| 26.2  | 2167.05 |
| 26.21 | 2305.74 |
| 26.22 | 2063.03 |
| 26.23 | 2149.71 |
| 26.24 | 2028.36 |
| 26.25 | 2305.74 |
| 26.26 | 2097.7  |
| 26.27 | 2340.41 |
| 26.28 | 2167.05 |
| 26.29 | 1993.68 |
| 26.3  | 2011.02 |
| 26.31 | 1907    |
| 26.32 | 1993.68 |
| 26.33 | 1733.64 |
| 26.34 | 1941.67 |
| 26.35 | 2219.06 |
| 26.36 | 1872.33 |
| 26.37 | 2045.69 |
| 26.38 | 1993.68 |
| 26.39 | 2271.06 |
| 26.4  | 2184.38 |
| 26.41 | 1941.67 |
| 26.42 | 2288.4  |
| 26.43 | 2167.05 |
| 26.44 | 2253.73 |
| 26.45 | 2149.71 |
| 26.46 | 2149.71 |
| 26.47 | 2479.1  |
| 26.48 | 2201.72 |
| 26.49 | 2635.13 |

|       |         |
|-------|---------|
| 26.5  | 2097.7  |
| 26.51 | 2201.72 |
| 26.52 | 2063.03 |
| 26.53 | 2375.08 |
| 26.54 | 1959.01 |
| 26.55 | 2184.38 |
| 26.56 | 2080.36 |
| 26.57 | 2236.39 |
| 26.58 | 2600.46 |
| 26.59 | 2548.45 |
| 26.6  | 2704.47 |
| 26.61 | 2479.1  |
| 26.62 | 2652.46 |
| 26.63 | 2964.52 |
| 26.64 | 2825.83 |
| 26.65 | 2704.47 |
| 26.66 | 2981.86 |
| 26.67 | 2981.86 |
| 26.68 | 2375.08 |
| 26.69 | 2739.15 |
| 26.7  | 2981.86 |
| 26.71 | 2860.5  |
| 26.72 | 2791.16 |
| 26.73 | 3120.55 |
| 26.74 | 2721.81 |
| 26.75 | 3415.26 |
| 26.76 | 3415.26 |
| 26.77 | 3103.21 |
| 26.78 | 2999.19 |
| 26.79 | 3016.53 |
| 26.8  | 2877.84 |
| 26.81 | 2479.1  |
| 26.82 | 2409.76 |
| 26.83 | 2375.08 |
| 26.84 | 2219.06 |
| 26.85 | 2288.4  |
| 26.86 | 2219.06 |
| 26.87 | 2080.36 |
| 26.88 | 2357.75 |
| 26.89 | 2045.69 |
| 26.9  | 2288.4  |
| 26.91 | 2097.7  |
| 26.92 | 2201.72 |
| 26.93 | 2253.73 |

|       |         |
|-------|---------|
| 26.94 | 2149.71 |
| 26.95 | 2011.02 |
| 26.96 | 1889.66 |
| 26.97 | 2028.36 |
| 26.98 | 2149.71 |
| 26.99 | 2097.7  |
| 27    | 2323.07 |
| 27.01 | 1820.32 |
| 27.02 | 1768.31 |
| 27.03 | 1768.31 |
| 27.04 | 1716.3  |
| 27.05 | 1976.35 |
| 27.06 | 2132.37 |
| 27.07 | 2132.37 |
| 27.08 | 2253.73 |
| 27.09 | 1959.01 |
| 27.1  | 1907    |
| 27.11 | 2028.36 |
| 27.12 | 1924.34 |
| 27.13 | 1768.31 |
| 27.14 | 2132.37 |
| 27.15 | 1820.32 |
| 27.16 | 1907    |
| 27.17 | 1872.33 |
| 27.18 | 1612.28 |
| 27.19 | 1733.64 |
| 27.2  | 2097.7  |
| 27.21 | 1837.66 |
| 27.22 | 1976.35 |
| 27.23 | 1993.68 |
| 27.24 | 1907    |
| 27.25 | 2132.37 |
| 27.26 | 2184.38 |
| 27.27 | 2132.37 |
| 27.28 | 1993.68 |
| 27.29 | 1594.95 |
| 27.3  | 1889.66 |
| 27.31 | 2063.03 |
| 27.32 | 1820.32 |
| 27.33 | 1802.98 |
| 27.34 | 2028.36 |
| 27.35 | 1733.64 |
| 27.36 | 2045.69 |
| 27.37 | 1820.32 |

|       |         |
|-------|---------|
| 27.38 | 2080.36 |
| 27.39 | 2132.37 |
| 27.4  | 1785.65 |
| 27.41 | 1872.33 |
| 27.42 | 1993.68 |
| 27.43 | 1993.68 |
| 27.44 | 1889.66 |
| 27.45 | 1941.67 |
| 27.46 | 1993.68 |
| 27.47 | 1802.98 |
| 27.48 | 2028.36 |
| 27.49 | 1941.67 |
| 27.5  | 1941.67 |
| 27.51 | 2080.36 |
| 27.52 | 1820.32 |
| 27.53 | 1698.96 |
| 27.54 | 2063.03 |
| 27.55 | 2236.39 |
| 27.56 | 1959.01 |
| 27.57 | 1993.68 |
| 27.58 | 1560.27 |
| 27.59 | 1872.33 |
| 27.6  | 1889.66 |
| 27.61 | 1976.35 |
| 27.62 | 1993.68 |
| 27.63 | 1959.01 |
| 27.64 | 1907    |
| 27.65 | 2184.38 |
| 27.66 | 1854.99 |
| 27.67 | 1907    |
| 27.68 | 1750.97 |
| 27.69 | 1924.34 |
| 27.7  | 1854.99 |
| 27.71 | 1750.97 |
| 27.72 | 2063.03 |
| 27.73 | 1785.65 |
| 27.74 | 1837.66 |
| 27.75 | 1837.66 |
| 27.76 | 1924.34 |
| 27.77 | 1820.32 |
| 27.78 | 2045.69 |
| 27.79 | 2340.41 |
| 27.8  | 2219.06 |
| 27.81 | 2149.71 |

|       |         |
|-------|---------|
| 27.82 | 1993.68 |
| 27.83 | 1976.35 |
| 27.84 | 1716.3  |
| 27.85 | 2011.02 |
| 27.86 | 1837.66 |
| 27.87 | 1993.68 |
| 27.88 | 1820.32 |
| 27.89 | 2097.7  |
| 27.9  | 1750.97 |
| 27.91 | 1785.65 |
| 27.92 | 1560.27 |
| 27.93 | 1733.64 |
| 27.94 | 1976.35 |
| 27.95 | 1854.99 |
| 27.96 | 1785.65 |
| 27.97 | 2063.03 |
| 27.98 | 1889.66 |
| 27.99 | 1820.32 |
| 28    | 2080.36 |
| 28.01 | 2011.02 |
| 28.02 | 1959.01 |
| 28.03 | 1629.62 |
| 28.04 | 2011.02 |
| 28.05 | 1785.65 |
| 28.06 | 1959.01 |
| 28.07 | 1993.68 |
| 28.08 | 1889.66 |
| 28.09 | 1716.3  |
| 28.1  | 1646.96 |
| 28.11 | 1872.33 |
| 28.12 | 1629.62 |
| 28.13 | 2080.36 |
| 28.14 | 2080.36 |
| 28.15 | 2184.38 |
| 28.16 | 2028.36 |
| 28.17 | 1750.97 |
| 28.18 | 1837.66 |
| 28.19 | 1941.67 |
| 28.2  | 1976.35 |
| 28.21 | 1802.98 |
| 28.22 | 2236.39 |
| 28.23 | 1907    |
| 28.24 | 2201.72 |
| 28.25 | 2063.03 |

|       |         |
|-------|---------|
| 28.26 | 2201.72 |
| 28.27 | 2167.05 |
| 28.28 | 2132.37 |
| 28.29 | 1837.66 |
| 28.3  | 2011.02 |
| 28.31 | 2097.7  |
| 28.32 | 2097.7  |
| 28.33 | 2323.07 |
| 28.34 | 1907    |
| 28.35 | 2305.74 |
| 28.36 | 1941.67 |
| 28.37 | 1872.33 |
| 28.38 | 2357.75 |
| 28.39 | 2097.7  |
| 28.4  | 2063.03 |
| 28.41 | 2219.06 |
| 28.42 | 2253.73 |
| 28.43 | 2409.76 |
| 28.44 | 2097.7  |
| 28.45 | 1924.34 |
| 28.46 | 2427.09 |
| 28.47 | 2409.76 |
| 28.48 | 2253.73 |
| 28.49 | 2357.75 |
| 28.5  | 2479.1  |
| 28.51 | 2409.76 |
| 28.52 | 2513.77 |
| 28.53 | 2236.39 |
| 28.54 | 2392.42 |
| 28.55 | 2479.1  |
| 28.56 | 2461.76 |
| 28.57 | 2288.4  |
| 28.58 | 2392.42 |
| 28.59 | 2600.46 |
| 28.6  | 2548.45 |
| 28.61 | 2513.77 |
| 28.62 | 2756.48 |
| 28.63 | 2496.44 |
| 28.64 | 3224.56 |
| 28.65 | 2739.15 |
| 28.66 | 2895.17 |
| 28.67 | 2635.13 |
| 28.68 | 2895.17 |
| 28.69 | 2843.16 |

|       |         |
|-------|---------|
| 28.7  | 2981.86 |
| 28.71 | 2808.49 |
| 28.72 | 2964.52 |
| 28.73 | 2843.16 |
| 28.74 | 2773.82 |
| 28.75 | 3363.26 |
| 28.76 | 2912.51 |
| 28.77 | 3172.56 |
| 28.78 | 3103.21 |
| 28.79 | 2773.82 |
| 28.8  | 2912.51 |
| 28.81 | 2565.78 |
| 28.82 | 3051.2  |
| 28.83 | 2756.48 |
| 28.84 | 3207.23 |
| 28.85 | 2877.84 |
| 28.86 | 2791.16 |
| 28.87 | 2808.49 |
| 28.88 | 3241.9  |
| 28.89 | 2652.46 |
| 28.9  | 2912.51 |
| 28.91 | 3085.87 |
| 28.92 | 2964.52 |
| 28.93 | 3033.86 |
| 28.94 | 3172.56 |
| 28.95 | 2912.51 |
| 28.96 | 3189.89 |
| 28.97 | 3207.23 |
| 28.98 | 3553.96 |
| 28.99 | 3068.54 |
| 29    | 3397.93 |
| 29.01 | 3501.95 |
| 29.02 | 3293.91 |
| 29.03 | 3571.29 |
| 29.04 | 3397.93 |
| 29.05 | 3727.32 |
| 29.06 | 3796.67 |
| 29.07 | 3553.96 |
| 29.08 | 3449.94 |
| 29.09 | 3519.28 |
| 29.1  | 3536.62 |
| 29.11 | 3675.31 |
| 29.12 | 3796.67 |
| 29.13 | 3848.67 |

|       |         |
|-------|---------|
| 29.14 | 3605.97 |
| 29.15 | 4351.43 |
| 29.16 | 4542.13 |
| 29.17 | 4680.82 |
| 29.18 | 4420.77 |
| 29.19 | 4767.5  |
| 29.2  | 4732.83 |
| 29.21 | 5443.62 |
| 29.22 | 5773.01 |
| 29.23 | 6206.42 |
| 29.24 | 6431.79 |
| 29.25 | 6327.78 |
| 29.26 | 7125.25 |
| 29.27 | 7211.93 |
| 29.28 | 8494.82 |
| 29.29 | 8304.12 |
| 29.3  | 9049.58 |
| 29.31 | 9552.34 |
| 29.32 | 10991.3 |
| 29.33 | 11355.3 |
| 29.34 | 12516.9 |
| 29.35 | 13955.8 |
| 29.36 | 15880.1 |
| 29.37 | 16348.2 |
| 29.38 | 17111   |
| 29.39 | 19503.4 |
| 29.4  | 21566.4 |
| 29.41 | 23369.4 |
| 29.42 | 26091.2 |
| 29.43 | 29991.9 |
| 29.44 | 31292.1 |
| 29.45 | 36319.7 |
| 29.46 | 39318.9 |
| 29.47 | 44329.1 |
| 29.48 | 47796.4 |
| 29.49 | 51107.6 |
| 29.5  | 56655.3 |
| 29.51 | 61526.8 |
| 29.52 | 67785.2 |
| 29.53 | 73540.9 |
| 29.54 | 79799.3 |
| 29.55 | 84618.8 |
| 29.56 | 93356.4 |
| 29.57 | 98834.6 |



|       |         |
|-------|---------|
| 29.58 | 106723  |
| 29.59 | 112981  |
| 29.6  | 120106  |
| 29.61 | 131219  |
| 29.62 | 135986  |
| 29.63 | 142418  |
| 29.64 | 142193  |
| 29.65 | 143337  |
| 29.66 | 138258  |
| 29.67 | 135588  |
| 29.68 | 127752  |
| 29.69 | 118737  |
| 29.7  | 108266  |
| 29.71 | 99094.7 |
| 29.72 | 89178.3 |
| 29.73 | 80319.4 |
| 29.74 | 70333.7 |
| 29.75 | 63208.4 |
| 29.76 | 56898   |
| 29.77 | 49183.3 |
| 29.78 | 41711.3 |
| 29.79 | 36111.7 |
| 29.8  | 31569.5 |
| 29.81 | 26056.6 |
| 29.82 | 23976.2 |
| 29.83 | 20612.9 |
| 29.84 | 18584.6 |
| 29.85 | 17319   |
| 29.86 | 16400.2 |
| 29.87 | 14857.3 |
| 29.88 | 14059.8 |
| 29.89 | 11650   |
| 29.9  | 11476.7 |
| 29.91 | 10540.5 |
| 29.92 | 9552.34 |
| 29.93 | 8876.22 |
| 29.94 | 9760.38 |
| 29.95 | 8564.17 |
| 29.96 | 7801.37 |
| 29.97 | 7801.37 |
| 29.98 | 7038.57 |
| 29.99 | 6639.83 |
| 30    | 6050.39 |
| 30.01 | 6293.1  |

|       |         |
|-------|---------|
| 30.02 | 5721    |
| 30.03 | 5911.7  |
| 30.04 | 5738.34 |
| 30.05 | 5530.3  |
| 30.06 | 5408.95 |
| 30.07 | 4958.2  |
| 30.08 | 5304.93 |
| 30.09 | 4992.87 |
| 30.1  | 4247.41 |
| 30.11 | 4420.77 |
| 30.12 | 4732.83 |
| 30.13 | 4680.82 |
| 30.14 | 3900.68 |
| 30.15 | 3900.68 |
| 30.16 | 3831.34 |
| 30.17 | 4022.04 |
| 30.18 | 4299.42 |
| 30.19 | 4091.38 |
| 30.2  | 4628.81 |
| 30.21 | 4108.72 |
| 30.22 | 3432.6  |
| 30.23 | 3675.31 |
| 30.24 | 3692.65 |
| 30.25 | 3883.35 |
| 30.26 | 3553.96 |
| 30.27 | 3311.25 |
| 30.28 | 3103.21 |
| 30.29 | 3189.89 |
| 30.3  | 3449.94 |
| 30.31 | 3137.88 |
| 30.32 | 3207.23 |
| 30.33 | 3103.21 |
| 30.34 | 2999.19 |
| 30.35 | 3155.22 |
| 30.36 | 2947.18 |
| 30.37 | 2981.86 |
| 30.38 | 2877.84 |
| 30.39 | 2843.16 |
| 30.4  | 2999.19 |
| 30.41 | 2825.83 |
| 30.42 | 2947.18 |
| 30.43 | 2756.48 |
| 30.44 | 2773.82 |
| 30.45 | 2912.51 |

|       |         |
|-------|---------|
| 30.46 | 2877.84 |
| 30.47 | 2548.45 |
| 30.48 | 2999.19 |
| 30.49 | 2739.15 |
| 30.5  | 2496.44 |
| 30.51 | 2461.76 |
| 30.52 | 2808.49 |
| 30.53 | 3068.54 |
| 30.54 | 2947.18 |
| 30.55 | 2843.16 |
| 30.56 | 3207.23 |
| 30.57 | 3241.9  |
| 30.58 | 2756.48 |
| 30.59 | 3501.95 |
| 30.6  | 3051.2  |
| 30.61 | 2947.18 |
| 30.62 | 2964.52 |
| 30.63 | 3363.26 |
| 30.64 | 3397.93 |
| 30.65 | 3103.21 |
| 30.66 | 3796.67 |
| 30.67 | 3536.62 |
| 30.68 | 3796.67 |
| 30.69 | 3727.32 |
| 30.7  | 3952.69 |
| 30.71 | 3883.35 |
| 30.72 | 4091.38 |
| 30.73 | 4056.71 |
| 30.74 | 4420.77 |
| 30.75 | 4091.38 |
| 30.76 | 4576.8  |
| 30.77 | 4732.83 |
| 30.78 | 4750.17 |
| 30.79 | 4143.39 |
| 30.8  | 4611.47 |
| 30.81 | 5339.6  |
| 30.82 | 4680.82 |
| 30.83 | 4490.12 |
| 30.84 | 4559.47 |
| 30.85 | 3692.65 |
| 30.86 | 3397.93 |
| 30.87 | 3553.96 |
| 30.88 | 3831.34 |
| 30.89 | 3709.98 |

|       |         |
|-------|---------|
| 30.9  | 3259.24 |
| 30.91 | 3311.25 |
| 30.92 | 2808.49 |
| 30.93 | 2583.12 |
| 30.94 | 2565.78 |
| 30.95 | 2461.76 |
| 30.96 | 2617.79 |
| 30.97 | 2531.11 |
| 30.98 | 2669.8  |
| 30.99 | 2357.75 |
| 31    | 2392.42 |
| 31.01 | 2565.78 |
| 31.02 | 2271.06 |
| 31.03 | 2409.76 |
| 31.04 | 2045.69 |
| 31.05 | 2340.41 |
| 31.06 | 2236.39 |
| 31.07 | 2236.39 |
| 31.08 | 2565.78 |
| 31.09 | 2201.72 |
| 31.1  | 2080.36 |
| 31.11 | 2236.39 |
| 31.12 | 2513.77 |
| 31.13 | 2184.38 |
| 31.14 | 2444.43 |
| 31.15 | 2184.38 |
| 31.16 | 2479.1  |
| 31.17 | 2323.07 |
| 31.18 | 2427.09 |
| 31.19 | 2063.03 |
| 31.2  | 2115.04 |
| 31.21 | 2201.72 |
| 31.22 | 1924.34 |
| 31.23 | 2011.02 |
| 31.24 | 2149.71 |
| 31.25 | 2409.76 |
| 31.26 | 2427.09 |
| 31.27 | 2427.09 |
| 31.28 | 2011.02 |
| 31.29 | 1837.66 |
| 31.3  | 2427.09 |
| 31.31 | 2392.42 |
| 31.32 | 1993.68 |
| 31.33 | 2184.38 |

31.34 1872.33  
31.35 2253.73  
31.36 2149.71  
31.37 2201.72  
31.38 2323.07  
31.39 2496.44  
31.4 2513.77  
31.41 2461.76  
31.42 2513.77  
31.43 2617.79  
31.44 2444.43  
31.45 2756.48  
31.46 2947.18  
31.47 3068.54  
31.48 2947.18  
31.49 3051.2  
31.5 3120.55  
31.51 3519.28  
31.52 3259.24  
31.53 3311.25  
31.54 3675.31  
31.55 3918.02  
31.56 4091.38  
31.57 4039.37  
31.58 4351.43  
31.59 4507.46  
31.6 4715.49  
31.61 5114.23  
31.62 5322.27  
31.63 5582.31  
31.64 5356.94  
31.65 5790.35  
31.66 5946.38  
31.67 5599.65  
31.68 5859.69  
31.69 6067.73  
31.7 6067.73  
31.71 5807.68  
31.72 5166.24  
31.73 4732.83  
31.74 4195.4  
31.75 4490.12  
31.76 4143.39  
31.77 3900.68

|       |         |
|-------|---------|
| 31.78 | 4091.38 |
| 31.79 | 3709.98 |
| 31.8  | 3484.61 |
| 31.81 | 3553.96 |
| 31.82 | 3085.87 |
| 31.83 | 2912.51 |
| 31.84 | 2981.86 |
| 31.85 | 2773.82 |
| 31.86 | 2479.1  |
| 31.87 | 2201.72 |
| 31.88 | 2375.08 |
| 31.89 | 2531.11 |
| 31.9  | 2340.41 |
| 31.91 | 2132.37 |
| 31.92 | 2548.45 |
| 31.93 | 2219.06 |
| 31.94 | 2548.45 |
| 31.95 | 2461.76 |
| 31.96 | 2149.71 |
| 31.97 | 1802.98 |
| 31.98 | 2236.39 |
| 31.99 | 2097.7  |
| 32    | 2288.4  |
| 32.01 | 2184.38 |
| 32.02 | 1820.32 |
| 32.03 | 2132.37 |
| 32.04 | 2149.71 |
| 32.05 | 2028.36 |
| 32.06 | 2080.36 |
| 32.07 | 1733.64 |
| 32.08 | 1959.01 |
| 32.09 | 1785.65 |
| 32.1  | 1924.34 |
| 32.11 | 1768.31 |
| 32.12 | 1907    |
| 32.13 | 2063.03 |
| 32.14 | 1907    |
| 32.15 | 1716.3  |
| 32.16 | 1854.99 |
| 32.17 | 2115.04 |
| 32.18 | 2045.69 |
| 32.19 | 1716.3  |
| 32.2  | 2253.73 |
| 32.21 | 2045.69 |

|       |         |
|-------|---------|
| 32.22 | 2236.39 |
| 32.23 | 1612.28 |
| 32.24 | 1681.63 |
| 32.25 | 1907    |
| 32.26 | 2115.04 |
| 32.27 | 1907    |
| 32.28 | 2011.02 |
| 32.29 | 2028.36 |
| 32.3  | 2080.36 |
| 32.31 | 1750.97 |
| 32.32 | 1959.01 |
| 32.33 | 2184.38 |
| 32.34 | 1976.35 |
| 32.35 | 2115.04 |
| 32.36 | 2305.74 |
| 32.37 | 2392.42 |
| 32.38 | 2323.07 |
| 32.39 | 2097.7  |
| 32.4  | 2115.04 |
| 32.41 | 2305.74 |
| 32.42 | 2461.76 |
| 32.43 | 2323.07 |
| 32.44 | 2479.1  |
| 32.45 | 2080.36 |
| 32.46 | 2687.14 |
| 32.47 | 2479.1  |
| 32.48 | 2461.76 |
| 32.49 | 2669.8  |
| 32.5  | 2721.81 |
| 32.51 | 2531.11 |
| 32.52 | 2912.51 |
| 32.53 | 2773.82 |
| 32.54 | 2548.45 |
| 32.55 | 2877.84 |
| 32.56 | 2548.45 |
| 32.57 | 2652.46 |
| 32.58 | 2687.14 |
| 32.59 | 3137.88 |
| 32.6  | 3241.9  |
| 32.61 | 2877.84 |
| 32.62 | 2548.45 |
| 32.63 | 2843.16 |
| 32.64 | 3120.55 |
| 32.65 | 2600.46 |

|       |         |
|-------|---------|
| 32.66 | 2739.15 |
| 32.67 | 2583.12 |
| 32.68 | 2652.46 |
| 32.69 | 2548.45 |
| 32.7  | 2115.04 |
| 32.71 | 1820.32 |
| 32.72 | 2219.06 |
| 32.73 | 2045.69 |
| 32.74 | 2028.36 |
| 32.75 | 2409.76 |
| 32.76 | 1924.34 |
| 32.77 | 1959.01 |
| 32.78 | 2028.36 |
| 32.79 | 2115.04 |
| 32.8  | 1976.35 |
| 32.81 | 1646.96 |
| 32.82 | 1716.3  |
| 32.83 | 2011.02 |
| 32.84 | 1837.66 |
| 32.85 | 1577.61 |
| 32.86 | 2097.7  |
| 32.87 | 1924.34 |
| 32.88 | 1802.98 |
| 32.89 | 1612.28 |
| 32.9  | 1837.66 |
| 32.91 | 1854.99 |
| 32.92 | 1837.66 |
| 32.93 | 1993.68 |
| 32.94 | 1924.34 |
| 32.95 | 1941.67 |
| 32.96 | 1976.35 |
| 32.97 | 1837.66 |
| 32.98 | 1577.61 |
| 32.99 | 1404.25 |
| 33    | 1733.64 |
| 33.01 | 1820.32 |
| 33.02 | 2115.04 |
| 33.03 | 1716.3  |
| 33.04 | 1872.33 |
| 33.05 | 2028.36 |
| 33.06 | 1976.35 |
| 33.07 | 2028.36 |
| 33.08 | 1889.66 |
| 33.09 | 1976.35 |



33.1 1768.31  
33.11 2011.02  
33.12 1716.3  
33.13 1907  
33.14 1941.67  
33.15 1646.96  
33.16 1941.67  
33.17 1681.63  
33.18 1594.95  
33.19 2028.36  
33.2 1802.98  
33.21 1421.58  
33.22 1907  
33.23 1750.97  
33.24 1646.96  
33.25 1698.96  
33.26 1993.68  
33.27 1664.29  
33.28 1976.35  
33.29 1646.96  
33.3 1959.01  
33.31 1612.28  
33.32 1698.96  
33.33 1907  
33.34 1490.93  
33.35 1508.26  
33.36 1577.61  
33.37 1889.66  
33.38 1664.29  
33.39 1473.59  
33.4 1750.97  
33.41 1698.96  
33.42 1907  
33.43 1646.96  
33.44 1872.33  
33.45 1681.63  
33.46 1577.61  
33.47 1560.27  
33.48 1664.29  
33.49 1907  
33.5 1577.61  
33.51 1421.58  
33.52 1612.28  
33.53 1594.95

|       |         |
|-------|---------|
| 33.54 | 1646.96 |
| 33.55 | 1282.89 |
| 33.56 | 1785.65 |
| 33.57 | 1907    |
| 33.58 | 1681.63 |
| 33.59 | 1716.3  |
| 33.6  | 1802.98 |
| 33.61 | 1924.34 |
| 33.62 | 1612.28 |
| 33.63 | 1560.27 |
| 33.64 | 1664.29 |
| 33.65 | 1438.92 |
| 33.66 | 1646.96 |
| 33.67 | 1490.93 |
| 33.68 | 1629.62 |
| 33.69 | 1577.61 |
| 33.7  | 1664.29 |
| 33.71 | 1681.63 |
| 33.72 | 1802.98 |
| 33.73 | 1646.96 |
| 33.74 | 1577.61 |
| 33.75 | 1802.98 |
| 33.76 | 1820.32 |
| 33.77 | 1438.92 |
| 33.78 | 1802.98 |
| 33.79 | 1750.97 |
| 33.8  | 1594.95 |
| 33.81 | 1542.94 |
| 33.82 | 1681.63 |
| 33.83 | 1646.96 |
| 33.84 | 1560.27 |
| 33.85 | 2045.69 |
| 33.86 | 1837.66 |
| 33.87 | 1456.26 |
| 33.88 | 1508.26 |
| 33.89 | 1733.64 |
| 33.9  | 1698.96 |
| 33.91 | 1733.64 |
| 33.92 | 1577.61 |
| 33.93 | 1629.62 |
| 33.94 | 1525.6  |
| 33.95 | 1646.96 |
| 33.96 | 1698.96 |
| 33.97 | 1629.62 |

|       |         |
|-------|---------|
| 33.98 | 1872.33 |
| 33.99 | 1698.96 |
| 34    | 1681.63 |
| 34.01 | 1768.31 |
| 34.02 | 1612.28 |
| 34.03 | 1716.3  |
| 34.04 | 1664.29 |
| 34.05 | 1802.98 |
| 34.06 | 1976.35 |
| 34.07 | 1646.96 |
| 34.08 | 1525.6  |
| 34.09 | 1733.64 |
| 34.1  | 1785.65 |
| 34.11 | 1577.61 |
| 34.12 | 1473.59 |
| 34.13 | 1317.56 |
| 34.14 | 1733.64 |
| 34.15 | 1577.61 |
| 34.16 | 1542.94 |
| 34.17 | 1768.31 |
| 34.18 | 2045.69 |
| 34.19 | 1594.95 |
| 34.2  | 1490.93 |
| 34.21 | 1733.64 |
| 34.22 | 1542.94 |
| 34.23 | 1646.96 |
| 34.24 | 1369.57 |
| 34.25 | 1577.61 |
| 34.26 | 1421.58 |
| 34.27 | 1386.91 |
| 34.28 | 1560.27 |
| 34.29 | 1490.93 |
| 34.3  | 1820.32 |
| 34.31 | 1456.26 |
| 34.32 | 1924.34 |
| 34.33 | 1664.29 |
| 34.34 | 1716.3  |
| 34.35 | 1473.59 |
| 34.36 | 1525.6  |
| 34.37 | 1525.6  |
| 34.38 | 1421.58 |
| 34.39 | 1889.66 |
| 34.4  | 1438.92 |
| 34.41 | 1768.31 |

|       |         |
|-------|---------|
| 34.42 | 1594.95 |
| 34.43 | 1577.61 |
| 34.44 | 1456.26 |
| 34.45 | 1265.56 |
| 34.46 | 1785.65 |
| 34.47 | 1490.93 |
| 34.48 | 1421.58 |
| 34.49 | 1369.57 |
| 34.5  | 1282.89 |
| 34.51 | 1490.93 |
| 34.52 | 1594.95 |
| 34.53 | 1612.28 |
| 34.54 | 1854.99 |
| 34.55 | 1872.33 |
| 34.56 | 1560.27 |
| 34.57 | 1612.28 |
| 34.58 | 1386.91 |
| 34.59 | 1490.93 |
| 34.6  | 1490.93 |
| 34.61 | 1421.58 |
| 34.62 | 1750.97 |
| 34.63 | 1750.97 |
| 34.64 | 1698.96 |
| 34.65 | 1612.28 |
| 34.66 | 1612.28 |
| 34.67 | 1560.27 |
| 34.68 | 1369.57 |
| 34.69 | 1698.96 |
| 34.7  | 1698.96 |
| 34.71 | 2063.03 |
| 34.72 | 1629.62 |
| 34.73 | 1716.3  |
| 34.74 | 1629.62 |
| 34.75 | 1959.01 |
| 34.76 | 1889.66 |
| 34.77 | 1612.28 |
| 34.78 | 1612.28 |
| 34.79 | 1768.31 |
| 34.8  | 1768.31 |
| 34.81 | 1907    |
| 34.82 | 2305.74 |
| 34.83 | 1889.66 |
| 34.84 | 1750.97 |
| 34.85 | 1785.65 |

|       |         |
|-------|---------|
| 34.86 | 1924.34 |
| 34.87 | 2097.7  |
| 34.88 | 1854.99 |
| 34.89 | 1820.32 |
| 34.9  | 1733.64 |
| 34.91 | 1612.28 |
| 34.92 | 1681.63 |
| 34.93 | 1785.65 |
| 34.94 | 1854.99 |
| 34.95 | 1733.64 |
| 34.96 | 1716.3  |
| 34.97 | 1629.62 |
| 34.98 | 1698.96 |
| 34.99 | 1542.94 |
| 35    | 1508.26 |
| 35.01 | 1542.94 |
| 35.02 | 1386.91 |
| 35.03 | 1837.66 |
| 35.04 | 1733.64 |
| 35.05 | 1959.01 |
| 35.06 | 1872.33 |
| 35.07 | 1941.67 |
| 35.08 | 1646.96 |
| 35.09 | 1542.94 |
| 35.1  | 1456.26 |
| 35.11 | 1473.59 |
| 35.12 | 1802.98 |
| 35.13 | 1959.01 |
| 35.14 | 1473.59 |
| 35.15 | 1560.27 |
| 35.16 | 1542.94 |
| 35.17 | 1577.61 |
| 35.18 | 1924.34 |
| 35.19 | 2115.04 |
| 35.2  | 1733.64 |
| 35.21 | 1854.99 |
| 35.22 | 1837.66 |
| 35.23 | 1837.66 |
| 35.24 | 1959.01 |
| 35.25 | 1959.01 |
| 35.26 | 1785.65 |
| 35.27 | 1750.97 |
| 35.28 | 1698.96 |
| 35.29 | 1525.6  |

|       |         |
|-------|---------|
| 35.3  | 1889.66 |
| 35.31 | 1750.97 |
| 35.32 | 1854.99 |
| 35.33 | 2201.72 |
| 35.34 | 1959.01 |
| 35.35 | 1889.66 |
| 35.36 | 1629.62 |
| 35.37 | 1612.28 |
| 35.38 | 1907    |
| 35.39 | 1924.34 |
| 35.4  | 1854.99 |
| 35.41 | 1560.27 |
| 35.42 | 1664.29 |
| 35.43 | 1698.96 |
| 35.44 | 1820.32 |
| 35.45 | 1698.96 |
| 35.46 | 1404.25 |
| 35.47 | 1716.3  |
| 35.48 | 1872.33 |
| 35.49 | 1837.66 |
| 35.5  | 1542.94 |
| 35.51 | 1959.01 |
| 35.52 | 1681.63 |
| 35.53 | 1560.27 |
| 35.54 | 1750.97 |
| 35.55 | 1664.29 |
| 35.56 | 1629.62 |
| 35.57 | 1525.6  |
| 35.58 | 1594.95 |
| 35.59 | 2219.06 |
| 35.6  | 1698.96 |
| 35.61 | 1941.67 |
| 35.62 | 1976.35 |
| 35.63 | 1993.68 |
| 35.64 | 1716.3  |
| 35.65 | 1820.32 |
| 35.66 | 2305.74 |
| 35.67 | 2097.7  |
| 35.68 | 2028.36 |
| 35.69 | 1698.96 |
| 35.7  | 1785.65 |
| 35.71 | 2184.38 |
| 35.72 | 2340.41 |
| 35.73 | 2392.42 |

|       |         |
|-------|---------|
| 35.74 | 2115.04 |
| 35.75 | 1802.98 |
| 35.76 | 2409.76 |
| 35.77 | 2080.36 |
| 35.78 | 2219.06 |
| 35.79 | 2097.7  |
| 35.8  | 2149.71 |
| 35.81 | 2219.06 |
| 35.82 | 2617.79 |
| 35.83 | 2201.72 |
| 35.84 | 1976.35 |
| 35.85 | 2201.72 |
| 35.86 | 2687.14 |
| 35.87 | 2617.79 |
| 35.88 | 2513.77 |
| 35.89 | 2773.82 |
| 35.9  | 2392.42 |
| 35.91 | 2513.77 |
| 35.92 | 2895.17 |
| 35.93 | 2912.51 |
| 35.94 | 2999.19 |
| 35.95 | 3189.89 |
| 35.96 | 3276.57 |
| 35.97 | 3866.01 |
| 35.98 | 4056.71 |
| 35.99 | 4195.4  |
| 36    | 4420.77 |
| 36.01 | 4403.44 |
| 36.02 | 4836.85 |
| 36.03 | 5391.61 |
| 36.04 | 5842.36 |
| 36.05 | 6085.07 |
| 36.06 | 6483.8  |
| 36.07 | 7090.58 |
| 36.08 | 7471.98 |
| 36.09 | 7905.38 |
| 36.1  | 8356.13 |
| 36.11 | 9188.28 |
| 36.12 | 10055.1 |
| 36.13 | 10748.5 |
| 36.14 | 11875.4 |
| 36.15 | 12464.9 |
| 36.16 | 13366.3 |
| 36.17 | 14666.6 |

|       |         |
|-------|---------|
| 36.18 | 15498.7 |
| 36.19 | 16313.5 |
| 36.2  | 17717.8 |
| 36.21 | 18220.5 |
| 36.22 | 18185.9 |
| 36.23 | 18445.9 |
| 36.24 | 16642.9 |
| 36.25 | 16625.6 |
| 36.26 | 16122.8 |
| 36.27 | 15533.4 |
| 36.28 | 14077.1 |
| 36.29 | 12846.3 |
| 36.3  | 11927.4 |
| 36.31 | 11702   |
| 36.32 | 11234   |
| 36.33 | 9899.07 |
| 36.34 | 9448.32 |
| 36.35 | 8512.16 |
| 36.36 | 7489.31 |
| 36.37 | 6587.82 |
| 36.38 | 6102.4  |
| 36.39 | 5218.25 |
| 36.4  | 4594.14 |
| 36.41 | 4542.13 |
| 36.42 | 3935.36 |
| 36.43 | 3692.65 |
| 36.44 | 3415.26 |
| 36.45 | 2912.51 |
| 36.46 | 2947.18 |
| 36.47 | 2877.84 |
| 36.48 | 2531.11 |
| 36.49 | 2773.82 |
| 36.5  | 2132.37 |
| 36.51 | 2531.11 |
| 36.52 | 2149.71 |
| 36.53 | 2011.02 |
| 36.54 | 2288.4  |
| 36.55 | 2305.74 |
| 36.56 | 1907    |
| 36.57 | 2011.02 |
| 36.58 | 1768.31 |
| 36.59 | 1837.66 |
| 36.6  | 1976.35 |
| 36.61 | 1664.29 |



|       |         |
|-------|---------|
| 36.62 | 1698.96 |
| 36.63 | 1854.99 |
| 36.64 | 1976.35 |
| 36.65 | 1854.99 |
| 36.66 | 1733.64 |
| 36.67 | 1924.34 |
| 36.68 | 1421.58 |
| 36.69 | 1577.61 |
| 36.7  | 1716.3  |
| 36.71 | 1785.65 |
| 36.72 | 1907    |
| 36.73 | 1768.31 |
| 36.74 | 1768.31 |
| 36.75 | 1716.3  |
| 36.76 | 1404.25 |
| 36.77 | 1664.29 |
| 36.78 | 1698.96 |
| 36.79 | 1421.58 |
| 36.8  | 1750.97 |
| 36.81 | 1750.97 |
| 36.82 | 1612.28 |
| 36.83 | 1646.96 |
| 36.84 | 1456.26 |
| 36.85 | 1646.96 |
| 36.86 | 1612.28 |
| 36.87 | 1473.59 |
| 36.88 | 1542.94 |
| 36.89 | 1473.59 |
| 36.9  | 1386.91 |
| 36.91 | 1664.29 |
| 36.92 | 1421.58 |
| 36.93 | 1750.97 |
| 36.94 | 1664.29 |
| 36.95 | 1629.62 |
| 36.96 | 1456.26 |
| 36.97 | 1646.96 |
| 36.98 | 1508.26 |
| 36.99 | 1525.6  |
| 37    | 1802.98 |
| 37.01 | 1334.9  |
| 37.02 | 1525.6  |
| 37.03 | 1456.26 |
| 37.04 | 1646.96 |
| 37.05 | 1750.97 |

|       |         |
|-------|---------|
| 37.06 | 1386.91 |
| 37.07 | 1508.26 |
| 37.08 | 1369.57 |
| 37.09 | 1629.62 |
| 37.1  | 1594.95 |
| 37.11 | 1612.28 |
| 37.12 | 1594.95 |
| 37.13 | 1248.22 |
| 37.14 | 1421.58 |
| 37.15 | 1438.92 |
| 37.16 | 1542.94 |
| 37.17 | 1508.26 |
| 37.18 | 1473.59 |
| 37.19 | 1334.9  |
| 37.2  | 1716.3  |
| 37.21 | 1282.89 |
| 37.22 | 1438.92 |
| 37.23 | 1248.22 |
| 37.24 | 1525.6  |
| 37.25 | 1508.26 |
| 37.26 | 1560.27 |
| 37.27 | 1577.61 |
| 37.28 | 1473.59 |
| 37.29 | 1490.93 |
| 37.3  | 1646.96 |
| 37.31 | 1369.57 |
| 37.32 | 1525.6  |
| 37.33 | 1438.92 |
| 37.34 | 1542.94 |
| 37.35 | 1525.6  |
| 37.36 | 1508.26 |
| 37.37 | 1837.66 |
| 37.38 | 1577.61 |
| 37.39 | 1664.29 |
| 37.4  | 1698.96 |
| 37.41 | 1698.96 |
| 37.42 | 1629.62 |
| 37.43 | 1421.58 |
| 37.44 | 1542.94 |
| 37.45 | 1750.97 |
| 37.46 | 1508.26 |
| 37.47 | 1421.58 |
| 37.48 | 1716.3  |
| 37.49 | 1525.6  |

|       |         |
|-------|---------|
| 37.5  | 1837.66 |
| 37.51 | 1456.26 |
| 37.52 | 1577.61 |
| 37.53 | 1698.96 |
| 37.54 | 1317.56 |
| 37.55 | 1369.57 |
| 37.56 | 1369.57 |
| 37.57 | 1646.96 |
| 37.58 | 1664.29 |
| 37.59 | 1802.98 |
| 37.6  | 1490.93 |
| 37.61 | 1438.92 |
| 37.62 | 1889.66 |
| 37.63 | 1577.61 |
| 37.64 | 1421.58 |
| 37.65 | 1716.3  |
| 37.66 | 1577.61 |
| 37.67 | 1560.27 |
| 37.68 | 1404.25 |
| 37.69 | 1629.62 |
| 37.7  | 1664.29 |
| 37.71 | 1560.27 |
| 37.72 | 1716.3  |
| 37.73 | 1577.61 |
| 37.74 | 1750.97 |
| 37.75 | 1560.27 |
| 37.76 | 1612.28 |
| 37.77 | 1369.57 |
| 37.78 | 1594.95 |
| 37.79 | 1646.96 |
| 37.8  | 1768.31 |
| 37.81 | 1352.24 |
| 37.82 | 1542.94 |
| 37.83 | 1508.26 |
| 37.84 | 1265.56 |
| 37.85 | 1698.96 |
| 37.86 | 1681.63 |
| 37.87 | 1750.97 |
| 37.88 | 1750.97 |
| 37.89 | 1837.66 |
| 37.9  | 1594.95 |
| 37.91 | 1768.31 |
| 37.92 | 1612.28 |
| 37.93 | 1733.64 |

|       |         |
|-------|---------|
| 37.94 | 1768.31 |
| 37.95 | 1681.63 |
| 37.96 | 1646.96 |
| 37.97 | 1560.27 |
| 37.98 | 1716.3  |
| 37.99 | 1698.96 |
| 38    | 1386.91 |
| 38.01 | 1768.31 |
| 38.02 | 1750.97 |
| 38.03 | 1698.96 |
| 38.04 | 1750.97 |
| 38.05 | 1560.27 |
| 38.06 | 1352.24 |
| 38.07 | 1473.59 |
| 38.08 | 1646.96 |
| 38.09 | 1785.65 |
| 38.1  | 1282.89 |
| 38.11 | 1300.23 |
| 38.12 | 1542.94 |
| 38.13 | 1508.26 |
| 38.14 | 1525.6  |
| 38.15 | 1386.91 |
| 38.16 | 1698.96 |
| 38.17 | 1594.95 |
| 38.18 | 1698.96 |
| 38.19 | 1456.26 |
| 38.2  | 1438.92 |
| 38.21 | 1560.27 |
| 38.22 | 1594.95 |
| 38.23 | 1716.3  |
| 38.24 | 1525.6  |
| 38.25 | 1300.23 |
| 38.26 | 1473.59 |
| 38.27 | 1698.96 |
| 38.28 | 1594.95 |
| 38.29 | 1768.31 |
| 38.3  | 1664.29 |
| 38.31 | 1646.96 |
| 38.32 | 1594.95 |
| 38.33 | 1820.32 |
| 38.34 | 1300.23 |
| 38.35 | 1334.9  |
| 38.36 | 1768.31 |
| 38.37 | 1265.56 |

|       |         |
|-------|---------|
| 38.38 | 1629.62 |
| 38.39 | 1386.91 |
| 38.4  | 1421.58 |
| 38.41 | 1577.61 |
| 38.42 | 1300.23 |
| 38.43 | 1820.32 |
| 38.44 | 1612.28 |
| 38.45 | 1664.29 |
| 38.46 | 1456.26 |
| 38.47 | 1594.95 |
| 38.48 | 1612.28 |
| 38.49 | 1768.31 |
| 38.5  | 1664.29 |
| 38.51 | 1525.6  |
| 38.52 | 1785.65 |
| 38.53 | 1681.63 |
| 38.54 | 1733.64 |
| 38.55 | 1421.58 |
| 38.56 | 1438.92 |
| 38.57 | 1733.64 |
| 38.58 | 1490.93 |
| 38.59 | 1594.95 |
| 38.6  | 1785.65 |
| 38.61 | 1577.61 |
| 38.62 | 1560.27 |
| 38.63 | 1664.29 |
| 38.64 | 1716.3  |
| 38.65 | 1525.6  |
| 38.66 | 1664.29 |
| 38.67 | 1612.28 |
| 38.68 | 1837.66 |
| 38.69 | 1664.29 |
| 38.7  | 1629.62 |
| 38.71 | 1889.66 |
| 38.72 | 1854.99 |
| 38.73 | 1854.99 |
| 38.74 | 1386.91 |
| 38.75 | 1698.96 |
| 38.76 | 1750.97 |
| 38.77 | 1525.6  |
| 38.78 | 1508.26 |
| 38.79 | 1525.6  |
| 38.8  | 1889.66 |
| 38.81 | 1681.63 |

|       |         |
|-------|---------|
| 38.82 | 1733.64 |
| 38.83 | 1854.99 |
| 38.84 | 1768.31 |
| 38.85 | 1733.64 |
| 38.86 | 1785.65 |
| 38.87 | 2063.03 |
| 38.88 | 1959.01 |
| 38.89 | 1837.66 |
| 38.9  | 1698.96 |
| 38.91 | 1768.31 |
| 38.92 | 1854.99 |
| 38.93 | 1733.64 |
| 38.94 | 1907    |
| 38.95 | 2253.73 |
| 38.96 | 1664.29 |
| 38.97 | 1924.34 |
| 38.98 | 1993.68 |
| 38.99 | 1941.67 |
| 39    | 1959.01 |
| 39.01 | 1889.66 |
| 39.02 | 1612.28 |
| 39.03 | 1976.35 |
| 39.04 | 2115.04 |
| 39.05 | 1889.66 |
| 39.06 | 1716.3  |
| 39.07 | 2063.03 |
| 39.08 | 2028.36 |
| 39.09 | 1872.33 |
| 39.1  | 1820.32 |
| 39.11 | 1907    |
| 39.12 | 2080.36 |
| 39.13 | 1959.01 |
| 39.14 | 1924.34 |
| 39.15 | 1907    |
| 39.16 | 1976.35 |
| 39.17 | 2063.03 |
| 39.18 | 2028.36 |
| 39.19 | 1820.32 |
| 39.2  | 1976.35 |
| 39.21 | 2149.71 |
| 39.22 | 1976.35 |
| 39.23 | 2045.69 |
| 39.24 | 2063.03 |
| 39.25 | 2236.39 |

|       |         |
|-------|---------|
| 39.26 | 2375.08 |
| 39.27 | 2513.77 |
| 39.28 | 2513.77 |
| 39.29 | 2236.39 |
| 39.3  | 2305.74 |
| 39.31 | 2808.49 |
| 39.32 | 2565.78 |
| 39.33 | 2947.18 |
| 39.34 | 3259.24 |
| 39.35 | 3068.54 |
| 39.36 | 3397.93 |
| 39.37 | 3657.97 |
| 39.38 | 3328.58 |
| 39.39 | 3814    |
| 39.4  | 4299.42 |
| 39.41 | 4559.47 |
| 39.42 | 5027.55 |
| 39.43 | 5252.92 |
| 39.44 | 6362.45 |
| 39.45 | 6310.44 |
| 39.46 | 6761.18 |
| 39.47 | 7194.59 |
| 39.48 | 8200.1  |
| 39.49 | 8806.88 |
| 39.5  | 8876.22 |
| 39.51 | 10072.4 |
| 39.52 | 10609.9 |
| 39.53 | 12291.5 |
| 39.54 | 13123.6 |
| 39.55 | 14267.8 |
| 39.56 | 15238.7 |
| 39.57 | 15932.1 |
| 39.58 | 17769.8 |
| 39.59 | 19728.8 |
| 39.6  | 21254.4 |
| 39.61 | 23646.8 |
| 39.62 | 25033.7 |
| 39.63 | 25553.8 |
| 39.64 | 27495.5 |
| 39.65 | 26958.1 |
| 39.66 | 27131.4 |
| 39.67 | 27790.2 |
| 39.68 | 24964.4 |
| 39.69 | 24357.6 |

|       |         |
|-------|---------|
| 39.7  | 23022.7 |
| 39.71 | 22051.9 |
| 39.72 | 20942.3 |
| 39.73 | 18914   |
| 39.74 | 17371   |
| 39.75 | 17024.3 |
| 39.76 | 16590.9 |
| 39.77 | 15117.3 |
| 39.78 | 13470.4 |
| 39.79 | 12187.5 |
| 39.8  | 11060.6 |
| 39.81 | 9743.04 |
| 39.82 | 8633.51 |
| 39.83 | 8078.75 |
| 39.84 | 7298.61 |
| 39.85 | 6085.07 |
| 39.86 | 5322.27 |
| 39.87 | 5634.32 |
| 39.88 | 4559.47 |
| 39.89 | 4576.8  |
| 39.9  | 4074.05 |
| 39.91 | 4230.07 |
| 39.92 | 3831.34 |
| 39.93 | 3241.9  |
| 39.94 | 3536.62 |
| 39.95 | 3033.86 |
| 39.96 | 2877.84 |
| 39.97 | 2964.52 |
| 39.98 | 3085.87 |
| 39.99 | 2947.18 |
| 40    | 2704.47 |
| 40.01 | 2791.16 |
| 40.02 | 2721.81 |
| 40.03 | 2739.15 |
| 40.04 | 2721.81 |
| 40.05 | 2895.17 |
| 40.06 | 2687.14 |
| 40.07 | 2427.09 |
| 40.08 | 2877.84 |
| 40.09 | 2669.8  |
| 40.1  | 2253.73 |
| 40.11 | 2461.76 |
| 40.12 | 2028.36 |
| 40.13 | 2080.36 |



|       |         |
|-------|---------|
| 40.14 | 2011.02 |
| 40.15 | 1889.66 |
| 40.16 | 2097.7  |
| 40.17 | 2063.03 |
| 40.18 | 2427.09 |
| 40.19 | 1924.34 |
| 40.2  | 1664.29 |
| 40.21 | 1941.67 |
| 40.22 | 1959.01 |
| 40.23 | 1733.64 |
| 40.24 | 1542.94 |
| 40.25 | 1802.98 |
| 40.26 | 1490.93 |
| 40.27 | 1768.31 |
| 40.28 | 1802.98 |
| 40.29 | 2028.36 |
| 40.3  | 1646.96 |
| 40.31 | 1716.3  |
| 40.32 | 1854.99 |
| 40.33 | 1612.28 |
| 40.34 | 1664.29 |
| 40.35 | 1438.92 |
| 40.36 | 1785.65 |
| 40.37 | 1560.27 |
| 40.38 | 1577.61 |
| 40.39 | 1681.63 |
| 40.4  | 1490.93 |
| 40.41 | 1646.96 |
| 40.42 | 1542.94 |
| 40.43 | 1542.94 |
| 40.44 | 1681.63 |
| 40.45 | 1438.92 |
| 40.46 | 1438.92 |
| 40.47 | 1386.91 |
| 40.48 | 1820.32 |
| 40.49 | 1386.91 |
| 40.5  | 1646.96 |
| 40.51 | 1265.56 |
| 40.52 | 1386.91 |
| 40.53 | 1542.94 |
| 40.54 | 1300.23 |
| 40.55 | 1560.27 |
| 40.56 | 1802.98 |
| 40.57 | 1386.91 |

|       |         |
|-------|---------|
| 40.58 | 1438.92 |
| 40.59 | 1404.25 |
| 40.6  | 1456.26 |
| 40.61 | 1334.9  |
| 40.62 | 1490.93 |
| 40.63 | 1612.28 |
| 40.64 | 1629.62 |
| 40.65 | 1161.54 |
| 40.66 | 1577.61 |
| 40.67 | 1768.31 |
| 40.68 | 1369.57 |
| 40.69 | 1508.26 |
| 40.7  | 1456.26 |
| 40.71 | 1456.26 |
| 40.72 | 1508.26 |
| 40.73 | 1456.26 |
| 40.74 | 1872.33 |
| 40.75 | 1525.6  |
| 40.76 | 1473.59 |
| 40.77 | 1369.57 |
| 40.78 | 1664.29 |
| 40.79 | 1352.24 |
| 40.8  | 1404.25 |
| 40.81 | 1248.22 |
| 40.82 | 1542.94 |
| 40.83 | 1560.27 |
| 40.84 | 1612.28 |
| 40.85 | 1404.25 |
| 40.86 | 1594.95 |
| 40.87 | 1404.25 |
| 40.88 | 1265.56 |
| 40.89 | 1473.59 |
| 40.9  | 1681.63 |
| 40.91 | 1456.26 |
| 40.92 | 1213.55 |
| 40.93 | 1438.92 |
| 40.94 | 1300.23 |
| 40.95 | 1508.26 |
| 40.96 | 1456.26 |
| 40.97 | 1525.6  |
| 40.98 | 1386.91 |
| 40.99 | 1525.6  |
| 41    | 1508.26 |
| 41.01 | 1438.92 |

|       |         |
|-------|---------|
| 41.02 | 1473.59 |
| 41.03 | 1681.63 |
| 41.04 | 1612.28 |
| 41.05 | 1802.98 |
| 41.06 | 1404.25 |
| 41.07 | 1369.57 |
| 41.08 | 1421.58 |
| 41.09 | 1490.93 |
| 41.1  | 1473.59 |
| 41.11 | 1508.26 |
| 41.12 | 1230.88 |
| 41.13 | 1386.91 |
| 41.14 | 1664.29 |
| 41.15 | 1560.27 |
| 41.16 | 1230.88 |
| 41.17 | 1629.62 |
| 41.18 | 1421.58 |
| 41.19 | 1612.28 |
| 41.2  | 1629.62 |
| 41.21 | 1404.25 |
| 41.22 | 1300.23 |
| 41.23 | 1577.61 |
| 41.24 | 1352.24 |
| 41.25 | 1542.94 |
| 41.26 | 1716.3  |
| 41.27 | 1542.94 |
| 41.28 | 1664.29 |
| 41.29 | 1664.29 |
| 41.3  | 1646.96 |
| 41.31 | 1802.98 |
| 41.32 | 1612.28 |
| 41.33 | 1802.98 |
| 41.34 | 1993.68 |
| 41.35 | 1716.3  |
| 41.36 | 2011.02 |
| 41.37 | 2115.04 |
| 41.38 | 1959.01 |
| 41.39 | 1976.35 |
| 41.4  | 1716.3  |
| 41.41 | 1993.68 |
| 41.42 | 1959.01 |
| 41.43 | 2011.02 |
| 41.44 | 1681.63 |
| 41.45 | 1976.35 |

|       |         |
|-------|---------|
| 41.46 | 1768.31 |
| 41.47 | 1941.67 |
| 41.48 | 2115.04 |
| 41.49 | 2271.06 |
| 41.5  | 2305.74 |
| 41.51 | 2219.06 |
| 41.52 | 2305.74 |
| 41.53 | 2201.72 |
| 41.54 | 2028.36 |
| 41.55 | 1854.99 |
| 41.56 | 1629.62 |
| 41.57 | 1872.33 |
| 41.58 | 1612.28 |
| 41.59 | 1820.32 |
| 41.6  | 2097.7  |
| 41.61 | 2132.37 |
| 41.62 | 2045.69 |
| 41.63 | 1820.32 |
| 41.64 | 2201.72 |
| 41.65 | 2167.05 |
| 41.66 | 1681.63 |
| 41.67 | 1542.94 |
| 41.68 | 1560.27 |
| 41.69 | 1473.59 |
| 41.7  | 1473.59 |
| 41.71 | 1525.6  |
| 41.72 | 1490.93 |
| 41.73 | 1525.6  |
| 41.74 | 1681.63 |
| 41.75 | 1577.61 |
| 41.76 | 1594.95 |
| 41.77 | 1508.26 |
| 41.78 | 1369.57 |
| 41.79 | 1698.96 |
| 41.8  | 1750.97 |
| 41.81 | 1698.96 |
| 41.82 | 1820.32 |
| 41.83 | 1508.26 |
| 41.84 | 1976.35 |
| 41.85 | 1872.33 |
| 41.86 | 1802.98 |
| 41.87 | 1733.64 |
| 41.88 | 1959.01 |
| 41.89 | 1802.98 |

|       |         |
|-------|---------|
| 41.9  | 1560.27 |
| 41.91 | 1959.01 |
| 41.92 | 1664.29 |
| 41.93 | 1629.62 |
| 41.94 | 1959.01 |
| 41.95 | 1646.96 |
| 41.96 | 2080.36 |
| 41.97 | 1733.64 |
| 41.98 | 1768.31 |
| 41.99 | 1854.99 |
| 42    | 1698.96 |
| 42.01 | 1508.26 |
| 42.02 | 1525.6  |
| 42.03 | 1802.98 |
| 42.04 | 1698.96 |
| 42.05 | 1768.31 |
| 42.06 | 1854.99 |
| 42.07 | 1698.96 |
| 42.08 | 1785.65 |
| 42.09 | 1525.6  |
| 42.1  | 1681.63 |
| 42.11 | 1542.94 |
| 42.12 | 1473.59 |
| 42.13 | 1802.98 |
| 42.14 | 1508.26 |
| 42.15 | 1525.6  |
| 42.16 | 1646.96 |
| 42.17 | 1577.61 |
| 42.18 | 1698.96 |
| 42.19 | 1629.62 |
| 42.2  | 1837.66 |
| 42.21 | 1560.27 |
| 42.22 | 1629.62 |
| 42.23 | 1768.31 |
| 42.24 | 1716.3  |
| 42.25 | 1421.58 |
| 42.26 | 1421.58 |
| 42.27 | 1490.93 |
| 42.28 | 1872.33 |
| 42.29 | 1646.96 |
| 42.3  | 1577.61 |
| 42.31 | 1716.3  |
| 42.32 | 1560.27 |
| 42.33 | 1404.25 |

42.34 1508.26  
42.35 1317.56  
42.36 1542.94  
42.37 1681.63  
42.38 1768.31  
42.39 1907  
42.4 1785.65  
42.41 1612.28  
42.42 1872.33  
42.43 1421.58  
42.44 1542.94  
42.45 1716.3  
42.46 1560.27  
42.47 1629.62  
42.48 2045.69  
42.49 1525.6  
42.5 1785.65  
42.51 1820.32  
42.52 1681.63  
42.53 1629.62  
42.54 1386.91  
42.55 1334.9  
42.56 1508.26  
42.57 1525.6  
42.58 1525.6  
42.59 1907  
42.6 1542.94  
42.61 1490.93  
42.62 1542.94  
42.63 1421.58  
42.64 1664.29  
42.65 1681.63  
42.66 1646.96  
42.67 1733.64  
42.68 1976.35  
42.69 1820.32  
42.7 1733.64  
42.71 1681.63  
42.72 1646.96  
42.73 1959.01  
42.74 1785.65  
42.75 1820.32  
42.76 1854.99  
42.77 1802.98

|       |         |
|-------|---------|
| 42.78 | 1750.97 |
| 42.79 | 1664.29 |
| 42.8  | 1768.31 |
| 42.81 | 1924.34 |
| 42.82 | 1854.99 |
| 42.83 | 1993.68 |
| 42.84 | 1872.33 |
| 42.85 | 1907    |
| 42.86 | 2011.02 |
| 42.87 | 1976.35 |
| 42.88 | 2340.41 |
| 42.89 | 1976.35 |
| 42.9  | 2236.39 |
| 42.91 | 2097.7  |
| 42.92 | 1993.68 |
| 42.93 | 1733.64 |
| 42.94 | 2167.05 |
| 42.95 | 1959.01 |
| 42.96 | 1872.33 |
| 42.97 | 2253.73 |
| 42.98 | 2461.76 |
| 42.99 | 2323.07 |
| 43    | 2340.41 |
| 43.01 | 2271.06 |
| 43.02 | 2115.04 |
| 43.03 | 2565.78 |
| 43.04 | 2773.82 |
| 43.05 | 2479.1  |
| 43.06 | 2652.46 |
| 43.07 | 2392.42 |
| 43.08 | 2825.83 |
| 43.09 | 2791.16 |
| 43.1  | 2964.52 |
| 43.11 | 2912.51 |
| 43.12 | 2825.83 |
| 43.13 | 3276.57 |
| 43.14 | 3692.65 |
| 43.15 | 3692.65 |
| 43.16 | 4420.77 |
| 43.17 | 4351.43 |
| 43.18 | 4923.53 |
| 43.19 | 5131.57 |
| 43.2  | 5079.56 |
| 43.21 | 5981.05 |

|       |         |
|-------|---------|
| 43.22 | 6171.75 |
| 43.23 | 6310.44 |
| 43.24 | 7281.28 |
| 43.25 | 7662.68 |
| 43.26 | 8373.47 |
| 43.27 | 8373.47 |
| 43.28 | 9326.97 |
| 43.29 | 10679.2 |
| 43.3  | 11563.4 |
| 43.31 | 12204.8 |
| 43.32 | 12863.6 |
| 43.33 | 14077.1 |
| 43.34 | 15845.4 |
| 43.35 | 17024.3 |
| 43.36 | 19832.8 |
| 43.37 | 21081   |
| 43.38 | 22103.9 |
| 43.39 | 22398.6 |
| 43.4  | 22970.7 |
| 43.41 | 22901.3 |
| 43.42 | 22554.6 |
| 43.43 | 21167.7 |
| 43.44 | 19243.4 |
| 43.45 | 18497.9 |
| 43.46 | 17648.4 |
| 43.47 | 16833.6 |
| 43.48 | 15585.4 |
| 43.49 | 15169.3 |
| 43.5  | 14441.2 |
| 43.51 | 14233.2 |
| 43.52 | 13071.6 |
| 43.53 | 12464.9 |
| 43.54 | 12170.1 |
| 43.55 | 10765.9 |
| 43.56 | 9118.93 |
| 43.57 | 8252.11 |
| 43.58 | 7055.9  |
| 43.59 | 6431.79 |
| 43.6  | 6015.72 |
| 43.61 | 5721    |
| 43.62 | 5426.28 |
| 43.63 | 4524.79 |
| 43.64 | 4316.76 |
| 43.65 | 4247.41 |



|       |         |
|-------|---------|
| 43.66 | 3449.94 |
| 43.67 | 3449.94 |
| 43.68 | 3761.99 |
| 43.69 | 3345.92 |
| 43.7  | 3519.28 |
| 43.71 | 3276.57 |
| 43.72 | 3068.54 |
| 43.73 | 3103.21 |
| 43.74 | 2947.18 |
| 43.75 | 3033.86 |
| 43.76 | 3016.53 |
| 43.77 | 2600.46 |
| 43.78 | 2392.42 |
| 43.79 | 2357.75 |
| 43.8  | 2357.75 |
| 43.81 | 2444.43 |
| 43.82 | 2427.09 |
| 43.83 | 2149.71 |
| 43.84 | 2305.74 |
| 43.85 | 2219.06 |
| 43.86 | 1976.35 |
| 43.87 | 2063.03 |
| 43.88 | 2479.1  |
| 43.89 | 1941.67 |
| 43.9  | 1924.34 |
| 43.91 | 2097.7  |
| 43.92 | 2149.71 |
| 43.93 | 2028.36 |
| 43.94 | 1872.33 |
| 43.95 | 1802.98 |
| 43.96 | 1924.34 |
| 43.97 | 2045.69 |
| 43.98 | 2236.39 |
| 43.99 | 1716.3  |
| 44    | 1907    |
| 44.01 | 1768.31 |
| 44.02 | 1750.97 |
| 44.03 | 1854.99 |
| 44.04 | 2115.04 |
| 44.05 | 2271.06 |
| 44.06 | 1854.99 |
| 44.07 | 1646.96 |
| 44.08 | 1681.63 |
| 44.09 | 1820.32 |

|       |         |
|-------|---------|
| 44.1  | 2011.02 |
| 44.11 | 2184.38 |
| 44.12 | 1802.98 |
| 44.13 | 1577.61 |
| 44.14 | 1976.35 |
| 44.15 | 1629.62 |
| 44.16 | 1924.34 |
| 44.17 | 1837.66 |
| 44.18 | 1716.3  |
| 44.19 | 1612.28 |
| 44.2  | 1785.65 |
| 44.21 | 1508.26 |
| 44.22 | 1733.64 |
| 44.23 | 1959.01 |
| 44.24 | 1629.62 |
| 44.25 | 1664.29 |
| 44.26 | 1369.57 |
| 44.27 | 1664.29 |
| 44.28 | 1594.95 |
| 44.29 | 1698.96 |
| 44.3  | 1646.96 |
| 44.31 | 1768.31 |
| 44.32 | 1698.96 |
| 44.33 | 1421.58 |
| 44.34 | 1577.61 |
| 44.35 | 1629.62 |
| 44.36 | 1768.31 |
| 44.37 | 2132.37 |
| 44.38 | 1698.96 |
| 44.39 | 1681.63 |
| 44.4  | 1733.64 |
| 44.41 | 1681.63 |
| 44.42 | 1490.93 |
| 44.43 | 1542.94 |
| 44.44 | 1837.66 |
| 44.45 | 1733.64 |
| 44.46 | 1820.32 |
| 44.47 | 1490.93 |
| 44.48 | 1681.63 |
| 44.49 | 1716.3  |
| 44.5  | 1542.94 |
| 44.51 | 1664.29 |
| 44.52 | 1993.68 |
| 44.53 | 1698.96 |

|       |         |
|-------|---------|
| 44.54 | 1837.66 |
| 44.55 | 1681.63 |
| 44.56 | 1802.98 |
| 44.57 | 1837.66 |
| 44.58 | 1490.93 |
| 44.59 | 1785.65 |
| 44.6  | 1508.26 |
| 44.61 | 1716.3  |
| 44.62 | 1768.31 |
| 44.63 | 1629.62 |
| 44.64 | 1525.6  |
| 44.65 | 1681.63 |
| 44.66 | 1768.31 |
| 44.67 | 1300.23 |
| 44.68 | 1490.93 |
| 44.69 | 1646.96 |
| 44.7  | 1646.96 |
| 44.71 | 1941.67 |
| 44.72 | 1664.29 |
| 44.73 | 1456.26 |
| 44.74 | 1560.27 |
| 44.75 | 1612.28 |
| 44.76 | 1542.94 |
| 44.77 | 1594.95 |
| 44.78 | 1698.96 |
| 44.79 | 1820.32 |
| 44.8  | 1473.59 |
| 44.81 | 1577.61 |
| 44.82 | 1438.92 |
| 44.83 | 1352.24 |
| 44.84 | 1525.6  |
| 44.85 | 1473.59 |
| 44.86 | 1213.55 |
| 44.87 | 1404.25 |
| 44.88 | 1352.24 |
| 44.89 | 1456.26 |
| 44.9  | 1438.92 |
| 44.91 | 1438.92 |
| 44.92 | 1837.66 |
| 44.93 | 1612.28 |
| 44.94 | 1334.9  |
| 44.95 | 1542.94 |
| 44.96 | 1594.95 |
| 44.97 | 1733.64 |

|       |         |
|-------|---------|
| 44.98 | 1594.95 |
| 44.99 | 1629.62 |
| 45    | 1230.88 |
| 45.01 | 1317.56 |
| 45.02 | 1542.94 |
| 45.03 | 1820.32 |
| 45.04 | 1716.3  |
| 45.05 | 1664.29 |
| 45.06 | 1594.95 |
| 45.07 | 1473.59 |
| 45.08 | 1594.95 |
| 45.09 | 1369.57 |
| 45.1  | 1594.95 |
| 45.11 | 1386.91 |
| 45.12 | 1542.94 |
| 45.13 | 1716.3  |
| 45.14 | 1664.29 |
| 45.15 | 1924.34 |
| 45.16 | 1473.59 |
| 45.17 | 1785.65 |
| 45.18 | 1560.27 |
| 45.19 | 1664.29 |
| 45.2  | 1612.28 |
| 45.21 | 1577.61 |
| 45.22 | 1612.28 |
| 45.23 | 1941.67 |
| 45.24 | 1768.31 |
| 45.25 | 1681.63 |
| 45.26 | 1438.92 |
| 45.27 | 1629.62 |
| 45.28 | 1230.88 |
| 45.29 | 1542.94 |
| 45.3  | 1646.96 |
| 45.31 | 1560.27 |
| 45.32 | 1525.6  |
| 45.33 | 1612.28 |
| 45.34 | 1646.96 |
| 45.35 | 1941.67 |
| 45.36 | 1681.63 |
| 45.37 | 1785.65 |
| 45.38 | 1854.99 |
| 45.39 | 1993.68 |
| 45.4  | 2115.04 |
| 45.41 | 1837.66 |

|       |         |
|-------|---------|
| 45.42 | 2011.02 |
| 45.43 | 2184.38 |
| 45.44 | 2028.36 |
| 45.45 | 2132.37 |
| 45.46 | 2305.74 |
| 45.47 | 2028.36 |
| 45.48 | 1750.97 |
| 45.49 | 1941.67 |
| 45.5  | 1924.34 |
| 45.51 | 1612.28 |
| 45.52 | 1542.94 |
| 45.53 | 1473.59 |
| 45.54 | 1924.34 |
| 45.55 | 1577.61 |
| 45.56 | 1785.65 |
| 45.57 | 1698.96 |
| 45.58 | 1716.3  |
| 45.59 | 1785.65 |
| 45.6  | 1646.96 |
| 45.61 | 1594.95 |
| 45.62 | 1404.25 |
| 45.63 | 1594.95 |
| 45.64 | 1473.59 |
| 45.65 | 1438.92 |
| 45.66 | 1612.28 |
| 45.67 | 1820.32 |
| 45.68 | 1785.65 |
| 45.69 | 1490.93 |
| 45.7  | 1629.62 |
| 45.71 | 1490.93 |
| 45.72 | 1525.6  |
| 45.73 | 1959.01 |
| 45.74 | 1438.92 |
| 45.75 | 1872.33 |
| 45.76 | 1629.62 |
| 45.77 | 1646.96 |
| 45.78 | 1750.97 |
| 45.79 | 1612.28 |
| 45.8  | 1698.96 |
| 45.81 | 1629.62 |
| 45.82 | 1560.27 |
| 45.83 | 1733.64 |
| 45.84 | 1716.3  |
| 45.85 | 1785.65 |

|       |         |
|-------|---------|
| 45.86 | 1889.66 |
| 45.87 | 1438.92 |
| 45.88 | 1716.3  |
| 45.89 | 1785.65 |
| 45.9  | 1716.3  |
| 45.91 | 2028.36 |
| 45.92 | 1802.98 |
| 45.93 | 1525.6  |
| 45.94 | 1612.28 |
| 45.95 | 1473.59 |
| 45.96 | 1837.66 |
| 45.97 | 2115.04 |
| 45.98 | 1976.35 |
| 45.99 | 1560.27 |
| 46    | 1664.29 |
| 46.01 | 1525.6  |
| 46.02 | 1421.58 |
| 46.03 | 1716.3  |
| 46.04 | 1629.62 |
| 46.05 | 1785.65 |
| 46.06 | 1768.31 |
| 46.07 | 1490.93 |
| 46.08 | 1854.99 |
| 46.09 | 1698.96 |
| 46.1  | 1820.32 |
| 46.11 | 1716.3  |
| 46.12 | 1698.96 |
| 46.13 | 1941.67 |
| 46.14 | 1542.94 |
| 46.15 | 1646.96 |
| 46.16 | 1577.61 |
| 46.17 | 1750.97 |
| 46.18 | 1785.65 |
| 46.19 | 1907    |
| 46.2  | 1577.61 |
| 46.21 | 1629.62 |
| 46.22 | 1785.65 |
| 46.23 | 1698.96 |
| 46.24 | 1594.95 |
| 46.25 | 1369.57 |
| 46.26 | 1664.29 |
| 46.27 | 1733.64 |
| 46.28 | 1629.62 |
| 46.29 | 1716.3  |

|       |         |
|-------|---------|
| 46.3  | 1681.63 |
| 46.31 | 1456.26 |
| 46.32 | 1716.3  |
| 46.33 | 1854.99 |
| 46.34 | 1508.26 |
| 46.35 | 1733.64 |
| 46.36 | 1837.66 |
| 46.37 | 1872.33 |
| 46.38 | 2080.36 |
| 46.39 | 1629.62 |
| 46.4  | 1542.94 |
| 46.41 | 1629.62 |
| 46.42 | 1681.63 |
| 46.43 | 1768.31 |
| 46.44 | 1785.65 |
| 46.45 | 1768.31 |
| 46.46 | 1542.94 |
| 46.47 | 1785.65 |
| 46.48 | 1386.91 |
| 46.49 | 1352.24 |
| 46.5  | 1646.96 |
| 46.51 | 1733.64 |
| 46.52 | 1872.33 |
| 46.53 | 1854.99 |
| 46.54 | 1629.62 |
| 46.55 | 1508.26 |
| 46.56 | 1456.26 |
| 46.57 | 1872.33 |
| 46.58 | 1646.96 |
| 46.59 | 1854.99 |
| 46.6  | 1820.32 |
| 46.61 | 1854.99 |
| 46.62 | 1750.97 |
| 46.63 | 1768.31 |
| 46.64 | 1872.33 |
| 46.65 | 1889.66 |
| 46.66 | 1993.68 |
| 46.67 | 2028.36 |
| 46.68 | 1629.62 |
| 46.69 | 1837.66 |
| 46.7  | 1889.66 |
| 46.71 | 1993.68 |
| 46.72 | 1716.3  |
| 46.73 | 1924.34 |

|       |         |
|-------|---------|
| 46.74 | 2149.71 |
| 46.75 | 1924.34 |
| 46.76 | 1924.34 |
| 46.77 | 2184.38 |
| 46.78 | 1698.96 |
| 46.79 | 1854.99 |
| 46.8  | 1664.29 |
| 46.81 | 2028.36 |
| 46.82 | 1941.67 |
| 46.83 | 1976.35 |
| 46.84 | 1959.01 |
| 46.85 | 1941.67 |
| 46.86 | 1733.64 |
| 46.87 | 2063.03 |
| 46.88 | 1976.35 |
| 46.89 | 1698.96 |
| 46.9  | 1716.3  |
| 46.91 | 2028.36 |
| 46.92 | 2080.36 |
| 46.93 | 1872.33 |
| 46.94 | 2097.7  |
| 46.95 | 2184.38 |
| 46.96 | 2496.44 |
| 46.97 | 2063.03 |
| 46.98 | 2323.07 |
| 46.99 | 2461.76 |
| 47    | 2548.45 |
| 47.01 | 2687.14 |
| 47.02 | 2635.13 |
| 47.03 | 2687.14 |
| 47.04 | 2652.46 |
| 47.05 | 2877.84 |
| 47.06 | 2773.82 |
| 47.07 | 2756.48 |
| 47.08 | 2947.18 |
| 47.09 | 2791.16 |
| 47.1  | 3155.22 |
| 47.11 | 2721.81 |
| 47.12 | 3241.9  |
| 47.13 | 3501.95 |
| 47.14 | 3536.62 |
| 47.15 | 3536.62 |
| 47.16 | 3814    |
| 47.17 | 3814    |



|       |         |
|-------|---------|
| 47.18 | 4056.71 |
| 47.19 | 4455.45 |
| 47.2  | 4264.75 |
| 47.21 | 5131.57 |
| 47.22 | 5616.98 |
| 47.23 | 5773.01 |
| 47.24 | 5686.33 |
| 47.25 | 6154.41 |
| 47.26 | 6778.52 |
| 47.27 | 7211.93 |
| 47.28 | 7523.98 |
| 47.29 | 8460.15 |
| 47.3  | 8512.16 |
| 47.31 | 9465.66 |
| 47.32 | 9517.67 |
| 47.33 | 9864.39 |
| 47.34 | 10575.2 |
| 47.35 | 10332.5 |
| 47.36 | 11390   |
| 47.37 | 10627.2 |
| 47.38 | 10523.2 |
| 47.39 | 10107.1 |
| 47.4  | 10384.5 |
| 47.41 | 9829.72 |
| 47.42 | 9847.06 |
| 47.43 | 9500.33 |
| 47.44 | 9465.66 |
| 47.45 | 9032.25 |
| 47.46 | 10107.1 |
| 47.47 | 10037.8 |
| 47.48 | 9517.67 |
| 47.49 | 10072.4 |
| 47.5  | 11424.7 |
| 47.51 | 11442   |
| 47.52 | 11390   |
| 47.53 | 11043.3 |
| 47.54 | 11077.9 |
| 47.55 | 11910.1 |
| 47.56 | 13193   |
| 47.57 | 13817.1 |
| 47.58 | 14614.6 |
| 47.59 | 15342.7 |
| 47.6  | 16920.3 |
| 47.61 | 16556.2 |

|       |         |
|-------|---------|
| 47.62 | 18966   |
| 47.63 | 21289.1 |
| 47.64 | 22294.6 |
| 47.65 | 23126.7 |
| 47.66 | 24635   |
| 47.67 | 26906   |
| 47.68 | 28674.4 |
| 47.69 | 29593.2 |
| 47.7  | 30876.1 |
| 47.71 | 33320.5 |
| 47.72 | 33736.6 |
| 47.73 | 32349.7 |
| 47.74 | 32523   |
| 47.75 | 33129.8 |
| 47.76 | 31326.8 |
| 47.77 | 29246.5 |
| 47.78 | 28345   |
| 47.79 | 26004.6 |
| 47.8  | 25224.4 |
| 47.81 | 23837.5 |
| 47.82 | 22346.6 |
| 47.83 | 22641.3 |
| 47.84 | 21254.4 |
| 47.85 | 20873   |
| 47.86 | 20110.2 |
| 47.87 | 18185.9 |
| 47.88 | 17145.7 |
| 47.89 | 16746.9 |
| 47.9  | 14319.8 |
| 47.91 | 12950.3 |
| 47.92 | 12482.2 |
| 47.93 | 11164.6 |
| 47.94 | 10037.8 |
| 47.95 | 9136.27 |
| 47.96 | 7575.99 |
| 47.97 | 7177.26 |
| 47.98 | 7194.59 |
| 47.99 | 7159.92 |
| 48    | 6639.83 |
| 48.01 | 6293.1  |
| 48.02 | 5963.71 |
| 48.03 | 5599.65 |
| 48.04 | 5478.29 |
| 48.05 | 4975.54 |

|       |         |
|-------|---------|
| 48.06 | 4975.54 |
| 48.07 | 4559.47 |
| 48.08 | 4732.83 |
| 48.09 | 5166.24 |
| 48.1  | 4611.47 |
| 48.11 | 4143.39 |
| 48.12 | 4282.08 |
| 48.13 | 4212.74 |
| 48.14 | 4230.07 |
| 48.15 | 4056.71 |
| 48.16 | 3935.36 |
| 48.17 | 4126.06 |
| 48.18 | 3848.67 |
| 48.19 | 3761.99 |
| 48.2  | 4160.73 |
| 48.21 | 3657.97 |
| 48.22 | 4039.37 |
| 48.23 | 3675.31 |
| 48.24 | 3519.28 |
| 48.25 | 3536.62 |
| 48.26 | 3675.31 |
| 48.27 | 3605.97 |
| 48.28 | 3397.93 |
| 48.29 | 3207.23 |
| 48.3  | 3467.27 |
| 48.31 | 3259.24 |
| 48.32 | 3224.56 |
| 48.33 | 2981.86 |
| 48.34 | 3085.87 |
| 48.35 | 3571.29 |
| 48.36 | 3519.28 |
| 48.37 | 3397.93 |
| 48.38 | 3259.24 |
| 48.39 | 3640.64 |
| 48.4  | 3623.3  |
| 48.41 | 3970.03 |
| 48.42 | 3814    |
| 48.43 | 3675.31 |
| 48.44 | 4368.77 |
| 48.45 | 4836.85 |
| 48.46 | 4836.85 |
| 48.47 | 5512.97 |
| 48.48 | 5530.3  |
| 48.49 | 5634.32 |

|       |         |
|-------|---------|
| 48.5  | 5721    |
| 48.51 | 6293.1  |
| 48.52 | 6917.21 |
| 48.53 | 7125.25 |
| 48.54 | 8113.42 |
| 48.55 | 9101.59 |
| 48.56 | 9361.64 |
| 48.57 | 9916.4  |
| 48.58 | 10245.8 |
| 48.59 | 11286   |
| 48.6  | 11736.7 |
| 48.61 | 12950.3 |
| 48.62 | 14371.9 |
| 48.63 | 15724.1 |
| 48.64 | 16937.6 |
| 48.65 | 19226   |
| 48.66 | 19954.2 |
| 48.67 | 22433.3 |
| 48.68 | 24270.9 |
| 48.69 | 25657.8 |
| 48.7  | 27391.5 |
| 48.71 | 28327.6 |
| 48.72 | 30269.3 |
| 48.73 | 29506.5 |
| 48.74 | 30373.3 |
| 48.75 | 30078.6 |
| 48.76 | 29073.1 |
| 48.77 | 28119.6 |
| 48.78 | 24669.7 |
| 48.79 | 23144.1 |
| 48.8  | 21930.5 |
| 48.81 | 21843.8 |
| 48.82 | 20612.9 |
| 48.83 | 20335.6 |
| 48.84 | 19798.1 |
| 48.85 | 19208.7 |
| 48.86 | 19104.7 |
| 48.87 | 17596.4 |
| 48.88 | 16833.6 |
| 48.89 | 15689.4 |
| 48.9  | 13245   |
| 48.91 | 13019.6 |
| 48.92 | 11442   |
| 48.93 | 10973.9 |

|       |         |
|-------|---------|
| 48.94 | 9569.68 |
| 48.95 | 8633.51 |
| 48.96 | 8061.41 |
| 48.97 | 6397.12 |
| 48.98 | 6293.1  |
| 48.99 | 6327.78 |
| 49    | 5599.65 |
| 49.01 | 5270.26 |
| 49.02 | 4386.1  |
| 49.03 | 4490.12 |
| 49.04 | 4212.74 |
| 49.05 | 3761.99 |
| 49.06 | 4143.39 |
| 49.07 | 3952.69 |
| 49.08 | 3484.61 |
| 49.09 | 3051.2  |
| 49.1  | 3172.56 |
| 49.11 | 3449.94 |
| 49.12 | 3866.01 |
| 49.13 | 2929.85 |
| 49.14 | 3155.22 |
| 49.15 | 3033.86 |
| 49.16 | 2860.5  |
| 49.17 | 2669.8  |
| 49.18 | 2756.48 |
| 49.19 | 2461.76 |
| 49.2  | 2271.06 |
| 49.21 | 2513.77 |
| 49.22 | 2323.07 |
| 49.23 | 2583.12 |
| 49.24 | 2236.39 |
| 49.25 | 2565.78 |
| 49.26 | 2028.36 |
| 49.27 | 2444.43 |
| 49.28 | 2375.08 |
| 49.29 | 2219.06 |
| 49.3  | 2375.08 |
| 49.31 | 2305.74 |
| 49.32 | 2201.72 |
| 49.33 | 2288.4  |
| 49.34 | 2063.03 |
| 49.35 | 2149.71 |
| 49.36 | 1820.32 |
| 49.37 | 2409.76 |

|       |         |
|-------|---------|
| 49.38 | 1993.68 |
| 49.39 | 2219.06 |
| 49.4  | 2063.03 |
| 49.41 | 1993.68 |
| 49.42 | 1907    |
| 49.43 | 2028.36 |
| 49.44 | 1750.97 |
| 49.45 | 1872.33 |
| 49.46 | 1646.96 |
| 49.47 | 1993.68 |
| 49.48 | 1750.97 |
| 49.49 | 1646.96 |
| 49.5  | 1802.98 |
| 49.51 | 1490.93 |
| 49.52 | 1456.26 |
| 49.53 | 1698.96 |
| 49.54 | 1664.29 |
| 49.55 | 1508.26 |
| 49.56 | 1612.28 |
| 49.57 | 1733.64 |
| 49.58 | 1889.66 |
| 49.59 | 1594.95 |
| 49.6  | 1577.61 |
| 49.61 | 1525.6  |
| 49.62 | 1768.31 |
| 49.63 | 1681.63 |
| 49.64 | 1490.93 |
| 49.65 | 1438.92 |
| 49.66 | 1785.65 |
| 49.67 | 1785.65 |
| 49.68 | 1681.63 |
| 49.69 | 1750.97 |
| 49.7  | 1629.62 |
| 49.71 | 1490.93 |
| 49.72 | 1750.97 |
| 49.73 | 1698.96 |
| 49.74 | 1681.63 |
| 49.75 | 1629.62 |
| 49.76 | 1490.93 |
| 49.77 | 1404.25 |
| 49.78 | 1542.94 |
| 49.79 | 1785.65 |
| 49.8  | 1542.94 |
| 49.81 | 1490.93 |

|       |         |
|-------|---------|
| 49.82 | 1421.58 |
| 49.83 | 1282.89 |
| 49.84 | 1560.27 |
| 49.85 | 1837.66 |
| 49.86 | 1629.62 |
| 49.87 | 1681.63 |
| 49.88 | 1438.92 |
| 49.89 | 1386.91 |
| 49.9  | 1213.55 |
| 49.91 | 1213.55 |
| 49.92 | 1542.94 |
| 49.93 | 1334.9  |
| 49.94 | 1490.93 |
| 49.95 | 1248.22 |
| 49.96 | 1386.91 |
| 49.97 | 1404.25 |
| 49.98 | 1664.29 |
| 49.99 | 1352.24 |
| 50    | 1334.9  |
| 50.01 | 1334.9  |
| 50.02 | 1317.56 |
| 50.03 | 1352.24 |
| 50.04 | 1369.57 |
| 50.05 | 1334.9  |
| 50.06 | 1716.3  |
| 50.07 | 1473.59 |
| 50.08 | 1230.88 |
| 50.09 | 1300.23 |
| 50.1  | 1196.21 |
| 50.11 | 1161.54 |
| 50.12 | 1369.57 |
| 50.13 | 1456.26 |
| 50.14 | 1490.93 |
| 50.15 | 1352.24 |
| 50.16 | 1560.27 |
| 50.17 | 1525.6  |
| 50.18 | 1386.91 |
| 50.19 | 1334.9  |
| 50.2  | 1508.26 |
| 50.21 | 1334.9  |
| 50.22 | 1820.32 |
| 50.23 | 1386.91 |
| 50.24 | 1646.96 |
| 50.25 | 1438.92 |

|       |         |
|-------|---------|
| 50.26 | 1404.25 |
| 50.27 | 1629.62 |
| 50.28 | 1508.26 |
| 50.29 | 1300.23 |
| 50.3  | 1508.26 |
| 50.31 | 1317.56 |
| 50.32 | 1438.92 |
| 50.33 | 1334.9  |
| 50.34 | 1438.92 |
| 50.35 | 1421.58 |
| 50.36 | 1646.96 |
| 50.37 | 1438.92 |
| 50.38 | 1438.92 |
| 50.39 | 1664.29 |
| 50.4  | 1612.28 |
| 50.41 | 1282.89 |
| 50.42 | 1386.91 |
| 50.43 | 1352.24 |
| 50.44 | 1490.93 |
| 50.45 | 1664.29 |
| 50.46 | 1230.88 |
| 50.47 | 1542.94 |
| 50.48 | 1404.25 |
| 50.49 | 1248.22 |
| 50.5  | 1265.56 |
| 50.51 | 1178.87 |
| 50.52 | 1438.92 |
| 50.53 | 1334.9  |
| 50.54 | 1092.19 |
| 50.55 | 1248.22 |
| 50.56 | 1230.88 |
| 50.57 | 1369.57 |
| 50.58 | 1352.24 |
| 50.59 | 1369.57 |
| 50.6  | 1352.24 |
| 50.61 | 1213.55 |
| 50.62 | 1473.59 |
| 50.63 | 1404.25 |
| 50.64 | 1560.27 |
| 50.65 | 1490.93 |
| 50.66 | 1681.63 |
| 50.67 | 1577.61 |
| 50.68 | 1716.3  |
| 50.69 | 1161.54 |



|       |         |
|-------|---------|
| 50.7  | 1438.92 |
| 50.71 | 1542.94 |
| 50.72 | 1473.59 |
| 50.73 | 1664.29 |
| 50.74 | 1352.24 |
| 50.75 | 1473.59 |
| 50.76 | 1369.57 |
| 50.77 | 1594.95 |
| 50.78 | 1733.64 |
| 50.79 | 1733.64 |
| 50.8  | 1768.31 |
| 50.81 | 1681.63 |
| 50.82 | 1508.26 |
| 50.83 | 1664.29 |
| 50.84 | 1664.29 |
| 50.85 | 1646.96 |
| 50.86 | 1456.26 |
| 50.87 | 1490.93 |
| 50.88 | 1525.6  |
| 50.89 | 1612.28 |
| 50.9  | 1594.95 |
| 50.91 | 1594.95 |
| 50.92 | 1629.62 |
| 50.93 | 1525.6  |
| 50.94 | 1525.6  |
| 50.95 | 1438.92 |
| 50.96 | 1560.27 |
| 50.97 | 1629.62 |
| 50.98 | 1785.65 |
| 50.99 | 1490.93 |
| 51    | 1854.99 |
| 51.01 | 1941.67 |
| 51.02 | 1629.62 |
| 51.03 | 2045.69 |
| 51.04 | 1698.96 |
| 51.05 | 1577.61 |
| 51.06 | 1907    |
| 51.07 | 2063.03 |
| 51.08 | 1802.98 |
| 51.09 | 1854.99 |
| 51.1  | 1334.9  |
| 51.11 | 1577.61 |
| 51.12 | 1768.31 |
| 51.13 | 1542.94 |

|       |         |
|-------|---------|
| 51.14 | 1612.28 |
| 51.15 | 1334.9  |
| 51.16 | 1594.95 |
| 51.17 | 1629.62 |
| 51.18 | 1265.56 |
| 51.19 | 1594.95 |
| 51.2  | 1577.61 |
| 51.21 | 1334.9  |
| 51.22 | 1473.59 |
| 51.23 | 1577.61 |
| 51.24 | 1473.59 |
| 51.25 | 1230.88 |
| 51.26 | 1317.56 |
| 51.27 | 1386.91 |
| 51.28 | 1109.53 |
| 51.29 | 1178.87 |
| 51.3  | 1629.62 |
| 51.31 | 1334.9  |
| 51.32 | 1196.21 |
| 51.33 | 1334.9  |
| 51.34 | 1230.88 |
| 51.35 | 1230.88 |
| 51.36 | 1508.26 |
| 51.37 | 1508.26 |
| 51.38 | 1282.89 |
| 51.39 | 1542.94 |
| 51.4  | 1386.91 |
| 51.41 | 1334.9  |
| 51.42 | 1646.96 |
| 51.43 | 1525.6  |
| 51.44 | 1300.23 |
| 51.45 | 1178.87 |
| 51.46 | 1421.58 |
| 51.47 | 1594.95 |
| 51.48 | 1282.89 |
| 51.49 | 1230.88 |
| 51.5  | 1334.9  |
| 51.51 | 1352.24 |
| 51.52 | 1421.58 |
| 51.53 | 1317.56 |
| 51.54 | 1438.92 |
| 51.55 | 1300.23 |
| 51.56 | 1161.54 |
| 51.57 | 1369.57 |

|       |         |
|-------|---------|
| 51.58 | 1421.58 |
| 51.59 | 1109.53 |
| 51.6  | 1473.59 |
| 51.61 | 953.5   |
| 51.62 | 1248.22 |
| 51.63 | 1386.91 |
| 51.64 | 1438.92 |
| 51.65 | 1196.21 |
| 51.66 | 1230.88 |
| 51.67 | 1248.22 |
| 51.68 | 1525.6  |
| 51.69 | 1421.58 |
| 51.7  | 1178.87 |
| 51.71 | 1300.23 |
| 51.72 | 1317.56 |
| 51.73 | 1178.87 |
| 51.74 | 1161.54 |
| 51.75 | 1196.21 |
| 51.76 | 1161.54 |
| 51.77 | 1265.56 |
| 51.78 | 1421.58 |
| 51.79 | 1057.52 |
| 51.8  | 1334.9  |
| 51.81 | 1386.91 |
| 51.82 | 1352.24 |
| 51.83 | 1369.57 |
| 51.84 | 1230.88 |
| 51.85 | 1074.85 |
| 51.86 | 1404.25 |
| 51.87 | 1196.21 |
| 51.88 | 832.146 |
| 51.89 | 918.828 |
| 51.9  | 1317.56 |
| 51.91 | 1196.21 |
| 51.92 | 1213.55 |
| 51.93 | 1161.54 |
| 51.94 | 1213.55 |
| 51.95 | 1456.26 |
| 51.96 | 1300.23 |
| 51.97 | 1161.54 |
| 51.98 | 1092.19 |
| 51.99 | 1352.24 |
| 52    | 1438.92 |
| 52.01 | 1057.52 |

|       |         |
|-------|---------|
| 52.02 | 1421.58 |
| 52.03 | 1092.19 |
| 52.04 | 1386.91 |
| 52.05 | 1178.87 |
| 52.06 | 1265.56 |
| 52.07 | 1282.89 |
| 52.08 | 1265.56 |
| 52.09 | 1248.22 |
| 52.1  | 1109.53 |
| 52.11 | 1040.18 |
| 52.12 | 1092.19 |
| 52.13 | 1074.85 |
| 52.14 | 1144.2  |
| 52.15 | 1525.6  |
| 52.16 | 1092.19 |
| 52.17 | 1144.2  |
| 52.18 | 1352.24 |
| 52.19 | 1161.54 |
| 52.2  | 1265.56 |
| 52.21 | 1144.2  |
| 52.22 | 1473.59 |
| 52.23 | 1213.55 |
| 52.24 | 1213.55 |
| 52.25 | 1421.58 |
| 52.26 | 1317.56 |
| 52.27 | 1265.56 |
| 52.28 | 1161.54 |
| 52.29 | 1300.23 |
| 52.3  | 1265.56 |
| 52.31 | 1057.52 |
| 52.32 | 953.5   |
| 52.33 | 1196.21 |
| 52.34 | 1230.88 |
| 52.35 | 1109.53 |
| 52.36 | 988.173 |
| 52.37 | 1092.19 |
| 52.38 | 1144.2  |
| 52.39 | 1282.89 |
| 52.4  | 1178.87 |
| 52.41 | 1144.2  |
| 52.42 | 1300.23 |
| 52.43 | 1386.91 |
| 52.44 | 1490.93 |
| 52.45 | 1438.92 |

|       |         |
|-------|---------|
| 52.46 | 1404.25 |
| 52.47 | 1230.88 |
| 52.48 | 1334.9  |
| 52.49 | 1109.53 |
| 52.5  | 1109.53 |
| 52.51 | 1265.56 |
| 52.52 | 1178.87 |
| 52.53 | 1074.85 |
| 52.54 | 1092.19 |
| 52.55 | 1109.53 |
| 52.56 | 1230.88 |
| 52.57 | 1144.2  |
| 52.58 | 1126.86 |
| 52.59 | 1178.87 |
| 52.6  | 1230.88 |
| 52.61 | 1144.2  |
| 52.62 | 953.5   |
| 52.63 | 953.5   |
| 52.64 | 1300.23 |
| 52.65 | 1317.56 |
| 52.66 | 1248.22 |
| 52.67 | 1230.88 |
| 52.68 | 1092.19 |
| 52.69 | 970.837 |
| 52.7  | 1248.22 |
| 52.71 | 1213.55 |
| 52.72 | 1334.9  |
| 52.73 | 1525.6  |
| 52.74 | 1213.55 |
| 52.75 | 1178.87 |
| 52.76 | 1300.23 |
| 52.77 | 1421.58 |
| 52.78 | 1178.87 |
| 52.79 | 1317.56 |
| 52.8  | 1126.86 |
| 52.81 | 1612.28 |
| 52.82 | 1230.88 |
| 52.83 | 1300.23 |
| 52.84 | 1369.57 |
| 52.85 | 1057.52 |
| 52.86 | 970.837 |
| 52.87 | 1230.88 |
| 52.88 | 1265.56 |
| 52.89 | 1109.53 |

|       |         |
|-------|---------|
| 52.9  | 1022.85 |
| 52.91 | 1317.56 |
| 52.92 | 1109.53 |
| 52.93 | 1196.21 |
| 52.94 | 1161.54 |
| 52.95 | 1317.56 |
| 52.96 | 1369.57 |
| 52.97 | 1213.55 |
| 52.98 | 1022.85 |
| 52.99 | 1144.2  |
| 53    | 918.828 |
| 53.01 | 1161.54 |
| 53.02 | 1022.85 |
| 53.03 | 1230.88 |
| 53.04 | 1109.53 |
| 53.05 | 1317.56 |
| 53.06 | 1109.53 |
| 53.07 | 1248.22 |
| 53.08 | 1126.86 |
| 53.09 | 1300.23 |
| 53.1  | 1300.23 |
| 53.11 | 1334.9  |
| 53.12 | 1248.22 |
| 53.13 | 1057.52 |
| 53.14 | 1126.86 |
| 53.15 | 1213.55 |
| 53.16 | 1300.23 |
| 53.17 | 1057.52 |
| 53.18 | 1265.56 |
| 53.19 | 1404.25 |
| 53.2  | 1074.85 |
| 53.21 | 1161.54 |
| 53.22 | 1161.54 |
| 53.23 | 1109.53 |
| 53.24 | 1230.88 |
| 53.25 | 1196.21 |
| 53.26 | 1196.21 |
| 53.27 | 1074.85 |
| 53.28 | 1109.53 |
| 53.29 | 1161.54 |
| 53.3  | 1040.18 |
| 53.31 | 1352.24 |
| 53.32 | 1074.85 |
| 53.33 | 1126.86 |

53.34 1161.54  
53.35 1144.2  
53.36 1057.52  
53.37 1178.87  
53.38 884.155  
53.39 988.173  
53.4 1178.87  
53.41 936.164  
53.42 1178.87  
53.43 1092.19  
53.44 1005.51  
53.45 988.173  
53.46 1196.21  
53.47 1196.21  
53.48 918.828  
53.49 1300.23  
53.5 970.837  
53.51 1109.53  
53.52 1057.52  
53.53 1161.54  
53.54 1092.19  
53.55 1074.85  
53.56 1040.18  
53.57 1178.87  
53.58 1144.2  
53.59 1230.88  
53.6 1178.87  
53.61 1057.52  
53.62 1074.85  
53.63 1404.25  
53.64 1317.56  
53.65 1230.88  
53.66 1144.2  
53.67 1317.56  
53.68 988.173  
53.69 970.837  
53.7 849.482  
53.71 1300.23  
53.72 1213.55  
53.73 1074.85  
53.74 1109.53  
53.75 1178.87  
53.76 953.5  
53.77 1092.19

|       |         |
|-------|---------|
| 53.78 | 936.164 |
| 53.79 | 1300.23 |
| 53.8  | 1126.86 |
| 53.81 | 1057.52 |
| 53.82 | 1057.52 |
| 53.83 | 1022.85 |
| 53.84 | 1317.56 |
| 53.85 | 988.173 |
| 53.86 | 918.828 |
| 53.87 | 1144.2  |
| 53.88 | 1300.23 |
| 53.89 | 1265.56 |
| 53.9  | 1178.87 |
| 53.91 | 1109.53 |
| 53.92 | 1144.2  |
| 53.93 | 1092.19 |
| 53.94 | 1144.2  |
| 53.95 | 1178.87 |
| 53.96 | 1334.9  |
| 53.97 | 1109.53 |
| 53.98 | 1265.56 |
| 53.99 | 1265.56 |
| 54    | 988.173 |
| 54.01 | 1230.88 |
| 54.02 | 1161.54 |
| 54.03 | 1196.21 |
| 54.04 | 1092.19 |
| 54.05 | 1126.86 |
| 54.06 | 1126.86 |
| 54.07 | 1265.56 |
| 54.08 | 1057.52 |
| 54.09 | 1057.52 |
| 54.1  | 1074.85 |
| 54.11 | 1144.2  |
| 54.12 | 953.5   |
| 54.13 | 1161.54 |
| 54.14 | 1022.85 |
| 54.15 | 970.837 |
| 54.16 | 1022.85 |
| 54.17 | 1022.85 |
| 54.18 | 1196.21 |
| 54.19 | 1178.87 |
| 54.2  | 1213.55 |
| 54.21 | 1092.19 |



|       |         |
|-------|---------|
| 54.22 | 1317.56 |
| 54.23 | 1213.55 |
| 54.24 | 1282.89 |
| 54.25 | 1352.24 |
| 54.26 | 1178.87 |
| 54.27 | 1092.19 |
| 54.28 | 1126.86 |
| 54.29 | 1317.56 |
| 54.3  | 1196.21 |
| 54.31 | 1022.85 |
| 54.32 | 1144.2  |
| 54.33 | 1109.53 |
| 54.34 | 1057.52 |
| 54.35 | 1022.85 |
| 54.36 | 1005.51 |
| 54.37 | 1161.54 |
| 54.38 | 936.164 |
| 54.39 | 936.164 |
| 54.4  | 1196.21 |
| 54.41 | 1074.85 |
| 54.42 | 832.146 |
| 54.43 | 1144.2  |
| 54.44 | 1144.2  |
| 54.45 | 970.837 |
| 54.46 | 1109.53 |
| 54.47 | 1092.19 |
| 54.48 | 1126.86 |
| 54.49 | 1178.87 |
| 54.5  | 1005.51 |
| 54.51 | 1265.56 |
| 54.52 | 1404.25 |
| 54.53 | 1040.18 |
| 54.54 | 1092.19 |
| 54.55 | 1300.23 |
| 54.56 | 1022.85 |
| 54.57 | 1074.85 |
| 54.58 | 1005.51 |
| 54.59 | 988.173 |
| 54.6  | 970.837 |
| 54.61 | 918.828 |
| 54.62 | 1282.89 |
| 54.63 | 1196.21 |
| 54.64 | 1144.2  |
| 54.65 | 1109.53 |

|       |         |
|-------|---------|
| 54.66 | 1213.55 |
| 54.67 | 936.164 |
| 54.68 | 1161.54 |
| 54.69 | 988.173 |
| 54.7  | 1126.86 |
| 54.71 | 1161.54 |
| 54.72 | 1074.85 |
| 54.73 | 1144.2  |
| 54.74 | 1040.18 |
| 54.75 | 970.837 |
| 54.76 | 970.837 |
| 54.77 | 866.819 |
| 54.78 | 1369.57 |
| 54.79 | 1005.51 |
| 54.8  | 1057.52 |
| 54.81 | 1248.22 |
| 54.82 | 936.164 |
| 54.83 | 1196.21 |
| 54.84 | 1196.21 |
| 54.85 | 1317.56 |
| 54.86 | 1092.19 |
| 54.87 | 1109.53 |
| 54.88 | 1057.52 |
| 54.89 | 1092.19 |
| 54.9  | 1040.18 |
| 54.91 | 1005.51 |
| 54.92 | 1161.54 |
| 54.93 | 918.828 |
| 54.94 | 1022.85 |
| 54.95 | 901.491 |
| 54.96 | 1230.88 |
| 54.97 | 1005.51 |
| 54.98 | 1265.56 |
| 54.99 | 953.5   |
| 55    | 1005.51 |
| 55.01 | 1178.87 |
| 55.02 | 953.5   |
| 55.03 | 1057.52 |
| 55.04 | 866.819 |
| 55.05 | 1057.52 |
| 55.06 | 1196.21 |
| 55.07 | 884.155 |
| 55.08 | 1126.86 |
| 55.09 | 1178.87 |

|       |         |
|-------|---------|
| 55.1  | 1144.2  |
| 55.11 | 988.173 |
| 55.12 | 1074.85 |
| 55.13 | 1230.88 |
| 55.14 | 988.173 |
| 55.15 | 1074.85 |
| 55.16 | 1248.22 |
| 55.17 | 1334.9  |
| 55.18 | 1161.54 |
| 55.19 | 1282.89 |
| 55.2  | 1317.56 |
| 55.21 | 866.819 |
| 55.22 | 970.837 |
| 55.23 | 1057.52 |
| 55.24 | 1230.88 |
| 55.25 | 1109.53 |
| 55.26 | 1057.52 |
| 55.27 | 901.491 |
| 55.28 | 1126.86 |
| 55.29 | 1040.18 |
| 55.3  | 988.173 |
| 55.31 | 1196.21 |
| 55.32 | 1040.18 |
| 55.33 | 1178.87 |
| 55.34 | 970.837 |
| 55.35 | 1248.22 |
| 55.36 | 936.164 |
| 55.37 | 918.828 |
| 55.38 | 832.146 |
| 55.39 | 814.809 |
| 55.4  | 970.837 |
| 55.41 | 1178.87 |
| 55.42 | 1161.54 |
| 55.43 | 1282.89 |
| 55.44 | 1178.87 |
| 55.45 | 1213.55 |
| 55.46 | 1213.55 |
| 55.47 | 1317.56 |
| 55.48 | 1126.86 |
| 55.49 | 1057.52 |
| 55.5  | 866.819 |
| 55.51 | 1126.86 |
| 55.52 | 1057.52 |
| 55.53 | 1230.88 |

|       |         |
|-------|---------|
| 55.54 | 1022.85 |
| 55.55 | 1144.2  |
| 55.56 | 1040.18 |
| 55.57 | 1248.22 |
| 55.58 | 1386.91 |
| 55.59 | 1074.85 |
| 55.6  | 1074.85 |
| 55.61 | 970.837 |
| 55.62 | 1057.52 |
| 55.63 | 1178.87 |
| 55.64 | 988.173 |
| 55.65 | 953.5   |
| 55.66 | 970.837 |
| 55.67 | 1230.88 |
| 55.68 | 1369.57 |
| 55.69 | 1300.23 |
| 55.7  | 1178.87 |
| 55.71 | 1178.87 |
| 55.72 | 953.5   |
| 55.73 | 1248.22 |
| 55.74 | 1230.88 |
| 55.75 | 918.828 |
| 55.76 | 1022.85 |
| 55.77 | 1074.85 |
| 55.78 | 1196.21 |
| 55.79 | 1161.54 |
| 55.8  | 1178.87 |
| 55.81 | 1022.85 |
| 55.82 | 1109.53 |
| 55.83 | 1213.55 |
| 55.84 | 1213.55 |
| 55.85 | 1230.88 |
| 55.86 | 901.491 |
| 55.87 | 1092.19 |
| 55.88 | 1196.21 |
| 55.89 | 901.491 |
| 55.9  | 970.837 |
| 55.91 | 1022.85 |
| 55.92 | 936.164 |
| 55.93 | 1109.53 |
| 55.94 | 1109.53 |
| 55.95 | 1248.22 |
| 55.96 | 1161.54 |
| 55.97 | 1213.55 |

|       |         |
|-------|---------|
| 55.98 | 1404.25 |
| 55.99 | 1282.89 |
| 56    | 1109.53 |
| 56.01 | 1092.19 |
| 56.02 | 1126.86 |
| 56.03 | 936.164 |
| 56.04 | 1178.87 |
| 56.05 | 1144.2  |
| 56.06 | 1074.85 |
| 56.07 | 1213.55 |
| 56.08 | 1144.2  |
| 56.09 | 1092.19 |
| 56.1  | 1230.88 |
| 56.11 | 1248.22 |
| 56.12 | 1213.55 |
| 56.13 | 1144.2  |
| 56.14 | 1092.19 |
| 56.15 | 1196.21 |
| 56.16 | 1213.55 |
| 56.17 | 1213.55 |
| 56.18 | 1074.85 |
| 56.19 | 1196.21 |
| 56.2  | 1109.53 |
| 56.21 | 1317.56 |
| 56.22 | 1178.87 |
| 56.23 | 1109.53 |
| 56.24 | 1022.85 |
| 56.25 | 1005.51 |
| 56.26 | 1057.52 |
| 56.27 | 953.5   |
| 56.28 | 1161.54 |
| 56.29 | 1057.52 |
| 56.3  | 1334.9  |
| 56.31 | 1300.23 |
| 56.32 | 1057.52 |
| 56.33 | 1074.85 |
| 56.34 | 1109.53 |
| 56.35 | 1161.54 |
| 56.36 | 1178.87 |
| 56.37 | 1248.22 |
| 56.38 | 1248.22 |
| 56.39 | 1161.54 |
| 56.4  | 1230.88 |
| 56.41 | 1092.19 |

|       |         |
|-------|---------|
| 56.42 | 1057.52 |
| 56.43 | 1161.54 |
| 56.44 | 1109.53 |
| 56.45 | 1178.87 |
| 56.46 | 1473.59 |
| 56.47 | 1369.57 |
| 56.48 | 1144.2  |
| 56.49 | 1542.94 |
| 56.5  | 1560.27 |
| 56.51 | 1456.26 |
| 56.52 | 1317.56 |
| 56.53 | 1456.26 |
| 56.54 | 1508.26 |
| 56.55 | 1438.92 |
| 56.56 | 1473.59 |
| 56.57 | 1854.99 |
| 56.58 | 1646.96 |
| 56.59 | 1993.68 |
| 56.6  | 1768.31 |
| 56.61 | 1820.32 |
| 56.62 | 1924.34 |
| 56.63 | 1993.68 |
| 56.64 | 2063.03 |
| 56.65 | 2253.73 |
| 56.66 | 2739.15 |
| 56.67 | 2617.79 |
| 56.68 | 2843.16 |
| 56.69 | 2912.51 |
| 56.7  | 3345.92 |
| 56.71 | 3207.23 |
| 56.72 | 3657.97 |
| 56.73 | 4056.71 |
| 56.74 | 3692.65 |
| 56.75 | 4247.41 |
| 56.76 | 5183.57 |
| 56.77 | 5235.58 |
| 56.78 | 4802.17 |
| 56.79 | 4559.47 |
| 56.8  | 4524.79 |
| 56.81 | 4784.84 |
| 56.82 | 4715.49 |
| 56.83 | 4906.19 |
| 56.84 | 4091.38 |
| 56.85 | 4472.78 |

|       |         |
|-------|---------|
| 56.86 | 3831.34 |
| 56.87 | 3467.27 |
| 56.88 | 3415.26 |
| 56.89 | 3311.25 |
| 56.9  | 3675.31 |
| 56.91 | 3380.59 |
| 56.92 | 3224.56 |
| 56.93 | 3900.68 |
| 56.94 | 3120.55 |
| 56.95 | 2981.86 |
| 56.96 | 3345.92 |
| 56.97 | 3397.93 |
| 56.98 | 3085.87 |
| 56.99 | 2756.48 |
| 57    | 2375.08 |
| 57.01 | 2479.1  |
| 57.02 | 2011.02 |
| 57.03 | 2479.1  |
| 57.04 | 2097.7  |
| 57.05 | 2028.36 |
| 57.06 | 2219.06 |
| 57.07 | 1594.95 |
| 57.08 | 1646.96 |
| 57.09 | 1681.63 |
| 57.1  | 1369.57 |
| 57.11 | 1872.33 |
| 57.12 | 1300.23 |
| 57.13 | 1092.19 |
| 57.14 | 1560.27 |
| 57.15 | 1768.31 |
| 57.16 | 1508.26 |
| 57.17 | 1456.26 |
| 57.18 | 1386.91 |
| 57.19 | 1525.6  |
| 57.2  | 1542.94 |
| 57.21 | 1386.91 |
| 57.22 | 1629.62 |
| 57.23 | 1664.29 |
| 57.24 | 1577.61 |
| 57.25 | 1300.23 |
| 57.26 | 1768.31 |
| 57.27 | 1560.27 |
| 57.28 | 1542.94 |
| 57.29 | 1577.61 |

|       |         |
|-------|---------|
| 57.3  | 1941.67 |
| 57.31 | 1854.99 |
| 57.32 | 1959.01 |
| 57.33 | 1664.29 |
| 57.34 | 1854.99 |
| 57.35 | 2409.76 |
| 57.36 | 1993.68 |
| 57.37 | 1941.67 |
| 57.38 | 2323.07 |
| 57.39 | 2184.38 |
| 57.4  | 2669.8  |
| 57.41 | 3155.22 |
| 57.42 | 2929.85 |
| 57.43 | 2895.17 |
| 57.44 | 3207.23 |
| 57.45 | 3571.29 |
| 57.46 | 3709.98 |
| 57.47 | 3970.03 |
| 57.48 | 4230.07 |
| 57.49 | 4975.54 |
| 57.5  | 5339.6  |
| 57.51 | 5582.31 |
| 57.52 | 5963.71 |
| 57.53 | 6674.5  |
| 57.54 | 7177.26 |
| 57.55 | 7541.32 |
| 57.56 | 8252.11 |
| 57.57 | 8581.5  |
| 57.58 | 8772.2  |
| 57.59 | 9812.39 |
| 57.6  | 11077.9 |
| 57.61 | 11199.3 |
| 57.62 | 11494   |
| 57.63 | 10921.9 |
| 57.64 | 11164.6 |
| 57.65 | 11130   |
| 57.66 | 9691.03 |
| 57.67 | 10644.5 |
| 57.68 | 9587.01 |
| 57.69 | 9448.32 |
| 57.7  | 8737.53 |
| 57.71 | 8529.49 |
| 57.72 | 7593.33 |
| 57.73 | 7922.72 |



|       |         |
|-------|---------|
| 57.74 | 8234.78 |
| 57.75 | 7523.98 |
| 57.76 | 7853.38 |
| 57.77 | 7697.35 |
| 57.78 | 7177.26 |
| 57.79 | 6795.86 |
| 57.8  | 6743.85 |
| 57.81 | 6535.81 |
| 57.82 | 6015.72 |
| 57.83 | 5235.58 |
| 57.84 | 5096.89 |
| 57.85 | 4854.18 |
| 57.86 | 3970.03 |
| 57.87 | 3432.6  |
| 57.88 | 3657.97 |
| 57.89 | 3397.93 |
| 57.9  | 3137.88 |
| 57.91 | 3016.53 |
| 57.92 | 2704.47 |
| 57.93 | 2375.08 |
| 57.94 | 2323.07 |
| 57.95 | 2288.4  |
| 57.96 | 2340.41 |
| 57.97 | 2167.05 |
| 57.98 | 2045.69 |
| 57.99 | 1941.67 |
| 58    | 2288.4  |
| 58.01 | 2063.03 |
| 58.02 | 1993.68 |
| 58.03 | 1785.65 |
| 58.04 | 2132.37 |
| 58.05 | 1733.64 |
| 58.06 | 2115.04 |
| 58.07 | 2340.41 |
| 58.08 | 1872.33 |
| 58.09 | 2028.36 |
| 58.1  | 2028.36 |
| 58.11 | 2097.7  |
| 58.12 | 1959.01 |
| 58.13 | 1993.68 |
| 58.14 | 1785.65 |
| 58.15 | 1629.62 |
| 58.16 | 1837.66 |
| 58.17 | 2219.06 |

|       |         |
|-------|---------|
| 58.18 | 2444.43 |
| 58.19 | 2392.42 |
| 58.2  | 2132.37 |
| 58.21 | 2028.36 |
| 58.22 | 2080.36 |
| 58.23 | 2340.41 |
| 58.24 | 2340.41 |
| 58.25 | 2756.48 |
| 58.26 | 2929.85 |
| 58.27 | 2565.78 |
| 58.28 | 2565.78 |
| 58.29 | 2461.76 |
| 58.3  | 2513.77 |
| 58.31 | 2409.76 |
| 58.32 | 2219.06 |
| 58.33 | 2496.44 |
| 58.34 | 2305.74 |
| 58.35 | 2392.42 |
| 58.36 | 2669.8  |
| 58.37 | 1941.67 |
| 58.38 | 2132.37 |
| 58.39 | 2271.06 |
| 58.4  | 1854.99 |
| 58.41 | 2236.39 |
| 58.42 | 2028.36 |
| 58.43 | 2357.75 |
| 58.44 | 1959.01 |
| 58.45 | 1941.67 |
| 58.46 | 1802.98 |
| 58.47 | 1716.3  |
| 58.48 | 1907    |
| 58.49 | 1664.29 |
| 58.5  | 1612.28 |
| 58.51 | 1612.28 |
| 58.52 | 1664.29 |
| 58.53 | 1386.91 |
| 58.54 | 1144.2  |
| 58.55 | 1300.23 |
| 58.56 | 1404.25 |
| 58.57 | 1248.22 |
| 58.58 | 1490.93 |
| 58.59 | 1265.56 |
| 58.6  | 1126.86 |
| 58.61 | 1282.89 |

|       |         |
|-------|---------|
| 58.62 | 1386.91 |
| 58.63 | 1230.88 |
| 58.64 | 1161.54 |
| 58.65 | 1109.53 |
| 58.66 | 1404.25 |
| 58.67 | 1369.57 |
| 58.68 | 1057.52 |
| 58.69 | 1230.88 |
| 58.7  | 1282.89 |
| 58.71 | 1074.85 |
| 58.72 | 1230.88 |
| 58.73 | 884.155 |
| 58.74 | 1005.51 |
| 58.75 | 1161.54 |
| 58.76 | 1126.86 |
| 58.77 | 1005.51 |
| 58.78 | 953.5   |
| 58.79 | 1126.86 |
| 58.8  | 953.5   |
| 58.81 | 1022.85 |
| 58.82 | 1092.19 |
| 58.83 | 953.5   |
| 58.84 | 1230.88 |
| 58.85 | 866.819 |
| 58.86 | 1057.52 |
| 58.87 | 1161.54 |
| 58.88 | 1144.2  |
| 58.89 | 1144.2  |
| 58.9  | 1005.51 |
| 58.91 | 1196.21 |
| 58.92 | 1282.89 |
| 58.93 | 988.173 |
| 58.94 | 1074.85 |
| 58.95 | 970.837 |
| 58.96 | 1213.55 |
| 58.97 | 1005.51 |
| 58.98 | 936.164 |
| 58.99 | 1178.87 |
| 59    | 1092.19 |
| 59.01 | 1092.19 |
| 59.02 | 1386.91 |
| 59.03 | 1230.88 |
| 59.04 | 953.5   |
| 59.05 | 1352.24 |

|       |         |
|-------|---------|
| 59.06 | 1074.85 |
| 59.07 | 1300.23 |
| 59.08 | 1317.56 |
| 59.09 | 1352.24 |
| 59.1  | 1213.55 |
| 59.11 | 1248.22 |
| 59.12 | 1369.57 |
| 59.13 | 1126.86 |
| 59.14 | 1144.2  |
| 59.15 | 1057.52 |
| 59.16 | 1126.86 |
| 59.17 | 936.164 |
| 59.18 | 1109.53 |
| 59.19 | 1352.24 |
| 59.2  | 1300.23 |
| 59.21 | 1109.53 |
| 59.22 | 1040.18 |
| 59.23 | 1057.52 |
| 59.24 | 1074.85 |
| 59.25 | 1092.19 |
| 59.26 | 1196.21 |
| 59.27 | 1092.19 |
| 59.28 | 936.164 |
| 59.29 | 936.164 |
| 59.3  | 1265.56 |
| 59.31 | 814.809 |
| 59.32 | 1213.55 |
| 59.33 | 1300.23 |
| 59.34 | 970.837 |
| 59.35 | 1074.85 |
| 59.36 | 1022.85 |
| 59.37 | 1144.2  |
| 59.38 | 953.5   |
| 59.39 | 901.491 |
| 59.4  | 1161.54 |
| 59.41 | 1213.55 |
| 59.42 | 1005.51 |
| 59.43 | 1213.55 |
| 59.44 | 1161.54 |
| 59.45 | 970.837 |
| 59.46 | 936.164 |
| 59.47 | 1144.2  |
| 59.48 | 1022.85 |
| 59.49 | 953.5   |

59.5 1040.18  
59.51 1196.21  
59.52 1126.86  
59.53 1248.22  
59.54 1092.19  
59.55 970.837  
59.56 1092.19  
59.57 1126.86  
59.58 1369.57  
59.59 1040.18  
59.6 1005.51  
59.61 1213.55  
59.62 918.828  
59.63 1022.85  
59.64 1022.85  
59.65 1092.19  
59.66 1057.52  
59.67 1369.57  
59.68 1022.85  
59.69 1057.52  
59.7 970.837  
59.71 1213.55  
59.72 1213.55  
59.73 970.837  
59.74 1109.53  
59.75 849.482  
59.76 884.155  
59.77 1144.2  
59.78 1109.53  
59.79 1126.86  
59.8 1074.85  
59.81 1074.85  
59.82 1074.85  
59.83 1040.18  
59.84 1265.56  
59.85 1074.85  
59.86 1022.85  
59.87 1178.87  
59.88 1213.55  
59.89 1057.52  
59.9 1230.88  
59.91 1438.92  
59.92 1040.18  
59.93 970.837

|       |         |
|-------|---------|
| 59.94 | 1178.87 |
| 59.95 | 1196.21 |
| 59.96 | 1369.57 |
| 59.97 | 1144.2  |
| 59.98 | 953.5   |
| 59.99 | 1196.21 |
| 60    | 641.446 |
| 60.01 | 1334.9  |
| 60.02 | 1248.22 |
| 60.03 | 1022.85 |
| 60.04 | 1005.51 |
| 60.05 | 1213.55 |
| 60.06 | 1057.52 |
| 60.07 | 1282.89 |
| 60.08 | 1126.86 |
| 60.09 | 936.164 |
| 60.1  | 936.164 |
| 60.11 | 970.837 |
| 60.12 | 988.173 |
| 60.13 | 814.809 |
| 60.14 | 797.473 |
| 60.15 | 1126.86 |
| 60.16 | 901.491 |
| 60.17 | 1022.85 |
| 60.18 | 866.819 |
| 60.19 | 901.491 |
| 60.2  | 866.819 |
| 60.21 | 988.173 |
| 60.22 | 988.173 |
| 60.23 | 884.155 |
| 60.24 | 1161.54 |
| 60.25 | 1126.86 |
| 60.26 | 866.819 |
| 60.27 | 1005.51 |
| 60.28 | 1126.86 |
| 60.29 | 970.837 |
| 60.3  | 849.482 |
| 60.31 | 1005.51 |
| 60.32 | 884.155 |
| 60.33 | 1074.85 |
| 60.34 | 918.828 |
| 60.35 | 953.5   |
| 60.36 | 1092.19 |
| 60.37 | 866.819 |

|       |         |
|-------|---------|
| 60.38 | 832.146 |
| 60.39 | 936.164 |
| 60.4  | 1005.51 |
| 60.41 | 1092.19 |
| 60.42 | 1022.85 |
| 60.43 | 1074.85 |
| 60.44 | 1109.53 |
| 60.45 | 1161.54 |
| 60.46 | 1057.52 |
| 60.47 | 1404.25 |
| 60.48 | 970.837 |
| 60.49 | 1196.21 |
| 60.5  | 918.828 |
| 60.51 | 1334.9  |
| 60.52 | 1369.57 |
| 60.53 | 1057.52 |
| 60.54 | 1282.89 |
| 60.55 | 1560.27 |
| 60.56 | 1213.55 |
| 60.57 | 1386.91 |
| 60.58 | 1386.91 |
| 60.59 | 1352.24 |
| 60.6  | 1213.55 |
| 60.61 | 1265.56 |
| 60.62 | 1681.63 |
| 60.63 | 1438.92 |
| 60.64 | 1646.96 |
| 60.65 | 1542.94 |
| 60.66 | 1889.66 |
| 60.67 | 1577.61 |
| 60.68 | 1924.34 |
| 60.69 | 2080.36 |
| 60.7  | 2323.07 |
| 60.71 | 2548.45 |
| 60.72 | 2340.41 |
| 60.73 | 2600.46 |
| 60.74 | 2808.49 |
| 60.75 | 2981.86 |
| 60.76 | 3363.26 |
| 60.77 | 3675.31 |
| 60.78 | 3796.67 |
| 60.79 | 4108.72 |
| 60.8  | 4420.77 |
| 60.81 | 4923.53 |

|       |         |
|-------|---------|
| 60.82 | 4958.2  |
| 60.83 | 5356.94 |
| 60.84 | 6310.44 |
| 60.85 | 6362.45 |
| 60.86 | 6605.16 |
| 60.87 | 7177.26 |
| 60.88 | 7263.94 |
| 60.89 | 7974.73 |
| 60.9  | 7853.38 |
| 60.91 | 7003.89 |
| 60.92 | 6587.82 |
| 60.93 | 6795.86 |
| 60.94 | 6587.82 |
| 60.95 | 6449.13 |
| 60.96 | 5634.32 |
| 60.97 | 5443.62 |
| 60.98 | 5183.57 |
| 60.99 | 5096.89 |
| 61    | 5721    |
| 61.01 | 4958.2  |
| 61.02 | 5582.31 |
| 61.03 | 5825.02 |
| 61.04 | 5755.67 |
| 61.05 | 5929.04 |
| 61.06 | 6085.07 |
| 61.07 | 5114.23 |
| 61.08 | 5478.29 |
| 61.09 | 5044.88 |
| 61.1  | 5270.26 |
| 61.11 | 5322.27 |
| 61.12 | 4767.5  |
| 61.13 | 4732.83 |
| 61.14 | 5044.88 |
| 61.15 | 4750.17 |
| 61.16 | 4663.48 |
| 61.17 | 4819.51 |
| 61.18 | 4836.85 |
| 61.19 | 4819.51 |
| 61.2  | 4524.79 |
| 61.21 | 5079.56 |
| 61.22 | 4715.49 |
| 61.23 | 4524.79 |
| 61.24 | 4264.75 |
| 61.25 | 4195.4  |



|       |         |
|-------|---------|
| 61.26 | 4316.76 |
| 61.27 | 3588.63 |
| 61.28 | 3536.62 |
| 61.29 | 3744.66 |
| 61.3  | 3605.97 |
| 61.31 | 3363.26 |
| 61.32 | 3259.24 |
| 61.33 | 3241.9  |
| 61.34 | 3779.33 |
| 61.35 | 3432.6  |
| 61.36 | 3900.68 |
| 61.37 | 3848.67 |
| 61.38 | 4004.7  |
| 61.39 | 3588.63 |
| 61.4  | 3848.67 |
| 61.41 | 3761.99 |
| 61.42 | 3779.33 |
| 61.43 | 3900.68 |
| 61.44 | 2929.85 |
| 61.45 | 3692.65 |
| 61.46 | 3241.9  |
| 61.47 | 3051.2  |
| 61.48 | 3675.31 |
| 61.49 | 3588.63 |
| 61.5  | 3866.01 |
| 61.51 | 4004.7  |
| 61.52 | 4143.39 |
| 61.53 | 4334.09 |
| 61.54 | 4351.43 |
| 61.55 | 4524.79 |
| 61.56 | 4264.75 |
| 61.57 | 4299.42 |
| 61.58 | 4854.18 |
| 61.59 | 4906.19 |
| 61.6  | 4819.51 |
| 61.61 | 4576.8  |
| 61.62 | 4247.41 |
| 61.63 | 4264.75 |
| 61.64 | 4108.72 |
| 61.65 | 3484.61 |
| 61.66 | 3241.9  |
| 61.67 | 3380.59 |
| 61.68 | 3189.89 |
| 61.69 | 2843.16 |

|       |         |
|-------|---------|
| 61.7  | 2895.17 |
| 61.71 | 3363.26 |
| 61.72 | 3016.53 |
| 61.73 | 2843.16 |
| 61.74 | 3276.57 |
| 61.75 | 2721.81 |
| 61.76 | 2947.18 |
| 61.77 | 2825.83 |
| 61.78 | 2600.46 |
| 61.79 | 2791.16 |
| 61.8  | 2652.46 |
| 61.81 | 2583.12 |
| 61.82 | 2340.41 |
| 61.83 | 2201.72 |
| 61.84 | 2011.02 |
| 61.85 | 1716.3  |
| 61.86 | 1716.3  |
| 61.87 | 1733.64 |
| 61.88 | 1490.93 |
| 61.89 | 1525.6  |
| 61.9  | 1646.96 |
| 61.91 | 1438.92 |
| 61.92 | 1369.57 |
| 61.93 | 1438.92 |
| 61.94 | 1577.61 |
| 61.95 | 1230.88 |
| 61.96 | 1456.26 |
| 61.97 | 1438.92 |
| 61.98 | 1421.58 |
| 61.99 | 1161.54 |
| 62    | 1057.52 |
| 62.01 | 1144.2  |
| 62.02 | 1508.26 |
| 62.03 | 1386.91 |
| 62.04 | 1248.22 |
| 62.05 | 1144.2  |
| 62.06 | 1178.87 |
| 62.07 | 953.5   |
| 62.08 | 988.173 |
| 62.09 | 1456.26 |
| 62.1  | 1057.52 |
| 62.11 | 1144.2  |
| 62.12 | 1144.2  |
| 62.13 | 1126.86 |

|       |         |
|-------|---------|
| 62.14 | 1074.85 |
| 62.15 | 1300.23 |
| 62.16 | 1040.18 |
| 62.17 | 1144.2  |
| 62.18 | 1230.88 |
| 62.19 | 1126.86 |
| 62.2  | 1092.19 |
| 62.21 | 1126.86 |
| 62.22 | 1178.87 |
| 62.23 | 1352.24 |
| 62.24 | 918.828 |
| 62.25 | 1161.54 |
| 62.26 | 1352.24 |
| 62.27 | 1092.19 |
| 62.28 | 1022.85 |
| 62.29 | 1074.85 |
| 62.3  | 1109.53 |
| 62.31 | 1005.51 |
| 62.32 | 1022.85 |
| 62.33 | 1040.18 |
| 62.34 | 1022.85 |
| 62.35 | 1213.55 |
| 62.36 | 918.828 |
| 62.37 | 953.5   |
| 62.38 | 1213.55 |
| 62.39 | 1057.52 |
| 62.4  | 1005.51 |
| 62.41 | 832.146 |
| 62.42 | 1196.21 |
| 62.43 | 1092.19 |
| 62.44 | 1057.52 |
| 62.45 | 1005.51 |
| 62.46 | 988.173 |
| 62.47 | 936.164 |
| 62.48 | 1022.85 |
| 62.49 | 866.819 |
| 62.5  | 1248.22 |
| 62.51 | 988.173 |
| 62.52 | 1144.2  |
| 62.53 | 1092.19 |
| 62.54 | 953.5   |
| 62.55 | 1092.19 |
| 62.56 | 1144.2  |
| 62.57 | 1074.85 |

|       |         |
|-------|---------|
| 62.58 | 1248.22 |
| 62.59 | 1126.86 |
| 62.6  | 1300.23 |
| 62.61 | 901.491 |
| 62.62 | 1074.85 |
| 62.63 | 1230.88 |
| 62.64 | 1196.21 |
| 62.65 | 1040.18 |
| 62.66 | 1126.86 |
| 62.67 | 1161.54 |
| 62.68 | 1282.89 |
| 62.69 | 1040.18 |
| 62.7  | 1265.56 |
| 62.71 | 1248.22 |
| 62.72 | 1300.23 |
| 62.73 | 953.5   |
| 62.74 | 988.173 |
| 62.75 | 936.164 |
| 62.76 | 1265.56 |
| 62.77 | 1074.85 |
| 62.78 | 1161.54 |
| 62.79 | 1126.86 |
| 62.8  | 1248.22 |
| 62.81 | 1126.86 |
| 62.82 | 1092.19 |
| 62.83 | 1040.18 |
| 62.84 | 728.128 |
| 62.85 | 1005.51 |
| 62.86 | 1005.51 |
| 62.87 | 936.164 |
| 62.88 | 1144.2  |
| 62.89 | 1126.86 |
| 62.9  | 918.828 |
| 62.91 | 1040.18 |
| 62.92 | 1092.19 |
| 62.93 | 1022.85 |
| 62.94 | 970.837 |
| 62.95 | 1109.53 |
| 62.96 | 1248.22 |
| 62.97 | 1213.55 |
| 62.98 | 1213.55 |
| 62.99 | 1144.2  |
| 63    | 1196.21 |
| 63.01 | 1386.91 |

|       |         |
|-------|---------|
| 63.02 | 1022.85 |
| 63.03 | 1334.9  |
| 63.04 | 1300.23 |
| 63.05 | 1248.22 |
| 63.06 | 1161.54 |
| 63.07 | 1369.57 |
| 63.08 | 1126.86 |
| 63.09 | 1594.95 |
| 63.1  | 1681.63 |
| 63.11 | 1456.26 |
| 63.12 | 1664.29 |
| 63.13 | 1750.97 |
| 63.14 | 1768.31 |
| 63.15 | 1941.67 |
| 63.16 | 2011.02 |
| 63.17 | 2080.36 |
| 63.18 | 2149.71 |
| 63.19 | 2288.4  |
| 63.2  | 2115.04 |
| 63.21 | 2496.44 |
| 63.22 | 2652.46 |
| 63.23 | 2964.52 |
| 63.24 | 3068.54 |
| 63.25 | 2999.19 |
| 63.26 | 2791.16 |
| 63.27 | 3259.24 |
| 63.28 | 3484.61 |
| 63.29 | 3016.53 |
| 63.3  | 2999.19 |
| 63.31 | 2704.47 |
| 63.32 | 2652.46 |
| 63.33 | 2860.5  |
| 63.34 | 2825.83 |
| 63.35 | 2652.46 |
| 63.36 | 2357.75 |
| 63.37 | 2652.46 |
| 63.38 | 2080.36 |
| 63.39 | 2201.72 |
| 63.4  | 2253.73 |
| 63.41 | 2409.76 |
| 63.42 | 2340.41 |
| 63.43 | 2271.06 |
| 63.44 | 2565.78 |
| 63.45 | 2132.37 |

|       |         |
|-------|---------|
| 63.46 | 2219.06 |
| 63.47 | 2201.72 |
| 63.48 | 2340.41 |
| 63.49 | 2201.72 |
| 63.5  | 1941.67 |
| 63.51 | 1889.66 |
| 63.52 | 1768.31 |
| 63.53 | 1612.28 |
| 63.54 | 1854.99 |
| 63.55 | 1300.23 |
| 63.56 | 1369.57 |
| 63.57 | 1126.86 |
| 63.58 | 1109.53 |
| 63.59 | 1334.9  |
| 63.6  | 1490.93 |
| 63.61 | 1577.61 |
| 63.62 | 1317.56 |
| 63.63 | 1456.26 |
| 63.64 | 1126.86 |
| 63.65 | 1213.55 |
| 63.66 | 1109.53 |
| 63.67 | 1282.89 |
| 63.68 | 1230.88 |
| 63.69 | 1213.55 |
| 63.7  | 1248.22 |
| 63.71 | 1109.53 |
| 63.72 | 1040.18 |
| 63.73 | 1230.88 |
| 63.74 | 1317.56 |
| 63.75 | 1213.55 |
| 63.76 | 1265.56 |
| 63.77 | 1161.54 |
| 63.78 | 1126.86 |
| 63.79 | 1057.52 |
| 63.8  | 1144.2  |
| 63.81 | 988.173 |
| 63.82 | 1126.86 |
| 63.83 | 1057.52 |
| 63.84 | 1404.25 |
| 63.85 | 1352.24 |
| 63.86 | 1300.23 |
| 63.87 | 1109.53 |
| 63.88 | 1109.53 |
| 63.89 | 1109.53 |

|       |         |
|-------|---------|
| 63.9  | 1057.52 |
| 63.91 | 936.164 |
| 63.92 | 988.173 |
| 63.93 | 1126.86 |
| 63.94 | 1248.22 |
| 63.95 | 1109.53 |
| 63.96 | 970.837 |
| 63.97 | 1178.87 |
| 63.98 | 1057.52 |
| 63.99 | 1074.85 |
| 64    | 1230.88 |
| 64.01 | 1196.21 |
| 64.02 | 1040.18 |
| 64.03 | 849.482 |
| 64.04 | 1092.19 |
| 64.05 | 1057.52 |
| 64.06 | 1057.52 |
| 64.07 | 1196.21 |
| 64.08 | 1074.85 |
| 64.09 | 988.173 |
| 64.1  | 970.837 |
| 64.11 | 849.482 |
| 64.12 | 1109.53 |
| 64.13 | 1005.51 |
| 64.14 | 1282.89 |
| 64.15 | 1109.53 |
| 64.16 | 1196.21 |
| 64.17 | 1109.53 |
| 64.18 | 1161.54 |
| 64.19 | 1040.18 |
| 64.2  | 1144.2  |
| 64.21 | 866.819 |
| 64.22 | 1248.22 |
| 64.23 | 1161.54 |
| 64.24 | 1040.18 |
| 64.25 | 953.5   |
| 64.26 | 762.8   |
| 64.27 | 1178.87 |
| 64.28 | 1144.2  |
| 64.29 | 953.5   |
| 64.3  | 1005.51 |
| 64.31 | 970.837 |
| 64.32 | 1040.18 |
| 64.33 | 1022.85 |

|       |         |
|-------|---------|
| 64.34 | 780.137 |
| 64.35 | 1005.51 |
| 64.36 | 1126.86 |
| 64.37 | 953.5   |
| 64.38 | 918.828 |
| 64.39 | 1144.2  |
| 64.4  | 1144.2  |
| 64.41 | 1213.55 |
| 64.42 | 1126.86 |
| 64.43 | 814.809 |
| 64.44 | 901.491 |
| 64.45 | 1265.56 |
| 64.46 | 1074.85 |
| 64.47 | 1230.88 |
| 64.48 | 1213.55 |
| 64.49 | 1230.88 |
| 64.5  | 1092.19 |
| 64.51 | 1300.23 |
| 64.52 | 1265.56 |
| 64.53 | 1386.91 |
| 64.54 | 1265.56 |
| 64.55 | 1352.24 |
| 64.56 | 1230.88 |
| 64.57 | 1334.9  |
| 64.58 | 1248.22 |
| 64.59 | 1230.88 |
| 64.6  | 1594.95 |
| 64.61 | 1542.94 |
| 64.62 | 1768.31 |
| 64.63 | 1854.99 |
| 64.64 | 1629.62 |
| 64.65 | 1473.59 |
| 64.66 | 2184.38 |
| 64.67 | 1854.99 |
| 64.68 | 1872.33 |
| 64.69 | 2045.69 |
| 64.7  | 2496.44 |
| 64.71 | 2929.85 |
| 64.72 | 2791.16 |
| 64.73 | 2877.84 |
| 64.74 | 2999.19 |
| 64.75 | 3397.93 |
| 64.76 | 3605.97 |
| 64.77 | 3848.67 |



|       |         |
|-------|---------|
| 64.78 | 3744.66 |
| 64.79 | 4455.45 |
| 64.8  | 4854.18 |
| 64.81 | 5200.91 |
| 64.82 | 5703.67 |
| 64.83 | 5894.37 |
| 64.84 | 5963.71 |
| 64.85 | 7021.23 |
| 64.86 | 7055.9  |
| 64.87 | 7888.05 |
| 64.88 | 7159.92 |
| 64.89 | 6951.88 |
| 64.9  | 7315.95 |
| 64.91 | 6795.86 |
| 64.92 | 6345.11 |
| 64.93 | 6033.06 |
| 64.94 | 5790.35 |
| 64.95 | 5790.35 |
| 64.96 | 5200.91 |
| 64.97 | 4611.47 |
| 64.98 | 4888.86 |
| 64.99 | 5252.92 |
| 65    | 4975.54 |
| 65.01 | 4750.17 |
| 65.02 | 4420.77 |
| 65.03 | 4750.17 |
| 65.04 | 5270.26 |
| 65.05 | 4524.79 |
| 65.06 | 4906.19 |
| 65.07 | 4732.83 |
| 65.08 | 4576.8  |
| 65.09 | 4212.74 |
| 65.1  | 3727.32 |
| 65.11 | 3501.95 |
| 65.12 | 3397.93 |
| 65.13 | 3103.21 |
| 65.14 | 2895.17 |
| 65.15 | 2912.51 |
| 65.16 | 2773.82 |
| 65.17 | 2444.43 |
| 65.18 | 1976.35 |
| 65.19 | 2305.74 |
| 65.2  | 2340.41 |
| 65.21 | 1872.33 |

|       |         |
|-------|---------|
| 65.22 | 1889.66 |
| 65.23 | 1802.98 |
| 65.24 | 1872.33 |
| 65.25 | 1802.98 |
| 65.26 | 1646.96 |
| 65.27 | 2097.7  |
| 65.28 | 1508.26 |
| 65.29 | 1750.97 |
| 65.3  | 1560.27 |
| 65.31 | 1768.31 |
| 65.32 | 1369.57 |
| 65.33 | 1542.94 |
| 65.34 | 1404.25 |
| 65.35 | 1525.6  |
| 65.36 | 1282.89 |
| 65.37 | 1421.58 |
| 65.38 | 1629.62 |
| 65.39 | 1282.89 |
| 65.4  | 1421.58 |
| 65.41 | 1421.58 |
| 65.42 | 1317.56 |
| 65.43 | 1404.25 |
| 65.44 | 1577.61 |
| 65.45 | 1421.58 |
| 65.46 | 1508.26 |
| 65.47 | 1369.57 |
| 65.48 | 1542.94 |
| 65.49 | 1490.93 |
| 65.5  | 1612.28 |
| 65.51 | 1698.96 |
| 65.52 | 1768.31 |
| 65.53 | 1802.98 |
| 65.54 | 1698.96 |
| 65.55 | 1976.35 |
| 65.56 | 2063.03 |
| 65.57 | 2028.36 |
| 65.58 | 2253.73 |
| 65.59 | 2149.71 |
| 65.6  | 2323.07 |
| 65.61 | 2548.45 |
| 65.62 | 2375.08 |
| 65.63 | 2860.5  |
| 65.64 | 2947.18 |
| 65.65 | 2999.19 |

|       |         |
|-------|---------|
| 65.66 | 3311.25 |
| 65.67 | 3588.63 |
| 65.68 | 3918.02 |
| 65.69 | 4126.06 |
| 65.7  | 4334.09 |
| 65.71 | 4316.76 |
| 65.72 | 5010.21 |
| 65.73 | 5027.55 |
| 65.74 | 4975.54 |
| 65.75 | 5356.94 |
| 65.76 | 5963.71 |
| 65.77 | 6033.06 |
| 65.78 | 6171.75 |
| 65.79 | 6137.08 |
| 65.8  | 5981.05 |
| 65.81 | 5807.68 |
| 65.82 | 5530.3  |
| 65.83 | 5616.98 |
| 65.84 | 5287.59 |
| 65.85 | 5478.29 |
| 65.86 | 4420.77 |
| 65.87 | 4299.42 |
| 65.88 | 4264.75 |
| 65.89 | 4386.1  |
| 65.9  | 3883.35 |
| 65.91 | 3866.01 |
| 65.92 | 3605.97 |
| 65.93 | 4091.38 |
| 65.94 | 3831.34 |
| 65.95 | 4299.42 |
| 65.96 | 3952.69 |
| 65.97 | 3675.31 |
| 65.98 | 3987.37 |
| 65.99 | 3519.28 |
| 66    | 3345.92 |
| 66.01 | 3328.58 |
| 66.02 | 3103.21 |
| 66.03 | 3137.88 |
| 66.04 | 2999.19 |
| 66.05 | 2739.15 |
| 66.06 | 2132.37 |
| 66.07 | 2271.06 |
| 66.08 | 2323.07 |
| 66.09 | 2201.72 |

|       |         |
|-------|---------|
| 66.1  | 2011.02 |
| 66.11 | 1716.3  |
| 66.12 | 1716.3  |
| 66.13 | 1629.62 |
| 66.14 | 1612.28 |
| 66.15 | 1750.97 |
| 66.16 | 1681.63 |
| 66.17 | 1438.92 |
| 66.18 | 1421.58 |
| 66.19 | 1525.6  |
| 66.2  | 1664.29 |
| 66.21 | 1421.58 |
| 66.22 | 1369.57 |
| 66.23 | 1542.94 |
| 66.24 | 1282.89 |
| 66.25 | 1508.26 |
| 66.26 | 1092.19 |
| 66.27 | 1352.24 |
| 66.28 | 1282.89 |
| 66.29 | 1508.26 |
| 66.3  | 1490.93 |
| 66.31 | 1126.86 |
| 66.32 | 1265.56 |
| 66.33 | 1005.51 |
| 66.34 | 1144.2  |
| 66.35 | 1109.53 |
| 66.36 | 1352.24 |
| 66.37 | 1057.52 |
| 66.38 | 1265.56 |
| 66.39 | 1092.19 |
| 66.4  | 1248.22 |
| 66.41 | 1074.85 |
| 66.42 | 1126.86 |
| 66.43 | 1005.51 |
| 66.44 | 849.482 |
| 66.45 | 1005.51 |
| 66.46 | 1352.24 |
| 66.47 | 953.5   |
| 66.48 | 849.482 |
| 66.49 | 1057.52 |
| 66.5  | 970.837 |
| 66.51 | 1074.85 |
| 66.52 | 1161.54 |
| 66.53 | 1040.18 |

|       |         |
|-------|---------|
| 66.54 | 988.173 |
| 66.55 | 1074.85 |
| 66.56 | 918.828 |
| 66.57 | 901.491 |
| 66.58 | 1074.85 |
| 66.59 | 1022.85 |
| 66.6  | 866.819 |
| 66.61 | 953.5   |
| 66.62 | 849.482 |
| 66.63 | 953.5   |
| 66.64 | 849.482 |
| 66.65 | 814.809 |
| 66.66 | 1074.85 |
| 66.67 | 1022.85 |
| 66.68 | 797.473 |
| 66.69 | 1040.18 |
| 66.7  | 866.819 |
| 66.71 | 832.146 |
| 66.72 | 901.491 |
| 66.73 | 797.473 |
| 66.74 | 918.828 |
| 66.75 | 1057.52 |
| 66.76 | 988.173 |
| 66.77 | 918.828 |
| 66.78 | 1040.18 |
| 66.79 | 988.173 |
| 66.8  | 849.482 |
| 66.81 | 762.8   |
| 66.82 | 1022.85 |
| 66.83 | 762.8   |
| 66.84 | 814.809 |
| 66.85 | 884.155 |
| 66.86 | 797.473 |
| 66.87 | 832.146 |
| 66.88 | 1005.51 |
| 66.89 | 884.155 |
| 66.9  | 849.482 |
| 66.91 | 728.128 |
| 66.92 | 797.473 |
| 66.93 | 849.482 |
| 66.94 | 884.155 |
| 66.95 | 780.137 |
| 66.96 | 884.155 |
| 66.97 | 918.828 |

|       |         |
|-------|---------|
| 66.98 | 780.137 |
| 66.99 | 866.819 |
| 67    | 780.137 |
| 67.01 | 936.164 |
| 67.02 | 953.5   |
| 67.03 | 884.155 |
| 67.04 | 884.155 |
| 67.05 | 918.828 |
| 67.06 | 832.146 |
| 67.07 | 780.137 |
| 67.08 | 866.819 |
| 67.09 | 762.8   |
| 67.1  | 710.791 |
| 67.11 | 780.137 |
| 67.12 | 624.109 |
| 67.13 | 780.137 |
| 67.14 | 901.491 |
| 67.15 | 797.473 |
| 67.16 | 901.491 |
| 67.17 | 814.809 |
| 67.18 | 780.137 |
| 67.19 | 693.455 |
| 67.2  | 797.473 |
| 67.21 | 658.782 |
| 67.22 | 918.828 |
| 67.23 | 710.791 |
| 67.24 | 814.809 |
| 67.25 | 936.164 |
| 67.26 | 936.164 |
| 67.27 | 814.809 |
| 67.28 | 762.8   |
| 67.29 | 797.473 |
| 67.3  | 918.828 |
| 67.31 | 537.427 |
| 67.32 | 866.819 |
| 67.33 | 745.464 |
| 67.34 | 693.455 |
| 67.35 | 728.128 |
| 67.36 | 953.5   |
| 67.37 | 814.809 |
| 67.38 | 624.109 |
| 67.39 | 641.446 |
| 67.4  | 797.473 |
| 67.41 | 814.809 |

|       |         |
|-------|---------|
| 67.42 | 1040.18 |
| 67.43 | 814.809 |
| 67.44 | 884.155 |
| 67.45 | 780.137 |
| 67.46 | 970.837 |
| 67.47 | 624.109 |
| 67.48 | 866.819 |
| 67.49 | 849.482 |
| 67.5  | 780.137 |
| 67.51 | 728.128 |
| 67.52 | 780.137 |
| 67.53 | 936.164 |
| 67.54 | 780.137 |
| 67.55 | 814.809 |
| 67.56 | 780.137 |
| 67.57 | 884.155 |
| 67.58 | 762.8   |
| 67.59 | 780.137 |
| 67.6  | 658.782 |
| 67.61 | 866.819 |
| 67.62 | 676.118 |
| 67.63 | 797.473 |
| 67.64 | 693.455 |
| 67.65 | 710.791 |
| 67.66 | 849.482 |
| 67.67 | 624.109 |
| 67.68 | 762.8   |
| 67.69 | 901.491 |
| 67.7  | 814.809 |
| 67.71 | 988.173 |
| 67.72 | 814.809 |
| 67.73 | 988.173 |
| 67.74 | 901.491 |
| 67.75 | 762.8   |
| 67.76 | 641.446 |
| 67.77 | 762.8   |
| 67.78 | 901.491 |
| 67.79 | 970.837 |
| 67.8  | 762.8   |
| 67.81 | 1057.52 |
| 67.82 | 1092.19 |
| 67.83 | 901.491 |
| 67.84 | 814.809 |
| 67.85 | 710.791 |

|       |         |
|-------|---------|
| 67.86 | 797.473 |
| 67.87 | 814.809 |
| 67.88 | 624.109 |
| 67.89 | 814.809 |
| 67.9  | 676.118 |
| 67.91 | 953.5   |
| 67.92 | 676.118 |
| 67.93 | 814.809 |
| 67.94 | 970.837 |
| 67.95 | 884.155 |
| 67.96 | 901.491 |
| 67.97 | 970.837 |
| 67.98 | 745.464 |
| 67.99 | 884.155 |
| 68    | 936.164 |
| 68.01 | 901.491 |
| 68.02 | 728.128 |
| 68.03 | 710.791 |
| 68.04 | 658.782 |
| 68.05 | 728.128 |
| 68.06 | 780.137 |
| 68.07 | 710.791 |
| 68.08 | 918.828 |
| 68.09 | 745.464 |
| 68.1  | 988.173 |
| 68.11 | 832.146 |
| 68.12 | 866.819 |
| 68.13 | 780.137 |
| 68.14 | 953.5   |
| 68.15 | 832.146 |
| 68.16 | 780.137 |
| 68.17 | 918.828 |
| 68.18 | 745.464 |
| 68.19 | 849.482 |
| 68.2  | 676.118 |
| 68.21 | 676.118 |
| 68.22 | 762.8   |
| 68.23 | 762.8   |
| 68.24 | 762.8   |
| 68.25 | 849.482 |
| 68.26 | 970.837 |
| 68.27 | 762.8   |
| 68.28 | 693.455 |
| 68.29 | 728.128 |



68.3 693.455  
68.31 710.791  
68.32 884.155  
68.33 780.137  
68.34 814.809  
68.35 762.8  
68.36 988.173  
68.37 814.809  
68.38 832.146  
68.39 745.464  
68.4 762.8  
68.41 1022.85  
68.42 676.118  
68.43 606.773  
68.44 814.809  
68.45 780.137  
68.46 710.791  
68.47 970.837  
68.48 606.773  
68.49 728.128  
68.5 780.137  
68.51 780.137  
68.52 710.791  
68.53 710.791  
68.54 832.146  
68.55 970.837  
68.56 866.819  
68.57 814.809  
68.58 832.146  
68.59 624.109  
68.6 918.828  
68.61 1005.51  
68.62 745.464  
68.63 797.473  
68.64 606.773  
68.65 797.473  
68.66 866.819  
68.67 745.464  
68.68 814.809  
68.69 780.137  
68.7 762.8  
68.71 936.164  
68.72 797.473  
68.73 901.491

|       |         |
|-------|---------|
| 68.74 | 849.482 |
| 68.75 | 780.137 |
| 68.76 | 970.837 |
| 68.77 | 918.828 |
| 68.78 | 849.482 |
| 68.79 | 780.137 |
| 68.8  | 970.837 |
| 68.81 | 936.164 |
| 68.82 | 884.155 |
| 68.83 | 832.146 |
| 68.84 | 814.809 |
| 68.85 | 780.137 |
| 68.86 | 745.464 |
| 68.87 | 762.8   |
| 68.88 | 936.164 |
| 68.89 | 814.809 |
| 68.9  | 641.446 |
| 68.91 | 693.455 |
| 68.92 | 1005.51 |
| 68.93 | 780.137 |
| 68.94 | 901.491 |
| 68.95 | 710.791 |
| 68.96 | 797.473 |
| 68.97 | 918.828 |
| 68.98 | 918.828 |
| 68.99 | 797.473 |
| 69    | 849.482 |
| 69.01 | 797.473 |
| 69.02 | 866.819 |
| 69.03 | 710.791 |
| 69.04 | 710.791 |
| 69.05 | 797.473 |
| 69.06 | 762.8   |
| 69.07 | 918.828 |
| 69.08 | 780.137 |
| 69.09 | 970.837 |
| 69.1  | 936.164 |
| 69.11 | 832.146 |
| 69.12 | 970.837 |
| 69.13 | 953.5   |
| 69.14 | 1022.85 |
| 69.15 | 901.491 |
| 69.16 | 901.491 |
| 69.17 | 1005.51 |

|       |         |
|-------|---------|
| 69.18 | 1057.52 |
| 69.19 | 1074.85 |
| 69.2  | 1074.85 |
| 69.21 | 1074.85 |
| 69.22 | 1248.22 |
| 69.23 | 1300.23 |
| 69.24 | 1178.87 |
| 69.25 | 1334.9  |
| 69.26 | 1282.89 |
| 69.27 | 1386.91 |
| 69.28 | 1508.26 |
| 69.29 | 1542.94 |
| 69.3  | 1352.24 |
| 69.31 | 1612.28 |
| 69.32 | 1681.63 |
| 69.33 | 1698.96 |
| 69.34 | 1924.34 |
| 69.35 | 1993.68 |
| 69.36 | 2063.03 |
| 69.37 | 2028.36 |
| 69.38 | 2219.06 |
| 69.39 | 2097.7  |
| 69.4  | 2219.06 |
| 69.41 | 1976.35 |
| 69.42 | 1872.33 |
| 69.43 | 1907    |
| 69.44 | 1837.66 |
| 69.45 | 1698.96 |
| 69.46 | 1941.67 |
| 69.47 | 1802.98 |
| 69.48 | 1508.26 |
| 69.49 | 1560.27 |
| 69.5  | 1508.26 |
| 69.51 | 1577.61 |
| 69.52 | 1525.6  |
| 69.53 | 1716.3  |
| 69.54 | 1768.31 |
| 69.55 | 1577.61 |
| 69.56 | 1716.3  |
| 69.57 | 1508.26 |
| 69.58 | 1473.59 |
| 69.59 | 1612.28 |
| 69.6  | 1473.59 |
| 69.61 | 1404.25 |

|       |         |
|-------|---------|
| 69.62 | 1698.96 |
| 69.63 | 1525.6  |
| 69.64 | 1490.93 |
| 69.65 | 1490.93 |
| 69.66 | 1386.91 |
| 69.67 | 1213.55 |
| 69.68 | 1438.92 |
| 69.69 | 1369.57 |
| 69.7  | 1144.2  |
| 69.71 | 1144.2  |
| 69.72 | 970.837 |
| 69.73 | 918.828 |
| 69.74 | 1040.18 |
| 69.75 | 884.155 |
| 69.76 | 970.837 |
| 69.77 | 953.5   |
| 69.78 | 1057.52 |
| 69.79 | 832.146 |
| 69.8  | 710.791 |
| 69.81 | 1022.85 |
| 69.82 | 814.809 |
| 69.83 | 970.837 |
| 69.84 | 832.146 |
| 69.85 | 728.128 |
| 69.86 | 814.809 |
| 69.87 | 745.464 |
| 69.88 | 710.791 |
| 69.89 | 762.8   |
| 69.9  | 936.164 |
| 69.91 | 1005.51 |
| 69.92 | 953.5   |
| 69.93 | 901.491 |
| 69.94 | 832.146 |
| 69.95 | 953.5   |
| 69.96 | 1005.51 |
| 69.97 | 866.819 |
| 69.98 | 832.146 |
| 69.99 | 1230.88 |
| 70    | 745.464 |
| 70.01 | 1040.18 |
| 70.02 | 901.491 |
| 70.03 | 1161.54 |
| 70.04 | 866.819 |
| 70.05 | 797.473 |

|       |         |
|-------|---------|
| 70.06 | 988.173 |
| 70.07 | 970.837 |
| 70.08 | 832.146 |
| 70.09 | 1057.52 |
| 70.1  | 1109.53 |
| 70.11 | 1213.55 |
| 70.12 | 1022.85 |
| 70.13 | 1109.53 |
| 70.14 | 1126.86 |
| 70.15 | 1248.22 |
| 70.16 | 1438.92 |
| 70.17 | 1022.85 |
| 70.18 | 1282.89 |
| 70.19 | 1196.21 |
| 70.2  | 1161.54 |
| 70.21 | 1109.53 |
| 70.22 | 1248.22 |
| 70.23 | 1265.56 |
| 70.24 | 1421.58 |
| 70.25 | 1594.95 |
| 70.26 | 1681.63 |
| 70.27 | 1508.26 |
| 70.28 | 1646.96 |
| 70.29 | 2028.36 |
| 70.3  | 2288.4  |
| 70.31 | 1854.99 |
| 70.32 | 2045.69 |
| 70.33 | 2063.03 |
| 70.34 | 2288.4  |
| 70.35 | 2635.13 |
| 70.36 | 2635.13 |
| 70.37 | 2461.76 |
| 70.38 | 2808.49 |
| 70.39 | 2981.86 |
| 70.4  | 3051.2  |
| 70.41 | 2912.51 |
| 70.42 | 3103.21 |
| 70.43 | 3172.56 |
| 70.44 | 3415.26 |
| 70.45 | 3155.22 |
| 70.46 | 2825.83 |
| 70.47 | 2999.19 |
| 70.48 | 2999.19 |
| 70.49 | 2687.14 |

|       |         |
|-------|---------|
| 70.5  | 2565.78 |
| 70.51 | 2444.43 |
| 70.52 | 2201.72 |
| 70.53 | 2236.39 |
| 70.54 | 2253.73 |
| 70.55 | 2201.72 |
| 70.56 | 2340.41 |
| 70.57 | 2721.81 |
| 70.58 | 2305.74 |
| 70.59 | 2045.69 |
| 70.6  | 2080.36 |
| 70.61 | 2097.7  |
| 70.62 | 2531.11 |
| 70.63 | 1872.33 |
| 70.64 | 2080.36 |
| 70.65 | 2063.03 |
| 70.66 | 1837.66 |
| 70.67 | 2045.69 |
| 70.68 | 1820.32 |
| 70.69 | 1750.97 |
| 70.7  | 1698.96 |
| 70.71 | 1577.61 |
| 70.72 | 1456.26 |
| 70.73 | 1612.28 |
| 70.74 | 1282.89 |
| 70.75 | 1560.27 |
| 70.76 | 1334.9  |
| 70.77 | 1126.86 |
| 70.78 | 1161.54 |
| 70.79 | 1248.22 |
| 70.8  | 1230.88 |
| 70.81 | 1074.85 |
| 70.82 | 1040.18 |
| 70.83 | 1040.18 |
| 70.84 | 988.173 |
| 70.85 | 1057.52 |
| 70.86 | 1057.52 |
| 70.87 | 988.173 |
| 70.88 | 866.819 |
| 70.89 | 1040.18 |
| 70.9  | 1092.19 |
| 70.91 | 1040.18 |
| 70.92 | 1057.52 |
| 70.93 | 1040.18 |

|       |         |
|-------|---------|
| 70.94 | 1040.18 |
| 70.95 | 814.809 |
| 70.96 | 866.819 |
| 70.97 | 745.464 |
| 70.98 | 780.137 |
| 70.99 | 901.491 |
| 71    | 970.837 |
| 71.01 | 780.137 |
| 71.02 | 1022.85 |
| 71.03 | 1057.52 |
| 71.04 | 832.146 |
| 71.05 | 884.155 |
| 71.06 | 693.455 |
| 71.07 | 745.464 |
| 71.08 | 1040.18 |
| 71.09 | 1144.2  |
| 71.1  | 866.819 |
| 71.11 | 918.828 |
| 71.12 | 936.164 |
| 71.13 | 988.173 |
| 71.14 | 988.173 |
| 71.15 | 849.482 |
| 71.16 | 693.455 |
| 71.17 | 901.491 |
| 71.18 | 970.837 |
| 71.19 | 936.164 |
| 71.2  | 901.491 |
| 71.21 | 762.8   |
| 71.22 | 797.473 |
| 71.23 | 866.819 |
| 71.24 | 762.8   |
| 71.25 | 797.473 |
| 71.26 | 814.809 |
| 71.27 | 953.5   |
| 71.28 | 814.809 |
| 71.29 | 797.473 |
| 71.3  | 676.118 |
| 71.31 | 624.109 |
| 71.32 | 572.1   |
| 71.33 | 624.109 |
| 71.34 | 780.137 |
| 71.35 | 762.8   |
| 71.36 | 797.473 |
| 71.37 | 728.128 |

|       |         |
|-------|---------|
| 71.38 | 710.791 |
| 71.39 | 710.791 |
| 71.4  | 832.146 |
| 71.41 | 780.137 |
| 71.42 | 936.164 |
| 71.43 | 832.146 |
| 71.44 | 780.137 |
| 71.45 | 641.446 |
| 71.46 | 710.791 |
| 71.47 | 780.137 |
| 71.48 | 832.146 |
| 71.49 | 936.164 |
| 71.5  | 780.137 |
| 71.51 | 658.782 |
| 71.52 | 641.446 |
| 71.53 | 832.146 |
| 71.54 | 710.791 |
| 71.55 | 814.809 |
| 71.56 | 814.809 |
| 71.57 | 676.118 |
| 71.58 | 710.791 |
| 71.59 | 849.482 |
| 71.6  | 520.091 |
| 71.61 | 624.109 |
| 71.62 | 745.464 |
| 71.63 | 745.464 |
| 71.64 | 884.155 |
| 71.65 | 797.473 |
| 71.66 | 589.437 |
| 71.67 | 658.782 |
| 71.68 | 832.146 |
| 71.69 | 762.8   |
| 71.7  | 606.773 |
| 71.71 | 953.5   |
| 71.72 | 866.819 |
| 71.73 | 849.482 |
| 71.74 | 520.091 |
| 71.75 | 728.128 |
| 71.76 | 849.482 |
| 71.77 | 676.118 |
| 71.78 | 1022.85 |
| 71.79 | 866.819 |
| 71.8  | 762.8   |
| 71.81 | 832.146 |



|       |         |
|-------|---------|
| 71.82 | 693.455 |
| 71.83 | 762.8   |
| 71.84 | 745.464 |
| 71.85 | 710.791 |
| 71.86 | 780.137 |
| 71.87 | 797.473 |
| 71.88 | 745.464 |
| 71.89 | 641.446 |
| 71.9  | 606.773 |
| 71.91 | 762.8   |
| 71.92 | 728.128 |
| 71.93 | 780.137 |
| 71.94 | 936.164 |
| 71.95 | 866.819 |
| 71.96 | 624.109 |
| 71.97 | 918.828 |
| 71.98 | 814.809 |
| 71.99 | 745.464 |
| 72    | 624.109 |
| 72.01 | 797.473 |
| 72.02 | 710.791 |
| 72.03 | 970.837 |
| 72.04 | 693.455 |
| 72.05 | 832.146 |
| 72.06 | 832.146 |
| 72.07 | 676.118 |
| 72.08 | 814.809 |
| 72.09 | 676.118 |
| 72.1  | 884.155 |
| 72.11 | 780.137 |
| 72.12 | 572.1   |
| 72.13 | 676.118 |
| 72.14 | 641.446 |
| 72.15 | 745.464 |
| 72.16 | 693.455 |
| 72.17 | 797.473 |
| 72.18 | 1057.52 |
| 72.19 | 797.473 |
| 72.2  | 832.146 |
| 72.21 | 745.464 |
| 72.22 | 762.8   |
| 72.23 | 797.473 |
| 72.24 | 814.809 |
| 72.25 | 884.155 |

72.26 624.109  
72.27 953.5  
72.28 589.437  
72.29 624.109  
72.3 849.482  
72.31 745.464  
72.32 953.5  
72.33 780.137  
72.34 780.137  
72.35 1057.52  
72.36 762.8  
72.37 745.464  
72.38 745.464  
72.39 1022.85  
72.4 797.473  
72.41 745.464  
72.42 693.455  
72.43 780.137  
72.44 728.128  
72.45 884.155  
72.46 970.837  
72.47 658.782  
72.48 866.819  
72.49 866.819  
72.5 641.446  
72.51 641.446  
72.52 866.819  
72.53 658.782  
72.54 814.809  
72.55 849.482  
72.56 884.155  
72.57 728.128  
72.58 745.464  
72.59 866.819  
72.6 693.455  
72.61 849.482  
72.62 866.819  
72.63 762.8  
72.64 866.819  
72.65 970.837  
72.66 849.482  
72.67 936.164  
72.68 884.155  
72.69 814.809

|       |         |
|-------|---------|
| 72.7  | 728.128 |
| 72.71 | 936.164 |
| 72.72 | 970.837 |
| 72.73 | 936.164 |
| 72.74 | 884.155 |
| 72.75 | 832.146 |
| 72.76 | 1074.85 |
| 72.77 | 970.837 |
| 72.78 | 1144.2  |
| 72.79 | 1022.85 |
| 72.8  | 1109.53 |
| 72.81 | 1352.24 |
| 72.82 | 1230.88 |
| 72.83 | 901.491 |
| 72.84 | 1144.2  |
| 72.85 | 1248.22 |
| 72.86 | 1196.21 |
| 72.87 | 1265.56 |
| 72.88 | 1473.59 |
| 72.89 | 1525.6  |
| 72.9  | 1629.62 |
| 72.91 | 1924.34 |
| 72.92 | 2063.03 |
| 72.93 | 2340.41 |
| 72.94 | 2028.36 |
| 72.95 | 2149.71 |
| 72.96 | 2115.04 |
| 72.97 | 2531.11 |
| 72.98 | 2565.78 |
| 72.99 | 2999.19 |
| 73    | 2843.16 |
| 73.01 | 2929.85 |
| 73.02 | 3449.94 |
| 73.03 | 3311.25 |
| 73.04 | 3137.88 |
| 73.05 | 2981.86 |
| 73.06 | 3814    |
| 73.07 | 4056.71 |
| 73.08 | 3935.36 |
| 73.09 | 3970.03 |
| 73.1  | 4039.37 |
| 73.11 | 3363.26 |
| 73.12 | 3675.31 |
| 73.13 | 3571.29 |

|       |         |
|-------|---------|
| 73.14 | 3397.93 |
| 73.15 | 3588.63 |
| 73.16 | 3016.53 |
| 73.17 | 3137.88 |
| 73.18 | 3120.55 |
| 73.19 | 3155.22 |
| 73.2  | 2860.5  |
| 73.21 | 2877.84 |
| 73.22 | 2791.16 |
| 73.23 | 2323.07 |
| 73.24 | 3016.53 |
| 73.25 | 2548.45 |
| 73.26 | 2895.17 |
| 73.27 | 2704.47 |
| 73.28 | 2860.5  |
| 73.29 | 2461.76 |
| 73.3  | 2756.48 |
| 73.31 | 2531.11 |
| 73.32 | 2531.11 |
| 73.33 | 2444.43 |
| 73.34 | 2444.43 |
| 73.35 | 2184.38 |
| 73.36 | 2011.02 |
| 73.37 | 2323.07 |
| 73.38 | 2219.06 |
| 73.39 | 1577.61 |
| 73.4  | 1750.97 |
| 73.41 | 1629.62 |
| 73.42 | 1612.28 |
| 73.43 | 1733.64 |
| 73.44 | 1369.57 |
| 73.45 | 1369.57 |
| 73.46 | 1282.89 |
| 73.47 | 1230.88 |
| 73.48 | 1161.54 |
| 73.49 | 676.118 |
| 73.5  | 1057.52 |
| 73.51 | 988.173 |
| 73.52 | 1144.2  |
| 73.53 | 1057.52 |
| 73.54 | 1109.53 |
| 73.55 | 1178.87 |
| 73.56 | 1300.23 |
| 73.57 | 1074.85 |

|       |         |
|-------|---------|
| 73.58 | 1230.88 |
| 73.59 | 1074.85 |
| 73.6  | 970.837 |
| 73.61 | 988.173 |
| 73.62 | 988.173 |
| 73.63 | 884.155 |
| 73.64 | 936.164 |
| 73.65 | 832.146 |
| 73.66 | 849.482 |
| 73.67 | 1161.54 |
| 73.68 | 970.837 |
| 73.69 | 1109.53 |
| 73.7  | 1074.85 |
| 73.71 | 1265.56 |
| 73.72 | 1092.19 |
| 73.73 | 1022.85 |
| 73.74 | 1352.24 |
| 73.75 | 1265.56 |
| 73.76 | 1092.19 |
| 73.77 | 1126.86 |
| 73.78 | 1230.88 |
| 73.79 | 1248.22 |
| 73.8  | 1421.58 |
| 73.81 | 1404.25 |
| 73.82 | 1542.94 |
| 73.83 | 1352.24 |
| 73.84 | 1837.66 |
| 73.85 | 1473.59 |
| 73.86 | 1300.23 |
| 73.87 | 1404.25 |
| 73.88 | 1265.56 |
| 73.89 | 1386.91 |
| 73.9  | 1456.26 |
| 73.91 | 1352.24 |
| 73.92 | 1421.58 |
| 73.93 | 1300.23 |
| 73.94 | 1438.92 |
| 73.95 | 988.173 |
| 73.96 | 1057.52 |
| 73.97 | 1092.19 |
| 73.98 | 1352.24 |
| 73.99 | 1074.85 |
| 74    | 1178.87 |
| 74.01 | 936.164 |

|       |         |
|-------|---------|
| 74.02 | 1317.56 |
| 74.03 | 1300.23 |
| 74.04 | 1005.51 |
| 74.05 | 1040.18 |
| 74.06 | 1386.91 |
| 74.07 | 1282.89 |
| 74.08 | 1213.55 |
| 74.09 | 1178.87 |
| 74.1  | 1438.92 |
| 74.11 | 1334.9  |
| 74.12 | 1265.56 |
| 74.13 | 1265.56 |
| 74.14 | 1196.21 |
| 74.15 | 1005.51 |
| 74.16 | 884.155 |
| 74.17 | 1005.51 |
| 74.18 | 1005.51 |
| 74.19 | 918.828 |
| 74.2  | 866.819 |
| 74.21 | 762.8   |
| 74.22 | 988.173 |
| 74.23 | 797.473 |
| 74.24 | 814.809 |
| 74.25 | 884.155 |
| 74.26 | 849.482 |
| 74.27 | 918.828 |
| 74.28 | 849.482 |
| 74.29 | 780.137 |
| 74.3  | 762.8   |
| 74.31 | 988.173 |
| 74.32 | 797.473 |
| 74.33 | 918.828 |
| 74.34 | 970.837 |
| 74.35 | 832.146 |
| 74.36 | 728.128 |
| 74.37 | 745.464 |
| 74.38 | 953.5   |
| 74.39 | 849.482 |
| 74.4  | 814.809 |
| 74.41 | 832.146 |
| 74.42 | 936.164 |
| 74.43 | 728.128 |
| 74.44 | 901.491 |
| 74.45 | 1022.85 |

74.46 884.155  
74.47 797.473  
74.48 988.173  
74.49 936.164  
74.5 884.155  
74.51 797.473  
74.52 728.128  
74.53 814.809  
74.54 606.773  
74.55 832.146  
74.56 970.837  
74.57 884.155  
74.58 780.137  
74.59 849.482  
74.6 832.146  
74.61 624.109  
74.62 780.137  
74.63 710.791  
74.64 624.109  
74.65 624.109  
74.66 780.137  
74.67 849.482  
74.68 745.464  
74.69 901.491  
74.7 797.473  
74.71 814.809  
74.72 606.773  
74.73 849.482  
74.74 849.482  
74.75 797.473  
74.76 745.464  
74.77 745.464  
74.78 1040.18  
74.79 866.819  
74.8 693.455  
74.81 676.118  
74.82 884.155  
74.83 901.491  
74.84 832.146  
74.85 693.455  
74.86 762.8  
74.87 728.128  
74.88 849.482  
74.89 780.137

|       |         |
|-------|---------|
| 74.9  | 693.455 |
| 74.91 | 901.491 |
| 74.92 | 884.155 |
| 74.93 | 762.8   |
| 74.94 | 918.828 |
| 74.95 | 797.473 |
| 74.96 | 641.446 |
| 74.97 | 710.791 |
| 74.98 | 676.118 |
| 74.99 | 797.473 |
| 75    | 658.782 |
| 75.01 | 988.173 |
| 75.02 | 710.791 |
| 75.03 | 693.455 |
| 75.04 | 797.473 |
| 75.05 | 710.791 |
| 75.06 | 884.155 |
| 75.07 | 728.128 |
| 75.08 | 485.418 |
| 75.09 | 606.773 |
| 75.1  | 745.464 |
| 75.11 | 606.773 |
| 75.12 | 693.455 |
| 75.13 | 710.791 |
| 75.14 | 710.791 |
| 75.15 | 658.782 |
| 75.16 | 537.427 |
| 75.17 | 710.791 |
| 75.18 | 641.446 |
| 75.19 | 832.146 |
| 75.2  | 832.146 |
| 75.21 | 710.791 |
| 75.22 | 693.455 |
| 75.23 | 728.128 |
| 75.24 | 658.782 |
| 75.25 | 866.819 |
| 75.26 | 936.164 |
| 75.27 | 884.155 |
| 75.28 | 780.137 |
| 75.29 | 1005.51 |
| 75.3  | 918.828 |
| 75.31 | 918.828 |
| 75.32 | 728.128 |
| 75.33 | 762.8   |



|       |         |
|-------|---------|
| 75.34 | 1022.85 |
| 75.35 | 745.464 |
| 75.36 | 728.128 |
| 75.37 | 745.464 |
| 75.38 | 589.437 |
| 75.39 | 762.8   |
| 75.4  | 641.446 |
| 75.41 | 797.473 |
| 75.42 | 953.5   |
| 75.43 | 728.128 |
| 75.44 | 658.782 |
| 75.45 | 693.455 |
| 75.46 | 710.791 |
| 75.47 | 1005.51 |
| 75.48 | 693.455 |
| 75.49 | 728.128 |
| 75.5  | 814.809 |
| 75.51 | 1092.19 |
| 75.52 | 832.146 |
| 75.53 | 901.491 |
| 75.54 | 797.473 |
| 75.55 | 814.809 |
| 75.56 | 572.1   |
| 75.57 | 762.8   |
| 75.58 | 728.128 |
| 75.59 | 901.491 |
| 75.6  | 745.464 |
| 75.61 | 866.819 |
| 75.62 | 832.146 |
| 75.63 | 728.128 |
| 75.64 | 780.137 |
| 75.65 | 780.137 |
| 75.66 | 797.473 |
| 75.67 | 936.164 |
| 75.68 | 797.473 |
| 75.69 | 745.464 |
| 75.7  | 710.791 |
| 75.71 | 814.809 |
| 75.72 | 832.146 |
| 75.73 | 901.491 |
| 75.74 | 780.137 |
| 75.75 | 970.837 |
| 75.76 | 780.137 |
| 75.77 | 780.137 |

75.78 814.809  
75.79 780.137  
75.8 641.446  
75.81 710.791  
75.82 849.482  
75.83 624.109  
75.84 936.164  
75.85 918.828  
75.86 728.128  
75.87 710.791  
75.88 693.455  
75.89 676.118  
75.9 676.118  
75.91 606.773  
75.92 762.8  
75.93 814.809  
75.94 745.464  
75.95 624.109  
75.96 762.8  
75.97 780.137  
75.98 832.146  
75.99 658.782  
76 589.437  
76.01 710.791  
76.02 814.809  
76.03 641.446  
76.04 710.791  
76.05 936.164  
76.06 1022.85  
76.07 884.155  
76.08 814.809  
76.09 884.155  
76.1 693.455  
76.11 780.137  
76.12 762.8  
76.13 710.791  
76.14 728.128  
76.15 745.464  
76.16 918.828  
76.17 814.809  
76.18 849.482  
76.19 1005.51  
76.2 1005.51  
76.21 762.8

|       |         |
|-------|---------|
| 76.22 | 849.482 |
| 76.23 | 901.491 |
| 76.24 | 832.146 |
| 76.25 | 918.828 |
| 76.26 | 832.146 |
| 76.27 | 936.164 |
| 76.28 | 1126.86 |
| 76.29 | 970.837 |
| 76.3  | 676.118 |
| 76.31 | 693.455 |
| 76.32 | 884.155 |
| 76.33 | 1144.2  |
| 76.34 | 1178.87 |
| 76.35 | 1473.59 |
| 76.36 | 1473.59 |
| 76.37 | 1386.91 |
| 76.38 | 1421.58 |
| 76.39 | 1681.63 |
| 76.4  | 1525.6  |
| 76.41 | 1473.59 |
| 76.42 | 1646.96 |
| 76.43 | 1785.65 |
| 76.44 | 1802.98 |
| 76.45 | 1907    |
| 76.46 | 1733.64 |
| 76.47 | 1854.99 |
| 76.48 | 1820.32 |
| 76.49 | 2045.69 |
| 76.5  | 1907    |
| 76.51 | 1785.65 |
| 76.52 | 1802.98 |
| 76.53 | 1976.35 |
| 76.54 | 1508.26 |
| 76.55 | 1629.62 |
| 76.56 | 1508.26 |
| 76.57 | 1456.26 |
| 76.58 | 1629.62 |
| 76.59 | 1542.94 |
| 76.6  | 1646.96 |
| 76.61 | 1490.93 |
| 76.62 | 1473.59 |
| 76.63 | 1629.62 |
| 76.64 | 1473.59 |
| 76.65 | 1386.91 |

|       |         |
|-------|---------|
| 76.66 | 1612.28 |
| 76.67 | 1421.58 |
| 76.68 | 1508.26 |
| 76.69 | 1508.26 |
| 76.7  | 1681.63 |
| 76.71 | 1386.91 |
| 76.72 | 1594.95 |
| 76.73 | 1456.26 |
| 76.74 | 1334.9  |
| 76.75 | 1213.55 |
| 76.76 | 1282.89 |
| 76.77 | 1178.87 |
| 76.78 | 1421.58 |
| 76.79 | 1230.88 |
| 76.8  | 1092.19 |
| 76.81 | 1040.18 |
| 76.82 | 1161.54 |
| 76.83 | 1005.51 |
| 76.84 | 918.828 |
| 76.85 | 1092.19 |
| 76.86 | 884.155 |
| 76.87 | 1178.87 |
| 76.88 | 1092.19 |
| 76.89 | 1178.87 |
| 76.9  | 1040.18 |
| 76.91 | 953.5   |
| 76.92 | 1213.55 |
| 76.93 | 1109.53 |
| 76.94 | 1178.87 |
| 76.95 | 1057.52 |
| 76.96 | 1005.51 |
| 76.97 | 1040.18 |
| 76.98 | 745.464 |
| 76.99 | 918.828 |
| 77    | 1074.85 |
| 77.01 | 797.473 |
| 77.02 | 918.828 |
| 77.03 | 1196.21 |
| 77.04 | 1126.86 |
| 77.05 | 1057.52 |
| 77.06 | 1161.54 |
| 77.07 | 1213.55 |
| 77.08 | 1352.24 |
| 77.09 | 1386.91 |

|       |         |
|-------|---------|
| 77.1  | 1421.58 |
| 77.11 | 1438.92 |
| 77.12 | 1560.27 |
| 77.13 | 1473.59 |
| 77.14 | 1473.59 |
| 77.15 | 1525.6  |
| 77.16 | 1560.27 |
| 77.17 | 1837.66 |
| 77.18 | 1629.62 |
| 77.19 | 1785.65 |
| 77.2  | 2184.38 |
| 77.21 | 2479.1  |
| 77.22 | 2583.12 |
| 77.23 | 2964.52 |
| 77.24 | 2305.74 |
| 77.25 | 2548.45 |
| 77.26 | 2808.49 |
| 77.27 | 2895.17 |
| 77.28 | 2791.16 |
| 77.29 | 3189.89 |
| 77.3  | 3137.88 |
| 77.31 | 3033.86 |
| 77.32 | 3259.24 |
| 77.33 | 3241.9  |
| 77.34 | 3085.87 |
| 77.35 | 3120.55 |
| 77.36 | 2843.16 |
| 77.37 | 3155.22 |
| 77.38 | 2999.19 |
| 77.39 | 2531.11 |
| 77.4  | 2687.14 |
| 77.41 | 2513.77 |
| 77.42 | 2149.71 |
| 77.43 | 1889.66 |
| 77.44 | 2513.77 |
| 77.45 | 2236.39 |
| 77.46 | 2011.02 |
| 77.47 | 2323.07 |
| 77.48 | 2132.37 |
| 77.49 | 2080.36 |
| 77.5  | 2444.43 |
| 77.51 | 2288.4  |
| 77.52 | 2357.75 |
| 77.53 | 2444.43 |

|       |         |
|-------|---------|
| 77.54 | 2548.45 |
| 77.55 | 2427.09 |
| 77.56 | 2149.71 |
| 77.57 | 2149.71 |
| 77.58 | 2080.36 |
| 77.59 | 1889.66 |
| 77.6  | 2167.05 |
| 77.61 | 1716.3  |
| 77.62 | 1733.64 |
| 77.63 | 1681.63 |
| 77.64 | 1508.26 |
| 77.65 | 1265.56 |
| 77.66 | 1352.24 |
| 77.67 | 1230.88 |
| 77.68 | 1438.92 |
| 77.69 | 1196.21 |
| 77.7  | 1265.56 |
| 77.71 | 1248.22 |
| 77.72 | 1178.87 |
| 77.73 | 1230.88 |
| 77.74 | 1057.52 |
| 77.75 | 1196.21 |
| 77.76 | 1213.55 |
| 77.77 | 988.173 |
| 77.78 | 936.164 |
| 77.79 | 866.819 |
| 77.8  | 884.155 |
| 77.81 | 936.164 |
| 77.82 | 936.164 |
| 77.83 | 884.155 |
| 77.84 | 849.482 |
| 77.85 | 1040.18 |
| 77.86 | 1144.2  |
| 77.87 | 884.155 |
| 77.88 | 936.164 |
| 77.89 | 901.491 |
| 77.9  | 1005.51 |
| 77.91 | 1109.53 |
| 77.92 | 1040.18 |
| 77.93 | 901.491 |
| 77.94 | 953.5   |
| 77.95 | 849.482 |
| 77.96 | 780.137 |
| 77.97 | 936.164 |

|       |         |
|-------|---------|
| 77.98 | 728.128 |
| 77.99 | 676.118 |
| 78    | 1005.51 |
| 78.01 | 745.464 |
| 78.02 | 953.5   |
| 78.03 | 797.473 |
| 78.04 | 780.137 |
| 78.05 | 780.137 |
| 78.06 | 970.837 |
| 78.07 | 849.482 |
| 78.08 | 1109.53 |
| 78.09 | 1022.85 |
| 78.1  | 797.473 |
| 78.11 | 676.118 |
| 78.12 | 797.473 |
| 78.13 | 710.791 |
| 78.14 | 762.8   |
| 78.15 | 693.455 |
| 78.16 | 849.482 |
| 78.17 | 693.455 |
| 78.18 | 728.128 |
| 78.19 | 832.146 |
| 78.2  | 901.491 |
| 78.21 | 1005.51 |
| 78.22 | 780.137 |
| 78.23 | 745.464 |
| 78.24 | 797.473 |
| 78.25 | 710.791 |
| 78.26 | 884.155 |
| 78.27 | 676.118 |
| 78.28 | 814.809 |
| 78.29 | 728.128 |
| 78.3  | 728.128 |
| 78.31 | 676.118 |
| 78.32 | 710.791 |
| 78.33 | 918.828 |
| 78.34 | 658.782 |
| 78.35 | 866.819 |
| 78.36 | 780.137 |
| 78.37 | 676.118 |
| 78.38 | 745.464 |
| 78.39 | 814.809 |
| 78.4  | 866.819 |
| 78.41 | 849.482 |

78.42 832.146  
78.43 780.137  
78.44 606.773  
78.45 606.773  
78.46 832.146  
78.47 849.482  
78.48 988.173  
78.49 624.109  
78.5 832.146  
78.51 832.146  
78.52 728.128  
78.53 814.809  
78.54 918.828  
78.55 936.164  
78.56 676.118  
78.57 814.809  
78.58 901.491  
78.59 745.464  
78.6 762.8  
78.61 710.791  
78.62 797.473  
78.63 832.146  
78.64 658.782  
78.65 884.155  
78.66 710.791  
78.67 797.473  
78.68 797.473  
78.69 693.455  
78.7 693.455  
78.71 745.464  
78.72 676.118  
78.73 832.146  
78.74 710.791  
78.75 797.473  
78.76 693.455  
78.77 658.782  
78.78 849.482  
78.79 676.118  
78.8 728.128  
78.81 745.464  
78.82 988.173  
78.83 780.137  
78.84 606.773  
78.85 780.137



|       |         |
|-------|---------|
| 78.86 | 797.473 |
| 78.87 | 797.473 |
| 78.88 | 970.837 |
| 78.89 | 970.837 |
| 78.9  | 780.137 |
| 78.91 | 624.109 |
| 78.92 | 849.482 |
| 78.93 | 797.473 |
| 78.94 | 797.473 |
| 78.95 | 849.482 |
| 78.96 | 780.137 |
| 78.97 | 866.819 |
| 78.98 | 814.809 |
| 78.99 | 554.764 |
| 79    | 797.473 |
| 79.01 | 589.437 |
| 79.02 | 849.482 |
| 79.03 | 728.128 |
| 79.04 | 693.455 |
| 79.05 | 710.791 |
| 79.06 | 918.828 |
| 79.07 | 745.464 |
| 79.08 | 762.8   |
| 79.09 | 520.091 |
| 79.1  | 849.482 |
| 79.11 | 745.464 |
| 79.12 | 658.782 |
| 79.13 | 589.437 |
| 79.14 | 745.464 |
| 79.15 | 953.5   |
| 79.16 | 832.146 |
| 79.17 | 745.464 |
| 79.18 | 814.809 |
| 79.19 | 676.118 |
| 79.2  | 676.118 |
| 79.21 | 797.473 |
| 79.22 | 866.819 |
| 79.23 | 693.455 |
| 79.24 | 658.782 |
| 79.25 | 762.8   |
| 79.26 | 849.482 |
| 79.27 | 693.455 |
| 79.28 | 797.473 |
| 79.29 | 502.755 |

79.3 658.782  
79.31 676.118  
79.32 762.8  
79.33 693.455  
79.34 658.782  
79.35 641.446  
79.36 780.137  
79.37 676.118  
79.38 641.446  
79.39 797.473  
79.4 866.819  
79.41 329.391  
79.42 728.128  
79.43 884.155  
79.44 589.437  
79.45 606.773  
79.46 832.146  
79.47 797.473  
79.48 710.791  
79.49 832.146  
79.5 797.473  
79.51 762.8  
79.52 728.128  
79.53 572.1  
79.54 814.809  
79.55 641.446  
79.56 710.791  
79.57 676.118  
79.58 624.109  
79.59 554.764  
79.6 780.137  
79.61 780.137  
79.62 797.473  
79.63 693.455  
79.64 762.8  
79.65 780.137  
79.66 728.128  
79.67 832.146  
79.68 641.446  
79.69 762.8  
79.7 676.118  
79.71 520.091  
79.72 658.782  
79.73 728.128

|       |         |
|-------|---------|
| 79.74 | 866.819 |
| 79.75 | 728.128 |
| 79.76 | 624.109 |
| 79.77 | 624.109 |
| 79.78 | 606.773 |
| 79.79 | 693.455 |
| 79.8  | 797.473 |
| 79.81 | 780.137 |
| 79.82 | 918.828 |
| 79.83 | 572.1   |
| 79.84 | 710.791 |
| 79.85 | 728.128 |
| 79.86 | 832.146 |
| 79.87 | 676.118 |
| 79.88 | 797.473 |
| 79.89 | 728.128 |
| 79.9  | 728.128 |
| 79.91 | 710.791 |
| 79.92 | 658.782 |
| 79.93 | 658.782 |
| 79.94 | 832.146 |
| 79.95 | 797.473 |
| 79.96 | 762.8   |
| 79.97 | 554.764 |
| 79.98 | 901.491 |
| 79.99 | 970.837 |
| 80    | 658.782 |
| 80.01 | 676.118 |
| 80.02 | 658.782 |
| 80.03 | 762.8   |
| 80.04 | 745.464 |
| 80.05 | 745.464 |
| 80.06 | 918.828 |
| 80.07 | 936.164 |
| 80.08 | 572.1   |
| 80.09 | 676.118 |
| 80.1  | 641.446 |
| 80.11 | 780.137 |
| 80.12 | 762.8   |
| 80.13 | 710.791 |
| 80.14 | 762.8   |
| 80.15 | 814.809 |
| 80.16 | 1022.85 |
| 80.17 | 658.782 |

|       |         |
|-------|---------|
| 80.18 | 641.446 |
| 80.19 | 710.791 |
| 80.2  | 1109.53 |
| 80.21 | 797.473 |
| 80.22 | 641.446 |
| 80.23 | 728.128 |
| 80.24 | 814.809 |
| 80.25 | 589.437 |
| 80.26 | 658.782 |
| 80.27 | 520.091 |
| 80.28 | 572.1   |
| 80.29 | 745.464 |
| 80.3  | 710.791 |
| 80.31 | 589.437 |
| 80.32 | 832.146 |
| 80.33 | 658.782 |
| 80.34 | 780.137 |
| 80.35 | 762.8   |
| 80.36 | 780.137 |
| 80.37 | 832.146 |
| 80.38 | 676.118 |
| 80.39 | 797.473 |
| 80.4  | 884.155 |
| 80.41 | 658.782 |
| 80.42 | 676.118 |
| 80.43 | 676.118 |
| 80.44 | 797.473 |
| 80.45 | 693.455 |
| 80.46 | 554.764 |
| 80.47 | 814.809 |
| 80.48 | 710.791 |
| 80.49 | 572.1   |
| 80.5  | 606.773 |
| 80.51 | 797.473 |
| 80.52 | 728.128 |
| 80.53 | 780.137 |
| 80.54 | 606.773 |
| 80.55 | 797.473 |
| 80.56 | 641.446 |
| 80.57 | 901.491 |
| 80.58 | 762.8   |
| 80.59 | 624.109 |
| 80.6  | 433.409 |
| 80.61 | 641.446 |

80.62 780.137  
80.63 901.491  
80.64 710.791  
80.65 866.819  
80.66 728.128  
80.67 624.109  
80.68 710.791  
80.69 884.155  
80.7 780.137  
80.71 693.455  
80.72 780.137  
80.73 832.146  
80.74 814.809  
80.75 520.091  
80.76 537.427  
80.77 710.791  
80.78 710.791  
80.79 728.128  
80.8 901.491  
80.81 780.137  
80.82 693.455  
80.83 693.455  
80.84 884.155  
80.85 728.128  
80.86 797.473  
80.87 797.473  
80.88 884.155  
80.89 901.491  
80.9 762.8  
80.91 814.809  
80.92 745.464  
80.93 866.819  
80.94 1040.18  
80.95 953.5  
80.96 832.146  
80.97 1040.18  
80.98 936.164  
80.99 918.828  
81 1074.85  
81.01 1126.86  
81.02 1230.88  
81.03 1161.54  
81.04 918.828  
81.05 1265.56

|       |         |
|-------|---------|
| 81.06 | 970.837 |
| 81.07 | 918.828 |
| 81.08 | 1161.54 |
| 81.09 | 1092.19 |
| 81.1  | 1248.22 |
| 81.11 | 1230.88 |
| 81.12 | 1230.88 |
| 81.13 | 1022.85 |
| 81.14 | 1196.21 |
| 81.15 | 1629.62 |
| 81.16 | 1386.91 |
| 81.17 | 1248.22 |
| 81.18 | 1300.23 |
| 81.19 | 1213.55 |
| 81.2  | 1196.21 |
| 81.21 | 1126.86 |
| 81.22 | 918.828 |
| 81.23 | 1126.86 |
| 81.24 | 1525.6  |
| 81.25 | 1109.53 |
| 81.26 | 1074.85 |
| 81.27 | 1126.86 |
| 81.28 | 1161.54 |
| 81.29 | 1230.88 |
| 81.3  | 1074.85 |
| 81.31 | 953.5   |
| 81.32 | 1092.19 |
| 81.33 | 1196.21 |
| 81.34 | 1092.19 |
| 81.35 | 1178.87 |
| 81.36 | 1144.2  |
| 81.37 | 1022.85 |
| 81.38 | 988.173 |
| 81.39 | 1161.54 |
| 81.4  | 1369.57 |
| 81.41 | 1161.54 |
| 81.42 | 1300.23 |
| 81.43 | 1196.21 |
| 81.44 | 1473.59 |
| 81.45 | 1282.89 |
| 81.46 | 1282.89 |
| 81.47 | 1560.27 |
| 81.48 | 1352.24 |
| 81.49 | 1438.92 |

|       |         |
|-------|---------|
| 81.5  | 1300.23 |
| 81.51 | 1369.57 |
| 81.52 | 1386.91 |
| 81.53 | 1646.96 |
| 81.54 | 2028.36 |
| 81.55 | 1820.32 |
| 81.56 | 1854.99 |
| 81.57 | 2149.71 |
| 81.58 | 2271.06 |
| 81.59 | 2600.46 |
| 81.6  | 2444.43 |
| 81.61 | 2288.4  |
| 81.62 | 2617.79 |
| 81.63 | 2929.85 |
| 81.64 | 3120.55 |
| 81.65 | 2635.13 |
| 81.66 | 2877.84 |
| 81.67 | 3380.59 |
| 81.68 | 2981.86 |
| 81.69 | 3085.87 |
| 81.7  | 3276.57 |
| 81.71 | 3293.91 |
| 81.72 | 3085.87 |
| 81.73 | 2895.17 |
| 81.74 | 2999.19 |
| 81.75 | 3172.56 |
| 81.76 | 2808.49 |
| 81.77 | 2513.77 |
| 81.78 | 2513.77 |
| 81.79 | 2704.47 |
| 81.8  | 2201.72 |
| 81.81 | 2305.74 |
| 81.82 | 2149.71 |
| 81.83 | 1941.67 |
| 81.84 | 2167.05 |
| 81.85 | 2184.38 |
| 81.86 | 2115.04 |
| 81.87 | 2357.75 |
| 81.88 | 2236.39 |
| 81.89 | 2427.09 |
| 81.9  | 2236.39 |
| 81.91 | 2288.4  |
| 81.92 | 2357.75 |
| 81.93 | 2236.39 |

|       |         |
|-------|---------|
| 81.94 | 2357.75 |
| 81.95 | 2149.71 |
| 81.96 | 2167.05 |
| 81.97 | 2132.37 |
| 81.98 | 2028.36 |
| 81.99 | 2167.05 |
| 82    | 1646.96 |
| 82.01 | 1837.66 |
| 82.02 | 1768.31 |
| 82.03 | 1716.3  |
| 82.04 | 1629.62 |
| 82.05 | 1265.56 |
| 82.06 | 1404.25 |
| 82.07 | 1265.56 |
| 82.08 | 1282.89 |
| 82.09 | 1525.6  |
| 82.1  | 1248.22 |
| 82.11 | 1265.56 |
| 82.12 | 1265.56 |
| 82.13 | 1300.23 |
| 82.14 | 1421.58 |
| 82.15 | 1421.58 |
| 82.16 | 1265.56 |
| 82.17 | 988.173 |
| 82.18 | 1196.21 |
| 82.19 | 1490.93 |
| 82.2  | 1508.26 |
| 82.21 | 988.173 |
| 82.22 | 1421.58 |
| 82.23 | 1213.55 |
| 82.24 | 1716.3  |
| 82.25 | 1161.54 |
| 82.26 | 1317.56 |
| 82.27 | 1178.87 |
| 82.28 | 1196.21 |
| 82.29 | 1248.22 |
| 82.3  | 1386.91 |
| 82.31 | 1109.53 |
| 82.32 | 1230.88 |
| 82.33 | 1352.24 |
| 82.34 | 1109.53 |
| 82.35 | 1317.56 |
| 82.36 | 1074.85 |
| 82.37 | 1126.86 |



|       |         |
|-------|---------|
| 82.38 | 1213.55 |
| 82.39 | 1161.54 |
| 82.4  | 953.5   |
| 82.41 | 1074.85 |
| 82.42 | 1248.22 |
| 82.43 | 1040.18 |
| 82.44 | 1057.52 |
| 82.45 | 1300.23 |
| 82.46 | 970.837 |
| 82.47 | 1040.18 |
| 82.48 | 1005.51 |
| 82.49 | 1040.18 |
| 82.5  | 1126.86 |
| 82.51 | 1074.85 |
| 82.52 | 1057.52 |
| 82.53 | 1178.87 |
| 82.54 | 1074.85 |
| 82.55 | 936.164 |
| 82.56 | 1178.87 |
| 82.57 | 936.164 |
| 82.58 | 832.146 |
| 82.59 | 1178.87 |
| 82.6  | 988.173 |
| 82.61 | 849.482 |
| 82.62 | 901.491 |
| 82.63 | 1005.51 |
| 82.64 | 901.491 |
| 82.65 | 849.482 |
| 82.66 | 797.473 |
| 82.67 | 780.137 |
| 82.68 | 1005.51 |
| 82.69 | 693.455 |
| 82.7  | 658.782 |
| 82.71 | 797.473 |
| 82.72 | 1022.85 |
| 82.73 | 918.828 |
| 82.74 | 728.128 |
| 82.75 | 884.155 |
| 82.76 | 936.164 |
| 82.77 | 970.837 |
| 82.78 | 797.473 |
| 82.79 | 676.118 |
| 82.8  | 832.146 |
| 82.81 | 901.491 |

|       |         |
|-------|---------|
| 82.82 | 953.5   |
| 82.83 | 780.137 |
| 82.84 | 762.8   |
| 82.85 | 832.146 |
| 82.86 | 849.482 |
| 82.87 | 745.464 |
| 82.88 | 676.118 |
| 82.89 | 780.137 |
| 82.9  | 780.137 |
| 82.91 | 1040.18 |
| 82.92 | 849.482 |
| 82.93 | 710.791 |
| 82.94 | 676.118 |
| 82.95 | 797.473 |
| 82.96 | 762.8   |
| 82.97 | 745.464 |
| 82.98 | 953.5   |
| 82.99 | 1005.51 |
| 83    | 728.128 |
| 83.01 | 849.482 |
| 83.02 | 762.8   |
| 83.03 | 884.155 |
| 83.04 | 745.464 |
| 83.05 | 797.473 |
| 83.06 | 676.118 |
| 83.07 | 849.482 |
| 83.08 | 901.491 |
| 83.09 | 814.809 |
| 83.1  | 780.137 |
| 83.11 | 658.782 |
| 83.12 | 589.437 |
| 83.13 | 780.137 |
| 83.14 | 866.819 |
| 83.15 | 884.155 |
| 83.16 | 797.473 |
| 83.17 | 866.819 |
| 83.18 | 745.464 |
| 83.19 | 780.137 |
| 83.2  | 849.482 |
| 83.21 | 901.491 |
| 83.22 | 814.809 |
| 83.23 | 832.146 |
| 83.24 | 849.482 |
| 83.25 | 884.155 |

83.26 884.155  
83.27 780.137  
83.28 797.473  
83.29 970.837  
83.3 1040.18  
83.31 1005.51  
83.32 953.5  
83.33 936.164  
83.34 918.828  
83.35 676.118  
83.36 901.491  
83.37 1005.51  
83.38 693.455  
83.39 797.473  
83.4 797.473  
83.41 849.482  
83.42 1057.52  
83.43 866.819  
83.44 849.482  
83.45 832.146  
83.46 728.128  
83.47 884.155  
83.48 936.164  
83.49 901.491  
83.5 1040.18  
83.51 797.473  
83.52 745.464  
83.53 953.5  
83.54 1022.85  
83.55 1040.18  
83.56 901.491  
83.57 1109.53  
83.58 901.491  
83.59 693.455  
83.6 1126.86  
83.61 1022.85  
83.62 1282.89  
83.63 780.137  
83.64 988.173  
83.65 918.828  
83.66 1196.21  
83.67 953.5  
83.68 1109.53  
83.69 1126.86

|       |         |
|-------|---------|
| 83.7  | 1317.56 |
| 83.71 | 1300.23 |
| 83.72 | 1577.61 |
| 83.73 | 1560.27 |
| 83.74 | 1508.26 |
| 83.75 | 1924.34 |
| 83.76 | 1716.3  |
| 83.77 | 1976.35 |
| 83.78 | 1664.29 |
| 83.79 | 1976.35 |
| 83.8  | 1872.33 |
| 83.81 | 2253.73 |
| 83.82 | 2739.15 |
| 83.83 | 2600.46 |
| 83.84 | 2600.46 |
| 83.85 | 2825.83 |
| 83.86 | 3207.23 |
| 83.87 | 3016.53 |
| 83.88 | 2877.84 |
| 83.89 | 3449.94 |
| 83.9  | 3692.65 |
| 83.91 | 4022.04 |
| 83.92 | 4126.06 |
| 83.93 | 4160.73 |
| 83.94 | 4143.39 |
| 83.95 | 4368.77 |
| 83.96 | 4039.37 |
| 83.97 | 4022.04 |
| 83.98 | 4091.38 |
| 83.99 | 3814    |
| 84    | 3918.02 |
| 84.01 | 3484.61 |
| 84.02 | 3605.97 |
| 84.03 | 3415.26 |
| 84.04 | 3397.93 |
| 84.05 | 3363.26 |
| 84.06 | 3189.89 |
| 84.07 | 3189.89 |
| 84.08 | 3189.89 |
| 84.09 | 3016.53 |
| 84.1  | 2860.5  |
| 84.11 | 3033.86 |
| 84.12 | 2981.86 |
| 84.13 | 2895.17 |

|       |         |
|-------|---------|
| 84.14 | 2877.84 |
| 84.15 | 2860.5  |
| 84.16 | 2947.18 |
| 84.17 | 2721.81 |
| 84.18 | 2652.46 |
| 84.19 | 3241.9  |
| 84.2  | 3293.91 |
| 84.21 | 2999.19 |
| 84.22 | 2773.82 |
| 84.23 | 2600.46 |
| 84.24 | 2825.83 |
| 84.25 | 2253.73 |
| 84.26 | 2288.4  |
| 84.27 | 2392.42 |
| 84.28 | 2340.41 |
| 84.29 | 2409.76 |
| 84.3  | 1959.01 |
| 84.31 | 1750.97 |
| 84.32 | 1820.32 |
| 84.33 | 1941.67 |
| 84.34 | 1750.97 |
| 84.35 | 1438.92 |
| 84.36 | 1404.25 |
| 84.37 | 1525.6  |
| 84.38 | 1542.94 |
| 84.39 | 1352.24 |
| 84.4  | 1456.26 |
| 84.41 | 1456.26 |
| 84.42 | 1300.23 |
| 84.43 | 901.491 |
| 84.44 | 1508.26 |
| 84.45 | 1213.55 |
| 84.46 | 1126.86 |
| 84.47 | 1282.89 |
| 84.48 | 1074.85 |
| 84.49 | 1282.89 |
| 84.5  | 1265.56 |
| 84.51 | 1161.54 |
| 84.52 | 1178.87 |
| 84.53 | 1213.55 |
| 84.54 | 1178.87 |
| 84.55 | 884.155 |
| 84.56 | 884.155 |
| 84.57 | 901.491 |

|       |         |
|-------|---------|
| 84.58 | 1022.85 |
| 84.59 | 988.173 |
| 84.6  | 1040.18 |
| 84.61 | 814.809 |
| 84.62 | 1092.19 |
| 84.63 | 1178.87 |
| 84.64 | 1109.53 |
| 84.65 | 1213.55 |
| 84.66 | 1057.52 |
| 84.67 | 1248.22 |
| 84.68 | 1300.23 |
| 84.69 | 1074.85 |
| 84.7  | 1109.53 |
| 84.71 | 866.819 |
| 84.72 | 1178.87 |
| 84.73 | 1074.85 |
| 84.74 | 1334.9  |
| 84.75 | 1022.85 |
| 84.76 | 1074.85 |
| 84.77 | 797.473 |
| 84.78 | 1317.56 |
| 84.79 | 1161.54 |
| 84.8  | 1074.85 |
| 84.81 | 970.837 |
| 84.82 | 1438.92 |
| 84.83 | 1560.27 |
| 84.84 | 1404.25 |
| 84.85 | 1508.26 |
| 84.86 | 1993.68 |
| 84.87 | 1716.3  |
| 84.88 | 1698.96 |
| 84.89 | 1872.33 |
| 84.9  | 1785.65 |
| 84.91 | 2115.04 |
| 84.92 | 2184.38 |
| 84.93 | 2028.36 |
| 84.94 | 2115.04 |
| 84.95 | 1924.34 |
| 84.96 | 2236.39 |
| 84.97 | 2409.76 |
| 84.98 | 2721.81 |
| 84.99 | 2513.77 |
| 85    | 2409.76 |
| 85.01 | 2687.14 |

|       |         |
|-------|---------|
| 85.02 | 2583.12 |
| 85.03 | 2253.73 |
| 85.04 | 2392.42 |
| 85.05 | 1889.66 |
| 85.06 | 1750.97 |
| 85.07 | 2080.36 |
| 85.08 | 1924.34 |
| 85.09 | 2080.36 |
| 85.1  | 1698.96 |
| 85.11 | 1646.96 |
| 85.12 | 2028.36 |
| 85.13 | 1941.67 |
| 85.14 | 1629.62 |
| 85.15 | 1612.28 |
| 85.16 | 1750.97 |
| 85.17 | 1612.28 |
| 85.18 | 2011.02 |
| 85.19 | 1993.68 |
| 85.2  | 1854.99 |
| 85.21 | 1889.66 |
| 85.22 | 2184.38 |
| 85.23 | 1542.94 |
| 85.24 | 1733.64 |
| 85.25 | 1594.95 |
| 85.26 | 1941.67 |
| 85.27 | 1716.3  |
| 85.28 | 1681.63 |
| 85.29 | 1473.59 |
| 85.3  | 1438.92 |
| 85.31 | 1456.26 |
| 85.32 | 1525.6  |
| 85.33 | 1421.58 |
| 85.34 | 1248.22 |
| 85.35 | 1161.54 |
| 85.36 | 1404.25 |
| 85.37 | 1404.25 |
| 85.38 | 1074.85 |
| 85.39 | 1092.19 |
| 85.4  | 1109.53 |
| 85.41 | 1057.52 |
| 85.42 | 849.482 |
| 85.43 | 866.819 |
| 85.44 | 1022.85 |
| 85.45 | 1040.18 |

|       |         |
|-------|---------|
| 85.46 | 988.173 |
| 85.47 | 936.164 |
| 85.48 | 832.146 |
| 85.49 | 918.828 |
| 85.5  | 1144.2  |
| 85.51 | 1126.86 |
| 85.52 | 1126.86 |
| 85.53 | 884.155 |
| 85.54 | 745.464 |
| 85.55 | 901.491 |
| 85.56 | 762.8   |
| 85.57 | 762.8   |
| 85.58 | 936.164 |
| 85.59 | 537.427 |
| 85.6  | 918.828 |
| 85.61 | 970.837 |
| 85.62 | 676.118 |
| 85.63 | 710.791 |
| 85.64 | 710.791 |
| 85.65 | 780.137 |
| 85.66 | 814.809 |
| 85.67 | 710.791 |
| 85.68 | 641.446 |
| 85.69 | 866.819 |
| 85.7  | 918.828 |
| 85.71 | 780.137 |
| 85.72 | 866.819 |
| 85.73 | 1022.85 |
| 85.74 | 780.137 |
| 85.75 | 693.455 |
| 85.76 | 832.146 |
| 85.77 | 884.155 |
| 85.78 | 693.455 |
| 85.79 | 728.128 |
| 85.8  | 762.8   |
| 85.81 | 762.8   |
| 85.82 | 780.137 |
| 85.83 | 676.118 |
| 85.84 | 814.809 |
| 85.85 | 728.128 |
| 85.86 | 814.809 |
| 85.87 | 572.1   |
| 85.88 | 745.464 |
| 85.89 | 745.464 |



|       |         |
|-------|---------|
| 85.9  | 832.146 |
| 85.91 | 832.146 |
| 85.92 | 745.464 |
| 85.93 | 728.128 |
| 85.94 | 814.809 |
| 85.95 | 797.473 |
| 85.96 | 676.118 |
| 85.97 | 658.782 |
| 85.98 | 832.146 |
| 85.99 | 728.128 |
| 86    | 641.446 |
| 86.01 | 797.473 |
| 86.02 | 745.464 |
| 86.03 | 676.118 |
| 86.04 | 728.128 |
| 86.05 | 572.1   |
| 86.06 | 658.782 |
| 86.07 | 728.128 |
| 86.08 | 1161.54 |
| 86.09 | 797.473 |
| 86.1  | 693.455 |
| 86.11 | 849.482 |
| 86.12 | 658.782 |
| 86.13 | 728.128 |
| 86.14 | 693.455 |
| 86.15 | 728.128 |
| 86.16 | 710.791 |
| 86.17 | 745.464 |
| 86.18 | 676.118 |
| 86.19 | 693.455 |
| 86.2  | 936.164 |
| 86.21 | 814.809 |
| 86.22 | 762.8   |
| 86.23 | 762.8   |
| 86.24 | 762.8   |
| 86.25 | 710.791 |
| 86.26 | 676.118 |
| 86.27 | 884.155 |
| 86.28 | 728.128 |
| 86.29 | 728.128 |
| 86.3  | 832.146 |
| 86.31 | 780.137 |
| 86.32 | 936.164 |
| 86.33 | 849.482 |

86.34 970.837  
86.35 728.128  
86.36 762.8  
86.37 797.473  
86.38 762.8  
86.39 624.109  
86.4 970.837  
86.41 1040.18  
86.42 901.491  
86.43 814.809  
86.44 780.137  
86.45 710.791  
86.46 884.155  
86.47 953.5  
86.48 780.137  
86.49 970.837  
86.5 988.173  
86.51 988.173  
86.52 1213.55  
86.53 1092.19  
86.54 1040.18  
86.55 1074.85  
86.56 1369.57  
86.57 988.173  
86.58 1109.53  
86.59 1248.22  
86.6 1109.53  
86.61 1092.19  
86.62 1092.19  
86.63 1213.55  
86.64 1040.18  
86.65 988.173  
86.66 1126.86  
86.67 970.837  
86.68 1074.85  
86.69 1074.85  
86.7 1126.86  
86.71 1178.87  
86.72 970.837  
86.73 901.491  
86.74 1161.54  
86.75 953.5  
86.76 797.473  
86.77 1057.52

|       |         |
|-------|---------|
| 86.78 | 953.5   |
| 86.79 | 918.828 |
| 86.8  | 918.828 |
| 86.81 | 901.491 |
| 86.82 | 970.837 |
| 86.83 | 1074.85 |
| 86.84 | 918.828 |
| 86.85 | 1022.85 |
| 86.86 | 936.164 |
| 86.87 | 1057.52 |
| 86.88 | 1161.54 |
| 86.89 | 693.455 |
| 86.9  | 849.482 |
| 86.91 | 814.809 |
| 86.92 | 1109.53 |
| 86.93 | 1126.86 |
| 86.94 | 884.155 |
| 86.95 | 762.8   |
| 86.96 | 849.482 |
| 86.97 | 797.473 |
| 86.98 | 849.482 |
| 86.99 | 884.155 |
| 87    | 814.809 |
| 87.01 | 710.791 |
| 87.02 | 710.791 |
| 87.03 | 710.791 |
| 87.04 | 710.791 |
| 87.05 | 797.473 |
| 87.06 | 918.828 |
| 87.07 | 641.446 |
| 87.08 | 884.155 |
| 87.09 | 866.819 |
| 87.1  | 624.109 |
| 87.11 | 641.446 |
| 87.12 | 676.118 |
| 87.13 | 537.427 |
| 87.14 | 676.118 |
| 87.15 | 745.464 |
| 87.16 | 606.773 |
| 87.17 | 762.8   |
| 87.18 | 728.128 |
| 87.19 | 814.809 |
| 87.2  | 901.491 |
| 87.21 | 866.819 |

|       |         |
|-------|---------|
| 87.22 | 606.773 |
| 87.23 | 728.128 |
| 87.24 | 797.473 |
| 87.25 | 658.782 |
| 87.26 | 745.464 |
| 87.27 | 537.427 |
| 87.28 | 710.791 |
| 87.29 | 606.773 |
| 87.3  | 797.473 |
| 87.31 | 658.782 |
| 87.32 | 676.118 |
| 87.33 | 745.464 |
| 87.34 | 693.455 |
| 87.35 | 936.164 |
| 87.36 | 745.464 |
| 87.37 | 537.427 |
| 87.38 | 537.427 |
| 87.39 | 624.109 |
| 87.4  | 658.782 |
| 87.41 | 780.137 |
| 87.42 | 606.773 |
| 87.43 | 693.455 |
| 87.44 | 658.782 |
| 87.45 | 710.791 |
| 87.46 | 433.409 |
| 87.47 | 485.418 |
| 87.48 | 624.109 |
| 87.49 | 710.791 |
| 87.5  | 468.082 |
| 87.51 | 589.437 |
| 87.52 | 918.828 |
| 87.53 | 658.782 |
| 87.54 | 537.427 |
| 87.55 | 468.082 |
| 87.56 | 398.737 |
| 87.57 | 589.437 |
| 87.58 | 520.091 |
| 87.59 | 728.128 |
| 87.6  | 589.437 |
| 87.61 | 589.437 |
| 87.62 | 676.118 |
| 87.63 | 780.137 |
| 87.64 | 728.128 |
| 87.65 | 762.8   |

|       |         |
|-------|---------|
| 87.66 | 658.782 |
| 87.67 | 710.791 |
| 87.68 | 676.118 |
| 87.69 | 468.082 |
| 87.7  | 485.418 |
| 87.71 | 450.746 |
| 87.72 | 554.764 |
| 87.73 | 572.1   |
| 87.74 | 745.464 |
| 87.75 | 728.128 |
| 87.76 | 468.082 |
| 87.77 | 572.1   |
| 87.78 | 797.473 |
| 87.79 | 762.8   |
| 87.8  | 554.764 |
| 87.81 | 936.164 |
| 87.82 | 589.437 |
| 87.83 | 797.473 |
| 87.84 | 641.446 |
| 87.85 | 572.1   |
| 87.86 | 502.755 |
| 87.87 | 537.427 |
| 87.88 | 606.773 |
| 87.89 | 641.446 |
| 87.9  | 832.146 |
| 87.91 | 606.773 |
| 87.92 | 606.773 |
| 87.93 | 606.773 |
| 87.94 | 658.782 |
| 87.95 | 762.8   |
| 87.96 | 693.455 |
| 87.97 | 658.782 |
| 87.98 | 606.773 |
| 87.99 | 606.773 |
| 88    | 554.764 |
| 88.01 | 624.109 |
| 88.02 | 485.418 |
| 88.03 | 676.118 |
| 88.04 | 658.782 |
| 88.05 | 589.437 |
| 88.06 | 589.437 |
| 88.07 | 606.773 |
| 88.08 | 693.455 |
| 88.09 | 572.1   |

88.1 676.118  
88.11 710.791  
88.12 485.418  
88.13 641.446  
88.14 658.782  
88.15 693.455  
88.16 502.755  
88.17 658.782  
88.18 693.455  
88.19 641.446  
88.2 589.437  
88.21 624.109  
88.22 572.1  
88.23 572.1  
88.24 693.455  
88.25 624.109  
88.26 693.455  
88.27 572.1  
88.28 710.791  
88.29 728.128  
88.3 762.8  
88.31 537.427  
88.32 658.782  
88.33 710.791  
88.34 676.118  
88.35 485.418  
88.36 745.464  
88.37 710.791  
88.38 537.427  
88.39 450.746  
88.4 693.455  
88.41 606.773  
88.42 624.109  
88.43 658.782  
88.44 572.1  
88.45 624.109  
88.46 676.118  
88.47 537.427  
88.48 589.437  
88.49 485.418  
88.5 658.782  
88.51 606.773  
88.52 745.464  
88.53 624.109

88.54 606.773  
88.55 780.137  
88.56 693.455  
88.57 693.455  
88.58 710.791  
88.59 502.755  
88.6 728.128  
88.61 745.464  
88.62 589.437  
88.63 884.155  
88.64 485.418  
88.65 676.118  
88.66 745.464  
88.67 745.464  
88.68 589.437  
88.69 745.464  
88.7 728.128  
88.71 658.782  
88.72 572.1  
88.73 606.773  
88.74 572.1  
88.75 814.809  
88.76 606.773  
88.77 710.791  
88.78 606.773  
88.79 572.1  
88.8 710.791  
88.81 762.8  
88.82 624.109  
88.83 745.464  
88.84 537.427  
88.85 572.1  
88.86 797.473  
88.87 676.118  
88.88 710.791  
88.89 745.464  
88.9 658.782  
88.91 658.782  
88.92 710.791  
88.93 658.782  
88.94 468.082  
88.95 381.4  
88.96 762.8  
88.97 624.109

|       |         |
|-------|---------|
| 88.98 | 641.446 |
| 88.99 | 485.418 |
| 89    | 658.782 |
| 89.01 | 728.128 |
| 89.02 | 676.118 |
| 89.03 | 676.118 |
| 89.04 | 589.437 |
| 89.05 | 468.082 |
| 89.06 | 554.764 |
| 89.07 | 624.109 |
| 89.08 | 693.455 |
| 89.09 | 572.1   |
| 89.1  | 832.146 |
| 89.11 | 624.109 |
| 89.12 | 485.418 |
| 89.13 | 450.746 |
| 89.14 | 762.8   |
| 89.15 | 676.118 |
| 89.16 | 520.091 |
| 89.17 | 745.464 |
| 89.18 | 468.082 |
| 89.19 | 641.446 |
| 89.2  | 520.091 |
| 89.21 | 710.791 |
| 89.22 | 485.418 |
| 89.23 | 416.073 |
| 89.24 | 658.782 |
| 89.25 | 606.773 |
| 89.26 | 641.446 |
| 89.27 | 728.128 |
| 89.28 | 572.1   |
| 89.29 | 468.082 |
| 89.3  | 433.409 |
| 89.31 | 485.418 |
| 89.32 | 641.446 |
| 89.33 | 762.8   |
| 89.34 | 589.437 |
| 89.35 | 658.782 |
| 89.36 | 589.437 |
| 89.37 | 624.109 |
| 89.38 | 676.118 |
| 89.39 | 710.791 |
| 89.4  | 606.773 |
| 89.41 | 624.109 |



89.42 502.755  
89.43 832.146  
89.44 589.437  
89.45 693.455  
89.46 728.128  
89.47 641.446  
89.48 676.118  
89.49 450.746  
89.5 572.1  
89.51 624.109  
89.52 710.791  
89.53 658.782  
89.54 537.427  
89.55 745.464  
89.56 554.764  
89.57 554.764  
89.58 554.764  
89.59 572.1  
89.6 520.091  
89.61 745.464  
89.62 520.091  
89.63 589.437  
89.64 624.109  
89.65 485.418  
89.66 641.446  
89.67 797.473  
89.68 728.128  
89.69 520.091  
89.7 658.782  
89.71 745.464  
89.72 658.782  
89.73 745.464  
89.74 641.446  
89.75 710.791  
89.76 658.782  
89.77 832.146  
89.78 710.791  
89.79 641.446  
89.8 572.1  
89.81 537.427  
89.82 624.109  
89.83 502.755  
89.84 849.482  
89.85 745.464

|       |         |
|-------|---------|
| 89.86 | 676.118 |
| 89.87 | 589.437 |
| 89.88 | 849.482 |
| 89.89 | 693.455 |
| 89.9  | 537.427 |
| 89.91 | 693.455 |
| 89.92 | 641.446 |
| 89.93 | 520.091 |
| 89.94 | 537.427 |
| 89.95 | 589.437 |
| 89.96 | 537.427 |
| 89.97 | 693.455 |
| 89.98 | 624.109 |
| 89.99 | 693.455 |
| 90    | 450.746 |
